# Supplementary material for: Implicating genes, pleiotropy, and sexual dimorphism at blood lipid loci through multi-ancestry meta-analysis
Source: PubMed Central journal article supplement (PMC9793579; doi:10.1186/s13059-022-02837-1), 2022-12-27
Supplement: 13059_2022_2837_MOESM15_ESM.pdf [file 13059_2022_2837_MOESM15_ESM.pdf]

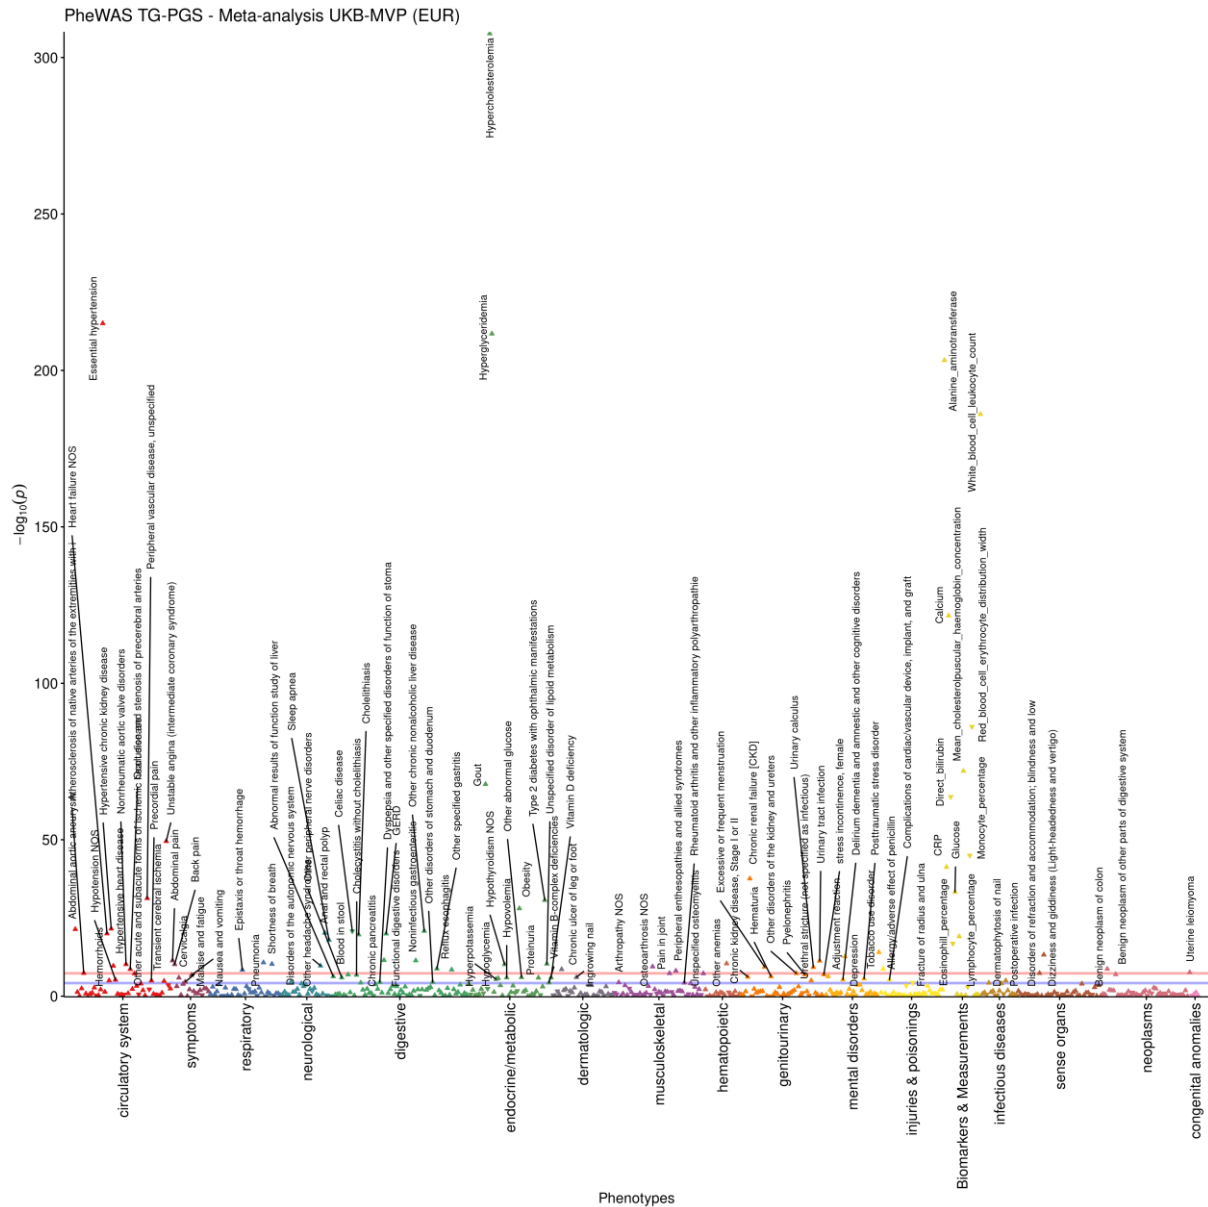

**Figure S7. PheWAS meta-analysis results for the trans-ethnic TG PGS in UK Biobank and MVP.** The blue horizontal line denotes phenome-wide significance ( $p \leq 6.5 \times 10^{-5}$ ) and the red line is genome-wide significance ( $p \leq 5 \times 10^{-8}$ ). Phenotypes have been pruned, so that the most significant one per correlated phenotype group (correlation coefficient  $> 0.2$ ) is retained. Pairwise correlations were estimated with chi-square test and Cramer's V for the dichotomous phenotypes and Pearson's correlation for the continuous phenotypes. Full phenome-wide significant results are presented in **Additional file 12: Table S8**.
