# Supplementary material for: Implicating genes, pleiotropy, and sexual dimorphism at blood lipid loci through multi-ancestry meta-analysis
Source: Springer Nature journal article supplement (doi:10.1186/s13059-022-02837-1), 2022-12-27
Supplement: MOESM6 [file 13059_2022_2837_MOESM6_ESM.pdf]

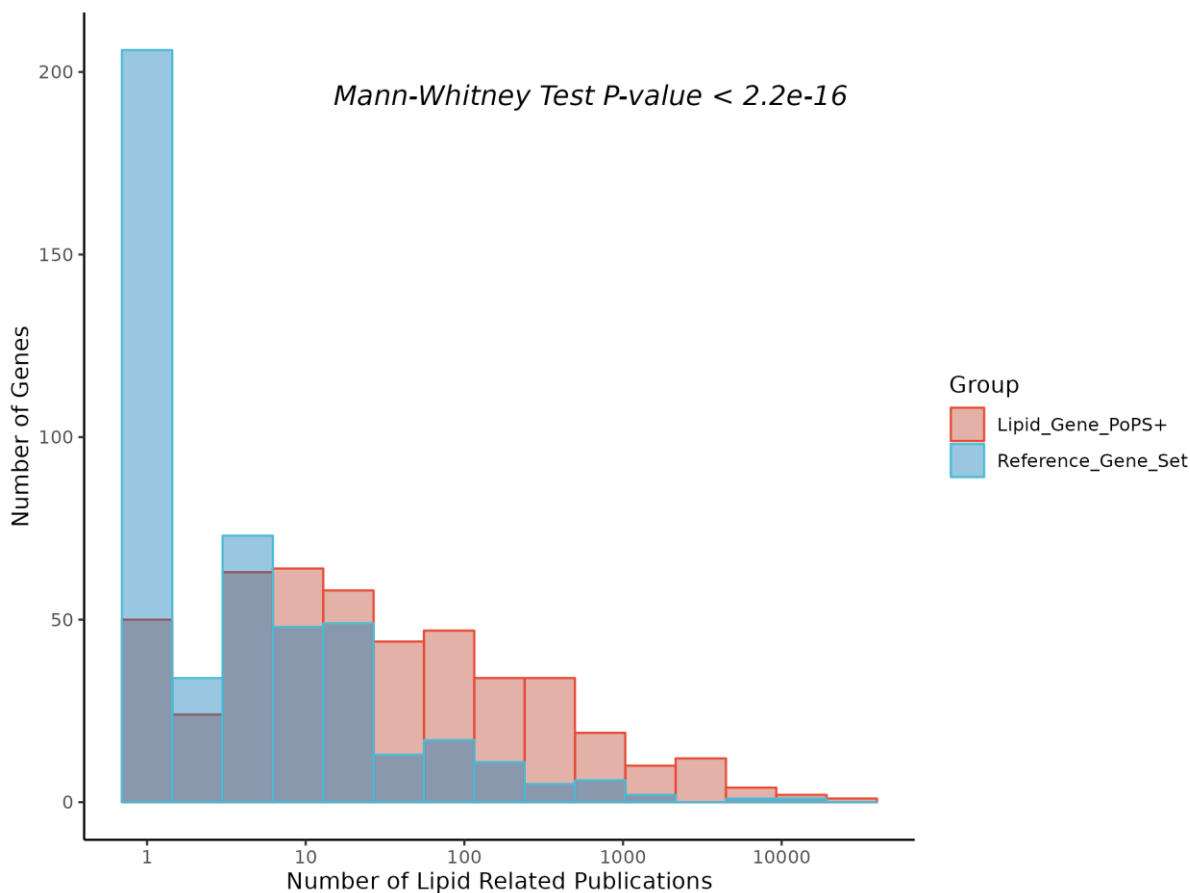

**Figure S2. Frequency distribution of the lipid-related publications for both high confidence genes and the baseline genes.** The A Mann-Whitney U test showed that there was a significant difference ( $W = 52353$ ,  $p\text{-value} < 2.2e-16$ ) between the high confidence gene group compared to the baseline group. The exact numbers of lipid-related publications for the high confidence prioritized genes can be found in **Additional file 7: Table S5**.
