# Supplementary material for: Implicating genes, pleiotropy, and sexual dimorphism at blood lipid loci through multi-ancestry meta-analysis
Source: Genome Biol. 2022 Dec 27;23:268. doi: 10.1186/s13059-022-02837-1 (PMC9793579; doi:10.1186/s13059-022-02837-1)
Supplement: Supplementary file 1 — Additional file 1: Table S1. Characteristics of contributing cohorts (as provided by each participating cohort). [file 13059_2022_2837_MOESM1_ESM.xlsx]

## Sheet: Sheet1
Table S1. Characteristics of contributing cohorts (as provided by each participating cohort)
Cohort	Full Cohort Name	Ancestry	N (from TC)	Percent Male	mean Age	mean Age Women	mean Age Men	Fasting Status	Lipid Lowering Meds	Lipid Lowering Meds Women	Lipid Lowering Meds Men	mean HDL	mean HDL Women	mean HDL Men	mean LDL	LDL measured/Friedewald	mean LDL Women	mean LDL Men	mean TG	mean TG Women	mean TG Men	mean TC	mean TC Women	mean TC Men	Genotyping Array	Imputation Software	Imputation Panel	Association Software	Reference
ACD	ACD	EAS	150	0.51	52.5	51.5	53.4	Unknown	Unknown	Unknown	Unknown	43	46.1	39.7	109	Unknown	112	105.8	140.1	114.3	166.6	192.4	196.1	188.5		Minimac3	1KGP3	rvtests
AE	Athero-Express Biobank Study	EUR	1015	0.47	68.7	NA	68.8	fasting	Yes	NA	Yes	45.7	NA	43.4	140.2	Measured	NA	136	146.6	NA	147.4	215.1	NA	208.1	Affymetrix SNP 5.0; Affymetrix Axiom CEU	Impute2	1KGP3	rvtests	https://pubmed.ncbi.nlm.nih.gov/15678794/;https://pubmed.ncbi.nlm.nih.gov/25721704/
AGES	Age Gene/Environment Susceptibility Reykjavik Study	EUR	3214	0.42	76.41	76.34	76.52	Unknown	Unknown	Unknown	Unknown	61.19	66.34	54.08	135.6	Friedewald	142.9	125.6	106.4	107.88	104.34	217.9	230.6	200.4	Illumina Hu370CNV	Unknown	1KGP3	rvtests	https://pubmed.ncbi.nlm.nih.gov/17351290/
ALSPAC: Children	Avon Longitudinal Study of Parents and Children	EUR	6055	0.51	13.7	13.85	13.49	Unknown	No	No	No	52.1	53.22	50.92	85.1	Measured	88.57	81.8	84.5	86.19	82.89	154.8	159.6	150.16	Illumina HumanHap550 Quad	Minimac	HRC and 1KGP3	rvtests	https://www.ncbi.nlm.nih.gov/pmc/articles/PMC3600618/
ALSPAC: Mothers	Avon Longitudinal Study of Parents and Children	EUR	1536	0	48.2	48.23	NA	fasting	Yes	Yes	NA	56.4	56.42	NA	116.6	Measured	116.58	NA	93.8	93.8	NA	191.7	191.69	NA	Illumina Human660W Quad	Minimac	HRC and 1KGP3	rvtests	https://www.ncbi.nlm.nih.gov/pmc/articles/PMC3600619/
ARIC	Atherosclerosis Risk in Communities Study	AdmAFR	2538	0.37	53.4	53.15	53.72	Fasting	23% of individuals	12% of individuals	41% of individuals	55.3	58.2	50.48	138.5	Friedewald	138.81	137.87	110.6	106.63	117.38	215.4	218.05	211.06	Affymetrix 6.0	Minimac	1KGP3	rvtests	https://pubmed.ncbi.nlm.nih.gov/2646917/
ARIC	Atherosclerosis Risk in Communities Study	EUR	9123	0.47	54.3	53.94	54.7	fasting	62% of individuals	76% of individuals	47% of individuals	50.6	57.4	42.78	137.6	Friedewald	135.54	139.92	137.2	128.43	147.12	214.9	218.44	210.88	Affymetrix 6.0	Minimac	HRC	rvtests	https://pubmed.ncbi.nlm.nih.gov/2646917/
ASCOT-SC	Anglo-Scandinavian Cardiac Outcomes Trial	EUR	2486	0.74	61	63.18	60.2	Fasting	9.33% of individuals	11.68% of individuals	8.51% of individuals	51.4	57.29	49.34	151.8	Measured	160.4	148.8	160.2	161.2	159.9	229	242.2	224.4	Illumina Human Omni Exome Express v8.1	Minimac	HRC and 1KGP3	rvtests	https://pubmed.ncbi.nlm.nih.gov/11685901/
ASCOT-UK	Anglo-Scandinavian Cardiac Outcomes Trial	EUR	3804	0.82	63.7	64.47	63.54	Fasting	11.49% of individuals	15.45% of individuals	10.64% of individuals	49.4	55.16	48.21	154.8	Measured	168.9	151.7	165.9	169.5	165.1	229.8	247.7	226	Illumina HumanCNV 370	Minimac	HRC and 1KGP3	rvtests	https://pubmed.ncbi.nlm.nih.gov/11685901/
ASPS	Austrian Stroke Prevention Study	EUR	829	0.43	65.3	65.8	64.57	Fasting	9.9% of individuals	Unknown	Unknown	56.1	61.35	49.17	145.4	Measured	147.51	142.57	133.1	121.83	147.78	227.8	233.59	220.25	Illumina Human610-Quad BeadChip	Minimac	HRC and 1KGP3	rvtests	https://pubmed.ncbi.nlm.nih.gov/10408549/;https://pubmed.ncbi.nlm.nih.gov/7800110/
ASPS-Fam	Austrian Stroke Prevention Family Study	EUR	327	0.4	64.2	64.54	63.71	Fasting	18.65% of individuals	Unknown	Unknown	68.1	74.39	58.79	120.3	Measured	121.48	118.54	123.7	110.53	143.5	210.4	215.95	201.99	Affymetrix Genome-Wide Human SNP Array 6.0	Minimac	HRC and 1KGP3	rvtests	https://pubmed.ncbi.nlm.nih.gov/25309438/;https://pubmed.ncbi.nlm.nih.gov/25443291/
AUGUR	Age-related diseases: Understanding Genetic and non-genetic influences - a study at the University of Regensburg	EUR	983	0.53	77.5	77.2022	77.7637	Non-fasting	Unknown	Unknown	Unknown	59.2	65.0168	54.1731	145.8	Measured	152.434	140.104	171.1	165.336	176.177	218.3	231.007	207.282	Illumina Infinium Global Screening Array 24	Minimac	1KGP3	rvtests	https://pubmed.ncbi.nlm.nih.gov/26489512/
B58C	British 1958 birth cohort	EUR	6007	0.5	45.2	45.159	45.168	Non-fasting	Unknown	Unknown	Unknown	60.4	65.159	55.569	132.1	Friedewald	127.147	137.627	182.4	143.572	221.868	227.3	220.342	234.495	British 1958 birth cohort	Minimac	HRC and 1KGP3	rvtests	https://pubmed.ncbi.nlm.nih.gov/17255346/
BAS Case	the Beijing Atherosclerosis Study	EAS	505	0.85	52.13	55.43	51.56	Fasting	Yes	Yes	Yes	40.8	45.25	40.05	125	Friedewald	124.42	125.15	164.7	190.04	160.27	199	205.54	197.89	Affymetrix 500K	Minimac	1KGP3	rvtests	https://pubmed.ncbi.nlm.nih.gov/22751097/
BAS Control	the Beijing Atherosclerosis Study	EAS	1021	0.74	48.19	48.95	47.92	fasting	Yes	Yes	Yes	50.7	52.47	50.05	109.8	Friedewald	109.41	109.88	130.5	130.99	130.27	186.3	187.88	185.7	Affymetrix 500K	Minimac	1KGP3	rvtests	https://pubmed.ncbi.nlm.nih.gov/22751097/
BBJ-OEEv10	BioBank Japan	EAS	23628	0.57	68.9	70.8754	67.4029	Unknown	9234 individuals	4680 individuals	4554 individuals	52.4	56.0266	49.7782	NA	NA	NA	NA	NA	NA	NA	209.2	220.462	200.58	HumanOmniExpressExome-8 v1.0	Minimac	1KGP3	rvtests	https://pubmed.ncbi.nlm.nih.gov/28189464/;https://pubmed.ncbi.nlm.nih.gov/28190657/
BBJ-OEEv12	BioBank Japan	EAS	84564	0.54	62.7	62.7181	62.6609	Unknown	23925 individuals	11692 individuals	12233 individuals	54	58.8338	50.4569	NA	NA	NA	NA	NA	NA	NA	210.5	218.812	203.471	HumanOmniExpressExome-8 v1.2	Minimac	1KGP3	rvtests	https://pubmed.ncbi.nlm.nih.gov/28189464/;https://pubmed.ncbi.nlm.nih.gov/28190657/
BBJ-OEHE	BioBank Japan	EAS	22858	0.54	61.2	57.6646	64.1916	Unknown	4362 individuals	2131 individuals	2231 individuals	55.8	60.3002	52.1549	NA	NA	NA	NA	NA	NA	NA	201.1	209.809	193.747	HumanOmniExprss-12 v1.0 and (HumanExome-12 v1.0 or HumanExome-12 v1.1)	Minimac	1KGP3	rvtests	https://pubmed.ncbi.nlm.nih.gov/28189464/;https://pubmed.ncbi.nlm.nih.gov/28190657/
BES-610	Beijing Eye Study	EAS	820	0.35	58.5	57.77	59.68	Fasting	Yes	Yes	Yes	58.3	59.36	56.31	116.5	Measured	120.75	108.78	152.6	159.65	139.71	197.9	202.95	188.63	Illumina Human610-Quad Beadchips	Minimac	1KGP3	rvtests	https://pubmed.ncbi.nlm.nih.gov/19426355/
BES-omni	Beijing Eye Study	EAS	779	0.41	61.6	60.52	63.11	Fasting	Yes	Yes	Yes	56.8	59.73	52.64	124.6	Measured	128.52	118.94	160.1	163.25	155.64	203.8	210.63	193.98	Illumina OmniExpress	Minimac	1KGP3	rvtests	https://pubmed.ncbi.nlm.nih.gov/19426355/
BioMe	Mount Sinai BioMe BioBank	EUR	566	0.51	64.5	64.156	64.8209	Fasting	Yes	YES	YES	70.3	73.4255	64.6077	108.1	Measured	112.601	103.69	122.1	115.09	128.537	187.2	200.511	174.469	Illumina HumanOmniExpressExome-8 v1.0	Minimac	HRC	rvtests
BioMe	Mount Sinai BioMe BioBank	AdmAFR	1351	0.35	48.6	48.9429	47.9415	Fasting	Yes	YES	YES	66.2	66.3987	65.7169	110.3	Measured	111.525	107.985	121.6	118.455	127.039	186.1	188.866	181.048	Illumina HumanOmniExpressExome-8 v1.0	Impute2	1KGP3	rvtests
BioMe	Mount Sinai BioMe BioBank	HIS	1636	0.4	50.7	50.5469	50.8759	Fasting	Yes	YES	YES	63.8	64.1071	62.8848	109	Measured	109.745	107.911	147.8	142.676	155.444	185	189.65	178.232	Illumina HumanOmniExpressExome-8 v1.0	Impute2	1KGP3	rvtests
BMES	BMES	EUR	828	0.45	62.9	62.52	63.25	Fasting	Unknown	Not available	Not available	56.1	61.0986	49.4976	148.5	Friedewald	150.426	146.173	147.9	143.483	152.34	220	226.993	211.525	Illumina Human Core Exome Array	Minimac	HRC and 1KGP3	rvtests
BRIGHT	British Genetics of Hypertension Trial	EUR	1540	0.39	57.1	57.5	56.4	Non-fasting	9.8% of individuals	8% of individuals	12.4% of individuals	52.4	56.4	46.1	129.5	Friedewald	132.5	124.9	194.1	173.3	226.6	220.3	223.6	215.1	Affymetrix GeneChip 500k	Minimac	HRC and 1KGP3	rvtests	https://pubmed.ncbi.nlm.nih.gov/12826435/
CAGE_GWAS1	Cardio-metabolic Genome Epidemiology Network	EAS	1290	0.61	66	66.4	65.7	Fasting	No	No	No	59.6	65.8	55.6	122.9	Measured	132.2	117	118.3	108.2	124.8	205.9	219.5	197.1	Illumina 550K/610K	Minimac	1KGP3	rvtests	https://pubmed.ncbi.nlm.nih.gov/21971053/
CAGE-Amagasaki	Cardio-metabolic Genome Epidemiology Network, Amagasaki	EAS	560	0.69	46.2	46	46.3	Fasting	No	No	No	58.6	66.3	55.1	122.6	Friedewald	120.9	123.4	116.1	93.2	126.5	204.1	205	203.6	Illumina Omni-2.5M	Minimac	1KGP3	rvtests	https://pubmed.ncbi.nlm.nih.gov/19262484/
CAGE-KING-omni2	Kita-Nagoya Genomic Epidemiology Study of the CAGE Network	EAS	527	0.58	63.1	63.0315	63.0721	Fasting	40 individuals	27 individuals	13 individuals	61.9	66.9955	58.2295	138.2	60% Measured, 40% Friedewald	151.959	128.06	114.2	102.833	122.511	216.7	230.699	206.523	Illumina HumanOmni2.5-8	Minimac	1KGP3	rvtests	https://pubmed.ncbi.nlm.nih.gov/19727657/
CAGE-KING-omniE1	Kita-Nagoya Genomic Epidemiology Study of the CAGE Network	EAS	817	0.41	63.2	62.1196	64.6596	Fasting	64 individuals	50 individuals	14 individuals	64	67.701	58.6536	143.7	92% Measured, 8% Friedewald	152.871	130.249	113.5	101.718	130.816	222.6	231.108	210.142	Illumina HumanOmniExpress-12	Minimac	1KGP3	rvtests	https://pubmed.ncbi.nlm.nih.gov/19727657/
CAGE-KING-omniE2	Kita-Nagoya Genomic Epidemiology Study of the CAGE Network	EAS	615	0.25	62	60.8874	65.281	Fasting	55 individuals	46 individuals	9 individuals	64.6	66.9957	57.2549	136.8	36% Measured, 64% Friedewald	141.608	122.339	110.3	107.002	120.092	220.3	227.083	199.725	Illumina HumanOmniExpress-24	Minimac	1KGP3	rvtests	https://pubmed.ncbi.nlm.nih.gov/19727657/
CAGE-KING-QUAD	Kita-Nagoya Genomic Epidemiology Study of the CAGE Network	EAS	494	0.81	69.5	73.1038	68.5077	Fasting	36 individuals	15 individuals	21 individuals	60.6	69.0094	58.2526	138.2	80% Measured, 20% Friedewald	154.24	133.832	118.7	106.689	121.956	214.6	231.333	209.993	Illumina Human660W-Quad	Minimac	1KGP3	rvtests	https://pubmed.ncbi.nlm.nih.gov/19727657/
CARDIA	Coronary Artery Risk Development in Young Adults	AdmAFR	858	0.38	24.5	24.458	24.488	Fasting	Unknown	Unknown	Unknown	54.4	54.5	54.134	111.7	Measured	113.2	109.244	65.4	63.3	68.979	179.2	180.4	177.162	Affymetrix 6.0	Minimac	1KGP3	rvtests	https://pubmed.ncbi.nlm.nih.gov/3204420/
CARDIA	Coronary Artery Risk Development in Young Adults	EUR	1540	0.46	25.6	25.532	25.627	Fasting	Unknown	Unknown	Unknown	52.2	56.2	47.371	108.7	Measured	105.6	112.481	78.9	70.6	88.756	176.6	175.9	177.331	Affymetrix 6.0	Minimac	HRC and 1KGP3	rvtests	https://pubmed.ncbi.nlm.nih.gov/3204420/
CARDIOGENICS-CAD Case	CARDIOGENICS	EUR	218	0.88	57	59.451	56.6158	Fasting	Unknown	Unknown	Unknown	46.5	56.8327	44.9313	93.1	Measured	94.4422	92.8893	NA	NA	NA	164.5	173.098	191	Human660W-Quad_v1_A	Minimac	HRC and 1KGP3	rvtests	https://pubmed.ncbi.nlm.nih.gov/17634449/
CAS Case	the China Atherosclerosis Study	EAS	1010	0.84	49.18	54.25	48.25	Fasting	Yes	Yes	Yes	38.6	44.22	37.61	99.5	Friedewald	104.18	98.69	170.4	169.53	170.59	177.5	186.74	175.84	Axiom CHB1	Minimac	1KGP3	rvtests	https://pubmed.ncbi.nlm.nih.gov/22751097/
CAS Control	the China Atherosclerosis Study	EAS	3998	0.47	52.53	52.41	52.67	Fasting	Yes	Yes	Yes	49.9	50.93	48.77	105.6	Friedewald	107.18	103.73	159.2	158.92	159.6	185.8	188.73	182.57	Axiom CHB1	Minimac	1KGP3	rvtests	https://pubmed.ncbi.nlm.nih.gov/22751097/
CFS	Cleveland Family Study	AdmAFR	473	0.4	45.7	45.63	45.8	Fasting	Yes	Yes	Yes	46.3	49.26	41.94	NA	NA	NA	NA	NA	NA	NA	175.6	174	178	Affymetrix 6.0	Minimac	1KGP3	rvtests	https://pubmed.ncbi.nlm.nih.gov/2970865/
CFS	Cleveland Family Study	EUR	549	0.47	47.8	46.03	48.31	Fasting	Yes	Yes	Yes	45.6	49.96	40.48	NA	NA	NA	NA	NA	NA	NA	184.7	184.2	185.2	Illumina Omni	Minimac	HRC and 1KGP3	rvtests	https://pubmed.ncbi.nlm.nih.gov/2970865/
CHIP	Cardiovascular Health Improvement Project	EUR	1112	0.74	63.9	63.9	63.8	Unknown	52% of individuals	44% of individuals	55% of individuals	48.6	56.3	45.7	93.4	Measured	99.7	91	179.4	180.5	179	175.6	191.3	170	Illumina Human CoreExome	Minimac	HRC and 1KGP3	rvtests
CHNS	China Health and Nutrition Survey	EAS	8316	0.47	47.3	47.7	46.8	Unknown	No	No	No	55.4	57.1	53.4	112.8	Measured	115	110.4	143.6	134.4	154.1	184.9	154.1	182.7	HumanCoreExome	Minimac	1KGP3	rvtests	https://pubmed.ncbi.nlm.nih.gov/19887509/
CHOP	Children's Hospital of Philadelphia Cohort	EUR	1949	0.54	9.7	10.5168	9.09221	Non-fasting	Unknown	Unknown	Unknown	49.5	49.8688	49.2228	91.5	Both	93.9483	89.2565	93.7528	95.1197	92.5988	160.2	162.846	157.98	Illumina 550,610	Impute2	HRC and 1KGP3	rvtests
CHOP	Children's Hospital of Philadelphia Cohort	AdmAFR	2864	0.47	10.8	11.1166	10.1067	Non-fasting	Unknown	Unknown	Unknown	50.9	50.5365	51.2613	93.7	Both	93.9024	93.496	78.313	78.5091	78.1025	160.2	160.56	159.763	Illumina 550,610	Impute2	1KGP3	rvtests
CHS	Cardiovascular Health Study	AdmAFR	776	0.37	72.8	72.894	72.728	Fasting	Yes	Yes	Yes	58.1	61.1902	52.8781	131.7	Friedewald	135.806	124.824	113.8	114.123	133.15	212.6	219.605	200.79	Illumina Omni	Minimac	HRC	rvtests	https://pubmed.ncbi.nlm.nih.gov/7874780/
CHS	Cardiovascular Health Study	EUR	3158	0.39	72.4	71.929	73.014	Fasting	Yes	Yes	Yes	55.5	60.2657	48.244	131.1	Friedewald	136.241	123.273	135.1	136.21	133.262	213.7	223.696	198.3	Illumina 370CNV	Minimac	HRC	rvtests	https://pubmed.ncbi.nlm.nih.gov/7874780/
Cilento370K	Genetic Park of Cilento and Vallo di Diano Project	EUR	833	0.45	53.7	53.5	53.8	Fasting	55 individuals	25 individuals	30 individuals	61.3	65.4	56.2	119.1	Friedewald	119.3	118.8	152.6	133.3	176.1	210.1	211.4	208.5	Illumina 370K	Minimac	HRC and 1KGP3	rvtests	https://pubmed.ncbi.nlm.nih.gov/17476112/; https://pubmed.ncbi.nlm.nih.gov/19550436/
Cilento700K	Genetic Park of Cilento and Vallo di Diano Project	EUR	745	0.44	53.3	54.4	51.9	Fasting	42 individuals	17 individuals	25 individuals	61.2	66.3	54.7	120.9	Friedewald	119.8	122.3	141.6	119.2	170.3	209.7	209.6	209.9	Illumina OmniExpress	Minimac	HRC and 1KGP3	rvtests	https://pubmed.ncbi.nlm.nih.gov/17476112/; https://pubmed.ncbi.nlm.nih.gov/19550436/
CKB12-ASVD Case	China Kadoorie Biobank RC12	EAS	276	0.61	54.7	57.2523	53.1598	Non-fasting	No	No	No	48.2	48.5833	47.96	114.2	Measured	116.921	112.52	157.973	152.351	161.639	213.3	217.694	210.594	Affymetrix Axiom CKB_1	Impute4	1KGP3	rvtests
CKB12-Control	China Kadoorie Biobank RC12	EAS	168	0.58	55.8	58.6901	53.6392	Non-fasting	No	No	No	48.6	50.3799	47.2372	106	Measured	111.609	101.838	162.867	169.074	158.469	203.3	211.71	197.093	Affymetrix Axiom CKB_1	Impute4	1KGP3	rvtests
CKB12-HS Case	China Kadoorie Biobank RC12	EAS	138	0.54	56.6	59.2698	54.4267	Non-fasting	No	No	No	50.9	51.517	50.4411	110.7	Measured	115.249	106.946	141.099	142.44	139.982	209.2	216.669	203.012	Affymetrix Axiom CKB_1	Impute4	1KGP3	rvtests
CKB16-ASVD Case	China Kadoorie Biobank RC16	EAS	1455	0.46	52.8	53.4313	52.1731	Non-fasting	No	No	No	46	48.551	43.053	101.7	Measured	102.782	100.37	159.576	145.385	177.657	193.8	196.681	190.572	Affymetrix Axiom CKB_1	Impute4	1KGP3	rvtests
CKB16-Control	China Kadoorie Biobank RC16	EAS	451	0.54	54.8	57.1262	52.9143	Non-fasting	No	No	No	46.4	48.8913	44.2227	97.3	Measured	99.5189	95.3539	152.303	135.336	168.205	189	192.145	186.32	Affymetrix Axiom CKB_1	Impute4	1KGP3	rvtests
CKB16-HS Case	China Kadoorie Biobank RC16	EAS	342	0.51	56.9	58.485	55.4457	Non-fasting	No	No	No	46.5	48.055	44.992	95.1	Measured	101.068	89.3167	155.97	154.668	157.223	187.2	195.909	178.834	Affymetrix Axiom CKB_1	Impute4	1KGP3	rvtests
CKB26-ASVD Case	China Kadoorie Biobank RC26	EAS	217	0.41	55.5	54.8031	56.4667	Non-fasting	No	No	No	50.8	54.7287	45.3599	118	Measured	121.159	113.66	146.252	132.737	167.696	213.2	219.484	204.246	Affymetrix Axiom CKB_1	Impute4	1KGP3	rvtests
CKB26-Control	China Kadoorie Biobank RC26	EAS	108	0.61	60	62.619	58.303	Non-fasting	No	No	No	48.1	52.2045	45.4372	118	Measured	121.433	115.805	139.294	123.489	150.389	208.8	215.097	204.822	Affymetrix Axiom CKB_1	Impute4	1KGP3	rvtests
CKB26-HS Case	China Kadoorie Biobank RC26	EAS	85	0.54	62.2	64.4615	60.3261	Non-fasting	No	No	No	47.4	50.8957	44.4032	116.4	Measured	117.339	115.649	137.914	124.359	150.558	207.2	209.869	204.875	Affymetrix Axiom CKB_1	Impute4	1KGP3	rvtests
CKB36-ASVD Case	China Kadoorie Biobank RC36	EAS	201	0.54	55.2	55.8602	54.5926	Non-fasting	No	No	No	47	49.2149	45.1615	93.4	Measured	90.4379	96.0233	143.68	138.749	148.066	182.4	181.25	183.332	Affymetrix Axiom CKB_1	Impute4	1KGP3	rvtests
CKB36-Control	China Kadoorie Biobank RC36	EAS	276	0.5	59.2	59.8333	58.5942	Non-fasting	No	No	No	50	51.1145	48.8615	89	Measured	91.8328	86.1528	118.244	122.321	114.303	175.7	182.595	168.811	Affymetrix Axiom CKB_1	Impute4	1KGP3	rvtests
CKB36-HS Case	China Kadoorie Biobank RC36	EAS	212	0.47	60.7	60.9558	60.3939	Non-fasting	No	No	No	50.1	50.0451	50.0601	89.3	Measured	92.4247	85.7419	125.689	133.538	117.291	177.7	183.262	171.281	Affymetrix Axiom CKB_1	Impute4	1KGP3	rvtests
CKB46-ASVD Case	China Kadoorie Biobank RC46	EAS	395	0.54	56.3	56.1111	56.4977	Non-fasting	No	No	No	46	48.7328	43.7744	111.5	Measured	113.254	110.048	167.961	163.539	171.755	202.7	207.66	198.571	Affymetrix Axiom CKB_1	Impute4	1KGP3	rvtests
CKB46-Control	China Kadoorie Biobank RC46	EAS	278	0.58	59.1	58.0085	59.9562	Non-fasting	No	No	No	47.3	50.5463	44.9708	103.9	Measured	108.076	100.832	144.259	142.133	145.847	191.5	199.557	185.572	Affymetrix Axiom CKB_1	Impute4	1KGP3	rvtests
CKB46-HS Case	China Kadoorie Biobank RC46	EAS	218	0.59	59.9	59.2921	60.3333	Non-fasting	No	No	No	47.3	50.0711	45.4597	97.9	Measured	103.362	94.1899	141.781	129.674	150.787	183.9	192.372	178.008	Affymetrix Axiom CKB_1	Impute4	1KGP3	rvtests
CKB52-ASVD Case	China Kadoorie Biobank RC52	EAS	239	0.47	55.6	55.9603	55.1239	Non-fasting	No	No	No	52.6	52.5666	52.6733	91	Measured	97.2612	83.9995	150.706	168.602	132.982	183.5	193.46	172.492	Affymetrix Axiom CKB_1	Impute4	1KGP3	rvtests
CKB52-Control	China Kadoorie Biobank RC52	EAS	720	0.53	60.9	60.6834	61.0026	Non-fasting	No	No	No	54.3	54.1254	54.4953	88.2	Measured	90.9168	85.818	127.824	142.25	116.285	178.7	185.305	172.831	Affymetrix Axiom CKB_1	Impute4	1KGP3	rvtests
CKB52-HS Case	China Kadoorie Biobank RC52	EAS	593	0.51	61	60.7304	61.3233	Non-fasting	No	No	No	54.5	53.4359	55.6242	87.4	Measured	90.8098	84.0093	135.187	144.827	126.392	179.6	184.266	175.031	Affymetrix Axiom CKB_1	Impute4	1KGP3	rvtests
CKB58-ASVD Case	China Kadoorie Biobank RC58	EAS	839	0.43	50.6	49.9811	51.3481	Non-fasting	No	No	No	45.8	47.479	43.6939	80.7	Measured	80.9038	80.5126	156.573	168.067	142.618	165.5	169.833	159.712	Affymetrix Axiom CKB_1	Impute4	1KGP3	rvtests
CKB58-Control	China Kadoorie Biobank RC58	EAS	1273	0.43	57.4	56.2979	58.9708	Non-fasting	No	No	No	47.7	49.1664	45.7851	79.2	Measured	81.3803	76.2921	146.64	160.197	130.451	164	170.622	155.298	Affymetrix Axiom CKB_1	Impute4	1KGP3	rvtests
CKB58-HS Case	China Kadoorie Biobank RC58	EAS	1003	0.44	58.5	57.2677	60	Non-fasting	No	No	No	46.6	47.933	44.9294	79.1	Measured	81.5423	75.8822	141.298	153.861	126.653	162.5	168.999	154.159	Affymetrix Axiom CKB_1	Impute4	1KGP3	rvtests
CKB68-ASVD Case	China Kadoorie Biobank RC68	EAS	1431	0.51	53.1	53.373	52.8884	Non-fasting	No	No	No	43.3	44.1853	42.5109	93.6	Measured	94.8507	92.3563	148.811	160.595	138.197	178	184.212	171.952	Affymetrix Axiom CKB_1	Impute4	1KGP3	rvtests
CKB68-Control	China Kadoorie Biobank RC68	EAS	892	0.54	55.3	53.5672	56.824	Non-fasting	No	No	No	44.9	45.5285	44.392	87.7	Measured	90.9133	85.042	132.993	145.352	123.352	171.2	178.9	164.697	Affymetrix Axiom CKB_1	Impute4	1KGP3	rvtests
CKB68-HS Case	China Kadoorie Biobank RC68	EAS	680	0.53	56.9	55.3323	58.3045	Non-fasting	No	No	No	44	44.5534	43.4562	88.4	Measured	92.3745	84.899	133.872	143.623	125.669	171.1	178.382	164.457	Affymetrix Axiom CKB_1	Impute4	1KGP3	rvtests
CKB78-ASVD Case	China Kadoorie Biobank RC78	EAS	374	0.49	56	55.8413	56.173	Non-fasting	No	No	No	50.4	50.8378	50.0076	90.6	Measured	91.5436	89.6266	132.704	139.241	126.343	180.5	183.588	177.389	Affymetrix Axiom CKB_1	Impute4	1KGP3	rvtests
CKB78-Control	China Kadoorie Biobank RC78	EAS	497	0.56	61.1	60.968	61.2698	Non-fasting	No	No	No	50.3	50.0273	50.5019	86.9	Measured	90.1346	84.302	128.05	144.985	116.114	175.2	182.401	169.496	Affymetrix Axiom CKB_1	Impute4	1KGP3	rvtests
CKB78-HS Case	China Kadoorie Biobank RC78	EAS	433	0.58	61.8	61.2772	62.1285	Non-fasting	No	No	No	51.7	50.8153	52.4281	85.7	Measured	88.7203	83.4107	122.892	134.775	114.79	174.9	180.299	170.848	Affymetrix Axiom CKB_1	Impute4	1KGP3	rvtests
CKB88-ASVD Case	China Kadoorie Biobank RC88	EAS	827	0.47	52.2	50.4073	54.3128	Non-fasting	No	No	No	47.7	48.8056	46.5646	90.9	Measured	91.0364	90.6514	166.883	172.383	160.929	182.2	185.582	178.472	Affymetrix Axiom CKB_1	Impute4	1KGP3	rvtests
CKB88-Control	China Kadoorie Biobank RC88	EAS	1401	0.56	57.2	54.5843	59.2982	Non-fasting	No	No	No	49.2	50.1543	48.4026	88.7	Measured	92.3425	85.8534	151.536	161.753	143.821	180.5	188.063	174.397	Affymetrix Axiom CKB_1	Impute4	1KGP3	rvtests
CKB88-HS Case	China Kadoorie Biobank RC88	EAS	1114	0.57	58	55.8675	59.7052	Non-fasting	No	No	No	49.1	50.5936	48.0262	89.8	Measured	92.511	87.7533	149.4	160.83	141.204	180	187.128	174.541	Affymetrix Axiom CKB_1	Impute4	1KGP3	rvtests
CLHNS-Excluded for issues with trait transformation	Cebu Longitudinal Health and Nutrition Survey
CoLaus	Cohorte Lausannoise	EUR	5434	0.47	53.4	53.894	52.938	Fasting	694 individuals	308 individuals	386 individuals	63.3	69.9544	55.9151	129.2	Friedewald	127.004	131.796	123.6	103.262	146.509	216.5	217.507	215.456	Affymetrix 500K	Minimac	HRC and 1KGP3	rvtests
CTMM	CTMM - Circulating Cells	EUR	465	0.46	62.7	NA	62.2	Fasting	Yes	NA	Yes	44	NA	41.7	131.6	Measured	NA	129.2	137.9	NA	139.3	201.5	NA	196.5	Affymetrix Tx array	Impute2	1KGP3	rvtests
Danfund	The Danish study of Functional Disorders	EUR	6799	0.45	52.3	51.82	52.74	Fasting	Unknown	Unknown	Unknown	56.4	61.55	50.13	133.8	Measured	131.93	135.99	110.7	99.75	123.99	212.1	213.32	210.54	Illumina HumanOmniExpress-24v1-0_A and HumanOmniExpress-24v1-1_A	Minimac	HRC and 1KGP3	rvtests	https://pubmed.ncbi.nlm.nih.gov/28275316/
DC-1M	Singapore Diabetic Cohort Study(DC)	EAS	904	0.65	63.5	63.09	63.76	Both	Yes	Yes	Yes	49.2	52.06	47.58	166.51(Non-fasting);121.75(fasting)	Measured	158.02 (Non-fasting); 122.46 (fasting)	175.7 (Non-fasting); 121.7 (fasting)	156.68(Non-fasting); 140.16(fasting)	142.48 (Non-fasting); 162.37 (fasting)	172.3 (Non-fasting); 138.4(fasting)	226.3	235.6	221.29	Illumina 1M duov3	Minimac	1KGP3	rvtests	https://pubmed.ncbi.nlm.nih.gov/21490949/
DC-610	Singapore Diabetic Cohort Study(DC)	EAS	1075	0.37	64.9	65.55	63.71	Both	Yes	Yes	Yes	52.8	56.54	46.41	169.33(Non-fasting);125.45(fasting)	Measured	174.37 (Non-fasting); 125.45 (fasting)	164.2 (Non-fasting)	148.75(Non-fasting);142.08(fasting)	160.11 (Non-fasting); 142.08 (fasting)	137.4 (Non-fasting)	237.3	238.96	234.4	Illumina Human610-Quad Beadchips	Minimac	1KGP3	rvtests	https://pubmed.ncbi.nlm.nih.gov/21490949/
DCS	Hoorn Diabetes Care System Cohort study	EUR	3351	0.56	61.3	62.0097	61.2793	Fasting	Yes	0.456594	0.51601	47.4	51.3223	47.3936	111.4	Friedewald	117.466	111.403	167.5	165.82	167.505	190.4	200.148	190.352	Illumina HumanCoreExome	Minimac	HRC and 1KGP3	rvtests	https://pubmed.ncbi.nlm.nih.gov/28588112/
DECODE	deCODE antropometric study	EUR	137772	0.49	58.5	58.4	58.7	Fasting	20.3% of individuals	17.6% of individuals	23.1% of individuals	54.5	60.6	48.8	141.1	Friedewald	143.2	139.2	142.2	132.6	151.3	222	228.5	215.8	Illumina HumanHap and Omni	deCode's long-range phasing and imputation pipeline	DECODE	deCode association software	https://pubmed.ncbi.nlm.nih.gov/27135400/
DGI	Diabetes Genetics Initiative of Broad Institute of Harvard and MIT, Lund University, and Novartis Institutes of BioMedical Research	EUR	2246	0.51	61.5	62.08	60.93	NA	NA	NA	NA	47.1	50.93	43.5	154.1	NA	157.31	161.7	147.8	142.85	152.45	227.1	233.5	221.09	Affymetrix 500K	Minimac	HRC and 1KGP3	rvtests
DIACORE	DIAbetes COhoRtE	EUR	1416	0.61	65.4	64.9159	65.7879	Both	Unknown	Unknown	Unknown	52.8	58.04	49.45	114.32 (Non-fasting); 119.26 (fasting)	NA	124.13 (Non-fasting); 127.35 (fasting)	108.03 (Non-fasting); 113.97 (fasting)	190.74 (Non-fasting); 160.70 (fasting)	189.05 (Non-fasting); 150.19 (fasting)	191.82 (Non-fasting); 167.59 (fasting)	201.9	214.25	193.94	Axiom UK Biobank Array	Minimac	1KGP3	rvtests	https://pubmed.ncbi.nlm.nih.gov/23409726/
DiscovEHR	DiscovEHR	EUR	21420	0.45	52.3	50.5	54.4	Fasting	NA	NA	NA	51.2	56.29	45.2	114	Measured	114.9	113	150.9	139.9	164.5	195.3	199	190.8	Illumina Human OmniExpress Exome Chip	Minimac	HRC	rvtests
eMERGE	Electronic Medical Records and Genomics	AdmAFR	2094	0.33	51.9	50.98	53.63	NA	NA	NA	NA	51.8	54.13	46.48	103.4	NA	103.95	102.27	116.5	113.22	123.12	174.2	177.47	167.38	Affymetrix: 6.0, AffyAxiom, Immunina: OmniExpress, Omni1-5	Minimac	HRC	rvtests	https://pubmed.ncbi.nlm.nih.gov/25414722/; https://pubmed.ncbi.nlm.nih.gov/24956226/; https://pubmed.ncbi.nlm.nih.gov/3978763/
eMERGE Adults	Electronic Medical Records and Genomics	EUR	25086	0.48	61.4	62.3	62.94	NA	NA	NA	NA	56.3	61.47	50.67	115.2	NA	113.64	116.9	155	153.32	156.7	158	169.93	144.79	Affymetrix: 6.0, AffyAxiom, Immunina: OmniExpress, Omni1-5	Minimac	HRC	rvtests	https://pubmed.ncbi.nlm.nih.gov/25414722/; https://pubmed.ncbi.nlm.nih.gov/24956226/; https://pubmed.ncbi.nlm.nih.gov/3978763/
eMERGE Children	Electronic Medical Records and Genomics	EUR	990	0.6	10.4	11.67	11.44	NA	NA	NA	NA	41.4	11.52	40.69	119.8	NA	121.58	118.55	58.5	54.87	61.08	195.9	197.92	194.57	Affymetrix: 6.0, AffyAxiom, Immunina: OmniExpress, Omni1-5	Minimac	HRC	rvtests	https://pubmed.ncbi.nlm.nih.gov/25414722/; https://pubmed.ncbi.nlm.nih.gov/24956226/; https://pubmed.ncbi.nlm.nih.gov/3978763/
EPICPotsdam	European Investigation into Cancer and Nutrition, Potsdam study	EUR	1306	0.37	50	48.8282	52.1533	15% Fasting	33 individuals	18 individuals	15 individuals	56.3	59.762	50.242	123.2	Friedewald	119.391	129.936	128.9	108.527	163.882	205	200.913	212.089	InfiniumOmniExpressExome-8v1-3	PBWT (Sanger Server)	HRC and 1KGP3	rvtests	https://pubmed.ncbi.nlm.nih.gov/10592368/
EpiHealth	Epidemiology for Health	EUR	2000	0.48	61.3	61.38	61.25	Fasting	No	No	No	59.1	65.11	52.55	156	Friedewald	156.13	155.83	111.3	102.13	121.26	235.4	240	230.36	Illumina HumanCoreExome	Minimac	HRC and 1KGP3	rvtests	https://pubmed.ncbi.nlm.nih.gov/23435790/
EPOZ	Epidemiologisch Preventief Onderzoek Zoetermeer	EUR	416	0.46	51	51.1323	50.7947	NA	NA	NA	NA	NA	NA	NA	NA	NA	NA	NA	NA	NA	NA	233.7	235.47	231.6	GSA	Minimac	HRC and 1KGP3	rvtests
ERF	Erasmus Rucphen Family Study	EUR	2762	0.45	48.9	48.38	49.65	Fasting	355 individuals	171 individuals	184 individuals	49.3	53.74	43.76	150.4	Measured	149.2	151.91	120.6	109.91	133.88	221.3	222.69	219.58	Illumina 318K, Illumina 370K and Affymetrix 250K	Minimac	HRC	rvtests	https://pubmed.ncbi.nlm.nih.gov/18839131/; https://pubmed.ncbi.nlm.nih.gov/17318336/
EUGENDA	European Genetic Database	EUR	1959	0.41	73.8	73.83	73.66	Non-fasting	NA	NA	NA	57.1	61.7175	50.5507	134.5	Friedewald	142.633	122.955	162.4	159.765	166.125	223.7	236.137	205.998	Illumina HumanCoreExome with custom content	Minimac	HRC and 1KGP3	rvtests	https://pubmed.ncbi.nlm.nih.gov/26691988/; https://pubmed.ncbi.nlm.nih.gov/26641553/
EURAC (CHRIS)	Cooperative Health Research In South Tyrol	EUR	4347	0.45	46.2	45.9	46.5	Fasting	263 individuals	118 individuals	145 individuals	65.7	71.7	58.3	136.2	Measured	133.7	139.4	101.4	91.7	113.4	214.2	216.1	211.8	Illumina HumanOmniExpressExome	Minimac	HRC and 1KGP3	rvtests	https://pubmed.ncbi.nlm.nih.gov/26541195/
EXTEND	EXTEND	EUR	7627	0.39	56.4	54.92	58.34	NA	1637 individuals	644 individuals	993 individuals	66.6	72.0035	57.2703	126.5	NA	125.716	127.959	104.5	95.39	120.19	213.7	216.475	208.741	Not reported	Minimac	HRC and 1KGP3	rvtests
FamHS	Family Heart Study	EUR	3777	0.48	52.1	52.2932	51.8942	Fasting	Yes	Yes	Yes	49.7	55.8424	42.9488	130.3	Measured	128.002	132.829	151	140.707	162.423	209.9	211.918	207.774	Illumina 550K, Illumina 610K, Illumina 1mil	Minimac	HRC and 1KGP3	rvtests	https://pubmed.ncbi.nlm.nih.gov/11713718/
Fenland	Fenland Study	EUR	8933	0.47	48.9	48.91	48.8	Fasting	Yes	Yes	Yes	59.2	65.6	52	133.3	Measured	129.2	137.9	105.2	86.98	125.4	211.5	210.3	212.9	Affymetrix Axiom UKBiobank	PBWT (Sanger Server)	HRC and 1KGP3	rvtests	https://pubmed.ncbi.nlm.nih.gov/28096530/
FHS	Framingham Heart Study	EUR	8086	0.46	40.2	40.2918	40.1723	Fasting	4% of individuals	2.7% of individuals	6.4% of individuals	53.5	60.0985	45.984	120.2	Measured	112.972	128.649	133.9	118.302	151.923	198.8	196.066	201.998	Affymetrix 250K Mapping NspI (AN) and Affymetrix 250K Mapping StyI (AS)	Minimac	HRC and 1KGP3	rvtests	https://pubmed.ncbi.nlm.nih.gov/13751193/; https://pubmed.ncbi.nlm.nih.gov/474565/
FINCAVAS	Finnish Cardiovascular Study	EUR	844	0.57	57.8	58.5895	57.2573	Fasting	354 individuals	116 individuals	238 individuals	55.4	63.4044	49.392	103.8	Measured	108.232	100.597	124.9	117.988	129.948	183.3	194.588	174.883	Illumina HumanCoreExome-12 v1.1	Minimac	HRC and 1KGP3	rvtests	https://pubmed.ncbi.nlm.nih.gov/16515696/
FinnTwin	Finnish Twin Cohort	EUR	1693	0.43	32.5	33.01	31.72	NA	NA	NA	NA	67.4	74.02	58.71	98.5	Friedewald	98.52	98.49	100.6	95.25	107.95	186.6	191.88	179.8	Human670-QuadCustom; Human610-Quad; HumanCoreExome-12v1-0; HumanCoreExome-12v1-1; HumanCoreExome-24v1-0	Minimac	HRC and 1KGP3	rvtests	https://pubmed.ncbi.nlm.nih.gov/23298696/
FINRISK1	FINRISK_MRPRED	EUR	3274	0.52	50.3	48.68	51.8952	Non-fasting	205 individuals	80 individuals	125 individuals	52.6	58.0077	47.5019	133.9	Friedewald	130.9	136.753	139.4	115.432	161.952	213.5	211.532	215.384	Illumina Human CoreExome	IMPUTE2	SISu	rvtests
FINRISK2	FINRISK_ENGAGE	EUR	5457	0.45	46	45.2963	46.8642	Non-fasting	178 individuals	65 individuals	113 individuals	57.2	61.9543	51.3819	134.2	Friedewald	130.774	138.459	124.5	110.139	141.957	215.8	214.504	217.37	Illumina Human CoreExome	IMPUTE2	SISu	rvtests
FINRISK3	FINRISK_COROGENE	EUR	1766	0.53	55	56.2822	53.7978	Non-fasting	177 individuals	69 individuals	108 individuals	56	61.7565	50.8114	132.3	Friedewald	130.986	133.481	131.8	115.481	146.362	213.9	215.35	212.654	HumanHap 610K	IMPUTE2	SISu	rvtests
FINRISK4	FINRISK_PREDICTCVD_SUMMIT	EUR	2415	0.6	53.1	53.2379	53.0515	Non-fasting	NA	108 individuals	166 individuals	51.2	57.3985	47.0445	137.8	Friedewald	136.332	138.816	158.2	137.286	172.291	219.5	220.218	219.054	Illumina Human OmniExpress	IMPUTE2	SISu	rvtests
FINRISK5	FINRISK_PalotieCoreExome	EUR	3442	0.43	46.2	45.6914	46.8175	Non-fasting	191 individuals	90 individuals	101 individuals	57.9	62.9581	51.3176	130.3	Friedewald	125.72	136.545	122	103.78	145.94	212.3	209.325	216.17	Illumina Human CoreExome	IMPUTE2	SISu	rvtests
FINRISK6	FINRISK_COREEX_FINPCGA	EUR	7397	0.43	46.3	46.1282	46.5048	Non-fasting	499 individuals	229 individuals	270 individuals	55.7	60.0346	49.9348	129.1	Friedewald	126.927	132.082	125.3	107.701	148.17	209.4	208.203	210.982	Illumina Human CoreExome	IMPUTE2	SISu	rvtests
FINRISK7	FINRISK_FR_2012	EUR	3438	0.5	54.7	54.1638	55.2527	Fasting	679 individuals	NA	382 individuals	57.1	62.7603	51.3887	123.8	Friedewald	125.831	121.847	127.3	112.353	142.226	206.2	210.888	201.461	Illumina Human CoreExome	IMPUTE2	SISu	rvtests
FUSION	Finland-United States Investigation of NIDDM Genetics	EUR	2188	0.53	63.1	63.5958	62.6779	Fasting	21% of individuals	23.5% of individuals	19.1% of individuals	51.9	57.3031	47.0906	150.9	Friedewald	154.273	147.799	159.1	147.946	169.087	234.4	241.436	228.065	Illumina Infinium II HumanHap300 BeadChip	Minimac	HRC and 1KGP3	rvtests	https://pubmed.ncbi.nlm.nih.gov/17463248/
FVG	INGI-FVG	EUR	1341	0.42	51.5	51.6519	51.3776	NA	NA	NA	NA	53.6	56.5162	49.5586	144.5	Friedewald	146.398	141.827	115.1	104.662	129.67	221.5	224.118	217.74	Illumina OmniExpress	Minimac	HRC and 1KGP3	rvtests	https://pubmed.ncbi.nlm.nih.gov/23249956/
GCKD	German Chronic Kidney Disease Study	EUR	4988	0.6	60.08	58.85	60.89	Non-fasting	51% of individuals	42.6% of individuals	56.6% of individuals	52	59.95	46.78	118.4	Measured	125.85	113.49	198.9	178.6	212.4	211.3	222.87	203.64	Omni2.5Exome BeadChip array	Minimac	HRC and 1KGP3	rvtests	https://pubmed.ncbi.nlm.nih.gov/25271006/
GENERISK	GENERISK	EUR	4697	0.36	57	56.9723	57.1343	Fasting	515 individuals	277 individuals	238 individuals	63.9	69.0359	54.9443	133.5	Friedewald	131.12	137.888	113.6	101.793	134.284	225.7	225.358	226.19	Illumina Human CoreExome	IMPUTE2	SISu	rvtests
Genie UK	Diabetic Nephropathy Collaborative Research Initiative	EUR	904	0.53	45.3	43.7099	46.7443	NA	NA	NA	NA	66.3	74.5164	59.1868	110.4	NA	107.797	112.651	140	116.282	160.924	204.7	205.827	203.791	Infinium CoreExome	Minimac	1KGP3	rvtests	https://pubmed.ncbi.nlm.nih.gov/23028342/
GENOA	Genetic Epidemiology Network of Arteriopathy	EUR	1271	0.44	55.5	55.2919	55.7298	Fasting	18% of individuals	13.9% of individuals	23.7% of individuals	51.3	57.0868	44.0788	129.6	Friedewald	125.3	135.035	188.7	184.139	194.377	218.8	219.714	217.644	Affymetrix 6.0	Minimac	HRC and 1KGP3	rvtests	https://pubmed.ncbi.nlm.nih.gov/11799070/; https://pubmed.ncbi.nlm.nih.gov/15121494/
GerMIFS1	German MI Family Study I	EUR	584	0.66	59	60.1	58.05	NA	NA	NA	NA	51	56.78	47.97	NA	NA	NA	NA	199.8	180.45	209.76	199.8	232.47	228.82	Affymetrix Mapping 500K	Minimac	HRC	rvtests
GerMIFS2	German MI Family Study II	EUR	820	0.65	51.2	51.22	51.22	NA	NA	NA	NA	56.4	65.05	51.65	NA	NA	NA	NA	158.5	135.41	170.93	212.2	211.88	212.32	Affymetrix Genome-Wide Human SNP Array 6.0	Minimac	HRC	rvtests
GerMIFS5	German MI Family Study V	EUR	3632	0.65	59.7	59.36	59.85	NA	NA	NA	NA	52.9	61.54	48.04	NA	NA	NA	NA	NA	NA	NA	214.3	218.72	211.93	Affymetrix Genome-Wide Human SNP Array 6.0	Minimac	HRC	rvtests
GLACIERV2	Gene-Lifestyle Interactions and Complex Traits Involved in Elevated Disease Risk-V2	EUR	5090	0.39	53.3	52.92	53.81	Fasting	199 individuals	103 individuals	96 individuals	54.2	58.23	48.05	153.5	Friedewald	152.11	155.68	125.4	116.03	140.16	221.1	221.27	220.7	InfiniumCoreExome-24v1-1	Minimac	HRC and 1KGP3	rvtests	https://pubmed.ncbi.nlm.nih.gov/25396097/
GoDARTS	Genetics of Diabetes Audit and Research in Tayside Scotland	EUR	2644	0.54	66.97	67.8638	66.2176	Fasting	NA	NA	NA	48.45	50.9623	46.2797	132.32	NA	139.294	126.108	257.45	251.764	262.339	119.39	304.94	284.79	Affymetrix 6.0/Illumina omni-express	Minimac	HRC and 1KGP3	rvtests	https://pubmed.ncbi.nlm.nih.gov/29025058/
GOLDN	GOLDN	EUR	801	0.49	48.4	48.59	48.19	Fasting	Yes	Yes	Yes	46.5	51.98	40.94	135.4	Measured	133.45	137.42	142.6	128.37	157.21	203.3	204.12	202.41	Affymetrix Genome-Wide Human SNP Array 6.0	Minimac	HRC and 1KGP3	rvtests	https://pubmed.ncbi.nlm.nih.gov/26256467/
GOMAP	Genetic Overlap between Metabolic and Psychiatric traits	EUR	1528	0.58	55.8	58.3055	54.0324	NA	NA	NA	NA	53.7	59.5008	49.5395	117.6	Both	121.334	114.99	124.5	123.532	125.123	193.6	202.691	187.047	Illumina HumanCoreExome	Minimac	HRC and 1KGP3	rvtests
GRAPHIC	Genetic Regulation of Arterial Pressure In humans in the Community	EUR	1005	0.5	52.9	51.89	53.83	NA	NA	NA	NA	57.3	63.4	51	126.1	Measured	126.1	125.8	164.1	142	186.3	217.7	219.6	215.8	Illumina HumanOmniExpress-12v1	Minimac	HRC and 1KGP3	rvtests
GRCCDS	Genomic Research Cohorts for CCMB Diabetes Study	SAS	2236	0.51	41.2	38.3755	43.9915	Fasting	No	No	No	18.9	20.792	17.0595	93.4	Friedewald	93.8237	93.0266	113.9	101.795	125.623	157.6	158.409	156.848	Affymetrix 6.0	Minimac	1KGP3	rvtests
GRMIC	Greek Recurrent Myocardial Infarction Cohort	EUR	173	0.83	60.2	63.5	59.5067	Fasting	22 individuals	6 individuals	16 individuals	34.7	41.6	33.2448	108.5	Measured	93.5667	111.58	149.3	147.367	149.713	173	164.6	174.72	Illumina Human Core Exome	Minimac	HRC and 1KGP3	rvtests
GS20K	Generation Scotland	EUR	20395	0.42	47.6	47.77	47.42	NA	Yes	Yes	Yes	56.7	61.3306	50.0776	NA	NA	NA	NA	NA	NA	NA	202.7	199.924	199.808	HumanOmniExpressExome8v1-2_A, HumanOmniExpressExome-8v1_A	PBWT	HRC	rvtests	https://pubmed.ncbi.nlm.nih.gov/22786799/
HABC	Health Aging and Body Composition	AdmAFR	1116	0.43	73.4	73.364	73.524	NA	NA	NA	NA	57.2	61.322	51.5779	124	Measured	127.915	118.776	119.4	122.759	115.276	210.6	219.75	198.476	Illumina Human1M-Duov3_B	Minimac	CAAPA	rvtests
HABC	Health Aging and Body Composition	EUR	1608	0.53	73.8	73.636	73.905	NA	NA	NA	NA	51.9	59.293	45.2827	119.6	Measured	122.122	117.26	153.1	156.632	149.75	209.1	220.853	198.561	Illumina Human1M-Duov3_B	Minimac	HRC	rvtests
HANDLS	Healthy Aging in Neighborhoods of Diversity across the Life Span	AdmAFR	989	0.44	48.5	48.426	48.595	Fasting	116 individuals	70 individuals	46 individuals	55.2	57.537	52.164	112.7	Friedewald	113.534	111.67	105.8	101.087	111.821	189.3	191.319	186.733	Illimina 1M and Illumina 1M-Duo	Minimac	1KGP3	rvtests	https://pubmed.ncbi.nlm.nih.gov/20828101/
HCHS/SOL	Hispanic Community Health Study/Study of Latinos	HIS	12308	0.41	46.1	46.69	45.25	Fasting	12% of individuals	12.3% of individuals	11.3% of individuals	49.1	52.13	44.71	122.8	Friedewald	122.76	122.95	140.2	127.87	157.74	199.4	200.41	198.07	HumanOmni2.5-8v1-1 with custom content	IMPUTE2	1KGP3	rvtests	https://pubmed.ncbi.nlm.nih.gov/20609343/; https://pubmed.ncbi.nlm.nih.gov/26748518/
HCS	Hunter Community Study	EUR	2112	0.5	66.3	65.8189	66.7936	Non-fasting	646 individuals	296 individuals	350 individuals	52	57.5933	46.3824	119.2	Measured	124.663	113.506	122.9	116.407	129.349	208.3	217.792	198.835	Affymetrix Kaiser Axiom	Minimac	HRC	rvtests
Health2006	Health2006	EUR	2981	0.44	49.6	48.93	50.36	Fasting	NA	NA	NA	59.8	65.06	53.19	128.9	Friedewald	126.36	132.16	114.2	102.55	128.46	211.3	212.06	210.36	Illumina HumanOmniExpress-24v1-0_A and HumanOmniExpress-24v1-1_A	Minimac	HRC and 1KGP3	rvtests	https://pubmed.ncbi.nlm.nih.gov/23615486/
Health2008	Health2008	EUR	740	0.43	46.9	46.97	46.72	Fasting	NA	NA	NA	56.8	61.51	50.54	128.7	Friedewald	124.01	134.99	117.8	97.11	144.95	208.4	204.73	213.18	Illumina HumanOmniExpress-24v1-0_A and HumanOmniExpress-24v1-1_A	Minimac	HRC and 1KGP3	rvtests	https://pubmed.ncbi.nlm.nih.gov/23022702/
Health2010	Health2010	EUR	1439	0.44	49.3	49.08	49.52	Fasting	NA	NA	NA	59.7	64.83	53.12	128.7	Friedewald	125.89	132.32	106.9	96.99	119.32	200.9	203.12	198.2	Illumina HumanOmniExpress-24v1-0_A and HumanOmniExpress-24v1-1_A	Minimac	HRC and 1KGP3	rvtests	https://pubmed.ncbi.nlm.nih.gov/25113139/
HNR	Hein Nixdorf Recall Study	EUR	2556	0.5	59.7	59.46	59.88	Average of 10 hours since last meal	333 individuals	150 individuals	183 individuals	59	66.24	51.65	145.1	Measured	144.99	145.3	145.8	129.21	164.42	229.4	233.53	225.38	HumanOmniExpress-12v1_H_fwdfwd; HumanOmniExpress-12v1-1_B; HumanOmni1M-Quadv10-H; HumanOmniExpressExome8v1-2_B	Impute2	1KGP3	rvtests	https://pubmed.ncbi.nlm.nih.gov/12177636/
Hoorn	Hoorn study	EUR	580	0.49	70.2	70.4054	69.9225	Fasting	87 individuals	41 individuals	46 individuals	55.1	61.33	48.5377	140.2	Friedewald	147	133.104	132.3	131.36	133.229	221.3	234.18	207.81	Affymetrix Axiom	Minimac	HRC and 1KGP3	rvtests	https://pubmed.ncbi.nlm.nih.gov/8612442/
HRS	Health and Retirement Study	AdmAFR	2743	0.38	62.8	62.7	62.8	NA	52% of individuals	51.6% of individuals	53.3% of individuals	55	57	51.8	NA	NA	NA	NA	NA	NA	NA	216.6	218.4	213.7	Illumina Omni2.5 Beadchip	Minimac	1KGP3	rvtests	https://pubmed.ncbi.nlm.nih.gov/24671021/
HRS	Health and Retirement Study	EUR	11301	0.43	66.9	66.8	67.1	NA	55% of individuals	50.9% of individuals	59.7% of individuals	54.4	58.8	49	NA	NA	NA	NA	NA	NA	NA	219.2	224.2	212.5	Illumina Omni2.5 Beadchip	Minimac	HRC and 1KGP3	rvtests	https://pubmed.ncbi.nlm.nih.gov/24671021/
HUNT	Nord-Trøndelag Health Study	EUR	69345	0.47	48	47.76	48.18	NA	Unknown	Unknown	Unknown	52.8	57.45	47.56	139.7	Friedewald	139.933	139.49	152.7	134.739	172.85	222.5	224.21	220.58	Illumina HumanCoreExome	Minimac	HRC and 1KGP3	rvtests
HyperGen	HyperGEN	EUR	1058	0.59	49.8	50.8658	48.7695	NA	Yes	NA	NA	46.8	52.1596	41.2423	121.8	NA	121.712	121.816	107	157.419	178.961	193.6	204.129	197.127	Affy 5.0	Minimac	HRC and 1KGP3	rvtests
HyperGen_AA	HyperGEN	AdmAFR	1072	0.33	44.1	44.6612	42.8559	NA	Yes	NA	NA	53.3	55.4861	48.7273	119.4	NA	120.663	116.87	107	103.943	113.344	193.6	196.637	187.538	Affy 6.0	Minimac	1KGP3	rvtests
HyperGen-Axiom	Hypertension Genetic Epidemiology Network Axiom chip data	AdmAFR	424	0.46	48.3	48.62	55.66	Fasting	Yes	Yes	Yes	52.9	56.22	48.9	119	Measured	115	124.1	113.9	100	130.8	NA	NA	NA	Affymetrix axiom	Minimac	1KGP3	rvtests	https://pubmed.ncbi.nlm.nih.gov/11799070/
INCHIANTI	Invecchiare in Chianti	EUR	1206	0.44	68.3	69.14	67.19	Fasting	66 individuals	35 individuals	31 individuals	55.9	59.71	51.08	133.6	Measured	140.5	132.9	125.8	120.7	132.1	214.6	224.2	210.1	Illumina Infinium HumanHap550 genotyping chip	Minimac	HRC and 1KGP3	rvtests	https://pubmed.ncbi.nlm.nih.gov/11129752/
INDICO	Indian Diabetes Consortium	SAS	2011	0.55	52.9	52.2705	53.6034	Fasting	Unknown	NA	NA	44.4	48.3657	41.2075	110.1	Measured	114.893	106.363	143.6	141.813	145.312	176	183.803	169.544	Illumina Human610-Quad BeadChips	Minimac	1KGP3	rvtests	https://pubmed.ncbi.nlm.nih.gov/30911093/
Inter99	Inter99	EUR	6170	0.49	46.2	45.84	46.64	Fasting	NA	NA	NA	55.6	60.44	50.55	136.3	Friedewald	130.91	141.96	118.3	101.9	135.47	214.9	211.34	218.58	Illumina HumanOmniExpress-24v1-0_A and HumanOmniExpress-24v1-1_A	Minimac	HRC and 1KGP3	rvtests	https://pubmed.ncbi.nlm.nih.gov/14663300/
JHS	Jackson Heart Study	AdmAFR	1986	0.39	50.2	50.4501	49.7009	Fasting	Yes	Yes	Yes	50.3	53.53	45.19	129.4	Friedewald	126.43	133.99	106.3	97.61	119.76	200.3	199.06	202.19	Affymetrix 6.0	Minimac	1KGP3	rvtests	https://pubmed.ncbi.nlm.nih.gov/16320381/
JoCoOA	The Johnston County Osteoarthritis Project	AdmAFR	565	0.34	58.5	58.69	58.15	NA	NA	NA	NA	NA	NA	NA	NA	NA	NA	NA	NA	NA	NA	209.5	214.36	200.26	Illumina Infinium 1M-Duo	Minimac	1KGP3	rvtests	https://pubmed.ncbi.nlm.nih.gov/17216685/
JoCoOA	The Johnston County Osteoarthritis Project	EUR	1463	0.39	60.7	60.92	60.27	NA	NA	NA	NA	NA	NA	NA	NA	NA	NA	NA	NA	NA	NA	216.6	223.05	206.26	Illumina Infinium 1M-Duo	Minimac	HRC and 1KGP3	rvtests	https://pubmed.ncbi.nlm.nih.gov/17216685/
JPDSC	Japan PGx Data Science Consortium	EAS	2864	0.53	34.7	33.77	35.57	Fasting	No	No	No	63.8	69.83	57.7	106.1	Measured	102.6	109.6	111.7	78.91	140.1	189.8	187.4	191.9	Illumina HumanOmni2.5-8	Minimac	1KGP3	rvtests	https://pubmed.ncbi.nlm.nih.gov/25855068/
Jupiter	Justification for the Use of Statins in Prevention: an Intervention Trial Evaluating Rosuvastatin (JUPITER)	AdmAFR	1688	0.5	66.4	69.3	63.6	NA	NA	NA	NA	52	52	51.9	94.5	Friedewald	100.1	89	123.3	123.4	123.1	171.2	176.9	165.5	Illumina Omni 1M Quad	Minimac	1KGP3	rvtests	https://pubmed.ncbi.nlm.nih.gov/18997196/
KARE	Korea Association REsource	EAS	8840	0.47	52.2	52.61	51.78	Fasting	40 individuals	20 individuals	20 individuals	44.7	45.59	43.63	115.7	Friedewald	116.7	114.5	162.4	148.6	177.9	191.6	191.4	191.7	Affymetrix 5.0	Minimac	1KGP3	rvtests	https://pubmed.ncbi.nlm.nih.gov/19396169/; https://pubmed.ncbi.nlm.nih.gov/21909109/
KNDP-Excluded for imputation-related issues	Korea National Diabetes Program	EAS
KODGP-Excluded as population outlier (only Arabic population received)	Kuwait Obesity Diabetes Genetic Program	Arab living in Kuwait
KORA S3/F3	KORA - Cooperative Health Research in the Region of Augsburg, cohort KORA S3/F3	EUR	4034	0.5	NA	NA	NA	Non-fasting	Yes	Yes	Yes	54.3	60.57	48.14	143.1	Measured	139.2	146.9	174.5	138	210.8	233	231.2	234.9	Illumina Omni 2.5	Minimac	HRC and 1KGP3	rvtests	https://pubmed.ncbi.nlm.nih.gov/16032514/
KORA S4/F4	KORA - Cooperative Health Research in the Region of Augsburg, cohort KORA S4/F4	EUR	2876	0.48	NA	NA	NA	Fasting	Yes	Yes	Yes	56.1	61.31	50.4	142.7	Measured	140.5	145.1	124.8	108.6	142.1	222.7	224.6	220.6	Affymetrix Axiom	Minimac	HRC and 1KGP3	rvtests	https://pubmed.ncbi.nlm.nih.gov/16032514/
KORCULA	CROATIA-Korčula	EUR	2686	0.36	53.9	53.27	55.06	Fasting	Yes	Yes	Yes	56.7	59.89	51.24	144.5	Measured	145.61	142.48	127	115.44	147.16	225.9	227.9	222.38	Illumina HumanHap 370CNV DUO/QUAD Phase 1	PBWT	HRC	rvtests	https://pubmed.ncbi.nlm.nih.gov/19260141/
KSCS	Kangbuk Samsung Cohort Study	EAS	2062	0.56	39.3	38.6	39.9	Fasting	2% of individuals	NA	NA	59.7	66.8	54.1	114.8	NA	106.21	121.62	108.5	80.6	130.5	192.8	187.2	197.3	Illumina HumanCore BeadChips 12v	IMPUTE2	1KGP3	rvtests	https://pubmed.ncbi.nlm.nih.gov/26857595/
LBR	Leicester BIORESOURCE	EUR	1604	0.54	61.4	59.4	62.7	NA	Yes	NA	NA	55.4	63.4	48.7	106.3	NA	114	99.8	141.6	122.8	155.7	173.5	188.1	161.1	Affymetrix UK Biobank Axiom Array R3	Minimac	HRC and 1KGP3	rvtests
LIFE-Adult	LIFE-Adult	EUR	4956	0.48	62.6	61.932	63.279	Fasting	Yes	Yes	Yes	62.9	69.896	55.434	137.4	Measured	140.01	134.66	124.7	113.21	136.85	220.2	228.67	211.27	Affymetrix Axiom CEU	IMPUTE2	1KGP3	rvtests	https://pubmed.ncbi.nlm.nih.gov/26197779/
Living biobank-CHS	Living-biobank-Chinese	EAS	1266	0.5	35.5	35.54	35.52	Both fasting and non-fasting	Yes	Yes	Yes	51.7	56.89	46.64	121.52 non-fasting; 122.74 fasting	Measured	117.47 (Non-fasting); 117.38 (fasting)	125.56 (Non-fasting); 128.05 (fasting)	124.8 non-fasting; 92.3 fasting	95.07 (Non-fasting); 78.07 (fasting)	154.54 (Non-fasting); 106.37 (fasting)	197.7	195.08	200.29	Illumina Omniexpress	Minimac	1KGP3	rvtests	https://pubmed.ncbi.nlm.nih.gov/2348145/;https://pubmed.ncbi.nlm.nih.gov/10333940/;https://pubmed.ncbi.nlm.nih.gov/9328546/; https://pubmed.ncbi.nlm.nih.gov/11693972/; https://pubmed.ncbi.nlm.nih.gov/25884916/
Living biobank-MAS	Living-biobank-Malay	EAS	1199	0.5	37.2	35.04	39.38	Both fasting and non-fasting	Yes	Yes	Yes	44.5	48.22	40.71	138.1 non-fasting; 136.71 fasting	Measured	136.56(Non-fasting); 130.94 (fasting)	139.49 (Non-fasting); 142.59 (fasting)	144.64 non-fasting; 105.96 fasting	123.89 (Non-fasting); 86.17 (fasting)	163.48 (Non-fasting); 126.13 (fasting)	209.1	204.24	213.94	Illumina Omniexpress	Minimac	1KGP3	rvtests	https://pubmed.ncbi.nlm.nih.gov/2348145/;https://pubmed.ncbi.nlm.nih.gov/10333940/;https://pubmed.ncbi.nlm.nih.gov/9328546/; https://pubmed.ncbi.nlm.nih.gov/11693972/
LLFS	Long Life Family Study	EUR	4459	0.45	70.3	69.9443	70.6716	Both fasting and non-fasting	Yes	Yes	Yes	58.9	64.2053	52.478	136.09 fasting; 129.05 non-fasting	Friedewald	131.84 (Non-fasting); 139.59 (fasting)	125.6 (Non-fasting); 131.82 (fasting)	112.27 fasting; 126.68 non-fasting	120.92 (Non-fasting); 108.23 (fasting)	133.69 (Non-fasting); 117.16 (fasting)	217.4	225.561	207.435	Illumina Omni 2.5	Minimac	HRC and 1KGP3	rvtests	https://pubmed.ncbi.nlm.nih.gov/21258136/
LOLIPOP-EW610	London Life Sciences Prespective Population Study	EUR	927	0.73	56	55.7	56.1	Fasting	11% of individuals	9.2% of individuals	12.2% of individuals	54.9	64.2	51.4	139.3	Measured	138	139.8	136.8	118.7	143.5	220.8	225.2	219.2	Illumina Human610	Minimac	HRC and 1KGP3	rvtests	https://pubmed.ncbi.nlm.nih.gov/21909110/; https://pubmed.ncbi.nlm.nih.gov/21909115/
LOLIPOP-EWA	London Life Sciences Prespective Population Study	EUR	582	0.87	54.4	53.8	54.5	Fasting	40% of individuals	9.2% of individuals	44.3% of individuals	50.3	57.6	49.2	139.4	Measured	134.5	140.1	150.6	115.3	155.9	219.2	215.4	219.8	Affymetrix 500K	Minimac	HRC and 1KGP3	rvtests	https://pubmed.ncbi.nlm.nih.gov/18940312/
LOLIPOP-EWP	London Life Sciences Prespective Population Study	EUR	644	1	55.7	NA	55.7	Fasting	44% of individuals	NA	44.4% of individuals	48.6	NA	48.6	137.4	Measured	NA	137.4	162.4	NA	162.4	218.4	NA	218.4	Perlegen custom	Minimac	HRC and 1KGP3	rvtests	https://pubmed.ncbi.nlm.nih.gov/18193046/
LOLIPOP-IA317	London Life Sciences Prespective Population Study	SAS	2121	1	48.3	NA	48.3	Fasting	12% of individuals	NA	11.9% of individuals	47.6	NA	47.6	135	Measured	NA	135	149.3	NA	149.3	212.3	NA	212.3	Illumina HumanHap300K	Minimac	1KGP3	rvtests	https://pubmed.ncbi.nlm.nih.gov/18454146/
LOLIPOP-IA610-Cases	London Life Sciences Prespective Population Study	SAS	2418	0.83	59.2	61.7	58.7	Fasting	67% of individuals	79.3% of individuals	64.3% of individuals	45.3	52.1	43.9	128.3	Measured	131.1	127.7	158.2	141.2	161.8	207.1	213.7	205.7	Illumina Human610	Minimac	1KGP3	rvtests	https://pubmed.ncbi.nlm.nih.gov/19820698/; https://pubmed.ncbi.nlm.nih.gov/19651812/
LOLIPOP-IA610-Controls	London Life Sciences Prespective Population Study	SAS	4130	0.85	53.1	53.7	53	Fasting	16% of individuals	19.3% of individuals	14.8% of individuals	47.4	53.7	46.3	133.5	Measured	136.8	132.9	162.6	130.9	168.2	212.5	216.7	211.7	Illumina Human610	Minimac	1KGP3	rvtests	https://pubmed.ncbi.nlm.nih.gov/19820698/; https://pubmed.ncbi.nlm.nih.gov/19651812/
LOLIPOP-OmniEE	London Life Sciences Prespective Population Study	SAS	830	0.5	49.7	50.8	48.6	Fasting	6% of individuals	8.2% of individuals	4.1% of individuals	49.9	53.1	46.7	128.3	Measured	126	130.7	147.3	122.9	171.5	203.8	203.5	209.8	OmniExpressExome BeadChip	Minimac	1KGP3	rvtests	https://pubmed.ncbi.nlm.nih.gov/23222517/
LURIC-Cases	Ludwigshafen Risk and Cardiovascular Health Study	EUR	2329	0.75	63.9	66.22	63.08	Fasting	57% of individuals	54.7% of individuals	57.7% of individuals	37.5	41.65	36.12	115.6	Measured	123.7	112.86	175.8	176.55	175.5	191	201.91	187.28	Affymetrix 6.0 + Illumina 200k Metabochip	Minimac	HRC	rvtests	https://pubmed.ncbi.nlm.nih.gov/11258203/
LURIC-Controls	Ludwigshafen Risk and Cardiovascular Health Study	EUR	610	0.53	58.3	61.94	55.05	Fasting	19% of individuals	24.6% of individuals	14% of individuals	42.5	46.01	39.33	120.2	Measured	123.02	117.66	163.1	151.08	173.82	198.5	201.79	195.51	Affymetrix 6.0 + Illumina 200k Metabochip	Minimac	HRC	rvtests	https://pubmed.ncbi.nlm.nih.gov/11258203/
MANOLIS (HELIC-MANOLIS)	Hellenic Isolated Cohorts MANOLIS	EUR	1215	0.43	62.1	63.607	60.0618	NA	NA	NA	NA	49.4	53.2355	44.2428	126.6	Both	123.961	130.15	141.9	132.66	154.052	194.5	191.683	198.271	Illumina OmniExpress & HumanExome	Minimac	HRC and 1KGP3	rvtests	https://www.helic.org
MC1	Mexico City sample 1	HIS	1286	0.36	50.5	50.28	50.99	Fasting	Yes	Yes	Yes	46	48.02	42.44	140.6	Measured	142.93	136.53	212.7	205.78	224.79	219.5	223.47	212.5	Affymetrix 5.0	PBWT	1KGP3	rvtests
MC2	Mexico City sample 2	HIS	1782	0.5	52.8	53.81	51.76	Fasting	Yes	Yes	Yes	45.2	49.09	41.29	141	Measured	146.51	135.55	174.8	172.23	177.3	199.7	208.45	190.84	Affymetrix Axiom LAT	PBWT	1KGP3	rvtests
MESA	Multi-ancestry Study of Atherosclerosis	EAS	774	0.49	62.4	62.37	62.5	Fasting	NA	NA	NA	49.3	52.96	45.56	121.5	Friedewald	121.24	121.69	143.1	144.15	142.04	199	202.73	195.17	Affymetrix 6.0	Minimac	1KGP3	rvtests
MESA	Multi-ancestry Study of Atherosclerosis	HIS	1496	0.48	61.4	61.64	61.13	Fasting	NA	NA	NA	47.5	52.28	42.34	126.1	Friedewald	126.94	125.26	158.5	153.23	164.27	204.8	209.76	199.4	Affymetrix 6.0	Minimac	1KGP3	rvtests
MESA	Multi-ancestry Study of Atherosclerosis	AdmAFR	1643	0.46	62.3	62.2	62.45	Fasting	NA	NA	NA	52.4	57.19	46.81	123.9	Friedewald	126.79	120.4	104.7	101.22	108.86	197.1	204.11	188.86	Affymetrix 6.0	Minimac	1KGP3	rvtests	https://pubmed.ncbi.nlm.nih.gov/12397006/
MESA	Multi-ancestry Study of Atherosclerosis	EUR	2674	0.48	62.7	62.66	62.8	Fasting	NA	NA	NA	52.5	58.98	45.39	125.6	Friedewald	125.38	125.74	131.9	130.54	133.48	204.3	210.51	197.46	Affymetrix 6.0	Minimac	HRC	rvtests	https://pubmed.ncbi.nlm.nih.gov/12397006/
METSIM	Metabolic Syndrome in Men	EUR	10037	1	57.7	NA	57.65	Fasting	28% of individuals	NA	28.2% of individuals	55.5	NA	55.52	140.5	Measured	NA	140.5	130.1	NA	130.1	217.6	NA	217.6	Illumina OmniExpress	Minimac	HRC and 1KGP3	rvtests	https://pubmed.ncbi.nlm.nih.gov/28119442/
MexHTG	Mexican Hypertriglyceridemia	HIS	1705	0.52	40.3	41.26	39.41	Fasting	58 individuals	22 individuals	36 individuals	44.4	47.83	41.3	121.4	Friedewald	119.7	123.2	200.6	185.6	214.4	202.5	202.1	202.9	Illumina Human 610 Quad v1 BeadChip	Minimac	1KGP3	rvtests	https://pubmed.ncbi.nlm.nih.gov/23505323/
MGI	Michigan Genomics Initiative	EUR	10994	0.44	55.9	53.9855	58.3229	Unknown	NA	NA	NA	52.7	58.1409	45.876	110.5	Measured	112.077	108.63	137	128.954	147.212	190.5	195.789	183.931	SemiCustom Illumina HumanCoreExome v12.1	Minimac	HRC and 1KGP3	rvtests
MHIB	Montreal Heart Institute Biobank	EUR	3313	0.73	65.1	63.031	65.8175	Non-fasting	Yes	Yes	Yes	47.4	56.1529	44.1634	107.5	Measured	115.813	104.332	179	174.903	180.533	178.1	197.618	170.833	MEGA	Minimac	HRC and 1KGP3	rvtests	https://pubmed.ncbi.nlm.nih.gov/22923420/
MIGEN	Myocardial Infarction Genetics Consortium	EUR	5210	0.77	42.7	46.53	41.53	Fasting	350 individuals	133 individuals	217 individuals	46.7	53.99	44.28	147.8	Friedewald	136.92	151.43	158.8	153.527	160.41	208.9	204.3	210.28	Affymetrix 6.0	Minimac	HRC and 1KGP3	rvtests	https://pubmed.ncbi.nlm.nih.gov/19198609/
MrOS Sweden	Osteoporosis Fractures in Men, The Gothenburg Study	EUR	943	1	75.3	NA	75.25	Fasting	198 individuals	NA	198 individuals	48.9	NA	48.92	135.5	Measured	NA	135.345	128.7	NA	128.4	219	NA	218.9	Illumina HumanOmni1_Quad_v1-0 B array	PBWT	HRC and 1KGP3	rvtests	https://pubmed.ncbi.nlm.nih.gov/16598372/
MVP	Million Veteran Project	HIS	22302	0.92	53.3	43.14	54.21	NA	NA	NA	NA	36.1	45.33	35.22	140.5	Measured	138.6	140.7	282.6	207.8	289.4	222.5	222.3	222.5	MVP Genotyping Array v1.0	Minimac	1KGP3	rvtests	https://pubmed.ncbi.nlm.nih.gov/26441289/
MVP	Million Veteran Project	AdmAFR	62022	0.87	54.7	46.78	55.86	NA	NA	NA	NA	38.9	46.83	37.73	141.9	Measured	139.7	142.2	226.2	161.3	235.5	220.7	220.5	220.7	MVP Genotyping Array v1.0	Minimac	1KGP3	rvtests	https://pubmed.ncbi.nlm.nih.gov/26441289/
MVP	Million Veteran Project	EUR	225770	0.93	60.8	50.76	61.59	NA	NA	NA	NA	36.1	44.89	35.43	139.1	Measured	148.6	138.4	262.3	224.8	265.1	219	235.2	217.8	MVP Genotyping Array v1.0	Minimac	1KGP3	rvtests	https://pubmed.ncbi.nlm.nih.gov/26441289/
NAFLD	NAFLD study	EUR	443	0.42	45.5	47.1111	43.1915	Fasting	56 individuals	36 individuals	20 individuals	55.4	59.8615	49.2772	123	Measured	120.928	125.868	98.7	92.3605	107.503	198.6	199.783	196.914	Illumina Human Core Exome	Minimac	HRC and 1KGP3	rvtests
Nagahama-2500	the Nagahama Prospective Cohort for Comprehensive Human Bioscience (the Nagahama Study)	EAS	2124	0.32	52.9	51.6	55.3	Fasting	11% of individuals	11% of individuals	9.6% of individuals	65.3	69.3	56.8	123.4	Measured	122.7	124.8	91.4	80.7	113.9	206.8	208.8	202.8	Illumina 2.5M	Minimac	1KGP3	rvtests	https://pubmed.ncbi.nlm.nih.gov/26337002/
Nagahama-610K	the Nagahama Prospective Cohort for Comprehensive Human Bioscience (the Nagahama Study)	EAS	2317	0.34	52.9	51.7	55.2	Non-fasting	11% of individuals	10% of individuals	11% of individuals	65.4	69.3	57.9	123.1	Measured	123.6	124.3	103.1	89	130.1	207.5	209.2	204.4	Illumina 610k	Minimac	1KGP3	rvtests	https://pubmed.ncbi.nlm.nih.gov/26337002/
Nagahama-CoreExome	the Nagahama Prospective Cohort for Comprehensive Human Bioscience (the Nagahama Study)	EAS	4441	0.33	52.9	51.7	55.3	Both fasting and non-fasting	11% of individuals	11% of individuals	11% of individuals	65.3	69.3	57.4	123.3	Measured	122.6	124.5	97.5	85	122.6	207.2	209	203.6	Illumina CoreExome	Minimac	1KGP3	rvtests	https://pubmed.ncbi.nlm.nih.gov/26337002/
NBS	Nijmegen Biomedical Study	EUR	4836	0.46	56.1	53.7	58.8	Non-fasting	10% of individuals	7.2% of individuals	13% of individuals	52.7	NA	47.1	138.5	Measured	141.3	135.3	176.8	162	194.2	223.3	228.1	217.8	Illumina Omniexpress -12 & -24	Minimac	HRC and 1KGP3	rvtests	https://pubmed.ncbi.nlm.nih.gov/28082374/
NEO	The Netherlands Epidemiology of Obesity Study	EUR	5688	0.48	56	55.82	56.15	Fasting	16% of individuals	11.7% of individuals	20.3% of individuals	55.3	61.86	48.22	145.6	Friedewald	145.22	145.95	129.8	114.56	146.22	226.4	229.97	222.63	Illumina HumanCoreExome-24v1_A Beadchip	Minimac	HRC	rvtests	https://pubmed.ncbi.nlm.nih.gov/23576214/
NESDA	Netherlands Study of Depression and Anxiety	EUR	2039	0.33	42	41.25	43.49	Fasting	109 individuals	50 individuals	59 individuals	63.2	67.31	54.75	121.9	Measured	118.28	129.41	112.8	102.66	133.83	198.6	197.34	201.18	Affymetrix-Perlegen, Affymetrix 6.0	Minimac	HRC and 1KGP3	rvtests	https://pubmed.ncbi.nlm.nih.gov/20021996/
NFBC66	Northern Finland Birth Cohort 1966	EUR	5303	0.48	31.2	31.1484	31.1536	NA	NA	NA	NA	61.9	65.5055	54.5194	116	Measured	108.794	124.712	105.9	93.8826	119.014	196.6	191.949	201.605	Illumina HumanCNV370DUO Analysis BeadChip	Minimac	HRC and 1KGP3	rvtests	https://pubmed.ncbi.nlm.nih.gov/2976931/
NHAPC	Nutrition and Health of Aging Population in China	EAS	2894	0.43	58.6	58.4108	58.9424	Fasting	Yes	Yes	Yes	49.2	50.9248	47.0271	130.4	Measured	136.152	122.891	123.3	124.094	122.254	185	191.086	177.011	Illumina 660w	IMPUTE2	1KGP3	rvtests	https://pubmed.ncbi.nlm.nih.gov/17466231/
NhsHpfsAffy	NHS/HPFS Affymetrix	EUR	2992	0.59	62.4	60.17	64.26	Fasting	Yes	Yes	Yes	50.6	59.94	44.39	141.4	Measured	139.73	142.69	139.3	126.81	151.05	220.3	225.23	216.9	Affymetrix 6.0	Minimac	HRC and 1KGP3	rvtests	https://pubmed.ncbi.nlm.nih.gov/28301549/
NhsHpfsPhsOmni	NHS/HPFS/PHS OmniExpress	EUR	1973	0.24	60.7	59.47	64.7	Fasting	Yes	Yes	Yes	57.4	60.09	47.65	141.5	Measured	137.04	148.2	132.7	125.69	145.94	220.4	220.19	221.05	Illumina OmniExpress multiple versions	Minimac	HRC and 1KGP3	rvtests	https://pubmed.ncbi.nlm.nih.gov/28301549/
NhsNhs2HpfsHuco	NHS/NHS2/HPFS HumanCore	EUR	1621	0.29	56.8	53.37	65.13	Fasting	Yes	Yes	Yes	57.1	62.88	46.6	133.9	Measured	128.46	145.38	123.7	118.31	139.76	213.5	211.61	218.14	Illumina HumanCoreEx multiple versions	Minimac	HRC and 1KGP3	rvtests	https://pubmed.ncbi.nlm.nih.gov/28301549/
NhsNhs2HpfsPhsIllu	NHS/NHS2/HPFS/PHS IlluminaHumanHap	EUR	2823	0.2	58.5	57.11	63.98	Fasting	Yes	Yes	Yes	57.8	61.05	47.73	138.6	Measured	133.51	142.71	127.1	123.25	137.76	218.8	218.06	221.93	Illumina HumanHap multiple versions	Minimac	HRC and 1KGP3	rvtests	https://pubmed.ncbi.nlm.nih.gov/28301549/
NhsNhs2HpfsPhsOnco	NHS/NHS2/HPFS/PHS OncoArray	EUR	3054	0.33	55.2	51.08	63.34	Fasting	Yes	Yes	Yes	53.6	62.56	46.65	137.5	Measured	131.76	140.87	114.3	111.49	127.3	212.6	210.19	217.62	Illumina OncoArray	Minimac	HRC and 1KGP3	rvtests	https://pubmed.ncbi.nlm.nih.gov/28301549/
NICOLA	Northern Ireland Cohort for Longitudinal Study of Ageing	EUR	2488	0.48	64.2	63.2697	65.1147	NA	NA	NA	NA	57.9	63.7296	51.5636	111.5	Friedewald	120.541	101.457	152.7	139.38	167.046	199.3	211.921	185.68	Infinium CoreExome-24 v1.1	Minimac	HRC and 1KGP3	rvtests
NorfolkIsland- Excluded for issues with trait transformation	Norfolk Island Cohort
NSHD	National Survey of Health and Development	EUR	2449	0.5	53	53	53	Non-fasting	73 individuals	22 individuals	51 individuals	64.4	70.82	57.36	136.9	Friedewald	135.915	138.018	189.7	160.386	219.176	235.3	237.235	233.322	DrugDev consortium array	Minimac	HRC	rvtests	https://pubmed.ncbi.nlm.nih.gov/16204333/; https://pubmed.ncbi.nlm.nih.gov/21345808/
NTR	Netherlands Twin Register	EUR	8070	0.37	44.2	43.68	45.16	Fasting	583 individuals	288 individuals	295 individuals	54.8	58.74	48.1	118.3	Friedewald	117.12	120.4	118.7	108.87	135.45	196.8	197.57	195.6	Perlegen-Affymetrix, Affymetrix 6.0, Axiom, Illumina 660, 1M, GSA + NTR-GONL	Minimac	HRC and 1KGP3	rvtests	https://pubmed.ncbi.nlm.nih.gov/20477721/
OBB	Oxford Biobank	EUR	7169	0.44	41.61	41.49	41.75	Fasting	NA	NA	NA	53.3	58.61	46.47	127.21	NA	121.1	135.17	101.91	83.48	125.6	200.65	196.27	206.28	Affymetrix Axiom UK Biobank array	Minimac	HRC and 1KGP3	rvtests	https://pubmed.ncbi.nlm.nih.gov/29040543/
OGP	Ogliastra Genetic Park	EUR	1100	0.61	53	51.99	53.699	Fasting	62 individuals	23 individuals	39 individuals	53.6	60.25	49.382	137.9	Measured	138.74	137.315	106.2	81.701	121.563	212.5	215.062	210.945	Affymetrix 500K Gene Chip	Minimac	HRC and 1KGP3	rvtests	https://pubmed.ncbi.nlm.nih.gov/20823129/
ORCADES	Orkney Complex Disease Study	EUR	1421	0.4	53.2	52.91	53.66	Fasting	187 individuals	95 individuals	92 individuals	58.3	62.4	51.95	132	Friedewald	129.77	135.54	98.2	94.13	104.71	209.7	210.31	208.7	Illumina Hap300, Illumina Omni1, Illumina OmniExpress	PBWT	HRC	rvtests	http://www.orcades.ed.ac.uk/orcades/; https://www.mrc.ac.uk/research/facilities-and-resources-for-researchers/cohort-directory/orkney-complex-disease-study-orcades/
PARC	the Pharmacogenomics and Risk of Cardiovascular Disease	EUR	1798	0.7	61.6	62	61.4	Fasting	No	No	No	42	51	38	133	Measured	137	131	177	157	185	214	224	210	Illumina 300K and 610K	Minimac	HRC	rvtests	https://pubmed.ncbi.nlm.nih.gov/16516587/; https://pubmed.ncbi.nlm.nih.gov/11434828/
pcosN	pcosN	EAS	975	0	24.9	24.9	NA	NA	NA	NA	NA	49.7	49.7	NA	110.4	NA	110.4	NA	75.1	75.1	NA	175.1	175.1	NA	NA	Minimac	1KGP3	rvtests
PMBB	Penn Medicine BioBank	AdmAFR	924	0.5	55.5	54.48	56.56	Non-fasting	NA	NA	NA	47.9	51.78	43.35	118.2	Measured	122.8	113.6	115.4	113.2	117.9	206.4	216.4	196.3	Illumina Quad Omni	Minimac	1KGP3	rvtests
PMBB	Penn Medicine BioBank	EUR	2470	0.67	62.7	62.38	62.83	Non-fasting	NA	NA	NA	48.1	56.29	43.02	106.6	Measured	117.4	101.2	129.2	126.8	130.6	197.8	219.1	187.3	Illumina Quad Omni	Minimac	HRC and 1KGP3	rvtests
POMAK (HELIC-Pomak)	Hellenic Isolated Cohorts Pomak	EUR	926	0.29	43.4	41.6815	47.5756	NA	NA	NA	NA	44	46.2595	38.6162	125.2	Both	120.777	125.192	148.5	133.916	148.461	188.3	189.881	188.258	Illumina OmniExpress & HumanExome	Minimac	HRC and 1KGP3	rvtests	https://www.helic.org
POPGEN	PopGen controls	EUR	940	0.61	53.7	52.2486	54.5557	NA	NA	NA	NA	64.8	NA	NA	130.2	Friedewald	127.78	131.75	109.947	99.4843	117.919	161.2	NA	NA	Affymetrix Axiom	Minimac	HRC and 1KGP3	rvtests	https://pubmed.ncbi.nlm.nih.gov/16490960/
PREVEND	Prevention of REnal and Vascular ENd-stage Disease	EUR	3428	0.51	49.6	48.2005	50.9337	Fasting	4% of individuals	3.1% of individuals	4% of individuals	50.6	57.1711	44.2606	159.3	Measured	152.107	166.285	128.5	111.462	144.803	221	219.264	222.661	Illumina Cyto SNP12 v2 array	Minimac	HRC	rvtests	https://pubmed.ncbi.nlm.nih.gov/12356629/
PROCARDIS- Controls	PRecOcious Coronary ARtery DISease	EUR	1635	0.67	57.3	59.78	56.05	94% Fasting	7% of individuals	7.8% of individuals	7.14% of individuals	54.1	63.81	49.42	129.3	Measured	130.19	128.87	123.3	112.7	128.44	211.4	223.1	205.7	Illumina 600K & Illumina 1M	Minimac	HRC and 1KGP3	rvtests	https://pubmed.ncbi.nlm.nih.gov/26343387/
PROCARDIS-Cases	PRecOcious Coronary ARtery DISease	EUR	4218	0.73	61.9	62.95	61.6	56% Fasting	71% of individuals	69.2% of individuals	71.9% of individuals	44.2	49.45	42.3	138.2	Measured	141.7	136.94	180.5	179.45	180.9	212.9	223.2	209.07	Illumina 600K & Illumina 1M	Minimac	HRC and 1KGP3	rvtests	https://pubmed.ncbi.nlm.nih.gov/26343387/
PROMIS1	Pakistan Risk of Myocardial Infarction Study	SAS	8058	0.81	53.4	54.98	53.05	Both	937 individuals	147 individuals	790 individuals	34.8	38.49	33.99	110.6	Measured	112.3	110.24	206.7	196.42	209.11	183.3	185.8	182.71	Illumina Quad Human660	Minimac	1KGP3	rvtests	https://pubmed.ncbi.nlm.nih.gov/19404752/
PROMIS2	Pakistan Risk of Myocardial Infarction Study	SAS	8052	0.82	54.4	56.25	53.95	Both	2098 individuals	321 individuals	1777 individuals	33.8	37.09	33.05	115.9	Measured	118.46	115.29	208.3	197.66	210.63	190.9	194.55	190.03	Illumina Human OmniExpress 770 K	Minimac	1KGP3	rvtests	https://pubmed.ncbi.nlm.nih.gov/19404752/
PROSPER	PROspective Study of Pravastatin in the Elderly at Risk	EUR	5187	0.48	75.3	75.66	75	Fasting	No	No	No	49.5	53.07	45.58	146.4	Measured	154.27	138.06	137.1	140.97	132.89	219.9	231.85	207.03	Illumina 660K	Minimac	HRC	rvtests	https://pubmed.ncbi.nlm.nih.gov/12457784/; https://pubmed.ncbi.nlm.nih.gov/21977987/
QFS	Quebec Family Study	EUR	877	0.43	42.4	42.6532	42.1087	Fasting	No	No	No	47.4	51.44	42.04	119.5	Friedewald	117.45	122.2	138.7	133.24	145.93	193.5	194.57	192.19	Illumina 610-Quad chip	Minimac	HRC and 1KGP3	rvtests	https://pubmed.ncbi.nlm.nih.gov/23505185/
QIMR	QIMR Berghofer Genetic Epidemiology Cohort	EUR	13372	0.38	48.4	47.7188	49.484	Non-fasting	NA	NA	NA	59.2	63.8648	51.503	125.9	Friedewald	123.072	130.401	167.2	147.554	199.487	218.9	217.796	220.814	Illumina 317,370,610,660,Core+Exome,PsychArray,Omni2.5,OmniExpress	Minimac	HRC and 1KGP3	rvtests	https://pubmed.ncbi.nlm.nih.gov/16899162/
Raine Study	The Raine Study	EUR	903	0.52	20	19.96	20.03	Fasting	NA	NA	NA	51.1	55.57	47.04	96.4	Friedewald	100.02	93.126	94.9	94.34	101.14	167.1	174.5	160.19	Illumina Human 660W Quad Array	Minimac	HRC and 1KGP3	rvtests	https://pubmed.ncbi.nlm.nih.gov/8105165/
RHS	Ragama Health Study	SAS	1796	0.46	52.2	52.059	52.4732	Fasting	No	No	No	49.7	50.3	48.9	135.8	Measured	141.7	128.8	127.2	123	132.1	210.8	216.6	203.9	Illumina 610K, Omni-2.5M	Minimac	1KGP3	rvtests	https://pubmed.ncbi.nlm.nih.gov/19476560/
RISC	Relationship between Insulin Sensitivity and Cardiovascular Disease	EUR	1064	0.44	44	44.46	43.34	NA	NA	NA	NA	55	60.7025	47.9047	112.4	Measured	106.79	119.51	96.2	83.149	112.471	186.6	184.195	189.647	Affymetrix 6.0	Minimac	HRC and 1KGP3	rvtests	https://pubmed.ncbi.nlm.nih.gov/14968294/
ROSMAP1	Religious Orders Study & the Rush Memory and Aging Project	EUR	1162	0.26	80.2	80.1	80.7	Non-fasting	28% of individuals	27% of individuals	30.9% of individuals	58.4	61	50.7	107.9	Measured	110.8	99.5	148.5	152.1	137.7	211	217.3	192.4	Affy 6.0 and Illimina Omni Express	Minimac	HRC	rvtests	https://pubmed.ncbi.nlm.nih.gov/22471867/; https://pubmed.ncbi.nlm.nih.gov/22471860/
ROSMAP2	Religious Orders Study & the Rush Memory and Aging Project	EUR	304	0.24	80.7	80.3	82.1	Non-fasting	42% of individuals	39.8% of individuals	50.7% of individuals	60.5	64.2	49.7	96.2	Measured	100.9	81.9	134.9	139	122.4	203.6	212.4	177.1	Affy 6.0 and Illimina Omni Express	Minimac	HRC	rvtests	https://pubmed.ncbi.nlm.nih.gov/22471867/; https://pubmed.ncbi.nlm.nih.gov/22471860/
RS1	Rotterdam Study I	EUR	3290	0.43	72.4	72.7116	71.8725	Fasting	404 individuals	217 individuals	187 individuals	53.8	57.8102	48.3985	151.4	Measured	154.99	146.487	133.2	134.518	131.348	225.4	233.44	214.526	Illumina 550K	Minimac	HRC and 1KGP3	rvtests	https://pubmed.ncbi.nlm.nih.gov/29064009/
RS2	Rotterdam Study II	EUR	1934	0.46	64.7	64.7631	64.5286	Fasting	245 individuals	124 individuals	121 individuals	53.3	57.9596	47.7803	150.2	Measured	153.043	146.762	137.9	134.362	142.026	224.2	231.305	215.889	Illumina 550K	Minimac	HRC and 1KGP3	rvtests	https://pubmed.ncbi.nlm.nih.gov/29064009/
RS3	Rotterdam Study III	EUR	2963	0.44	57.3	57.4284	57.032	Fasting	658 individuals	331 individuals	327 individuals	55.4	61.496	47.5986	144.9	Measured	146.354	143.07	134.1	122.327	149.247	215.8	222.043	207.622	Illumina 550K	Minimac	HRC and 1KGP3	rvtests	https://pubmed.ncbi.nlm.nih.gov/29064009/
SardiNIA	SardiNIA	EUR	5651	0.42	45.5	45.18	45.91	NA	NA	NA	NA	64.5	68.69	58.81	129.8	Friedewald	127.84	132.44	90.4	78.08	107.31	212.2	212.07	212.26	Illumina Metabochip + Immunochip + OmniExpress + ExomeChip	Minimac	HRC and 1KGP3	rvtests	https://pubmed.ncbi.nlm.nih.gov/26366554/
SBCS	Shanghai Breast Cancer Study	EAS	1870	0	49.9	49.9	NA	Fasting	No	no	NA	51.1	51.1	NA	99.9	Friedewald	99.9	NA	129.2	129.2	NA	179.3	179.3	NA	Affymetrix 6.0	Minimac	1KGP3	rvtests	https://pubmed.ncbi.nlm.nih.gov/28334899/
SCES-610	Singapore Chinese Eye Study (SCES)	EAS	1887	0.51	58.5	58.02	58.92	Non-fasting	Yes	Yes	Yes	50.1	55.69	44.71	138.3	Measured	140.31	136.41	167.5	147.6	186.31	224.1	229.93	218.62	Illumina Human610-Quad	Minimac	1KGP3	rvtests	https://pubmed.ncbi.nlm.nih.gov/19995197/
SCES-omni	Singapore Chinese Eye Study (SCES)	EAS	615	0.51	60.3	59.81	60.76	Non-fasting	Yes	Yes	Yes	51.6	57.66	45.84	138	Measured	139.69	136.35	160.6	136.64	183.47	218.3	223.83	213.02	Illumina Omniexpress	Minimac	1KGP3	rvtests	https://pubmed.ncbi.nlm.nih.gov/19995197/
SCHS- CAD cases	Singapore Chinese Health Study Coronary Artery Disease	EAS	719	0.65	66.6	68.41	65.668	Non-fasting	NA	NA	NA	49.4	54.903	46.464	128.8	Measured	133.451	126.326	148.1	153.724	145.07	205.1	216.317	199.001	Illumina OmniZhonghua	Minimac	1KGP3	rvtests	https://pubmed.ncbi.nlm.nih.gov/26584805/; https://pubmed.ncbi.nlm.nih.gov/26390057/
SCHS- CAD controls	Singapore Chinese Health Study Coronary Artery Disease	EAS	1282	0.64	66.3	68.011	65.318	Non-fasting	NA	NA	NA	52	57.007	49.147	122.4	Measured	126.75	119.859	138.6	133.53	141.542	199.9	208.803	194.8	Illumina OmniZhonghua	Minimac	1KGP3	rvtests	https://pubmed.ncbi.nlm.nih.gov/26584805/; https://pubmed.ncbi.nlm.nih.gov/26390057/
SCHS- T2D cases	Singapore Chinese Health Study	EAS	488	0.48	61.9	61.56	62.28	Both	NA	NA	NA	43.7	46.52	40.64	118.88 non-fasting; 128.16 fasting	Friedewald	123.02 (non-fasting); 135.53 (fasting)	114.35 (non-fasting); 119.9 (fasting)	204.87 non-fasting; 168.83 fasting	200.55 (non-fasting); 169.05 (fasting)	209.46 (non-fasting); 168.6 (fasting)	201.3	209.74	192.02	Affymetrix axiom asian	Minimac	1KGP3	rvtests	https://pubmed.ncbi.nlm.nih.gov/11759279/; https://pubmed.ncbi.nlm.nih.gov/24520337/
SCHS- T2D controls	Singapore Chinese Health Study	EAS	492	0.46	62.1	61.51	62.73	Both	NA	NA	NA	48.7	52.23	44.63	119.31 non-fasting; 130.57 fasting	Friedewald	124.92 (non-fasting); 132.87 (fasting)	112.8 (non-fasting); 127.92 (fasting)	161.16 non-fasting; 118.26 fasting	153.18 (non-fasting); 108.67 (fasting)	170.46 (non-fasting); 129.5 (fasting)	200.5	206.97	193.05	Affymetrix axiom asian	Minimac	1KGP3	rvtests	https://pubmed.ncbi.nlm.nih.gov/11759279/; https://pubmed.ncbi.nlm.nih.gov/24520337/
SDC	Steno Diabetes Center T2D Cases	EUR	825	0.6	62.3	64.01	61.17	Fasting	NA	NA	NA	43.7	46.48	41.87	139.6	Friedewald	146.01	135.25	197.8	209.11	190.13	221.3	232.97	213.29	Illumina HumanOmniExpress-24v1-0_A and HumanOmniExpress-24v1-1_A	Minimac	HRC and 1KGP3	rvtests	https://pubmed.ncbi.nlm.nih.gov/23160641/
SHIP	Study of Health in Pomerania	EUR	4035	0.49	49.8	48.6	50.9	Non-fasting	Yes	Yes	Yes	55.8	61.2	50.2	142	Measured	139	144	161	138	186	226	226	227	Affymetrix Genome-Wide SNP Array 6.0	Minimac	HRC	rvtests	https://pubmed.ncbi.nlm.nih.gov/20167617/
SHIPT	Study of Health in Pomerania	EUR	985	0.44	50.1	50.1	50.1	Fasting	Yes	Yes	Yes	57.2	62.3	50.8	136	Measured	134	138	123	113	137	216	220	212	Illumina Infinium® HumanOmni2.5 BeadChip	Minimac	HRC	rvtests	https://pubmed.ncbi.nlm.nih.gov/20167617/
SIGMA1	SIGMA1	HIS	1530	0.4	57.4	57.16	57.87	Fasting	No	No	No	42.4	44.92	37.59	149.7	Friedewald	151.5	146.88	199.4	188.8	218.17	213.4	217.38	207.44	ILLUMINA OMNI 2.5-ExomeArray-WES	IMPUTE2	1KGP3	rvtests	https://www.ncbi.nlm.nih.gov/pubmed/24390345; https://www.ncbi.nlm.nih.gov/pubmed/28838971; https://www.ncbi.nlm.nih.gov/pubmed/24915262
SIGMA2	SIGMA2	HIS	728	0.43	58.6	58.33	58.95	Fasting	No	No	No	43.5	46.65	38.82	156.1	Friedewald	157.6	154.04	208.8	192.76	232.23	221.2	223.19	218.49	ILLUMINA OMNI 2.5-ExomeArray	IMPUTE2	1KGP3	rvtests	https://www.ncbi.nlm.nih.gov/pubmed/24390345; https://www.ncbi.nlm.nih.gov/pubmed/28838971; https://www.ncbi.nlm.nih.gov/pubmed/24915262
SiMES	Singapore Malay Eye Study	EAS	2541	0.49	59.1	58.31	59.88	Non-fasting	Yes	Yes	Yes	52.2	56.63	47.67	136.9	Measured	137.95	135.81	142.7	136.32	149.2	217.4	221.61	213.07	Illumina 610-Quad	Minimac	1KGP3	rvtests	https://pubmed.ncbi.nlm.nih.gov/17365815/
SINDI	Singapore Indian Eye Study	EAS	2538	0.51	58	57.56	58.5	Non-fasting	Yes	Yes	Yes	41	44.91	37.15	141.3	Measured	142.96	139.65	174.8	156.75	192.01	212.6	215.96	209.47	Illumina 610-Quad	Minimac	1KGP3	rvtests	https://pubmed.ncbi.nlm.nih.gov/19995197/
SORBS	Sorbs	EUR	883	0.59	48.19	48.11	48.32	Fasting	Unknown	NA	NA	62.79	67.24	56.44	131.29	NA	128.01	135.96	119.98	103.03	144.14	206.83	205.58	208.62	500K Affymetrix GeneChip (250K Sty and 250K Nsp arrays, Affymetrix, Inc) and Affymetrix Genome-Wide Human SNP Array 6.0	Minimac	HRC and 1KGP3	rvtests	https://pubmed.ncbi.nlm.nih.gov/19584900/
SP2-1M	Singapore Prospective Study Program	EAS	956	0.64	46.9	44.92	48.06	Fasting	Yes	Yes	Yes	55.1	62.1	51.07	120.8	Friedewald	116.53	123.18	119.2	96.76	131.97	202.2	199.53	203.78	Illumina 1M duov3	Minimac	1KGP3	rvtests	https://pubmed.ncbi.nlm.nih.gov/2348145/;https://pubmed.ncbi.nlm.nih.gov/10333940/; https://pubmed.ncbi.nlm.nih.gov/9328546/;https://pubmed.ncbi.nlm.nih.gov/11693972/
SP2-550	Singapore Prospective Study Program	EAS	334	0.76	49.7	49.84	49.67	Fasting	Yes	Yes	Yes	54	63.74	50.92	122.3	Friedewald	119.92	123.06	131.6	102.21	140.85	207.2	209.76	206.42	Illumina 550 duo	Minimac	1KGP3	rvtests	https://pubmed.ncbi.nlm.nih.gov/2348145/;https://pubmed.ncbi.nlm.nih.gov/10333940/; https://pubmed.ncbi.nlm.nih.gov/9328546/;https://pubmed.ncbi.nlm.nih.gov/11693972/
SP2-610	Singapore Prospective Study Program	EAS	1148	0.23	48.7	48.76	48.49	Fasting	Yes	Yes	Yes	58.8	61.44	49.94	120.7	Friedewald	119.82	123.57	109.4	103.52	128.69	205.6	206.11	204.09	Illumina Human610-Quad Beadchips	Minimac	1KGP3	rvtests	https://pubmed.ncbi.nlm.nih.gov/2348145/;https://pubmed.ncbi.nlm.nih.gov/10333940/; https://pubmed.ncbi.nlm.nih.gov/9328546/;https://pubmed.ncbi.nlm.nih.gov/11693972/
STRIP	Special Turku Coronary Risk Factor Intervention Project - Parents	EUR	1043	0.46	33.5	32.7287	34.3895	Fasting	No	No	No	48.3	51.8547	44.0627	127.6	Friedewald	121.249	135.889	107.6	84.4771	136.789	201.6	196.425	207.641	Illumina InfiniumCoreExome-24 v1.1	Minimac	HRC and 1KGP3	rvtests	https://pubmed.ncbi.nlm.nih.gov/28727955/
SWHS	Shanghai Women Health Study	EAS	607	0	52.6	52.6	NA	Fasting	No	no	NA	50.6	50.6	NA	99.5	Friedewald	99.5	NA	179.5	179.5	NA	182.9	182.9	NA	Affymetrix 6.0	Minimac	1KGP3	rvtests	https://pubmed.ncbi.nlm.nih.gov/28334899/
THISEAS- CAD Case	The Hellenic study of Interactions between Single nucleotide polymorphisms and Eating in Atherosclerosis Susceptibility	EUR	266	0.83	62.1	66.6094	61.1549	Fasting	162 individuals	20 individuals	142 individuals	46.6	52.8864	45.3144	116.9	Measured	141.245	111.957	145.8	151.045	144.765	187.2	210.667	182.365	HumanOmniExpress-12v1-Multi_B	Minimac	HRC and 1KGP3	rvtests	https://pubmed.ncbi.nlm.nih.gov/20167083/
THISEAS- CAD Control	The Hellenic study of Interactions between Single nucleotide polymorphisms and Eating in Atherosclerosis Susceptibility	EUR	575	0.52	54.8	55.7443	53.9745	Fasting	120 individuals	43 individuals	77 individuals	53.3	56.8327	50.2146	130.7	Measured	133.67	128.072	125.6	118.951	131.505	208.9	213.401	204.741	HumanOmniExpress-12v1-Multi_B	Minimac	HRC and 1KGP3	rvtests	https://pubmed.ncbi.nlm.nih.gov/20167083/
THRV	Taiwan Hypertension study of Rare Variants	EAS	1567	0.47	56.9	56.47	57.39	NA	NA	NA	NA	48.3	52.46	43.78	122.2	Both	125.5	118.5	122.1	112.7	132.41	194.5	201.5	186.8	Custom design on Illumina Human Core Chip background	Minimac	1KGP3	rvtests	https://pubmed.ncbi.nlm.nih.gov/29455858/
TRAILS-POP	Tracking Adolescents’ Individual Lives Survey - Population Cohort	EUR	1096	0.48	15.7	15.729	15.6926	Fasting	1 individual	1 individual	1 individual	56	58.2436	53.5815	88	Measured	92.7848	82.6623	67.3	70.3952	63.868	147.1	154.765	138.753	Illumina Cyto SNP12 v2	Minimac	HRC and 1KGP3	rvtests	https://pubmed.ncbi.nlm.nih.gov/18263649/
TUDR	Taiwan US Diabetic Retinopathy Study	EAS	897	0.52	64.5	62.81	65.97	NA	NA	NA	NA	42.4	43.9	41.02	119.4	Both	126.45	112.82	168.4	184.45	153.48	195.6	207.61	184.53	Illumina HumanOmniExpress-12v1_A	Minimac	1KGP3	rvtests	https://pubmed.ncbi.nlm.nih.gov/2356282/;https://pubmed.ncbi.nlm.nih.gov/23562823/
TUK	Twins UK	EUR	3569	0	64.1	64.09	NA	Non-fasting	No	No	NA	72.3	72.34	NA	121	Friedewald	120.95	NA	93.3	93.31	NA	212.5	212.46	NA	HumanHap300, HumanHap610Q, 1M-Duo and 1.2MDuo 1M	Minimac	1KGP3	rvtests	https://pubmed.ncbi.nlm.nih.gov/11780939/
TWINGENE	TWINGENE	EUR	8057	0.45	65.1	64.65	65.5	Fasting	No	No	No	55.2	60.63	48.48	151.1	Friedewald	153.48	148.2	118.4	113.27	124.74	229.3	236.39	220.71	lllumina HumanOmniExpress	Minimac	HRC and 1KGP3	rvtests	https://pubmed.ncbi.nlm.nih.gov/23137839/
TWT2D	Taiwan Type 2 Diabetes Study	EAS	1849	0.51	55	57.26	52.81	Both	156 individuals	88 individuals	68 individuals	49.4	53.17	45.74	109.2	Measured	112.83	105.8	154.9	146.51	163.01	192.2	197.3	187.38	Illumina 550K	Minimac	1KGP3	rvtests	https://pubmed.ncbi.nlm.nih.gov/20174558/
UKB	UK Biobank	SAS	6827	0.53	53.5	53.2	53.9	NA	26.2% of individuals	19.8% of individuals	32.0% of individuals	49	53.5	44.7	129	Measured	130.815	127.061	174	156.7	189.1	205	210.2	200	UK Biobank Axiom	IMPUTE4	HRC and UK10K+1KGP3	SAIGE	https://pubmed.ncbi.nlm.nih.gov/30305743/
UKB	UK Biobank	AdmAFR	6876	0.43	51.9	52	51.8	NA	15.9% of individuals	14.5% of individuals	17.6% of individuals	55	59.3	50.3	126	Measured	125.756	125.918	108	96.7	123.4	202	204.7	199	UK Biobank Axiom	IMPUTE4	HRC and UK10K+1KGP3	SAIGE	https://pubmed.ncbi.nlm.nih.gov/30305743/
UKB	UK Biobank	EUR	389344	0.46	56.9	56.72	57.15	NA	17.5% of individuals	12.7% of individuals	23.1% of individuals	56.1	61.8	49.6	138.1	Measured	140.901	134.757	155.7	138.7	175.7	221	228.2	212.5	UK Biobank Axiom	IMPUTE4	HRC and UK10K+1KGP3	SAIGE	https://pubmed.ncbi.nlm.nih.gov/30305743/
USOC (UKHLS)	The UK Household Longitudinal Study	EUR	9807	0.44	52.4	52.1038	52.8494	NA	NA	NA	NA	59.9	65.1377	53.1137	116.8	Both	118.603	114.523	160.2	141.516	183.919	202.6	206.849	197.255	Illumina HumanCoreExome	Minimac	HRC and 1KGP3	rvtests	https://www.understandingsociety.ac.uk/
Vejle- T2D Cases	Vejle Biobank cases	EUR	2042	0.61	63.6	62.83	64.01	Fasting	NA	NA	NA	49.4	54.17	46.35	116.5	Measured	119.18	114.78	156.8	156.82	156.83	195.2	203.31	190.05	Illumina HumanOmniExpress-24v1-0_A and HumanOmniExpress-24v1-1_A	Minimac	HRC and 1KGP3	rvtests	https://pubmed.ncbi.nlm.nih.gov/27799821/
Vejle- T2D Controls	Vejle Biobank controls	EUR	2201	0.46	58.9	56.51	61.27	Fasting	NA	NA	NA	60.7	66.13	55.28	128.2	Measured	125.67	131.06	110.7	102.73	118.68	210.8	212.31	208.95	Illumina HumanOmniExpress-24v1-0_A and HumanOmniExpress-24v1-1_A	Minimac	HRC and 1KGP3	rvtests	https://pubmed.ncbi.nlm.nih.gov/27799821/
VIKING	VIKING	EUR	2034	0.39	49.4	48.5916	50.6885	Fasting	150 individuals	58 individuals	92 individuals	58.9	63.15	52.35	129.1	Measured	128.04	130.7	87.1	80.58	97.19	205.6	207.39	202.91	Illumina HumanOmniExpressExome8v1-2_A	PBWT	HRC	rvtests	https://www.mrc.ac.uk/research/facilities-and-resources-for-researchers/cohort-directory/viking-health-study-shetland-vhss/
VIS	CROATIA-Vis	EUR	994	0.41	56.1	56.33	55.72	Fasting	Yes	Yes	Yes	28.8	30.56	26.35	68.8	Measured	67.96	69.99	283.6	277.667	292.104	109.6	111.3	107.1	Illumina HumanHap300v1	PBWT	HRC	rvtests
WGHS	Women's Genome Health Study	EUR	23185	0	54.7	54.7	NA	Both	NA	NA	NA	53.8	53.8	NA	124.1	Measured	124.1	NA	144	144	NA	211.9	211.9	NA	HumanHap300 Duo and iSelect	Minimac	HRC	rvtests	https://pubmed.ncbi.nlm.nih.gov/18070814/
WHI-AA	Women's Health Initiative	AdmAFR	8270	0	61.6	61.6	NA	Fasting	No	No	NA	56.6	56.6	NA	144.9	Friedewald	144.9	NA	113.2	113.2	NA	224.1	224.1	NA	Affymetrix 6.0	Minimac	1KGP3	rvtests	https://pubmed.ncbi.nlm.nih.gov/9492970/
WHI-GARNET	Women's Health Initiative	EUR	4199	0	65.7	65.68	NA	NA	10% of individuals	10% of individuals	NA	51.8	51.8	NA	148.3	Friedewald	148.3	NA	165.1	165.1	NA	232.7	232.7	NA	Illumina HumanOmni1-Quad v1-0 B	Minimac	HRC	rvtests	https://pubmed.ncbi.nlm.nih.gov/14575940/
WHI-GECCO	Women's Health Initiative	EUR	119	0	67.2	67.2	NA	NA	11% of individuals	11% of individuals	NA	56.1	56.1	NA	125.1	Friedewald	125.1	NA	173.4	173.4	NA	226.5	226.5	NA	Cytochip 370K	Minimac	HRC	rvtests	https://pubmed.ncbi.nlm.nih.gov/14575940/
WHI-HIPFX	Women's Health Initiative	EUR	401	0	70	70.02	NA	NA	9% of individuals	9% of individuals	NA	56.7	56.7	NA	134.7	Friedewald	134.7	NA	157.2	157.2	NA	224	224	NA	Illumina 550K and 610K	Minimac	HRC	rvtests	https://pubmed.ncbi.nlm.nih.gov/14575940/
WHI-HL	Women's Health Initiative	HIS	3480	0	60.3	60.3	NA	Fasting	No	No	NA	52.6	52.6	NA	140.4	Friedewald	140.4	NA	159.4	159.4	NA	225	225	NA	Affymetrix 6.0	Minimac	1KGP3	rvtests	https://pubmed.ncbi.nlm.nih.gov/9492970/
WHII	Whitehall II	EUR	3399	0.77	49.2	49.9149	48.9945	Fasting	35 individuals	8 individuals	27 individuals	54.5828	66.2086	51.0328	169.6	Friedewald	164.682	171.12	131.8	102.314	140.717	250.2	251.536	249.73	DrugDev consortium array	Minimac	HRC	rvtests
WHI-LLS	Women's Health Initiative	EUR	1096	0	68.5	68.54	NA	NA	8% of individuals	8% of individuals	NA	54.5	54.5	NA	152.6	Friedewald	152.6	NA	141.1	141.1	NA	235.1	235.1	NA	HumanOmniExpressExome-8v1_B	Minimac	HRC	rvtests	https://pubmed.ncbi.nlm.nih.gov/14575940/
WHI-MOPMAP	Women's Health Initiative	EUR	90	0	64.8	64.77	NA	NA	9% of individuals	9% of individuals	NA	59.3	59.3	NA	137.3	Friedewald	137.3	NA	162.5	162.5	NA	229.7	229.7	NA	Affymetrix Gene Titan, Axiom Genome-Wide Human CEU I Array Plate	Minimac	HRC	rvtests	https://pubmed.ncbi.nlm.nih.gov/14575940/
WHI-ONCO	Women's Health Initiative	EUR	1527	0	66.1	66.13	NA	NA	No	NA	NA	54.7	54.7	NA	144.5	Friedewald	144.5	NA	161.3	161.3	NA	235.9	235.9	NA	Infinium OncoArray-500K BeadChip	Minimac	HRC	rvtests	https://pubmed.ncbi.nlm.nih.gov/14575940/
WHI-WHIMS	Women's Health Initiative	EUR	5606	0	68	68.04	NA	NA	11% of individuals	11% of individuals	NA	54.1	54.1	NA	151.7	Friedewald	151.7	NA	141.8	141.8	NA	233.9	233.9	NA	HumanOmniExpressExome-8v1_B	Minimac	HRC	rvtests	https://pubmed.ncbi.nlm.nih.gov/14575940/
WMUB	Wenzhou Medical University Biobank - Tibetans	EAS	2826	0.37	43.7	42.9675	44.8553	NA	NA	NA	NA	50.1	52.33	46.42	104.8	Measured	100.78	111.67	96.3	91.54	104.4	175.7	174.39	177.92	Illumina HumanCoreExome	PBWT	1KGP3	rvtests	https://pubmed.ncbi.nlm.nih.gov/28373541/
YFS	Young Finns Study	EUR	2443	0.46	32.4	32.3159	32.4898	Fasting	<1% of individuals	< 1% of individuals	< 1% of individuals	49.9	53.9941	45.1501	125.1	Both	120.141	130.985	119.3	104.857	136.292	198.1	194.535	202.391	Illumina 670k Custom	Minimac	HRC and 1KGP3	rvtests	https://pubmed.ncbi.nlm.nih.gov/23069987/
