# Supplementary material for: Implicating genes, pleiotropy, and sexual dimorphism at blood lipid loci through multi-ancestry meta-analysis
Source: Genome Biol. 2022 Dec 27;23:268. doi: 10.1186/s13059-022-02837-1 (PMC9793579; doi:10.1186/s13059-022-02837-1)
Supplement: Supplementary file 2 — Additional file 2: Table S2. Association results for the multi-ancestry index SNPs with the gene prioritization. [file 13059_2022_2837_MOESM2_ESM.xlsx]

## Sheet: Sheet1
Table S2. Association results for the multi-ancestry index SNPs with the gene prioritization
rsid_dbSNP150	trait	chr	pos (build 37)	METAL_REF	METAL_ALT	REF_Freq	METAL Effect	StdErr	pvalue_neg_log10	pvalue_neg_log10_MR-MEGA_GC	METAL HetPVal	Mendelian_gene	eQTL	Lipid eQTL	TWAS	Lipid TWAS	PoPS_Top_1	Closest Gene	DEPICT (FDR < 0.05)	Coding Variants	Mouse Model Gene	PoPS+	DEPICT+	gene_6_star	gene_5_star	gene_4_star	gene_3_star	gene_2_star	gene_1_star
rs13303368	HDL	1	914852	G	C	0.419527	0.0097	0.0014	11.3715	9.23262	0.09366	na	AL645608.7;HES4;PLEKHN1;C1orf170;AL390719.1;WASH7P;CPTP	AL645608.7;AL390719.1	na	na	CCNL2	C1orf170	na	C1orf170;PLEKHN1;RP11-54O7.17;HES4	na	na	na	na	na	na	C1orf170	HES4;PLEKHN1	AL390719.1;AL645608.7;CCNL2;CPTP;RP11-54O7.17;WASH7P
rs7542410	HDL	1	1831012	C	T	0.529758	0.0087	0.0013	10.6582	7.53166	0.1959	na	TMEM52;AL109917.1;CALML6;NADK	AL109917.1	RER1	RER1	CCNL2	GNB1	NADK;GNB1	C1orf222;CALML6;TMEM52	ATAD3A	na	NADK;GNB1	na	na	na	na	CALML6;GNB1;NADK;TMEM52	AL109917.1;C1orf222;CCNL2;RER1
rs6605083	logTG	1	2147162	C	T	0.256298	0.0099	0.0015	10.386	9.95691	0.003411	na	na	na	CALML6;TMEM52;CFAP74;SKI	TMEM52;SKI	SKI	AL590822.1	SKI	C1orf86;AL590822.1;RP11-181G12.4;RP11-181G12.5	PEX10	SKI	SKI	na	na	na	SKI	AL590822.1	C1orf86;CALML6;CFAP74;RP11-181G12.4;RP11-181G12.5;TMEM52
rs1123571	LDL	1	2326009	G	A	0.554112	0.0106	0.0013	15.4528	11.5873	0.748	na	PEX10;AL391244.1	na	RER1	RER1	TNFRSF14	RER1	na	na	PEX10	na	na	na	na	na	na	RER1	AL391244.1;PEX10;TNFRSF14
rs55775305	HDL	1	2975119	G	C	0.150099	-0.0129	0.0018	12.1144	7.52921	0.8757	na	na	na	na	na	PRDM16	PRDM16	na	na	na	PRDM16	na	na	na	na	na	PRDM16	na
rs880315	TC	1	10796866	C	T	0.355719	-0.0099	0.0013	13.5802	10.0376	0.3081	na	na	na	PEX14	PEX14	MTOR	CASZ1	na	na	MTOR	na	na	na	na	na	na	na	CASZ1;MTOR;PEX14
rs191220001	HDL	1	12518739	G	A	0.00610876	0.0519	0.0093	7.62046	7.30338	0.02312	na	na	na	na	na	MIIP	VPS13D	na	RN7SL649P;MIIP	na	MIIP	na	na	na	na	na	MIIP	RN7SL649P;VPS13D
rs6690758	LDL	1	15914648	G	A	0.680559	-0.0096	0.0014	11.1533	8.64681	0.3033	na	na	na	CELA2B;CASP9;DNAJC16;AGMAT;FBLIM1;SPEN;C1orf64;HSPB7;FAM131C	CASP9;DNAJC16;AGMAT;FBLIM1;FAM131C	TMEM82	DNAJC16	AGMAT;CELA2B;DDI2	na	CLCNKA;CLCNKB;RSC1A1;TMEM51	na	AGMAT;CELA2B	na	na	na	na	AGMAT;CELA2B;DNAJC16	C1orf64;CASP9;DDI2;FAM131C;FBLIM1;HSPB7;SPEN;TMEM82
rs6690758	TC	1	15914648	G	A	0.673088	-0.0089	0.0013	11.12	7.97097	0.5321	na	na	na	CELA2B;CASP9;DNAJC16;AGMAT;DDI2;PLEKHM2;SLC25A34;FBLIM1;SPEN;C1orf64;HSPB7;CLCNKA;FAM131C	DNAJC16;AGMAT;DDI2;SLC25A34;FBLIM1;FAM131C	TMEM82	DNAJC16	AGMAT;CELA2B;DDI2;PLEKHM2	na	CLCNKA;CLCNKB;RSC1A1;TMEM51	na	AGMAT;CELA2B;DDI2;PLEKHM2	na	na	na	na	AGMAT;CELA2B;DDI2;DNAJC16;PLEKHM2	C1orf64;CASP9;CLCNKA;FAM131C;FBLIM1;HSPB7;SLC25A34;SPEN;TMEM82
rs12562207	logTG	1	16508059	G	A	0.376564	-0.0082	0.0013	9.54787	11.3814	1.78e-05	na	CPLANE2;EPHA2;PADI2	EPHA2	FAM131C;EPHA2;RSG1	EPHA2;RSG1	SPEN	ARHGEF19	FBXO42;EPHA2;ARHGEF19	na	CLCNKA;CLCNKB	na	EPHA2;ARHGEF19	na	na	na	EPHA2	ARHGEF19	CPLANE2;FAM131C;FBXO42;PADI2;RSG1;SPEN
rs36086195	LDL	1	16510894	C	T	0.4457	-0.0141	0.0013	26.6819	21.6404	0.3365	na	EPHA2;BX284668.6	EPHA2	FBLIM1;SPEN;C1orf64;HSPB7;FAM131C;EPHA2;ARHGEF19;RSG1;SZRD1	FBLIM1;FAM131C;EPHA2;RSG1	TMEM82	ARHGEF19	na	na	CLCNKA;CLCNKB	na	na	na	na	na	na	ARHGEF19;EPHA2	BX284668.6;C1orf64;FAM131C;FBLIM1;HSPB7;RSG1;SPEN;SZRD1;TMEM82
rs36086195	nonHDL	1	16510894	C	T	0.419859	-0.0153	0.0015	23.7027	18.3242	0.5598	na	EPHA2;BX284668.6	EPHA2	FBLIM1;SPEN;C1orf64;HSPB7;FAM131C;EPHA2;RSG1;SZRD1	FBLIM1;EPHA2;RSG1	TMEM82	ARHGEF19	EPHA2	na	CLCNKA;CLCNKB	na	EPHA2	na	na	na	EPHA2	na	ARHGEF19;BX284668.6;C1orf64;FAM131C;FBLIM1;HSPB7;RSG1;SPEN;SZRD1;TMEM82
rs36086195	TC	1	16510894	C	T	0.437275	-0.0142	0.0012	31.5809	23.5742	0.3484	na	na	na	PLEKHM2;SLC25A34;FBLIM1;SPEN;C1orf64;HSPB7;CLCNKA;FAM131C;EPHA2;ARHGEF19;RSG1;SZRD1	SLC25A34;FBLIM1;FAM131C;EPHA2;RSG1	TMEM82	ARHGEF19	EPHA2	na	CLCNKA;CLCNKB	na	EPHA2	na	na	na	na	ARHGEF19;EPHA2	C1orf64;CLCNKA;FAM131C;FBLIM1;HSPB7;PLEKHM2;RSG1;SLC25A34;SPEN;SZRD1;TMEM82
rs2992732	TC	1	18802825	G	A	0.342606	0.009	0.0013	11.3546	8.49642	0.9229	na	na	na	KLHDC7A	KLHDC7A	ALDH4A1	KLHDC7A	na	KLHDC7A	na	na	na	na	na	na	KLHDC7A	na	ALDH4A1
rs2992752	LDL	1	18808526	C	A	0.647849	-0.0104	0.0013	14.9051	11.0107	0.9696	na	na	na	KLHDC7A	KLHDC7A	ALDH4A1	KLHDC7A	na	KLHDC7A	na	na	na	na	na	na	KLHDC7A	na	ALDH4A1
rs589942	HDL	1	20916080	G	C	0.296946	-0.0112	0.0014	14.9051	11.0112	0.6087	na	CDA;PINK1	CDA	na	na	EIF4G3	CDA	na	CDA;PLA2G2F	PLA2G2D	na	na	na	na	na	CDA	na	EIF4G3;PINK1;PLA2G2F
rs1767141	HDL	1	23734350	C	A	0.903889	0.0222	0.0021	25.3933	19.0553	0.5184	na	TCEA3	TCEA3	KDM1A;LUZP1;HTR1D;TCEA3;ASAP3	LUZP1;HTR1D;TCEA3;ASAP3	KDM1A	TCEA3	ASAP3	na	FUCA1	KDM1A	ASAP3	na	na	na	TCEA3	ASAP3;KDM1A	HTR1D;LUZP1
rs11340914	logTG	1	23747996	GA	G	0.308977	-0.013	0.0015	17.3517	13.8179	0.07548	na	ASAP3;TCEA3	ASAP3;TCEA3	RP5-1057J7.7;TCEA3;ASAP3;E2F2	TCEA3;ASAP3	GALE	TCEA3	na	na	FUCA1	na	na	na	na	na	TCEA3	ASAP3	E2F2;GALE;RP5-1057J7.7
rs946269	TC	1	23769359	C	T	0.820885	0.0225	0.0016	44.19	37.8825	0.06274	na	na	na	C1orf234;KDM1A;LUZP1;ZNF436;RP5-1057J7.7;TCEA3;ASAP3;E2F2	KDM1A;ZNF436;TCEA3;ASAP3	GALE	ASAP3	ASAP3;TCEA3	na	FUCA1	na	ASAP3;TCEA3	na	na	na	ASAP3	TCEA3	C1orf234;E2F2;GALE;KDM1A;LUZP1;RP5-1057J7.7;ZNF436
rs534417	LDL	1	23784965	G	A	0.83281	0.0145	0.0017	16.8324	12.7377	0.1747	na	TCEA3	TCEA3	KDM1A;LUZP1;HTR1D;TCEA3;ASAP3	LUZP1;HTR1D;TCEA3;ASAP3	GALE	ASAP3	ASAP3;TCEA3	na	FUCA1	na	ASAP3;TCEA3	na	na	na	ASAP3;TCEA3	na	GALE;HTR1D;KDM1A;LUZP1
rs7551124	nonHDL	1	23785760	C	T	0.158061	-0.0191	0.002	20.8871	16.8686	0.08734	na	TCEA3;ASAP3	ASAP3	KDM1A;LUZP1;RP5-1057J7.7;TCEA3;ASAP3;E2F2	TCEA3;ASAP3	GALE	ASAP3	ASAP3;TCEA3	na	FUCA1	na	ASAP3;TCEA3	na	na	ASAP3	TCEA3	na	E2F2;GALE;KDM1A;LUZP1;RP5-1057J7.7
rs2361147	HDL	1	25049949	G	A	0.281293	-0.0092	0.0014	10.3025	7.46988	0.03317	na	na	na	na	na	SRRM1	CLIC4	CLIC4	snoU13;SRRM1	na	SRRM1	CLIC4	na	na	na	na	CLIC4;SRRM1	snoU13
rs11802413	TC	1	25760920	C	T	0.461574	-0.0254	0.0012	98.7127	84.281	0.1888	LDLRAP1	na	na	RSRP1;RP3-465N24.6;RHD;TMEM50A;RHCE;TMEM57;LDLRAP1;RP11-70P17.1;MAN1C1;STMN1	RSRP1;RP3-465N24.6;RHD;TMEM50A;RHCE;TMEM57;LDLRAP1;RP11-70P17.1	LDLRAP1	TMEM57	RHD;RHCE;TMEM57	na	na	LDLRAP1	RHD;RHCE;TMEM57	na	na	na	TMEM57	LDLRAP1;RHCE;RHD	MAN1C1;RP11-70P17.1;RP3-465N24.6;RSRP1;STMN1;TMEM50A
rs9438905	nonHDL	1	25764177	G	A	0.522945	0.027	0.0015	71.7104	64.999	0.5632	LDLRAP1	TMEM57	na	RSRP1;RP3-465N24.6;RHD;TMEM50A;RHCE;TMEM57;LDLRAP1;RP11-70P17.1;SEPN1;MTFR1L;AUNIP;STMN1	RSRP1;RP3-465N24.6;RHD;TMEM50A;RHCE;TMEM57;LDLRAP1;MTFR1L	LDLRAP1	TMEM57	RHD;TMEM57	MTFR1L	na	LDLRAP1	RHD;TMEM57	na	na	TMEM57	na	LDLRAP1;MTFR1L;RHD	AUNIP;RHCE;RP11-70P17.1;RP3-465N24.6;RSRP1;SEPN1;STMN1;TMEM50A
rs10903129	LDL	1	25768937	G	A	0.538503	0.0254	0.0013	84.2864	81.1785	0.1694	LDLRAP1	TMEM57;RHCE	na	RSRP1;RP3-465N24.6;RHD;TMEM50A;RHCE;TMEM57;LDLRAP1;RP11-70P17.1;STMN1	RSRP1;RP3-465N24.6;RHD;TMEM50A;RHCE;TMEM57;LDLRAP1;RP11-70P17.1	LDLRAP1	TMEM57	RHD;RHCE;TMEM57	SYF2;MTFR1L	na	LDLRAP1	RHD;RHCE;TMEM57	na	na	TMEM57	RHCE	LDLRAP1;RHD	MTFR1L;RP11-70P17.1;RP3-465N24.6;RSRP1;STMN1;SYF2;TMEM50A
rs213641	logTG	1	26232356	C	A	0.384791	-0.0091	0.0013	11.5918	8.5056	0.3099	LDLRAP1	MTFR1L;STMN1	na	SEPN1;MTFR1L;AUNIP;PAQR7;STMN1;PAFAH2;EXTL1;CATSPER4	MTFR1L;AUNIP;EXTL1	LDLRAP1	STMN1	SEPN1;FAM54B	na	na	na	SEPN1	na	na	na	STMN1	MTFR1L;SEPN1	AUNIP;CATSPER4;EXTL1;FAM54B;LDLRAP1;PAFAH2;PAQR7
rs113565903	LDL	1	26512556	C	T	0.975374	-0.0335	0.0044	13.5743	11.7925	0.07265	na	na	na	STMN1;EXTL1;SLC30A2;TRIM63;PDIK1L;RP11-96L14.7;CNKSR1;CATSPER4;SH3BGRL3;UBXN11;AIM1L;DHDDS;HMGN2;RPS6KA1	TRIM63;PDIK1L;CNKSR1;SH3BGRL3;DHDDS;HMGN2;RPS6KA1	RPS6KA1	CNKSR1	CNKSR1	MTFR1L	na	RPS6KA1	CNKSR1	na	na	na	CNKSR1	RPS6KA1	AIM1L;CATSPER4;DHDDS;EXTL1;HMGN2;MTFR1L;PDIK1L;RP11-96L14.7;SH3BGRL3;SLC30A2;STMN1;TRIM63;UBXN11
rs113565903	nonHDL	1	26512556	C	T	0.975092	-0.041	0.0051	15.0438	12.5392	0.2081	na	na	na	SEPN1;MTFR1L;AUNIP;STMN1;PAFAH2;EXTL1;SLC30A2;TRIM63;PDIK1L;RP11-96L14.7;CNKSR1;CATSPER4;SH3BGRL3;AIM1L;DHDDS;RPS6KA1	MTFR1L;EXTL1;TRIM63;PDIK1L;SH3BGRL3;DHDDS;RPS6KA1	RPS6KA1	CNKSR1	CNKSR1	MTFR1L	na	RPS6KA1	CNKSR1	na	na	na	CNKSR1	MTFR1L;RPS6KA1	AIM1L;AUNIP;CATSPER4;DHDDS;EXTL1;PAFAH2;PDIK1L;RP11-96L14.7;SEPN1;SH3BGRL3;SLC30A2;STMN1;TRIM63
rs114165349	LDL	1	27021913	G	C	0.978337	-0.0828	0.0045	74.8815	66.6192	0.07074	na	SYTL1	na	CATSPER4;SH3BGRL3;UBXN11;AIM1L;DHDDS;HMGN2;RPS6KA1;ARID1A;PIGV;ZDHHC18;SFN;GPN2;NUDC;NR0B2;KDF1;TRNP1	SH3BGRL3;DHDDS;HMGN2;RPS6KA1;ARID1A;PIGV;ZDHHC18;GPN2;NUDC;KDF1	NR0B2	ARID1A	NR0B2;FCN3;WASF2;SFN;PIGV	na	NR0B2	NR0B2	NR0B2;SFN;PIGV	na	na	na	NR0B2	ARID1A;PIGV;SFN	AIM1L;CATSPER4;DHDDS;FCN3;GPN2;HMGN2;KDF1;NUDC;RPS6KA1;SH3BGRL3;SYTL1;TRNP1;UBXN11;WASF2;ZDHHC18
rs114165349	logTG	1	27021913	G	C	0.978355	-0.0675	0.0045	50.1342	43.0802	0.5314	na	SYTL1	na	CATSPER4;DHDDS;RPS6KA1;ARID1A;PIGV;ZDHHC18;SFN;GPN2;NUDC;NR0B2;KDF1;TRNP1	RPS6KA1;ARID1A;PIGV;ZDHHC18;GPN2;NUDC;KDF1	ARID1A	ARID1A	WASF2;ARID1A;FCN3;NR0B2;AHDC1;WDTC1;SFN;MAP3K6	na	NR0B2	ARID1A	ARID1A;NR0B2;SFN	na	na	ARID1A	na	NR0B2;SFN	AHDC1;CATSPER4;DHDDS;FCN3;GPN2;KDF1;MAP3K6;NUDC;PIGV;RPS6KA1;SYTL1;TRNP1;WASF2;WDTC1;ZDHHC18
rs114165349	nonHDL	1	27021913	G	C	0.977143	-0.0972	0.0052	77.2427	69.8397	0.3106	na	SYTL1	na	CATSPER4;SH3BGRL3;AIM1L;DHDDS;RPS6KA1;ARID1A;PIGV;ZDHHC18;SFN;GPN2;NUDC;NR0B2;KDF1;TRNP1	SH3BGRL3;DHDDS;RPS6KA1;ARID1A;PIGV;ZDHHC18;GPN2;NUDC;KDF1	NR0B2	ARID1A	NR0B2;WASF2;FCN3;SFN;ARID1A;WDTC1	SFN	NR0B2	NR0B2	NR0B2;SFN;ARID1A	na	na	na	ARID1A;NR0B2;SFN	na	AIM1L;CATSPER4;DHDDS;FCN3;GPN2;KDF1;NUDC;PIGV;RPS6KA1;SH3BGRL3;SYTL1;TRNP1;WASF2;WDTC1;ZDHHC18
rs114165349	TC	1	27021913	G	C	0.978418	-0.0598	0.0044	41.3435	35.2077	0.1357	na	na	na	CATSPER4;SH3BGRL3;DHDDS;RPS6KA1;ARID1A;PIGV;ZDHHC18;SFN;GPN2;NUDC;NR0B2;KDF1	DHDDS;RPS6KA1;ARID1A;PIGV;ZDHHC18;GPN2;NUDC;KDF1	ARID1A	ARID1A	WASF2;NR0B2;ARID1A;FCN3;PIGV;MAP3K6;SFN;SYTL1;WDTC1;GPN2;ZDHHC18	SFN	NR0B2	ARID1A	NR0B2;ARID1A;PIGV;SFN;GPN2;ZDHHC18	na	na	ARID1A	SFN	GPN2;NR0B2;PIGV;ZDHHC18	CATSPER4;DHDDS;FCN3;KDF1;MAP3K6;NUDC;RPS6KA1;SH3BGRL3;SYTL1;WASF2;WDTC1
rs75460349	HDL	1	27180088	C	A	0.0220616	-0.0856	0.0044	83.574	73.6249	0.1693	na	na	na	AIM1L;DHDDS;HMGN2;RPS6KA1;ARID1A;PIGV;ZDHHC18;SFN;GPN2;NUDC;NR0B2;KDF1;TRNP1;SYTL1	DHDDS;HMGN2;RPS6KA1;ARID1A;PIGV;ZDHHC18;GPN2;NUDC;KDF1;SYTL1	ARID1A	ZDHHC18	ARID1A;WASF2;FCN3;NR0B2;SFN;GPN2;MAP3K6;AHDC1	na	NR0B2;WDTC1	ARID1A	ARID1A;NR0B2;SFN;GPN2	na	na	na	ARID1A	GPN2;NR0B2;SFN;ZDHHC18	AHDC1;AIM1L;DHDDS;FCN3;HMGN2;KDF1;MAP3K6;NUDC;PIGV;RPS6KA1;SYTL1;TRNP1;WASF2
rs41291086	LDL	1	27668610	C	T	0.964124	-0.0379	0.0037	23.8965	21.1181	0.1043	na	na	na	ZDHHC18;SFN;GPN2;NUDC;NR0B2;KDF1;TRNP1;SYTL1;MAP3K6;FAM76A	ZDHHC18;GPN2;NUDC;KDF1;SYTL1;MAP3K6	NR0B2	SYTL1	NR0B2;FCN3;WASF2;SFN;PIGV	na	NR0B2;WDTC1	NR0B2	NR0B2;SFN	na	na	na	NR0B2	SFN;SYTL1	FAM76A;FCN3;GPN2;KDF1;MAP3K6;NUDC;PIGV;TRNP1;WASF2;ZDHHC18
rs41309280	logTG	1	27688814	C	T	0.965185	-0.0226	0.0037	8.99646	7.8551	0.007318	na	na	na	SFN;GPN2;NUDC;NR0B2;KDF1;TRNP1;SYTL1	GPN2;NUDC;KDF1;SYTL1	AHDC1	MAP3K6	WASF2;ARID1A;FCN3;NR0B2;AHDC1;WDTC1;SFN;MAP3K6	na	NR0B2;WDTC1	na	NR0B2;SFN;MAP3K6	na	na	na	na	AHDC1;MAP3K6;NR0B2;SFN	ARID1A;FCN3;GPN2;KDF1;NUDC;SYTL1;TRNP1;WASF2;WDTC1
rs41309280	nonHDL	1	27688814	C	T	0.96308	-0.0435	0.0043	23.3299	19.3736	0.4071	na	na	na	SFN;GPN2;NUDC;NR0B2;KDF1;TRNP1;SYTL1;MAP3K6	GPN2;NUDC;KDF1;SYTL1;MAP3K6	NR0B2	MAP3K6	NR0B2;WASF2;FCN3;SFN;ARID1A;WDTC1	SYTL1;SFN	NR0B2;WDTC1	NR0B2	NR0B2;SFN	na	na	na	NR0B2;SFN	MAP3K6;SYTL1	ARID1A;FCN3;GPN2;KDF1;NUDC;TRNP1;WASF2;WDTC1
rs41309280	TC	1	27688814	C	T	0.965149	-0.0292	0.0036	15.2997	11.1475	0.6615	na	na	na	SFN;GPN2;NUDC;NR0B2;KDF1;SYTL1;MAP3K6;FAM76A	GPN2;NUDC;KDF1;SYTL1;MAP3K6	NR0B2	MAP3K6	WASF2;NR0B2;ARID1A;FCN3;PIGV;MAP3K6;SFN;SYTL1;GPN2;WDTC1;ZDHHC18	SFN	NR0B2;WDTC1	NR0B2	NR0B2;MAP3K6;SFN;SYTL1;GPN2	na	na	na	MAP3K6;NR0B2;SFN	GPN2;SYTL1	ARID1A;FAM76A;FCN3;KDF1;NUDC;PIGV;WASF2;WDTC1;ZDHHC18
rs7549174	HDL	1	28319484	G	A	0.332628	-0.0136	0.0013	24.887	17.8445	0.5003	na	na	na	FAM76A;XKR8;EYA3	EYA3	AHDC1	EYA3	EYA3	na	SESN2	na	EYA3	na	na	na	EYA3	na	AHDC1;FAM76A;XKR8
rs7549174	TC	1	28319484	G	A	0.335901	-0.0122	0.0013	20.1997	16.136	0.3003	na	na	na	FAM76A;XKR8;EYA3	XKR8;EYA3	AHDC1	EYA3	EYA3;XKR8	na	SESN2	na	EYA3;XKR8	na	na	na	EYA3	XKR8	AHDC1;FAM76A
rs6696836	logTG	1	36021738	C	T	0.123388	0.017	0.0024	11.8516	7.69495	0.1352	na	KIAA0319L	na	SFPQ;ZMYM4;KIAA0319L;NCDN;TFAP2E;PSMB2	SFPQ;ZMYM4;KIAA0319L;NCDN	SFPQ	KIAA0319L	ZMYM4	na	AGO3	SFPQ	ZMYM4	na	na	na	KIAA0319L	SFPQ;ZMYM4	NCDN;PSMB2;TFAP2E
rs59703905	logTG	1	39312160	G	A	0.817121	-0.0114	0.0016	11.9826	7.90199	0.5369	na	na	na	RRAGC;MYCBP;MACF1	RRAGC;MYCBP	MACF1	RRAGC	RRAGC	MACF1;HSPE1P8	na	MACF1	RRAGC	na	na	na	MACF1;RRAGC	na	HSPE1P8;MYCBP
rs4660446	HDL	1	39438889	C	T	0.58508	-0.0117	0.0014	16.1921	11.6457	0.8111	na	na	na	AKIRIN1	na	MACF1	AKIRIN1	na	na	na	na	na	na	na	na	na	AKIRIN1	MACF1
rs4329504	TC	1	39451488	G	A	0.361421	-0.0099	0.0013	13.5802	9.75294	0.2733	na	na	na	AKIRIN1;NDUFS5	AKIRIN1;NDUFS5	MACF1	AKIRIN1	AKIRIN1	AKIRIN1	na	na	AKIRIN1	na	na	AKIRIN1	na	na	MACF1;NDUFS5
rs3768321	HDL	1	40035928	G	T	0.82698	0.0441	0.0017	147.641	134.802	0.9673	na	PABPC4;AL365277.1	na	na	na	PABPC4	PABPC4	na	na	MFSD2A;PABPC4	PABPC4	na	na	na	na	PABPC4	na	AL365277.1
rs3768321	logTG	1	40035928	G	T	0.826547	-0.021	0.0017	34.3282	29.6563	0.692	na	PABPC4;AL365277.1	na	MACF1;BMP8A;PABPC4;HPCAL4;TRIT1;MYCL;MFSD2A	BMP8A;PABPC4;MYCL;MFSD2A	PABPC4	PABPC4	na	MACF1;HSPE1P8	MFSD2A;PABPC4	PABPC4	na	na	na	PABPC4	na	MACF1	AL365277.1;BMP8A;HPCAL4;HSPE1P8;MFSD2A;MYCL;TRIT1
rs7514998	TC	1	45494828	G	C	0.713557	0.0093	0.0013	12.0738	11.1264	0.0002712	na	na	na	PLK3;TCTEX1D4;PTCH2;EIF2B3;HECTD3;UROD;ZSWIM5;LINC01144	HECTD3;UROD;LINC01144	PLK3	ZSWIM5	HECTD3;UROD	RNF220	na	PLK3	HECTD3;UROD	na	na	na	na	HECTD3;PLK3;UROD;ZSWIM5	EIF2B3;LINC01144;PTCH2;RNF220;TCTEX1D4
rs17853159	LDL	1	45810865	G	A	0.929529	0.0217	0.0025	17.4026	13.5603	0.1777	na	na	na	EIF2B3;HECTD3;UROD;ZSWIM5;LINC01144	HECTD3;UROD;LINC01144	MAST2	TESK2	HECTD3;TESK2	TOE1;TESK2;MUTYH	na	na	HECTD3;TESK2	na	na	na	TESK2	HECTD3	EIF2B3;LINC01144;MAST2;MUTYH;TOE1;UROD;ZSWIM5
rs143064733	nonHDL	1	49204135	G	A	0.9978	0.1267	0.0196	9.99234	8.36488	0.1698	na	na	na	na	na	na	AGBL4	na	na	na	na	na	na	na	na	na	na	AGBL4
rs547856250	LDL	1	49263479	G	A	0.997697	0.1356	0.0192	11.7864	11.1003	0.2071	na	na	na	na	na	na	AGBL4	na	na	na	na	na	na	na	na	na	na	AGBL4
rs79090772	logTG	1	51209148	C	T	0.0925424	-0.0233	0.0022	25.4836	20.7794	0.6025	na	na	na	DMRTA2;FAF1;CDKN2C;LINC01562;RNF11	CDKN2C;LINC01562;RNF11	CDKN2C	FAF1	na	na	na	CDKN2C	na	na	na	na	na	CDKN2C;FAF1	DMRTA2;LINC01562;RNF11
rs570553136	LDL	1	52262405	G	A	0.00277887	-0.1675	0.0186	18.6677	14.2577	0.1346	na	CC2D1B;AL513218.1	na	na	na	OSBPL9	NRD1	na	na	na	na	na	na	na	na	na	na	AL513218.1;CC2D1B;NRD1;OSBPL9
rs570553136	nonHDL	1	52262405	G	A	0.00278631	-0.1587	0.0191	16.0151	11.9353	0.3701	na	na	na	na	na	NRD1	NRD1	na	na	na	NRD1	na	na	na	na	na	NRD1	na
rs570553136	TC	1	52262405	G	A	0.0027482	-0.1569	0.0183	16.9993	11.7102	0.3216	na	na	na	na	na	NRD1	NRD1	na	na	na	NRD1	na	na	na	na	na	NRD1	na
rs191875604	LDL	1	54246772	C	T	0.00259242	-0.1894	0.0167	29.0867	28.2162	0.1144	na	na	na	TMEM59	na	SSBP3	NDC1	na	na	DIO1	na	na	na	na	na	na	na	NDC1;SSBP3;TMEM59
rs191875604	nonHDL	1	54246772	C	T	0.00291288	-0.1827	0.0183	22.7452	19.9867	0.284	na	LINC01771	na	TMEM59;SSBP3	na	SSBP3	NDC1	na	na	DIO1	SSBP3	na	na	na	na	na	SSBP3	LINC01771;NDC1;TMEM59
rs191875604	TC	1	54246772	C	T	0.00259959	-0.1653	0.0165	22.8968	18.9494	0.3969	na	na	na	TMEM59;SSBP3	na	SSBP3	NDC1	na	na	DIO1	SSBP3	na	na	na	na	na	SSBP3	NDC1;TMEM59
rs146568567	LDL	1	54824117	G	A	0.995039	0.1162	0.0102	29.3396	62.4702	0.05614	na	na	na	TMEM59;RP4-705F19.1;ACOT11;DHCR24	na	DHCR24	SSBP3	na	na	ACOT11;DHCR24;DIO1	DHCR24	na	na	na	na	na	DHCR24	ACOT11;RP4-705F19.1;SSBP3;TMEM59
rs146568567	nonHDL	1	54824117	G	A	0.994482	0.1093	0.0112	21.7723	42.945	0.009979	na	na	na	TMEM59;SSBP3;RP4-705F19.1;ACOT11	na	DHCR24	SSBP3	na	na	ACOT11;DHCR24;DIO1	na	na	na	na	na	na	SSBP3	ACOT11;DHCR24;RP4-705F19.1;TMEM59
rs1883783	logTG	1	54890956	G	T	0.604495	0.0115	0.0013	18.0429	17.4626	0.0006658	na	na	na	SSBP3;RP4-705F19.1	na	SSBP3	SSBP3	SSBP3	na	ACOT11;DHCR24	SSBP3	SSBP3	na	na	SSBP3	na	na	RP4-705F19.1
rs11591147	LDL	1	55505647	G	T	0.984828	0.4337	0.0053	1456.07	1363.47	0.2966	PCSK9	PCSK9;BSND	PCSK9;BSND	ACOT11;DHCR24;TMEM61;BSND;PCSK9;USP24	TMEM61;BSND;PCSK9;USP24	PCSK9	PCSK9	PCSK9	PCSK9	ACOT11;DHCR24;PCSK9	PCSK9	PCSK9	PCSK9	na	na	na	BSND	ACOT11;DHCR24;TMEM61;USP24
rs11591147	nonHDL	1	55505647	G	T	0.98437	0.4116	0.0063	928.794	874.114	0.1249	PCSK9	na	na	ACOT11;TMEM61;BSND;PCSK9;USP24	BSND;PCSK9;USP24	PCSK9	PCSK9	PCSK9	PCSK9	ACOT11;DHCR24;PCSK9	PCSK9	PCSK9	na	PCSK9	na	na	na	ACOT11;BSND;TMEM61;USP24
rs11591147	TC	1	55505647	G	T	0.984925	0.3773	0.0052	1145.16	1069.83	0.3059	PCSK9	na	na	ACOT11;TMEM61;BSND;PCSK9;USP24	TMEM61;BSND;PCSK9;USP24	PCSK9	PCSK9	PCSK9	PCSK9	ACOT11;DHCR24;PCSK9	PCSK9	PCSK9	na	PCSK9	na	na	na	ACOT11;BSND;TMEM61;USP24
rs150103689	nonHDL	1	56105434	G	C	0.00193696	-0.3655	0.0201	73.1611	68.4841	1	na	na	na	USP24	USP24	USP24	USP24	na	na	na	USP24	na	na	na	na	USP24	na	na
rs186538116	LDL	1	56840574	C	A	0.00244634	-0.3609	0.0191	78.9041	68.9699	0.4144	na	na	na	na	na	C8A	PPAP2B	na	na	PRKAA2	na	na	na	na	na	na	na	C8A;PPAP2B
rs186538116	nonHDL	1	56840574	C	A	0.0024708	-0.327	0.0198	60.5445	54.3257	0.6201	na	na	na	PRKAA2	PRKAA2	PRKAA2	PPAP2B	na	na	PRKAA2	PRKAA2	na	na	na	na	na	PRKAA2	PPAP2B
rs186538116	TC	1	56840574	C	A	0.0023761	-0.3074	0.0188	59.3691	49.0988	0.6362	na	na	na	PRKAA2	PRKAA2	PRKAA2	PPAP2B	na	na	PRKAA2	PRKAA2	na	na	na	na	na	PRKAA2	PPAP2B
rs61772595	HDL	1	56983585	G	A	0.887253	0.0151	0.002	13.3613	9.90598	0.08578	na	na	na	na	na	PRKAA2	PPAP2B	PPAP2B	na	PRKAA2	na	PPAP2B	na	na	na	na	PPAP2B	PRKAA2
rs115947018	nonHDL	1	57851746	G	A	0.979595	0.0213	0.0057	3.72968	11.6641	0.3648	na	na	na	na	na	C8A	DAB1	na	na	na	na	na	na	na	na	na	na	C8A;DAB1
rs185172024	LDL	1	57872099	C	T	0.00195628	-0.1412	0.0182	14.0649	15.5314	0.4069	na	na	na	na	na	C8B	DAB1	na	na	na	na	na	na	na	na	na	na	C8B;DAB1
rs185172024	TC	1	57872099	C	T	0.0019183	-0.1188	0.0178	10.6044	11.4688	0.6562	na	na	na	na	na	C8B	DAB1	na	na	na	na	na	na	na	na	na	na	C8B;DAB1
rs72929847	logTG	1	61684630	G	A	0.920939	0.021	0.0024	17.6709	14.1557	0.531	na	na	na	na	na	NFIA	NFIA	NFIA	na	na	NFIA	NFIA	na	na	na	NFIA	na	na
rs72929847	nonHDL	1	61684630	G	A	0.926096	0.021	0.0029	12.3525	9.85306	0.1311	na	na	na	na	na	na	NFIA	NFIA	na	na	na	NFIA	na	na	na	na	NFIA	na
rs17121833	TC	1	61692655	C	T	0.0692937	-0.0179	0.0024	13.0574	9.13137	0.6202	na	na	na	na	na	na	NFIA	NFIA	na	na	na	NFIA	na	na	na	na	NFIA	na
rs2207794	LDL	1	61865627	C	T	0.749288	0.0098	0.0015	10.1916	8.36258	0.0605	na	na	na	na	na	na	NFIA	NFIA	na	na	na	NFIA	na	na	na	na	NFIA	na
rs636523	LDL	1	62920008	G	A	0.340644	-0.0411	0.0013	218.644	190.017	0.1068	ANGPTL3	na	na	KANK4;USP1;DOCK7;ANGPTL3;ATG4C;RP4-771M4.3	USP1;DOCK7;ANGPTL3;ATG4C	ANGPTL3	DOCK7	ANGPTL3;DOCK7	DOCK7;ANGPTL3	ANGPTL3	ANGPTL3	ANGPTL3;DOCK7	na	na	ANGPTL3;DOCK7	na	na	ATG4C;KANK4;RP4-771M4.3;USP1
rs636523	logTG	1	62920008	G	A	0.34035	-0.0726	0.0013	679.082	598.137	0.4055	ANGPTL3	na	na	INADL;L1TD1;KANK4;USP1;DOCK7;ANGPTL3;ATG4C;RP4-771M4.3	USP1;DOCK7;ANGPTL3;ATG4C	ANGPTL3	DOCK7	ANGPTL3;DOCK7	DOCK7;ANGPTL3	ANGPTL3	ANGPTL3	ANGPTL3;DOCK7	na	na	ANGPTL3;DOCK7	na	na	ATG4C;INADL;KANK4;L1TD1;RP4-771M4.3;USP1
rs636523	nonHDL	1	62920008	G	A	0.329026	-0.0627	0.0016	335.156	323.13	0.08393	ANGPTL3	na	na	KANK4;USP1;DOCK7;ANGPTL3;ATG4C;RP4-771M4.3	USP1;DOCK7;ANGPTL3;ATG4C	ANGPTL3	DOCK7	ANGPTL3;DOCK7	DOCK7;ANGPTL3	ANGPTL3	ANGPTL3	ANGPTL3;DOCK7	na	na	ANGPTL3;DOCK7	na	na	ATG4C;KANK4;RP4-771M4.3;USP1
rs3850634	HDL	1	63050598	G	T	0.329451	-0.013	0.0013	22.817	20.4104	0.0003094	ANGPTL3	na	na	KANK4;USP1;DOCK7;ANGPTL3;ATG4C;RP4-771M4.3	USP1;DOCK7;ANGPTL3;ATG4C	ANGPTL3	DOCK7	ANGPTL3;DOCK7;USP1	DOCK7;ANGPTL3;USP1	ANGPTL3	ANGPTL3	ANGPTL3;DOCK7;USP1	na	na	ANGPTL3;DOCK7	USP1	na	ATG4C;KANK4;RP4-771M4.3
rs995000	TC	1	63107526	C	T	0.673087	0.0647	0.0013	539.664	518.919	0.003348	ANGPTL3	na	na	KANK4;USP1;DOCK7;ANGPTL3;ATG4C;RP4-771M4.3	USP1;DOCK7;ANGPTL3;ATG4C	ANGPTL3	DOCK7	ANGPTL3;DOCK7	DOCK7;ANGPTL3	ANGPTL3	ANGPTL3	ANGPTL3;DOCK7	na	na	ANGPTL3;DOCK7	na	na	ATG4C;KANK4;RP4-771M4.3;USP1
rs772075075	logTG	1	63433116	G	A	0.998719	0.3593	0.0285	35.7141	31.2738	1	ANGPTL3	na	na	DOCK7;ANGPTL3;ATG4C;RP4-771M4.3	DOCK7;ANGPTL3;ATG4C	ANGPTL3	ATG4C	na	DOCK7;ANGPTL3	na	ANGPTL3	na	na	na	na	ANGPTL3	ATG4C;DOCK7	RP4-771M4.3
rs772075075	nonHDL	1	63433116	G	A	0.998651	0.2823	0.029	21.6677	18.3966	1	ANGPTL3	na	na	DOCK7;ANGPTL3;ATG4C;RP4-771M4.3	DOCK7;ANGPTL3;ATG4C	ANGPTL3	ATG4C	na	DOCK7;ANGPTL3	na	ANGPTL3	na	na	na	na	ANGPTL3	ATG4C;DOCK7	RP4-771M4.3
rs574313788	LDL	1	63679932	C	A	0.000336636	-0.4227	0.0602	11.6589	10.157	1	na	USP1;DOCK7;ANGPTL3	DOCK7;ANGPTL3	ATG4C;RP4-771M4.3	ATG4C	na	FOXD3	na	na	na	na	na	na	na	na	na	na	ANGPTL3;ATG4C;DOCK7;FOXD3;RP4-771M4.3;USP1
rs574313788	TC	1	63679932	C	A	0.000342103	-0.5535	0.0573	21.3495	19.341	1	na	na	na	ATG4C;RP4-771M4.3	ATG4C	na	FOXD3	na	na	na	na	na	na	na	na	na	na	ATG4C;FOXD3;RP4-771M4.3
rs530208504	logTG	1	64576995	C	T	0.998182	0.0775	0.0218	3.42261	8.19261	0.8712	na	na	na	na	na	na	ROR1	na	na	na	na	na	na	na	na	na	na	ROR1
rs1938498	HDL	1	66098653	C	T	0.428334	0.0108	0.0013	16.0106	11.8602	0.2965	na	na	na	na	na	LEPR	LEPR	LEPR	na	LEPR	LEPR	LEPR	na	na	na	LEPR	na	na
rs4655772	LDL	1	66130398	G	A	0.568606	0.008	0.0013	9.12133	7.31414	0.0403	na	na	na	na	na	LEPR	LEPR	LEPR	LEPR;snoU13	LEPR	LEPR	LEPR	na	na	LEPR	na	na	snoU13
rs11208700	TC	1	66133443	T	A	0.581636	0.0102	0.0012	16.7222	12.547	0.03217	na	na	na	na	na	LEPR	LEPR	LEPR	na	LEPR	LEPR	LEPR	na	na	na	LEPR	na	na
rs583691	logTG	1	71397835	G	A	0.534508	-0.0089	0.0013	11.12	7.98846	0.9192	na	PTGER3	PTGER3	NEGR1	NEGR1	na	PTGER3	PTGER3	na	CTH;NEGR1	na	PTGER3	na	na	na	PTGER3	na	NEGR1
rs657262	HDL	1	71428732	C	A	0.629003	0.0111	0.0013	16.8664	12.2633	0.9106	na	PTGER3;AL031429.1	PTGER3;AL031429.1	na	na	na	PTGER3	na	na	NEGR1	na	na	na	na	na	na	PTGER3	AL031429.1
rs2613496	HDL	1	72754788	C	T	0.824097	-0.0133	0.0016	16.0282	11.7903	0.3551	na	na	na	na	na	na	NEGR1	na	na	NEGR1	na	na	na	na	na	na	na	NEGR1
rs2613505	logTG	1	72835410	C	T	0.170077	-0.0127	0.0017	13.0978	10.4445	0.2646	na	na	na	NEGR1	NEGR1	na	NEGR1	na	na	NEGR1	na	na	na	na	na	na	NEGR1	na
rs9787306	nonHDL	1	78070458	C	T	0.783711	0.0095	0.0018	6.88353	7.33709	0.0006211	na	DNAJB4	na	NEXN;GIPC2	na	GIPC2	ZZZ3	ZZZ3;GIPC2;USP33	NEXN;FAM73A;DNAJB4;GIPC2;ZZZ3	na	GIPC2	GIPC2;ZZZ3	na	na	GIPC2	ZZZ3	DNAJB4;NEXN	FAM73A;USP33
rs11161570	HDL	1	85721911	C	T	0.511778	-0.0076	0.0012	9.61993	7.85363	0.09361	na	na	na	na	na	na	C1orf52	BCL10	na	LPAR3	na	na	na	na	na	na	na	BCL10;C1orf52
rs165316	logTG	1	91533297	G	A	0.192281	-0.0125	0.0016	14.2513	11.9916	0.2434	na	na	na	ZNF644	na	na	ZNF644	ZNF644	na	na	na	ZNF644	na	na	na	ZNF644	na	na
rs165316	nonHDL	1	91533297	G	A	0.193049	-0.0131	0.0019	11.2679	11.1406	0.006657	na	na	na	na	na	na	ZNF644	na	na	na	na	na	na	na	na	na	na	ZNF644
rs165316	TC	1	91533297	G	A	0.193324	-0.0141	0.0015	20.2631	17.7175	0.02786	na	na	na	na	na	na	ZNF644	na	na	na	na	na	na	na	na	na	na	ZNF644
rs11164605	nonHDL	1	92946479	G	A	0.178688	-0.0234	0.002	30.8946	26.9722	0.1576	na	na	na	RP4-621B10.8;C1orf146;GLMN;RPAP2;GFI1;EVI5;FAM69A	GLMN;RPAP2;GFI1;EVI5;FAM69A	na	GFI1	EVI5;SNORA66;GFI1	na	na	na	EVI5;GFI1	na	na	na	GFI1	EVI5	C1orf146;FAM69A;GLMN;RP4-621B10.8;RPAP2;SNORA66
rs2391159	LDL	1	92971951	C	T	0.818684	0.0234	0.0016	47.7109	38.9418	0.4133	na	na	na	RP4-621B10.8;C1orf146;GLMN;RPAP2;GFI1;EVI5;FAM69A	GLMN;RPAP2;GFI1;EVI5;FAM69A	EVI5	EVI5	EVI5;GFI1	EVI5	na	EVI5	EVI5;GFI1	na	EVI5	na	na	GFI1	C1orf146;FAM69A;GLMN;RP4-621B10.8;RPAP2
rs7530780	TC	1	93130268	C	T	0.340295	-0.0185	0.0013	45.2289	43.5535	1.45e-06	na	na	na	RP4-621B10.8;C1orf146;GLMN;RPAP2;GFI1;EVI5;FAM69A;TMED5	GLMN;RPAP2;GFI1;EVI5;FAM69A;TMED5	GFI1	EVI5	EVI5;GFI1;SNORA66	EVI5	na	GFI1	EVI5;GFI1	na	na	EVI5	GFI1	na	C1orf146;FAM69A;GLMN;RP4-621B10.8;RPAP2;SNORA66;TMED5
rs12133907	logTG	1	93850283	C	A	0.418479	-0.0114	0.0013	17.745	13.6551	0.3552	na	DR1	DR1	TMED5;CCDC18;DR1	TMED5;CCDC18;DR1	MTF2	DR1	TMED5;FNBP1L;MTF2	RP4-717I23.3	CCDC18	na	TMED5	na	na	na	DR1	MTF2;TMED5	CCDC18;FNBP1L;RP4-717I23.3
rs12406245	HDL	1	93860625	G	A	0.392384	0.0257	0.0013	86.2612	72.642	0.7379	na	DR1;TMED5	na	FAM69A;TMED5;CCDC18	FAM69A;CCDC18	TMED5	DR1	TMED5;DR1;MTF2	na	CCDC18	TMED5	TMED5;DR1	na	na	TMED5	DR1	na	CCDC18;FAM69A;MTF2
rs4378243	logTG	1	98395881	G	T	0.170324	0.0133	0.0017	14.2894	11.2178	0.3135	na	na	na	DPYD;RP11-490G2.2	DPYD	na	DPYD	DPYD;MIR2682	na	na	na	DPYD	na	na	na	DPYD	na	MIR2682;RP11-490G2.2
rs397981117	nonHDL	1	107551018	C	CA	0.672702	-0.0119	0.0017	11.5918	8.54373	0.6911	na	na	na	PRMT6	PRMT6	na	PRMT6	na	na	na	na	na	na	na	na	na	PRMT6	na
rs1977658	LDL	1	107607037	G	T	0.690012	-0.0132	0.0015	17.8639	14.634	0.6768	na	PRMT6	PRMT6	PRMT6	PRMT6	na	PRMT6	na	na	na	na	na	na	na	na	PRMT6	na	na
rs115292790	LDL	1	109310728	G	A	0.987321	0.0585	0.0059	22.4469	18.6001	0.3795	na	SARS;PSRC1;AMIGO1;SORT1;CELSR2;GSTM1;SYPL2;GSTM4	SORT1;PSRC1;CELSR2	FAM102B;PRPF38B;FNDC7;CLCC1;WDR47;TAF13;C1orf194;KIAA1324;SARS;CELSR2	FAM102B;CLCC1;TAF13;KIAA1324;SARS;CELSR2	PRPF38B	STXBP3	na	WDR47;KIAA1324	FNDC7	PRPF38B	na	na	na	na	na	CELSR2;KIAA1324;PRPF38B;SARS;WDR47	AMIGO1;C1orf194;CLCC1;FAM102B;FNDC7;GSTM1;GSTM4;PSRC1;SORT1;STXBP3;SYPL2;TAF13
rs115292790	TC	1	109310728	G	A	0.987395	0.0435	0.0058	13.1951	10.4413	0.5088	na	na	na	FAM102B;CLCC1;WDR47;TAF13;C1orf194;KIAA1324;SARS;CELSR2	FAM102B;CLCC1;TAF13;KIAA1324;SARS;CELSR2	PRPF38B	STXBP3	na	WDR47	FNDC7	na	na	na	na	na	na	WDR47	C1orf194;CELSR2;CLCC1;FAM102B;KIAA1324;PRPF38B;SARS;STXBP3;TAF13
rs7528419	logTG	1	109817192	G	A	0.215699	-0.0115	0.0015	13.7532	9.73289	0.3992	na	CELSR2;PSRC1;SORT1	CELSR2;PSRC1;SORT1	PSRC1;GPR61	PSRC1	AMPD2	CELSR2	na	CYB561D1	AMPD2	na	na	na	na	na	na	CELSR2;PSRC1	AMPD2;CYB561D1;GPR61;SORT1
rs12740374	HDL	1	109817590	G	T	0.785922	-0.0338	0.0015	111.708	96.8786	0.009157	na	PSRC1;CELSR2;SORT1	CELSR2;SORT1;PSRC1	CLCC1;WDR47;TAF13;C1orf194;KIAA1324;SARS;CELSR2;PSRC1;MYBPHL;SORT1;PSMA5;SYPL2;ATXN7L2;CYB561D1;AMIGO1;GPR61;GNAI3;AMPD2;GSTM4;GSTM2;GSTM1;GSTM5;GSTM3;EPS8L3	CLCC1;TAF13;KIAA1324;SARS;CELSR2;PSRC1;MYBPHL;SORT1;PSMA5;SYPL2;ATXN7L2;CYB561D1;AMIGO1;GPR61;GNAI3;AMPD2;GSTM4;GSTM2;GSTM1;GSTM5;GSTM3	GNAI3	CELSR2	na	na	AMPD2	GNAI3	na	na	na	na	CELSR2	GNAI3;PSRC1;SORT1	AMIGO1;AMPD2;ATXN7L2;C1orf194;CLCC1;CYB561D1;EPS8L3;GPR61;GSTM1;GSTM2;GSTM3;GSTM4;GSTM5;KIAA1324;MYBPHL;PSMA5;SARS;SYPL2;TAF13;WDR47
rs12740374	LDL	1	109817590	G	T	0.785832	0.1514	0.0015	2214.3	2030.86	4.45e-07	na	SORT1;SARS	na	CLCC1;WDR47;TAF13;C1orf194;KIAA1324;SARS;CELSR2;PSRC1;MYBPHL;SORT1;PSMA5;SYPL2;ATXN7L2;CYB561D1;AMIGO1;GPR61;GNAI3;AMPD2;GSTM4;GSTM2;GSTM1;GSTM5;GSTM3;EPS8L3	CLCC1;TAF13;KIAA1324;SARS;CELSR2;PSRC1;MYBPHL;SORT1;PSMA5;SYPL2;ATXN7L2;CYB561D1;AMIGO1;GPR61;GNAI3;AMPD2;GSTM4;GSTM2;GSTM1;GSTM5;GSTM3	AMPD2	CELSR2	na	MYBPHL;KIAA1324;WDR47	AMPD2	AMPD2	na	na	na	na	na	AMPD2;CELSR2;KIAA1324;MYBPHL;SARS;SORT1;WDR47	AMIGO1;ATXN7L2;C1orf194;CLCC1;CYB561D1;EPS8L3;GNAI3;GPR61;GSTM1;GSTM2;GSTM3;GSTM4;GSTM5;PSMA5;PSRC1;SYPL2;TAF13
rs12740374	nonHDL	1	109817590	G	T	0.789243	0.1393	0.0018	1302.49	1188.38	1.07e-06	na	PSRC1;SORT1;CELSR2	PSRC1;CELSR2;SORT1	CLCC1;TAF13;C1orf194;KIAA1324;SARS;CELSR2;PSRC1;MYBPHL;SORT1;PSMA5;SYPL2;ATXN7L2;CYB561D1;AMIGO1;GPR61;GNAI3;AMPD2;GSTM4;GSTM2;GSTM1;GSTM5;GSTM3	CLCC1;TAF13;KIAA1324;SARS;CELSR2;PSRC1;MYBPHL;SORT1;PSMA5;SYPL2;ATXN7L2;CYB561D1;AMIGO1;GNAI3;AMPD2;GSTM4;GSTM2;GSTM1;GSTM5;GSTM3	SORT1	CELSR2	na	WDR47	AMPD2	SORT1	na	na	na	na	CELSR2;SORT1	PSRC1	AMIGO1;AMPD2;ATXN7L2;C1orf194;CLCC1;CYB561D1;GNAI3;GPR61;GSTM1;GSTM2;GSTM3;GSTM4;GSTM5;KIAA1324;MYBPHL;PSMA5;SARS;SYPL2;TAF13;WDR47
rs12740374	TC	1	109817590	G	T	0.785694	0.127	0.0015	1558.63	1496.7	5.67e-08	na	na	na	CLCC1;WDR47;TAF13;C1orf194;KIAA1324;SARS;CELSR2;PSRC1;MYBPHL;SORT1;PSMA5;SYPL2;ATXN7L2;CYB561D1;AMIGO1;GPR61;GNAI3;AMPD2;GSTM4;GSTM2;GSTM1;GSTM5;GSTM3;EPS8L3	CLCC1;TAF13;KIAA1324;SARS;CELSR2;PSRC1;MYBPHL;SORT1;PSMA5;SYPL2;ATXN7L2;CYB561D1;AMIGO1;GPR61;GNAI3;AMPD2;GSTM4;GSTM2;GSTM1;GSTM5;GSTM3	SORT1	CELSR2	na	SYPL2;WDR47	AMPD2	SORT1	na	na	na	na	na	CELSR2;SORT1;SYPL2;WDR47	AMIGO1;AMPD2;ATXN7L2;C1orf194;CLCC1;CYB561D1;EPS8L3;GNAI3;GPR61;GSTM1;GSTM2;GSTM3;GSTM4;GSTM5;KIAA1324;MYBPHL;PSMA5;PSRC1;SARS;TAF13
rs140266316	LDL	1	110326545	G	A	0.983625	0.0591	0.0059	22.8914	18.2212	0.6681	na	CELSR2;PSRC1;SARS	CELSR2;PSRC1	MYBPHL;SORT1;PSMA5;SYPL2;ATXN7L2;CYB561D1;AMIGO1;GPR61;GNAI3;AMPD2;GSTM4;GSTM2;GSTM1;GSTM5;GSTM3;EPS8L3	MYBPHL;SORT1;PSMA5;SYPL2;ATXN7L2;CYB561D1;AMIGO1;GPR61;GNAI3;AMPD2;GSTM4;GSTM2;GSTM1;GSTM5;GSTM3	AMPD2	GSTM5	EPS8L3	MYBPHL	AMPD2	AMPD2	EPS8L3	na	na	na	na	AMPD2;EPS8L3;GSTM5;MYBPHL	AMIGO1;ATXN7L2;CELSR2;CYB561D1;GNAI3;GPR61;GSTM1;GSTM2;GSTM3;GSTM4;PSMA5;PSRC1;SARS;SORT1;SYPL2
rs140266316	nonHDL	1	110326545	G	A	0.982727	0.0522	0.0067	14.1775	10.5478	0.3677	na	PSRC1;SARS;CELSR2;SORT1	PSRC1;CELSR2;SORT1	MYBPHL;SORT1;PSMA5;SYPL2;ATXN7L2;CYB561D1;AMIGO1;GPR61;GNAI3;AMPD2;GSTM4;GSTM2;GSTM1;GSTM5;GSTM3	MYBPHL;SORT1;PSMA5;SYPL2;ATXN7L2;CYB561D1;AMIGO1;GNAI3;AMPD2;GSTM4;GSTM2;GSTM1;GSTM5;GSTM3	SORT1	GSTM5	EPS8L3	na	AMPD2	SORT1	na	na	na	na	SORT1	GSTM5	AMIGO1;AMPD2;ATXN7L2;CELSR2;CYB561D1;EPS8L3;GNAI3;GPR61;GSTM1;GSTM2;GSTM3;GSTM4;MYBPHL;PSMA5;PSRC1;SARS;SYPL2
rs140266316	TC	1	110326545	G	A	0.983457	0.0442	0.0057	14.0517	10.0712	0.8485	na	na	na	MYBPHL;SORT1;PSMA5;SYPL2;ATXN7L2;CYB561D1;AMIGO1;GPR61;GNAI3;AMPD2;GSTM4;GSTM2;GSTM1;GSTM5;GSTM3;EPS8L3;CSF1;AHCYL1	MYBPHL;SORT1;PSMA5;SYPL2;ATXN7L2;CYB561D1;AMIGO1;GPR61;GNAI3;AMPD2;GSTM4;GSTM2;GSTM1;GSTM5;GSTM3;CSF1	SORT1	GSTM5	EPS8L3	SYPL2	AMPD2	SORT1	EPS8L3	na	na	na	na	EPS8L3;GSTM5;SORT1;SYPL2	AHCYL1;AMIGO1;AMPD2;ATXN7L2;CSF1;CYB561D1;GNAI3;GPR61;GSTM1;GSTM2;GSTM3;GSTM4;MYBPHL;PSMA5
rs333947	HDL	1	110470764	G	A	0.83911	0.0278	0.0017	59.3825	46.2801	0.2748	na	CSF1;AHCYL1	CSF1	SYPL2;ATXN7L2;CYB561D1;AMIGO1;GPR61;GNAI3;AMPD2;GSTM4;GSTM2;GSTM1;GSTM5;GSTM3;EPS8L3	SYPL2;ATXN7L2;CYB561D1;AMIGO1;GPR61;GNAI3;AMPD2;GSTM4;GSTM2;GSTM1;GSTM5;GSTM3	GNAI3	CSF1	CSF1	na	AMPD2	GNAI3	CSF1	na	na	na	CSF1	GNAI3	AHCYL1;AMIGO1;AMPD2;ATXN7L2;CYB561D1;EPS8L3;GPR61;GSTM1;GSTM2;GSTM3;GSTM4;GSTM5;SYPL2
rs1503832	TC	1	114489689	C	T	0.269087	-0.009	0.0013	11.3546	7.42711	0.6653	na	na	na	AP4B1;DCLRE1B;HIPK1	na	HIPK1	HIPK1	HIPK1	AP4B1-AS1;AP4B1	RSBN1	HIPK1	HIPK1	na	na	HIPK1	na	AP4B1	AP4B1-AS1;DCLRE1B
rs6696923	TC	1	118172538	G	A	0.364173	0.0086	0.0013	10.4311	8.3918	0.03197	na	na	na	FAM46C	FAM46C	na	FAM46C	FAM46C	na	na	na	FAM46C	na	na	na	FAM46C	na	na
rs186147970	HDL	1	120484718	C	T	0.0049054	0.0889	0.0129	11.2579	8.07623	0.2378	na	na	na	na	na	na	NOTCH2	na	na	na	na	na	na	na	na	na	na	NOTCH2
rs181473381	HDL	1	145472741	C	A	0.995422	-0.1436	0.0128	28.4816	24.0204	0.07359	na	na	na	na	na	PDE4DIP	ANKRD34A	na	ANKRD35	CD160;PDZK1;TXNIP	na	na	na	na	na	na	na	ANKRD34A;ANKRD35;PDE4DIP
rs181473381	TC	1	145472741	C	A	0.995435	-0.1036	0.0124	16.1836	13.3844	0.3122	na	na	na	na	na	PDZK1	ANKRD34A	na	na	CD160;PDZK1;TXNIP	na	na	na	na	na	na	na	ANKRD34A;PDZK1
rs45548131	logTG	1	149899389	G	A	0.929771	0.0253	0.0025	23.3464	19.9169	0.005208	na	SV2A	SV2A	FCGR1A;HIST2H2BF;HIST2H4A;HIST2H2AB;BOLA1;SV2A;SF3B4;MTMR11;OTUD7B;VPS45;PLEKHO1	FCGR1A;HIST2H2BF;HIST2H4A;HIST2H2AB;BOLA1;SV2A;SF3B4;OTUD7B;VPS45	APH1A	SF3B4	SF3B4;OTUD7B	MTMR11;OTUD7B	OTUD7B	na	SF3B4;OTUD7B	na	na	na	OTUD7B;SF3B4	MTMR11;SV2A	APH1A;BOLA1;FCGR1A;HIST2H2AB;HIST2H2BF;HIST2H4A;PLEKHO1;VPS45
rs192434510	HDL	1	149992277	C	T	0.0784365	0.0244	0.0024	23.5539	17.8988	0.5114	na	na	na	PLEKHO1;ANP32E;CA14;C1orf54;CIART;MRPS21;PRPF3;RPRD2;TARS2;ECM1;FALEC	ANP32E;CIART;PRPF3;RPRD2;TARS2;ECM1	APH1A	OTUD7B	SF3B4;OTUD7B	MTMR11;OTUD7B	OTUD7B	na	OTUD7B	na	na	na	OTUD7B	na	ANP32E;APH1A;C1orf54;CA14;CIART;ECM1;FALEC;MRPS21;MTMR11;PLEKHO1;PRPF3;RPRD2;SF3B4;TARS2
rs72992015	HDL	1	150842696	C	T	0.811517	-0.0219	0.0016	41.9187	36.4318	0.003411	na	ARNT	na	RPRD2;TARS2;ECM1;FALEC;ADAMTSL4;MCL1;GOLPH3L;ARNT;CERS2;ANXA9;PRUNE;MLLT11;GABPB2;SEMA6C	RPRD2;TARS2;ECM1;MCL1;ANXA9;GABPB2;SEMA6C	ARNT	ARNT	ARNT;CERS2;SETDB1	RP11-316M1.3;SETDB1;RP11-316M1.12;CERS2	MCL1;OTUD7B	ARNT	ARNT;CERS2;SETDB1	na	ARNT	na	CERS2	SETDB1	ADAMTSL4;ANXA9;ECM1;FALEC;GABPB2;GOLPH3L;MCL1;MLLT11;PRUNE;RP11-316M1.12;RP11-316M1.3;RPRD2;SEMA6C;TARS2
rs267733	LDL	1	150958836	G	A	0.139695	-0.0195	0.0018	26.6211	21.5728	0.4365	na	na	na	TARS2;ECM1;FALEC;ADAMTSL4;MCL1;GOLPH3L;ARNT;CERS2;ANXA9;PRUNE;MLLT11;GABPB2;SEMA6C	TARS2;ECM1;MCL1;ANXA9;GABPB2;SEMA6C	PI4KB	ANXA9	ANXA9	ANXA9	MCL1;OTUD7B	na	ANXA9	na	na	ANXA9	na	na	ADAMTSL4;ARNT;CERS2;ECM1;FALEC;GABPB2;GOLPH3L;MCL1;MLLT11;PI4KB;PRUNE;SEMA6C;TARS2
rs267733	nonHDL	1	150958836	G	A	0.141364	-0.0195	0.0022	18.111	14.2389	0.7718	na	na	na	ECM1;CERS2;ANXA9;MLLT11;GABPB2;SEMA6C	ANXA9;GABPB2	ARNT	ANXA9	ANXA9	ANXA9;MCL1	MCL1;OTUD7B	na	ANXA9	na	na	ANXA9	na	na	ARNT;CERS2;ECM1;GABPB2;MCL1;MLLT11;SEMA6C
rs61819215	TC	1	151064116	G	A	0.0645385	-0.0181	0.0025	12.3481	9.89518	0.04143	na	na	na	FAM63A;PRUNE;MLLT11;GABPB2;SEMA6C	GABPB2;SEMA6C	PI4KB	GABPB2	na	ANXA9	OTUD7B;TUFT1	na	na	na	na	na	na	GABPB2	ANXA9;FAM63A;MLLT11;PI4KB;PRUNE;SEMA6C
rs184980867	LDL	1	151658543	G	A	0.996547	0.1125	0.0132	16.8073	13.1726	0.273	na	na	na	na	na	PI4KB	SNX27	na	RORC	THEM5;TUFT1	na	na	na	na	na	na	na	PI4KB;RORC;SNX27
rs12354278	TC	1	154243457	T	A	0.112466	0.0126	0.0019	10.4787	7.48279	0.3051	na	na	na	UBAP2L;HAX1	HAX1	SLC39A1	UBAP2L	UBAP2L	INTS3;SLC27A3;NUP210L;ADAR;SHE;IL6R;CRTC2;DENND4B;TPM3;RAB13	ATP8B2;C1orf43;IL6R	na	UBAP2L	na	na	na	UBAP2L	na	ADAR;CRTC2;DENND4B;HAX1;IL6R;INTS3;NUP210L;RAB13;SHE;SLC27A3;SLC39A1;TPM3
rs12750321	logTG	1	154251626	G	A	0.279789	-0.0138	0.0014	22.1949	17.857	0.08125	na	HAX1;UBAP2L	HAX1	SLC27A3;GATAD2B;DENND4B;CRTC2;SLC39A1;JTB;RP11-422P24.11;RAB13;RPS27;TPM3;C1orf43;UBAP2L;HAX1	GATAD2B;CRTC2;SLC39A1;RAB13;TPM3;UBAP2L;HAX1	GATAD2B	HAX1	UBAP2L	UBE2Q1	ATP8B2;C1orf43;IL6R	GATAD2B	UBAP2L	na	na	na	HAX1;UBAP2L	GATAD2B	C1orf43;CRTC2;DENND4B;JTB;RAB13;RP11-422P24.11;RPS27;SLC27A3;SLC39A1;TPM3;UBE2Q1
rs12750321	nonHDL	1	154251626	G	A	0.299777	-0.0106	0.0016	10.4594	7.43697	0.2712	na	HAX1;UBAP2L	HAX1	UBAP2L;HAX1	HAX1	SLC39A1	HAX1	UBAP2L	TDRD10;DENND4B;UBE2Q1;UBE2Q1-AS1;AL590431.1;SNORA58;UBAP2L	ATP8B2;C1orf43;IL6R	na	UBAP2L	na	na	UBAP2L	HAX1	na	AL590431.1;DENND4B;SLC39A1;SNORA58;TDRD10;UBE2Q1;UBE2Q1-AS1
rs9616	HDL	1	154555733	T	A	0.27176	0.0095	0.0014	10.9374	7.6313	0.04268	na	na	na	ADAM15;EFNA4;EFNA3	na	TPM3	ADAR	ADAR	ATP8B2;AQP10;ADAR	ATP8B2;C1orf43;IL6R	na	ADAR	na	na	na	ADAR	na	ADAM15;AQP10;ATP8B2;EFNA3;EFNA4;TPM3
rs12743272	logTG	1	155033334	G	A	0.877902	-0.0129	0.0019	10.9487	8.03947	0.1384	na	ADAM15;MUC1	na	na	na	SHC1	ADAM15	EFNA1;EFNA4;ADAM15	EFNA3;RUSC1	GBA;MUC1	na	ADAM15	na	na	na	ADAM15	na	EFNA1;EFNA3;EFNA4;MUC1;RUSC1;SHC1
rs4390169	LDL	1	155106054	G	A	0.467458	-0.0112	0.0013	17.1567	14.0655	0.3836	na	EFNA1;GBA;THBS3	THBS3	ADAM15;EFNA4;EFNA3;EFNA1;SLC50A1;KRTCAP2;TRIM46;MUC1;THBS3;MTX1;GBA	EFNA1;SLC50A1;THBS3;MTX1	SHC1	EFNA1	EFNA1;KRTCAP2	EFNA1;SLC50A1	GBA;MSTO1;MUC1	na	EFNA1;KRTCAP2	na	EFNA1	na	na	GBA;KRTCAP2;SLC50A1;THBS3	ADAM15;EFNA3;EFNA4;MTX1;MUC1;SHC1;TRIM46
rs6676150	TC	1	155123837	G	C	0.650299	0.0092	0.0013	11.8315	11.3763	0.001159	na	na	na	ADAM15;EFNA4;EFNA3;EFNA1;SLC50A1;KRTCAP2;MUC1;THBS3;MTX1	SLC50A1;THBS3;MTX1	SHC1	DPM3	EFNA1	GBAP1;MTX1;RP11-263K19.6;RP11-263K19.4;THBS3;EFNA1;SLC50A1	GBA;MSTO1;MUC1	na	EFNA1	na	na	na	EFNA1	MTX1;SLC50A1;THBS3	ADAM15;DPM3;EFNA3;EFNA4;GBAP1;KRTCAP2;MUC1;RP11-263K19.4;RP11-263K19.6;SHC1
rs760077	nonHDL	1	155178782	T	A	0.634337	0.0082	0.0016	6.52646	9.55493	1.06e-06	na	THBS3;AC234582.1;MUC1;GBA;TRIM46	AC234582.1;THBS3;MUC1	ADAM15;EFNA4;EFNA1;SLC50A1;KRTCAP2;THBS3;MTX1	SLC50A1;MTX1	SHC1	THBS3	PKLR;CLK2;EFNA1;FDPS;YY1AP1;ASH1L;GON4L	GBAP1;MTX1;RP11-263K19.6;RP11-263K19.4;THBS3;EFNA3;ADAM15;EFNA4;EFNA1;SLC50A1	GBA;MSTO1;MUC1	na	EFNA1	na	na	THBS3	EFNA1	ADAM15;EFNA4;MTX1;SLC50A1	AC234582.1;ASH1L;CLK2;EFNA3;FDPS;GBA;GBAP1;GON4L;KRTCAP2;MUC1;PKLR;RP11-263K19.4;RP11-263K19.6;SHC1;TRIM46;YY1AP1
rs12161427	HDL	1	156705822	C	T	0.701942	-0.011	0.0014	14.4056	10.4896	0.5984	na	RRNAD1;HDGF;PRCC	RRNAD1	na	na	MEF2D	RRNAD1	HDGF;PRCC;ISG20L2	HDGF;MRPL24	BGLAP;BGLAP;ETV3;NES	na	HDGF;PRCC	na	na	na	HDGF	PRCC;RRNAD1	ISG20L2;MEF2D;MRPL24
rs2022003	LDL	1	158586966	T	A	0.289795	0.0106	0.0014	13.4328	12.0448	0.007885	na	na	na	SPTA1	na	SPTA1	SPTA1	SPTA1	SPTA1;OR10Z1	na	SPTA1	SPTA1	na	SPTA1	na	na	na	OR10Z1
rs2022003	nonHDL	1	158586966	T	A	0.296495	0.0124	0.0016	14.0367	11.5468	0.06239	na	na	na	SPTA1	na	SPTA1	SPTA1	SPTA1	SPTA1	na	SPTA1	SPTA1	na	SPTA1	na	na	na	na
rs857725	TC	1	158607935	G	T	0.268619	0.0122	0.0014	17.5337	15.037	0.04115	na	na	na	SPTA1	na	SPTA1	SPTA1	SPTA1	SPTA1;OR10Z1	na	SPTA1	SPTA1	na	SPTA1	na	na	na	OR10Z1
rs4656984	HDL	1	161078909	C	T	0.660544	0.0105	0.0014	13.1951	9.30417	0.9548	na	PEX19	PEX19	FCGR3A	na	APOA2	PFDN2	DEDD;ADAMTS4;B4GALT3;USP21;NDUFS2	na	APOA2;FCER1G;NR1I3	na	na	na	na	na	na	na	ADAMTS4;APOA2;B4GALT3;DEDD;FCGR3A;NDUFS2;PEX19;PFDN2;USP21
rs115383270	LDL	1	161531340	G	A	0.930495	-0.0187	0.0027	11.3634	9.03197	0.1859	na	na	na	FCGR3A;FCGR2B	na	APOA2	FCGR3A	FCGR2B	FCGR3A;RP11-25K21.6	APOA2;FCER1G;NR1I3	na	FCGR2B	na	na	na	FCGR3A	FCGR2B	APOA2;RP11-25K21.6
rs115383270	TC	1	161531340	G	A	0.930263	-0.0246	0.0026	20.5179	17.0154	0.09476	na	na	na	FCGR2A;HSPA6;FCGR3A;FCGR3A;FCGR2B	FCGR2A;FCGR2B	APOA2	FCGR3A	FCGR2B	FCGR3A;RP11-25K21.6	APOA2;FCER1G;NR1I3	na	FCGR2B	na	na	FCGR3A	na	FCGR2B	APOA2;FCGR2A;HSPA6;RP11-25K21.6
rs1771582	HDL	1	161614490	G	T	0.593432	0.01	0.0015	10.5822	8.18593	0.111	na	SLAMF7;NDUFS2;TSTD1	na	FCGR3A;FCGR2B	na	APOA2	FCGR2B	FCGR2B	na	APOA2;FCER1G;NR1I3	na	FCGR2B	na	na	na	FCGR2B	na	APOA2;FCGR3A;NDUFS2;SLAMF7;TSTD1
rs12404665	nonHDL	1	172357433	C	T	0.589407	-0.0111	0.0015	12.8659	10.087	0.05083	na	na	na	PIGC;C1orf105;SUCO	na	na	DNM3	na	na	na	na	na	na	na	na	na	na	C1orf105;DNM3;PIGC;SUCO
rs9425300	HDL	1	172361977	G	T	0.572385	0.0113	0.0013	17.4496	12.5086	0.9315	na	na	na	SUCO	na	na	DNM3	na	na	na	na	na	na	na	na	na	na	DNM3;SUCO
rs9425300	logTG	1	172361977	G	T	0.564764	-0.0133	0.0013	23.8405	20.5005	0.03608	na	na	na	PIGC;C1orf105;SUCO	PIGC	na	DNM3	na	na	na	na	na	na	na	na	na	na	C1orf105;DNM3;PIGC;SUCO
rs4442420	HDL	1	174168805	G	T	0.598982	0.0094	0.0013	12.3185	7.95798	0.3911	na	na	na	GPR52	GPR52	RC3H1	RABGAP1L	RC3H1;SERPINC1	na	na	na	na	na	na	na	na	RC3H1	GPR52;RABGAP1L;SERPINC1
rs7414200	nonHDL	1	174538958	G	C	0.236071	0.0122	0.0018	10.9135	8.32294	0.55	na	na	na	RP11-160H22.5;RABGAP1L;GPR52;MRPS14	RP11-160H22.5;GPR52;MRPS14	na	RABGAP1L	SERPINC1;RC3H1;KLHL20	RABGAP1L	na	na	na	na	na	na	RABGAP1L	na	GPR52;KLHL20;MRPS14;RC3H1;RP11-160H22.5;SERPINC1
rs630372	HDL	1	177885762	G	A	0.765143	0.0117	0.0015	14.2083	10.0628	0.4616	na	na	na	SEC16B	SEC16B	na	SEC16B	na	na	RASAL2;SEC16B	na	na	na	na	na	na	SEC16B	na
rs6682862	LDL	1	177938437	G	A	0.807152	0.0121	0.0016	13.403	11.054	0.0449	na	SEC16B;RASAL2	SEC16B	SEC16B	SEC16B	na	SEC16B	na	na	RASAL2;SEC16B	na	na	na	na	na	SEC16B	na	RASAL2
rs6682862	TC	1	177938437	G	A	0.809074	0.0092	0.0016	8.04942	7.50843	0.005052	na	na	na	SEC16B	na	SEC16B	SEC16B	na	RASAL2-AS1;RASAL2;SEC16B;RP4-798P15.3;RP11-63B19.1	RASAL2;SEC16B	SEC16B	na	na	na	SEC16B	na	na	RASAL2;RASAL2-AS1;RP11-63B19.1;RP4-798P15.3
rs4077194	HDL	1	178533832	G	T	0.497876	0.0183	0.0012	51.7835	40.3554	0.3421	na	na	na	na	na	na	C1orf220	na	na	RASAL2	na	na	na	na	na	na	na	C1orf220
rs1689797	HDL	1	182150978	C	A	0.686852	0.0242	0.0013	76.6178	65.0175	0.02746	na	na	na	na	na	GLUL	ZNF648	GLUL	na	RGS16	na	na	na	na	na	na	GLUL	ZNF648
rs1689801	LDL	1	182165484	G	A	0.68653	-0.0131	0.0013	23.1556	17.6339	0.143	na	na	na	na	na	na	ZNF648	GLUL	na	RGS16	na	na	na	na	na	na	na	GLUL;ZNF648
rs1689801	nonHDL	1	182165484	G	A	0.686365	-0.0145	0.0016	18.8945	15.4603	0.672	na	na	na	na	na	na	ZNF648	GLUL	na	RGS16	na	na	na	na	na	na	na	GLUL;ZNF648
rs7525917	LDL	1	183065406	G	A	0.563792	0.0115	0.0013	18.0429	15.9652	0.08826	na	na	na	LAMC1;LAMC2	LAMC1	SMG7	LAMC1	LAMC1	LAMC1;SMG7	NPL;RGS16	na	LAMC1	na	na	LAMC1	na	SMG7	LAMC2
rs3359	TC	1	183112041	G	C	0.435051	-0.0119	0.0012	22.4531	18.1616	0.3266	na	na	na	LAMC1;LAMC2	LAMC1	SMG7	LAMC1	LAMC1	LAMC1	NPL	na	LAMC1	na	na	LAMC1	na	na	LAMC2;SMG7
rs10911263	nonHDL	1	183115018	C	T	0.43463	-0.011	0.0015	12.6488	10.5921	0.08527	na	na	na	LAMC1;LAMC2	LAMC1	SMG7	LAMC1	LAMC1	LAMC1	NPL	na	LAMC1	na	na	LAMC1	na	na	LAMC2;SMG7
rs1952256	HDL	1	184035116	G	A	0.343589	-0.0084	0.0013	9.98446	7.57024	0.09417	na	TSEN15	na	na	na	SMG7	TSEN15	na	TSEN15	na	na	na	na	na	na	TSEN15	na	SMG7
rs115276619	logTG	1	184865132	T	A	0.985238	0.0502	0.0055	19.1534	15.3126	0.1452	na	na	na	EDEM3	na	na	FAM129A	RNF2	EDEM3	na	na	na	na	na	na	na	EDEM3	FAM129A;RNF2
rs12137359	LDL	1	197129981	C	T	0.809738	-0.0111	0.0017	10.1803	7.87317	0.09755	na	na	na	na	na	na	ZBTB41	CFHR5;CFHR2;F13B	F13B	ASPM	na	F13B	na	na	na	na	F13B	CFHR2;CFHR5;ZBTB41
rs10922179	TC	1	197159347	G	A	0.78829	-0.0117	0.0016	12.5813	9.52815	0.1959	na	na	na	F13B	na	na	ZBTB41	CFHR5;CFHR2;F13B	F13B	ASPM	na	F13B	na	na	na	F13B	na	CFHR2;CFHR5;ZBTB41
rs17625587	nonHDL	1	198990494	G	A	0.748188	0.0101	0.0017	8.54824	7.97036	0.007667	na	na	na	na	na	PTPRC	PTPRC	na	PTPRC	na	PTPRC	na	na	na	na	PTPRC	na	na
rs1434282	LDL	1	199010721	C	T	0.265495	-0.0099	0.0014	11.8143	8.58944	0.1622	na	na	na	na	na	PTPRC	PTPRC	na	na	na	PTPRC	na	na	na	na	na	PTPRC	na
rs1434282	TC	1	199010721	C	T	0.263182	-0.0087	0.0014	9.2877	9.58602	0.0004111	na	na	na	PTPRC	na	PTPRC	PTPRC	na	na	na	PTPRC	na	na	na	na	PTPRC	na	na
rs6658424	HDL	1	200049302	T	A	0.721103	0.0092	0.0014	10.3025	8.12712	0.0206	na	CAMSAP2	na	LINC00862	na	NR5A2	NR5A2	NR5A2	na	NR5A2	NR5A2	NR5A2	na	na	na	NR5A2	na	CAMSAP2;LINC00862
rs6686987	logTG	1	202184600	C	T	0.623055	0.0091	0.0013	11.5918	7.89963	0.8571	na	LGR6	na	PTPN7;LGR6;SYT2	na	PPP1R12B	LGR6	LGR6	na	na	na	LGR6	na	na	LGR6	na	na	PPP1R12B;PTPN7;SYT2
rs12143329	HDL	1	202197659	C	T	0.633045	-0.0099	0.0013	13.5802	10.3971	0.03503	na	LGR6	na	na	na	NAV1	LGR6	na	na	KDM5B	na	na	na	na	na	na	LGR6	NAV1
rs2486942	TC	1	203255493	T	A	0.411572	-0.0079	0.0012	10.3372	7.36119	0.06954	na	na	na	CHIT1;LINC01353;BTG2	LINC01353	KDM5B	CHIT1	CHIT1	ATP2B4	ADIPOR1;KDM5B	na	CHIT1	na	na	na	CHIT1	na	ATP2B4;BTG2;KDM5B;LINC01353
rs2821226	logTG	1	203517292	G	A	0.5367	-0.0132	0.0014	20.3812	16.1797	0.1635	na	ATP2B4;AC098934.3	na	OPTC;ATP2B4	ATP2B4	BTG2	OPTC	na	na	ZC3H11A	na	na	na	na	na	na	ATP2B4;OPTC	AC098934.3;BTG2
rs13303359	HDL	1	203518873	C	A	0.515812	0.0118	0.0014	16.456	11.5601	0.91	na	PPP1R12B;ATP2B4;AC098934.3	na	na	na	BTG2	OPTC	na	CHI3L1	ZC3H11A	na	na	na	na	na	na	na	AC098934.3;ATP2B4;BTG2;CHI3L1;OPTC;PPP1R12B
rs11240358	logTG	1	205070573	G	A	0.577188	-0.0114	0.0013	17.745	18.7173	2.24e-06	na	RBBP5	RBBP5	CNTN2;TMEM81;RBBP5;DSTYK;TMCC2	RBBP5;TMCC2	CDK18	RBBP5	na	TMCC2	NFASC;NUAK2	na	na	na	na	na	RBBP5	TMCC2	CDK18;CNTN2;DSTYK;TMEM81
rs3862948	HDL	1	205099959	C	A	0.747145	0.0127	0.0014	18.9301	13.5672	0.09615	na	na	na	na	na	CDK18	RBBP5	RBBP5;DSTYK	na	ELK4;NFASC;NUAK2	na	RBBP5	na	na	na	na	RBBP5	CDK18;DSTYK
rs12048743	nonHDL	1	205114873	G	C	0.506492	0.0101	0.0015	10.7804	9.43514	0.02469	na	DSTYK	na	DSTYK	na	CDK18	DSTYK	na	TMCC2	ELK4;NFASC;NUAK2	na	na	na	na	na	DSTYK	na	CDK18;TMCC2
rs3747973	HDL	1	205677148	G	A	0.554951	0.0149	0.0013	29.6865	25.271	0.4522	na	RAB29;NUCKS1;SLC41A1	na	na	na	CDK18	NUCKS1	NUCKS1	na	ELK4;NUAK2;NUCKS1;PM20D1	na	NUCKS1	na	na	na	NUCKS1	na	CDK18;RAB29;SLC41A1
rs397982763	HDL	1	209849714	TA	T	0.083976	0.0175	0.0024	12.5141	7.78605	0.8922	na	na	na	na	na	na	G0S2	na	C1orf74	G0S2;HSD11B1	na	na	na	na	na	na	na	C1orf74;G0S2
rs3767861	HDL	1	212537553	G	A	0.64119	-0.01	0.0013	13.8401	9.2753	0.6774	na	na	na	na	na	ATF3	TMEM206	PPP2R5A	na	BATF3	na	na	na	na	na	na	na	ATF3;PPP2R5A;TMEM206
rs59770119	HDL	1	219664627	G	A	0.471522	0.0159	0.0013	33.6718	28.6077	0.2486	na	na	na	na	na	EPRS	SLC30A10	na	na	ZC3H11B	na	na	na	na	na	na	na	EPRS;SLC30A10
rs2820468	nonHDL	1	219673705	G	A	0.667804	0.0099	0.0016	9.21378	8.93357	0.002191	na	na	na	na	na	na	SLC30A10	na	na	ZC3H11B	na	na	na	na	na	na	na	SLC30A10
rs2820441	logTG	1	219734960	C	A	0.298273	-0.0193	0.0014	42.5077	40.9361	0.002597	na	na	na	RP11-392O17.1;RP11-95P13.2;ZC3H11B	RP11-392O17.1;RP11-95P13.2	EPRS	SLC30A10	na	na	BPNT1;ZC3H11B	na	na	na	na	na	na	na	EPRS;RP11-392O17.1;RP11-95P13.2;SLC30A10;ZC3H11B
rs2642438	HDL	1	220970028	G	A	0.732755	0.028	0.0014	88.2591	76.0582	0.02437	na	MOSC1	na	C1orf115;MOSC1;RNU6ATAC35P;RP11-295M18.6;LINC01352;HLX	MOSC1;RP11-295M18.6;LINC01352;HLX	HLX	MARCHF1	MOSC1	MOSC1	na	HLX	na	na	na	MOSC1	na	HLX	C1orf115;LINC01352;MARCHF1;RNU6ATAC35P;RP11-295M18.6
rs2642438	LDL	1	220970028	G	A	0.730333	0.0286	0.0014	92.0306	80.8545	0.004834	na	MOSC1	na	C1orf115;MOSC1;RNU6ATAC35P;RP11-295M18.6;LINC01352;HLX	MOSC1;RP11-295M18.6;LINC01352;HLX	HLX	MARCHF1	MOSC1	MOSC1	na	HLX	na	na	na	MOSC1	na	HLX	C1orf115;LINC01352;MARCHF1;RNU6ATAC35P;RP11-295M18.6
rs2642438	logTG	1	220970028	G	A	0.730652	-0.0155	0.0014	27.7629	24.3417	0.001299	na	MOSC1	na	C1orf115;MARC2;MOSC1;RNU6ATAC35P;RP11-295M18.6;LINC01352;HLX	C1orf115;MOSC1;RNU6ATAC35P;HLX	na	MARCHF1	MOSC1	MOSC1	na	na	na	na	na	MOSC1	na	na	C1orf115;HLX;LINC01352;MARC2;MARCHF1;RNU6ATAC35P;RP11-295M18.6
rs2642438	nonHDL	1	220970028	G	A	0.725992	0.0223	0.0017	38.5835	34.3539	0.14	na	MOSC1	na	C1orf115;MOSC1;RNU6ATAC35P;RP11-295M18.6;LINC01352;HLX	RP11-295M18.6;LINC01352;HLX	HLX	MARCHF1	MOSC1	MOSC1	na	HLX	na	na	na	MOSC1	na	HLX	C1orf115;LINC01352;MARCHF1;RNU6ATAC35P;RP11-295M18.6
rs2642438	TC	1	220970028	G	A	0.733472	0.0294	0.0014	97.1832	91.6355	0.012	na	na	na	C1orf115;MARC2;MOSC1;RNU6ATAC35P;RP11-295M18.6;LINC01352;HLX	MOSC1;RP11-295M18.6;LINC01352;HLX	HLX	MARCHF1	MOSC1	MOSC1	na	HLX	na	na	na	na	MOSC1	HLX	C1orf115;LINC01352;MARC2;MARCHF1;RNU6ATAC35P;RP11-295M18.6
rs56105022	HDL	1	224544746	G	A	0.967536	0.0304	0.0038	14.9051	11.0401	0.3261	na	AC092809.4	na	DEGS1;CNIH4;WDR26;CNIH3	CNIH4;WDR26;CNIH3	WDR26	CNIH4	WDR26;PARP1;FBXO28	na	DEGS1	WDR26	WDR26	na	na	na	WDR26	CNIH4	AC092809.4;CNIH3;DEGS1;FBXO28;PARP1
rs11803981	LDL	1	224545410	C	T	0.232643	-0.0111	0.0016	11.3989	9.84783	0.3049	na	CNIH3;CNIH4	CNIH3;CNIH4	DEGS1;CNIH4;WDR26;CNIH3	CNIH4;WDR26;CNIH3	WDR26	CNIH4	WDR26	WDR26	DEGS1	WDR26	WDR26	na	na	WDR26	CNIH4	CNIH3	DEGS1
rs7519734	TC	1	224549524	C	T	0.226871	-0.0139	0.0015	19.7166	17.0767	0.1044	na	na	na	DEGS1;CNIH4;WDR26;CNIH3	DEGS1;CNIH4;WDR26;CNIH3	WDR26	CNIH4	WDR26;PARP1	WDR26	DEGS1	WDR26	WDR26	na	na	WDR26	na	CNIH4	CNIH3;DEGS1;PARP1
rs6663522	nonHDL	1	224646328	C	T	0.794814	0.0127	0.0019	10.6342	9.31018	0.425	na	CNIH4;CNIH3	CNIH3;CNIH4	DEGS1;CNIH4;WDR26;CNIH3	CNIH4;WDR26;CNIH3	na	CNIH3	WDR26	WDR26	DEGS1	na	WDR26	na	na	na	CNIH3;WDR26	CNIH4	DEGS1
rs6690181	logTG	1	228056868	C	T	0.448592	-0.0081	0.0014	8.14143	8.65506	0.0002824	na	WNT9A	WNT9A	na	na	C1orf35	PRSS38	na	na	na	na	na	na	na	na	na	na	C1orf35;PRSS38;WNT9A
rs4846913	HDL	1	230294715	C	A	0.465608	-0.0483	0.0013	301.42	284.424	0.0001223	na	na	na	na	na	GALNT2	GALNT2	GALNT2	na	GALNT2	GALNT2	GALNT2	na	na	na	GALNT2	na	na
rs4846913	logTG	1	230294715	C	A	0.457097	0.0424	0.0013	232.605	224.277	1.45e-05	na	na	na	RP11-552D4.1;GALNT2;COG2	RP11-552D4.1;GALNT2;COG2	GALNT2	GALNT2	GALNT2	na	GALNT2	GALNT2	GALNT2	na	na	GALNT2	na	na	COG2;RP11-552D4.1
rs4846923	nonHDL	1	230307222	G	T	0.695491	-0.015	0.0016	20.16	21.8635	1.58e-05	na	na	na	na	na	GALNT2	GALNT2	GALNT2	na	GALNT2	GALNT2	GALNT2	na	na	na	GALNT2	na	na
rs145957520	HDL	1	230796872	C	CAT	0.0415679	-0.0247	0.0037	10.6089	7.65395	0.8278	na	na	na	na	na	AGT	COG2	AGT	na	ARV1;GALNT2	na	na	na	na	na	na	AGT	COG2
rs75054794	logTG	1	230823363	G	A	0.0478741	0.0224	0.0031	12.3027	10.1296	0.05563	na	na	na	GALNT2;COG2	GALNT2;COG2	AGT	COG2	AGT	na	ARV1;GALNT2	na	na	na	na	na	na	AGT;COG2	GALNT2
rs508293	logTG	1	234848712	G	A	0.429826	-0.0085	0.0013	10.2065	8.16854	0.09961	na	AL160408.3;AL160408.6	AL160408.6	LINC01354;RP4-781K5.6;RP4-781K5.7	LINC01354;RP4-781K5.7	ARID4B	IRF2BP2	na	na	na	na	na	na	na	na	na	na	AL160408.3;AL160408.6;ARID4B;IRF2BP2;LINC01354;RP4-781K5.6;RP4-781K5.7
rs553427	HDL	1	234852760	C	T	0.427297	-0.0158	0.0013	33.2618	28.7807	0.1307	na	AL160408.3;AL160408.6	AL160408.6	LINC01354;IRF2BP2;LINC00184;RP4-781K5.9;RP4-781K5.4;RP4-781K5.6;RP4-781K5.7;LINC01132;RP11-443B7.1	LINC00184;RP4-781K5.6;RP4-781K5.7;RP11-443B7.1	TOMM20	IRF2BP2	na	na	na	na	na	na	na	na	na	IRF2BP2	AL160408.3;AL160408.6;LINC00184;LINC01132;LINC01354;RP11-443B7.1;RP4-781K5.4;RP4-781K5.6;RP4-781K5.7;RP4-781K5.9;TOMM20
rs557933	LDL	1	234853268	C	A	0.568392	0.0391	0.0013	198.013	185.541	0.03803	na	AL160408.6;AL160408.3	AL160408.6	LINC01354;IRF2BP2;LINC00184;RP4-781K5.9;RP4-781K5.4;RP4-781K5.6;RP4-781K5.7;LINC01132;RP11-443B7.1	LINC00184;RP4-781K5.6;RP4-781K5.7;RP11-443B7.1	IRF2BP2	IRF2BP2	na	na	na	IRF2BP2	na	na	na	na	IRF2BP2	na	AL160408.3;AL160408.6;LINC00184;LINC01132;LINC01354;RP11-443B7.1;RP4-781K5.4;RP4-781K5.6;RP4-781K5.7;RP4-781K5.9
rs557933	TC	1	234853268	C	A	0.573247	0.0414	0.0012	260.096	227.256	0.01327	na	na	na	LINC01354;IRF2BP2;LINC00184;RP4-781K5.9;RP4-781K5.4;RP4-781K5.6;RP4-781K5.7;LINC01132;RP11-443B7.1	LINC01354;LINC00184;RP4-781K5.6;RP4-781K5.7;RP11-443B7.1	IRF2BP2	IRF2BP2	na	na	na	IRF2BP2	na	na	na	na	IRF2BP2	na	LINC00184;LINC01132;LINC01354;RP11-443B7.1;RP4-781K5.4;RP4-781K5.6;RP4-781K5.7;RP4-781K5.9
rs558971	nonHDL	1	234853406	G	A	0.561662	0.0395	0.0015	152.099	140.664	0.268	na	AL160408.3;AL160408.6	AL160408.6	LINC01354;IRF2BP2;LINC00184;RP4-781K5.9;RP4-781K5.4;RP4-781K5.6;RP4-781K5.7;LINC01132;RP11-443B7.1	LINC01354;LINC00184;RP4-781K5.6;RP4-781K5.7;RP11-443B7.1	na	IRF2BP2	na	na	na	na	na	na	na	na	na	IRF2BP2	AL160408.3;AL160408.6;LINC00184;LINC01132;LINC01354;RP11-443B7.1;RP4-781K5.4;RP4-781K5.6;RP4-781K5.7;RP4-781K5.9
rs12121187	LDL	1	246892695	G	A	0.897412	-0.0146	0.0021	11.4447	8.8618	0.4095	na	SCCPDH;AL591848.4	SCCPDH	CNST;SCCPDH	SCCPDH	na	SCCPDH	SCCPDH	na	na	na	SCCPDH	na	na	SCCPDH	na	na	AL591848.4;CNST
rs6710091	HDL	2	239597	G	C	0.327848	0.0154	0.0013	31.6472	23.533	0.6754	na	SH3YL1	SH3YL1	na	na	na	SH3YL1	na	FAM150B;ACP1	na	na	na	na	na	na	na	SH3YL1	ACP1;FAM150B
rs62114538	logTG	2	256116	G	T	0.648933	0.0107	0.0013	15.7305	11.2415	0.9676	na	na	na	FAM110C;SH3YL1;ACP1;FAM150B	SH3YL1;ACP1;FAM150B	na	SH3YL1	na	FAM150B;ACP1;SH3YL1	na	na	na	na	na	na	SH3YL1	ACP1;FAM150B	FAM110C
rs56236159	nonHDL	2	3636478	G	T	0.206147	0.0122	0.002	8.97441	7.36936	0.06366	na	ALLC;COLEC11	ALLC;COLEC11	COLEC11;ALLC	ALLC	TRAPPC12	COLEC11	COLEC11	TRAPPC12-AS1;TRAPPC12;TSSC1;RP11-1293J14.1;ADI1;RNASEH1;RP13-512J5.1;COLEC11;AC010907.2	na	TRAPPC12	COLEC11	na	COLEC11	na	na	ALLC;TRAPPC12	AC010907.2;ADI1;RNASEH1;RP11-1293J14.1;RP13-512J5.1;TRAPPC12-AS1;TSSC1
rs6542680	logTG	2	3640142	C	T	0.221374	-0.0155	0.0016	21.4675	17.3979	0.1017	na	COLEC11;ALLC	COLEC11;ALLC	AC108488.4;COLEC11;ALLC	COLEC11;ALLC	na	COLEC11	COLEC11	na	na	na	COLEC11	na	na	COLEC11	na	ALLC	AC108488.4
rs6542680	TC	2	3640142	C	T	0.2386	0.0168	0.0015	28.3896	23.0452	0.04216	na	COLEC11;ALLC	COLEC11;ALLC	AC108488.4;COLEC11;ALLC	COLEC11;ALLC	TRAPPC12	COLEC11	COLEC11	na	na	na	COLEC11	na	na	COLEC11	na	ALLC	AC108488.4;TRAPPC12
rs3820897	HDL	2	3642361	C	T	0.778726	-0.0223	0.0016	43.4262	36.1041	0.9069	na	COLEC11;ALLC	ALLC;COLEC11	COLEC11;ALLC	COLEC11;ALLC	na	COLEC11	COLEC11	na	na	na	COLEC11	na	na	COLEC11	na	ALLC	na
rs3820897	LDL	2	3642361	C	T	0.779176	-0.0163	0.0016	23.6469	20.4299	0.02711	na	COLEC11;ALLC	COLEC11;ALLC	AC108488.4;COLEC11;ALLC	COLEC11;ALLC	TRAPPC12	COLEC11	COLEC11	na	na	na	COLEC11	na	na	COLEC11	na	ALLC	AC108488.4;TRAPPC12
rs11679703	LDL	2	8718961	G	A	0.72503	0.0104	0.0014	12.9595	8.85901	0.9219	na	LINC01814;LINC00299	LINC00299;LINC01814	LINC00299;AC011747.4	LINC00299;AC011747.4	na	ID2	na	AC011747.3;AC011747.4	na	na	na	na	na	na	na	AC011747.4;LINC00299	AC011747.3;ID2;LINC01814
rs4669294	TC	2	8723673	G	A	0.713685	0.0109	0.0014	14.1591	10.5283	0.9257	na	LINC01814;LINC00299	LINC00299;LINC01814	LINC00299;AC011747.4	LINC00299;AC011747.4	na	ID2	ID2	AC011747.3;AC011747.4	na	na	ID2	na	na	na	na	AC011747.4;ID2;LINC00299	AC011747.3;LINC01814
rs798383	LDL	2	16890382	G	C	0.205829	-0.0046	0.0018	1.97462	7.4953	8.9e-09	na	FAM49A	na	na	na	na	FAM49A	na	na	na	na	na	na	na	na	na	FAM49A	na
rs750772	LDL	2	17967586	G	A	0.121073	-0.0175	0.0019	19.4887	14.7433	0.214	na	GEN1	na	SMC6;GEN1	GEN1	na	SMC6	na	GEN1;SMC6	SMC6	na	na	na	na	na	GEN1;SMC6	na	na
rs750772	nonHDL	2	17967586	G	A	0.110032	-0.0181	0.0023	14.4487	12.0216	0.005562	na	GEN1	na	SMC6;GEN1	GEN1	na	SMC6	na	na	SMC6	na	na	na	na	na	na	GEN1;SMC6	na
rs750772	TC	2	17967586	G	A	0.119955	-0.0176	0.0019	19.7023	16.2233	0.3638	na	GEN1	na	SMC6;GEN1	SMC6;GEN1	na	SMC6	SMC6	na	SMC6	na	SMC6	na	na	na	SMC6	GEN1	na
rs759257847	LDL	2	19693384	G	A	0.000195599	0.5752	0.0916	9.46888	20.2785	1	na	na	na	na	na	na	OSR1	na	na	na	na	na	na	na	na	na	na	OSR1
rs759257847	nonHDL	2	19693384	G	A	0.000209617	0.4422	0.0884	6.24671	14.7853	1	na	na	na	na	na	na	OSR1	na	na	na	na	na	na	na	na	na	na	OSR1
rs759257847	TC	2	19693384	G	A	0.000224539	0.381	0.078	5.98451	11.0691	1	na	na	na	WDR35	WDR35	na	OSR1	na	na	na	na	na	na	na	na	na	na	OSR1;WDR35
rs79279183	LDL	2	20370641	C	A	0.502695	-0.0183	0.0013	44.2786	36.3299	0.5925	na	SDC1	na	AC098828.2;SDC1;HS1BP3;GDF7	SDC1;HS1BP3;GDF7	SDC1	SDC1	na	na	na	SDC1	na	na	na	SDC1	na	na	AC098828.2;GDF7;HS1BP3
rs907866	nonHDL	2	20371380	G	A	0.543859	0.0225	0.0015	50.1342	44.0975	0.8278	na	na	na	AC098828.2;SDC1;GDF7	SDC1	SDC1	SDC1	SDC1	na	na	SDC1	SDC1	na	na	SDC1	na	na	AC098828.2;GDF7
rs907866	TC	2	20371380	G	A	0.544775	0.0259	0.0012	102.589	91.1487	0.03767	na	na	na	WDR35;LAPTM4A;RP11-644K8.1;AC098828.2;SDC1;HS1BP3;GDF7	WDR35;SDC1;HS1BP3;GDF7	RHOB	SDC1	SDC1	na	na	na	SDC1	na	na	na	SDC1	na	AC098828.2;GDF7;HS1BP3;LAPTM4A;RHOB;RP11-644K8.1;WDR35
rs1107850	logTG	2	20371772	G	A	0.512769	0.0181	0.0012	50.681	41.0355	0.01223	na	na	na	WDR35;LAPTM4A;AC098828.2;SDC1;GDF7	WDR35;LAPTM4A	SDC1	SDC1	SDC1	na	na	SDC1	SDC1	na	na	SDC1	na	na	AC098828.2;GDF7;LAPTM4A;WDR35
rs2090034	HDL	2	20372409	G	A	0.524793	0.0137	0.0012	29.4619	25.3153	0.0002315	na	SDC1	na	AC098828.2;SDC1;HS1BP3;GDF7	SDC1;HS1BP3;GDF7	SDC1	SDC1	SDC1	na	na	SDC1	SDC1	na	SDC1	na	na	na	AC098828.2;GDF7;HS1BP3
rs676210	HDL	2	21231524	G	A	0.753069	-0.0569	0.0015	314.139	292.715	4.86e-09	APOB	AC010872.1	na	HS1BP3;GDF7;LDAH;APOB;TDRD15;AC067959.1	HS1BP3;GDF7;LDAH;APOB;AC067959.1	APOB	APOB	APOB	APOB;RP11-116D2.1	APOB	APOB	APOB	na	APOB	na	na	na	AC010872.1;AC067959.1;GDF7;HS1BP3;LDAH;RP11-116D2.1;TDRD15
rs676210	logTG	2	21231524	G	A	0.753369	0.0642	0.0015	399.509	397.368	4.75e-26	APOB	AC010872.1	na	GDF7;AC012361.1;APOB;TDRD15;AC067959.1	AC067959.1	APOB	APOB	APOB	APOB	APOB	APOB	APOB	na	APOB	na	na	na	AC010872.1;AC012361.1;AC067959.1;GDF7;TDRD15
rs934197	LDL	2	21267461	G	A	0.700721	-0.0948	0.0014	997.598	970.067	8.24e-05	APOB	na	na	HS1BP3;GDF7;LDAH;APOB;TDRD15;AC067959.1	HS1BP3;GDF7;LDAH;APOB;AC067959.1	APOB	APOB	APOB	APOB	APOB	APOB	APOB	na	APOB	na	na	na	AC067959.1;GDF7;HS1BP3;LDAH;TDRD15
rs934197	nonHDL	2	21267461	G	A	0.700885	-0.0927	0.0016	730.771	669.651	0.001037	APOB	na	na	GDF7;LDAH;APOB;TDRD15;AC067959.1	APOB;AC067959.1	APOB	APOB	APOB	APOB	APOB	APOB	APOB	na	APOB	na	na	na	AC067959.1;GDF7;LDAH;TDRD15
rs934197	TC	2	21267461	G	A	0.707828	-0.0835	0.0013	897.767	795.345	0.001444	APOB	na	na	HS1BP3;GDF7;LDAH;APOB;TDRD15;AC067959.1	HS1BP3;GDF7;LDAH;APOB;AC067959.1	APOB	APOB	APOB	APOB	APOB	APOB	APOB	na	APOB	na	na	na	AC067959.1;GDF7;HS1BP3;LDAH;TDRD15
rs114040256	logTG	2	21778585	G	A	0.0102049	-0.0511	0.0078	10.2438	8.14547	0.4316	na	GDF7	GDF7	TDRD15;AC067959.1	AC067959.1	na	TDRD15	na	na	na	na	na	na	na	na	na	TDRD15	AC067959.1;GDF7
rs147821144	nonHDL	2	21818551	G	A	0.0177526	0.3834	0.0278	42.5417	33.7075	1	na	na	na	TDRD15;AC067959.1	AC067959.1	na	TDRD15	na	na	na	na	na	na	na	na	na	TDRD15	AC067959.1
rs147821144	TC	2	21818551	G	A	0.0194092	0.2897	0.0208	43.3677	33.1228	1	na	na	na	TDRD15;AC067959.1	AC067959.1	na	TDRD15	na	na	na	na	na	na	na	na	na	TDRD15	AC067959.1
rs191450029	LDL	2	21942500	G	C	0.999709	-0.7993	0.0744	26.1956	27.2177	1	na	APOB;LDAH	APOB	AC067959.1	AC067959.1	na	na	na	na	na	na	na	na	na	na	na	na	AC067959.1;APOB;LDAH
rs116500366	HDL	2	21979516	G	A	0.973523	-0.0152	0.0044	3.25867	8.2091	0.001433	na	na	na	AC067959.1	AC067959.1	na	na	na	na	na	na	na	na	na	na	na	na	AC067959.1
rs148868229	nonHDL	2	22445083	C	T	0.0145947	0.2867	0.0295	21.6001	15.3481	1	na	na	na	AC067959.1	AC067959.1	na	na	na	na	na	na	na	na	na	na	na	na	AC067959.1
rs148868229	TC	2	22445083	C	T	0.0163046	0.2323	0.0222	24.8981	17.7529	1	na	na	na	AC067959.1	AC067959.1	na	na	na	na	na	na	na	na	na	na	na	na	AC067959.1
rs4665495	LDL	2	22501253	G	T	0.462642	-0.0005	0.0013	0.154578	8.01735	2.24e-09	na	na	na	AC067959.1	AC067959.1	na	na	na	na	na	na	na	na	na	na	na	na	AC067959.1
rs11889451	LDL	2	23015285	C	T	0.798326	0.0058	0.0016	3.53916	11.1615	1.66e-10	na	na	na	na	na	na	na	na	na	na	na	na	na	na	na	na	na	na
rs557901815	nonHDL	2	23117602	C	T	0.0105694	0.3928	0.0484	15.3161	12.6905	1	na	na	na	na	na	na	KLHL29	na	na	na	na	na	na	na	na	na	na	KLHL29
rs557901815	TC	2	23117602	C	T	0.0100141	0.3009	0.0351	16.9951	14.4586	1	na	na	na	na	na	na	KLHL29	na	na	na	na	na	na	na	na	na	na	KLHL29
rs749331	TC	2	23882347	G	A	0.553499	0.003	0.0013	1.67744	8.3137	4.31e-10	na	AC009228.1;AC008073.2	na	RP11-557N21.1;SF3B6	na	na	KLHL29	ATAD2B;UBXN2A	na	ATAD2B;MFSD2B	na	na	na	na	na	na	na	AC008073.2;AC009228.1;ATAD2B;KLHL29;RP11-557N21.1;SF3B6;UBXN2A
rs55661701	LDL	2	24400769	C	A	0.230462	0.0098	0.0015	10.1916	13.1563	1.79e-07	na	AC008073.2;AC009228.1	na	FAM228A	FAM228A	ITSN2	RP11-507M3.1	ITSN2	ITSN2	ATAD2B;MFSD2B;NCOA1	ITSN2	ITSN2	na	na	na	ITSN2	na	AC008073.2;AC009228.1;FAM228A;RP11-507M3.1
rs72387328	TC	2	24726602	GT	G	0.651982	0.0123	0.0016	13.8238	13.2159	6.5e-05	na	AC008073.2;AC009228.1	na	SF3B6;FAM228A;ITSN2;NCOA1	FAM228A	NCOA1	NCOA1	na	ITSN2	CENPO;MFSD2B;NCOA1	NCOA1	na	na	na	na	NCOA1	ITSN2	AC008073.2;AC009228.1;FAM228A;SF3B6
rs11903847	logTG	2	25592918	C	T	0.661872	-0.0078	0.0014	7.59747	8.09053	0.03747	na	ASXL2;PTGES3P2;DTNB	ASXL2;PTGES3P2	ASXL2	na	DNMT3A	DTNB	DNMT3A	na	EFR3B	na	na	na	na	na	na	ASXL2;DNMT3A;DTNB	PTGES3P2
rs4665299	TC	2	26256840	C	A	0.808863	-0.0098	0.0015	10.1916	10.4948	9.89e-05	na	na	na	RAB10;GAREML;HADHA;HADHB	RAB10	HADHA	RAB10	RAB10	na	HADHA;HADHB	HADHA	RAB10	na	na	na	RAB10	HADHA	GAREML;HADHB
rs142787485	LDL	2	26358156	G	A	0.0347619	-0.0275	0.0039	11.7513	8.97825	0.2172	na	na	na	RAB10;CIB4	RAB10	HADHA	RAB10	HADHB;HADHA;GPR113;EPT1	na	HADHA;HADHB	na	na	na	na	na	na	HADHA;RAB10	CIB4;EPT1;GPR113;HADHB
rs142787485	nonHDL	2	26358156	G	A	0.037352	-0.0305	0.0044	11.3815	8.71061	0.1369	na	na	na	CIB4	na	HADHA	RAB10	HADHA;HADHB;EPT1;GPR113;RAB10	na	HADHA;HADHB	na	RAB10	na	na	na	na	HADHA;RAB10	CIB4;EPT1;GPR113;HADHB
rs13432533	HDL	2	26571411	G	A	0.495677	0.009	0.0013	11.3546	8.41549	0.3785	na	EPT1;DRC1	na	RAB10;CIB4;KCNK3	RAB10;KCNK3	HADHA	EPT1	GPR113	na	HADHA;HADHB	na	na	na	na	na	na	EPT1	CIB4;DRC1;GPR113;HADHA;KCNK3;RAB10
rs1275984	TC	2	26911509	C	A	0.550536	0.0105	0.0012	17.6709	15.9074	0.0002833	na	na	na	GAREML;HADHA;HADHB;CIB4;KCNK3;SLC35F6;CENPA;DPYSL5;OST4;EMILIN1;CGREF1;ABHD1;PREB;TCF23	KCNK3;SLC35F6;DPYSL5;EMILIN1;CGREF1;PREB	KHK	KCNK3	na	na	CGREF1;HADHA;HADHB	na	na	na	na	na	na	KCNK3	ABHD1;CENPA;CGREF1;CIB4;DPYSL5;EMILIN1;GAREML;HADHA;HADHB;KHK;OST4;PREB;SLC35F6;TCF23
rs1275979	LDL	2	26923568	C	T	0.562943	0.0095	0.0013	12.5658	9.88191	0.2849	na	na	na	CIB4;KCNK3;OST4;EMILIN1;CGREF1;SLC5A6	KCNK3;EMILIN1	PREB	KCNK3	na	na	CGREF1;HADHA;HADHB	na	na	na	na	na	na	KCNK3	CGREF1;CIB4;EMILIN1;OST4;PREB;SLC5A6
rs57035494	logTG	2	26924018	G	C	0.0356133	-0.0375	0.0035	26.0593	20.9771	0.1422	na	na	na	OTOF;CIB4;KCNK3;SLC35F6;CENPA;DPYSL5;OST4;EMILIN1;KHK;CGREF1;ABHD1;PREB;PRR30;TCF23;SLC5A6	CIB4;KCNK3;SLC35F6;DPYSL5;OST4;EMILIN1;CGREF1;PREB;SLC5A6	PREB	KCNK3	KCNK3	na	CGREF1;HADHA;HADHB	PREB	KCNK3	na	na	na	KCNK3	PREB	ABHD1;CENPA;CGREF1;CIB4;DPYSL5;EMILIN1;KHK;OST4;OTOF;PRR30;SLC35F6;SLC5A6;TCF23
rs13394970	nonHDL	2	26929282	G	T	0.561793	0.0123	0.0015	15.6191	13.2853	0.02712	na	na	na	CIB4;KCNK3;SLC35F6;CENPA;OST4;EMILIN1;CGREF1;ABHD1;PREB;SLC5A6	KCNK3;SLC35F6;EMILIN1;SLC5A6	PREB	KCNK3	na	SLC5A6	CGREF1;HADHA;HADHB	PREB	na	na	na	na	na	KCNK3;PREB;SLC5A6	ABHD1;CENPA;CGREF1;CIB4;EMILIN1;OST4;SLC35F6
rs1260326	HDL	2	27730940	C	T	0.624192	0.004	0.0013	2.67954	7.6653	0.0006619	na	NRBP1	na	OST4;EMILIN1;CGREF1;SLC5A6;CAD;SLC30A3;DNAJC5G;TRIM54;UCN;MPV17;GTF3C2;EIF2B4;SNX17;ZNF513;PPM1G;NRBP1;KRTCAP3;IFT172;FNDC4;GCKR;C2orf16;ZNF512;CCDC121;GPN1;SUPT7L;SLC4A1AP;LINC01460;MRPL33;RBKS;BRE	EMILIN1;CAD;SLC30A3;DNAJC5G;UCN;GTF3C2;SNX17;ZNF513;PPM1G;NRBP1;KRTCAP3;IFT172;GCKR;C2orf16;LINC01460;RBKS;BRE	PREB	GCKR	GCKR;NRBP1;PPM1G;ZNF513;SNX17	GCKR	CGREF1;DNAJC5G;GCKR;MPV17	na	GCKR;NRBP1;PPM1G;ZNF513;SNX17	na	na	GCKR	NRBP1	PPM1G;SNX17;ZNF513	BRE;C2orf16;CAD;CCDC121;CGREF1;DNAJC5G;EIF2B4;EMILIN1;FNDC4;GPN1;GTF3C2;IFT172;KRTCAP3;LINC01460;MPV17;MRPL33;OST4;PREB;RBKS;SLC30A3;SLC4A1AP;SLC5A6;SUPT7L;TRIM54;UCN;ZNF512
rs1260326	LDL	2	27730940	C	T	0.624333	-0.0305	0.0013	120.997	113.318	0.003605	na	NRBP1	na	OST4;EMILIN1;CGREF1;SLC5A6;CAD;SLC30A3;DNAJC5G;TRIM54;UCN;MPV17;GTF3C2;EIF2B4;SNX17;ZNF513;PPM1G;NRBP1;KRTCAP3;IFT172;FNDC4;GCKR;C2orf16;ZNF512;CCDC121;GPN1;SUPT7L;SLC4A1AP;LINC01460;MRPL33;RBKS;BRE	EMILIN1;CAD;SLC30A3;DNAJC5G;UCN;GTF3C2;SNX17;ZNF513;PPM1G;NRBP1;KRTCAP3;IFT172;GCKR;C2orf16;LINC01460;RBKS;BRE	PREB	GCKR	GCKR;NRBP1;FNDC4;PPM1G	GCKR	CGREF1;DNAJC5G;GCKR;MPV17	na	GCKR;NRBP1;FNDC4;PPM1G	na	na	GCKR	NRBP1	FNDC4;PPM1G	BRE;C2orf16;CAD;CCDC121;CGREF1;DNAJC5G;EIF2B4;EMILIN1;GPN1;GTF3C2;IFT172;KRTCAP3;LINC01460;MPV17;MRPL33;OST4;PREB;RBKS;SLC30A3;SLC4A1AP;SLC5A6;SNX17;SUPT7L;TRIM54;UCN;ZNF512;ZNF513
rs1260326	logTG	2	27730940	C	T	0.623907	-0.1101	0.0013	1559.58	1472.16	0.01408	na	na	na	OST4;EMILIN1;KHK;CGREF1;ABHD1;PREB;PRR30;TCF23;SLC5A6;ATRAID;CAD;SLC30A3;DNAJC5G;TRIM54;UCN;MPV17;GTF3C2;EIF2B4;SNX17;ZNF513;PPM1G;NRBP1;KRTCAP3;IFT172;FNDC4;GCKR;C2orf16;ZNF512;CCDC121	OST4;EMILIN1;CGREF1;PREB;SLC5A6;ATRAID;CAD;SLC30A3;DNAJC5G;UCN;GTF3C2;EIF2B4;SNX17;ZNF513;PPM1G;NRBP1;KRTCAP3;IFT172;GCKR;C2orf16	PREB	GCKR	GCKR;ZNF513;NRBP1;PPM1G	GCKR	CGREF1;DNAJC5G;GCKR;MPV17	PREB	GCKR;ZNF513;NRBP1;PPM1G	na	na	GCKR	na	NRBP1;PPM1G;PREB;ZNF513	ABHD1;ATRAID;C2orf16;CAD;CCDC121;CGREF1;DNAJC5G;EIF2B4;EMILIN1;FNDC4;GTF3C2;IFT172;KHK;KRTCAP3;MPV17;OST4;PRR30;SLC30A3;SLC5A6;SNX17;TCF23;TRIM54;UCN;ZNF512
rs1260326	nonHDL	2	27730940	C	T	0.619445	-0.0591	0.0015	338.785	299.009	0.3225	na	NRBP1	na	OST4;EMILIN1;CGREF1;ABHD1;PREB;SLC5A6;ATRAID;CAD;SLC30A3;DNAJC5G;TRIM54;UCN;MPV17;GTF3C2;EIF2B4;SNX17;ZNF513;PPM1G;NRBP1;KRTCAP3;IFT172;FNDC4;GCKR;C2orf16;ZNF512;CCDC121;GPN1;SUPT7L;SLC4A1AP;LINC01460;MRPL33;RBKS;BRE	EMILIN1;SLC5A6;ATRAID;CAD;SLC30A3;DNAJC5G;UCN;GTF3C2;EIF2B4;SNX17;ZNF513;PPM1G;NRBP1;KRTCAP3;IFT172;GCKR;C2orf16;CCDC121;LINC01460;RBKS;BRE	PREB	GCKR	GCKR;NRBP1;PPM1G;SNX17	GCKR	CGREF1;DNAJC5G;GCKR;MPV17	PREB	GCKR;NRBP1;PPM1G;SNX17	na	na	GCKR	NRBP1	PPM1G;PREB;SNX17	ABHD1;ATRAID;BRE;C2orf16;CAD;CCDC121;CGREF1;DNAJC5G;EIF2B4;EMILIN1;FNDC4;GPN1;GTF3C2;IFT172;KRTCAP3;LINC01460;MPV17;MRPL33;OST4;RBKS;SLC30A3;SLC4A1AP;SLC5A6;SUPT7L;TRIM54;UCN;ZNF512;ZNF513
rs1260326	TC	2	27730940	C	T	0.623715	-0.0603	0.0013	468.964	460.508	0.001422	na	TRIM54;GPN1;KRTCAP3;C2orf16;IFT172	GPN1	OST4;EMILIN1;CGREF1;ABHD1;PREB;TCF23;SLC5A6;ATRAID;CAD;SLC30A3;DNAJC5G;TRIM54;UCN;MPV17;GTF3C2;EIF2B4;SNX17;ZNF513;PPM1G;NRBP1;KRTCAP3;IFT172;FNDC4;GCKR;C2orf16;ZNF512;CCDC121;GPN1;SUPT7L;SLC4A1AP;LINC01460;MRPL33	EMILIN1;CGREF1;PREB;SLC5A6;ATRAID;CAD;SLC30A3;DNAJC5G;UCN;GTF3C2;EIF2B4;SNX17;ZNF513;PPM1G;NRBP1;KRTCAP3;IFT172;GCKR;C2orf16;CCDC121;GPN1;LINC01460	KHK	GCKR	GCKR;NRBP1;PPM1G;SNX17;ZNF513	GCKR	CGREF1;DNAJC5G;GCKR;MPV17	na	GCKR;NRBP1;PPM1G;SNX17;ZNF513	na	na	GCKR	na	C2orf16;GPN1;IFT172;KRTCAP3;NRBP1;PPM1G;SNX17;TRIM54;ZNF513	ABHD1;ATRAID;CAD;CCDC121;CGREF1;DNAJC5G;EIF2B4;EMILIN1;FNDC4;GTF3C2;KHK;LINC01460;MPV17;MRPL33;OST4;PREB;SLC30A3;SLC4A1AP;SLC5A6;SUPT7L;TCF23;UCN;ZNF512
rs34588907	TC	2	29133905	G	C	0.197955	0.0086	0.0016	7.11587	7.44981	0.0007007	na	AC104695.2	na	WDR43;FAM179A	WDR43;FAM179A	na	WDR43	WDR43	na	na	na	WDR43	na	na	na	WDR43	na	AC104695.2;FAM179A
rs13389106	HDL	2	30480750	G	T	0.20067	-0.0115	0.0015	13.7532	9.0493	0.7175	na	LBH	LBH	na	na	na	LBH	na	na	LCLAT1	na	na	na	na	na	na	LBH	na
rs62142080	TC	2	32182528	C	T	0.399376	-0.0084	0.0013	9.98446	7.66521	0.3148	na	na	na	na	na	BIRC6	MEMO1	SRD5A2	na	na	na	na	na	na	na	na	na	BIRC6;MEMO1;SRD5A2
rs3755303	HDL	2	42590122	G	C	0.323343	0.0091	0.0013	11.5918	8.02235	0.08644	na	AC083949.1	AC083949.1	COX7A2L	na	PKDCC	COX7A2L	EML4	COX7A2L;EML4	na	na	EML4	na	na	na	COX7A2L	EML4	AC083949.1;PKDCC
rs745763	nonHDL	2	43455654	C	T	0.176693	0.0196	0.002	21.9485	19.2452	0.0395	na	DYNC2LI1	na	LINC01126;THADA	THADA	ZFP36L2	THADA	na	na	na	na	na	na	na	na	na	THADA	DYNC2LI1;LINC01126;ZFP36L2
rs58839393	logTG	2	43490619	T	A	0.172486	0.0143	0.0017	16.3937	12.465	0.5331	na	LINC01126;THADA;AC010883.1	LINC01126	ZFP36L2;LINC01126;THADA	ZFP36L2;LINC01126;THADA	ZFP36L2	THADA	na	THADA	na	ZFP36L2	na	na	na	THADA	na	LINC01126;ZFP36L2	AC010883.1
rs12468394	LDL	2	43561161	C	A	0.513268	-0.0138	0.0013	25.5973	21.6324	0.5636	ABCG5	ABCG8;AC011242.1;ABCG5	na	LINC01126;THADA;PLEKHH2;DYNC2LI1;ABCG5;ABCG8	THADA;PLEKHH2;ABCG5;ABCG8	ABCG5	THADA	na	ABCG5	na	ABCG5	na	na	na	ABCG5	na	ABCG8;THADA	AC011242.1;DYNC2LI1;LINC01126;PLEKHH2
rs12468394	TC	2	43561161	C	A	0.51809	-0.0126	0.0012	25.0636	19.5885	0.2948	ABCG5	ABCG8;AC011242.1;ABCG5	na	LINC01126;THADA;DYNC2LI1;ABCG5;ABCG8	THADA;ABCG5;ABCG8	ABCG5	THADA	THADA	ABCG5	na	ABCG5	THADA	na	na	ABCG5	THADA	ABCG8	AC011242.1;DYNC2LI1;LINC01126
rs4245791	LDL	2	44074431	C	T	0.281079	0.069	0.0014	529.259	487.896	0.0002378	ABCG5	ABCG8;AC011242.1	na	THADA;PLEKHH2;DYNC2LI1;ABCG5;ABCG8	THADA;PLEKHH2;ABCG5;ABCG8	ABCG5	ABCG8	ABCG8	ABCG8;ABCG5;LRPPRC	ABCG8;SLC3A1	ABCG5	ABCG8	na	ABCG8	na	ABCG5	na	AC011242.1;DYNC2LI1;LRPPRC;PLEKHH2;THADA
rs4245791	logTG	2	44074431	C	T	0.280994	0.0103	0.0014	12.7261	9.01683	0.5872	ABCG5	THADA;AC010883.1	AC010883.1	THADA;ABCG5;ABCG8	THADA;ABCG5;ABCG8	ABCG5	ABCG8	ABCG8	THADA	ABCG8;SLC3A1	ABCG5	ABCG8	na	na	na	ABCG8;THADA	ABCG5	AC010883.1
rs4245791	nonHDL	2	44074431	C	T	0.280939	0.07	0.0017	369.886	350.771	2.8e-05	ABCG5	ABCG8	na	THADA;DYNC2LI1;ABCG5;ABCG8	THADA;ABCG5;ABCG8	ABCG5	ABCG8	ABCG8	ABCG8;ABCG5	ABCG8;SLC3A1	ABCG5	ABCG8	na	ABCG8	na	ABCG5	na	DYNC2LI1;THADA
rs4245791	TC	2	44074431	C	T	0.281967	0.064	0.0014	455.552	435.293	0.01616	ABCG5	AC011242.1;ABCG8	na	THADA;DYNC2LI1;ABCG5;ABCG8	THADA;ABCG5;ABCG8	ABCG5	ABCG8	ABCG8	ABCG8;ABCG5	ABCG8;SLC3A1	ABCG5	ABCG8	na	ABCG8	na	ABCG5	na	AC011242.1;DYNC2LI1;THADA
rs556971810	nonHDL	2	44663206	T	A	0.989502	0.0933	0.0092	23.441	19.1055	0.3414	na	na	na	na	na	SLC3A1	CAMKMT	na	na	SLC3A1	na	na	na	na	na	na	na	CAMKMT;SLC3A1
rs556971810	TC	2	44663206	T	A	0.990494	0.0945	0.008	31.4731	25.5414	0.3245	na	na	na	na	na	SLC3A1	CAMKMT	na	na	SLC3A1	na	na	na	na	na	na	na	CAMKMT;SLC3A1
rs140879085	LDL	2	44663302	C	T	0.990103	0.0957	0.0073	38.5374	33.3622	0.1498	na	na	na	na	na	SLC3A1	CAMKMT	SLC3A1	LRPPRC	SLC3A1	na	na	na	na	na	na	SLC3A1	CAMKMT;LRPPRC
rs12712955	LDL	2	46166321	G	A	0.470997	-0.012	0.0013	19.5707	15.919	0.681	na	AC016722.2	na	PRKCE	PRKCE	PRKCE	PRKCE	na	na	na	PRKCE	na	na	na	na	PRKCE	na	AC016722.2
rs12712955	nonHDL	2	46166321	G	A	0.472083	-0.0102	0.0015	10.9804	7.6956	0.5101	na	PRKCE;AC016722.2	PRKCE	PRKCE	PRKCE	PRKCE	PRKCE	na	EPAS1	na	PRKCE	na	na	na	PRKCE	na	na	AC016722.2;EPAS1
rs12712955	TC	2	46166321	G	A	0.472054	-0.0116	0.0012	21.3791	15.9556	0.5395	na	AC016722.2	na	PRKCE	PRKCE	PRKCE	PRKCE	na	na	na	PRKCE	na	na	na	na	PRKCE	na	AC016722.2
rs17326656	HDL	2	48962291	G	T	0.784934	0.0152	0.0015	23.4056	17.52	0.4137	na	LHCGR;MSH6	na	na	na	na	STON1-GTF2A1L	LHCGR	na	na	na	LHCGR	na	na	na	na	LHCGR	MSH6;STON1-GTF2A1L
rs17326656	logTG	2	48962291	G	T	0.785045	-0.0119	0.0015	14.6709	10.1458	0.4819	na	LHCGR	na	LHCGR	LHCGR	na	STON1-GTF2A1L	LHCGR	na	na	na	LHCGR	na	na	na	LHCGR	na	STON1-GTF2A1L
rs2253760	HDL	2	54033988	G	C	0.429224	0.0105	0.0013	15.1777	11.5563	0.2032	na	na	na	na	na	PSME4	GPR75-ASB3	PSME4;GPR75-ASB3	na	na	na	na	na	na	na	na	GPR75-ASB3;PSME4	na
rs10460509	HDL	2	58772377	T	A	0.531889	-0.0101	0.0013	14.1026	12.6596	0.02291	na	na	na	na	na	na	FANCL	na	na	na	na	na	na	na	na	na	na	FANCL
rs17615494	logTG	2	58950363	G	T	0.714182	-0.0099	0.0014	11.8143	9.71077	0.1675	na	na	na	na	na	na	FANCL	na	na	na	na	na	na	na	na	na	na	FANCL
rs35603314	HDL	2	59293596	C	A	0.676291	-0.009	0.0014	9.89005	7.31391	0.3168	na	na	na	na	na	na	na	na	na	na	na	na	na	na	na	na	na	na
rs921153	TC	2	61563408	G	A	0.826207	0.0107	0.0016	10.6439	8.40673	0.04612	na	na	na	PUS10;PEX13;XPO1	PUS10;PEX13	XPO1	USP34	XPO1;USP34;AHSA2	na	PUS10	XPO1	XPO1;USP34	na	na	na	XPO1	USP34	AHSA2;PEX13;PUS10
rs2166720	nonHDL	2	61577435	C	T	0.172545	-0.0123	0.002	9.11079	7.44205	0.153	na	na	na	na	na	XPO1	USP34	AHSA2;USP34;XPO1	na	PUS10	na	USP34	na	na	na	na	USP34;XPO1	AHSA2
rs766448	logTG	2	61735446	C	T	0.552199	0.01	0.0013	13.8401	10.3784	0.4264	na	XPO1;USP34;AC016747.3	XPO1	USP34;XPO1	USP34;XPO1	XPO1	XPO1	USP34;XPO1	na	PUS10	XPO1	USP34;XPO1	na	XPO1	na	USP34	na	AC016747.3
rs360804	LDL	2	62939397	G	A	0.696095	0.0225	0.0014	57.3929	53.2628	0.0863	na	na	na	TMEM17;EHBP1;OTX1;WDPCP	TMEM17;EHBP1;OTX1	na	EHBP1	na	na	na	na	na	na	na	na	na	EHBP1	OTX1;TMEM17;WDPCP
rs189671	nonHDL	2	62959308	T	A	0.689707	0.023	0.0016	46.1292	42.6044	0.009573	na	na	na	EHBP1;OTX1;WDPCP	EHBP1;OTX1	na	EHBP1	na	na	na	na	na	na	na	na	na	EHBP1	OTX1;WDPCP
rs78784525	TC	2	62978981	G	T	0.684296	0.0188	0.0013	46.6737	41.8865	0.001246	na	na	na	TMEM17;EHBP1;OTX1;WDPCP	EHBP1;OTX1	na	EHBP1	na	na	na	na	na	na	na	na	na	EHBP1	OTX1;TMEM17;WDPCP
rs954680	nonHDL	2	64913045	G	C	0.716132	0.0124	0.0017	12.522	12.2516	0.0006025	na	na	na	SERTAD2	SERTAD2	na	SERTAD2	SERTAD2	RAB1A	SERTAD2	na	SERTAD2	na	na	na	SERTAD2	na	RAB1A
rs1477034	LDL	2	64923808	C	T	0.277869	-0.0118	0.0014	16.456	12.2149	0.5316	na	na	na	SERTAD2	na	na	SERTAD2	na	na	SERTAD2	na	na	na	na	na	na	SERTAD2	na
rs1477034	TC	2	64923808	C	T	0.270677	-0.0147	0.0014	25.0636	20.5397	0.8989	na	na	na	SERTAD2;AC007365.3	SERTAD2;AC007365.3	AFTPH	SERTAD2	SERTAD2	RAB1A	SERTAD2	na	SERTAD2	na	na	na	SERTAD2	na	AC007365.3;AFTPH;RAB1A
rs2540949	HDL	2	65284231	T	A	0.381143	0.0151	0.0013	30.4631	26.4657	0.2955	na	CEP68;RAB1A	CEP68	SERTAD2	na	SPRED2	CEP68	na	na	SERTAD2	na	na	na	na	na	na	CEP68	RAB1A;SERTAD2;SPRED2
rs2252867	logTG	2	65296280	C	T	0.372865	-0.0188	0.0013	46.6737	41.3822	0.6246	na	CEP68;RAB1A	CEP68	SERTAD2;AC007880.1;CEP68;RAB1A;SPRED2;AC012370.3	CEP68;RAB1A;SPRED2	SPRED2	CEP68	CEP68	na	SERTAD2	SPRED2	CEP68	na	na	CEP68	na	RAB1A;SPRED2	AC007880.1;AC012370.3;SERTAD2
rs906578	TC	2	65601600	C	A	0.602121	0.0116	0.0012	21.3791	15.6632	0.4858	na	na	na	SPRED2;AC012370.3;RP11-418H16.1	SPRED2	na	SPRED2	na	RAB1A	na	na	na	na	na	na	na	SPRED2	AC012370.3;RAB1A;RP11-418H16.1
rs2280334	logTG	2	66665146	C	T	0.644185	-0.01	0.0013	13.8401	10.696	0.1983	na	MEIS1-AS3	na	na	na	MEIS1	MEIS1	MEIS1	na	na	MEIS1	MEIS1	na	na	na	MEIS1	na	MEIS1-AS3
rs1519103	HDL	2	66677881	G	T	0.356063	-0.0106	0.0013	15.4528	10.4228	0.8163	na	MEIS1-AS3	na	na	na	MEIS1	MEIS1	na	na	na	MEIS1	na	na	na	na	na	MEIS1	MEIS1-AS3
rs6546564	HDL	2	70233392	C	T	0.57057	-0.009	0.0013	11.3546	7.62873	0.3913	na	FAM136A	na	ASPRV1;C2orf42;TIA1;PCYOX1;SNRPG;FAM136A	C2orf42;SNRPG;FAM136A	AAK1	ASPRV1	PCBP1;PCYOX1;TIA1	na	na	na	PCYOX1;TIA1	na	na	na	na	ASPRV1;FAM136A;PCYOX1;TIA1	AAK1;C2orf42;PCBP1;SNRPG
rs2592182	LDL	2	70449776	G	A	0.450574	0.0108	0.0013	16.0106	12.294	0.1924	na	FAM136A;PCYOX1;C2orf42	na	ASPRV1;C2orf42;TIA1;PCYOX1;SNRPG;FAM136A	C2orf42;SNRPG;FAM136A	ADD2	C2orf42	PCYOX1;PCBP1	na	na	na	PCYOX1	na	na	na	C2orf42;PCYOX1	FAM136A	ADD2;ASPRV1;PCBP1;SNRPG;TIA1
rs2706770	TC	2	70471899	G	A	0.454866	0.0136	0.0012	29.0471	21.8467	0.1682	na	FAM136A;C2orf42;PCYOX1	na	ASPRV1;PCBP1;C2orf42;TIA1;PCYOX1;SNRPG;FAM136A	ASPRV1;PCBP1;C2orf42;SNRPG;FAM136A	MXD1	C2orf42	PCBP1;PCYOX1;TIA1	na	na	na	PCBP1;PCYOX1;TIA1	na	na	na	C2orf42;PCYOX1	FAM136A;PCBP1;TIA1	ASPRV1;MXD1;SNRPG
rs55634460	nonHDL	2	70511784	G	T	0.442676	0.0101	0.0015	10.7804	8.34593	0.09751	na	FAM136A;C2orf42;PCYOX1	na	C2orf42;PCYOX1;SNRPG;FAM136A	SNRPG	ADD2	SNRPG	PCYOX1;PCBP1	na	na	na	PCYOX1	na	na	na	PCYOX1	C2orf42;FAM136A;SNRPG	ADD2;PCBP1
rs2419077	TC	2	71648425	G	T	0.727705	0.0082	0.0014	8.32707	8.49611	0.001257	na	na	na	ZNF638;DYSF	ZNF638	DYSF	ZNF638	ZNF638	na	TEX261	DYSF	ZNF638	na	na	na	ZNF638	DYSF	na
rs10185019	logTG	2	72329685	C	T	0.622559	-0.0079	0.0013	8.91183	7.88376	0.002031	na	CYP26B1	CYP26B1	CYP26B1	CYP26B1	EXOC6B	CYP26B1	na	na	na	na	na	na	na	na	CYP26B1	na	EXOC6B
rs7608892	HDL	2	85542718	G	A	0.429972	-0.0102	0.0013	14.3676	11.6873	0.1564	na	na	na	MAT2A;VAMP8;VAMP5;TMEM150A;USP39	VAMP8;VAMP5;TMEM150A;USP39	TMEM150A	TGOLN2	RETSAT;TGOLN2;TCF7L1	TGOLN2	SFTPB;VAMP8	TMEM150A	TGOLN2	na	na	na	TGOLN2	TMEM150A	MAT2A;RETSAT;TCF7L1;USP39;VAMP5;VAMP8
rs58588820	TC	2	85874044	C	T	0.627066	0.0098	0.0013	13.3228	10.1158	0.1252	na	VAMP5;MAT2A;USP39;TMEM150A;RNF181	VAMP5;USP39	MAT2A;GGCX;VAMP8;VAMP5;TMEM150A;USP39	MAT2A;VAMP8;VAMP5;TMEM150A;USP39	TMEM150A	USP39	TMEM150A	TMEM150A;RNF181;VAMP5	SFTPB;ST3GAL5;VAMP8	TMEM150A	TMEM150A	na	TMEM150A	na	USP39;VAMP5	MAT2A;RNF181	GGCX;VAMP8
rs11887443	LDL	2	85879041	G	T	0.76171	0.0114	0.0016	11.9826	10.6273	0.000576	na	RNF181;C2orf68;VAMP5;USP39;TMEM150A	RNF181;VAMP5	MAT2A;VAMP8;VAMP5;TMEM150A;USP39	VAMP8;VAMP5;TMEM150A;USP39	TMEM150A	USP39	na	na	SFTPB;ST3GAL5;VAMP8	TMEM150A	na	na	na	na	TMEM150A;USP39	VAMP5	C2orf68;MAT2A;RNF181;VAMP8
rs308915	TC	2	86859298	C	A	0.511801	-0.0092	0.0013	11.8315	8.4571	0.8982	na	RNF103;AC015971.1	AC015971.1	CHMP3;RNF103	RNF103	RMND5A	CHMP3	KDM3A;RNF103	na	na	na	RNF103	na	na	na	RNF103	CHMP3	AC015971.1;KDM3A;RMND5A
rs2919872	nonHDL	2	88428571	C	T	0.574731	-0.0108	0.0015	12.2203	8.28142	0.5362	na	FABP1;IGKV1-12	FABP1	FABP1	FABP1	FABP1	FABP1	THNSL2	na	FABP1	FABP1	na	na	na	FABP1	na	na	IGKV1-12;THNSL2
rs4246598	LDL	2	88438050	C	A	0.563646	-0.0101	0.0013	14.1026	10.1945	0.8533	na	FABP1;IGKV1-12	FABP1	FABP1	FABP1	FABP1	FABP1	THNSL2	na	FABP1	FABP1	na	na	na	FABP1	na	na	IGKV1-12;THNSL2
rs4246598	TC	2	88438050	C	A	0.562988	-0.0094	0.0012	14.3232	10.5026	0.6414	na	FABP1;IGKV1-12	FABP1	FABP1	FABP1	FABP1	FABP1	na	na	FABP1	FABP1	na	na	na	FABP1	na	na	IGKV1-12
rs4851250	HDL	2	100729293	C	T	0.172232	0.0135	0.0017	14.6984	11.9984	0.1102	na	na	na	na	na	na	AFF3	na	na	na	na	na	na	na	na	na	na	AFF3
rs10171847	LDL	2	101631888	G	C	0.345522	-0.0123	0.0013	20.5179	15.8969	0.3406	na	na	na	RPL31;TBC1D8	RPL31	TBC1D8	RPL31	TBC1D8	TBC1D8	na	TBC1D8	TBC1D8	na	na	TBC1D8	na	RPL31	na
rs10171847	nonHDL	2	101631888	G	C	0.334093	-0.0125	0.0015	16.1046	12.2466	0.06925	na	na	na	RPL31;TBC1D8;RP11-299H21.1	RPL31	na	RPL31	TBC1D8	TBC1D8	na	na	TBC1D8	na	na	na	TBC1D8	RPL31	RP11-299H21.1
rs10171847	TC	2	101631888	G	C	0.339346	-0.0111	0.0012	19.6488	13.4208	0.4178	na	na	na	RPL31;TBC1D8	RPL31	TBC1D8	RPL31	TBC1D8	TBC1D8	na	TBC1D8	TBC1D8	na	na	TBC1D8	na	RPL31	na
rs2577619	LDL	2	109090267	G	C	0.803796	-0.0184	0.0016	29.8797	25.0758	0.5579	na	GCC2	na	SULT1C4;GCC2;LIMS1;RANBP2	SULT1C4;GCC2;LIMS1;RANBP2	na	GCC2	LIMS1	na	SLC5A7	na	LIMS1	na	na	na	GCC2	LIMS1	RANBP2;SULT1C4
rs1992172	nonHDL	2	109093836	G	A	0.190916	0.019	0.0019	22.817	18.5768	0.6373	na	GCC2	na	SULT1C4;GCC2;LIMS1	SULT1C4;GCC2	na	GCC2	LIMS1	na	SLC5A7	na	LIMS1	na	na	na	GCC2	LIMS1	SULT1C4
rs2718744	TC	2	109146017	T	A	0.835778	-0.0176	0.0016	27.4178	20.555	0.674	na	na	na	SULT1C4;GCC2;LIMS1;RANBP2	SULT1C4;GCC2;LIMS1;RANBP2	na	LIMS1	LIMS1	na	na	na	LIMS1	na	na	na	LIMS1	na	GCC2;RANBP2;SULT1C4
rs3789129	TC	2	111698040	C	A	0.193974	0.0109	0.0015	12.4336	8.88357	0.4605	na	na	na	na	na	na	ACOXL	na	na	na	na	na	na	na	na	na	na	ACOXL
rs3789112	HDL	2	111714577	C	T	0.722244	0.0102	0.0014	12.4949	9.0853	0.6025	na	na	na	na	na	BCL2L11	ACOXL	na	na	na	na	na	na	na	na	na	na	ACOXL;BCL2L11
rs6708784	logTG	2	111927379	G	A	0.471829	-0.0126	0.0013	21.488	18.7778	0.2389	na	AC108463.3;BCL2L11;ACOXL-AS1	na	BCL2L11;AC108463.1;RP11-181E10.3	BCL2L11	BCL2L11	BCL2L11	BCL2L11	na	na	BCL2L11	BCL2L11	na	BCL2L11	na	na	na	AC108463.1;AC108463.3;ACOXL-AS1;RP11-181E10.3
rs7583987	logTG	2	112763640	G	C	0.595991	-0.0086	0.0013	10.4311	7.97848	0.3421	na	na	na	TMEM87B	TMEM87B	MERTK	MERTK	MERTK	MERTK	na	MERTK	MERTK	na	na	MERTK	na	na	TMEM87B
rs6734238	LDL	2	113841030	G	A	0.38788	-0.0089	0.0013	11.12	7.97053	0.3596	na	na	na	IL1F10;IL1RN	IL1RN	SLC20A1	IL1F10	IL1RN	PAX8;RP11-65I12.1;PAX8-AS1	IL1RN;SLC20A1	na	IL1RN	na	na	na	na	IL1F10;IL1RN	PAX8;PAX8-AS1;RP11-65I12.1;SLC20A1
rs6734238	TC	2	113841030	G	A	0.388725	-0.0135	0.0013	24.5356	20.8516	0.2637	na	IL1F10	na	IL1B;IL36RN;IL1F10;IL1RN;PAX8	IL1B;IL1RN	PAX8	IL1F10	IL1RN	na	IL1RN;SLC20A1	PAX8	IL1RN	na	na	na	IL1F10	IL1RN;PAX8	IL1B;IL36RN
rs13398728	nonHDL	2	113842506	C	T	0.357263	-0.0117	0.0016	12.5813	9.69572	0.2599	na	na	na	IL1F10;IL1RN	IL1RN	SLC20A1	IL1F10	IL1RN	na	IL1RN;SLC20A1	na	IL1RN	na	na	na	na	IL1F10;IL1RN	SLC20A1
rs55709272	logTG	2	113867288	C	T	0.418772	-0.0091	0.0013	11.5918	9.7504	0.3376	na	IL1F10	na	IL1F10;IL1RN	IL1RN	IL1B	IL1RN	IL1RN	na	IL1RN;SLC20A1	na	IL1RN	na	na	na	IL1RN	IL1F10	IL1B
rs55938402	LDL	2	118843158	G	A	0.913354	0.0421	0.0023	74.1169	66.5646	0.3139	na	AC009303.4	AC009303.4	DDX18;AC009404.2;CCDC93;INSIG2	AC009404.2;INSIG2	na	INSIG2	INSIG2	na	na	na	INSIG2	na	na	na	INSIG2	na	AC009303.4;AC009404.2;CCDC93;DDX18
rs55938402	nonHDL	2	118843158	G	A	0.910548	0.0424	0.0027	54.8457	47.7586	0.5191	na	AC009303.4	AC009303.4	DDX18;AC009404.2;CCDC93;INSIG2	AC009404.2;INSIG2	na	INSIG2	INSIG2	na	na	na	INSIG2	na	na	na	INSIG2	na	AC009303.4;AC009404.2;CCDC93;DDX18
rs55938402	TC	2	118843158	G	A	0.912943	0.0376	0.0022	64.7608	55.2385	0.2163	na	AC009303.4	AC009303.4	DDX18;AC009404.2;CCDC93;INSIG2	AC009404.2;INSIG2	na	INSIG2	INSIG2	na	na	na	INSIG2	na	na	na	INSIG2	na	AC009303.4;AC009404.2;CCDC93;DDX18
rs78198921	logTG	2	119749146	G	C	0.0130157	0.0439	0.0056	14.3438	11.4209	0.7818	na	na	na	na	na	na	MARCO	MARCO	MARCO;DBI	DBI	na	MARCO	na	na	na	MARCO	na	DBI
rs17050272	LDL	2	121306440	G	A	0.601221	0.0219	0.0013	62.9509	54.7289	0.0852	na	na	na	INHBB;AC073257.2	INHBB;AC073257.2	na	LINC01101	na	na	na	na	na	na	na	na	na	na	AC073257.2;INHBB;LINC01101
rs17050272	nonHDL	2	121306440	G	A	0.587825	0.0228	0.0016	45.3484	41.7425	0.4077	na	na	na	INHBB;AC073257.2	INHBB;AC073257.2	na	LINC01101	na	na	na	na	na	na	na	na	na	na	AC073257.2;INHBB;LINC01101
rs17050272	TC	2	121306440	G	A	0.601221	0.0191	0.0013	48.1414	42.2884	0.2745	na	na	na	INHBB;AC073257.2	INHBB;AC073257.2	na	LINC01101	na	na	na	na	na	na	na	na	na	na	AC073257.2;INHBB;LINC01101
rs954244	logTG	2	121309231	G	C	0.250657	0.0162	0.0014	30.2402	23.4198	0.427	na	AC073257.2	AC073257.2	INHBB;AC073257.2	INHBB;AC073257.2	na	LINC01101	GLI2	na	na	na	na	na	na	na	na	AC073257.2	GLI2;INHBB;LINC01101
rs11688682	HDL	2	121347612	G	C	0.767549	-0.0173	0.0017	23.5976	19.1645	0.3976	na	INHBB	INHBB	INHBB;AC073257.2	INHBB;AC073257.2	na	LINC01101	na	na	na	na	na	na	na	na	na	INHBB	AC073257.2;LINC01101
rs563563230	LDL	2	122797791	G	C	0.000140787	-0.4657	0.086	7.2129	8.29673	1	na	na	na	na	na	na	TSN	na	na	na	na	na	na	na	na	na	na	TSN
rs60668151	TC	2	134874008	G	A	0.244396	0.0093	0.0014	10.5119	8.01355	0.04185	na	TMEM163;CCNT2-AS1;VDAC2P4;CCNT2	TMEM163	MGAT5;TMEM163	MGAT5;TMEM163	na	MGAT5	ACMSD	na	na	na	na	na	na	na	na	MGAT5;TMEM163	ACMSD;CCNT2;CCNT2-AS1;VDAC2P4
rs2460382	LDL	2	135014116	G	A	0.230011	-0.0118	0.0015	14.4386	11.4623	0.1776	na	CCNT2;TMEM163;CCNT2-AS1;MGAT5	na	MGAT5;TMEM163	TMEM163	na	MGAT5	na	na	na	na	na	na	na	na	MGAT5	TMEM163	CCNT2;CCNT2-AS1
rs1375131	LDL	2	135954797	C	T	0.385062	0.0191	0.0017	28.5629	24.9858	0.6508	na	MCM6	na	TMEM163;ACMSD;CCNT2;MAP3K19;RAB3GAP1;ZRANB3;R3HDM1	TMEM163;CCNT2	na	ZRANB3	na	ACMSD	ACMSD	na	na	na	na	na	na	ACMSD;ZRANB3	CCNT2;MAP3K19;MCM6;R3HDM1;RAB3GAP1;TMEM163
rs1375131	nonHDL	2	135954797	C	T	0.330361	0.0165	0.002	15.8003	11.8378	0.5045	na	MCM6	na	ACMSD	na	na	ZRANB3	na	na	ACMSD	na	na	na	na	na	na	na	ACMSD;MCM6;ZRANB3
rs1375131	TC	2	135954797	C	T	0.381762	0.0207	0.0016	37.5583	31.0587	0.1439	na	MCM6	na	TMEM163;ACMSD;CCNT2;MAP3K19;RAB3GAP1;ZRANB3;R3HDM1	TMEM163;CCNT2;ZRANB3;R3HDM1	na	ZRANB3	na	na	ACMSD	na	na	na	na	na	na	ZRANB3	ACMSD;CCNT2;MAP3K19;MCM6;R3HDM1;RAB3GAP1;TMEM163
rs3739020	HDL	2	136602491	G	T	0.256986	0.014	0.0015	19.9889	20.3559	0.0001296	na	MCM6	na	ZRANB3;R3HDM1;UBXN4;LCT;MCM6;DARS	UBXN4;MCM6;DARS	UBXN4	MCM6	RAB3GAP1;MCM6	LCT;R3HDM1	na	UBXN4	MCM6	na	na	MCM6	na	LCT;R3HDM1;UBXN4	DARS;RAB3GAP1;ZRANB3
rs950176	TC	2	136898078	G	A	0.366877	0.0094	0.0014	10.7236	10.2531	0.002547	na	MCM6	MCM6	R3HDM1;UBXN4;LCT;MCM6;DARS	R3HDM1;UBXN4;MCM6;DARS	na	CXCR4	CXCR4	R3HDM1;UBXN4	na	na	CXCR4	na	na	na	na	CXCR4;MCM6;R3HDM1;UBXN4	DARS;LCT
rs35825582	TC	2	144248762	G	A	0.543506	0.0095	0.0012	14.6127	11.2848	0.3879	na	na	na	na	na	na	ARHGAP15	ARHGAP15	na	na	na	ARHGAP15	na	na	na	na	ARHGAP15	na
rs6430090	logTG	2	146347459	G	A	0.608859	-0.0107	0.0013	15.7305	11.7937	0.8056	na	na	na	na	na	na	na	na	na	na	na	na	na	na	na	na	na	na
rs7571848	HDL	2	146353184	T	A	0.389628	-0.0086	0.0013	10.4311	7.69681	0.3931	na	na	na	na	na	na	na	na	na	na	na	na	na	na	na	na	na	na
rs12614487	LDL	2	158434569	C	T	0.907632	0.0282	0.0022	36.887	31.5672	0.5216	na	na	na	ACVR1C	ACVR1C	na	ACVR1C	na	na	na	na	na	na	na	na	na	ACVR1C	na
rs10164853	nonHDL	2	158481992	G	A	0.098208	-0.0301	0.0026	30.268	25.7902	0.1224	na	na	na	ACVR1C	ACVR1C	ACVR1	ACVR1C	na	na	na	na	na	na	na	na	na	ACVR1C	ACVR1
rs10164853	TC	2	158481992	G	A	0.103427	-0.03	0.0021	45.5708	39.8949	0.04273	na	ACVR1C	na	ACVR1C	ACVR1C	na	ACVR1C	na	na	na	na	na	na	na	na	ACVR1C	na	na
rs11900786	logTG	2	158508271	C	T	0.858964	0.0124	0.0018	11.25	7.89037	0.5829	na	ACVR1C	ACVR1C	ACVR1C	ACVR1C	ACVR1	ACVR1C	na	na	na	na	na	na	na	na	ACVR1C	na	ACVR1
rs2509902	HDL	2	158514969	C	T	0.862389	-0.0131	0.0018	12.4693	9.36449	0.1947	na	ACVR1C	ACVR1C	ACVR1C	ACVR1C	na	ACVR1C	na	na	na	na	na	na	na	na	ACVR1C	na	na
rs10170600	logTG	2	161118687	C	T	0.720149	0.0105	0.0014	13.1951	9.99648	0.3088	na	ITGB6	na	CD302;PLA2R1;ITGB6	ITGB6	na	ITGB6	RBMS1;ITGB6	na	na	na	ITGB6	na	na	ITGB6	na	na	CD302;PLA2R1;RBMS1
rs62189714	HDL	2	162966841	C	A	0.549716	-0.0078	0.0013	8.70483	8.21394	0.001225	na	DPP4	na	na	na	na	GCG	na	IFIH1	na	na	na	na	na	na	na	na	DPP4;GCG;IFIH1
rs2111485	TC	2	163110536	G	A	0.552799	-0.0082	0.0013	9.54787	7.30855	0.3333	na	na	na	na	na	na	FAP	GCA	IFIH1;FAP;GCA;KCNH7;DPP4	na	na	GCA	na	na	na	na	FAP;GCA	DPP4;IFIH1;KCNH7
rs10184004	LDL	2	165508389	C	T	0.590902	0.01	0.0013	13.8401	10.6123	0.04797	na	AC019197.1;SCN2A	na	na	na	na	COBLL1	COBLL1	na	na	na	COBLL1	na	na	na	na	COBLL1	AC019197.1;SCN2A
rs10184004	nonHDL	2	165508389	C	T	0.614254	0.0191	0.0016	32.1223	29.6845	0.114	na	SCN2A;AC019197.1	na	GRB14;COBLL1	COBLL1	na	COBLL1	COBLL1	na	na	na	COBLL1	na	na	na	COBLL1	na	AC019197.1;GRB14;SCN2A
rs10184004	TC	2	165508389	C	T	0.602544	0.0084	0.0013	9.98446	8.39829	0.02377	na	AC019197.1;SCN2A	na	na	na	na	COBLL1	COBLL1	na	na	na	COBLL1	na	na	na	na	COBLL1	AC019197.1;SCN2A
rs75265117	HDL	2	165518799	G	C	0.120857	0.0427	0.002	100.409	90.1207	0.3942	na	GRB14	na	na	na	COBLL1	COBLL1	COBLL1	COBLL1	na	COBLL1	COBLL1	na	na	COBLL1	na	na	GRB14
rs13389219	logTG	2	165528876	C	T	0.602163	0.0325	0.0013	137.214	124.956	0.1435	na	AC019197.1	na	GRB14;COBLL1;SLC38A11	GRB14;COBLL1	na	COBLL1	COBLL1	na	na	na	COBLL1	na	na	na	COBLL1	na	AC019197.1;GRB14;SLC38A11
rs531328	logTG	2	169700838	C	A	0.640411	0.0092	0.0013	11.8315	8.27373	0.4026	na	na	na	NOSTRIN;SPC25;G6PC2	NOSTRIN	na	NOSTRIN	na	NOSTRIN;SPC25	ABCB11;CERS6;G6PC2	na	na	na	na	na	NOSTRIN	SPC25	G6PC2
rs10176901	LDL	2	169830661	G	A	0.400413	0.0212	0.0013	59.0604	54.8561	0.2424	na	na	na	ABCB11;DHRS9	ABCB11	LRP2	ABCB11	ABCB11	ABCB11	ABCB11;CERS6;G6PC2	na	ABCB11	na	na	ABCB11	na	na	DHRS9;LRP2
rs28689500	TC	2	169831376	G	T	0.39521	0.0235	0.0012	84.6685	71.0219	0.7479	na	na	na	SPC25;G6PC2;ABCB11;DHRS9	ABCB11	ABCB11	ABCB11	ABCB11	na	ABCB11;CERS6;G6PC2	ABCB11	ABCB11	na	na	ABCB11	na	na	DHRS9;G6PC2;SPC25
rs66491446	nonHDL	2	169832362	G	A	0.387874	0.0226	0.0015	50.5714	42.4568	0.7262	na	na	na	ABCB11;DHRS9	ABCB11	na	ABCB11	ABCB11	ABCB11	ABCB11;CERS6;G6PC2	na	ABCB11	na	na	ABCB11	na	na	DHRS9
rs1420377	logTG	2	171635168	G	A	0.350113	0.0088	0.0013	10.8878	8.18306	0.4017	na	AC007405.3	na	AC007405.4;LINC01124;SP5;AC007405.6;ERICH2;GAD1	AC007405.4;AC007405.6;GAD1	GORASP2	ERICH2	na	SP5;LINC01124	na	na	na	na	na	na	na	ERICH2;LINC01124;SP5	AC007405.3;AC007405.4;AC007405.6;GAD1;GORASP2
rs1866631	HDL	2	174075761	G	A	0.411853	0.0095	0.0013	12.5658	9.61645	0.3165	na	na	na	na	na	na	MLTK	na	na	na	na	na	na	na	na	na	na	MLTK
rs4894128	logTG	2	180707310	C	T	0.291505	-0.0094	0.0014	10.7236	7.68851	0.3898	na	na	na	ZNF385B	na	na	ZNF385B	na	na	na	na	na	na	na	na	na	ZNF385B	na
rs16829016	HDL	2	188292458	C	T	0.706199	-0.0104	0.0014	12.9595	8.82664	0.9047	na	na	na	na	na	na	CALCRL	TFPI;CALCRL	AC007319.1;TFPI	na	na	CALCRL;TFPI	na	na	na	na	CALCRL;TFPI	AC007319.1
rs1155060	TC	2	191566439	G	A	0.580687	0.0082	0.0012	11.0811	7.70596	0.4263	na	NAB1	na	NAB1	NAB1	STAT1	NAB1	na	STAT4	na	na	na	na	na	na	NAB1	na	STAT1;STAT4
rs2110690	logTG	2	202185132	G	A	0.491293	0.0091	0.0013	11.5918	8.76218	0.5301	na	ALS2CR12;CASP8	ALS2CR12	CASP10;CASP8;ALS2CR12;TRAK2;STRADB;ALS2CR11;TMEM237	CASP10;CASP8;ALS2CR12;TRAK2;STRADB	CLK1	ALS2CR12	ALS2CR12;CASP8	ALS2CR12	PPIL3;STRADB;TMEM237	na	ALS2CR12;CASP8	na	ALS2CR12	na	CASP8	na	ALS2CR11;CASP10;CLK1;STRADB;TMEM237;TRAK2
rs2349075	TC	2	202223566	G	A	0.623477	0.0077	0.0012	9.85608	7.41861	0.03919	na	na	na	CASP8;ALS2CR12;TRAK2;STRADB;ALS2CR11;TMEM237	CASP8;ALS2CR12;TRAK2	CFLAR	ALS2CR12	CASP8;ALS2CR12;TRAK2	ALS2CR12;CASP10;AC005037.6;MTND5P25;MTND4P23;ALS2;AC007279.2	PPIL3;STRADB;TMEM237	na	CASP8;ALS2CR12;TRAK2	na	na	ALS2CR12	na	CASP8;TRAK2	AC005037.6;AC007279.2;ALS2;ALS2CR11;CASP10;CFLAR;MTND4P23;MTND5P25;STRADB;TMEM237
rs62189254	nonHDL	2	202314833	C	T	0.42831	-0.0092	0.0015	9.06522	8.07005	0.0164	na	STRADB	na	CASP8;ALS2CR12;TRAK2;STRADB;ALS2CR11;TMEM237	CASP8;ALS2CR12;TRAK2;STRADB	CASP8	TRAK2	ALS2CR12	STRADB;TRAK2;ALS2CR12	STRADB;TMEM237	CASP8	ALS2CR12	na	na	na	ALS2CR12;STRADB;TRAK2	CASP8	ALS2CR11;TMEM237
rs6435149	nonHDL	2	203271267	C	T	0.254864	0.0227	0.0017	39.9436	33.5255	0.9291	na	BMPR2;AC064836.2	BMPR2	SUMO1;NOP58;RP11-686O6.1;RP11-686O6.2;BMPR2;FAM117B;ICA1L;WDR12	NOP58;RP11-686O6.1;RP11-686O6.2;BMPR2;FAM117B;ICA1L;WDR12	SUMO1	BMPR2	na	na	FAM117B	SUMO1	na	na	na	na	BMPR2	SUMO1	AC064836.2;FAM117B;ICA1L;NOP58;RP11-686O6.1;RP11-686O6.2;WDR12
rs3731696	logTG	2	203431804	G	A	0.116633	0.0179	0.0019	20.3501	15.1295	0.2154	na	na	na	NOP58;RP11-686O6.1;RP11-686O6.2;BMPR2;FAM117B	NOP58;RP11-686O6.1;RP11-686O6.2;BMPR2;FAM117B	SUMO1	BMPR2	BMPR2;NOP58	na	FAM117B;NBEAL1	na	BMPR2;NOP58	na	na	na	BMPR2	NOP58	FAM117B;RP11-686O6.1;RP11-686O6.2;SUMO1
rs140974562	LDL	2	203460202	TGGCTCACGCCTGTA	T	0.74512	0.0224	0.0016	43.8072	39.2809	0.5585	na	na	na	SUMO1;NOP58;RP11-686O6.1;RP11-686O6.2;BMPR2;FAM117B;ICA1L;WDR12;CARF;NBEAL1	NOP58;RP11-686O6.1;RP11-686O6.2;BMPR2;FAM117B;ICA1L;WDR12;CARF;NBEAL1	SUMO1	BMPR2	na	na	FAM117B;NBEAL1	SUMO1	na	na	na	na	na	BMPR2;SUMO1	CARF;FAM117B;ICA1L;NBEAL1;NOP58;RP11-686O6.1;RP11-686O6.2;WDR12
rs113867238	TC	2	203495058	G	A	0.739381	0.0266	0.0014	79.7682	70.8989	0.8768	na	FAM117B	FAM117B	SUMO1;NOP58;RP11-686O6.1;RP11-686O6.2;BMPR2;FAM117B;ICA1L;WDR12;CARF;NBEAL1	NOP58;RP11-686O6.1;RP11-686O6.2;BMPR2;FAM117B;ICA1L;WDR12;CARF;NBEAL1	SUMO1	FAM117B	na	na	FAM117B;NBEAL1	SUMO1	na	na	na	na	FAM117B	SUMO1	BMPR2;CARF;ICA1L;NBEAL1;NOP58;RP11-686O6.1;RP11-686O6.2;WDR12
rs7581601	HDL	2	203497786	C	A	0.279979	-0.0179	0.0014	36.7054	29.1354	0.9055	na	FAM117B	FAM117B	SUMO1;NOP58;RP11-686O6.1;RP11-686O6.2;BMPR2;FAM117B;ICA1L;WDR12;CARF;NBEAL1	NOP58;RP11-686O6.1;RP11-686O6.2;BMPR2;FAM117B;ICA1L;WDR12;CARF;NBEAL1	SUMO1	FAM117B	FAM117B;BMPR2	na	FAM117B;NBEAL1	SUMO1	FAM117B;BMPR2	na	na	FAM117B	na	BMPR2;SUMO1	CARF;ICA1L;NBEAL1;NOP58;RP11-686O6.1;RP11-686O6.2;WDR12
rs2551657	HDL	2	208372913	G	T	0.193028	0.0125	0.0016	14.2513	9.72917	0.488	na	METTL21A;CCNYL1	METTL21A	na	na	KLF7	CREB1	CREB1	METTL21A	na	na	CREB1	na	na	na	na	CREB1;METTL21A	CCNYL1;KLF7
rs6740584	TC	2	208429351	C	T	0.453104	-0.0098	0.0012	15.4989	11.7106	0.05923	na	na	na	METTL21A;AC079767.4;CCNYL1	AC079767.4	CREB1	CREB1	CREB1	na	na	CREB1	CREB1	na	na	na	CREB1	na	AC079767.4;CCNYL1;METTL21A
rs1047891	HDL	2	211540507	C	A	0.698594	0.0159	0.0014	29.1653	24.0749	0.491	na	na	na	na	na	na	CPS1	CPS1	CPS1	ACADL	na	CPS1	na	na	na	CPS1	na	na
rs3791699	HDL	2	212274447	G	A	0.731851	0.0085	0.0014	8.89696	7.72361	0.008728	na	na	na	na	na	na	ERBB4	CPS1	na	na	na	na	na	na	na	na	na	CPS1;ERBB4
rs4416211	HDL	2	215377588	T	A	0.523642	0.0084	0.0013	9.98446	10.4744	0.0002758	na	FN1	na	na	na	na	VWC2L	na	na	ABCA12	na	na	na	na	na	na	na	FN1;VWC2L
rs1250258	nonHDL	2	216300185	C	T	0.255102	-0.0176	0.0017	24.3917	18.9308	0.7667	na	na	na	FN1;AC012462.2	FN1	FN1	FN1	FN1	AC012462.1;FN1	ABCA12	FN1	FN1	na	FN1	na	na	na	AC012462.1;AC012462.2
rs1250258	TC	2	216300185	C	T	0.249059	-0.0164	0.0014	30.9678	23.871	0.2359	na	na	na	FN1;AC012462.2	FN1	FN1	FN1	na	AC012462.1;FN1	ABCA12	FN1	na	na	na	FN1	na	na	AC012462.1;AC012462.2
rs1250259	LDL	2	216300482	T	A	0.248	-0.0171	0.0015	29.3787	24.9915	0.1425	na	na	na	FN1;AC012462.2	FN1	FN1	FN1	na	AC012462.1;FN1	ABCA12	FN1	na	na	na	FN1	na	na	AC012462.1;AC012462.2
rs10716631	LDL	2	219138170	G	T	0.536305	-0.0102	0.0014	12.4949	9.79823	0.2691	na	GPBAR1;TMBIM1;AAMP;AC021016.2	AAMP;TMBIM1;AC021016.2	CXCR1;ARPC2;GPBAR1;AAMP;PNKD;TMBIM1;USP37;RQCD1;ZNF142;BCS1L	ARPC2;GPBAR1;AAMP;PNKD;TMBIM1;RQCD1;BCS1L	VIL1	PNKD	na	PNKD;TMBIM1	CXCR2;GPBAR1;TTLL4	na	na	na	na	na	PNKD;TMBIM1	AAMP;GPBAR1	AC021016.2;ARPC2;BCS1L;CXCR1;RQCD1;USP37;VIL1;ZNF142
rs6707559	logTG	2	219142773	C	T	0.397942	0.009	0.0013	11.3546	10.151	0.03727	na	WNT6	WNT6	CXCR1;GPBAR1;AAMP;PNKD;TMBIM1;CTDSP1;VIL1;USP37;RQCD1;PLCD4;ZNF142;BCS1L;RNF25;STK36;TTLL4	GPBAR1;AAMP;PNKD;TMBIM1;VIL1;USP37;RQCD1;PLCD4;ZNF142;BCS1L;STK36;TTLL4	TNS1	PNKD	TMBIM1	na	CXCR2;GPBAR1;TTLL4	na	TMBIM1	na	na	na	na	PNKD;TMBIM1	AAMP;BCS1L;CTDSP1;CXCR1;GPBAR1;PLCD4;RNF25;RQCD1;STK36;TNS1;TTLL4;USP37;VIL1;WNT6;ZNF142
rs2382818	nonHDL	2	219155907	T	A	0.401967	0.0108	0.0015	12.2203	9.31932	0.2972	CYP27A1	TTLL4;TMBIM1	na	CXCR1;ARPC2;GPBAR1;AAMP;PNKD;TMBIM1;CTDSP1;VIL1;USP37;RQCD1;PLCD4;ZNF142;BCS1L;STK36;TTLL4;CYP27A1	ARPC2;GPBAR1;AAMP;PNKD;TMBIM1;VIL1;USP37;RQCD1;PLCD4;BCS1L;STK36;TTLL4;CYP27A1	CYP27A1	PNKD	TMBIM1;AAMP;ARPC2	STK36;ZNF142;PNKD;TMBIM1;TTLL4	CXCR2;CYP27A1;GPBAR1;TTLL4	CYP27A1	TMBIM1;AAMP;ARPC2	na	na	TMBIM1	PNKD;TTLL4	AAMP;ARPC2;CYP27A1;STK36;ZNF142	BCS1L;CTDSP1;CXCR1;GPBAR1;PLCD4;RQCD1;USP37;VIL1
rs145013566	TC	2	219162720	C	CA	0.472617	0.0115	0.0014	15.6707	12.8306	0.3071	CYP27A1	AC021016.2;TMBIM1;AAMP;GPBAR1	AC021016.2;TMBIM1;AAMP	CXCR2;CXCR1;ARPC2;GPBAR1;AAMP;PNKD;TMBIM1;VIL1;USP37;RQCD1;PLCD4;ZNF142;BCS1L;STK36;TTLL4;CYP27A1	CXCR2;ARPC2;GPBAR1;AAMP;PNKD;TMBIM1;VIL1;USP37;RQCD1;PLCD4;BCS1L;STK36;CYP27A1	CYP27A1	PNKD	na	PNKD;TMBIM1	CXCR2;CYP27A1;GPBAR1;TTLL4	CYP27A1	na	na	na	na	PNKD;TMBIM1	AAMP;CYP27A1;GPBAR1	AC021016.2;ARPC2;BCS1L;CXCR1;CXCR2;PLCD4;RQCD1;STK36;TTLL4;USP37;VIL1;ZNF142
rs78058190	HDL	2	219699999	G	A	0.944802	0.0804	0.0035	116.046	100.682	0.6106	CYP27A1	WNT6	na	PNKD;USP37;RQCD1;ZNF142;BCS1L;WNT6	PNKD;RQCD1;BCS1L;WNT6	DNAJB2	PRKAG3	na	na	ABCB6;CYP27A1;STK16;TTLL4	na	na	na	na	na	na	WNT6	BCS1L;DNAJB2;PNKD;PRKAG3;RQCD1;USP37;ZNF142
rs78058190	LDL	2	219699999	G	A	0.94517	-0.0241	0.0036	10.6646	8.01385	0.4348	CYP27A1	WNT6	na	PNKD;USP37;RQCD1;ZNF142;BCS1L;WNT6	PNKD;RQCD1;BCS1L;WNT6	CYP27A1	PRKAG3	FEV	na	ABCB6;CYP27A1;STK16;TTLL4	na	na	na	na	na	na	WNT6	BCS1L;CYP27A1;FEV;PNKD;PRKAG3;RQCD1;USP37;ZNF142
rs78058190	logTG	2	219699999	G	A	0.945072	-0.0762	0.0035	104.364	94.316	0.1008	CYP27A1	WNT6	na	PNKD;CTDSP1;VIL1;USP37;RQCD1;PLCD4;ZNF142;BCS1L;RNF25;STK36;TTLL4;CYP27A1;RP11-459I19.1;PRKAG3;WNT6;STK16	PNKD;VIL1;USP37;RQCD1;PLCD4;ZNF142;BCS1L;STK36;TTLL4;CYP27A1;RP11-459I19.1;PRKAG3;WNT6	CYP27A1	PRKAG3	na	na	ABCB6;CYP27A1;STK16;TTLL4	CYP27A1	na	na	na	na	na	CYP27A1;PRKAG3;WNT6	BCS1L;CTDSP1;PLCD4;PNKD;RNF25;RP11-459I19.1;RQCD1;STK16;STK36;TTLL4;USP37;VIL1;ZNF142
rs78058190	nonHDL	2	219699999	G	A	0.94013	-0.0444	0.004	27.9016	24.4314	0.2761	CYP27A1	WNT6	na	PNKD;CTDSP1;VIL1;USP37;RQCD1;PLCD4;ZNF142;BCS1L;STK36;TTLL4;CYP27A1;RP11-459I19.1;WNT6	PNKD;VIL1;USP37;RQCD1;PLCD4;BCS1L;STK36;TTLL4;CYP27A1;RP11-459I19.1;WNT6	CYP27A1	PRKAG3	na	na	ABCB6;CYP27A1;STK16;TTLL4	CYP27A1	na	na	na	na	na	CYP27A1;WNT6	BCS1L;CTDSP1;PLCD4;PNKD;PRKAG3;RP11-459I19.1;RQCD1;STK36;TTLL4;USP37;VIL1;ZNF142
rs2203452	logTG	2	227094758	G	A	0.66008	0.0331	0.0013	142.279	128.539	0.06684	na	AC010735.2;AC010735.1;IRS1	AC010735.2;AC010735.1;IRS1	AC068138.1	na	na	na	na	na	na	na	na	na	na	na	na	na	AC010735.1;AC010735.2;AC068138.1;IRS1
rs2972145	HDL	2	227101309	C	T	0.668999	-0.0367	0.0013	174.611	151.052	0.7316	na	AC010735.2;AC010735.1;IRS1	AC010735.2;AC010735.1;IRS1	na	na	IRS1	IRS1	na	na	IRS1	IRS1	na	na	na	na	IRS1	na	AC010735.1;AC010735.2
rs2138157	nonHDL	2	227103717	C	A	0.67226	0.0125	0.0016	14.2513	11.181	0.2453	na	AC010735.2;IRS1;AC010735.1	AC010735.2;IRS1;AC010735.1	na	na	IRS1	IRS1	na	na	IRS1	IRS1	na	na	na	na	IRS1	na	AC010735.1;AC010735.2
rs79639690	logTG	2	227605895	C	T	0.0631223	0.018	0.0026	11.3546	11.9125	0.0001532	na	AC010735.1;AC010735.2;MFF	AC010735.1;AC010735.2	IRS1;RP11-395N3.2	IRS1;RP11-395N3.2	IRS1	IRS1	IRS1	na	IRS1	IRS1	IRS1	na	na	IRS1	na	na	AC010735.1;AC010735.2;MFF;RP11-395N3.2
rs116001967	nonHDL	2	228451050	G	A	0.986642	0.0507	0.0073	11.4226	8.2843	0.7784	na	na	na	na	na	na	C2orf83	C2orf83	na	CCL20	na	C2orf83	na	na	na	na	C2orf83	na
rs11694828	HDL	2	228565656	G	A	0.581822	-0.014	0.0014	22.817	18.4204	0.6971	na	SLC19A3	na	na	na	na	SLC19A3	SLC19A3	na	CCL20	na	SLC19A3	na	na	na	SLC19A3	na	na
rs985891	HDL	2	230019348	G	A	0.676298	0.0099	0.0013	13.5802	8.96639	0.5006	na	na	na	na	na	na	PID1	PID1	na	na	na	PID1	na	na	na	na	PID1	na
rs62192912	TC	2	234144942	C	T	0.746653	-0.0109	0.0016	11.0181	8.36057	0.2938	na	UGT1A1	UGT1A1	UGT1A8;UGT1A10;UGT1A7;UGT1A6;UGT1A4;UGT1A3	UGT1A10;UGT1A7;UGT1A6;UGT1A4;UGT1A3	DGKD	ATG16L1	na	na	SAG	na	na	na	na	na	na	na	ATG16L1;DGKD;UGT1A1;UGT1A10;UGT1A3;UGT1A4;UGT1A6;UGT1A7;UGT1A8
rs17868301	logTG	2	234512095	C	T	0.942901	-0.0168	0.0028	8.70483	7.3955	0.01199	na	na	na	UGT1A8;UGT1A10;UGT1A6;UGT1A8	UGT1A10;UGT1A8	DGKD	UGT1A8	USP40	AC114812.8;UGT1A10;UGT1A9;UGT1A8;UGT1A7;UGT1A6	SAG	na	na	na	na	UGT1A8	na	UGT1A10;UGT1A6	AC114812.8;DGKD;UGT1A7;UGT1A9;USP40
rs35203651	LDL	2	234679549	C	T	0.104651	0.0241	0.0021	29.76	25.3533	0.8538	na	UGT1A8	na	UGT1A8;UGT1A10;UGT1A7;UGT1A6;UGT1A4;UGT1A8;MROH2A	UGT1A10;UGT1A7;UGT1A6;UGT1A4;UGT1A8;MROH2A	DGKD	UGT1A8	na	na	SAG	na	na	na	na	UGT1A8	na	na	DGKD;MROH2A;UGT1A10;UGT1A4;UGT1A6;UGT1A7
rs35203651	nonHDL	2	234679549	C	T	0.106496	0.0285	0.0024	31.7969	27.0876	0.4998	na	UGT1A8	na	UGT1A8;UGT1A10;UGT1A7;UGT1A6;UGT1A4;UGT1A3;UGT1A8;MROH2A	UGT1A10;UGT1A7;UGT1A6;UGT1A4;UGT1A3;UGT1A8;MROH2A	DGKD	UGT1A8	na	na	SAG	na	na	na	na	UGT1A8	na	na	DGKD;MROH2A;UGT1A10;UGT1A3;UGT1A4;UGT1A6;UGT1A7
rs35203651	TC	2	234679549	C	T	0.10499	0.0271	0.002	41.1011	36.3675	0.2818	na	UGT1A8	na	UGT1A8;UGT1A10;UGT1A7;UGT1A6;UGT1A4;UGT1A3;UGT1A8;MROH2A	UGT1A10;UGT1A7;UGT1A6;UGT1A4;UGT1A3;UGT1A8;MROH2A	DGKD	UGT1A8	na	na	SAG	na	na	na	na	UGT1A8	na	na	DGKD;MROH2A;UGT1A10;UGT1A3;UGT1A4;UGT1A6;UGT1A7
rs4675812	HDL	2	242395674	G	A	0.408684	-0.0138	0.0013	25.5973	21.7244	0.1161	na	AC005104.1;FARP2;ANO7	na	na	na	HDLBP	FARP2	na	D2HGDH	ATG4B;NEU4	na	na	na	na	na	na	FARP2	AC005104.1;ANO7;D2HGDH;HDLBP
rs7639927	logTG	3	4762734	T	A	0.495175	0.0113	0.0013	17.4496	14.3711	0.9391	na	na	na	na	na	EDEM1	ITPR1	na	na	BHLHE40	na	na	na	na	na	na	na	EDEM1;ITPR1
rs62246311	logTG	3	9498143	G	A	0.908114	-0.015	0.0022	11.0353	9.45933	0.1537	na	na	na	SRGAP3;THUMPD3;SETD5	SRGAP3	SETD5	SETD5	SETD5	SETD5;JAGN1	CIDEC	SETD5	SETD5	na	SETD5	na	na	na	JAGN1;SRGAP3;THUMPD3
rs138426171	nonHDL	3	11886116	C	T	0.995468	0.0753	0.0126	8.64127	7.74882	0.2882	na	na	na	SYN2;TIMP4;PPARG	TIMP4;PPARG	PPARG	TAMM41	na	na	PPARG	PPARG	na	na	na	na	na	PPARG	SYN2;TAMM41;TIMP4
rs1584063	TC	3	12266855	G	A	0.54806	0.0223	0.0012	76.3581	66.2004	0.01887	na	na	na	SYN2;TIMP4;PPARG;TSEN2;MKRN2OS;MKRN2;RAF1	TIMP4;PPARG;TSEN2;MKRN2OS;MKRN2;RAF1	PPARG	PPARG	na	na	PPARG	PPARG	na	na	na	na	PPARG	na	MKRN2;MKRN2OS;RAF1;SYN2;TIMP4;TSEN2
rs13076933	LDL	3	12327431	G	T	0.225964	-0.0246	0.0015	59.7184	49.4294	0.5618	na	CAND2	CAND2	SYN2;TIMP4;PPARG;TSEN2;MKRN2OS;MKRN2;RAF1	TIMP4;PPARG;TSEN2;MKRN2OS;MKRN2;RAF1	PPARG	PPARG	PPARG	na	PPARG	PPARG	PPARG	na	na	PPARG	na	na	CAND2;MKRN2;MKRN2OS;RAF1;SYN2;TIMP4;TSEN2
rs12633551	HDL	3	12360494	C	T	0.956224	0.047	0.0031	51.1952	43.3152	0.1172	na	na	na	SYN2;TIMP4;PPARG;TSEN2;MKRN2OS;MKRN2;RAF1;CAND2	TIMP4;PPARG;TSEN2;MKRN2OS;MKRN2;RAF1	PPARG	PPARG	PPARG;TIMP4	PPARG	CAND2;PPARG	PPARG	PPARG;TIMP4	na	PPARG	na	na	TIMP4	CAND2;MKRN2;MKRN2OS;RAF1;SYN2;TSEN2
rs7638903	logTG	3	12383714	G	A	0.875534	0.0254	0.0019	40.0339	35.1694	0.5245	na	PPARG	na	SYN2;TIMP4;PPARG;TSEN2;MKRN2;RAF1	TIMP4;PPARG;TSEN2;RAF1	PPARG	PPARG	PPARG	PPARG	CAND2;PPARG	PPARG	PPARG	PPARG	na	na	na	na	MKRN2;RAF1;SYN2;TIMP4;TSEN2
rs1151996	nonHDL	3	12445807	C	A	0.362232	-0.0193	0.0015	37.1591	35.5957	3e-06	na	na	na	SYN2;TIMP4;PPARG;TSEN2;MKRN2OS;MKRN2;RAF1;TMEM40;CAND2	TIMP4;PPARG;TSEN2;MKRN2OS;MKRN2;RAF1	PPARG	PPARG	PPARG	na	CAND2;PPARG	PPARG	PPARG	na	na	PPARG	na	na	CAND2;MKRN2;MKRN2OS;RAF1;SYN2;TIMP4;TMEM40;TSEN2
rs113223234	TC	3	12793024	G	A	0.910266	0.0204	0.0022	19.7413	16.2312	0.5983	na	CAND2	CAND2	PPARG;TSEN2;MKRN2OS;MKRN2;RAF1;TMEM40;CAND2	PPARG;TSEN2;MKRN2OS;MKRN2;RAF1	PPARG	TMEM40	TMEM40	na	CAND2;PPARG	PPARG	TMEM40	na	na	na	TMEM40	CAND2;PPARG	MKRN2;MKRN2OS;RAF1;TSEN2
rs2305398	LDL	3	12856856	G	A	0.60313	-0.0085	0.0013	10.2065	7.34894	0.2392	na	na	na	PPARG;TSEN2;MKRN2OS;MKRN2;RAF1;CAND2	PPARG;TSEN2;MKRN2OS;MKRN2;RAF1	PPARG	CAND2	TMEM40	CAND2	CAND2;PPARG	PPARG	na	na	na	na	CAND2	PPARG	MKRN2;MKRN2OS;RAF1;TMEM40;TSEN2
rs11128749	logTG	3	15667215	C	A	0.59506	-0.0078	0.0013	8.70483	7.51916	0.02518	na	na	na	BTD;ANKRD28	ANKRD28	ANKRD28	BTD	BTD;COLQ;HACL1	ANKRD28	na	ANKRD28	BTD	na	na	na	ANKRD28;BTD	na	COLQ;HACL1
rs2455850	HDL	3	15782711	C	A	0.683427	0.0116	0.0014	15.9303	14.7557	0.006596	na	na	na	na	na	ANKRD28	ANKRD28	BTD;ANKRD28	na	na	ANKRD28	ANKRD28	na	na	na	ANKRD28	na	BTD
rs11717397	logTG	3	23368583	G	A	0.555322	-0.0089	0.0013	11.12	7.84339	0.9571	na	na	na	na	na	UBE2E2	UBE2E2	na	na	na	UBE2E2	na	na	na	na	na	UBE2E2	na
rs113967141	HDL	3	24302811	G	A	0.884825	0.0177	0.0019	19.917	14.3821	0.2811	na	na	na	THRB	na	UBE2E1	THRB	THRB	na	THRB	na	THRB	na	na	na	THRB	na	UBE2E1
rs6792725	LDL	3	24520283	G	A	0.682872	-0.0145	0.0014	24.4107	18.4858	0.5139	na	na	na	THRB	na	na	THRB	na	na	THRB	na	na	na	na	na	na	THRB	na
rs6792725	logTG	3	24520283	G	A	0.682191	-0.0159	0.0014	29.1653	22.812	0.2796	na	na	na	THRB	na	na	THRB	THRB	na	THRB	na	THRB	na	na	na	THRB	na	na
rs6792725	nonHDL	3	24520283	G	A	0.674565	-0.0187	0.0017	27.4178	24.1587	0.09214	na	na	na	THRB	na	na	THRB	THRB	na	THRB	na	THRB	na	na	na	THRB	na	na
rs6792725	TC	3	24520283	G	A	0.68319	-0.0171	0.0014	33.5837	27.9357	0.3715	na	na	na	THRB	na	THRB	THRB	na	na	THRB	THRB	na	na	na	na	THRB	na	na
rs9837622	nonHDL	3	32514647	T	A	0.925916	0.034	0.0028	33.2034	30.989	0.00067	na	na	na	CMTM6;DYNC1LI1	CMTM6	na	CMTM7	CMTM7;CMTM6	na	na	na	CMTM6;CMTM7	na	na	na	na	CMTM6;CMTM7	DYNC1LI1
rs7640978	LDL	3	32533010	C	T	0.904967	0.0309	0.0021	48.2824	42.6822	0.01536	na	na	na	CMTM6;DYNC1LI1	CMTM6	CMTM8	CMTM6	CMTM6;CMTM7	na	na	na	CMTM6	na	na	na	CMTM6	na	CMTM7;CMTM8;DYNC1LI1
rs7640978	TC	3	32533010	C	T	0.905099	0.0294	0.0021	43.8072	39.5996	0.0555	na	na	na	CMTM6;DYNC1LI1	CMTM6	CMTM8	CMTM6	CMTM6;CMTM7	na	na	na	CMTM6	na	na	na	CMTM6	na	CMTM7;CMTM8;DYNC1LI1
rs7622114	HDL	3	36960660	C	A	0.423204	-0.0126	0.0013	21.488	17.3326	0.4727	na	LINC02033;TRANK1;AC105749.1	AC105749.1	na	na	GOLGA4	TRANK1	na	na	na	na	na	na	na	na	na	TRANK1	AC105749.1;GOLGA4;LINC02033
rs9831084	logTG	3	37025661	C	T	0.422024	-0.0105	0.0013	15.1777	12.3615	0.08732	na	na	na	TRANK1;RP11-129K12.1;EPM2AIP1;MLH1;LRRFIP2;RP11-259K5.1;GOLGA4;C3orf35	RP11-129K12.1;EPM2AIP1;LRRFIP2	GOLGA4	EPM2AIP1	GOLGA4	na	na	GOLGA4	GOLGA4	na	na	na	GOLGA4	EPM2AIP1	C3orf35;LRRFIP2;MLH1;RP11-129K12.1;RP11-259K5.1;TRANK1
rs2305637	HDL	3	47045846	C	T	0.833985	0.0205	0.0017	32.7588	25.1283	0.7951	na	NBEAL2	NBEAL2	na	na	SCAP	NBEAL2	SCAP;PTPN23;SETD2;NBEAL2	NBEAL2	MYL3;PTPN23	na	NBEAL2	na	na	NBEAL2	na	SCAP	PTPN23;SETD2
rs140444852	TC	3	47955346	GT	G	0.983217	0.0426	0.0056	13.5525	12.3002	0.05258	na	UCN2	na	CDC25A	na	SCAP	MAP4	SCAP;PFKFB4;CAMP;PTPN23;SMARCC1;SLC26A6;IP6K2;FBXW12;SHISA5	na	na	na	na	na	na	na	na	SCAP	CAMP;CDC25A;FBXW12;IP6K2;MAP4;PFKFB4;PTPN23;SHISA5;SLC26A6;SMARCC1;UCN2
rs4955411	logTG	3	49145304	G	A	0.779035	0.0141	0.0015	20.2631	15.0528	0.2699	na	SHISA5;DALRD3;KLHDC8B;P4HTM;NICN1;AC137630.3;QRICH1	KLHDC8B;QRICH1	NCKIPSD;PRKAR2A;P4HTM;WDR6;DALRD3;NDUFAF3;QRICH1;QARS;CCDC71;KLHDC8B;CCDC36;C3orf62;USP4;GPX1;RHOA;TCTA;AMT;NICN1;DAG1;BSN-AS2;BSN	NCKIPSD;PRKAR2A;P4HTM;DALRD3;NDUFAF3;QRICH1;QARS;CCDC71;KLHDC8B;USP4;GPX1;RHOA;TCTA;AMT;NICN1;DAG1;BSN-AS2	WDR6	USP19	KLHDC8B;DAG1;PRKAR2A;LAMB2;SLC25A20;QRICH1;USP19;WDR6;ARIH2;IP6K2;IMPDH2;USP4	na	ARIH2;GPX1;LAMB2;USP19	WDR6	KLHDC8B;DAG1;PRKAR2A;QRICH1;WDR6;USP4;USP19	na	na	na	KLHDC8B;QRICH1;WDR6	DAG1;DALRD3;NICN1;P4HTM;PRKAR2A;USP19;USP4	AC137630.3;AMT;ARIH2;BSN;BSN-AS2;C3orf62;CCDC36;CCDC71;GPX1;IMPDH2;IP6K2;LAMB2;NCKIPSD;NDUFAF3;QARS;RHOA;SHISA5;SLC25A20;TCTA
rs11925192	HDL	3	50038664	G	A	0.52918	0.0216	0.0013	61.2682	53.2607	0.7619	na	TRAIP;SEMA3F;RBM6;MST1R;CAMKV;AC105935.1;CDHR4	SEMA3F	na	na	GNAI2	RBM6	RBM5;RBM6;RNF123	na	na	na	RBM6	na	na	na	RBM6	na	AC105935.1;CAMKV;CDHR4;GNAI2;MST1R;RBM5;RNF123;SEMA3F;TRAIP
rs6446202	TC	3	50219991	G	C	0.127166	-0.0134	0.0018	13.0116	10.9307	0.01557	na	na	na	MON1A;RBM6;RBM5;SEMA3F;GNAT1;GNAI2;U73166.2;SEMA3B;LSMEM2;IFRD2;HYAL1;RASSF1;ZMYND10;NPRL2;CYB561D2;TMEM115;CACNA2D2;C3orf18	MON1A;RBM6;RBM5;SEMA3F;GNAT1;GNAI2;U73166.2;SEMA3B;LSMEM2;RASSF1;NPRL2;CYB561D2;TMEM115	GNAI2	SEMA3F	GNAI2;SLC38A3;IFRD2;C3orf45	IFRD2	na	GNAI2	GNAI2;IFRD2	na	na	na	GNAI2;IFRD2	SEMA3F	C3orf18;C3orf45;CACNA2D2;CYB561D2;GNAT1;HYAL1;LSMEM2;MON1A;NPRL2;RASSF1;RBM5;RBM6;SEMA3B;SLC38A3;TMEM115;U73166.2;ZMYND10
rs2073499	nonHDL	3	50374293	G	A	0.199924	-0.014	0.002	11.5918	8.04869	0.7481	na	CYB561D2;RASSF1-AS1;TMEM115;CACNA2D2;SEMA3B-AS1;HYAL1;LSMEM2;RASSF1;SEMA3B;GNAI2	CYB561D2;CACNA2D2;RASSF1-AS1;GNAI2	SEMA3F;GNAI2;U73166.2;SEMA3B;LSMEM2;IFRD2;HYAL1;RASSF1;ZMYND10;NPRL2;CYB561D2;TMEM115;CACNA2D2	GNAI2;U73166.2;SEMA3B;LSMEM2;RASSF1;NPRL2;CYB561D2;TMEM115	GNAI2	RASSF1	SLC38A3;GNAI2;HYAL2;IFRD2;NAT6;TMEM115	RASSF1;TUSC2	na	GNAI2	GNAI2;IFRD2;TMEM115	na	na	GNAI2;RASSF1	TMEM115	CACNA2D2;CYB561D2;HYAL1;IFRD2;LSMEM2;SEMA3B	HYAL2;NAT6;NPRL2;RASSF1-AS1;SEMA3B-AS1;SEMA3F;SLC38A3;TUSC2;U73166.2;ZMYND10
rs56208706	TC	3	52063885	C	T	0.982963	0.0294	0.0051	8.08724	8.06456	0.001263	na	SPCS1;PBRM1;GNL3;NT5DC2;NEK4;SMIM4;AC006252.1;AC006254.2;SFMBT1;GLT8D1;ITIH1;ITIH4;AC104446.1;AC099667.1;MUSTN1;POC1A	NEK4;SPCS1;NT5DC2;AC099667.1;GNL3	PPM1M;WDR82;GLYCTK;NT5DC2	GLYCTK;NT5DC2	GLYCTK	DUSP7	na	STAB1	DUSP7;NISCH	GLYCTK	na	na	na	na	na	GLYCTK;NT5DC2	AC006252.1;AC006254.2;AC099667.1;AC104446.1;DUSP7;GLT8D1;GNL3;ITIH1;ITIH4;MUSTN1;NEK4;PBRM1;POC1A;PPM1M;SFMBT1;SMIM4;SPCS1;STAB1;WDR82
rs138789058	HDL	3	52124388	C	T	0.98345	0.0404	0.0052	14.1026	10.5838	0.6705	na	SFMBT1;STIMATE;BAP1;WDR82;RFT1	na	PPM1M;WDR82;GLYCTK;NT5DC2;SMIM4;PBRM1	NT5DC2	NISCH	POC1A	ALAS1;TWF2;GLYCTK;WDR82	STAB1	DUSP7;NISCH	na	GLYCTK;WDR82	na	na	na	WDR82	GLYCTK	ALAS1;BAP1;NISCH;NT5DC2;PBRM1;POC1A;PPM1M;RFT1;SFMBT1;SMIM4;STAB1;STIMATE;TWF2
rs17052061	logTG	3	52346240	G	T	0.169544	-0.0183	0.0017	26.2965	23.5914	0.04854	na	WDR82;NISCH;TWF2;DNAH1;AC092045.1;TLR9;PPM1M;GLYCTK;SEMA3G	GLYCTK	ALAS1;TLR9;TWF2;PPM1M;WDR82;GLYCTK;DNAH1;BAP1;PHF7;SEMA3G;TNNC1;NISCH;STAB1;NT5DC2;SMIM4;GNL3;ITIH1	TLR9;TWF2;PPM1M;WDR82;GLYCTK;DNAH1;NISCH;STAB1;SMIM4;GNL3	GLYCTK	DNAH1	GLYCTK;WDR82;SEMA3G;TWF2;GLYCTK-AS1;TNNC1;NISCH	SEMA3G	DUSP7;NISCH	GLYCTK	GLYCTK;WDR82;SEMA3G;TWF2;TNNC1;NISCH	na	na	GLYCTK;SEMA3G	DNAH1;NISCH;TWF2;WDR82	PPM1M;TLR9;TNNC1	AC092045.1;ALAS1;BAP1;GLYCTK-AS1;GNL3;ITIH1;NT5DC2;PHF7;SMIM4;STAB1
rs13621	LDL	3	52558133	C	T	0.448358	0.0108	0.0013	16.0106	14.4356	0.08008	na	NT5DC2;NEK4;AC006252.1;SMIM4	NT5DC2	PPM1M;WDR82;GLYCTK;NT5DC2;SMIM4;PBRM1;GNL3;GLT8D1;SPCS1;NEK4;ITIH1;ITIH3	NT5DC2;GNL3;GLT8D1;SPCS1;NEK4;ITIH1;ITIH3	GLYCTK	STAB1	ITIH1;GLYCTK;ALAS1;ITIH3;TWF2;STAB1;PBRM1;DNAH1	GNL3	DUSP7;NISCH	GLYCTK	ITIH1;GLYCTK;ITIH3;PBRM1;STAB1	na	na	na	GLYCTK	GNL3;ITIH1;ITIH3;NEK4;NT5DC2;PBRM1;SMIM4;STAB1	AC006252.1;ALAS1;DNAH1;GLT8D1;PPM1M;SPCS1;TWF2;WDR82
rs7638808	TC	3	52572056	G	A	0.480438	0.0095	0.0012	14.6127	11.8254	0.06371	na	NT5DC2;NEK4;GNL3	NT5DC2	PPM1M;WDR82;GLYCTK;NT5DC2;SMIM4;PBRM1;GNL3;GLT8D1;SPCS1;NEK4;ITIH1;ITIH3;SFMBT1	GLYCTK;NT5DC2;PBRM1;GNL3;GLT8D1;SPCS1;NEK4;ITIH1	GLYCTK	SMIM4	ITIH1;ITIH3;STAB1;PBRM1;GLYCTK;WDR82;BAP1;GNL3	SPCS1;NEK4;GLT8D1;SNORD19;SNORD69;SNORD19B;GNL3;STAB1	DUSP7;NISCH	GLYCTK	ITIH1;ITIH3;PBRM1;GLYCTK;WDR82;GNL3	na	na	GNL3	GLYCTK;NEK4	GLT8D1;ITIH1;ITIH3;NT5DC2;PBRM1;SMIM4;SPCS1;STAB1;WDR82	BAP1;PPM1M;SFMBT1;SNORD19;SNORD19B;SNORD69
rs2251219	nonHDL	3	52584787	C	T	0.392704	0.0097	0.0015	9.99918	8.51251	0.0133	na	na	na	PPM1M;WDR82;DNAH1;STAB1;NT5DC2;SMIM4;PBRM1;GNL3;GLT8D1;SPCS1;NEK4;ITIH1;ITIH4;MUSTN1;SFMBT1	PPM1M;DNAH1;STAB1;GNL3;GLT8D1;SPCS1;NEK4;ITIH1	GLYCTK	SMIM4	ITIH1;ITIH4;GLYCTK;ALAS1;ITIH3;STAB1;TWF2;WDR82;PBRM1;BAP1;GNL3;NISCH	SNORD19;PBRM1;SNORD19B;GNL3;SNORD69;GLT8D1;SPCS1;NEK4;ITIH1;ITIH3	DUSP7;NISCH	na	ITIH1;ITIH4;STAB1;WDR82;PBRM1;GNL3;ITIH3	na	na	na	GNL3;ITIH1;PBRM1	GLT8D1;GLYCTK;ITIH3;ITIH4;NEK4;SMIM4;SPCS1;STAB1;WDR82	ALAS1;BAP1;DNAH1;MUSTN1;NISCH;NT5DC2;PPM1M;SFMBT1;SNORD19;SNORD19B;SNORD69;TWF2
rs9968117	HDL	3	52838654	C	T	0.874959	-0.0232	0.0019	33.5637	29.8879	0.008532	na	STAB1;WDR82;AC096887.2	na	NT5DC2;SMIM4;PBRM1;GNL3;GLT8D1;SPCS1;NEK4;ITIH1;ITIH3	NT5DC2;GNL3;GLT8D1;SPCS1;NEK4;ITIH1;ITIH3	PRKCD	ITIH3	ITIH1;ITIH4;STAB1;PBRM1;ITIH3	STAB1	NISCH;PRKCD	na	ITIH1;PBRM1;ITIH3;STAB1	na	na	na	ITIH3;STAB1	ITIH1;PBRM1	AC096887.2;GLT8D1;GNL3;ITIH4;NEK4;NT5DC2;PRKCD;SMIM4;SPCS1;WDR82
rs28879486	logTG	3	57533658	C	T	0.814084	0.0114	0.0017	10.6986	7.90851	0.3442	na	ARF4;PDHB;DENND6A-AS1	ARF4	DNAH12;PDE12;ARF4;DENND6A	PDE12;ARF4	na	DNAH12	na	RNU6ATAC26P;DNAH12	na	na	na	na	na	na	DNAH12	ARF4	DENND6A;DENND6A-AS1;PDE12;PDHB;RNU6ATAC26P
rs4597680	HDL	3	57596105	C	T	0.770632	-0.0108	0.0016	10.8302	9.13744	0.04995	na	ARF4;DENND6A-AS1;DNAH12;PDHB	ARF4	na	na	FLNB	ARF4	FAM116A;ARF4	DNAH12;RNU6ATAC26P;ARF4	na	na	ARF4	na	na	ARF4	na	DNAH12	DENND6A-AS1;FAM116A;FLNB;PDHB;RNU6ATAC26P
rs9844432	LDL	3	58391293	G	C	0.0778588	-0.037	0.0024	52.898	47.1602	0.4684	na	na	na	DNASE1L3;ABHD6;RPP14;PXK;PDHB;RP11-359I18.5;KCTD6;ACOX2;FAM3D	ABHD6;RPP14;PXK;PDHB;ACOX2	FLNB	PXK	ABHD6;PXK;PDHB	na	na	na	ABHD6;PXK;PDHB	na	na	na	PXK	ABHD6;PDHB	ACOX2;DNASE1L3;FAM3D;FLNB;KCTD6;RP11-359I18.5;RPP14
rs9844432	nonHDL	3	58391293	G	C	0.0781365	-0.0374	0.0028	39.9681	33.2169	0.6007	na	na	na	DNASE1L3;ABHD6;RPP14;PXK;PDHB;RP11-359I18.5;KCTD6	ABHD6;PXK;PDHB;KCTD6	ACOX2	PXK	ABHD6;PXK	na	na	na	ABHD6;PXK	na	na	na	PXK	ABHD6	ACOX2;DNASE1L3;KCTD6;PDHB;RP11-359I18.5;RPP14
rs9844432	TC	3	58391293	G	C	0.0776786	-0.0364	0.0023	55.6869	47.984	0.6726	na	PDHB	na	DNASE1L3;ABHD6;RPP14;RP11-80H18.4;PXK;PDHB;RP11-359I18.5;KCTD6;ACOX2	DNASE1L3;ABHD6;RPP14;PXK;PDHB;RP11-359I18.5;KCTD6;ACOX2	FLNB	PXK	PXK;ABHD6	na	na	na	PXK;ABHD6	na	na	na	PXK	ABHD6;PDHB	ACOX2;DNASE1L3;FLNB;KCTD6;RP11-359I18.5;RP11-80H18.4;RPP14
rs76824303	HDL	3	62459819	C	A	0.0911511	0.0145	0.0023	9.53849	7.55533	0.07969	na	na	na	na	na	na	CADPS	na	na	na	na	na	na	na	na	na	na	CADPS
rs10049466	logTG	3	66868609	C	T	0.681636	-0.01	0.0014	12.039	11.4129	0.002752	na	LRIG1;MAGI1	na	LRIG1	na	na	KBTBD8	na	na	na	na	na	na	na	na	na	LRIG1	KBTBD8;MAGI1
rs12486424	HDL	3	66874481	C	A	0.338571	-0.0084	0.0013	9.98446	7.98675	0.007948	na	LRIG1	na	na	na	na	KBTBD8	na	na	na	na	na	na	na	na	na	na	KBTBD8;LRIG1
rs2114660	HDL	3	69803691	T	A	0.773001	-0.0103	0.0015	11.1823	8.73618	0.01702	na	MITF	na	MITF	na	MITF	MITF	MITF	na	na	MITF	MITF	na	MITF	na	na	na	na
rs9834743	LDL	3	69837571	G	C	0.605894	0.0122	0.0013	20.1997	14.8909	0.8365	na	na	na	MITF	na	na	MITF	MITF	na	na	na	MITF	na	na	na	MITF	na	na
rs9834743	nonHDL	3	69837571	G	C	0.61465	0.0166	0.0015	27.7398	21.0776	0.2492	na	na	na	MITF	na	MITF	MITF	MITF	na	na	MITF	MITF	na	na	MITF	na	na	na
rs9834743	TC	3	69837571	G	C	0.606231	0.0136	0.0013	24.887	20.3198	0.4954	na	na	na	MITF	MITF	MITF	MITF	MITF	na	na	MITF	MITF	na	na	MITF	na	na	na
rs1529585	logTG	3	69870595	G	A	0.374764	0.009	0.0013	11.3546	8.63278	0.5683	na	na	na	MITF	na	na	MITF	MITF	na	na	na	MITF	na	na	na	MITF	na	na
rs4974290	HDL	3	70508703	G	C	0.459446	0.009	0.0013	11.3546	9.07524	0.06782	na	na	na	MITF	na	FOXP1	MITF	na	na	na	na	na	na	na	na	na	MITF	FOXP1
rs62247166	HDL	3	71532738	C	T	0.570567	-0.0088	0.0013	10.8878	8.19242	0.5037	na	na	na	na	na	FOXP1	FOXP1	FOXP1	na	na	FOXP1	FOXP1	na	na	na	FOXP1	na	na
rs13066793	HDL	3	87037543	G	A	0.0886419	0.0172	0.0024	12.1144	8.91975	0.7329	na	VGLL3	na	na	na	na	VGLL3	na	na	na	na	na	na	na	na	na	VGLL3	na
rs13066793	logTG	3	87037543	G	A	0.0883602	-0.0169	0.0023	12.6958	8.33241	0.7705	na	VGLL3	na	VGLL3	na	na	VGLL3	na	na	na	na	na	na	na	na	VGLL3	na	na
rs3796276	LDL	3	100465609	G	A	0.648422	-0.0086	0.0014	9.09125	7.45142	0.312	na	TFG	TFG	TFG	TFG	na	TFG	GPR128;TFG;TMEM45A	GPR128;IMPG2	na	na	TFG;GPR128	na	na	TFG	na	GPR128	IMPG2;TMEM45A
rs7643617	HDL	3	114753078	C	A	0.147461	-0.0177	0.0019	19.917	14.9678	0.8061	na	na	na	na	na	ZBTB20	ZBTB20	ZBTB20	ZBTB20	na	ZBTB20	ZBTB20	na	na	ZBTB20	na	na	na
rs3732356	HDL	3	119529113	G	T	0.082352	0.0273	0.0023	31.7687	26.1641	0.02542	na	na	na	NR1I2;GSK3B	GSK3B	GSK3B	NR1I2	NR1I2	na	na	GSK3B	NR1I2	na	na	na	NR1I2	GSK3B	na
rs3732356	TC	3	119529113	G	T	0.081483	0.0303	0.0022	42.4296	35.4522	0.05054	na	na	na	NR1I2;GSK3B;GPR156	GSK3B	GSK3B	NR1I2	NR1I2	NR1I2	na	GSK3B	NR1I2	na	na	NR1I2	na	GSK3B	GPR156
rs3732359	LDL	3	119536429	G	A	0.280579	0.0131	0.0014	20.0866	16.238	0.03381	na	GSK3B;NR1I2	na	NR1I2;GSK3B	GSK3B	GSK3B	NR1I2	NR1I2	na	na	GSK3B	NR1I2	na	na	NR1I2	GSK3B	na	na
rs3732359	nonHDL	3	119536429	G	A	0.271199	0.0133	0.0017	14.2894	12.123	0.02297	na	NR1I2	na	NR1I2;GSK3B	GSK3B	GSK3B	NR1I2	NR1I2;GSK3B	na	na	GSK3B	NR1I2;GSK3B	na	na	NR1I2	GSK3B	na	na
rs68028452	LDL	3	122285218	C	CT	0.303489	0.0189	0.0015	35.6754	30.3911	0.9542	na	na	na	CSTA;CCDC58;FAM162A;WDR5B;KPNA1;PARP9;DTX3L;DIRC2;SEMA5B	CCDC58;FAM162A;KPNA1;PARP9	na	DTX3L	na	na	KPNA1	na	na	na	na	na	na	DTX3L	CCDC58;CSTA;DIRC2;FAM162A;KPNA1;PARP9;SEMA5B;WDR5B
rs68028452	nonHDL	3	122285218	C	CT	0.311184	0.0173	0.0017	23.5976	19.32	0.281	na	na	na	CCDC58;FAM162A;WDR5B;KPNA1;PARP9;DTX3L;DIRC2;SEMA5B	CCDC58;FAM162A;KPNA1;PARP9;SEMA5B	na	DTX3L	na	PARP9	KPNA1	na	na	na	na	na	na	DTX3L;PARP9	CCDC58;DIRC2;FAM162A;KPNA1;SEMA5B;WDR5B
rs68028452	TC	3	122285218	C	CT	0.306509	0.0165	0.0014	31.3349	25.1955	0.6828	na	na	na	CSTA;CCDC58;FAM162A;WDR5B;KPNA1;PARP9;DTX3L;HSPBAP1;DIRC2;RP11-67L2.2;SEMA5B	CCDC58;FAM162A;KPNA1;PARP9;HSPBAP1;RP11-67L2.2;SEMA5B	CD86	DTX3L	na	SEMA5B	KPNA1	na	na	na	na	na	na	DTX3L;SEMA5B	CCDC58;CD86;CSTA;DIRC2;FAM162A;HSPBAP1;KPNA1;PARP9;RP11-67L2.2;WDR5B
rs11708067	HDL	3	123065778	G	A	0.215267	-0.0127	0.0015	16.5977	11.0893	0.9156	na	na	na	DIRC2;SEMA5B	na	ADCY5	ADCY5	na	na	na	ADCY5	na	na	na	na	na	ADCY5	DIRC2;SEMA5B
rs11719201	LDL	3	123068744	C	T	0.779145	0.0099	0.0015	10.386	8.6847	0.005294	na	na	na	DIRC2;SEMA5B	na	PDIA5	ADCY5	na	ADCY5	na	na	na	na	na	na	na	ADCY5	DIRC2;PDIA5;SEMA5B
rs11719201	TC	3	123068744	C	T	0.785014	0.014	0.0015	19.9889	17.8139	0.006807	na	na	na	DIRC2;RP11-67L2.2;SEMA5B;RP11-797D24.3	RP11-67L2.2;SEMA5B	PDIA5	ADCY5	na	SEMA5B	na	na	na	na	na	na	na	SEMA5B	ADCY5;DIRC2;PDIA5;RP11-67L2.2;RP11-797D24.3
rs2011442	LDL	3	124959834	C	T	0.345399	-0.0109	0.0013	16.2934	11.647	0.4406	na	ALG1L	na	SLC12A8;ZNF148	SLC12A8;ZNF148	MUC13	SLC12A8	na	ZNF148	OSBPL11	na	na	na	na	na	na	SLC12A8;ZNF148	ALG1L;MUC13
rs2011442	TC	3	124959834	C	T	0.344917	-0.0113	0.0013	17.4496	13.579	0.1765	na	na	na	ZNF148	ZNF148	MUC13	SLC12A8	ZNF148	ZNF148	OSBPL11	na	ZNF148	na	na	na	ZNF148	na	MUC13;SLC12A8
rs9862203	TC	3	126058362	G	A	0.750563	0.0125	0.0014	18.365	14.1728	0.6441	na	na	na	RP11-71E19.1;RP11-71E19.2;KLF15	RP11-71E19.1	ALDH1L1	KLF15	na	na	KLF15	na	na	na	na	na	na	KLF15	ALDH1L1;RP11-71E19.1;RP11-71E19.2
rs7641302	LDL	3	126060315	C	T	0.757714	0.0136	0.0015	18.9111	15.7531	0.2548	na	na	na	RP11-71E19.1;RP11-71E19.2;KLF15	RP11-71E19.1	ALDH1L1	KLF15	KLF15	na	KLF15	na	KLF15	na	na	na	KLF15	na	ALDH1L1;RP11-71E19.1;RP11-71E19.2
rs12489933	LDL	3	127281890	G	A	0.879512	-0.0125	0.0019	10.3244	8.61314	0.009971	na	TPRA1;AC084035.1	TPRA1;AC084035.1	RP11-59J16.3;RP11-153F10.2;TPRA1	RP11-153F10.2;TPRA1	SEC61A1	TPRA1	na	na	MGLL	na	na	na	na	na	TPRA1	na	AC084035.1;RP11-153F10.2;RP11-59J16.3;SEC61A1
rs62264113	TC	3	127292333	G	A	0.877697	-0.0121	0.0018	10.7472	7.74686	0.1119	na	AC084035.1;TPRA1	TPRA1;AC084035.1	RP11-59J16.3;RP11-153F10.2;TPRA1;SEC61A1	RP11-153F10.2;TPRA1	SEC61A1	TPRA1	MCM2	na	MGLL	SEC61A1	na	na	na	na	TPRA1	SEC61A1	AC084035.1;MCM2;RP11-153F10.2;RP11-59J16.3
rs56203737	LDL	3	129274936	G	A	0.126935	0.0178	0.0019	20.133	14.6887	0.962	na	na	na	C3orf25;MBD4;IFT122;H1FOO;PLXND1	C3orf25;MBD4;IFT122	H1FX	PLXND1	C3orf25	PLXND1	COPG1;IFT122;TRH	na	na	na	na	na	PLXND1	C3orf25	H1FOO;H1FX;IFT122;MBD4
rs56299595	TC	3	129278182	G	A	0.15447	0.0111	0.0017	10.1803	17.1569	6.15e-11	na	na	na	EFCAB12;MBD4;IFT122;H1FOO;PLXND1;TMCC1	EFCAB12;MBD4;IFT122;TMCC1	H1FX	PLXND1	PLXND1;C3orf25;MBD4	PLXND1	COPG1;IFT122;TRH	na	PLXND1;MBD4	na	na	PLXND1	na	MBD4	C3orf25;EFCAB12;H1FOO;H1FX;IFT122;TMCC1
rs2811468	HDL	3	129296847	G	A	0.203759	0.0126	0.0015	16.3502	12.1536	0.08955	na	na	na	EFCAB12;MBD4;IFT122;H1FOO;PLXND1	EFCAB12;MBD4;IFT122	H1FX	PLXND1	PLXND1	na	COPG1;IFT122;TRH	na	PLXND1	na	na	na	PLXND1	na	EFCAB12;H1FOO;H1FX;IFT122;MBD4
rs115771255	nonHDL	3	132119691	T	A	0.0889167	-0.0331	0.0027	33.8243	30.2006	0.03248	na	na	na	DNAJC13;ACKR4;UBA5	DNAJC13;UBA5	na	DNAJC13	NPHP3;DNAJC13	na	NPHP3	na	DNAJC13	na	na	na	DNAJC13	na	ACKR4;NPHP3;UBA5
rs74341202	LDL	3	132183991	G	A	0.951527	0.0425	0.0031	42.0513	35.4249	0.9179	na	DNAJC13	DNAJC13	DNAJC13;ACKR4;UBA5;NPHP3	DNAJC13;UBA5	ACAD11	DNAJC13	NPHP3;DNAJC13	DNAJC13	NPHP3	na	NPHP3;DNAJC13	na	DNAJC13	na	na	NPHP3	ACAD11;ACKR4;UBA5
rs74341202	TC	3	132183991	G	A	0.952742	0.0444	0.003	48.8342	41.3838	0.8117	na	DNAJC13	DNAJC13	DNAJC13;ACKR4;UBA5;NPHP3	DNAJC13;UBA5	ACAD11	DNAJC13	DNAJC13;NPHP3	DNAJC13	NPHP3	na	DNAJC13;NPHP3	na	DNAJC13	na	na	NPHP3	ACAD11;ACKR4;UBA5
rs6762415	HDL	3	133478557	G	T	0.531802	-0.0085	0.0012	11.8516	7.68396	0.6134	na	TMEM108	na	na	na	CDV3	TF	TF	na	SLCO2A1	na	TF	na	na	na	na	TF	CDV3;TMEM108
rs6794370	LDL	3	133490334	C	A	0.79719	-0.011	0.0017	10.0105	9.3131	0.002482	na	AC080128.1	na	na	na	TF	TF	TF	na	SLCO2A1	TF	TF	na	na	na	TF	na	AC080128.1
rs6794370	TC	3	133490334	C	A	0.796053	-0.0129	0.0016	15.1264	12.6384	0.01959	na	AC080128.1	na	TF;SRPRB	na	TF	TF	TF	na	SLCO2A1	TF	TF	na	na	TF	na	na	AC080128.1;SRPRB
rs687339	HDL	3	135932359	C	T	0.217309	0.0244	0.0015	58.7691	48.6479	0.1643	na	na	na	MSL2;PCCB;STAG1	MSL2;PCCB;STAG1	STAG1	MSL2	MSL2;STAG1;PCCB	na	na	STAG1	MSL2;STAG1;PCCB	na	na	na	MSL2;STAG1	PCCB	na
rs687339	nonHDL	3	135932359	C	T	0.216948	-0.0187	0.0018	24.5551	20.6849	0.0562	na	na	na	MSL2;PCCB;STAG1	MSL2;PCCB;STAG1	na	MSL2	PCCB;STAG1;MSL2	na	na	na	PCCB;STAG1;MSL2	na	na	na	MSL2	PCCB;STAG1	na
rs684773	logTG	3	135956305	C	A	0.803221	0.0243	0.0016	51.3686	41.7215	0.4514	na	MSL2	MSL2	MSL2;PCCB;STAG1	MSL2;PCCB;STAG1	STAG1	PCCB	MSL2;PCCB;STAG1;PPP2R3A	na	na	STAG1	MSL2;PCCB;STAG1	na	na	na	MSL2;PCCB;STAG1	na	PPP2R3A
rs1711171	LDL	3	136020541	C	T	0.771104	0.0121	0.0015	15.1412	11.1438	0.4096	na	na	na	MSL2;PCCB;STAG1	MSL2;PCCB;STAG1	STAG1	PCCB	PCCB	na	na	STAG1	PCCB	na	na	na	PCCB	STAG1	MSL2
rs6771713	TC	3	136450593	C	T	0.68471	-0.0098	0.0014	11.5918	8.48967	0.5965	na	na	na	PCCB;STAG1;SLC35G2;NCK1;IL20RB	PCCB;STAG1;SLC35G2;NCK1;IL20RB	STAG1	STAG1	NCK1;PCCB;MSL2;STAG1	PCCB	na	STAG1	NCK1;PCCB;STAG1	na	na	STAG1	PCCB	NCK1	IL20RB;MSL2;SLC35G2
rs111834982	nonHDL	3	142019751	G	A	0.124791	-0.0146	0.0022	10.4928	7.88443	0.2036	na	na	na	ATP1B3;XRN1	ATP1B3	na	XRN1	PLS1	XRN1	GK5;TRPC1	na	na	na	na	na	XRN1	na	ATP1B3;PLS1
rs73238159	logTG	3	142078759	C	T	0.879391	0.0142	0.0019	13.108	9.40487	0.7158	na	na	na	XRN1;PLS1;TRPC1;PCOLCE2	PLS1	ATR	XRN1	XRN1	XRN1	GK5;TRPC1	na	XRN1	na	na	XRN1	na	na	ATR;PCOLCE2;PLS1;TRPC1
rs73238159	TC	3	142078759	C	T	0.879295	0.0157	0.0019	15.8481	12.3576	0.766	na	PCOLCE2;PAQR9-AS1;AC021074.1	PAQR9-AS1;PCOLCE2	ATP1B3;XRN1;PLS1;TRPC1;PCOLCE2	ATP1B3;PLS1;PCOLCE2	XRN1	XRN1	PLS1;XRN1	XRN1	GK5;TRPC1	XRN1	PLS1;XRN1	na	XRN1	na	na	PCOLCE2;PLS1	AC021074.1;ATP1B3;PAQR9-AS1;TRPC1
rs11711179	LDL	3	142159885	G	A	0.876515	0.0128	0.0019	10.7908	7.5279	0.5873	na	PAQR9	PAQR9	XRN1;PCOLCE2	na	na	XRN1	PLS1	na	GK5;TRPC1	na	na	na	na	na	na	XRN1	PAQR9;PCOLCE2;PLS1
rs9832727	nonHDL	3	142649110	G	C	0.307663	-0.0155	0.0016	21.4675	16.6945	0.1218	na	PAQR9;AC021074.3	PAQR9;AC021074.3	XRN1;PCOLCE2;PAQR9	PAQR9	na	PAQR9	PAQR9;PCOLCE2	na	TRPC1	na	PAQR9;PCOLCE2	na	na	PAQR9	na	PCOLCE2	AC021074.3;XRN1
rs9832727	TC	3	142649110	G	C	0.317506	-0.0144	0.0013	27.7895	22.6763	0.01383	na	AC021074.3	AC021074.3	XRN1;PLS1;TRPC1;PCOLCE2;PAQR9	PLS1;PCOLCE2;PAQR9	XRN1	PAQR9	PAQR9	na	TRPC1	XRN1	PAQR9	na	na	na	PAQR9	XRN1	AC021074.3;PCOLCE2;PLS1;TRPC1
rs9653945	LDL	3	142660706	G	A	0.675369	0.0121	0.0014	17.261	14.8362	0.348	na	AC021074.3	AC021074.3	XRN1;PCOLCE2;PAQR9	PAQR9	na	PAQR9	PAQR9	na	TRPC1	na	PAQR9	na	na	na	PAQR9	na	AC021074.3;PCOLCE2;XRN1
rs9653945	logTG	3	142660706	G	A	0.67568	0.0121	0.0013	19.8839	16.1181	0.02018	na	AC021074.3	AC021074.3	XRN1;PLS1;TRPC1;PCOLCE2;PAQR9	PLS1;PAQR9	ATR	PAQR9	PAQR9	na	TRPC1	na	PAQR9	na	na	na	PAQR9	na	AC021074.3;ATR;PCOLCE2;PLS1;TRPC1;XRN1
rs143201630	TC	3	145924454	C	A	0.993581	0.0685	0.0098	11.5602	7.93511	0.2956	na	na	na	na	na	na	PLSCR4	na	PLSCR4;PLSCR2	PLSCR1	na	na	na	na	na	na	PLSCR4	PLSCR2
rs884370	nonHDL	3	147076791	G	T	0.763041	-0.0126	0.0017	12.9044	9.35072	0.3878	na	na	na	na	na	na	ZIC4	na	na	na	na	na	na	na	na	na	na	ZIC4
rs884370	TC	3	147076791	G	T	0.761289	-0.0101	0.0014	12.2659	8.43768	0.7383	na	na	na	na	na	na	ZIC4	na	na	na	na	na	na	na	na	na	na	ZIC4
rs62271373	HDL	3	150066540	T	A	0.950265	0.0364	0.0031	31.1096	26.8597	0.6165	na	na	na	na	na	SERP1	TSC22D2	TSC22D2	na	na	na	TSC22D2	na	na	na	na	TSC22D2	SERP1
rs62271373	logTG	3	150066540	T	A	0.950291	-0.0351	0.003	30.8946	24.9879	0.2823	na	na	na	PFN2	na	SERP1	TSC22D2	TSC22D2	na	na	na	TSC22D2	na	na	na	na	TSC22D2	PFN2;SERP1
rs1426383	HDL	3	152016969	C	T	0.689111	-0.0128	0.0014	19.2159	15.2511	0.9252	na	na	na	na	na	AADAC	MBNL1	MBNL1	na	na	na	MBNL1	na	na	na	na	MBNL1	AADAC
rs16846895	HDL	3	153851061	G	A	0.168378	-0.0118	0.0017	11.4102	8.05287	0.3326	na	ARHGEF26	na	na	na	na	ARHGEF26	DHX36	ARHGEF26-AS1;ARHGEF26	na	na	na	na	na	na	ARHGEF26	na	ARHGEF26-AS1;DHX36
rs439765	nonHDL	3	155532694	T	A	0.246139	0.0133	0.0017	14.2894	10.4036	0.5686	na	SLC33A1	SLC33A1	C3orf33;SLC33A1	SLC33A1	na	SLC33A1	SLC33A1	SLC33A1	na	na	SLC33A1	na	SLC33A1	na	na	na	C3orf33
rs6787781	logTG	3	155535351	G	C	0.687532	-0.0115	0.0014	15.6707	11.7328	0.4763	na	SLC33A1	SLC33A1	PLCH1;C3orf33;SLC33A1;GMPS;KCNAB1	PLCH1;SLC33A1;GMPS	na	SLC33A1	SLC33A1	na	na	na	SLC33A1	na	na	SLC33A1	na	na	C3orf33;GMPS;KCNAB1;PLCH1
rs76440173	LDL	3	155546124	C	T	0.995433	-0.0793	0.0109	12.4611	10.0404	0.568	na	SLC33A1	SLC33A1	SLC33A1	SLC33A1	na	SLC33A1	na	SLC33A1	na	na	na	na	na	SLC33A1	na	na	na
rs407258	TC	3	155560978	C	T	0.2409	0.0116	0.0014	15.9303	12.456	0.085	na	SLC33A1	SLC33A1	PLCH1;C3orf33;SLC33A1	PLCH1;SLC33A1	na	SLC33A1	C3orf33	SLC33A1	na	na	C3orf33	na	na	SLC33A1	na	C3orf33	PLCH1
rs62285077	HDL	3	156244888	C	T	0.842148	-0.0094	0.0017	7.49308	7.4919	0.0002942	na	na	na	na	na	SSR3	KCNAB1	SSR3	na	na	na	na	na	na	na	na	SSR3	KCNAB1
rs67261871	HDL	3	156797941	C	T	0.39024	0.0205	0.0013	55.2953	49.2437	0.2134	na	TIPARP	TIPARP	na	na	CCNL1	LEKR1	na	na	na	na	na	na	na	na	na	na	CCNL1;LEKR1;TIPARP
rs67261871	logTG	3	156797941	C	T	0.388426	-0.0178	0.0013	41.9474	37.5728	0.1286	na	TIPARP	TIPARP	TIPARP;LINC00886;LINC00880;RP11-6F2.5;LINC00881;CCNL1	LINC00881	CCNL1	LEKR1	na	na	na	CCNL1	na	na	na	na	na	CCNL1;TIPARP	LEKR1;LINC00880;LINC00881;LINC00886;RP11-6F2.5
rs4679881	LDL	3	160028014	C	T	0.518866	-0.0128	0.0013	22.1474	17.7418	0.8198	na	TRIM59;IFT80	TRIM59	C3orf80;IFT80;SMC4;TRIM59;KPNA4	IFT80;SMC4;TRIM59;KPNA4	na	RP11-432B6.3	KPNA4	RP11-432B6.3;SMC4	IFT80;IL12A;PPM1L	na	KPNA4	na	na	na	na	IFT80;KPNA4;RP11-432B6.3;SMC4;TRIM59	C3orf80
rs55687857	TC	3	160029964	G	C	0.491539	0.0153	0.0012	36.5062	28.5055	0.7379	na	TRIM59;IFT80	TRIM59	C3orf80;IFT80;SMC4;TRIM59;KPNA4	IFT80;SMC4;TRIM59;KPNA4	SMC4	RP11-432B6.3	KPNA4	RP11-432B6.3;SMC4	IFT80;IL12A;PPM1L	SMC4	KPNA4	na	na	na	SMC4	IFT80;KPNA4;RP11-432B6.3;TRIM59	C3orf80
rs60009222	nonHDL	3	160063356	C	A	0.507384	-0.0122	0.0015	15.3792	11.309	0.8625	na	na	na	IFT80;SMC4;TRIM59;KPNA4	SMC4;TRIM59;KPNA4	na	RP11-432B6.3	KPNA4;KRT8P12	RP11-432B6.3;SMC4	IFT80;IL12A;PPM1L	na	KPNA4	na	na	na	na	KPNA4;RP11-432B6.3;SMC4	IFT80;KRT8P12;TRIM59
rs10513688	TC	3	170727218	G	A	0.896879	-0.0172	0.002	17.0985	13.5482	0.724	na	na	na	EIF5A2;SLC2A2	SLC2A2	SLC2A2	SLC2A2	SLC2A2	SLC2A2	SLC2A2;TNIK	SLC2A2	SLC2A2	na	SLC2A2	na	na	na	EIF5A2
rs5400	logTG	3	170732300	G	A	0.856152	-0.0216	0.0018	32.4494	26.2103	0.4849	na	na	na	EIF5A2;SLC2A2	SLC2A2	SLC2A2	SLC2A2	SLC2A2;RPL22L1	SLC2A2	SLC2A2;TNIK	SLC2A2	SLC2A2	na	SLC2A2	na	na	na	EIF5A2;RPL22L1
rs11711206	nonHDL	3	170732945	G	A	0.0950965	0.0184	0.0026	11.8315	9.3121	0.1837	na	na	na	SLC2A2	SLC2A2	SLC2A2	SLC2A2	SLC2A2	na	SLC2A2;TNIK	SLC2A2	SLC2A2	na	na	SLC2A2	na	na	na
rs57005472	LDL	3	170758329	G	T	0.088652	0.0144	0.0023	9.41699	8.06512	0.03954	na	na	na	SLC2A2	SLC2A2	SLC2A2	SLC2A2	SLC2A2	na	SLC2A2;TNIK	SLC2A2	SLC2A2	na	na	SLC2A2	na	na	na
rs4515081	LDL	3	171536255	G	T	0.159769	0.0131	0.0017	13.8862	10.5966	0.272	na	na	na	na	na	FNDC3B	PLD1	PLD1	na	TNIK	na	PLD1	na	na	na	na	PLD1	FNDC3B
rs4894529	HDL	3	171959684	G	A	0.541661	-0.0083	0.0013	9.7649	9.01596	0.002288	na	TNIK	na	na	na	FNDC3B	FNDC3B	FNDC3B	FNDC3B	na	FNDC3B	FNDC3B	na	na	FNDC3B	na	na	TNIK
rs79287178	logTG	3	172294500	G	A	0.972331	-0.06	0.0041	47.7693	40.3158	0.4249	na	na	na	TNFSF10	na	FNDC3B	TNFSF10	na	na	na	na	na	na	na	na	na	TNFSF10	FNDC3B
rs9844949	TC	3	185820283	G	A	0.874629	0.0182	0.0018	23.307	17.9284	0.2871	na	na	na	ETV5	ETV5	na	ETV5	na	na	IGF2BP2;TRA2B	na	na	na	na	na	na	ETV5	na
rs1516725	HDL	3	185824004	C	T	0.871558	0.0292	0.0019	52.5742	45.7311	0.4413	na	na	na	na	na	ETV5	ETV5	na	na	IGF2BP2;TRA2B	ETV5	na	na	na	na	na	ETV5	na
rs139828053	HDL	3	195298892	C	T	0.0271993	-0.0294	0.0042	11.5918	8.02326	0.8663	na	na	na	na	na	TNK2	APOD	na	na	APOD;TNK2	na	na	na	na	na	na	na	APOD;TNK2
rs397726270	LDL	3	195942080	TG	T	0.605063	-0.0105	0.0015	11.5918	10.4818	0.01769	na	SLC51A	na	na	na	MUC20	SLC51A	na	na	SLC51A;TNK2	na	na	na	na	na	na	SLC51A	MUC20
rs397726270	TC	3	195942080	TG	T	0.620523	-0.0095	0.0015	9.61993	9.04025	0.00735	na	SLC51A	na	na	na	TNK2	SLC51A	na	na	SLC51A;TNK2	na	na	na	na	na	na	SLC51A	TNK2
rs4916497	HDL	3	196198533	C	T	0.677184	0.009	0.0014	9.89005	7.99204	0.02912	na	TM4SF19-AS1;RNF168	RNF168	na	na	PAK2	RNF168	UBXN7;C3orf43;UBXN7-AS1	na	SLC51A	na	na	na	na	na	na	RNF168	C3orf43;PAK2;TM4SF19-AS1;UBXN7;UBXN7-AS1
rs34311866	logTG	4	951947	C	T	0.172856	0.0175	0.0017	24.1255	19.7528	0.9021	na	DGKQ	na	GAK;TMEM175;DGKQ;SLC26A1;IDUA	GAK;TMEM175;DGKQ;IDUA	CTBP1	TMEM175	na	DGKQ;TMEM175	PDE6B;TMEM175	na	na	na	na	na	DGKQ;TMEM175	na	CTBP1;GAK;IDUA;SLC26A1
rs13101828	HDL	4	965720	G	A	0.451572	0.0135	0.0013	24.5356	19.799	0.6286	na	IDUA;SLC26A1;DGKQ;AC016773.1	IDUA	na	na	CTBP1	DGKQ	GAK;SLC26A1;IDUA	DGKQ;TMEM175	PDE6B;TMEM175	na	SLC26A1;IDUA	na	na	na	DGKQ	IDUA;SLC26A1	AC016773.1;CTBP1;GAK;TMEM175
rs13101828	nonHDL	4	965720	G	A	0.454478	-0.0108	0.0015	12.2203	8.39893	0.7615	na	DGKQ;IDUA;AC016773.1	DGKQ;IDUA	DGKQ;SLC26A1;IDUA	DGKQ;IDUA	DGKQ	DGKQ	SLC26A1;GAK;IDUA	na	PDE6B;TMEM175	DGKQ	SLC26A1;IDUA	na	na	DGKQ	IDUA	SLC26A1	AC016773.1;GAK
rs28619238	HDL	4	2260812	C	T	0.183643	0.012	0.0017	11.7749	8.3781	0.6504	na	na	na	FAM193A	na	MXD4	MXD4	POLN	MIR4800;MXD4	ZFYVE28	MXD4	na	na	na	na	MXD4	na	FAM193A;MIR4800;POLN
rs3775067	logTG	4	2888622	G	A	0.605383	-0.0113	0.0013	17.4496	15.6842	0.001427	na	DOK7;LRPAP1	na	SH3BP2;ADD1;MFSD10;NOP14;GRK4;HTT;MSANTD1;RGS12	ADD1;MFSD10;NOP14;GRK4;HTT;MSANTD1;RGS12	HTT	ADD1	na	na	ZFYVE28	HTT	na	na	na	na	na	ADD1;HTT	DOK7;GRK4;LRPAP1;MFSD10;MSANTD1;NOP14;RGS12;SH3BP2
rs3775067	nonHDL	4	2888622	G	A	0.606378	-0.0095	0.0015	9.61993	7.52144	0.08399	na	DOK7;LRPAP1	na	SH3BP2;MFSD10;MSANTD1;RGS12	na	ADD1	ADD1	ADD1	na	ZFYVE28	ADD1	ADD1	na	na	na	ADD1	na	DOK7;LRPAP1;MFSD10;MSANTD1;RGS12;SH3BP2
rs362307	HDL	4	3241845	C	T	0.929649	0.0181	0.0026	11.4729	7.90462	0.2816	na	RGS12	RGS12	SH3BP2;MFSD10;MSANTD1;RGS12;HGFAC;DOK7;LRPAP1	HGFAC;DOK7;LRPAP1	ADD1	HTT	HTT	na	na	na	HTT	na	na	na	na	HTT;RGS12	ADD1;DOK7;HGFAC;LRPAP1;MFSD10;MSANTD1;SH3BP2
rs13108218	LDL	4	3443931	G	A	0.600457	-0.0178	0.0013	41.9474	37.4183	0.001406	na	DOK7	na	MSANTD1;RGS12;HGFAC;DOK7;LRPAP1;AC141928.1	HGFAC;DOK7;LRPAP1	LRPAP1	HGFAC	HGFAC	na	na	LRPAP1	HGFAC	na	na	na	HGFAC	DOK7;LRPAP1	AC141928.1;MSANTD1;RGS12
rs13108218	logTG	4	3443931	G	A	0.599897	-0.0273	0.0013	97.1832	86.2256	0.003901	na	DOK7	na	NOP14;GRK4;HTT;MSANTD1;RGS12;HGFAC;DOK7;LRPAP1;AC141928.1	NOP14;GRK4;HTT;MSANTD1;RGS12;HGFAC;DOK7;LRPAP1	HTT	HGFAC	HGFAC	HGFAC;DOK7	na	HTT	HGFAC	na	na	HGFAC	DOK7	HTT	AC141928.1;GRK4;LRPAP1;MSANTD1;NOP14;RGS12
rs13108218	nonHDL	4	3443931	G	A	0.602721	-0.0262	0.0015	67.5899	57.7292	0.03717	na	DOK7	na	MSANTD1;RGS12;HGFAC;DOK7;LRPAP1;AC141928.1	HGFAC;DOK7;LRPAP1	LRPAP1	HGFAC	HGFAC	na	na	LRPAP1	HGFAC	na	na	na	HGFAC	DOK7;LRPAP1	AC141928.1;MSANTD1;RGS12
rs13108218	TC	4	3443931	G	A	0.595782	-0.0244	0.0013	77.8702	75.0341	0.002241	na	DOK7	na	HTT;MSANTD1;RGS12;HGFAC;DOK7;LRPAP1;AC141928.1	HTT;MSANTD1;RGS12;HGFAC;DOK7;LRPAP1	HTT	HGFAC	HGFAC	na	na	HTT	HGFAC	na	na	na	HGFAC	DOK7;HTT	AC141928.1;LRPAP1;MSANTD1;RGS12
rs4450871	HDL	4	4990298	G	A	0.468628	0.011	0.0014	14.4056	10.1653	0.7792	na	na	na	na	na	na	CYTL1	na	na	na	na	na	na	na	na	na	na	CYTL1
rs4450871	logTG	4	4990298	G	A	0.468733	-0.0139	0.0014	22.5049	17.744	0.5653	na	na	na	na	na	na	CYTL1	CYTL1	na	na	na	CYTL1	na	na	na	na	CYTL1	na
rs4234798	nonHDL	4	7219933	G	T	0.622482	0.0113	0.0015	13.3057	9.32462	0.803	na	SORCS2;MAN2B2	SORCS2	SORCS2	SORCS2	TBC1D14	SORCS2	na	na	na	na	na	na	na	na	SORCS2	na	MAN2B2;TBC1D14
rs4689088	LDL	4	7222253	G	A	0.373104	-0.0112	0.0013	17.1567	13.1547	0.8343	na	SORCS2;MAN2B2	SORCS2	SORCS2	SORCS2	na	SORCS2	na	na	na	na	na	na	na	na	SORCS2	na	MAN2B2
rs4689653	TC	4	7223319	G	T	0.628401	0.0103	0.0012	17.0354	11.9099	0.6496	na	SORCS2;MAN2B2	SORCS2	TBC1D14;SORCS2	SORCS2	TBC1D14	SORCS2	na	na	na	TBC1D14	na	na	na	na	SORCS2	TBC1D14	MAN2B2
rs62409270	LDL	4	15028043	G	C	0.678936	-0.0091	0.0014	10.0952	8.27955	0.2561	na	LINC00504;AC098829.1;CPEB2	na	LINC00504;CPEB2	CPEB2	na	CPEB2	na	CPEB2-AS1;RP11-665G4.1;CPEB2	na	na	na	na	na	CPEB2	na	LINC00504	AC098829.1;CPEB2-AS1;RP11-665G4.1
rs7700107	nonHDL	4	17880416	C	A	0.142508	0.0148	0.0021	11.7399	8.53662	0.649	na	na	na	DCAF16;NCAPG;LCORL	DCAF16;NCAPG	na	LCORL	na	na	na	na	na	na	na	na	na	LCORL	DCAF16;NCAPG
rs16895971	logTG	4	17884986	C	T	0.138574	0.0217	0.0018	32.7416	25.5243	0.802	na	na	na	FAM184B;DCAF16;NCAPG;LCORL	FAM184B;DCAF16;NCAPG;LCORL	LCORL	LCORL	na	na	na	LCORL	na	na	na	na	LCORL	na	DCAF16;FAM184B;NCAPG
rs7673321	HDL	4	17957688	T	A	0.851995	0.0138	0.0017	15.323	11.8357	0.07733	na	na	na	na	na	LCORL	LCORL	na	na	na	LCORL	na	na	na	na	na	LCORL	na
rs73243877	HDL	4	26047616	G	A	0.148904	-0.0208	0.0018	30.1599	25.7549	0.1671	na	RBPJ	na	na	na	na	SMIM20	RBPJ	na	CCKAR;RBPJ	na	RBPJ	na	na	na	na	RBPJ	SMIM20
rs73243877	logTG	4	26047616	G	A	0.149005	0.0216	0.0018	32.4494	27.9994	0.3465	na	na	na	RBPJ	na	na	SMIM20	RBPJ	na	CCKAR;RBPJ	na	RBPJ	na	na	na	na	RBPJ	SMIM20
rs6448432	nonHDL	4	26098810	G	A	0.736998	-0.011	0.0017	10.0105	9.66746	0.004521	na	SEPSECS-AS1;RBPJ	na	RBPJ	na	na	RBPJ	RBPJ	na	CCKAR;RBPJ	na	RBPJ	na	na	RBPJ	na	na	SEPSECS-AS1
rs3912391	HDL	4	39698824	G	A	0.506424	-0.009	0.0013	11.3546	8.2152	0.6674	na	UBE2K	UBE2K	PDS5A;N4BP2	na	PDS5A	UBE2K	na	na	KLB;RFC1	PDS5A	na	na	na	na	na	PDS5A;UBE2K	N4BP2
rs3912391	logTG	4	39698824	G	A	0.506007	0.0078	0.0012	10.0952	7.72985	0.03272	na	UBE2K	UBE2K	UBE2K	UBE2K	PDS5A	UBE2K	na	na	KLB;RFC1	na	na	na	na	na	UBE2K	na	PDS5A
rs10938398	HDL	4	45186139	G	A	0.595752	0.009	0.0013	11.3546	8.78194	0.04545	na	na	na	na	na	na	GNPDA2	na	na	na	na	na	na	na	na	na	na	GNPDA2
rs17083112	LDL	4	54453676	C	T	0.14692	-0.0127	0.0018	11.7647	9.1486	0.2132	na	LNX1	na	LNX1	na	na	FIP1L1	na	na	na	na	na	na	na	na	na	LNX1	FIP1L1
rs35484700	logTG	4	55498781	C	CG	0.462579	-0.0095	0.0013	12.5658	10.5049	0.006461	na	na	na	KIT	KIT	KIT	KIT	na	na	KIT	KIT	na	na	na	na	KIT	na	na
rs150361490	HDL	4	55530748	ATTATTTAT	A	0.552668	-0.0109	0.0014	14.1591	11.1367	0.3107	na	na	na	na	na	KDR	KIT	na	na	KIT	na	na	na	na	na	na	na	KDR;KIT
rs35662434	HDL	4	69339933	G	A	0.211427	0.0149	0.0016	19.9036	14.665	0.9472	na	na	na	TMPRSS11E;UGT2B17;UGT2B15;RP11-468N14.13;UGT2A3	UGT2B17;UGT2B15	na	TMPRSS11E	na	TMPRSS11E	na	na	na	na	na	na	TMPRSS11E	na	RP11-468N14.13;UGT2A3;UGT2B15;UGT2B17
rs4860987	LDL	4	69491284	T	A	0.242857	0.031	0.0018	65.7425	59.0589	0.4287	na	UGT2B17	UGT2B17	TMPRSS11E;UGT2B17;UGT2B15;RP11-468N14.13;UGT2A3;UGT2B7	UGT2B17;UGT2B15;UGT2B7	UGT2B10	UGT2B15	na	na	na	na	na	na	na	na	na	UGT2B15;UGT2B17	RP11-468N14.13;TMPRSS11E;UGT2A3;UGT2B10;UGT2B7
rs4860987	nonHDL	4	69491284	T	A	0.247876	0.0329	0.0021	54.5924	50.079	0.6186	na	UGT2B17	UGT2B17	TMPRSS11E;UGT2B17;UGT2B15;RP11-468N14.13;UGT2A3;UGT2B7	UGT2B17;UGT2B15;UGT2B7	UGT2B10	UGT2B15	na	UGT2B7	na	na	na	na	na	na	na	UGT2B15;UGT2B17;UGT2B7	RP11-468N14.13;TMPRSS11E;UGT2A3;UGT2B10
rs4860987	TC	4	69491284	T	A	0.243059	0.0386	0.0017	113.407	96.3914	0.4405	na	UGT2B17	UGT2B17	YTHDC1;TMPRSS11E;UGT2B17;UGT2B15;RP11-468N14.13;UGT2A3;UGT2B7	UGT2B17;UGT2B15;UGT2B7	UGT2B10	UGT2B15	na	UGT2B7	na	na	na	na	na	na	na	UGT2B15;UGT2B17;UGT2B7	RP11-468N14.13;TMPRSS11E;UGT2A3;UGT2B10;YTHDC1
rs293435	logTG	4	69588052	C	T	0.66942	-0.0154	0.0014	27.4178	22.6809	0.309	na	na	na	YTHDC1;TMPRSS11E;UGT2B17;UGT2B15;RP11-468N14.13	UGT2B17;UGT2B15	UGT2B10	UGT2B15	na	na	na	na	na	na	na	na	na	UGT2B15	RP11-468N14.13;TMPRSS11E;UGT2B10;UGT2B17;YTHDC1
rs183970949	TC	4	70117093	C	T	0.995146	0.0832	0.0099	16.3651	13.2626	0.565	na	na	na	RP11-468N14.13;UGT2A3;UGT2B7;UGT2B11	UGT2B7;UGT2B11	UGT2B10	UGT2B28	na	UGT2B7;UGT2B11	na	na	na	na	na	na	na	UGT2B11;UGT2B7	RP11-468N14.13;UGT2A3;UGT2B10;UGT2B28
rs187479321	LDL	4	70264840	G	A	0.00406395	-0.084	0.011	13.6508	10.5607	0.4051	na	na	na	RP11-468N14.13;UGT2A3;UGT2B7;UGT2B4	UGT2B7;UGT2B4	UGT2B4	UGT2B4	na	UGT2B7	na	UGT2B4	na	na	na	na	UGT2B4	UGT2B7	RP11-468N14.13;UGT2A3
rs187479321	nonHDL	4	70264840	G	A	0.00423036	-0.0887	0.0126	11.7152	8.81001	0.3679	na	na	na	RP11-468N14.13;UGT2A3;UGT2B7	UGT2B7	UGT2B4	UGT2B4	na	UGT2B7;UGT2B4	na	UGT2B4	na	na	na	na	UGT2B4	UGT2B7	RP11-468N14.13;UGT2A3
rs142641018	nonHDL	4	71297926	C	T	0.997339	-0.1119	0.0175	9.79237	7.78088	0.6275	na	na	na	na	na	IGJ	MUC7	na	na	ENAM	na	na	na	na	na	na	na	IGJ;MUC7
rs368790862	nonHDL	4	71820941	G	A	0.997395	-0.1113	0.0193	8.09274	11.7047	1	na	na	na	na	na	IGJ	MOB1B	na	na	na	na	na	na	na	na	na	na	IGJ;MOB1B
rs938075289	LDL	4	72754788	C	A	0.00151418	0.3237	0.0232	43.518	37.0218	1	na	na	na	na	na	GC	GC	na	na	na	GC	na	na	na	na	na	GC	na
rs938075289	nonHDL	4	72754788	C	A	0.00163511	0.3079	0.0236	38.1776	31.7064	1	na	na	na	na	na	GC	GC	na	na	na	GC	na	na	na	na	na	GC	na
rs938075289	TC	4	72754788	C	A	0.00153749	0.364	0.0225	58.1405	48.4812	1	na	na	na	na	na	GC	GC	na	na	na	GC	na	na	na	na	na	GC	na
rs537526354	LDL	4	73491622	G	A	0.998096	-0.3994	0.0217	74.9258	65.2722	1	na	na	na	na	na	ANKRD17	ADAMTS3	na	na	na	na	na	na	na	na	na	na	ADAMTS3;ANKRD17
rs537526354	nonHDL	4	73491622	G	A	0.998111	-0.4009	0.0223	71.5347	61.7126	1	na	na	na	na	na	na	ADAMTS3	na	na	na	na	na	na	na	na	na	na	ADAMTS3
rs537526354	TC	4	73491622	G	A	0.998132	-0.4593	0.0212	103.359	87.53	1	na	na	na	na	na	ANKRD17	ADAMTS3	na	na	na	na	na	na	na	na	na	na	ADAMTS3;ANKRD17
rs187918276	LDL	4	74033564	G	C	0.998685	-0.467	0.0216	102.937	88.5875	0.0476	na	na	na	na	na	ALB	ANKRD17	na	ALB	na	na	na	na	na	na	na	ALB	ANKRD17
rs573930512	HDL	4	74512280	G	A	0.998003	-0.1578	0.0208	13.4834	9.41591	1	na	PF4	na	na	na	ANKRD17	RASSF6	na	CXCL2	na	na	na	na	na	na	na	na	ANKRD17;CXCL2;PF4;RASSF6
rs573930512	logTG	4	74512280	G	A	0.998031	-0.1562	0.0208	13.2269	8.26284	1	na	na	na	na	na	ANKRD17	RASSF6	na	na	na	na	na	na	na	na	na	na	ANKRD17;RASSF6
rs573930512	nonHDL	4	74512280	G	A	0.998048	-0.4507	0.0218	94.2291	81.5563	1	na	na	na	na	na	ALB	RASSF6	na	ALB	na	na	na	na	na	na	na	ALB	RASSF6
rs573930512	TC	4	74512280	G	A	0.9981	-0.5122	0.0206	135.74	115.276	1	na	na	na	na	na	ALB	RASSF6	na	ALB	na	na	na	na	na	na	na	ALB	RASSF6
rs181372486	LDL	4	74793806	G	A	0.998021	-0.3421	0.0202	63.6097	54.9157	0.2933	na	na	na	na	na	AFP	PF4	na	na	EPGN	na	na	na	na	na	na	na	AFP;PF4
rs190217562	TC	4	75180409	C	T	0.00566972	0.0892	0.0102	17.652	43.0057	0.000924	na	na	na	na	na	na	EPGN	na	na	EPGN	na	na	na	na	na	na	na	EPGN
rs189087436	LDL	4	75416194	C	T	0.00150707	0.2327	0.0196	31.7836	30.9983	0.01738	na	na	na	na	na	na	AREGB	na	na	EPGN	na	na	na	na	na	na	na	AREGB
rs77021821	nonHDL	4	75684215	C	T	0.986822	-0.037	0.0076	5.94887	15.9032	0.9638	na	na	na	na	na	na	BTC	na	na	na	na	na	na	na	na	na	na	BTC
rs77021821	TC	4	75684215	C	T	0.987432	-0.0299	0.0064	5.52511	20.7371	0.2403	na	na	na	na	na	na	BTC	na	na	na	na	na	na	na	na	na	na	BTC
rs2175766	HDL	4	76572191	C	A	0.527372	0.0098	0.0013	13.3228	9.79983	0.3745	na	CCDC158	na	USO1	USO1	USO1	G3BP2	na	na	CXCL9;NAAA	USO1	na	na	na	na	na	USO1	CCDC158;G3BP2
rs7662940	TC	4	76650443	C	T	0.117542	-0.0165	0.0019	17.4186	13.4912	0.5841	na	na	na	CDKL2;G3BP2;USO1	G3BP2;USO1	USO1	USO1	USO1	na	CXCL9;NAAA	USO1	USO1	na	na	USO1	na	na	CDKL2;G3BP2
rs324682	nonHDL	4	76740008	G	A	0.120231	-0.014	0.0023	8.93901	7.80986	0.04759	na	na	na	CDKL2;G3BP2;USO1	G3BP2;USO1	USO1	USO1	USO1	na	CXCL9;NAAA	USO1	USO1	na	na	USO1	na	na	CDKL2;G3BP2
rs4493564	LDL	4	77420407	G	A	0.631776	-0.0101	0.0013	14.1026	11.8017	0.3292	na	SHROOM3	SHROOM3	na	na	na	SHROOM3	FAM47E	na	CXCL9	na	na	na	na	na	na	SHROOM3	FAM47E
rs28687959	logTG	4	77421345	C	T	0.455095	-0.01	0.0012	16.1046	12.7332	0.01481	na	CCDC158	na	SCARB2;STBD1;CCDC158;SHROOM3	CCDC158;SHROOM3	na	SHROOM3	SHROOM3	na	CXCL9	na	SHROOM3	na	na	na	SHROOM3	CCDC158	SCARB2;STBD1
rs71607360	TC	4	77439399	C	A	0.0938756	-0.0141	0.0021	10.7236	8.62542	0.0443	na	na	na	na	na	na	SHROOM3	na	na	na	na	na	na	na	na	na	na	SHROOM3
rs11099563	HDL	4	83907105	G	A	0.735656	0.0114	0.0014	15.4133	10.4706	0.8849	na	THAP9-AS1;THAP9	THAP9-AS1	na	na	SEC31A	LIN54	SEC31A	THAP9-AS1;THAP9;SEC31A	na	SEC31A	SEC31A	na	na	na	SEC31A	THAP9;THAP9-AS1	LIN54
rs72663972	logTG	4	87294293	C	A	0.664321	-0.0143	0.0013	27.4178	24.2209	0.001258	na	HSD17B13;KLHL8	na	MAPK10;PTPN13;SLC10A6	MAPK10;PTPN13	na	MAPK10	na	na	MAPK10	na	na	na	na	na	na	MAPK10	HSD17B13;KLHL8;PTPN13;SLC10A6
rs3775228	nonHDL	4	87985166	C	T	0.62011	-0.0178	0.0015	31.7536	24.769	0.6037	na	na	na	PTPN13;SLC10A6;C4orf36;AFF1;KLHL8;HSD17B13;HSD17B11;SPARCL1	C4orf36;AFF1;KLHL8;HSD17B11	HSD17B11	AFF1	AFF1	C4orf36	KLHL8;MAPK10	HSD17B11	AFF1	na	na	na	AFF1	C4orf36;HSD17B11	HSD17B13;KLHL8;PTPN13;SLC10A6;SPARCL1
rs17605615	TC	4	87996745	G	A	0.621697	-0.0122	0.0012	23.5539	17.6452	0.5495	na	na	na	MAPK10;PTPN13;C4orf36;AFF1;KLHL8;HSD17B13;HSD17B11;RP11-710E1.2	C4orf36;KLHL8;HSD17B13;RP11-710E1.2	HSD17B11	AFF1	AFF1	na	KLHL8;MAPK10	HSD17B11	AFF1	na	na	na	AFF1	HSD17B11	C4orf36;HSD17B13;KLHL8;MAPK10;PTPN13;RP11-710E1.2
rs342469	HDL	4	88050554	G	A	0.40305	0.0154	0.0012	36.9719	26.7393	0.5924	na	na	na	C4orf36;AFF1	na	AFF1	AFF1	AFF1	AFF1	KLHL8	AFF1	AFF1	na	AFF1	na	na	na	C4orf36
rs342467	LDL	4	88052219	C	T	0.59711	0.0089	0.0013	11.12	9.41155	0.06378	na	na	na	C4orf36;AFF1	na	AFF1	AFF1	AFF1	AFF1;C4orf36;DSPP	KLHL8	AFF1	AFF1	na	AFF1	na	na	C4orf36	DSPP
rs342466	logTG	4	88053085	C	T	0.390487	-0.027	0.0013	95.0853	88.2896	0.1995	na	na	na	PTPN13;SLC10A6;C4orf36;AFF1;KLHL8;HSD17B13;HSD17B11;NUDT9;RP11-710E1.2;SPARCL1	PTPN13;C4orf36;AFF1;KLHL8;HSD17B13;HSD17B11;NUDT9;RP11-710E1.2;SPARCL1	AFF1	AFF1	AFF1	AFF1	KLHL8	AFF1	AFF1	na	AFF1	na	na	na	C4orf36;HSD17B11;HSD17B13;KLHL8;NUDT9;PTPN13;RP11-710E1.2;SLC10A6;SPARCL1
rs10012528	logTG	4	89724963	G	C	0.485359	0.0125	0.0012	24.6817	19.508	0.02542	na	FAM13A	FAM13A	HERC3;NAP1L5;FAM13A	FAM13A	FAM13A	FAM13A	FAM13A	na	FAM13A	FAM13A	FAM13A	na	FAM13A	na	na	na	HERC3;NAP1L5
rs2167750	HDL	4	89730074	C	T	0.510701	0.0192	0.0012	56.8936	45.624	0.07327	na	FAM13A	FAM13A	na	na	na	FAM13A	FAM13A	na	FAM13A	na	FAM13A	na	na	na	FAM13A	na	na
rs144198753	LDL	4	99713350	C	T	0.988769	0.0568	0.0071	14.9051	10.9098	0.754	na	na	na	na	na	ADH1A	EIF4E	na	na	na	na	na	na	na	na	na	na	ADH1A;EIF4E
rs144198753	TC	4	99713350	C	T	0.98872	0.0472	0.0068	11.4102	7.93752	0.5291	na	na	na	na	na	ADH4	EIF4E	na	na	na	na	na	na	na	na	na	na	ADH4;EIF4E
rs12650112	HDL	4	99788480	C	T	0.59877	-0.0088	0.0013	10.8878	10.9964	0.0001289	na	AP002026.1;ADH5;ADH4	AP002026.1	ADH1B;ADH1C	ADH1B	EIF4E	EIF4E	na	ADH1B	na	EIF4E	na	na	na	na	na	ADH1B;EIF4E	ADH1C;ADH4;ADH5;AP002026.1
rs1126673	logTG	4	100045616	C	T	0.28271	-0.0139	0.0014	22.5049	18.5603	0.09326	MTTP	ADH5;ADH4	ADH4	METAP1;RP11-571L19.8;ADH5;ADH4;ADH6;ADH1B;ADH1C	ADH5;ADH4;ADH1C	MTTP	ADH4	ADH4;ADH6;ADH5	ADH4;RP11-696N14.1;TSPAN5	MTTP;TRMT10A	na	ADH4;ADH6;ADH5	na	ADH4	na	ADH5	ADH6	ADH1B;ADH1C;METAP1;MTTP;RP11-571L19.8;RP11-696N14.1;TSPAN5
rs1229984	nonHDL	4	100239319	C	T	0.909881	0.0266	0.0038	11.5918	13.5032	3.71e-05	MTTP	na	na	ADH4;ADH1B;ADH1C;TRMT10A;MTTP;RP11-766F14.2	ADH1B;TRMT10A	MTTP	ADH1B	ADH1B	ADH1B;MTTP	MTTP;TRMT10A	MTTP	ADH1B	na	na	ADH1B	MTTP	na	ADH1C;ADH4;RP11-766F14.2;TRMT10A
rs1873518	HDL	4	100465173	G	A	0.938396	-0.0291	0.0026	28.3519	22.8683	0.2131	MTTP	na	na	ADH1B;ADH1C;TRMT10A;MTTP;RP11-766F14.2	ADH1B;TRMT10A;MTTP	MTTP	C4orf17	MTTP	ADH1B;MTTP	MTTP;TRMT10A	MTTP	MTTP	na	na	MTTP	na	ADH1B	ADH1C;C4orf17;RP11-766F14.2;TRMT10A
rs9307240	LDL	4	100488580	G	C	0.751372	0.0164	0.0014	30.9678	24.4847	0.2138	MTTP	na	na	ADH1B;ADH1C;TRMT10A;MTTP;RP11-766F14.2	ADH1B;TRMT10A;MTTP	MTTP	MTTP	MTTP	na	MTTP;TRMT10A	MTTP	MTTP	na	na	MTTP	na	na	ADH1B;ADH1C;RP11-766F14.2;TRMT10A
rs1800804	TC	4	100495817	C	T	0.248561	-0.0157	0.0014	28.4597	23.1917	0.4965	MTTP	na	na	ADH1B;ADH1C;TRMT10A;MTTP;RP11-766F14.2	ADH1B;TRMT10A;MTTP	MTTP	MTTP	MTTP;RG9MTD2	MTTP	MTTP;TRMT10A	MTTP	MTTP	na	MTTP	na	na	na	ADH1B;ADH1C;RG9MTD2;RP11-766F14.2;TRMT10A
rs13107325	HDL	4	103188709	C	T	0.941179	0.0817	0.0027	200.404	184.904	0.1218	na	na	na	RP11-499E18.1	na	NFKB1	SLC39A8	SLC39A8	SLC39A8	na	na	SLC39A8	na	na	na	SLC39A8	na	NFKB1;RP11-499E18.1
rs13107325	LDL	4	103188709	C	T	0.940808	0.0253	0.0027	20.141	16.8911	0.1679	na	na	na	RP11-499E18.1	na	NFKB1	SLC39A8	SLC39A8;BANK1	SLC39A8	na	na	SLC39A8	na	na	na	SLC39A8	na	BANK1;NFKB1;RP11-499E18.1
rs13107325	logTG	4	103188709	C	T	0.940831	-0.0365	0.0027	40.9151	36.7589	0.009543	na	na	na	SLC39A8;RP11-499E18.1;MANBA	MANBA	NFKB1	SLC39A8	SLC39A8	SLC39A8	na	na	SLC39A8	na	na	SLC39A8	na	na	MANBA;NFKB1;RP11-499E18.1
rs13107325	TC	4	103188709	C	T	0.940924	0.039	0.0026	50.1342	44.2026	0.06551	na	na	na	SLC39A8;RP11-499E18.1;NFKB1	NFKB1	NFKB1	SLC39A8	BANK1;SLC39A8	SLC39A8	na	NFKB1	SLC39A8	na	na	SLC39A8	na	NFKB1	BANK1;RP11-499E18.1
rs74332078	HDL	4	103766720	G	A	0.968012	0.0349	0.0039	18.4441	14.0887	0.9859	na	na	na	RP11-499E18.1	na	NFKB1	UBE2D3	UBE2D3;MANBA	na	CISD2	na	UBE2D3	na	na	na	na	UBE2D3	MANBA;NFKB1;RP11-499E18.1
rs10017313	logTG	4	103861380	G	A	0.509927	-0.0107	0.0013	15.7305	11.7896	0.6496	na	na	na	RP11-499E18.1;MANBA;UBE2D3;CISD2;SLC9B1;CENPE	MANBA;UBE2D3;CISD2;CENPE	NFKB1	SLC9B1	UBE2D3	SLC9B1	CISD2	na	UBE2D3	na	na	na	SLC9B1	UBE2D3	CENPE;CISD2;MANBA;NFKB1;RP11-499E18.1
rs17617028	LDL	4	106064683	G	A	0.768459	-0.0119	0.0015	14.6709	11.191	0.143	na	PPA2	PPA2	AC004069.2;TET2	na	TET2	TET2	na	na	ARHGEF38	TET2	na	na	na	na	TET2	na	AC004069.2;PPA2
rs9884482	HDL	4	106081636	C	T	0.3735	-0.0111	0.0013	16.8664	12.5031	0.4752	na	na	na	AC004069.2;TET2	na	na	TET2	TET2	na	ARHGEF38	na	TET2	na	na	na	TET2	na	AC004069.2
rs138307849	HDL	4	110095620	C	T	0.00580745	-0.1174	0.0092	36.5668	30.6638	0.7663	na	na	na	na	na	SEC24B	COL25A1	na	na	na	na	na	na	na	na	na	na	COL25A1;SEC24B
rs138307849	logTG	4	110095620	C	T	0.0058555	0.1207	0.0092	38.5945	32.5284	0.8471	na	na	na	na	na	SEC24B	COL25A1	na	na	na	na	na	na	na	na	na	na	COL25A1;SEC24B
rs138307849	nonHDL	4	110095620	C	T	0.0061162	0.0779	0.0109	12.0514	9.59948	0.2539	na	na	na	na	na	SEC24B	COL25A1	na	na	na	na	na	na	na	na	na	na	COL25A1;SEC24B
rs114816312	HDL	4	110638824	C	T	0.993857	0.1259	0.009	43.7394	37.8934	0.2736	na	na	na	EGF	EGF	SEC24B	PLA2G12A	na	PLA2G12A	na	na	na	na	na	na	na	PLA2G12A	EGF;SEC24B
rs114816312	logTG	4	110638824	C	T	0.993821	-0.1332	0.0089	49.9139	43.8905	0.9561	na	na	na	CASP6;ELOVL6	na	ELOVL6	PLA2G12A	na	PLA2G12A	na	ELOVL6	na	na	na	na	na	ELOVL6;PLA2G12A	CASP6
rs114816312	nonHDL	4	110638824	C	T	0.993461	-0.0848	0.0108	14.3873	12.6381	0.06669	na	na	na	na	na	SEC24B	PLA2G12A	na	PLA2G12A	na	na	na	na	na	na	na	PLA2G12A	SEC24B
rs7699288	LDL	4	110942277	G	C	0.689873	0.0101	0.0014	12.2659	9.86021	0.1929	na	na	na	EGF	EGF	ENPEP	EGF	na	na	na	na	na	na	na	na	na	EGF	ENPEP
rs11729857	TC	4	120114100	G	C	0.114346	-0.0137	0.0019	12.2539	9.19441	0.235	na	USP53	USP53	METTL14;USP53;PDE5A	USP53	SEC24D	RP11-455G16.1	FABP2;MYOZ2	na	FABP2	na	na	na	na	na	na	USP53	FABP2;METTL14;MYOZ2;PDE5A;RP11-455G16.1;SEC24D
rs71610255	LDL	4	120128060	C	A	0.117794	-0.0141	0.002	11.7473	8.20315	0.9793	na	na	na	METTL14;USP53;C4orf3;PDE5A	METTL14;USP53	na	RP11-455G16.1	FABP2;MYOZ2	na	FABP2	na	na	na	na	na	na	na	C4orf3;FABP2;METTL14;MYOZ2;PDE5A;RP11-455G16.1;USP53
rs192929239	logTG	4	124641827	G	A	0.0121082	0.0459	0.0061	13.2767	10.1365	0.5411	na	na	na	LINC01091	LINC01091	na	SPRY1	na	na	na	na	na	na	na	na	na	na	LINC01091;SPRY1
rs4435753	LDL	4	128662796	C	T	0.394341	-0.0065	0.0013	6.24162	7.81092	6.13e-05	na	na	na	na	na	na	SLC25A31	C4orf29;MFSD8;LARP1B	LARP1B;INTU	na	na	LARP1B	na	na	na	na	LARP1B	C4orf29;INTU;MFSD8;SLC25A31
rs34659062	TC	4	128999619	C	T	0.409128	-0.0088	0.0012	12.6488	9.02553	0.07755	na	na	na	HSPA4L;LARP1B	na	na	LARP1B	C4orf29;MFSD8	LARP1B	na	na	na	na	na	na	LARP1B	na	C4orf29;HSPA4L;MFSD8
rs7681503	logTG	4	141801478	C	T	0.421899	-0.0092	0.0013	11.8315	8.77172	0.9597	na	RNF150	RNF150	RNF150;ZNF330	RNF150	na	RNF150	na	na	ELMOD2;UCP1	na	na	na	na	na	RNF150	na	ZNF330
rs62328321	HDL	4	143319721	C	T	0.387878	-0.0089	0.0013	11.12	8.71495	0.05455	na	na	na	na	na	na	INPP4B	na	na	na	na	na	na	na	na	na	na	INPP4B
rs7696969	logTG	4	143326714	G	T	0.622825	-0.0113	0.0013	17.4496	14.8602	0.01307	na	INPP4B	na	na	na	na	INPP4B	na	na	na	na	na	na	na	na	na	INPP4B	na
rs2358183	logTG	4	148985862	C	T	0.748577	0.0104	0.0014	12.9595	8.73184	0.1032	na	na	na	na	na	na	ARHGAP10	ARHGAP10	na	na	na	ARHGAP10	na	na	na	na	ARHGAP10	na
rs2290846	HDL	4	151199080	G	A	0.746764	0.0102	0.0014	12.4949	8.02815	0.9562	na	na	na	LRBA	na	na	LRBA	LRBA	LRBA	LRBA	na	LRBA	na	na	LRBA	na	na	na
rs2290846	TC	4	151199080	G	A	0.745177	0.0097	0.0014	11.3715	8.39933	0.6577	na	na	na	LRBA;MAB21L2	na	LRBA	LRBA	LRBA	LRBA	LRBA	LRBA	LRBA	na	LRBA	na	na	na	MAB21L2
rs2085723	LDL	4	151206057	G	T	0.364879	-0.0077	0.0013	8.50035	8.3025	0.006571	na	DCLK2	na	LRBA	na	LRBA	LRBA	LRBA	LRBA	LRBA	LRBA	LRBA	na	LRBA	na	na	na	DCLK2
rs41280463	LDL	4	154191226	G	A	0.852687	0.0145	0.0018	15.1017	12.3307	0.3541	na	TRIM2	TRIM2	na	na	na	TRIM2	na	na	TLR2	na	na	na	na	na	na	TRIM2	na
rs41280463	nonHDL	4	154191226	G	A	0.850717	0.0175	0.0021	16.1046	13.1137	0.59	na	TRIM2	TRIM2	na	na	na	TRIM2	na	na	TLR2	na	na	na	na	na	na	TRIM2	na
rs41280463	TC	4	154191226	G	A	0.856378	0.019	0.0017	28.2744	23.7458	0.1923	na	TRIM2	TRIM2	MND1	MND1	TLR2	TRIM2	na	na	TLR2	na	na	na	na	na	na	TRIM2	MND1;TLR2
rs72729623	HDL	4	154208278	C	T	0.873215	0.017	0.0019	18.4388	14.1915	0.6123	na	na	na	na	na	na	TRIM2	na	na	TLR2	na	na	na	na	na	na	na	TRIM2
rs6054	LDL	4	155489608	C	T	0.995634	-0.1246	0.0108	30.0664	25.2343	0.9562	na	na	na	FGA	na	FGB	FGB	na	FGB	na	FGB	na	na	na	na	FGB	na	FGA
rs6054	logTG	4	155489608	C	T	0.995606	-0.116	0.0107	26.6581	22.3747	0.1474	na	na	na	na	na	FGB	FGB	na	FGB	na	FGB	na	na	na	na	FGB	na	na
rs6054	nonHDL	4	155489608	C	T	0.995008	-0.1585	0.012	39.1049	34.0759	0.7588	na	na	na	na	na	FGA	FGB	na	FGB	na	na	na	na	na	na	na	FGB	FGA
rs6054	TC	4	155489608	C	T	0.995623	-0.1438	0.0103	43.5702	36.2044	0.8042	na	na	na	FGA	na	FGB	FGB	na	FGB	na	FGB	na	na	na	na	FGB	na	FGA
rs11100083	HDL	4	157682598	C	T	0.273569	0.0176	0.0014	35.5183	27.8758	0.09474	na	na	na	na	na	na	PDGFC	PDGFC	na	na	na	PDGFC	na	na	na	na	PDGFC	na
rs13108763	logTG	4	157697086	G	A	0.359087	-0.0143	0.0013	27.4178	21.358	0.5813	na	na	na	PDGFC	PDGFC	na	PDGFC	PDGFC	na	na	na	PDGFC	na	na	na	PDGFC	na	na
rs72701754	LDL	4	185251995	T	A	0.411151	0.0082	0.0013	9.54787	7.57031	0.07545	na	AC099343.3;AC099343.2	AC099343.3;AC099343.2	RP11-326I11.3	RP11-326I11.3	IRF2	IRF2	na	CENPU;ACSL1;RP11-701P16.2;STOX2	na	IRF2	na	na	na	na	na	IRF2	AC099343.2;AC099343.3;ACSL1;CENPU;RP11-326I11.3;RP11-701P16.2;STOX2
rs72701754	TC	4	185251995	T	A	0.413054	0.0091	0.0012	13.4726	10.6477	0.0346	na	AC099343.2;AC099343.3	AC099343.2;AC099343.3	RP11-290F5.2;RP11-326I11.3	RP11-326I11.3	ACSL1	IRF2	na	na	na	na	na	na	na	na	na	na	AC099343.2;AC099343.3;ACSL1;IRF2;RP11-290F5.2;RP11-326I11.3
rs72707016	HDL	5	665148	G	A	0.170899	0.0112	0.0017	10.3516	7.55277	0.1471	na	TPPP;CEP72;AC026740.1	CEP72	na	na	EXOC3	CEP72	na	AC026740.1;CEP72;TPPP	AHRR;SDHA;SLC9A3;TPPP;ZDHHC11;ZDHHC11B	na	na	na	na	na	CEP72	AC026740.1;TPPP	EXOC3
rs4449583	HDL	5	1284135	C	T	0.675238	0.0092	0.0014	10.3025	8.26512	0.1123	na	AC021087.1	AC021087.1	na	na	CLPTM1L	TERT	na	na	LPCAT1;ZDHHC11	na	na	na	na	na	na	na	AC021087.1;CLPTM1L;TERT
rs16868954	HDL	5	39451982	C	T	0.951786	-0.0274	0.003	19.1777	14.197	0.06271	na	na	na	CTD-2078B5.2	CTD-2078B5.2	RICTOR	DAB2	DAB2	na	na	na	DAB2	na	na	na	na	DAB2	CTD-2078B5.2;RICTOR
rs2221258	TC	5	39549119	G	A	0.638662	-0.0107	0.0013	15.7305	11.9017	0.9477	na	DAB2	DAB2	CTD-2078B5.2	CTD-2078B5.2	DAB2	DAB2	DAB2	na	na	DAB2	DAB2	na	na	DAB2	na	na	CTD-2078B5.2
rs115018790	nonHDL	5	52088271	G	A	0.964472	0.0394	0.0041	21.1383	17.0506	0.4741	na	PELO	PELO	PELO;ITGA1	PELO	ITGA1	ITGA1	PELO	na	ITGA2	ITGA1	PELO	na	na	na	ITGA1;PELO	na	na
rs116734477	LDL	5	52095024	C	T	0.964617	0.0518	0.0035	48.8342	42.7524	0.4029	na	PELO	PELO	PELO;ITGA1	PELO;ITGA1	na	ITGA1	na	na	ITGA2	na	na	na	na	na	na	ITGA1;PELO	na
rs116734477	TC	5	52095024	C	T	0.965881	0.0347	0.0034	23.729	18.9625	0.3134	na	PELO	PELO	PELO;ITGA1	PELO	na	ITGA1	PELO	na	ITGA2	na	PELO	na	na	na	PELO	ITGA1	na
rs6866562	HDL	5	52697383	G	A	0.45832	0.0097	0.0012	15.2005	10.632	0.363	na	PELO	PELO	ITGA1	ITGA1	ITGA1	FST	FST	na	ITGA2	ITGA1	FST	na	na	na	na	FST;ITGA1	PELO
rs1664781	HDL	5	53276301	G	A	0.288659	0.0127	0.0014	18.9301	17.0579	0.006975	na	FST	na	na	na	na	ARL15	na	na	HSPB3	na	na	na	na	na	na	na	ARL15;FST
rs79760705	nonHDL	5	53298716	G	T	0.899055	-0.0212	0.0025	16.6474	13.0571	0.08441	na	na	na	na	na	na	ARL15	na	na	HSPB3	na	na	na	na	na	na	na	ARL15
rs79760705	TC	5	53298716	G	T	0.90005	-0.0143	0.0021	11.0091	7.99895	0.3053	na	na	na	na	na	na	ARL15	na	na	HSPB3	na	na	na	na	na	na	na	ARL15
rs6889847	logTG	5	53303452	G	C	0.73124	-0.0173	0.0014	34.3509	29.1377	0.3666	na	na	na	na	na	na	ARL15	ARL15	na	HSPB3	na	ARL15	na	na	na	na	ARL15	na
rs465002	HDL	5	55808475	C	T	0.295052	0.0254	0.0014	72.835	66.2288	0.2149	na	SLC38A9	na	CTC-236F12.4	na	MAP3K1	AC022431.2	na	na	MAP3K1	na	na	na	na	na	na	na	AC022431.2;CTC-236F12.4;MAP3K1;SLC38A9
rs13173241	LDL	5	55861359	G	A	0.806895	-0.0151	0.0016	20.4182	17.9963	0.04973	na	na	na	CTC-236F12.4	na	na	AC022431.2	MAP3K1	na	MAP3K1	na	na	na	na	na	na	na	AC022431.2;CTC-236F12.4;MAP3K1
rs13173241	logTG	5	55861359	G	A	0.806913	-0.0353	0.0016	107.14	104.398	0.01469	na	na	na	CTC-236F12.4;C5orf67;MAP3K1;SETD9;MIER3	C5orf67;SETD9	MAP3K1	AC022431.2	MAP3K1	na	MAP3K1	MAP3K1	MAP3K1	na	na	na	MAP3K1	na	AC022431.2;C5orf67;CTC-236F12.4;MIER3;SETD9
rs13173241	nonHDL	5	55861359	G	A	0.813815	-0.0237	0.0019	34.9833	31.9609	0.05295	na	na	na	CTC-236F12.4	na	na	AC022431.2	MAP3K1	na	MAP3K1	na	na	na	na	na	na	na	AC022431.2;CTC-236F12.4;MAP3K1
rs13173241	TC	5	55861359	G	A	0.810309	-0.0146	0.0015	21.6628	17.689	0.081	na	na	na	CTC-236F12.4	na	na	AC022431.2	MAP3K1	na	MAP3K1	na	na	na	na	na	na	na	AC022431.2;CTC-236F12.4;MAP3K1
rs43217	nonHDL	5	57578037	G	A	0.691653	-0.0124	0.0016	14.0367	10.2052	0.2749	na	na	na	na	na	na	PLK2	na	na	na	na	na	na	na	na	na	na	PLK2
rs43217	TC	5	57578037	G	A	0.697594	-0.0091	0.0013	11.5918	7.68762	0.3158	na	na	na	na	na	na	PLK2	na	na	na	na	na	na	na	na	na	na	PLK2
rs151912	logTG	5	57607142	T	A	0.578634	-0.0117	0.0013	18.6464	15.1402	0.8304	na	na	na	PLK2	PLK2	na	PLK2	PLK2	na	na	na	PLK2	na	na	na	PLK2	na	na
rs4976033	HDL	5	67714246	G	A	0.426018	-0.0124	0.0013	20.8387	16.2055	0.2053	na	na	na	na	na	PIK3R1	PIK3R1	PIK3R1	na	PIK3R1	PIK3R1	PIK3R1	na	na	na	PIK3R1	na	na
rs4976033	logTG	5	67714246	G	A	0.425847	0.0165	0.0013	36.1855	31.0347	0.239	na	na	na	na	na	PIK3R1	PIK3R1	PIK3R1	na	PIK3R1	PIK3R1	PIK3R1	na	na	na	PIK3R1	na	na
rs3010278	TC	5	72013573	G	T	0.232079	-0.0163	0.0015	26.7795	22.4877	0.191	na	na	na	ZNF366;CTC-347C20.2;TNPO1;CTD-2376I4.1;CTD-2376I4.2;FCHO2;TMEM171	TNPO1;CTD-2376I4.1;CTD-2376I4.2;FCHO2	na	TNPO1	TNPO1	na	na	na	TNPO1	na	na	na	TNPO1	na	CTC-347C20.2;CTD-2376I4.1;CTD-2376I4.2;FCHO2;TMEM171;ZNF366
rs4704043	LDL	5	72159179	C	T	0.324897	-0.0159	0.0014	29.1653	24.4017	0.6492	na	na	na	ZNF366;CTC-347C20.2;TNPO1;CTD-2376I4.1;CTD-2376I4.2;FCHO2;TMEM171	TNPO1;CTD-2376I4.1;FCHO2	na	TNPO1	FCHO2	na	na	na	FCHO2	na	na	na	na	FCHO2;TNPO1	CTC-347C20.2;CTD-2376I4.1;CTD-2376I4.2;TMEM171;ZNF366
rs4704043	nonHDL	5	72159179	C	T	0.318856	-0.0174	0.0016	26.8191	21.6261	0.5777	na	na	na	ZNF366;CTC-347C20.2;TNPO1;CTD-2376I4.1;CTD-2376I4.2;FCHO2;TMEM171	TNPO1;CTD-2376I4.1;FCHO2	TNPO1	TNPO1	FCHO2;TNPO1	na	na	TNPO1	FCHO2;TNPO1	na	na	TNPO1	na	FCHO2	CTC-347C20.2;CTD-2376I4.1;CTD-2376I4.2;TMEM171;ZNF366
rs2544645	HDL	5	72919127	G	C	0.246509	-0.0132	0.0015	17.8639	13.8932	0.8396	na	ARHGEF28	ARHGEF28	TMEM171	na	na	ARHGEF28	UTP15	na	na	na	na	na	na	na	na	ARHGEF28	TMEM171;UTP15
rs12916	LDL	5	74656539	C	T	0.40334	0.0688	0.0013	610.019	601.851	5.21e-06	na	na	na	FAM169A;GCNT4;ANKRD31;HMGCR;COL4A3BP;CTD-2235C13.3;POLK;CTC-366B18.4;ANKDD1B;POC5	GCNT4;ANKRD31;HMGCR;COL4A3BP;CTD-2235C13.3;POLK;CTC-366B18.4;ANKDD1B;POC5	HMGCR	HMGCR	HMGCR	HMGCR	na	HMGCR	HMGCR	na	HMGCR	na	na	na	ANKDD1B;ANKRD31;COL4A3BP;CTC-366B18.4;CTD-2235C13.3;FAM169A;GCNT4;POC5;POLK
rs12916	nonHDL	5	74656539	C	T	0.41189	0.0667	0.0015	431.108	398.693	0.004971	na	POLK;HMGCR;COL4A3BP	POLK	GCNT4;ANKRD31;HMGCR;COL4A3BP;CTD-2235C13.3;POLK;CTC-366B18.4;ANKDD1B;POC5	GCNT4;ANKRD31;HMGCR;COL4A3BP;CTD-2235C13.3;POLK;CTC-366B18.4;ANKDD1B;POC5	na	HMGCR	HMGCR;COL4A3BP	HMGCR	na	na	HMGCR;COL4A3BP	na	HMGCR	na	COL4A3BP	POLK	ANKDD1B;ANKRD31;CTC-366B18.4;CTD-2235C13.3;GCNT4;POC5
rs12916	TC	5	74656539	C	T	0.402968	0.0643	0.0012	625.295	545.65	5.77e-07	na	COL4A3BP;HMGCR	na	FAM169A;GCNT4;ANKRD31;HMGCR;COL4A3BP;CTD-2235C13.3;POLK;CTC-366B18.4;ANKDD1B;POC5	GCNT4;ANKRD31;HMGCR;COL4A3BP;CTD-2235C13.3;POLK;CTC-366B18.4;ANKDD1B;POC5	HMGCR	HMGCR	HMGCR;COL4A3BP;POLK	na	na	HMGCR	HMGCR;COL4A3BP;POLK	na	HMGCR	na	COL4A3BP	POLK	ANKDD1B;ANKRD31;CTC-366B18.4;CTD-2235C13.3;FAM169A;GCNT4;POC5
rs2307111	HDL	5	75003678	C	T	0.439532	0.0161	0.0013	34.4995	28.9517	0.1937	na	AC010245.2	na	ANKRD31;HMGCR;COL4A3BP;CTD-2235C13.3;POLK;CTC-366B18.4;ANKDD1B;POC5;SV2C	ANKRD31;HMGCR;COL4A3BP;CTD-2235C13.3;POLK;CTC-366B18.4;ANKDD1B;POC5	na	POC5	na	RNU6-680P;POC5	na	na	na	na	na	na	POC5	na	AC010245.2;ANKDD1B;ANKRD31;COL4A3BP;CTC-366B18.4;CTD-2235C13.3;HMGCR;POLK;RNU6-680P;SV2C
rs9293683	HDL	5	75700310	C	T	0.303446	-0.0106	0.0014	13.4328	10.339	0.1859	na	IQGAP2	na	SV2C	na	na	IQGAP2	IQGAP2	na	na	na	IQGAP2	na	na	na	IQGAP2	na	SV2C
rs10052346	logTG	5	78472599	G	T	0.577071	0.0096	0.0013	12.8156	11.3474	0.06632	na	BHMT;JMY;DMGDH	na	DMGDH;BHMT;JMY	DMGDH;JMY	JMY	DMGDH	na	JMY	BHMT	JMY	na	na	na	JMY	DMGDH	BHMT	na
rs7733997	HDL	5	78543716	G	T	0.379632	0.0081	0.0013	9.33334	8.30745	0.07115	na	DMGDH;JMY	JMY	na	na	na	JMY	DMGDH;BHMT	DMGDH;JMY	BHMT	na	DMGDH	na	na	na	DMGDH;JMY	na	BHMT
rs115912456	HDL	5	82815158	G	A	0.0390388	0.0273	0.0033	15.883	12.8891	0.06169	na	na	na	na	na	na	VCAN	VCAN	VCAN	TMEM167A	na	VCAN	na	na	na	VCAN	na	na
rs115912456	logTG	5	82815158	G	A	0.0389164	-0.0261	0.0033	14.5862	11.7003	0.0755	na	na	na	na	na	na	VCAN	VCAN	VCAN	TMEM167A	na	VCAN	na	na	na	VCAN	na	na
rs7704653	logTG	5	90255685	G	A	0.722632	0.0102	0.0014	12.4949	8.6335	0.5458	na	na	na	na	na	ARRDC3	GPR98	na	na	ARRDC3	na	na	na	na	na	na	na	ARRDC3;GPR98
rs25863	HDL	5	96105926	G	A	0.578657	-0.0081	0.0013	9.33334	7.67543	0.07753	na	CAST	na	ERAP2;LNPEP	ERAP2	na	CAST	CAST;ERAP1	na	LNPEP	na	CAST	na	na	na	CAST	na	ERAP1;ERAP2;LNPEP
rs172305	logTG	5	107316915	G	A	0.676848	0.008	0.0013	9.12133	7.30964	0.04959	na	na	na	na	na	na	FBXL17	FBXL17	na	na	na	FBXL17	na	na	na	na	FBXL17	na
rs33568	logTG	5	112304202	G	T	0.514272	0.0087	0.0013	10.6582	8.0502	0.2269	na	MCC	na	DCP2;MCC	DCP2;MCC	APC	DCP2	MCC;DCP2	MCC	APC	na	MCC;DCP2	na	na	MCC	DCP2	na	APC
rs7732198	HDL	5	112379659	C	T	0.445736	-0.0094	0.0013	12.3185	8.72181	0.8961	na	MCC;DCP2	MCC	na	na	APC	MCC	DCP2;MCC	MCC	APC	na	DCP2;MCC	na	na	MCC	na	DCP2	APC
rs1045242	HDL	5	118729327	G	A	0.275066	0.0159	0.0014	29.1653	24.7967	0.7694	na	DMXL1;TNFAIP8	DMXL1;TNFAIP8	na	na	HSD17B4	TNFAIP8	TNFAIP8	na	HSD17B4	na	TNFAIP8	na	na	na	TNFAIP8	na	DMXL1;HSD17B4
rs1045242	logTG	5	118729327	G	A	0.275212	-0.0186	0.0014	39.5526	34.0556	0.09587	na	TNFAIP8;DMXL1	DMXL1;TNFAIP8	TNFAIP8;HSD17B4;FAM170A	TNFAIP8;HSD17B4;FAM170A	HSD17B4	TNFAIP8	na	na	HSD17B4	HSD17B4	na	na	na	na	TNFAIP8	HSD17B4	DMXL1;FAM170A
rs6869704	LDL	5	122833667	C	T	0.457352	-0.0161	0.0013	34.4995	31.5395	0.7941	na	CSNK1G3	CSNK1G3	CSNK1G3	CSNK1G3	na	CSNK1G3	na	na	na	na	na	na	na	na	CSNK1G3	na	na
rs6869704	nonHDL	5	122833667	C	T	0.473174	-0.0144	0.0015	21.0972	19.3693	0.05201	na	CSNK1G3	na	CSNK1G3	CSNK1G3	na	CSNK1G3	na	na	na	na	na	na	na	na	CSNK1G3	na	na
rs6869704	TC	5	122833667	C	T	0.465315	-0.0139	0.0012	30.3005	25.1347	0.5719	na	CSNK1G3	CSNK1G3	CSNK1G3	CSNK1G3	na	CSNK1G3	CEP120	na	na	na	na	na	na	na	CSNK1G3	na	CEP120
rs17764730	HDL	5	127357526	C	T	0.772591	-0.0123	0.0015	15.6191	11.8825	0.05167	na	LINC01184	LINC01184	na	na	na	SLC12A2	na	na	na	na	na	na	na	na	na	na	LINC01184;SLC12A2
rs7734927	logTG	5	127453735	T	A	0.228582	-0.0108	0.0015	12.2203	8.53851	0.6752	na	LINC01184	LINC01184	LINC01184;SLC12A2	LINC01184	SLC12A2	SLC12A2	na	na	na	SLC12A2	na	na	na	na	SLC12A2	LINC01184	na
rs10478901	HDL	5	129196638	T	A	0.358848	0.0083	0.0013	9.7649	8.47167	0.008816	na	CHSY3	na	na	na	na	CHSY3	na	na	na	na	na	na	na	na	na	CHSY3	na
rs26008	HDL	5	131008194	C	T	0.922693	0.0182	0.0023	14.6	10.3054	0.5587	na	RAPGEF6	na	na	na	FNIP1	CTC-432M15.3	FNIP1;RAPGEF6	CTC-432M15.3;FNIP1	ACSL6;CSF2	FNIP1	RAPGEF6;FNIP1	na	na	na	FNIP1	CTC-432M15.3;RAPGEF6	na
rs26008	logTG	5	131008194	C	T	0.922517	-0.0236	0.0023	23.9757	18.3904	0.2682	na	RAPGEF6	na	FNIP1;MEIKIN	FNIP1;MEIKIN	FNIP1	CTC-432M15.3	FNIP1;RAPGEF6	CTC-432M15.3;FNIP1	ACSL6;CSF2	FNIP1	FNIP1;RAPGEF6	na	na	FNIP1	na	CTC-432M15.3;RAPGEF6	MEIKIN
rs7730247	nonHDL	5	131781288	C	A	0.22165	-0.0154	0.0018	16.9307	13.8078	0.2397	na	C5orf56;HSPA4;IRF1;SLC22A5	na	P4HA2;SLC22A4;C5orf56;IRF1	P4HA2	IRF1	C5orf56	SLC22A4	AC116366.6;C5orf56;Y_RNA	ACSL6;CSF2;IL13	IRF1	SLC22A4	na	na	C5orf56	IRF1	SLC22A4	AC116366.6;HSPA4;P4HA2;SLC22A5;Y_RNA
rs6894249	TC	5	131797547	G	A	0.423146	0.0131	0.0012	27.0179	21.4769	0.2426	na	SLC22A4	na	ACSL6;P4HA2;SLC22A4;SLC22A5;C5orf56;IRF1;RAD50;IL13	P4HA2;C5orf56;IRF1;RAD50	IRF1	C5orf56	IRF1	na	ACSL6;CSF2;IL13	IRF1	IRF1	na	na	na	IRF1	C5orf56;SLC22A4	ACSL6;IL13;P4HA2;RAD50;SLC22A5
rs2057655	LDL	5	131807624	G	A	0.779857	0.0183	0.0015	33.5075	28.0078	0.3582	na	IRF1;C5orf56	na	P4HA2;SLC22A4;SLC22A5;C5orf56;IRF1;RAD50;IL13	P4HA2;C5orf56;IRF1;RAD50	IRF1	C5orf56	SLC22A4	AC116366.6;C5orf56;Y_RNA	ACSL6;CSF2;IL13	IRF1	SLC22A4	na	na	C5orf56	IRF1	SLC22A4	AC116366.6;IL13;P4HA2;RAD50;SLC22A5;Y_RNA
rs72801474	HDL	5	132444128	G	A	0.91213	-0.0255	0.0024	25.642	20.8269	0.6332	na	HSPA4	HSPA4	RAD50;IL13	RAD50	AFF4	HSPA4	HSPA4	na	IL13	na	HSPA4	na	na	na	HSPA4	na	AFF4;IL13;RAD50
rs72801474	logTG	5	132444128	G	A	0.912528	0.0301	0.0023	38.4079	31.2186	0.4064	na	HSPA4	HSPA4	SEPT8;SOWAHA;AC004775.5;SHROOM1;GDF9;LEAP2;AFF4;HSPA4	SHROOM1;AFF4;HSPA4	AFF4	HSPA4	HSPA4	na	IL13	AFF4	HSPA4	na	na	HSPA4	na	AFF4	AC004775.5;GDF9;LEAP2;SEPT8;SHROOM1;SOWAHA
rs2108665	logTG	5	134136333	C	T	0.879182	-0.0138	0.0019	12.4223	8.00642	0.08094	SAR1B	CAMLG;SAR1B	SAR1B;CAMLG	AC005355.2;JADE2;SAR1B;SEC24A;CAMLG;DDX46;C5orf24;TXNDC15	AC005355.2;SAR1B;CAMLG;C5orf24	SEC24A	DDX46	SEC24A;SAR1B;PHF15;C5orf24;DDX46	CAMLG	SAR1B;SEC24A	SEC24A	SEC24A;SAR1B;C5orf24;DDX46	na	na	na	CAMLG;DDX46;SAR1B;SEC24A	C5orf24	AC005355.2;JADE2;PHF15;TXNDC15
rs254559	HDL	5	134444982	C	A	0.623861	0.0104	0.0013	14.9051	10.744	0.5257	SAR1B	AC109454.4	AC109454.4	na	na	SEC24A	C5orf66	na	na	CXCL14;SAR1B;SEC24A	na	na	na	na	na	na	na	AC109454.4;C5orf66;SEC24A
rs13179861	LDL	5	139527721	G	A	0.818084	0.011	0.0016	11.2077	8.56885	0.04087	na	PFDN1;CYSTM1	na	CYSTM1;PFDN1;ANKHD1;TMCO6	CYSTM1;PFDN1;ANKHD1	CXXC5	IGIP	na	na	SRA1	na	na	na	na	na	na	CYSTM1;PFDN1	ANKHD1;CXXC5;IGIP;TMCO6
rs60714373	TC	5	139651321	C	T	0.212618	-0.0129	0.0014	19.504	13.3693	0.6583	na	PFDN1;CYSTM1;AC011379.1	PFDN1	CYSTM1;PFDN1;HBEGF;SLC4A9;ANKHD1;EIF4EBP3;SLC35A4;TMCO6	CYSTM1;PFDN1;ANKHD1;TMCO6	ANKHD1	CYSTM1	na	na	SRA1	ANKHD1	na	na	na	na	CYSTM1	ANKHD1;PFDN1	AC011379.1;EIF4EBP3;HBEGF;SLC35A4;SLC4A9;TMCO6
rs12187444	nonHDL	5	139664820	C	T	0.209015	-0.0131	0.0018	12.4693	9.51453	0.4453	na	PFDN1;CYSTM1	PFDN1	CYSTM1;PFDN1;HBEGF;SLC4A9;ANKHD1;EIF4EBP3;SLC35A4;TMCO6	CYSTM1;PFDN1;ANKHD1;TMCO6	DND1	PFDN1	na	na	SRA1	na	na	na	na	na	PFDN1	CYSTM1	ANKHD1;DND1;EIF4EBP3;HBEGF;SLC35A4;SLC4A9;TMCO6
rs60987104	logTG	5	140063891	AAAAC	A	0.767933	0.0111	0.0016	11.3989	9.91567	0.9837	na	TMCO6;WDR55;ZMAT2	TMCO6;WDR55	SLC4A9;ANKHD1;EIF4EBP3;SLC35A4;CD14;CD14;TMCO6;IK;WDR55;HARS;ZMAT2	ANKHD1;CD14;TMCO6;WDR55	CD14	HARS	CD14;ANKHD1;SLC35A4;SLC4A9	DND1;HARS;WDR55;VTRNA1-2	SRA1	CD14	CD14;ANKHD1;SLC35A4;SLC4A9	na	na	CD14	HARS;WDR55	ANKHD1;SLC35A4;SLC4A9;TMCO6;ZMAT2	DND1;EIF4EBP3;IK;VTRNA1-2
rs137859889	HDL	5	141542219	GA	G	0.29919	0.0096	0.0015	9.80861	11.4755	8.04e-07	na	AC091825.1;NDFIP1	NDFIP1	na	na	PCDH1	NDFIP1	na	na	na	na	na	na	na	na	na	NDFIP1	AC091825.1;PCDH1
rs12523418	logTG	5	141707225	G	A	0.322719	-0.0093	0.0014	10.5119	7.96815	0.5043	na	na	na	FGF1	FGF1	SPRY4	SPRY4	na	na	na	SPRY4	na	na	na	na	na	SPRY4	FGF1
rs11167778	LDL	5	141888881	C	T	0.896008	-0.0191	0.0021	19.0251	18.0066	0.0004891	na	na	na	na	na	na	FGF1	na	na	na	na	na	na	na	na	na	na	FGF1
rs11167778	TC	5	141888881	C	T	0.895966	-0.0136	0.002	10.9804	9.96521	0.0008525	na	na	na	na	na	na	FGF1	na	na	na	na	na	na	na	na	na	na	FGF1
rs10077941	nonHDL	5	141911176	G	A	0.874896	-0.0142	0.0022	9.96439	9.87486	0.0003554	na	na	na	na	na	na	FGF1	na	na	na	na	na	na	na	na	na	na	FGF1
rs35553545	HDL	5	148844793	G	T	0.762455	0.0098	0.0015	10.1916	8.2762	0.01421	na	CSNK1A1	CSNK1A1	na	na	PPARGC1B	CSNK1A1	na	na	PPARGC1B;SH3TC2	na	na	na	na	na	na	CSNK1A1	PPARGC1B
rs245078	logTG	5	149353598	G	A	0.433633	-0.0079	0.0013	8.91183	8.16315	0.01594	na	TIGD6	TIGD6	SLC26A2;TIGD6;HMGXB3	SLC26A2;TIGD6;HMGXB3	CD74	SLC26A2	SLC26A2;HMGXB3	na	PPARGC1B	na	SLC26A2;HMGXB3	na	na	na	SLC26A2	HMGXB3;TIGD6	CD74
rs216140	nonHDL	5	149443298	C	T	0.297183	-0.0115	0.0017	10.8743	8.58582	0.2562	na	HMGXB3;CSF1R;IRGM;TIGD6	HMGXB3;CSF1R	TIGD6;HMGXB3;CSF1R	HMGXB3	CD74	CSF1R	SLC26A2;HMGXB3	PPARGC1B	PPARGC1B	na	HMGXB3	na	na	na	CSF1R;HMGXB3	TIGD6	CD74;IRGM;PPARGC1B;SLC26A2
rs1438588	HDL	5	153444950	G	A	0.656914	-0.011	0.0013	16.5786	11.9894	0.6897	na	FAM114A2	na	na	na	na	MFAP3	MFAP3	FAM114A2	na	na	MFAP3	na	na	na	na	FAM114A2;MFAP3	na
rs185653065	nonHDL	5	155581796	G	A	0.00121564	0.1702	0.0281	8.85781	9.43306	1	na	HAVCR1	na	SGCD	na	na	SGCD	na	na	na	na	na	na	na	na	na	SGCD	HAVCR1
rs6874202	LDL	5	156391628	C	T	0.626736	0.0361	0.0013	168.991	155.107	0.004123	na	TIMD4	na	TIMD4;HAVCR1;HAVCR2;MED7;ITK;CYFIP2	TIMD4;HAVCR1;HAVCR2;MED7;ITK;CYFIP2	ADAM19	TIMD4	TIMD4	TIMD4	NIPAL4	na	TIMD4	na	TIMD4	na	na	na	ADAM19;CYFIP2;HAVCR1;HAVCR2;ITK;MED7
rs6874202	logTG	5	156391628	C	T	0.627124	0.0342	0.0013	151.805	140.412	8.94e-05	na	TIMD4	na	TIMD4;HAVCR1;HAVCR2;MED7;ITK	TIMD4;HAVCR1;HAVCR2	ADAM19	TIMD4	TIMD4	TIMD4	NIPAL4	na	TIMD4	na	TIMD4	na	na	na	ADAM19;HAVCR1;HAVCR2;ITK;MED7
rs6874202	nonHDL	5	156391628	C	T	0.644701	0.0463	0.0015	208.475	183.164	0.0003298	na	TIMD4	na	SGCD;TIMD4;HAVCR1;HAVCR2;MED7;ITK;ADAM19	TIMD4;HAVCR1;HAVCR2;MED7	TIMD4	TIMD4	TIMD4	TIMD4	NIPAL4	TIMD4	TIMD4	TIMD4	na	na	na	na	ADAM19;HAVCR1;HAVCR2;ITK;MED7;SGCD
rs6874202	TC	5	156391628	C	T	0.634346	0.0438	0.0012	290.955	246.296	5.24e-05	na	TIMD4	na	SGCD;TIMD4;HAVCR1;HAVCR2;MED7;ITK;ADAM19	TIMD4;HAVCR1;HAVCR2;MED7;ITK	na	TIMD4	TIMD4	TIMD4	NIPAL4	na	TIMD4	na	TIMD4	na	na	na	ADAM19;HAVCR1;HAVCR2;ITK;MED7;SGCD
rs2914231	logTG	5	158011435	G	C	0.738527	-0.0216	0.0014	52.9781	42.7002	0.8608	na	na	na	RP11-32D16.1	RP11-32D16.1	EBF1	EBF1	na	na	na	EBF1	na	na	na	na	na	EBF1	RP11-32D16.1
rs1651274	HDL	5	158020425	G	A	0.259578	-0.0188	0.0014	40.3859	33.3605	0.1005	na	LINC02202	na	na	na	EBF1	EBF1	na	na	na	EBF1	na	na	na	na	na	EBF1	LINC02202
rs55801554	HDL	5	158622532	C	A	0.734339	-0.0111	0.0014	14.6543	10.369	0.2411	na	na	na	na	na	EBF1	RNF145	RNF145	na	na	na	RNF145	na	na	na	na	RNF145	EBF1
rs2339234	HDL	5	170612546	G	A	0.2953	0.0105	0.0014	13.1951	9.50855	0.732	na	na	na	na	na	na	RANBP17	na	na	na	na	na	na	na	na	na	na	RANBP17
rs8543	HDL	5	172591337	G	T	0.115493	0.0127	0.002	9.66693	8.14256	0.05358	na	BNIP1;CREBRF;RPL26L1	BNIP1;CREBRF	na	na	ERGIC1	BNIP1	C5orf41;ATP6V0E1	na	DUSP1	na	na	na	na	na	na	BNIP1	ATP6V0E1;C5orf41;CREBRF;ERGIC1;RPL26L1
rs72812818	HDL	5	173356752	G	C	0.726222	0.0108	0.0014	13.9148	9.46148	0.6791	na	NSG2;CPEB4;C5orf47	NSG2	na	na	CPEB4	CPEB4	CPEB4	na	CPEB4	CPEB4	CPEB4	na	na	CPEB4	na	na	C5orf47;NSG2
rs72812818	logTG	5	173356752	G	C	0.722119	-0.0097	0.0014	11.3715	8.7966	0.1909	na	NSG2;CPEB4;C5orf47	NSG2	CPEB4;C5orf47	na	CPEB4	CPEB4	CPEB4	na	CPEB4	CPEB4	CPEB4	na	CPEB4	na	na	C5orf47	NSG2
rs31778	LDL	5	176522036	C	T	0.701601	0.0096	0.0014	11.1533	7.94421	0.4413	na	FGFR4	FGFR4	FGFR4	FGFR4	FGFR4	FGFR4	FGFR4	FGFR4;DBN1	DBN1	FGFR4	FGFR4	FGFR4	na	na	na	na	DBN1
rs78523677	HDL	5	176551103	C	A	0.823003	-0.0163	0.0017	21.0477	16.3472	0.3727	na	na	na	FGFR4	FGFR4	NSD1	NSD1	NSD1	NSD1	DBN1	NSD1	NSD1	na	na	NSD1	na	na	FGFR4
rs4976677	logTG	5	176629546	G	A	0.218588	0.015	0.0016	20.16	17.5206	0.3602	na	LMAN2;NSD1	LMAN2	NSD1;RAB24;MXD3;PRELID1;LMAN2;RGS14;SLC34A1;PFN3;F12;GRK6	NSD1;MXD3;PRELID1;LMAN2;RGS14;PFN3;F12	LMAN2	NSD1	NSD1;LMAN2	na	DBN1	LMAN2	NSD1;LMAN2	na	na	LMAN2;NSD1	na	na	F12;GRK6;MXD3;PFN3;PRELID1;RAB24;RGS14;SLC34A1
rs188238483	TC	5	180308441	C	T	0.00945276	-0.0422	0.0074	7.9284	8.47041	0.00575	na	na	na	na	na	MGAT1	BTNL8	na	BTNL9	na	na	na	na	na	na	na	na	BTNL8;BTNL9;MGAT1
rs138692142	HDL	5	180349778	C	T	0.990754	0.0724	0.0077	20.2738	16.0918	0.1058	na	na	na	na	na	MGAT1	BTNL8	na	BTNL9	na	na	na	na	na	na	na	na	BTNL8;BTNL9;MGAT1
rs35742417	logTG	6	7247344	C	A	0.827482	0.0116	0.0017	11.0514	7.95562	0.7049	na	na	na	na	na	SSR1	RREB1	RREB1	RREB1	na	na	RREB1	na	na	na	RREB1	na	SSR1
rs113251986	LDL	6	11842824	G	A	0.914867	0.0206	0.0024	17.0354	13.7295	0.3222	na	AL022724.1;ADTRP	AL022724.1;ADTRP	ADTRP;RP3-413H6.2	ADTRP;RP3-413H6.2	NEDD9	ADTRP	na	na	na	na	na	na	na	na	ADTRP	na	AL022724.1;NEDD9;RP3-413H6.2
rs34451811	nonHDL	6	11865597	C	T	0.0817611	-0.0236	0.0029	15.3957	13.1561	0.1854	na	na	na	ADTRP;RP3-413H6.2	ADTRP;RP3-413H6.2	na	ADTRP	ADTRP	na	na	na	na	na	na	na	ADTRP	na	RP3-413H6.2
rs4713979	TC	6	11868682	C	T	0.758477	-0.0131	0.0015	17.6068	17.2051	0.0004936	na	na	na	ADTRP;RP3-413H6.2	ADTRP;RP3-413H6.2	na	ADTRP	ADTRP	na	na	na	na	na	na	na	ADTRP	na	RP3-413H6.2
rs7746081	LDL	6	16126934	G	A	0.625292	0.0295	0.0013	113.273	98.3678	0.005178	na	na	na	MYLIP;GMPR	MYLIP	MYLIP	MYLIP	na	na	na	MYLIP	na	na	na	na	MYLIP	na	GMPR
rs2235215	nonHDL	6	16131156	C	T	0.380552	-0.0295	0.0016	75.1824	67.8018	0.1042	na	na	na	MYLIP;GMPR	MYLIP	MYLIP	MYLIP	na	na	na	MYLIP	na	na	na	na	MYLIP	na	GMPR
rs2235215	TC	6	16131156	C	T	0.39064	-0.0259	0.0013	87.5905	78.0643	0.1142	na	na	na	DTNBP1;MYLIP	MYLIP	MYLIP	MYLIP	MYLIP	na	na	MYLIP	MYLIP	na	na	MYLIP	na	na	DTNBP1
rs1262925	HDL	6	16810627	G	T	0.649273	-0.0116	0.0014	15.9303	12.326	0.859	na	na	na	na	na	ATXN1	ATXN1	na	na	na	ATXN1	na	na	na	na	na	ATXN1	na
rs6924805	logTG	6	18747705	G	T	0.38807	0.0091	0.0013	11.5918	9.36434	0.06543	na	na	na	RNF144B	na	na	RNF144B	RNF144B	na	na	na	RNF144B	na	na	na	RNF144B	na	na
rs6924805	nonHDL	6	18747705	G	T	0.38347	0.012	0.0015	14.9051	10.9068	0.6747	na	na	na	na	na	na	RNF144B	na	RNF144B	na	na	na	na	na	na	na	RNF144B	na
rs6924805	TC	6	18747705	G	T	0.381117	0.01	0.0012	16.1046	10.9015	0.5505	na	na	na	na	na	na	RNF144B	RNF144B	RNF144B	na	na	RNF144B	na	na	na	RNF144B	na	na
rs12189754	LDL	6	18757805	C	T	0.665121	-0.0098	0.0014	11.5918	8.3222	0.4645	na	na	na	na	na	na	RNF144B	na	RNF144B	na	na	na	na	na	na	na	RNF144B	na
rs9368188	LDL	6	20413721	G	A	0.672769	0.0093	0.0013	12.0738	8.90048	0.2448	na	na	na	E2F3	na	na	E2F3	na	na	CDKAL1	na	na	na	na	na	na	E2F3	na
rs9368188	nonHDL	6	20413721	G	A	0.665001	0.0121	0.0015	15.1412	12.091	0.05344	na	na	na	E2F3	na	na	E2F3	na	na	CDKAL1	na	na	na	na	na	na	E2F3	na
rs9368188	TC	6	20413721	G	A	0.671494	0.012	0.0013	19.5707	17.0347	0.05578	na	na	na	E2F3	na	na	E2F3	na	na	CDKAL1	na	na	na	na	na	na	E2F3	na
rs7748382	logTG	6	20665549	G	A	0.659955	-0.011	0.0013	16.5786	11.963	0.7278	na	na	na	E2F3;CDKAL1	na	na	CDKAL1	CDKAL1	na	CDKAL1	na	CDKAL1	na	na	na	CDKAL1	na	E2F3
rs9466056	LDL	6	21384613	G	A	0.622429	0.0094	0.0013	12.3185	8.57214	0.8608	na	na	na	na	na	na	CDKAL1	na	na	CDKAL1	na	na	na	na	na	na	na	CDKAL1
rs4710973	TC	6	21385702	C	T	0.633378	0.0089	0.0012	12.9204	8.26958	0.8905	na	na	na	na	na	na	CDKAL1	SOX4	na	CDKAL1	na	na	na	na	na	na	na	CDKAL1;SOX4
rs10946458	nonHDL	6	21391282	C	T	0.329217	-0.011	0.0016	11.2077	7.66394	0.7373	na	na	na	na	na	na	CDKAL1	SOX4	na	CDKAL1	na	na	na	na	na	na	na	CDKAL1;SOX4
rs113760175	LDL	6	22343592	G	A	0.937879	0.021	0.0028	13.1951	10.0658	0.5682	na	na	na	na	na	na	PRL	PRL	na	na	na	PRL	na	na	na	na	PRL	na
rs113760175	TC	6	22343592	G	A	0.937752	0.0227	0.0027	16.3776	13.0465	0.5796	na	na	na	na	na	na	PRL	na	na	na	na	na	na	na	na	na	na	PRL
rs181058325	LDL	6	25314597	G	A	0.060249	-0.0269	0.0028	21.1273	17.4222	0.5889	na	na	na	HIST1H2BA;SLC17A4	SLC17A4	na	LRRC16A	na	na	na	na	na	na	na	na	na	na	HIST1H2BA;LRRC16A;SLC17A4
rs181058325	nonHDL	6	25314597	G	A	0.0639261	-0.0226	0.0032	11.7864	9.04494	0.1187	na	na	na	HIST1H2BA;SLC17A4	SLC17A4	na	LRRC16A	na	na	na	na	na	na	na	na	na	na	HIST1H2BA;LRRC16A;SLC17A4
rs181058325	TC	6	25314597	G	A	0.0606105	-0.0237	0.0027	17.778	14.1009	0.3809	na	na	na	HIST1H2BA;SLC17A4	SLC17A4	na	LRRC16A	na	na	na	na	na	na	na	na	na	na	HIST1H2BA;LRRC16A;SLC17A4
rs80215559	LDL	6	25918225	C	T	0.0599027	-0.058	0.0028	94.5892	88.9972	0.6113	na	na	na	HIST1H2BA;SLC17A4;SLC17A2;TRIM38;U91328.19;U91328.22;HIST1H3A;HIST1H1C;HFE;HIST1H1T;HIST1H2BC;HIST1H2AC;HIST1H2BD;HIST1H2BE;HIST1H4E;HIST1H4H	SLC17A4;TRIM38;U91328.19;U91328.22;HIST1H3A;HIST1H1C;HFE;HIST1H1T;HIST1H2BC;HIST1H2AC;HIST1H4E	HIST1H4A	SLC17A2	na	HFE	HFE	na	na	na	na	na	na	HFE;SLC17A2	HIST1H1C;HIST1H1T;HIST1H2AC;HIST1H2BA;HIST1H2BC;HIST1H2BD;HIST1H2BE;HIST1H3A;HIST1H4A;HIST1H4E;HIST1H4H;SLC17A4;TRIM38;U91328.19;U91328.22
rs80215559	nonHDL	6	25918225	C	T	0.0625926	-0.0508	0.0033	52.7453	47.6588	0.9387	na	na	na	HIST1H2BA;SLC17A4;TRIM38;U91328.19;U91328.22;HIST1H3A;HIST1H1C;HFE;HIST1H2BC;HIST1H2AC;HIST1H2BD;HIST1H2BE	SLC17A4;TRIM38;U91328.19;U91328.22;HIST1H3A;HIST1H1C;HFE;HIST1H2BC	HIST1H4A	SLC17A2	na	HFE	HFE	na	na	na	na	na	na	HFE	HIST1H1C;HIST1H2AC;HIST1H2BA;HIST1H2BC;HIST1H2BD;HIST1H2BE;HIST1H3A;HIST1H4A;SLC17A2;SLC17A4;TRIM38;U91328.19;U91328.22
rs80215559	TC	6	25918225	C	T	0.0600298	-0.0505	0.0027	77.3355	69.8994	0.7772	na	na	na	HIST1H2BA;SLC17A4;TRIM38;U91328.19;U91328.22;HIST1H3A;HIST1H1C;HFE;HIST1H1T;HIST1H2BC;HIST1H2AC;HIST1H2BD;HIST1H2BE;HIST1H4E;HIST1H3G;HIST1H4H	SLC17A4;TRIM38;U91328.19;U91328.22;HIST1H3A;HIST1H1C;HFE;HIST1H1T;HIST1H2BC;HIST1H4E;HIST1H3G;HIST1H4H	HIST1H4A	SLC17A2	na	HFE;HIST1H1A	HFE	na	na	na	na	na	na	HFE	HIST1H1A;HIST1H1C;HIST1H1T;HIST1H2AC;HIST1H2BA;HIST1H2BC;HIST1H2BD;HIST1H2BE;HIST1H3A;HIST1H3G;HIST1H4A;HIST1H4E;HIST1H4H;SLC17A2;SLC17A4;TRIM38;U91328.19;U91328.22
rs9379828	logTG	6	26167951	G	C	0.335715	-0.0076	0.0013	8.29837	8.45909	0.0006496	na	AL353759.1;HIST1H2BD	HIST1H2BD	HFE;HIST1H2BD	HFE;HIST1H2BD	HIST1H2BD	HIST1H2BD	na	BTN3A1;BTN2A1;BTN1A1	HFE	HIST1H2BD	na	na	na	HIST1H2BD	na	na	AL353759.1;BTN1A1;BTN2A1;BTN3A1;HFE
rs806794	HDL	6	26200677	G	A	0.338489	0.0098	0.0013	13.3228	8.90824	0.3453	na	na	na	HIST1H2BA;SLC17A4;SLC17A2;TRIM38;U91328.19;U91328.22;HIST1H3A;HIST1H1C;HFE;HIST1H1T;HIST1H2BF;HIST1H2AC;HIST1H2BF;HIST1H2BF;HIST1H4E;HIST1H4H;BTN3A3;BTN1A1;HCG11	SLC17A4;TRIM38;U91328.19;U91328.22;HIST1H3A;HIST1H1C;HFE;HIST1H1T;HIST1H2BF;HIST1H2AC;HIST1H4E;BTN3A3;BTN1A1	HIST1H2BF	HIST1H2BF	na	HIST1H2BF;HIST1H4D	HFE	HIST1H2BD	na	HIST1H2BF	na	na	na	na	BTN1A1;BTN3A3;HCG11;HFE;HIST1H1C;HIST1H1T;HIST1H2AC;HIST1H2BA;HIST1H3A;HIST1H4D;HIST1H4E;HIST1H4H;SLC17A2;SLC17A4;TRIM38;U91328.19;U91328.22
rs35657082	LDL	6	27067657	T	A	0.0714252	-0.0325	0.0026	35.127	29.3589	0.6968	na	na	na	HIST1H2BJ	HIST1H2BJ	HIST1H2BK	HIST1H2BJ	na	na	na	na	na	na	na	na	na	HIST1H2BJ	HIST1H2BK
rs35657082	nonHDL	6	27067657	T	A	0.0751496	-0.026	0.0032	15.3493	12.2448	0.9681	na	na	na	na	na	na	HIST1H2BJ	na	na	na	na	na	na	na	na	na	na	HIST1H2BJ
rs35657082	TC	6	27067657	T	A	0.071531	-0.0293	0.0026	28.73	24.2189	0.9567	na	na	na	HIST1H2BJ;PRSS16	HIST1H2BJ	HIST1H2BK	HIST1H2BJ	na	na	na	na	na	na	na	na	na	HIST1H2BJ	HIST1H2BK;PRSS16
rs1321505	HDL	6	28052823	C	A	0.128394	-0.0133	0.0019	11.5918	10.4717	0.006252	na	na	na	na	na	ZKSCAN4	ZNF165	na	ZSCAN12;PGBD1;ZKSCAN4;NKAPL;ZSCAN31;ZSCAN9	na	ZKSCAN4	na	na	na	na	na	ZKSCAN4	NKAPL;PGBD1;ZNF165;ZSCAN12;ZSCAN31;ZSCAN9
rs13201681	logTG	6	28394680	C	T	0.914649	0.0183	0.0024	13.6125	11.2849	0.9217	na	na	na	RP1-265C24.8;ZSCAN9;ZKSCAN4;PGBD1;ZKSCAN3;ZSCAN12;LINC01623;TRIM27	ZKSCAN4;ZSCAN12	TRIM27	ZSCAN23	na	ZSCAN12;PGBD1	na	TRIM27	na	na	na	na	na	PGBD1;TRIM27;ZSCAN12	LINC01623;RP1-265C24.8;ZKSCAN3;ZKSCAN4;ZSCAN23;ZSCAN9
rs3118362	TC	6	28785085	C	T	0.077083	-0.0266	0.0026	23.8405	18.9841	0.4175	na	AL645939.1	na	ZKSCAN3;ZSCAN12;LINC01623;TRIM27;ZNF311;XXbac-BCX196D17.5	ZSCAN12	TRIM27	TRIM27	na	na	na	TRIM27	na	na	na	na	TRIM27	na	AL645939.1;LINC01623;XXbac-BCX196D17.5;ZKSCAN3;ZNF311;ZSCAN12
rs1233393	logTG	6	29549653	G	C	0.0934289	-0.0209	0.0024	17.5109	14.6106	0.9607	na	HLA-G;HLA-L	HLA-G;HLA-L	MAS1L;XXbac-BPG13B8.10;GABBR1;HLA-G;HLA-A;HCG9;ZNRD1;PPP1R11;RNF39	HLA-G;HLA-A;HCG9;ZNRD1;PPP1R11;RNF39	na	GABBR1	na	na	na	na	na	na	na	na	na	GABBR1;HLA-G	HCG9;HLA-A;HLA-L;MAS1L;PPP1R11;RNF39;XXbac-BPG13B8.10;ZNRD1
rs113360274	nonHDL	6	29850784	G	A	0.24013	0.0187	0.0019	22.1299	16.5395	0.6305	na	HCG4B;HLA-G;TRIM15;HLA-U;HLA-W	na	MAS1L;GABBR1;OR2H2;HLA-F;HLA-G;HLA-A;PPP1R11;RNF39;TRIM31;TRIM10;TRIM15;TRIM26;TRIM39;RPP21	HLA-F;HLA-G;HLA-A;TRIM10;TRIM15;TRIM39	HLA-A	HLA-G	na	na	TRIM39	HLA-A	na	na	na	na	HLA-G	HLA-A;TRIM15	GABBR1;HCG4B;HLA-F;HLA-U;HLA-W;MAS1L;OR2H2;PPP1R11;RNF39;RPP21;TRIM10;TRIM26;TRIM31;TRIM39
rs2248162	HDL	6	29915061	C	T	0.694229	0.0105	0.0014	13.1951	8.68523	0.4435	na	na	na	GABBR1;OR2H2;MOG;ZFP57;HLA-F;HLA-G;HCP5B;HLA-A;HCG9;PPP1R11;RNF39;TRIM31;TRIM10;TRIM15;TRIM26;TRIM39;RPP21	GABBR1;ZFP57;HLA-F;HLA-G;HLA-A;TRIM10;TRIM15;TRIM39;RPP21	GABBR1	HLA-A	na	na	TRIM39	GABBR1	na	na	na	na	na	GABBR1;HLA-A	HCG9;HCP5B;HLA-F;HLA-G;MOG;OR2H2;PPP1R11;RNF39;RPP21;TRIM10;TRIM15;TRIM26;TRIM31;TRIM39;ZFP57
rs3893464	LDL	6	29935250	G	A	0.522097	-0.0147	0.0013	28.9201	22.4433	0.7776	na	ZNRD1ASP;HCG4B;HLA-K;HLA-A;ETF1P1	ETF1P1	GABBR1;OR2H2;MOG;ZFP57;HLA-F;HLA-G;HCP5B;HLA-A;HCG9;PPP1R11;RNF39;TRIM31;TRIM10;TRIM15;TRIM26;TRIM39;RPP21	GABBR1;ZFP57;HLA-F;HLA-G;HLA-A;TRIM10;TRIM15;TRIM39;RPP21	na	HLA-A	na	na	TRIM39	na	na	na	na	na	HLA-A	na	ETF1P1;GABBR1;HCG4B;HCG9;HCP5B;HLA-F;HLA-G;HLA-K;MOG;OR2H2;PPP1R11;RNF39;RPP21;TRIM10;TRIM15;TRIM26;TRIM31;TRIM39;ZFP57;ZNRD1ASP
rs2844795	TC	6	30073847	C	T	0.438052	-0.0158	0.0013	33.2618	28.081	0.05169	na	HLA-G	HLA-G	GABBR1;ZFP57;HLA-F;HLA-G;HCP5B;HLA-A;HCG9;ZNRD1;PPP1R11;RNF39;TRIM31;TRIM40;TRIM10;TRIM15;TRIM26;HCG17;TRIM39;RPP21;HLA-E;PRR3;ABCF1	GABBR1;HLA-F;HLA-G;HLA-A;PPP1R11;RNF39;TRIM31;TRIM10;TRIM15;TRIM26;HCG17;TRIM39;RPP21;ABCF1	PPP1R10	TRIM31	na	na	TRIM39	na	na	na	na	na	na	HLA-G;TRIM31	ABCF1;GABBR1;HCG17;HCG9;HCP5B;HLA-A;HLA-E;HLA-F;PPP1R10;PPP1R11;PRR3;RNF39;RPP21;TRIM10;TRIM15;TRIM26;TRIM39;TRIM40;ZFP57;ZNRD1
rs2517601	logTG	6	30074072	G	C	0.903535	0.0229	0.0026	17.8936	18.1604	2.66e-05	na	FLOT1;LINC00243;IER3;PPP1R18	FLOT1;LINC00243	GABBR1;HLA-G;HLA-A;HCG9;ZNRD1;PPP1R11;RNF39;TRIM31;TRIM10;TRIM26;HCG17;RPP21;HLA-E	HLA-G;HLA-A;HCG9;ZNRD1;PPP1R11;RNF39;TRIM31;TRIM10;TRIM26	PPP1R10	TRIM31	na	na	TRIM39	na	na	na	na	na	na	TRIM31	FLOT1;GABBR1;HCG17;HCG9;HLA-A;HLA-E;HLA-G;IER3;LINC00243;PPP1R10;PPP1R11;PPP1R18;RNF39;RPP21;TRIM10;TRIM26;ZNRD1
rs56248798	nonHDL	6	30597083	C	T	0.962586	-0.0361	0.0044	15.6355	11.855	0.8515	na	TCF19;MIR6891;HLA-F-AS1;AL662844.4;HCG4B;HLA-A;HCG27;HLA-U	HLA-A;AL662844.4;TCF19;MIR6891	TRIM10;TRIM15;TRIM26;TRIM39;RPP21;ABCF1;PPP1R18;MDC1;FLOT1;LINC00243;XXbac-BPG27H4.8;DDR1;HCG22;C6orf15;PSORS1C1;CDSN	TRIM10;TRIM15;TRIM39;ABCF1;FLOT1;HCG22	PPP1R10	ATAT1	na	na	TRIM39	na	na	na	na	na	na	na	ABCF1;AL662844.4;ATAT1;C6orf15;CDSN;DDR1;FLOT1;HCG22;HCG27;HCG4B;HLA-A;HLA-F-AS1;HLA-U;LINC00243;MDC1;MIR6891;PPP1R10;PPP1R18;PSORS1C1;RPP21;TCF19;TRIM10;TRIM15;TRIM26;TRIM39;XXbac-BPG27H4.8
rs1264377	HDL	6	30764907	G	A	0.853899	0.0147	0.0019	13.9918	10.5797	0.3033	na	HLA-S;MICB;HLA-B;MICA;AL671883.2	HLA-S;AL671883.2	TRIM39;RPP21;HLA-E;ABCF1;MRPS18B;ATAT1;PPP1R18;MDC1;FLOT1;LINC00243;XXbac-BPG27H4.8;DDR1;VARS2;SFTA2;HCG22;C6orf15;PSORS1C1;CDSN;PSORS1C2;CCHCR1;TCF19;POU5F1;HCG27;HLA-C	TRIM39;RPP21;ABCF1;MRPS18B;FLOT1;VARS2;HCG22;PSORS1C1;PSORS1C2;CCHCR1;TCF19;HCG27	PPP1R10	IER3	na	na	TCF19;TRIM39	na	na	na	na	na	na	na	ABCF1;AL671883.2;ATAT1;C6orf15;CCHCR1;CDSN;DDR1;FLOT1;HCG22;HCG27;HLA-B;HLA-C;HLA-E;HLA-S;IER3;LINC00243;MDC1;MICA;MICB;MRPS18B;POU5F1;PPP1R10;PPP1R18;PSORS1C1;PSORS1C2;RPP21;SFTA2;TCF19;TRIM39;VARS2;XXbac-BPG27H4.8
rs1264347	logTG	6	30798697	C	T	0.892198	0.0246	0.0022	28.3006	31.1038	9.54e-08	na	HLA-G;MIR6891	na	RPP21;HLA-E;C6orf136;PPP1R18;NRM;MDC1;TUBB;FLOT1;IER3;HCG20;LINC00243;XXbac-BPG27H4.8;DDR1;VARS2;SFTA2;HCG22;C6orf15;PSORS1C1;CDSN;PSORS1C2;CCHCR1;TCF19;POU5F1;HCG27;HLA-C	PPP1R18;FLOT1;LINC00243;DDR1;VARS2;PSORS1C1;PSORS1C2;CCHCR1;TCF19;HCG27;HLA-C	PPP1R10	DDR1	na	CCHCR1	TCF19;TRIM39	na	na	na	na	na	na	CCHCR1;DDR1	C6orf136;C6orf15;CDSN;FLOT1;HCG20;HCG22;HCG27;HLA-C;HLA-E;HLA-G;IER3;LINC00243;MDC1;MIR6891;NRM;POU5F1;PPP1R10;PPP1R18;PSORS1C1;PSORS1C2;RPP21;SFTA2;TCF19;TUBB;VARS2;XXbac-BPG27H4.8
rs1265097	nonHDL	6	31106459	C	A	0.908838	-0.0302	0.0026	30.4631	26.1999	0.06631	na	na	na	PPP1R18;MDC1;FLOT1;LINC00243;XXbac-BPG27H4.8;DDR1;HCG22;C6orf15;PSORS1C1;CDSN;PSORS1C2;CCHCR1;TCF19;POU5F1;HCG27;HLA-C;HLA-B;XXbac-BPG181B23.7;MICA;LINC01149;DDX39B;NFKBIL1;LTA;LST1;NCR3;AIF1;PRRC2A	FLOT1;HCG22;CCHCR1;TCF19;HCG27;HLA-C;HLA-B;XXbac-BPG181B23.7;DDX39B;NFKBIL1;LTA;PRRC2A	PRRC2A	PSORS1C1	na	POLR2LP;CCHCR1;PSORS1C1;PSORS1C2	TCF19;TNF	PRRC2A	na	na	na	na	PSORS1C1	CCHCR1;PRRC2A;PSORS1C2	AIF1;C6orf15;CDSN;DDR1;DDX39B;FLOT1;HCG22;HCG27;HLA-B;HLA-C;LINC00243;LINC01149;LST1;LTA;MDC1;MICA;NCR3;NFKBIL1;POLR2LP;POU5F1;PPP1R18;TCF19;XXbac-BPG181B23.7;XXbac-BPG27H4.8
rs2524143	TC	6	31263510	C	T	0.753367	0.023	0.0015	52.3393	53.6251	5.56e-08	na	WASF5P;CYP21A1P;MSH5;AL671883.2;EHMT2;FLOT1	na	LINC00243;XXbac-BPG27H4.8;DDR1;VARS2;SFTA2;DPCR1;HCG22;C6orf15;PSORS1C1;CDSN;PSORS1C2;CCHCR1;TCF19;POU5F1;HCG27;HLA-C;XXbac-BPG248L24.13;HLA-B;XXbac-BPG181B23.7;MICA;LINC01149;MICB;DDX39B;ATP6V1G2;NFKBIL1;LTA;TNF;LST1;NCR3;AIF1;PRRC2A;BAG6;APOM;C6orf47;GPANK1;CSNK2B;LY6G5B;LY6G5C;ABHD16A;LY6G6F;LY6G6E;LY6G6D;C6orf25;LY6G6C;DDAH2;CLIC1	LINC00243;DDR1;VARS2;HCG22;PSORS1C1;PSORS1C2;CCHCR1;TCF19;HCG27;HLA-C;HLA-B;XXbac-BPG181B23.7;MICA;MICB;DDX39B;ATP6V1G2;NFKBIL1;LTA;NCR3;PRRC2A;APOM;GPANK1;CSNK2B;LY6G5B;LY6G5C;LY6G6D;LY6G6C;DDAH2;CLIC1	APOM	HLA-C	na	na	ABHD16A;TCF19;TNF	APOM	na	na	na	na	na	APOM;HLA-C	ABHD16A;AIF1;AL671883.2;ATP6V1G2;BAG6;C6orf15;C6orf25;C6orf47;CCHCR1;CDSN;CLIC1;CSNK2B;CYP21A1P;DDAH2;DDR1;DDX39B;DPCR1;EHMT2;FLOT1;GPANK1;HCG22;HCG27;HLA-B;LINC00243;LINC01149;LST1;LTA;LY6G5B;LY6G5C;LY6G6C;LY6G6D;LY6G6E;LY6G6F;MICA;MICB;MSH5;NCR3;NFKBIL1;POU5F1;PRRC2A;PSORS1C1;PSORS1C2;SFTA2;TCF19;TNF;VARS2;WASF5P;XXbac-BPG181B23.7;XXbac-BPG248L24.13;XXbac-BPG27H4.8
rs4947249	HDL	6	31302029	G	A	0.35821	-0.0178	0.0014	36.3075	33.8143	0.02972	na	na	na	XXbac-BPG27H4.8;DDR1;VARS2;SFTA2;HCG22;C6orf15;PSORS1C1;CDSN;PSORS1C2;CCHCR1;TCF19;POU5F1;HCG27;HLA-C;HLA-B;XXbac-BPG181B23.7;MICA;LINC01149;MICB;DDX39B;ATP6V1G2;NFKBIL1;LTA;TNF;NCR3;AIF1;PRRC2A;BAG6;APOM;GPANK1;CSNK2B;LY6G5B;ABHD16A;LY6G6F;LY6G6D;C6orf25;LY6G6C;DDAH2;CLIC1;MSH5;SAPCD1;VWA7;VARS;HSPA1L;HSPA1B	VARS2;HCG22;PSORS1C1;PSORS1C2;CCHCR1;TCF19;HCG27;HLA-B;XXbac-BPG181B23.7;MICA;DDX39B;NFKBIL1;LTA;PRRC2A;APOM;GPANK1;CSNK2B;LY6G6C;DDAH2;CLIC1;MSH5;VWA7;HSPA1B	APOM	HLA-B	na	VWA7	ABHD16A;TCF19;TNF	APOM	na	na	na	na	na	APOM;HLA-B;VWA7	ABHD16A;AIF1;ATP6V1G2;BAG6;C6orf15;C6orf25;CCHCR1;CDSN;CLIC1;CSNK2B;DDAH2;DDR1;DDX39B;GPANK1;HCG22;HCG27;HLA-C;HSPA1B;HSPA1L;LINC01149;LTA;LY6G5B;LY6G6C;LY6G6D;LY6G6F;MICA;MICB;MSH5;NCR3;NFKBIL1;POU5F1;PRRC2A;PSORS1C1;PSORS1C2;SAPCD1;SFTA2;TCF19;TNF;VARS;VARS2;XXbac-BPG181B23.7;XXbac-BPG27H4.8
rs9378248	logTG	6	31326289	G	A	0.585789	-0.0241	0.0013	75.9954	78.9809	1.12e-13	na	na	na	DDR1;VARS2;SFTA2;HCG22;C6orf15;PSORS1C1;CDSN;PSORS1C2;CCHCR1;TCF19;POU5F1;HCG27;HLA-C;HLA-B;XXbac-BPG181B23.7;MICA;LINC01149;MICB;DDX39B;ATP6V1G2;NFKBIL1;LTA;TNF;LST1;NCR3;AIF1;PRRC2A;BAG6;APOM;C6orf47;GPANK1;CSNK2B;LY6G5B;LY6G5C;ABHD16A;LY6G6F;LY6G6E;LY6G6D;C6orf25;LY6G6C;DDAH2;CLIC1;MSH5	DDR1;VARS2;PSORS1C1;PSORS1C2;CCHCR1;TCF19;HCG27;HLA-C;HLA-B;XXbac-BPG181B23.7;NFKBIL1;LTA;LST1;NCR3;PRRC2A;APOM;GPANK1;CSNK2B;LY6G5B;LY6G5C;ABHD16A;LY6G6D;C6orf25;LY6G6C;DDAH2;CLIC1;MSH5	APOM	HLA-B	na	CCHCR1	ABHD16A;TCF19;TNF	APOM	na	na	na	na	na	APOM;CCHCR1;HLA-B	ABHD16A;AIF1;ATP6V1G2;BAG6;C6orf15;C6orf25;C6orf47;CDSN;CLIC1;CSNK2B;DDAH2;DDR1;DDX39B;GPANK1;HCG22;HCG27;HLA-C;LINC01149;LST1;LTA;LY6G5B;LY6G5C;LY6G6C;LY6G6D;LY6G6E;LY6G6F;MICA;MICB;MSH5;NCR3;NFKBIL1;POU5F1;PRRC2A;PSORS1C1;PSORS1C2;SFTA2;TCF19;TNF;VARS2;XXbac-BPG181B23.7
rs622871	logTG	6	31878495	G	A	0.738682	0.0269	0.0015	71.1886	64.1327	0.02936	na	HLA-DOB;PSORS1C2;CDSN;CCHCR1	HLA-DOB	MICA;LINC01149;MICB;DDX39B;ATP6V1G2;NFKBIL1;LTA;TNF;LST1;NCR3;AIF1;PRRC2A;BAG6;APOM;C6orf47;GPANK1;CSNK2B;LY6G5B;LY6G5C;ABHD16A;LY6G6F;LY6G6E;LY6G6D;C6orf25;LY6G6C;DDAH2;CLIC1;MSH5;SAPCD1;VWA7;VARS;LSM2;HSPA1L;HSPA1A;HSPA1B;C6orf48;NEU1;SLC44A4;EHMT2;C2;ZBTB12;CFB;NELFE;SKIV2L;DXO;STK19;C4A;C4B;CYP21A2;CYP	NFKBIL1;LTA;LST1;NCR3;PRRC2A;APOM;GPANK1;CSNK2B;LY6G5B;LY6G5C;ABHD16A;LY6G6D;C6orf25;LY6G6C;DDAH2;CLIC1;MSH5;VWA7;LSM2;HSPA1B;NEU1;SLC44A4;EHMT2;C2;NELFE;SKIV2L;DXO;C4A;C4B;CYP21A2	APOM	C2	na	na	ABHD16A;CFB;TNF	APOM	na	na	na	na	na	APOM;C2	ABHD16A;AIF1;ATP6V1G2;BAG6;C4A;C4B;C6orf25;C6orf47;C6orf48;CCHCR1;CDSN;CFB;CLIC1;CSNK2B;CYP;CYP21A2;DDAH2;DDX39B;DXO;EHMT2;GPANK1;HLA-DOB;HSPA1A;HSPA1B;HSPA1L;LINC01149;LSM2;LST1;LTA;LY6G5B;LY6G5C;LY6G6C;LY6G6D;LY6G6E;LY6G6F;MICA;MICB;MSH5;NCR3;NELFE;NEU1;NFKBIL1;PRRC2A;PSORS1C2;SAPCD1;SKIV2L;SLC44A4;STK19;TNF;VARS;VWA7;ZBTB12
rs3128759	LDL	6	31885930	C	T	0.328507	-0.0166	0.0014	31.7042	28.2169	0.01521	na	HLA-DQB1;HLA-DQA1;HLA-DQB2;HLA-DRA	na	LINC01149;MICB;DDX39B;ATP6V1G2;NFKBIL1;LTA;TNF;NCR3;AIF1;PRRC2A;BAG6;APOM;GPANK1;CSNK2B;LY6G5B;ABHD16A;LY6G6F;LY6G6D;C6orf25;LY6G6C;DDAH2;CLIC1;MSH5;SAPCD1;VWA7;VARS;HSPA1L;HSPA1B;C6orf48;NEU1;SLC44A4;EHMT2;C2;ZBTB12;NELFE;SKIV2L;DXO;C4A;C4B;CYP21A2;TNXB;PRRT1;EGFL8;AGPAT1;RNF5;PBX2;NOTCH4;BTNL2	DDX39B;NFKBIL1;LTA;PRRC2A;APOM;GPANK1;CSNK2B;LY6G6C;DDAH2;CLIC1;MSH5;VWA7;HSPA1B;C6orf48;NEU1;SLC44A4;EHMT2;C2;NELFE;SKIV2L;C4A;C4B;CYP21A2;PRRT1;AGPAT1;NOTCH4	APOM	C2	na	na	ABHD16A;CFB;TNF	APOM	na	na	na	na	na	APOM;C2	ABHD16A;AGPAT1;AIF1;ATP6V1G2;BAG6;BTNL2;C4A;C4B;C6orf25;C6orf48;CLIC1;CSNK2B;CYP21A2;DDAH2;DDX39B;DXO;EGFL8;EHMT2;GPANK1;HLA-DQA1;HLA-DQB1;HLA-DQB2;HLA-DRA;HSPA1B;HSPA1L;LINC01149;LTA;LY6G5B;LY6G6C;LY6G6D;LY6G6F;MICB;MSH5;NCR3;NELFE;NEU1;NFKBIL1;NOTCH4;PBX2;PRRC2A;PRRT1;RNF5;SAPCD1;SKIV2L;SLC44A4;TNF;TNXB;VARS;VWA7;ZBTB12
rs3128759	nonHDL	6	31885930	C	T	0.328312	-0.0203	0.0017	32.1415	30.8947	0.002085	na	HLA-DQA1;USP8P1;HLA-DRA;HLA-DQB2;HLA-DQB1;HCG27;TAP2	na	LINC01149;DDX39B;NFKBIL1;LTA;LST1;NCR3;AIF1;PRRC2A;BAG6;APOM;GPANK1;CSNK2B;LY6G5B;LY6G5C;ABHD16A;LY6G6F;LY6G6E;LY6G6D;C6orf25;LY6G6C;DDAH2;CLIC1;MSH5;SAPCD1;VWA7;VARS;HSPA1L;HSPA1B;C6orf48;NEU1;SLC44A4;EHMT2;C2;ZBTB12;NELFE;SKIV2L;DXO;STK19;C4A;C4B;CYP21A2;TNXB;PRRT1;EGFL8;AGPAT1;RNF5;NOTCH4;C6orf10;BTNL2	DDX39B;NFKBIL1;LTA;PRRC2A;APOM;CSNK2B;LY6G5B;LY6G5C;LY6G6D;LY6G6C;DDAH2;CLIC1;MSH5;VWA7;HSPA1B;C6orf48;NEU1;SLC44A4;EHMT2;C2;NELFE;SKIV2L;C4A;C4B;CYP21A2;PRRT1;AGPAT1;RNF5;NOTCH4	APOM	C2	na	na	ABHD16A;CFB;TNF	APOM	na	na	na	na	na	APOM;C2	ABHD16A;AGPAT1;AIF1;BAG6;BTNL2;C4A;C4B;C6orf10;C6orf25;C6orf48;CLIC1;CSNK2B;CYP21A2;DDAH2;DDX39B;DXO;EGFL8;EHMT2;GPANK1;HCG27;HLA-DQA1;HLA-DQB1;HLA-DQB2;HLA-DRA;HSPA1B;HSPA1L;LINC01149;LST1;LTA;LY6G5B;LY6G5C;LY6G6C;LY6G6D;LY6G6E;LY6G6F;MSH5;NCR3;NELFE;NEU1;NFKBIL1;NOTCH4;PRRC2A;PRRT1;RNF5;SAPCD1;SKIV2L;SLC44A4;STK19;TAP2;TNXB;USP8P1;VARS;VWA7;ZBTB12
rs3128759	TC	6	31885930	C	T	0.32005	-0.0208	0.0013	56.8936	49.253	7.63e-05	na	HLA-DOB;HCG27;PBX2;HSPA1L;USP8P1;BTNL2;TAP1;HLA-DRA	PBX2	LINC01149;MICB;DDX39B;ATP6V1G2;NFKBIL1;LTA;TNF;LST1;NCR3;AIF1;PRRC2A;BAG6;APOM;C6orf47;GPANK1;CSNK2B;LY6G5B;LY6G5C;ABHD16A;LY6G6F;LY6G6E;LY6G6D;C6orf25;LY6G6C;DDAH2;CLIC1;MSH5;SAPCD1;VWA7;VARS;HSPA1L;HSPA1B;C6orf48;NEU1;SLC44A4;EHMT2;C2;ZBTB12;CFB;NELFE;SKIV2L;DXO;C4A;C4B;CYP21A2;TNXB;PRRT1;PPT2;EGFL8;AGPAT1	MICB;DDX39B;ATP6V1G2;NFKBIL1;LTA;NCR3;PRRC2A;APOM;GPANK1;CSNK2B;LY6G5B;LY6G5C;LY6G6D;LY6G6C;DDAH2;CLIC1;MSH5;VWA7;HSPA1B;C6orf48;NEU1;SLC44A4;EHMT2;C2;ZBTB12;NELFE;SKIV2L;C4A;C4B;CYP21A2;PRRT1;PPT2;AGPAT1	APOM	C2	na	na	ABHD16A;CFB;TNF	APOM	na	na	na	na	na	APOM;C2;HSPA1L	ABHD16A;AGPAT1;AIF1;ATP6V1G2;BAG6;BTNL2;C4A;C4B;C6orf25;C6orf47;C6orf48;CFB;CLIC1;CSNK2B;CYP21A2;DDAH2;DDX39B;DXO;EGFL8;EHMT2;GPANK1;HCG27;HLA-DOB;HLA-DRA;HSPA1B;LINC01149;LST1;LTA;LY6G5B;LY6G5C;LY6G6C;LY6G6D;LY6G6E;LY6G6F;MICB;MSH5;NCR3;NELFE;NEU1;NFKBIL1;PBX2;PPT2;PRRC2A;PRRT1;SAPCD1;SKIV2L;SLC44A4;TAP1;TNF;TNXB;USP8P1;VARS;VWA7;ZBTB12
rs2071805	logTG	6	32441696	C	T	0.94434	-0.0634	0.0028	112.785	103.529	8.07e-09	na	na	na	STK19;C4A;C4B;CYP21A2;TNXB;ATF6B;FKBPL;PRRT1;PPT2;EGFL8;AGPAT1;RNF5;AGER;PBX2;GPSM3;NOTCH4;C6orf10;BTNL2;HLA-DRA;HLA-DRB5;HLA-DRB1;HLA-DQA1;HLA-DQB1;HLA-DQA2;HLA-DQB2;HLA-DOB;TAP2;PSMB8;PSMB9;TAP1;HLA-DMB;HLA-DMA;BRD2	C4A;C4B;CYP21A2;TNXB;ATF6B;FKBPL;PRRT1;AGPAT1;RNF5;PBX2;GPSM3;NOTCH4;BTNL2;HLA-DRA;HLA-DRB5;HLA-DRB1;HLA-DQA1;HLA-DQB1;HLA-DQA2;HLA-DQB2;HLA-DOB;TAP2;PSMB8;HLA-DMB;HLA-DMA	BRD2	HLA-DRA	na	na	BRD2;CFB	BRD2	na	na	na	na	na	BRD2;HLA-DRA	AGER;AGPAT1;ATF6B;BTNL2;C4A;C4B;C6orf10;CYP21A2;EGFL8;FKBPL;GPSM3;HLA-DMA;HLA-DMB;HLA-DOB;HLA-DQA1;HLA-DQA2;HLA-DQB1;HLA-DQB2;HLA-DRB1;HLA-DRB5;NOTCH4;PBX2;PPT2;PRRT1;PSMB8;PSMB9;RNF5;STK19;TAP1;TAP2;TNXB
rs35062987	TC	6	32590735	C	T	0.796176	-0.0404	0.0016	139.946	124.602	0.1227	na	na	na	PRRT1;PPT2;EGFL8;AGPAT1;RNF5;AGER;PBX2;GPSM3;NOTCH4;C6orf10;BTNL2;HLA-DRA;HLA-DRB5;HLA-DRB1;HLA-DQA1;HLA-DQB1;HLA-DQA2;HLA-DQB2;HLA-DOB;TAP2;PSMB8;PSMB8-AS1;PSMB9;TAP1;HLA-DMB;HLA-DMA;BRD2;HLA-DOA;HLA-DPA1;HLA-DPB1	PRRT1;PPT2;AGPAT1;RNF5;GPSM3;NOTCH4;BTNL2;HLA-DRA;HLA-DRB5;HLA-DQA1;HLA-DQB1;HLA-DQA2;HLA-DQB2;HLA-DOB;PSMB8-AS1;HLA-DMA;BRD2;HLA-DPA1	BRD2	HLA-DQA1	na	na	BRD2;COL11A2;RXRB	BRD2	na	na	na	na	na	BRD2;HLA-DQA1	AGER;AGPAT1;BTNL2;C6orf10;EGFL8;GPSM3;HLA-DMA;HLA-DMB;HLA-DOA;HLA-DOB;HLA-DPA1;HLA-DPB1;HLA-DQA2;HLA-DQB1;HLA-DQB2;HLA-DRA;HLA-DRB1;HLA-DRB5;NOTCH4;PBX2;PPT2;PRRT1;PSMB8;PSMB8-AS1;PSMB9;RNF5;TAP1;TAP2
rs73728888	HDL	6	32596370	C	T	0.950374	0.0378	0.0035	26.4632	22.0095	0.002378	na	na	na	PRRT1;EGFL8;AGPAT1;RNF5;PBX2;NOTCH4;BTNL2;HLA-DRA;HLA-DRB5;HLA-DRB1;HLA-DQA1;HLA-DQB1;HLA-DQA2;HLA-DQB2;HLA-DOB;TAP2;BRD2;HLA-DPB1	PRRT1;AGPAT1;NOTCH4;HLA-DRA;HLA-DRB5;HLA-DQA1;HLA-DQB1;HLA-DQA2;HLA-DQB2;HLA-DOB;TAP2	BRD2	HLA-DQA1	na	na	BRD2;COL11A2;RXRB	BRD2	na	na	na	na	na	BRD2;HLA-DQA1	AGPAT1;BTNL2;EGFL8;HLA-DOB;HLA-DPB1;HLA-DQA2;HLA-DQB1;HLA-DQB2;HLA-DRA;HLA-DRB1;HLA-DRB5;NOTCH4;PBX2;PRRT1;RNF5;TAP2
rs6689	nonHDL	6	32627700	G	A	0.204422	0.045	0.0021	101.14	95.2142	0.03363	na	na	na	EGFL8;AGPAT1;RNF5;NOTCH4;C6orf10;BTNL2;HLA-DRA;HLA-DRB5;HLA-DRB1;HLA-DQA1;HLA-DQB1;HLA-DQA2;HLA-DQB1;HLA-DOB;TAP2;BRD2;HLA-DOA;HLA-DPA1;HLA-DPB1	AGPAT1;RNF5;NOTCH4;HLA-DRA;HLA-DRB5;HLA-DQA1;HLA-DQB1;HLA-DQA2;HLA-DQB1;HLA-DPA1	BRD2	HLA-DQB1	na	na	BRD2;COL11A2;RXRB	BRD2	na	na	na	na	HLA-DQB1	BRD2	AGPAT1;BTNL2;C6orf10;EGFL8;HLA-DOA;HLA-DOB;HLA-DPA1;HLA-DPB1;HLA-DQA1;HLA-DQA2;HLA-DRA;HLA-DRB1;HLA-DRB5;NOTCH4;RNF5;TAP2
rs35282906	LDL	6	32657201	T	A	0.883122	-0.0429	0.002	101.34	92.4132	0.03439	na	na	na	PBX2;NOTCH4;BTNL2;HLA-DRA;HLA-DRB5;HLA-DRB1;HLA-DQA1;HLA-DQB1;HLA-DQA2;HLA-DQB1;HLA-DOB;TAP2;BRD2;HLA-DPB1	NOTCH4;HLA-DRA;HLA-DRB5;HLA-DQA1;HLA-DQB1;HLA-DQA2;HLA-DQB1;HLA-DOB;TAP2	BRD2	HLA-DQB1	na	na	BRD2;COL11A2;RXRB	BRD2	na	na	na	na	HLA-DQB1	BRD2	BTNL2;HLA-DOB;HLA-DPB1;HLA-DQA1;HLA-DQA2;HLA-DRA;HLA-DRB1;HLA-DRB5;NOTCH4;PBX2;TAP2
rs148889882	HDL	6	34141700	C	A	0.971202	0.0416	0.0039	25.8364	20.6416	0.3698	na	SNRPC;UHRF1BP1;PHF1	SNRPC	RPS10;SPDEF;C6orf106	RPS10	HMGA1	GRM4	na	MLN	na	na	na	na	na	na	na	na	C6orf106;GRM4;HMGA1;MLN;PHF1;RPS10;SNRPC;SPDEF;UHRF1BP1
rs77136196	logTG	6	34247047	C	T	0.966191	-0.0242	0.0036	10.7472	8.20614	0.276	na	na	na	LEMD2;HMGA1	HMGA1	HMGA1	NUDT3	na	PACSIN1	na	HMGA1	na	na	na	na	na	HMGA1	LEMD2;NUDT3;PACSIN1
rs3800461	LDL	6	34616322	G	C	0.895157	0.0244	0.0021	30.4818	27.2933	0.06922	na	C6orf106	C6orf106	RPS10;SPDEF;C6orf106;SNRPC;UHRF1BP1;TAF11;ANKS1A;TCP11	RPS10;ANKS1A;TCP11	HMGA1	C6orf106	na	C6orf106	na	na	na	na	na	C6orf106	na	na	ANKS1A;HMGA1;RPS10;SNRPC;SPDEF;TAF11;TCP11;UHRF1BP1
rs3800461	nonHDL	6	34616322	G	C	0.897613	0.0218	0.0024	18.9776	14.3219	0.3719	na	C6orf106	C6orf106	SPDEF;C6orf106;SNRPC;UHRF1BP1;TAF11;TCP11	na	HMGA1	C6orf106	na	C6orf106	na	na	na	na	na	C6orf106	na	na	HMGA1;SNRPC;SPDEF;TAF11;TCP11;UHRF1BP1
rs3800461	TC	6	34616322	G	C	0.899123	0.0346	0.002	66.3275	57.9412	0.0917	na	C6orf106	C6orf106	RPS10;SPDEF;C6orf106;SNRPC;UHRF1BP1;TCP11	RPS10;SPDEF;C6orf106;SNRPC;UHRF1BP1	HMGA1	C6orf106	na	C6orf106	na	na	na	na	na	C6orf106	na	na	HMGA1;RPS10;SNRPC;SPDEF;TCP11;UHRF1BP1
rs2744944	HDL	6	34658080	C	A	0.616145	0.027	0.0013	95.0853	85.4814	0.0001057	na	SNRPC;UHRF1BP1	SNRPC	RPS10;SPDEF;C6orf106;SNRPC;UHRF1BP1;TAF11;ANKS1A;TCP11	RPS10;ANKS1A;TCP11	HMGA1	C6orf106	na	UHRF1BP1	na	na	na	na	na	na	UHRF1BP1	C6orf106;SNRPC	ANKS1A;HMGA1;RPS10;SPDEF;TAF11;TCP11
rs6934083	logTG	6	35237153	C	T	0.948516	-0.015	0.0029	6.63622	8.6592	3.46e-05	na	DEF6	na	DEF6;PPARD	na	PPARD	ZNF76	na	ZNF76	PPARD;SCUBE3	PPARD	na	na	na	na	na	DEF6;PPARD;ZNF76	na
rs11754612	HDL	6	35476562	T	A	0.897427	0.0167	0.0021	14.7376	11.1008	0.1178	na	C6orf106;UHRF1BP1;AL031577.1;SNRPC	C6orf106	ANKS1A;TCP11;SCUBE3;RP3-329A5.8;ZNF76;DEF6;PPARD;CLPSL1	ANKS1A;TCP11;SCUBE3;RP3-329A5.8;ZNF76;DEF6;PPARD	PPARD	TULP1	na	na	CLPS;PPARD;SCUBE3	PPARD	na	na	na	na	na	PPARD	AL031577.1;ANKS1A;C6orf106;CLPSL1;DEF6;RP3-329A5.8;SCUBE3;SNRPC;TCP11;TULP1;UHRF1BP1;ZNF76
rs11759543	nonHDL	6	35508531	G	A	0.936312	0.0217	0.0032	10.9239	7.86878	0.5086	na	C6orf106;DEF6;ZNF76	C6orf106;DEF6	TCP11;SCUBE3;RP3-329A5.8;ZNF76;DEF6;PPARD;CLPSL2;CLPSL1	SCUBE3;RP3-329A5.8;ZNF76;DEF6;PPARD	PPARD	TULP1	na	na	CLPS;PPARD;SCUBE3	PPARD	na	na	na	na	na	DEF6;PPARD;ZNF76	C6orf106;CLPSL1;CLPSL2;RP3-329A5.8;SCUBE3;TCP11;TULP1
rs7772800	HDL	6	36477260	G	A	0.783893	0.0109	0.0015	12.4336	9.04548	0.276	na	na	na	na	na	CDKN1A	STK38	KCTD20;STK38;SRSF3	KCTD20	CDKN1A;PNPLA1	na	STK38;KCTD20	na	na	na	na	KCTD20;STK38	CDKN1A;SRSF3
rs730506	logTG	6	36645968	G	C	0.799309	0.0111	0.0015	12.8659	8.75517	0.6382	na	RAB44	na	BRPF3;CDKN1A;RAB44;MTCH1	BRPF3	CDKN1A	CDKN1A	CDKN1A	na	CDKN1A;PNPLA1	CDKN1A	CDKN1A	na	na	CDKN1A	na	RAB44	BRPF3;MTCH1
rs9296208	nonHDL	6	37029684	C	A	0.576826	-0.0139	0.0015	19.7166	14.6229	0.7576	na	na	na	FGD2	na	CDKN1A	COX6A1P2	na	na	CDKN1A	na	na	na	na	na	na	na	CDKN1A;COX6A1P2;FGD2
rs11380614	LDL	6	37037818	TA	T	0.551419	-0.0125	0.0014	18.365	14.697	0.7471	na	na	na	na	na	CDKN1A	COX6A1P2	na	na	CDKN1A	na	na	na	na	na	na	na	CDKN1A;COX6A1P2
rs913499	TC	6	37038432	G	A	0.565119	-0.0155	0.0012	37.4407	28.8462	0.4017	na	na	na	FGD2	na	CDKN1A	COX6A1P2	na	na	CDKN1A	na	na	na	na	na	na	na	CDKN1A;COX6A1P2;FGD2
rs11759627	LDL	6	39238772	C	T	0.714207	-0.0091	0.0014	10.0952	7.71825	0.06075	na	na	na	na	na	na	KCNK17	na	na	na	na	na	na	na	na	na	na	KCNK17
rs11759627	TC	6	39238772	C	T	0.72377	-0.0096	0.0014	11.1533	8.44075	0.2445	na	na	na	na	na	na	KCNK17	na	na	na	na	na	na	na	na	na	na	KCNK17
rs143069752	nonHDL	6	40962537	T	A	0.93411	0.0221	0.003	12.7571	10.472	0.02045	na	na	na	na	na	UNC5CL	UNC5CL	UNC5CL	UNC5CL	UNC5CL	UNC5CL	UNC5CL	na	na	UNC5CL	na	na	na
rs742493	logTG	6	40998167	C	T	0.106657	-0.018	0.002	18.6464	14.9366	0.1027	na	na	na	TREM2	na	na	UNC5CL	TREML1;NFYA;TSPO2;UNC5CL	UNC5CL;OARD1;TREML1	UNC5CL	na	UNC5CL	na	na	na	UNC5CL	TREML1	NFYA;OARD1;TREM2;TSPO2
rs142449754	HDL	6	41986427	C	T	0.771223	0.0166	0.0015	27.7398	26.9066	7.59e-05	na	na	na	na	na	FOXP4	CCND3	CCND3	na	na	na	CCND3	na	na	na	na	CCND3	FOXP4
rs7747505	logTG	6	42839062	G	A	0.292803	0.0099	0.0015	10.386	8.01496	0.3188	na	na	na	GLTSCR1L;RPL7L1;PTCRA;CNPY3;GNMT	GLTSCR1L;RPL7L1;PTCRA;GNMT	SRF	GLTSCR1L	PTCRA;GLTSCR1L;C6orf226	na	CUL7;GNMT	na	PTCRA	na	na	na	GLTSCR1L	PTCRA	C6orf226;CNPY3;GNMT;RPL7L1;SRF
rs3818554	nonHDL	6	42934620	C	T	0.49071	0.012	0.0015	14.9051	11.3398	0.5714	na	GNMT;CNPY3;PEX6;PPP2R5D;AL035587.1	GNMT;PEX6	CNPY3;GNMT;PEX6;PPP2R5D;KLC4	GNMT;PEX6;PPP2R5D	CUL7	PEX6	PEX6;GNMT;PPP2R5D	na	CUL7;GNMT	na	PEX6;GNMT;PPP2R5D	na	na	PEX6	GNMT;PPP2R5D	CNPY3	AL035587.1;CUL7;KLC4
rs2395943	LDL	6	42940673	G	A	0.597012	-0.0134	0.0013	24.1868	19.3544	0.8187	na	AL035587.1;CNPY3;GNMT;PEX6;PPP2R5D	GNMT;PEX6	CNPY3;GNMT;PEX6;PPP2R5D;KLC4	CNPY3;GNMT;PEX6;PPP2R5D	PEX6	PEX6	GNMT;KLC4;PEX6;CUL7	na	CUL7;GNMT	PEX6	GNMT;KLC4;PEX6	na	PEX6	na	GNMT	CNPY3;KLC4;PPP2R5D	AL035587.1;CUL7
rs9296406	HDL	6	42940810	C	T	0.529084	0.0155	0.0013	32.0471	28.5521	0.04251	na	PPP2R5D;GNMT;CNPY3;PEX6	PEX6;GNMT	CNPY3;GNMT;PEX6;PPP2R5D;KLC4	CNPY3;GNMT;PEX6;PPP2R5D	SRF	PEX6	PEX6;GNMT;PPP2R5D;CNPY3	na	CUL7;GNMT	na	PEX6;GNMT;PPP2R5D;CNPY3	na	na	PEX6	CNPY3;GNMT;PPP2R5D	na	KLC4;SRF
rs9472125	LDL	6	43756169	C	T	0.884707	0.0143	0.0022	10.0952	7.87945	0.1255	na	RPL7L1	na	MRPL14	na	VEGFA	VEGFA	VEGFA	POLR1C;LRRC73;TJAP1	na	VEGFA	VEGFA	na	na	na	VEGFA	na	LRRC73;MRPL14;POLR1C;RPL7L1;TJAP1
rs998584	logTG	6	43757896	C	A	0.528899	-0.0364	0.0013	171.789	158.09	0.5182	na	na	na	VEGFA	VEGFA	VEGFA	VEGFA	VEGFA	na	na	VEGFA	VEGFA	na	na	VEGFA	na	na	na
rs998584	nonHDL	6	43757896	C	A	0.516291	-0.0221	0.0015	48.4047	39.7701	0.4535	na	na	na	MRPL14	na	VEGFA	VEGFA	VEGFA	na	na	VEGFA	VEGFA	na	na	na	VEGFA	na	MRPL14
rs998584	TC	6	43757896	C	A	0.528978	-0.0093	0.0013	12.0738	8.75894	0.9242	na	na	na	MRPL14	na	VEGFA	VEGFA	VEGFA	XPO5	na	VEGFA	VEGFA	na	na	na	VEGFA	na	MRPL14;XPO5
rs11967262	HDL	6	43760327	G	C	0.477031	-0.0309	0.0013	124.158	116.056	0.005133	na	na	na	MRPL14	na	VEGFA	VEGFA	VEGFA	MRPL14	na	VEGFA	VEGFA	na	na	na	VEGFA	MRPL14	na
rs9367489	LDL	6	52458678	G	C	0.657964	0.0137	0.0013	25.2409	19.6072	0.6038	na	na	na	EFHC1;TRAM2;TRAM2-AS1;GSTA2;GSTA1;GSTA5	TRAM2;TRAM2-AS1;GSTA2;GSTA1	GSTA1	TRAM2	na	EFHC1;TRAM2	na	GSTA1	na	na	na	na	TRAM2	EFHC1;GSTA1	GSTA2;GSTA5;TRAM2-AS1
rs9367489	TC	6	52458678	G	C	0.662055	0.0122	0.0013	20.1997	16.6541	0.5329	na	na	na	TRAM2;TRAM2-AS1;GSTA2;GSTA1;GSTA5	TRAM2;TRAM2-AS1;GSTA2;GSTA1	GSTA1	TRAM2	na	GSTA4	na	GSTA1	na	na	na	na	na	GSTA1;TRAM2	GSTA2;GSTA4;GSTA5;TRAM2-AS1
rs2749013	HDL	6	52627165	G	A	0.687227	0.0135	0.0013	24.5356	17.4513	0.1562	na	GSTA2;GSTA7P	GSTA7P;GSTA2	EFHC1;TRAM2;TRAM2-AS1;GSTA2;GSTA1	TRAM2;TRAM2-AS1;GSTA2;GSTA1	GSTA1	GSTA2	GSTA1	na	na	GSTA1	GSTA1	na	na	na	GSTA1;GSTA2	na	EFHC1;GSTA7P;TRAM2;TRAM2-AS1
rs6458869	logTG	6	52630269	C	A	0.337094	0.0184	0.0013	44.7525	37.6265	0.01985	na	GSTA2;GSTA4;GSTA7P	GSTA2;GSTA4;GSTA7P	TRAM2-AS1;GSTA2;GSTA1;GSTA5	GSTA2;GSTA1	TRAM2	GSTA2	na	na	na	na	na	na	na	na	GSTA2	na	GSTA1;GSTA4;GSTA5;GSTA7P;TRAM2;TRAM2-AS1
rs2894801	nonHDL	6	52643065	G	A	0.393257	0.0149	0.0016	19.9036	16.5572	0.4817	na	GSTA2;GSTA1;TMEM14A;AL109918.1	na	TRAM2;TRAM2-AS1;GSTA2;GSTA1;GSTA5	TRAM2;TRAM2-AS1;GSTA2;GSTA1	GSTA1	GSTA1	GSTA1	na	na	GSTA1	GSTA1	na	GSTA1	na	na	GSTA2	AL109918.1;GSTA5;TMEM14A;TRAM2;TRAM2-AS1
rs6458949	nonHDL	6	53508265	G	T	0.74907	-0.0165	0.0017	21.5458	19.0021	0.02195	na	na	na	GCLC	GCLC	GCLC	KLHL31	GCLC	na	na	GCLC	GCLC	na	na	na	GCLC	na	KLHL31
rs12662589	LDL	6	53509035	G	C	0.7539	-0.0139	0.0015	19.7166	17.9374	0.05409	na	na	na	GCLC	GCLC	GCLC	KLHL31	GCLC	na	na	GCLC	GCLC	na	na	na	GCLC	na	KLHL31
rs12662589	TC	6	53509035	G	C	0.75771	-0.0137	0.0014	21.8871	18.5902	0.04415	na	na	na	GCLC;MLIP	GCLC;MLIP	GCLC	KLHL31	GCLC	na	na	GCLC	GCLC	na	na	na	GCLC	na	KLHL31;MLIP
rs398085093	logTG	6	86296925	C	CA	0.408394	0.0106	0.0014	13.4328	12.245	0.07989	na	na	na	NT5E;SNX14;SYNCRIP	NT5E;SNX14;SYNCRIP	SYNCRIP	SNX14	na	na	na	SYNCRIP	na	na	na	na	na	SNX14;SYNCRIP	NT5E
rs2842611	HDL	6	86302034	G	A	0.482133	-0.0087	0.0013	10.6582	8.30964	0.3278	na	na	na	na	na	na	SNX14	SYNCRIP	na	na	na	na	na	na	na	na	na	SNX14;SYNCRIP
rs146824639	TC	6	88166740	C	T	0.285476	0.0098	0.0014	11.5918	8.05673	0.623	na	na	na	CGA;ZNF292;C6orf163;CFAP206;SLC35A1;RARS2;ORC3	C6orf163;RARS2;ORC3	ZNF292	C6ORF165	na	na	na	ZNF292	na	na	na	na	na	ZNF292	C6orf163;C6ORF165;CFAP206;CGA;ORC3;RARS2;SLC35A1
rs77910749	HDL	6	98566506	C	CT	0.439701	0.0104	0.0013	14.9051	10.8451	0.3265	na	na	na	na	na	na	na	na	na	na	na	na	na	na	na	na	na	na
rs17789218	nonHDL	6	100600097	C	T	0.208397	-0.0218	0.0019	29.7474	26.5184	0.06324	na	na	na	ASCC3	ASCC3	na	MCHR2	na	na	na	na	na	na	na	na	na	na	ASCC3;MCHR2
rs9496567	LDL	6	100602753	G	A	0.772237	0.0189	0.0015	35.6754	31.323	0.005554	na	na	na	ASCC3	ASCC3	na	MCHR2	na	na	na	na	na	na	na	na	na	na	ASCC3;MCHR2
rs9496614	logTG	6	100613551	C	T	0.228246	-0.0117	0.0015	14.2083	9.74237	0.7415	na	na	na	na	na	na	MCHR2	na	na	na	na	na	na	na	na	na	na	MCHR2
rs9496614	TC	6	100613551	C	T	0.220253	-0.0197	0.0015	38.6734	34.8692	0.01827	na	na	na	ASCC3	ASCC3	na	MCHR2	na	na	na	na	na	na	na	na	na	na	ASCC3;MCHR2
rs12524934	nonHDL	6	101431977	C	T	0.554316	-0.012	0.0015	14.9051	13.3489	0.005032	na	na	na	ASCC3;GRIK2	ASCC3	na	ASCC3	na	na	na	na	na	na	na	na	na	ASCC3	GRIK2
rs12524934	TC	6	101431977	C	T	0.559146	-0.0123	0.0012	23.9269	18.5032	0.2103	na	na	na	ASCC3;GRIK2	ASCC3	na	ASCC3	ASCC3	na	na	na	ASCC3	na	na	na	ASCC3	na	GRIK2
rs1358756	LDL	6	101432314	G	A	0.444751	0.0122	0.0013	20.1997	16.2629	0.359	na	na	na	ASCC3;GRIK2	ASCC3	na	ASCC3	na	na	na	na	na	na	na	na	na	ASCC3	GRIK2
rs6913325	LDL	6	106378009	G	T	0.580848	0.0107	0.0013	15.7305	11.9046	0.7678	na	na	na	na	na	na	PRDM1	na	na	na	na	na	na	na	na	na	na	PRDM1
rs6913325	logTG	6	106378009	G	T	0.582228	0.0091	0.0013	11.5918	8.81622	0.3564	na	na	na	na	na	PRDM1	PRDM1	PRDM1	na	na	PRDM1	PRDM1	na	na	na	PRDM1	na	na
rs6913325	nonHDL	6	106378009	G	T	0.57288	0.014	0.0015	19.9889	16.0119	0.1579	na	na	na	na	na	na	PRDM1	na	na	na	na	na	na	na	na	na	na	PRDM1
rs6913325	TC	6	106378009	G	T	0.581064	0.0103	0.0012	17.0354	11.7439	0.6887	na	na	na	na	na	na	PRDM1	na	na	na	na	na	na	na	na	na	na	PRDM1
rs35045014	logTG	6	107432157	C	A	0.54836	-0.0123	0.0013	20.5179	16.2332	0.145	na	BEND3	na	BEND3	BEND3	PDSS2	BEND3	BEND3	na	na	na	BEND3	na	na	BEND3	na	na	PDSS2
rs60033497	HDL	6	107444903	G	C	0.703614	-0.0094	0.0014	10.7236	7.3392	0.3629	na	CD24	na	na	na	SOBP	BEND3	BEND3	na	na	na	BEND3	na	na	na	na	BEND3	CD24;SOBP
rs565216100	HDL	6	109064220	C	T	0.85573	-0.0174	0.0022	14.5862	10.4408	0.3587	na	AK9;CCDC162P;AL359711.2;SMPD2;CD164	CCDC162P	SESN1	na	FOXO3	FOXO3	na	na	na	FOXO3	na	na	na	na	na	FOXO3	AK9;AL359711.2;CCDC162P;CD164;SESN1;SMPD2
rs9480889	logTG	6	109189021	G	C	0.782974	0.0143	0.0015	20.8173	16.5299	0.2083	na	na	na	ARMC2;SESN1	ARMC2	FOXO3	ARMC2	na	na	na	na	na	na	na	na	na	ARMC2	FOXO3;SESN1
rs11153143	TC	6	109300661	C	T	0.88374	0.0153	0.0019	15.0913	11.2263	0.2625	na	na	na	SESN1;CEP57L1	SESN1;CEP57L1	FOXO3	ARMC2	SESN1	SESN1;RP11-787I22.3	na	na	SESN1	na	na	na	SESN1	na	ARMC2;CEP57L1;FOXO3;RP11-787I22.3
rs2273668	LDL	6	109323519	G	T	0.886245	0.0137	0.002	11.1316	8.93963	0.08642	na	na	na	SESN1	na	SMPD2	SESN1	SESN1	SESN1;RP11-787I22.3	na	na	SESN1	na	na	SESN1	na	na	RP11-787I22.3;SMPD2
rs4946955	HDL	6	109639710	G	C	0.312618	-0.0164	0.0013	35.7602	29.2441	0.0146	na	CD164;CCDC162P	CCDC162P	SESN1	na	MICAL1	CD164	CD164	na	na	na	CD164	na	na	na	CD164	na	CCDC162P;MICAL1;SESN1
rs3822855	TC	6	116316882	G	T	0.567975	-0.0206	0.0012	65.3263	53.4738	0.6343	na	na	na	FRK;NT5DC1;COL10A1;TSPYL4;DSE;TSPYL1;FAM26F	FRK;NT5DC1;COL10A1;TSPYL4;DSE;TSPYL1	na	FRK	FRK;NT5DC1	FRK	na	na	FRK;NT5DC1	na	na	FRK	na	NT5DC1	COL10A1;DSE;FAM26F;TSPYL1;TSPYL4
rs1538385	HDL	6	116327493	G	A	0.420235	0.0157	0.0013	32.8543	26.7808	0.6075	na	na	na	FRK;NT5DC1;COL10A1;TSPYL4;DSE;TSPYL1	FRK;NT5DC1;COL10A1;TSPYL4;DSE;TSPYL1	TSPYL1	FRK	na	FRK	na	TSPYL1	na	na	na	na	FRK	TSPYL1	COL10A1;DSE;NT5DC1;TSPYL4
rs6918059	nonHDL	6	116349041	C	T	0.633936	0.0175	0.0016	27.1176	23.643	0.2804	na	na	na	FRK;NT5DC1;COL10A1;TSPYL4;DSE;TSPYL1;FAM26E	FRK;NT5DC1;COL10A1;TSPYL4;DSE;FAM26E	na	FRK	FRK	DSE	na	na	FRK	na	na	na	FRK	DSE	COL10A1;FAM26E;NT5DC1;TSPYL1;TSPYL4
rs13194714	LDL	6	116394819	T	A	0.62058	0.0169	0.0013	37.9124	31.9122	0.2567	na	na	na	FRK;NT5DC1;COL10A1;TSPYL4;DSE;TSPYL1;FAM26E	FRK;NT5DC1;COL10A1;TSPYL4;DSE;TSPYL1;FAM26E	na	FRK	FRK	na	na	na	FRK	na	na	na	FRK	na	COL10A1;DSE;FAM26E;NT5DC1;TSPYL1;TSPYL4
rs9388498	LDL	6	126873423	G	T	0.803795	0.0132	0.0017	14.0871	11.1685	0.1472	na	RSPO3	RSPO3	CENPW	CENPW	na	CENPW	na	na	na	na	na	na	na	na	na	CENPW	RSPO3
rs9388498	TC	6	126873423	G	T	0.800869	0.0144	0.0016	18.6464	13.8266	0.1791	na	na	na	CENPW	CENPW	na	CENPW	na	na	na	na	na	na	na	na	na	CENPW	na
rs2800708	HDL	6	127437617	C	T	0.458328	0.0185	0.0012	52.898	42.1866	0.1462	na	na	na	RSPO3;RNF146	RSPO3	na	RSPO3	na	na	na	na	na	na	na	na	na	RSPO3	RNF146
rs141783576	nonHDL	6	127439897	G	C	0.929488	-0.039	0.0035	28.1102	24.1305	0.2274	na	RSPO3	RSPO3	RSPO3;RNF146	RSPO3	na	RSPO3	na	na	na	na	na	na	na	na	RSPO3	na	RNF146
rs577721086	logTG	6	127440047	C	T	0.048885	0.0527	0.0031	64.0856	57.0525	0.002156	na	RSPO3	RSPO3	RSPO3;RNF146	RSPO3	na	RSPO3	na	na	na	na	na	na	na	na	RSPO3	na	RNF146
rs9388766	logTG	6	130354855	C	T	0.697063	0.0115	0.0013	18.0429	16.2708	0.0005135	na	na	na	L3MBTL3	L3MBTL3	na	L3MBTL3	L3MBTL3	na	na	na	L3MBTL3	na	na	na	L3MBTL3	na	na
rs4895864	nonHDL	6	130364482	C	T	0.418632	-0.0121	0.0015	15.1412	13.0713	0.01446	na	na	na	L3MBTL3	L3MBTL3	na	L3MBTL3	na	L3MBTL3	na	na	na	na	na	na	L3MBTL3	na	na
rs11407151	LDL	6	130367863	TA	T	0.645349	0.0092	0.0014	10.3025	10.0473	0.0006563	na	na	na	L3MBTL3	L3MBTL3	na	L3MBTL3	na	L3MBTL3	na	na	na	na	na	na	L3MBTL3	na	na
rs3890746	TC	6	130371055	C	T	0.435981	-0.0089	0.0012	12.9204	9.80592	0.09495	na	na	na	L3MBTL3	L3MBTL3	na	L3MBTL3	na	L3MBTL3	na	na	na	na	na	na	L3MBTL3	na	na
rs2245133	HDL	6	131931092	C	T	0.182791	-0.0141	0.0016	17.9123	13.0196	0.2369	na	ARG1;MED23	MED23;ARG1	na	na	na	MED23	ARG1;MED23;ENPP3	na	CTAGE9	na	ARG1;MED23	na	na	na	MED23	ARG1	ENPP3
rs7776054	LDL	6	135418916	G	A	0.258886	-0.0245	0.0014	67.8438	63.4458	3.16e-07	na	na	na	HBS1L;MYB	HBS1L	ALDH8A1	HBS1L	na	na	HBS1L	na	na	na	na	na	na	HBS1L	ALDH8A1;MYB
rs7776054	nonHDL	6	135418916	G	A	0.262694	-0.0254	0.0017	49.75	45.2659	0.000932	na	na	na	HBS1L;MYB	HBS1L	ALDH8A1	HBS1L	na	na	HBS1L	na	na	na	na	na	na	HBS1L	ALDH8A1;MYB
rs7776054	TC	6	135418916	G	A	0.258495	-0.0266	0.0014	79.7682	79.4332	4.88e-10	na	na	na	ALDH8A1;HBS1L;MYB	HBS1L;MYB	MYB	HBS1L	na	na	HBS1L	MYB	na	na	na	na	na	HBS1L;MYB	ALDH8A1
rs7758845	HDL	6	135428537	C	A	0.282174	-0.0116	0.0014	15.9303	12.0726	0.8531	na	na	na	HBS1L;MYB	HBS1L	AHI1	HBS1L	na	na	HBS1L	na	na	na	na	na	na	HBS1L	AHI1;MYB
rs6924387	HDL	6	137082948	G	A	0.429425	-0.0127	0.0013	21.8164	17.3899	0.7214	na	MAP3K5	MAP3K5	RP3-406A7.7	RP3-406A7.7	BCLAF1	MAP3K5	MAP3K5	IL20RA	PEX7	na	MAP3K5	na	na	na	MAP3K5	na	BCLAF1;IL20RA;RP3-406A7.7
rs2750415	HDL	6	139261477	G	A	0.185258	0.0141	0.0016	17.9123	14.0838	0.09139	na	na	na	REPS1;ABRACL;CITED2	REPS1;ABRACL	CITED2	REPS1	REPS1	na	na	CITED2	REPS1	na	na	na	REPS1	CITED2	ABRACL
rs62441843	LDL	6	139331253	G	A	0.167753	0.0206	0.0017	33.0697	26.373	0.8056	na	na	na	REPS1;ABRACL;CITED2	REPS1;ABRACL	na	ABRACL	na	na	na	na	na	na	na	na	na	ABRACL	CITED2;REPS1
rs62441843	nonHDL	6	139331253	G	A	0.162455	0.0204	0.002	23.7027	18.0049	0.4518	na	CITED2	na	REPS1;ABRACL;CITED2	REPS1	na	ABRACL	REPS1	na	na	na	REPS1	na	na	na	na	ABRACL;CITED2;REPS1	na
rs62441843	TC	6	139331253	G	A	0.16226	0.0199	0.0017	30.9248	26.1603	0.5891	na	na	na	ECT2L;REPS1;ABRACL;CITED2	REPS1	na	ABRACL	REPS1;ABRACL	na	na	na	REPS1	na	na	na	ABRACL	REPS1	CITED2;ECT2L
rs635769	LDL	6	139831981	C	T	0.599095	-0.0083	0.0013	9.7649	8.57592	0.01265	na	ABRACL	na	ABRACL;CITED2	ABRACL	na	CITED2	CITED2	na	na	na	CITED2	na	na	na	CITED2	ABRACL	na
rs2982521	nonHDL	6	139835329	T	A	0.584168	-0.0174	0.0015	30.385	25.1193	0.2252	na	na	na	ABRACL;CITED2	na	na	CITED2	CITED2	na	na	na	CITED2	na	na	na	CITED2	na	ABRACL
rs2982521	TC	6	139835329	T	A	0.58183	-0.0091	0.0012	13.4726	9.54065	0.284	na	ABRACL	na	ABRACL;CITED2	na	na	CITED2	CITED2	na	na	na	CITED2	na	na	na	CITED2	ABRACL	na
rs17585887	HDL	6	139835498	C	T	0.547249	0.0201	0.0012	62.247	48.0869	0.5237	na	na	na	ABRACL;CITED2	ABRACL	CITED2	CITED2	CITED2	na	na	CITED2	CITED2	na	na	CITED2	na	na	ABRACL
rs17585887	logTG	6	139835498	C	T	0.554377	-0.0255	0.0012	99.4819	80.7405	0.2816	na	na	na	CITED2;LINC01625;RP3-332B22.1	na	CITED2	CITED2	CITED2	na	na	CITED2	CITED2	na	na	CITED2	na	na	LINC01625;RP3-332B22.1
rs36126113	logTG	6	140360260	T	A	0.791694	0.0123	0.0016	13.8238	10.994	0.1171	na	na	na	RP3-332B22.1	na	na	na	na	na	na	na	na	na	na	na	na	na	RP3-332B22.1
rs9399414	TC	6	143268110	G	C	0.702178	0.0096	0.0013	12.8156	8.67277	0.4534	na	na	na	HIVEP2	HIVEP2	na	HIVEP2	na	na	na	na	na	na	na	na	na	HIVEP2	na
rs9480534	LDL	6	151015562	G	A	0.0869519	-0.0147	0.0022	10.6271	7.6625	0.1686	na	na	na	na	na	na	PLEKHG1	na	na	na	na	na	na	na	na	na	na	PLEKHG1
rs1871859	LDL	6	151898506	C	T	0.838437	-0.0167	0.0018	19.7618	16.6792	0.1179	na	na	na	CCDC170	CCDC170	ESR1	CCDC170	na	na	ESR1	na	na	na	na	na	na	CCDC170	ESR1
rs1871859	nonHDL	6	151898506	C	T	0.833789	-0.0169	0.0021	15.0736	13.4011	0.005128	na	na	na	CCDC170	CCDC170	ESR1	CCDC170	na	na	ESR1	na	na	na	na	na	na	CCDC170	ESR1
rs1871859	TC	6	151898506	C	T	0.838686	-0.0185	0.0017	26.8542	22.6004	0.04582	na	na	na	CCDC170	CCDC170	ESR1	CCDC170	na	na	ESR1	na	na	na	na	na	na	CCDC170	ESR1
rs17710008	LDL	6	153043035	G	A	0.839597	-0.0109	0.0017	9.84211	7.44823	0.4184	na	na	na	na	na	na	MYCT1	na	MYCT1;SYNE1	na	na	na	na	na	na	na	MYCT1	SYNE1
rs1281951	HDL	6	153462557	G	A	0.378362	0.0137	0.0013	25.2409	19.7393	0.4486	na	na	na	na	na	na	RGS17	na	na	na	na	na	na	na	na	na	na	RGS17
rs685162	logTG	6	153463135	C	A	0.614475	0.0096	0.0013	12.8156	10.6288	0.278	na	na	na	RGS17	RGS17	na	RGS17	na	na	na	na	na	na	na	na	na	RGS17	na
rs2297359	LDL	6	160492613	C	T	0.0273523	0.0662	0.0039	63.8957	85.9293	1.87e-30	na	na	na	IGF2R;SLC22A1;SLC22A2;SLC22A3;LPA	IGF2R;SLC22A1;SLC22A3;LPA	IGF2R	IGF2R	na	LPA	SOD2	IGF2R	na	na	na	na	IGF2R	LPA	SLC22A1;SLC22A2;SLC22A3
rs78425119	logTG	6	160501825	G	A	0.940075	-0.0338	0.0027	35.2282	28.8062	0.4583	na	na	na	IGF2R;SLC22A1;SLC22A2;SLC22A3;LPA	IGF2R;SLC22A1;SLC22A3;LPA	IGF2R	IGF2R	IGF2R	na	SOD2	IGF2R	IGF2R	na	na	IGF2R	na	na	LPA;SLC22A1;SLC22A2;SLC22A3
rs78425119	nonHDL	6	160501825	G	A	0.939421	-0.0595	0.0032	76.4425	68.2192	0.7619	na	na	na	IGF2R;SLC22A1;SLC22A2;SLC22A3;LPA	IGF2R;SLC22A1;SLC22A3;LPA	IGF2R	IGF2R	IGF2R	LPA	SOD2	IGF2R	IGF2R	na	na	IGF2R	na	LPA	SLC22A1;SLC22A2;SLC22A3
rs78425119	TC	6	160501825	G	A	0.941962	-0.0483	0.0026	76.3062	64.9054	0.7598	na	na	na	MRPL18;IGF2R;SLC22A1;SLC22A2;SLC22A3;LPA	MRPL18;IGF2R;SLC22A1;SLC22A3;LPA	IGF2R	IGF2R	IGF2R	na	SOD2	IGF2R	IGF2R	na	na	IGF2R	na	na	LPA;MRPL18;SLC22A1;SLC22A2;SLC22A3
rs55730499	TC	6	161005610	C	T	0.93497	-0.1004	0.0026	325.484	302.215	0.05813	na	na	na	IGF2R;SLC22A1;SLC22A2;SLC22A3;LPA;RP1-81D8.3;PLG;RP11-235G24.1;MAP3K4	IGF2R;SLC22A1;SLC22A3;LPA;RP1-81D8.3;PLG;MAP3K4	IGF2R	LPA	LPA;PLG	na	na	IGF2R	LPA;PLG	na	na	na	LPA	IGF2R;PLG	MAP3K4;RP1-81D8.3;RP11-235G24.1;SLC22A1;SLC22A2;SLC22A3
rs41272086	HDL	6	161008646	G	A	0.9074	0.057	0.0023	134.86	128.437	0.04034	na	na	na	IGF2R;SLC22A1;SLC22A2;SLC22A3;LPA;RP1-81D8.3;PLG;RP11-235G24.1;MAP3K4	IGF2R;SLC22A1;SLC22A3;LPA;RP1-81D8.3;PLG	IGF2R	LPA	LPA;PLG	na	na	IGF2R	LPA;PLG	na	na	na	LPA	IGF2R;PLG	MAP3K4;RP1-81D8.3;RP11-235G24.1;SLC22A1;SLC22A2;SLC22A3
rs41272086	logTG	6	161008646	G	A	0.907163	-0.0378	0.0022	65.4397	55.9015	0.06355	na	na	na	IGF2R;SLC22A1;SLC22A2;SLC22A3;LPA;RP1-81D8.3;PLG	IGF2R;SLC22A1;SLC22A3;LPA;RP1-81D8.3;PLG	IGF2R	LPA	LPA;PLG	na	na	IGF2R	LPA;PLG	na	na	na	LPA	IGF2R;PLG	RP1-81D8.3;SLC22A1;SLC22A2;SLC22A3
rs10455872	LDL	6	161010118	G	A	0.0642386	0.1137	0.0027	386.8	366.047	0.9137	na	na	na	IGF2R;SLC22A1;SLC22A2;SLC22A3;LPA;RP1-81D8.3;PLG;RP11-235G24.1;MAP3K4	IGF2R;SLC22A1;SLC22A3;LPA;RP1-81D8.3;PLG	PLG	LPA	LPA;PLG	LPA	na	PLG	LPA;PLG	na	na	LPA	PLG	na	IGF2R;MAP3K4;RP1-81D8.3;RP11-235G24.1;SLC22A1;SLC22A2;SLC22A3
rs10455872	nonHDL	6	161010118	G	A	0.066476	0.1049	0.0032	234.963	219.916	0.7136	na	na	na	IGF2R;SLC22A1;SLC22A2;SLC22A3;LPA;RP1-81D8.3;PLG;RP11-235G24.1;MAP3K4	IGF2R;SLC22A1;SLC22A3;LPA;RP1-81D8.3	IGF2R	LPA	PLG;LPA	LPA	na	IGF2R	PLG;LPA	na	na	LPA	na	IGF2R;PLG	MAP3K4;RP1-81D8.3;RP11-235G24.1;SLC22A1;SLC22A2;SLC22A3
rs1464780	logTG	6	161520837	G	A	0.047816	-0.0229	0.003	13.6406	9.49502	0.6436	na	na	na	LPA;RP1-81D8.3;PLG;AGPAT4	LPA;RP1-81D8.3;PLG	PLG	MAP3K4	MAP3K4	MAP3K4	AGPAT4	PLG	MAP3K4	na	na	na	MAP3K4	PLG	AGPAT4;LPA;RP1-81D8.3
rs147829643	HDL	6	161588372	C	T	0.96567	0.0301	0.0037	15.3857	10.8027	0.7115	na	na	na	RP1-81D8.3;PLG;RP11-235G24.1;MAP3K4	RP1-81D8.3;PLG	PARK2	AGPAT4	na	na	AGPAT4	na	na	na	na	na	na	na	AGPAT4;MAP3K4;PARK2;PLG;RP1-81D8.3;RP11-235G24.1
rs148349043	LDL	6	161659369	G	C	0.0128442	0.0861	0.006	45.9725	40.5123	0.1159	na	na	na	PLG;RP11-235G24.1;MAP3K4	PLG	PLG	AGPAT4	na	na	AGPAT4	PLG	na	na	na	na	na	PLG	AGPAT4;MAP3K4;RP11-235G24.1
rs148349043	nonHDL	6	161659369	G	C	0.0130935	0.0805	0.0073	27.5499	23.4223	0.5264	na	na	na	PLG;RP11-235G24.1;MAP3K4	na	PLG	AGPAT4	MAP3K4	na	AGPAT4	PLG	MAP3K4	na	na	na	na	MAP3K4;PLG	AGPAT4;RP11-235G24.1
rs148349043	TC	6	161659369	G	C	0.0129269	0.0722	0.0058	34.845	29.1402	0.1831	na	na	na	PLG;RP11-235G24.1;MAP3K4	PLG;MAP3K4	PLG	AGPAT4	MAP3K4	na	AGPAT4	PLG	MAP3K4	na	na	na	na	MAP3K4;PLG	AGPAT4;RP11-235G24.1
rs13191362	HDL	6	163033350	G	A	0.109728	0.0133	0.002	10.533	8.74226	0.2209	na	PACRG	PACRG	na	na	PARK2	PARK2	na	na	na	PARK2	na	na	na	na	na	PARK2	PACRG
rs7761309	HDL	6	163745049	G	A	0.472493	-0.0111	0.0013	16.8664	13.3112	0.1906	na	na	na	na	na	QKI	PACRG	na	na	na	na	na	na	na	na	na	na	PACRG;QKI
rs73029263	logTG	6	164113762	G	A	0.126262	-0.0177	0.0019	19.917	15.7018	0.581	na	na	na	na	na	QKI	QKI	na	na	na	QKI	na	na	na	na	na	QKI	na
rs10233430	HDL	7	1051664	C	T	0.43124	-0.0171	0.0013	38.7912	35.8125	0.02639	na	AC073957.1;GPR146;GPER1;COX19;ADAP1;CYP2W1	CYP2W1	ADAP1;COX19;CYP2W1;C7orf50;GPR146;GPER1	COX19;CYP2W1;C7orf50;GPR146;GPER1	PDGFA	C7orf50	GPR146	RP11-449P15.1;C7orf50;GPR146	GPR146	na	GPR146	na	na	GPR146	C7orf50	ADAP1;COX19;CYP2W1;GPER1	AC073957.1;PDGFA;RP11-449P15.1
rs2362529	LDL	7	1067906	C	T	0.214019	-0.0212	0.0015	44.6259	37.2539	0.1644	na	na	na	ADAP1;COX19;CYP2W1;C7orf50;GPR146;GPER1	COX19;CYP2W1;C7orf50;GPR146;GPER1	MICALL2	C7orf50	GPR146	na	GPR146	na	GPR146	na	na	na	na	C7orf50;GPR146	ADAP1;COX19;CYP2W1;GPER1;MICALL2
rs2362529	nonHDL	7	1067906	C	T	0.211837	-0.0184	0.0018	23.8022	19.1564	0.3652	na	GET4	na	ADAP1;COX19;CYP2W1;C7orf50;GPR146;GPER1	CYP2W1;C7orf50;GPR146;GPER1	CYP2W1	C7orf50	GPR146	na	GPR146	CYP2W1	GPR146	na	na	na	na	C7orf50;CYP2W1;GPR146	ADAP1;COX19;GET4;GPER1
rs2362529	TC	7	1067906	C	T	0.214	-0.0232	0.0015	53.2347	48.4219	0.03804	na	C7orf50	na	ADAP1;COX19;CYP2W1;C7orf50;GPR146;GPER1	COX19;CYP2W1;C7orf50;GPR146;GPER1	INTS1	C7orf50	GPR146	na	GPR146	na	GPR146	na	na	na	C7orf50	GPR146	ADAP1;COX19;CYP2W1;GPER1;INTS1
rs144787122	HDL	7	2296552	G	A	0.0034229	0.0882	0.0122	12.3145	8.8434	0.7136	na	na	na	GNA12	na	EIF3B	SNX8	na	SNX8	na	na	na	na	na	na	na	SNX8	EIF3B;GNA12
rs144787122	LDL	7	2296552	G	A	0.003438	0.11	0.0121	19.0078	15.2408	0.4377	na	na	na	GNA12	na	BRAT1	SNX8	na	SNX8	na	na	na	na	na	na	na	SNX8	BRAT1;GNA12
rs144787122	nonHDL	7	2296552	G	A	0.00361723	0.0986	0.015	10.308	7.37078	0.6865	na	na	na	na	na	SNX8	SNX8	na	SNX8	na	SNX8	na	na	na	na	SNX8	na	na
rs144787122	TC	7	2296552	G	A	0.00343651	0.1177	0.0118	22.7057	18.1698	0.4718	na	na	na	GNA12	na	TTYH3	SNX8	na	SNX8	na	na	na	na	na	na	na	SNX8	GNA12;TTYH3
rs852424	logTG	7	5567596	C	T	0.668512	-0.0088	0.0013	10.8878	8.3209	0.04582	na	AC092171.2	na	FBXL18;ACTB	na	ACTB	ACTB	ACTB	na	ACTB	ACTB	ACTB	na	na	ACTB	na	na	AC092171.2;FBXL18
rs79949326	HDL	7	6461310	C	T	0.755632	-0.0273	0.0014	83.9595	66.5875	0.6008	na	na	na	KDELR2	KDELR2	KDELR2	DAGLB	KDELR2;RAC1	na	CYTH3;DAGLB;ZDHHC4	KDELR2	KDELR2	na	na	na	KDELR2	na	DAGLB;RAC1
rs79949326	TC	7	6461310	C	T	0.755855	-0.0154	0.0014	27.4178	21.4842	0.8413	na	na	na	AC004895.4;FAM220A;RAC1;DAGLB;KDELR2	FAM220A;RAC1;DAGLB;KDELR2	KDELR2	DAGLB	KDELR2;RAC1	na	CYTH3;DAGLB;ZDHHC4	KDELR2	KDELR2;RAC1	na	na	na	KDELR2	DAGLB;RAC1	AC004895.4;FAM220A
rs115942176	LDL	7	8471545	C	T	0.999246	-0.1261	0.039	2.91238	7.60828	8.8e-05	na	na	na	na	na	na	NXPH1	na	na	na	na	na	na	na	na	na	na	NXPH1
rs4721060	HDL	7	12267552	G	A	0.547745	0.0113	0.0012	20.332	14.4922	0.6297	na	na	na	na	na	na	TMEM106B	na	TMEM106B	na	na	na	na	na	na	na	TMEM106B	na
rs34046032	logTG	7	12268082	C	CTTAA	0.451816	0.0095	0.0013	12.5658	10.3906	0.01274	na	na	na	TMEM106B	TMEM106B	na	TMEM106B	na	TMEM106B	na	na	na	na	na	na	TMEM106B	na	na
rs38189	HDL	7	15903403	T	A	0.618071	0.0088	0.0013	10.8878	8.44452	0.1705	na	na	na	na	na	na	MEOX2	na	na	na	na	na	na	na	na	na	na	MEOX2
rs38205	logTG	7	15913588	C	A	0.61836	-0.0115	0.0013	18.0429	14.7339	0.06621	na	na	na	na	na	na	MEOX2	MEOX2	na	na	na	MEOX2	na	na	na	na	MEOX2	na
rs4410790	nonHDL	7	17284577	C	T	0.605925	0.0116	0.0015	13.9798	10.2197	0.2315	na	na	na	na	na	na	AHR	AHR	na	na	na	AHR	na	na	na	na	AHR	na
rs6968554	HDL	7	17287106	G	A	0.616804	-0.0116	0.0013	18.3434	13.5881	0.4682	na	na	na	na	na	AHR	AHR	AHR	na	na	AHR	AHR	na	na	na	AHR	na	na
rs2106727	logTG	7	17287998	G	A	0.614338	0.0132	0.0013	23.4968	18.1169	0.482	na	na	na	AHR;AC019117.2	AHR	AHR	AHR	AHR	na	na	AHR	AHR	na	na	AHR	na	na	AC019117.2
rs2723509	logTG	7	17817037	G	A	0.539866	-0.0132	0.0013	23.4968	18.9193	0.211	na	SNX13	na	AHR;AC019117.2;SNX13	AHR;SNX13	AHR	SNX13	na	na	na	AHR	na	na	na	na	SNX13	AHR	AC019117.2
rs10242866	HDL	7	17920613	C	T	0.57253	0.0248	0.0013	80.4059	71.9796	0.1243	na	na	na	na	na	na	SNX13	SNX13	na	na	na	SNX13	na	na	na	na	SNX13	na
rs10242866	TC	7	17920613	C	T	0.572397	0.011	0.0012	19.3117	16.4588	0.0004109	na	SNX13	na	SNX13	SNX13	na	SNX13	SNX13	na	na	na	SNX13	na	na	SNX13	na	na	na
rs55696093	LDL	7	21605973	G	A	0.198834	0.0367	0.0016	115.707	107.899	0.1638	na	na	na	SP4;DNAH11	SP4;DNAH11	na	DNAH11	na	na	na	na	na	na	na	na	na	DNAH11	SP4
rs55696093	logTG	7	21605973	G	A	0.198458	0.0109	0.0016	11.0181	9.06552	0.17	na	na	na	SP4;DNAH11	SP4	na	DNAH11	na	na	na	na	na	na	na	na	na	DNAH11	SP4
rs55696093	nonHDL	7	21605973	G	A	0.208576	0.0381	0.0018	98.7127	89.361	0.04564	na	na	na	SP4;DNAH11	SP4;DNAH11	na	DNAH11	na	na	na	na	na	na	na	na	na	DNAH11	SP4
rs55696093	TC	7	21605973	G	A	0.203631	0.0357	0.0015	124.476	112.018	0.2093	na	na	na	SP4;DNAH11	SP4;DNAH11	na	DNAH11	na	na	na	na	na	na	na	na	na	DNAH11	SP4
rs4722551	LDL	7	25991826	C	T	0.147305	0.0354	0.0018	85.3806	79.6585	0.2224	na	na	na	CTD-2227E11.1;NFE2L3;AC004540.5	CTD-2227E11.1;NFE2L3;AC004540.5	na	NFE2L3	na	na	na	na	na	na	na	na	na	NFE2L3	AC004540.5;CTD-2227E11.1
rs4722551	logTG	7	25991826	C	T	0.147439	-0.0277	0.0017	58.9639	48.6623	0.1591	na	na	na	AC003090.1;CTD-2227E11.1;CBX3;SNX10;AC004540.5	CTD-2227E11.1;CBX3;SNX10;AC004540.5	CBX3	NFE2L3	na	na	na	CBX3	na	na	na	na	na	CBX3	AC003090.1;AC004540.5;CTD-2227E11.1;NFE2L3;SNX10
rs4722551	nonHDL	7	25991826	C	T	0.148679	0.0248	0.0021	31.4578	26.8206	0.1113	na	na	na	CTD-2227E11.1	CTD-2227E11.1	na	NFE2L3	na	na	na	na	na	na	na	na	na	na	CTD-2227E11.1;NFE2L3
rs4722551	TC	7	25991826	C	T	0.147518	0.0258	0.0017	51.2956	44.1956	0.05249	na	na	na	CTD-2227E11.1	CTD-2227E11.1	na	NFE2L3	na	na	na	na	na	na	na	na	na	na	CTD-2227E11.1;NFE2L3
rs1534696	HDL	7	26397239	C	A	0.424046	-0.0154	0.0013	31.6472	26.7431	0.1346	na	SNX10;CBX3	CBX3;SNX10	CTD-2227E11.1;NFE2L3;AC004540.5	CTD-2227E11.1;NFE2L3;AC004540.5	CBX3	SNX10	na	na	na	CBX3	na	na	na	na	na	CBX3;SNX10	AC004540.5;CTD-2227E11.1;NFE2L3
rs864745	logTG	7	28180556	C	T	0.45819	-0.0094	0.0012	14.3232	10.4789	0.1697	na	JAZF1	JAZF1	JAZF1	JAZF1	na	JAZF1	na	na	na	na	na	na	na	na	JAZF1	na	na
rs3735569	LDL	7	28215361	G	C	0.889802	-0.0164	0.002	15.6191	11.1499	0.1837	na	na	na	JAZF1	JAZF1	na	JAZF1	na	CREB5	na	na	na	na	na	na	na	JAZF1	CREB5
rs3735569	nonHDL	7	28215361	G	C	0.873943	-0.018	0.0023	14.2982	11.0775	0.3663	na	na	na	JAZF1	JAZF1	na	JAZF1	na	CREB5	na	na	na	na	na	na	na	JAZF1	CREB5
rs3735569	TC	7	28215361	G	C	0.876534	-0.0149	0.0019	14.3535	10.9547	0.2295	na	na	na	JAZF1	JAZF1	na	JAZF1	na	CREB5	na	na	na	na	na	na	na	JAZF1	CREB5
rs71553019	HDL	7	35671204	C	CATATATAAATATATATAA	0.316885	-0.0101	0.0015	10.7804	7.53712	0.9505	na	AC006960.3;EEPD1	na	HERPUD2	na	na	HERPUD2	na	na	na	na	na	na	na	na	na	HERPUD2	AC006960.3;EEPD1
rs34578041	TC	7	36170409	C	T	0.43029	0.0112	0.0012	19.9889	15.5344	0.1052	na	na	na	EEPD1;ANLN	EEPD1	na	EEPD1	EEPD1	ANLN	na	na	EEPD1	na	na	na	EEPD1	ANLN	na
rs12533280	LDL	7	36171953	C	T	0.804758	-0.0168	0.0016	25.0636	20.6137	0.5356	na	EEPD1	EEPD1	HERPUD2;EEPD1;ANLN	EEPD1	na	EEPD1	EEPD1	na	na	na	EEPD1	na	na	EEPD1	na	na	ANLN;HERPUD2
rs11771125	nonHDL	7	36190426	C	T	0.816569	-0.0187	0.0019	22.1299	18.5931	0.2002	na	EEPD1	EEPD1	EEPD1;ANLN	EEPD1	na	EEPD1	EEPD1	na	na	na	EEPD1	na	na	EEPD1	na	na	ANLN
rs12533197	HDL	7	36192606	G	T	0.42146	-0.0156	0.0013	32.4494	26.759	0.6837	na	EEPD1	na	HERPUD2;EEPD1;ANLN	EEPD1	na	EEPD1	EEPD1	na	na	na	EEPD1	na	na	EEPD1	na	na	ANLN;HERPUD2
rs138994411	HDL	7	38265179	C	CTTGAAAAGACAACCTTTCCCCATTGTACTGAT	0.468714	0.0143	0.0013	27.4178	21.5199	0.03887	na	TRGV9	na	na	na	na	STARD3NL	na	na	na	na	na	na	na	na	na	na	STARD3NL;TRGV9
rs7808613	LDL	7	41746922	G	C	0.234947	0.0113	0.0015	13.3057	9.35817	0.5324	na	na	na	na	na	na	INHBA	na	na	na	na	na	na	na	na	na	na	INHBA
rs7808613	nonHDL	7	41746922	G	C	0.24289	0.013	0.0017	13.6869	9.56932	0.3415	na	na	na	na	na	na	INHBA	na	na	na	na	na	na	na	na	na	na	INHBA
rs995124	TC	7	41764992	C	T	0.765419	-0.0113	0.0014	15.1581	10.0394	0.9798	na	na	na	na	na	na	INHBA	na	na	na	na	na	na	na	na	na	na	INHBA
rs2070971	logTG	7	44197583	G	T	0.834384	-0.0254	0.0017	49.75	44.1849	0.00604	na	na	na	AEBP1;MYL7;GCK;YKT6;NUDCD3;DDX56	MYL7;YKT6;NUDCD3	GCK	GCK	na	na	AEBP1;GCK;NPC1L1	GCK	na	na	na	na	GCK	na	AEBP1;DDX56;MYL7;NUDCD3;YKT6
rs17725246	LDL	7	44581986	C	T	0.210629	0.0377	0.0016	122.029	122.745	1.16e-10	na	TMED4;NPC1L1	na	CAMK2B;NUDCD3;NPC1L1;DDX56;TMED4;OGDH	NUDCD3;NPC1L1;DDX56;TMED4;OGDH	OGDH	NPC1L1	NPC1L1	NPC1L1	AEBP1;GCK;NPC1L1	OGDH	NPC1L1	na	NPC1L1	na	na	OGDH;TMED4	CAMK2B;DDX56;NUDCD3
rs17725246	nonHDL	7	44581986	C	T	0.2122	0.0394	0.0019	94.7927	98.9149	8.69e-11	na	TMED4;NPC1L1	na	GCK;YKT6;CAMK2B;NUDCD3;NPC1L1;DDX56;TMED4;OGDH	NUDCD3;NPC1L1;DDX56;TMED4;OGDH	OGDH	NPC1L1	NPC1L1	NPC1L1	AEBP1;GCK;NPC1L1	OGDH	NPC1L1	na	NPC1L1	na	na	OGDH;TMED4	CAMK2B;DDX56;GCK;NUDCD3;YKT6
rs17725246	TC	7	44581986	C	T	0.210531	0.0349	0.0015	119.016	111.63	7.33e-11	na	TMED4;NPC1L1	na	GCK;YKT6;CAMK2B;NUDCD3;NPC1L1;DDX56;TMED4;OGDH	NUDCD3;NPC1L1;DDX56;TMED4;OGDH	OGDH	NPC1L1	NPC1L1	NPC1L1;GCK	AEBP1;GCK;NPC1L1	OGDH	NPC1L1	na	NPC1L1	na	na	GCK;OGDH;TMED4	CAMK2B;DDX56;NUDCD3;YKT6
rs876038	TC	7	50308527	C	T	0.695446	-0.0085	0.0013	10.2065	9.22032	0.001482	na	na	na	na	na	IKZF1	IKZF1	IKZF1	na	na	IKZF1	IKZF1	na	na	na	IKZF1	na	na
rs876039	HDL	7	50308811	G	C	0.697868	-0.0165	0.0013	36.1855	27.0647	0.07447	na	na	na	na	na	GRB10	IKZF1	IKZF1	na	na	na	IKZF1	na	na	na	na	IKZF1	GRB10
rs35753501	HDL	7	72330303	C	T	0.974256	-0.0304	0.0046	10.4115	7.4139	0.1145	na	na	na	NSUN5	na	POM121	POM121	MLXIPL;BAZ1B;BCL7B;TBL2;TRIM50	na	na	POM121	na	na	na	na	na	POM121	BAZ1B;BCL7B;MLXIPL;NSUN5;TBL2;TRIM50
rs799157	LDL	7	73020301	C	T	0.963357	-0.0297	0.0037	15.0006	12.9856	0.05522	na	na	na	NSUN5;VPS37D	na	MLXIPL	MLXIPL	MLXIPL	na	BAZ1B;MLXIPL	MLXIPL	MLXIPL	na	na	na	MLXIPL	na	NSUN5;VPS37D
rs799157	nonHDL	7	73020301	C	T	0.963023	-0.0618	0.0043	46.111	40.4792	0.6737	na	na	na	FZD9;BAZ1B;BCL7B;MLXIPL;VPS37D;DNAJC30;WBSCR22;STX1A	BCL7B;MLXIPL;VPS37D;DNAJC30;STX1A	MLXIPL	MLXIPL	MLXIPL	na	BAZ1B;MLXIPL	MLXIPL	MLXIPL	na	na	MLXIPL	na	na	BAZ1B;BCL7B;DNAJC30;FZD9;STX1A;VPS37D;WBSCR22
rs799157	TC	7	73020301	C	T	0.963328	-0.0403	0.0036	28.3624	23.5551	0.2783	na	na	na	BCL7B;MLXIPL;VPS37D	BCL7B;MLXIPL;VPS37D	MLXIPL	MLXIPL	MLXIPL	na	BAZ1B;MLXIPL	MLXIPL	MLXIPL	na	na	MLXIPL	na	na	BCL7B;VPS37D
rs3812316	logTG	7	73020337	G	C	0.116779	-0.1229	0.0019	910.463	808.784	0.04829	na	na	na	NSUN5;TRIM50;FKBP6;FZD9;BAZ1B;BCL7B;TBL2;MLXIPL;VPS37D;DNAJC30;WBSCR22;STX1A;CLDN3	NSUN5;TRIM50;FZD9;BAZ1B;BCL7B;TBL2;MLXIPL;VPS37D;DNAJC30;WBSCR22;STX1A	MLXIPL	MLXIPL	MLXIPL;BAZ1B;TRIM50	MLXIPL	BAZ1B;MLXIPL	MLXIPL	MLXIPL;BAZ1B;TRIM50	na	MLXIPL	na	na	BAZ1B;TRIM50	BCL7B;CLDN3;DNAJC30;FKBP6;FZD9;NSUN5;STX1A;TBL2;VPS37D;WBSCR22
rs55747707	HDL	7	73037366	G	A	0.816331	-0.0372	0.0016	118.847	102.79	0.1404	na	MLXIPL;AC005089.1	MLXIPL;AC005089.1	NSUN5;VPS37D	na	MLXIPL	MLXIPL	MLXIPL;BAZ1B;BCL7B;TBL2;TRIM50	na	BAZ1B;MLXIPL	MLXIPL	MLXIPL	na	na	MLXIPL	na	na	AC005089.1;BAZ1B;BCL7B;NSUN5;TBL2;TRIM50;VPS37D
rs112924314	HDL	7	74361240	C	T	0.942572	0.0252	0.0031	15.3638	11.7976	0.1918	na	POR	na	na	na	GTF2IRD1	GATSL1	na	na	na	na	na	na	na	na	na	na	GATSL1;GTF2IRD1;POR
rs41301394	nonHDL	7	75612803	C	T	0.704459	-0.0149	0.0016	19.9036	14.8838	0.6899	na	POR;GTF2IP7;STYXL1	POR;STYXL1	POR;TMEM120A;STYXL1;MDH2;SRRM3	POR;TMEM120A;MDH2	POR	POR	POR;TMEM120A	POR;TMEM120A	POR	POR	POR;TMEM120A	POR	na	na	TMEM120A	STYXL1	GTF2IP7;MDH2;SRRM3
rs41301394	TC	7	75612803	C	T	0.711527	-0.0117	0.0013	18.6464	13.1171	0.9714	na	POR;MDH2;GTF2IP7	na	HIP1;POR;TMEM120A;MDH2	HIP1;POR;TMEM120A;MDH2	POR	POR	POR;TMEM120A	POR;TMEM120A	POR	POR	POR;TMEM120A	POR	na	na	TMEM120A	MDH2	GTF2IP7;HIP1
rs2302429	LDL	7	75614777	G	A	0.808925	-0.0125	0.0016	14.2513	11.0561	0.1878	na	TMEM120A;POR	POR	HIP1;POR;TMEM120A;MDH2;SRRM3	HIP1;POR;TMEM120A;MDH2	POR	POR	POR;TMEM120A	POR;TMEM120A	POR	POR	POR;TMEM120A	POR	na	TMEM120A	na	na	HIP1;MDH2;SRRM3
rs1057868	logTG	7	75615006	C	T	0.711546	-0.0124	0.0014	18.0857	13.5202	0.7352	na	CASTOR2;POR;GTF2IP7;AC005077.2	CASTOR2	SPDYE5;POR;TMEM120A;MDH2	POR;TMEM120A;MDH2	POR	POR	POR;TMEM120A	POR;TMEM120A	POR	POR	POR;TMEM120A	POR	na	na	TMEM120A	na	AC005077.2;CASTOR2;GTF2IP7;MDH2;SPDYE5
rs56400413	TC	7	77340821	T	A	0.735107	-0.0085	0.0014	8.89696	7.73051	0.01668	na	na	na	PTPN12;RSBN1L;PHTF2	PTPN12	PTPN12	RSBN1L	PTPN12	na	na	PTPN12	PTPN12	na	na	na	PTPN12	RSBN1L	PHTF2
rs3211938	HDL	7	80300449	G	T	0.0123103	0.1321	0.0084	54.9998	42.1181	0.4723	na	CD36	CD36	na	na	CD36	CD36	na	CD36	CD36	CD36	na	na	na	CD36	na	na	na
rs74705598	HDL	7	80851648	G	C	0.993532	-0.098	0.0115	16.8036	11.6983	0.7783	na	na	na	na	na	na	AC005008.2	na	na	na	na	na	na	na	na	na	na	AC005008.2
rs1229498	TC	7	81568750	G	T	0.727353	-0.0113	0.0014	15.1581	10.9077	0.7288	na	na	na	na	na	na	CACNA2D1	na	na	na	na	na	na	na	na	na	na	CACNA2D1
rs1229499	logTG	7	81573045	T	A	0.288806	0.0105	0.0014	13.1951	10.9857	0.01752	na	na	na	na	na	na	CACNA2D1	na	na	na	na	na	na	na	na	na	na	CACNA2D1
rs1468615	nonHDL	7	87074964	C	T	0.191299	-0.0128	0.0019	10.7908	7.3087	0.6193	na	na	na	ABCB4	ABCB4	ABCB4	ABCB4	ABCB4;ABCB1	ABCB4;CROT;SLC25A40;RUNDC3B	ABCB4	ABCB4	ABCB4	na	ABCB4	na	na	na	ABCB1;CROT;RUNDC3B;SLC25A40
rs1014283	LDL	7	87076587	C	A	0.791904	0.0137	0.0016	16.9568	13.6122	0.1982	na	ABCB4	na	ABCB4	ABCB4	ABCB4	ABCB4	ABCB4;ABCB1	ABCB4	ABCB4	ABCB4	ABCB4	ABCB4	na	na	na	na	ABCB1
rs1014283	TC	7	87076587	C	A	0.79183	0.0144	0.0015	21.0972	15.3765	0.4536	na	ABCB4	na	ABCB4	ABCB4	ABCB4	ABCB4	ABCB4;ABCB1	na	ABCB4	ABCB4	ABCB4	na	ABCB4	na	na	na	ABCB1
rs705379	HDL	7	94953895	G	A	0.556905	0.0091	0.0013	11.5918	9.16669	0.1518	na	PON2;PON1	PON1	na	na	PPP1R9A	PON1	PON1	PON1;PON2;GS1-293C5.1	PDK4;PON1;PON2;PON3	na	PON1	na	na	PON1	na	PON2	GS1-293C5.1;PPP1R9A
rs705379	TC	7	94953895	G	A	0.555702	0.0084	0.0012	11.5918	7.8692	0.2883	na	PON2;PON1	PON1	PON1	PON1	PON1	PON1	PON1	PON3;PON1	PDK4;PON1;PON2;PON3	PON1	PON1	PON1	na	na	na	na	PON2;PON3
rs6967728	nonHDL	7	97915637	G	A	0.804186	0.019	0.0019	22.817	17.9283	0.9405	na	AC093799.1;BRI3;BAIAP2L1;TECPR1	BRI3;AC093799.1	TECPR1;BRI3;BAIAP2L1	TECPR1;BRI3;BAIAP2L1	BRI3	BRI3	BRI3	na	na	BRI3	BRI3	na	BRI3	na	na	BAIAP2L1;TECPR1	AC093799.1
rs112758337	LDL	7	97977268	G	A	0.81387	0.0187	0.0017	27.4178	22.2736	0.6263	na	BRI3;BAIAP2L1;AC093799.1	BRI3;AC093799.1	TECPR1;BRI3;BAIAP2L1	TECPR1;BRI3	TRRAP	BAIAP2L1	BRI3	na	na	na	BRI3	na	na	na	BAIAP2L1;BRI3	na	AC093799.1;TECPR1;TRRAP
rs112758337	TC	7	97977268	G	A	0.810554	0.0173	0.0016	26.5223	21.3345	0.5149	na	AC093799.1;BAIAP2L1;BRI3	AC093799.1;BRI3	TECPR1;BRI3;BAIAP2L1	TECPR1;BRI3	TRRAP	BAIAP2L1	BRI3	na	na	na	BRI3	na	na	na	BAIAP2L1;BRI3	na	AC093799.1;TECPR1;TRRAP
rs221793	LDL	7	100280896	C	A	0.91148	-0.0287	0.0023	35.0083	30.8276	0.04547	na	GIGYF1	GIGYF1	STAG3;GATS;PVRIG;SPDYE3;PILRA;ZCWPW1;MEPCE;PPP1R35;C7orf61;TSC22D4;NYAP1;AGFG2;PCOLCE;MOSPD3;TFR2;ACTL6B;GNB2;GIGYF1;POP7;EPO;ZAN;EPHB4;SLC12A9;TRIP6;SRRT;UFSP1;ACHE;MUC3A	STAG3;SPDYE3;ZCWPW1;MEPCE;C7orf61;TSC22D4;NYAP1;MOSPD3;TFR2;ACTL6B;GNB2;GIGYF1;POP7;EPO;ZAN;SRRT;UFSP1;ACHE;MUC3A	TSC22D4	GIGYF1	TFR2;EPO;GNB2;SRRT;EPHB4	GIGYF1	PPP1R35;SERPINE1;STAG3	TSC22D4	TFR2;EPO;GNB2;SRRT;EPHB4	na	na	GIGYF1	na	EPHB4;EPO;GNB2;SRRT;TFR2;TSC22D4	ACHE;ACTL6B;AGFG2;C7orf61;GATS;MEPCE;MOSPD3;MUC3A;NYAP1;PCOLCE;PILRA;POP7;PPP1R35;PVRIG;SLC12A9;SPDYE3;STAG3;TRIP6;UFSP1;ZAN;ZCWPW1
rs221793	nonHDL	7	100280896	C	A	0.907492	-0.0288	0.0027	25.8364	23.103	0.01022	na	GIGYF1	GIGYF1	STAG3;GATS;SPDYE3;AGFG2;PCOLCE;MOSPD3;TFR2;GNB2;GIGYF1;POP7;EPO;ZAN;EPHB4;SLC12A9;TRIP6;SRRT;UFSP1;ACHE;MUC3A	MOSPD3;TFR2;GNB2;GIGYF1;POP7;EPO;ZAN;SRRT;UFSP1;ACHE;MUC3A	TFR2	GIGYF1	TFR2;GNB2;EPHB4;SRRT;GIGYF1;EPO;TRIP6	GIGYF1	PPP1R35;SERPINE1;STAG3	TFR2	TFR2;GNB2;EPHB4;SRRT;GIGYF1;EPO;TRIP6	na	GIGYF1	na	TFR2	EPHB4;EPO;GNB2;SRRT;TRIP6	ACHE;AGFG2;GATS;MOSPD3;MUC3A;PCOLCE;POP7;SLC12A9;SPDYE3;STAG3;UFSP1;ZAN
rs221793	TC	7	100280896	C	A	0.911543	-0.0273	0.0022	34.6321	29.2812	0.01791	na	GIGYF1	GIGYF1	STAG3;GATS;PVRIG;SPDYE3;PILRB;PILRA;ZCWPW1;MEPCE;PPP1R35;C7orf61;TSC22D4;NYAP1;AGFG2;PCOLCE;MOSPD3;TFR2;ACTL6B;GNB2;GIGYF1;POP7;EPO;ZAN;EPHB4;SLC12A9;TRIP6;SRRT;UFSP1;ACHE;MUC3A	STAG3;SPDYE3;PILRB;PILRA;ZCWPW1;MEPCE;C7orf61;TSC22D4;NYAP1;MOSPD3;TFR2;ACTL6B;GNB2;GIGYF1;POP7;EPO;ZAN;SLC12A9;SRRT;UFSP1;ACHE;MUC3A	TSC22D4	GIGYF1	TFR2;GNB2;SRRT;EPO;GIGYF1;EPHB4	GIGYF1	PPP1R35;SERPINE1;STAG3	TSC22D4	TFR2;GNB2;SRRT;EPO;GIGYF1;EPHB4	na	GIGYF1	na	na	EPHB4;EPO;GNB2;SRRT;TFR2;TSC22D4	ACHE;ACTL6B;AGFG2;C7orf61;GATS;MEPCE;MOSPD3;MUC3A;NYAP1;PCOLCE;PILRA;PILRB;POP7;PPP1R35;PVRIG;SLC12A9;SPDYE3;STAG3;TRIP6;UFSP1;ZAN;ZCWPW1
rs10250685	nonHDL	7	100873835	G	A	0.271121	-0.0113	0.0017	10.5243	8.38527	0.07264	na	GIGYF1	GIGYF1	ZAN;EPHB4;SLC12A9;TRIP6;SRRT;UFSP1;ACHE;MUC3A;PLOD3;ZNHIT1;CLDN15	ZAN;SRRT;UFSP1;ACHE;MUC3A;PLOD3;CLDN15	CLDN15	CLDN15	PLOD3;CLDN15	na	SERPINE1;VGF	CLDN15	PLOD3;CLDN15	na	na	CLDN15	na	PLOD3	ACHE;EPHB4;GIGYF1;MUC3A;SLC12A9;SRRT;TRIP6;UFSP1;ZAN;ZNHIT1
rs10250685	TC	7	100873835	G	A	0.276913	-0.0092	0.0013	11.8315	8.11489	0.1985	na	GIGYF1;SRRT	GIGYF1	ZAN;EPHB4;SLC12A9;TRIP6;SRRT;UFSP1;ACHE;MUC3A;PLOD3;ZNHIT1;CLDN15	ZAN;SLC12A9;SRRT;UFSP1;ACHE;MUC3A;PLOD3;ZNHIT1;CLDN15	CLDN15	CLDN15	PLOD3;CLDN15	na	SERPINE1;VGF	CLDN15	PLOD3;CLDN15	na	na	CLDN15	na	PLOD3;SRRT	ACHE;EPHB4;GIGYF1;MUC3A;SLC12A9;TRIP6;UFSP1;ZAN;ZNHIT1
rs427534	HDL	7	101886704	G	A	0.438868	0.0083	0.0013	9.7649	7.90723	0.01112	na	na	na	CUX1;SH2B2	SH2B2	CUX1	CUX1	CUX1	na	na	CUX1	CUX1	na	na	CUX1	na	na	SH2B2
rs803073	TC	7	101928279	G	A	0.546014	0.0087	0.0012	12.3801	8.03083	0.3658	na	SH2B2;CUX1;AC005096.1	AC005096.1	CUX1;SH2B2	SH2B2	CUX1	SH2B2	CUX1;SH2B2	CUX1;SH2B2	na	CUX1	CUX1;SH2B2	na	CUX1;SH2B2	na	na	na	AC005096.1
rs10264718	LDL	7	104638501	C	A	0.178687	-0.0126	0.0018	11.5918	7.96455	0.5495	na	na	na	KMT2E	KMT2E	KMT2E	KMT2E	KMT2E	na	na	KMT2E	na	na	na	KMT2E	na	na	na
rs257378	HDL	7	106801395	G	C	0.179769	0.0145	0.0016	18.8945	13.6409	0.241	na	na	na	HBP1;COG5;GPR22;DUS4L;BCAP29;SLC26A4	HBP1;COG5;SLC26A4	PRKAR2B	PRKAR2B	PRKAR2B;HBP1	COG5	PRKAR2B	PRKAR2B	HBP1;PRKAR2B	na	na	na	PRKAR2B	COG5;HBP1	BCAP29;DUS4L;GPR22;SLC26A4
rs2283038	logTG	7	106835410	C	T	0.771589	0.0098	0.0015	10.1916	8.06087	0.05773	na	na	na	PRKAR2B;COG5;GPR22;DUS4L	PRKAR2B;COG5	na	HBP1	HBP1;PRKAR2B	na	PRKAR2B	na	PRKAR2B;HBP1	na	na	na	na	HBP1;PRKAR2B	COG5;DUS4L;GPR22
rs2299421	nonHDL	7	106946195	G	C	0.320403	0.0104	0.0016	10.0952	8.14046	0.02306	na	na	na	HBP1;COG5;GPR22;DUS4L;BCAP29;SLC26A4	HBP1;COG5;SLC26A4	na	COG5	HBP1;PRKAR2B	COG5	PRKAR2B	na	HBP1	na	na	na	COG5	HBP1	BCAP29;DUS4L;GPR22;PRKAR2B;SLC26A4
rs10248717	LDL	7	107056795	G	A	0.344977	0.013	0.0014	19.7942	15.2605	0.7188	na	na	na	HBP1;COG5;GPR22;DUS4L;BCAP29;SLC26A4	HBP1;COG5;SLC26A4	PRKAR2B	COG5	HBP1;PRKAR2B	COG5;SLC26A3	PRKAR2B	na	HBP1	na	na	na	COG5	HBP1;PRKAR2B	BCAP29;DUS4L;GPR22;SLC26A3;SLC26A4
rs10248717	TC	7	107056795	G	A	0.351798	0.0091	0.0013	11.5918	7.66368	0.6176	na	na	na	HBP1;COG5;GPR22;DUS4L;BCAP29	HBP1;COG5	na	COG5	HBP1;PRKAR2B	COG5	PRKAR2B	na	HBP1	na	na	na	COG5	HBP1	BCAP29;DUS4L;GPR22;PRKAR2B
rs6970946	logTG	7	107624109	C	T	0.910955	0.0162	0.0022	12.7472	9.03502	0.8438	na	na	na	COG5;DUS4L;LAMB1	COG5;LAMB1	na	LAMB1	LAMB1	na	na	na	LAMB1	na	na	na	LAMB1	na	COG5;DUS4L
rs138340572	TC	7	116305314	C	CA	0.19447	0.0095	0.0018	6.88353	7.37161	0.001354	na	na	na	na	na	MET	MET	na	MET	CAV1	MET	na	na	na	na	MET	na	na
rs10215153	logTG	7	116399131	G	A	0.700381	-0.0113	0.0014	15.1581	12.6312	0.02065	na	MET	na	MET;CAPZA2	CAPZA2	CAV1	MET	MET	na	CAV1	na	MET	na	na	MET	na	na	CAPZA2;CAV1
rs10229792	HDL	7	116982907	G	A	0.613104	0.0122	0.0013	20.1997	15.6359	0.4748	na	CFTR;AC002066.1;WNT2	na	na	na	na	WNT2	na	na	CFTR	na	na	na	na	na	na	WNT2	AC002066.1;CFTR
rs10229792	logTG	7	116982907	G	A	0.615062	-0.0126	0.0013	21.488	17.0652	0.1379	na	WNT2;CFTR;AC002066.1	na	CAPZA2;WNT2;CFTR;ASZ1	CAPZA2;CFTR	na	WNT2	CFTR;WNT2	na	CFTR	na	CFTR;WNT2	na	na	WNT2	CFTR	na	AC002066.1;ASZ1;CAPZA2
rs62621812	LDL	7	127015083	G	A	0.978161	-0.0294	0.0045	10.1916	7.84664	0.3443	na	na	na	na	na	SND1	ZNF800	SND1;GCC1	ZNF800	na	na	na	na	na	na	na	SND1;ZNF800	GCC1
rs147138679	TC	7	130275219	G	A	0.818668	0.0094	0.0016	8.37382	8.31828	0.001102	na	COPG2;KLF14;MEST	COPG2;MEST	MEST;COPG2	na	na	COPG2	COPG2	na	na	na	COPG2	na	na	COPG2	na	MEST	KLF14
rs13234269	HDL	7	130429186	T	A	0.544614	-0.0291	0.0013	110.255	101.319	0.02846	na	KLF14	KLF14	KLF14	KLF14	MKLN1	KLF14	na	na	na	na	na	na	na	na	KLF14	na	MKLN1
rs13234269	logTG	7	130429186	T	A	0.540342	0.0245	0.0013	78.5003	73.1955	0.03433	na	na	na	KLF14;AC016831.7	KLF14	MKLN1	KLF14	na	na	na	na	na	na	na	na	na	KLF14	AC016831.7;MKLN1
rs13241165	nonHDL	7	130432538	T	A	0.469663	-0.0156	0.0015	24.6057	20.9464	0.207	na	na	na	KLF14;AC016831.7	KLF14	na	KLF14	na	na	na	na	na	na	na	na	na	KLF14	AC016831.7
rs6467314	LDL	7	130442141	G	C	0.312969	0.0099	0.0014	11.8143	9.92308	0.03501	na	na	na	KLF14;AC016831.7	KLF14	na	KLF14	na	na	na	na	na	na	na	na	na	KLF14	AC016831.7
rs73729085	HDL	7	137561861	G	A	0.0115655	-0.0511	0.0068	13.2438	8.68426	0.7073	na	na	na	na	na	CREB3L2	CREB3L2	na	na	DGKI	CREB3L2	na	na	na	na	na	CREB3L2	na
rs73729085	LDL	7	137561861	G	A	0.0114349	-0.0755	0.007	26.3957	21.1035	0.2467	na	na	na	na	na	AKR1D1	CREB3L2	na	na	DGKI	na	na	na	na	na	na	na	AKR1D1;CREB3L2
rs73729085	TC	7	137561861	G	A	0.0112227	-0.0815	0.0067	33.3167	26.7677	0.6031	na	na	na	na	na	AKR1D1	CREB3L2	na	na	DGKI	na	na	na	na	na	na	na	AKR1D1;CREB3L2
rs10273527	HDL	7	139036598	G	T	0.717034	-0.0106	0.0015	11.7994	9.03955	0.3633	na	C7orf55-LUC7L2	na	na	na	HIPK2	C7orf55-LUC7L2	LUC7L2	C7orf55-LUC7L2;C7orf55-LUC7L2;LUC7L2	KIAA1549	na	LUC7L2	na	na	C7orf55-LUC7L2	na	LUC7L2	HIPK2
rs6949316	logTG	7	149180625	G	C	0.246881	-0.0091	0.0015	8.88408	7.45416	0.04685	na	na	na	ZNF746;KRBA1	na	ZNF467	ZNF746	ZNF746	na	PDIA4	na	ZNF746	na	na	na	ZNF746	na	KRBA1;ZNF467
rs7808446	logTG	7	150214465	G	T	0.76031	-0.014	0.0015	19.9889	18.5429	0.01094	na	AOC1	AOC1	GIMAP7;GIMAP6;GIMAP2;AOC1;KCNH2	GIMAP7;AOC1	GIMAP5	GIMAP7	na	GIMAP7	GIMAP6;NOS3;RARRES2	na	na	na	na	na	GIMAP7	AOC1	GIMAP2;GIMAP5;GIMAP6;KCNH2
rs62492368	HDL	7	150537635	G	A	0.646893	0.0155	0.0013	32.0471	26.8099	0.02276	na	AOC1	AOC1	na	na	REPIN1	AOC1	na	na	GIMAP6;NOS3;RARRES2	na	na	na	na	na	na	AOC1	REPIN1
rs10279638	nonHDL	7	155024830	G	A	0.888215	-0.0213	0.0025	16.7971	12.8129	0.7509	na	na	na	AC144652.1	AC144652.1	INSIG1	AC099552.4	INSIG1	na	INSIG1	na	na	na	na	na	na	INSIG1	AC099552.4;AC144652.1
rs10279638	TC	7	155024830	G	A	0.895248	-0.0207	0.0021	22.1949	17.6982	0.5071	na	na	na	AC144652.1	AC144652.1	INSIG1	AC099552.4	INSIG1	na	INSIG1	na	na	na	na	na	na	INSIG1	AC099552.4;AC144652.1
rs4374942	LDL	7	155026807	C	T	0.105817	0.0188	0.0021	18.4586	13.4856	0.8502	na	na	na	AC144652.1	AC144652.1	INSIG1	AC099552.4	INSIG1	na	INSIG1	na	na	na	na	na	na	INSIG1	AC099552.4;AC144652.1
rs12538001	TC	7	158511941	C	T	0.677968	-0.0079	0.0013	8.91183	7.8848	0.01122	na	na	na	ESYT2	ESYT2	ESYT2	ESYT2	na	na	na	ESYT2	na	na	na	na	ESYT2	na	na
rs11977408	nonHDL	7	158583806	C	T	0.898578	-0.0153	0.0027	7.83683	7.47654	0.0145	na	na	na	ESYT2	na	na	ESYT2	na	na	na	na	na	na	na	na	na	ESYT2	na
rs13271435	logTG	8	4780903	G	A	0.685257	0.0094	0.0014	10.7236	8.00444	0.4131	na	na	na	na	na	na	CSMD1	na	na	na	na	na	na	na	na	na	na	CSMD1
rs2928576	LDL	8	6600349	C	T	0.694841	0.0114	0.0014	15.4133	12.0129	0.6276	na	AGPAT5;ANGPT2	na	ANGPT2;AGPAT5	AGPAT5	na	AGPAT5	na	na	na	na	na	na	na	na	AGPAT5	ANGPT2	na
rs2928576	TC	8	6600349	C	T	0.69599	0.0116	0.0013	18.3434	13.3152	0.8572	na	AGPAT5;ANGPT2	na	ANGPT2;AGPAT5	AGPAT5	na	AGPAT5	na	na	na	na	na	na	na	na	AGPAT5	ANGPT2	na
rs11783088	HDL	8	6620392	G	A	0.241572	-0.0109	0.0015	12.4336	9.30357	0.1592	na	AGPAT5;ANGPT2	na	ANGPT2;AGPAT5	AGPAT5	na	AGPAT5	na	na	na	na	na	na	na	na	AGPAT5	ANGPT2	na
rs2921064	logTG	8	8316637	C	T	0.490907	0.0144	0.0013	27.7895	23.3276	0.03664	na	AC022784.1;AC103957.2;AC021736.1;ALG1L13P	na	SGK223;CTA-398F10.2;CTD-3023L14.1;CTD-3023L14.2;CLDN23;RP11-211C9.1;MFHAS1	SGK223;CLDN23;MFHAS1	na	SGK223	PPP1R3B;MFHAS1;TNKS	na	na	na	MFHAS1	na	na	na	na	MFHAS1;SGK223	AC021736.1;AC022784.1;AC103957.2;ALG1L13P;CLDN23;CTA-398F10.2;CTD-3023L14.1;CTD-3023L14.2;PPP1R3B;RP11-211C9.1;TNKS
rs2001354	LDL	8	8569030	C	T	0.740458	-0.0108	0.0014	13.9148	12.0334	0.02828	na	na	na	CLDN23;MFHAS1;ERI1;PPP1R3B;RP11-10A14.5	CLDN23;ERI1	PPP1R3B	CLDN23	na	AC087269.1;CLDN23	na	PPP1R3B	na	na	na	na	CLDN23	PPP1R3B	AC087269.1;ERI1;MFHAS1;RP11-10A14.5
rs4841132	HDL	8	9183596	G	A	0.907112	0.0954	0.0021	449.894	389.691	0.01017	na	na	na	MFHAS1;ERI1;PPP1R3B;RP11-10A14.5;RP11-115J16.3;RP11-115J16.2;TNKS	ERI1;RP11-115J16.2;TNKS	TNKS	RP11-10A14.4	na	na	TNKS	TNKS	na	na	na	na	na	TNKS	ERI1;MFHAS1;PPP1R3B;RP11-10A14.4;RP11-10A14.5;RP11-115J16.2;RP11-115J16.3
rs4841132	LDL	8	9183596	G	A	0.907144	0.0601	0.0021	179.41	156.931	0.07656	na	AC021242.2	AC021242.2	MFHAS1;ERI1;PPP1R3B;RP11-10A14.5;RP11-115J16.3;RP11-115J16.2;TNKS	ERI1;RP11-115J16.2;TNKS	TNKS	RP11-10A14.4	na	na	TNKS	TNKS	na	na	na	na	na	TNKS	AC021242.2;ERI1;MFHAS1;PPP1R3B;RP11-10A14.4;RP11-10A14.5;RP11-115J16.2;RP11-115J16.3
rs4841132	TC	8	9183596	G	A	0.907409	0.0779	0.0021	300.475	276.024	0.3112	na	AC021242.2	AC021242.2	MFHAS1;RP11-115J16.2;TNKS	RP11-115J16.2;TNKS	TNKS	RP11-10A14.4	na	na	TNKS	TNKS	na	na	na	na	na	TNKS	AC021242.2;MFHAS1;RP11-10A14.4;RP11-115J16.2
rs4841133	nonHDL	8	9183664	G	A	0.910413	0.0539	0.0026	94.7379	87.5137	0.3849	na	na	na	RP11-115J16.2;TNKS	RP11-115J16.2;TNKS	TNKS	RP11-10A14.4	na	na	TNKS	TNKS	na	na	na	na	na	TNKS	RP11-10A14.4;RP11-115J16.2
rs17149279	logTG	8	9195638	C	T	0.776276	0.0176	0.0015	31.0655	25.5746	0.06344	na	TNKS	TNKS	MFHAS1;ERI1;PPP1R3B;RP11-10A14.5;RP11-10A14.9;RP11-115J16.3;RP11-115J16.2;TNKS	MFHAS1;ERI1;PPP1R3B;TNKS	TNKS	RP11-10A14.4	PPP1R3B;MFHAS1;TNKS	na	TNKS	TNKS	PPP1R3B;MFHAS1;TNKS	na	na	TNKS	na	MFHAS1;PPP1R3B	ERI1;RP11-10A14.4;RP11-10A14.5;RP11-10A14.9;RP11-115J16.2;RP11-115J16.3
rs4645567	LDL	8	9723964	T	A	0.240279	0.0111	0.0015	12.8659	12.4394	0.001297	na	na	na	RP11-10A14.5;RP11-115J16.2;TNKS	RP11-115J16.2;TNKS	TNKS	TNKS	na	na	TNKS	TNKS	na	na	na	na	TNKS	na	RP11-10A14.5;RP11-115J16.2
rs4645567	TC	8	9723964	T	A	0.241371	0.0109	0.0014	14.1591	13.3689	0.001629	na	na	na	RP11-115J16.2;TNKS	RP11-115J16.2;TNKS	TNKS	TNKS	na	na	TNKS	TNKS	na	na	na	na	TNKS	na	RP11-115J16.2
rs614197	HDL	8	9788582	G	A	0.249318	0.0134	0.0015	18.3837	14.7721	0.4393	na	na	na	RP11-115J16.2;TNKS	RP11-115J16.2;TNKS	MSRA	MSRA	na	na	TNKS	MSRA	na	na	na	na	na	MSRA	RP11-115J16.2;TNKS
rs9657541	HDL	8	10643164	C	T	0.811956	0.0181	0.0016	28.9439	23.0982	0.5864	na	na	na	RP1L1;C8orf74;SOX7;PINX1;XKR6;AF131215.8	SOX7;AF131215.8	MSRA	SOX7	SOX7	na	na	na	SOX7	na	na	na	SOX7	na	AF131215.8;C8orf74;MSRA;PINX1;RP1L1;XKR6
rs9657541	logTG	8	10643164	C	T	0.812097	-0.0275	0.0016	65.4822	59.4839	0.07475	na	na	na	MSRA;LINCR-0001;RP11-981G7.3;PRSS51;RP11-981G7.6;RP1L1;C8orf74;SOX7;PINX1;XKR6;AF131215.8;MTMR9	LINCR-0001;RP11-981G7.6;RP1L1;SOX7;AF131215.8;MTMR9	MSRA	SOX7	SOX7	PRSS55	na	MSRA	SOX7	na	na	na	SOX7	MSRA	AF131215.8;C8orf74;LINCR-0001;MTMR9;PINX1;PRSS51;PRSS55;RP11-981G7.3;RP11-981G7.6;RP1L1;XKR6
rs2409663	LDL	8	10643233	G	T	0.421991	0.0097	0.0013	13.0679	10.0205	0.1072	na	NEIL2;AC105001.1	AC105001.1	RP1L1;C8orf74;SOX7;PINX1;XKR6;AF131215.8	SOX7;AF131215.8	na	SOX7	GATA4;FDFT1;CTSB;BLK	CTD-2135J3.3;SOX7	na	na	na	na	na	na	SOX7	na	AC105001.1;AF131215.8;BLK;C8orf74;CTD-2135J3.3;CTSB;FDFT1;GATA4;NEIL2;PINX1;RP1L1;XKR6
rs4320509	logTG	8	11528339	G	C	0.870086	-0.0295	0.002	48.5119	44.313	0.01576	na	na	na	XKR6;AF131215.8;MTMR9;SLC35G5;FAM167A;BLK;RP11-148O21.6;LINC00208;GATA4;C8orf49;NEIL2;FDFT1;RP11-297N6.4;CTSB;DEFB134;USP17L2	AF131215.8;MTMR9;SLC35G5;FAM167A;BLK;NEIL2;FDFT1;RP11-297N6.4;CTSB	GATA4	GATA4	GATA4	na	na	GATA4	GATA4	na	na	GATA4	na	na	AF131215.8;BLK;C8orf49;CTSB;DEFB134;FAM167A;FDFT1;LINC00208;MTMR9;NEIL2;RP11-148O21.6;RP11-297N6.4;SLC35G5;USP17L2;XKR6
rs709821	TC	8	11702594	G	C	0.766629	-0.0124	0.0015	15.8609	12.3314	0.519	na	CTSB	CTSB	FDFT1;CTSB	CTSB	CTSB	CTSB	CTSB;FDFT1	DEFB135	na	CTSB	CTSB;FDFT1	na	CTSB	na	na	FDFT1	DEFB135
rs7459547	HDL	8	11854888	G	T	0.515442	-0.0021	0.0013	0.973763	8.30341	1.16e-10	na	AC087203.1;TDH;FAM90A25P;DEFB131E;AF131215.6;SLC35G5;AC130352.1;AF131216.3;ENPP7P12;FAM66A;AC068587.4;DEFB134;AF131215.5	AF131215.6;SLC35G5;ENPP7P12	FDFT1;RP11-297N6.4;CTSB	RP11-297N6.4	GATA4	DEFB134	GATA4;CTSB;FDFT1	na	na	na	CTSB;FDFT1	na	na	na	na	CTSB;DEFB134;FDFT1;GATA4	AC068587.4;AC087203.1;AC130352.1;AF131215.5;AF131215.6;AF131216.3;DEFB131E;ENPP7P12;FAM66A;FAM90A25P;RP11-297N6.4;SLC35G5;TDH
rs12680202	HDL	8	12617942	T	A	0.693524	0.0102	0.0015	10.9804	8.15536	0.08624	na	LONRF1	LONRF1	na	na	DLC1	LONRF1	na	na	na	na	na	na	na	na	na	LONRF1	DLC1
rs9632849	logTG	8	13506575	G	A	0.618523	-0.0095	0.0013	12.5658	8.63868	0.7378	na	na	na	na	na	DLC1	C8orf48	na	na	na	na	na	na	na	na	na	na	C8orf48;DLC1
rs1968041	logTG	8	17616562	C	T	0.623254	0.0089	0.0013	11.12	8.49356	0.2285	na	PCM1;ASAH1	na	MTUS1;FGL1;PCM1	MTUS1	SLC7A2	MTUS1	MTUS1	na	ASAH1;FGL1	na	MTUS1	na	na	na	MTUS1	PCM1	ASAH1;FGL1;SLC7A2
rs208771	HDL	8	17800472	C	T	0.442124	0.0102	0.0013	14.3676	11.0815	0.3796	na	PCM1	na	NAT2	NAT2	PCM1	PCM1	FGL1;PCM1	na	ASAH1;FGL1	PCM1	PCM1	na	na	PCM1	na	na	FGL1;NAT2
rs35246381	logTG	8	18272535	C	T	0.254158	0.0335	0.0014	125.811	108.575	0.04439	na	na	na	PCM1;NAT2	NAT2	PCM1	NAT2	NAT2	na	ASAH1	PCM1	NAT2	na	na	na	NAT2	PCM1	na
rs35570672	TC	8	18272635	C	T	0.73149	-0.0297	0.0014	99.1519	93.8892	0.002177	na	na	na	NAT2	NAT2	na	NAT2	NAT2	na	ASAH1	na	NAT2	na	na	na	NAT2	na	na
rs1495741	nonHDL	8	18272881	G	A	0.250139	0.0305	0.0017	71.2499	63.6407	0.0009488	na	na	na	NAT2	NAT2	na	NAT2	NAT2	na	ASAH1	na	NAT2	na	na	na	NAT2	na	na
rs1495743	LDL	8	18273300	G	C	0.253625	0.0185	0.0015	34.2225	36.1297	6.56e-05	na	na	na	NAT2	NAT2	na	NAT2	NAT2	na	ASAH1	na	NAT2	na	na	na	NAT2	na	na
rs2958557	HDL	8	19251679	C	T	0.992664	0.0779	0.0084	19.7457	16.4918	0.1037	na	LPL	LPL	na	na	na	SH2D4A	na	na	na	na	na	na	na	na	na	na	LPL;SH2D4A
rs2958557	logTG	8	19251679	C	T	0.992627	-0.0784	0.0083	20.4525	17.0073	0.04199	na	LPL	LPL	CSGALNACT1;RP11-1105O14.1;INTS10	CSGALNACT1;INTS10	na	SH2D4A	na	na	na	na	na	na	na	na	na	na	CSGALNACT1;INTS10;LPL;RP11-1105O14.1;SH2D4A
rs117199990	logTG	8	19820916	C	T	0.902857	0.1782	0.0021	1565.65	1503.41	1.07e-06	LPL	na	na	CSGALNACT1;RP11-1105O14.1;INTS10;LPL;SLC18A1;ATP6V1B2	CSGALNACT1;INTS10;LPL;SLC18A1;ATP6V1B2	LPL	LPL	LPL	LPL	LPL	LPL	LPL	na	LPL	na	na	na	ATP6V1B2;CSGALNACT1;INTS10;RP11-1105O14.1;SLC18A1
rs3208305	HDL	8	19823648	T	A	0.294412	0.1053	0.0014	1230.42	1197.18	1.28e-08	LPL	na	na	na	na	LPL	LPL	LPL	LPL	LPL	LPL	LPL	na	na	LPL	na	na	na
rs10096633	nonHDL	8	19830921	C	T	0.872882	0.0542	0.0022	133.288	120.157	0.0006062	LPL	na	na	CSGALNACT1;LPL	LPL	LPL	LPL	LPL	LPL	LPL	LPL	LPL	na	LPL	na	na	na	CSGALNACT1
rs147158682	HDL	8	20485546	G	A	0.99712	0.0878	0.0191	5.36764	9.02574	1.61e-06	na	na	na	na	na	ATP6V1B2	LZTS1	na	na	na	na	na	na	na	na	na	na	ATP6V1B2;LZTS1
rs2616213	logTG	8	20610866	C	T	0.521498	-0.0093	0.0013	12.0738	10.7642	0.01218	na	na	na	na	na	na	LZTS1	na	na	na	na	na	na	na	na	na	na	LZTS1
rs900776	LDL	8	21918089	C	A	0.190786	-0.0198	0.0017	30.6243	26.4205	0.3915	na	NPM2;DMTN;FGF17;FAM160B2	NPM2;FGF17;FAM160B2;DMTN	NPM2;FGF17;DMTN;FAM160B2	NPM2;FGF17;FAM160B2	BMP1	DMTN	na	na	LGI3	na	na	na	na	na	DMTN	FAM160B2;FGF17;NPM2	BMP1
rs900776	nonHDL	8	21918089	C	A	0.172346	-0.0218	0.002	26.9383	22.0159	0.1587	na	FGF17;DMTN;FAM160B2;NPM2	FGF17;DMTN;FAM160B2;NPM2	NPM2;DMTN;FAM160B2	NPM2;FAM160B2	BMP1	DMTN	na	XPO7	LGI3	na	na	na	na	na	DMTN	FAM160B2;NPM2	BMP1;FGF17;XPO7
rs900776	TC	8	21918089	C	A	0.184999	-0.0184	0.0016	29.8797	24.1094	0.2797	na	FGF17;DMTN;FAM160B2;NPM2	FGF17;FAM160B2;DMTN;NPM2	NPM2;FGF17;DMTN;FAM160B2	NPM2;FGF17;FAM160B2	SLC39A14	DMTN	na	na	LGI3	na	na	na	na	na	DMTN	FAM160B2;FGF17;NPM2	SLC39A14
rs397950126	LDL	8	23358480	TG	T	0.545996	-0.0074	0.0013	7.90193	8.59561	0.2704	na	ADAMDEC1	na	SLC25A37	na	SLC25A37	SLC25A37	na	na	CHMP7	SLC25A37	na	na	na	na	SLC25A37	na	ADAMDEC1
rs397950126	TC	8	23358480	TG	T	0.54901	-0.0067	0.0013	6.59312	9.45637	0.3613	na	ADAMDEC1	na	CTC-756D1.2;SLC25A37	CTC-756D1.2	SLC25A37	SLC25A37	na	na	CHMP7	SLC25A37	na	na	na	na	SLC25A37	na	ADAMDEC1;CTC-756D1.2
rs56193509	logTG	8	23525075	T	A	0.74709	-0.0091	0.0014	10.0952	7.78185	0.04546	na	NKX3-1;AC107959.1	NKX3-1	NKX3-1;NKX2-6	NKX3-1	na	NKX3-1	na	na	CHMP7	na	na	na	na	na	NKX3-1	na	AC107959.1;NKX2-6
rs73221948	HDL	8	25464670	G	T	0.728167	0.013	0.0017	13.6869	11.2321	0.07781	na	na	na	na	na	EBF2	CDCA2	na	DOCK5	na	na	na	na	na	na	na	na	CDCA2;DOCK5;EBF2
rs11992444	logTG	8	25464690	G	T	0.490853	0.0111	0.0015	12.8659	10.2719	0.5592	na	na	na	EBF2	na	CDCA2	CDCA2	na	na	na	CDCA2	na	na	na	na	na	CDCA2	EBF2
rs7007256	logTG	8	26203081	G	A	0.271808	-0.0095	0.0014	10.9374	8.23164	0.5482	na	na	na	EBF2;BNIP3L	na	DPYSL2	PPP2R2A	BNIP3L;PPP2R2A	na	na	na	BNIP3L;PPP2R2A	na	na	na	na	BNIP3L;PPP2R2A	DPYSL2;EBF2
rs117139027	LDL	8	29024943	G	A	0.985726	0.0803	0.0062	37.6381	32.2179	0.1364	na	na	na	na	na	HMBOX1	KIF13B	na	KIF13B	INTS9;KIF13B	na	na	na	na	na	na	KIF13B	HMBOX1
rs117139027	nonHDL	8	29024943	G	A	0.985675	0.0765	0.0081	20.447	17.1888	0.1067	na	na	na	na	na	EXTL3	KIF13B	na	KIF13B	INTS9;KIF13B	na	na	na	na	na	na	KIF13B	EXTL3
rs117139027	TC	8	29024943	G	A	0.985711	0.0692	0.0061	29.1013	24.3551	0.0557	na	na	na	na	na	HMBOX1	KIF13B	na	KIF13B	INTS9;KIF13B	na	na	na	na	na	na	KIF13B	HMBOX1
rs4609187	HDL	8	34519519	G	A	0.683955	-0.0093	0.0014	10.5119	8.45663	0.1256	na	na	na	na	na	na	na	na	na	na	na	na	na	na	na	na	na	na
rs16885613	HDL	8	36848357	C	T	0.198426	-0.011	0.0015	12.6488	8.84128	0.1403	na	AC138356.1;AC092818.1;ZNF703	AC138356.1;AC092818.1;ZNF703	na	na	na	KCNU1	na	na	na	na	na	na	na	na	na	na	AC092818.1;AC138356.1;KCNU1;ZNF703
rs10096213	logTG	8	36853213	C	T	0.802788	-0.0139	0.0016	17.4312	13.5002	0.4966	na	ZNF703;AC092818.1;AC138356.1	ZNF703;AC092818.1;AC138356.1	RP11-419C23.1	RP11-419C23.1	na	KCNU1	na	na	na	na	na	na	na	na	na	na	AC092818.1;AC138356.1;KCNU1;RP11-419C23.1;ZNF703
rs4739514	logTG	8	37385495	C	A	0.0949324	-0.017	0.0024	11.8516	7.62969	0.4852	na	AC124067.2	na	RP11-419C23.1;ZNF703	RP11-419C23.1;ZNF703	ZNF703	ZNF703	na	na	na	ZNF703	na	na	na	na	ZNF703	na	AC124067.2;RP11-419C23.1
rs10958704	logTG	8	38328302	G	A	0.389946	0.0118	0.0013	18.952	15.092	0.572	na	FGFR1;AC087623.1	FGFR1;AC087623.1	FGFR1	FGFR1	FGFR1	FGFR1	na	na	DDHD2	FGFR1	na	na	na	FGFR1	na	na	AC087623.1
rs4082204	HDL	8	38328902	G	A	0.616601	0.0097	0.0013	13.0679	9.59213	0.4368	na	AC087623.1;FGFR1	AC087623.1;FGFR1	na	na	FGFR1	FGFR1	na	na	DDHD2	FGFR1	na	na	na	na	FGFR1	na	AC087623.1
rs34265667	TC	8	41542093	G	A	0.970866	0.0254	0.0037	11.1768	8.84394	0.209	na	na	na	na	na	ANK1	ANK1	na	ANK1	GOLGA7	ANK1	na	na	na	na	ANK1	na	na
rs10104003	TC	8	55422440	C	T	0.794915	-0.0231	0.0015	52.786	47.287	0.06393	na	na	na	RP1	na	na	SOX17	na	na	SOX17	na	na	na	na	na	na	na	RP1;SOX17
rs9298506	LDL	8	55437524	G	A	0.20455	0.0234	0.0015	54.1379	44.6219	0.4682	na	na	na	na	na	na	SOX17	na	na	SOX17	na	na	na	na	na	na	na	SOX17
rs28503706	nonHDL	8	55441799	G	A	0.211609	0.027	0.0018	50.1342	44.5563	0.07048	na	na	na	RP1	na	SOX17	SOX17	na	na	SOX17	SOX17	na	na	na	na	na	SOX17	RP1
rs2081687	logTG	8	59388565	C	T	0.676735	-0.022	0.0013	63.517	55.129	0.09558	na	CYP7A1	na	UBXN2B;CYP7A1;SDCBP;NSMAF	UBXN2B;CYP7A1;SDCBP;NSMAF	na	CYP7A1	CYP7A1	na	CYP7A1;FAM110B	na	CYP7A1	na	na	CYP7A1	na	na	NSMAF;SDCBP;UBXN2B
rs9297994	LDL	8	59392324	G	A	0.311797	0.0349	0.0014	136.438	131.189	0.7753	na	SDCBP;CYP7A1	SDCBP	UBXN2B;CYP7A1;SDCBP;NSMAF	UBXN2B;CYP7A1;SDCBP;NSMAF	CYP7A1	CYP7A1	CYP7A1;SDCBP	na	CYP7A1;FAM110B	CYP7A1	CYP7A1;SDCBP	na	CYP7A1	na	SDCBP	na	NSMAF;UBXN2B
rs9297994	nonHDL	8	59392324	G	A	0.315355	0.0393	0.0016	132.498	124.039	0.176	na	CYP7A1;SDCBP	SDCBP	UBXN2B;CYP7A1;SDCBP;NSMAF	UBXN2B;CYP7A1;SDCBP;NSMAF	CYP7A1	CYP7A1	CYP7A1;SDCBP	na	CYP7A1;FAM110B	CYP7A1	CYP7A1;SDCBP	na	CYP7A1	na	SDCBP	na	NSMAF;UBXN2B
rs9297994	TC	8	59392324	G	A	0.306554	0.0386	0.0013	193.015	172.205	0.8737	na	SDCBP;CYP7A1	SDCBP	UBXN2B;CYP7A1;SDCBP;NSMAF	UBXN2B;CYP7A1;SDCBP;NSMAF	CYP7A1	CYP7A1	CYP7A1;SDCBP;NSMAF	CYP7A1	CYP7A1;FAM110B	CYP7A1	CYP7A1;SDCBP;NSMAF	CYP7A1	na	na	SDCBP	NSMAF	UBXN2B
rs1949102	HDL	8	60654261	G	A	0.231537	0.0106	0.0015	11.7994	9.4423	0.02188	na	na	na	na	na	na	CA8	na	na	na	na	na	na	na	na	na	na	CA8
rs6471886	LDL	8	61409871	G	T	0.616742	-0.0109	0.0013	16.2934	12.0283	0.6656	na	na	na	LINC01301;RAB2A	LINC01301;RAB2A	na	RAB2A	na	na	na	na	na	na	na	na	na	RAB2A	LINC01301
rs660865	logTG	8	61531713	T	A	0.407422	0.0094	0.0013	12.3185	8.89013	0.1871	na	na	na	LINC01301;RAB2A;RP11-91I20.3	LINC01301;RAB2A	CHD7	RAB2A	na	RAB2A	na	na	na	na	na	na	RAB2A	na	CHD7;LINC01301;RP11-91I20.3
rs615031	nonHDL	8	61539278	T	A	0.400423	0.0137	0.0015	19.1777	14.4827	0.4644	na	na	na	LINC01301;RAB2A;RP11-91I20.3	LINC01301;RAB2A	na	RAB2A	na	na	na	na	na	na	na	na	na	RAB2A	LINC01301;RP11-91I20.3
rs615031	TC	8	61539278	T	A	0.408261	0.0141	0.0012	31.1511	23.7545	0.7724	na	na	na	LINC01301;RAB2A;RP11-91I20.3	LINC01301;RAB2A	na	RAB2A	na	na	na	na	na	na	na	na	na	RAB2A	LINC01301;RP11-91I20.3
rs112067118	logTG	8	64622944	AT	A	0.839248	-0.009	0.0018	6.24162	7.63032	4.92e-05	na	na	na	RP11-579E24.2	na	na	YTHDF3	na	na	na	na	na	na	na	na	na	na	RP11-579E24.2;YTHDF3
rs6994609	HDL	8	64799004	G	T	0.526711	0.0103	0.0013	14.6351	11.532	0.5105	na	na	na	na	na	na	na	na	na	na	na	na	na	na	na	na	na	na
rs35395175	HDL	8	71196058	C	A	0.871355	0.0248	0.0019	38.2119	30.0533	0.6418	na	na	na	na	na	NCOA2	NCOA2	NCOA2	na	na	NCOA2	NCOA2	na	na	na	NCOA2	na	na
rs28471687	HDL	8	72459582	G	A	0.0755233	-0.0209	0.0023	18.992	14.3554	0.1584	na	EYA1	na	na	na	na	RP11-1102P16.1	na	na	na	na	na	na	na	na	na	na	EYA1;RP11-1102P16.1
rs745578	logTG	8	72466324	G	A	0.692131	-0.0155	0.0014	27.7629	23.1998	0.07019	na	na	na	EYA1	EYA1	na	RP11-1102P16.1	na	RP11-1102P16.1	na	na	na	na	na	na	na	RP11-1102P16.1	EYA1
rs745578	nonHDL	8	72466324	G	A	0.68796	-0.0112	0.0017	10.3516	9.35839	0.0112	na	EYA1	na	EYA1	EYA1	na	RP11-1102P16.1	na	RP11-1102P16.1	na	na	na	na	na	na	na	EYA1;RP11-1102P16.1	na
rs2306486	LDL	8	74888494	C	T	0.701097	0.0145	0.0014	24.4107	20.939	0.1458	na	TMEM70	na	UBE2W;TCEB1;TMEM70;LY96;RP11-6I2.3	TCEB1;TMEM70	na	TMEM70	na	na	na	na	na	na	na	na	TMEM70	na	LY96;RP11-6I2.3;TCEB1;UBE2W
rs4385461	nonHDL	8	74899700	G	T	0.696478	0.0157	0.0016	22.0023	17.4367	0.4078	na	TMEM70	na	UBE2W;TCEB1;TMEM70;LY96;RP11-6I2.3	TCEB1;TMEM70	na	LY96	na	na	na	na	na	na	na	na	na	LY96;TMEM70	RP11-6I2.3;TCEB1;UBE2W
rs4385461	TC	8	74899700	G	T	0.705785	0.0132	0.0013	23.4968	18.4304	0.1646	na	TMEM70	na	TCEB1;TMEM70;LY96;RP11-6I2.3	TCEB1;TMEM70	na	LY96	LY96	na	na	na	LY96	na	na	na	LY96	TMEM70	RP11-6I2.3;TCEB1
rs400824	LDL	8	81357702	C	T	0.68287	-0.0096	0.0014	11.1533	7.40517	0.5422	na	AC009812.4;ZBTB10	na	ZBTB10;RP11-48B3.4	ZBTB10	na	ZBTB10	na	na	na	na	na	na	na	na	ZBTB10	na	AC009812.4;RP11-48B3.4
rs400824	TC	8	81357702	C	T	0.6891	-0.0095	0.0014	10.9374	7.63872	0.8952	na	ZBTB10;AC009812.4	na	ZBTB10;RP11-48B3.4	ZBTB10	na	ZBTB10	ZBTB10	na	na	na	ZBTB10	na	na	ZBTB10	na	na	AC009812.4;RP11-48B3.4
rs6473280	logTG	8	82404216	C	T	0.331151	-0.0101	0.0014	12.2659	9.41561	0.04134	na	na	na	PMP2;FABP4	PMP2;FABP4	FABP4	FABP4	FABP4	na	FABP4;PMP2	FABP4	FABP4	na	na	FABP4	na	na	PMP2
rs1802539	HDL	8	103876183	G	A	0.817836	-0.0128	0.0016	14.9051	11.8871	0.1079	na	AZIN1-AS1	AZIN1-AS1	na	na	UBR5	AZIN1	AZIN1	AZIN1;KB-1507C5.2	na	na	AZIN1	na	na	na	AZIN1	na	AZIN1-AS1;KB-1507C5.2;UBR5
rs979646	HDL	8	106385695	C	A	0.477133	0.0097	0.0012	15.2005	10.9111	0.1623	na	na	na	na	na	ZFPM2	RP11-127H5.1	na	na	na	na	na	na	na	na	na	na	RP11-127H5.1;ZFPM2
rs67057051	logTG	8	106433378	C	T	0.243563	0.0109	0.0015	12.4336	9.42057	0.2593	na	na	na	na	na	ZFPM2	ZFPM2	ZFPM2	na	na	ZFPM2	ZFPM2	na	na	na	ZFPM2	na	na
rs3808460	HDL	8	116597635	C	T	0.61676	0.0325	0.0013	137.214	123.986	0.01192	na	na	na	TRPS1	TRPS1	na	TRPS1	na	na	na	na	na	na	na	na	na	TRPS1	na
rs13265978	logTG	8	116638975	C	T	0.0703108	0.0204	0.0026	14.3676	12.1907	0.05268	na	na	na	TRPS1	na	TRPS1	TRPS1	TRPS1	na	na	TRPS1	TRPS1	na	na	TRPS1	na	na	na
rs2721961	LDL	8	116657911	G	T	0.299623	-0.0232	0.0014	60.9503	59.414	0.000132	na	TRPS1	na	TRPS1	TRPS1	na	TRPS1	na	na	na	na	na	na	na	na	TRPS1	na	na
rs2737245	TC	8	116658583	G	T	0.731911	0.0276	0.0013	99.3041	83.9947	0.004882	na	TRPS1	na	TRPS1	na	na	TRPS1	na	na	na	na	na	na	na	na	TRPS1	na	na
rs2737246	nonHDL	8	116659578	G	C	0.724213	0.0286	0.0016	70.7336	62.7302	0.002761	na	TRPS1	na	TRPS1	TRPS1	na	TRPS1	na	na	na	na	na	na	na	na	TRPS1	na	na
rs10955992	HDL	8	121872464	C	A	0.655507	-0.0195	0.0013	50.1342	40.4916	0.07095	na	na	na	na	na	na	SNTB1	SNTB1	na	na	na	SNTB1	na	na	na	na	SNTB1	na
rs10955992	TC	8	121872464	C	A	0.655515	-0.0101	0.0013	14.1026	10.9129	0.1433	na	na	na	SNTB1	SNTB1	na	SNTB1	SNTB1	na	na	na	SNTB1	na	na	na	SNTB1	na	na
rs35360670	logTG	8	125756010	C	A	0.954919	-0.0213	0.0032	10.5514	7.36094	0.4922	na	na	na	ZNF572	na	MTSS1	MTSS1	MTSS1	na	na	MTSS1	MTSS1	na	na	na	MTSS1	na	ZNF572
rs28601761	LDL	8	126500031	G	C	0.394671	-0.0584	0.0013	439.972	449.799	6.44e-34	na	AC100858.3	na	TRIB1;RP11-136O12.2	RP11-136O12.2	SQLE	TRIB1	TRIB1	na	na	na	TRIB1	na	na	na	TRIB1	na	AC100858.3;RP11-136O12.2;SQLE
rs28601761	logTG	8	126500031	G	C	0.394238	-0.0834	0.0013	895.622	893.697	1.7e-34	na	na	na	TRIB1;RP11-136O12.2	RP11-136O12.2	TRIB1	TRIB1	TRIB1	na	na	TRIB1	TRIB1	na	na	TRIB1	na	na	RP11-136O12.2
rs28601761	nonHDL	8	126500031	G	C	0.389532	-0.081	0.0015	635.032	598.247	3.34e-28	na	na	na	TRIB1;RP11-136O12.2	RP11-136O12.2	TRIB1	TRIB1	TRIB1	na	na	TRIB1	TRIB1	na	na	TRIB1	na	na	RP11-136O12.2
rs28601761	TC	8	126500031	G	C	0.387159	-0.0668	0.0012	674.735	626.171	1.18e-44	na	na	na	TRIB1;RP11-136O12.2	RP11-136O12.2	SQLE	TRIB1	TRIB1	na	na	na	TRIB1	na	na	na	TRIB1	na	RP11-136O12.2;SQLE
rs2980888	HDL	8	126507308	C	T	0.715156	0.04	0.0014	178.818	169.254	6.24e-05	na	AC091114.1;WASHC5	AC091114.1	TRIB1;RP11-136O12.2	RP11-136O12.2	TRIB1	TRIB1	TRIB1	na	na	TRIB1	TRIB1	na	na	TRIB1	na	na	AC091114.1;RP11-136O12.2;WASHC5
rs1561929	logTG	8	129567373	C	T	0.115357	-0.0143	0.002	12.0616	9.32379	0.2091	na	na	na	na	na	na	na	na	na	na	na	na	na	na	na	na	na	na
rs58301047	HDL	8	144296480	G	C	0.793583	-0.0256	0.0016	56.8936	51.7755	0.02682	GPIHBP1	GPIHBP1;LY6H	na	na	na	EEF1D	GPIHBP1	GPIHBP1	CCDC166	GPIHBP1;SLURP1	na	GPIHBP1	na	na	na	GPIHBP1	na	CCDC166;EEF1D;LY6H
rs72691637	logTG	8	144306970	G	A	0.788105	0.0134	0.0016	16.2579	11.6958	0.3914	GPIHBP1	na	na	GPIHBP1;ZFP41;GLI4;ZNF696;TOP1MT	GPIHBP1;ZFP41;GLI4;ZNF696;TOP1MT	ZC3H3	GPIHBP1	GPIHBP1	na	GPIHBP1;SLURP1	na	GPIHBP1	na	na	na	GPIHBP1	na	GLI4;TOP1MT;ZC3H3;ZFP41;ZNF696
rs11781667	TC	8	145040856	G	T	0.676175	-0.0197	0.0013	51.1459	44.1211	0.2556	na	PLEC;SPATC1;PARP10;AF186192.1;NRBP2	PARP10;NRBP2	EPPK1;PLEC;PARP10;GRINA;SPATC1;MAF1;WDR97	EPPK1;PLEC;PARP10;GRINA;SPATC1	DGAT1	PLEC	GRINA;PARP10;PLEC	PARP10	DGAT1	na	GRINA;PARP10;PLEC	na	na	PARP10;PLEC	na	GRINA;SPATC1	AF186192.1;DGAT1;EPPK1;MAF1;NRBP2;WDR97
rs1134030	LDL	8	145051484	C	T	0.660781	-0.0228	0.0014	58.9043	55.2425	0.379	na	NRBP2;PARP10;OPLAH;AF186192.1;ZNF16	NRBP2	EPPK1;PLEC;PARP10;GRINA;SPATC1	EPPK1;PLEC;PARP10;GRINA;SPATC1	DGAT1	PARP10	GRINA;PARP10;PLEC	PARP10	DGAT1	na	GRINA;PARP10;PLEC	na	PARP10	na	na	GRINA;PLEC	AF186192.1;DGAT1;EPPK1;NRBP2;OPLAH;SPATC1;ZNF16
rs1134030	nonHDL	8	145051484	C	T	0.666474	-0.0228	0.0016	45.3484	39.1829	0.1101	na	PARP10;ZNF16;OPLAH;SMPD5;AF186192.1	SMPD5	EPPK1;PLEC;PARP10;GRINA;SPATC1	EPPK1;PLEC;PARP10;GRINA;SPATC1	DGAT1	PARP10	GRINA;PLEC;PARP10	PARP10	DGAT1	na	GRINA;PLEC;PARP10	na	PARP10	na	na	GRINA;PLEC	AF186192.1;DGAT1;EPPK1;OPLAH;SMPD5;SPATC1;ZNF16
rs1567353	logTG	9	1033773	G	C	0.356975	0.0113	0.0013	17.4496	12.5593	0.6092	na	DMRT2	na	LINC01230;DMRT2	LINC01230	KANK1	DMRT2	na	DMRT1	na	na	na	na	na	na	DMRT2	na	DMRT1;KANK1;LINC01230
rs10959032	HDL	9	1038666	C	T	0.732068	0.0119	0.0014	16.7222	14.4773	0.0009641	na	na	na	na	na	KANK1	DMRT2	na	na	na	na	na	na	na	na	na	na	DMRT2;KANK1
rs2219143	logTG	9	2622278	G	A	0.619537	0.008	0.0014	7.95795	8.1368	0.001614	na	VLDLR	VLDLR	VLDLR	VLDLR	SMARCA2	VLDLR	VLDLR	RP11-125B21.2;VLDLR	VLDLR	na	VLDLR	na	VLDLR	na	na	na	RP11-125B21.2;SMARCA2
rs3780181	LDL	9	2640759	G	A	0.0805613	-0.0354	0.0023	52.7276	43.7413	0.3421	na	na	na	na	na	VLDLR	VLDLR	na	na	VLDLR	VLDLR	na	na	na	na	na	VLDLR	na
rs3780181	nonHDL	9	2640759	G	A	0.0762353	-0.0311	0.0028	27.9363	22.478	0.23	na	na	na	na	na	VLDLR	VLDLR	VLDLR	na	VLDLR	VLDLR	VLDLR	na	na	na	VLDLR	na	na
rs3780181	TC	9	2640759	G	A	0.0807692	-0.0325	0.0023	44.608	38.5108	0.4311	na	na	na	PUM3	na	SMARCA2	VLDLR	na	na	VLDLR	na	na	na	na	na	na	na	PUM3;SMARCA2;VLDLR
rs77375493	HDL	9	5073770	G	T	0.999629	0.3579	0.0457	14.3169	21.8239	0.5863	na	na	na	na	na	JAK2	JAK2	na	AL161450.1;JAK2	na	JAK2	na	na	na	na	JAK2	na	AL161450.1
rs77375493	TC	9	5073770	G	T	0.999631	0.3096	0.0451	11.1765	12.2206	0.9284	na	na	na	na	na	JAK2	JAK2	na	AL161450.1;JAK2	na	JAK2	na	na	na	na	JAK2	na	AL161450.1
rs2773513	logTG	9	6666512	T	A	0.150308	0.0135	0.0017	14.6984	10.1685	0.6636	na	GLDC	GLDC	GLDC;RP11-390F4.6	RP11-390F4.6	KDM4C	GLDC	na	na	na	na	na	na	na	na	GLDC	na	KDM4C;RP11-390F4.6
rs820503	TC	9	6667928	C	A	0.860585	-0.0124	0.0017	12.522	9.29801	0.137	na	na	na	na	na	KDM4C	GLDC	na	na	na	na	na	na	na	na	na	na	GLDC;KDM4C
rs10961056	HDL	9	13452771	G	A	0.600007	0.0085	0.0013	10.2065	7.32873	0.1466	na	na	na	na	na	na	MPDZ	na	na	na	na	na	na	na	na	na	na	MPDZ
rs1590404	logTG	9	13697152	C	A	0.536185	-0.0105	0.0013	15.1777	10.9823	0.3741	na	na	na	RP11-536O18.1;LINC01235	RP11-536O18.1	NFIB	NFIB	MPDZ	na	na	NFIB	na	na	na	na	na	NFIB	LINC01235;MPDZ;RP11-536O18.1
rs543458	HDL	9	14068327	C	A	0.167857	0.0125	0.0017	12.7124	9.10373	0.4805	na	na	na	na	na	NFIB	NFIB	NFIB	na	na	NFIB	NFIB	na	na	na	NFIB	na	na
rs686030	HDL	9	15304782	C	A	0.127951	-0.0485	0.0019	142.997	132.855	0.03549	na	TTC39B	TTC39B	na	na	na	TTC39B	TTC39B	na	na	na	TTC39B	na	na	na	TTC39B	na	na
rs686030	logTG	9	15304782	C	A	0.128213	-0.0159	0.0019	16.2336	12.9428	0.3155	na	TTC39B	TTC39B	TTC39B	TTC39B	PSIP1	TTC39B	TTC39B	na	na	na	TTC39B	na	na	TTC39B	na	na	PSIP1
rs686030	TC	9	15304782	C	A	0.128442	-0.025	0.0018	43.1309	35.9758	0.2154	na	TTC39B	TTC39B	TTC39B	TTC39B	na	TTC39B	TTC39B	na	na	na	TTC39B	na	na	TTC39B	na	na	na
rs10810657	nonHDL	9	16884586	T	A	0.455696	0.0166	0.0015	27.7398	21.7813	0.5274	na	na	na	BNC2	BNC2	na	BNC2	na	na	na	na	na	na	na	na	na	BNC2	na
rs28498684	LDL	9	16900695	G	A	0.534117	-0.0137	0.0013	25.2409	20.9343	0.2492	na	BNC2	BNC2	BNC2	BNC2	na	BNC2	na	na	na	na	na	na	na	na	BNC2	na	na
rs28498684	TC	9	16900695	G	A	0.525645	-0.013	0.0012	26.6211	20.7742	0.05321	na	BNC2	BNC2	BNC2	BNC2	na	BNC2	na	na	na	na	na	na	na	na	BNC2	na	na
rs62543565	HDL	9	16901067	C	A	0.408447	-0.0091	0.0013	11.5918	8.74949	0.1924	na	na	na	BNC2	BNC2	na	BNC2	na	BNC2	na	na	na	na	na	na	BNC2	na	na
rs62543565	logTG	9	16901067	C	A	0.404847	0.0144	0.0013	27.7895	23.7376	0.09166	na	na	na	BNC2	BNC2	na	BNC2	BNC2	na	na	na	BNC2	na	na	na	BNC2	na	na
rs34025997	HDL	9	19254604	G	A	0.924145	-0.0169	0.0024	11.7214	7.8197	0.7569	na	AL391834.2;RPS6	na	DENND4C;RPS6;ACER2	DENND4C;RPS6;ACER2	PLIN2	DENND4C	DENND4C	RP11-513M16.7;RPS6;DENND4C;RP11-513M16.8;NDUFA5P3	ACER2;PLIN2	na	DENND4C	na	na	DENND4C	RPS6	na	ACER2;AL391834.2;NDUFA5P3;PLIN2;RP11-513M16.7;RP11-513M16.8
rs34150222	nonHDL	9	19313913	G	A	0.076366	0.0303	0.0028	26.5646	22.8081	0.2337	na	na	na	DENND4C;RPS6;ACER2	DENND4C;RPS6;ACER2	DENND4C	DENND4C	DENND4C	NDUFA5P3;RPS6;RP11-513M16.8;RP11-513M16.7;DENND4C	ACER2;PLIN2	DENND4C	DENND4C	na	DENND4C	na	na	RPS6	ACER2;NDUFA5P3;RP11-513M16.7;RP11-513M16.8
rs72700413	LDL	9	19323815	G	A	0.922389	-0.0327	0.0024	41.5461	37.2283	0.72	na	AL391834.2;RPS6	na	DENND4C;RPS6;ACER2	DENND4C;RPS6;ACER2	DENND4C	DENND4C	DENND4C	RP11-513M16.7;RPS6;DENND4C;RP11-513M16.8	ACER2;PLIN2	DENND4C	DENND4C	na	DENND4C	na	RPS6	na	ACER2;AL391834.2;RP11-513M16.7;RP11-513M16.8
rs10114039	TC	9	19352260	T	A	0.102847	0.0296	0.002	48.8342	41.0723	0.0851	na	RPS6;AL391834.2;AL391834.1	RPS6;AL391834.2	RRAGA;DENND4C;RPS6;ACER2	DENND4C;RPS6;ACER2	PLIN2	DENND4C	DENND4C	RP11-513M16.7;RPS6;DENND4C;RP11-513M16.8	ACER2;PLIN2	na	DENND4C	na	na	DENND4C	RPS6	na	ACER2;AL391834.1;AL391834.2;PLIN2;RP11-513M16.7;RP11-513M16.8;RRAGA
rs10757273	TC	9	22090301	C	A	0.533431	0.0118	0.0013	18.952	16.0647	0.01139	na	na	na	CDKN2B	na	CDKN2A	RP11-145E5.5	na	na	na	na	na	na	na	na	na	na	CDKN2A;CDKN2B;RP11-145E5.5
rs1537373	LDL	9	22103341	G	T	0.531163	-0.0116	0.0013	18.3434	16.3077	0.01052	na	na	na	CDKN2B	CDKN2B	na	RP11-145E5.5	na	na	na	na	na	na	na	na	na	na	CDKN2B;RP11-145E5.5
rs1333047	nonHDL	9	22124504	T	A	0.512531	-0.0112	0.0015	13.0849	10.331	0.05825	na	na	na	CDKN2B	na	CDKN2A	RP11-145E5.5	na	na	na	na	na	na	na	na	na	na	CDKN2A;CDKN2B;RP11-145E5.5
rs1412234	HDL	9	28410683	C	T	0.296117	-0.0118	0.0014	16.456	13.5077	0.08507	na	na	na	na	na	na	LINGO2	na	na	na	na	na	na	na	na	na	na	LINGO2
rs17770336	logTG	9	28414625	C	T	0.703893	-0.0095	0.0014	10.9374	8.18847	0.3462	na	na	na	na	na	na	LINGO2	na	na	na	na	na	na	na	na	na	na	LINGO2
rs12985	logTG	9	32450187	C	T	0.384447	-0.0083	0.0013	9.7649	7.83582	0.08807	na	TOPORS;ACO1	na	DDX58;TOPORS;TOPORS-AS1;NDUFB6	NDUFB6	ACO1	ACO1	ACO1	DDX58	na	ACO1	ACO1	na	na	ACO1	na	DDX58;TOPORS	NDUFB6;TOPORS-AS1
rs11795343	HDL	9	32523737	C	T	0.393159	0.0099	0.0013	13.5802	9.27234	0.8851	na	DDX58	na	na	na	ACO1	DDX58	ACO1;DDX58	na	na	na	DDX58	na	na	na	DDX58	ACO1	na
rs10758191	HDL	9	33128429	G	A	0.495683	-0.0092	0.0012	13.7532	9.11695	0.2832	na	na	na	B4GALT1	na	B4GALT1	B4GALT1	B4GALT1	na	AQP3;AQP7	B4GALT1	B4GALT1	na	na	B4GALT1	na	na	na
rs10971957	logTG	9	34151463	C	T	0.425656	0.0102	0.0013	14.3676	13.7628	0.0006106	na	NUDT2;KIF24	NUDT2;KIF24	PRSS3;UBE2R2;UBAP2;UBAP1;KIF24;NUDT2;KIAA1161	UBE2R2;UBAP2;UBAP1;NUDT2;KIAA1161	UBE2R2	DCAF12	na	na	ENHO;PRSS3	UBE2R2	na	na	na	na	na	KIF24;NUDT2;UBE2R2	DCAF12;KIAA1161;PRSS3;UBAP1;UBAP2
rs10971974	HDL	9	34175780	C	T	0.609756	-0.0093	0.0013	12.0738	7.76335	0.9179	na	NUDT2	NUDT2	na	na	UBE2R2	UBAP1	UBAP1	UBAP2;RNU7-36P;NUDT2	ENHO;PRSS3	na	UBAP1	na	na	na	na	NUDT2;UBAP1	RNU7-36P;UBAP2;UBE2R2
rs7864568	LDL	9	78212428	G	A	0.672747	0.0149	0.0014	25.7252	20.4343	0.8367	na	AL353780.1	na	na	na	na	PCSK5	na	na	PCSK5	na	na	na	na	na	na	na	AL353780.1;PCSK5
rs7864568	TC	9	78212428	G	A	0.673403	0.0125	0.0013	21.1621	14.6514	0.5273	na	AL353780.1	na	na	na	na	PCSK5	na	na	PCSK5	na	na	na	na	na	na	na	AL353780.1;PCSK5
rs2209915	nonHDL	9	78214833	G	A	0.682391	0.0151	0.0017	18.184	14.9857	0.358	na	na	na	na	na	na	PCSK5	na	na	PCSK5	na	na	na	na	na	na	na	PCSK5
rs1571791	LDL	9	78729213	C	T	0.615488	-0.0119	0.0013	19.2601	17.1514	0.02675	na	na	na	na	na	na	PCSK5	na	na	PCSK5	na	na	na	na	na	na	na	PCSK5
rs1571791	nonHDL	9	78729213	C	T	0.617928	-0.0134	0.0015	18.3837	15.7576	0.01268	na	na	na	na	na	na	PCSK5	na	na	PCSK5	na	na	na	na	na	na	na	PCSK5
rs1571791	TC	9	78729213	C	T	0.616342	-0.0112	0.0012	19.9889	15.5199	0.02805	na	na	na	na	na	na	PCSK5	na	na	PCSK5	na	na	na	na	na	na	na	PCSK5
rs10868080	logTG	9	86626769	T	A	0.273672	-0.0104	0.0014	12.9595	10.0949	0.6416	na	RMI1	na	GKAP1;C9orf64;HNRNPK;RMI1	HNRNPK;RMI1	na	RMI1	HNRNPK;C9orf64	RMI1;KIF27	na	na	HNRNPK;C9orf64	na	na	RMI1	na	C9orf64;HNRNPK	GKAP1;KIF27
rs41310053	HDL	9	88940359	C	T	0.994463	-0.063	0.0091	11.3546	8.15173	0.2619	na	na	na	na	na	na	ZCCHC6	na	ZCCHC6	na	na	na	na	na	na	na	ZCCHC6	na
rs62551047	LDL	9	91434086	G	A	0.941446	0.0197	0.0028	11.7028	10.0438	0.564	na	C9orf47	na	C9orf47	na	na	C9orf47	na	na	na	na	na	na	na	na	C9orf47	na	na
rs9410381	TC	9	91454519	C	T	0.941402	0.0183	0.0027	10.9135	8.51418	0.9397	na	C9orf47	na	C9orf47	na	CKS2	C9orf47	na	na	na	na	na	na	na	na	C9orf47	na	CKS2
rs1571535	logTG	9	92215734	C	T	0.498743	0.0102	0.0012	16.7222	14.5964	0.0001369	na	GADD45G	na	SEMA4D;GADD45G;UNQ6494	SEMA4D;UNQ6494	SECISBP2	GADD45G	GADD45G	na	na	na	GADD45G	na	na	GADD45G	na	na	SECISBP2;SEMA4D;UNQ6494
rs773519	HDL	9	93944244	C	T	0.220301	-0.0076	0.0016	5.69161	8.84595	9.37e-07	na	na	na	na	na	NFIL3	AUH	na	na	NFIL3	na	na	na	na	na	na	na	AUH;NFIL3
rs10992409	logTG	9	95445032	G	C	0.793659	-0.0098	0.0016	9.04247	8.41765	0.00235	na	CENPP;IPPK	na	IPPK;BICD2	IPPK	CENPP	IPPK	ECM2;BICD2	na	na	CENPP	BICD2	na	na	na	IPPK	BICD2;CENPP	ECM2
rs12004367	logTG	9	96970677	G	A	0.291349	0.0099	0.0014	11.8143	8.99071	0.02754	na	na	na	RP11-2B6.2;HIATL1	na	na	ZNF169	na	na	na	na	na	na	na	na	na	na	HIATL1;RP11-2B6.2;ZNF169
rs4592135	TC	9	100640410	G	A	0.330327	-0.0095	0.0015	9.61993	9.82363	0.00159	na	na	na	XPA;FOXE1	na	ANP32B	FOXE1	na	na	ANP32B;XPA	na	na	na	na	na	na	FOXE1	ANP32B;XPA
rs10984811	HDL	9	100784050	C	A	0.273455	0.0084	0.0014	8.70483	7.44512	0.01035	na	NANS;AL354726.1	na	na	na	TMOD1	ANP32B	ANP32B	HEMGN;C9orf156	ANP32B;XPA	na	ANP32B	na	na	na	na	ANP32B	AL354726.1;C9orf156;HEMGN;NANS;TMOD1
rs200675438	logTG	9	102119689	TA	T	0.605712	-0.0106	0.0015	11.7994	8.74524	0.1524	na	NAMA	na	NAMA	NAMA	COL15A1	SEC61B	na	NAMA	na	na	na	na	na	na	NAMA	na	COL15A1;SEC61B
rs10760688	HDL	9	102247368	G	A	0.360694	-0.0066	0.0013	6.41613	7.58797	2.51e-05	na	SEC61B	SEC61B	na	na	ALG2	SEC61B	na	na	na	na	na	na	na	na	na	SEC61B	ALG2
rs746125435	HDL	9	105805994	G	T	0.000460827	-0.4106	0.0536	13.7322	12.4002	1	na	na	na	na	na	na	CYLC2	na	na	na	na	na	na	na	na	na	na	CYLC2
rs149360185	TC	9	106526397	C	A	0.995731	0.0572	0.0104	7.42046	7.99502	0.04009	na	SMC2-AS1	na	na	na	na	SMC2	na	na	na	na	na	na	na	na	na	na	SMC2;SMC2-AS1
rs549466628	HDL	9	106532723	TA	T	0.993918	-0.0755	0.01	13.3613	10.6079	0.5339	na	na	na	na	na	na	SMC2	na	na	na	na	na	na	na	na	na	na	SMC2
rs186793936	HDL	9	107093784	G	T	0.998447	0.336	0.0196	65.1483	61.2965	0.07682	ABCA1	na	na	ABCA1	ABCA1	ABCA1	OR13F1	na	ABCA1	ABCA1	ABCA1	na	na	na	na	ABCA1	na	OR13F1
rs186793936	TC	9	107093784	G	T	0.998447	0.1753	0.0192	19.1651	15.5039	0.3006	ABCA1	na	na	NIPSNAP3A;NIPSNAP3B;ABCA1	NIPSNAP3A;ABCA1	ABCA1	OR13F1	na	OR13C3;ABCA1	ABCA1	ABCA1	na	na	na	na	ABCA1	na	NIPSNAP3A;NIPSNAP3B;OR13C3;OR13F1
rs2740488	HDL	9	107661742	C	A	0.269969	-0.0667	0.0014	494.666	475.63	4.35e-36	ABCA1	na	na	ABCA1	ABCA1	ABCA1	ABCA1	ABCA1	ABCA1	ABCA1	ABCA1	ABCA1	na	ABCA1	na	na	na	na
rs2740488	nonHDL	9	107661742	C	A	0.264705	-0.0322	0.0017	79.2822	78.2492	0.0001083	ABCA1	na	na	ABCA1	ABCA1	ABCA1	ABCA1	ABCA1	ABCA1	ABCA1	ABCA1	ABCA1	na	ABCA1	na	na	na	na
rs2740488	TC	9	107661742	C	A	0.270014	-0.0517	0.0013	345.136	309.368	2.9e-20	ABCA1	na	na	NIPSNAP3A;NIPSNAP3B;ABCA1	NIPSNAP3A;ABCA1	ABCA1	ABCA1	ABCA1	ABCA1;OR13C3	ABCA1	ABCA1	ABCA1	na	ABCA1	na	na	na	NIPSNAP3A;NIPSNAP3B;OR13C3
rs1883025	LDL	9	107664301	C	T	0.73899	0.0241	0.0014	65.683	59.08	0.004624	ABCA1	na	na	ABCA1	ABCA1	ABCA1	ABCA1	ABCA1	ABCA1	ABCA1	ABCA1	ABCA1	na	ABCA1	na	na	na	na
rs1800978	logTG	9	107665978	G	C	0.124108	-0.0248	0.0019	38.2119	31.022	0.5391	ABCA1	ABCA1	na	ABCA1	na	ABCA1	ABCA1	ABCA1	na	ABCA1	ABCA1	ABCA1	na	ABCA1	na	na	na	na
rs16924584	TC	9	108179115	G	T	0.0252744	0.0509	0.0048	25.5452	19.9274	0.8617	ABCA1	na	na	ABCA1	ABCA1	ABCA1	SLC44A1	na	ABCA1	ABCA1	ABCA1	na	na	na	na	ABCA1	na	SLC44A1
rs535372564	HDL	9	109062494	C	A	0.999101	0.2771	0.0338	15.6127	15.0687	0.9633	na	na	na	na	na	na	na	na	na	na	na	na	na	na	na	na	na	na
rs763060665	HDL	9	110112471	G	C	0.998523	0.1617	0.0294	7.42046	8.28867	1	na	na	na	na	na	RAD23B	RAD23B	na	na	na	RAD23B	na	na	na	na	na	RAD23B	na
rs11789974	logTG	9	110488875	C	A	0.966241	0.027	0.0035	13.9148	11.5444	0.07189	na	na	na	na	na	RAD23B	AL162389.1	KLF4	na	na	na	na	na	na	na	na	na	AL162389.1;KLF4;RAD23B
rs1967604	TC	9	110530324	G	A	0.734345	-0.0092	0.0013	11.8315	7.88236	0.5548	na	na	na	na	na	na	AL162389.1	KLF4	na	na	na	na	na	na	na	na	na	AL162389.1;KLF4
rs12000215	TC	9	112223059	G	A	0.337831	-0.009	0.0013	11.3546	8.36619	0.5763	na	na	na	PTPN3	PTPN3	na	PTPN3	PTPN3	PTPN3	FRRS1L	na	PTPN3	na	na	PTPN3	na	na	na
rs75113691	logTG	9	112245773	G	C	0.956031	0.0285	0.0031	19.4201	14.8309	0.7992	na	na	na	TMEM245;FRRS1L;PTPN3	TMEM245;PTPN3	na	PTPN3	na	PALM2-AKAP2;AKAP2	FRRS1L	na	na	na	na	na	na	PTPN3	AKAP2;FRRS1L;PALM2-AKAP2;TMEM245
rs397959160	nonHDL	9	112247790	GA	G	0.0540443	-0.0257	0.0035	12.6797	8.82642	0.6874	na	na	na	PTPN3	na	na	PTPN3	na	na	FRRS1L	na	na	na	na	na	na	PTPN3	na
rs2094453	HDL	9	112556911	C	T	0.803782	0.0118	0.0016	12.7842	9.40557	0.1142	na	PALM2;PALM2	PALM2;PALM2	na	na	na	PALM2	na	na	na	na	na	na	na	na	PALM2	na	na
rs2418130	HDL	9	113830547	C	T	0.641867	-0.0093	0.0013	12.0738	8.80243	0.1836	na	LPAR1	LPAR1	na	na	KIAA0368	LPAR1	na	na	na	na	na	na	na	na	na	LPAR1	KIAA0368
rs150611042	logTG	9	117083803	C	A	0.936712	0.0194	0.0028	11.3715	8.52105	0.3512	na	ORM2;ORM1	ORM2	ORM1	na	COL27A1	ORM1	ORM1	na	na	na	ORM1	na	na	ORM1	na	na	COL27A1;ORM2
rs56294298	LDL	9	117133524	G	A	0.921347	0.0189	0.0026	12.4418	9.7613	0.1236	na	ORM1	na	ORM1	na	AMBP	AKNA	ORM2;AKNA	na	na	na	AKNA	na	na	na	na	AKNA;ORM1	AMBP;ORM2
rs56294298	nonHDL	9	117133524	G	A	0.915651	0.0217	0.0029	13.138	9.97169	0.1677	na	na	na	ORM1	na	AMBP	AKNA	ORM2	na	na	na	na	na	na	na	na	na	AKNA;AMBP;ORM1;ORM2
rs10733608	HDL	9	117148430	G	T	0.531997	-0.0112	0.0012	19.9889	14.8484	0.1303	na	AKNA	AKNA	ORM1	na	DFNB31	AKNA	AKNA	na	na	na	AKNA	na	na	na	AKNA	na	DFNB31;ORM1
rs10733608	TC	9	117148430	G	T	0.531845	-0.0111	0.0012	19.6488	15.6949	0.08226	na	AKNA	AKNA	ORM1;AKNA;RP11-9M16.2	AKNA;RP11-9M16.2	AMBP	AKNA	AKNA	na	na	na	AKNA	na	na	AKNA	na	na	AMBP;ORM1;RP11-9M16.2
rs2416797	HDL	9	123480600	C	A	0.314741	0.0097	0.0013	13.0679	7.96084	0.8585	na	MEGF9	na	na	na	FBXW2	MEGF9	FBXW2	na	na	na	na	na	na	na	na	FBXW2;MEGF9	na
rs10984997	logTG	9	123481206	T	A	0.310534	-0.0117	0.0013	18.6464	12.5818	0.7402	na	AHCYP2;MEGF9	MEGF9	MEGF9;FBXW2	MEGF9	C5	MEGF9	na	na	na	na	na	na	na	na	MEGF9	na	AHCYP2;C5;FBXW2
rs4620350	HDL	9	126539944	G	A	0.090205	-0.0145	0.0022	10.3594	9.8065	0.002962	na	DENND1A	na	na	na	DENND1A	DENND1A	na	na	CRB2	DENND1A	na	na	na	na	DENND1A	na	na
rs80025019	TC	9	130758224	G	A	0.97821	-0.0418	0.0046	18.992	12.8723	0.7378	na	PIP5KL1	na	FPGS;GOLGA2;SWI5	FPGS;GOLGA2;SWI5	ENG	FAM102A	na	na	COQ4;LCN2;TRUB2	na	na	na	na	na	na	na	ENG;FAM102A;FPGS;GOLGA2;PIP5KL1;SWI5
rs7874186	nonHDL	9	130770031	G	A	0.938627	-0.0169	0.0031	7.30177	7.81358	0.0002677	na	na	na	na	na	ENG	FAM102A	FAM102A	na	COQ4;LCN2;TRUB2	na	FAM102A	na	na	na	na	FAM102A	ENG
rs13289095	nonHDL	9	131466489	G	T	0.864501	0.0245	0.0023	25.7687	21.3776	0.09024	na	na	na	PKN3;C9orf114	PKN3	ZER1	PKN3	CCBL1;ENDOG;LRRC8A;ZDHHC12;C9orf114	na	COQ4;TRUB2	na	C9orf114	na	na	na	na	C9orf114;PKN3	CCBL1;ENDOG;LRRC8A;ZDHHC12;ZER1
rs13289095	TC	9	131466489	G	T	0.866132	0.0272	0.0018	50.8639	41.2894	0.1557	na	PKN3;ZDHHC12;TBC1D13	ZDHHC12;PKN3	GOLGA2;SWI5;SET;PKN3;ZER1;TBC1D13;ENDOG;C9orf114;CCBL1;LRRC8A;PHYHD1;NUP188	GOLGA2;SWI5;PKN3;TBC1D13;ENDOG;C9orf114;CCBL1;LRRC8A	CRAT	PKN3	CCBL1;ENDOG;ZDHHC12	na	COQ4;TRUB2	na	CCBL1;ENDOG;ZDHHC12	na	na	na	PKN3	CCBL1;ENDOG;TBC1D13;ZDHHC12	C9orf114;CRAT;GOLGA2;LRRC8A;NUP188;PHYHD1;SET;SWI5;ZER1
rs9697210	LDL	9	131468740	G	A	0.864955	0.0293	0.0019	52.9275	43.8062	0.7526	na	PKN3;ZDHHC12;TBC1D13	PKN3;ZDHHC12	GOLGA2;SWI5;SET;PKN3;TBC1D13;ENDOG;C9orf114;CCBL1;LRRC8A;PHYHD1;NUP188	GOLGA2;SWI5;PKN3;TBC1D13;ENDOG;C9orf114;CCBL1;LRRC8A	CRAT	PKN3	CCBL1;ENDOG	na	COQ4;TRUB2	na	CCBL1;ENDOG	na	na	na	PKN3	CCBL1;ENDOG;TBC1D13	C9orf114;CRAT;GOLGA2;LRRC8A;NUP188;PHYHD1;SET;SWI5;ZDHHC12
rs6478851	HDL	9	131561110	G	A	0.728913	0.01	0.0014	12.039	8.0833	0.1625	na	ST6GALNAC4;ENDOG;TBC1D13;SPOUT1	TBC1D13	SWI5;SET;PKN3;TBC1D13;ENDOG;C9orf114;CCBL1;LRRC8A;PHYHD1;NUP188	SWI5;PKN3;TBC1D13;ENDOG;C9orf114;CCBL1;LRRC8A	SH3GLB2	TBC1D13	ENDOG;CCBL1;LRRC8A;TBC1D13;C9orf114	TBC1D13;ENDOG;C9orf114	COQ4;TRUB2	na	ENDOG;CCBL1;LRRC8A;TBC1D13;C9orf114	na	TBC1D13	ENDOG	C9orf114	CCBL1;LRRC8A	NUP188;PHYHD1;PKN3;SET;SH3GLB2;SPOUT1;ST6GALNAC4;SWI5
rs1147348	HDL	9	132214501	G	C	0.429302	-0.009	0.0013	11.3546	8.31241	0.2338	na	SPTAN1	na	NUP188;TOR1B;C9orf78;USP20	C9orf78	SH3GLB2	NTMT1	na	na	C9orf50;PTGES	na	na	na	na	na	na	na	C9orf78;NTMT1;NUP188;SH3GLB2;SPTAN1;TOR1B;USP20
rs2519093	HDL	9	136141870	C	T	0.816086	-0.0149	0.0016	19.9036	17.3769	0.03603	na	na	na	RALGDS;GBGT1;OBP2B;ABO;SURF6;MED22;RPL7A;SURF1;SURF4;STKLD1;REXO4;ADAMTS13;CACFD1;SLC2A6;TMEM8C;ADAMTSL2	RALGDS;GBGT1;ABO;SURF1;SURF4;STKLD1;ADAMTS13;ADAMTSL2	TSC1	SURF6	na	na	CACFD1;CEL	na	na	na	na	na	na	SURF6	ABO;ADAMTS13;ADAMTSL2;CACFD1;GBGT1;MED22;OBP2B;RALGDS;REXO4;RPL7A;SLC2A6;STKLD1;SURF1;SURF4;TMEM8C;TSC1
rs2519093	nonHDL	9	136141870	C	T	0.814511	-0.0655	0.0019	259.701	251.594	0.004282	na	na	na	RALGDS;GBGT1;OBP2B;ABO;MED22;RPL7A;SURF1;STKLD1;ADAMTS13;CACFD1;SLC2A6	RALGDS;GBGT1;ABO;SURF1;STKLD1	CEL	SURF6	na	na	CACFD1;CEL	na	na	na	na	na	na	na	ABO;ADAMTS13;CACFD1;CEL;GBGT1;MED22;OBP2B;RALGDS;RPL7A;SLC2A6;STKLD1;SURF1;SURF6
rs2519093	TC	9	136141870	C	T	0.814697	-0.0681	0.0015	449.331	404.566	0.002098	na	ABO	na	RALGDS;GBGT1;OBP2B;ABO;SURF6;MED22;RPL7A;SURF1;SURF4;STKLD1;ADAMTS13;CACFD1;SLC2A6;TMEM8C;ADAMTSL2	RALGDS;GBGT1;ABO;SURF1;SURF4;STKLD1;ADAMTS13;ADAMTSL2	SURF4	SURF6	na	na	CACFD1;CEL	SURF4	na	na	na	na	na	ABO;SURF4;SURF6	ADAMTS13;ADAMTSL2;CACFD1;GBGT1;MED22;OBP2B;RALGDS;RPL7A;SLC2A6;STKLD1;SURF1;TMEM8C
rs507666	LDL	9	136149399	G	A	0.817636	-0.0734	0.0016	458.75	431.396	0.001792	na	ABO	na	RALGDS;GBGT1;OBP2B;ABO;SURF6;MED22;RPL7A;SURF1;SURF4;STKLD1;REXO4;ADAMTS13;CACFD1;SLC2A6;TMEM8C;ADAMTSL2	RALGDS;GBGT1;ABO;SURF1;SURF4;STKLD1;ADAMTS13;ADAMTSL2	CEL	SURF6	na	na	CACFD1;CEL	na	na	na	na	na	na	ABO;SURF6	ADAMTS13;ADAMTSL2;CACFD1;CEL;GBGT1;MED22;OBP2B;RALGDS;REXO4;RPL7A;SLC2A6;STKLD1;SURF1;SURF4;TMEM8C
rs72619338	logTG	9	137175998	G	A	0.966964	0.0204	0.0039	6.77261	7.81712	0.07893	na	na	na	na	na	RXRA	RXRA	RXRA	na	na	RXRA	RXRA	na	na	na	RXRA	na	na
rs35182096	HDL	9	137268682	C	T	0.282783	0.0092	0.0015	9.06522	7.59928	0.005343	na	RXRA	na	na	na	RXRA	RXRA	RXRA	na	na	RXRA	RXRA	na	na	RXRA	na	na	na
rs10858248	nonHDL	9	139108324	G	A	0.487012	-0.0126	0.0015	16.3502	13.6166	0.1904	na	na	na	QSOX2;SDCCAG3;PMPCA;INPP5E;SEC16A;C9orf163	SDCCAG3;INPP5E;SEC16A;C9orf163	AGPAT2	QSOX2	na	na	AGPAT2	na	na	na	na	na	na	QSOX2	AGPAT2;C9orf163;INPP5E;PMPCA;SDCCAG3;SEC16A
rs10858248	TC	9	139108324	G	A	0.481704	-0.0119	0.0012	22.4531	16.9162	0.5786	na	QSOX2	QSOX2	QSOX2;PMPCA;INPP5E;SEC16A;C9orf163	PMPCA;INPP5E;SEC16A;C9orf163	AGPAT2	QSOX2	na	na	AGPAT2	na	na	na	na	na	QSOX2	na	AGPAT2;C9orf163;INPP5E;PMPCA;SEC16A
rs11999532	LDL	9	139371405	G	C	0.759344	0.0155	0.0015	24.3028	19.5032	0.8883	na	SEC16A;C9orf163;GPSM1;DNLZ	SEC16A	QSOX2;GPSM1;CARD9;SNAPC4;SDCCAG3;PMPCA;INPP5E;SEC16A;C9orf163	CARD9;SDCCAG3;PMPCA;INPP5E;SEC16A;C9orf163	AGPAT2	SEC16A	SEC16A;CARD9	C9orf163;SEC16A	AGPAT2	na	SEC16A;CARD9	na	SEC16A	na	C9orf163	CARD9;GPSM1	AGPAT2;DNLZ;INPP5E;PMPCA;QSOX2;SDCCAG3;SNAPC4
rs7037849	HDL	9	139973820	C	T	0.597563	-0.0088	0.0013	10.8878	7.83125	0.1253	na	DPP7;MAN1B1-DT;NDOR1;EGFL7;INPP5E;ENTR1;UAP1L1;NPDC1	ENTR1;MAN1B1-DT	na	na	AGPAT2	UAP1L1	UAP1L1	UAP1L1;DPP7;MAN1B1	ABCA2;AGPAT2;CLIC3;TMEM203	na	UAP1L1	na	na	UAP1L1	na	DPP7	AGPAT2;EGFL7;ENTR1;INPP5E;MAN1B1;MAN1B1-DT;NDOR1;NPDC1
rs6601924	TC	10	5247302	C	T	0.852747	0.0166	0.0017	21.797	17.7707	0.1369	na	na	na	AKR1C3;AKR1C4;RP11-445P17.8	AKR1C4	ASB13	AKR1C4	AKR1C3;AKR1C4	RP11-445P17.6;AKR1CL1;AKR1C4	na	na	AKR1C3;AKR1C4	na	na	AKR1C4	na	AKR1C3	AKR1CL1;ASB13;RP11-445P17.6;RP11-445P17.8
rs75406471	HDL	10	5257647	G	A	0.85176	0.0136	0.0017	14.9051	11.6967	0.06578	na	na	na	na	na	na	AKR1C4	AKR1C3;AKR1C4	RP11-445P17.6;AKR1CL1;AKR1C4	na	na	AKR1C4	na	na	na	AKR1C4	na	AKR1C3;AKR1CL1;RP11-445P17.6
rs140107293	logTG	10	5267191	G	A	0.144186	-0.0219	0.0018	33.3299	29.1688	0.0424	na	na	na	AKR1C3;AKR1C4;RP11-445P17.8	AKR1C4	na	AKR1C4	AKR1C3;AKR1C4	AKR1C4;RP11-445P17.6;AKR1CL1	na	na	AKR1C3;AKR1C4	na	na	AKR1C4	na	AKR1C3	AKR1CL1;RP11-445P17.6;RP11-445P17.8
rs263423	nonHDL	10	8089033	G	A	0.809066	0.0122	0.0019	9.86859	7.41123	0.3057	na	na	na	GATA3-AS1	na	ITIH2	GATA3	GATA3	ITIH5;ITIH2;KIN;GATA3	na	ITIH2	GATA3	na	na	na	GATA3	ITIH2	GATA3-AS1;ITIH5;KIN
rs2388486	TC	10	8099021	C	T	0.821767	0.011	0.0016	11.2077	8.00555	0.4739	na	na	na	GATA3-AS1	na	ITIH2	GATA3	GATA3	na	na	na	GATA3	na	na	na	na	GATA3	GATA3-AS1;ITIH2
rs7091423	HDL	10	13574659	G	C	0.563603	-0.0069	0.0013	6.95459	7.79568	4.63e-05	na	na	na	na	na	PHYH	BEND7	na	BEND7	OPTN;PHYH	na	na	na	na	na	na	BEND7	PHYH
rs7903259	LDL	10	17259642	G	C	0.43449	0.0148	0.0013	29.302	26.7471	0.01465	na	VIM-AS1	na	CUBN;RP11-406H21.2;TRDMT1;VIM	TRDMT1;VIM	CUBN	VIM	na	na	na	CUBN	na	na	na	na	na	CUBN;VIM	RP11-406H21.2;TRDMT1;VIM-AS1
rs7903259	nonHDL	10	17259642	G	C	0.446446	0.0157	0.0015	24.9105	19.8338	0.6493	na	na	na	CUBN;RP11-406H21.2;TRDMT1;VIM	TRDMT1;VIM	CUBN	VIM	VIM	na	na	CUBN	VIM	na	na	na	VIM	CUBN	RP11-406H21.2;TRDMT1
rs7903259	TC	10	17259642	G	C	0.444415	0.0186	0.0012	53.4598	47.7651	0.0002133	na	na	na	CUBN;RP11-406H21.2;TRDMT1;VIM;ST8SIA6	CUBN;TRDMT1;VIM	CUBN	VIM	VIM	na	na	CUBN	VIM	na	na	na	VIM	CUBN	RP11-406H21.2;ST8SIA6;TRDMT1
rs11254464	HDL	10	17265447	C	T	0.449464	0.0128	0.0013	22.1474	19.5353	0.02025	na	VIM-AS1	na	CUBN;RP11-406H21.2;TRDMT1;VIM	TRDMT1;VIM	VIM	VIM	VIM	na	na	VIM	VIM	na	na	VIM	na	na	CUBN;RP11-406H21.2;TRDMT1;VIM-AS1
rs10827239	HDL	10	33630848	G	A	0.0976257	-0.023	0.0021	27.1889	22.8585	0.04135	na	na	na	na	na	NRP1	NRP1	NRP1	na	na	NRP1	NRP1	na	na	na	NRP1	na	na
rs4934932	logTG	10	33633866	G	A	0.890803	-0.0175	0.002	17.6709	13.169	0.7324	na	na	na	NRP1	NRP1	NRP1	NRP1	NRP1	na	na	NRP1	NRP1	na	na	NRP1	na	na	na
rs12354765	LDL	10	43918823	T	A	0.769846	0.0107	0.0016	10.6439	8.11613	0.4052	na	RASGEF1A	na	ZNF487	na	na	ZNF487	ZNF487	RASGEF1A	ZNF32	na	na	na	na	na	ZNF487	RASGEF1A	na
rs7908745	LDL	10	45953767	G	A	0.309682	0.0097	0.0013	13.0679	8.64857	0.5441	na	na	na	na	na	na	MARCHF8	MARCHF8	MARCHF8	ALOX5	na	MARCHF8	na	na	na	MARCHF8	na	na
rs11394256	nonHDL	10	45957247	C	CA	0.779483	-0.0134	0.0019	11.7556	8.44049	0.5215	na	na	na	na	na	na	MARCHF8	MARCHF8;ALOX5	MARCHF8	ALOX5	na	MARCH8	na	na	na	MARCHF8	na	ALOX5
rs2291428	TC	10	45958856	G	C	0.776148	-0.0205	0.0014	47.8249	37.7649	0.732	na	na	na	OR13A1;ALOX5;MARCHF8;ZFAND4;FAM21C	OR13A1;ALOX5;ZFAND4;FAM21C	na	MARCHF8	MARCHF8;ALOX5	MARCHF8	ALOX5	na	MARCH8;ALOX5	na	na	MARCHF8	na	ALOX5	FAM21C;OR13A1;ZFAND4
rs11239551	HDL	10	46026107	G	A	0.778459	-0.0261	0.0015	67.0835	58.3838	0.7135	na	na	na	na	na	ALOX5	MARCHF8	ALOX5	na	ALOX5	na	na	na	na	na	na	ALOX5	MARCHF8
rs41274050	LDL	10	52573772	C	T	0.991511	-0.0733	0.0076	21.2861	17.8482	0.4639	na	na	na	na	na	A1CF	ASAH2B	na	ASAH2B;A1CF	ASAH2B;PRKG1;SGMS1	A1CF	na	na	na	na	na	A1CF;ASAH2B	na
rs41274050	logTG	10	52573772	C	T	0.991549	-0.0891	0.0075	31.8228	26.5664	0.4894	na	na	na	na	na	A1CF	ASAH2B	na	ASAH2B;A1CF	ASAH2B;PRKG1;SGMS1	A1CF	na	na	na	na	na	A1CF;ASAH2B	na
rs41274050	nonHDL	10	52573772	C	T	0.991259	-0.0854	0.0093	19.3767	15.6042	0.6809	na	na	na	na	na	A1CF	ASAH2B	na	ASAH2B;A1CF	ASAH2B;PRKG1;SGMS1	A1CF	na	na	na	na	na	A1CF;ASAH2B	na
rs41274050	TC	10	52573772	C	T	0.991504	-0.0812	0.0073	28.0148	23.6626	0.1166	na	na	na	na	na	A1CF	ASAH2B	na	ASAH2B;A1CF	ASAH2B;PRKG1;SGMS1	A1CF	na	na	na	na	na	A1CF;ASAH2B	na
rs1031101	TC	10	54533360	G	A	0.139884	0.0115	0.0017	10.8743	8.56663	0.6732	na	na	na	MBL2	na	na	MBL2	MBL2	MBL2	PRKG1	na	MBL2	na	na	MBL2	na	na	na
rs11003128	LDL	10	54534837	T	A	0.138533	0.0119	0.0018	10.4186	9.37641	0.3746	na	na	na	MBL2	na	na	MBL2	MBL2	MBL2	PRKG1	na	MBL2	na	na	MBL2	na	na	na
rs10826337	HDL	10	61409469	G	A	0.560736	0.011	0.0013	16.5786	13.8705	0.02485	na	SLC16A9	na	na	na	na	SLC16A9	na	na	na	na	na	na	na	na	na	SLC16A9	na
rs1171615	logTG	10	61469090	C	T	0.217229	-0.0153	0.0015	23.7027	18.0083	0.1422	na	CCDC6;SLC16A9	SLC16A9	SLC16A9	SLC16A9	na	SLC16A9	na	na	na	na	na	na	na	na	SLC16A9	na	CCDC6
rs2393730	HDL	10	63837006	G	A	0.607507	-0.0105	0.0013	15.1777	11.3489	0.5114	na	na	na	na	na	ARID5B	ARID5B	ARID5B	na	na	ARID5B	ARID5B	na	na	na	ARID5B	na	na
rs2393729	logTG	10	63837016	C	T	0.607503	0.0106	0.0013	15.4528	11.6164	0.781	na	na	na	ARID5B;RTKN2;RP11-120C12.3	ARID5B	na	ARID5B	ARID5B	na	na	na	ARID5B	na	na	na	ARID5B	na	RP11-120C12.3;RTKN2
rs7916868	HDL	10	64988931	T	A	0.509742	0.0108	0.0013	16.0106	11.8625	0.4778	na	na	na	NRBF2;JMJD1C;REEP3	NRBF2;REEP3	JMJD1C	JMJD1C	JMJD1C;REEP3;NRBF2	na	na	JMJD1C	JMJD1C;REEP3;NRBF2	na	na	JMJD1C	na	NRBF2;REEP3	na
rs10761750	LDL	10	65128619	G	A	0.538133	-0.0146	0.0013	28.5407	23.8991	0.8991	na	na	na	NRBF2;JMJD1C;REEP3	NRBF2;REEP3	JMJD1C	JMJD1C	REEP3;NRBF2;JMJD1C	JMJD1C	na	JMJD1C	REEP3;NRBF2;JMJD1C	na	JMJD1C	na	na	NRBF2;REEP3	na
rs7924036	logTG	10	65191645	G	T	0.496361	0.029	0.0013	109.507	102.252	0.7723	na	na	na	NRBF2;JMJD1C;REEP3;RP11-170M17.1	NRBF2;REEP3	JMJD1C	JMJD1C	JMJD1C;REEP3	na	na	JMJD1C	JMJD1C;REEP3	na	na	JMJD1C	na	REEP3	NRBF2;RP11-170M17.1
rs1977825	TC	10	70409357	C	T	0.144197	-0.0108	0.0018	8.70483	7.40092	0.02996	na	na	na	STOX1	STOX1	PBLD	TET1	CCAR1;TET1	CCAR1	na	na	TET1	na	na	na	na	CCAR1;TET1	PBLD;STOX1
rs17476364	LDL	10	71094504	C	T	0.0900142	-0.0265	0.0023	29.9892	25.9733	0.4959	na	na	na	na	na	HK1	HK1	na	na	HKDC1	HK1	na	na	na	na	na	HK1	na
rs17476364	nonHDL	10	71094504	C	T	0.0925757	-0.0257	0.0027	20.7553	16.8588	0.7911	na	na	na	na	na	HKDC1	HK1	HK1	na	HKDC1	na	HK1	na	na	na	na	HK1	HKDC1
rs17476364	TC	10	71094504	C	T	0.088474	-0.0298	0.0022	41.0742	35.434	0.3063	na	na	na	STOX1;HK1	STOX1;HK1	HK1	HK1	HK1	na	HKDC1	HK1	HK1	na	na	HK1	na	na	STOX1
rs9415951	HDL	10	71941078	G	A	0.380782	-0.0079	0.0013	8.91183	8.96166	0.01352	na	PPA1;TYSND1;SAR1A;AIFM2	na	na	na	EIF4EBP2	SAR1A	TYSND1;SAR1A	na	NODAL;PRF1	na	TYSND1;SAR1A	na	na	na	SAR1A	TYSND1	AIFM2;EIF4EBP2;PPA1
rs11000443	LDL	10	74665640	C	A	0.944373	0.03	0.0028	26.0593	26.0628	0.0001181	na	na	na	OIT3;P4HA1;FAM149B1	OIT3;P4HA1;FAM149B1	PLA2G12B	OIT3	PLA2G12B;OIT3;DNAJB12;MCU	PLA2G12B	DNAJC9;MCU	na	OIT3	na	na	na	OIT3;PLA2G12B	na	DNAJB12;FAM149B1;MCU;P4HA1
rs11000443	nonHDL	10	74665640	C	A	0.935477	0.0176	0.003	8.35199	10.5954	2.53e-05	na	na	na	na	na	PLA2G12B	OIT3	OIT3;PLA2G12B;DNAJB12;MCU;MICU1	na	DNAJC9;MCU	na	OIT3	na	na	na	na	OIT3;PLA2G12B	DNAJB12;MCU;MICU1
rs2394931	HDL	10	74666065	G	A	0.88887	0.016	0.0023	11.4575	8.61142	0.01617	na	na	na	OIT3;P4HA1;FAM149B1	OIT3;P4HA1;FAM149B1	na	OIT3	DNAJB12;OIT3;PLA2G12B;MCU	na	DNAJC9;MCU	na	OIT3	na	na	na	OIT3	na	DNAJB12;FAM149B1;MCU;P4HA1;PLA2G12B
rs7904738	logTG	10	74710484	G	C	0.875479	-0.0237	0.002	31.6672	26.3839	0.04143	na	na	na	OIT3;P4HA1;RP11-344N10.5;NUDT13;ECD;FAM149B1;DNAJC9;MRPS16;CFAP70;ANXA7;PPP3CB	OIT3;P4HA1;RP11-344N10.5;NUDT13;ECD;FAM149B1;DNAJC9;MRPS16;CFAP70;ANXA7	P4HA1	PLA2G12B	PLA2G12B	na	DNAJC9;MCU	P4HA1	PLA2G12B	na	na	na	na	P4HA1;PLA2G12B	ANXA7;CFAP70;DNAJC9;ECD;FAM149B1;MRPS16;NUDT13;OIT3;PPP3CB;RP11-344N10.5
rs7898735	TC	10	74712546	C	T	0.128409	-0.013	0.0019	11.1077	13.9418	9.68e-08	na	na	na	OIT3	OIT3	PLA2G12B	PLA2G12B	PLA2G12B	na	DNAJC9;MCU	PLA2G12B	PLA2G12B	na	na	na	PLA2G12B	na	OIT3
rs6480771	HDL	10	76861680	C	T	0.46949	-0.0083	0.0013	9.7649	7.3995	0.2389	na	DUSP13;VDAC2	na	na	na	KAT6B	DUSP13	na	SAMD8;DUSP13	na	na	na	na	na	na	DUSP13	na	KAT6B;SAMD8;VDAC2
rs3012042	logTG	10	77257376	C	T	0.855919	-0.0127	0.0018	11.7647	8.2341	0.8399	na	na	na	DUSP13;VDAC2	na	KAT6B	ZNF503	C10orf11	na	na	na	na	na	na	na	na	na	C10orf11;DUSP13;KAT6B;VDAC2;ZNF503
rs703966	HDL	10	80954251	G	A	0.610462	-0.0102	0.0013	14.3676	11.8208	0.04726	na	na	na	na	na	ZMIZ1	ZMIZ1	ZMIZ1	na	SFTPA1;SFTPA2	ZMIZ1	ZMIZ1	na	na	na	ZMIZ1	na	na
rs1782652	TC	10	81074125	T	A	0.585662	-0.0106	0.0013	15.4528	10.7039	0.4312	na	na	na	na	na	ZMIZ1	ZMIZ1	ZMIZ1	na	SFTPA1;SFTPA2	ZMIZ1	ZMIZ1	na	na	na	ZMIZ1	na	na
rs11002931	logTG	10	81094251	C	A	0.266331	0.0104	0.0014	12.9595	8.77001	0.7806	na	PPIF	PPIF	PPIF	na	ZMIZ1	PPIF	ZMIZ1	na	SFTPA1;SFTPA2	na	na	na	na	na	PPIF	ZMIZ1	na
rs7096909	nonHDL	10	82284512	T	A	0.823189	0.0132	0.002	10.386	7.61481	0.2404	na	na	na	TSPAN14	na	MAT1A	TSPAN14	TSPAN14	PLAC9;FAM213A;TSPAN14;ANXA11	ANXA11	na	TSPAN14	na	na	TSPAN14	na	na	ANXA11;FAM213A;MAT1A;PLAC9
rs7096909	TC	10	82284512	T	A	0.826677	0.011	0.0016	11.2077	7.63089	0.3765	na	na	na	TSPAN14	na	MAT1A	TSPAN14	TSPAN14	na	ANXA11	na	TSPAN14	na	na	na	TSPAN14	na	MAT1A
rs477418	LDL	10	89805410	C	A	0.969049	0.0235	0.0037	9.67074	8.92246	0.006251	na	na	na	na	na	PTEN	PTEN	na	na	na	PTEN	na	na	na	na	na	PTEN	na
rs477418	nonHDL	10	89805410	C	A	0.969588	0.0329	0.0043	13.7008	12.4773	0.01152	na	na	na	na	na	PTEN	PTEN	na	na	na	PTEN	na	na	na	na	na	PTEN	na
rs477418	TC	10	89805410	C	A	0.96906	0.0248	0.0035	11.8591	10.4591	0.01365	na	na	na	na	na	PTEN	PTEN	na	na	na	PTEN	na	na	na	na	na	PTEN	na
rs1412445	LDL	10	91002804	C	T	0.646569	0.0083	0.0013	9.7649	8.12345	0.05335	LIPA	LIPA	LIPA	LIPA;PANK1;RP11-80H5.7	LIPA;RP11-80H5.7	LIPA	LIPA	LIPA	LIPA;KIF20B	LIPA;PANK1	LIPA	LIPA	LIPA	na	na	na	na	KIF20B;PANK1;RP11-80H5.7
rs2250398	nonHDL	10	91010157	G	A	0.527891	-0.0101	0.0015	10.7804	9.24538	0.005223	LIPA	LIPA	na	LIPA	LIPA	LIPA	LIPA	LIPA	na	LIPA;PANK1	LIPA	LIPA	na	LIPA	na	na	na	na
rs1332326	TC	10	91011692	G	T	0.535455	-0.0106	0.0012	17.9931	13.3247	0.225	LIPA	LIPA	LIPA	LIPA;PANK1;RP11-80H5.7	LIPA	LIPA	LIPA	LIPA	LIPA	LIPA;PANK1	LIPA	LIPA	LIPA	na	na	na	na	PANK1;RP11-80H5.7
rs149590572	HDL	10	93575831	G	A	0.938641	0.0167	0.0027	9.2074	8.09344	0.003539	na	MARK2P9	na	na	na	TNKS2	TNKS2	TNKS2;BTAF1	BTAF1	PPP1R3C	TNKS2	TNKS2;BTAF1	na	na	na	TNKS2	BTAF1	MARK2P9
rs144316780	logTG	10	93622950	TGTTTTTTCA	T	0.93948	-0.0249	0.0029	17.0463	14.9213	0.03883	na	MARCH5	MARCH5	TNKS2;BTAF1;CPEB3;MARCH5	BTAF1;CPEB3;MARCH5	TNKS2	TNKS2	TNKS2	MARCH5	PPP1R3C	TNKS2	TNKS2	na	na	TNKS2	MARCH5	na	BTAF1;CPEB3
rs201503938	logTG	10	94215014	C	CTTGA	0.901767	-0.0243	0.0024	23.3686	21.5617	0.003926	na	CYP26C1;EXOC6;CYP26A1	CYP26C1	BTAF1;CPEB3;MARCH5;IDE;KIF11;HHEX;EXOC6	BTAF1;CPEB3;MARCH5;HHEX;EXOC6	BTAF1	IDE	na	na	na	BTAF1	na	na	na	na	na	BTAF1;EXOC6;IDE	CPEB3;CYP26A1;CYP26C1;HHEX;KIF11;MARCH5
rs17875327	HDL	10	94274809	G	A	0.100098	-0.0165	0.0022	13.1951	10.1547	0.04253	na	CYP26A1;CYP26C1;EXOC6	CYP26C1	EXOC6	EXOC6	HHEX	IDE	na	na	na	na	na	na	na	na	na	EXOC6	CYP26A1;CYP26C1;HHEX;IDE
rs2068888	LDL	10	94839642	G	A	0.537149	0.0169	0.0013	37.9124	33.9017	0.1362	na	FRA10AC1	na	EXOC6;CYP26C1;CYP26A1;FFAR4	EXOC6;CYP26C1;FFAR4	CYP26A1	CYP26A1	na	FFAR4	CEP55;FFAR4	CYP26A1	na	na	na	na	CYP26A1	FFAR4	CYP26C1;EXOC6;FRA10AC1
rs4418728	HDL	10	94839724	G	T	0.533193	-0.0196	0.0013	50.6388	45.5411	0.01457	na	FRA10AC1	na	EXOC6;CYP26C1;CYP26A1;FFAR4	EXOC6;CYP26C1;FFAR4	HHEX	CYP26A1	na	na	CEP55;FFAR4	na	na	na	na	na	na	CYP26A1	CYP26C1;EXOC6;FFAR4;FRA10AC1;HHEX
rs4418728	logTG	10	94839724	G	T	0.536869	0.0294	0.0013	112.514	104.302	0.5504	na	FRA10AC1	na	KIF11;HHEX;EXOC6;CYP26C1;CYP26A1;FFAR4	HHEX;EXOC6;CYP26C1;FFAR4	KIF11	CYP26A1	CYP26A1	na	CEP55;FFAR4	KIF11	CYP26A1	na	na	na	CYP26A1	KIF11	CYP26C1;EXOC6;FFAR4;FRA10AC1;HHEX
rs4418728	nonHDL	10	94839724	G	T	0.520246	0.0249	0.0015	61.1568	52.6117	0.5554	na	FRA10AC1	na	EXOC6;CYP26C1;CYP26A1	EXOC6;CYP26C1	CYP26A1	CYP26A1	na	FFAR4	CEP55;FFAR4	CYP26A1	na	na	na	na	CYP26A1	na	CYP26C1;EXOC6;FFAR4;FRA10AC1
rs4418728	TC	10	94839724	G	T	0.531581	0.0174	0.0012	46.9167	38.4674	0.7798	na	FRA10AC1	na	EXOC6;CYP26C1;CYP26A1;FFAR4	EXOC6;CYP26C1;FFAR4	HHEX	CYP26A1	na	FFAR4	CEP55;FFAR4	na	na	na	na	na	na	CYP26A1;FFAR4	CYP26C1;EXOC6;FRA10AC1;HHEX
rs8181419	HDL	10	95340811	G	T	0.173228	-0.0178	0.0017	24.9285	18.0332	0.8938	na	CYP26C1;CYP26A1	na	FFAR4;PLCE1	FFAR4	RBP4	FFAR4	RBP4;FFAR4	na	CEP55;FFAR4	na	na	na	na	na	FFAR4	RBP4	CYP26A1;CYP26C1;PLCE1
rs7091593	logTG	10	95342772	T	A	0.116163	0.0159	0.002	14.7293	13.274	0.01225	na	CYP26C1;CYP26A1	na	FFAR4;RBP4;PLCE1	FFAR4;RBP4	RBP4	FFAR4	RBP4;FFAR4	na	CEP55;FFAR4	RBP4	RBP4	na	na	na	FFAR4;RBP4	na	CYP26A1;CYP26C1;PLCE1
rs3891783	logTG	10	96015793	G	C	0.44649	-0.0106	0.0012	17.9931	12.0674	0.1693	na	PLCE1	na	PLCE1;NOC3L;HELLS	NOC3L	HELLS	PLCE1	PLCE1	PLCE1-AS1;PLCE1	HELLS	HELLS	PLCE1	na	PLCE1	na	na	HELLS	NOC3L;PLCE1-AS1
rs57866767	TC	10	96023077	C	T	0.447533	-0.0123	0.0012	23.9269	18.545	0.4633	na	PLCE1	na	PLCE1;CYP2C18;CYP2C19	CYP2C18;CYP2C19	CYP2C18	PLCE1	na	PLCE1-AS1;PLCE1	HELLS	CYP2C18	na	na	na	PLCE1	na	CYP2C18	CYP2C19;PLCE1-AS1
rs61886339	LDL	10	96032866	C	T	0.288768	-0.0101	0.0014	12.2659	8.86547	0.4611	na	FRA10AC1;PLCE1	na	PLCE1	na	CYP2C18	PLCE1	na	PLCE1-AS1;PLCE1	HELLS	na	na	na	na	PLCE1	na	na	CYP2C18;FRA10AC1;PLCE1-AS1
rs11187838	nonHDL	10	96038686	G	A	0.559581	0.0113	0.0015	13.3057	9.43557	0.879	na	PLCE1;CYP2C9	na	PLCE1;CYP2C19	CYP2C19	HELLS	PLCE1	na	PLCE1-AS1;PLCE1	HELLS	na	na	na	na	PLCE1	na	na	CYP2C19;CYP2C9;HELLS;PLCE1-AS1
rs1408579	HDL	10	101912194	C	T	0.589378	-0.0143	0.0013	27.4178	21.8026	0.5944	na	PHBP9;BLOC1S2;CWF19L1;ERLIN1	na	CPN1;ERLIN1;CHUK;CWF19L1;BLOC1S2;PKD2L1;SCD	CPN1;CHUK;CWF19L1;BLOC1S2;SCD	SCD	ERLIN1	CPN1;ERLIN1	ERLIN1	ABCC2;BLOC1S2;SCD;SCD	SCD	CPN1;ERLIN1	na	ERLIN1	na	na	BLOC1S2;CPN1;CWF19L1;SCD	CHUK;PHBP9;PKD2L1
rs1408579	logTG	10	101912194	C	T	0.579298	-0.01	0.0013	13.8401	10.5871	0.03067	na	BLOC1S2;PHBP9;ERLIN1;CWF19L1	na	ERLIN1;CHUK;CWF19L1;BLOC1S2	ERLIN1;CWF19L1;BLOC1S2	SCD	ERLIN1	CPN1;ERLIN1	ERLIN1;SEC31B	ABCC2;BLOC1S2;SCD;SCD	na	ERLIN1	na	ERLIN1	na	na	BLOC1S2;CWF19L1	CHUK;CPN1;PHBP9;SCD;SEC31B
rs17668357	nonHDL	10	102003906	G	C	0.630452	-0.0129	0.0016	15.1264	12.2015	0.1633	na	CWF19L1;SCD;PHBP9;BLOC1S2;ERLIN1	SCD;CWF19L1;BLOC1S2;PHBP9	CPN1;ERLIN1;CHUK;CWF19L1;BLOC1S2;PKD2L1;SCD	CPN1;ERLIN1;CHUK;CWF19L1;BLOC1S2;SCD	ABCC2	CWF19L1	CPN1;ERLIN1	na	ABCC2;BLOC1S2;SCD;SCD	na	CPN1;ERLIN1	na	na	na	CWF19L1;ERLIN1	BLOC1S2;CPN1;SCD	ABCC2;CHUK;PHBP9;PKD2L1
rs17668357	TC	10	102003906	G	C	0.640007	-0.016	0.0013	34.0844	27.8678	0.2201	na	CWF19L1;PHBP9;BLOC1S2;ERLIN1	CWF19L1;BLOC1S2;PHBP9	CPN1;ERLIN1;CHUK;CWF19L1;BLOC1S2;PKD2L1;SCD	CPN1;ERLIN1;CHUK;CWF19L1;BLOC1S2;SCD	ABCC2	CWF19L1	CPN1;ERLIN1	na	ABCC2;BLOC1S2;SCD;SCD	na	CPN1;ERLIN1	na	na	na	CWF19L1;ERLIN1	BLOC1S2;CPN1	ABCC2;CHUK;PHBP9;PKD2L1;SCD
rs603424	LDL	10	102075479	G	A	0.795029	-0.0154	0.0017	18.8799	14.9156	0.8128	na	SCD;SEMA4G	SCD	CPN1;ERLIN1;CHUK;CWF19L1;BLOC1S2;PKD2L1;SCD	CPN1;CHUK;CWF19L1;BLOC1S2;SCD	ABCC2	PKD2L1	na	na	ABCC2;BLOC1S2;SCD;SCD	na	na	na	na	na	na	PKD2L1;SCD	ABCC2;BLOC1S2;CHUK;CPN1;CWF19L1;ERLIN1;SEMA4G
rs1057050	logTG	10	104142294	G	A	0.943136	0.0276	0.0027	23.8022	19.1852	0.1953	na	GBF1	GBF1	C10orf76;HPS6;LDB1;PPRC1;ELOVL3;GBF1;NFKB2;PSD;TMEM180	LDB1;PPRC1;GBF1;NFKB2	GBF1	GBF1	ELOVL3;LDB1;GBF1;C10orf76;PPRC1;NFKB2	na	CYP17A1;HPS6;PITX3	GBF1	ELOVL3;LDB1;GBF1;C10orf76;PPRC1;NFKB2	na	GBF1	na	na	C10orf76;ELOVL3;LDB1;NFKB2;PPRC1	HPS6;PSD;TMEM180
rs2803619	HDL	10	113934384	G	C	0.264378	0.0319	0.0014	114.197	101.602	0.07134	na	GPAM	na	GPAM	GPAM	na	GPAM	GPAM	GPAM	ACSL5;GPAM	na	GPAM	na	GPAM	na	na	na	na
rs2803619	logTG	10	113934384	G	C	0.265607	-0.0175	0.0014	35.127	28.7039	0.1877	na	GPAM	na	GPAM;TECTB;ACSL5;ZDHHC6;VTI1A	GPAM;TECTB;ZDHHC6;VTI1A	GPAM	GPAM	GPAM	GPAM	ACSL5;GPAM	GPAM	GPAM	GPAM	na	na	na	na	ACSL5;TECTB;VTI1A;ZDHHC6
rs2803619	TC	10	113934384	G	C	0.263864	0.027	0.0013	95.0853	78.03	0.06641	na	GPAM	na	GPAM;ACSL5;ZDHHC6;VTI1A	GPAM;ZDHHC6;VTI1A	ACSL5	GPAM	GPAM	GPAM	ACSL5;GPAM	ACSL5	GPAM	na	GPAM	na	na	ACSL5	VTI1A;ZDHHC6
rs2792751	LDL	10	113940329	C	T	0.734276	-0.0253	0.0014	72.2716	63.4387	0.165	na	GPAM	na	GPAM	GPAM	ACSL5	GPAM	GPAM	GPAM	ACSL5;GPAM	na	GPAM	na	GPAM	na	na	na	ACSL5
rs10787429	nonHDL	10	113949664	C	T	0.73193	-0.0178	0.0017	24.9285	21.3577	0.05362	na	GPAM	na	GPAM;ZDHHC6;VTI1A	GPAM;ZDHHC6;VTI1A	GPAM	GPAM	GPAM	GPAM	ACSL5;GPAM	GPAM	GPAM	GPAM	na	na	na	na	VTI1A;ZDHHC6
rs7094463	TC	10	114711983	G	A	0.530933	0.0102	0.0012	16.7222	12.2942	0.7756	na	AL158212.2	na	VTI1A	VTI1A	TCF7L2	TCF7L2	TCF7L2	na	na	TCF7L2	TCF7L2	na	na	na	TCF7L2	na	AL158212.2;VTI1A
rs72823013	HDL	10	115786233	G	A	0.896277	-0.0312	0.0021	49.2039	42.5055	0.7895	na	ADRB1;VWA2	ADRB1	ADRB1	na	na	ADRB1	na	na	na	na	na	na	na	na	ADRB1	na	VWA2
rs72823013	nonHDL	10	115786233	G	A	0.894164	0.0206	0.0025	15.7639	14.6296	0.1355	na	VWA2;ADRB1	ADRB1	ADRB1	na	HABP2	ADRB1	na	na	na	na	na	na	na	na	ADRB1	na	HABP2;VWA2
rs17875424	LDL	10	115798268	TAA	T	0.894178	0.0148	0.0022	10.7623	9.35859	0.3066	na	ADRB1;VWA2	ADRB1	ADRB1	na	HABP2	ADRB1	na	na	na	na	na	na	na	na	ADRB1	na	HABP2;VWA2
rs1801253	logTG	10	115805056	G	C	0.267597	0.0107	0.0014	13.6727	9.78944	0.6235	na	ADRB1	na	ADRB1	na	na	ADRB1	ADRB1	ADRB1	na	na	ADRB1	na	ADRB1	na	na	na	na
rs4751996	LDL	10	118397894	G	A	0.516049	0.0158	0.0013	33.2618	29.7066	0.2566	na	PNLIPRP2	PNLIPRP2	na	na	na	C10orf82	PNLIPRP2	PNLIPRP2	PNLIP;PNLIPRP2	na	PNLIPRP2	na	na	na	PNLIPRP2	na	C10orf82
rs4751996	TC	10	118397894	G	A	0.50769	0.0126	0.0012	25.0636	19.2831	0.5573	na	PNLIPRP2	PNLIPRP2	na	na	na	C10orf82	PNLIPRP2	PNLIPRP2	PNLIP;PNLIPRP2	na	PNLIPRP2	na	na	na	PNLIPRP2	na	C10orf82
rs7910135	nonHDL	10	118398046	C	A	0.497723	-0.017	0.0015	29.0471	24.3517	0.2192	na	PNLIPRP2	PNLIPRP2	na	na	na	C10orf82	PNLIPRP2	PNLIPRP2	PNLIP;PNLIPRP2	na	PNLIPRP2	na	na	na	PNLIPRP2	na	C10orf82
rs11197783	HDL	10	118407116	T	A	0.464157	0.0106	0.0013	15.4528	12.8388	0.2099	na	PNLIPRP2	na	na	na	na	C10orf82	PNLIPRP2	PNLIPRP2	PNLIP;PNLIPRP2	na	PNLIPRP2	na	na	na	PNLIPRP2	na	C10orf82
rs12772930	logTG	10	120493295	G	A	0.680953	-0.01	0.0014	12.039	8.75264	0.6158	na	CACUL1	CACUL1	CACUL1	CACUL1	EIF3A	CACUL1	CACUL1	na	PRDX3;PRLHR	na	na	na	na	CACUL1	na	na	EIF3A
rs2289307	TC	10	121582556	C	T	0.324209	-0.0093	0.0013	12.0738	8.52912	0.3988	na	SEC23IP;INPP5F	na	MCMBP;SEC23IP	SEC23IP	TIAL1	INPP5F	MCMBP;SEC23IP	SEC23IP;INPP5F;MCMBP	BAG3;TIAL1	na	MCMBP;SEC23IP	na	na	SEC23IP	INPP5F;MCMBP	na	TIAL1
rs9420286	HDL	10	121641900	G	A	0.382374	-0.0088	0.0013	10.8878	7.304	0.7213	na	INPP5F	na	na	na	BAG3	MCMBP	MCMBP;SEC23IP	BAG3	BAG3;TIAL1	BAG3	MCMBP	na	na	na	na	BAG3;MCMBP	INPP5F;SEC23IP
rs73362918	TC	10	122853958	G	T	0.120415	-0.0133	0.0019	11.5918	8.68539	0.2344	na	ATE1-AS1	na	FGFR2	FGFR2	FGFR2	WDR11	na	na	na	FGFR2	na	na	na	na	na	FGFR2	ATE1-AS1;WDR11
rs10886863	HDL	10	122929493	C	T	0.917523	-0.0287	0.0025	29.7792	24.7433	0.001926	na	na	na	na	na	FGFR2	WDR11	na	na	na	na	na	na	na	na	na	na	FGFR2;WDR11
rs10886863	logTG	10	122929493	C	T	0.923936	0.0284	0.0027	25.1489	20.4222	0.1219	na	na	na	LINC01153	na	FGFR2	WDR11	na	na	na	na	na	na	na	na	na	na	FGFR2;LINC01153;WDR11
rs7904973	LDL	10	124693587	G	T	0.435058	-0.0202	0.0013	53.7201	49.8222	0.3069	na	C10orf88;CUZD1;FAM24B	C10orf88	CUZD1;FAM24B;FAM24A;C10orf88;PSTK;IKZF5;ACADSB	CUZD1;C10orf88;IKZF5;ACADSB	na	C10orf88	CUZD1	na	HMX3	na	CUZD1	na	na	na	C10orf88;CUZD1	FAM24B	ACADSB;FAM24A;IKZF5;PSTK
rs7904973	nonHDL	10	124693587	G	T	0.433323	-0.0195	0.0015	37.9124	32.4117	0.4031	na	FAM24B;C10orf88;CUZD1	FAM24B;C10orf88	CUZD1;FAM24B;FAM24A;C10orf88;PSTK;IKZF5;ACADSB	CUZD1;C10orf88;IKZF5	na	C10orf88	CUZD1	na	HMX3	na	CUZD1	na	na	na	C10orf88;CUZD1	FAM24B	ACADSB;FAM24A;IKZF5;PSTK
rs7904973	TC	10	124693587	G	T	0.434946	-0.0192	0.0012	56.8936	49.227	0.1607	na	C10orf88;FAM24B;CUZD1	C10orf88	CUZD1;FAM24B;FAM24A;C10orf88;PSTK;IKZF5;ACADSB	CUZD1;C10orf88;IKZF5;ACADSB	na	C10orf88	CUZD1	na	HMX3	na	CUZD1	na	na	na	C10orf88;CUZD1	FAM24B	ACADSB;FAM24A;IKZF5;PSTK
rs4962724	HDL	10	126733319	G	A	0.269867	-0.0101	0.0014	12.2659	9.13133	0.3618	na	na	na	na	na	CTBP2	CTBP2	CTBP2	CTBP2	na	CTBP2	CTBP2	na	na	CTBP2	na	na	na
rs1133400	logTG	10	134459388	G	A	0.213481	0.0121	0.0015	15.1412	10.9519	0.2419	na	na	na	na	na	INPP5A	INPP5A	na	INPP5A	na	INPP5A	na	na	na	na	INPP5A	na	na
rs566663060	logTG	10	135436812	C	CGCTTTCCTCTCT	0.0443636	0.0252	0.0041	9.10078	10.2366	0.001028	na	na	na	na	na	FUOM	FRG2B	na	na	PAOX	na	na	na	na	na	na	na	FRG2B;FUOM
rs117291242	logTG	11	380315	C	T	0.965112	-0.0244	0.0037	10.3702	8.03657	0.04138	na	na	na	PHRF1	na	PNPLA2	B4GALNT4	PKP3;ANO9	SIGIRR;PKP3;ANO9	IRF7;LRRC56;PHRF1;SIRT3	na	PKP3;ANO9	na	na	na	na	ANO9;PKP3	B4GALNT4;PHRF1;PNPLA2;SIGIRR
rs140201358	HDL	11	823586	G	C	0.0123354	-0.0556	0.006	19.7166	16.0369	0.1	na	na	na	DEAF1;EPS8L2;CRACR2B	EPS8L2;CRACR2B	PNPLA2	PNPLA2	PNPLA2	AP006621.8;PNPLA2;EFCAB4A	AP2A2;IRF7;LRRC56;MUC2;PHRF1	PNPLA2	PNPLA2	na	na	PNPLA2	na	na	AP006621.8;CRACR2B;DEAF1;EFCAB4A;EPS8L2
rs151191319	LDL	11	1081287	G	A	0.969584	0.03	0.0038	14.5362	11.0207	0.5693	na	na	na	DEAF1;EPS8L2;CRACR2B	EPS8L2;CRACR2B	PNPLA2	MUC2	MUC2	SLC25A22	AP2A2;IRF7;MUC2;PHRF1	na	MUC2	na	na	na	na	MUC2	CRACR2B;DEAF1;EPS8L2;PNPLA2;SLC25A22
rs440150	HDL	11	2936657	G	A	0.09547	-0.0228	0.0021	26.7342	20.9396	0.1731	na	na	na	PHLDA2;NAP1L4	PHLDA2	CDKN1C	SLC22A18	na	na	na	na	na	na	na	na	na	na	CDKN1C;NAP1L4;PHLDA2;SLC22A18
rs1661052	TC	11	2942593	G	A	0.095516	-0.0216	0.0021	24.0876	19.92	0.07971	na	SLC22A18	na	SLC22A18;PHLDA2;NAP1L4;CARS	PHLDA2;NAP1L4;CARS	SLC22A18	SLC22A18	SLC22A18	na	na	SLC22A18	SLC22A18	na	SLC22A18	na	na	na	CARS;NAP1L4;PHLDA2
rs188513096	LDL	11	4993424	T	A	0.998802	0.1919	0.0253	13.4782	11.5713	0.3065	na	na	na	HBG2;OR51B4	HBG2	HBB	MMP26	na	CoTC_ribozyme;HBB;OR52R1	na	HBB	na	na	na	na	na	HBB	CoTC_ribozyme;HBG2;MMP26;OR51B4;OR52R1
rs188513096	nonHDL	11	4993424	T	A	0.998488	0.1805	0.0278	10.0744	7.54004	0.8581	na	na	na	HBG2;OR51B4	HBG2	na	MMP26	na	CoTC_ribozyme;HBB;OR52R1	na	na	na	na	na	na	na	na	CoTC_ribozyme;HBB;HBG2;MMP26;OR51B4;OR52R1
rs11549407	TC	11	5248004	G	A	0.999144	0.4299	0.0326	38.9826	31.6432	0.06503	na	na	na	HBG2;OR51B4;OR52D1;UBQLNL;TRIM34;TRIM5;TRIM22	HBG2;TRIM34;TRIM5;TRIM22	na	HBB	na	CoTC_ribozyme;HBB	OR52H1	na	na	na	na	na	na	HBB	CoTC_ribozyme;HBG2;OR51B4;OR52D1;TRIM22;TRIM34;TRIM5;UBQLNL
rs11601507	LDL	11	5701074	C	A	0.926204	-0.0415	0.0028	48.9727	42.6473	0.1821	na	na	na	HBG2;OR51B4;OR52D1;UBQLNL;TRIM34;TRIM5;TRIM22	HBG2;TRIM34;TRIM5;TRIM22	HBB	TRIM5	TRIM5	TRIM5;OR56A3;HBB	OR52H1	na	TRIM5	na	na	TRIM5	na	HBB	HBG2;OR51B4;OR52D1;OR56A3;TRIM22;TRIM34;UBQLNL
rs11601507	nonHDL	11	5701074	C	A	0.921023	-0.0413	0.0034	33.2257	27.8352	0.0796	na	na	na	HBG2;OR51B4;UBQLNL;TRIM34;TRIM5;TRIM22	HBG2;TRIM34;TRIM5;TRIM22	na	TRIM5	na	TRIM5;OR52N1;OR56A3;HBB	OR52H1	na	na	na	na	na	TRIM5	na	HBB;HBG2;OR51B4;OR52N1;OR56A3;TRIM22;TRIM34;UBQLNL
rs189043145	TC	11	6092869	G	A	0.993974	-0.0053	0.0098	0.230155	9.01636	0.0236	na	na	na	TRIM34;TRIM5;TRIM22	TRIM34;TRIM5;TRIM22	HPX	OR56B4	na	TRIM5;OR56A3;OR52N1	SMPD1	na	na	na	na	na	na	TRIM5	HPX;OR52N1;OR56A3;OR56B4;TRIM22;TRIM34
rs2923078	HDL	11	10381766	T	A	0.338617	-0.0118	0.0013	18.952	14.236	0.02919	na	na	na	ADM;AMPD3	na	SBF2	AMPD3	AMPD3	na	na	na	AMPD3	na	na	na	AMPD3	na	ADM;SBF2
rs11042906	logTG	11	10665235	C	T	0.748682	0.0138	0.0015	19.4462	16.2832	0.08953	na	LYVE1;GALNT18	na	LYVE1;MRVI1	na	SBF2	MRVI1	na	MRVI1	na	na	na	na	na	na	MRVI1	LYVE1	GALNT18;SBF2
rs11022130	TC	11	12071547	G	A	0.242528	0.0095	0.0014	10.9374	7.3508	0.3026	na	MICAL2	MICAL2	DKK3;MICAL2	MICAL2	na	DKK3	na	MICAL2	USP47	na	na	na	na	na	MICAL2	DKK3	na
rs10765918	nonHDL	11	12071855	G	A	0.27025	0.0111	0.0017	10.1803	7.90833	0.04715	na	MICAL2	MICAL2	MICAL2	MICAL2	na	DKK3	na	DKK3;MICAL2	USP47	na	na	na	na	na	MICAL2	DKK3	na
rs6486121	HDL	11	13355770	C	T	0.418	0.0091	0.0013	11.5918	7.97055	0.7526	na	na	na	na	na	ARNTL	ARNTL	ARNTL	TEAD1	ARNTL;FAR1	ARNTL	ARNTL	na	na	na	ARNTL	na	TEAD1
rs6486122	logTG	11	13361524	C	T	0.333896	-0.017	0.0013	38.3505	31.4279	0.1309	na	na	na	ARNTL	ARNTL	ARNTL	ARNTL	ARNTL	na	ARNTL;FAR1	ARNTL	ARNTL	na	na	ARNTL	na	na	na
rs1528662	logTG	11	13970901	G	T	0.965769	0.0243	0.0039	9.33334	8.12289	0.09304	na	na	na	RRAS2	RRAS2	na	FAR1	na	COPB1	FAR1	na	na	na	na	na	na	na	COPB1;FAR1;RRAS2
rs2618514	HDL	11	14012524	C	T	0.513973	0.0088	0.0013	10.8878	7.75089	0.8843	na	na	na	COPB1	COPB1	na	FAR1	na	na	FAR1	na	na	na	na	na	na	na	COPB1;FAR1
rs150090666	HDL	11	14865399	C	T	0.99906	-0.3422	0.0249	42.2509	35.9401	0.1631	na	na	na	COPB1	COPB1	PDE3B	PDE3B	na	PDE3B	na	PDE3B	na	na	na	na	PDE3B	na	COPB1
rs150090666	logTG	11	14865399	C	T	0.999064	0.3025	0.0249	33.2339	27.8895	0.741	na	na	na	RRAS2	RRAS2	PDE3B	PDE3B	na	PDE3B;COPB1	na	PDE3B	na	na	na	na	PDE3B	na	COPB1;RRAS2
rs150090666	nonHDL	11	14865399	C	T	0.998986	0.2073	0.0317	10.2093	8.29321	1	na	COPB1	COPB1	na	na	CYP2R1	PDE3B	na	PDE3B	na	na	na	na	na	na	na	PDE3B	COPB1;CYP2R1
rs214080	TC	11	17299762	G	A	0.613151	0.0098	0.0012	15.4989	11.0289	0.1113	na	NUCB2;OR7E14P	NUCB2;OR7E14P	PIK3C2A;NUCB2	NUCB2	PIK3C2A	NUCB2	NUCB2;PIK3C2A	na	PIK3C2A;USH1C	PIK3C2A	NUCB2;PIK3C2A	na	na	NUCB2	PIK3C2A	na	OR7E14P
rs10832954	nonHDL	11	18643559	G	A	0.314743	-0.0205	0.0016	36.8552	31.2574	0.1083	na	SPTY2D1	SPTY2D1	HPS5;LDHAL6A;TSG101;UEVLD;SPTY2D1-AS1;SPTY2D1	HPS5;TSG101;UEVLD;SPTY2D1-AS1;SPTY2D1	TSG101	SPTY2D1	SPTY2D1	na	SAA1;SAA1	TSG101	SPTY2D1	na	na	SPTY2D1	na	TSG101	HPS5;LDHAL6A;SPTY2D1-AS1;UEVLD
rs10832954	TC	11	18643559	G	A	0.328471	-0.0194	0.0013	49.6322	42.1635	0.04134	na	SPTY2D1	SPTY2D1	HPS5;LDHAL6A;TSG101;UEVLD;SPTY2D1-AS1;SPTY2D1	HPS5;TSG101;UEVLD;SPTY2D1-AS1;SPTY2D1	na	SPTY2D1	SPTY2D1	na	SAA1;SAA1	na	SPTY2D1	na	na	SPTY2D1	na	na	HPS5;LDHAL6A;SPTY2D1-AS1;TSG101;UEVLD
rs10832956	LDL	11	18645668	C	T	0.677354	0.0193	0.0014	42.5077	37.1436	0.2198	na	SPTY2D1	SPTY2D1	LDHAL6A;TSG101;UEVLD;SPTY2D1-AS1;SPTY2D1	TSG101;UEVLD;SPTY2D1-AS1;SPTY2D1	na	SPTY2D1	SPTY2D1	na	SAA1;SAA1	na	SPTY2D1	na	na	SPTY2D1	na	na	LDHAL6A;SPTY2D1-AS1;TSG101;UEVLD
rs72887658	logTG	11	26197972	T	A	0.0582414	0.0206	0.0027	13.6281	10.3584	0.08882	na	ANO3;AC099687.1;SLC5A12	AC099687.1;SLC5A12	ANO3	na	na	ANO3	na	na	na	na	na	na	na	na	ANO3	na	AC099687.1;SLC5A12
rs1519480	logTG	11	27675712	C	T	0.352902	0.0142	0.0013	27.0486	21.2177	0.2713	na	BDNF	na	CCDC34;LGR4;LIN7C;BDNF;KIF18A;METTL15	CCDC34	LGR4	BDNF	na	na	na	LGR4	na	na	na	na	BDNF	LGR4	CCDC34;KIF18A;LIN7C;METTL15
rs2353487	HDL	11	27690399	C	T	0.357079	-0.0145	0.0013	28.1638	21.5918	0.4595	na	BDNF	na	na	na	LGR4	BDNF	na	na	na	na	na	na	na	na	na	BDNF	LGR4
rs2035837	HDL	11	29200527	C	T	0.163416	0.0129	0.0017	13.4891	9.4916	0.8151	na	na	na	na	na	na	na	na	na	na	na	na	na	na	na	na	na	na
rs75160368	logTG	11	30402714	G	A	0.918524	0.0165	0.0024	11.2077	7.8711	0.3634	na	AC124657.1;RPL12P30;ARL14EP	na	LINC01616;RP11-624D11.2;ARL14EP	ARL14EP	na	MPPED2	na	na	na	na	na	na	na	na	na	ARL14EP	AC124657.1;LINC01616;MPPED2;RP11-624D11.2;RPL12P30
rs11031793	HDL	11	32470828	C	T	0.546539	0.0113	0.0013	17.4496	13.5717	0.853	na	WT1-AS	na	na	na	na	WT1	na	na	na	na	na	na	na	na	na	na	WT1;WT1-AS
rs5791099	HDL	11	36328427	TA	T	0.343177	0.0102	0.0015	10.9804	7.33009	0.9398	na	PRR5L	na	na	na	TRAF6	PRR5L	na	PRR5L	na	na	na	na	na	na	PRR5L	na	TRAF6
rs77403571	HDL	11	45913607	G	A	0.944985	-0.035	0.0029	32.8123	28.7008	0.1302	na	na	na	GYLTL1B	GYLTL1B	DGKZ	MAPK8IP1	CRY2;SLC35C1	na	MAPK8IP1	na	na	na	na	na	na	na	CRY2;DGKZ;GYLTL1B;MAPK8IP1;SLC35C1
rs61884130	TC	11	46241757	C	T	0.97346	0.0336	0.004	16.3502	11.6658	0.9533	na	na	na	GYLTL1B;CTD-2589M5.5;DGKZ;MDK;CHRM4;AMBRA1;HARBI1;ATG13	GYLTL1B;CTD-2589M5.5;DGKZ;MDK;CHRM4;HARBI1;ATG13	F2	CREB3L1	F2;AMBRA1;SLC35C1;PEX16;ARHGAP1;PHF21A;DGKZ;ATG13;CKAP5	na	MAPK8IP1	na	AMBRA1;DGKZ;ATG13	na	na	na	na	AMBRA1;ATG13;DGKZ;F2	ARHGAP1;CHRM4;CKAP5;CREB3L1;CTD-2589M5.5;GYLTL1B;HARBI1;MDK;PEX16;PHF21A;SLC35C1
rs149903077	nonHDL	11	46349696	G	T	0.990315	0.0601	0.0086	11.5558	8.6492	0.2555	na	na	na	F2	na	F2	DGKZ	na	na	MAPK8IP1	F2	na	na	na	na	na	F2	DGKZ
rs3758669	logTG	11	47272579	G	A	0.349524	-0.0227	0.0013	67.5509	56.1351	0.2408	na	NR1H3;ACP2;DDB2;AC090589.1	ACP2	CKAP5;LRP4;C11orf49;ARFGAP2;PACSIN3;DDB2;ACP2;NR1H3;MADD;MYBPC3;SPI1;SLC39A13;PSMC3;RAPSN;CELF1;NDUFS3;PTPMT1;KBTBD4;FAM180B;C1QTNF4;MTCH2;AGBL2;FNBP4	CKAP5;LRP4;ARFGAP2;PACSIN3;DDB2;ACP2;NR1H3;MADD;MYBPC3;SPI1;SLC39A13;PSMC3;RAPSN;CELF1;NDUFS3;PTPMT1;FAM180B;C1QTNF4;MTCH2;AGBL2;FNBP4	NR1H3	NR1H3	NR1H3;MYBPC3;ACP2	NR1H3;ACP2	NR1H3	NR1H3	NR1H3;MYBPC3;ACP2	NR1H3	na	ACP2	na	DDB2;MYBPC3	AC090589.1;AGBL2;ARFGAP2;C11orf49;C1QTNF4;CELF1;CKAP5;FAM180B;FNBP4;KBTBD4;LRP4;MADD;MTCH2;NDUFS3;PACSIN3;PSMC3;PTPMT1;RAPSN;SLC39A13;SPI1
rs3758673	HDL	11	47278917	C	T	0.640889	-0.0388	0.0013	195.007	172.559	0.0001241	na	ACP2;NR1H3;DDB2;AC090589.1	ACP2	LRP4;C11orf49;AGBL2	LRP4	NR1H3	NR1H3	NR1H3;MYBPC3;ACP2	NR1H3;ACP2	NR1H3	NR1H3	NR1H3;ACP2	na	NR1H3	na	ACP2	na	AC090589.1;AGBL2;C11orf49;DDB2;LRP4;MYBPC3
rs1631174	LDL	11	47974373	C	A	0.642464	-0.0099	0.0014	11.8143	8.5947	0.8684	na	PTPRJ	PTPRJ	AGBL2;PTPRJ	PTPRJ	CELF1	PTPRJ	AGBL2;PTPRJ;SPI1	KBTBD4	na	na	AGBL2;PTPRJ	na	na	PTPRJ	na	AGBL2	CELF1;KBTBD4;SPI1
rs34895872	TC	11	48021778	G	A	0.285395	0.0175	0.0014	35.127	29.093	0.3001	na	PTPRJ	PTPRJ	CELF1;NDUFS3;PTPMT1;KBTBD4;FAM180B;C1QTNF4;MTCH2;AGBL2;NUP160;PTPRJ	CELF1;NDUFS3;FAM180B;C1QTNF4;MTCH2;AGBL2;NUP160;PTPRJ	CELF1	PTPRJ	PTPRJ;FNBP4	na	na	CELF1	PTPRJ	na	na	PTPRJ	na	CELF1	AGBL2;C1QTNF4;FAM180B;FNBP4;KBTBD4;MTCH2;NDUFS3;NUP160;PTPMT1
rs4619163	logTG	11	56119093	C	T	0.0583418	-0.0204	0.003	10.9804	8.47897	0.1635	na	na	na	na	na	na	OR8K1	OR4A21P	OR8U1;TRIM51;RP11-738O11.9	na	na	na	na	na	na	na	na	OR4A21P;OR8K1;OR8U1;RP11-738O11.9;TRIM51
rs75230704	TC	11	56225592	G	A	0.958786	-0.0288	0.0036	14.9051	10.6488	0.9554	na	na	na	na	na	na	OR5M9	na	OR8I2	na	na	na	na	na	na	na	na	OR5M9;OR8I2
rs17640714	HDL	11	56652022	G	A	0.935031	-0.024	0.0027	18.2096	15.547	0.03196	na	na	na	na	na	TNKS1BP1	OR5AK2	TNKS1BP1;SSRP1	na	na	na	na	na	na	na	na	TNKS1BP1	OR5AK2;SSRP1
rs10792091	logTG	11	57119156	C	T	0.118072	0.0132	0.002	10.386	7.49977	0.9298	na	P2RX3;RTN4RL2	P2RX3	LRRC55;TNKS1BP1;SSRP1;P2RX3;PRG2;RTN4RL2;MED19	LRRC55;SSRP1;P2RX3	TNKS1BP1	P2RX3	TNKS1BP1;SSRP1	RP11-872D17.4;TNKS1BP1;SSRP1;snoU13	na	TNKS1BP1	TNKS1BP1;SSRP1	na	na	TNKS1BP1	P2RX3;SSRP1	RTN4RL2	LRRC55;MED19;PRG2;RP11-872D17.4;snoU13
rs12575459	HDL	11	58162382	G	A	0.928222	-0.0182	0.0024	13.4726	9.96663	0.4157	na	na	na	na	na	ZFP91	OR5B3	ZFP91;LPXN	na	ZFP91;ZFP91	na	na	na	na	na	na	ZFP91	LPXN;OR5B3
rs950802	TC	11	60152584	G	A	0.66849	0.0097	0.0013	13.0679	9.96269	0.4381	na	MS4A7;MS4A14	MS4A7;MS4A14	MS4A7;MS4A14	MS4A7;MS4A14	MS4A7	MS4A6E	na	MS4A7;MS4A14;MS4A6E	PTGDR2	MS4A7	na	na	na	MS4A7	MS4A14	MS4A6E	na
rs174564	HDL	11	61588305	G	A	0.341685	-0.0433	0.0013	242.525	215.289	5.74e-06	na	TMEM132A;FEN1;FADS1;TMEM258;BEST1;B3GAT3	FADS1	DAGLA;DKFZP434K028;MYRF;TMEM258;FEN1;FADS2;FADS1;FADS3;RAB3IL1;BEST1;FTH1	DAGLA;DKFZP434K028;MYRF;TMEM258;FEN1;FADS2;FADS1;FADS3;RAB3IL1;BEST1	CPSF7	FADS2	FADS2;FADS1	na	DAGLA;FADS1;FADS2;FADS3	na	FADS2;FADS1	na	na	na	FADS1;FADS2	BEST1;FEN1;TMEM258	B3GAT3;CPSF7;DAGLA;DKFZP434K028;FADS3;FTH1;MYRF;RAB3IL1;TMEM132A
rs174564	LDL	11	61588305	G	A	0.339725	-0.0423	0.0014	199.813	199.745	0.0168	na	FADS1;TMEM258;FEN1;TMEM132A;BEST1;B3GAT3	FADS1	DAGLA;DKFZP434K028;MYRF;TMEM258;FEN1;FADS2;FADS1;FADS3;RAB3IL1;BEST1;FTH1	DAGLA;DKFZP434K028;MYRF;TMEM258;FEN1;FADS2;FADS1;FADS3;RAB3IL1;BEST1	FADS1	FADS2	FADS2;FADS1	na	DAGLA;FADS1;FADS2;FADS3	FADS1	FADS2;FADS1	na	na	FADS1	FADS2	BEST1;FEN1;TMEM258	B3GAT3;DAGLA;DKFZP434K028;FADS3;FTH1;MYRF;RAB3IL1;TMEM132A
rs174564	logTG	11	61588305	G	A	0.34052	0.0513	0.0013	339.839	295.774	0.1634	na	FADS1;TMEM258;BEST1;FEN1;FADS3;B3GAT3;TMEM132A	FADS3;FADS1	DAGLA;DKFZP434K028;MYRF;TMEM258;FEN1;FADS2;FADS1;FADS3;BEST1;FTH1	DAGLA;DKFZP434K028;MYRF;TMEM258;FEN1;FADS2;FADS1;FADS3;BEST1	DDB1	FADS2	FADS2;FADS1	na	DAGLA;FADS1;FADS2;FADS3	na	FADS2;FADS1	na	na	na	FADS1;FADS2	BEST1;FADS3;FEN1;TMEM258	B3GAT3;DAGLA;DDB1;DKFZP434K028;FTH1;MYRF;TMEM132A
rs174564	nonHDL	11	61588305	G	A	0.351023	-0.0335	0.0016	96.6127	90.4329	0.08446	na	TMEM132A;B3GAT3;FADS1;TMEM258;BEST1;FEN1;FADS3	FADS1	DAGLA;DKFZP434K028;MYRF;TMEM258;FEN1;FADS2;FADS1;FADS3;BEST1;FTH1	DAGLA;MYRF;TMEM258;FEN1;FADS2;FADS1;FADS3	FADS3	FADS2	FADS2;FADS1;C11orf9	na	DAGLA;FADS1;FADS2;FADS3	FADS3	FADS2;FADS1	na	na	na	FADS1;FADS2;FADS3	BEST1;FEN1;TMEM258	B3GAT3;C11orf9;DAGLA;DKFZP434K028;FTH1;MYRF;TMEM132A
rs174564	TC	11	61588305	G	A	0.342186	-0.0406	0.0013	213.39	199.521	0.01118	na	FADS1;B3GAT3;BEST1;TMEM258;TMEM132A;FEN1	FADS1	DAGLA;DKFZP434K028;MYRF;TMEM258;FEN1;FADS2;FADS1;FADS3;RAB3IL1;BEST1;FTH1	DAGLA;DKFZP434K028;MYRF;TMEM258;FEN1;FADS2;FADS1;FADS3;RAB3IL1;BEST1	DDB1	FADS2	FADS2;FADS1	na	DAGLA;FADS1;FADS2;FADS3	na	FADS2;FADS1	na	na	na	FADS1;FADS2	BEST1;FEN1;TMEM258	B3GAT3;DAGLA;DDB1;DKFZP434K028;FADS3;FTH1;MYRF;RAB3IL1;TMEM132A
rs11231161	logTG	11	62378221	G	A	0.327556	0.0108	0.0014	13.9148	11.4243	0.5265	na	EML3;AHNAK;EEF1G;MTA2;ROM1;UQCC3	EML3;EEF1G	AHNAK;EEF1G;TUT1;MTA2;EML3;ROM1;B3GAT3;GANAB;INTS5;C11orf98;LBHD1;UQCC3;UBXN1	AHNAK;EEF1G;MTA2;EML3;ROM1;GANAB;INTS5;C11orf98	STX5	EML3	AHNAK;MTA2;GANAB;EML3;INTS5;TUT1	MTA2;RP11-831H9.3;EML3;B3GAT3;ROM1	BSCL2;SLC22A8	na	AHNAK;MTA2;GANAB;EML3;INTS5;TUT1	na	EML3	MTA2	AHNAK;ROM1	B3GAT3;EEF1G;GANAB;INTS5;TUT1;UQCC3	C11orf98;LBHD1;RP11-831H9.3;STX5;UBXN1
rs10751001	LDL	11	63615561	C	T	0.632312	-0.0113	0.0013	17.4496	12.183	0.8974	na	COX8A;NAA40	na	ATL3;C11orf84;MARK2;RCOR2;NAA40;COX8A;OTUB1	MARK2;NAA40;COX8A;OTUB1	MARK2	MARK2	MACROD1;MARK2	RNU6-1306P;MARK2;RCOR2	ESRRA;MARK2	MARK2	MARK2	na	MARK2	na	na	COX8A;NAA40;RCOR2	ATL3;C11orf84;MACROD1;OTUB1;RNU6-1306P
rs10897459	TC	11	63659778	C	T	0.348799	0.0105	0.0013	15.1777	11.0339	0.8648	na	COX8A;MARK2;NAA40	MARK2	ATL3;C11orf84;MARK2;RCOR2;NAA40;COX8A;OTUB1	ATL3;MARK2;NAA40;COX8A	MARK2	MARK2	MARK2;MACROD1	na	ESRRA;MARK2	MARK2	MARK2	na	MARK2	na	na	COX8A;NAA40	ATL3;C11orf84;MACROD1;OTUB1;RCOR2
rs11605500	nonHDL	11	63669411	G	A	0.419247	0.011	0.0015	12.6488	8.92254	0.6219	na	VEGFB;HRASLS2	na	C11orf84;MARK2;RCOR2;NAA40;COX8A;OTUB1;VEGFB	NAA40;COX8A;OTUB1;VEGFB	MARK2	MARK2	MARK2;MACROD1;OTUB1	RCOR2;MARK2;PLCB3;RNU6-1306P	ESRRA;MARK2	MARK2	MARK2;OTUB1	na	MARK2	na	na	OTUB1;RCOR2;VEGFB	C11orf84;COX8A;HRASLS2;MACROD1;NAA40;PLCB3;RNU6-1306P
rs56271783	HDL	11	64004723	G	C	0.957141	0.0501	0.0032	54.5212	47.3963	0.7423	na	VEGFB	VEGFB	C11orf84;MARK2;RCOR2;NAA40;COX8A;OTUB1	MARK2;NAA40;COX8A;OTUB1	MARK2	VEGFB	PLCB3;FERMT3;MACROD1;VEGFB;STIP1;PRDX5	VEGFB	ESRRA;MARK2;NRXN2	MARK2	VEGFB	na	na	VEGFB	na	MARK2	C11orf84;COX8A;FERMT3;MACROD1;NAA40;OTUB1;PLCB3;PRDX5;RCOR2;STIP1
rs56271783	logTG	11	64004723	G	C	0.956983	-0.0536	0.0032	62.247	56.7926	0.2567	na	VEGFB	VEGFB	FLRT1;DNAJC4;VEGFB;PPP1R14B;PLCB3;BAD;GPR137;TEX40;ESRRA;TRMT112;PRDX5;CCDC88B;RPS6KA4	FLRT1;VEGFB;PRDX5;RPS6KA4	BAD	VEGFB	FERMT3;PLCB3;VEGFB;MACROD1;STIP1;ESRRA	DNAJC4;NUDT22	ESRRA;MARK2;NRXN2	BAD	PLCB3;VEGFB;ESRRA	na	na	VEGFB	na	BAD;DNAJC4;ESRRA;PLCB3	CCDC88B;FERMT3;FLRT1;GPR137;MACROD1;NUDT22;PPP1R14B;PRDX5;RPS6KA4;STIP1;TEX40;TRMT112
rs117073213	TC	11	64162955	G	A	0.965102	0.0226	0.0035	9.97184	7.58649	0.5708	na	MARK2	MARK2	MARK2;RCOR2;NAA40;COX8A;OTUB1	MARK2;NAA40;COX8A	MARK2	RPS6KA4	PLCB3;CCDC88B;PRDX5	na	ESRRA;MARK2;NRXN2	MARK2	na	na	na	na	MARK2	na	CCDC88B;COX8A;NAA40;OTUB1;PLCB3;PRDX5;RCOR2;RPS6KA4
rs10896018	TC	11	65351074	G	A	0.707693	-0.0108	0.0013	16.0106	11.2867	0.3718	na	EHBP1L1;KRT8P26;AP001462.1	AP001462.1	CAPN1;SSSCA1;FAM89B;EHBP1L1;KCNK7;MAP3K11;PCNXL3;SIPA1;RELA;KAT5;RNASEH2C;RP11-770G2.2;AP5B1;OVOL1	EHBP1L1;KCNK7;MAP3K11;PCNXL3;SIPA1	RELA	EHBP1L1	EHBP1L1	AP001362.1;KCNK7;EHBP1L1;EIF1AD	VPS51	RELA	EHBP1L1	na	EHBP1L1	na	na	KCNK7;RELA	AP001362.1;AP001462.1;AP5B1;CAPN1;EIF1AD;FAM89B;KAT5;KRT8P26;MAP3K11;OVOL1;PCNXL3;RNASEH2C;RP11-770G2.2;SIPA1;SSSCA1
rs2306363	HDL	11	65405600	G	T	0.804967	-0.0196	0.0016	33.7747	28.3982	0.4645	na	SIPA1	SIPA1	SSSCA1;FAM89B;EHBP1L1;KCNK7;MAP3K11;PCNXL3;SIPA1;RELA;KAT5;RNASEH2C;RP11-770G2.2;AP5B1;OVOL1;EFEMP2;BANF1	KCNK7;MAP3K11;PCNXL3;SIPA1	RELA	SIPA1	PCNXL3;RELA;MAP3K11;KAT5;SIPA1	na	na	RELA	PCNXL3;RELA;MAP3K11;KAT5;SIPA1	na	na	SIPA1	RELA	KAT5;MAP3K11;PCNXL3	AP5B1;BANF1;EFEMP2;EHBP1L1;FAM89B;KCNK7;OVOL1;RNASEH2C;RP11-770G2.2;SSSCA1
rs10750766	logTG	11	65473798	C	A	0.342619	-0.0146	0.0013	28.5407	23.7133	0.003699	na	SIPA1;RNASEH2C	SIPA1	SSSCA1;EHBP1L1;KCNK7;MAP3K11;PCNXL3;SIPA1;RELA;KAT5;RNASEH2C;RP11-770G2.2;AP5B1;OVOL1;FIBP;BANF1;CATSPER1;GAL3ST3;PACS1	KCNK7;MAP3K11;PCNXL3;SIPA1;RELA;RNASEH2C;PACS1	RELA	KAT5	PCNXL3;RELA;MAP3K11;KAT5;SIPA1	na	na	RELA	PCNXL3;RELA;MAP3K11;KAT5;SIPA1	na	na	na	KAT5;RELA;SIPA1	MAP3K11;PCNXL3;RNASEH2C	AP5B1;BANF1;CATSPER1;EHBP1L1;FIBP;GAL3ST3;KCNK7;OVOL1;PACS1;RP11-770G2.2;SSSCA1
rs7119612	LDL	11	65570517	C	T	0.88478	-0.0143	0.002	12.0616	9.66988	0.4212	na	OVOL1-AS1;SIPA1;KRT8P26	SIPA1	SSSCA1;FAM89B;EHBP1L1;KCNK7;MAP3K11;PCNXL3;SIPA1;RELA;KAT5;RNASEH2C;RP11-770G2.2;AP5B1;OVOL1;EFEMP2;BANF1	KCNK7;MAP3K11;PCNXL3;SIPA1	RELA	OVOL1	C11orf68;DRAP1;SF3B2;SART1;KAT5;RELA	PCNXL3;SIPA1;AP001362.1;KCNK7;EHBP1L1;FOSL1	na	RELA	KAT5;RELA	na	na	na	RELA;SIPA1	EHBP1L1;KAT5;KCNK7;OVOL1;PCNXL3	AP001362.1;AP5B1;BANF1;C11orf68;DRAP1;EFEMP2;FAM89B;FOSL1;KRT8P26;MAP3K11;OVOL1-AS1;RNASEH2C;RP11-770G2.2;SART1;SF3B2;SSSCA1
rs4930352	HDL	11	66066993	G	T	0.538835	-0.0094	0.0013	12.3185	9.95636	0.09069	na	SIPA1;OVOL1-AS1;KRT8P26;AP001266.2;AP000769.1;OVOL1;PCNX3	SIPA1;PCNX3	EFEMP2;BANF1;NPAS4;MRPL11;PELI3;DPP3;BBS1;ZDHHC24;ACTN3;CTD-3074O7.2;CTSF;CCS;SPTBN2	NPAS4;PELI3;DPP3;BBS1;CTSF;CCS;SPTBN2	CCDC85B	TMEM151A	na	na	na	na	na	na	na	na	na	na	ACTN3;AP000769.1;AP001266.2;BANF1;BBS1;CCDC85B;CCS;CTD-3074O7.2;CTSF;DPP3;EFEMP2;KRT8P26;MRPL11;NPAS4;OVOL1;OVOL1-AS1;PCNX3;PELI3;SIPA1;SPTBN2;TMEM151A;ZDHHC24
rs10501397	TC	11	66272976	C	A	0.760347	0.0125	0.0014	18.365	14.8344	0.03541	na	DPP3;AP002748.3;PELI3;BBS1;ZDHHC24;CTSF	BBS1;PELI3;DPP3	NPAS4;MRPL11;PELI3;DPP3;BBS1;ZDHHC24;ACTN3;CTD-3074O7.2;CTSF;CCDC87;CCS;RBM4B;SPTBN2	NPAS4;PELI3;DPP3;BBS1;CTSF;CCS;SPTBN2	CCS	DPP3	RBM14;CCS;DPP3	DPP3;CTD-3074O7.11;BBS1;ZDHHC24;PELI3;CTD-3074O7.5	na	CCS	CCS;DPP3	na	DPP3	na	BBS1;CCS;PELI3;ZDHHC24	CTSF	ACTN3;AP002748.3;CCDC87;CTD-3074O7.11;CTD-3074O7.2;CTD-3074O7.5;MRPL11;NPAS4;RBM14;RBM4B;SPTBN2
rs11822028	nonHDL	11	66288123	C	T	0.246413	-0.0137	0.0017	15.1133	11.0355	0.6022	na	DPP3;BBS1;ZDHHC24;PCNX3;CTSF;PELI3;AP002748.3	BBS1;DPP3;PELI3	NPAS4;MRPL11;PELI3;DPP3;BBS1;ZDHHC24;ACTN3;CTSF;CCS	NPAS4;PELI3;DPP3;BBS1	PC	CTD-3074O7.11	RBM14;CCS;DPP3;RBM4	DPP3;CTD-3074O7.11;BBS1;ZDHHC24;PELI3;CTD-3074O7.5;ACTN3	na	na	CCS;DPP3	na	na	DPP3	BBS1;PELI3;ZDHHC24	ACTN3;CCS;CTD-3074O7.11;CTSF	AP002748.3;CTD-3074O7.5;MRPL11;NPAS4;PC;PCNX3;RBM14;RBM4
rs57596493	LDL	11	66302743	C	T	0.765381	0.0138	0.0015	19.4462	17.4464	0.02064	na	PELI3;ZDHHC24;DPP3;BBS1;CTSF;AP002748.3	PELI3;BBS1	NPAS4;MRPL11;PELI3;DPP3;BBS1;ZDHHC24;ACTN3;CTD-3074O7.2;CTSF;CCS;SPTBN2	NPAS4;PELI3;DPP3;BBS1;CTSF;CCS;SPTBN2	CCS	ZDHHC24	CCS;CTSF;RBM14	BBS1;ZDHHC24;CTD-3074O7.11;DPP3;PELI3;CTD-3074O7.5;ACTN3;RIN1	na	CCS	CCS;CTSF	na	na	ZDHHC24	BBS1;CCS;CTSF;DPP3;PELI3	ACTN3	AP002748.3;CTD-3074O7.11;CTD-3074O7.2;CTD-3074O7.5;MRPL11;NPAS4;RBM14;RIN1;SPTBN2
rs12794995	HDL	11	67372946	G	A	0.771545	-0.0113	0.0015	13.3057	10.2418	0.05165	na	DOC2GP;TBX10;NDUFV1;GSTP1;PC	TBX10;NDUFV1	ADRBK1;ANKRD13D;SSH3;RAD9A;POLD4;TBC1D10C;CARNS1;RPS6KB2;PITPNM1	ADRBK1;SSH3;POLD4;TBC1D10C;CARNS1	CHKA	C11orf72	CDK2AP2	NUDT8;TBX10	CHKA;PITPNM1	na	na	na	na	na	na	TBX10	ADRBK1;ANKRD13D;C11orf72;CARNS1;CDK2AP2;CHKA;DOC2GP;GSTP1;NDUFV1;NUDT8;PC;PITPNM1;POLD4;RAD9A;RPS6KB2;SSH3;TBC1D10C
rs11605837	HDL	11	68597886	G	T	0.678123	0.0132	0.0013	23.4968	17.5024	0.2312	na	IGHMBP2	na	na	na	LRP5	CPT1A	CPT1A;IGHMBP2	CPT1A	CPT1A;LRP5;TPCN2	na	IGHMBP2;CPT1A	na	na	na	CPT1A	IGHMBP2	LRP5
rs4365062	logTG	11	68613864	C	T	0.526589	0.0138	0.0013	25.5973	20.5967	0.9057	na	TPCN2;IGHMBP2;AP000808.1;MRGPRF;CHKA	na	CPT1A;RP11-757G1.6;MRPL21;IGHMBP2;MRGPRD;MRGPRF;TPCN2	CPT1A;RP11-757G1.6;MRPL21;IGHMBP2;MRGPRD;MRGPRF	LRP5	CPT1A	CPT1A;IGHMBP2	na	CPT1A;LRP5;TPCN2	na	CPT1A;IGHMBP2	na	na	na	CPT1A;IGHMBP2	MRGPRF;TPCN2	AP000808.1;CHKA;LRP5;MRGPRD;MRPL21;RP11-757G1.6
rs10796821	logTG	11	69305417	G	A	0.47045	0.009	0.0013	11.3546	8.06519	0.6315	na	TESMIN;IGHMBP2;AP003071.4;MRGPRF;AP000808.1	IGHMBP2	TPCN2;AP000439.5	na	CCND1	MYEOV	CCND1	na	TPCN2	na	na	na	na	na	na	CCND1	AP000439.5;AP000808.1;AP003071.4;IGHMBP2;MRGPRF;MYEOV;TESMIN;TPCN2
rs600626	HDL	11	75455309	G	A	0.189409	-0.0288	0.0016	71.7104	63.3445	0.7522	na	UVRAG-DT	na	na	na	ARRB1	MOGAT2	DGAT2;UVRAG	na	DGAT2;MOGAT2	na	na	na	na	na	na	na	ARRB1;DGAT2;MOGAT2;UVRAG;UVRAG-DT
rs72997616	TC	11	75474195	C	A	0.882763	0.0237	0.0019	34.9833	28.8937	0.986	na	na	na	DGAT2;UVRAG	DGAT2;UVRAG	ARRB1	DGAT2	DGAT2;UVRAG	na	DGAT2;MOGAT2	na	DGAT2;UVRAG	na	na	na	DGAT2	UVRAG	ARRB1
rs61894507	HDL	11	76156973	G	A	0.704831	-0.0093	0.0014	10.5119	7.86134	0.2039	na	na	na	na	na	UVRAG	C11orf30	C11orf30	na	ACER3	na	C11orf30	na	na	na	na	C11orf30	UVRAG
rs11237204	HDL	11	77198233	C	T	0.219595	-0.0109	0.0015	12.4336	7.64513	0.9017	na	na	na	na	na	RSF1	DKFZP434E1119	na	GDPD4	ACER3;PAK1	na	na	na	na	na	na	na	DKFZP434E1119;GDPD4;RSF1
rs10899485	logTG	11	78072383	C	T	0.20484	-0.012	0.0016	13.1951	13.3458	0.0002556	na	GAB2	GAB2	KCTD14;THRSP;NDUFC2;USP35;GAB2;RP11-452H21.4;NARS2	KCTD14;THRSP;USP35;GAB2;RP11-452H21.4;NARS2	GAB2	GAB2	USP35	na	ALG8;THRSP	GAB2	USP35	na	na	GAB2	na	USP35	KCTD14;NARS2;NDUFC2;RP11-452H21.4;THRSP
rs11237469	TC	11	78072875	T	A	0.182966	-0.0119	0.0016	12.9888	13.1784	0.001617	na	na	na	USP35;GAB2;RP11-452H21.4;NARS2	GAB2;RP11-452H21.4;NARS2	GAB2	GAB2	USP35;GAB2	na	ALG8;THRSP	GAB2	USP35;GAB2	na	na	GAB2	na	USP35	NARS2;RP11-452H21.4
rs7933222	TC	11	95298828	T	A	0.808395	0.0102	0.0015	10.9804	9.54151	0.02842	na	na	na	na	na	na	FAM76B	na	na	na	na	na	na	na	na	na	na	FAM76B
rs12575636	HDL	11	95311260	G	T	0.17723	-0.0121	0.0016	13.403	9.03099	0.8091	na	na	na	na	na	na	FAM76B	na	CEP57	na	na	na	na	na	na	na	na	CEP57;FAM76B
rs145567604	nonHDL	11	103870621	ATCTTG	A	0.817283	0.0131	0.002	10.2401	7.6971	0.2904	na	na	na	na	na	na	PDGFD	na	na	na	na	na	na	na	na	na	na	PDGFD
rs11226108	LDL	11	103870755	G	C	0.816391	0.0147	0.0017	17.277	13.6048	0.9007	na	na	na	DDI1	na	na	PDGFD	na	na	na	na	na	na	na	na	na	na	DDI1;PDGFD
rs11226108	TC	11	103870755	G	C	0.817858	0.0144	0.0016	18.6464	14.6066	0.5744	na	na	na	DDI1	na	na	PDGFD	na	na	na	na	na	na	na	na	na	na	DDI1;PDGFD
rs72988923	HDL	11	103873662	C	A	0.154371	-0.0118	0.0017	11.4102	8.57132	0.06684	na	na	na	DDI1	na	na	PDGFD	PDGFD	na	na	na	PDGFD	na	na	na	na	PDGFD	DDI1
rs10891052	TC	11	109957826	G	A	0.51717	0.0069	0.0012	8.04942	8.12162	0.0001844	na	na	na	na	na	na	ZC3H12C	ZC3H12C	na	na	na	ZC3H12C	na	na	na	na	ZC3H12C	na
rs10891054	HDL	11	109966513	C	A	0.710718	-0.0163	0.0014	30.6029	25.2703	0.5786	na	ZC3H12C	ZC3H12C	na	na	RDX	ZC3H12C	na	na	na	na	na	na	na	na	na	ZC3H12C	RDX
rs112125399	logTG	11	111623694	AAAAC	A	0.66964	-0.0102	0.0014	12.4949	8.6684	0.2408	na	PIH1D2;PPP2R1B;FDXACB1;HSPB2;CRYAB	PPP2R1B;HSPB2;CRYAB	PPP2R1B;RP11-108O10.2;ALG9;FDXACB1;CRYAB;HSPB2;C11orf52;DLAT;PIH1D2;C11orf57	PPP2R1B;RP11-108O10.2;CRYAB;HSPB2;DLAT;PIH1D2;C11orf57	SIK2	PPP2R1B	na	na	BCO2;DIXDC1;SIK2	na	na	na	na	na	PPP2R1B	CRYAB;FDXACB1;HSPB2;PIH1D2	ALG9;C11orf52;C11orf57;DLAT;RP11-108O10.2;SIK2
rs603646	HDL	11	111861156	C	T	0.579329	-0.0087	0.0013	10.6582	7.52067	0.319	na	PPIHP1;DLAT;AP001781.1;ALG9;C11orf1;NKAPD1;PIH1D2;HSPB2;DIXDC1	PPIHP1	na	na	SIK2	DIXDC1	na	RP11-708L7.9;DLAT;RNU6-893P	BCO2;DIXDC1;SIK2	na	na	na	na	na	na	DIXDC1;DLAT	ALG9;AP001781.1;C11orf1;HSPB2;NKAPD1;PIH1D2;PPIHP1;RNU6-893P;RP11-708L7.9;SIK2
rs10891588	logTG	11	113579598	C	T	0.909762	-0.0065	0.0023	2.32679	8.27876	2.21e-10	na	na	na	ANKK1;DRD2	ANKK1	ZBTB16	TMPRSS5	USP28	na	na	na	na	na	na	na	na	na	ANKK1;DRD2;TMPRSS5;USP28;ZBTB16
rs10891789	logTG	11	114850006	C	T	0.605722	-0.0032	0.0013	1.85904	10.8064	2.89e-12	na	na	na	na	na	CADM1	CADM1	na	na	na	CADM1	na	na	na	na	na	CADM1	na
rs776902938	HDL	11	116014665	C	T	0.999321	-0.2505	0.05	6.26416	7.50206	1	na	na	na	na	na	na	na	na	na	na	na	na	na	na	na	na	na	na
rs117288140	logTG	11	116139965	C	T	0.98288	-0.0385	0.0055	11.5918	9.43872	0.08846	na	na	na	AP001891.1;AP000770.1;BUD13	BUD13	na	BUD13	APOA5	BUD13	na	na	na	na	na	na	BUD13	na	AP000770.1;AP001891.1;APOA5
rs964184	HDL	11	116648917	G	C	0.153399	-0.0975	0.0017	716.132	700.539	5.97e-59	APOA5	ZNF259	na	BUD13;ZNF259;APOA5;APOA4;APOC3;APOA1;SIK3;PAFAH1B2;SIDT2;TAGLN;PCSK7	BUD13;ZNF259;APOA5;SIK3	APOA1	ZNF259	APOA5;BUD13	APOC3;APOA1	APOA1;APOA4;APOA5;APOC3;SIDT2;SIK3	APOA1	APOA5;BUD13	na	na	na	APOA1;ZNF259	APOA5;APOC3;BUD13	APOA4;PAFAH1B2;PCSK7;SIDT2;SIK3;TAGLN
rs964184	LDL	11	116648917	G	C	0.149633	0.0405	0.0017	124.72	154.705	7.56e-45	APOA5	ZNF259	ZNF259	BUD13;ZNF259;APOA5;APOA4;APOC3;APOA1;SIK3;PAFAH1B2;SIDT2;TAGLN;PCSK7	BUD13;ZNF259;APOA5;SIK3	APOA1	ZNF259	APOA5	APOC3	APOA1;APOA4;APOA5;APOC3;SIDT2;SIK3	APOA1	APOA5	na	na	na	ZNF259	APOA1;APOA5;APOC3	APOA4;BUD13;PAFAH1B2;PCSK7;SIDT2;SIK3;TAGLN
rs964184	logTG	11	116648917	G	C	0.150596	0.225	0.0017	3806.05	3750.87	4.44659e-293	APOA5	na	na	AP001891.1;AP000770.1;BUD13;ZNF259;APOA5;APOA4;APOC3;APOA1;SIK3;PAFAH1B2;SIDT2;TAGLN;PCSK7;RNF214	BUD13;ZNF259;APOA5;APOA1;SIK3;PAFAH1B2;SIDT2;TAGLN;PCSK7;RNF214	APOA1	ZNF259	APOA5	BUD13;APOC3;APOA1	APOA1;APOA4;APOA5;APOC3;SIDT2;SIK3	APOA1	APOA5	na	na	na	APOA1	APOA5;APOC3;BUD13;ZNF259	AP000770.1;AP001891.1;APOA4;PAFAH1B2;PCSK7;RNF214;SIDT2;SIK3;TAGLN
rs964184	nonHDL	11	116648917	G	C	0.150274	0.1244	0.002	842	801.118	7.53e-42	APOA5	ZNF259	ZNF259	BUD13;ZNF259;APOA5;APOA4;APOC3;APOA1;SIK3;PAFAH1B2;SIDT2;TAGLN;PCSK7;RNF214	BUD13;ZNF259;APOA5;APOA1;SIK3;PAFAH1B2;SIDT2;TAGLN	APOA1	ZNF259	APOA5;ZNF259	APOC3	APOA1;APOA4;APOA5;APOC3;SIDT2;SIK3	APOA1	APOA5;ZNF259	na	na	ZNF259	na	APOA1;APOA5;APOC3	APOA4;BUD13;PAFAH1B2;PCSK7;RNF214;SIDT2;SIK3;TAGLN
rs964184	TC	11	116648917	G	C	0.154589	0.0844	0.0016	606.046	599.712	3.94e-71	APOA5	na	na	AP000770.1;BUD13;ZNF259;APOA5;APOA4;APOC3;APOA1;SIK3;PAFAH1B2;SIDT2;TAGLN;PCSK7;RNF214	BUD13;ZNF259;APOA5;SIK3;PAFAH1B2;SIDT2;RNF214	APOA1	ZNF259	APOA5;BUD13	APOC3;APOA1	APOA1;APOA4;APOA5;APOC3;SIDT2;SIK3	APOA1	APOA5;BUD13	na	na	na	APOA1	APOA5;APOC3;BUD13;ZNF259	AP000770.1;APOA4;PAFAH1B2;PCSK7;RNF214;SIDT2;SIK3;TAGLN
rs192489212	HDL	11	117220429	C	A	0.00175264	0.6597	0.0195	250.157	243.685	0.4645	na	na	na	SIK3;PAFAH1B2;SIDT2;TAGLN;PCSK7;BACE1	SIK3	SIDT2	CEP164	na	CEP164	SIDT2;SIK3	SIDT2	na	na	na	na	na	CEP164;SIDT2	BACE1;PAFAH1B2;PCSK7;SIK3;TAGLN
rs192489212	LDL	11	117220429	C	A	0.00176876	-0.1454	0.0196	12.926	13.1395	0.6772	na	SIDT2;PAFAH1B2	na	SIK3;PAFAH1B2;SIDT2;TAGLN;PCSK7;BACE1	SIK3	PCSK7	CEP164	na	na	SIDT2;SIK3	PCSK7	na	na	na	na	na	PAFAH1B2;PCSK7;SIDT2	BACE1;CEP164;SIK3;TAGLN
rs192489212	logTG	11	117220429	C	A	0.00176725	-0.8949	0.0194	463.824	474.304	0.6333	na	na	na	SIK3;PAFAH1B2;SIDT2;TAGLN;PCSK7;RNF214;BACE1;CEP164	SIK3;PAFAH1B2;SIDT2;TAGLN;PCSK7;RNF214;BACE1;CEP164	SIDT2	CEP164	na	na	SIDT2;SIK3	SIDT2	na	na	na	na	na	CEP164;SIDT2	BACE1;PAFAH1B2;PCSK7;RNF214;SIK3;TAGLN
rs747437837	logTG	11	117849058	G	C	0.000538793	-0.4135	0.0512	15.175	26.1391	1	na	na	na	SCN4B	na	KMT2A	IL10RA	na	na	na	na	na	na	na	na	na	na	IL10RA;KMT2A;SCN4B
rs758391044	HDL	11	118122491	C	T	0.00181972	0.1488	0.0264	7.76025	14.1546	1	na	RPL5P30;IFT46;TMEM25;ARCN1	IFT46	TMEM25;IFT46;ARCN1;PHLDB1;TREH;DDX6	TMEM25;IFT46;ARCN1;PHLDB1;TREH;DDX6	KMT2A	MPZL3	na	na	na	na	na	na	na	na	na	ARCN1;IFT46;TMEM25	DDX6;KMT2A;MPZL3;PHLDB1;RPL5P30;TREH
rs17122278	LDL	11	118449370	G	A	0.14624	0.0187	0.0018	24.5551	19.0381	0.08856	na	RPL5P30;ARCN1;IFT46	na	TMEM25;IFT46;ARCN1;PHLDB1;TREH;DDX6	TMEM25;IFT46;ARCN1;PHLDB1;TREH;DDX6	KMT2A	ARCN1	ARCN1	TTC36;TMEM25;RP11-770J1.3;PHLDB1;ARCN1	MPZL3;SLC37A4	na	ARCN1	na	ARCN1	na	na	IFT46;PHLDB1;TMEM25	DDX6;KMT2A;RP11-770J1.3;RPL5P30;TREH;TTC36
rs73023350	TC	11	118449396	G	A	0.829811	-0.0181	0.0016	28.9439	22.7619	0.008041	na	IFT46;TMEM25;RPL5P30;ARCN1	IFT46	SCN4B;TMEM25;IFT46;ARCN1;PHLDB1;TREH;DDX6	TMEM25;IFT46;ARCN1;PHLDB1;TREH;DDX6	KMT2A	ARCN1	KMT2A;ARCN1	TTC36;TMEM25;RP11-770J1.3;IFT46;RPL5P30	MPZL3;SLC37A4	na	ARCN1	na	na	ARCN1	IFT46;TMEM25	KMT2A;RPL5P30	DDX6;PHLDB1;RP11-770J1.3;SCN4B;TREH;TTC36
rs11216909	nonHDL	11	118449746	C	T	0.824374	-0.016	0.002	14.9051	13.3489	0.001806	na	IFT46;ARCN1;RPL5P30;TMEM25	IFT46	SCN4B;TMEM25;IFT46;ARCN1;PHLDB1;TREH;DDX6	TMEM25;IFT46;ARCN1;PHLDB1	KMT2A	ARCN1	ARCN1;KMT2A	TTC36;TMEM25;RP11-770J1.3;PHLDB1;ARCN1	MPZL3;SLC37A4	na	ARCN1	na	ARCN1	na	TMEM25	IFT46;KMT2A;PHLDB1	DDX6;RP11-770J1.3;RPL5P30;SCN4B;TREH;TTC36
rs11217133	HDL	11	118928249	G	A	0.649511	0.0156	0.0013	32.4494	25.1066	0.9742	na	HMBS;VPS11;AP003392.5;AP003392.6;SLC37A4	AP003392.6;HMBS	IFT46;ARCN1;PHLDB1;TREH;DDX6	IFT46;ARCN1;PHLDB1;TREH;DDX6	H2AFX	HYOU1	HYOU1	HMBS;VPS11	ABCG4;C1QTNF5;CBL;SLC37A4	na	HYOU1	na	na	na	na	HMBS;HYOU1;VPS11	AP003392.5;AP003392.6;ARCN1;DDX6;H2AFX;IFT46;PHLDB1;SLC37A4;TREH
rs510435	TC	11	118980039	C	T	0.641023	0.008	0.0013	9.12133	8.92702	0.02466	na	PHLDB1;IFT46;TREH;TMEM25;RPL5P30	PHLDB1;IFT46;TREH	PHLDB1;TREH;DDX6;H2AFX;DPAGT1;C2CD2L;HINFP;ABCG4;NLRX1;PDZD3	PHLDB1;TREH;DDX6;H2AFX;DPAGT1;HINFP;ABCG4;PDZD3	H2AFX	C2CD2L	DPAGT1;H2AFX	NLRX1	ABCG4;C1QTNF5;CBL;SLC37A4	H2AFX	DPAGT1;H2AFX	na	na	na	H2AFX	C2CD2L;DPAGT1;NLRX1;PHLDB1;TREH	ABCG4;DDX6;HINFP;IFT46;PDZD3;RPL5P30;TMEM25
rs748962992	logTG	11	119834755	G	T	0.998973	0.158	0.0303	6.73449	7.84822	1	na	na	na	na	na	ARHGEF12	TRIM29	na	TMEM136	na	na	na	na	na	na	na	na	ARHGEF12;TMEM136;TRIM29
rs772703454	logTG	11	120559994	C	A	0.999191	0.1647	0.0359	5.34866	7.85003	1	na	na	na	na	na	ARHGEF12	GRIK4	na	TMEM136	na	na	na	na	na	na	na	na	ARHGEF12;GRIK4;TMEM136
rs3862606	LDL	11	121330087	G	A	0.426028	0.0086	0.0013	10.4311	10.0767	0.001606	na	SORL1	na	SORL1	na	na	SORL1	na	na	SC5D	na	na	na	na	na	SORL1	na	na
rs1666658	HDL	11	121801129	C	T	0.352636	-0.0096	0.0013	12.8156	8.76076	0.5331	na	na	na	SORL1	na	na	BLID	na	na	na	na	na	na	na	na	na	na	BLID;SORL1
rs10892870	HDL	11	122517803	G	A	0.391838	0.0234	0.0013	71.7104	66.0059	0.2314	na	UBASH3B	na	UBASH3B	UBASH3B	HSPA8	UBASH3B	na	UBASH3B	na	na	na	na	na	UBASH3B	na	na	HSPA8
rs7930518	LDL	11	122523596	G	A	0.604518	-0.0155	0.0013	32.0471	27.8341	0.05144	na	UBASH3B	UBASH3B	UBASH3B	UBASH3B	na	UBASH3B	na	BSX	na	na	na	na	na	na	UBASH3B	na	BSX
rs7930518	TC	11	122523596	G	A	0.60459	-0.0216	0.0012	71.7104	59.4694	0.2472	na	UBASH3B	UBASH3B	UBASH3B	UBASH3B	HSPA8	UBASH3B	na	na	na	na	na	na	na	na	UBASH3B	na	HSPA8
rs7129071	nonHDL	11	122527120	G	A	0.647036	-0.0164	0.0015	27.0977	23.9663	0.0005311	na	UBASH3B	UBASH3B	UBASH3B	UBASH3B	na	UBASH3B	na	na	na	na	na	na	na	na	UBASH3B	na	na
rs112771035	HDL	11	126225876	G	C	0.0693318	-0.0356	0.0024	49.0497	39.6141	0.3022	na	ST3GAL4;GSEC;TIRAP	GSEC	RP11-50B3.2;RPUSD4;FAM118B;SRPR;FOXRED1;TIRAP;DCPS;ST3GAL4	RPUSD4;SRPR;FOXRED1;TIRAP;DCPS;ST3GAL4	TIRAP	ST3GAL4	ST3GAL4	na	na	TIRAP	ST3GAL4	na	na	ST3GAL4	TIRAP	na	DCPS;FAM118B;FOXRED1;GSEC;RP11-50B3.2;RPUSD4;SRPR
rs112771035	LDL	11	126225876	G	C	0.0678473	0.0622	0.0025	135.912	123.646	0.7522	na	GSEC;ST3GAL4;TIRAP	GSEC	RP11-50B3.2;RPUSD4;FAM118B;SRPR;FOXRED1;TIRAP;DCPS;ST3GAL4	RPUSD4;SRPR;FOXRED1;TIRAP;DCPS;ST3GAL4	ST3GAL4	ST3GAL4	ST3GAL4	na	na	ST3GAL4	ST3GAL4	na	ST3GAL4	na	na	TIRAP	DCPS;FAM118B;FOXRED1;GSEC;RP11-50B3.2;RPUSD4;SRPR
rs112771035	nonHDL	11	126225876	G	C	0.072704	0.0597	0.0028	100.144	88.9888	0.1241	na	ST3GAL4;TIRAP;GSEC	GSEC	RPUSD4;FAM118B;SRPR;TIRAP;DCPS;ST3GAL4	RPUSD4;SRPR;TIRAP;DCPS;ST3GAL4	FOXRED1	ST3GAL4	ST3GAL4	na	na	na	ST3GAL4	na	na	ST3GAL4	na	TIRAP	DCPS;FAM118B;FOXRED1;GSEC;RPUSD4;SRPR
rs74612335	TC	11	126238633	C	T	0.147964	0.0341	0.0017	88.772	76.9061	0.1807	na	ST3GAL4;GSEC	ST3GAL4	RPUSD4;FAM118B;SRPR;TIRAP;DCPS;ST3GAL4	RPUSD4;SRPR;TIRAP;DCPS;ST3GAL4	FOXRED1	ST3GAL4	ST3GAL4	na	na	na	ST3GAL4	na	na	ST3GAL4	na	na	DCPS;FAM118B;FOXRED1;GSEC;RPUSD4;SRPR;TIRAP
rs2369280	logTG	12	508859	G	T	0.280603	0.0093	0.0015	9.24823	7.37415	0.04454	na	CCDC77;KDM5A	na	CCDC77	na	WNK1	CCDC77	KDM5A	na	na	na	KDM5A	na	na	na	CCDC77	KDM5A	WNK1
rs35882350	LDL	12	623129	G	A	0.240055	0.0182	0.0015	33.1529	26.3964	0.8295	na	B4GALNT3	na	B4GALNT3	B4GALNT3	WNK1	B4GALNT3	na	na	na	na	na	na	na	na	B4GALNT3	na	WNK1
rs35882350	nonHDL	12	623129	G	A	0.234774	0.0216	0.0018	32.4494	28.5086	0.00852	na	B4GALNT3	na	B4GALNT3;ERC1	na	WNK1	B4GALNT3	na	na	na	na	na	na	na	na	B4GALNT3	na	ERC1;WNK1
rs35882350	TC	12	623129	G	A	0.233002	0.0164	0.0015	27.0977	21.8293	0.771	na	B4GALNT3	na	B4GALNT3	na	WNK1	B4GALNT3	na	na	na	na	na	na	na	na	B4GALNT3	na	WNK1
rs56196860	HDL	12	2908330	C	A	0.973121	-0.031	0.0043	12.25	10.2347	0.05912	na	na	na	na	na	FKBP4	FKBP4	FKBP4	CBX3P4;RP4-816N1.7;RP4-816N1.6;FKBP4	na	FKBP4	FKBP4	na	na	FKBP4	na	na	CBX3P4;RP4-816N1.6;RP4-816N1.7
rs76895963	LDL	12	4384844	G	T	0.0181536	-0.0543	0.0055	22.2623	18.5952	0.7724	na	CCND2	CCND2	CCND2	CCND2	na	CCND2	na	na	C12orf4;FGF23	na	na	na	na	na	CCND2	na	na
rs76895963	logTG	12	4384844	G	T	0.0180779	-0.1021	0.0055	76.1988	68.59	0.288	na	CCND2	CCND2	CCND2	CCND2	na	CCND2	CCND2	na	C12orf4;FGF23	na	CCND2	na	na	CCND2	na	na	na
rs76895963	nonHDL	12	4384844	G	T	0.01926	-0.0754	0.0063	32.283	28.3362	0.1205	na	CCND2	CCND2	CCND2	CCND2	FGF23	CCND2	na	na	C12orf4;FGF23	na	na	na	na	na	CCND2	na	FGF23
rs76895963	TC	12	4384844	G	T	0.0182297	-0.0729	0.0053	42.3214	34.6841	0.8141	na	CCND2	CCND2	CCND2	CCND2	na	CCND2	na	na	C12orf4;FGF23	na	na	na	na	na	CCND2	na	na
rs3217805	HDL	12	4388084	G	C	0.359425	0.0095	0.0014	10.9374	7.65037	0.1351	na	na	na	CCND2	CCND2	na	CCND2	CCND2	CCND2-AS2;CCND2;CCND2-AS1	C12orf4;FGF23	na	CCND2	na	na	CCND2	na	na	CCND2-AS1;CCND2-AS2
rs1734114	HDL	12	6713450	G	A	0.212615	-0.0162	0.0016	23.3686	21.0004	0.001955	na	na	na	RP1-102E24.8	na	CHD4	CHD4	CHD4;NOP2	na	ATN1;LPCAT3;TAPBPL	CHD4	CHD4	na	na	na	CHD4	na	NOP2;RP1-102E24.8
rs35104374	logTG	12	6739497	C	T	0.727528	-0.0102	0.0015	10.9804	7.75762	0.4041	na	LPAR5	LPAR5	IFFO1;NOP2;CHD4;LPAR5;ACRBP;COPS7A;MLF2	LPAR5;ACRBP;COPS7A	CHD4	LPAR5	na	CHD4;NOP2;IFFO1;SCARNA11;RP5-940J5.6	ATN1;LPCAT3;TAPBPL	CHD4	na	na	na	na	CHD4;LPAR5	IFFO1;NOP2	ACRBP;COPS7A;MLF2;RP5-940J5.6;SCARNA11
rs117692263	nonHDL	12	7625014	C	T	0.0869812	-0.0178	0.0026	11.12	7.64642	0.4873	na	CD163L1	na	CD163L1	CD163L1	SLC2A3	CD163L1	CD163	PEX5;CD163L1;CLSTN3;C1R;C1RL;ACSM4	APOBEC1;CLEC4C;LPCAT3	na	na	na	na	CD163L1	na	na	ACSM4;C1R;C1RL;CD163;CLSTN3;PEX5;SLC2A3
rs7305678	HDL	12	7681181	G	T	0.804387	-0.0192	0.0017	28.8529	25.2423	0.002731	na	AC092111.2;P3H3;CD163L1	na	CD163L1	CD163L1	PEX5	CD163	CD163	na	APOBEC1;CLEC4C	na	CD163	na	na	na	na	CD163;CD163L1	AC092111.2;P3H3;PEX5
rs4883201	HDL	12	9082581	G	A	0.113039	-0.0277	0.002	42.8955	35.0811	0.3341	na	M6PR	M6PR	PHC1;M6PR;KLRG1;A2M;PZP;LINC00987	PHC1;M6PR;KLRG1;A2M;LINC00987	na	PHC1	M6PR	na	PZP	na	M6PR	na	na	na	M6PR	PHC1	A2M;KLRG1;LINC00987;PZP
rs4883201	LDL	12	9082581	G	A	0.11287	-0.0243	0.002	33.2413	27.7716	0.42	na	M6PR	M6PR	PHC1;M6PR;KLRG1;A2M;PZP;LINC00987	PHC1;M6PR;KLRG1;A2M;LINC00987	AICDA	PHC1	na	na	PZP	na	na	na	na	na	na	M6PR;PHC1	A2M;AICDA;KLRG1;LINC00987;PZP
rs4883201	nonHDL	12	9082581	G	A	0.122036	-0.0246	0.0023	25.972	22.9688	0.003796	na	M6PR	M6PR	PHC1;M6PR;KLRG1;A2M;PZP	PHC1;M6PR;KLRG1;A2M	M6PR	PHC1	M6PR	na	PZP	M6PR	M6PR	na	na	M6PR	na	PHC1	A2M;KLRG1;PZP
rs4883201	TC	12	9082581	G	A	0.112682	-0.0319	0.0019	62.5355	52.1854	0.0589	na	M6PR	M6PR	PHC1;M6PR;KLRG1;A2M;PZP;LINC00987;RP13-735L24.1	PHC1;M6PR;KLRG1;A2M;LINC00987	M6PR	PHC1	M6PR	na	PZP	M6PR	M6PR	na	na	M6PR	na	PHC1	A2M;KLRG1;LINC00987;PZP;RP13-735L24.1
rs74976859	HDL	12	13345397	G	T	0.137904	0.0128	0.0018	11.9389	7.65158	0.8656	na	na	na	na	na	CDKN1B	EMP1	EMP1	na	CDKN1B	na	EMP1	na	na	na	na	EMP1	CDKN1B
rs9332891	HDL	12	16503789	G	T	0.00425577	-0.1288	0.0134	21.1476	14.5181	0.8379	na	na	na	na	na	MGST1	MGST1	na	na	na	MGST1	na	na	na	na	na	MGST1	na
rs11045171	logTG	12	20470199	G	A	0.189815	-0.0195	0.0016	33.4409	30.7452	0.0701	na	na	na	PDE3A;SLCO1C1	PDE3A	PDE3A	PDE3A	PDE3A	na	SLCO1B3	PDE3A	PDE3A	na	na	PDE3A	na	na	SLCO1C1
rs11045172	HDL	12	20470221	C	A	0.189614	0.0267	0.0016	61.7916	52.7584	0.6254	na	na	na	na	na	PDE3A	PDE3A	PDE3A	na	SLCO1B3	PDE3A	PDE3A	na	na	na	PDE3A	na	na
rs73079476	logTG	12	21343833	C	A	0.15226	0.0263	0.0017	53.2612	43.8456	0.7383	na	na	na	SLCO1C1	na	na	SLCO1B1	SLCO1B1	SLCO1B1;RP11-125O5.2	GYS2;LDHB;SLCO1B1;SLCO1B3	na	SLCO1B1	na	na	na	SLCO1B1	na	RP11-125O5.2;SLCO1C1
rs11046481	logTG	12	22747967	G	T	0.208543	-0.0155	0.0016	21.4675	15.8627	0.7003	na	na	na	RP11-268P4.5;ETNK1;RP11-449P1.1	ETNK1	na	ETNK1	na	na	C2CD5	na	na	na	na	na	na	ETNK1	RP11-268P4.5;RP11-449P1.1
rs12320328	nonHDL	12	25408464	G	A	0.0842678	-0.0274	0.0027	23.4715	25.5824	1.08e-07	na	na	na	KRAS	na	na	KRAS	KRAS	na	na	na	KRAS	na	na	na	KRAS	na	na
rs75667995	LDL	12	25409070	C	T	0.0623063	-0.0285	0.0027	25.3198	22.37	0.1019	na	na	na	KRAS	na	na	KRAS	na	na	na	na	na	na	na	na	na	KRAS	na
rs75667995	logTG	12	25409070	C	T	0.0624079	-0.0201	0.0027	13.0116	10.3066	0.03985	na	na	na	KRAS	na	KRAS	KRAS	na	na	na	KRAS	na	na	na	na	KRAS	na	na
rs75667995	TC	12	25409070	C	T	0.0623657	-0.0331	0.0026	36.3991	31.6204	0.1039	na	na	na	KRAS	na	na	KRAS	KRAS	na	na	na	KRAS	na	na	na	KRAS	na	na
rs12814794	HDL	12	26440698	G	A	0.301576	-0.0121	0.0014	17.261	14.7608	0.01105	na	BHLHE41;AC022509.3	na	na	na	na	SSPN	ITPR2	na	na	na	na	na	na	na	na	na	AC022509.3;BHLHE41;ITPR2;SSPN
rs7132434	logTG	12	26472562	G	A	0.697046	-0.0147	0.0014	25.0636	21.2423	0.05239	na	BHLHE41;AC022509.3	na	BHLHE41	BHLHE41	ITPR2	ITPR2	ITPR2;SSPN	na	na	ITPR2	ITPR2	na	na	na	ITPR2	BHLHE41	AC022509.3;SSPN
rs7969023	TC	12	26803949	C	T	0.380261	0.009	0.0012	13.1951	9.41526	0.3534	na	ITPR2	na	na	na	na	ITPR2	ITPR2	ITPR2	na	na	ITPR2	na	na	ITPR2	na	na	na
rs966541	LDL	12	29491528	G	A	0.306679	-0.0093	0.0014	10.5119	7.9887	0.5748	na	AC009318.1;ERGIC2;AC009318.4	AC009318.1;AC009318.4;ERGIC2	ERGIC2	ERGIC2	na	FAR2	na	na	FAR2	na	na	na	na	na	na	ERGIC2	AC009318.1;AC009318.4;FAR2
rs966541	TC	12	29491528	G	A	0.310466	-0.0141	0.0013	26.6819	21.4705	0.6354	na	AC009318.1;ERGIC2;AC009318.2;AC009318.4	ERGIC2;AC009318.4;AC009318.1	ERGIC2	ERGIC2	na	FAR2	na	na	FAR2	na	na	na	na	na	na	ERGIC2	AC009318.1;AC009318.2;AC009318.4;FAR2
rs10843390	nonHDL	12	29496991	C	T	0.694811	0.0137	0.0016	16.9568	13.4185	0.3866	na	AC009318.1;AC009318.4	AC009318.1	ERGIC2	ERGIC2	na	ERGIC2	na	na	FAR2	na	na	na	na	na	na	ERGIC2	AC009318.1;AC009318.4
rs10843391	logTG	12	29508642	G	A	0.318812	-0.0122	0.0013	20.1997	15.4405	0.06763	na	AC009318.1	AC009318.1	ERGIC2	ERGIC2	na	ERGIC2	na	na	FAR2	na	na	na	na	na	na	ERGIC2	AC009318.1
rs11052705	HDL	12	33588388	C	T	0.647425	-0.0089	0.0014	9.6871	8.01402	0.01493	na	na	na	na	na	na	SYT10	PKP2	na	na	na	na	na	na	na	na	na	PKP2;SYT10
rs2638250	nonHDL	12	40565161	C	A	0.884363	-0.018	0.0023	14.2982	13.6583	0.001658	na	na	na	LRRK2	LRRK2	na	LRRK2	na	na	LRRK2	na	na	na	na	na	na	LRRK2	na
rs2638250	TC	12	40565161	C	A	0.886037	-0.0164	0.0019	17.2182	14.9469	0.005699	na	na	na	LRRK2	LRRK2	na	LRRK2	na	na	LRRK2	na	na	na	na	na	na	LRRK2	na
rs11175518	LDL	12	40580318	C	T	0.0816798	0.0204	0.0023	18.1341	17.0437	0.001793	na	na	na	LRRK2	LRRK2	MUC19	LRRK2	na	na	LRRK2	na	na	na	na	na	na	LRRK2	MUC19
rs7298844	logTG	12	46224063	G	A	0.185632	0.0154	0.0016	21.2027	15.7889	0.8604	na	na	na	RP11-352M15.2;SCAF11	SCAF11	ARID2	ARID2	SCAF11;ARID2	na	ANO6	ARID2	SCAF11;ARID2	na	na	na	ARID2	SCAF11	RP11-352M15.2
rs10880868	TC	12	46322449	C	T	0.811518	-0.0122	0.0016	13.6125	10.6002	0.7594	na	na	na	RP11-352M15.2;SCAF11	SCAF11	ARID2	SCAF11	SCAF11;ARID2	na	ANO6;SLC38A2	na	SCAF11	na	na	na	SCAF11	ARID2	RP11-352M15.2
rs145878042	logTG	12	48143315	G	A	0.0104559	0.0443	0.0064	11.351	9.44344	0.0102	na	na	na	na	na	HDAC7	RAPGEF3	HDAC7	SLC48A1;RAPGEF3	RAPGEF3	na	na	na	na	na	na	HDAC7;RAPGEF3	SLC48A1
rs1126930	HDL	12	49399132	G	C	0.968438	0.0295	0.0038	14.0818	10.0363	0.9814	na	na	na	na	na	ADCY6	PRKAG1	MLL2;TMBIM6;LMBR1L;FMNL3;MCRS1;DNAJC22;PRPF40B;SPATS2	PRKAG1;RP11-386G11.5	WNT1	na	na	na	na	na	na	PRKAG1	ADCY6;DNAJC22;FMNL3;LMBR1L;MCRS1;MLL2;PRPF40B;RP11-386G11.5;SPATS2;TMBIM6
rs1126930	logTG	12	49399132	G	C	0.968223	-0.0274	0.0037	12.8836	8.88631	0.6392	na	na	na	CACNB3	na	FKBP11	PRKAG1	MLL2;TMBIM6;FMNL3;LMBR1L;PRPF40B;DNAJC22;SPATS2;MCRS1;FKBP11	PRKAG1;RP11-386G11.5	WNT1	na	na	na	na	na	na	FKBP11;PRKAG1	CACNB3;DNAJC22;FMNL3;LMBR1L;MCRS1;MLL2;PRPF40B;RP11-386G11.5;SPATS2;TMBIM6
rs149806222	LDL	12	50127304	ATAATAT	A	0.979408	0.0296	0.0047	9.52034	7.95915	0.1088	GPD1	LIMA1;FAM186A	na	TMBIM6;ASIC1;SMARCD1;COX14;CERS5;LIMA1	TMBIM6;ASIC1;COX14	SMARCD1	TMBIM6	TMBIM6;FMNL3	BCDIN3D	LIMA1	SMARCD1	TMBIM6	na	na	na	TMBIM6	LIMA1;SMARCD1	ASIC1;BCDIN3D;CERS5;COX14;FAM186A;FMNL3
rs149806222	nonHDL	12	50127304	ATAATAT	A	0.978615	0.0356	0.0053	10.7316	8.84879	0.02548	GPD1	LIMA1	na	TMBIM6;ASIC1;SMARCD1;COX14;CERS5;LIMA1	TMBIM6;ASIC1;SMARCD1;COX14;LIMA1	SMARCD1	TMBIM6	TMBIM6;MCRS1;FMNL3	CERS5;RP4-605O3.4	LIMA1	SMARCD1	TMBIM6	na	na	na	TMBIM6	CERS5;LIMA1;SMARCD1	ASIC1;COX14;FMNL3;MCRS1;RP4-605O3.4
rs149806222	TC	12	50127304	ATAATAT	A	0.978623	0.0365	0.0043	16.6787	13.9667	0.009772	GPD1	LIMA1;FAM186A	na	FMNL3;TMBIM6;ASIC1;SMARCD1;COX14;CERS5;LIMA1	TMBIM6;ASIC1;SMARCD1;COX14;LIMA1	SMARCD1	TMBIM6	TMBIM6;FMNL3;MCRS1	na	LIMA1	SMARCD1	TMBIM6;FMNL3	na	na	na	TMBIM6	FMNL3;LIMA1;SMARCD1	ASIC1;CERS5;COX14;FAM186A;MCRS1
rs7132908	HDL	12	50263148	G	A	0.641815	0.0122	0.0013	20.1997	14.8524	0.6088	GPD1	na	na	TMBIM6;ASIC1;SMARCD1;COX14;CERS5;LIMA1;FAM186A	TMBIM6;ASIC1;COX14	GPD1	FAIM2	na	na	LIMA1	na	na	na	na	na	na	na	ASIC1;CERS5;COX14;FAIM2;FAM186A;GPD1;LIMA1;SMARCD1;TMBIM6
rs2251024	LDL	12	51103633	C	T	0.692379	0.0165	0.0014	31.3349	26.6079	0.1598	na	na	na	LIMA1;FAM186A;LARP4;DIP2B;ATF1;METTL7A;RP11-407N8.6	ATF1	SLC11A2	DIP2B	DIP2B;LIMA1;LARP4	na	LIMA1	na	DIP2B;LIMA1;LARP4	na	na	na	DIP2B	LARP4;LIMA1	ATF1;FAM186A;METTL7A;RP11-407N8.6;SLC11A2
rs2251024	nonHDL	12	51103633	C	T	0.688357	0.0166	0.0017	21.797	18.7906	0.3961	na	DIP2B	na	LIMA1;FAM186A;LARP4;DIP2B;ATF1;METTL7A;TFCP2	LIMA1;DIP2B;ATF1	SLC11A2	DIP2B	LIMA1;DIP2B;LARP4	na	LIMA1	na	LIMA1;DIP2B;LARP4	na	na	DIP2B	na	LARP4;LIMA1	ATF1;FAM186A;METTL7A;SLC11A2;TFCP2
rs2251024	TC	12	51103633	C	T	0.691691	0.0183	0.0014	38.3192	33.865	0.2197	na	na	na	LIMA1;FAM186A;LARP4;DIP2B;ATF1;METTL7A;RP11-407N8.6;SLC11A2;LETMD1;TFCP2	LIMA1;LARP4;DIP2B;ATF1;SLC11A2;TFCP2	SLC11A2	DIP2B	DIP2B;ATF1;LIMA1;LARP4	na	LIMA1	SLC11A2	DIP2B;ATF1;LIMA1;LARP4	na	na	na	DIP2B	ATF1;LARP4;LIMA1;SLC11A2	FAM186A;LETMD1;METTL7A;RP11-407N8.6;TFCP2
rs11169570	HDL	12	51211692	G	A	0.378617	0.0096	0.0013	12.8156	11.2449	0.0164	na	na	na	FAM186A;LARP4;DIP2B;ATF1;METTL7A;RP11-407N8.6;BIN2	ATF1	LETMD1	ATF1	METTL7A;ATF1;LIMA1;DIP2B;LARP4	ATF1;RP11-60E8.4	na	na	METTL7A;ATF1;DIP2B;LARP4	na	na	ATF1	na	DIP2B;LARP4;METTL7A	BIN2;FAM186A;LETMD1;LIMA1;RP11-407N8.6;RP11-60E8.4
rs61177162	TC	12	51779544	AG	A	0.536343	0.016	0.0015	25.8364	22.3367	0.1374	na	SLC4A8;BIN2	na	METTL7A;RP11-407N8.6;SLC11A2;LETMD1;TFCP2;BIN2;GALNT6;SLC4A8	SLC11A2;TFCP2;GALNT6;SLC4A8	SMAGP	GALNT6	GALNT6	na	na	na	GALNT6	na	na	na	GALNT6	BIN2;SLC4A8	LETMD1;METTL7A;RP11-407N8.6;SLC11A2;SMAGP;TFCP2
rs10876169	LDL	12	51783420	T	A	0.623144	0.0127	0.0013	21.8164	17.6234	0.1231	na	BIN2;GALNT6;FAM186A	GALNT6	METTL7A;RP11-407N8.6;BIN2;GALNT6;SLC4A8	GALNT6;SLC4A8	SMAGP	GALNT6	na	SLC4A8	na	na	na	na	na	na	GALNT6	BIN2;SLC4A8	FAM186A;METTL7A;RP11-407N8.6;SMAGP
rs907348	nonHDL	12	51788340	C	T	0.629958	-0.0113	0.0016	11.7864	12.3987	0.001225	na	ATF1;SLC4A8	ATF1;SLC4A8	METTL7A;TFCP2;BIN2;GALNT6;SLC4A8	GALNT6;SLC4A8	SLC11A2	SLC4A8	na	na	na	na	na	na	na	na	SLC4A8	na	ATF1;BIN2;GALNT6;METTL7A;SLC11A2;TFCP2
rs7316678	LDL	12	53265945	C	T	0.40196	-0.0097	0.0013	13.0679	9.70514	0.4096	na	TNS2;EIF4B;AC068888.1;AC068888.2	EIF4B;AC068888.1;TNS2;AC068888.2	KRT8;EIF4B;TNS2;IGFBP6;ESPL1;PFDN5;C12orf10;SP7	KRT8;EIF4B;TNS2	SOAT2	KRT78	KRT78	na	SOAT2	na	KRT78	na	na	na	na	EIF4B;KRT78;TNS2	AC068888.1;AC068888.2;C12orf10;ESPL1;IGFBP6;KRT8;PFDN5;SOAT2;SP7
rs11170385	TC	12	53443278	G	T	0.512171	-0.0079	0.0013	8.91183	8.3814	0.002944	na	AC068888.1;TENC1;EIF4B;AC068888.2	TENC1;EIF4B;AC068888.2;AC068888.1	KRT8;EIF4B;TENC1;IGFBP6;SP1	KRT8;TENC1	SOAT2	TENC1	TENC1;EIF4B	na	SOAT2	na	EIF4B;TENC1	na	na	TENC1	EIF4B	na	AC068888.1;AC068888.2;IGFBP6;KRT8;SOAT2;SP1
rs2608301	LDL	12	53793314	C	A	0.790486	-0.0127	0.0016	14.6855	11.6184	0.1628	na	na	na	KRT8;EIF4B;TNS2;IGFBP6;ESPL1;PFDN5;C12orf10;SP7;SP1;AMHR2;PRR13;PCBP2;MAP3K12;TARBP2;NPFF	KRT8;EIF4B;TNS2;SP1;AMHR2;PRR13;PCBP2;TARBP2	SOAT2	SP1	PCBP2;SP1;ATF7	na	SOAT2	na	PCBP2;SP1	na	na	na	SP1	PCBP2	AMHR2;ATF7;C12orf10;EIF4B;ESPL1;IGFBP6;KRT8;MAP3K12;NPFF;PFDN5;PRR13;SOAT2;SP7;TARBP2;TNS2
rs11170538	HDL	12	53796744	C	T	0.540965	-0.0138	0.0014	22.1949	20.705	4.57e-05	na	na	na	KRT8;EIF4B;TNS2;IGFBP6;ESPL1;PFDN5;C12orf10;SP7;SP1;AMHR2;PRR13;PCBP2;MAP3K12;TARBP2;NPFF	KRT8;EIF4B;TNS2;SP1;AMHR2;PRR13;PCBP2;TARBP2	EIF4B	SP1	SP1;PCBP2	na	SOAT2	EIF4B	SP1;PCBP2	na	na	na	SP1	EIF4B;PCBP2	AMHR2;C12orf10;ESPL1;IGFBP6;KRT8;MAP3K12;NPFF;PFDN5;PRR13;SP7;TARBP2;TNS2
rs10783578	logTG	12	53796754	G	A	0.468573	-0.0094	0.0014	10.7236	11.2171	0.002674	na	LINC02381	na	ESPL1;PFDN5;C12orf10;AAAS;SP7;AMHR2;MAP3K12	ESPL1;C12orf10;MAP3K12	SP1	SP1	SP1;PCBP2	na	SOAT2	SP1	SP1	na	na	na	SP1	na	AAAS;AMHR2;C12orf10;ESPL1;LINC02381;MAP3K12;PCBP2;PFDN5;SP7
rs80297745	nonHDL	12	53801461	C	A	0.823647	-0.0142	0.0019	13.108	10.3404	0.1916	na	na	na	KRT8;C12orf10;SP7;SP1;AMHR2;PRR13;PCBP2;MAP3K12;TARBP2	KRT8;SP1;AMHR2;PRR13;PCBP2;TARBP2	SOAT2	SP1	PCBP2;ATF7;SP1	AMHR2	SOAT2	na	PCBP2;SP1	na	na	na	SP1	AMHR2;PCBP2	ATF7;C12orf10;KRT8;MAP3K12;PRR13;SOAT2;SP7;TARBP2
rs11171739	HDL	12	56470625	C	T	0.427967	0.0104	0.0013	14.9051	14.3131	0.0003505	na	SUOX;RPS26;ZC3H10;ERBB3;GDF11;IKZF4	na	na	na	PAN2	ERBB3	SUOX;IKZF4	ERBB3	APOF;CNPY2	na	SUOX;IKZF4	na	na	na	ERBB3	IKZF4;SUOX	GDF11;PAN2;RPS26;ZC3H10
rs7312441	logTG	12	56941146	C	A	0.658332	0.0098	0.0013	13.3228	10.7621	0.02716	na	na	na	ERBB3;STAT2;TIMELESS;MIP;SPRYD4;GLS2;RBMS2;PRIM1;HSD17B6	ERBB3;SPRYD4;GLS2;PRIM1;HSD17B6	SMARCC2	RBMS2	RBMS2;SPRYD4	SPRYD4	APOF;CNPY2;GPR182;PTGES3	na	RBMS2;SPRYD4	na	na	na	RBMS2;SPRYD4	na	ERBB3;GLS2;HSD17B6;MIP;PRIM1;SMARCC2;STAT2;TIMELESS
rs9739473	TC	12	57313335	T	A	0.598082	0.0079	0.0012	10.3372	8.85382	0.003784	na	na	na	NAB2;STAT6;STAC3;R3HDM2	NAB2;R3HDM2	LRP1	SDR9C7	GPR182;RDH16;SDR9C7	na	GPR182;LRP1;NAB2;NXPH4;PTGES3;STAT6	na	SDR9C7	na	na	na	na	SDR9C7	GPR182;LRP1;NAB2;R3HDM2;RDH16;STAC3;STAT6
rs11172134	LDL	12	57645789	T	A	0.803609	0.0146	0.0016	19.1443	14.2516	0.9913	na	na	na	NDUFA4L2;STAC3;R3HDM2;DTX3	NDUFA4L2;R3HDM2	LRP1	RP11-123K3.4	INHBC	INHBC;INHBE	DDIT3;GPR182;LRP1;NAB2;NXPH4;STAT6	na	INHBC	na	na	na	na	INHBC	DTX3;INHBE;LRP1;NDUFA4L2;R3HDM2;RP11-123K3.4;STAC3
rs12313762	nonHDL	12	57692470	C	T	0.771548	0.0226	0.0018	35.4311	29.9724	0.7132	na	na	na	NXPH4;NDUFA4L2;STAC3;R3HDM2;GLI1;DTX3	NDUFA4L2;STAC3;R3HDM2	LRP1	R3HDM2	INHBC	INHBC;INHBE	CYP27B1;DDIT3;GPR182;LRP1;NAB2;NXPH4;STAT6	na	INHBC	na	na	na	na	INHBC;R3HDM2	DTX3;GLI1;INHBE;LRP1;NDUFA4L2;NXPH4;STAC3
rs7964492	HDL	12	57823585	C	A	0.224987	0.0277	0.0015	75.4168	63.6596	0.7346	na	na	na	NDUFA4L2;STAC3;R3HDM2;DTX3;RP11-571M6.17;CTDSP2	NDUFA4L2;R3HDM2	LRP1	R3HDM2	INHBC;R3HDM2	INHBC;INHBE;STAT6;NAB2	CYP27B1;DDIT3;GPR182;LRP1;NAB2;NXPH4;STAT6	na	R3HDM2;INHBC	na	na	na	R3HDM2	INHBC	CTDSP2;DTX3;INHBE;LRP1;NAB2;NDUFA4L2;RP11-571M6.17;STAC3;STAT6
rs7964492	logTG	12	57823585	C	A	0.228796	-0.0243	0.0015	58.2973	51.3742	0.5868	na	na	na	LRP1;NXPH4;SHMT2;NDUFA4L2;STAC3;R3HDM2;INHBE;GLI1;ARHGAP9;MARS;DDIT3;DTX3;SLC26A10	NXPH4;NDUFA4L2;STAC3;R3HDM2;MARS	LRP1	R3HDM2	INHBC;R3HDM2	INHBC;INHBE	CYP27B1;DDIT3;GPR182;LRP1;NAB2;NXPH4;STAT6	LRP1	R3HDM2;INHBC	na	na	na	R3HDM2	INHBC;INHBE;LRP1	ARHGAP9;DDIT3;DTX3;GLI1;MARS;NDUFA4L2;NXPH4;SHMT2;SLC26A10;STAC3
rs10877029	TC	12	58256010	C	T	0.380242	0.0086	0.0013	10.4311	7.50145	0.2096	na	na	na	R3HDM2;CDK4;METTL21B;TSFM;AVIL;CTDSP2	R3HDM2;METTL21B;AVIL;CTDSP2	DDIT3	CTDSP2	CTDSP2;TSFM	na	CYP27B1;DDIT3	na	CTDSP2;TSFM	na	na	na	CTDSP2	TSFM	AVIL;CDK4;DDIT3;METTL21B;R3HDM2
rs113439801	logTG	12	62838230	C	T	0.854222	0.0127	0.0018	11.7647	8.04874	0.8784	na	na	na	FAM19A2;USP15;MON2;LINC01465;RP11-631N16.2	USP15;LINC01465	MON2	MON2	MON2	na	na	MON2	MON2	na	na	MON2	na	na	FAM19A2;LINC01465;RP11-631N16.2;USP15
rs12229749	logTG	12	63503447	C	T	0.659271	0.0097	0.0013	13.0679	10.0887	0.007814	na	na	na	RP11-631N16.2;AVPR1A	AVPR1A	na	AVPR1A	AVPR1A	na	na	na	AVPR1A	na	na	na	AVPR1A	na	RP11-631N16.2
rs2947795	logTG	12	66206798	C	T	0.203488	0.0125	0.0017	12.7124	10.8707	0.02765	na	na	na	na	na	HMGA2	HMGA2	HMGA2	na	na	HMGA2	HMGA2	na	na	na	HMGA2	na	na
rs343087	TC	12	66260924	G	A	0.790292	-0.0108	0.0017	9.67523	7.93578	0.09515	na	na	na	na	na	HMGA2	HMGA2	na	na	na	HMGA2	na	na	na	na	na	HMGA2	na
rs139934847	HDL	12	67689927	TA	T	0.462241	-0.01	0.0013	13.8401	9.18994	0.2934	na	na	na	na	na	na	CAND1	CAND1	na	na	na	CAND1	na	na	na	na	CAND1	na
rs4761233	logTG	12	69722880	C	T	0.422596	-0.0094	0.0013	12.3185	10.2197	0.05027	na	na	na	CPSF6;RP11-1143G9.5;LYZ;YEATS4	CPSF6;RP11-1143G9.5;LYZ;YEATS4	MDM2	LYZ	CPSF6;LYZ	na	RAB3IP	na	CPSF6;LYZ	na	na	na	LYZ	CPSF6	MDM2;RP11-1143G9.5;YEATS4
rs56339634	HDL	12	69868820	C	CAT	0.35007	-0.0106	0.0014	13.4328	10.215	0.389	na	na	na	na	na	na	FRS2	FRS2	na	RAB3IP	na	FRS2	na	na	na	na	FRS2	na
rs61754230	LDL	12	72179446	C	T	0.983355	-0.0494	0.0056	17.9469	14.8703	0.6438	na	na	na	RAB21	RAB21	ZFC3H1	RAB21	RAB21	RAB21	na	na	RAB21	na	na	RAB21	na	na	ZFC3H1
rs61754230	nonHDL	12	72179446	C	T	0.98288	-0.058	0.0069	16.3716	12.7852	0.4473	na	na	na	RAB21	RAB21	ZFC3H1	RAB21	RAB21	RAB21	na	na	RAB21	na	na	RAB21	na	na	ZFC3H1
rs61754230	TC	12	72179446	C	T	0.983287	-0.0478	0.0054	18.0651	14.388	0.7557	na	na	na	RAB21	RAB21	ZFC3H1	RAB21	RAB21	RAB21	na	na	RAB21	na	na	RAB21	na	na	ZFC3H1
rs2126606	HDL	12	89674799	C	T	0.366165	-0.0107	0.0013	15.7305	9.71043	0.7689	na	na	na	POC1B;GALNT4;ATP2B1	na	ATP2B1	DUSP6	DUSP6	na	na	ATP2B1	DUSP6	na	na	na	na	ATP2B1;DUSP6	GALNT4;POC1B
rs111848146	nonHDL	12	89874816	C	CAGGGCCTAATTGTT	0.28036	0.0127	0.0019	10.6342	7.63249	0.2823	na	na	na	GALNT4	na	na	POC1B	na	GALNT4;POC1B;POC1B-GALNT4;RP11-734K2.4	na	na	na	na	na	na	na	GALNT4;POC1B	POC1B-GALNT4;RP11-734K2.4
rs876554	TC	12	89885473	C	T	0.494459	0.0081	0.0012	10.8302	7.50165	0.6231	na	POC1B-AS1	na	POC1B;GALNT4;ATP2B1	na	na	POC1B	POC1B	POC1B;GALNT4;POC1B-GALNT4;RP11-734K2.4	na	na	POC1B	na	na	POC1B	na	GALNT4	ATP2B1;POC1B-AS1;POC1B-GALNT4;RP11-734K2.4
rs12306780	LDL	12	89921860	T	A	0.313822	0.0101	0.0014	12.2659	10.6331	0.05866	na	na	na	POC1B;GALNT4;ATP2B1	na	na	GALNT4	na	GALNT4;POC1B;GALNT4;RP11-734K2.4	na	na	na	na	na	GALNT4	na	POC1B	ATP2B1;RP11-734K2.4
rs4760388	LDL	12	92802078	C	T	0.552642	0.0093	0.0013	12.0738	8.56963	0.2443	na	CLLU1	na	CLLU1	na	BTG1	CLLU1OS	na	na	na	na	na	na	na	na	na	CLLU1	BTG1;CLLU1OS
rs1515563	TC	12	92819139	C	A	0.547528	0.0084	0.0012	11.5918	7.44376	0.4221	na	CLLU1	na	CLLU1	na	BTG1	CLLU1OS	na	na	na	na	na	na	na	na	na	CLLU1	BTG1;CLLU1OS
rs1536464	LDL	12	100836797	C	T	0.462569	-0.0117	0.0013	18.6464	17.602	0.0001141	na	NR1H4	na	UHRF1BP1L;SCYL2;NR1H4	SCYL2	NR1H4	SLC17A8	SLC17A8	na	NR1H4	NR1H4	SLC17A8	na	na	na	NR1H4	SLC17A8	SCYL2;UHRF1BP1L
rs1536464	nonHDL	12	100836797	C	T	0.455327	-0.0122	0.0015	15.3792	11.578	0.3207	na	na	na	NR1H4	na	NR1H4	SLC17A8	SLC17A8	na	NR1H4	NR1H4	SLC17A8	na	na	na	na	NR1H4;SLC17A8	na
rs1536464	TC	12	100836797	C	T	0.459915	-0.0119	0.0012	22.4531	16.6851	0.05269	na	na	na	SCYL2;NR1H4	SCYL2	NR1H4	SLC17A8	na	na	NR1H4	NR1H4	na	na	na	na	na	NR1H4	SCYL2;SLC17A8
rs10860738	HDL	12	101867997	G	A	0.351295	-0.0107	0.0013	15.7305	11.6206	0.06646	na	AC010205.1	AC010205.1	na	na	na	SPIC	SPIC	na	na	na	SPIC	na	na	na	na	SPIC	AC010205.1
rs4764883	LDL	12	102806305	C	T	0.314319	0.0108	0.0014	13.9148	11.9978	0.02631	na	na	na	CCDC53;PARPBP	CCDC53;PARPBP	IGF1	IGF1	IGF1;DRAM1	na	PMCH	IGF1	IGF1	na	na	na	IGF1	na	CCDC53;DRAM1;PARPBP
rs4764883	TC	12	102806305	C	T	0.319686	0.0087	0.0013	10.6582	7.72926	0.07741	na	LINC02456	na	CCDC53	CCDC53	IGF1	IGF1	IGF1;DRAM1	na	PMCH	IGF1	IGF1	na	na	na	IGF1	na	CCDC53;DRAM1;LINC02456
rs1196760	LDL	12	105606068	G	C	0.082064	0.0192	0.0024	14.9051	12.3145	0.3388	na	na	na	na	na	APPL2	APPL2	na	KIAA1033	na	APPL2	na	na	na	na	na	APPL2	KIAA1033
rs1196760	nonHDL	12	105606068	G	C	0.08496	0.0206	0.0028	12.7261	9.49949	0.5359	na	na	na	na	na	APPL2	APPL2	KIAA1033;APPL2	KIAA1033	na	APPL2	APPL2;KIAA1033	na	na	na	APPL2	KIAA1033	na
rs1196760	TC	12	105606068	G	C	0.082151	0.0185	0.0023	15.0589	12.0354	0.1497	na	na	na	na	na	na	APPL2	KIAA1033	KIAA1033	na	na	KIAA1033	na	na	na	na	KIAA1033	APPL2
rs4964188	HDL	12	107100717	C	T	0.533463	-0.0095	0.0013	12.5658	8.8865	0.7933	na	na	na	na	na	CKAP4	RP11-144F15.1	na	na	na	na	na	na	na	na	na	na	CKAP4;RP11-144F15.1
rs11113118	logTG	12	107199142	G	A	0.755073	-0.0163	0.0014	30.6029	22.7746	0.9421	na	na	na	TCP11L2;POLR3B;RIC8B;TMEM263;MTERF2;CRY1	RIC8B;TMEM263;CRY1	na	RIC8B	na	na	na	na	na	na	na	na	na	RIC8B	CRY1;MTERF2;POLR3B;TCP11L2;TMEM263
rs11114023	HDL	12	109057037	T	A	0.295423	-0.011	0.0014	14.4056	11.2157	0.6075	na	CORO1C	na	TMEM119;SELPLG;CORO1C;SSH1;DAO	CORO1C;SSH1	ACACB	CORO1C	SSH1	na	ACACB	na	SSH1	na	na	na	CORO1C	SSH1	ACACB;DAO;SELPLG;TMEM119
rs4964736	logTG	12	109100503	C	T	0.657138	-0.0091	0.0013	11.5918	8.7572	0.03872	na	na	na	TMEM119;SELPLG;CORO1C;SSH1;DAO;ACACB	CORO1C;SSH1	ACACB	CORO1C	SSH1	na	ACACB	ACACB	SSH1	na	na	na	na	ACACB;CORO1C;SSH1	DAO;SELPLG;TMEM119
rs4964275	TC	12	109152649	C	T	0.698832	-0.011	0.0013	16.5786	12.104	0.6671	na	na	na	TMEM119;SELPLG;CORO1C;SSH1;DAO;UNG;ACACB	CORO1C;SSH1	ACACB	SSH1	SSH1;CORO1C	na	ACACB	ACACB	SSH1;CORO1C	na	na	na	SSH1	ACACB;CORO1C	DAO;SELPLG;TMEM119;UNG
rs4964750	nonHDL	12	109156737	C	T	0.303746	0.0151	0.0016	20.4182	17.1539	0.3311	na	na	na	TMEM119;SELPLG;CORO1C;SSH1;DAO;ACACB	CORO1C;SSH1	ACACB	SSH1	CORO1C;SSH1	na	ACACB	ACACB	CORO1C;SSH1	na	na	na	SSH1	ACACB;CORO1C	DAO;SELPLG;TMEM119
rs4964756	LDL	12	109171697	T	A	0.685013	-0.013	0.0014	19.7942	17.0823	0.4924	na	na	na	TMEM119;SELPLG;CORO1C;SSH1;DAO	CORO1C;SSH1	ACACB	SSH1	CORO1C;SSH1	na	ACACB	na	CORO1C;SSH1	na	na	na	SSH1	CORO1C	ACACB;DAO;SELPLG;TMEM119
rs12316300	logTG	12	109709680	G	T	0.803593	0.0174	0.0016	26.8191	23.009	0.1534	na	na	na	SSH1;DAO;ACACB;FOXN4	SSH1;FOXN4	ACACB	ACACB	ACACB	ACACB	ACACB;UBE3B	ACACB	ACACB	na	ACACB	na	na	na	DAO;FOXN4;SSH1
rs10850141	nonHDL	12	109876128	C	T	0.692909	-0.0111	0.0016	11.3989	9.60003	0.01105	na	MMAB	na	ACACB;FOXN4;KCTD10;UBE3B;MMAB;MVK	FOXN4;KCTD10;MMAB	ACACB	MYO1H	MVK;MMAB;UBE3B;KCTD10	ACACB	ACACB;UBE3B	ACACB	MVK;MMAB;UBE3B;KCTD10	na	na	na	ACACB;MMAB	KCTD10;MVK;UBE3B	FOXN4;MYO1H
rs1543896	HDL	12	109920071	G	T	0.479673	-0.0286	0.0012	124.822	101.536	0.2426	na	na	na	UBE3B;MMAB	MMAB	ACACB	UBE3B	UBE3B;KCTD10;MMAB	UBE3B;KCTD10	ACACB;UBE3B	na	UBE3B;MMAB;KCTD10	na	na	UBE3B	na	KCTD10;MMAB	ACACB
rs7953014	TC	12	109998097	G	A	0.516759	0.0182	0.0012	51.2307	46.0239	0.001186	na	na	na	UNG;ACACB;FOXN4;MYO1H;LINC01486;KCTD10;UBE3B;MMAB;MVK	MYO1H;KCTD10;MMAB;MVK	ACACB	MMAB	MMAB;UBE3B;MVK;KCTD10	MMAB	ACACB;UBE3B	ACACB	MMAB;UBE3B;MVK;KCTD10	na	na	MMAB	na	ACACB;KCTD10;MVK;UBE3B	FOXN4;LINC01486;MYO1H;UNG
rs7134594	LDL	12	110000193	C	T	0.475025	-0.0076	0.0013	8.29837	8.14319	0.008621	na	na	na	UBE3B;MMAB	MMAB	ACACB	MMAB	MMAB;MVK;UBE3B	MMAB;UBE3B;KCTD10;ACACB	ACACB;UBE3B	ACACB	MMAB;UBE3B	na	na	MMAB	UBE3B	ACACB	KCTD10;MVK
rs75295329	HDL	12	111344621	G	T	0.982012	0.0651	0.0064	23.5771	27.3397	0.03471	na	ALDH2	na	LINC01405;RP1-46F2.3;CUX2;FAM109A;RP3-473L9.4;SH2B3	FAM109A;RP3-473L9.4;SH2B3	PPP1CC	CCDC63	na	HVCN1;SH2B3	PPP1CC	na	na	na	na	na	na	SH2B3	ALDH2;CCDC63;CUX2;FAM109A;HVCN1;LINC01405;PPP1CC;RP1-46F2.3;RP3-473L9.4
rs2339718	logTG	12	111702646	G	A	0.292291	-0.0109	0.0014	14.1591	12.3036	0.01288	na	na	na	CUX2;FAM109A;RP3-473L9.4;SH2B3;ATXN2;BRAP;ACAD10	FAM109A;RP3-473L9.4;SH2B3	ATXN2	CUX2	FAM109A	na	ATXN2	ATXN2	FAM109A	na	na	na	na	ATXN2;CUX2;FAM109A	ACAD10;BRAP;RP3-473L9.4;SH2B3
rs3184504	HDL	12	111884608	C	T	0.583252	0.0221	0.0013	64.0856	50.1563	0.9467	na	VPS29	na	LINC01405;RP1-46F2.3;CUX2;FAM109A;RP3-473L9.4;SH2B3;ATXN2;BRAP;ACAD10;ALDH2;MAPKAPK5-AS1;MAPKAPK5;TMEM116	FAM109A;RP3-473L9.4;SH2B3;ATXN2;ACAD10;ALDH2;MAPKAPK5-AS1;MAPKAPK5;TMEM116	ALDH2	SH2B3	SH2B3;ALDH2;ATXN2;PTPN11;ACAD10;TRAFD1;FAM109A;MAPKAPK5	SH2B3	ALDH2;ATXN2	ALDH2	SH2B3;ALDH2;ATXN2;ACAD10;FAM109A;MAPKAPK5	na	na	SH2B3	ALDH2	ACAD10;ATXN2;FAM109A;MAPKAPK5	BRAP;CUX2;LINC01405;MAPKAPK5-AS1;PTPN11;RP1-46F2.3;RP3-473L9.4;TMEM116;TRAFD1;VPS29
rs653178	LDL	12	112007756	C	T	0.417226	-0.0236	0.0013	72.9218	60.1918	0.3016	na	na	na	CUX2;FAM109A;RP3-473L9.4;SH2B3;ATXN2;BRAP;ACAD10;ALDH2;MAPKAPK5-AS1;MAPKAPK5;TMEM116;ERP29;NAA25	FAM109A;RP3-473L9.4;SH2B3;ATXN2;ACAD10;ALDH2;MAPKAPK5-AS1;MAPKAPK5;TMEM116;ERP29;NAA25	ALDH2	ATXN2	ACAD10;ALDH2;SH2B3;FAM109A;PTPN11;ATXN2	SH2B3	ALDH2;ATXN2	ALDH2	ACAD10;ALDH2;SH2B3;FAM109A;ATXN2	na	na	na	ALDH2;ATXN2;SH2B3	ACAD10;FAM109A	BRAP;CUX2;ERP29;MAPKAPK5;MAPKAPK5-AS1;NAA25;PTPN11;RP3-473L9.4;TMEM116
rs653178	nonHDL	12	112007756	C	T	0.420312	-0.0202	0.0016	35.8132	29.9703	0.3188	na	na	na	RP3-473L9.4;SH2B3;ATXN2;BRAP;ACAD10;ALDH2;MAPKAPK5-AS1;MAPKAPK5;TMEM116;ERP29;NAA25	RP3-473L9.4;SH2B3;ATXN2;ACAD10;ALDH2;MAPKAPK5-AS1;TMEM116;ERP29;NAA25	ALDH2	ATXN2	ACAD10;ALDH2;PTPN11;SH2B3;FAM109A;ATXN2;BRAP;NAA25;MAPKAPK5	SH2B3	ALDH2;ATXN2	ALDH2	ACAD10;ALDH2;SH2B3;ATXN2;BRAP;NAA25;MAPKAPK5	na	na	na	ALDH2;ATXN2;SH2B3	ACAD10;BRAP;MAPKAPK5;NAA25	ERP29;FAM109A;MAPKAPK5-AS1;PTPN11;RP3-473L9.4;TMEM116
rs653178	TC	12	112007756	C	T	0.41826	-0.0269	0.0013	94.3912	83.0245	0.2227	na	na	na	CUX2;FAM109A;RP3-473L9.4;SH2B3;ATXN2;BRAP;ACAD10;ALDH2;MAPKAPK5-AS1;MAPKAPK5;TMEM116;ERP29;NAA25	FAM109A;RP3-473L9.4;SH2B3;ATXN2;ACAD10;ALDH2;MAPKAPK5-AS1;MAPKAPK5;TMEM116;ERP29;NAA25	ALDH2	ATXN2	ACAD10;SH2B3;ALDH2;PTPN11;ATXN2;FAM109A;NAA25;BRAP;TRAFD1;MAPKAPK5	SH2B3	ALDH2;ATXN2	ALDH2	ACAD10;SH2B3;ALDH2;ATXN2;FAM109A;NAA25;BRAP;MAPKAPK5	na	na	na	ALDH2;ATXN2;SH2B3	ACAD10;BRAP;FAM109A;MAPKAPK5;NAA25	CUX2;ERP29;MAPKAPK5-AS1;PTPN11;RP3-473L9.4;TMEM116;TRAFD1
rs11066412	LDL	12	113218868	G	A	0.760762	0.0145	0.0016	18.8945	16.2163	0.2125	na	na	na	HECTD4;RPL6;PTPN11	HECTD4;RPL6;PTPN11	PTPN11	RPH3A	na	na	OAS1;PTPN11	PTPN11	na	na	na	na	na	PTPN11	HECTD4;RPH3A;RPL6
rs11066412	TC	12	113218868	G	A	0.768165	0.014	0.0015	19.9889	15.383	0.4248	na	na	na	HECTD4;RPL6;PTPN11	HECTD4;RPL6;PTPN11	PTPN11	RPH3A	na	OAS2	OAS1;PTPN11	PTPN11	na	na	na	na	na	PTPN11	HECTD4;OAS2;RPH3A;RPL6
rs2072134	HDL	12	113409176	G	A	0.980383	0.0636	0.0061	24.7254	19.842	0.3597	na	SLC8B1	na	PTPN11	PTPN11	PTPN11	OAS3	na	na	OAS1;PTPN11	PTPN11	na	na	na	na	na	PTPN11	OAS3;SLC8B1
rs2516079	TC	12	120859188	G	T	0.323266	0.0105	0.0013	15.1777	13.4133	0.001412	na	SPPL3	na	COX6A1;DYNLL1;CABP1;MLEC;RP11-173P15.10;UNC119B;ACADS;SPPL3	DYNLL1;RP11-173P15.10;UNC119B;ACADS;SPPL3	ACADS	COX6A1	na	na	ACADS;PLA2G1B;RNF10	ACADS	na	na	na	na	na	ACADS;COX6A1;SPPL3	CABP1;DYNLL1;MLEC;RP11-173P15.10;UNC119B
rs2393792	HDL	12	121406293	G	A	0.526613	0.0144	0.0012	32.4494	22.9432	0.7947	na	na	na	CABP1;MLEC;UNC119B;ACADS;SPPL3;HNF1A;C12orf43;OASL;CAMKK2	UNC119B;ACADS;SPPL3;HNF1A;C12orf43;OASL	MLEC	AC079602.1	OASL;HNF1A	na	ACADS;HNF1A;P2RX7;RNF10	MLEC	OASL;HNF1A	na	na	na	na	HNF1A;MLEC;OASL	AC079602.1;ACADS;C12orf43;CABP1;CAMKK2;SPPL3;UNC119B
rs1169288	LDL	12	121416650	C	A	0.31789	0.0344	0.0014	132.593	129.227	0.06977	na	na	na	CABP1;MLEC;UNC119B;ACADS;SPPL3;HNF1A;C12orf43;OASL;CAMKK2	UNC119B;ACADS;SPPL3;HNF1A;C12orf43;OASL	HNF1A	HNF1A	HNF1A	HNF1A-AS1;HNF1A	ACADS;HNF1A;P2RX7;RNF10	HNF1A	HNF1A	na	HNF1A	na	na	na	ACADS;C12orf43;CABP1;CAMKK2;HNF1A-AS1;MLEC;OASL;SPPL3;UNC119B
rs1169288	TC	12	121416650	C	A	0.318063	0.0346	0.0013	155.346	135.595	0.07228	na	na	na	DYNLL1;CABP1;MLEC;RP11-173P15.10;UNC119B;ACADS;SPPL3;HNF1A;C12orf43;OASL;CAMKK2	DYNLL1;RP11-173P15.10;UNC119B;ACADS;SPPL3;HNF1A;C12orf43;OASL	HNF1A	HNF1A	HNF1A	HNF1A-AS1;HNF1A	ACADS;HNF1A;P2RX7;RNF10	HNF1A	HNF1A	na	HNF1A	na	na	na	ACADS;C12orf43;CABP1;CAMKK2;DYNLL1;HNF1A-AS1;MLEC;OASL;RP11-173P15.10;SPPL3;UNC119B
rs2244608	nonHDL	12	121416988	G	A	0.336079	0.0304	0.0016	79.7682	74.8474	0.3774	na	na	na	CABP1;MLEC;UNC119B;ACADS;SPPL3;HNF1A;C12orf43;OASL	UNC119B;SPPL3;HNF1A;C12orf43;OASL	HNF1A	HNF1A	HNF1A	HNF1A-AS1;HNF1A	ACADS;HNF1A;P2RX7;RNF10	HNF1A	HNF1A	na	HNF1A	na	na	na	ACADS;C12orf43;CABP1;HNF1A-AS1;MLEC;OASL;SPPL3;UNC119B
rs1667583	TC	12	122370206	C	T	0.869292	-0.0114	0.0018	9.61993	7.46635	0.08921	na	na	na	HPD;PSMD9;WDR66;BCL7A	HPD;PSMD9;WDR66	MLXIP	WDR66	HPD;BCL7A	RP11-87C12.2;PSMD9;HPD;RP11-7M8.2;SETD1B;DIABLO;B3GNT4;LRRC43;RP11-512M8.5;MLXIP	MLXIP	MLXIP	HPD;BCL7A	na	na	na	HPD	BCL7A;MLXIP;PSMD9;WDR66	B3GNT4;DIABLO;LRRC43;RP11-512M8.5;RP11-7M8.2;RP11-87C12.2;SETD1B
rs2247139	LDL	12	122380274	G	A	0.867483	-0.012	0.0018	10.5822	7.55062	0.1613	na	na	na	HPD;PSMD9;WDR66;BCL7A	HPD;PSMD9;WDR66	TMEM120B	WDR66	HPD	RP11-87C12.2;PSMD9;HPD;RP11-7M8.2	MLXIP	na	HPD	na	na	na	HPD	PSMD9;WDR66	BCL7A;RP11-7M8.2;RP11-87C12.2;TMEM120B
rs189392453	HDL	12	122381427	C	A	0.939565	0.0182	0.003	8.88408	8.28003	0.02281	na	na	na	HPD;PSMD9;WDR66;BCL7A	HPD;PSMD9;WDR66	MLXIP	WDR66	SETD1B;HPD;BCL7A;RHOF	na	MLXIP	na	HPD;BCL7A	na	na	na	na	BCL7A;HPD;WDR66	MLXIP;PSMD9;RHOF;SETD1B
rs12369179	HDL	12	122963550	C	T	0.923315	0.0298	0.0024	34.6732	30.6223	0.002046	na	HCAR3;RHOF	HCAR3	BCL7A;ABCB9;OGFOD2	na	MLXIP	ZCCHC8	RSRC2;ZCCHC8;CLIP1	na	HCAR1;HCAR2;HCAR3;MLXIP	na	ZCCHC8	na	na	na	na	ZCCHC8	ABCB9;BCL7A;CLIP1;HCAR3;MLXIP;OGFOD2;RHOF;RSRC2
rs488635	logTG	12	123203258	G	T	0.234169	-0.0145	0.0015	21.3791	18.3481	0.02551	na	RHOF;HCAR3	HCAR3	RP11-324E6.6;HCAR2;HCAR3;HCAR1;ABCB9;OGFOD2;ARL6IP4;PITPNM2;MPHOSPH9	HCAR2;HCAR3;ABCB9;OGFOD2;ARL6IP4;PITPNM2;MPHOSPH9	PITPNM2	HCAR1	HCAR1	na	HCAR1;HCAR2;HCAR3	PITPNM2	HCAR1	na	na	na	HCAR1	HCAR3;PITPNM2	ABCB9;ARL6IP4;HCAR2;MPHOSPH9;OGFOD2;RHOF;RP11-324E6.6
rs12366872	HDL	12	123804721	G	C	0.886327	-0.0419	0.0019	107.045	86.6196	0.2238	na	na	na	ABCB9;OGFOD2;PITPNM2;C12orf65;CDK2AP1;SBNO1;RP13-942N8.1;SETD8;DNAH10	C12orf65;CDK2AP1;RP13-942N8.1;SETD8	ARL6IP4	SBNO1	SETD8;SBNO1	RP11-282O18.7;CDK2AP1;MPHOSPH9	na	na	SETD8;SBNO1	na	na	na	SBNO1	CDK2AP1;SETD8	ABCB9;ARL6IP4;C12orf65;DNAH10;MPHOSPH9;OGFOD2;PITPNM2;RP11-282O18.7;RP13-942N8.1
rs7312145	nonHDL	12	123825339	G	A	0.881626	-0.0171	0.0023	12.9799	9.4762	0.3567	na	na	na	CDK2AP1;SBNO1;SETD8;TMED2;TCTN2;ATP6V0A2;DNAH10	CDK2AP1;SETD8;TCTN2;DNAH10	HIP1R	SBNO1	SETD8;SBNO1	RP11-282O18.7;CDK2AP1;DNAH10	na	na	SETD8;SBNO1	na	na	na	SBNO1	CDK2AP1;DNAH10;SETD8	ATP6V0A2;HIP1R;RP11-282O18.7;TCTN2;TMED2
rs7312145	TC	12	123825339	G	A	0.884117	-0.0308	0.0019	58.3717	51.0715	0.1816	na	CDK2AP1	CDK2AP1	HIP1R;VPS37B;ABCB9;OGFOD2;ARL6IP4;PITPNM2;MPHOSPH9;C12orf65;CDK2AP1;SBNO1;RP13-942N8.1;SETD8;TMED2	HIP1R;VPS37B;ABCB9;OGFOD2;ARL6IP4;C12orf65;CDK2AP1;SBNO1;RP13-942N8.1;SETD8	HIP1R	SBNO1	SETD8;SBNO1	RP11-282O18.7;CDK2AP1	na	HIP1R	SETD8;SBNO1	na	na	na	CDK2AP1;SBNO1	HIP1R;SETD8	ABCB9;ARL6IP4;C12orf65;MPHOSPH9;OGFOD2;PITPNM2;RP11-282O18.7;RP13-942N8.1;TMED2;VPS37B
rs28461471	LDL	12	123856974	G	A	0.112829	0.021	0.0021	22.817	17.3232	0.8954	na	na	na	ABCB9;OGFOD2;PITPNM2;C12orf65;CDK2AP1;SBNO1;RP13-942N8.1;SETD8;TMED2;DNAH10	C12orf65;CDK2AP1;RP13-942N8.1;SETD8	ARL6IP4	SBNO1	SETD8;SBNO1	na	na	na	SETD8;SBNO1	na	na	na	SBNO1	SETD8	ABCB9;ARL6IP4;C12orf65;CDK2AP1;DNAH10;OGFOD2;PITPNM2;RP13-942N8.1;TMED2
rs28577594	logTG	12	123895906	G	C	0.326437	-0.0089	0.0014	9.6871	9.49863	0.0004917	na	na	na	ABCB9;OGFOD2;ARL6IP4;PITPNM2;MPHOSPH9;C12orf65;CDK2AP1;SBNO1;SETD8;RILPL1;TMED2;DDX55;EIF2B1;GTF2H3;TCTN2;ATP6V0A2;DNAH10	ABCB9;OGFOD2;ARL6IP4;PITPNM2;MPHOSPH9;C12orf65;CDK2AP1;TMED2;TCTN2;ATP6V0A2;DNAH10	PITPNM2	SETD8	SETD8;SBNO1;PITPNM2	na	na	PITPNM2	SETD8;SBNO1;PITPNM2	na	na	na	PITPNM2;SETD8	SBNO1	ABCB9;ARL6IP4;ATP6V0A2;C12orf65;CDK2AP1;DDX55;DNAH10;EIF2B1;GTF2H3;MPHOSPH9;OGFOD2;RILPL1;TCTN2;TMED2
rs7133378	HDL	12	124409502	G	A	0.678959	-0.0298	0.0013	115.563	100.166	1.5e-07	na	DNAH10OS;DNAH10	na	DNAH10;CCDC92;DNAH10OS;ZNF664;FAM101A;RP11-214K3.24	CCDC92;DNAH10OS;ZNF664;FAM101A	NCOR2	DNAH10	na	na	ZNF664	na	na	na	na	na	DNAH10	DNAH10OS	CCDC92;FAM101A;NCOR2;RP11-214K3.24;ZNF664
rs7133378	nonHDL	12	124409502	G	A	0.692269	0.0167	0.0016	24.7769	20.1999	0.2939	na	na	na	TMED2;TCTN2;ATP6V0A2;DNAH10;CCDC92;DNAH10OS;ZNF664;FAM101A;RP11-214K3.24	TCTN2;DNAH10;CCDC92;DNAH10OS;ZNF664;FAM101A	NCOR2	DNAH10	ZNF664	DNAH10;DNAH10OS;RP11-380L11.3;CCDC92	ZNF664	na	ZNF664	na	na	na	DNAH10	CCDC92;DNAH10OS;ZNF664	ATP6V0A2;FAM101A;NCOR2;RP11-214K3.24;RP11-380L11.3;TCTN2;TMED2
rs12303671	logTG	12	124492610	G	T	0.333479	-0.0227	0.0013	67.5509	61.518	1.85e-08	na	na	na	RILPL1;TMED2;DDX55;EIF2B1;GTF2H3;TCTN2;ATP6V0A2;DNAH10;CCDC92;DNAH10OS;ZNF664;FAM101A;RP11-214K3.24	TMED2;TCTN2;ATP6V0A2;DNAH10;CCDC92;DNAH10OS;ZNF664;FAM101A	NCOR2	ZNF664	na	DNAH10;DNAH10OS;RP11-380L11.3;CCDC92	ZNF664	na	na	na	na	na	na	CCDC92;DNAH10;DNAH10OS;ZNF664	ATP6V0A2;DDX55;EIF2B1;FAM101A;GTF2H3;NCOR2;RILPL1;RP11-214K3.24;RP11-380L11.3;TCTN2;TMED2
rs1716393	LDL	12	124560456	G	T	0.410263	-0.0087	0.0013	10.6582	10.6275	0.004315	na	na	na	TMED2;DNAH10;CCDC92;DNAH10OS;ZNF664;FAM101A;RP11-214K3.24	CCDC92;DNAH10OS;ZNF664;FAM101A	NCOR2	FAM101A	na	na	ZNF664	na	na	na	na	na	na	FAM101A	CCDC92;DNAH10;DNAH10OS;NCOR2;RP11-214K3.24;TMED2;ZNF664
rs921919	TC	12	125265201	G	A	0.392546	0.0187	0.0013	46.1895	35.4992	0.7719	SCARB1	na	na	NCOR2;SCARB1	SCARB1	UBC	SCARB1	SCARB1	SCARB1	SCARB1;TMEM132B	na	SCARB1	na	na	SCARB1	na	na	NCOR2;UBC
rs10846744	LDL	12	125312425	G	C	0.79403	-0.0203	0.0017	32.1415	29.6274	0.007074	SCARB1	SCARB1	na	na	na	UBC	SCARB1	SCARB1	na	SCARB1;TMEM132B	na	SCARB1	na	na	na	SCARB1	na	UBC
rs10846744	logTG	12	125312425	G	C	0.793709	-0.0186	0.0017	27.1352	23.6599	0.1844	SCARB1	SCARB1	na	SCARB1	SCARB1	UBC	SCARB1	SCARB1	na	SCARB1;TMEM132B	na	SCARB1	na	na	SCARB1	na	na	UBC
rs10846744	nonHDL	12	125312425	G	C	0.795635	-0.0279	0.002	43.5022	38.9433	0.1077	SCARB1	SCARB1	na	SCARB1	na	UBC	SCARB1	SCARB1	na	SCARB1;TMEM132B	na	SCARB1	na	na	SCARB1	na	na	UBC
rs61941677	HDL	12	125325010	G	C	0.117599	-0.0591	0.002	191.183	172.174	2.33e-06	SCARB1	SCARB1	SCARB1	na	na	UBC	SCARB1	SCARB1	SCARB1	SCARB1;TMEM132B	na	SCARB1	na	na	SCARB1	na	na	UBC
rs73486469	LDL	12	133065832	G	A	0.129821	0.0158	0.002	14.5545	13.0734	0.07956	na	FBRSL1;AC131212.2;AC131212.3	na	FBRSL1;GOLGA3	FBRSL1	FBRSL1	FBRSL1	na	na	na	FBRSL1	na	na	na	FBRSL1	na	na	AC131212.2;AC131212.3;GOLGA3
rs73486469	TC	12	133065832	G	A	0.124896	0.0183	0.0019	21.2305	18.2813	0.0385	na	FBRSL1;AC131212.3;AC131212.2	na	FBRSL1;GOLGA3	FBRSL1	FBRSL1	FBRSL1	na	na	na	FBRSL1	na	na	na	FBRSL1	na	na	AC131212.2;AC131212.3;GOLGA3
rs78644250	nonHDL	12	133140329	G	C	0.165475	0.0204	0.0025	15.4749	13.1679	0.3533	na	AC131212.2;FBRSL1;AC131212.3	FBRSL1	FBRSL1	FBRSL1	GOLGA3	FBRSL1	na	na	na	na	na	na	na	na	FBRSL1	na	AC131212.2;AC131212.3;GOLGA3
rs2737700	logTG	13	23908034	G	A	0.424591	-0.0109	0.0013	16.2934	13.9976	0.02978	na	SACS	na	SACS	na	na	SACS	SGCG	na	na	na	na	na	na	na	SACS	na	SGCG
rs76428106	TC	13	28604007	C	T	0.0123081	-0.0531	0.0065	15.5081	11.3233	0.8304	na	na	na	FLT3	na	PAN3	FLT3	PAN3	na	na	na	na	na	na	na	na	FLT3;PAN3	na
rs4397962	HDL	13	28687084	C	T	0.262909	-0.0125	0.0014	18.365	14.4933	0.009351	na	na	na	ATP5EP2;FLT3	ATP5EP2	FLT1	FLT3	na	na	na	na	na	na	na	na	na	FLT3	ATP5EP2;FLT1
rs1340819	logTG	13	29145323	C	A	0.324327	-0.0094	0.0013	12.3185	10.065	0.01024	na	na	na	na	na	FLT1	FLT1	FLT1	na	na	FLT1	FLT1	na	na	na	FLT1	na	na
rs398098735	logTG	13	31001091	AT	A	0.626776	0.0111	0.0014	14.6543	12.9218	0.03379	na	UBE2L5;LINC01058	na	LINC01058;UBE2L5P;HMGB1	LINC01058;UBE2L5P	na	HMGB1	na	na	ALOX5AP	na	na	na	na	na	na	HMGB1;LINC01058	UBE2L5;UBE2L5P
rs4769036	TC	13	31005142	C	T	0.614805	0.0087	0.0012	12.3801	9.56939	0.1098	na	LINC01058;UBE2L5	na	LINC00426;LINC01058;UBE2L5P	LINC01058	na	HMGB1	na	na	ALOX5AP	na	na	na	na	na	na	LINC01058	HMGB1;LINC00426;UBE2L5;UBE2L5P
rs5026917	nonHDL	13	31010795	C	A	0.388239	-0.013	0.0015	17.3517	12.0864	0.9278	na	UBE2L5	na	LINC01058;UBE2L5P;HMGB1	LINC01058;UBE2L5P	na	HMGB1	na	na	ALOX5AP	na	na	na	na	na	na	HMGB1	LINC01058;UBE2L5;UBE2L5P
rs12868611	TC	13	32444439	C	T	0.326283	-0.0097	0.0013	13.0679	10.3387	0.1926	na	na	na	BRCA2	BRCA2	BRCA2	RXFP2	na	na	RXFP2	BRCA2	na	na	na	na	na	BRCA2	RXFP2
rs7997102	LDL	13	32445660	C	T	0.322023	-0.0096	0.0013	12.8156	9.48836	0.07665	na	na	na	BRCA2	BRCA2	na	RXFP2	na	na	RXFP2	na	na	na	na	na	na	na	BRCA2;RXFP2
rs368213791	LDL	13	32976656	GC	G	0.529809	0.0244	0.0014	67.3003	61.6939	0.02854	na	na	na	BRCA2;N4BP2L1;N4BP2L2;PDS5B;RP11-380B4.3	BRCA2;N4BP2L1;N4BP2L2;PDS5B;RP11-380B4.3	na	N4BP2L1	na	na	na	na	na	na	na	na	na	N4BP2L1	BRCA2;N4BP2L2;PDS5B;RP11-380B4.3
rs368213791	nonHDL	13	32976656	GC	G	0.525001	0.026	0.0016	58.651	51.468	0.04475	na	na	na	ZAR1L;BRCA2;N4BP2L1;N4BP2L2;PDS5B;RP11-380B4.3	BRCA2;N4BP2L1;N4BP2L2	BRCA2	N4BP2L1	na	na	na	BRCA2	na	na	na	na	na	BRCA2;N4BP2L1	N4BP2L2;PDS5B;RP11-380B4.3;ZAR1L
rs368213791	TC	13	32976656	GC	G	0.529056	0.0208	0.0013	56.8936	47.8222	0.06088	na	na	na	BRCA2;N4BP2L1;N4BP2L2;PDS5B;RP11-380B4.3	BRCA2;N4BP2L1;N4BP2L2;PDS5B;RP11-380B4.3	BRCA2	N4BP2L1	na	na	na	BRCA2	na	na	na	na	na	BRCA2;N4BP2L1	N4BP2L2;PDS5B;RP11-380B4.3
rs17532371	HDL	13	41635301	G	C	0.0652393	-0.0239	0.0026	19.4151	16.3358	0.05624	na	WBP4	WBP4	SLC25A15;ELF1;WBP4	ELF1;WBP4	FOXO1	ELF1	ELF1	na	FOXO1	na	ELF1	na	na	na	ELF1	WBP4	FOXO1;SLC25A15
rs17532371	LDL	13	41635301	G	C	0.0655259	-0.0199	0.0026	13.7098	10.1393	0.319	na	WBP4	WBP4	SLC25A15;ELF1;WBP4	ELF1;WBP4	na	ELF1	ELF1	na	FOXO1	na	ELF1	na	na	na	ELF1	WBP4	SLC25A15
rs17532371	TC	13	41635301	G	C	0.0655735	-0.0276	0.0025	27.6108	21.6296	0.4994	na	WBP4	WBP4	SLC25A15;ELF1;WBP4	ELF1;WBP4	FOXO1	ELF1	ELF1	na	FOXO1	na	ELF1	na	na	na	ELF1	WBP4	FOXO1;SLC25A15
rs73179655	HDL	13	45492138	G	T	0.970592	-0.0252	0.0039	9.98446	8.15506	0.01655	na	NUFIP1	na	na	na	TSC22D1	NUFIP1	NUFIP1	na	na	na	NUFIP1	na	na	na	NUFIP1	na	TSC22D1
rs138358301	logTG	13	45970147	G	A	0.00445083	0.0686	0.0102	10.757	7.84188	0.7426	na	na	na	na	na	na	SLC25A30	na	RCN1P2;SLC25A30;TPT1-AS1	na	na	na	na	na	na	na	SLC25A30	RCN1P2;TPT1-AS1
rs11386165	TC	13	50048401	C	CA	0.875062	-0.013	0.002	10.0952	9.81171	0.008286	na	na	na	CAB39L;SETDB2;PHF11	PHF11	FNDC3A	SETDB2	na	na	PHF11	na	na	na	na	na	na	SETDB2	CAB39L;FNDC3A;PHF11
rs9535255	LDL	13	50104386	G	A	0.510543	-0.0083	0.0013	9.7649	8.35066	0.0493	na	na	na	SETDB2;PHF11	PHF11	na	PHF11	na	CDADC1	PHF11;TRIM13	na	na	na	na	na	na	PHF11	CDADC1;SETDB2
rs41284816	logTG	13	50655989	G	T	0.980004	0.0502	0.0048	24.8723	19.6717	0.7939	na	na	na	EBPL;TRIM13;DLEU1	EBPL;DLEU1	na	DLEU1	DLEU1	na	TRIM13	na	na	na	na	na	DLEU1	na	EBPL;TRIM13
rs41284816	nonHDL	13	50655989	G	T	0.979601	0.0431	0.0057	13.3993	10.8308	0.4882	na	na	na	DLEU1	DLEU1	na	DLEU1	KPNA3;EBPL;KPNA3-IT1	na	TRIM13	na	na	na	na	na	na	DLEU1	EBPL;KPNA3;KPNA3-IT1
rs2812208	HDL	13	50707087	G	C	0.978753	-0.032	0.0046	11.4575	7.67985	0.3695	na	na	na	DLEU1	DLEU1	na	DLEU1	DLEU1;KPNA3	na	TRIM13	na	na	na	na	na	DLEU1	na	KPNA3
rs1239707	TC	13	51151633	G	A	0.404129	-0.0089	0.0012	12.9204	9.20608	0.156	na	na	na	DLEU1	DLEU1	na	DLEU1	na	na	na	na	na	na	na	na	na	DLEU1	na
rs558003	logTG	13	51172963	G	A	0.894776	0.0165	0.0021	14.4056	11.1189	0.1861	na	na	na	DLEU1	DLEU1	na	DLEU1	DLEU1	na	na	na	na	na	na	na	DLEU1	na	na
rs797482	HDL	13	51214613	G	A	0.873196	-0.0167	0.0018	19.7618	14.6149	0.3251	na	EBPL	na	DLEU1	DLEU1	na	DLEU1	DLEU1;KPNA3	na	na	na	na	na	na	na	DLEU1	na	EBPL;KPNA3
rs12428841	HDL	13	58391491	C	T	0.256691	-0.0101	0.0014	12.2659	8.98663	0.315	na	na	na	na	na	na	PCDH17	na	na	na	na	na	na	na	na	na	na	PCDH17
rs4885160	LDL	13	74748606	G	A	0.495138	-0.0097	0.0013	13.0679	9.02468	0.3664	na	na	na	na	na	na	KLF12	na	na	KLF12	na	na	na	na	na	na	na	KLF12
rs4885160	nonHDL	13	74748606	G	A	0.469151	-0.0109	0.0015	12.4336	7.9129	0.9013	na	na	na	na	na	na	KLF12	na	na	KLF12	na	na	na	na	na	na	na	KLF12
rs4885160	TC	13	74748606	G	A	0.486393	-0.0119	0.0013	19.2601	15.7021	0.2131	na	na	na	na	na	na	KLF12	na	na	KLF12	na	na	na	na	na	na	na	KLF12
rs7322453	LDL	13	95226210	G	C	0.730562	-0.0134	0.0015	18.3837	14.6637	0.3292	na	SOX21;TGDS	TGDS	TGDS;GPR180;SOX21	TGDS	na	TGDS	na	na	ABCC4	na	na	na	na	na	TGDS	SOX21	GPR180
rs6492721	logTG	13	95258944	C	T	0.651395	-0.018	0.0013	42.8722	34.9231	0.165	na	TGDS;GPR180	GPR180	DCT;TGDS;GPR180;SOX21	DCT;TGDS;GPR180	GPC6	GPR180	na	na	ABCC4	na	na	na	na	na	GPR180	TGDS	DCT;GPC6;SOX21
rs200748895	HDL	13	108960380	TGCTG	T	0.979017	0.0435	0.0053	15.6464	11.6717	0.5164	na	na	na	na	na	na	TNFSF13B	na	na	ABHD13	na	na	na	na	na	na	na	TNFSF13B
rs754205	TC	13	110411642	C	A	0.404058	0.0079	0.0012	10.3372	7.50704	0.1383	na	na	na	COL4A1	COL4A1	na	IRS2	na	COL4A1;LINC00396;IRS2	IRS2	na	na	na	na	na	na	COL4A1;IRS2	LINC00396
rs9521732	nonHDL	13	111033821	C	A	0.604376	0.0161	0.0015	26.1488	20.8282	0.241	na	na	na	na	na	COL4A2	COL4A2	na	na	na	COL4A2	na	na	na	na	na	COL4A2	na
rs9521732	TC	13	111033821	C	A	0.601877	0.0142	0.0012	31.5809	24.6164	0.1169	na	na	na	COL4A1;COL4A2	COL4A1;COL4A2	RAB20	COL4A2	na	na	na	na	na	na	na	na	na	COL4A2	COL4A1;RAB20
rs75345389	logTG	13	111038379	C	T	0.256728	-0.0101	0.0015	10.7804	7.70342	0.3991	na	na	na	na	na	ING1	COL4A2	na	na	na	na	na	na	na	na	na	na	COL4A2;ING1
rs4771674	LDL	13	111039070	G	A	0.596365	0.0151	0.0013	30.4631	25.7005	0.02646	na	na	na	COL4A1;COL4A2	COL4A1;COL4A2	COL4A2	COL4A2	na	na	na	COL4A2	na	na	na	na	COL4A2	na	COL4A1
rs9604045	HDL	13	113927208	G	T	0.721993	-0.0163	0.0017	21.0477	17.2593	0.6205	na	LAMP1	na	ATP4B;GRK1	na	CUL4A	CUL4A	LAMP1	na	ATP11A	CUL4A	LAMP1	na	na	na	na	CUL4A;LAMP1	ATP4B;GRK1
rs9604045	TC	13	113927208	G	T	0.723184	-0.0138	0.0016	17.1932	12.6535	0.3641	na	LAMP1;TMEM255B;GAS6-AS1	na	LAMP1;TFDP1;ATP4B;GRK1	LAMP1	F10	CUL4A	LAMP1	na	ATP11A	na	LAMP1	na	na	na	LAMP1	na	ATP4B;CUL4A;F10;GAS6-AS1;GRK1;TFDP1;TMEM255B
rs6602909	LDL	13	114551993	C	T	0.357487	0.0216	0.0014	52.9781	48.7947	0.1922	na	GAS6-AS1;GAS6	GAS6	ATP4B;GRK1;TMEM255B;GAS6;GAS6-AS2;LINC00452;LINC00565;RASA3	TMEM255B;GAS6;GAS6-AS2;LINC00452;LINC00565	GAS6	GAS6	na	na	RASA3	GAS6	na	na	na	GAS6	na	na	ATP4B;GAS6-AS1;GAS6-AS2;GRK1;LINC00452;LINC00565;RASA3;TMEM255B
rs6602909	logTG	13	114551993	C	T	0.357397	0.0256	0.0013	85.6003	70.7768	0.2811	na	GAS6-AS1;GAS6	GAS6	DCUN1D2;TMCO3;TFDP1;ATP4B;GRK1;TMEM255B;GAS6;GAS6-AS2;LINC00452;LINC00565;RASA3	TMEM255B;GAS6;GAS6-AS2;LINC00452;LINC00565;RASA3	DCUN1D2	GAS6	GAS6	GAS6	RASA3	DCUN1D2	GAS6	na	GAS6	na	na	DCUN1D2	ATP4B;GAS6-AS1;GAS6-AS2;GRK1;LINC00452;LINC00565;RASA3;TFDP1;TMCO3;TMEM255B
rs6602909	nonHDL	13	114551993	C	T	0.342403	0.0296	0.0016	75.6851	65.919	0.3872	na	GAS6;GAS6-AS1	GAS6	TFDP1;ATP4B;GRK1;TMEM255B;GAS6;GAS6-AS2;LINC00452;LINC00565;RASA3	TMEM255B;GAS6;GAS6-AS2;LINC00452;LINC00565	GAS6	GAS6	na	na	RASA3	GAS6	na	na	na	GAS6	na	na	ATP4B;GAS6-AS1;GAS6-AS2;GRK1;LINC00452;LINC00565;RASA3;TFDP1;TMEM255B
rs6602909	TC	13	114551993	C	T	0.354988	0.0264	0.0013	90.9588	80.424	0.8275	na	GAS6-AS1;GAS6	GAS6	TFDP1;ATP4B;GRK1;TMEM255B;GAS6;GAS6-AS2;LINC00452;LINC00565;RASA3	TMEM255B;GAS6;GAS6-AS2;LINC00452;LINC00565	GAS6	GAS6	na	na	RASA3	GAS6	na	na	na	GAS6	na	na	ATP4B;GAS6-AS1;GAS6-AS2;GRK1;LINC00452;LINC00565;RASA3;TFDP1;TMEM255B
rs1998848	LDL	14	21492229	G	A	0.984014	0.0375	0.0053	11.827	7.85178	0.5424	na	na	na	na	na	ANG	NDRG2	na	TPPP2;NDRG2;AL161668.5;SALL2;AE000658.22;SNORD8;SNORD9;CHD8;ARHGEF40;OR5AU1;TOX4;RAB2B	CHD8	na	na	na	na	na	na	NDRG2	AE000658.22;AL161668.5;ANG;ARHGEF40;CHD8;OR5AU1;RAB2B;SALL2;SNORD8;SNORD9;TOX4;TPPP2
rs1998848	TC	14	21492229	G	A	0.980528	0.0364	0.0046	14.6	10.1428	0.3857	na	na	na	na	na	CHD8	NDRG2	na	ZNF219	CHD8	na	na	na	na	na	na	na	CHD8;NDRG2;ZNF219
rs34210072	logTG	14	23685442	G	A	0.822144	0.0107	0.0017	9.50983	8.73137	0.004554	na	HOMEZ;PCK2	PCK2	HOMEZ	HOMEZ	PABPN1	C14orf164	na	na	DHRS2	na	na	na	na	na	na	HOMEZ	C14orf164;PABPN1;PCK2
rs79873985	logTG	14	24560159	G	A	0.0142712	-0.0371	0.0058	9.79881	7.84487	0.9993	na	na	na	PCK2	PCK2	PCK2	NRL	DCAF11;PCK2;CIDEB;DHRS1;TGM1;TSSK4;ADCY4;LTB4R	NRL;PCK2;LRRC16B;FITM1	CIDEB;DCAF11;DHRS2;NFATC4	PCK2	PCK2	na	na	PCK2	na	NRL	ADCY4;CIDEB;DCAF11;DHRS1;FITM1;LRRC16B;LTB4R;TGM1;TSSK4
rs11621792	LDL	14	24871926	C	T	0.596708	-0.0224	0.0013	65.8067	54.2505	0.03818	na	NYNRIN	NYNRIN	RABGGTA;LTB4R;ADCY4;NFATC4;NYNRIN;CBLN3;KHNYN	NFATC4;NYNRIN;CBLN3;KHNYN	PCK2	NYNRIN	na	ADCY4	CIDEB;DCAF11;NFATC4	na	na	na	na	na	NYNRIN	ADCY4	CBLN3;KHNYN;LTB4R;NFATC4;PCK2;RABGGTA
rs11621792	TC	14	24871926	C	T	0.608795	-0.0213	0.0013	59.6085	51.9679	0.02066	na	NYNRIN	NYNRIN	RNF31;IRF9;REC8;IPO4;TSSK4;CHMP4A;MDP1;RABGGTA;DHRS1;NOP9;LTB4R2;LTB4R;ADCY4;RIPK3;NFATC4;NYNRIN;CBLN3;KHNYN	RNF31;IRF9;CHMP4A;DHRS1;NOP9;LTB4R;ADCY4;RIPK3;NFATC4;NYNRIN;CBLN3;KHNYN	PCK2	NYNRIN	na	na	CIDEB;DCAF11;NFATC4	na	na	na	na	na	NYNRIN	na	ADCY4;CBLN3;CHMP4A;DHRS1;IPO4;IRF9;KHNYN;LTB4R;LTB4R2;MDP1;NFATC4;NOP9;PCK2;RABGGTA;REC8;RIPK3;RNF31;TSSK4
rs6573778	nonHDL	14	24872209	C	T	0.57107	-0.0228	0.0016	45.3484	40.5895	0.1955	na	NYNRIN	NYNRIN	ADCY4;NFATC4;NYNRIN;CBLN3;KHNYN	NFATC4;NYNRIN;CBLN3	IPO4	NYNRIN	NYNRIN	ADCY4	CIDEB;DCAF11;NFATC4	na	NYNRIN	na	na	NYNRIN	na	ADCY4	CBLN3;IPO4;KHNYN;NFATC4
rs139262716	nonHDL	14	31725111	G	A	0.96556	0.0369	0.0041	18.6464	15.272	0.1901	na	na	na	HEATR5A	na	HECTD1	HEATR5A	na	na	NUBPL	na	na	na	na	na	na	HEATR5A	HECTD1
rs138804630	TC	14	31727404	GT	G	0.0372	-0.0314	0.0035	18.5336	14.4523	0.06523	na	na	na	na	na	HECTD1	HEATR5A	na	na	NUBPL	na	na	na	na	na	na	na	HEATR5A;HECTD1
rs11845699	LDL	14	31735087	G	T	0.940826	0.0196	0.0029	10.856	12.1012	1.43e-05	na	na	na	na	na	HECTD1	HEATR5A	na	na	NUBPL	na	na	na	na	na	na	na	HEATR5A;HECTD1
rs1955512	HDL	14	33175822	G	A	0.411459	-0.0096	0.0013	12.8156	8.80878	0.6792	na	na	na	na	na	na	AKAP6	na	na	na	na	na	na	na	na	na	na	AKAP6
rs11846704	LDL	14	35186694	C	T	0.679541	0.0112	0.0014	14.9051	13.5603	0.004674	na	na	na	CFL2	CFL2	na	CFL2	na	na	na	na	na	na	na	na	na	CFL2	na
rs11846704	nonHDL	14	35186694	C	T	0.661468	0.0117	0.0017	11.2301	9.12329	0.2161	na	na	na	CFL2	CFL2	SNX6	CFL2	na	na	na	na	na	na	na	na	na	CFL2	SNX6
rs11846704	TC	14	35186694	C	T	0.661788	0.0094	0.0013	12.3185	10.8713	0.003594	na	na	na	CFL2	CFL2	na	CFL2	na	EGLN3	na	na	na	na	na	na	na	CFL2	EGLN3
rs1168548	logTG	14	38848824	T	A	0.66705	0.0068	0.0014	5.92412	9.38782	2.83e-07	na	na	na	na	na	na	CLEC14A	na	na	SSTR1	na	na	na	na	na	na	na	CLEC14A
rs62000665	TC	14	39766074	C	T	0.806108	-0.0117	0.0015	14.2083	11.0812	0.3439	na	na	na	MIA2;FBXO33	MIA2;FBXO33	PNN	RP11-407N17.3	CTAGE5;MIA2;FBXO33	MIA2	MIA2	na	CTAGE5;FBXO33	na	na	na	MIA2	FBXO33	CTAGE5;PNN;RP11-407N17.3
rs72681869	logTG	14	50655357	G	C	0.99169	0.053	0.0076	11.5104	8.40041	0.6165	na	na	na	SAV1	SAV1	ARF6	SOS2	na	SOS2	na	na	na	na	na	na	na	SOS2	ARF6;SAV1
rs1151574	logTG	14	52470889	G	A	0.136044	0.011	0.0018	9.00463	8.2184	0.009089	na	C14orf166	C14orf166	C14orf166;NID2	C14orf166;NID2	NID2	C14orf166	NID2	na	na	NID2	NID2	na	na	na	C14orf166;NID2	na	na
rs17124920	HDL	14	52493161	C	T	0.248188	-0.0042	0.0014	2.56867	7.56355	6.43e-09	na	NID2;RTRAF	RTRAF	na	na	na	NID2	NID2	NID2	na	na	NID2	na	na	NID2	na	na	RTRAF
rs7154773	logTG	14	60749118	G	C	0.6361	-0.0092	0.0013	11.8315	10.6191	0.0003783	na	na	na	PPM1A	na	PPM1A	PPM1A	PPM1A	na	na	PPM1A	PPM1A	na	na	PPM1A	na	na	na
rs8012828	LDL	14	64233980	C	T	0.8405	-0.0154	0.0017	18.8799	15.8059	0.0391	na	na	na	SYNE2	na	SGPP1	SGPP1	na	na	ESR2	SGPP1	na	na	na	na	na	SGPP1	SYNE2
rs35372182	TC	14	64236157	G	A	0.169956	0.0166	0.0016	24.4919	20.99	0.01527	na	na	na	SYNE2	na	na	SGPP1	na	na	ESR2	na	na	na	na	na	na	na	SGPP1;SYNE2
rs12897637	nonHDL	14	64239351	C	T	0.155832	0.0179	0.0021	16.8114	14.3501	0.1745	na	na	na	na	na	SGPP1	SGPP1	na	na	ESR2	SGPP1	na	na	na	na	na	SGPP1	na
rs12878001	logTG	14	64239629	G	T	0.174045	0.018	0.0017	25.4712	23.2696	0.008507	na	na	na	na	na	ESR2	SGPP1	na	na	ESR2	na	na	na	na	na	na	na	ESR2;SGPP1
rs2185454	HDL	14	65870594	G	T	0.314796	-0.01	0.0013	13.8401	9.68484	0.2409	na	FUT8	na	na	na	MAX	FUT8	na	na	na	na	na	na	na	na	na	FUT8	MAX
rs72729582	HDL	14	69149372	G	A	0.07903	0.0202	0.0023	17.7966	13.4129	0.249	na	na	na	na	na	ACTN1	RAD51B	na	na	na	na	na	na	na	na	na	na	ACTN1;RAD51B
rs4899263	logTG	14	69285264	G	A	0.466283	-0.0088	0.0013	10.8878	8.48105	0.2616	na	na	na	ZFP36L1	na	DCAF5	ZFP36L1	ZFP36L1	na	na	na	ZFP36L1	na	na	na	ZFP36L1	na	DCAF5
rs1044527	HDL	14	70833819	G	C	0.440438	-0.0102	0.0012	16.7222	11.2082	0.6347	na	SYNJ2BP;ADAM20	na	SLC8A3;COX16;SYNJ2BP;ADAM21;ADAM20;MED6;CTD-2540L5.6;TTC9	SLC8A3;COX16;SYNJ2BP;ADAM21;TTC9	SMOC1	SYNJ2BP	na	na	SMOC1	na	na	na	na	na	SYNJ2BP	ADAM20	ADAM21;COX16;CTD-2540L5.6;MED6;SLC8A3;SMOC1;TTC9
rs7157399	nonHDL	14	70846954	C	T	0.868463	0.0217	0.0022	22.223	19.612	0.04508	na	na	na	SLC8A3;COX16;SYNJ2BP;ADAM21;ADAM20;CTD-2540L5.6;TTC9	SLC8A3;COX16;SYNJ2BP;ADAM21	COX16	SYNJ2BP	na	na	SMOC1	COX16	na	na	na	na	na	COX16;SYNJ2BP	ADAM20;ADAM21;CTD-2540L5.6;SLC8A3;TTC9
rs8022128	TC	14	70847103	G	A	0.868404	0.0179	0.0018	22.574	19.3399	0.1363	na	na	na	SLC8A3;COX16;SYNJ2BP;ADAM21;ADAM20;CTD-2540L5.6;TTC9	SLC8A3;COX16;SYNJ2BP;ADAM21;TTC9	na	SYNJ2BP	na	na	SMOC1	na	na	na	na	na	na	SYNJ2BP	ADAM20;ADAM21;COX16;CTD-2540L5.6;SLC8A3;TTC9
rs6573960	LDL	14	70857022	C	T	0.13242	-0.0246	0.0019	37.6141	34.1515	0.1488	na	na	na	SLC8A3;COX16;SYNJ2BP;ADAM21;ADAM20;MED6;CTD-2540L5.6;TTC9	SLC8A3;COX16;SYNJ2BP;ADAM21;TTC9	na	SYNJ2BP	SYNJ2BP	na	SMOC1	na	SYNJ2BP	na	na	na	SYNJ2BP	na	ADAM20;ADAM21;COX16;CTD-2540L5.6;MED6;SLC8A3;TTC9
rs13379043	HDL	14	74250126	C	T	0.30482	0.0169	0.0014	32.8253	27.847	0.04824	na	na	na	PNMA1;ELMSAN1;RP5-1021I20.2;FAM161B;COQ6;BBOF1;ALDH6A1	RP5-1021I20.2;FAM161B;COQ6;BBOF1;ALDH6A1	ENTPD5	ELMSAN1	ELMSAN1	na	ENTPD5	na	na	na	na	na	ELMSAN1	na	ALDH6A1;BBOF1;COQ6;ENTPD5;FAM161B;PNMA1;RP5-1021I20.2
rs13379043	LDL	14	74250126	C	T	0.304568	-0.0162	0.0014	30.2402	25.2662	0.2085	na	na	na	PNMA1;ELMSAN1;RP5-1021I20.2;FAM161B;COQ6;BBOF1;ALDH6A1	RP5-1021I20.2;FAM161B;COQ6;BBOF1;ALDH6A1	NUMB	ELMSAN1	na	na	ENTPD5	na	na	na	na	na	na	ELMSAN1	ALDH6A1;BBOF1;COQ6;FAM161B;NUMB;PNMA1;RP5-1021I20.2
rs13379043	nonHDL	14	74250126	C	T	0.281693	-0.0172	0.0017	23.3359	19.3047	0.1456	na	na	na	na	na	ENTPD5	ELMSAN1	ELMSAN1	na	ENTPD5	na	na	na	na	na	na	ELMSAN1	ENTPD5
rs13379043	TC	14	74250126	C	T	0.304096	-0.0096	0.0014	11.1533	9.06903	0.04051	na	na	na	na	na	NUMB	ELMSAN1	ELMSAN1	na	ENTPD5	na	na	na	na	na	na	ELMSAN1	NUMB
rs11159104	TC	14	75293374	G	A	0.438567	-0.0115	0.0012	21.027	16.0878	0.3747	na	PROX2;AREL1	PROX2	LTBP2;CTD-2207P18.2;AREL1;FCF1;YLPM1;PROX2;DLST;RPS6KL1;PGF;ZC2HC1C	LTBP2;YLPM1;PROX2;RPS6KL1	NPC2	YLPM1	PROX2;YLPM1	na	NPC2;SYNDIG1L	na	PROX2;YLPM1	na	na	na	PROX2;YLPM1	AREL1	CTD-2207P18.2;DLST;FCF1;LTBP2;NPC2;PGF;RPS6KL1;ZC2HC1C
rs7150254	HDL	14	75299101	G	A	0.560429	0.0088	0.0013	10.8878	8.2991	0.2963	na	na	na	YLPM1;PROX2;DLST;ZC2HC1C	PROX2	PGF	YLPM1	YLPM1;DLST;LTBP2	YLPM1	NPC2;SYNDIG1L	na	YLPM1;DLST	na	na	YLPM1	na	DLST	LTBP2;PGF;PROX2;ZC2HC1C
rs2359239	nonHDL	14	75326771	C	T	0.614223	-0.012	0.0015	14.9051	11.4763	0.4299	na	ZNF410;RPS6KL1;YLPM1;AL049780.1	YLPM1	LTBP2;CTD-2207P18.2;AREL1;YLPM1;PROX2;DLST;ZC2HC1C	LTBP2;YLPM1;PROX2	NPC2	PROX2	YLPM1;DLST	na	NPC2;SYNDIG1L	na	YLPM1;DLST	na	na	na	YLPM1	DLST;PROX2	AL049780.1;AREL1;CTD-2207P18.2;LTBP2;NPC2;RPS6KL1;ZC2HC1C;ZNF410
rs722599	LDL	14	75327443	C	T	0.398795	0.0091	0.0013	11.5918	9.55737	0.2699	na	PROX2;YLPM1	PROX2;YLPM1	YLPM1;PROX2;DLST;ZC2HC1C	PROX2	NPC2	PROX2	PROX2	na	NPC2;SYNDIG1L	na	PROX2	na	na	PROX2	na	YLPM1	DLST;NPC2;ZC2HC1C
rs17109256	HDL	14	79939993	G	A	0.790806	0.0109	0.0016	11.0181	8.47985	0.2267	na	na	na	na	na	na	NRXN3	na	na	na	na	na	na	na	na	na	na	NRXN3
rs12586249	HDL	14	81701004	C	T	0.238482	0.0122	0.0015	15.3792	11.7713	0.4078	na	GTF2A1	GTF2A1	na	na	SEL1L	GTF2A1	GTF2A1	na	TSHR	na	GTF2A1	na	na	na	GTF2A1	na	SEL1L
rs7141800	HDL	14	89804507	C	T	0.773028	0.0144	0.0015	21.0972	15.8414	0.664	na	FOXN3	FOXN3	FOXN3	na	FOXN3	FOXN3	FOXN3	na	na	FOXN3	FOXN3	na	FOXN3	na	na	na	na
rs4904550	logTG	14	89804856	G	A	0.220161	0.0109	0.0016	11.0181	10.3834	0.06998	na	FOXN3	FOXN3	FOXN3	na	FOXN3	FOXN3	FOXN3	na	na	FOXN3	FOXN3	na	FOXN3	na	na	na	na
rs11626777	nonHDL	14	90048934	C	T	0.562863	-0.01	0.0016	9.38674	7.76232	0.1464	na	na	na	FOXN3	na	FOXN3	FOXN3	FOXN3	RP11-944C7.1;RP11-33N16.3	na	FOXN3	FOXN3	na	na	FOXN3	na	na	RP11-33N16.3;RP11-944C7.1
rs34513589	LDL	14	90058243	G	A	0.452499	0.0088	0.0013	10.8878	7.80253	0.1558	na	FOXN3	na	FOXN3	na	FOXN3	FOXN3	na	na	na	FOXN3	na	na	na	FOXN3	na	na	na
rs34513589	TC	14	90058243	G	A	0.467586	0.0085	0.0013	10.2065	7.72838	0.2007	na	FOXN3	na	FOXN3	na	FOXN3	FOXN3	FOXN3	na	na	FOXN3	FOXN3	na	FOXN3	na	na	na	na
rs3835249	HDL	14	92504973	TA	T	0.257182	0.0098	0.0015	10.1916	7.43779	0.1041	na	na	na	na	na	TRIP11	TRIP11	na	RP11-529H20.6;ATXN3	na	TRIP11	na	na	na	na	na	TRIP11	ATXN3;RP11-529H20.6
rs17580	LDL	14	94847262	T	A	0.962184	-0.0495	0.0035	44.6846	40.0209	0.1144	na	na	na	PPP4R4;SERPINA10	SERPINA10	SERPINA1	SERPINA1	SERPINA10;SERPINA6;SERPINA1;OTUB2;IFI27L1	SERPINA1	SERPINA12;SERPINA3;SERPINA5	SERPINA1	SERPINA10;SERPINA1	na	na	SERPINA1	na	SERPINA10	IFI27L1;OTUB2;PPP4R4;SERPINA6
rs17580	nonHDL	14	94847262	T	A	0.961655	-0.044	0.0043	23.8486	19.7181	0.3884	na	na	na	PPP4R4	na	SERPINA6	SERPINA1	SERPINA6;SERPINA10;SERPINA1;OTUB2;DDX24	SERPINA1	SERPINA12;SERPINA3;SERPINA5	na	SERPINA1	na	na	na	SERPINA1	SERPINA6	DDX24;OTUB2;PPP4R4;SERPINA10
rs17580	TC	14	94847262	T	A	0.962162	-0.0475	0.0034	43.6277	37.5143	0.09947	na	na	na	PPP4R4;SERPINA10	SERPINA10	SERPINA1	SERPINA1	SERPINA10;SERPINA1;SERPINA6;DDX24;IFI27L1	SERPINA1	SERPINA12;SERPINA3;SERPINA5	SERPINA1	SERPINA10;SERPINA1	na	na	SERPINA1	na	SERPINA10	DDX24;IFI27L1;PPP4R4;SERPINA6
rs10131519	HDL	14	100359294	C	T	0.224261	-0.0112	0.0015	13.0849	10.3983	0.07474	na	na	na	na	na	EVL	EML1	na	EML1;WARS;RP11-638I2.8	CYP46A1;EML1	na	na	na	na	na	na	EML1	EVL;RP11-638I2.8;WARS
rs61993685	logTG	14	100765823	C	T	0.0684236	-0.0196	0.0026	13.3228	10.1508	0.829	na	BEGAIN	na	SLC25A29	na	SLC25A29	SLC25A29	YY1	na	BEGAIN;DLK1;EML1	SLC25A29	na	na	na	na	SLC25A29	na	BEGAIN;YY1
rs10139403	HDL	14	101194561	G	A	0.622033	-0.0101	0.0014	12.2659	8.06542	0.5473	na	na	na	na	na	YY1	DLK1	DLK1	WARS;RP11-638I2.8;SLC25A47	BEGAIN;DLK1	na	DLK1	na	na	na	na	DLK1	RP11-638I2.8;SLC25A47;WARS;YY1
rs1211836	LDL	14	102622225	C	T	0.241029	-0.0106	0.0015	11.7994	9.30948	0.02031	na	MOK	na	PPP2R5C;HSP90AA1;WDR20;MOK	HSP90AA1;WDR20	DYNC1H1	WDR20	WDR20	na	na	na	WDR20	na	na	na	WDR20	MOK	DYNC1H1;HSP90AA1;PPP2R5C
rs6575900	TC	14	102675350	G	C	0.767649	0.0124	0.0015	15.8609	12.6428	0.0936	na	MOK	na	PPP2R5C;HSP90AA1;WDR20;MOK	HSP90AA1;WDR20	RCOR1	WDR20	HSP90AA1;WDR20	na	na	na	HSP90AA1;WDR20	na	na	na	WDR20	HSP90AA1;MOK	PPP2R5C;RCOR1
rs66970053	HDL	14	103307655	G	C	0.73932	0.0127	0.0015	16.5977	15.6199	0.001367	na	na	na	EXOC3L4	na	CDC42BPB	TRAF3	TRAF3	na	na	na	TRAF3	na	na	na	na	TRAF3	CDC42BPB;EXOC3L4
rs12891399	logTG	14	104293533	C	T	0.322954	0.0108	0.0013	16.0106	12.5187	0.5902	na	na	na	BAG5;KLC1;APOPT1;XRCC3;ZFYVE21;PPP1R13B;CTD-2134A5.4	BAG5;APOPT1;XRCC3;ZFYVE21;PPP1R13B;CTD-2134A5.4	MARK3	PPP1R13B	ZFYVE21;PPP1R13B;KLC1	na	na	na	ZFYVE21;PPP1R13B;KLC1	na	na	na	PPP1R13B	KLC1;ZFYVE21	APOPT1;BAG5;CTD-2134A5.4;MARK3;XRCC3
rs2494747	HDL	14	105258437	G	T	0.44404	0.0268	0.0014	80.9546	74.0467	0.7205	na	C14orf180;INF2;IGHA2;AKT1	AKT1	na	na	AKT1	AKT1	AKT1	na	AKT1	AKT1	AKT1	na	na	AKT1	na	na	C14orf180;IGHA2;INF2
rs3743340	HDL	15	23932467	G	A	0.476281	-0.0093	0.0013	12.0738	8.66548	0.1508	na	NDN;MAGEL2	NDN	na	na	na	NDN	na	na	na	na	na	na	na	na	na	NDN	MAGEL2
rs28624578	logTG	15	31637666	C	T	0.153555	0.012	0.0018	10.5822	8.44808	0.0698	na	na	na	na	na	KLF13	KLF13	na	na	na	KLF13	na	na	na	na	na	KLF13	na
rs275179	HDL	15	39447529	G	A	0.241954	0.0104	0.0016	10.0952	10.1507	0.0003285	na	na	na	na	na	na	C15orf54	na	na	na	na	na	na	na	na	na	na	C15orf54
rs275179	logTG	15	39447529	G	A	0.231912	-0.0131	0.0016	15.574	12.6298	0.1632	na	na	na	RP11-265N7.2;THBS1	THBS1	na	C15orf54	na	na	na	na	na	na	na	na	na	na	C15orf54;RP11-265N7.2;THBS1
rs35477346	logTG	15	40400195	C	T	0.285541	0.0115	0.0014	15.6707	13.46	0.01997	na	SPINT1-AS1;RNU6-516P	SPINT1-AS1	BMF;BAHD1;CHST14;C15orf57;RPUSD2;CASC5	BMF;BAHD1;CHST14;RPUSD2	CASC5	BMF	BMF	BAHD1;RP11-64K12.8;RP11-64K12.9	BAHD1	CASC5	BMF	na	na	na	BMF	BAHD1;CASC5	C15orf57;CHST14;RNU6-516P;RP11-64K12.8;RP11-64K12.9;RPUSD2;SPINT1-AS1
rs2289334	TC	15	40616986	C	T	0.133501	-0.0122	0.0019	9.86859	9.37368	0.0004328	na	C15orf52	na	INAFM2;C15orf52	C15orf52	CASC5	C15orf52	na	na	BAHD1	na	na	na	na	na	C15orf52	na	CASC5;INAFM2
rs3803357	HDL	15	40751555	C	A	0.464076	-0.0102	0.0013	14.3676	10.7063	0.5975	na	BAHD1;AC013356.2;RNU6-516P	AC013356.2;BAHD1	C15orf52	C15orf52	VPS18	BAHD1	BAHD1;CHST14	BAHD1;RP11-64K12.8;RP11-64K12.9	BAHD1	na	BAHD1	na	na	BAHD1	na	na	AC013356.2;C15orf52;CHST14;RNU6-516P;RP11-64K12.8;RP11-64K12.9;VPS18
rs72735627	logTG	15	41057507	C	T	0.920257	0.0207	0.0025	15.9095	12.0657	0.8849	na	AC013356.2;BAHD1;RNU6-516P;GCHFR	AC013356.2;BAHD1	BAHD1;CHST14;C15orf57;RPUSD2;CASC5;RAD51;RMDN3;GCHFR	BAHD1;CHST14;RPUSD2;RAD51;RMDN3	CASC5	GCHFR	GCHFR	BAHD1;RP11-64K12.8;RP11-64K12.9	BAHD1	CASC5	GCHFR	na	na	GCHFR	BAHD1	CASC5	AC013356.2;C15orf57;CHST14;RAD51;RMDN3;RNU6-516P;RP11-64K12.8;RP11-64K12.9;RPUSD2
rs8025212	logTG	15	41880619	G	A	0.304	-0.011	0.0014	14.4056	10.4889	0.8524	na	na	na	RPAP1;TYRO3;RP11-380D11.2;MGA;MAPKBP1;JMJD7	RPAP1;MAPKBP1;JMJD7	MGA	TYRO3	MGA	na	na	MGA	MGA	na	na	na	MGA	TYRO3	JMJD7;MAPKBP1;RP11-380D11.2;RPAP1
rs7170463	HDL	15	41888918	G	A	0.294472	0.0132	0.0014	20.3812	15.9043	0.8338	na	MAPKBP1	na	na	na	CHP1	TYRO3	MGA;MAPKBP1	na	na	na	MAPKBP1	na	na	na	na	MAPKBP1	CHP1;MGA;TYRO3
rs55707100	HDL	15	43820717	C	T	0.975572	0.1023	0.0042	130.312	115.553	0.5925	na	na	na	na	na	PDIA3	MAP1A	MFAP1;TUBGCP4	PPIP5K1;MAP1A	ADAL;UBR1	na	na	na	na	na	na	MAP1A	MFAP1;PDIA3;PPIP5K1;TUBGCP4
rs139974673	logTG	15	44027885	C	T	0.0247126	0.1328	0.0042	218.694	202.725	0.2465	na	na	na	TGM5;TGM7;LCMT2;ADAL;ZSCAN29;TUBGCP4;TP53BP1;MAP1A;CKMT1B;STRC;CATSPER2;CKMT1A;ELL3;SERF2;HYPK;MFAP1;WDR76;FRMD5	TGM5;LCMT2;ADAL;ZSCAN29;TUBGCP4;TP53BP1;MAP1A;CATSPER2;CKMT1A;ELL3;SERF2;HYPK;MFAP1;WDR76;FRMD5	TP53BP1	PDIA3	CTDSPL2	na	ADAL	TP53BP1	na	na	na	na	na	TP53BP1	ADAL;CATSPER2;CKMT1A;CKMT1B;CTDSPL2;ELL3;FRMD5;HYPK;LCMT2;MAP1A;MFAP1;PDIA3;SERF2;STRC;TGM5;TGM7;TUBGCP4;WDR76;ZSCAN29
rs139974673	nonHDL	15	44027885	C	T	0.0247447	0.0404	0.0051	14.6298	10.7974	0.5357	na	na	na	LCMT2;CATSPER2;CKMT1A	CATSPER2	MAP1A	PDIA3	PDIA3;TUBGCP4	PPIP5K1;MAP1A	ADAL	MAP1A	PDIA3	na	na	na	na	MAP1A;PDIA3	CATSPER2;CKMT1A;LCMT2;PPIP5K1;TUBGCP4
rs1901529	logTG	15	45001900	G	A	0.117548	0.0171	0.0021	15.4133	10.9985	0.4745	na	na	na	CASC4;PATL2	CASC4	SHF	PATL2	CTDSPL2	CASC4	B2M;DUOX2	na	na	na	na	na	na	CASC4;PATL2	CTDSPL2;SHF
rs2413926	LDL	15	49336477	T	A	0.655075	0.0132	0.0013	23.4968	17.5951	0.2332	na	AC022306.2	na	SHC4;SECISBP2L;COPS2;GALK2;FAM227B;RP11-295H24.4;FGF7	SECISBP2L;GALK2;RP11-295H24.4	na	SECISBP2L	na	na	na	na	na	na	na	na	na	SECISBP2L	AC022306.2;COPS2;FAM227B;FGF7;GALK2;RP11-295H24.4;SHC4
rs2413926	TC	15	49336477	T	A	0.661721	0.0117	0.0013	18.6464	14.8574	0.3198	na	na	na	SHC4;SECISBP2L;COPS2;GALK2;FAM227B;RP11-295H24.4;FGF7	SECISBP2L;GALK2;RP11-295H24.4	na	SECISBP2L	na	na	na	na	na	na	na	na	na	SECISBP2L	COPS2;FAM227B;FGF7;GALK2;RP11-295H24.4;SHC4
rs55979115	nonHDL	15	49527624	C	T	0.321077	-0.0153	0.0016	20.9395	16.129	0.2952	na	na	na	SHC4;SECISBP2L;COPS2;GALK2;FAM227B;RP11-295H24.4;FGF7;DTWD1	SECISBP2L;GALK2;RP11-295H24.4	na	GALK2	COPS2	na	na	na	COPS2	na	na	na	na	COPS2;GALK2	DTWD1;FAM227B;FGF7;RP11-295H24.4;SECISBP2L;SHC4
rs35336805	HDL	15	50993673	TAAAA	T	0.792725	0.0119	0.0017	11.5918	8.34822	0.1032	na	na	na	na	na	TRPM7	SPPL2A	na	na	AP4E1	na	na	na	na	na	na	na	SPPL2A;TRPM7
rs2414178	HDL	15	53001538	C	T	0.224141	0.0095	0.0015	9.61993	8.19594	0.03607	na	na	na	ONECUT1	na	MYO5A	FAM214A	FAM214A	na	na	na	na	na	na	na	na	FAM214A	MYO5A;ONECUT1
rs6493583	LDL	15	53096084	G	C	0.144192	-0.0142	0.0018	14.5159	13.1186	0.002216	na	na	na	ONECUT1	na	na	ONECUT1	ONECUT1	na	na	na	ONECUT1	na	na	na	ONECUT1	na	na
rs6493583	nonHDL	15	53096084	G	C	0.141	-0.015	0.0021	12.039	10.4197	0.004647	na	na	na	ONECUT1	na	na	ONECUT1	ONECUT1	na	na	na	ONECUT1	na	na	na	ONECUT1	na	na
rs6493583	TC	15	53096084	G	C	0.145099	-0.0133	0.0017	14.2894	14.1219	0.0001817	na	na	na	ONECUT1	na	na	ONECUT1	ONECUT1	na	na	na	ONECUT1	na	na	na	ONECUT1	na	na
rs79391862	LDL	15	53739426	C	A	0.018985	-0.0649	0.0053	33.7494	27.9988	0.5071	na	na	na	na	na	na	WDR72	na	na	na	na	na	na	na	na	na	na	WDR72
rs79391862	nonHDL	15	53739426	C	A	0.0226863	-0.0582	0.0058	22.9685	17.7969	0.9233	na	na	na	na	na	na	WDR72	na	na	na	na	na	na	na	na	na	na	WDR72
rs79391862	TC	15	53739426	C	A	0.0192737	-0.06	0.0051	31.2267	24.6657	0.9014	na	na	na	na	na	na	WDR72	na	na	na	na	na	na	na	na	na	na	WDR72
rs1642929	HDL	15	57254842	T	A	0.748288	-0.0102	0.0014	12.4949	9.00261	0.1501	na	na	na	LINC00926	LINC00926	TCF12	TCF12	TCF12	na	na	TCF12	TCF12	na	na	na	TCF12	na	LINC00926
rs72749502	LDL	15	57297078	T	A	0.0662912	0.0289	0.0027	26.0097	22.7973	0.03042	na	na	na	LINC00926	LINC00926	CGNL1	TCF12	na	na	na	na	na	na	na	na	na	na	CGNL1;LINC00926;TCF12
rs72749502	logTG	15	57297078	T	A	0.0662733	0.029	0.0026	28.1638	24.6156	0.001127	na	na	na	ZNF280D;TCF12;LINC00926	na	TCF12	TCF12	TCF12;ZNF280D	na	na	TCF12	TCF12;ZNF280D	na	na	TCF12	na	ZNF280D	LINC00926
rs72749502	nonHDL	15	57297078	T	A	0.0676367	0.0382	0.003	36.4134	29.9782	0.2571	na	na	na	RP11-323F24.3;TCF12;LINC00926	TCF12	ZNF280D	TCF12	TCF12	na	na	na	TCF12	na	na	na	TCF12	na	LINC00926;RP11-323F24.3;ZNF280D
rs72749502	TC	15	57297078	T	A	0.0650427	0.0319	0.0025	36.5619	29.9901	0.06477	na	na	na	RP11-323F24.3;TCF12;LINC00926	TCF12;LINC00926	TCF12	TCF12	TCF12	na	na	TCF12	TCF12	na	na	TCF12	na	na	LINC00926;RP11-323F24.3
rs2433204	HDL	15	57920703	G	A	0.433066	0.0089	0.0012	12.9204	9.51524	0.2028	na	na	na	LINC00926	LINC00926	TCF12	GCOM1	GCOM1;GCOM1	na	na	na	GCOM1	na	na	na	GCOM1	na	LINC00926;TCF12
rs261291	HDL	15	58680178	C	T	0.371057	0.1004	0.0013	1297.18	1240.62	1.79e-16	LIPC	na	na	na	na	LIPC	ALDH1A2	LIPC	LIPC	AQP9;LIPC	na	na	na	na	na	LIPC	na	ALDH1A2
rs35980001	LDL	15	58722590	GC	G	0.229685	0.0134	0.0016	16.2579	17.8177	3.49e-05	LIPC	LIPC	na	na	na	LIPC	ALDH1A2	LIPC	LIPC	AQP9;LIPC	LIPC	LIPC	na	na	LIPC	na	na	ALDH1A2
rs1077835	logTG	15	58723426	G	A	0.25421	0.0451	0.0014	226.953	192.794	1.99e-06	LIPC	LIPC	LIPC	ALDH1A2;LIPC;ADAM10	ALDH1A2;LIPC;ADAM10	LIPC	ALDH1A2	LIPC	LIPC	AQP9;LIPC	LIPC	LIPC	na	LIPC	na	na	ALDH1A2	ADAM10
rs1077835	nonHDL	15	58723426	G	A	0.249206	0.0248	0.0017	47.4766	42.629	0.0127	LIPC	LIPC	LIPC	LIPC	LIPC	LIPC	ALDH1A2	LIPC	na	AQP9;LIPC	LIPC	LIPC	na	na	LIPC	na	na	ALDH1A2
rs2070895	TC	15	58723939	G	A	0.738954	-0.0617	0.0014	423.506	404.632	6.3e-06	LIPC	LIPC;MYZAP	LIPC	ALDH1A2;LIPC;ADAM10;FAM63B;RNF111	ALDH1A2;LIPC;ADAM10;FAM63B	LIPC	ALDH1A2	LIPC	LIPC	AQP9;LIPC	LIPC	LIPC	na	LIPC	na	na	ALDH1A2	ADAM10;FAM63B;MYZAP;RNF111
rs112147665	HDL	15	59277019	C	T	0.00228565	0.3018	0.0177	64.4628	50.6694	0.8011	LIPC	LIPC;ADAM10;LIPC-AS1;ALDH1A2	LIPC;ADAM10;LIPC-AS1;ALDH1A2	na	na	LIPC	RNF111	na	LIPC	na	LIPC	na	na	na	na	LIPC	na	ADAM10;ALDH1A2;LIPC-AS1;RNF111
rs112147665	logTG	15	59277019	C	T	0.0022501	0.1836	0.018	23.7027	16.4924	0.7432	LIPC	na	na	ALDH1A2;LIPC;ADAM10	ALDH1A2;LIPC;ADAM10	LIPC	RNF111	na	LIPC	na	LIPC	na	na	na	na	LIPC	na	ADAM10;ALDH1A2;RNF111
rs112147665	TC	15	59277019	C	T	0.00221087	0.1596	0.0176	18.9171	13.6764	0.3473	LIPC	LIPC;ADAM10;ALDH1A2;LIPC-AS1	LIPC;ADAM10;ALDH1A2;LIPC-AS1	ALDH1A2;LIPC;ADAM10;FAM63B;RNF111	ALDH1A2;LIPC;ADAM10;FAM63B	LIPC	RNF111	na	LIPC	na	LIPC	na	na	na	LIPC	na	ADAM10;ALDH1A2;RNF111	FAM63B;LIPC-AS1
rs187359403	HDL	15	59780362	G	C	0.00157604	0.1542	0.0201	13.77	10.3373	0.03079	na	na	na	na	na	MYO1E	FAM81A	na	na	BNIP2	na	na	na	na	na	na	na	FAM81A;MYO1E
rs12438742	HDL	15	61947280	G	C	0.530266	0.01	0.0013	13.8401	12.6777	0.00295	na	AC104574.2;AC018618.1;AC104574.1	AC104574.2;AC018618.1	na	na	RORA	VPS13C	na	na	RORA;VPS13C	na	na	na	na	na	na	na	AC018618.1;AC104574.1;AC104574.2;RORA;VPS13C
rs2245899	logTG	15	61952501	G	A	0.568701	-0.01	0.0012	16.1046	10.7097	0.8364	na	RORA;AC104574.2;AC018618.1	na	RORA;RP11-507B12.2;RP11-259A24.1;RP11-507B12.1;RP11-162I7.1	RP11-507B12.2;RP11-259A24.1;RP11-507B12.1;RP11-162I7.1	RORA	VPS13C	na	na	RORA;VPS13C	RORA	na	na	na	na	RORA	na	AC018618.1;AC104574.2;RP11-162I7.1;RP11-259A24.1;RP11-507B12.1;RP11-507B12.2;VPS13C
rs55719615	HDL	15	63344167	G	A	0.322528	-0.0161	0.0014	29.8797	25.917	0.1282	na	na	na	AC007950.2;USP3	AC007950.2;USP3	USP3	TPM1	TPM1	na	USP3	USP3	TPM1	na	na	na	na	TPM1;USP3	AC007950.2
rs11636087	LDL	15	63788267	C	T	0.274198	0.0138	0.0015	19.4462	16.1902	0.7747	na	USP3-AS1;USP3	USP3-AS1;USP3	AC007950.2;USP3;HERC1	AC007950.2;USP3;HERC1	HERC1	USP3	na	na	FBXL22;USP3	HERC1	na	na	na	na	USP3	HERC1	AC007950.2;USP3-AS1
rs62011285	nonHDL	15	63791063	C	T	0.313234	0.0171	0.0017	23.0757	21.5314	0.1525	na	USP3-AS1;USP3	USP3-AS1;USP3	TPM1;AC007950.2;USP3;HERC1	TPM1;AC007950.2;USP3;HERC1	HERC1	USP3	USP3	na	FBXL22;USP3	HERC1	USP3	na	na	USP3	na	HERC1	AC007950.2;TPM1;USP3-AS1
rs62011285	TC	15	63791063	C	T	0.304072	0.0165	0.0013	36.1855	27.9287	0.5944	na	USP3;USP3-AS1	USP3;USP3-AS1	AC007950.2;USP3;HERC1	AC007950.2;USP3;HERC1	HERC1	USP3	USP3	na	FBXL22;USP3	HERC1	USP3	na	na	USP3	na	HERC1	AC007950.2;USP3-AS1
rs11635675	logTG	15	63793238	G	T	0.316179	0.0235	0.0014	62.508	57.5006	0.3068	na	USP3-AS1;USP3	USP3;USP3-AS1	TPM1;RP11-69G7.1;LACTB;RAB8B;APH1B;AC007950.1;AC007950.2;USP3;FBXL22;HERC1;DAPK2	TPM1;LACTB;AC007950.1;AC007950.2;USP3;FBXL22;HERC1;DAPK2	HERC1	USP3	USP3	na	FBXL22;USP3	HERC1	USP3	na	na	USP3	na	HERC1	AC007950.1;AC007950.2;APH1B;DAPK2;FBXL22;LACTB;RAB8B;RP11-69G7.1;TPM1;USP3-AS1
rs75663391	HDL	15	63910433	G	T	0.389609	-0.0124	0.0015	15.8609	13.7526	0.04683	na	LACTB;TPM1-AS;RPS27L;RAB8B;TPM1	TPM1-AS	AC007950.2;USP3;HERC1	AC007950.2;USP3;HERC1	HERC1	HERC1	na	LACTB;RPS27L	FBXL22;USP3	HERC1	na	na	na	na	HERC1	LACTB;RPS27L	AC007950.2;RAB8B;TPM1;TPM1-AS;USP3
rs4776793	logTG	15	66872114	C	T	0.652905	-0.0131	0.0013	23.1556	19.6309	0.4013	na	na	na	MAP2K1;SNAPC5;ZWILCH;LCTL;LINC01169	MAP2K1	SMAD3	RP11-321F6.1	na	na	na	na	na	na	na	na	na	na	LCTL;LINC01169;MAP2K1;RP11-321F6.1;SMAD3;SNAPC5;ZWILCH
rs2469128	HDL	15	66877172	G	A	0.572566	-0.0102	0.0013	14.3676	12.1615	0.02573	na	na	na	na	na	SMAD3	RP11-321F6.1	na	na	na	na	na	na	na	na	na	na	RP11-321F6.1;SMAD3
rs4147358	LDL	15	67428014	C	A	0.747801	-0.009	0.0015	8.70483	7.51407	0.6229	na	na	na	na	na	SMAD3	SMAD3	na	RP11-321F6.1	na	SMAD3	na	na	na	na	na	SMAD3	RP11-321F6.1
rs4147358	nonHDL	15	67428014	C	A	0.74518	-0.012	0.0017	11.7749	9.08178	0.2645	na	na	na	SMAD3	na	SMAD3	SMAD3	SMAD3	na	na	SMAD3	SMAD3	na	na	SMAD3	na	na	na
rs4147358	TC	15	67428014	C	A	0.737267	-0.0097	0.0014	11.3715	7.97635	0.6981	na	na	na	SMAD3	SMAD3	SMAD3	SMAD3	SMAD3	na	na	SMAD3	SMAD3	na	na	SMAD3	na	na	na
rs10518739	HDL	15	68014971	C	T	0.56014	0.009	0.0013	11.3546	7.92598	0.6836	na	SKOR1;C15orf61	na	na	na	PIAS1	MAP2K5	MAP2K5	na	na	na	MAP2K5	na	na	na	na	MAP2K5	C15orf61;PIAS1;SKOR1
rs77648222	HDL	15	70182851	G	A	0.027344	0.0354	0.0039	18.952	12.9979	0.5542	na	na	na	na	na	TLE3	TLE3	na	na	na	TLE3	na	na	na	na	na	TLE3	na
rs12591142	logTG	15	70189590	C	A	0.0231417	-0.0222	0.0043	6.61387	7.58603	0.0009053	na	na	na	na	na	TLE3	TLE3	na	na	na	TLE3	na	na	na	na	na	TLE3	na
rs713048	logTG	15	72543084	G	A	0.758187	0.0123	0.0015	15.6191	11.3518	0.313	na	MYO9A	MYO9A	NR2E3;MYO9A;SENP8;GRAMD2;PKM;PARP6;HIGD2B;BBS4	NR2E3;MYO9A;PKM;PARP6	ARIH1	PARP6	PKM2;HEXA	na	BBS4	na	na	na	na	na	na	MYO9A;PARP6	ARIH1;BBS4;GRAMD2;HEXA;HIGD2B;NR2E3;PKM;PKM2;SENP8
rs3850986	logTG	15	73091283	G	T	0.369652	-0.0101	0.0013	14.1026	10.1343	0.1899	na	BBS4	na	HIGD2B;BBS4;ADPGK;NEO1	ADPGK;NEO1	ARIH1	ADPGK	na	na	BBS4	na	na	na	na	na	na	ADPGK;BBS4	ARIH1;HIGD2B;NEO1
rs2415142	HDL	15	73431600	G	T	0.565863	-0.0086	0.0013	10.4311	7.42831	0.6833	na	na	na	na	na	BBS4	NEO1	na	na	BBS4;NPTN	na	na	na	na	na	na	na	BBS4;NEO1
rs12917376	LDL	15	75116167	C	T	0.49549	-0.0116	0.0013	18.3434	14.4115	0.2145	na	FAM219B;MPI;SCAMP2;ULK3	FAM219B;SCAMP2	SEMA7A;EDC3;CYP1A1;CSK;LMAN1L;CPLX3;ULK3;SCAMP2;MPI;FAM219B;COX5A;RPP25;SCAMP5;PPCDC	SEMA7A;EDC3;CYP1A1;CSK;LMAN1L;ULK3;SCAMP2;MPI;FAM219B;RPP25;PPCDC	CSK	LMAN1L	CYP1A2;SCAMP2;CSK	MPI	CYP11A1	CSK	SCAMP2;CSK	na	na	na	CSK;MPI;SCAMP2	FAM219B;LMAN1L;ULK3	COX5A;CPLX3;CYP1A1;CYP1A2;EDC3;PPCDC;RPP25;SCAMP5;SEMA7A
rs6495122	nonHDL	15	75125645	C	A	0.521212	0.0102	0.0016	9.73764	7.97062	0.2	na	FAM219B;MPI	FAM219B	SEMA7A;EDC3;CYP1A1;CSK;LMAN1L;SCAMP2;MPI;FAM219B;COX5A;RPP25;SCAMP5	SEMA7A;EDC3;CYP1A1;CSK;SCAMP2;FAM219B;RPP25	CYP1A1	CPLX3	SCAMP2;CSK;C15orf17	LMAN1L;RP11-414J4.2;CPLX3;MPI	CYP11A1	CYP1A1	SCAMP2;CSK	na	na	na	MPI	CPLX3;CSK;CYP1A1;FAM219B;LMAN1L;SCAMP2	C15orf17;COX5A;EDC3;RP11-414J4.2;RPP25;SCAMP5;SEMA7A
rs6495122	TC	15	75125645	C	A	0.519379	0.0109	0.0013	16.2934	13.5252	0.222	na	SCAMP2;MPI;FAM219B	FAM219B	SEMA7A;ARID3B;CLK3;EDC3;CYP1A1;CSK;LMAN1L;ULK3;SCAMP2;MPI;FAM219B;COX5A;RPP25;SCAMP5;PPCDC	SEMA7A;CLK3;EDC3;CYP1A1;CSK;ULK3;SCAMP2;MPI;FAM219B;RPP25;SCAMP5;PPCDC	CYP1A1	CPLX3	SCAMP2;CSK	MPI	CYP11A1	CYP1A1	SCAMP2;CSK	na	na	na	MPI;SCAMP2	CSK;CYP1A1;FAM219B	ARID3B;CLK3;COX5A;CPLX3;EDC3;LMAN1L;PPCDC;RPP25;SCAMP5;SEMA7A;ULK3
rs9920066	TC	15	89086653	T	A	0.6636	0.0088	0.0013	10.8878	8.44881	0.4913	na	na	na	DET1	DET1	ISG20	DET1	na	na	ACAN	na	na	na	na	na	na	DET1	ISG20
rs139271800	HDL	15	90214777	G	A	0.000845	0.191	0.0282	10.8993	8.01862	0.9057	na	na	na	ZNF710	na	ANPEP	PLIN1	na	PLIN1	na	na	na	na	na	na	na	PLIN1	ANPEP;ZNF710
rs139271800	logTG	15	90214777	G	A	0.00084	-0.1926	0.0282	11.0704	8.13108	0.6089	na	na	na	na	na	ABHD2	PLIN1	na	PLIN1	na	na	na	na	na	na	na	PLIN1	ABHD2
rs56332871	HDL	15	96714816	C	A	0.713329	-0.0118	0.0014	16.456	11.8761	0.4895	na	AC012409.1	AC012409.1	na	na	na	AC016251.1	na	na	na	na	na	na	na	na	na	na	AC012409.1;AC016251.1
rs1976668	HDL	15	99281192	C	T	0.392933	-0.0092	0.0013	11.8315	8.3898	0.2776	na	IGF1R	na	na	na	IGF1R	IGF1R	na	na	na	IGF1R	na	na	na	na	IGF1R	na	na
rs1037117	HDL	15	102068658	G	A	0.719884	-0.0103	0.0014	12.7261	8.41001	0.893	na	na	na	PCSK6	PCSK6	na	PCSK6	PCSK6	na	LRRK1	na	PCSK6	na	na	na	PCSK6	na	na
rs1037117	LDL	15	102068658	G	A	0.727791	0.0103	0.0014	12.7261	9.0188	0.1914	na	na	na	PCSK6	PCSK6	PCSK6	PCSK6	na	PCSK6;RP11-299G20.2	LRRK1	PCSK6	na	na	na	PCSK6	na	na	RP11-299G20.2
rs1037117	logTG	15	102068658	G	A	0.727533	-0.0149	0.0014	25.7252	19.5499	0.4587	na	na	na	PCSK6	PCSK6	PCSK6	PCSK6	PCSK6	na	LRRK1	PCSK6	PCSK6	na	na	PCSK6	na	na	na
rs12600110	logTG	16	962154	C	T	0.413027	-0.0124	0.0013	20.8387	20.253	2.75e-05	LMF1	na	na	LA16c-360A4.1;LMF1;RP11-161M6.2;SOX8;TPSG1	LMF1;SOX8	UBE2I	LMF1	na	STUB1	LMF1;RHBDL1;SSTR5	na	na	na	na	na	na	LMF1	LA16c-360A4.1;RP11-161M6.2;SOX8;STUB1;TPSG1;UBE2I
rs7404696	HDL	16	1012393	C	T	0.319102	0.0117	0.0014	16.1921	15.1349	0.0006176	LMF1	LMF1;LMF1-AS1;AL031008.1;SOX8;AC009041.2	LMF1-AS1;SOX8	UBE2I	na	UBE2I	LMF1	na	LA16c-366D3.1;LMF1	LMF1;RHBDL1;SSTR5	UBE2I	na	na	na	na	LMF1	UBE2I	AC009041.2;AL031008.1;LA16c-366D3.1;LMF1-AS1;SOX8
rs9597	TC	16	1374951	G	C	0.0405161	-0.0242	0.0034	11.9595	8.48331	0.8517	LMF1	na	na	UBE2I	UBE2I	UBE2I	UBE2I	UBE2I	na	IFT140;IGFALS;LMF1;SSTR5	UBE2I	UBE2I	na	na	UBE2I	na	na	na
rs74002781	TC	16	2146288	C	T	0.887186	-0.0115	0.002	8.04942	7.59302	0.001958	na	AC009065.5;RAB26	na	PKD1;RAB26	PKD1;RAB26	PKD1	PKD1	TSC2	PKD1;RP11-304L19.4	ABCA3;DNASE1L2;ECI1;GFER;IFT140;IGFALS	PKD1	na	na	na	PKD1	na	RAB26	AC009065.5;RP11-304L19.4;TSC2
rs28605000	HDL	16	2163962	G	A	0.103084	0.0108	0.0022	6.03858	8.43843	1.56e-05	na	AL133297.2	na	na	na	PKD1	PKD1	TSC2	HAGH	ABCA3;DNASE1L2;ECI1;GFER;IGFALS	PKD1	na	na	na	na	na	PKD1	AL133297.2;HAGH;TSC2
rs2238435	HDL	16	4014282	G	C	0.556856	-0.0089	0.0013	11.12	8.59809	0.03095	na	AC005736.1;ADCY9	AC005736.1	na	na	CREBBP	ADCY9	ADCY9	na	CREBBP;TFAP4	na	ADCY9	na	na	na	ADCY9	na	AC005736.1;CREBBP
rs12921195	HDL	16	4677604	C	A	0.864493	0.0148	0.0021	11.7399	8.42778	0.3978	na	na	na	UBN1	na	MGRN1	MGRN1	MGRN1	ANKS3;NUDT16L1;UBN1	TFAP4	MGRN1	MGRN1	na	na	na	MGRN1	UBN1	ANKS3;NUDT16L1
rs12921195	logTG	16	4677604	C	A	0.864835	-0.0166	0.0021	14.5711	12.492	0.02119	na	na	na	PAM16;CORO7;VASN;DNAJA3;NMRAL1;HMOX2;CDIP1;C16orf96;UBALD1;MGRN1;NUDT16L1;ANKS3;ZNF500;UBN1	PAM16;CORO7;VASN;NMRAL1;HMOX2;CDIP1;UBALD1;MGRN1	MGRN1	MGRN1	MGRN1	na	TFAP4	MGRN1	MGRN1	na	na	MGRN1	na	na	ANKS3;C16orf96;CDIP1;CORO7;DNAJA3;HMOX2;NMRAL1;NUDT16L1;PAM16;UBALD1;UBN1;VASN;ZNF500
rs62025680	HDL	16	11464263	G	A	0.814397	-0.0144	0.0016	18.6464	13.7201	0.08911	na	na	na	CTD-3088G3.8;LITAF	CTD-3088G3.8;LITAF	TXNDC11	CTD-3088G3.8	na	na	na	na	na	na	na	na	na	CTD-3088G3.8	LITAF;TXNDC11
rs12445804	LDL	16	11706100	G	A	0.903281	-0.0293	0.0023	36.4457	31.7402	0.01303	na	na	na	CTD-3088G3.8;LITAF	CTD-3088G3.8;LITAF	SOCS1	LITAF	LITAF	na	na	na	LITAF	na	na	na	LITAF	na	CTD-3088G3.8;SOCS1
rs12445804	nonHDL	16	11706100	G	A	0.888992	-0.0304	0.0026	30.8553	27.3477	0.1152	na	na	na	CTD-3088G3.8;LITAF	CTD-3088G3.8;LITAF	TXNDC11	LITAF	LITAF	na	na	na	LITAF	na	na	na	LITAF	na	CTD-3088G3.8;TXNDC11
rs12445804	TC	16	11706100	G	A	0.899465	-0.0305	0.0022	42.978	36.6708	0.08224	na	na	na	RMI2;SOCS1;PRM1;CTD-3088G3.8;LITAF;SNN	SOCS1;CTD-3088G3.8;LITAF;SNN	TXNDC11	LITAF	LITAF	RMI2	na	na	LITAF	na	na	na	LITAF	RMI2	CTD-3088G3.8;PRM1;SNN;SOCS1;TXNDC11
rs4780401	logTG	16	11839326	G	T	0.428278	-0.0092	0.0013	11.8315	8.1254	0.8758	na	SNN;AC007613.1	SNN	SNN;TXNDC11	SNN;TXNDC11	TXNDC11	TXNDC11	TXNDC11	SNN;TXNDC11;RSL1D1	na	TXNDC11	TXNDC11	na	TXNDC11	na	SNN	na	AC007613.1;RSL1D1
rs142861907	LDL	16	14395073	TG	T	0.66303	0.0101	0.0015	10.7804	7.78243	0.4747	na	MKL2	na	MIR193BHG	na	BFAR	MKL2	na	na	PLA2G10	na	na	na	na	na	na	MKL2	BFAR;MIR193BHG
rs142861907	TC	16	14395073	TG	T	0.662756	0.0106	0.0014	13.4328	9.24751	0.3718	na	na	na	MIR193BHG	na	BFAR	MKL2	na	na	PLA2G10	na	na	na	na	na	na	na	BFAR;MIR193BHG;MKL2
rs12928099	logTG	16	15150505	C	A	0.733757	0.0259	0.0015	66.0765	60.4407	0.6292	na	NTAN1;PDXDC1;AC138932.3;AC138932.5	NTAN1;AC138932.3	BFAR;NPIPA1;PDXDC1;NTAN1;RRN3;NPIPA5;MPV17L;C16orf45	NPIPA1;PDXDC1;NTAN1;NPIPA5;C16orf45	PDXDC1	PDXDC1	PDXDC1;RRN3	na	PLA2G10	PDXDC1	PDXDC1;RRN3	na	PDXDC1	na	na	NTAN1;RRN3	AC138932.3;AC138932.5;BFAR;C16orf45;MPV17L;NPIPA1;NPIPA5
rs11644601	HDL	16	15172118	C	T	0.269451	0.0186	0.0015	34.5828	28.4718	0.8697	na	NTAN1;AC138932.3;AC138932.5;PDXDC1	NTAN1;AC138932.3	na	na	PDXDC1	PDXDC1	RRN3;PDXDC1	na	PLA2G10	PDXDC1	PDXDC1	na	na	PDXDC1	na	na	AC138932.3;AC138932.5;NTAN1;RRN3
rs12446632	TC	16	19935389	G	A	0.873167	-0.0141	0.0018	14.3232	9.9404	0.5341	na	SYT17;GPRC5B	na	GPRC5B	na	na	GPRC5B	na	na	UMOD	na	na	na	na	na	GPRC5B	na	SYT17
rs11641335	HDL	16	19967822	C	T	0.858952	-0.012	0.0018	10.5822	8.4506	0.005535	na	LYRM1;GPRC5B	na	na	na	na	GPRC5B	na	na	UMOD	na	na	na	na	na	na	GPRC5B	LYRM1
rs66487676	TC	16	21089905	G	T	0.571591	-0.0081	0.0012	10.8302	8.12991	0.2568	na	DCUN1D3	na	DNAH3	na	na	DNAH3	na	na	DCUN1D3	na	na	na	na	na	na	DNAH3	DCUN1D3
rs7187333	HDL	16	28865916	G	A	0.644464	0.009	0.0013	11.3546	8.71364	0.01592	na	EIF3C;AC145285.2;LAT;SH2B1;ATP2A1;AC145285.5;ATXN2L	EIF3C;AC145285.2;ATXN2L	na	na	ATXN2L	SH2B1	ATXN2L;NUPR1;CLN3;SULT1A2;SH2B1;APOBR	ATXN2L;RP11-24N18.1;SH2B1	na	ATXN2L	ATXN2L;SH2B1	na	na	ATXN2L;SH2B1	na	na	AC145285.2;AC145285.5;APOBR;ATP2A1;CLN3;EIF3C;LAT;NUPR1;RP11-24N18.1;SULT1A2
rs7501203	TC	16	28899411	C	T	0.669969	-0.008	0.0013	9.12133	7.73607	0.004072	na	NPIPB6;AC109460.2;NFATC2IP;SLX1B;XPO6;ATP2A1;CD19	NPIPB6;AC109460.2;NFATC2IP	EIF3CL;EIF3C;RP11-1348G14.4;ATXN2L;ATP2A1;CD19;NFATC2IP;SPNS1;LAT	ATP2A1;NFATC2IP;SPNS1;LAT	ATXN2L	ATP2A1	ATXN2L;RABEP2;LAT;CD19;SH2B1	SH2B1;ATXN2L;RP11-24N18.1	na	ATXN2L	ATXN2L;LAT;CD19;SH2B1	na	na	ATXN2L	ATP2A1;CD19	LAT;NFATC2IP;SH2B1	AC109460.2;EIF3C;EIF3CL;NPIPB6;RABEP2;RP11-1348G14.4;RP11-24N18.1;SLX1B;SPNS1;XPO6
rs3814883	HDL	16	29994922	C	T	0.552442	0.0123	0.0013	20.5179	15.965	0.3746	na	TMEM219;INO80E;KCTD13;AC002310.1	KCTD13	na	na	MAPK3	TAOK2	TAOK2;PPP4C;INO80E;ALDOA	INO80E;DOC2A	na	na	INO80E;TAOK2	na	na	na	INO80E	TAOK2	AC002310.1;ALDOA;DOC2A;KCTD13;MAPK3;PPP4C;TMEM219
rs11076	TC	16	30995528	G	A	0.629073	-0.0122	0.0013	20.1997	16.3925	0.1165	na	HSD3B7;SETD1A;STX4;STX1B;ZNF646;AC135048.4	HSD3B7;STX4	ZNF768;ZNF747;ZNF689;PRR14;FBRS;SRCAP;PHKG2;CCDC189;RNF40;ZNF629;RP11-2C24.7;BCL7C;CTF1;FBXL19;ORAI3;RP11-1072A3.4;SETD1A;HSD3B7;STX1B;STX4;RP11-196G11.2;RP11-196G11.6;ZNF668;ZNF646;PRSS53;VKORC1;BCKDK	ZNF768;ZNF689;PRR14;CCDC189;RNF40;ZNF629;RP11-2C24.7;FBXL19;RP11-1072A3.4;SETD1A;HSD3B7;STX1B;STX4;RP11-196G11.2;RP11-196G11.6;ZNF668;ZNF646;PRSS53;VKORC1;BCKDK	FUS	SETD1A	ORAI3;HSD3B7;SETD1A;STX4;VKORC1;ZNF646;ZNF668	STX1B;HSD3B7;AC135048.1;SETD1A;FBXL19;FBXL19-AS1	CTF1;HSD3B7;SETD1A;SRCAP;TGFB1I1	na	ORAI3;HSD3B7;SETD1A;STX4;VKORC1;ZNF646;ZNF668	na	SETD1A	HSD3B7	STX1B;STX4;ZNF646	FBXL19;ORAI3;VKORC1;ZNF668	AC135048.1;AC135048.4;BCKDK;BCL7C;CCDC189;CTF1;FBRS;FBXL19-AS1;FUS;PHKG2;PRR14;PRSS53;RNF40;RP11-1072A3.4;RP11-196G11.2;RP11-196G11.6;RP11-2C24.7;SRCAP;ZNF629;ZNF689;ZNF747;ZNF768
rs140820592	LDL	16	31021880	G	T	0.614304	-0.0131	0.0014	20.0866	15.0762	0.3105	na	STX1B;AC135050.3;AC135048.4;STX4;KAT8;HSD3B7;PRSS53;SETD1A;ZNF646;VKORC1;PRSS8;ZNF668	PRSS53;AC135050.3;ZNF646;STX1B;HSD3B7	ZNF768;ZNF689;PRR14;FBRS;SRCAP;PHKG2;RNF40;ZNF629;RP11-2C24.7;BCL7C;CTF1;FBXL19;ORAI3;RP11-1072A3.4;SETD1A;HSD3B7;STX1B;STX4;RP11-196G11.2;RP11-196G11.6;ZNF668;ZNF646;PRSS53;VKORC1;BCKDK;KAT8;PRSS8;PR	ZNF768;ZNF689;PRR14;RNF40;ZNF629;FBXL19;RP11-1072A3.4;SETD1A;HSD3B7;STX1B;STX4;RP11-196G11.2;RP11-196G11.6;ZNF668;ZNF646;PRSS53;VKORC1;BCKDK;KAT8;PRSS8	FUS	STX1B	ORAI3;HSD3B7;VKORC1;STX4	STX1B;HSD3B7;AC135048.1;SETD1A;RP11-196G11.1;ZNF646;PRSS53	CTF1;HSD3B7;SETD1A;SRCAP;TGFB1I1	na	ORAI3;HSD3B7;VKORC1;STX4	na	na	HSD3B7;STX1B	PRSS53;SETD1A;STX4;VKORC1;ZNF646	KAT8;ORAI3;PRSS8;ZNF668	AC135048.1;AC135048.4;AC135050.3;BCKDK;BCL7C;CTF1;FBRS;FBXL19;FUS;PHKG2;PR;PRR14;RNF40;RP11-1072A3.4;RP11-196G11.1;RP11-196G11.2;RP11-196G11.6;RP11-2C24.7;SRCAP;ZNF629;ZNF689;ZNF768
[truncated: 527 more rows]
