# Supplementary material for: Implicating genes, pleiotropy, and sexual dimorphism at blood lipid loci through multi-ancestry meta-analysis
Source: Genome Biol. 2022 Dec 27;23:268. doi: 10.1186/s13059-022-02837-1 (PMC9793579; doi:10.1186/s13059-022-02837-1)
Supplement: Supplementary file 4 — Additional file 4: Table S3. Text mining results for the PoPS+ prioritized genes. [file 13059_2022_2837_MOESM4_ESM.xlsx]

## Sheet: Sheet1
Table S3. Text mining results for the PoPS+ prioritized genes
Category	PMID	PublicationDate	Match	Matching terms	Article Title
pops_plus	18193043	20080115	23	lipc, cetp, lipg, apoa1, apoe, apob, triglycerides, coronary, angptl3, galnt2, pcsk9, lipid, mlxipl, cholesterol, ldlr, trib1, artery, diabetes, type 2 diabetes, coronary artery, lpl, abca1, sort1	Newly identified loci that influence lipid concentrations and risk of coronary artery disease.
pops_plus	30720493	20190206	19	lipa, apoa1, pcsk9, apob, lipid, abcg5, lcat, lipc, ldlrap1, cyp27a1, apoe, ldlr, mttp, cholesterol, cetp, abca1, lpl, triglycerides, diabetes	The biochemical and genetic diagnosis of lipid disorders.
pops_plus	33794741	20210402	18	lipa, tgfb1, pnpla2, lipid, pten, mlxipl, ppara, creb1, lepr, pnpla3, pparg, ppard, srebf1, fatty acid, cholesterol, nr1h4, nr1h3, lipids	The m√©nage √† trois of autophagy, lipid droplets and liver disease.
pops_plus	27135400	20160503	18	lipc, pcsk9, apob, lipid, abca1, ldlr, coronary, apoa1, cetp, angptl4, angptl3, lipids, cholesterol, artery, nr1h3, cardiovascular, triglycerides, coronary artery	Variants with large effects on blood lipids and the role of cholesterol and triglycerides in coronary disease.
pops_plus	19913121	20091117	18	heart, lipc, pcsk9, apob, lipid, pvrl2, mlxipl, abca1, apoe, ldlr, lpl, lipids, hmgcr, cholesterol, cetp, triglycerides, bcl3, cardiovascular	Gene-centric association signals for lipids and apolipoproteins identified via the HumanCVD BeadChip.
pops_plus	20160193	20100218	17	lipc, apob, lipid, abca1, lcat, triglyceride, apoa1, hyperlipidemia, lpl, angptl3, lipids, cholesterol, cetp, galnt2, triglycerides, dyslipidemias, trib1	Investigation of variants identified in caucasian genome-wide association studies for plasma high-density lipoprotein cholesterol and triglycerides levels in Mexican dyslipidemic study samples.
pops_plus	24423365	20140116	16	lipc, gpam, apob, lipid, atherosclerosis, irs1, cd36, park2, ldlr, lpl, tcf7l2, abca1, slc27a5, cardiovascular, apoa1, cobll1	The postprandial chylomicron triacylglycerol response to dietary fat in healthy male adults is significantly explained by a combination of single nucleotide polymorphisms in genes involved in triacylglycerol metabolism.
pops_plus	32252966	20200408	16	heart, lipc, apoe, cetp, lipid, add1, abcg1, coronary heart, gck, pon1, coronary, stroke, pltp, cholesterol, galnt2, cardiovascular	Sexually dimorphic DNA-methylation in cardiometabolic health: A systematic review.
pops_plus	21303902	20110210	16	abcg1, lipc, apoe, apob, lipg, lcat, abca1, pon1, cetp, lpl, trib1, cholesterol, fads1, nfkb1, apoa1, galnt2	Dense genotyping of candidate gene loci identifies variants associated with high-density lipoprotein cholesterol.
pops_plus	22001757	20111018	15	mical3, lipid, st3gal4, mlxipl, itga1, slc2a2, rora, pnpla3, abcb11, hnf1a, trib1, jmjd1c, fads1, atp8b1, ppp1r3b	Genome-wide association study identifies loci influencing concentrations of liver enzymes in plasma.
pops_plus	30326043	20181017	15	type 2 diabetes, pcsk9, lipid, triglyceride, coronary, coronary artery, angptl3, hmgcr, cholesterol, angptl4, artery, cardiovascular, lpl, triglycerides, diabetes	Association of Genetically Enhanced Lipoprotein Lipase-Mediated Lipolysis and Low-Density Lipoprotein Cholesterol-Lowering Alleles With Risk of Coronary Disease and Type 2 Diabetes.
pops_plus	26153245	20150709	15	abcg1, type 2 diabetes, lipid, scd, atherosclerosis, coronary, ldlr, coronary artery, mylip, cholesterol, fads1, artery, abca1, cardiovascular, diabetes	Alterations of a Cellular Cholesterol Metabolism Network Are a Molecular Feature of Obesity-Related Type 2 Diabetes and Cardiovascular Disease.
pops_plus	26546829	20151108	15	pcsk9, apob, lipid, abca1, triglyceride, apoe, ldlr, lpl, angptl3, cholesterol, angptl4, cardiovascular, ldlrap1, dyslipidemias, diabetes	Update on the molecular biology of dyslipidemias.
pops_plus	21862702	20110825	15	heart, pcsk9, apob, abcg5, coronary heart, coronary, ldlr, apoe, angptl3, lipids, hmgcr, sort1, ldlrap1, dyslipidemias, trib1	Mechanisms and genetic determinants regulating sterol absorption, circulating LDL levels, and sterol elimination: implications for classification and disease risk.
pops_plus	30270055	20181002	14	lipa, lipc, pcsk9, apob, abcg5, lipg, cyp27a1, met, ldlr, lpl, cholesterol, apoe, ldlrap1, lipid	Unusual genetic variants associated with hypercholesterolemia in Argentina.
pops_plus	33296900	20201209	14	lipc, apoe, cetp, lipg, cholesterol, pon1, ldlr, lpl, pltp, abca1, angptl4, cyp7a1, apoa1, galnt2	Quantile-Dependent Expressivity and Gene-Lifestyle Interactions Involving High-Density Lipoprotein Cholesterol.
pops_plus	29800275	20180526	14	heart, pcsk9, apob, lipid, coronary heart, trib1, coronary, ldlr, lpl, lipids, hmgcr, fads1, cetp, abcg5	From lipid locus to drug target through human genomics.
pops_plus	16763159	20060610	14	apoe, apob, lipid, abca1, coronary, apoa1, cetp, lpl, ppara, cholesterol, artery, cyp7a1, triglycerides, coronary artery	Consistent effects of genes involved in reverse cholesterol transport on plasma lipid and apolipoprotein levels in CARDIA participants.
pops_plus	19936222	20091126	14	lipc, apoe, apob, lipid, lipg, stag1, triglyceride, apoa1, jmjd1c, lpl, mylip, cholesterol, triglycerides, cardiovascular	Forty-three loci associated with plasma lipoprotein size, concentration, and cholesterol content in genome-wide analysis.
pops_plus	20112301	20100130	14	heart, lipid, akt1, irs1, triglyceride, cd36, coronary, pten, mttp, fatty acid, cholesterol, artery, triglycerides, coronary artery	Green tea polyphenols improve cardiac muscle mRNA and protein levels of signal pathways related to insulin and lipid metabolism and inflammation in insulin-resistant rats.
pops_plus	18193044	20080115	14	type 2 diabetes, coronary artery, mlxipl, coronary, angptl3, lipids, trib1, cholesterol, sort1, artery, cardiovascular, triglycerides, galnt2, diabetes	Six new loci associated with blood low-density lipoprotein cholesterol, high-density lipoprotein cholesterol or triglycerides in humans.
pops_plus	18230960	20080131	14	heart, type 2 diabetes, cetp, lipid, coronary heart, atherosclerosis, coronary, stroke, fatty acid, cholesterol, cardiovascular, diabetes, triglycerides, lipids	Optimal management of combined dyslipidemia: what have we behind statins monotherapy?
pops_plus	32101585	20200227	14	apoe, apob, triglyceride, tcf7l2, lepr, apoa1, mttp, abca1, sort1, cetp, angptl4, triglycerides, galnt2, lpl	Quantile-dependent expressivity of postprandial lipemia.
pops_plus	29083408	20171031	14	type 2 diabetes, cetp, lipid, angptl4, coronary, pnpla3, coronary artery, jak2, cholesterol, a1cf, artery, lpl, triglycerides, diabetes	Exome-wide association study of plasma lipids in &gt;300,000 individuals.
pops_plus	25470794	20141204	13	type 2 diabetes, apob, coronary artery, atherosclerosis, ldlr, triglyceride, coronary, cetp, lipids, cholesterol, artery, cardiovascular, diabetes	Genetic basis of dyslipidemia in disease precipitation of coronary artery disease (CAD) associated type 2 diabetes mellitus (T2DM).
pops_plus	31877157	20191227	13	apoa1, apob, coronary artery, lipc, coronary, hyperlipidemia, cetp, lpl, lipids, cholesterol, artery, triglycerides, diabetes	Associations of systemic, serum lipid and lipoprotein metabolic pathway gene variations with polypoidal choroidal vasculopathy in China.
pops_plus	28242176	20170301	13	pcsk9, lipid, triglyceride, coronary, hyperlipidemia, stroke, coronary artery, pad, fatty acid, cholesterol, artery, cardiovascular, diabetes	2017 Taiwan lipid guidelines for high risk patients.
pops_plus	12700893	20030418	13	heart, type 2 diabetes, apoe, apob, lipid, coronary heart, atherosclerosis, coronary, lipids, cholesterol, abca1, triglycerides, diabetes	The association of the R219K polymorphism in the ATP-binding cassette transporter 1 ( ABCA1) gene with coronary heart disease and hyperlipidaemia.
pops_plus	30369316	20181030	13	lipc, apoe, cetp, lipid, lipg, ppara, triglyceride, coronary, lpl, pltp, cholesterol, artery, coronary artery	Variants at the APOE /C1/C2/C4 Locus Modulate Cholesterol Efflux Capacity Independently of High-Density Lipoprotein Cholesterol.
pops_plus	34058468	20210531	13	heart, pcsk9, apob, lipid, coronary heart, triglyceride, coronary, hyperlipidemia, ldlr, apoe, cholesterol, dyslipidemias, cardiovascular	APOE gene variants in primary dyslipidemia.
pops_plus	19060906	20081209	13	mafb, timd4, hnf4a, lcat, triglyceride, hnf1a, pltp, cholesterol, fads1, fads3, angptl4, triglycerides, cardiovascular	Common variants at 30 loci contribute to polygenic dyslipidemia.
pops_plus	16973241	20060916	13	lipa, lrp1, cetp, vldlr, lrpap1, atherosclerosis, gsk3b, apoe, ldlr, srebf1, abca1, cholesterol, apoa1	Convergence of genes implicated in Alzheimer's disease on the cerebral cholesterol shuttle: APP, cholesterol, lipoproteins, and atherosclerosis.
pops_plus	20738247	20100827	13	heart, apoe, lipid, coronary heart, ppara, triglyceride, coronary, lpl, cholesterol, artery, cardiovascular, triglycerides, coronary artery	Triglyceride level affecting shared susceptibility genes in metabolic syndrome and coronary artery disease.
pops_plus	23505323	20130319	13	heart, lipc, cetp, lipid, mlxipl, coronary heart, abca1, coronary, lpl, lipids, cholesterol, triglycerides, dyslipidemias	Genomic study in Mexicans identifies a new locus for triglycerides and refines European lipid loci.
pops_plus	35213538	20220225	13	pcsk9, cetp, lipid, triglyceride, coronary, lpl, angptl3, hmgcr, cholesterol, angptl4, artery, triglycerides, coronary artery	Characterising metabolomic signatures of lipid-modifying therapies through drug target mendelian randomisation.
pops_plus	26582766	20151120	13	heart, lipc, apoe, cetp, lipid, lipg, hyperlipidemia, ldlr, lpl, lipids, abca1, apoa1, trib1	Genetic Susceptibility to Lipid Levels and Lipid Change Over Time and Risk of Incident Hyperlipidemia in Chinese Populations.
pops_plus	21860704	20110824	13	heart, pcsk9, apob, abcg5, coronary heart, coronary, ldlr, apoe, trib1, hmgcr, cholesterol, sort1, triglycerides	Implications of discoveries from genome-wide association studies in current cardiovascular practice.
pops_plus	25364765	20141104	13	heart, myb, tp53, tet2, pten, bad, cadm1, diabetes, stat3, bcl2, cardiovascular, fgfr2, fgfr1	Cardio-miRNAs and onco-miRNAs: circulating miRNA-based diagnostics for non-cancerous and cancerous diseases.
pops_plus	33202286	20201117	13	heart, pcsk9, lipid, coronary heart, atherosclerosis, ldlr, triglyceride, coronary, stroke, lipids, cholesterol, cardiovascular, diabetes	Kanglexin, a new anthraquinone compound, attenuates lipid accumulation by activating the AMPK/SREBP-2/PCSK9/LDLR signalling pathway.
pops_plus	22359512	20120224	13	type 2 diabetes, apoe, coronary artery, pdxdc1, lipc, coronary, lipids, fatty acid, fads1, artery, apoa1, sgpp1, diabetes	Genome-wide association study identifies novel loci associated with circulating phospho- and sphingolipid concentrations.
pops_plus	29260404	20171221	12	type 2 diabetes, pcsk9, lipid, atherosclerosis, coronary, coronary artery, cholesterol, artery, cardiovascular, triglycerides, dyslipidemias, diabetes	New treatment options for lipid-lowering therapy in subjects with type 2 diabetes.
pops_plus	28156151	20170204	12	heart, type 2 diabetes, pcsk9, lipid, atherosclerosis, coronary, coronary artery, cholesterol, artery, cardiovascular, triglycerides, diabetes	AMERICAN ASSOCIATION OF CLINICAL ENDOCRINOLOGISTS AND AMERICAN COLLEGE OF ENDOCRINOLOGY GUIDELINES FOR MANAGEMENT OF DYSLIPIDEMIA AND PREVENTION OF CARDIOVASCULAR DISEASE - EXECUTIVE SUMMARY<sub>Complete Appendix to Guidelines available at http://journals.aace.com</sub>.
pops_plus	28167353	20170208	12	pcsk9, apob, coronary artery, coronary, apoe, cetp, lpl, lipids, sort1, artery, smad3, lipid	Genetic risk analysis of coronary artery disease in Pakistani subjects using a genetic risk score of 21 variants.
pops_plus	33671529	20210306	12	lipc, apoe, apob, abcg5, abca1, lipid, lpl, cholesterol, cetp, cyp7a1, apoa1, cardiovascular	Common Genetic Variations Involved in the Inter-Individual Variability of Circulating Cholesterol Concentrations in Response to Diets: A Narrative Review of Recent Evidence.
pops_plus	32849290	20200828	12	lrp1, apoe, atherosclerosis, triglyceride, ldlr, lpl, angptl3, cholesterol, angptl4, artery, triglycerides, cardiovascular	Hypertriglyceridemia and Atherosclerosis: Using Human Research to Guide Mechanistic Studies in Animal Models.
pops_plus	27989886	20161220	12	abcg1, lipid, abca1, coronary, ldlr, coronary artery, fatty acid, cholesterol, fads1, artery, dhcr24, lipids	Intracoronary Imaging, Cholesterol Efflux, and Transcriptomes After Intensive¬†Statin¬†Treatment: The YELLOW II Study.
pops_plus	24520358	20140213	12	lrp1, lipid, vldlr, triglyceride, abca1, ldlr, apoe, lipids, hmgcr, cholesterol, apoa1, fatty acid	Fermentation of soy milk via Lactobacillus plantarum improves dysregulated lipid metabolism in rats on a high cholesterol diet.
pops_plus	23903499	20130802	12	heart, lipid, coronary heart, atherosclerosis, triglyceride, coronary, met, coronary artery, cholesterol, artery, cardiovascular, diabetes	Status of lipid management using lifestyle modification in Japanese adults: an analysis of the 2009 Japan Society of Ningen Dock database.
pops_plus	31184563	20190612	12	prdm16, cebpa, acads, lipid, nrip1, creb1, pparg, fabp4, gc, fatty acid, ppara, triglycerides	Autophagy inhibition prevents glucocorticoid-increased adiposity via suppressing BAT whitening.
pops_plus	24334872	20131217	12	lipc, cetp, coronary artery, lipg, abca1, lcat, coronary, lpl, pltp, cholesterol, artery, galnt2	Evaluation of links between high-density lipoprotein genetics, functionality, and aortic valve stenosis risk in humans.
pops_plus	22500948	20120417	12	heart, type 2 diabetes, apob, lipid, coronary heart, apoa1, coronary, hyperlipidemia, cholesterol, cardiovascular, triglycerides, diabetes	Consistency of extended-release niacin/laropiprant effects on Lp(a), ApoB, non-HDL-C, Apo A1, and ApoB/ApoA1 ratio across patient subgroups.
pops_plus	21792295	20110728	12	heart, type 2 diabetes, apob, lipid, coronary heart, atherosclerosis, coronary, coronary artery, cholesterol, artery, cardiovascular, diabetes	Primary prevention of coronary heart disease: integration of new data, evolving views, revised goals, and role of rosuvastatin in management. A comprehensive survey.
pops_plus	21252261	20110122	12	lrp1, cetp, lipid, atherosclerosis, pon1, apoh, coronary, apoe, lpl, cholesterol, artery, coronary artery	Association of anti-oxidized LDL and candidate genes with severity of coronary stenosis in the Women's Ischemia Syndrome Evaluation study.
pops_plus	29997226	20180713	12	heart, type 2 diabetes, pcsk9, lipid, coronary heart, atherosclerosis, coronary, hyperlipidemia, stroke, cholesterol, cardiovascular, diabetes	Large-Scale Phenome-Wide Association Study of <i>PCSK9</i> Variants Demonstrates Protection Against Ischemic Stroke.
pops_plus	23840542	20130711	12	abcg1, apoe, abcg5, atherosclerosis, ldlr, cd36, abca1, npc1, hmgcr, cholesterol, apoa1, cardiovascular	Dihydrocapsaicin Attenuates Plaque Formation through a PPARŒ≥/LXRŒ± Pathway in apoE(-/-) Mice Fed a High-Fat/High-Cholesterol Diet.
pops_plus	31442512	20190824	12	heart, pcsk9, coronary artery, atherosclerosis, triglyceride, coronary, hyperlipidemia, lipids, cholesterol, artery, cardiovascular, diabetes	An update on pharmacotherapies in diabetic dyslipidemia.
pops_plus	28128572	20170128	12	apoe, cetp, lipid, atherosclerosis, apoa1, ldlr, lpl, lipids, cholesterol, sort1, triglycerides, trib1	[Genetic determination of dyslipidemia - What tell us the results of¬†genome-wide association studies?]
pops_plus	35049039	20220120	12	heart, type 2 diabetes, apob, lipid, coronary heart, triglyceride, coronary, stroke, lipids, cholesterol, apoa1, diabetes	Lipid profile, lipid ratios, apolipoproteins, and risk of cardiometabolic multimorbidity in men: The Kuopio Ischaemic Heart Disease Risk Factor Study.
pops_plus	23221398	20121211	12	abcg1, pcsk9, lipid, vldlr, kit, ldlr, fatty acid, cholesterol, abca1, diabetes, triglycerides, lipids	Modulation of cholesterol transport by insulin-treated gestational diabetes mellitus in human full-term placenta.
pops_plus	19773416	20090924	12	lipc, pcsk9, apob, lipid, ldlr, apoe, cetp, lpl, hmgcr, abca1, artery, cardiovascular	A gene score of nine LDL and HDL regulating genes is associated with fluvastatin-induced cholesterol changes in women.
pops_plus	26946290	20160307	12	pcsk9, apob, coronary artery, coronary heart, aldh2, coronary, plg, cetp, hmgcr, cholesterol, artery, diabetes	Harnessing publicly available genetic data to prioritize lipid modifying therapeutic targets for prevention of coronary heart disease based on dysglycemic risk.
pops_plus	34233476	20210708	12	lipc, apob, lipid, abca1, coronary, cetp, coronary artery, cholesterol, artery, sidt2, apoa1, cardiovascular	Genome-Wide Association Study Identifies a Functional <i>SIDT2</i> Variant Associated With HDL-C (High-Density Lipoprotein Cholesterol) Levels and Premature Coronary Artery Disease.
pops_plus	28539666	20170526	12	pcsk9, cetp, lipid, coronary, apoe, ldlr, lpl, lipids, cholesterol, sort1, artery, coronary artery	Replication and fine-mapping of genetic predictors of lipid traits in African-Americans.
pops_plus	20864672	20100925	12	apoe, apob, lipid, ppp1r3b, aff1, lpl, mylip, lipids, trib1, cholesterol, triglycerides, coronary artery	Genetic variants influencing circulating lipid levels and risk of coronary artery disease.
pops_plus	30642114	20190116	12	type 2 diabetes, lrp1, srebf1, lipid, scd, triglyceride, rxra, pparg, lpl, ppara, diabetes, cardiovascular	Altered Adipose Tissue DNA Methylation Status in Metabolic Syndrome: Relationships Between Global DNA Methylation and Specific Methylation at Adipogenic, Lipid Metabolism and Inflammatory Candidate Genes and Metabolic Variables.
pops_plus	30893111	20190321	12	type 2 diabetes, coronary artery, atherosclerosis, triglyceride, coronary, lpl, angptl3, lipids, angptl4, artery, triglycerides, diabetes	New insights into angiopoietin-like proteins in lipid metabolism and cardiovascular disease risk.
pops_plus	14636288	20031126	12	type 2 diabetes, cetp, atherosclerosis, lcat, triglyceride, lpl, pltp, lipids, cholesterol, cardiovascular, triglycerides, diabetes	Alterations in high-density lipoprotein metabolism and reverse cholesterol transport in insulin resistance and type 2 diabetes mellitus: role of lipolytic enzymes, lecithin:cholesterol acyltransferase and lipid transfer proteins.
pops_plus	29222858	20171210	12	heart, apoe, apob, lipid, atherosclerosis, lcat, coronary, hyperlipidemia, cholesterol, artery, cardiovascular, coronary artery	Obesity, lipid profiles and oxidative stress in children after liver transplantation.
pops_plus	19800772	20091006	12	heart, apob, coronary artery, coronary heart, atherosclerosis, coronary, stroke, fatty acid, cholesterol, artery, cardiovascular, diabetes	Cardiovascular disease prevalence and its relation to risk factors in Alaska Eskimos.
pops_plus	19802338	20091006	12	lipc, pcsk9, apob, lipid, apoa1, ldlr, apoe, cholesterol, sort1, cetp, triglycerides, cardiovascular	Genetic loci associated with plasma concentration of low-density lipoprotein cholesterol, high-density lipoprotein cholesterol, triglycerides, apolipoprotein A1, and Apolipoprotein B among 6382 white women in genome-wide analysis with replication.
pops_plus	23584084	20130416	12	type 2 diabetes, apob, lipid, coronary, hyperlipidemia, coronary artery, fatty acid, cholesterol, artery, cardiovascular, triglycerides, diabetes	Dyslipidemia in obesity: mechanisms and potential targets.
pops_plus	24504152	20140208	12	abcg1, lipc, cetp, lipid, triglyceride, coronary, lpl, pltp, lipids, cholesterol, artery, coronary artery	Epipolymorphisms within lipoprotein genes contribute independently to plasma lipid levels in familial hypercholesterolemia.
pops_plus	23940067	20130814	12	abcg1, pcsk9, apob, lipid, abca1, triglyceride, lpl, lipids, cholesterol, cardiovascular, triglycerides, fatty acid	Recent advances in physiological lipoprotein metabolism.
pops_plus	24916532	20140612	12	heart, lipid, atherosclerosis, coronary, lpl, angptl3, trib1, cholesterol, artery, abca1, wwox, coronary artery	Genes associated with low serum high-density lipoprotein cholesterol.
pops_plus	9878681	19990108	12	heart, lipc, apoe, apob, lipid, coronary heart, coronary, ldlr, lipids, cholesterol, apoa1, diabetes	Ionizing radiation and genetic risks. VI. Chronic multifactorial diseases: a review of epidemiological and genetical aspects of coronary heart disease, essential hypertension and diabetes mellitus.
pops_plus	16458317	20060207	12	heart, apoe, lipid, coronary heart, atherosclerosis, lcat, triglyceride, coronary, lpl, fatty acid, cholesterol, artery	Modulation of lipoprotein metabolism by inhibition of sphingomyelin synthesis in ApoE knockout mice.
pops_plus	21232242	20110115	12	heart, cetp, lipid, coronary heart, atherosclerosis, triglyceride, coronary, lipids, cholesterol, artery, triglycerides, coronary artery	Cholesteryl ester transfer protein's role in high-density lipoprotein metabolism Insights from studies with transgenic mice.
pops_plus	23063622	20121016	12	brca2, lipid, gck, serpinf2, apoh, pparg, insr, lipids, cholesterol, gata4, triglycerides, vldlr	Large-scale gene-centric meta-analysis across 32 studies identifies multiple lipid loci.
pops_plus	23825924	20130705	12	pck1, lipid, ppara, scd, acox1, rxra, cd36, nrip1, ppard, med1, fatty acid, cholesterol	Dietary Lipid During Late-Pregnancy and Early-Lactation to Manipulate Metabolic and Inflammatory Gene Network Expression in Dairy Cattle Liver with a Focus on PPARs.
pops_plus	24871327	20140530	12	heart, lipid, lipg, atherosclerosis, triglyceride, abca1, lpl, fatty acid, cholesterol, angptl4, wwox, triglycerides	The WWOX gene modulates high-density lipoprotein and lipid metabolism.
pops_plus	28437620	20170425	12	heart, type 2 diabetes, pcsk9, lipid, atherosclerosis, coronary, coronary artery, cholesterol, artery, cardiovascular, triglycerides, diabetes	AMERICAN ASSOCIATION OF CLINICAL ENDOCRINOLOGISTS AND AMERICAN COLLEGE OF ENDOCRINOLOGY GUIDELINES FOR MANAGEMENT OF DYSLIPIDEMIA AND PREVENTION OF CARDIOVASCULAR DISEASE.
pops_plus	17227233	20070118	12	heart, type 2 diabetes, apob, lipid, coronary heart, triglyceride, coronary, coronary artery, cholesterol, artery, cardiovascular, diabetes	MTP inhibition as a treatment for dyslipidaemias: time to deliver or empty promises?
pops_plus	30602199	20190103	12	heart, apoe, apob, lipid, coronary, lipids, cholesterol, tf, artery, cardiovascular, triglycerides, coronary artery	Apolipoprotein C-III Strongly Correlates with Activated Factor VII-Anti-Thrombin Complex: An Additional Link between Plasma Lipids and Coagulation.
pops_plus	34799335	20211120	11	heart, apoe, lipid, coronary heart, triglyceride, coronary, lipids, hmgcr, cholesterol, artery, coronary artery	SNP of HMGCR and Apo E genes and their impact in response to statin therapy in hypercholesterolemic and hypertriglyceridemic patients in Pakistan.
pops_plus	34802986	20211122	11	heart, apob, lipid, coronary heart, triglyceride, coronary, stroke, lipids, cholesterol, triglycerides, cardiovascular	Lipid measurements in the management of cardiovascular diseases: Practical recommendations a scientific statement from the national lipid association writing group.
pops_plus	21300955	20110209	11	heart, irf1, ppp1r3b, coronary heart, hnf4a, pabpc4, rora, lepr, hnf1a, coronary, cardiovascular	Meta-analysis of genome-wide association studies in &gt;80 000 subjects identifies multiple loci for C-reactive protein levels.
pops_plus	27419905	20160716	11	heart, lipid, coronary heart, atherosclerosis, coronary, met, stroke, pad, cholesterol, cardiovascular, diabetes	Low-density lipoprotein cholesterol levels and lipid-modifying therapy prescription patterns in the real world: An analysis of more than 33,000 high cardiovascular risk patients in Japan.
pops_plus	32595194	20200630	11	apoe, apob, lipid, atherosclerosis, coronary, apoa1, fatty acid, cholesterol, artery, triglycerides, coronary artery	Relationships of Fatty Acids, Delta-5 Desaturase Activity, and Lipid Profiles in Men with Acute Coronary Syndrome.
pops_plus	24981077	20140702	11	pdxdc1, mlxipl, ptpn11, macf1, irs1, lpl, trib1, diabetes, cardiovascular, atxn2, cobll1	Pleiotropic genes for metabolic syndrome and inflammation.
pops_plus	11768156	20020105	11	heart, apob, lipid, coronary heart, triglyceride, coronary, lpl, lipids, cholesterol, triglycerides, diabetes	Postprandial triglyceride-rich lipoprotein metabolism and insulin sensitivity in nonalcoholic steatohepatitis patients.
pops_plus	33351885	20201222	11	heart, type 2 diabetes, lipid, coronary heart, coronary, lpl, angptl3, angptl4, cardiovascular, triglycerides, diabetes	Metabolic profiling of angiopoietin-like protein 3 and 4 inhibition: a drug-target Mendelian randomization analysis.
pops_plus	25606439	20150122	11	cetp, lipid, mlxipl, atherosclerosis, triglyceride, coronary, cholesterol, artery, triglycerides, dyslipidemias, coronary artery	Association between CETP, MLXIPL, and TOMM40 polymorphisms and serum lipid levels in a Latvian population.
pops_plus	19702114	20090826	11	heart, cetp, lipid, coronary heart, atherosclerosis, lcat, triglyceride, coronary, cholesterol, triglycerides, cardiovascular	[Vascular inflammation: effect of proatherogenic dyslipidemic trio or quartet].
pops_plus	25261854	20140928	11	apoe, cetp, coronary artery, lcat, atherosclerosis, pon1, coronary, lipids, artery, cardiovascular, lipid	Paraoxonase 1 and HDL maturation.
pops_plus	30307737	20181012	11	heart, coronary heart, coronary, met, stroke, fatty acid, cholesterol, cardiovascular, diabetes, triglycerides, lipids	Omega-3 Fatty Acids and Cardiovascular Disease: An Updated Systematic Review.
pops_plus	33814236	20210405	11	heart, apob, lipid, atherosclerosis, apoa1, stroke, lipids, cholesterol, cardiovascular, triglycerides, diabetes	Causal effects of plasma lipids on the risk of atrial fibrillation: A multivariable mendelian randomization study.
pops_plus	33810964	20210403	11	apoe, apob, lipid, atherosclerosis, coronary, coronary artery, lipids, cholesterol, sort1, artery, diabetes	rs629301 CELSR2 polymorphism confers a ten-year equivalent risk of critical stenosis assessed by coronary angiography.
pops_plus	30975109	20190413	11	pcsk9, lipid, atherosclerosis, coronary, ldlr, apoe, abcg5, cholesterol, artery, ldlrap1, coronary artery	Heterozygous familial hypercholesterolaemia in a pair of identical twins: a case report and updated review.
pops_plus	11258203	20010322	11	heart, type 2 diabetes, lipid, coronary, met, stroke, coronary artery, cholesterol, artery, cardiovascular, diabetes	Rationale and design of the LURIC study--a resource for functional genomics, pharmacogenomics and long-term prognosis of cardiovascular disease.
pops_plus	18221422	20080129	11	heart, apob, lipid, coronary heart, atherosclerosis, coronary, lipids, cholesterol, cardiovascular, triglycerides, diabetes	Glycemic control in adolescents with type 1 diabetes mellitus improves lipid serum levels and oxidative stress.
pops_plus	33580780	20210213	11	heart, lipid, coronary heart, atherosclerosis, triglyceride, coronary, stroke, angptl3, cholesterol, triglycerides, cardiovascular	Triglyceride-rich lipoproteins, apolipoprotein C-III, angiopoietin-like protein 3, and cardiovascular events in older adults: Atherosclerosis Risk in Communities (ARIC) study.
pops_plus	18607186	20080709	11	abcg1, lipc, apom, cetp, lipg, atherosclerosis, lcat, pltp, abca1, apoa1, galnt2	The value of HDL genetics.
pops_plus	24640662	20140320	11	heart, type 2 diabetes, lipid, coronary heart, triglyceride, coronary, bad, cholesterol, cardiovascular, triglycerides, diabetes	[Relationships between serum lipid composition and acetylator status as markers of energy metabolism in women with coronary heart disease, metabolic syndrome, and type 2 diabetes mellitus].
pops_plus	29275178	20171225	11	acox1, lipid, scd, abca1, ldlr, triglyceride, abcb11, lipids, cholesterol, cyp7a1, diabetes	Central administration of coagonist of GLP-1 and glucagon receptors improves dyslipidemia.
pops_plus	20360902	20100403	11	heart, type 2 diabetes, apob, coronary artery, coronary heart, apom, coronary, cholesterol, artery, triglycerides, diabetes	Determination of single-nucleotide polymorphism in the proximal promoter region of apolipoprotein M gene in coronary artery diseases.
pops_plus	21262584	20110126	11	heart, lipid, coronary heart, atherosclerosis, type ii diabetes, cd36, coronary, fatty acid, cholesterol, cardiovascular, diabetes	The macrophage Ox-LDL receptor, CD36 and its association with type II diabetes mellitus.
pops_plus	34367063	20210809	11	heart, type 2 diabetes, lipid, coronary heart, coronary, met, stroke, lipids, cholesterol, cardiovascular, diabetes	Cardiovascular Risk Factor Status in Hospitalized Patients With Type 2 Diabetes in China.
pops_plus	34370653	20210809	11	heart, apob, lipid, triglyceride, apoa1, hyperlipidemia, ldlr, fatty acid, cholesterol, cyp7a1, triglycerides	Antihyperlipidemic and Hepatoprotective Properties of Vitamin B6 Supplementation in Rats with High-Fat Diet-Induced Hyperlipidemia.
pops_plus	23861364	20130718	11	lipc, cetp, lipid, triglyceride, met, lipids, cholesterol, cardiovascular, diabetes, triglycerides, fatty acid	Do genetic modifiers of high-density lipoprotein cholesterol and triglyceride levels also modify their response to a lifestyle intervention in the setting of obesity and type-2 diabetes mellitus?: The Action for Health in Diabetes (Look AHEAD) study.
pops_plus	17487761	20070510	11	heart, lipid, coronary heart, coronary, met, pad, lipids, cholesterol, artery, triglycerides, diabetes	Diagnosis and treatment of dyslipidemia are neglected in patients with peripheral artery disease.
pops_plus	14557872	20031015	11	tgfb1, f2, coronary artery, lrpap1, coronary heart, lipc, coronary, ldlr, cholesterol, artery, triglycerides	Evidence for substantial effect modification by gender in a large-scale genetic association study of the metabolic syndrome among coronary heart disease patients.
pops_plus	29162602	20171123	11	heart, pcsk9, apob, coronary artery, coronary heart, atherosclerosis, coronary, ldlr, apoe, cholesterol, artery	Rosuvastatin Reduces Aortic Sinus and Coronary Artery Atherosclerosis in SR-B1 (Scavenger Receptor Class B Type 1)/ApoE (Apolipoprotein E) Double Knockout Mice Independently of Plasma Cholesterol Lowering.
pops_plus	11034934	20001018	11	heart, apoe, apob, coronary heart, atherosclerosis, triglyceride, coronary, lipids, cholesterol, triglycerides, cardiovascular	VLDL, apolipoproteins B, CIII, and E, and risk of recurrent coronary events in the Cholesterol and Recurrent Events (CARE) trial.
pops_plus	14651331	20031204	11	type 2 diabetes, cetp, atherosclerosis, lcat, triglyceride, lpl, lipids, cholesterol, cardiovascular, triglycerides, diabetes	Role of lipases, lecithin:cholesterol acyltransferase and cholesteryl ester transfer protein in abnormal high density lipoprotein metabolism in insulin resistance and type 2 diabetes mellitus.
pops_plus	31883481	20191229	11	pcsk9, apob, coronary artery, atherosclerosis, coronary, ldlr, apoe, cholesterol, artery, dyslipidemias, lipid	Familial hypercholesterolemia: A complex genetic disease with variable phenotypes.
pops_plus	30526649	20181212	11	lipa, pcsk9, apob, coronary artery, abcg5, coronary, ldlr, apoe, artery, ldlrap1, lipid	Application of expanded genetic analysis in the diagnosis of familial hypercholesterolemia in patients with very early-onset coronary artery disease.
pops_plus	19776697	20090925	11	heart, type 2 diabetes, lipid, coronary heart, coronary, met, stroke, cholesterol, cardiovascular, triglycerides, diabetes	Characteristics of patients with type 2 diabetes of short duration in Poland: Rationale, design and preliminary results of the ARETAEUS1 study.
pops_plus	15946668	20050611	11	heart, apoe, lipid, coronary heart, atherosclerosis, coronary, ldlr, fatty acid, cholesterol, triglycerides, lipids	Contrasting effect of fish oil supplementation on the development of atherosclerosis in murine models.
pops_plus	8499407	19930601	11	heart, apob, lipid, coronary heart, atherosclerosis, coronary, fatty acid, cholesterol, artery, triglycerides, coronary artery	Childhood consumption of dietary polyunsaturated fat lowers risk for coronary artery atherosclerosis in African green monkeys.
pops_plus	30694319	20190130	11	heart, apob, lipid, coronary heart, triglyceride, coronary, ldlr, lpl, cholesterol, triglycerides, cardiovascular	Association of Triglyceride-Lowering LPL Variants and LDL-C-Lowering LDLR Variants With Risk of Coronary Heart Disease.
pops_plus	34754293	20211110	11	heart, lipid, coronary heart, coronary, hyperlipidemia, stroke, cholesterol, cardiovascular, triglycerides, ahr, diabetes	The association of cardiovascular mortality with a first-degree family member history of different cardiovascular diseases.
pops_plus	30828113	20190305	11	heart, pcsk9, coronary artery, coronary heart, atherosclerosis, coronary, lipid, lipids, artery, cardiovascular, diabetes	Lipids in Children and Links to Adult Vascular Disease.
pops_plus	33996937	20210517	11	heart, pcsk9, lipid, coronary heart, atherosclerosis, triglyceride, coronary, hyperlipidemia, fatty acid, cholesterol, cardiovascular	Mechanisms of Atherosclerosis Induced by Postprandial Lipemia.
pops_plus	22963620	20120912	11	heart, pcsk9, apob, lipid, coronary heart, triglyceride, coronary, ldlr, cholesterol, triglycerides, dyslipidemias	New clinical perspectives of hypolipidemic drug therapy in severe hypercholesterolemia.
pops_plus	25562618	20150107	11	apoe, lipid, atherosclerosis, lcat, triglyceride, abca1, ldlr, lipids, cholesterol, cyp7a1, cardiovascular	Anti-atherosclerotic and anti-inflammatory actions of sesame oil.
pops_plus	24722249	20140412	11	apoe, apob, lipid, timd4, mlxipl, triglyceride, pltp, lipids, cetp, cyp7a1, diabetes	Pleiotropic effects of lipid genes on plasma glucose, HbA1c, and HOMA-IR levels.
pops_plus	19491209	20090604	11	heart, type 2 diabetes, apob, coronary artery, atherosclerosis, triglyceride, coronary, cholesterol, artery, cardiovascular, diabetes	Apolipoprotein B but not LDL cholesterol is associated with coronary artery calcification in type 2 diabetic whites.
pops_plus	29074585	20171028	11	heart, type 2 diabetes, lipid, atherosclerosis, coronary, ldlr, coronary artery, fatty acid, fads1, artery, diabetes	Œî-5 Fatty Acid Desaturase <i>FADS1</i> Impacts Metabolic Disease by Balancing Proinflammatory and Proresolving Lipid Mediators.
pops_plus	26690388	20151223	11	pcsk9, cetp, lipid, coronary, pnpla3, ldlr, lipids, cholesterol, artery, triglycerides, coronary artery	Exome-wide association analysis reveals novel coding sequence variants associated with lipid traits in Chinese.
pops_plus	14729390	20040120	11	apob, coronary artery, atherosclerosis, type ii diabetes, coronary, cetp, cholesterol, artery, cardiovascular, dyslipidemias, diabetes	Pharmacological modulation of cholesteryl ester transfer protein, a new therapeutic target in atherogenic dyslipidemia.
pops_plus	26780889	20160120	11	lipc, apob, lipid, fn1, abca1, lpl, lipids, cholesterol, cetp, triglycerides, trib1	Meta-analysis of lipid-traits in Hispanics identifies novel loci, population-specific effects, and tissue-specific enrichment of eQTLs.
pops_plus	25758596	20150312	11	apoe, lcat, atherosclerosis, pon1, hyperlipidemia, ldlr, lipids, hmgcr, cholesterol, cyp7a1, apoa1	Anthocyanin-rich black elderberry extract improves markers of HDL function and reduces aortic cholesterol in hyperlipidemic mice.
pops_plus	32563265	20200622	11	lipids, apob, lipid, abca1, apoa1, ldlr, fatty acid, hmgcr, cholesterol, triglycerides, cardiovascular	Ethanol-mediated upregulation of APOA1 gene expression in HepG2 cells is independent of de novo lipid biosynthesis.
pops_plus	22118082	20111129	11	cebpa, ncoa1, lipid, mlxipl, scd, rxra, nrip1, med1, fatty acid, nfkb1, ep300	Dietary lipid during the transition period to manipulate subcutaneous adipose tissue peroxisome proliferator-activated receptor-Œ≥ co-regulator and target gene expression.
pops_plus	28984832	20171007	11	abcg1, apoe, cetp, abcg5, atherosclerosis, abca1, ldlr, fatty acid, cholesterol, cyp7a1, cardiovascular	The Role of Omega-3 Fatty Acids in Reverse Cholesterol Transport: A Review.
pops_plus	16770077	20060614	11	lipc, apoe, cetp, lipid, cholesterol, lcat, ldlr, lpl, pltp, abca1, apoa1	Concordant association of lipid gene variation with a combined HDL/LDL-cholesterol phenotype in two European populations.
pops_plus	31317009	20190719	11	apob, lipid, abca1, lcat, triglyceride, hyperlipidemia, ldlr, lipids, cholesterol, apoa1, fatty acid	Xuezhitong capsule, an extract of <i>Allium macrostemon Bunge</i>, exhibits reverse cholesterol transport and accompanies high-density lipoprotein levels to protect against hyperlipidemia in ApoE<sup>-/-</sup> mice.
pops_plus	25839937	20150404	11	heart, pcsk9, apob, apoe, coronary heart, abca1, coronary, ldlr, lpl, cholesterol, ldlrap1	Next generation sequencing to identify novel genetic variants causative of autosomal dominant familial hypercholesterolemia associated with increased risk of coronary heart disease.
pops_plus	18669160	20080802	11	type 2 diabetes, lipid, sod1, atherosclerosis, irf1, coronary, fatty acid, cholesterol, cardiovascular, triglycerides, diabetes	Relations between metabolic syndrome, oxidative stress and inflammation and cardiovascular disease.
pops_plus	16574234	20060401	11	heart, type 2 diabetes, cetp, lipid, coronary heart, atherosclerosis, coronary, cholesterol, cardiovascular, dyslipidemias, diabetes	Therapeutic elevation of HDL-cholesterol to prevent atherosclerosis and coronary heart disease.
pops_plus	23583468	20130416	11	heart, type 2 diabetes, apoe, coronary heart, ppara, coronary, hyperlipidemia, pparg, lipids, cholesterol, diabetes	Different effects of PPARA, PPARG and ApoE SNPs on serum lipids in patients with coronary heart disease based on the presence of diabetes.
pops_plus	33028190	20201008	11	lipa, abcg1, pcsk9, srebf1, lipid, lrp1, fatty acid, cholesterol, angptl4, triglycerides, lipids	DNA methylation microarrays identify epigenetically regulated lipid related genes in obese patients with hypercholesterolemia.
pops_plus	23736950	20130606	11	type 2 diabetes, coronary artery, bad, coronary, stroke, pad, lipids, cholesterol, artery, cardiovascular, diabetes	Increased consumption of fruit and vegetables for the primary prevention of cardiovascular diseases.
pops_plus	25728840	20150303	11	heart, sp1, apoe, lipid, coronary heart, atherosclerosis, triglyceride, coronary, cholesterol, artery, coronary artery	MiR-320a contributes to atherogenesis by augmenting multiple risk factors and down-regulating SRF.
pops_plus	32440963	20200523	11	lipid, atherosclerosis, triglyceride, coronary, hyperlipidemia, angptl4, angptl3, cholesterol, artery, cardiovascular, coronary artery	The Clinical Role of Angiopoietin-Like Protein 3 in Evaluating Coronary Artery Disease in Patients with Obstructive Sleep Apnea.
pops_plus	32442027	20200523	11	heart, apob, lipid, coronary heart, atherosclerosis, coronary, apoa1, lipids, cholesterol, triglycerides, cardiovascular	The effects of exercise training on lipid metabolism and coronary heart disease.
pops_plus	33341055	20201219	11	pcsk9, srebf1, lipid, scd, atherosclerosis, apoe, gpam, fatty acid, hmgcr, cholesterol, lipids	Salidroside simultaneously reduces de novo lipogenesis and cholesterol biosynthesis to attenuate atherosclerosis in mice.
pops_plus	17319473	20070227	11	heart, apob, lipid, coronary heart, triglyceride, coronary, apoa1, lipids, cholesterol, triglycerides, diabetes	Evaluation of efficacy and safety of fixed dose lovastatin and niacin(ER) combination in asian Indian dyslipidemic patients: a multicentric study.
pops_plus	17700364	20070819	11	lipc, apoe, cetp, lipid, lipg, abca1, triglyceride, lpl, lipids, cholesterol, cardiovascular	Contribution of 20 single nucleotide polymorphisms of 13 genes to dyslipidemia associated with antiretroviral therapy.
pops_plus	25811180	20150327	11	pcsk9, apob, coronary artery, triglyceride, coronary, ldlr, mttp, trib1, cholesterol, artery, triglycerides	Modulators of hepatic lipoprotein metabolism identified in a search for small-molecule inducers of tribbles pseudokinase 1 expression.
pops_plus	25814643	20150328	11	heart, type 2 diabetes, lipid, pvrl2, coronary, fads1, lpl, cardiovascular, artery, diabetes, coronary artery	Genetic Variations in MicroRNA-Binding Sites Affect MicroRNA-Mediated Regulation of Several Genes Associated With Cardio-metabolic Phenotypes.
pops_plus	23991091	20130831	11	type 2 diabetes, pck1, lipid, cebpa, cd36, fabp4, lpl, fatty acid, cholesterol, nr1h3, diabetes	MiR-155 has a protective role in the development of non-alcoholic hepatosteatosis in mice.
pops_plus	32373157	20200507	11	pcsk9, coronary artery, fn1, coronary, plg, lpl, col4a2, smad3, artery, flt1, lipid	The Integrated Landscape of Biological Candidate Causal Genes in Coronary Artery Disease.
pops_plus	32375652	20200508	11	lipid, atherosclerosis, coronary, ldlr, lpl, hmgcr, cholesterol, artery, abca1, dhcr24, coronary artery	Identification of foam cell biomarkers by microarray analysis.
pops_plus	23496836	20130319	11	heart, type 2 diabetes, lipid, coronary heart, triglyceride, coronary, scd, fatty acid, cholesterol, triglycerides, diabetes	Ethnic variation in the activity of lipid desaturases and their relationships with cardiovascular risk factors in control women and an at-risk group with previous gestational diabetes mellitus: a cross-sectional study.
pops_plus	34080258	20210603	11	abcg1, lipid, coronary heart, abca1, triglyceride, coronary, lipids, cholesterol, artery, apoa1, coronary artery	A calorie-restricted diet with nuts favourably raises plasma high-density lipoprotein-cholesterol in overweight and obese patients with stable coronary heart disease: A randomised controlled trial.
pops_plus	17704557	20070821	11	type 2 diabetes, lipid, atherosclerosis, pon1, type ii diabetes, coronary, coronary artery, lipids, cholesterol, artery, diabetes	Paraoxonase (PON1) activity in north west Indian Punjabis with coronary artery disease &amp; type 2 diabetes mellitus.
pops_plus	32161301	20200313	11	pcsk9, apob, apoe, triglyceride, aldh2, apoa1, pnpla3, lpl, cetp, myb, triglycerides	Gene-environment interactions due to quantile-specific heritability of triglyceride and VLDL concentrations.
pops_plus	30953636	20190407	11	pcsk9, apob, coronary artery, atherosclerosis, coronary, ldlr, lipids, cholesterol, artery, triglycerides, cardiovascular	Keep recycling going: New approaches to reduce LDL-C.
pops_plus	15030794	20040320	11	heart, lipid, scd, coronary, coronary artery, fatty acid, cholesterol, artery, cardiovascular, triglycerides, diabetes	The role of stearoyl-CoA desaturase in body weight regulation.
pops_plus	19689798	20090820	11	nfat5, igf1, lipid, scd, atherosclerosis, cd36, ldlr, ebf1, abca1, fads1, diabetes	Isomer-specific effects of CLA on gene expression in human adipose tissue depending on PPARgamma2 P12A polymorphism: a double blind, randomized, controlled cross-over study.
pops_plus	31979197	20200126	11	heart, coronary artery, atherosclerosis, triglyceride, cd36, coronary, fabp4, lpl, fatty acid, artery, lipids	The Gene and Protein Expression of the Main Components of the Lipolytic System in Human Myocardium and Heart Perivascular Adipose Tissue. Effect of Coronary Atherosclerosis.
pops_plus	29976289	20180707	11	heart, apoe, coronary heart, atherosclerosis, triglyceride, coronary, stroke, lipids, cholesterol, triglycerides, cardiovascular	Remnant-Like Particle Cholesterol, Low-Density Lipoprotein Triglycerides, and Incident Cardiovascular Disease.
pops_plus	21386085	20110310	11	type 2 diabetes, cetp, lipid, lipc, abcb11, lpl, trib1, cholesterol, diabetes, triglycerides, cardiovascular	A bivariate genome-wide approach to metabolic syndrome: STAMPEED consortium.
pops_plus	30413934	20181111	11	type 2 diabetes, apoe, lipid, coronary, coronary artery, lipids, cholesterol, artery, cardiovascular, triglycerides, diabetes	Dissecting the genetic relationship between cardiovascular risk factors and Alzheimer's disease.
pops_plus	31893465	20200102	11	lipa, pcsk9, apob, lipid, abcg5, met, ldlr, apoe, cholesterol, ldlrap1, cardiovascular	The familial hypercholesterolaemia phenotype: Monogenic familial hypercholesterolaemia, polygenic hypercholesterolaemia and other causes.
pops_plus	33561811	20210209	11	f2, lipid, cholesterol, triglyceride, cd36, abca1, abcb11, apoh, lipc, fabp1, triglycerides	Gene networks and pathways for plasma lipid traits via multitissue multiomics systems analysis.
pops_plus	33536383	20210204	11	abcg1, apoe, lipid, atherosclerosis, coronary, ldlr, cholesterol, artery, abca1, apoa1, coronary artery	MicroRNA-320b Modulates Cholesterol Efflux and Atherosclerosis.
pops_plus	19558527	20090630	11	lipc, lipid, atherosclerosis, triglyceride, coronary, coronary artery, lipids, cholesterol, artery, cardiovascular, diabetes	Hepatic lipase promoter C-480T polymorphism is associated with serum lipids levels, but not subclinical atherosclerosis: the Cardiovascular Risk in Young Finns Study.
pops_plus	30740535	20190214	11	serpina1, pcsk9, apob, lipid, coronary, apoe, cetp, lpl, cholesterol, artery, coronary artery	Coronary artery disease, genetic risk and the metabolome in young individuals.
pops_plus	30740535	20190212	11	serpina1, pcsk9, apob, lipid, coronary, apoe, cetp, lpl, cholesterol, artery, coronary artery	Coronary artery disease, genetic risk and the metabolome in young individuals.
pops_plus	24751931	20140423	11	pcsk9, apob, lipid, atherosclerosis, triglyceride, coronary, angptl3, cholesterol, artery, cardiovascular, coronary artery	Hypobetalipoproteinemia and abetalipoproteinemia.
pops_plus	28117839	20170125	11	type 2 diabetes, igf1, lipid, gsk3b, tcf7l2, coronary, apoe, cardiovascular, artery, diabetes, coronary artery	The genetic overlap between mood disorders and cardiometabolic diseases: a systematic review of genome wide and candidate gene studies.
pops_plus	21804106	20110802	11	heart, lipid, coronary heart, coronary, lpl, angptl3, lipids, cholesterol, sort1, smad3, triglycerides	Comparative analysis of genome-wide association studies signals for lipids, diabetes, and coronary heart disease: Cardiovascular Biomarker Genetics Collaboration.
pops_plus	23074395	20121018	11	heart, coronary heart, atherosclerosis, por, coronary, hyperlipidemia, stroke, pad, artery, cardiovascular, diabetes	Stenting for peripheral artery disease of the lower extremities: an evidence-based analysis.
pops_plus	23050023	20121011	11	apoe, apob, lipid, ldlr, coronary, cetp, cholesterol, sort1, artery, triglycerides, coronary artery	Association of genetic variants influencing lipid levels with coronary artery disease in Japanese individuals.
pops_plus	27578127	20160901	11	heart, pcsk9, apob, lipid, coronary heart, atherosclerosis, coronary, ldlr, apoe, angptl3, cholesterol	Phenotypic variability in 4 homozygous familial hypercholesterolemia siblings compound heterozygous for LDLR mutations.
pops_plus	33569482	20210211	11	heart, lipid, coronary heart, ldlr, coronary, hyperlipidemia, stroke, cholesterol, artery, cardiovascular, coronary artery	Identifying familial hypercholesterolemia in an early onset ischemic cerebrovascular disease patient and the cascade screening in the pedigree: a case report.
pops_plus	31884941	20191231	11	heart, type 2 diabetes, apob, atherosclerosis, coronary, apoa1, lipids, cholesterol, cardiovascular, triglycerides, diabetes	[An exploration of potential approaches to improve the diagnosis of subclinical atherosclerosis in patients with high cardiovascular risk].
pops_plus	35246549	20220305	11	pcsk9, apob, coronary artery, coronary, tf, ldlr, apoe, sort1, artery, flt1, diabetes	In silico identification of single nucleotide variations at CpG sites regulating CpG island existence and size.
pops_plus	21645898	20110608	11	apob, lipid, atherosclerosis, ldlr, triglyceride, abca1, stroke, mttp, fatty acid, cholesterol, apoa1	Identification of a gene variant in the master regulator of lipid metabolism SREBP-1 in a family with a novel form of severe combined hypolipidemia.
pops_plus	26370207	20150916	11	pcsk9, lipid, atherosclerosis, triglyceride, coronary, ldlr, coronary artery, cholesterol, artery, cardiovascular, diabetes	Challenges in the Diagnosis and Treatment of Homozygous Familial Hypercholesterolemia.
pops_plus	31055921	20190507	11	abcg1, pcsk9, lipid, triglyceride, hyperlipidemia, ldlr, pad, lipids, cholesterol, cyp7a1, abcg5	Fucoidan A2 from the Brown Seaweed Ascophyllum nodosum Lowers Lipid by Improving Reverse Cholesterol Transport in C57BL/6J Mice Fed a High-Fat Diet.
pops_plus	29879686	20180608	11	heart, apoe, coronary artery, atherosclerosis, coronary, lipids, cholesterol, artery, cardiovascular, triglycerides, diabetes	Evidence of extensive atherosclerosis, coronary artery disease and myocardial infarction in the ApoE<sup>-/-</sup>:Ins2<sup>+/Akita</sup> mouse fed a western diet.
pops_plus	15325833	20040825	11	heart, type 2 diabetes, lipid, coronary heart, triglyceride, coronary, met, stroke, cholesterol, cardiovascular, diabetes	Primary prevention of cardiovascular disease with atorvastatin in type 2 diabetes in the Collaborative Atorvastatin Diabetes Study (CARDS): multicentre randomised placebo-controlled trial.
pops_plus	15580057	20041208	11	heart, coronary heart, hp, atherosclerosis, coronary, stroke, lipids, cholesterol, cardiovascular, triglycerides, diabetes	Helicobacter pylori and hepatitis A virus infections and the cardiovascular risk profile in patients with diabetes mellitus: results of a population-based study.
pops_plus	30674322	20190125	11	type 2 diabetes, pcsk9, coronary artery, atherosclerosis, irs1, coronary, akt1, insr, artery, lepr, diabetes	Serum protein signature of coronary artery disease in type 2 diabetes mellitus.
pops_plus	32345202	20200430	11	heart, type 2 diabetes, apob, atherosclerosis, coronary, apoa1, lipids, cholesterol, cardiovascular, triglycerides, diabetes	[Prediction of Subclinical Coronary Atherosclerosis in Patients with High and Very High Cardiovascular Risk].
pops_plus	1947727	19910901	11	apoe, apob, coronary artery, coronary heart, coronary, lipids, cholesterol, artery, cardiovascular, triglycerides, diabetes	Apolipoprotein E phenotypes, serum lipoproteins and apolipoproteins in angiographically assessed coronary heart disease.
pops_plus	23406852	20130215	11	heart, pcsk9, lipid, coronary heart, atherosclerosis, triglyceride, coronary, hyperlipidemia, abcg5, cholesterol, cardiovascular	[Targets of anti-hyperlipidemia drugs].
pops_plus	27701660	20161005	11	type 2 diabetes, pcsk9, lipid, abcg5, coronary, ldlr, coronary artery, hmgcr, cholesterol, artery, diabetes	Association Between Low-Density Lipoprotein Cholesterol-Lowering Genetic Variants and Risk of Type 2 Diabetes: A Meta-analysis.
pops_plus	34012307	20210520	10	heart, type 2 diabetes, coronary heart, triglyceride, coronary, ahr, stroke, pad, diabetes, cardiovascular	Incidence and Predictors of Cardiovascular Disease among Type 1 and Type 2 Diabetes Mellitus in a Tertiary Health Care Setting of Ethiopia: 8-Year Retrospective Follow-Up Study.
pops_plus	34834523	20211127	10	pcsk9, cetp, lipid, triglyceride, ldlr, lpl, angptl3, hmgcr, cholesterol, artery	Association between Lipid Levels and Risk for Different Types of Aneurysms: A Mendelian Randomization Study.
pops_plus	29419410	20180209	10	heart, lipid, atherosclerosis, triglyceride, lpl, fatty acid, cholesterol, cardiovascular, triglycerides, diabetes	2017 George Lyman Duff Memorial Lecture: Fat in the Blood, Fat in the Artery, Fat in the Heart: Triglyceride in Physiology and Disease.
pops_plus	1800821	19910101	10	apob, lipid, atherosclerosis, triglyceride, coronary, lipids, cholesterol, artery, cardiovascular, coronary artery	[Biochemical indicators of coronary arteriosclerosis].
pops_plus	11412677	20010620	10	heart, apoe, lipid, coronary heart, coronary, cholesterol, artery, cardiovascular, triglycerides, coronary artery	[Apolipoprotein E polymorphism and coronary disease].
pops_plus	29197254	20171203	10	heart, lipid, coronary heart, coronary, met, stroke, pad, cholesterol, diabetes, cardiovascular	Utilization of lipid-modifying therapy and low-density lipoprotein cholesterol goal attainment in patients at high and very-high cardiovascular risk: Real-world evidence from Germany.
pops_plus	31499127	20190910	10	coronary artery, gck, coronary, ldlr, hmgcr, cholesterol, artery, apoa1, galnt2, bcl2	Investigating Coronary Artery Disease methylome through targeted bisulfite sequencing.
pops_plus	25131181	20140819	10	type 2 diabetes, lipid, por, coronary, hyperlipidemia, coronary artery, cholesterol, artery, cardiovascular, diabetes	[Familial combined hyperlipidemia: consensus document].
pops_plus	27403140	20160713	10	type 2 diabetes, pcsk9, lipid, coronary, hyperlipidemia, coronary artery, cholesterol, tf, artery, diabetes	Positive correlation between plasma PCSK9 and tissue factors levels in patients with angiographically diagnosed coronary artery disease and diabetes mellitus.
pops_plus	27421018	20160716	10	tnks, msra, etv5, lipid, type ii diabetes, lepr, stroke, sec16b, diabetes, cardiovascular	Exome sequencing in Thai patients with familial obesity.
pops_plus	15146369	20040518	10	type 2 diabetes, apob, coronary artery, triglyceride, coronary, hyperlipidemia, cholesterol, artery, triglycerides, diabetes	Qualitative effect of fenofibrate and quantitative effect of atorvastatin on LDL profile in combined hyperlipidemia with dense LDL.
pops_plus	27051590	20160407	10	type 2 diabetes, apob, lipid, vldlr, cd36, lpl, lipids, hmgcr, cyp7a1, diabetes	Diabetic and dyslipidaemic morbidly obese exhibit more liver alterations compared with healthy morbidly obese.
pops_plus	19336475	20090402	10	heart, apoe, apob, coronary heart, coronary, ldlr, lpl, cholesterol, cetp, triglycerides	Integrated associations of genotypes with multiple blood biomarkers linked to coronary heart disease risk.
pops_plus	21777527	20110723	10	heart, lipid, coronary heart, coronary, ldlr, coronary artery, cholesterol, artery, cardiovascular, diabetes	Two novel mutations in exon 3 and 4 of low density lipoprotein (LDL) receptor gene in patients with heterozygous familial hypercholesterolemia.
pops_plus	11427211	20010628	10	heart, lipid, coronary heart, triglyceride, coronary, lpl, lipids, cholesterol, triglycerides, diabetes	Lipoprotein lipase D9N, N291S and S447X polymorphisms: their influence on premature coronary heart disease and plasma lipids.
pops_plus	26494228	20151024	10	heart, pcsk9, lipid, coronary heart, triglyceride, cd36, coronary, fatty acid, cholesterol, triglycerides	PCSK9 Induces CD36 Degradation and Affects Long-Chain Fatty Acid Uptake and Triglyceride Metabolism in Adipocytes and in Mouse Liver.
pops_plus	26500845	20151027	10	heart, type 2 diabetes, apoe, lipid, atherosclerosis, fatty acid, cholesterol, artery, diabetes, lipids	TIMP3 interplays with apelin to regulate cardiovascular metabolism in hypercholesterolemic mice.
pops_plus	9719399	19980827	10	heart, cetp, lipid, coronary heart, lcat, triglyceride, coronary, lipids, cholesterol, triglycerides	Moderate doses of alcoholic beverages with dinner and postprandial high density lipoprotein composition.
pops_plus	10918811	20000805	10	heart, coronary heart, atherosclerosis, coronary, met, lipids, cholesterol, cardiovascular, triglycerides, diabetes	[Cholesterolemia control in Spain, 2000. A tool for cardiovascular disease prevention. Ministry of Health and Consumption, Spanish Society of Cardiology and Spanish Society of Arteriosclerosis].
pops_plus	28146135	20170202	10	igf1, apob, vldlr, cd36, lepr, akt1, srebf1, jak2, bcl2, lipid	The Transcription Profile Unveils the Cardioprotective Effect of Aspalathin against Lipid Toxicity in an In Vitro H9c2 Model.
pops_plus	25864161	20150413	10	lipc, pcsk9, cetp, lipid, atherosclerosis, lpl, lipids, cholesterol, triglycerides, cardiovascular	Ethnic differences in the association between lipid metabolism genes and lipid levels in black and white South African women.
pops_plus	16990559	20060923	10	heart, type 2 diabetes, apob, lipid, coronary heart, coronary, hyperlipidemia, cholesterol, triglycerides, diabetes	Relationship between lipid abnormalities and insulin resistance in Japanese school children.
pops_plus	23103135	20121030	10	heart, apob, coronary artery, coronary heart, atherosclerosis, coronary, cholesterol, artery, cardiovascular, diabetes	Interpretation of lipoprotein-associated phospholipase A2 levels is influenced by cardiac disease, comorbidities, extension of atherosclerosis and treatments.
pops_plus	26750181	20160112	10	heart, apoe, lipid, coronary heart, atherosclerosis, triglyceride, coronary, stroke, cholesterol, cardiovascular	Atherosclerotic cardiovascular disease: a review of initiators and protective factors.
pops_plus	26031353	20150603	10	heart, type 2 diabetes, coronary heart, coronary, stroke, scd, cholesterol, cardiovascular, triglycerides, diabetes	Coffee: A Selected Overview of Beneficial or Harmful Effects on the Cardiovascular System?
pops_plus	18940399	20081023	10	heart, coronary heart, atherosclerosis, triglyceride, coronary, stroke, angptl4, cholesterol, artery, cardiovascular	Variation in ANGPTL4 and risk of coronary heart disease: the Atherosclerosis Risk in Communities Study.
pops_plus	17109061	20061117	10	apoe, apob, lipid, atherosclerosis, triglyceride, apoa1, lipids, cholesterol, triglycerides, cardiovascular	Links between cardiovascular disease and osteoporosis in postmenopausal women: serum lipids or atherosclerosis per se?
pops_plus	34900839	20211213	10	type 2 diabetes, lipid, coronary, met, coronary artery, fatty acid, cholesterol, artery, triglycerides, diabetes	Targeting dyslipidemia with antioxidative vitamins C, D, and E; a systematic review of meta-analysis studies: Dyslipidemia and antioxidative vitamins.
pops_plus	34581092	20210928	10	type 2 diabetes, lipid, ppara, pon1, triglyceride, insr, lipids, cholesterol, cardiovascular, diabetes	[Mechanism of Astragali Radix-Coptis Rhizoma pair in treating type 2 diabetes mellitus based on network pharmacology].
pops_plus	28508539	20170517	10	lipid, scd, cholesterol, triglyceride, cd36, fabp4, lpl, lipids, fabp1, fatty acid	The effect of maternal obesity on fatty acid transporter expression and lipid metabolism in the full-term placenta of lean breed swine.
pops_plus	19149704	20090120	10	type 2 diabetes, lipid, triglyceride, coronary, coronary artery, cholesterol, artery, kit, triglycerides, diabetes	Rapid and simple profiling of lipoproteins by polyacrylamide-gel disc electrophoresis to determine the heterogeneity of low-density lipoproteins (LDLs) including small, dense LDL.
pops_plus	31344341	20190726	10	heart, type 2 diabetes, coronary heart, coronary, met, stroke, cholesterol, cardiovascular, triglycerides, diabetes	Risk of Cardiovascular Events in Patients With Type 2 Diabetes and Metabolic Dyslipidemia Without Prevalent Atherosclerotic Cardiovascular Disease.
pops_plus	31328769	20190723	10	igf1, lipid, scd, abca1, elovl6, ldlr, mttp, hmgcr, cholesterol, triglycerides	Folic acid perfusion administration reduced abdominal fat deposition in starter Arbor Acres broilers.
pops_plus	25620253	20150127	10	heart, apob, coronary artery, coronary heart, coronary, lipid, lipids, artery, apoa1, diabetes	[Association between apolipoprotein A1-75 bp gene polymorphisms and risk for dyslipidemia and coronary artery disease].
pops_plus	20696151	20100811	10	type 2 diabetes, lipid, lcat, lpl, fatty acid, cholesterol, cardiovascular, diabetes, triglycerides, lipids	Antihyperlipidemic effect of chlorogenic acid and tetrahydrocurcumin in rats subjected to diabetogenic agents.
pops_plus	28026031	20161228	10	heart, lipid, coronary heart, coronary, met, stroke, pad, cholesterol, diabetes, cardiovascular	Patterns and predictors of lipid-lowering therapy in patients with atherosclerotic cardiovascular disease and/or diabetes mellitus in 2014: Insights from a large US managed-care population.
pops_plus	27438015	20160721	10	abcg5, abca1, ldlr, triglyceride, lipid, hmgcr, cholesterol, cyp7a1, triglycerides, cardiovascular	Hypocholesterolemic Properties and Prebiotic Effects of Mexican Ganoderma lucidum in C57BL/6 Mice.
pops_plus	33262707	20201202	10	heart, pcsk9, triglyceride, coronary, hyperlipidemia, stroke, fatty acid, cholesterol, triglycerides, cardiovascular	PCSK9 in Myocardial Infarction and Cardioprotection: Importance of Lipid Metabolism and Inflammation.
pops_plus	34966361	20211230	10	heart, type 2 diabetes, coronary heart, coronary, ahr, stroke, pad, artery, diabetes, cardiovascular	Survival of Patients Following First Diagnosis of Diabetic Foot Complications: A Nationwide 15-Year Longitudinal Analysis.
pops_plus	14764618	20040207	10	heart, lipid, coronary heart, atherosclerosis, coronary, hyperlipidemia, stroke, cardiovascular, apoa1, diabetes	Genetics of familial combined hyperlipidemia and risk of coronary heart disease.
pops_plus	22654671	20120602	10	heart, lipc, coronary artery, atherosclerosis, triglyceride, coronary, lipids, hmgcr, cholesterol, artery	Knowledge-driven analysis identifies a gene-gene interaction affecting high-density lipoprotein cholesterol levels in multi-ethnic populations.
pops_plus	30201044	20180912	10	pnpla3, type 2 diabetes, lipid, cd36, hyperlipidemia, pparg, angptl3, fatty acid, ppara, diabetes	Sex-specific differences in hepatic steatosis in obese spontaneously hypertensive (SHROB) rats.
pops_plus	25550127	20150101	10	type 2 diabetes, coronary artery, atherosclerosis, lipc, coronary, cholesterol, artery, cardiovascular, triglycerides, diabetes	Hepatic lipase (LIPC) C-514T gene polymorphism is associated with cardiometabolic parameters and cardiovascular risk factors but not with fatty liver in Mexican population.
pops_plus	11916946	20020328	10	heart, lipc, lipid, coronary heart, triglyceride, coronary, coronary artery, cholesterol, artery, diabetes	A common promoter polymorphism in the hepatic lipase gene (LIPC-480C&gt;T) is associated with an increase in coronary calcification in type 1 diabetes.
pops_plus	31725952	20191115	10	heart, apob, lipid, coronary heart, coronary, hyperlipidemia, cholesterol, artery, triglycerides, coronary artery	A novel mutation in USF1 gene is associated with familial combined hyperlipidemia.
pops_plus	31706300	20191111	10	heart, type 2 diabetes, pcsk9, apob, lipid, coronary heart, coronary, cholesterol, cardiovascular, diabetes	Alirocumab therapy in individuals with type 2 diabetes mellitus and atherosclerotic cardiovascular disease: analysis of the ODYSSEY DM-DYSLIPIDEMIA and DM-INSULIN studies.
pops_plus	16959725	20060909	10	lipid, atherosclerosis, peripheral vascular, coronary, hyperlipidemia, met, cardiovascular, artery, diabetes, coronary artery	Optimal medical management of peripheral arterial disease.
pops_plus	16419488	20060120	10	heart, type 2 diabetes, apob, lipid, coronary heart, triglyceride, coronary, lpl, cholesterol, diabetes	Role of candidate genes in the lipid responses to intensified treatment in Type 2 diabetes.
pops_plus	27919931	20161207	10	heart, type 2 diabetes, coronary artery, coronary, cd14, cholesterol, artery, cardiovascular, triglycerides, diabetes	Low MT-CO1 in Monocytes and Microvesicles Is Associated With Outcome in Patients With Coronary Artery Disease.
pops_plus	25299503	20141010	10	type 2 diabetes, lipid, coronary, met, coronary artery, cholesterol, artery, cardiovascular, triglycerides, diabetes	Cardiovascular risk management in type 2 diabetes of more than 10-year duration: Results of Polish ARETAEUS2-Grupa Study.
pops_plus	25403526	20141119	10	heart, lipc, lipid, atherosclerosis, coronary, lipids, hmgcr, cholesterol, artery, coronary artery	Biological knowledge-driven analysis of epistasis in human GWAS with application to lipid traits.
pops_plus	26173004	20150715	10	abcg5, apoe, lipid, atherosclerosis, cyp27a1, lipids, cholesterol, cyp7a1, triglycerides, cardiovascular	Effects of Tomato and Soy Germ on Lipid Bioaccumulation and Atherosclerosis in ApoE-/- Mice.
pops_plus	25258384	20140927	10	heart, pcsk9, cetp, coronary heart, atherosclerosis, coronary, ldlr, apoe, cholesterol, cardiovascular	PCSK9 inhibition fails to alter hepatic LDLR, circulating cholesterol, and atherosclerosis in the absence of ApoE.
pops_plus	11230170	20010307	10	heart, apoe, apob, coronary heart, pon1, triglyceride, coronary, ldlr, lpl, apoa1	A combinatorial partitioning method to identify multilocus genotypic partitions that predict quantitative trait variation.
pops_plus	14984018	20040227	10	type 2 diabetes, lipid, atherosclerosis, stroke, lpl, lipids, cholesterol, cardiovascular, triglycerides, diabetes	Lipoprotein abnormalities and their consequences for patients with type 2 diabetes.
pops_plus	25445557	20141203	10	pcsk9, abcg5, timd4, abca1, lpl, pltp, cholesterol, fads1, nr1h3, lipid	Investigation of Functional Genes at Homologous Loci Identified Based on Genome-wide Association Studies of Blood Lipids via High-fat Diet Intervention in Rats using an in vivo Approach.
pops_plus	25463747	20141203	10	apob, lipid, atherosclerosis, coronary, hyperlipidemia, stroke, coronary artery, cholesterol, artery, diabetes	LOX-1 in atherosclerotic disease.
pops_plus	32115487	20200303	10	heart, lrp1, apob, apoe, timd4, mlxipl, coronary heart, atherosclerosis, coronary, lpl	Variants of Lipid-Related Genes in Adult Japanese Patients with Severe Hypertriglyceridemia.
pops_plus	27864399	20161120	10	apoe, lipid, coronary, apoa1, lipids, cholesterol, artery, cardiovascular, triglycerides, coronary artery	Novel genetic loci associated with long-term deterioration in blood lipid concentrations and coronary artery disease in European adults.
pops_plus	24142754	20131022	10	heart, coronary artery, coronary heart, atherosclerosis, ccs, coronary, stroke, cholesterol, artery, diabetes	Characteristics, management and five-year outcomes of patients with high risk, stable multivessel coronary heart disease.
pops_plus	25110219	20140812	10	cetp, lipid, atherosclerosis, lcat, coronary, hyperlipidemia, cholesterol, artery, abca1, coronary artery	Increased risk of premature coronary artery disease in Egyptians with ABCA1 (R219K), CETP (TaqIB), and LCAT (4886C/T) genes polymorphism.
pops_plus	31952262	20200119	10	lipid, scd, atherosclerosis, type ii diabetes, hyperlipidemia, fatty acid, hmgcr, cholesterol, cardiovascular, diabetes	Beneficial Effects of SREBP Decoy Oligodeoxynucleotide in an Animal Model of Hyperlipidemia.
pops_plus	31918567	20200111	10	heart, lipid, coronary heart, coronary, met, stroke, pad, cholesterol, diabetes, cardiovascular	Lipid-Lowering Therapy and Low-Density Lipoprotein Cholesterol (LDL-C) Goal Achievement in High-Cardiovascular-Risk Patients in Fuzhou, China.
pops_plus	8018665	19940701	10	heart, apob, lipid, coronary heart, atherosclerosis, triglyceride, coronary, cholesterol, triglycerides, cardiovascular	Associations of lipoprotein cholesterols, apolipoproteins A-I and B, and triglycerides with carotid atherosclerosis and coronary heart disease. The Atherosclerosis Risk in Communities (ARIC) Study.
pops_plus	30710474	20190203	10	pcsk9, apob, lipid, coronary, ldlr, cholesterol, artery, cardiovascular, triglycerides, coronary artery	Lipid profile and genetic status in a familial hypercholesterolemia pediatric population: exploring the LDL/HDL ratio.
pops_plus	32982800	20200928	10	heart, lipid, triglyceride, cd36, lpl, lipids, cholesterol, cyp7a1, triglycerides, fatty acid	Inhibition of miR-27b Regulates Lipid Metabolism in Skeletal Muscle of Obese Rats During Hypoxic Exercise by Increasing PPARŒ≥ Expression.
pops_plus	22490578	20120412	10	heart, lipc, lipid, coronary heart, coronary, hyperlipidemia, fatty acid, cholesterol, fads1, triglycerides	Fatty acid desaturase 1 polymorphisms are associated with coronary heart disease in a Chinese population.
pops_plus	29720182	20180504	10	pcsk9, apob, lipid, coronary, ldlr, coronary artery, cholesterol, artery, ldlrap1, cardiovascular	Spectrum of low-density lipoprotein receptor (LDLR) mutations in a cohort of Sri Lankan patients with familial hypercholesterolemia - a preliminary report.
pops_plus	21878044	20110901	10	type 2 diabetes, apob, lipid, triglyceride, coronary, fatty acid, cholesterol, cardiovascular, triglycerides, diabetes	Why, when and how should hypertriglyceridemia be treated in the high-risk cardiovascular patient?
pops_plus	7695175	19950117	10	apob, lipid, atherosclerosis, triglyceride, coronary, coronary artery, cholesterol, artery, apoa1, diabetes	Detection and treatment of elevated blood lipids and other risk factors for coronary artery disease in youth.
pops_plus	11238261	20010310	10	lipid, atherosclerosis, triglyceride, coronary, lipids, cholesterol, artery, abca1, triglycerides, coronary artery	Common genetic variation in ABCA1 is associated with altered lipoprotein levels and a modified risk for coronary artery disease.
pops_plus	9885775	19990114	10	lipid, triglyceride, coronary, hyperlipidemia, met, fatty acid, cholesterol, artery, triglycerides, coronary artery	Hepatic lipase deficiency.
pops_plus	34656950	20211017	10	type 2 diabetes, apob, lipid, atherosclerosis, hyperlipidemia, cholesterol, artery, cardiovascular, triglycerides, diabetes	Postprandial dyslipidemia after a standardized high-fat meal in BMI-matched healthy individuals, and in subjects with prediabetes or type 2 diabetes.
pops_plus	19552844	20090626	10	heart, apob, lipid, coronary heart, triglyceride, coronary, lpl, lipids, cholesterol, diabetes	[Postprandial changes of blood lipid after ordinary Chinese diet and the influencing factors thereof].
pops_plus	34455025	20210829	10	lipid, triglyceride, coronary, hyperlipidemia, met, cholesterol, artery, cardiovascular, dyslipidemias, coronary artery	Familial Hypercholesterolemia, Familial Combined Hyperlipidemia, and Elevated Lipoprotein(a) in Patients With Premature Coronary Artery Disease.
pops_plus	34422975	20210823	10	apoe, lipid, lcat, atherosclerosis, pon1, ldlr, lipids, cholesterol, apoa1, cardiovascular	Hepatic paraoxonase 1 ameliorates dysfunctional high-density lipoprotein and atherosclerosis in scavenger receptor class B type I deficient mice.
pops_plus	34425254	20210823	10	type 2 diabetes, apoe, lipid, atherosclerosis, ldlr, fatty acid, hmgcr, cholesterol, cardiovascular, diabetes	Salsalate reduces atherosclerosis through AMPKŒ≤1 in mice.
pops_plus	29807048	20180529	10	heart, lipid, coronary heart, coronary, hyperlipidemia, met, cholesterol, cardiovascular, triglycerides, diabetes	Portfolio Dietary Pattern and Cardiovascular Disease: A Systematic Review and Meta-analysis of Controlled Trials.
pops_plus	22152282	20111214	10	type 2 diabetes, apob, lipid, abca1, coronary, apoa1, cholesterol, cardiovascular, triglycerides, diabetes	Pitavastatin: novel effects on lipid parameters.
pops_plus	22156577	20111214	10	lipc, apob, lipid, fads1, pltp, lipids, sort1, cetp, apoa1, cardiovascular	Genetic associations with lipoprotein subfractions provide information on their biological nature.
pops_plus	8546139	19960101	10	apob, lipid, atherosclerosis, coronary, coronary artery, lipids, cholesterol, artery, triglycerides, diabetes	Carotid artery lesions in patients with nondiabetic chronic renal failure.
pops_plus	23039238	20121009	10	lipc, pcsk9, apob, lipid, lipg, triglyceride, ppard, mylip, cholesterol, apoa1	Several genetic polymorphisms interact with overweight/obesity to influence serum lipid levels.
pops_plus	31391173	20190809	10	heart, type 2 diabetes, lipid, hadha, coronary, coronary artery, fatty acid, artery, diabetes, lipids	Disturbed Fatty Acid Oxidation, Endoplasmic Reticulum Stress, and Apoptosis in Left Ventricle of Patients With Type 2 Diabetes.
pops_plus	31392579	20190809	10	heart, type 2 diabetes, coronary heart, coronary, ahr, stroke, pad, artery, diabetes, cardiovascular	Effect of Bariatric Surgery on Cardiovascular Events and Metabolic Outcomes in Obese Patients with Insulin-Treated Type 2 Diabetes: a Retrospective Cohort Study.
pops_plus	28864368	20170903	10	type 2 diabetes, apob, lipid, coronary, coronary artery, cholesterol, artery, cardiovascular, triglycerides, diabetes	Triglyceride to High-Density Lipoprotein Cholesterol Ratio and Cardiovascular Events in Diabetics With Coronary Artery Disease.
pops_plus	21195357	20110104	10	heart, type 2 diabetes, coronary artery, coronary heart, coronary, met, cholesterol, artery, cardiovascular, diabetes	Sex-specific differences in metabolic control, cardiovascular risk, and interventions in patients with type 2 diabetes mellitus.
pops_plus	21208155	20110107	10	lipid, atherosclerosis, coronary, hyperlipidemia, gc, cholesterol, artery, cardiovascular, triglycerides, coronary artery	Sobetirome: a selective thyromimetic for the treatment of dyslipidemia.
pops_plus	33231818	20201124	10	lipa, pcsk9, apob, lipid, abcg5, ldlr, apoe, cholesterol, ldlrap1, cardiovascular	Cascade screening and genetic diagnosis of familial hypercholesterolemia in clusters of the Southeastern region from Brazil.
pops_plus	29506984	20180307	10	heart, apob, lipid, coronary, met, coronary artery, lipids, cholesterol, artery, diabetes	Impact of Novel Low-Density Lipoprotein-Cholesterol Assessment on the Utility of Secondary Non-High-Density Lipoprotein-C and Apolipoprotein B Targets in Selected Worldwide Dyslipidemia Guidelines.
pops_plus	31448346	20190827	10	type 2 diabetes, pcsk9, lipid, coronary, coronary artery, lipids, kit, artery, cardiovascular, diabetes	Can metformin stabilize PCSK9 level in stable coronary artery disease patients treated with statins?
pops_plus	20920650	20101006	10	heart, type 2 diabetes, coronary artery, atherosclerosis, coronary, fabp4, fatty acid, artery, cardiovascular, diabetes	Relation of plasma fatty acid binding proteins 4 and 5 with the metabolic syndrome, inflammation and coronary calcium in patients with type-2 diabetes mellitus.
pops_plus	11535564	20010906	10	heart, apob, lipid, coronary heart, atherosclerosis, coronary, lipids, cholesterol, triglycerides, diabetes	Coronary heart disease prediction from lipoprotein cholesterol levels, triglycerides, lipoprotein(a), apolipoproteins A-I and B, and HDL density subfractions: The Atherosclerosis Risk in Communities (ARIC) Study.
pops_plus	27516387	20160813	10	lipc, pcsk9, apob, coronary artery, ldlr, coronary, cetp, hmgcr, artery, lipid	Coding-sequence variants are associated with blood lipid levels in 14,473 Chinese.
pops_plus	27614801	20160912	10	heart, apob, coronary heart, triglyceride, coronary, fatty acid, cholesterol, artery, triglycerides, cardiovascular	Effect of omega-3 fatty acid supplementation on arterial elasticity in patients with familial hypercholesterolaemia on statin therapy.
pops_plus	11331692	20010523	10	heart, apoe, lipid, coronary heart, atherosclerosis, triglyceride, coronary, cholesterol, artery, coronary artery	Noninvasive assessment of the early progression of atherosclerosis in adolescents with Kawasaki disease and coronary artery lesions.
pops_plus	16804065	20060629	10	heart, type 2 diabetes, lipid, coronary heart, hnf4a, coronary, hyperlipidemia, cholesterol, triglycerides, diabetes	Common hepatic nuclear factor-4alpha variants are associated with high serum lipid levels and the metabolic syndrome.
pops_plus	14644402	20031204	10	apoe, apob, lipid, cholesterol, lcat, triglyceride, pltp, lipids, abca1, cetp	Heterozygosity for ABCA1 gene mutations: effects on enzymes, apolipoproteins and lipoprotein particle size.
pops_plus	16375584	20051227	10	heart, apob, coronary heart, triglyceride, coronary, lipids, cholesterol, artery, cardiovascular, diabetes	Serum calcium and phosphorus associate with the occurrence and severity of angiographically documented coronary heart disease, possibly through correlation with atherogenic (apo)lipoproteins.
pops_plus	30542533	20181214	10	apob, lipid, triglyceride, coronary, ldlr, trib1, cholesterol, artery, triglycerides, coronary artery	Novel tricyclic glycal-based <i>TRIB1</i> inducers that reprogram LDL metabolism in hepatic cells.
pops_plus	35047021	20220120	10	type 2 diabetes, pcsk9, apob, lipid, ldlrap1, ldlr, cholesterol, diabetes, triglycerides, cardiovascular	Low Detection Rates of Genetic FH in Cohort of Patients With Severe Hypercholesterolemia in the United Arabic Emirates.
pops_plus	18261733	20080212	10	heart, lipid, coronary heart, triglyceride, coronary, ldlr, lipids, hmgcr, cholesterol, cardiovascular	Genetic variation at the LDL receptor and HMG-CoA reductase gene loci, lipid levels, statin response, and cardiovascular disease incidence in PROSPER.
pops_plus	12357127	20021003	10	heart, coronary heart, atherosclerosis, coronary, hyperlipidemia, met, stroke, cholesterol, triglycerides, cardiovascular	Management of dyslipidemia in the primary prevention of coronary heart disease.
pops_plus	12044583	20020605	10	heart, apoe, apob, lipid, coronary heart, triglyceride, coronary, cholesterol, artery, coronary artery	Coronary artery disease and dyslipidemia within Europe: genetic variants in lipid transport gene loci in German subjects with premature coronary artery disease.
pops_plus	15356432	20040910	10	heart, lipid, scd, atherosclerosis, coronary, stroke, cholesterol, artery, cardiovascular, coronary artery	Prevention of ventricular fibrillation, acute myocardial infarction (myocardial necrosis), heart failure, and mortality by bretylium: is ischemic heart disease primarily adrenergic cardiovascular disease?
pops_plus	29325849	20180113	10	atherosclerosis, ldlr, triglyceride, abca1, abcb11, lipids, cholesterol, cyp7a1, triglycerides, diabetes	Coagonist of GLP-1 and glucagon decreases liver inflammation and atherosclerosis in dyslipidemic condition.
pops_plus	16548354	20060322	10	lipid, lcat, triglyceride, coronary, hyperlipidemia, lpl, lipids, cholesterol, artery, coronary artery	[Study on mechanism of yangxincao capsule in regulating lipid metabolism].
pops_plus	30594773	20181231	10	heart, apoe, apob, coronary artery, triglyceride, coronary, pad, lipids, artery, cardiovascular	Plasma levels of apolipoproteins C-III, A-IV, and E are independently associated with stable atherosclerotic cardiovascular disease.
pops_plus	30593551	20181230	10	heart, pcsk9, apob, lipid, coronary heart, coronary, ldlr, cholesterol, ldlrap1, cardiovascular	Impact of genetic testing on low-density lipoprotein cholesterol in patients with familial hypercholesterolemia (GenTLe-FH): a randomised waiting list controlled open-label study protocol.
pops_plus	17483372	20070508	10	heart, lipid, coronary heart, abcg5, coronary, hyperlipidemia, ldlr, cholesterol, dyslipidemias, cardiovascular	Update on dyslipidemia.
pops_plus	9115542	19961001	10	heart, apoe, apob, coronary heart, triglyceride, coronary, cholesterol, cardiovascular, triglycerides, diabetes	Lipoprotein profiles in Alaskan Siberian Yupik Eskimos.
pops_plus	14687897	20031223	10	heart, type 2 diabetes, coronary artery, coronary heart, atherosclerosis, coronary, mif, artery, cardiovascular, diabetes	Upregulation of CD40--CD40 ligand system in patients with diabetes mellitus.
pops_plus	32226531	20200401	10	lipid, atherosclerosis, coronary, hyperlipidemia, cholesterol, sort1, artery, cardiovascular, triglycerides, coronary artery	Activation of microRNA-378a-3p biogenesis promotes hepatic secretion of VLDL and hyperlipidemia by modulating ApoB100-Sortilin1 axis.
pops_plus	12948871	20030902	10	lipid, atherosclerosis, coronary, coronary artery, cholesterol, artery, abca1, cardiovascular, triglycerides, diabetes	Clinical significance of high-density lipoproteins and the development of atherosclerosis: focus on the role of the adenosine triphosphate-binding cassette protein A1 transporter.
pops_plus	10751747	20000407	10	type 2 diabetes, apob, lipid, triglyceride, apoa1, lipids, cholesterol, cardiovascular, triglycerides, diabetes	Pravastatin compared to bezafibrate in the treatment of dyslipidemia in insulin-treated patients with type 2 diabetes mellitus.
pops_plus	28408313	20170415	10	heart, pcsk9, cetp, coronary heart, atherosclerosis, triglyceride, coronary, mttp, cholesterol, cardiovascular	Preventing cardiovascular heart disease: Promising nutraceutical and non-nutraceutical treatments for cholesterol management.
pops_plus	21674150	20110616	10	type 2 diabetes, lipid, scd, atherosclerosis, cd36, abca1, fatty acid, cholesterol, cardiovascular, diabetes	Dyslipidemic diabetic serum increases lipid accumulation and expression of stearoyl-CoA desaturase in human macrophages.
pops_plus	25277696	20141004	10	heart, type 2 diabetes, coronary heart, coronary, stroke, scd, cholesterol, cardiovascular, triglycerides, diabetes	Coffee: A Selected Overview of Beneficial or Harmful Effects on the Cardiovascular System?
pops_plus	23337395	20130123	10	tgfb1, type 2 diabetes, apoe, fn1, atherosclerosis, ppard, lpl, nfkb1, diabetes, cardiovascular	Gene expression in peripheral blood of patients with hypertension and patients with type 2 diabetes.
pops_plus	28618915	20170617	10	pcsk9, lipid, atherosclerosis, coronary, stroke, coronary artery, cholesterol, artery, cardiovascular, diabetes	Coronary artery disease: Risk stratification and patient selection for more aggressive secondary prevention.
pops_plus	11855698	20020222	10	heart, type 2 diabetes, lipid, coronary heart, triglyceride, coronary, bad, cholesterol, triglycerides, diabetes	Rising to the challenge of the new NCEP ATP III guidelines: exceeding current therapeutic limitations.
pops_plus	27000070	20160323	10	heart, stat3, lipid, coronary heart, cd36, coronary, lpl, fatty acid, artery, lipids	Effect of DanQi Pill on PPARŒ±, lipid disorders and arachidonic acid pathway in rat model of coronary heart disease.
pops_plus	11887432	20020313	10	heart, apob, lipid, coronary heart, triglyceride, coronary, hyperlipidemia, fatty acid, cholesterol, triglycerides	Impact of obesity in primary hyperlipidemias.
pops_plus	18437354	20080426	10	heart, coronary heart, atherosclerosis, tcf7l2, coronary, stroke, pad, artery, diabetes, cardiovascular	TCF7L2 single nucleotide polymorphisms, cardiovascular disease and all-cause mortality: the Atherosclerosis Risk in Communities (ARIC) study.
pops_plus	34796210	20211119	10	lrp1, lipid, atherosclerosis, triglyceride, hyperlipidemia, ldlr, apoe, cholesterol, triglycerides, cardiovascular	Dietary-Induced Elevations of Triglyceride-Rich Lipoproteins Promote Atherosclerosis in the Low-Density Lipoprotein Receptor Knockout Syrian Golden Hamster.
pops_plus	26969281	20160313	10	heart, type 2 diabetes, apoe, lipid, coronary, stroke, coronary artery, lipids, artery, diabetes	Lipoprotein binding to anionic biopolyelectrolytes and the effect of glucose on nanoplaque formation in arteriosclerosis and Alzheimer's disease.
pops_plus	21613373	20110527	10	lipc, apob, lipid, abca1, lpl, lipids, cholesterol, fads1, cetp, triglycerides	Evaluation of serum lipid concentrations and genetic variants at high-density lipoprotein metabolism loci and TIMP3 in age-related macular degeneration.
pops_plus	29627296	20180409	10	heart, apob, lipid, coronary heart, coronary, apoa1, stroke, cholesterol, triglycerides, cardiovascular	Relationship between lipoprotein subfraction cholesterol and residual risk for cardiovascular outcomes: A post hoc analysis of the AIM-HIGH¬†trial.
pops_plus	29621698	20180406	10	heart, lipid, coronary heart, atherosclerosis, coronary, met, lipids, cholesterol, cardiovascular, diabetes	Plasma methionine and risk of acute myocardial infarction: Effect modification by established risk factors.
pops_plus	27215419	20160525	10	pcsk9, cetp, lipid, triglyceride, coronary, cholesterol, artery, cardiovascular, triglycerides, coronary artery	[Impact of lipid metabolism parameters on the development and progression of coronary artery disease : An update].
pops_plus	32039990	20200211	10	heart, pcsk9, apob, lipid, coronary heart, triglyceride, coronary, angptl3, cholesterol, cardiovascular	Hypobetalipoproteinemia and abetalipoproteinemia: liver disease and cardiovascular disease.
pops_plus	32041280	20200212	10	type 2 diabetes, tp53, stat3, sp1, creb1, pparg, srebf1, tf, nfkb1, diabetes	A Network-Based Bioinformatics Approach to Identify Molecular Biomarkers for Type 2 Diabetes that Are Linked to the Progression of Neurological Diseases.
pops_plus	24586211	20140304	10	apob, coronary artery, atherosclerosis, coronary, pparg, ldlr, mttp, cholesterol, tf, artery	Plasma cholesterol-induced lesion networks activated before regression of early, mature, and advanced atherosclerosis.
pops_plus	22623978	20120525	10	apoe, cetp, lipid, triglyceride, coronary, coronary artery, cholesterol, sort1, artery, diabetes	A replication study of GWAS-derived lipid genes in Asian Indians: the chromosomal region 11q23.3 harbors loci contributing to triglycerides.
pops_plus	27367537	20160702	10	mlxipl, ppara, rxra, elovl6, pparg, ppard, srebf1, fatty acid, abca1, nfkb1	n-3 Fatty acids modulate the mRNA expression of the Nlrp3 inflammasome and Mtor in the liver of rats fed with high-fat or high-fat/fructose diets.
pops_plus	30884843	20190320	10	abcg1, type 2 diabetes, stat3, lipid, cd36, fatty acid, abca1, fgfr4, triglycerides, diabetes	Ursodeoxycholic Acid Regulates Hepatic Energy Homeostasis and White Adipose Tissue Macrophages Polarization in Leptin-Deficiency Obese Mice.
pops_plus	24386095	20140104	10	lipc, cetp, lipid, apoa1, lpl, lipids, hmgcr, cholesterol, triglycerides, cardiovascular	A genome wide association study identifies common variants associated with lipid levels in the Chinese population.
pops_plus	24725463	20140415	10	heart, type 2 diabetes, coronary artery, coronary, col4a2, lipids, artery, cardiovascular, triglycerides, diabetes	Analysis of common and coding variants with cardiovascular disease in the Diabetes Heart Study.
pops_plus	28806974	20170816	10	apob, lipid, atherosclerosis, coronary, apoa1, fatty acid, cholesterol, artery, triglycerides, coronary artery	Association of plasma fatty acid alteration with the severity of coronary artery disease lesions in Tunisian patients.
pops_plus	19491422	20090604	10	heart, cetp, lipid, coronary heart, atherosclerosis, coronary, lipids, cholesterol, artery, coronary artery	Taq1B polymorphism of cholesteryl ester transfer protein (CETP) gene in primary combined hyperlipidaemia.
pops_plus	28213390	20170219	10	heart, apob, lipid, abcg1, coronary heart, coronary, lipids, cholesterol, triglycerides, cardiovascular	Epigenetic Patterns in Blood Associated With Lipid Traits Predict Incident Coronary Heart Disease Events and Are Enriched for Results From Genome-Wide Association Studies.
pops_plus	9430859	19980212	10	apob, lipid, coronary, stroke, coronary artery, cholesterol, artery, cardiovascular, triglycerides, diabetes	Apolipoprotein A, fibrinogen, age, and history of stroke are predictors of death in dialysed diabetic patients: a prospective study in 412 subjects.
pops_plus	26517924	20151031	10	lipid, atherosclerosis, triglyceride, coronary, mttp, lipids, trib1, cholesterol, artery, coronary artery	The role of TRIB1 in lipid metabolism; from genetics to pathways.
pops_plus	25070550	20140730	10	heart, pcsk9, apob, lipid, coronary heart, triglyceride, coronary, ldlr, scd, cholesterol	Proprotein convertase subtilisin kexin type 9 promotes intestinal overproduction of triglyceride-rich apolipoprotein B lipoproteins through both low-density lipoprotein receptor-dependent and -independent mechanisms.
pops_plus	31473330	20190902	10	lrp1, lipid, triglyceride, cd36, ldlr, lpl, lipids, cholesterol, aco1, fatty acid	Regulation of triglyceride synthesis by estradiol in the livers of hybrid tilapia (Oreochromis niloticus ‚ôÄ‚ÄØ√ó‚ÄØO. aureus ‚ôÇ).
pops_plus	32535406	20200615	10	heart, type 2 diabetes, lipid, coronary heart, atherosclerosis, coronary, scd, cholesterol, triglycerides, diabetes	Arctium lappa L. polysaccharide can regulate lipid metabolism in type 2 diabetic rats through the SREBP-1/SCD-1 axis.
pops_plus	26980204	20160317	10	pcsk9, apob, lipid, atherosclerosis, ldlr, apoe, lipids, cholesterol, artery, triglycerides	Human PCSK9 promotes hepatic lipogenesis and atherosclerosis development via apoE- and LDLR-mediated mechanisms.
pops_plus	28984319	20171007	10	coronary artery, atherosclerosis, triglyceride, coronary, angptl4, angptl3, fatty acid, cholesterol, artery, triglycerides	Angiopoietin-like 3 in lipoprotein metabolism.
pops_plus	26619277	20151201	10	heart, apoe, apob, lipid, atherosclerosis, apoa1, cholesterol, triglycerides, fgb, cardiovascular	Polymicrobial Oral Infection with Four Periodontal Bacteria Orchestrates a Distinct Inflammatory Response and Atherosclerosis in ApoE null Mice.
pops_plus	26629128	20151203	10	type 2 diabetes, lipid, triglyceride, cd36, coronary, hyperlipidemia, stroke, coronary artery, artery, diabetes	CD36 genotype associated with ischemic stroke in Chinese Han.
pops_plus	28399420	20170412	10	heart, apoe, abcg1, atherosclerosis, ldlr, cd36, abca1, stroke, cholesterol, artery	Dietary rose hip exerts antiatherosclerotic effects and increases nitric oxide-mediated dilation in ApoE-null mice.
pops_plus	32508962	20200609	10	dnmt1, coronary artery, atherosclerosis, triglyceride, coronary, apoe, lipids, cholesterol, artery, cardiovascular	Resveratrol ameliorates atherosclerosis induced by high-fat diet and LPS in ApoE<sup>-/-</sup> mice and inhibits the activation of CD4<sup>+</sup> T cells.
pops_plus	3458343	19860101	10	lipid, coronary heart, triglyceride, coronary, coronary artery, cholesterol, artery, lpl, triglycerides, diabetes	[Pathologic decrease in lipoprotein lipase activity in relation to the development of hyperlipemias and their significance for coronary heart disease].
pops_plus	34532028	20210917	10	abcg5, scd, cd36, hyperlipidemia, fatty acid, hmgcr, cholesterol, cyp7a1, lipids, lipid	Glycosaminoglycan from <i>Ostrea rivularis</i> attenuates hyperlipidemia and regulates gut microbiota in high-cholesterol diet-fed zebrafish.
pops_plus	34518331	20210914	10	apob, lipid, coronary, apoa1, coronary artery, cholesterol, artery, cardiovascular, triglycerides, diabetes	Higher blood high density lipoprotein and apolipoprotein A1 levels are associated with reduced risk of developing amyotrophic lateral sclerosis.
pops_plus	32860031	20200830	10	type 2 diabetes, lipid, coronary, coronary artery, angptl3, cholesterol, artery, cardiovascular, triglycerides, diabetes	Vupanorsen, an N-acetyl galactosamine-conjugated antisense drug to ANGPTL3 mRNA, lowers triglycerides and atherogenic lipoproteins in patients with diabetes, hepatic steatosis, and hypertriglyceridaemia.
pops_plus	19060911	20081209	10	heart, lipid, coronary heart, abcg5, coronary, lipids, cholesterol, fads3, triglycerides, diabetes	Loci influencing lipid levels and coronary heart disease risk in 16 European population cohorts.
pops_plus	19023137	20081122	10	heart, cetp, lipid, coronary heart, atherosclerosis, triglyceride, coronary, pltp, lipids, cholesterol	The role of plasma lipid transfer proteins in lipoprotein metabolism and atherogenesis.
pops_plus	33011372	20201004	10	heart, apoe, lipid, coronary heart, atherosclerosis, coronary, fatty acid, cholesterol, cardiovascular, lipids	Dingxin Recipe IV attenuates atherosclerosis by regulating lipid metabolism through LXR-Œ±/SREBP1 pathway and modulating the gut microbiota in ApoE<sup>-/-</sup> mice fed with HFD.
pops_plus	33029257	20201008	10	heart, apob, lipid, coronary, coronary artery, kit, artery, diabetes, apoa1, cardiovascular	Relationship between Plasma Lipoprotein-Associated Phospholipase A2 Concentrations and Apolipoprotein in Stable Coronary Artery Disease Patients.
pops_plus	25632026	20150130	10	lipa, heart, pcsk9, apob, lipid, abca1, ldlr, apoe, cholesterol, dyslipidemias	Exome sequencing in suspected monogenic dyslipidemias.
pops_plus	10695704	20000301	10	heart, lipid, coronary heart, coronary, hyperlipidemia, met, cholesterol, artery, dyslipidemias, coronary artery	Secondary prevention in a cardiology group practice and hospital setting after a heart-care initiative.
pops_plus	31754844	20191123	10	heart, pcsk9, lipid, coronary heart, atherosclerosis, triglyceride, coronary, stroke, cholesterol, cardiovascular	Lowering Targeted Atherogenic Lipoprotein Cholesterol Goals for Patients at "Extreme" ASCVD Risk.
pops_plus	10464784	19990828	10	apoe, lipid, atherosclerosis, coronary, coronary artery, lipids, cholesterol, artery, triglycerides, diabetes	Role of lipid, apolipoprotein levels and apolipoprotein E genotype in young Italian patients with myocardial infarction.
pops_plus	12937897	20030826	10	heart, apoe, lipid, coronary heart, triglyceride, coronary, hyperlipidemia, lipids, cholesterol, triglycerides	The single nucleotide polymorphism -1131T&gt;C in the apolipoprotein A5 (APOA5) gene is associated with elevated triglycerides in patients with hyperlipidemia.
pops_plus	21128879	20101207	10	heart, cetp, lipid, coronary heart, atherosclerosis, coronary, met, lipids, cholesterol, cardiovascular	Rationale and design of dal-VESSEL: a study to assess the safety and efficacy of dalcetrapib on endothelial function using brachial artery flow-mediated vasodilatation.
pops_plus	34959891	20211228	10	lipid, triglyceride, coronary, lpl, angptl3, cholesterol, artery, cardiovascular, triglycerides, coronary artery	Relationship between Serum Angiopoietin-like Proteins 3 and 8 and Atherogenic Lipid Biomarkers in Non-Diabetic Adults Depends on Gender and Obesity.
pops_plus	16764556	20060613	10	heart, zfpm2, rxra, casp8, coronary, pten, vegfa, nf1, gata4, fgfr1	Molecular mechanisms controlling the coupled development of myocardium and coronary vasculature.
pops_plus	9667803	19980717	10	apoe, apob, lipid, atherosclerosis, triglyceride, coronary, stroke, cholesterol, artery, coronary artery	Genetic risk factors and ischaemic cerebrovascular disease: role of common variation of the genes encoding apolipoproteins and angiotensin-converting enzyme.
pops_plus	31669498	20191101	10	heart, pcsk9, apob, coronary heart, atherosclerosis, coronary, ldlr, cholesterol, diabetes, cardiovascular	Reducing cardiovascular risk in patients with familial hypercholesterolemia: Risk prediction and lipid management.
pops_plus	20686565	20100806	10	lipid, ppp1r3b, coronary, lipids, cholesterol, artery, cyp7a1, triglycerides, galnt2, coronary artery	Biological, clinical and population relevance of 95 loci for blood lipids.
pops_plus	21606463	20110525	10	lipid, atherosclerosis, triglyceride, abca1, cyp27a1, ldlr, lpl, cholesterol, artery, diabetes	Hyperglycemic Ins2AkitaLdlr‚Åª/‚Åª mice show severely elevated lipid levels and increased atherosclerosis: a model of type 1 diabetic macrovascular disease.
pops_plus	35132345	20220208	10	apoe, lipid, ppara, lcat, apoa1, fatty acid, cholesterol, diabetes, triglycerides, lipids	Differentially Expressed Hepatic Genes Revealed by Transcriptomics in Pigs with Different Liver Lipid Contents.
pops_plus	15656025	20050120	10	heart, apob, lipid, coronary heart, atherosclerosis, coronary, cholesterol, artery, triglycerides, coronary artery	Apolipoproteins: correlation with carotid intimamedia thickness and coronary artery disease.
pops_plus	15657615	20050120	10	lipc, apoe, lipid, triglyceride, coronary, lpl, abca1, artery, apoa1, coronary artery	Polymorphisms in APOA1 and LPL genes are statistically independently associated with fasting TG in men with CAD.
pops_plus	8354314	19930701	10	heart, apoe, apob, coronary heart, coronary, apoa1, lipids, cholesterol, triglycerides, diabetes	Apolipoprotein E phenotypes and plasma lipids in diabetic children and adolescents.
pops_plus	22027268	20111027	10	apob, lipid, scd, atherosclerosis, hyperlipidemia, fatty acid, hmgcr, cholesterol, triglycerides, lipids	Pollock oil supplementation modulates hyperlipidemia and ameliorates hepatic steatosis in mice fed a high-fat diet.
pops_plus	30029099	20180721	10	abcg1, cetp, coronary artery, atherosclerosis, coronary, lipids, cholesterol, artery, abca1, cardiovascular	Plasma high density lipoproteins: Therapeutic targeting and links to atherogenic inflammation.
pops_plus	32156004	20200312	10	gpam, lipid, pnpla2, triglyceride, cd36, pparg, lipids, fabp1, bcl2, fatty acid	High-Dose Dexamethasone Manipulates the Tumor Microenvironment and Internal Metabolic Pathways in Anti-Tumor Progression.
pops_plus	10532693	19991026	10	apoe, apob, coronary artery, atherosclerosis, triglyceride, coronary, lipids, cholesterol, artery, triglycerides	The effect of aggressive and moderate lowering of LDL-cholesterol and low dose anticoagulation on plasma lipids, apolipoproteins and lipoprotein families in post coronary artery bypass graft trial.
pops_plus	18067591	20071211	10	heart, apoe, coronary heart, atherosclerosis, ldlr, cd36, coronary, cd14, cholesterol, abca1	CD36 mRNA expression is increased in CD14+ monocytes of patients with coronary heart disease.
pops_plus	3907293	19850101	10	heart, apob, coronary artery, coronary heart, atherosclerosis, coronary, hyperlipidemia, cholesterol, artery, diabetes	Abnormalities in metabolism of low density lipoproteins associated with coronary heart disease.
pops_plus	3974570	19850101	10	heart, lipid, coronary heart, lcat, peripheral vascular, triglyceride, coronary, lipids, cholesterol, fatty acid	[Serum lipids and lipoproteins in peripheral vascular disease].
pops_plus	27142749	20160505	10	abcg1, apoe, lipid, atherosclerosis, cd36, abca1, bad, fatty acid, cholesterol, cardiovascular	Protective role of n6/n3 PUFA supplementation with varying DHA/EPA ratios against atherosclerosis in mice.
pops_plus	16613269	20060415	10	type 2 diabetes, apob, lipid, triglyceride, apoa1, lipids, cholesterol, diabetes, triglycerides, fatty acid	[Effects of huanglian jiedu decoction on leptin and resistin in insulin resistive rats].
pops_plus	35203469	20220225	10	f2, lipid, atherosclerosis, coronary, pltp, lipids, cholesterol, artery, cardiovascular, coronary artery	Comprehensive Statistical and Bioinformatics Analysis in the Deciphering of Putative Mechanisms by Which Lipid-Associated GWAS Loci Contribute to Coronary Artery Disease.
pops_plus	35205322	20220225	10	apob, lipid, triglyceride, nrp1, vegfa, lipids, cholesterol, flt1, triglycerides, fatty acid	Impact of Sequential Lipid Meals on Lymphatic Lipid Absorption and Transport in Rats.
pops_plus	35207485	20220225	10	abcg1, apoe, apob, lipid, atherosclerosis, abca1, lipids, cholesterol, apoa1, cardiovascular	<i>Daeshiho-tang</i> Attenuates Atherosclerosis by Regulating Cholesterol Metabolism and Inducing M2 Macrophage Polarization.
pops_plus	35186008	20220221	10	type 2 diabetes, coronary artery, atherosclerosis, pcsk6, coronary, pad, cholesterol, artery, triglycerides, diabetes	Multi-Trait Genome-Wide Association Study of Atherosclerosis Detects Novel Pleiotropic Loci.
pops_plus	12017224	20020523	10	type 2 diabetes, coronary artery, atherosclerosis, coronary, hyperlipidemia, met, cholesterol, artery, cardiovascular, diabetes	Hyperlipidemia in children with type 2 diabetes mellitus.
pops_plus	26141755	20150705	10	lipid, vldlr, triglyceride, hyperlipidemia, ldlr, lipids, hmgcr, cholesterol, cardiovascular, fatty acid	Modulation by geraniol of gene expression involved in lipid metabolism leading to a reduction of serum-cholesterol and triglyceride levels.
pops_plus	26137939	20150704	10	heart, lipid, scd, atherosclerosis, coronary, fatty acid, cholesterol, artery, cardiovascular, coronary artery	A histopathological analysis of the epidemiology of coronary atherosclerosis: an autopsy study.
pops_plus	30956097	20190409	10	apob, lipid, triglyceride, coronary, hyperlipidemia, lipids, cholesterol, artery, triglycerides, coronary artery	Prevalence of heterozygous familial hypercholesterolemia and combined hyperlipidemia phenotype in very young survivors of myocardial infarction and their association with the severity of atheromatous burden.
pops_plus	30935088	20190403	10	heart, lipid, coronary heart, atherosclerosis, pon1, coronary, coronary artery, cholesterol, cardiovascular, diabetes	Paraoxonase 1 Activity, Polymorphism and Atherosclerosis Risk Factors in Patients Undergoing Coronary Artery Surgery.
pops_plus	15030301	20040320	10	heart, apob, abcg5, coronary heart, atherosclerosis, coronary, ldlr, cholesterol, artery, cyp7a1	Primary hypercholesterolemia: genetic causes and treatment of five monogenic disorders.
pops_plus	23479335	20130313	10	heart, apob, lipid, atherosclerosis, lcat, triglyceride, lipids, cholesterol, cetp, triglycerides	Association between lipids, lipoproteins composition of HDL particles and triglyceride-rich lipoproteins, and LCAT and CETP activity in post-renal transplant patients.
pops_plus	20031592	20091225	10	heart, lipid, coronary heart, atherosclerosis, coronary, hnf1a, cholesterol, artery, cardiovascular, coronary artery	Common coding variants of the HNF1A gene are associated with multiple cardiovascular risk phenotypes in community-based samples of younger and older European-American adults: the Coronary Artery Risk Development in Young Adults Study and The Cardiovascular Health Study.
pops_plus	9793596	19981030	10	heart, lipid, coronary heart, triglyceride, coronary, met, cholesterol, cardiovascular, dyslipidemias, diabetes	Atorvastatin in the treatment of primary hypercholesterolemia and mixed dyslipidemias.
pops_plus	34713869	20211029	10	lipid, atherosclerosis, triglyceride, lpl, angptl3, lipids, cholesterol, triglycerides, dyslipidemias, cardiovascular	Evinacumab to treat hypercholesterolemia.
pops_plus	14508233	20030926	10	lipid, coronary heart, coronary, hyperlipidemia, met, cholesterol, artery, cardiovascular, triglycerides, coronary artery	Under treatment with lipid-lowering drugs of high-risk coronary heart disease patients of the GENICA study.
pops_plus	31020929	20190426	10	heart, pcsk9, lipid, coronary heart, coronary, met, cholesterol, artery, cardiovascular, coronary artery	PCSK9 Inhibitor Use in the Real World: Data From the National Patient-Centered Research Network.
pops_plus	25079474	20140801	10	heart, pcsk9, cetp, lipid, atherosclerosis, triglyceride, coronary, stroke, cholesterol, cardiovascular	Looking into the crystal ball-upcoming drugs for dyslipidemia.
pops_plus	19099922	20081223	10	cetp, coronary artery, abca1, triglyceride, coronary, lpl, cholesterol, artery, triglycerides, diabetes	[Geographical characteristics of single nucleotide polymorphism of candidate genes associated with coronary artery disease in Chinese Han population].
pops_plus	22447684	20120327	10	gpam, abcg5, pon1, triglyceride, cd36, hyperlipidemia, pparg, lipids, cholesterol, lipid	Quercetin reduces high-fat diet-induced fat accumulation in the liver by regulating lipid metabolism genes.
pops_plus	12860491	20030716	10	heart, type 2 diabetes, lipid, coronary heart, triglyceride, coronary, met, lipids, cholesterol, diabetes	Comparative effects of simvastatin and atorvastatin in hypercholesterolemic patients with characteristics of metabolic syndrome.
pops_plus	34611635	20211006	10	heart, type 2 diabetes, apob, lipid, atherosclerosis, triglyceride, cholesterol, cardiovascular, triglycerides, diabetes	Discordantly normal ApoB relative to elevated LDL-C in persons with metabolic disorders: A marker of atherogenic heterogeneity.
pops_plus	32949947	20200919	10	apob, lipid, triglyceride, coronary, lipids, cholesterol, artery, cardiovascular, triglycerides, coronary artery	Common APOC3 variants are associated with circulating ApoC-III and VLDL cholesterol but not with total apolipoprotein B and coronary artery disease.
pops_plus	29767610	20180517	10	apob, lipid, ptpn11, abcg5, coronary, ldlr, hnf1a, cholesterol, artery, coronary artery	Detecting novel genes for low-density lipoprotein cholesterol in European population using bioinformatics analysis.
pops_plus	22275303	20120126	10	heart, lipid, hyperlipidemia, ldlr, gc, fatty acid, hmgcr, cholesterol, diabetes, cardiovascular	Essential oil of Pinus koraiensis leaves exerts antihyperlipidemic effects via up-regulation of low-density lipoprotein receptor and inhibition of acyl-coenzyme A: cholesterol acyltransferase.
pops_plus	10984082	20000913	10	heart, apoe, apob, lipid, coronary heart, atherosclerosis, coronary, lipids, cholesterol, triglycerides	Familial defective apolipoprotein B-100: a lesson from homozygous and heterozygous patients.
pops_plus	9108785	19970401	10	apob, lipid, atherosclerosis, triglyceride, coronary, lipids, cholesterol, artery, triglycerides, coronary artery	The role of triglyceride-rich lipoprotein families in the progression of atherosclerotic lesions as determined by sequential coronary angiography from a controlled clinical trial.
pops_plus	9109606	19970401	10	heart, apoe, atherosclerosis, triglyceride, coronary, lpl, lipids, cholesterol, triglycerides, diabetes	Lipid level and type alter stearoyl CoA desaturase mRNA abundance differently in mice with distinct susceptibilities to diet-influenced diseases.
pops_plus	28959666	20170930	10	heart, lipc, lipid, coronary heart, lcat, triglyceride, coronary, ahr, cholesterol, triglycerides	Acute aflatoxin B1 - Induced hepatotoxicity alters gene expression and disrupts lipid and lipoprotein metabolism in rats.
pops_plus	26520906	20151102	10	lipid, atherosclerosis, ldlrap1, apoa1, ldlr, lipids, cholesterol, abca1, triglycerides, cardiovascular	miR-27b inhibits LDLR and ABCA1 expression but does not influence plasma and hepatic lipid levels in mice.
pops_plus	12841490	20030705	10	lipid, atherosclerosis, lcat, coronary, lipids, cholesterol, artery, abca1, apoa1, coronary artery	Normal lipid metabolism, familial hyperlipidaemia, lipid intervention and their benefits.
pops_plus	29845077	20180531	10	heart, type 2 diabetes, stat3, lipid, cebpa, coronary heart, triglyceride, coronary, pparg, diabetes	Ginsenoside Rg5: Rk1 Exerts an Anti-obesity Effect on 3T3-L1 Cell Line by the Downregulation of PPARŒ≥ and CEBPŒ±.
pops_plus	28122565	20170127	10	heart, lipid, atherosclerosis, hyperlipidemia, bad, lipids, cholesterol, cardiovascular, triglycerides, diabetes	Hypolipidemic, antioxidant and anti-atherosclerogenic effect of aqueous extract leaves of Cassia. occidentalis Linn (Caesalpiniaceae) in diet-induced hypercholesterolemic rats.
pops_plus	10807748	20000516	10	apob, lipid, atherosclerosis, triglyceride, coronary, lipids, cholesterol, artery, triglycerides, coronary artery	Common polymorphism in promoter of microsomal triglyceride transfer protein gene influences cholesterol, ApoB, and triglyceride levels in young african american men: results from the coronary artery risk development in young adults (CARDIA) study.
pops_plus	32618632	20200704	10	type 2 diabetes, pcsk9, lipid, atherosclerosis, triglyceride, fatty acid, cholesterol, cardiovascular, triglycerides, diabetes	Lipid management for cardiovascular risk reduction in type 1 diabetes.
pops_plus	21232031	20110115	10	abcg1, apoe, abcg5, cholesterol, triglyceride, abca1, ldlr, lipids, fatty acid, lipid	A novel potent synthetic steroidal liver X receptor agonist lowers plasma cholesterol and triglycerides and reduces atherosclerosis in LDLR(-/-) mice.
pops_plus	31227920	20190623	10	pcsk9, lipid, triglyceride, coronary, cholesterol, artery, cardiovascular, triglycerides, dyslipidemias, coronary artery	Genetics, Dyslipidemia, and Cardiovascular Disease: New Insights.
pops_plus	31233683	20190625	10	lipid, mlxipl, scd, gck, ppara, pparg, srebf1, cholesterol, actb, triglycerides	[Effect of quercetin on the expression of the carbohydrate and lipid metabolism genes in the liver of rats with genetic].
pops_plus	31235370	20190626	10	type 2 diabetes, lipid, atherosclerosis, triglyceride, lpl, lipids, fatty acid, cardiovascular, angptl4, diabetes	ANGPTL4 in Metabolic and Cardiovascular Disease.
pops_plus	15529021	20041106	10	type 2 diabetes, cetp, coronary artery, atherosclerosis, triglyceride, coronary, cholesterol, artery, cardiovascular, diabetes	Role of CETP inhibitors in the treatment of dyslipidemia.
pops_plus	31410562	20190815	10	lipid, scd, cd36, elovl6, pparg, srebf1, fatty acid, hmgcr, ppara, triglycerides	Temperature affects liver and muscle metabolism in photostimulated migratory redheaded buntings (Emberiza bruniceps).
pops_plus	26318958	20150831	10	heart, type 2 diabetes, apoe, lipid, coronary, coronary artery, cholesterol, artery, cardiovascular, diabetes	Association of APOE polymorphisms with diabetes and cardiometabolic risk factors and the role of APOE genotypes in response to anti-diabetic therapy: results from the AIDHS/SDS on a South Asian population.
pops_plus	21861396	20110825	10	heart, apoe, cetp, lipid, coronary heart, atherosclerosis, coronary, lpl, cholesterol, cardiovascular	[The genes of atherosclerosis and cardiovascular diseases].
pops_plus	21040914	20101103	10	lipid, coronary, hyperlipidemia, coronary artery, fatty acid, cholesterol, fads1, artery, fads3, diabetes	FADS gene polymorphisms in Koreans: association with œâ6 polyunsaturated fatty acids in serum phospholipids, lipid peroxides, and coronary artery disease.
pops_plus	15460421	20041006	10	heart, lipid, coronary heart, atherosclerosis, triglyceride, coronary, cholesterol, cardiovascular, apoa1, diabetes	[Study on serum oxidized low density lipoprotein and anti-oxidized competence in patient with coronary heart disease].
pops_plus	29146227	20171118	10	apob, lipid, pon1, coronary, apoa1, cholesterol, artery, cardiovascular, triglycerides, coronary artery	Bariatric surgery improves lipoprotein profile in morbidly obese patients by reducing LDL cholesterol, apoB, and SAA/PON1 ratio, increasing HDL cholesterol, but has no effect on cholesterol efflux capacity.
pops_plus	29124482	20171111	10	heart, type 2 diabetes, lipid, coronary heart, atherosclerosis, triglyceride, coronary, lpl, triglycerides, diabetes	ApoCIII as a Cardiovascular Risk Factor and Modulation by the Novel Lipid-Lowering Agent Volanesorsen.
pops_plus	11468646	20010727	10	heart, type 2 diabetes, coronary artery, coronary, met, cholesterol, artery, cardiovascular, triglycerides, diabetes	The relationship of insulin resistance measured by reliable indexes to coronary artery disease risk factors and outcomes--a systematic review.
pops_plus	11474567	20010728	10	heart, cetp, lipid, coronary heart, atherosclerosis, triglyceride, coronary, hyperlipidemia, lpl, dyslipidemias	[Role of anomalies of low density lipoproteins (LDL) in atherogenicity].
pops_plus	21810592	20110804	10	apoe, lipid, atherosclerosis, ldlr, fatty acid, cholesterol, cardiovascular, diabetes, triglycerides, lipids	Apolipoprotein E4 exaggerates diabetic dyslipidemia and atherosclerosis in mice lacking the LDL receptor.
pops_plus	21819519	20110809	10	heart, type 2 diabetes, cetp, lipid, coronary heart, coronary, cholesterol, cardiovascular, triglycerides, diabetes	Efficacy and safety of dalcetrapib in type 2 diabetes mellitus and/or metabolic syndrome patients, at high cardiovascular disease risk.
pops_plus	12419479	20021107	10	lipid, atherosclerosis, coronary, hyperlipidemia, lpl, fatty acid, cholesterol, artery, triglycerides, coronary artery	Clinical relevance of the biochemical, metabolic, and genetic factors that influence low-density lipoprotein heterogeneity.
pops_plus	35233360	20220302	10	coronary artery, triglyceride, coronary, angptl3, kit, cholesterol, artery, cardiovascular, triglycerides, diabetes	Positive correlation of serum angiopoietin-like protein 3 levels with metabolic syndrome in patients with coronary artery disease.
pops_plus	24025248	20130913	10	tp53, coronary artery, atherosclerosis, lcat, irs1, coronary, ldlr, lpl, cholesterol, artery	Preliminary assessment of differential expression of candidate genes associated with atherosclerosis.
pops_plus	26415676	20150930	10	heart, pcsk9, apob, coronary artery, coronary heart, coronary, ldlr, cholesterol, artery, ldlrap1	Next-generation-sequencing-based identification of familial hypercholesterolemia-related mutations in subjects with increased LDL-C levels in a latvian population.
pops_plus	31123324	20190525	10	adcy5, type 2 diabetes, ank1, gck, hmga2, tcf7l2, park2, pparg, mafb, diabetes	ATAC-seq reveals alterations in open chromatin in pancreatic islets from subjects with type 2 diabetes.
pops_plus	16384561	20051231	10	type 2 diabetes, apob, lipid, triglyceride, coronary, coronary artery, cholesterol, artery, triglycerides, diabetes	Efficacy and tolerability of combined treatment with L-carnitine and simvastatin in lowering lipoprotein(a) serum levels in patients with type 2 diabetes mellitus.
pops_plus	28374891	20170405	10	heart, type 2 diabetes, atherosclerosis, cd36, hyperlipidemia, stroke, cholesterol, cardiovascular, triglycerides, diabetes	Short-Term Hypoxia Reverses Ox-LDL-Induced CD36 and GLUT4 Switching Metabolic Pathways in H9c2 Cardiomyoblast Cells.
pops_plus	25410128	20141121	10	pcsk9, lipid, atherosclerosis, coronary, hyperlipidemia, ldlr, cholesterol, artery, cardiovascular, coronary artery	PCSK9: A key factor modulating atherosclerosis.
pops_plus	26365577	20150915	10	abcg1, lipid, cholesterol, lcat, triglyceride, npc1, pltp, abca1, cyp7a1, cardiovascular	Intake of grape procyanidins during gestation and lactation impairs reverse cholesterol transport and increases atherogenic risk indexes in adult offspring.
pops_plus	32083393	20200222	10	heart, lipid, scd, triglyceride, coronary, lipids, cholesterol, artery, cardiovascular, coronary artery	Baseline plasma lipid levels in patients with acute coronary syndrome: Association with 20-year mortality. The ABC-5a* Study on Heart Disease.
pops_plus	32105674	20200228	10	heart, lipid, coronary heart, atherosclerosis, coronary, stroke, cholesterol, artery, abca1, cardiovascular	Epigenetic-sensitive pathways in personalized therapy of major cardiovascular diseases.
pops_plus	10636448	20000115	10	lipid, triglyceride, coronary, lpl, lipids, cholesterol, artery, triglycerides, dyslipidemias, coronary artery	Two common mutations (D9N, N291S) in lipoprotein lipase: a cumulative analysis of their influence on plasma lipids and lipoproteins in men and women.
pops_plus	24606515	20140311	10	cetp, coronary artery, apom, lcat, coronary, cholesterol, artery, abca1, diabetes, cardiovascular	Metabolism of HDL and its regulation.
pops_plus	24608419	20140311	10	lipc, cetp, lipid, abca1, lpl, lipids, cholesterol, diabetes, triglycerides, cardiovascular	Elevated high-density lipoprotein cholesterol and age-related macular degeneration: the Alienor study.
pops_plus	29593532	20180330	10	apoe, abcg5, atherosclerosis, triglyceride, abca1, srebf1, mylip, lipids, cholesterol, lipid	(-)-Epigallocatechin-3-Gallate Ameliorates Atherosclerosis and Modulates Hepatic Lipid Metabolic Gene Expression in Apolipoprotein E Knockout Mice: Involvement of TTC39B.
pops_plus	17062315	20061026	10	heart, lipid, coronary heart, atherosclerosis, coronary, met, stroke, cholesterol, cardiovascular, diabetes	Impact of rosuvastatin use on costs and outcomes in patients at high risk for cardiovascular disease in US managed care and medicare populations: A data analysis.
pops_plus	12778627	20030605	10	apob, lipid, atherosclerosis, triglyceride, coronary, lipids, cholesterol, artery, apoa1, coronary artery	[Pleiotropic effect of the micronized fenofibrate: the reduction of plasma chlamydia pneumoniae antibody levels in patients with coronary artery disease].
pops_plus	17380167	20070324	10	heart, pcsk9, apob, lipid, coronary heart, atherosclerosis, coronary, ldlr, cholesterol, ldlrap1	Mechanisms of disease: genetic causes of familial hypercholesterolemia.
pops_plus	34729547	20211103	10	heart, type 2 diabetes, apob, coronary heart, coronary, stroke, lipids, cholesterol, triglycerides, diabetes	Effects of apolipoprotein B on lifespan and risks of major diseases including type 2 diabetes: a mendelian randomisation analysis using outcomes in first-degree relatives.
pops_plus	34725640	20211102	10	abcg5, sod1, ppara, casp8, gc, top1, hmgcr, abca1, nr1h3, diabetes	Natural Compounds from Hatikana Extract Potentiate Antidiabetic Actions as Displayed by In Vivo Assays and Verified by Network Pharmacological Tools.
pops_plus	30356742	20181026	10	heart, apoe, coronary artery, coronary heart, atherosclerosis, coronary, cholesterol, artery, cardiovascular, diabetes	Hyperglycemia Aggravates Diet-Induced Coronary Artery Disease and Myocardial Infarction in SR-B1-Knockout/ApoE-Hypomorphic Mice.
pops_plus	9787748	19981027	10	type 2 diabetes, lipid, coronary, met, coronary artery, lipids, cholesterol, artery, triglycerides, diabetes	Hyperlipidemia and diabetes mellitus.
pops_plus	30618759	20190109	10	apoe, apob, lipid, scd, atherosclerosis, triglyceride, fatty acid, cholesterol, artery, apoa1	Anti-hypercholesterolemic Effects and a Good Safety Profile of SCM-198 in Animals: From ApoE Knockout Mice to Rhesus Monkeys.
pops_plus	34021444	20210522	9	lipa, lipid, triglyceride, coronary, ldlr, cholesterol, artery, cardiovascular, coronary artery	Cholesterol-related gene variants are associated with diabetes in coronary artery disease patients.
pops_plus	34036306	20210526	9	heart, lipid, coronary heart, atherosclerosis, coronary, hyperlipidemia, lpl, triglycerides, cardiovascular	Gualou Xiebai Banxia decoction ameliorates Poloxamer 407-induced hyperlipidemia.
pops_plus	34027646	20210524	9	apob, lipid, atherosclerosis, triglyceride, hyperlipidemia, lipids, cholesterol, triglycerides, diabetes	Diet-induced differential effects on plasma lipids secretion by the inositol-requiring transmembrane kinase/endoribonuclease 1Œ±.
pops_plus	19292100	20090319	9	heart, lipid, coronary heart, triglyceride, coronary, lpl, cholesterol, triglycerides, cardiovascular	[Mutagenic aspects of the lipoprotein lipase gene].
pops_plus	21944699	20110928	9	lipc, apob, lipg, apom, lcat, abca1, cetp, cholesterol, apoa1	Plasma levels of sphingosine-1-phosphate and apolipoprotein M in patients with monogenic disorders of HDL metabolism.
pops_plus	34801488	20211121	9	lipid, coronary, coronary artery, angptl3, angptl4, artery, lpl, triglycerides, cardiovascular	Role and mechanism of the action of angiopoietin-like protein ANGPTL4 in plasma lipid metabolism.
pops_plus	34801858	20211121	9	lipid, atherosclerosis, ccs, coronary, lipids, cholesterol, artery, triglycerides, coronary artery	A specific plasma lipid signature associated with high triglycerides and low HDL cholesterol identifies residual CAD risk in patients with chronic coronary syndrome.
pops_plus	34801488	20211121	9	lipid, coronary, coronary artery, angptl3, angptl4, artery, lpl, triglycerides, cardiovascular	Role and mechanism of action of angiopoietin-like protein ANGPTL4 in plasma lipid metabolism.
pops_plus	34805411	20211122	9	type 2 diabetes, apoe, apob, lipid, hnf4a, ldlr, hnf1a, diabetes, lpl	Polymorphisms in Genes of Lipid Metabolism Are Associated with Type 2 Diabetes Mellitus and Periodontitis, as Comorbidities, and with the Subjects' Periodontal, Glycemic, and Lipid Profiles.
pops_plus	26188224	20150719	9	heart, lipid, coronary heart, triglyceride, coronary, lpl, lipids, cholesterol, triglycerides	Study of common variants of the apolipoprotein E and lipoprotein lipase genes in patients with coronary heart disease and variable body mass index.
pops_plus	12671033	20030403	9	apoe, apob, lipid, atherosclerosis, triglyceride, hyperlipidemia, lpl, angptl3, cholesterol	A decreased expression of angiopoietin-like 3 is protective against atherosclerosis in apoE-deficient mice.
pops_plus	29382920	20180201	9	type 2 diabetes, lipid, ppp1r3b, coronary, coronary artery, lipids, cholesterol, artery, diabetes	A systematic analysis highlights multiple long non-coding RNAs associated with cardiometabolic disorders.
pops_plus	29404214	20180207	9	apoe, cetp, lipid, triglyceride, sidt2, met, lipids, cholesterol, cardiovascular	Gene-based association study for lipid traits in diverse cohorts implicates <i>BACE1</i> and <i>SIDT2</i> regulation in triglyceride levels.
pops_plus	17462871	20070428	9	apoe, apob, coronary artery, atherosclerosis, coronary, cholesterol, artery, triglycerides, cardiovascular	Apolipoprotein E polymorphism is associated with both carotid and coronary atherosclerosis in patients with coronary artery disease.
pops_plus	17464999	20070428	9	apob, cholesterol, triglyceride, cd36, mttp, fatty acid, fabp1, cyp7a1, triglycerides	Increased activity of hepatic microsomal triglyceride transfer protein and bile acid synthesis in gallstone disease.
pops_plus	30282955	20181005	9	heart, apoe, lipid, coronary heart, atherosclerosis, coronary, cholesterol, apoa1, cardiovascular	Current and Emerging Reconstituted HDL-apoA-I and HDL-apoE Approaches to Treat Atherosclerosis.
pops_plus	30269829	20181002	9	lipa, pcsk9, apob, abcg5, ldlr, apoe, cholesterol, ldlrap1, cardiovascular	Whole-Gene Duplication of PCSK9 as a Novel Genetic Mechanism for Severe Familial Hypercholesterolemia.
pops_plus	30270094	20181002	9	pcsk9, lipid, coronary, stroke, coronary artery, cholesterol, artery, kit, diabetes	Burden of familial heterozygous hypercholesterolemia in Uzbekistan: Time is muscle.
pops_plus	30275531	20181003	9	type 2 diabetes, pcsk9, lipid, coronary, angptl4, lipids, pde3b, triglycerides, diabetes	Genetics of blood lipids among ~300,000 multi-ethnic participants of the Million Veteran Program.
pops_plus	26423613	20151002	9	type 2 diabetes, apob, atherosclerosis, triglyceride, rbp4, cholesterol, artery, cardiovascular, diabetes	Retinol binding protein 4 correlates with and is an early predictor of carotid atherosclerosis in type 2 diabetes mellitus patients.
pops_plus	25538000	20141225	9	heart, lipid, coronary heart, coronary, cholesterol, artery, kit, triglycerides, cardiovascular	The relationship of plasma catestatin concentrations with metabolic and vascular parameters in untreated hypertensive patients: Influence on high-density lipoprotein cholesterol.
pops_plus	25038300	20140720	9	apob, triglyceride, cyp27a1, ldlr, gc, hmgcr, cholesterol, cyp7a1, apoa1	Cholesterol deregulation induced by chronic corticosterone (CORT) stress in pectoralis major of broiler chickens.
pops_plus	15492149	20041020	9	heart, type 2 diabetes, coronary heart, triglyceride, coronary, met, cholesterol, triglycerides, diabetes	Effects of obesity surgery on the metabolic syndrome.
pops_plus	31524223	20190917	9	pcsk9, lipid, atherosclerosis, triglyceride, cd36, abca1, apoe, lipids, cholesterol	Quercetin protects against atherosclerosis by regulating the expression of PCSK9, CD36, PPARŒ≥, LXRŒ± and ABCA1.
pops_plus	31532247	20190919	9	abcg5, triglyceride, cd36, lipid, lipids, hmgcr, cholesterol, cyp7a1, cardiovascular	Lipid and Cholesterol Homeostasis after Arsenic Exposure and Antibiotic Treatment in Mice: Potential Role of the Microbiota.
pops_plus	26043038	20150605	9	apoe, apob, lipid, triglyceride, hyperlipidemia, lipids, cholesterol, cardiovascular, fatty acid	Effect of dietary Fatty acids on human lipoprotein metabolism: a comprehensive update.
pops_plus	27418968	20160716	9	apoe, lipid, abca1, triglyceride, coronary, cholesterol, artery, cardiovascular, coronary artery	A single infusion of MDCO-216 (ApoA-1 Milano/POPC) increases ABCA1-mediated cholesterol efflux and pre-beta 1 HDL in healthy volunteers and patients with stable coronary artery disease.
pops_plus	28456421	20170501	9	lipc, cetp, lipid, coronary, lipids, cholesterol, artery, triglycerides, coronary artery	Mendelian Randomization Implicates High-Density Lipoprotein Cholesterol-Associated Mechanisms in Etiology of Age-Related Macular Degeneration.
pops_plus	23613974	20130425	9	lipid, hyperlipidemia, ldlr, lpl, fatty acid, cholesterol, cyp7a1, triglycerides, cardiovascular	Anti-hyperlipidemic effects and potential mechanisms of action of the caffeoylquinic acid-rich Pandanus tectorius fruit extract in hamsters fed a high fat-diet.
pops_plus	23619368	20130427	9	apoe, apob, lipid, triglyceride, lipids, cholesterol, cardiovascular, triglycerides, fatty acid	Dietary fatty acids and lipoprotein metabolism: new insights and updates.
pops_plus	21951548	20110929	9	type 2 diabetes, apob, lipid, triglyceride, lipids, cholesterol, cardiovascular, triglycerides, diabetes	Sex differences in lipid profiles in relation to the progression of glucose abnormalities.
pops_plus	16510370	20060303	9	type 2 diabetes, apob, lipid, coronary, coronary artery, artery, cardiovascular, triglycerides, diabetes	Effects of fluvastatin slow-release (XL 80 mg) versus simvastatin (20 mg) on the lipid triad in patients with type 2 diabetes.
pops_plus	33766036	20210326	9	heart, type 2 diabetes, apob, coronary heart, coronary, pad, cholesterol, artery, cardiovascular	Association between cholesterol efflux capacity and peripheral artery disease in coronary heart disease patients with and without type 2 diabetes: from the CORDIOPREV study.
pops_plus	32767644	20200809	9	lipid, coronary, hyperlipidemia, fatty acid, hmgcr, cholesterol, artery, triglycerides, coronary artery	Chronopharmacology of simvastatin on hyperlipidaemia in high-fat diet-fed obese mice.
pops_plus	27784735	20161028	9	heart, pcsk9, apob, lipid, atherosclerosis, ldlr, cholesterol, ldlrap1, cardiovascular	Homozygous Familial Hypercholesterolemia in Spain: Prevalence and Phenotype-Genotype Relationship.
pops_plus	26673204	20151218	9	apoe, apob, lipid, atherosclerosis, rbp4, abca1, pltp, cholesterol, apoa1	Proteomic analysis of HDL from inbred mouse strains implicates APOE associated with HDL in reduced cholesterol efflux capacity via the ABCA1 pathway.
pops_plus	26681771	20151219	9	coronary artery, atherosclerosis, coronary, ahr, stroke, pad, cholesterol, artery, cardiovascular	Heterogeneous impact of classic atherosclerotic risk factors on different arterial territories: the EPIC-Norfolk prospective population study.
pops_plus	26657055	20151215	9	cebpa, apob, lipid, hnf4a, triglyceride, mttp, fatty acid, triglycerides, trib1	Role of Tribbles Pseudokinase 1 (TRIB1) in human hepatocyte metabolism.
pops_plus	27471056	20160730	9	apob, lipid, coronary, stroke, cholesterol, artery, cardiovascular, triglycerides, coronary artery	Low-Density Lipoprotein Cholesterol, Non-High-Density Lipoprotein Cholesterol, Triglycerides, and Apolipoprotein B and Cardiovascular Risk in Patients With Manifest Arterial Disease.
pops_plus	10642431	20000121	9	heart, apoe, lipid, coronary heart, triglyceride, coronary, lipids, cholesterol, triglycerides	Apolipoprotein E genetic polymorphism, serum lipoproteins, and breast cancer risk.
pops_plus	24282409	20131128	9	heart, type 2 diabetes, coronary artery, atherosclerosis, cd36, coronary, artery, cardiovascular, diabetes	Potential biomarkers of insulin resistance and atherosclerosis in type 2 diabetes mellitus patients with coronary artery disease.
pops_plus	29259301	20171221	9	abcg1, apoe, atherosclerosis, triglyceride, hyperlipidemia, ldlr, abca1, cholesterol, cardiovascular	Global inactivation of carboxylesterase 1 (Ces1/Ces1g) protects against atherosclerosis in Ldlr <sup>-/-</sup> mice.
pops_plus	26481154	20151021	9	apob, lipid, coronary, met, lipids, cholesterol, artery, cardiovascular, coronary artery	Effect of glycemic and lipid achievements on clinical outcomes type 2 diabetic, Chinese patients with stable coronary artery disease.
pops_plus	26483964	20151021	9	heart, type 2 diabetes, apob, lipid, ldlr, hnf1a, cetp, diabetes, cardiovascular	Genomic Study of Cardiovascular Continuum Comorbidity.
pops_plus	26484979	20151021	9	gpam, vldlr, scd, cd36, lipid, lpl, fatty acid, fads1, lipids	Veterinary Medicine and Omics (Veterinomics): Metabolic Transition of Milk Triacylglycerol Synthesis in Sows from Late Pregnancy to Lactation.
pops_plus	9712344	19980826	9	heart, cetp, coronary artery, coronary heart, triglyceride, coronary, lipids, artery, lipid	Relationship of adipose tissue cholesteryl ester transfer protein (CETP) mRNA to plasma concentrations of CETP in man.
pops_plus	21347282	20110225	9	heart, coronary heart, abca1, coronary, lpl, pltp, cholesterol, fads1, diabetes	Genome-wide association study of coronary heart disease and its risk factors in 8,090 African Americans: the NHLBI CARe Project.
pops_plus	16399491	20060110	9	type 2 diabetes, apob, atherosclerosis, apoa1, fatty acid, cholesterol, cetp, triglycerides, diabetes	Modulation of plasma cholesteryl ester transfer protein activity by unsaturated fatty acids in Tunisian type 2 diabetic women.
pops_plus	32595280	20200630	9	heart, lipid, coronary heart, coronary, met, lipids, cholesterol, triglycerides, cardiovascular	Effect of Tree Nuts Consumption on Serum Lipid Profile in Hyperlipidemic Individuals: A Systematic Review.
pops_plus	27460359	20160728	9	heart, apob, lipid, coronary heart, coronary, lipids, cholesterol, artery, coronary artery	Prompt impact of first prospective statin mega-trials on postoperative lipid management of CABG patients: a 20-year follow-up in a single hospital.
pops_plus	18566665	20080621	9	heart, pcsk9, apob, coronary heart, atherosclerosis, coronary, ldlr, apoe, cholesterol	Common and rare gene variants affecting plasma LDL cholesterol.
pops_plus	11500189	20010814	9	heart, apob, lipid, coronary heart, triglyceride, coronary, cholesterol, triglycerides, cardiovascular	Association of the Sst-I polymorphism at the APOC3 gene locus with variations in lipid levels, lipoprotein subclass profiles and coronary heart disease risk: the Framingham offspring study.
pops_plus	17301496	20070216	9	type 2 diabetes, lipid, hp, atherosclerosis, fatty acid, cholesterol, diabetes, triglycerides, lipids	Effect of a novel insulinotropic agent, succinic acid monoethyl ester, on lipids and lipoproteins levels in rats with streptozotocin-nicotinamide-induced type 2 diabetes.
pops_plus	29198934	20171205	9	heart, lipid, acacb, coronary heart, atherosclerosis, triglyceride, coronary, cholesterol, cardiovascular	Novel polymorphisms associated with hyperalphalipoproteinemia and apparent cardioprotection.
pops_plus	21856482	20110823	9	heart, coronary artery, coronary heart, atherosclerosis, coronary, met, cholesterol, artery, cardiovascular	Associations between C-reactive protein, coronary artery calcium, and cardiovascular events: implications for the JUPITER population from MESA, a population-based cohort study.
pops_plus	21858147	20110823	9	lipc, coronary artery, ldlr, coronary, lipid, abca1, artery, cyp7a1, cardiovascular	Transcriptional profiling of human liver identifies sex-biased genes associated with polygenic dyslipidemia and coronary artery disease.
pops_plus	33642439	20210301	9	pcsk9, coronary artery, atherosclerosis, cd36, coronary, abcg5, cholesterol, artery, cardiovascular	A Resuscitated Case of Acute Myocardial Infarction with both Familial Hypercholesterolemia Phenotype Caused by Possibly Oligogenic Variants of the PCSK9 and ABCG5 Genes and Type I CD36 Deficiency.
pops_plus	32821707	20200822	9	heart, apob, lipid, atherosclerosis, coronary, cholesterol, artery, cardiovascular, coronary artery	The Potential Role of Biomarkers Associated with ASCVD Risk: Risk-Enhancing Biomarkers.
pops_plus	17966439	20071031	9	apob, lipid, lcat, triglyceride, coronary, cetp, cholesterol, artery, coronary artery	Reverse cholesterol transport and atherosclerosis. A mini review.
pops_plus	11755507	20020105	9	heart, type 2 diabetes, lipid, coronary heart, coronary, met, cholesterol, cardiovascular, diabetes	The effect of interventions to prevent cardiovascular disease in patients with type 2 diabetes mellitus.
pops_plus	33050984	20201014	9	abcg1, apoe, lipid, atherosclerosis, lipids, cholesterol, cyp7a1, apoa1, cardiovascular	Combined application of rapamycin and atorvastatin improves lipid metabolism in apolipoprotein E-deficient mice with chronic kidney disease.
pops_plus	33057387	20201015	9	heart, type 2 diabetes, coronary artery, coronary, ahr, stroke, artery, diabetes, cardiovascular	Dipeptidyl peptidase-4 inhibitors and cardiovascular events in patients with type 2 diabetes, without cardiovascular or renal disease.
pops_plus	33061298	20201016	9	abcg1, type 2 diabetes, lipid, atherosclerosis, cd36, abca1, cholesterol, diabetes, cardiovascular	DPP-4 Inhibitor Linagliptin Ameliorates Oxidized LDL-Induced THP-1 Macrophage Foam Cell Formation and Inflammation.
pops_plus	33066385	20201017	9	type 2 diabetes, lipid, hyperlipidemia, ldlr, lipids, hmgcr, cholesterol, triglycerides, diabetes	<i>Srebf2</i> Locus Overexpression Reduces Body Weight, Total Cholesterol and Glucose Levels in Mice Fed with Two Different Diets.
pops_plus	25873955	20150416	9	type 2 diabetes, coronary artery, coronary, hyperlipidemia, met, cholesterol, artery, cardiovascular, diabetes	Sex, Prescribing Practices and Guideline Recommended, Blood Pressure, and LDL Cholesterol Targets at Baseline in the BARI 2D Trial.
pops_plus	17001213	20060927	9	heart, lipid, coronary heart, triglyceride, coronary, lpl, cholesterol, cardiovascular, diabetes	Relationship of classical and non-classical risk factors with genetic variants relevant to coronary heart disease.
pops_plus	27488580	20160805	9	type 2 diabetes, apoe, lipid, atherosclerosis, abca1, fatty acid, cholesterol, triglycerides, diabetes	Testosterone differentially regulates targets of lipid and glucose metabolism in liver, muscle and adipose tissues of the testicular feminised mouse.
pops_plus	14998629	20040305	9	heart, cetp, lipid, coronary heart, atherosclerosis, coronary, lipids, cholesterol, cardiovascular	The cholesteryl ester transfer protein (CETP) TaqIB polymorphism in the cholesterol and recurrent events study: no interaction with the response to pravastatin therapy and no effects on cardiovascular outcome: a prospective analysis of the CETP TaqIB polymorphism on cardiovascular outcome and interaction with cholesterol-lowering therapy.
pops_plus	10412782	19990721	9	heart, type 2 diabetes, apob, lipid, triglyceride, coronary, cholesterol, cardiovascular, diabetes	Rationale and design of a trial improving outcome of type 2 diabetics on hemodialysis. Die Deutsche Diabetes Dialyse Studie Investigators.
pops_plus	20497463	20100526	9	cetp, coronary artery, coronary heart, atherosclerosis, triglyceride, coronary, cholesterol, artery, cardiovascular	Cholesteryl ester transfer protein in patients with coronary heart disease.
pops_plus	18307880	20080301	9	apoe, lipid, acox1, triglyceride, cd36, ldlr, angptl3, fatty acid, cholesterol	[Expression profiles of lipid metabolism-related genes in liver of apoE(-/-)/LDLR(-/-) mice].
pops_plus	11463413	20010721	9	heart, apoe, coronary artery, coronary heart, coronary, lipids, artery, cardiovascular, lipid	Apolipoprotein E4 and coronary heart disease in middle-aged men who smoke: a prospective study.
pops_plus	18937674	20081022	9	heart, type 2 diabetes, lipid, coronary heart, atherosclerosis, pon1, coronary, cardiovascular, diabetes	Glycation of paraoxonase-1 inhibits its activity and impairs the ability of high-density lipoprotein to metabolize membrane lipid hydroperoxides.
pops_plus	3181646	19881101	9	apob, lipid, triglyceride, apoa1, lipids, cholesterol, diabetes, triglycerides, fatty acid	Effect of fish oil concentrate on lipoprotein composition in NIDDM.
pops_plus	33343387	20201221	9	apob, lipid, pnpla2, cd36, pparg, lpl, fatty acid, ppara, srebf1	Lipid-Lowering Effects of Lotus Leaf Alcoholic Extract on Serum, Hepatopancreas, and Muscle of Juvenile Grass Carp via Gene Expression.
pops_plus	34899591	20211213	9	type 2 diabetes, apoe, apob, lipid, triglyceride, fatty acid, cholesterol, triglycerides, diabetes	Varied Relationship of Lipid and Lipoprotein Profiles to Liver Fat Content in Phenotypes of Metabolic Associated Fatty Liver Disease.
pops_plus	34901229	20211213	9	heart, lipid, coronary heart, coronary, met, lipids, cholesterol, triglycerides, cardiovascular	Effect of Sodium Tanshinone IIA Sulfonate Injection on Blood Lipid in Patients With Coronary Heart Disease: A Systematic Review and Meta-Analysis of Randomized Clinical Trials.
pops_plus	17094996	20061111	9	heart, pcsk9, apob, lipid, coronary heart, atherosclerosis, coronary, ldlr, ldlrap1	Genetic defects causing familial hypercholesterolaemia: identification of deletions and duplications in the LDL-receptor gene and summary of all mutations found in patients attending the Hammersmith Hospital Lipid Clinic.
pops_plus	34583624	20210929	9	tp53, pten, itpr2, foxo3, pparg, lipids, aco1, bcl2, fatty acid	The multifaceted regulation of mitophagy by endogenous metabolites.
pops_plus	28506386	20170517	9	heart, apob, lipid, coronary heart, triglyceride, coronary, cholesterol, cardiovascular, diabetes	Serum triglyceride, high-density lipoprotein cholesterol, apolipoprotein B, and coronary heart disease in a Chinese population undergoing coronary angiography.
pops_plus	28511322	20170517	9	heart, apob, lipid, coronary heart, coronary, coronary artery, cholesterol, artery, diabetes	[Interaction between APOB gene polymorphism and risk factors in coronary heart disease patients without lipid-lowering treatment].
pops_plus	25055851	20140725	9	coronary artery, fabp4, coronary, stroke, pad, fatty acid, cholesterol, artery, diabetes	Weight loss herbal intervention therapy (W-LHIT) a non-appetite suppressing natural product controls weight and lowers cholesterol and glucose levels in a murine model.
pops_plus	19168150	20090127	9	type 2 diabetes, apoe, apob, lpl, fatty acid, angptl4, diabetes, triglycerides, cardiovascular	Effect of plasma triglyceride metabolism on lipid storage in adipose tissue: studies using genetically engineered mouse models.
pops_plus	31336535	20190725	9	heart, coronary heart, atherosclerosis, bad, coronary, stroke, fatty acid, diabetes, cardiovascular	Trans fatty acids and lipid profile: A serious risk factor to cardiovascular disease, cancer and diabetes.
pops_plus	8068601	19940901	9	heart, apoe, apob, coronary heart, triglyceride, coronary, lipids, cholesterol, triglycerides	Impact of apolipoprotein E polymorphism on lipoproteins and risk of myocardial infarction. The ECTIM Study.
pops_plus	7820935	19940901	9	heart, cetp, coronary heart, triglyceride, coronary, lipids, cholesterol, triglycerides, diabetes	DNA polymorphisms at the locus for human cholesteryl ester transfer protein (CETP) are associated with macro- and microangiopathy in non-insulin-dependent diabetes mellitus.
pops_plus	23461430	20130307	9	heart, pcsk9, lipid, coronary heart, ldlr, coronary, stroke, cholesterol, cardiovascular	Management of familial hypercholesterolemia: a review of the recommendations from the National Lipid Association Expert Panel on Familial Hypercholesterolemia.
pops_plus	8279486	19931101	9	heart, apob, coronary artery, triglyceride, coronary, cetp, lpl, cholesterol, artery	Genetic contributions to quantitative lipoprotein traits associated with coronary artery disease: analysis of a large pedigree from the Bogalusa Heart Study.
pops_plus	9974428	19990212	9	apoe, apob, coronary artery, atherosclerosis, coronary, apoa1, cholesterol, artery, triglycerides	The relationship between risk factor levels and presence of coronary artery calcification is dependent on apolipoprotein E genotype.
pops_plus	26868195	20160213	9	type 2 diabetes, pcsk9, lipid, met, lipids, cholesterol, cardiovascular, triglycerides, diabetes	Lipid-lowering efficacy of the PCSK9 inhibitor evolocumab (AMG 145) in patients with type 2 diabetes: a meta-analysis of individual patient data.
pops_plus	10335875	19990521	9	heart, apoe, apob, coronary heart, triglyceride, coronary, lipids, cholesterol, fatty acid	Plasma lipids, lipoproteins and apolipoproteins and sudden cardiac death.
pops_plus	28030403	20161229	9	type 2 diabetes, atherosclerosis, triglyceride, hyperlipidemia, bad, cholesterol, cardiovascular, triglycerides, diabetes	CE: Triglycerides: Do They Matter?
pops_plus	27995417	20161221	9	abcg1, lipid, cd36, coronary, lipids, cholesterol, artery, cardiovascular, coronary artery	High-density lipoprotein from subjects with coronary artery disease promotes macrophage foam cell formation: role of scavenger receptor CD36 and ERK/MAPK signaling.
pops_plus	10523010	19991016	9	heart, apob, lipid, coronary heart, coronary, apoa1, cholesterol, cetp, triglycerides	Sex-dependent association of a genetic polymorphism of cholesteryl ester transfer protein with high-density lipoprotein cholesterol and macrovascular pathology in type II diabetic patients.
pops_plus	18823627	20081001	9	type 2 diabetes, cetp, lipid, lcat, coronary, stroke, lpl, lipids, diabetes	Association of lipoprotein lipase D9N polymorphism with myocardial infarction in type 2 diabetes: the genetics, outcomes, and lipids in type 2 diabetes (GOLD) study.
pops_plus	32393046	20200513	9	bcl2l11, cdkn1a, ahr, pten, vegfa, sort1, tp53, bcl2, cardiovascular	The expression of microRNAs and exposure to environmental contaminants related to human health: a review.
pops_plus	28555288	20170531	9	pcsk9, apob, lipid, atherosclerosis, triglyceride, ldlr, cholesterol, triglycerides, cardiovascular	[Congenital disorders of lipoprotein metabolism].
pops_plus	33257283	20201201	9	apob, lipid, coronary, coronary artery, rbp4, cholesterol, artery, cardiovascular, diabetes	Association of apolipoprotein C3 with insulin resistance and coronary artery calcium in patients with type 1 diabetes.
pops_plus	33269026	20201203	9	cubn, atherosclerosis, lcat, coronary, ldlr, srebf1, abca1, cholesterol, apoa1	HDL cholesterol is associated with PBMC expression of genes involved in HDL metabolism and atherogenesis.
pops_plus	16306375	20051125	9	type 2 diabetes, cetp, lipid, lipids, cholesterol, artery, cardiovascular, triglycerides, diabetes	Plasma cholesteryl ester transfer is a determinant of intima-media thickness in type 2 diabetic and nondiabetic subjects: role of CETP and triglycerides.
pops_plus	16822236	20060711	9	lipc, cetp, lipid, atherosclerosis, triglyceride, coronary, cholesterol, artery, coronary artery	CETP (cholesteryl ester transfer protein) promoter -1337 C&gt;T polymorphism protects against coronary atherosclerosis in Japanese patients with heterozygous familial hypercholesterolaemia.
pops_plus	23443242	20130228	9	heart, type 2 diabetes, coronary heart, coronary, met, stroke, lipids, diabetes, cardiovascular	Leisure-time physical activity is a significant predictor of stroke and total mortality in Japanese patients with type 2 diabetes: analysis from the Japan Diabetes Complications Study (JDCS).
pops_plus	19667307	20090812	9	heart, apoe, coronary heart, coronary, lipids, cholesterol, cardiovascular, triglycerides, diabetes	APOE genotype, lipids, and coronary heart disease risk: a prospective population study.
pops_plus	24506864	20140211	9	igf1r, igf1, apob, lipid, sp1, atherosclerosis, hyperlipidemia, lipids, cholesterol	The combined hyperlipidemia caused by impaired Wnt-LRP6 signaling is reversed by Wnt3a rescue.
pops_plus	24507774	20140211	9	heart, pcsk9, col18a1, coronary heart, pcsk7, coronary, lipids, cholesterol, triglycerides	Association of low-frequency and rare coding-sequence variants with blood lipids and coronary heart disease in 56,000 whites and blacks.
pops_plus	9437215	19980123	9	type 2 diabetes, apob, lipid, triglyceride, coronary, coronary artery, cholesterol, artery, diabetes	The severity of coronary atherosclerosis in type 2 diabetes mellitus is related to the number of circulating triglyceride-rich lipoprotein particles.
pops_plus	34118252	20210612	9	pcsk9, apob, lipid, atherosclerosis, triglyceride, ldlr, lipids, cholesterol, surf4	Atherosclerosis-associated hepatic secretion of VLDL but not PCSK9 is dependent on cargo receptor protein Surf4.
pops_plus	11996959	20020509	9	heart, type 2 diabetes, coronary artery, cyp1a1, atherosclerosis, coronary, artery, cardiovascular, diabetes	Effect of CYP1A1 MspI polymorphism on cigarette smoking related coronary artery disease and diabetes.
pops_plus	11994249	20020508	9	cetp, coronary artery, atherosclerosis, coronary, hyperlipidemia, lipids, cholesterol, artery, triglycerides	Efficacy and safety of a novel cholesteryl ester transfer protein inhibitor, JTT-705, in humans: a randomized phase II dose-response study.
pops_plus	11246452	20010314	9	lipid, atherosclerosis, triglyceride, coronary, lpl, lipids, cholesterol, artery, coronary artery	Analysis of lipoprotein lipase haplotypes reveals associations not apparent from analysis of the constituent loci.
pops_plus	31729950	20191116	9	lipid, scd, cd36, pparg, fabp4, lpl, cholesterol, triglycerides, dhcr24	Transcriptional insights into key genes and pathways controlling muscle lipid metabolism in broiler chickens.
pops_plus	31706732	20191111	9	heart, lipid, coronary heart, por, coronary, cholesterol, cardiovascular, triglycerides, diabetes	Suboptimal lipid levels in clinical practice among Portuguese adults with dyslipidemia under lipid-lowering therapy: Data from the DISGEN-LIPID study.
pops_plus	31713012	20191113	9	type 2 diabetes, lipid, coronary, pnpla3, coronary artery, lipids, artery, cardiovascular, diabetes	Non-alcoholic fatty liver disease and cardiovascular disease: assessing the evidence for causality.
pops_plus	31709322	20191112	9	heart, lipid, coronary heart, atherosclerosis, coronary, hyperlipidemia, angptl3, cholesterol, triglycerides	Angiopoietin-Like 3: From Discovery to Therapeutic Gene Editing.
pops_plus	27459037	20160727	9	lipid, triglyceride, hyperlipidemia, ldlr, lipids, hmgcr, cholesterol, cyp7a1, cardiovascular	Hypolipidemic effects of Myrica rubra extracts and main compounds in C57BL/6j mice.
pops_plus	27929393	20161209	9	type 2 diabetes, abcg5, sod1, fatty acid, hmgcr, cholesterol, cyp7a1, triglycerides, diabetes	Xylobiose, an Alternative Sweetener, Ameliorates Diabetes-Related Metabolic Changes by Regulating Hepatic Lipogenesis and miR-122a/33a in db/db Mice.
pops_plus	33909604	20210428	9	type 2 diabetes, lipid, triglyceride, coronary, coronary artery, artery, angptl4, dyslipidemias, diabetes	ANGPTL8 protein-truncating variant associated with lower serum triglycerides and risk of coronary disease.
pops_plus	28705542	20170715	9	pcsk9, apob, coronary artery, coronary, apoe, lpl, sort1, artery, cardiovascular	Effect of Coronary Artery Disease risk SNPs on serum cytokine levels and cytokine imbalance in Premature Coronary Artery Disease.
pops_plus	35174233	20220217	9	cetp, lipid, atherosclerosis, aldh2, coronary, cholesterol, artery, cardiovascular, coronary artery	Genetic Determinants of Visit-to-Visit Lipid Variability: Genome-Wide Association Study in Statin-Na√Øve Korean Population.
pops_plus	35174364	20220217	9	coronary artery, atherosclerosis, coronary, atp2b1, lipid, sort1, artery, ski, cardiovascular	Intersecting single-cell transcriptomics and genome-wide association studies identifies crucial cell populations and candidate genes for atherosclerosis.
pops_plus	23919842	20130808	9	heart, apoe, lipid, coronary heart, coronary, lipids, cholesterol, triglycerides, dyslipidemias	Association between APOE, SCARB1, PPARŒ± polymorphisms and serum lipids in a population of Lithuanian adults.
pops_plus	18676970	20080805	9	heart, apob, lipid, coronary heart, coronary, lipids, cholesterol, cardiovascular, diabetes	Concentration of apolipoprotein B is comparable with the apolipoprotein B/apolipoprotein A-I ratio and better than routine clinical lipid measurements in predicting coronary heart disease mortality: findings from a multi-ethnic US population.
pops_plus	27872105	20161123	9	heart, apoe, apob, coronary artery, coronary heart, atherosclerosis, coronary, cholesterol, artery	Multiethnic Exome-Wide Association Study of Subclinical Atherosclerosis.
pops_plus	12547874	20030128	9	type 2 diabetes, lipid, lipc, coronary, coronary artery, cholesterol, artery, triglycerides, diabetes	Atorvastatin dose-dependently decreases hepatic lipase activity in type 2 diabetes: effect of sex and the LIPC promoter variant.
pops_plus	26162692	20150712	9	type 2 diabetes, lipid, atherosclerosis, ldlr, fatty acid, cholesterol, diabetes, triglycerides, lipids	TLR4 antagonist attenuates atherogenesis in LDL receptor-deficient mice with diet-induced type 2 diabetes.
pops_plus	11229885	20010307	9	heart, lipid, coronary heart, coronary, hyperlipidemia, ldlr, fatty acid, triglycerides, diabetes	Postprandial lipoproteins and atherosclerosis.
pops_plus	14984434	20040227	9	cetp, lipid, atherosclerosis, coronary, lipids, cholesterol, artery, triglycerides, coronary artery	Cholesteryl ester transfer protein concentration is associated with progression of atherosclerosis and response to pravastatin in men with coronary artery disease (REGRESS).
pops_plus	31993549	20200130	9	pcsk9, apob, lipid, ldlrap1, met, ldlr, lipids, triglycerides, cardiovascular	Molecular Characterization of Familial Hypercholesterolemia in a North American Cohort.
pops_plus	31996021	20200131	9	heart, apoe, lipid, coronary heart, atherosclerosis, triglyceride, coronary, ldlr, cholesterol	IgE Contributes to Atherosclerosis and Obesity by Affecting Macrophage Polarization, Macrophage Protein Network, and Foam Cell Formation.
pops_plus	31210329	20190619	9	apoe, coronary artery, coronary heart, atherosclerosis, kit, pten, ldlr, artery, coronary	Downregulated miRNA-26a-5p induces the apoptosis of endothelial cells in coronary heart disease by inhibiting PI3K/AKT pathway.
pops_plus	23528829	20130327	9	heart, apoe, lipid, coronary heart, atherosclerosis, coronary, cholesterol, artery, coronary artery	The effect of pomegranate extract on coronary artery atherosclerosis in SR-BI/APOE double knockout mice.
pops_plus	25477346	20141206	9	heart, apob, lipid, coronary heart, atherosclerosis, coronary, lipids, cholesterol, cardiovascular	Use of lipoprotein particle measures for assessing coronary heart disease risk post-American Heart Association/American College of Cardiology guidelines: the Multi-Ethnic Study of Atherosclerosis.
pops_plus	30787327	20190222	9	heart, trps1, lipid, coronary heart, triglyceride, coronary, stroke, trib1, cholesterol	TRIB1 and TRPS1 variants, G‚Äâ√ó‚ÄâG and G‚Äâ√ó‚ÄâE interactions on serum lipid levels, the risk of coronary heart disease and ischemic stroke.
pops_plus	15777551	20050322	9	heart, apob, coronary heart, atherosclerosis, coronary, lipids, cholesterol, triglycerides, cardiovascular	Differences between markers of atherogenic lipoproteins in predicting high cardiovascular risk and subclinical atherosclerosis in asymptomatic men.
pops_plus	11181756	20010222	9	lipc, apob, lipid, coronary, lipids, cholesterol, artery, triglycerides, coronary artery	Promoter polymorphisms of hepatic lipase gene influence HDL(2) but not HDL(3) in African American men: CARDIA study.
pops_plus	15320783	20040824	9	apoe, lipid, atherosclerosis, abca1, lipids, cholesterol, diabetes, apoa1, cardiovascular	Atherosclerosis -- new targets and therapeutics.
pops_plus	15320848	20040824	9	heart, lipid, coronary heart, atherosclerosis, triglyceride, coronary, lpl, cholesterol, triglycerides	Lipoprotein lipase and atherosclerosis.
pops_plus	18476573	20080515	9	heart, apob, lipid, coronary heart, triglyceride, coronary, lipids, cholesterol, apoa1	[Study on the relationship between passive smoking and blood lipids, fibrinogen and viscosity among women who never smoke].
pops_plus	27775783	20161025	9	heart, coronary heart, triglyceride, coronary, hyperlipidemia, rbp4, fatty acid, cholesterol, cardiovascular	Significance of change of retinol binding protein 4 level of plasma of patients with coronary heart disease complicated with hyperlipidemia.
pops_plus	24148690	20131024	9	heart, lipid, coronary heart, atherosclerosis, triglyceride, coronary, cholesterol, kit, cardiovascular	The role of 14,15-dihydroxyeicosatrienoic acid levels in inflammation and its relationship to lipoproteins.
pops_plus	15028851	20040319	9	type 2 diabetes, apoe, lipid, atherosclerosis, triglyceride, lipids, cholesterol, triglycerides, diabetes	Microsomal triglyceride transfer protein polymorphisms and lipoprotein levels in type 2 diabetes.
pops_plus	11861414	20020228	9	heart, apoe, lipid, coronary heart, atherosclerosis, coronary, cholesterol, artery, coronary artery	Loss of SR-BI expression leads to the early onset of occlusive atherosclerotic coronary artery disease, spontaneous myocardial infarctions, severe cardiac dysfunction, and premature death in apolipoprotein E-deficient mice.
pops_plus	28636844	20170622	9	heart, tet2, asxl1, coronary heart, atherosclerosis, coronary, jak2, artery, cardiovascular	Clonal Hematopoiesis and Risk of Atherosclerotic Cardiovascular Disease.
pops_plus	28637178	20170623	9	heart, pcsk9, cetp, coronary heart, atherosclerosis, coronary, apoe, lipids, cholesterol	The AT04A vaccine against proprotein convertase subtilisin/kexin type 9 reduces total cholesterol, vascular inflammation, and atherosclerosis in APOE*3Leiden.CETP mice.
pops_plus	27100454	20160422	9	heart, lipid, coronary, hyperlipidemia, stroke, artery, diabetes, ahr, coronary artery	Subtotal Gastrectomy With Billroth II Anastomosis Is Associated With a Low Risk of Ischemic Stroke in Peptic Ulcer Disease Patients: A Nationwide Population-Based Study.
pops_plus	27114411	20160427	9	heart, coronary heart, atherosclerosis, triglyceride, coronary, lpl, lipids, cholesterol, fatty acid	Metabolic Characterization of a Rare Genetic Variation Within APOC3 and Its Lipoprotein Lipase-Independent Effects.
pops_plus	18221079	20080129	9	cetp, lipid, atherosclerosis, coronary, cholesterol, artery, cardiovascular, triglycerides, coronary artery	New approaches to atherosclerotic cardiovascular disease. the potentialities of torcetrapib.
pops_plus	33602190	20210219	9	heart, type 2 diabetes, coronary artery, coronary, ahr, stroke, artery, diabetes, cardiovascular	Long-term outcomes of adding alpha-glucosidase inhibitors in insulin-treated patients with type 2 diabetes.
pops_plus	12235178	20020918	9	apoe, apob, coronary artery, atherosclerosis, triglyceride, coronary, hyperlipidemia, cholesterol, artery	Effect of atorvastatin on plasma apoE metabolism in patients with combined hyperlipidemia.
pops_plus	18648394	20080724	9	pcsk9, apob, lipid, coronary, ldlr, coronary artery, cholesterol, artery, cardiovascular	LDLR promoter variant and exon 14 mutation on the same chromosome are associated with an unusually severe FH phenotype and treatment resistance.
pops_plus	34719140	20211031	9	acacb, mlxipl, scd, gck, pparg, srebf1, fatty acid, ppara, actb	[Liver gene expression in normal and obese rats received resveratrol and L-carnitine].
pops_plus	30704063	20190202	9	type 2 diabetes, lipid, acox1, ldlr, fatty acid, hmgcr, cholesterol, triglycerides, diabetes	Hypoglycemic and Hypolipidemic Effects of <i>Phellinus Linteus</i> Mycelial Extract from Solid-State Culture in A Rat Model of Type 2 Diabetes.
pops_plus	11730822	20011204	9	heart, apoe, apob, lipid, coronary heart, coronary, fatty acid, cholesterol, lipids	Association of the A/T54 polymorphism in the intestinal fatty acid binding protein with variations in plasma lipids in the Framingham Offspring Study.
pops_plus	8946271	19960801	9	apob, lipid, triglyceride, coronary, lipids, cholesterol, artery, triglycerides, coronary artery	Relationship of lipoproteins, apolipoproteins, triglycerides and lipid ratios to plasma total cholesterol in young adults: the CARDIA Study. Coronary Artery Risk Development in Young Adults.
pops_plus	29728394	20180506	9	heart, cetp, lipid, coronary, lipids, cholesterol, artery, cardiovascular, coronary artery	CETP (Cholesteryl Ester Transfer Protein) Concentration: A Genome-Wide Association Study Followed by Mendelian Randomization on Coronary Artery Disease.
pops_plus	29706812	20180501	9	heart, type 2 diabetes, pcsk9, atherosclerosis, coronary, stroke, cholesterol, diabetes, cardiovascular	Usefulness of alirocumab and evolocumab for the treatment of patients with diabetic dyslipidemia.
pops_plus	29708925	20180501	9	type 2 diabetes, apoe, hnf4a, pnpla3, hmgcr, cholesterol, diabetes, triglycerides, cardiovascular	Unexplained reciprocal regulation of diabetes and lipoproteins.
pops_plus	22556142	20120505	9	tgfb1, lipid, abcb4, cyp27a1, fatty acid, hmgcr, cholesterol, nfkb1, triglycerides	Steatohepatitis in laboratory opossums exhibiting a high lipemic response to dietary cholesterol and fat.
pops_plus	17652266	20070727	9	apob, lipid, atherosclerosis, coronary, hyperlipidemia, cardiovascular, artery, diabetes, coronary artery	Diabetes and arterial extracellular matrix changes in a porcine model of atherosclerosis.
pops_plus	16086925	20050810	9	cetp, coronary artery, abca1, coronary, lpl, lipids, cholesterol, artery, triglycerides	Candidate gene susceptibility variants predict intermediate end points but not angiographic coronary artery disease.
pops_plus	20964105	20101023	9	heart, pcsk9, apob, lipid, coronary heart, coronary, ldlr, cholesterol, cardiovascular	Molecular diagnosis of familial hypercholesterolemia: an important tool for cardiovascular risk stratification.
pops_plus	9489234	19980307	9	apob, lipid, triglyceride, coronary, lpl, cholesterol, artery, triglycerides, coronary artery	Genetic markers in coronary artery disease in a Russian population.
pops_plus	17485234	20070509	9	type 2 diabetes, lipid, fabp1, triglyceride, fatty acid, cholesterol, cardiovascular, triglycerides, diabetes	L-FABP T94A is associated with fasting triglycerides and LDL-cholesterol in women.
pops_plus	11273849	20010329	9	apoe, lipid, coronary, coronary artery, fatty acid, cholesterol, artery, diabetes, lipids	APOE polymorphism and the hypertriglyceridemic effect of dietary sucrose.
pops_plus	28935967	20170923	9	heart, apoe, coronary heart, atherosclerosis, coronary, lipids, artery, mif, cardiovascular	MircroRNA-19a promotes vascular inflammation and foam cell formation by targeting HBP-1 in atherogenesis.
pops_plus	18591462	20080702	9	heart, apoe, coronary heart, coronary, stroke, lipids, cholesterol, triglycerides, diabetes	Low HDL cholesterol is a risk factor for deficit and decline in memory in midlife: the Whitehall II study.
pops_plus	34657601	20211018	9	heart, apob, lipid, coronary heart, coronary, hyperlipidemia, cholesterol, cardiovascular, diabetes	Non-invasive skin cholesterol testing: a potential proxy for LDL-C and apoB serum measurements.
pops_plus	10639897	20000120	9	heart, coronary artery, coronary heart, atherosclerosis, peripheral vascular, coronary, met, artery, cardiovascular	Hyperhomocysteinemia: an additional cardiovascular risk factor.
pops_plus	34450194	20210827	9	tnks, lipid, atherosclerosis, type ii diabetes, hyperlipidemia, fatty acid, cholesterol, cardiovascular, diabetes	PARPs in lipid metabolism and related diseases.
pops_plus	34445501	20210827	9	abcg1, stat3, lipid, atherosclerosis, abca1, jak2, cholesterol, diabetes, cardiovascular	Rosmarinic Acid Increases Macrophage Cholesterol Efflux through Regulation of ABCA1 and ABCG1 in Different Mechanisms.
pops_plus	34447653	20210827	9	pcsk9, lipid, atherosclerosis, hyperlipidemia, cholesterol, cardiovascular, triglycerides, dyslipidemias, diabetes	<i>PCSK9</i> Gene Participates in the Development of Primary Dyslipidemias.
pops_plus	32875580	20200903	9	pcsk9, lipid, atherosclerosis, coronary, ldlr, cholesterol, artery, cardiovascular, coronary artery	Physiology and role of PCSK9 in vascular disease: Potential impact of localized PCSK9 in vascular wall.
pops_plus	10092998	19990327	9	heart, cetp, coronary artery, coronary heart, atherosclerosis, coronary, lipids, cholesterol, artery	Cholesteryl ester transfer protein gene effect on CETP activity and plasma high-density lipoprotein in European populations. The EARS Group.
pops_plus	29785212	20180523	9	heart, pcsk9, lipid, coronary heart, atherosclerosis, coronary, lipids, cholesterol, cardiovascular	Reduction of Vascular Inflammation, LDL-C, or Both for the Protection from Cardiovascular Events?
pops_plus	15673344	20050128	9	heart, apoe, lipid, triglyceride, stroke, lipids, cholesterol, triglycerides, diabetes	Relationship between plasma lipids and all-cause mortality in nondemented elderly.
pops_plus	28132397	20170130	9	heart, type 2 diabetes, pcsk9, apob, lipid, cholesterol, diabetes, triglycerides, cardiovascular	Treatment of Dyslipidemias to Prevent Cardiovascular Disease in Patients with Type 2 Diabetes.
pops_plus	18781598	20080911	9	heart, coronary artery, atherosclerosis, coronary, pparg, lipids, artery, cardiovascular, diabetes	Reassessing the cardiovascular risks and benefits of thiazolidinediones.
pops_plus	20360257	20100403	9	heart, apom, apoe, coronary heart, atherosclerosis, coronary, ldlr, lrp1, cholesterol	Opposing effects of apolipoprotein m on catabolism of apolipoprotein B-containing lipoproteins and atherosclerosis.
pops_plus	32660911	20200715	9	pcsk9, apob, lipid, met, ldlr, apoe, cholesterol, ldlrap1, cardiovascular	Diagnostic yield of sequencing familial hypercholesterolemia genes in individuals with primary hypercholesterolemia.
pops_plus	24895164	20140605	9	heart, lipid, triglyceride, coronary, trib1, cholesterol, artery, triglycerides, coronary artery	Functional analysis of the TRIB1 associated locus linked to plasma triglycerides and coronary artery disease.
pops_plus	10971448	20000906	9	heart, lipid, coronary heart, coronary, lpl, lipids, cholesterol, triglycerides, cardiovascular	Effects of normalization of GH hypersecretion on lipoprotein(a) and other lipoprotein serum levels in acromegaly.
pops_plus	12475897	20021212	9	heart, apoe, lipid, coronary heart, coronary, ldlr, cholesterol, cyp7a1, triglycerides	Pharmacological interference with intestinal bile acid transport reduces plasma cholesterol in LDL receptor/apoE deficiency.
pops_plus	23652567	20130509	9	heart, apoe, apob, lipid, coronary heart, triglyceride, coronary, cholesterol, cetp	Effects of cholesteryl ester transfer protein inhibitors on human lipoprotein metabolism: why have they failed in lowering coronary heart disease risk?
pops_plus	15177121	20040605	9	apoe, lipid, abca1, triglyceride, coronary, cholesterol, artery, apoa1, coronary artery	Triglyceride-rich lipoproteins inhibit cholesterol efflux to apolipoprotein (apo) A1 from human macrophage foam cells.
pops_plus	15177518	20040605	9	heart, f2, coronary heart, coronary, lipids, cholesterol, artery, triglycerides, cardiovascular	Angiotensin receptor blockade improves arterial distensibility and reduces exercise-induced pressor responses in obese hypertensive patients with the metabolic syndrome.
pops_plus	23021345	20121002	9	cyp1a1, lipc, apoe, apob, lipid, cholesterol, abca1, cetp, apoa1	Gene-diet interactions on plasma lipid levels in the Inuit population.
pops_plus	16630995	20060425	9	heart, coronary heart, coronary, met, stroke, pad, cholesterol, diabetes, cardiovascular	Prevalence of the metabolic syndrome and its relation to cardiovascular disease in an elderly Chinese population.
pops_plus	16634114	20060425	9	type 2 diabetes, apoe, apob, atherosclerosis, triglyceride, ldlr, fatty acid, artery, diabetes	Electronegative low-density lipoprotein subfraction from type 2 diabetic subjects is proatherogenic and unrelated to glycemic control.
pops_plus	26571137	20151117	9	pck1, sumo1, scd, irs1, pparg, insr, srebf1, fatty acid, ppara	Insulin Sensitivity in Adipose and Skeletal Muscle Tissue of Dairy Cows in Response to Dietary Energy Level and 2,4-Thiazolidinedione (TZD).
pops_plus	20161568	20100218	9	apob, lipid, atherosclerosis, met, lipids, cholesterol, artery, triglycerides, cardiovascular	PREVENTION OF ATHEROSCLEROSIS WITH LDL-C LOWERING - LIPOPROTEIN CHANGES AND INTERACTIONS: THE SANDS STUDY.
pops_plus	29587349	20180329	9	acox1, lipid, hp, cholesterol, npc1, apoe, fatty acid, abca1, lipids	Evaluation of Two Liver Treatment Strategies in a Mouse Model of Niemann-Pick-Disease Type C1.
pops_plus	31378838	20190806	9	pcsk9, cetp, coronary artery, atherosclerosis, coronary, artery, triglycerides, dyslipidemias, cardiovascular	Optimizing Dyslipidemia Management for the Prevention of Cardiovascular Disease: a Focus on Risk Assessment and Therapeutic Options.
pops_plus	31391715	20190809	9	apob, lipid, coronary, apoa1, cholesterol, artery, triglycerides, dyslipidemias, coronary artery	Non-HDL as a Valid Surrogate Marker of Small Dense LDL in a Young Indian Population.
pops_plus	12795642	20030611	9	apoe, triglyceride, cd36, type ii diabetes, lipids, cholesterol, diabetes, triglycerides, fatty acid	Fatty acids modulate the effect of darglitazone on macrophage CD36 expression.
pops_plus	23840567	20130711	9	heart, srebf1, lipid, mlxipl, coronary heart, coronary, mlxip, nr1h3, diabetes	The Association Study between Twenty One Polymorphisms in Seven Candidate Genes and Coronary Heart Diseases in Chinese Han Population.
pops_plus	10781648	20000427	9	type 2 diabetes, apoe, apob, lipid, triglyceride, coronary, coronary artery, lipids, diabetes	Postprandial metabolism of apolipoprotein B-48- and B-100-containing particles in type 2 diabetes mellitus: relations to angiographically verified severity of coronary artery disease.
pops_plus	16786033	20060621	9	apoe, lipid, atherosclerosis, coronary, coronary artery, cholesterol, artery, cardiovascular, diabetes	Apolipoprotein E, cholesterol metabolism, diabetes, and the convergence of risk factors for Alzheimer's disease and cardiovascular disease.
pops_plus	28882587	20170909	9	apoe, apob, lipid, triglyceride, coronary, cholesterol, artery, cardiovascular, coronary artery	Low levels of apolipoprotein-CII in normotriglyceridemic patients with very premature coronary artery disease: Observations from the MISSION! Intervention study.
pops_plus	22410123	20120314	9	apob, lipid, atherosclerosis, apoa1, lipids, cholesterol, cardiovascular, triglycerides, diabetes	Lipid-altering efficacy of ezetimibe plus statin and statin monotherapy and identification of factors associated with treatment response: a pooled analysis of over 21,000 subjects from 27 clinical trials.
pops_plus	18644789	20080723	9	apoe, apob, lipid, atherosclerosis, triglyceride, hyperlipidemia, fatty acid, cholesterol, triglycerides	Lipolysis stimulated lipoprotein receptor: a novel molecular link between hyperlipidemia, weight gain, and atherosclerosis in mice.
pops_plus	29103916	20171107	9	heart, pcsk9, lipid, coronary heart, type ii diabetes, coronary, cholesterol, cardiovascular, diabetes	Effect of atorvastatin, cholesterol ester transfer protein inhibition, and diabetes mellitus on circulating proprotein subtilisin kexin type 9 and lipoprotein(a) levels in patients at high cardiovascular risk.
pops_plus	19851103	20091024	9	lipid, atherosclerosis, triglyceride, coronary, angptl4, angptl3, cholesterol, triglycerides, cardiovascular	Impacts of angiopoietin-like proteins on lipoprotein metabolism and cardiovascular events.
pops_plus	32726030	20200730	9	heart, acox1, cetp, lipid, atherosclerosis, lcat, triglyceride, hyperlipidemia, cholesterol	[Lipid-lowering effect and mechanism of Danhong Injection on hyperlipidemia rats based on lipid metabolism disorder].
pops_plus	26642235	20151208	9	apoe, coronary artery, atherosclerosis, ldlr, coronary, akt1, stroke, artery, cardiovascular	HDL signaling and protection against coronary artery atherosclerosis in mice.
pops_plus	10866057	20000624	9	type 2 diabetes, apob, lipid, coronary, coronary artery, fatty acid, cholesterol, artery, diabetes	Anti-modified LDL antibodies, LDL-containing immune complexes, and susceptibility of LDL to in vitro oxidation in patients with type 2 diabetes.
pops_plus	24594088	20140306	9	heart, type 2 diabetes, coronary artery, coronary, hyperlipidemia, cd14, artery, cardiovascular, diabetes	Circulating endothelial progenitor cells as markers for severity of ischemic chronic heart failure.
pops_plus	10996354	20000921	9	cetp, lipid, atherosclerosis, lcat, triglyceride, coronary, cholesterol, artery, coronary artery	Alterations in the main steps of reverse cholesterol transport in male patients with primary hypertriglyceridemia and low HDL-cholesterol levels.
pops_plus	2087075	19900101	9	heart, cetp, coronary heart, atherosclerosis, lcat, triglyceride, coronary, hyperlipidemia, cholesterol	[Role of hepatic lipases, cholesterol ester transfer proteins and LCAT in the postprandial phase].
pops_plus	23078847	20121020	9	coronary artery, hp, peripheral vascular, coronary, hyperlipidemia, stroke, artery, apoa1, diabetes	Oxidized ApoC1 on MALDI-TOF and glycated-ApoA1 band on gradient gel as potential diagnostic tools for atherosclerotic vascular disease.
pops_plus	23080092	20121020	9	apob, lipid, atherosclerosis, coronary, lipids, cholesterol, artery, apoa1, coronary artery	Association between insulin like growth factor-1 and lipoprotein metabolism in stable angina patients on statin therapy: a pilot study.
pops_plus	9365344	19971120	9	heart, apob, lipid, coronary heart, coronary, apoa1, lipids, cholesterol, triglycerides	Lipid, lipoprotein, and apolipoprotein profiles in active and sedentary men with tetraplegia.
pops_plus	17510505	20070519	9	heart, type 2 diabetes, coronary heart, hp, coronary, stroke, artery, diabetes, cardiovascular	Pulse wave velocity as a marker of arteriosclerosis and its comorbidities in Chinese patients.
pops_plus	34986301	20220105	9	apoe, lipid, atherosclerosis, triglyceride, cd36, lipids, cholesterol, triglycerides, fatty acid	The Effects of PPAR Agonists on Atherosclerosis and Nonalcoholic Fatty Liver Disease in ApoE-/-FXR-/- Mice.
pops_plus	29501765	20180305	9	type 2 diabetes, lipid, lcat, triglyceride, ahr, hmgcr, cholesterol, lipc, diabetes	Naringin enhances reverse cholesterol transport in high fat/low streptozocin induced diabetic rats.
pops_plus	21087152	20101120	9	heart, type 2 diabetes, vldlr, atherosclerosis, triglyceride, hyperlipidemia, cholesterol, cardiovascular, diabetes	The therapeutic role of very low-density lipoprotein receptor gene in hyperlipidemia in type 2 diabetic rats.
pops_plus	31460992	20190829	9	type 2 diabetes, coronary artery, atherosclerosis, ccs, coronary, cholesterol, artery, cardiovascular, diabetes	Association of serum carbohydrate antigen 19-9 level with arterial stiffness and coronary artery calcification in middle-aged and older adults: a cross-sectional study.
pops_plus	34291051	20210722	9	apoe, lipid, atherosclerosis, cd36, coronary, cholesterol, artery, cardiovascular, coronary artery	TDP43 Exacerbates Atherosclerosis Progression by Promoting Inflammation and Lipid Uptake of Macrophages.
pops_plus	12086920	20020628	9	apob, coronary artery, atherosclerosis, coronary, lipid, pltp, lipids, artery, diabetes	The effect of phospholipid transfer protein on lipoprotein metabolism and atherosclerosis.
pops_plus	20334678	20100326	9	type 2 diabetes, apob, lipid, triglyceride, coronary, coronary artery, artery, triglycerides, diabetes	PPARgamma gene C161T substitution alters lipid profile in Chinese patients with coronary artery disease and type 2 diabetes mellitus.
pops_plus	15222761	20040630	9	apob, lipid, coronary, fatty acid, cholesterol, artery, cardiovascular, triglycerides, coronary artery	Dioxin alters the human low-density and very low-density lipoprotein structure with evidence for specific quenching of Trp-48 in apolipoprotein C-II.
pops_plus	15223224	20040630	9	type 2 diabetes, coronary artery, triglyceride, coronary, met, cholesterol, artery, cardiovascular, diabetes	Cardiovascular risk factors in patients with type 2 diabetes. Do we follow the guidelines?
pops_plus	29183091	20171129	9	heart, type 2 diabetes, coronary heart, coronary, met, pad, artery, diabetes, cardiovascular	Systematic Review of the Epidemiology and Natural History of the Metabolic Vascular Syndrome and its Coincidence with Type 2 Diabetes Mellitus and Cardiovascular Diseases in Different European Countries.
pops_plus	29152661	20171121	9	type 2 diabetes, apoe, apob, lipid, apom, triglyceride, lipids, diabetes, cardiovascular	Apolipoprotein status in type 2 diabetes mellitus and its complications (Review).
pops_plus	18333357	20080313	9	heart, apob, lipid, coronary heart, coronary, cholesterol, cardiovascular, triglycerides, diabetes	Apolipoproteins A-I and B-markers in coronary risk evaluation.
pops_plus	18333887	20080313	9	heart, apob, lipid, coronary heart, triglyceride, coronary, cholesterol, apoa1, cardiovascular	The contribution of ApoB and ApoA1 measurements to cardiovascular risk assessment.
pops_plus	18336240	20080314	9	heart, apoe, coronary artery, coronary heart, atherosclerosis, coronary, artery, cardiovascular, lipid	Myocardial infarction following atherosclerosis in murine models.
pops_plus	25383754	20141111	9	lipid, acox1, hyperlipidemia, pnpla2, fabp4, srebf1, fatty acid, fabp1, diabetes	Icariin is a PPARŒ± activator inducing lipid metabolic gene expression in mice.
pops_plus	33166319	20201109	9	type 2 diabetes, pcsk9, coronary artery, coronary, stroke, pad, cholesterol, artery, diabetes	PCSK9 loss of function is protective against extra-coronary atherosclerotic cardiovascular disease in a large multi-ethnic cohort.
pops_plus	31189741	20190614	9	apob, lipid, triglyceride, type ii diabetes, rbp4, cholesterol, cetp, apoa1, diabetes	Efficacy and adverse reaction to different doses of atorvastatin in the treatment of type II diabetes mellitus.
pops_plus	28128573	20170128	9	heart, pcsk9, apob, lipid, coronary heart, coronary, ldlr, cholesterol, ldlrap1	[Molecular genetics of hypercholesterolemia].
pops_plus	16374627	20051224	9	type 2 diabetes, lipid, atherosclerosis, pltp, cholesterol, artery, cardiovascular, triglycerides, diabetes	Elevated plasma phospholipid transfer protein activity is a determinant of carotid intima-media thickness in type 2 diabetes mellitus.
pops_plus	31860674	20191221	9	heart, cetp, lipid, coronary heart, triglyceride, coronary, hmgcr, cholesterol, triglycerides	Lipoprotein signatures of cholesteryl ester transfer protein and HMG-CoA reductase inhibition.
pops_plus	30526614	20181212	9	apoe, coronary artery, atherosclerosis, triglyceride, coronary, cholesterol, artery, cardiovascular, diabetes	Associations between epicardial adipose tissue, subclinical atherosclerosis and high-density lipoprotein composition in type 1 diabetes.
pops_plus	23285120	20130104	9	apoe, lipid, atherosclerosis, triglyceride, ldlr, fatty acid, cholesterol, cardiovascular, diabetes	t-10, c-12 CLA dietary supplementation inhibits atherosclerotic lesion development despite adverse cardiovascular and hepatic metabolic marker profiles.
pops_plus	35092334	20220129	9	heart, type 2 diabetes, coronary heart, coronary, met, pad, artery, diabetes, cardiovascular	SIRT1 rs7896005 polymorphism affects major vascular outcomes, not all-cause mortality, in Caucasians with type 2 diabetes: A 13-year observational study.
pops_plus	35092334	20220129	9	heart, type 2 diabetes, coronary heart, coronary, met, pad, artery, diabetes, cardiovascular	SIRT1rs7896005 polymorphism affects major vascular outcomes, not all-cause mortality, in Caucasians with Type 2 Diabetes: a 13-year observational study.
pops_plus	35085396	20220127	9	heart, type 2 diabetes, lipid, coronary, pnpla3, cardiovascular, artery, diabetes, coronary artery	Type 2 Diabetes Partitioned Polygenic Scores Associate With Disease Outcomes in 454,193 individuals Across 13 Cohorts.
pops_plus	35085396	20220127	9	heart, type 2 diabetes, lipid, coronary, pnpla3, cardiovascular, artery, diabetes, coronary artery	Type 2 Diabetes Partitioned Polygenic Scores Associate With Disease Outcomes in 454,193 Individuals Across 13 Cohorts.
pops_plus	30243490	20180924	9	lipid, atherosclerosis, coronary, hyperlipidemia, ldlr, lipids, cholesterol, artery, coronary artery	Spontaneous severe hypercholesterolemia and atherosclerosis lesions in rabbits with deficiency of low-density lipoprotein receptor (LDLR) on exon 7.
pops_plus	30229482	20180920	9	pcsk9, lipid, coronary, stroke, lipids, cholesterol, cardiovascular, triglycerides, diabetes	Lipids: a personal view of the past decade.
pops_plus	25655159	20150207	9	heart, coronary artery, coronary, hyperlipidemia, stroke, artery, diabetes, ahr, cardiovascular	Cardiovascular and cerebrovascular risk factors and events associated with second-generation antipsychotic compared to antidepressant use in a non-elderly adult sample: results from a claims-based inception cohort study.
pops_plus	24674750	20140329	9	lipid, atherosclerosis, coronary, lipids, cholesterol, sort1, artery, triglycerides, coronary artery	CELSR2-PSRC1-SORT1 gene expression and association with coronary artery disease and plasma lipid levels in an Asian Indian cohort.
pops_plus	15250255	20040715	9	heart, apob, lipid, coronary heart, triglyceride, coronary, fatty acid, cholesterol, apoa1	Effects of simvastain combined with omega-3 fatty acids on high sensitive C-reactive protein, lipidemia, and fibrinolysis in patients with mixed dyslipidemia.
pops_plus	23225056	20121211	9	heart, type 2 diabetes, coronary heart, peripheral vascular, triglyceride, coronary, gc, cholesterol, diabetes	[Association between mannose-binding lectin 2 gene and protein kinase C-beta 1 gene polymorphisms and type 2 diabetic macrovascular complications in northern Chinese Han population].
pops_plus	23226021	20121211	9	heart, pcsk9, apob, lipid, coronary heart, atherosclerosis, coronary, ldlr, cholesterol	Mipomersen and other therapies for the treatment of severe familial hypercholesterolemia.
pops_plus	19766896	20090922	9	heart, lipid, coronary heart, atherosclerosis, coronary, ldlr, cholesterol, artery, triglycerides	Rosuvastatin inhibits MMP-2 expression and limits the progression of atherosclerosis in LDLR-deficient mice.
pops_plus	34298011	20210723	9	heart, tp53, coronary artery, asxl1, tet2, coronary, jak2, artery, cardiovascular	Clonal hematopoiesis of indeterminate potential (CHIP): Linking somatic mutations, hematopoiesis, chronic inflammation and cardiovascular disease.
pops_plus	34298557	20210723	9	lipa, pcsk9, apob, abcg5, ldlr, apoe, cholesterol, ldlrap1, lipid	Next-generation sequencing to confirm clinical familial hypercholesterolemia.
pops_plus	23994331	20130903	9	heart, apob, coronary artery, atherosclerosis, coronary, lipid, lipids, artery, diabetes	Serum amyloid A is independently related to apolipoprotein A-I but not to HDL-cholesterol in patients with angina pectoris.
pops_plus	23998046	20130903	9	lipid, atherosclerosis, pon1, triglyceride, coronary, cholesterol, artery, triglycerides, coronary artery	The role of 'paraoxonase-1 activity' as an antioxidant in coronary artery diseases.
pops_plus	24005217	20130906	9	heart, coronary heart, atherosclerosis, coronary, lipids, cholesterol, sort1, cardiovascular, diabetes	From genotype to phenotype in human atherosclerosis--recent findings.
pops_plus	22494195	20120413	9	heart, lipid, coronary heart, lcat, coronary, hyperlipidemia, ldlr, cholesterol, cyp7a1	Hypolipidemic effects of a new piperine derivative GB-N from Piper longum in high-fat diet-fed rats.
pops_plus	16760224	20060609	9	heart, apoe, lipid, coronary heart, atherosclerosis, coronary, cholesterol, artery, cardiovascular	Apolipoprotein E polymorphisms predict low density lipoprotein cholesterol levels and carotid artery wall thickness but not incident coronary heart disease in 12,491 ARIC study participants.
pops_plus	3934306	19850901	9	lipid, atherosclerosis, lcat, coronary, stroke, fatty acid, cholesterol, artery, coronary artery	Familial apolipoprotein A-I and C-III deficiency, variant II.
pops_plus	29313544	20180110	9	pcsk9, lipid, cholesterol, lcat, ldlr, apoe, hmgcr, abca1, cyp7a1	Dietary supplementation of defatted kenaf (Hibiscus cannabinus L.) seed meal and its phenolics-saponins rich extract effectively attenuates diet-induced hypercholesterolemia in rats.
pops_plus	31085374	20190516	9	abcg1, apoe, abcg5, atherosclerosis, lipid, fatty acid, cholesterol, cyp7a1, cardiovascular	Polydatin attenuates atherosclerosis in apolipoprotein E-deficient mice: Role of reverse cholesterol transport.
pops_plus	31089735	20190516	9	heart, coronary heart, coronary, met, stroke, fatty acid, cholesterol, lipids, cardiovascular	Milk and Dairy Product Consumption and Cardiovascular Diseases: An Overview of Systematic Reviews and Meta-Analyses.
pops_plus	31100394	20190518	9	abcg1, lipid, abca1, triglyceride, hyperlipidemia, ldlr, pad, cholesterol, cyp7a1	The fucoidan A3 from the seaweed Ascophyllum nodosum enhances RCT-related genes expression in hyperlipidemic C57BL/6J mice.
pops_plus	16324926	20051206	9	heart, lipc, coronary heart, atherosclerosis, triglyceride, coronary, cholesterol, triglycerides, cardiovascular	Lipoprotein subclass and particle size differences in Afro-Caribbeans, African Americans, and white Americans: associations with hepatic lipase gene variation.
pops_plus	8782835	19960601	9	heart, apoe, coronary artery, coronary, cholesterol, artery, cardiovascular, triglycerides, diabetes	The relation of apolipoprotein E polymorphism to multiple cardiovascular risk in children: the Bogalusa Heart Study.
pops_plus	26947601	20160308	9	pcsk9, apob, lipid, coronary, ldlr, coronary artery, cholesterol, artery, cardiovascular	Characteristics and Vascular Complications of Familial Hypercholesterolemia in Korea.
pops_plus	26933753	20160303	9	lipid, triglyceride, coronary, angptl4, cholesterol, artery, cardiovascular, triglycerides, coronary artery	Inactivating Variants in ANGPTL4 and Risk of Coronary Artery Disease.
pops_plus	22994408	20120922	9	apoe, cetp, lipid, irs1, lpl, angptl3, lipids, sort1, cyp7a1	Transferability and fine mapping of genome-wide associated loci for lipids in African Americans.
pops_plus	32246442	20200405	9	coronary artery, atherosclerosis, ccs, coronary, lipid, lipids, artery, cardiovascular, diabetes	Coronary Artery Disease: From Mechanism to Clinical Practice.
pops_plus	15952120	20050614	9	type 2 diabetes, apob, lipid, triglyceride, lipids, cholesterol, cetp, apoa1, diabetes	[Association between insulin resistance and cholesteryl ester transfer protein gene polymorphism in type 2 diabetes mellitus].
pops_plus	19729614	20090905	9	lipc, cetp, mlxipl, apoa1, lpl, cholesterol, triglycerides, galnt2, cardiovascular	Ion mobility analysis of lipoprotein subfractions identifies three independent axes of cardiovascular risk.
pops_plus	16751940	20060606	9	apob, lipid, coronary, hyperlipidemia, fatty acid, cholesterol, artery, triglycerides, coronary artery	[Lipid profile and nutrition counseling effects in adolescents with family history of premature coronary artery disease].
pops_plus	34202724	20210702	9	pck1, lipid, triglyceride, prkaa2, ldlr, mttp, lipids, ppara, cardiovascular	Aerobic Exercise Training Prevents Insulin Resistance and Hepatic Lipid Accumulation in LDL Receptor Knockout Mice Chronically Fed a Low-Sodium Diet.
pops_plus	34235188	20210708	9	heart, coronary artery, coronary heart, triglyceride, coronary, cholesterol, artery, apoa1, diabetes	Correlation of Long Non-coding RNA LncRNA-FA2H-2 With Inflammatory Markers in the Peripheral Blood of Patients With Coronary Heart Disease.
pops_plus	34241534	20210709	9	heart, type 2 diabetes, apoe, coronary artery, atherosclerosis, coronary, artery, cardiovascular, diabetes	Multiethnic Genome-Wide Association Study of Subclinical Atherosclerosis in Individuals With Type 2 Diabetes.
pops_plus	28412693	20170417	9	lipid, atherosclerosis, triglyceride, coronary, lpl, angptl4, artery, triglycerides, coronary artery	Feeding <i>Angptl4</i><sup>-/-</sup> mice <i>trans</i> fat promotes foam cell formation in mesenteric lymph nodes without leading to ascites.
pops_plus	21657943	20110611	9	heart, pcsk9, apob, coronary heart, atherosclerosis, coronary, ldlr, cholesterol, cardiovascular	Familial hypercholesterolemia: epidemiology, Neolithic origins and modern geographic distribution.
pops_plus	24049113	20130920	9	heart, lipid, coronary heart, triglyceride, coronary, hyperlipidemia, cholesterol, cited2, cyp7a1	Mg supplementation attenuates ritonavir-induced hyperlipidemia, oxidative stress, and cardiac dysfunction in rats.
pops_plus	24069331	20130927	9	lipa, type 2 diabetes, coronary artery, atherosclerosis, coronary, cholesterol, artery, cardiovascular, diabetes	Single nucleotide polymorphisms within LIPA (Lysosomal Acid Lipase A) gene are associated with susceptibility to premature coronary artery disease. a replication in the genetic of atherosclerotic disease (GEA) Mexican study.
pops_plus	26320293	20150901	9	type 2 diabetes, apob, coronary artery, triglyceride, coronary, lipids, artery, apoa1, diabetes	[Comparative Randomized Study of the Effects of Long-Term Therapy With Rosuvastatin and Combination of Atorvastatin and Ezetimibe on Carbohydrate Metabolism and Adipokines Levels in Patients With Coronary Artery Disease and Diabetes Mellitus].
pops_plus	29703528	20180429	9	type 2 diabetes, lipid, cd36, pparg, fatty acid, cholesterol, diabetes, triglycerides, lipids	Replication of a Gene-Diet Interaction at CD36, NOS3 and PPARG in Response to Omega-3 Fatty Acid Supplements on Blood Lipids: A Double-Blind Randomized Controlled Trial.
pops_plus	23351581	20130129	9	type 2 diabetes, apob, lipid, triglyceride, coronary, coronary artery, cholesterol, artery, diabetes	Apolipoproteins A-I, B, and C-III in young adult Cherokee with metabolic syndrome with or without type 2 diabetes.
pops_plus	10449689	19990818	9	lipa, apoe, cetp, lipid, atherosclerosis, lcat, ldlr, lpl, apob	Splice-site mutations in atherosclerosis candidate genes: relating individual information to phenotype.
pops_plus	20217239	20100311	9	heart, apob, lipid, coronary heart, coronary, ldlr, lipids, cholesterol, triglycerides	Identification of a recurrent insertion mutation in the LDLR gene in a Pakistani family with autosomal dominant hypercholesterolemia.
pops_plus	27003162	20160323	9	irf2, irf1, stat3, hnf4a, rxra, pparg, hnf1a, lipids, fatty acid	Proteomic Profiling of Mouse Liver following Acute Toxoplasma gondii Infection.
pops_plus	27017606	20160328	9	abcg1, abcg5, cholesterol, triglyceride, ldlr, abca1, cyp7a1, apoa1, lipid	Celastrus Orbiculatus Thunb. Reduces Lipid Accumulation by Promoting Reverse Cholesterol Transport in Hyperlipidemic Mice.
pops_plus	26945091	20160306	9	type 2 diabetes, lipid, atherosclerosis, lpl, lipids, cholesterol, cardiovascular, triglycerides, diabetes	Disialylated apolipoprotein C-III proteoform is associated with improved lipids in prediabetes and type 2 diabetes.
pops_plus	20855565	20100922	9	heart, lipc, cetp, lipid, cubn, coronary heart, rxra, coronary, abca1	Common genetic variation in multiple metabolic pathways influences susceptibility to low HDL-cholesterol and coronary heart disease.
pops_plus	34327467	20210730	9	pcsk9, lipid, atherosclerosis, triglyceride, coronary, coronary artery, artery, cardiovascular, diabetes	C-reactive protein levels and plaque regression with evolocumab: Insights from GLAGOV.
pops_plus	34779419	20211115	9	cebpa, apob, lipid, coronary, ldlr, trib1, cholesterol, artery, coronary artery	TRIB1 regulates LDL metabolism through CEBPŒ±-mediated effects on the LDL receptor in hepatocytes.
pops_plus	34785535	20211117	9	lipid, hp, coronary, coronary artery, cholesterol, artery, cardiovascular, triglycerides, diabetes	Haptoglobin Phenotype Modifies the Effect of Fenofibrate on Risk of Coronary Event: ACCORD Lipid Trial.
pops_plus	34760938	20211111	9	abcg1, apoe, lipid, atherosclerosis, cd36, coronary, ppara, abca1, apoa1	Stage-Dependent Impact of RIPK1 Inhibition on Atherogenesis: Dual Effects on Inflammation and Foam Cell Dynamics.
pops_plus	34790723	20211118	9	abcg1, pcsk9, lipid, atherosclerosis, triglyceride, ldlr, apoe, abca1, cholesterol	Berberine attenuates atherosclerotic lesions and hepatic steatosis in ApoE<sup>-/-</sup> mice by down-regulating PCSK9 via ERK1/2 pathway.
pops_plus	14513073	20030927	9	heart, apob, lipid, apoa1, lipids, cholesterol, diabetes, triglycerides, cardiovascular	Consumption of a controlled low-fat diet containing olestra for 9 months improves health risk factors in conjunction with weight loss in obese men: the Ole' Study.
pops_plus	21641598	20110607	9	heart, apob, coronary heart, atherosclerosis, triglyceride, coronary, hyperlipidemia, cholesterol, cardiovascular	Serum apolipoprotein B-48 levels are correlated with carotid intima-media thickness in subjects with normal serum triglyceride levels.
pops_plus	30816800	20190301	9	coronary artery, triglyceride, coronary, angptl3, fatty acid, cholesterol, artery, triglycerides, cardiovascular	Metabolomic Signature of Angiopoietin-Like Protein 3 Deficiency in Fasting and Postprandial State.
pops_plus	30843124	20190308	9	heart, type 2 diabetes, coronary artery, hp, coronary, tf, artery, diabetes, cardiovascular	The additional impact of type 2 diabetes on baroreflex sensitivity of coronary artery disease patients might be undetectable in presence of deterioration of mechanical vascular properties.
pops_plus	7616113	19950401	9	heart, apoe, lipid, coronary heart, coronary, fatty acid, cholesterol, cardiovascular, lipids	Association between serum lipids and apolipoprotein E phenotype is influenced by diet in a population-based sample of free-living children and young adults: the Cardiovascular Risk in Young Finns Study.
pops_plus	22327732	20120214	9	type 2 diabetes, apoe, apob, lipid, apoa1, lipids, cholesterol, triglycerides, diabetes	Low serum apolipoprotein A1/B ratio is associated with proliferative diabetic retinopathy in type 2 diabetes.
pops_plus	22329439	20120215	9	heart, cetp, coronary artery, coronary heart, atherosclerosis, coronary, cholesterol, artery, cardiovascular	Dalcetrapib--restoring belief in modulating CETP as a beneficial mechanism in cardiovascular disease.
pops_plus	27187064	20160518	9	abcg1, cholesterol, ldlr, vegfa, nr5a2, hmgcr, abca1, apoa1, dhcr24	Corpus luteum as a novel target of weight changes that contribute to impaired female reproductive physiology and function.
pops_plus	2656141	19890501	9	apob, lipid, atherosclerosis, triglyceride, coronary, lipids, cholesterol, artery, coronary artery	Lipoproteins and apolipoproteins in young nonobese Arab women with NIDDM treated with insulin.
pops_plus	29626583	20180408	9	type 2 diabetes, apob, lipid, atherosclerosis, pon1, apoa1, cholesterol, triglycerides, diabetes	Abnormalities in the relationship of paraoxonase 1 with HDL and apolipoprotein A1 and their possible connection to HDL dysfunctionality in type 2 diabetes.
pops_plus	18480348	20080516	9	type 2 diabetes, cetp, coronary artery, atherosclerosis, coronary, cholesterol, artery, cardiovascular, diabetes	Targeting residual cardiovascular risk: raising high-density lipoprotein cholesterol levels.
pops_plus	32035487	20200210	9	type 2 diabetes, pcsk9, apob, lipid, lipids, cholesterol, cardiovascular, triglycerides, diabetes	Effect of alirocumab on individuals with type 2 diabetes, high triglycerides, and low high-density lipoprotein cholesterol.
pops_plus	32042730	20200212	9	heart, pcsk9, lipid, atherosclerosis, ldlr, abcg5, hmgcr, cholesterol, cardiovascular	The atheroprotective roles of heart-protecting musk pills against atherosclerosis development in apolipoprotein E-deficient mice.
pops_plus	32042868	20200212	9	heart, type 2 diabetes, atherosclerosis, triglyceride, akt1, stroke, cholesterol, diabetes, cardiovascular	Association of a genetic variant in AKT1 gene with features of the metabolic syndrome.
pops_plus	32044282	20200212	9	pcsk9, apob, lipid, coronary, ldlr, apoe, cholesterol, artery, coronary artery	Genetic analysis of familial hypercholesterolemia in Asian Indians: A¬†single-center study.
pops_plus	20413364	20100424	9	apob, lipid, atherosclerosis, coronary, cholesterol, artery, cardiovascular, triglycerides, coronary artery	Cardiovascular computed tomographic assessment of the effect of combination lipoprotein therapy on coronary arterial plaque: rationale and design of the AFRICA (Atorvastatin plus Fenofibric acid in the Reduction of Intermediate Coronary Atherosclerosis) study.
pops_plus	10669643	20000217	9	heart, apob, lipid, coronary heart, atherosclerosis, lcat, coronary, ldlr, cholesterol	LCAT modulates atherogenic plasma lipoproteins and the extent of atherosclerosis only in the presence of normal LDL receptors in transgenic rabbits.
pops_plus	20400780	20100420	9	heart, lipc, pcsk9, cetp, lipid, lpl, cholesterol, triglycerides, cardiovascular	Candidate gene association resource (CARe): design, methods, and proof of concept.
pops_plus	8457249	19930104	9	heart, cetp, coronary heart, atherosclerosis, triglyceride, coronary, lpl, cholesterol, triglycerides	Composition of human low density lipoprotein: effects of postprandial triglyceride-rich lipoproteins, lipoprotein lipase, hepatic lipase and cholesteryl ester transfer protein.
pops_plus	8111077	19930101	9	lipid, atherosclerosis, lcat, triglyceride, coronary, coronary artery, cholesterol, artery, diabetes	Lecithin:cholesterol acyltransferase activity and high-density lipoprotein subfraction composition in type 1 diabetic patients with improving metabolic control.
pops_plus	33994201	20210517	9	abcg1, apoe, tp53, lipid, atherosclerosis, cyp27a1, abca1, cholesterol, cardiovascular	TIGAR mitigates atherosclerosis by promoting cholesterol efflux from macrophages.
pops_plus	33969358	20210510	9	coronary artery, atherosclerosis, tcf7l2, coronary, lipid, lipids, artery, cardiovascular, diabetes	Wnt Signaling Cascades and Their Role in Coronary Artery Health and Disease.
pops_plus	21505149	20110421	9	apoe, apob, lipid, atherosclerosis, type ii diabetes, cholesterol, diabetes, apoa1, cardiovascular	Effects of macrophage-specific adiponectin expression on lipid metabolism in vivo.
pops_plus	21397230	20110315	9	heart, apoe, lipid, coronary heart, atherosclerosis, coronary, ldlr, cholesterol, cardiovascular	Effects of ezetimibe on atherosclerosis in preclinical models.
pops_plus	21398511	20110315	9	apoe, apob, lipid, atherosclerosis, coronary, ldlr, lipids, cetp, triglycerides	siRNA-induced liver ApoB knockdown lowers serum LDL-cholesterol in a mouse model with human-like serum lipids.
pops_plus	27386434	20160708	9	heart, cetp, lipid, triglyceride, stroke, lpl, triglycerides, fgb, cardiovascular	Zinc Finger 259 Gene Polymorphism rs964184 is Associated with Serum Triglyceride Levels and Metabolic Syndrome.
pops_plus	27363222	20160702	9	lipid, atherosclerosis, triglyceride, hyperlipidemia, lpl, lipids, cholesterol, triglycerides, cardiovascular	[Possibility of New Circulating Atherosclerosis-Related Lipid Markers Measurement in Medical and Complete Medical Checkups: Small Dense Low-Density Lipoprotein Cholesterol and Lipoprotein Lipase].
pops_plus	29453462	20180218	9	lipid, atherosclerosis, abca1, apoa1, ldlr, cholesterol, diabetes, triglycerides, cardiovascular	GQ-11: A new PPAR agonist improves obesity-induced metabolic alterations in LDLr<sup>-/-</sup> mice.
pops_plus	29449335	20180217	9	heart, coronary artery, atherosclerosis, coronary, ldlr, lipids, cholesterol, artery, triglycerides	Bempedoic Acid Lowers Low-Density Lipoprotein Cholesterol and Attenuates Atherosclerosis in Low-Density Lipoprotein Receptor-Deficient (<i>LDLR</i><sup>+/-</sup> and <i>LDLR</i><sup>-/-</sup>) Yucatan Miniature Pigs.
pops_plus	30921498	20190329	9	apob, lipid, atherosclerosis, abca1, ldlr, fatty acid, cholesterol, triglycerides, cardiovascular	Dietary Palmitoleic Acid Attenuates Atherosclerosis Progression and Hyperlipidemia in Low-Density Lipoprotein Receptor-Deficient Mice.
pops_plus	29233637	20171214	9	pcsk9, apob, lipid, abcg5, ldlr, angptl3, cholesterol, ldlrap1, cardiovascular	Compound heterozygous familial hypercholesterolemia in a Chinese boy with a de¬†novo and transmitted low-density lipoprotein receptor mutation.
pops_plus	29236376	20171214	9	heart, lipid, coronary heart, pon1, triglyceride, coronary, cholesterol, cardiovascular, diabetes	The relationship between serum ferritin levels and serum lipids and HDL function with respect to age and gender.
pops_plus	25176936	20140902	9	heart, apoe, mlxipl, hyperlipidemia, lpl, angptl3, trib1, cyp7a1, triglycerides	Common genetic variants contribute to primary hypertriglyceridemia without differences between familial combined hyperlipidemia and isolated hypertriglyceridemia.
pops_plus	16928680	20060825	9	abcg1, apob, abcg5, atherosclerosis, lcat, ldlr, abca1, cholesterol, lipid	ABCA1 overexpression in the liver of LDLr-KO mice leads to accumulation of pro-atherogenic lipoproteins and enhanced atherosclerosis.
pops_plus	31544207	20190924	9	heart, type 2 diabetes, coronary artery, coronary, ahr, stroke, artery, diabetes, cardiovascular	Pioglitazone Exposure Reduced the Risk of All-Cause Mortality in Insulin-Treated Patients with Type 2 Diabetes Mellitus.
pops_plus	19270352	20090310	9	heart, lipid, coronary heart, triglyceride, coronary, cholesterol, artery, apoa1, coronary artery	[Association of cathepsin L with coronary heart disease and its risk factors].
pops_plus	24715031	20140410	9	type 2 diabetes, coronary artery, atherosclerosis, lcat, coronary, cholesterol, artery, cardiovascular, diabetes	Premature and severe cardiovascular disease in a Mexican male with markedly low high-density-lipoprotein-cholesterol levels and a mutation in the lecithin:cholesterol acyltransferase gene: a family study.
pops_plus	28207527	20170217	9	heart, apob, lipid, coronary heart, coronary, lipids, cholesterol, triglycerides, coronary artery	Zhibitai and low-dose atorvastatin reduce blood lipids and inflammation in patients with coronary artery disease.
pops_plus	27736672	20161014	9	heart, apoe, coronary artery, coronary heart, atherosclerosis, triglyceride, coronary, cholesterol, artery	Genetic analysis of atherosclerosis identifies a major susceptibility locus in the major histocompatibility complex of mice.
pops_plus	16352778	20051215	9	heart, lipid, triglyceride, coronary, met, stroke, cholesterol, artery, coronary artery	Assessment of compliance with lipid guidelines in an academic medical center.
pops_plus	16343038	20051214	9	type 2 diabetes, apob, lipid, atherosclerosis, lipc, lpl, cholesterol, cetp, diabetes	Effect of gene polymorphisms on lipoprotein levels in patients with dyslipidemia of metabolic syndrome.
pops_plus	34055796	20210531	9	lipid, atherosclerosis, triglyceride, ldlr, fatty acid, cholesterol, artery, cyp7a1, cardiovascular	Whole-Body Prolyl Hydroxylase Domain (PHD) 3 Deficiency Increased Plasma Lipids and Hematocrit Without Impacting Plaque Size in Low-Density Lipoprotein Receptor Knockout Mice.
pops_plus	22553224	20120504	9	ppara, cholesterol, triglyceride, cd36, pparg, ppard, lpl, fatty acid, fabp1	Modulation of fatty acid transport and metabolism by maternal obesity in the human full-term placenta.
pops_plus	7936857	19941001	9	heart, apoe, lipid, coronary heart, atherosclerosis, coronary, lipids, cholesterol, triglycerides	Apolipoprotein E phenotypes and serum lipids in newborns and 3-year-old children: the Cardiovascular Risk in Young Finns Study.
pops_plus	7857379	19941001	9	cetp, lipid, atherosclerosis, triglyceride, coronary, bad, cholesterol, artery, coronary artery	Triglyceride-rich lipoproteins and atherosclerosis.
pops_plus	15306190	20040813	9	apob, lipid, triglyceride, coronary, coronary artery, cholesterol, artery, triglycerides, diabetes	APOA5 gene polymorphism modulates levels of triglyceride, HDL cholesterol and FERHDL but is not a risk factor for coronary artery disease.
pops_plus	17924833	20071011	9	lipid, coronary, apoa1, ldlr, cholesterol, artery, cardiovascular, triglycerides, coronary artery	Apolipoprotein polymorphisms and familial hypercholesterolemia.
pops_plus	14729863	20040120	9	heart, apob, lipid, coronary heart, atherosclerosis, triglyceride, coronary, lipids, cholesterol	APOA5 gene variants, lipoprotein particle distribution, and progression of coronary heart disease: results from the LOCAT study.
pops_plus	17425064	20070412	9	heart, type 2 diabetes, lipid, coronary heart, coronary, fabp4, fatty acid, diabetes, lipids	Identification of a functional polymorphism at the adipose fatty acid binding protein gene (FABP4) and demonstration of its association with cardiovascular disease: a path to follow.
pops_plus	17420118	20070411	9	heart, type 2 diabetes, coronary heart, triglyceride, coronary, met, cholesterol, cardiovascular, diabetes	Non-traditional markers of atherosclerosis potentiate the risk of coronary heart disease in patients with type 2 diabetes and metabolic syndrome.
pops_plus	24234650	20131116	9	heart, pcsk9, apob, coronary heart, atherosclerosis, coronary, ldlr, cholesterol, cardiovascular	Novel functional APOB mutations outside LDL-binding region causing familial hypercholesterolaemia.
pops_plus	16137712	20050903	9	heart, lipids, lipid, lcat, lpl, fatty acid, cholesterol, triglycerides, cardiovascular	Intraperitoneal leptin regulates lipid metabolism in ethanol supplemented Mus musculas heart.
pops_plus	18716026	20080822	9	heart, lipid, coronary heart, abca1, lcat, coronary, lipids, cholesterol, diabetes	HDL: bridging past and present with a look at the future.
pops_plus	26800308	20160123	9	heart, apoe, coronary artery, coronary heart, coronary, stroke, pad, artery, cardiovascular	The relation between apolipoprotein E (APOE) genotype and peripheral artery disease in patients at high risk for cardiovascular disease.
pops_plus	21353221	20110301	9	type 2 diabetes, coronary artery, irs1, coronary, cholesterol, artery, cardiovascular, triglycerides, diabetes	The type 2 diabetes and insulin-resistance locus near IRS1 is a determinant of HDL cholesterol and triglycerides levels among diabetic subjects.
pops_plus	27640339	20160920	9	lipid, pon1, atherosclerosis, por, coronary, cholesterol, artery, triglycerides, coronary artery	Paraoxonase 1 gene polymorphisms and enzyme activities in coronary artery disease and its relationship to serum lipids and glycemia.
pops_plus	30132511	20180823	9	lipid, abca1, triglyceride, hyperlipidemia, lipids, cholesterol, cyp7a1, triglycerides, cardiovascular	An impaired hepatic clock system effects lipid metabolism in rats with nephropathy.
pops_plus	30131040	20180823	9	heart, lipid, atherosclerosis, coronary, ldlr, cardiovascular, artery, diabetes, coronary artery	[Fibrogenesis Genes and Susceptibility to Coronary Atherosclerosis].
pops_plus	30134981	20180824	9	heart, apob, lipid, triglyceride, coronary, coronary artery, cholesterol, artery, diabetes	Atherogenic index of plasma (AIP): a novel predictive indicator for the coronary artery disease in postmenopausal women.
pops_plus	30137516	20180824	9	heart, pcsk9, lipid, atherosclerosis, coronary, cholesterol, artery, cardiovascular, coronary artery	Association between circulating proprotein convertase subtilisin/kexin type 9 levels and prognosis in patients with severe chronic kidney disease.
pops_plus	31480784	20190905	9	pcsk9, lipid, coronary, ldlr, cholesterol, artery, cardiovascular, triglycerides, coronary artery	Polymorphisms in PCSK9, LDLR, BCMO1, SLC12A3, and KCNJ1 are Associated with Serum Lipid Profile in Chinese Han Population.
pops_plus	32571615	20200624	9	heart, apob, lipid, atherosclerosis, coronary, coronary artery, cholesterol, artery, diabetes	Prevalence of poor lipid control in patients with premature coronary artery disease.
pops_plus	28766509	20170803	9	apob, lipid, cholesterol, lcat, pltp, lipids, abca1, cetp, cardiovascular	High-density lipoprotein metabolism and reverse cholesterol transport: strategies for raising HDL cholesterol.
pops_plus	22111029	20111124	9	heart, pcsk9, apob, coronary artery, bad, apoe, cholesterol, diabetes, cardiovascular	Premature coronary artery disease and familial hypercholesterolemia: need for early diagnosis and cascade screening in the Indian population.
pops_plus	28981240	20171006	9	heart, pcsk9, lipid, coronary heart, type ii diabetes, coronary, cholesterol, cardiovascular, diabetes	[Recent progresses in the treatment of dyslipidemia].
pops_plus	22116284	20111126	9	apob, coronary artery, triglyceride, coronary, nfkb1, vegfa, cholesterol, artery, fgb	A two-step genetic study on quantitative precursors of coronary artery disease in a homogeneous Indian population: case-control association discovery and validation by transmission-disequilibrium test.
pops_plus	33787603	20210331	9	type 2 diabetes, apob, lipid, coronary, coronary artery, lipids, artery, cardiovascular, diabetes	Association of dipeptidyl peptidase IV polymorphism, serum lipid profile, and coronary artery stenosis in patients with coronary artery disease and type 2 diabetes.
pops_plus	19551315	20090625	9	apob, coronary artery, atherosclerosis, triglyceride, coronary, lipids, cholesterol, artery, cardiovascular	The association between serum apolipoprotein A-I and apolipoprotein B and the severity of angiographical coronary artery disease.
pops_plus	26634513	20151205	9	type 2 diabetes, lipid, acacb, gck, pon1, tcf7l2, smad3, pnpla3, diabetes	Quantitative candidate gene association studies of metabolic traits in Han Chinese type 2 diabetes patients.
pops_plus	27088787	20160419	9	heart, type 2 diabetes, coronary heart, coronary, lipids, fatty acid, fads1, cardiovascular, diabetes	[Desaturases of fatty acids (FADS) and their physiological and clinical implication].
pops_plus	31359683	20190731	9	f2, lipid, ppara, pparg, stroke, vegfa, lipids, cholesterol, flt1	[Study on mechanism for treating ischemic stroke of Siegesbeckiae Herba based on network pharmacology].
pops_plus	31285632	20190710	9	atherosclerosis, peripheral vascular, coronary, ldlr, lpl, pad, cholesterol, artery, cardiovascular	Genome-wide association study of peripheral artery disease in the Million Veteran Program.
pops_plus	25837921	20150404	9	abcg1, apoe, apob, lipid, cyp27a1, ldlr, hmgcr, cholesterol, apoa1	The effects of Zanthoxylum bungeanum extract on lipid metabolism induced by¬†sterols.
pops_plus	28395986	20170412	9	pcsk9, lipid, triglyceride, coronary, lpl, cholesterol, artery, angptl4, coronary artery	A decade of progress on the genetic basis of coronary artery disease. Practical insights for the internist.
pops_plus	18671863	20080802	9	gpam, srebf1, lipid, scd, cd36, pparg, lpl, fatty acid, fads1	Gene networks driving bovine milk fat synthesis during the lactation cycle.
pops_plus	9831631	19981130	9	heart, apob, lipid, coronary heart, atherosclerosis, triglyceride, coronary, artery, coronary artery	Identification of two polymorphisms in the promoter of the microsomal triglyceride transfer protein (MTP) gene: lack of association with lipoprotein profiles.
pops_plus	11587157	20011006	9	type 2 diabetes, lipid, triglyceride, coronary, coronary artery, cholesterol, artery, apoa1, diabetes	Doxazosin reduces prevalence of small dense low density lipoprotein and remnant-like particle cholesterol levels in nondiabetic and diabetic hypertensive patients.
pops_plus	18048028	20071201	9	heart, type 2 diabetes, lipid, triglyceride, irs1, fatty acid, cholesterol, cardiovascular, diabetes	Effect of GCP-02, a PPARalpha/gamma dual activator, on glucose and lipid metabolism in insulin-resistant mice.
pops_plus	16397139	20060107	9	heart, apoe, lipid, coronary heart, atherosclerosis, coronary, cholesterol, artery, coronary artery	Hepatic lipase deficiency delays atherosclerosis, myocardial infarction, and cardiac dysfunction and extends lifespan in SR-BI/apolipoprotein E double knockout mice.
pops_plus	32510982	20200609	9	heart, pcsk9, apob, lipid, lipg, lpl, cholesterol, angptl4, triglycerides	Role of Rare and Low-Frequency Variants in Gene-Alcohol Interactions on Plasma Lipid Levels.
pops_plus	32479251	20200602	9	type 2 diabetes, coronary artery, atherosclerosis, triglyceride, coronary, cholesterol, artery, kit, diabetes	Positive Correlation between Circulating Fetuin-A and Severity of Coronary Artery Disease in Men.
pops_plus	25009679	20140711	9	heart, type 2 diabetes, coronary artery, coronary, met, stroke, artery, diabetes, cardiovascular	Gestational diabetes and risk of cardiovascular disease: a scoping review.
pops_plus	18987386	20081107	9	heart, lipid, coronary heart, coronary, trib1, cholesterol, triglycerides, galnt2, cardiovascular	Polymorphisms at newly identified lipid-associated loci are associated with blood lipids and cardiovascular disease in an Asian Malay population.
pops_plus	15694928	20050208	9	heart, cetp, lipid, coronary heart, atherosclerosis, lcat, coronary, pltp, cholesterol	Lipid transfer proteins (LTP) and atherosclerosis.
pops_plus	15690311	20050204	9	type 2 diabetes, apob, coronary artery, triglyceride, coronary, lipids, cholesterol, artery, diabetes	ApoC-III bound to apoB-containing lipoproteins increase with insulin resistance in Cherokee Indian youth.
pops_plus	34876165	20211208	9	pcsk9, apob, lipid, coronary, ldlr, coronary artery, cholesterol, artery, cardiovascular	Relations of physical signs to genotype, lipid and inflammatory markers, coronary stenosis or calcification, and outcomes in patients with heterozygous familial hypercholesterolemia.
pops_plus	34866324	20211206	9	abcg1, pcsk9, lipid, atherosclerosis, abca1, hyperlipidemia, ldlr, hmgcr, cholesterol	Effect of Emodin on Hyperlipidemia and Hepatic Lipid Metabolism in Zebrafish Larvae Fed a High-Cholesterol Diet.
pops_plus	34866324	20211206	9	abcg1, pcsk9, lipid, atherosclerosis, abca1, hyperlipidemia, ldlr, hmgcr, cholesterol	Effect of Emodin on Hyperlipidemia and Hepatic Lipid Metabolism in Zebrafish Larvae Fed a High-cholesterol Diet.
pops_plus	7500552	19950701	9	apob, lipid, atherosclerosis, coronary, coronary artery, cholesterol, artery, apoa1, diabetes	[Restenosis after percutaneous transluminal coronary angioplasty in the elderly--risk factor analysis].
pops_plus	34527220	20210916	9	type 2 diabetes, lipid, atherosclerosis, triglyceride, met, stroke, artery, cardiovascular, diabetes	Early detection of macrovascular complications in type 2 diabetes mellitus in Medan, North Sumatera, Indonesia: A cross-sectional study.
pops_plus	33691599	20210311	9	apoe, lipid, atherosclerosis, hyperlipidemia, fatty acid, cholesterol, cardiovascular, triglycerides, lipids	The gut microbiota during the progression of atherosclerosis in the perimenopausal period shows specific compositional changes and significant correlations with circulating lipid metabolites.
pops_plus	33693480	20210311	9	type 2 diabetes, apoe, cetp, atherosclerosis, triglyceride, fatty acid, cholesterol, cardiovascular, diabetes	Pharmacological treatment with FGF21 strongly improves plasma cholesterol metabolism to reduce atherosclerosis.
pops_plus	32859455	20200830	9	heart, coronary heart, atherosclerosis, fabp4, coronary, stroke, artery, diabetes, cardiovascular	Circulating fatty-acid binding-protein 4 levels predict CV events in patients after coronary interventions.
pops_plus	20196803	20100304	9	apob, lipid, triglyceride, srebf1, pparg, mttp, fatty acid, ppara, triglycerides	Expression of genes involved in lipogenesis is not increased in patients with HCV genotype 3 in human liver.
pops_plus	17284417	20070208	9	type 2 diabetes, lipid, atherosclerosis, coronary, coronary artery, fatty acid, artery, lpl, diabetes	[Research progress of lipoprotein lipase gene].
pops_plus	20941469	20101014	9	lipid, atherosclerosis, coronary, met, stroke, cholesterol, artery, cardiovascular, coronary artery	[High-dose statin therapy for high-risk patients].
pops_plus	20946261	20101016	9	heart, lipid, coronary heart, ccs, coronary, lipids, cholesterol, triglycerides, cardiovascular	Attainment of Canadian and European guidelines' lipid targets with atorvastatin plus ezetimibe vs. doubling the dose of atorvastatin.
pops_plus	10459790	19990825	9	heart, coronary heart, hp, atherosclerosis, coronary, cholesterol, cardiovascular, triglycerides, diabetes	Lack of association between Helicobacter pylori infection and extracardiac atherosclerosis in dyspeptic elderly subjects.
pops_plus	26892393	20160220	9	heart, pcsk9, coronary artery, coronary heart, atherosclerosis, coronary, cholesterol, artery, cardiovascular	Computed Tomography for Coronary Artery Calcification Scoring: Mammogram for the Heart.
pops_plus	20734577	20100826	9	heart, lipid, coronary heart, atherosclerosis, pon1, coronary, cholesterol, artery, coronary artery	Interaction of paraoxonase-192 polymorphism with low HDL-cholesterol in coronary artery disease risk.
pops_plus	16938803	20060830	9	heart, apoa1, coronary heart, atherosclerosis, coronary, hyperlipidemia, lpl, cholesterol, triglycerides	Unraveling the complex genetics of familial combined hyperlipidemia.
pops_plus	16487434	20060221	9	apob, lipid, atherosclerosis, coronary, apoa1, cholesterol, artery, triglycerides, coronary artery	Short-term dehydroepiandrosterone treatment increases platelet cGMP production in elderly male subjects.
pops_plus	22977169	20120915	9	lipid, lcat, ahr, ldlr, fatty acid, hmgcr, cholesterol, apoa1, lipids	TCDD-elicited effects on liver, serum, and adipose lipid composition in C57BL/6 mice.
pops_plus	18855536	20081016	9	heart, apoe, lipid, coronary heart, atherosclerosis, coronary, lipids, cholesterol, cardiovascular	Pharmacogenetics of apolipoprotein E gene during lipid-lowering therapy: lipid levels and prevention of coronary heart disease.
pops_plus	25329697	20141021	9	heart, type 2 diabetes, lipid, arnt, triglyceride, fatty acid, ppara, diabetes, cardiovascular	Cardiac-specific ablation of ARNT leads to lipotoxicity and cardiomyopathy.
pops_plus	15262189	20040721	9	type 2 diabetes, lipid, atherosclerosis, triglyceride, lpl, cholesterol, cardiovascular, triglycerides, diabetes	Atorvastatin improves diabetic dyslipidemia and increases lipoprotein lipase activity in vivo.
pops_plus	32425817	20200520	9	type 2 diabetes, coronary artery, pitpnm2, coronary, srebf1, cholesterol, artery, triglycerides, diabetes	Integrated Analysis of Summary Statistics to Identify Pleiotropic Genes and Pathways for the Comorbidity of Schizophrenia and Cardiometabolic Disease.
pops_plus	21741043	20110712	9	heart, lipc, pcsk9, abcg5, abca1, pparg, lrp1, cholesterol, cardiovascular	Genetic variability within the cholesterol lowering pathway and the effectiveness of statins in reducing the risk of MI.
pops_plus	15925013	20050601	9	type 2 diabetes, apob, lipid, fatty acid, cholesterol, cetp, cardiovascular, triglycerides, diabetes	Regulation of plasma triglycerides in insulin resistance and diabetes.
pops_plus	25050552	20140723	9	cetp, abcg5, triglyceride, apoa1, ldlr, lpl, cholesterol, triglycerides, lipid	A systematic evaluation of short tandem repeats in lipid candidate genes: riding on the SNP-wave.
pops_plus	25587205	20150115	9	lipc, apob, lipid, ldlr, mttp, lipids, cholesterol, triglycerides, lpl	Association of polymorphisms of genes involved in lipid metabolism with blood pressure and lipid values in mexican hypertensive individuals.
pops_plus	31703101	20191109	9	type 2 diabetes, pcsk9, apob, gck, hnf4a, ldlr, hnf1a, cholesterol, diabetes	Metformin strongly affects transcriptome of peripheral blood cells in healthy individuals.
pops_plus	33471027	20210120	9	heart, lipid, coronary heart, coronary, ahr, cholesterol, cardiovascular, triglycerides, diabetes	Association of Lipid, Inflammatory, and Metabolic Biomarkers With Age at Onset for Incident Coronary Heart Disease in Women.
pops_plus	24502618	20140208	9	type 2 diabetes, lipid, coronary, coronary artery, cholesterol, artery, kit, triglycerides, diabetes	Plasma level of cyclophilin A is increased in patients with type 2 diabetes mellitus and suggests presence of vascular disease.
pops_plus	32360841	20200504	9	type 2 diabetes, coronary artery, triglyceride, coronary, lpl, cholesterol, artery, cardiovascular, diabetes	Genetics of type 2 diabetes and coronary artery disease and their associations with twelve cardiometabolic traits in the United Arab Emirates population.
pops_plus	23405096	20130214	9	fn1, gab2, npc1, apoh, pparg, ppard, lipids, cholesterol, cardiovascular	Mixed modeling of meta-analysis P-values (MixMAP) suggests multiple novel gene loci for low density lipoprotein cholesterol.
pops_plus	21187013	20101229	9	irf1, stat3, mlxipl, creb1, tcf7l2, ebf1, tf, diabetes, cardiovascular	Bio-informatics analysis of a gene co-expression module in adipose tissue containing the diet-responsive gene Nnat.
pops_plus	21169907	20101221	9	heart, coronary artery, atherosclerosis, ccs, coronary, stroke, cholesterol, artery, cardiovascular	Elevated resistin opposed to adiponectin or angiogenin plasma levels as a strong, independent predictive factor for the occurrence of major adverse cardiac and cerebrovascular events in patients with stable multivessel coronary artery disease over 1-year follow-up.
pops_plus	23415532	20130219	9	pck1, pnpla2, scd, pde3a, prkaa2, pde3b, pparg, srebf1, fatty acid	Change in subcutaneous adipose tissue metabolism and gene network expression during the transition period in dairy cows, including differences due to sire genetic merit.
pops_plus	9012638	19970101	9	heart, cetp, coronary heart, lcat, triglyceride, coronary, lpl, cholesterol, triglycerides	Determinants of plasma HDL-cholesterol in hypertriglyceridemic patients. Role of cholesterol-ester transfer protein and lecithin cholesteryl acyl transferase.
pops_plus	9012639	19970101	9	heart, apob, lipid, coronary heart, atherosclerosis, triglyceride, coronary, fatty acid, diabetes	Differences in insulin suppression of free fatty acid levels by gender and glucose tolerance status. Relation to plasma triglyceride and apolipoprotein B concentrations. Insulin Resistance Atherosclerosis Study (IRAS) Investigators.
pops_plus	19648057	20090804	9	heart, apob, coronary heart, coronary, stroke, cholesterol, diabetes, apoa1, cardiovascular	A comparison of risk factors for coronary heart disease and ischaemic stroke: the Dubbo study of Australian elderly.
pops_plus	15099276	20040422	9	heart, apob, lipid, coronary heart, triglyceride, coronary, cholesterol, cardiovascular, diabetes	Effects of lipids and lipid-lowering therapy on hemostatic factors in patients with myocardial infarction.
pops_plus	24811298	20140510	9	heart, apoe, coronary heart, apom, apoh, coronary, lipids, cholesterol, triglycerides	The composition and metabolism of large and small LDL.
pops_plus	24812430	20140510	9	type 2 diabetes, lipid, irs1, tcf7l2, elovl6, pparg, vegfa, fads1, diabetes	Altered DNA methylation and differential expression of genes influencing metabolism and inflammation in adipose tissue from subjects with type 2 diabetes.
pops_plus	34100221	20210608	9	pcsk9, lipid, coronary, ldlr, coronary artery, cholesterol, artery, cardiovascular, diabetes	Switching from lipoprotein apheresis to evolocumab in FH siblings on hemodialysis: case reports and discussion.
pops_plus	34084908	20210604	9	heart, lipid, coronary heart, abca1, coronary, cholesterol, artery, cardiovascular, coronary artery	Regulation of microRNA-33, SREBP and ABCA1 genes in a mouse model of high cholesterol.
pops_plus	22012398	20111021	9	lipid, atherosclerosis, triglyceride, abca1, srebf1, fatty acid, cholesterol, triglycerides, cardiovascular	Inhibition of miR-33a/b in non-human primates raises plasma HDL and lowers VLDL triglycerides.
pops_plus	22018640	20111025	9	heart, lipid, coronary heart, triglyceride, coronary, lpl, fatty acid, cholesterol, cardiovascular	Eicosapentaenoic acid administration attenuates the pro-inflammatory properties of VLDL by decreasing its susceptibility to lipoprotein lipase in macrophages.
pops_plus	22858201	20120804	9	abcg5, akt1, abca1, irs1, cd36, pten, mttp, cholesterol, lipid	Cinnamon polyphenols regulate multiple metabolic pathways involved in insulin signaling and intestinal lipoprotein metabolism of small intestinal enterocytes.
pops_plus	27932355	20161210	9	heart, pcsk9, apob, lipid, coronary, ldlr, cholesterol, artery, coronary artery	Familial Hypercholesterolemia Phenotype in Chinese Patients Undergoing Coronary Angiography.
pops_plus	27955667	20161214	9	heart, lipid, coronary heart, rxra, coronary, akt1, fabp4, lpl, artery	The effect of Chinese herbs and its effective components on coronary heart disease through PPARs-PGC1Œ± pathway.
pops_plus	18079094	20071215	9	heart, lipid, coronary heart, coronary, apoa1, pad, cholesterol, triglycerides, diabetes	[Risk status of patients with peripheral arterial disease (PAD)].
pops_plus	28686204	20170708	9	sp1, cholesterol, triglyceride, pparg, insr, fabp1, diabetes, triglycerides, cardiovascular	Metabolic and Blood Pressure Effects of Walnut Supplementation in a Mouse Model of the Metabolic Syndrome.
pops_plus	28682808	20170707	9	lipid, sp1, lcat, coronary, bad, coronary artery, cholesterol, artery, cardiovascular	Protein changes in non-LDL-lipoproteins in familial hypercholesterolemia: implications in cardiovascular disease manifestation and outcome.
pops_plus	24552169	20140221	9	type 2 diabetes, apob, coronary artery, atherosclerosis, coronary, cholesterol, artery, cardiovascular, diabetes	IL-24 gene polymorphisms are associated with cardiometabolic parameters and cardiovascular risk factors but not with premature coronary artery disease: the genetics of atherosclerotic disease Mexican study.
pops_plus	24558110	20140222	9	heart, lipid, coronary heart, atherosclerosis, pcsk7, coronary, cholesterol, cardiovascular, diabetes	Small dense low-density lipoprotein-cholesterol concentrations predict risk for coronary heart disease: the Atherosclerosis Risk In Communities (ARIC) study.
pops_plus	27132570	20160503	9	heart, coronary artery, coronary, met, stroke, artery, diabetes, triglycerides, cardiovascular	Metabolic Syndrome and Sexual Function in Postmenopausal Women.
pops_plus	22224712	20120110	9	type 2 diabetes, apob, lipid, atherosclerosis, triglyceride, coronary, coronary artery, artery, diabetes	Exploring the value of apoB48 as a marker for atherosclerosis in clinical practice.
pops_plus	22225954	20120110	9	heart, lipid, kit, hyperlipidemia, ldlr, fatty acid, cholesterol, triglycerides, lipids	Oxysterol sulfation by cytosolic sulfotransferase suppresses liver X receptor/sterol regulatory element binding protein-1c signaling pathway and reduces serum and hepatic lipids in mouse models of nonalcoholic fatty liver disease.
pops_plus	22228254	20120110	9	heart, pcsk9, apob, lipid, coronary heart, atherosclerosis, coronary, ldlr, cholesterol	Screening for familial hypercholesterolaemia.
pops_plus	22229114	20120110	9	heart, lipc, cetp, lipid, coronary heart, lcat, coronary, lpl, cholesterol	Common Variants in 6 Lipid-Related Genes Discovered by High-Resolution DNA Melting Analysis and Their Association with Plasma Lipids.
pops_plus	35209731	20220225	9	heart, pcsk9, coronary artery, coronary heart, coronary, stroke, cholesterol, artery, cardiovascular	Effect of Evolocumab in Patients With Prior Percutaneous Coronary Intervention.
pops_plus	35189703	20220222	9	pcsk9, lipid, atherosclerosis, ldlr, stroke, apoe, lipids, cholesterol, cardiovascular	Ablation of Plasma Prekallikrein Decreases LDL Cholesterol by Stabilizing LDL Receptor and Protects against Atherosclerosis.
pops_plus	35183903	20220220	9	heart, apob, coronary heart, abca1, triglyceride, coronary, lipids, cholesterol, triglycerides	The role of HDL- and non-HDL-related parameters in cell-cholesterol efflux capacity.
pops_plus	27350042	20160629	9	abcg1, lipid, atherosclerosis, triglyceride, srebf1, lipids, cholesterol, triglycerides, dhcr24	Blood lipids influence DNA methylation in circulating cells.
pops_plus	11093290	20001128	9	apoe, apob, lcat, triglyceride, lpl, lipids, cholesterol, triglycerides, fatty acid	Treatment of hypertriglyceridemia by two diets rich either in unsaturated fatty acids or in carbohydrates: effects on lipoprotein subclasses, lipolytic enzymes, lipid transfer proteins, insulin and leptin.
pops_plus	34244239	20210710	9	coronary artery, atherosclerosis, fabp4, coronary, stroke, fatty acid, artery, cardiovascular, diabetes	The Low-Expression Variant of <i>FABP4</i> Is Associated With Cardiovascular Disease in Type 1 Diabetes.
pops_plus	18774574	20080909	9	heart, coronary heart, atherosclerosis, coronary, gc, cholesterol, artery, apoa1, cardiovascular	Polymorphism in the IL6 promoter region is associated with the risk factors and markers of subclinical atherosclerosis in men: The Cardiovascular Risk in Young Finns Study.
pops_plus	27299563	20160615	9	heart, coronary artery, coronary, hyperlipidemia, met, stroke, artery, diabetes, cardiovascular	Quality Improvement for Cardiovascular Disease Care in Low- and Middle-Income Countries: A Systematic Review.
pops_plus	30927763	20190401	9	apob, lipid, atherosclerosis, triglyceride, stroke, cholesterol, artery, apoa1, diabetes	The association of serum lipid level with ischemic stroke in the elderly of Xinjiang.
pops_plus	10889803	20000713	9	heart, apoe, apob, lipid, coronary heart, coronary, lpl, cetp, apoa1	Genetic determinants of plasma lipid response to dietary intervention: the role of the APOA1/C3/A4 gene cluster and the APOE gene.
pops_plus	15044381	20040327	9	lipc, apoe, apob, lipid, cholesterol, ldlr, lpl, abca1, cetp	Haplotypes and SNPs in 13 lipid-relevant genes explain most of the genetic variance in high-density lipoprotein and low-density lipoprotein cholesterol.
pops_plus	31988148	20200129	9	abcg1, lipid, abca1, cd36, coronary, cholesterol, artery, apoa1, coronary artery	Role of pyruvate kinase M2 in oxidized LDL-induced macrophage foam cell formation and inflammation.
pops_plus	31991203	20200129	9	apoe, apob, lipid, pon1, triglyceride, pltp, fatty acid, cholesterol, apoa1	Anti-depressive effects of Kai-Xin-San on lipid metabolism in depressed patients and CUMS rats using metabolomic analysis.
pops_plus	21120692	20101202	9	heart, lipid, coronary heart, triglyceride, coronary, hyperlipidemia, lpl, cholesterol, triglycerides	Hypertriglyceridemia and delayed clearance of fat load in transgenic rabbits expressing human apolipoprotein CIII.
pops_plus	28592245	20170609	9	brca1, rps6ka1, igf1r, lipid, creb1, gsk3b, cux1, insr, ep300	In silico identification of potential key regulatory factors in smoking-induced lung cancer.
pops_plus	12398019	20021026	9	heart, apoe, apob, lipid, coronary heart, coronary, stroke, cholesterol, triglycerides	Angiotensin-converting enzyme gene polymorphism, lipids, and apolipoproteins in menopausal women on hormone replacement therapy.
pops_plus	1289018	19921201	9	heart, apob, coronary heart, coronary, apoa1, lipids, cholesterol, triglycerides, diabetes	A cross-sectional evaluation of cardiovascular risk factors in coronary heart disease associated with type 1 (insulin-dependent) diabetes mellitus.
pops_plus	29980053	20180707	9	pcsk9, lipid, coronary, coronary artery, lipids, cholesterol, artery, cardiovascular, diabetes	Extreme-risk category: High prevalence among stable coronary patients and an emerging widening treatment gap in achieving LDL-cholesterol less than 55‚ÄØmg/dL.
pops_plus	22384308	20120303	9	heart, type 2 diabetes, sod1, coronary heart, atherosclerosis, coronary, lepr, diabetes, cardiovascular	Exercise Training Prevents Coronary Endothelial Dysfunction in Type 2 Diabetic Mice.
pops_plus	34673572	20211021	9	tgfb1, pcsk9, abcg1, atherosclerosis, triglyceride, stroke, cholesterol, diabetes, cardiovascular	Differential importance of endothelial and hematopoietic cell GLP-1Rs for cardiometabolic versus hepatic actions of semaglutide.
pops_plus	34680102	20211023	9	cyp7a1, lipid, abcg5, triglyceride, hyperlipidemia, lipids, cholesterol, cardiovascular, fatty acid	Rosmarinic Acid Exhibits a Lipid-Lowering Effect by Modulating the Expression of Reverse Cholesterol Transporters and Lipid Metabolism in High-Fat Diet-Fed Mice.
pops_plus	26025389	20150531	9	heart, type 2 diabetes, apob, coronary heart, coronary, cholesterol, cardiovascular, triglycerides, diabetes	Association of HDL cholesterol efflux capacity with incident coronary heart disease events: a prospective case-control study.
pops_plus	27829582	20161111	9	heart, apob, lipid, coronary heart, coronary, fatty acid, cholesterol, cardiovascular, diabetes	Postprandial Hyperlipidemia and Remnant Lipoproteins.
pops_plus	27273599	20160609	9	apoe, apob, atherosclerosis, abca1, ldlr, fatty acid, cholesterol, lipids, cardiovascular	Long-chain monounsaturated fatty acid-rich fish oil attenuates the development of atherosclerosis in mouse models.
pops_plus	26268997	20150814	9	type 2 diabetes, cetp, lipid, coronary, coronary artery, lipids, cholesterol, artery, diabetes	Alterations in lipid transfers to HDL associated with the presence of coronary artery disease in patients with type 2 diabetes mellitus.
pops_plus	24879842	20140601	9	apob, lipid, triglyceride, coronary, coronary artery, lipids, cholesterol, artery, diabetes	Different lipid variables predict incident coronary artery disease in patients with type 1 diabetes with or without diabetic nephropathy: the FinnDiane study.
pops_plus	21257006	20110125	9	type 2 diabetes, apob, coronary artery, atherosclerosis, coronary, cholesterol, artery, cardiovascular, diabetes	Usefulness of insulin resistance estimation and the metabolic syndrome in predicting coronary atherosclerosis in type 2 diabetes mellitus.
pops_plus	21258337	20110125	9	triglyceride, cd36, hyperlipidemia, lpl, fatty acid, cholesterol, cardiovascular, triglycerides, lipids	Brown adipose tissue activity controls triglyceride clearance.
pops_plus	31006138	20190422	9	type 2 diabetes, pcsk9, lipid, fatty acid, cholesterol, cardiovascular, diabetes, triglycerides, lipids	An updated review of lipid-modifying therapy.
pops_plus	25082954	20140802	9	heart, coronary artery, ccs, coronary, lipids, cholesterol, artery, triglycerides, cardiovascular	A randomised trial comparing weight loss with aerobic exercise in overweight individuals with coronary artery disease: The CUT-IT trial.
pops_plus	30428630	20181116	9	cebpa, lipid, ppara, hyperlipidemia, pparg, fabp4, fatty acid, cholesterol, triglycerides	Polygonatum odoratum Polysaccharides Modulate Gut Microbiota and Mitigate Experimentally Induced Obesity in Rats.
pops_plus	30415195	20181112	9	pcsk9, apob, lipid, atherosclerosis, met, ldlr, cholesterol, ldlrap1, cardiovascular	Spectrum of mutations of familial hypercholesterolemia in the 22 Arab countries.
pops_plus	19103817	20081224	9	type 2 diabetes, cetp, coronary artery, atherosclerosis, coronary, cholesterol, artery, cardiovascular, diabetes	Targeting residual cardiovascular risk: raising high-density lipoprotein cholesterol levels.
pops_plus	19956623	20091204	9	heart, apoe, coronary artery, coronary heart, atherosclerosis, coronary, lipids, cholesterol, artery	Loss of PDZK1 causes coronary artery occlusion and myocardial infarction in Paigen diet-fed apolipoprotein E deficient mice.
pops_plus	19948975	20091202	9	coronary artery, atherosclerosis, pon1, coronary, insr, vegfa, ppara, artery, diabetes	Integrative predictive model of coronary artery calcification in atherosclerosis.
pops_plus	22450777	20120328	9	apob, lipid, coronary, hyperlipidemia, pad, cholesterol, artery, triglycerides, coronary artery	Preventive effect of embelin from embelia ribes on lipid metabolism and oxidative stress in high-fat diet-induced obesity in rats.
pops_plus	22442750	20120324	9	heart, type 2 diabetes, apoe, coronary heart, triglyceride, coronary, cholesterol, cardiovascular, diabetes	ApoE isoforms, treatment of diabetes and the risk of coronary heart disease.
pops_plus	18611440	20080710	9	apoe, lipid, atherosclerosis, coronary, lipids, cholesterol, artery, triglycerides, coronary artery	Serine palmitoyltransferase inhibitor myriocin induces the regression of atherosclerotic plaques in hyperlipidemic ApoE-deficient mice.
pops_plus	34593221	20211001	9	gpam, srebf1, lipid, scd, cd36, pparg, lpl, fatty acid, nr1h3	Liver X receptor Œ± promotes milk fat synthesis in buffalo mammary epithelial cells by regulating the expression of FASN.
pops_plus	7981178	19941201	9	apoe, apob, lipid, atherosclerosis, coronary, cholesterol, artery, triglycerides, coronary artery	Effects of lovastatin on ApoA- and ApoB-containing lipoproteins. Families in a subpopulation of patients participating in the Monitored Atherosclerosis Regression Study (MARS).
pops_plus	16039278	20050726	9	heart, type 2 diabetes, apoe, lipid, coronary heart, atherosclerosis, coronary, cholesterol, diabetes	Increased hypercholesterolemia and atherosclerosis in mice lacking both ApoE and leptin receptor.
pops_plus	16335008	20051213	9	heart, apoe, apob, lipid, coronary heart, triglyceride, coronary, lipids, cholesterol	[The relationship between ApoE gene polymorphism and lipid parameters].
pops_plus	34279740	20210719	9	heart, tp53, coronary artery, asxl1, tet2, coronary, jak2, artery, cardiovascular	Clonal hematopoiesis of indeterminate potential (CHIP) and cardiovascular diseases-an updated systematic review.
pops_plus	32936272	20200916	9	ahr, coronary artery, atherosclerosis, coronary, hyperlipidemia, cholesterol, artery, cardiovascular, diabetes	Association of Normal Systolic Blood Pressure Level With Cardiovascular Disease in the Absence of Risk Factors.
pops_plus	32929345	20200915	9	heart, apoe, lipid, abcg1, coronary heart, atherosclerosis, coronary, cholesterol, abca1	Bifunctional supramolecular nanofiber inhibits atherosclerosis by enhancing plaque stability and anti-inflammation in apoE<sup>-/-</sup> mice.
pops_plus	21127884	20101204	9	lipid, triglyceride, coronary, hyperlipidemia, lpl, cholesterol, artery, triglycerides, coronary artery	The S447X variant of lipoprotein lipase gene is inversely associated with severity of coronary artery disease.
pops_plus	15298047	20040810	9	apob, lipid, atherosclerosis, pon1, coronary, cholesterol, artery, triglycerides, coronary artery	Association between paraoxonase-1 activity and lipid peroxidation indicator levels in people living in the Antalya region with angiographically documented coronary artery disease.
pops_plus	23202632	20121204	9	heart, coronary artery, coronary heart, coronary, rbp4, lipids, artery, cardiovascular, fatty acid	[Plasma level of RBP4 in patients with coronary heart disease and the effect of hyperinsulinemia].
pops_plus	29739781	20180510	9	heart, type 2 diabetes, coronary heart, coronary, met, stroke, cholesterol, diabetes, cardiovascular	Multiple risk factor control, mortality and cardiovascular events in type 2 diabetes and chronic kidney disease: a population-based cohort study.
pops_plus	19487539	20090603	9	lipid, mlxipl, triglyceride, angptl3, trib1, cholesterol, sort1, triglycerides, galnt2	Large scale replication analysis of loci associated with lipid concentrations in a Japanese population.
pops_plus	12747600	20030516	9	lipid, triglyceride, coronary, lpl, lipids, cholesterol, artery, triglycerides, coronary artery	Lipoprotein lipase gene polymorphisms in Croatian patients with coronary artery disease.
pops_plus	28046027	20170104	9	heart, lipid, coronary heart, triglyceride, coronary, lpl, cholesterol, cardiovascular, diabetes	Genome-Wide Association Study Reveals Four Loci for Lipid Ratios in the Korean Population and the Constitutional Subgroup.
pops_plus	21966275	20111004	9	lipa, abcg5, coronary, lipid, coronary artery, trib1, artery, col4a2, cardiovascular	Large-scale gene-centric analysis identifies novel variants for coronary artery disease.
pops_plus	20383550	20100413	9	apob, lipid, atherosclerosis, apoa1, met, lipids, cholesterol, triglycerides, cardiovascular	A systematic review of the effect of TNF-alpha antagonists on lipid profiles in patients with rheumatoid arthritis.
pops_plus	22264909	20120124	9	lipid, apoa1, hyperlipidemia, fatty acid, cholesterol, artery, cardiovascular, triglycerides, lipids	Reduced cardiovascular risk after bariatric surgery is linked to plasma ceramides, apolipoprotein-B100, and ApoB100/A1 ratio.
pops_plus	22266797	20120124	9	type 2 diabetes, lipid, atherosclerosis, elovl6, fatty acid, cardiovascular, diabetes, triglycerides, lipids	Novel qualitative aspects of tissue fatty acids related to metabolic regulation: lessons from Elovl6 knockout.
pops_plus	9569171	19980506	9	heart, type 2 diabetes, apob, coronary heart, triglyceride, coronary, cholesterol, cardiovascular, diabetes	The insulin resistance-dyslipidemic syndrome of visceral obesity: effect on patients' risk.
pops_plus	10407505	19990717	9	lipid, atherosclerosis, coronary, lpl, lipids, cholesterol, artery, cardiovascular, coronary artery	Lipoprotein lipase gene mutations, plasma lipid levels, progression/regression of coronary atherosclerosis, response to therapy, and future clinical events. Lipoproteins and Coronary Atherosclerosis Study.
pops_plus	7652481	19950101	9	heart, apob, coronary artery, atherosclerosis, coronary, hyperlipidemia, cholesterol, artery, cardiovascular	Rare and common mutations in hyperlipidemia and atherosclerosis. With special reference to familial defective apolipoprotein B-100.
pops_plus	11345167	20010510	9	heart, type 2 diabetes, apob, coronary heart, hp, atherosclerosis, coronary, artery, diabetes	Carotid intima-media thickness in patients with Type 2 diabetes and hypercholesterolemia.
pops_plus	33619380	20210223	9	adcy5, csk, irs1, aldh2, pparg, vegfa, fatty acid, pik3r1, fam13a	Genome-wide discovery of genetic loci that uncouple excess adiposity from its comorbidities.
pops_plus	19939652	20091127	9	heart, apob, lipid, coronary heart, coronary, lipids, cholesterol, triglycerides, cardiovascular	Prevalence of blood lipid disturbances in Swedish and foreign-born 60-year-old men and women in Stockholm, Sweden.
pops_plus	17689519	20070811	9	apoe, lipid, type ii diabetes, coronary, coronary artery, lipids, cholesterol, artery, diabetes	The presence of apolipoprotein epsilon4 and epsilon2 alleles augments the risk of coronary artery disease in type 2 diabetic patients.
pops_plus	19519458	20090613	9	heart, apob, lipid, coronary heart, coronary, cholesterol, cetp, triglycerides, cardiovascular	Cholesteryl ester transfer protein (CETP) inhibitors.
pops_plus	23887638	20130727	9	heart, type 2 diabetes, lipid, coronary heart, atherosclerosis, coronary, artery, kit, diabetes	Serum fibroblast growth factor-21 levels are associated with carotid atherosclerosis independent of established cardiovascular risk factors.
pops_plus	28294846	20170316	9	type 2 diabetes, apob, coronary artery, triglyceride, coronary, lipids, artery, apoa1, diabetes	[Comparative Randomized Study of the Effects of Long-Term Therapy With Rosuvastatin and With Combination of Atorvastatin and Ezetimibe on Carbohydrate Metabolism and Adipokynes Levels in Patients With Coronary Artery Disease and Diabetes Mellitus].
pops_plus	28286704	20170314	9	triglyceride, hyperlipidemia, ldlr, angptl4, angptl3, lipids, cholesterol, dyslipidemias, cardiovascular	Genetics of Lipid and Lipoprotein Disorders and Traits.
pops_plus	28958330	20170930	9	lipa, pcsk9, apob, lipid, coronary, ldlr, apoe, cholesterol, ldlrap1	Genetically Confirmed Familial Hypercholesterolemia in Patients With Acute Coronary Syndrome.
pops_plus	34402268	20210817	9	f2, lipid, atherosclerosis, triglyceride, hyperlipidemia, akt1, cholesterol, rela, bcl2	[Efficacy and mechanism of new resource medicinal materia Moringa oleifera leaves against hyperlipidemia].
pops_plus	34373341	20210810	9	type 2 diabetes, apob, coronary artery, coronary, pparg, cholesterol, artery, triglycerides, diabetes	rs10865710 polymorphism in <i>PPARG</i> promoter is associated with the severity of type 2 diabetes mellitus and coronary artery disease in a Chinese population.
pops_plus	18156097	20071225	9	heart, apoe, lipid, atherosclerosis, hyperlipidemia, fatty acid, cholesterol, cardiovascular, diabetes	Gender, a significant factor in the cross talk between genes, environment, and health.
pops_plus	27180962	20160517	9	heart, cetp, lipid, coronary heart, ldlr, coronary, stroke, hmgcr, cardiovascular	Association between selected gene polymorphisms and statin metabolism, risk of ischemic stroke and cardiovascular disorders.
pops_plus	27165836	20160512	9	apob, lipid, triglyceride, hyperlipidemia, lipids, cholesterol, cardiovascular, triglycerides, fatty acid	Disorders of lipid metabolism in nephrotic syndrome: mechanisms and consequences.
pops_plus	28259941	20170306	9	heart, apob, lipid, coronary heart, triglyceride, coronary, cholesterol, cetp, diabetes	Consumption of policosanol enhances HDL functionality via CETP inhibition and reduces blood pressure and visceral fat in young and middle-aged subjects.
pops_plus	25954050	20150509	9	lrp1, apob, apoe, sdc1, ldlr, lpl, angptl3, fatty acid, cholesterol	Inactivation of ANGPTL3 reduces hepatic VLDL-triglyceride secretion.
pops_plus	28119096	20170126	9	apoe, lipid, sod1, atherosclerosis, triglyceride, ldlr, abca1, cholesterol, cardiovascular	Hawthorn (Crataegus pinnatifida Bunge) leave flavonoids attenuate atherosclerosis development in apoE knock-out mice.
pops_plus	11872695	20020302	9	heart, type 2 diabetes, cetp, lipid, coronary heart, atherosclerosis, coronary, cholesterol, diabetes	Relationship between TaqIB cholesteryl ester transfer protein gene polymorphism and macrovascular complications in Japanese patients with type 2 diabetes.
pops_plus	15624283	20041231	9	heart, f2, lipid, coronary heart, coronary, hyperlipidemia, cholesterol, artery, triglycerides	Docosahexaenoic acid restores endothelial function in children with hyperlipidemia: results from the EARLY study.
pops_plus	19878569	20091103	9	lipc, cetp, coronary artery, atherosclerosis, coronary, lpl, cholesterol, artery, diabetes	Candidate genetic analysis of plasma high-density lipoprotein-cholesterol and severity of coronary atherosclerosis.
pops_plus	31221535	20190622	9	lipid, por, triglyceride, cd36, coronary, coronary artery, artery, triglycerides, diabetes	Plasma glucose, triglycerides, VLDL, leptin and resistin levels as potential biomarkers for myocardial fat in mice.
pops_plus	23074503	20121018	9	heart, coronary artery, coronary, met, stroke, cholesterol, artery, diabetes, cardiovascular	Multidetector computed tomography for coronary artery disease screening in asymptomatic populations: evidence-based analysis.
pops_plus	23054246	20121012	9	heart, pcsk9, apob, coronary heart, coronary, ldlr, gc, cholesterol, ldlrap1	Use of targeted exome sequencing as a diagnostic tool for Familial Hypercholesterolaemia.
pops_plus	11434189	20010704	9	heart, apoe, apob, coronary heart, coronary, lpl, abca1, cetp, apoa1	Genetics, postprandial lipemia and obesity.
pops_plus	17985658	20071108	9	apoe, apob, lipid, coronary, lipids, cholesterol, artery, apoa1, coronary artery	Apolipoprotein E polymorphism in Omani dyslipidemic patients with and without coronary artery disease.
pops_plus	35002384	20220110	9	lipid, abca1, triglyceride, coronary, coronary artery, cholesterol, artery, cardiovascular, diabetes	Assessment of genetic polymorphism associated with ATP-binding cassette transporter A1 (ABCA1) gene and fluctuations in serum lipid profile levels in patients with coronary artery disease.
pops_plus	22723175	20120623	9	heart, cetp, lipid, atherosclerosis, coronary, stroke, cholesterol, triglycerides, cardiovascular	HDL and CETP Inhibition: Will This DEFINE the Future?
pops_plus	15530894	20041109	9	heart, apoe, abcg5, coronary heart, coronary, hmgcr, cholesterol, cyp7a1, lipid	Pharmacogenetics of HMG-CoA reductase inhibitors: exploring the potential for genotype-based individualization of coronary heart disease management.
pops_plus	28899694	20170914	9	abcg1, lipid, atherosclerosis, triglyceride, abca1, hyperlipidemia, ldlr, fatty acid, cholesterol	Anti-atherosclerotic effect of hesperidin in LDLr<sup>-/-</sup> mice and its possible mechanism.
pops_plus	15072242	20040410	9	type 2 diabetes, apob, lipid, triglyceride, coronary, coronary artery, cholesterol, artery, diabetes	[Lipoprotein (a) and ischemic heart diseases in patients with type 2 diabetes].
pops_plus	23831006	20130709	9	lipid, ppp1r3b, cd36, pnpla2, fatty acid, hmgcr, cholesterol, triglycerides, lipids	Hepatic molecular responses to Bifidobacterium pseudocatenulatum CECT 7765 in a mouse model of diet-induced obesity.
pops_plus	29561990	20180322	9	lipa, pcsk9, apob, lipid, ldlr, apoe, cholesterol, ldlrap1, cardiovascular	Clinical, Anthropometric and Biochemical Characteristics of Patients with or without Genetically Confirmed Familial Hypercholesterolemia.
pops_plus	23812840	20130702	9	pcsk9, lipid, hyperlipidemia, fatty acid, cholesterol, cardiovascular, triglycerides, dyslipidemias, diabetes	The need for combination drug therapies in patients with complex dyslipidemia.
pops_plus	28921708	20170919	9	lipid, triglyceride, pparg, fatty acid, hmgcr, cholesterol, nfkb1, cyp7a1, diabetes	Scopoletin Supplementation Ameliorates Steatosis and Inflammation in Diabetic Mice.
pops_plus	28472298	20170505	9	igf1r, igf1, lipid, insr, cd36, fabp4, lpl, fatty acid, diabetes	Adiponectin stimulates lipid metabolism via AMPK in rabbit blastocysts.
pops_plus	29121499	20171110	9	apoe, cetp, lipid, atherosclerosis, triglyceride, hyperlipidemia, fatty acid, cholesterol, cardiovascular	Atorvastatin accelerates clearance of lipoprotein remnants generated by activated brown fat to further reduce hypercholesterolemia and atherosclerosis.
pops_plus	29133605	20171115	9	heart, pcsk9, peripheral vascular, coronary, stroke, pad, cholesterol, artery, cardiovascular	Low-Density Lipoprotein Cholesterol Lowering With Evolocumab and Outcomes in Patients With Peripheral Artery Disease: Insights From the FOURIER Trial (Further Cardiovascular Outcomes Research With PCSK9 Inhibition in Subjects With Elevated Risk).
pops_plus	32718233	20200729	9	lipa, pcsk9, apob, abcg5, ldlr, apoe, cholesterol, ldlrap1, lipid	Next-generation sequencing to confirm clinical familial hypercholesterolemia.
pops_plus	32701068	20200724	9	type 2 diabetes, pcsk9, apob, cd36, ldlr, hmgcr, cholesterol, diabetes, cardiovascular	LDL, LDL receptors, and PCSK9 as modulators of the risk for type 2 diabetes: a focus on white adipose tissue.
pops_plus	32712249	20200727	9	lipid, atherosclerosis, bad, fatty acid, cholesterol, artery, cardiovascular, triglycerides, lipids	Lipoprotein ability to exchange and remove lipids from model membranes as a function of fatty acid saturation and presence of cholesterol.
pops_plus	18369455	20080329	9	lipid, atherosclerosis, ldlr, coronary, stroke, mttp, cholesterol, artery, coronary artery	Transcriptional profiling uncovers a network of cholesterol-responsive atherosclerosis target genes.
pops_plus	26252223	20150808	9	type 2 diabetes, lipid, abca1, hnf4a, triglyceride, hnf1a, cholesterol, diabetes, cardiovascular	Genetic Variants Associated with Lipid Profiles in Chinese Patients with Type 2 Diabetes.
pops_plus	27578128	20160901	9	lipid, atherosclerosis, coronary, met, ldlr, cholesterol, artery, cardiovascular, coronary artery	Clinical and molecular characteristics of homozygous familial hypercholesterolemia patients: Insights from SAFEHEART registry.
pops_plus	33251210	20201130	9	type 2 diabetes, lipid, cebpa, prkaa2, irs1, pparg, srebf1, cholesterol, diabetes	New Amphiphilic Squalene Derivative Improves Metabolism of Adipocytes Differentiated From Diabetic Adipose-Derived Stem Cells and Prevents Excessive Lipogenesis.
pops_plus	17525004	20070526	9	apob, lipid, pon1, coronary, coronary artery, cholesterol, artery, apoa1, diabetes	PON1 activity is inversely related to LDL apoB carbonyl content in patients with coronary artery disease.
pops_plus	30504621	20181204	9	lipid, atherosclerosis, coronary, hyperlipidemia, angptl4, angptl3, artery, triglycerides, coronary artery	ANGPTL3 Inhibitors„ÄÄ- Their Role in Cardiovascular Disease Through Regulation of Lipid Metabolism.
pops_plus	30508567	20181204	9	apob, lipid, atherosclerosis, coronary, ldlr, lipids, cholesterol, cardiovascular, diabetes	Therapeutic effects of rosuvastatin in hypercholesterolemic prediabetic mice in the absence of low density lipoprotein receptor.
pops_plus	20167577	20100220	9	pcsk9, lipid, mlxipl, apoe, srebf1, lipids, abca1, sort1, galnt2	Analysis of lipid pathway genes indicates association of sequence variation near SREBF1/TOM1L2/ATPAF2 with dementia risk.
pops_plus	20185862	20100227	9	type 2 diabetes, coronary artery, atherosclerosis, triglyceride, ccs, coronary, artery, cardiovascular, diabetes	Relationship between cardiovascular autonomic neuropathy and coronary artery calcification in patients with type 2 diabetes.
pops_plus	28536104	20170525	9	heart, type 2 diabetes, coronary heart, coronary, met, stroke, cholesterol, diabetes, cardiovascular	Development and validation of QRISK3 risk prediction algorithms to estimate future risk of cardiovascular disease: prospective cohort study.
pops_plus	28538136	20170525	9	lipid, triglyceride, coronary, angptl3, cholesterol, artery, cardiovascular, triglycerides, coronary artery	Genetic and Pharmacologic Inactivation of ANGPTL3 and Cardiovascular Disease.
pops_plus	30195881	20180910	9	lipids, abcg5, scd, pon1, fatty acid, cholesterol, cyp7a1, triglycerides, lipid	Zingiber officinale extract administration diminishes steroyl-CoA desaturase gene expression and activity in hyperlipidemic hamster liver by reducing the oxidative and endoplasmic reticulum stress.
pops_plus	30219096	20180917	9	heart, apob, lipid, atherosclerosis, pon1, triglyceride, pltp, cholesterol, cardiovascular	Attenuation of atherogenic apo B-48-dependent hyperlipidemia and high density lipoprotein remodeling induced by vitamin C and E combination and their beneficial effect on lethal ischemic heart disease in mice.
pops_plus	31468232	20190831	9	heart, lipid, triglyceride, coronary, ahr, cholesterol, artery, cardiovascular, coronary artery	Ratio of triglyceride to high-density lipoprotein cholesterol and risk of major cardiovascular events in kidney transplant recipients.
pops_plus	33482195	20210122	9	coronary artery, triglyceride, coronary, lpl, angptl3, fatty acid, angptl4, artery, triglycerides	Comparison of angiopoietin-like protein 3 and 4 reveals structural and mechanistic similarities.
pops_plus	15773433	20050319	9	heart, coronary heart, atherosclerosis, ccs, coronary, cholesterol, artery, triglycerides, diabetes	[Angina pectoris in patients with aortic valvular stenosis].
pops_plus	15206126	20040623	9	heart, type 2 diabetes, apob, coronary heart, triglyceride, coronary, hyperlipidemia, cholesterol, diabetes	[New simple method for small, dense LDL: development of a new quantification method and clinical significance].
pops_plus	12421096	20021108	9	heart, apob, lipid, coronary heart, atherosclerosis, coronary, ldlr, cholesterol, cardiovascular	DNA testing for familial hypercholesterolemia: improving disease recognition and patient care.
pops_plus	8989507	19961201	9	heart, apob, coronary heart, atherosclerosis, lcat, coronary, stroke, lpl, diabetes	Lipoprotein(a) in health and disease.
pops_plus	8941468	19961201	9	heart, apob, coronary heart, coronary, lipids, cholesterol, cardiovascular, triglycerides, diabetes	Increased plasma apolipoprotein (a) levels in IDDM patients with diabetic nephropathy.
pops_plus	28523719	20170520	9	heart, type 2 diabetes, coronary artery, coronary, met, stroke, artery, diabetes, cardiovascular	Cardiovascular events associated with second-line anti-diabetes treatments: analysis of real-world Korean data.
pops_plus	21689002	20110622	9	type 2 diabetes, cetp, coronary artery, coronary, hyperlipidemia, cholesterol, artery, triglycerides, diabetes	Association between cholesteryl ester transfer protein TaqIB variants and risk of coronary artery disease and diabetes mellitus in the population of western Iran.
pops_plus	24019513	20130911	9	apob, lipid, abca1, triglyceride, mttp, lipids, cholesterol, triglycerides, fatty acid	Lipid absorption defects in intestine-specific microsomal triglyceride transfer protein and ATP-binding cassette transporter A1-deficient mice.
pops_plus	22916254	20120824	9	type 2 diabetes, lipid, triglyceride, tcf7l2, fatty acid, cholesterol, cardiovascular, triglycerides, diabetes	Effects of rs7903146 variation in the Tcf7l2 gene in the lipid metabolism of three different populations.
pops_plus	29289533	20180101	9	heart, apob, lipid, coronary heart, atherosclerosis, coronary, hyperlipidemia, ldlr, cholesterol	LDL Receptor Gene-ablated Hamsters: A Rodent Model of Familial Hypercholesterolemia With Dominant Inheritance and Diet-induced Coronary Atherosclerosis.
pops_plus	29301853	20180106	9	heart, lipids, lipid, ldlr, fatty acid, cholesterol, sort1, triglycerides, cardiovascular	(Pro)renin Receptor Inhibition Reprograms Hepatic Lipid Metabolism and Protects Mice From Diet-Induced Obesity and Hepatosteatosis.
pops_plus	24135527	20131019	9	pcsk9, coronary artery, irs1, triglyceride, zfhx3, coronary, stroke, artery, diabetes	Genetic susceptibility for ischemic infarction and arteriolosclerosis based on neuropathologic evaluations.
pops_plus	33190588	20201116	9	gpam, lipid, acox1, rps6kb1, triglyceride, pparg, fatty acid, ppara, actb	TXNIP/VDUP1 attenuates steatohepatitis via autophagy and fatty acid oxidation.
pops_plus	33193594	20201116	9	pcsk9, cetp, lipid, lcat, abca1, pon1, lpl, cholesterol, triglycerides	Candidate Gene Analysis Reveals Strong Association of <i>CETP</i> Variants With High Density Lipoprotein Cholesterol and <i>PCSK9</i> Variants With Low Density Lipoprotein Cholesterol in Ghanaian Adults: An AWI-Gen Sub-Study.
pops_plus	17142622	20061205	9	heart, pcsk9, apob, lipid, coronary heart, coronary, ldlr, cholesterol, kit	Genetic causes of familial hypercholesterolaemia in patients in the UK: relation to plasma lipid levels and coronary heart disease risk.
pops_plus	10657570	20000205	9	heart, apob, lipid, coronary heart, triglyceride, coronary, cholesterol, triglycerides, cardiovascular	Absence of association between genetic variation in the promoter of the microsomal triglyceride transfer protein gene and plasma lipoproteins in the Framingham Offspring Study.
pops_plus	30586346	20181227	9	apoe, lipid, atherosclerosis, triglyceride, ldlr, fatty acid, cholesterol, triglycerides, cardiovascular	Bempedoic acid: effects on lipoprotein metabolism and atherosclerosis.
pops_plus	25661015	20150210	9	apoe, coronary artery, atherosclerosis, coronary, lipids, cholesterol, artery, mif, diabetes	Attenuation of atherosclerotic lesions in diabetic apolipoprotein E-deficient mice using gene silencing of macrophage migration inhibitory factor.
pops_plus	25672030	20150213	9	apob, lipid, coronary, apoa1, coronary artery, cholesterol, artery, triglycerides, diabetes	Novel atherosclerotic risk factors and angiographic profile of young Gujarati patients with acute coronary syndrome.
pops_plus	25670362	20150212	9	heart, cetp, lipid, coronary heart, triglyceride, coronary, cholesterol, cardiovascular, diabetes	Effects of anacetrapib on plasma lipids in specific patient subgroups in the DEFINE (Determining the Efficacy and Tolerability of CETP INhibition with AnacEtrapib) trial.
pops_plus	25676271	20150214	9	apoe, apob, lipid, atherosclerosis, coronary, artery, diabetes, apoa1, coronary artery	Predictive value of apolipoprotein for coronary atherosclerosis in asymptomatic non-diabetic population.
pops_plus	25684840	20150217	9	coronary artery, triglyceride, coronary, met, pad, cholesterol, artery, cardiovascular, diabetes	Metabolic syndrome in patients undergoing coronary angiography.
pops_plus	22355267	20120223	9	heart, pcsk9, cetp, coronary heart, coronary, ldlr, hmgcr, cholesterol, cardiovascular	An anti-PCSK9 antibody reduces LDL-cholesterol on top of a statin and suppresses hepatocyte SREBP-regulated genes.
pops_plus	22345126	20120221	9	heart, cetp, coronary heart, coronary, lipids, cholesterol, artery, triglycerides, cardiovascular	Vascular effects and safety of dalcetrapib in patients with or at risk of coronary heart disease: the dal-VESSEL randomized clinical trial.
pops_plus	31635197	20191023	9	lipid, atherosclerosis, coronary, ldlr, cholesterol, artery, abca1, cardiovascular, coronary artery	Carvedilol Ameliorates Experimental Atherosclerosis by Regulating Cholesterol Efflux and Exosome Functions.
pops_plus	31647302	20191025	9	apob, abcg5, triglyceride, ldlr, mttp, hmgcr, cholesterol, cyp7a1, triglycerides	High-Fructose Diet-Induced Hypertriglyceridemia Is Associated With Enhanced Hepatic Expression of ACAT2 in Rats.
pops_plus	11557774	20010915	9	type 2 diabetes, lipid, atherosclerosis, cd36, hyperlipidemia, fatty acid, cholesterol, diabetes, lipids	The peroxisome proliferator-activated receptor delta promotes lipid accumulation in human macrophages.
pops_plus	18537058	20080610	9	heart, coronary artery, coronary, met, stroke, fatty acid, cholesterol, artery, cardiovascular	Quality of nutrition and health knowledge in subjects with diagnosed cardio-vascular diseases in the Polish population--National Multicentre Health Survey (WOBASZ).
pops_plus	12792173	20030607	9	heart, coronary artery, atherosclerosis, coronary, met, stroke, artery, diabetes, cardiovascular	Noninvasive assessment of spontaneous baroreflex sensitivity and heart rate variability in patients with carotid stenosis.
pops_plus	20590502	20100702	9	f2, cetp, lipid, pon1, ldlr, stroke, lpl, abca1, fgb	Genetic aspects of ischemic stroke: coagulation, homocysteine, and lipoprotein metabolism as potential risk factors.
pops_plus	21637672	20110604	9	apoe, apob, lipid, triglyceride, coronary, ldlr, cholesterol, artery, coronary artery	Effects of APOE, APOB and LDLR variants on serum lipids and lack of association with xanthelasma in individuals from Southeastern Brazil.
pops_plus	21627612	20110602	9	heart, apob, lipid, coronary heart, atherosclerosis, coronary, apoa1, cholesterol, triglycerides	[Key laboratory diagnostic biomarkers of coronary atherosclerosis].
pops_plus	20406163	20100422	9	type 2 diabetes, lipid, ppara, lpl, lipids, cholesterol, cardiovascular, triglycerides, diabetes	Fenofibrate and metabolic syndrome.
pops_plus	26381871	20150919	9	lipid, atherosclerosis, coronary, cyp27a1, lipids, cholesterol, artery, cardiovascular, coronary artery	Vitamin D Protects Against Atherosclerosis via Regulation of Cholesterol Efflux and Macrophage Polarization in Hypercholesterolemic Swine.
pops_plus	17765246	20070904	9	heart, pcsk9, apob, lipid, coronary heart, atherosclerosis, coronary, ldlr, cholesterol	Familial hypercholesterolaemia in Portugal.
pops_plus	16477380	20060216	9	apob, lipid, atherosclerosis, ldlr, lpl, fatty acid, cholesterol, triglycerides, lipids	Peroxisome proliferator-activated receptor-alpha selective ligand reduces adiposity, improves insulin sensitivity and inhibits atherosclerosis in LDL receptor-deficient mice.
pops_plus	28502092	20170515	9	heart, coronary artery, coronary, met, stroke, cholesterol, artery, diabetes, cardiovascular	HIV/HCV coinfection and the risk of cardiovascular disease: A meta-analysis.
pops_plus	22101914	20111122	9	apoe, lipid, atherosclerosis, coronary, lipids, cholesterol, artery, triglycerides, coronary artery	APOE -491 T allele may reduce the risk of atherosclerotic lesions among middle-aged women.
pops_plus	10634817	20000115	9	cetp, lipid, triglyceride, coronary, hyperlipidemia, cholesterol, artery, triglycerides, coronary artery	Action of atorvastatin in combined hyperlipidemia : preferential reduction of cholesteryl ester transfer from HDL to VLDL1 particles.
pops_plus	8873668	19961015	9	lipid, atherosclerosis, coronary, lpl, lipids, cholesterol, artery, cardiovascular, coronary artery	The Asp9 Asn mutation in the lipoprotein lipase gene is associated with increased progression of coronary atherosclerosis. REGRESS Study Group, Interuniversity Cardiology Institute, Utrecht, The Netherlands. Regression Growth Evaluation Statin Study.
pops_plus	10559018	19991113	9	lipid, lcat, triglyceride, coronary, hyperlipidemia, cholesterol, artery, triglycerides, coronary artery	Linkage of a candidate gene locus to familial combined hyperlipidemia: lecithin:cholesterol acyltransferase on 16q.
pops_plus	24607852	20140311	9	heart, apob, coronary heart, atherosclerosis, coronary, lipids, cholesterol, apoa1, cardiovascular	Chronic kidney disease, lipids and apolipoproteins, and coronary heart disease: the ARIC study.
pops_plus	24632267	20140318	9	pcsk9, apob, lipid, triglyceride, coronary, cholesterol, artery, cardiovascular, coronary artery	The severe hypercholesterolemia phenotype: clinical diagnosis, management, and emerging therapies.
pops_plus	29848931	20180601	9	heart, apoe, cetp, lipid, mlxipl, coronary heart, lepr, lipids, coronary	Study of the association of 17 lipid-related gene polymorphisms with coronary heart disease.
pops_plus	32296725	20200417	9	heart, coronary heart, coronary, stroke, scd, cholesterol, diabetes, triglycerides, cardiovascular	Global Electrical Heterogeneity: Mechanisms and Clinical Significance.
pops_plus	24704238	20140408	9	gpam, srebf1, pnpla2, scd, elovl6, pparg, fabp4, lpl, fatty acid	Overfeeding energy upregulates peroxisome proliferator-activated receptor (PPAR)Œ≥-controlled adipogenic and lipolytic gene networks but does not affect proinflammatory markers in visceral and subcutaneous adipose depots of Holstein cows.
pops_plus	23173569	20121124	9	apoe, apob, lipid, triglyceride, coronary, cholesterol, artery, cardiovascular, coronary artery	Identification of the HDL-ApoCIII to VLDL-ApoCIII ratio as a predictor of coronary artery disease in the general population: the Chin-Shan Community Cardiovascular Cohort (CCCC) study in Taiwan.
pops_plus	12964943	20030911	9	lipc, apoe, apob, coronary artery, coronary, lipid, lpl, artery, cardiovascular	Genetic study of common variants at the Apo E, Apo AI, Apo CIII, Apo B, lipoprotein lipase (LPL) and hepatic lipase (LIPC) genes and coronary artery disease (CAD): variation in LIPC gene associates with clinical outcomes in patients with established CAD.
pops_plus	21589926	20110519	9	lipc, cetp, lipid, cholesterol, triglyceride, lpl, trib1, abca1, apoa1	Knowledge-driven multi-locus analysis reveals gene-gene interactions influencing HDL cholesterol level in two independent EMR-linked biobanks.
pops_plus	22308070	20120207	9	heart, type 2 diabetes, lipid, coronary heart, hp, coronary, cholesterol, triglycerides, diabetes	Helicobacter pylori Infection and Inflammation: Implication for the Pathophysiology of Diabetes and Coronary Heart Disease in Asian Indians.
pops_plus	29593575	20180330	9	type 2 diabetes, lipid, ppara, cd36, lepr, fatty acid, cholesterol, diabetes, lipids	Dai-Zong-Fang, A Traditional Chinese Herbal Formula, Ameliorates Insulin Resistance in <i>db/db</i> Mice.
pops_plus	10638202	20000119	9	cetp, coronary artery, atherosclerosis, lcat, triglyceride, coronary, lpl, cholesterol, artery	[Recent advanced knowledges related with lipoprotein metabolism].
pops_plus	10638224	20000119	9	heart, lipid, triglyceride, coronary, lpl, lipids, cholesterol, artery, coronary artery	[Efficacy of hormone replacement therapy on hyperlipidemia].
pops_plus	30864165	20190314	9	heart, lipid, coronary heart, coronary, met, stroke, cholesterol, triglycerides, cardiovascular	Mediterranean-style diet for the primary and secondary prevention of cardiovascular disease.
pops_plus	28846118	20170829	9	heart, apob, lipid, coronary heart, coronary, hmgcr, cholesterol, cetp, cardiovascular	Association of Genetic Variants Related to CETP Inhibitors and Statins With Lipoprotein Levels and Cardiovascular Risk.
pops_plus	28830468	20170824	9	heart, apob, lipid, coronary heart, coronary, lipids, cholesterol, triglycerides, cardiovascular	Prediction of future cardiovascular disease with an equation to estimate apolipoprotein B in patients with high cardiovascular risk: an analysis from the TNT and IDEAL study.
pops_plus	26718096	20160101	9	heart, pcsk9, lipid, coronary, coronary artery, cholesterol, artery, cardiovascular, diabetes	Lipids, blood pressure and kidney update 2015.
pops_plus	11714860	20011121	9	heart, apoe, lipid, coronary heart, coronary, lpl, lipids, cholesterol, triglycerides	Lipoprotein lipase and apoE polymorphisms: relationship to hypertriglyceridemia during pregnancy.
pops_plus	10208494	19990420	9	apob, lipid, coronary, lipids, cholesterol, artery, cardiovascular, triglycerides, coronary artery	Influence of mild to moderately elevated triglycerides on low density lipoprotein subfraction concentration and composition in healthy men with low high density lipoprotein cholesterol levels.
pops_plus	30679475	20190126	9	apoe, apob, coronary artery, coronary, lipids, cholesterol, artery, triglycerides, diabetes	The effect of apolipoprotein E polymorphism on serum metabolome - a population-based 10-year follow-up study.
pops_plus	8879439	19960927	9	heart, apoe, apob, vldlr, coronary heart, triglyceride, coronary, hyperlipidemia, cholesterol	Effects of gemfibrozil on very-low-density lipoprotein composition and low-density lipoprotein size in patients with hypertriglyceridemia or combined hyperlipidemia.
pops_plus	22988513	20120919	9	gpam, srebf1, lipid, scd, acox1, cd36, mttp, fatty acid, pck1	Hepatic Metabolic, Inflammatory, and Stress-Related Gene Expression in Growing Mice Consuming a Low Dose of Trans-10, cis-12-Conjugated Linoleic Acid.
pops_plus	12708635	20030424	9	heart, lipid, coronary heart, triglyceride, coronary, met, cholesterol, dyslipidemias, diabetes	New features of the National Cholesterol Education Program Adult Treatment Panel III lipid-lowering guidelines.
pops_plus	23193212	20121130	9	type 2 diabetes, lipid, akt1, cdkn1a, atherosclerosis, pparg, vegfa, artery, diabetes	Antioxidized LDL antibodies are associated with different metabolic pathways in patients with atherosclerotic plaque and type 2 diabetes.
pops_plus	17211855	20070111	9	type 2 diabetes, apob, lipid, triglyceride, lpl, lipids, cholesterol, cetp, diabetes	Differential effect of pioglitazone (PGZ) and rosiglitazone (RGZ) on postprandial glucose and lipid metabolism in patients with type 2 diabetes mellitus: a prospective, randomized crossover study.
pops_plus	17217373	20070116	9	type 2 diabetes, cetp, coronary artery, coronary, cholesterol, artery, cardiovascular, triglycerides, diabetes	CETP inhibition in cardiovascular risk management: a critical appraisal.
pops_plus	30922848	20190330	9	abcg1, cetp, abcg5, atherosclerosis, pon1, ldlr, abca1, cholesterol, cyp7a1	Effects of exercise on reverse cholesterol transport: A systemized narrative review of animal studies.
pops_plus	30923733	20190330	9	type 2 diabetes, apoe, lipid, triglyceride, lipids, cholesterol, diabetes, triglycerides, fatty acid	<i>APOE</i> Œµ4, the door to insulin-resistant dyslipidemia and brain fog? A case study.
pops_plus	30354205	20181026	9	heart, apob, lipid, coronary heart, sdc1, triglyceride, coronary, ldlr, cholesterol	Deletion of Lymphangiogenic and Angiogenic Growth Factor VEGF-D Leads to Severe Hyperlipidemia and Delayed Clearance of Chylomicron Remnants.
pops_plus	30362921	20181027	9	heart, coronary artery, coronary, met, stroke, cholesterol, artery, diabetes, cardiovascular	Primary Prevention Using Cholesterol-Lowering Medications in Patients Meeting New Treatment Guidelines: A Retrospective Cohort Analysis.
pops_plus	9785050	19981024	9	cetp, lipid, atherosclerosis, lcat, triglyceride, lpl, lipids, cholesterol, triglycerides	Lipoprotein physiology.
pops_plus	23370735	20130202	9	heart, lipid, coronary heart, atherosclerosis, coronary, met, cholesterol, triglycerides, cardiovascular	Status of dyslipidemia treatment in Japanese adults: an analysis of the 2009 Japan Society of Ningen Dock database.
pops_plus	1680788	19910901	9	heart, apob, lipid, coronary heart, triglyceride, coronary, cholesterol, cetp, triglycerides	Polymorphisms of the gene encoding cholesterol ester transfer protein and serum lipoprotein levels in subjects with and without coronary heart disease.
pops_plus	9587674	19980520	9	heart, coronary artery, coronary heart, atherosclerosis, lcat, coronary, cholesterol, artery, cardiovascular	High density lipoproteins and coronary heart disease. Future prospects in gene therapy.
pops_plus	24848708	20140523	9	heart, type 2 diabetes, lipid, atherosclerosis, hyperlipidemia, met, cholesterol, cardiovascular, diabetes	Update on screening, etiology, and treatment of dyslipidemia in children.
pops_plus	27713142	20161008	9	pcsk9, lipid, atherosclerosis, triglyceride, coronary, hyperlipidemia, cholesterol, dyslipidemias, cardiovascular	Novel circulating lipid measurements for current dyslipidemias in non-treated patients undergoing coronary angiography: PCSK9, apoC3 and sdLDL-C.
pops_plus	34044829	20210528	8	heart, pcsk9, apob, coronary artery, coronary heart, coronary, artery, diabetes	Pcsk9 is associated with severity of coronary artery lesions in male patients with premature myocardial infarction.
pops_plus	34011801	20210520	8	pcsk9, apob, abcg5, ldlr, apoe, cholesterol, ldlrap1, lipid	Genetic Analysis of Japanese Children Clinically Diagnosed with Familial Hypercholesterolemia.
pops_plus	34015391	20210520	8	type 2 diabetes, apob, lipid, atherosclerosis, cholesterol, cardiovascular, triglycerides, diabetes	Low-density lipoprotein cholesterol-to-apolipoprotein B ratio as a potential indicator of LDL particle size and plasma atherogenicity in type 2 diabetes.
pops_plus	34019847	20210521	8	type 2 diabetes, pcsk9, lipid, atherosclerosis, triglyceride, cholesterol, cardiovascular, diabetes	Proprotein Convertase Subtilisin/Kexin Type 9: A View beyond the Canonical Cholesterol-Lowering Impact.
pops_plus	34040350	20210527	8	lipid, atherosclerosis, triglyceride, hyperlipidemia, abcg5, cholesterol, cardiovascular, diabetes	Canagliflozin Facilitates Reverse Cholesterol Transport Through Activation of AMPK/ABC Transporter Pathway.
pops_plus	18414186	20080417	8	heart, cetp, lipid, coronary heart, atherosclerosis, coronary, cholesterol, dyslipidemias	HDL metabolism and CETP inhibition.
pops_plus	18418429	20080418	8	apoe, apob, lipid, atherosclerosis, fatty acid, cholesterol, triglycerides, cardiovascular	Lipid and lipoprotein profile in women with polycystic ovary syndrome.
pops_plus	19292048	20090319	8	heart, type 2 diabetes, coronary artery, coronary heart, pon1, coronary, artery, diabetes	[Relationships between PON1 L55M polymorphism and coronary heart diseases complicated with fasting hyperglycemia in Han populations in Guangdong].
pops_plus	34838043	20211128	8	coronary artery, abca1, coronary, lipids, cholesterol, artery, kit, cardiovascular	Phospholipase A2 group IIA correlates with circulating high-density lipoprotein cholesterol and modulates cholesterol efflux possibly through regulation of PPAR-Œ≥/LXR-Œ±/ABCA1 in macrophages.
pops_plus	34806127	20211122	8	lipid, atherosclerosis, ccs, coronary, cardiovascular, artery, diabetes, coronary artery	Improvement of Coronary Calcium Scores After Bariatric Surgery in People with Severe Obesity.
pops_plus	34804396	20211122	8	apob, lipid, triglyceride, coronary, cholesterol, artery, cardiovascular, coronary artery	Association of serum 25-Hydroxy Vitamin D level with lipid, lipoprotein, and apolipoprotein level.
pops_plus	34808682	20211122	8	heart, coronary artery, ccs, coronary, stroke, artery, diabetes, cardiovascular	Prognosis and Clinical Results after Coronary Artery Bypass Operation in Young Patients Aged &lt;45 Years: Chances and Limitations of a New Therapy Option.
pops_plus	10888240	20000711	8	heart, apob, coronary artery, atherosclerosis, coronary, stroke, cholesterol, artery	Atherosclerosis risk factors: the possible role of homocysteine.
pops_plus	29410709	20180208	8	dnmt1, coronary artery, atherosclerosis, coronary, hyperlipidemia, cholesterol, artery, diabetes	Genomic 5-mC contents in peripheral blood leukocytes were independent protective factors for coronary artery disease with a specific profile in different leukocyte subtypes.
pops_plus	29413998	20180208	8	heart, type 2 diabetes, pcsk9, lipid, pad, artery, diabetes, cardiovascular	Lipid-lowering treatment in peripheral artery disease.
pops_plus	1750805	19910101	8	heart, coronary heart, atherosclerosis, lcat, coronary, fatty acid, cholesterol, triglycerides	Lecithin:cholesterol acyltransferase activity in patients with acute myocardial infarction and coronary heart disease.
pops_plus	2010691	19910101	8	apoe, cetp, lcat, triglyceride, lipids, cholesterol, apob, fatty acid	Familial cholesteryl ester transfer protein deficiency is associated with triglyceride-rich low density lipoproteins containing cholesteryl esters of probable intracellular origin.
pops_plus	28192240	20170214	8	cetp, lipid, lcat, atherosclerosis, pon1, hyperlipidemia, cholesterol, cardiovascular	Effects of curcumin on HDL functionality.
pops_plus	11409295	20010621	8	type 2 diabetes, lipid, atherosclerosis, pon1, coronary, artery, diabetes, coronary artery	Paraoxonase 1 192 Gln/Arg gene polymorphism and cerebrovascular disease: interaction with type 2 diabetes.
pops_plus	11423509	20010626	8	type 2 diabetes, apob, lipid, lipids, cholesterol, cardiovascular, triglycerides, diabetes	Cross-sectional and prospective associations between proinsulin and cardiovascular disease risk factors in a population experiencing rapid cultural transition.
pops_plus	17257774	20070130	8	heart, type 2 diabetes, coronary heart, coronary, scd, lipids, fatty acid, diabetes	Obesity - a perspective based on the biochemical interrelationship of lipids and carbohydrates.
pops_plus	17458880	20070427	8	lipid, abca1, cd36, coronary, cd14, cholesterol, artery, coronary artery	Monocyte cholesterol homeostasis correlates with the presence of detergent resistant membrane microdomains.
pops_plus	17456471	20070426	8	apoe, coronary artery, atherosclerosis, coronary, lipids, artery, cardiovascular, lipid	Atherogenic lipids induce adhesion of human coronary artery smooth muscle cells to macrophages by up-regulating chemokine CX3CL1 on smooth muscle cells in a TNFalpha-NFkappaB-dependent manner.
pops_plus	17462654	20070428	8	heart, type 2 diabetes, apob, coronary heart, triglyceride, coronary, cholesterol, diabetes	Remarkable increase of apolipoprotein B48 level in diabetic patients with end-stage renal disease.
pops_plus	17464986	20070428	8	lipid, atherosclerosis, triglyceride, apoa1, lipids, cardiovascular, triglycerides, fatty acid	Polymorphism in microsomal triglyceride transfer protein: a link between liver disease and atherogenic postprandial lipid profile in NASH?
pops_plus	24176024	20131102	8	lipc, apob, lipid, lipg, lipids, cholesterol, cetp, apoa1	TaqIB polymorphism in the cholesteryl ester transfer protein (CETP) gene influences lipid responses to the consumption of kiwifruit in hypercholesterolaemic men.
pops_plus	18656198	20080729	8	apoe, apob, lipid, atherosclerosis, cholesterol, artery, triglycerides, cardiovascular	Relationship of the ApoE polymorphism to plasma lipid traits among South Asians, Chinese, and Europeans living in Canada.
pops_plus	18660489	20080729	8	lipc, cetp, add1, ptpn11, hnf4a, nrip1, lpl, cholesterol	Multiple genetic variants along candidate pathways influence plasma high-density lipoprotein cholesterol concentrations.
pops_plus	24201112	20131109	8	apob, lipid, triglyceride, coronary, hyperlipidemia, artery, triglycerides, coronary artery	Small RNA overcomes the challenges of therapeutic targeting of microsomal triglyceride transfer protein.
pops_plus	9157946	19970501	8	heart, lipid, coronary heart, triglyceride, coronary, hyperlipidemia, lpl, cholesterol	No evidence of linkage between familial combined hyperlipidemia and genes encoding lipolytic enzymes in Finnish families.
pops_plus	29208769	20171207	8	heart, lipid, timd4, coronary heart, triglyceride, coronary, stroke, cholesterol	Association between the <i>TIMD4-HAVCR1</i> variants and serum lipid levels, coronary heart disease and ischemic stroke risk and atorvastatin lipid-lowering efficacy.
pops_plus	25204474	20140911	8	heart, coronary artery, coronary heart, ccs, coronary, artery, diabetes, cardiovascular	Serum osteoprotegerin in relation to metabolic status, severity, and estimated risk of subsequent coronary heart disease.
pops_plus	25201910	20140910	8	heart, lipid, atherosclerosis, triglyceride, abca1, cholesterol, diabetes, cardiovascular	miR33 inhibition overcomes deleterious effects of diabetes mellitus on atherosclerosis plaque regression in mice.
pops_plus	25233041	20140919	8	coronary artery, atherosclerosis, coronary, rbp4, cholesterol, artery, triglycerides, cardiovascular	Retinol-binding protein 4 as a novel risk factor for cardiovascular disease in patients with coronary artery disease and hyperinsulinemia.
pops_plus	26445568	20151008	8	heart, pcsk9, coronary heart, atherosclerosis, coronary, ldlr, cholesterol, cardiovascular	Hypercholesterolemia, low density lipoprotein receptor and proprotein convertase subtilisin/kexin-type 9.
pops_plus	23422832	20130221	8	pcsk9, abcg5, abca1, cd36, ldlr, lipids, cholesterol, lipid	PCSK9 plays a significant role in cholesterol homeostasis and lipid transport in intestinal epithelial cells.
pops_plus	21447785	20110331	8	apoe, apob, lipid, atherosclerosis, triglyceride, coronary, cholesterol, diabetes	Spontaneously diabetic Ins2(+/Akita):apoE-deficient mice exhibit exaggerated hypercholesterolemia and atherosclerosis.
pops_plus	31526636	20190919	8	heart, coronary artery, por, peripheral vascular, coronary, stroke, artery, cardiovascular	Cardiovascular responses to low-intensity isometric handgrip exercise in coronary artery disease: effects of posture.
pops_plus	26026653	20150601	8	pcsk9, coronary artery, atherosclerosis, coronary, cholesterol, artery, cardiovascular, diabetes	Diabetes with poor glycaemic control does not promote atherosclerosis in genetically modified hypercholesterolaemic minipigs.
pops_plus	26050484	20150609	8	heart, type 2 diabetes, atherosclerosis, coronary, hyperlipidemia, cd14, diabetes, cardiovascular	[Content of circulating endothelial progenitor cells in patients with chronic ischemic heart failure with preserved left ventricular ejection fraction].
pops_plus	25130684	20140819	8	cetp, lipid, apom, pon1, triglyceride, cholesterol, triglycerides, diabetes	Gestational diabetes mellitus modulates neonatal high-density lipoprotein composition and its functional heterogeneity.
pops_plus	17617298	20070710	8	lipid, coronary, hyperlipidemia, met, cholesterol, artery, cardiovascular, coronary artery	Prevalence and treatment of dyslipidemia in Canadian primary care: a retrospective cohort analysis.
pops_plus	27422940	20160717	8	heart, pcsk9, coronary artery, coronary, met, cholesterol, artery, cardiovascular	Association of Exome Sequences With Cardiovascular Traits Among Blacks in the Jackson Heart Study.
pops_plus	15138631	20040513	8	type 2 diabetes, cetp, lipid, triglyceride, type ii diabetes, cholesterol, cardiovascular, diabetes	Taq1B polymorphism of CETP gene on lipid abnormalities in patients with type II diabetes mellitus.
pops_plus	23613796	20130425	8	abcg1, cetp, abcg5, cholesterol, lcat, fatty acid, abca1, cyp7a1	Omega 3 fatty acids promote macrophage reverse cholesterol transport in hamster fed high fat diet.
pops_plus	16176166	20050924	8	coronary artery, triglyceride, coronary, apoa1, cholesterol, artery, triglycerides, cardiovascular	Apolipoprotein A5 and triglyceridemia. Focus on the effects of the common variants.
pops_plus	27050191	20160407	8	pcsk9, apob, lipid, coronary, ldlr, cholesterol, artery, coronary artery	Diagnostic Yield and Clinical Utility of Sequencing Familial Hypercholesterolemia Genes in Patients With Severe Hypercholesterolemia.
pops_plus	27049268	20160407	8	heart, pcsk9, coronary artery, coronary heart, triglyceride, coronary, cholesterol, artery	Correlation of serum PCSK9 in CHD patients with the severity of coronary arterial lesions.
pops_plus	16517147	20060307	8	heart, lipid, cd36, fatty acid, cholesterol, diabetes, triglycerides, lipids	Induction of Cd36 expression elicited by fish oil PUFA in spontaneously hypertensive rats.
pops_plus	33766515	20210326	8	apoe, cetp, lipid, atherosclerosis, triglyceride, lipids, cholesterol, cardiovascular	Cannabinoid type 1 receptor inverse agonism attenuates dyslipidemia and atherosclerosis in APOE‚àó3-Leiden.CETP mice.
pops_plus	33766756	20210326	8	lipid, hyperlipidemia, ldlr, fatty acid, cholesterol, cyp7a1, triglycerides, cardiovascular	Effects of Danhong injection on dyslipidemia and cholesterol metabolism in high-fat diets fed rats.
pops_plus	33742447	20210320	8	heart, gpam, lipid, scd, triglyceride, elovl6, pparg, fatty acid	Elongase of very long chain fatty acids 6 (ELOVL6) promotes lipid synthesis in buffalo mammary epithelial cells.
pops_plus	32739470	20200803	8	pcsk9, lipid, atherosclerosis, triglyceride, apoe, lipids, cholesterol, fatty acid	Activation of estrogen receptor Œ± (ERŒ±) is required for Alisol B23-acetate to prevent post-menopausal atherosclerosis and reduced lipid accumulation.
pops_plus	32739681	20200803	8	apoe, lipid, atherosclerosis, cd36, coronary, cholesterol, artery, coronary artery	Angiopoietin-like protein 8 accelerates atherosclerosis in ApoE<sup>-/</sup><sup>-</sup> mice.
pops_plus	32762347	20200809	8	heart, apob, lipid, coronary heart, atherosclerosis, coronary, apoa1, diabetes	Comparisons of Risk Factors for Abdominal Aortic Aneurysm and Coronary Heart Disease: A Prospective Cohort Study.
pops_plus	24429380	20140117	8	heart, coronary artery, atherosclerosis, coronary, ahr, stroke, artery, cardiovascular	Risk of cardiovascular disease associated with HCV and HBV coinfection among antiretroviral-treated HIV-infected individuals.
pops_plus	24429801	20140117	8	coronary artery, atherosclerosis, coronary, cholesterol, artery, mif, triglycerides, diabetes	Increased expression of macrophage migration inhibitory factor in aorta of patients with coronary atherosclerosis.
pops_plus	19509018	20090611	8	type 2 diabetes, atherosclerosis, ldlr, fatty acid, cholesterol, diabetes, triglycerides, lipids	Genetic disruption of myostatin reduces the development of proatherogenic dyslipidemia and atherogenic lesions in Ldlr null mice.
pops_plus	16497661	20060225	8	heart, coronary heart, atherosclerosis, lcat, triglyceride, coronary, cholesterol, apoa1	Characterization of a new mouse model for human apolipoprotein A-I/C-III/A-IV deficiency.
pops_plus	16567835	20060329	8	type 2 diabetes, lipid, coronary, met, cholesterol, cardiovascular, triglycerides, diabetes	Adult Treatment Panel III 2001 but not International Diabetes Federation 2005 criteria of the metabolic syndrome predict clinical cardiovascular events in subjects who underwent coronary angiography.
pops_plus	26666260	20151216	8	heart, apob, coronary heart, atherosclerosis, triglyceride, coronary, lipids, cholesterol	Lipids and lipoproteins and inflammatory markers in patients with chronic apical periodontitis.
pops_plus	26671304	20151217	8	heart, lipid, coronary heart, atherosclerosis, coronary, bad, cholesterol, cardiovascular	Think Again About Cholesterol Survey.
pops_plus	28352326	20170330	8	type 2 diabetes, lipid, hnf4a, triglyceride, tcf7l2, cholesterol, triglycerides, diabetes	Genetic variants in <i>KCNJ11</i>, <i>TCF7L2</i> and <i>HNF4A</i> are associated with type 2 diabetes, BMI and dyslipidemia in families of Northeastern Mexico: A pilot study.
pops_plus	22577432	20120512	8	apob, lipid, triglyceride, coronary, lipids, cholesterol, artery, coronary artery	Correlation between body fat distribution, plasma lipids and apolipoproteins with the severity of coronary involvement in patients with stable angina.
pops_plus	23152888	20121116	8	type 2 diabetes, coronary artery, triglyceride, coronary, abca1, artery, cardiovascular, diabetes	The ABCA1 gene R230C variant is associated with decreased risk of premature coronary artery disease: the genetics of atherosclerotic disease (GEA) study.
pops_plus	29483388	20180228	8	heart, apoe, atherosclerosis, triglyceride, stroke, cholesterol, artery, cardiovascular	Tongxinluo Improves Apolipoprotein E-Deficient Mouse Heart Function.
pops_plus	31434739	20190823	8	abcg5, scd, cholesterol, ldlr, srebf1, fatty acid, abca1, lipid	Sex-specific hepatic lipid and bile acid metabolism alterations in <i>Fancd2-</i>deficient mice following dietary challenge.
pops_plus	31436336	20190823	8	heart, pcsk9, apob, lipid, coronary heart, coronary, ldlr, cholesterol	A modified algorithm with lipoprotein(a) added for diagnosis of familial hypercholesterolemia.
pops_plus	31436349	20190823	8	heart, pcsk9, cetp, ldlr, coronary, stroke, apoe, hmgcr	Pharmacogenetics of statins treatment: Efficacy and safety.
pops_plus	31437479	20190823	8	abcg1, apoe, lipid, atherosclerosis, abca1, cholesterol, triglycerides, cardiovascular	The detrimental effect of asymmetric dimethylarginine on cholesterol efflux of macrophage foam cells: Role of the NOX/ROS signaling.
pops_plus	17403600	20070404	8	coronary artery, hp, triglyceride, coronary, lipids, cholesterol, artery, cardiovascular	Ion transport, membrane fluidity and haemoglobin conformation in erythrocyte from patients with cardiovascular diseases: Role of augmented plasma cholesterol.
pops_plus	24283500	20131129	8	cetp, lipid, atherosclerosis, coronary, coronary artery, cholesterol, artery, diabetes	CETP gene polymorphisms and risk of coronary atherosclerosis in a Chinese population.
pops_plus	19597296	20090715	8	heart, type 2 diabetes, coronary artery, coronary heart, coronary, rbp4, artery, diabetes	Retinol binding protein-4 is associated with TNF-alpha and not insulin resistance in subjects with type 2 diabetes mellitus and coronary heart disease.
pops_plus	12476935	20021213	8	heart, cetp, lipid, atherosclerosis, coronary, hyperlipidemia, ldlr, triglycerides	Gene polymorphism and coronary risk factors in Indian population.
pops_plus	9026529	19960201	8	apob, lipid, triglyceride, lpl, lipids, cholesterol, triglycerides, diabetes	Lack of association of the apolipoprotein A-I-C-III-A-IV gene XmnI and SstI polymorphisms and of the lipoprotein lipase gene mutations in familial combined hyperlipoproteinemia in French Canadian subjects.
pops_plus	26497592	20151027	8	lrp1, coronary artery, coronary, ldlr, apoe, gc, artery, diabetes	The rs1803274 polymorphism of the BCHE gene is associated with an increased risk of coronary in-stent restenosis.
pops_plus	26482752	20151021	8	pcsk9, apob, lipid, met, ldlr, cholesterol, cetp, cardiovascular	New Approaches in Detection and Treatment of Familial Hypercholesterolemia.
pops_plus	26483237	20151021	8	abcg5, triglyceride, hyperlipidemia, ldlr, fatty acid, cholesterol, cyp7a1, lipid	[Effects of intrauterine growth restriction and high-fat diet on serum lipid and transcriptional levels of related hepatic genes in rats].
pops_plus	26483836	20151021	8	apob, lipid, apoa1, lpl, lipids, cholesterol, cetp, triglycerides	Lipid changes due to fenofibrate treatment are not associated with changes in DNA methylation patterns in the GOLDN study.
pops_plus	30098854	20180813	8	heart, coronary artery, peripheral vascular, coronary, hyperlipidemia, artery, ahr, cardiovascular	Relationship between pneumonia and cardiovascular diseases: A retrospective cohort study of the general population.
pops_plus	30091215	20180810	8	heart, type 2 diabetes, coronary artery, coronary heart, coronary, ahr, artery, diabetes	Risk of heart failure in a population with type 2 diabetes versus a population without diabetes with and without coronary heart disease.
pops_plus	17113061	20061123	8	heart, coronary heart, atherosclerosis, lcat, coronary, abca1, cholesterol, apoa1	Do mutations causing low HDL-C promote increased carotid intima-media thickness?
pops_plus	9706227	19980826	8	heart, cetp, lipid, coronary heart, coronary, pltp, lipids, cholesterol	Plasma lipid transfer proteins, high-density lipoproteins, and reverse cholesterol transport.
pops_plus	18991244	20081111	8	apob, lipids, apoa1, fatty acid, cholesterol, diabetes, triglycerides, cardiovascular	Biochemical effects of consumption of eggs containing omega-3 polyunsaturated fatty acids.
pops_plus	18993152	20081111	8	lipid, abca1, coronary, coronary artery, cholesterol, artery, triglycerides, diabetes	Comparison of treatment of severe high-density lipoprotein cholesterol deficiency in men with daily atorvastatin (20 mg) versus fenofibrate (200 mg) versus extended-release niacin (2 g).
pops_plus	18996286	20081111	8	lipid, abca1, coronary, coronary artery, gc, cholesterol, artery, cardiovascular	Common variants in the ATP-binding cassette transporter 1 gene with decreased HDL-cholesterol levels and coronary artery disease.
pops_plus	21211357	20110108	8	heart, coronary heart, coronary, met, stroke, cholesterol, triglycerides, cardiovascular	[The distribution and influential factors of serum high sensitivity C-reactive protein in general population].
pops_plus	24987033	20140703	8	heart, pcsk9, apob, lipid, coronary heart, coronary, ldlr, cholesterol	Whole exome sequencing of familial hypercholesterolaemia patients negative for LDLR/APOB/PCSK9 mutations.
pops_plus	27460841	20160728	8	abcg1, apoe, lipid, atherosclerosis, stroke, abca1, cholesterol, cardiovascular	A novel small molecule liver X receptor transcriptional regulator, nagilactone B, suppresses atherosclerosis in apoE-deficient mice.
pops_plus	18561934	20080620	8	heart, coronary artery, coronary heart, atherosclerosis, coronary, met, artery, cardiovascular	Markers of inflammation and coronary artery calcification: a systematic review.
pops_plus	15819286	20050412	8	lipid, coronary, met, coronary artery, pad, cholesterol, artery, diabetes	Lipid-lowering therapy in patients with peripheral arterial disease: are guidelines being met?
pops_plus	19567523	20090702	8	prdm16, heart, type 2 diabetes, coronary artery, atherosclerosis, coronary, artery, diabetes	Uncoupling protein-1 and related messenger ribonucleic acids in human epicardial and other adipose tissues: epicardial fat functioning as brown fat.
pops_plus	19573556	20090704	8	apob, lipid, atherosclerosis, coronary, cholesterol, artery, cardiovascular, coronary artery	Aged garlic extract supplemented with B vitamins, folic acid and L-arginine retards the progression of subclinical atherosclerosis: a randomized clinical trial.
pops_plus	25225679	20140917	8	cetp, lipid, lipg, lpl, pltp, lipids, cholesterol, galnt2	Adiposity significantly modifies genetic risk for dyslipidemia.
pops_plus	14967092	20040218	8	lipid, pon1, triglyceride, coronary, lipids, cholesterol, artery, coronary artery	[Paraoxonase 1 gene 192 polymorphism, physical activity and lipoprotein in women].
pops_plus	25212235	20140913	8	heart, coronary artery, atherosclerosis, coronary, ldlr, cholesterol, artery, cardiovascular	The effects of diet on occlusive coronary artery atherosclerosis and myocardial infarction in scavenger receptor class B, type 1/low-density lipoprotein receptor double knockout mice.
pops_plus	17292720	20070213	8	lipid, atherosclerosis, triglyceride, kit, rbp4, cholesterol, triglycerides, cardiovascular	Association of serum retinol binding protein 4 and insulin resistance in apparently healthy adolescents.
pops_plus	29198898	20171205	8	lipid, abca1, triglyceride, coronary, hyperlipidemia, cholesterol, artery, coronary artery	Levels of prebeta-1 high-density lipoprotein are elevated in 3 phenotypes of dyslipidemia.
pops_plus	29199201	20171205	8	type 2 diabetes, apoe, apob, lipid, triglyceride, cholesterol, diabetes, cardiovascular	Effects of a Dipeptidyl Peptidase 4 Inhibitor Sitagliptin on Glycemic Control and Lipoprotein Metabolism in Patients with Type 2 Diabetes Mellitus (GLORIA Trial).
pops_plus	29201096	20171205	8	type 2 diabetes, triglyceride, hyperlipidemia, gc, fatty acid, cholesterol, triglycerides, diabetes	Antihyperglycemic Effect of <i>Rosa Damascena</i> is Mediated by PPAR.Œ≥ Gene Expression in Animal Model of Insulin Resistance.
pops_plus	14962947	20040214	8	lipid, atherosclerosis, coronary, cholesterol, artery, abca1, apoa1, coronary artery	In-depth haplotype analysis of ABCA1 gene polymorphisms in relation to plasma ApoA1 levels and myocardial infarction.
pops_plus	28168401	20170208	8	apob, lipid, atherosclerosis, triglyceride, lpl, cholesterol, diabetes, cardiovascular	Dyslipidemia in systemic lupus erythematosus.
pops_plus	34474934	20210903	8	heart, coronary heart, coronary, lpl, angptl3, fatty acid, angptl4, triglycerides	A VLP-based vaccine targeting ANGPTL3 lowers plasma triglycerides in mice.
pops_plus	34490591	20210907	8	heart, pcsk9, coronary artery, stroke, coronary, lipid, artery, cardiovascular	A¬†Review of¬†the Clinical Pharmacology¬†of Pelacarsen: A Lipoprotein(a)-Lowering Agent.
pops_plus	34488621	20210907	8	type 2 diabetes, lipid, cd36, fabp4, fatty acid, cholesterol, diabetes, cardiovascular	MiR-100 overexpression attenuates high fat diet induced weight gain, liver steatosis, hypertriglyceridemia and development of metabolic syndrome in mice.
pops_plus	34491909	20210907	8	apoe, atherosclerosis, triglyceride, lpl, cholesterol, diabetes, triglycerides, cardiovascular	CREBH normalizes dyslipidemia and halts atherosclerosis in diabetes by decreasing circulating remnant lipoproteins.
pops_plus	33650435	20210302	8	heart, pcsk9, coronary artery, coronary heart, atherosclerosis, coronary, artery, cardiovascular	Very High Coronary Artery Calcium (‚â•1000) and Association With Cardiovascular Disease Events, Non-Cardiovascular Disease Outcomes, and Mortality: Results From MESA.
pops_plus	33652261	20210302	8	type 2 diabetes, lipid, atherosclerosis, fabp4, stroke, lipids, diabetes, cardiovascular	Akebia saponin D ameliorates metabolic syndrome (MetS) via remodeling gut microbiota and attenuating intestinal barrier injury.
pops_plus	33655372	20210303	8	type 2 diabetes, pcsk9, triglyceride, fatty acid, cholesterol, cardiovascular, triglycerides, diabetes	Mechanisms and Treatment of Dyslipidemia in Diabetes.
pops_plus	33643062	20210301	8	type 2 diabetes, pcsk9, apob, triglyceride, lipids, cholesterol, diabetes, cardiovascular	New Insights Into the Regulation of Lipoprotein Metabolism by PCSK9: Lessons From Stable Isotope Tracer Studies in Human Subjects.
pops_plus	33673728	20210306	8	heart, cetp, coronary heart, lcat, coronary, cholesterol, triglycerides, cardiovascular	Obesity Affects HDL Metabolism, Composition and Subclass Distribution.
pops_plus	33661432	20210304	8	heart, coronary, met, stroke, pad, cholesterol, artery, cardiovascular	Evaluating a Simple Approach to Identify Adults Meeting the 2018 AHA/ACC Cholesterol Guideline Definition of Very High Risk for Atherosclerotic Cardiovascular Disease.
pops_plus	33686460	20210309	8	type 2 diabetes, pcsk9, coronary artery, coronary, fatty acid, artery, cardiovascular, diabetes	Preventing Diabetes and Atherosclerosis in the Cardiometabolic Syndrome.
pops_plus	32845075	20200827	8	pcsk9, lipid, atherosclerosis, coronary, cholesterol, artery, cardiovascular, coronary artery	Morphological stabilization and regression of carotid plaque following therapy with evolocumab in a high-risk patient.
pops_plus	32821464	20200822	8	apoe, apob, coronary artery, coronary, hyperlipidemia, artery, fgb, cardiovascular	Evaluation of Cases with Myotonia Congenita for Cardiovascular Risk.
pops_plus	32825226	20200823	8	heart, tet2, asxl1, coronary heart, atherosclerosis, coronary, jak2, cardiovascular	Clonal Hematopoiesis of Indeterminate Potential: A Multidisciplinary Challenge in Personalized Hematology.
pops_plus	21316437	20110215	8	lipid, triglyceride, coronary, hyperlipidemia, cholesterol, artery, cyp7a1, coronary artery	Lipid-lowering and antioxidant activities of Jiang-Zhi-Ning in Traditional Chinese Medicine.
pops_plus	21316934	20110215	8	apob, coronary artery, triglyceride, coronary, apoa1, cholesterol, artery, triglycerides	Phytosterols supplementation decreases plasma small and dense LDL levels in metabolic syndrome patients on a westernized type diet.
pops_plus	21310417	20110212	8	heart, apob, lipid, coronary heart, atherosclerosis, coronary, ldlr, cholesterol	An APEX-based genotyping microarray for the screening of 168 mutations associated with familial hypercholesterolemia.
pops_plus	28666712	20170702	8	lipc, apob, lipid, triglyceride, hyperlipidemia, lipids, cholesterol, cetp	The association between six genetic variants and blood lipid levels in pregnant Chinese Han women.
pops_plus	28674132	20170705	8	heart, pcsk9, lipid, coronary, coronary artery, cholesterol, artery, cardiovascular	Exploration into lipid management and persistent risk in patients hospitalised for acute coronary syndrome in Japan (EXPLORE-J): protocol for a prospective observational study.
pops_plus	11772294	20020105	8	heart, cetp, lipid, coronary heart, triglyceride, coronary, cholesterol, diabetes	Novel agents for managing dyslipidaemia.
pops_plus	24569539	20140227	8	type 2 diabetes, scd, triglyceride, fatty acid, cholesterol, cardiovascular, triglycerides, diabetes	Association between erythrocyte membrane fatty acids and biomarkers of dyslipidemia in the EPIC-Potsdam study.
pops_plus	31272931	20190706	8	heart, pcsk9, coronary heart, coronary, stroke, cholesterol, diabetes, cardiovascular	Effects of alirocumab on cardiovascular and metabolic outcomes after acute coronary syndrome in patients with or without diabetes: a prespecified analysis of the ODYSSEY OUTCOMES randomised controlled trial.
pops_plus	33043593	20201012	8	type 2 diabetes, pcsk9, apob, triglyceride, cd36, ldlr, cholesterol, diabetes	White Adipose Tissue Surface Expression of LDLR and CD36 is Associated with Risk Factors for Type 2 Diabetes in Adults with Obesity.
pops_plus	33051044	20201014	8	prdm16, lipid, acox1, cd36, lpl, fatty acid, ppara, aco1	Taurine supplementation associated with exercise increases mitochondrial activity and fatty acid oxidation gene expression in the subcutaneous white adipose tissue of obese women.
pops_plus	33074778	20201019	8	pcsk9, coronary artery, stroke, coronary, lipid, pad, artery, cardiovascular	Lipid-lowering therapies in peripheral artery disease: A review.
pops_plus	12177161	20020815	8	apob, lipid, triglyceride, hyperlipidemia, fatty acid, cholesterol, triglycerides, cardiovascular	Effects of sirolimus on plasma lipids, lipoprotein levels, and fatty acid metabolism in renal transplant patients.
pops_plus	25887459	20150419	8	lipid, rbp4, lipids, hmgcr, cholesterol, gata4, gas6, diabetes	Polycystic ovarian syndrome is accompanied by repression of gene signatures associated with biosynthesis and metabolism of steroids, cholesterol and lipids.
pops_plus	25885422	20150418	8	heart, lipid, triglyceride, coronary, fatty acid, hmgcr, artery, coronary artery	Danqi Pill regulates lipid metabolism disorder induced by myocardial ischemia through FATP-CPTI pathway.
pops_plus	23109406	20121031	8	heart, apob, coronary heart, atherosclerosis, coronary, cholesterol, diabetes, cardiovascular	Apolipoproteins do not add prognostic information beyond lipoprotein cholesterol measures among individuals with obesity and insulin resistance syndromes: the ARIC study.
pops_plus	18624022	20080716	8	heart, coronary heart, triglyceride, coronary, met, cholesterol, diabetes, cardiovascular	Prevalence of metabolic syndrome among inpatients with schizophrenia.
pops_plus	10412780	19990721	8	heart, lipid, atherosclerosis, lcat, triglyceride, lipids, cholesterol, cardiovascular	Serum lipids status in patients with diabetic uremia on 10 years of maintenance hemodialysis.
pops_plus	10412822	19990721	8	apob, lipid, atherosclerosis, triglyceride, coronary, cholesterol, artery, coronary artery	Soluble vascular cell-adhesion molecule-1 and soluble intercellular adhesion molecule-1 correlate with lipid and apolipoprotein risk factors for coronary artery disease in children.
pops_plus	31619061	20191018	8	lipid, atherosclerosis, triglyceride, cd36, ldlr, fatty acid, cholesterol, cardiovascular	Replacing Saturated Fat With Unsaturated Fat in Western Diet Reduces Foamy Monocytes and Atherosclerosis in Male <i>Ldlr</i><sup><i>-/-</i></sup> Mice.
pops_plus	31619994	20191018	8	heart, stat3, cyp1a1, cyp2b6, ahr, vegfa, jak2, flt1	Integrating Pharmacokinetics Study, Network Analysis, and Experimental Validation to Uncover the Mechanism of Qiliqiangxin Capsule Against Chronic Heart Failure.
pops_plus	1770292	19911101	8	apoe, apob, lcat, hyperlipidemia, fatty acid, cholesterol, triglycerides, lipids	Hyperlipoproteinemia in Nagase analbuminemic rats: effects of pravastatin on plasma (apo)lipoproteins and lecithin:cholesterol acyltransferase activity.
pops_plus	26764329	20160115	8	apoe, lipid, atherosclerosis, coronary, cholesterol, artery, triglycerides, coronary artery	Aged Garlic Extract Suppresses the Development of Atherosclerosis in Apolipoprotein E-Knockout Mice.
pops_plus	26769833	20160116	8	heart, lipid, atherosclerosis, ccs, coronary, artery, diabetes, coronary artery	Perivascular tissue mediated relaxation - a novel player in human vascular tone regulation.
pops_plus	26777559	20160119	8	lipid, vldlr, triglyceride, cd36, ldlr, lpl, lipids, fatty acid	Expression of lipases and lipid receptors in sperm storage tubules and possible role of fatty acids in sperm survival in the hen oviduct.
pops_plus	20799898	20100831	8	cetp, coronary artery, atherosclerosis, coronary, lipids, cholesterol, artery, triglycerides	Cholesteryl ester transfer protein Taq1B polymorphism in an angiographically assessed Turkish population: no effects on coronary artery disease risk.
pops_plus	27137820	20160504	8	heart, lipid, scd, coronary, coronary artery, cholesterol, artery, diabetes	[Arrhythmia, device interventions and mortality analysis in patients with implanted cardioverter-defibrillator with/without resynchronisation therapy in dilative cardiomyopathy in primary prevention of sudden cardiac death].
pops_plus	9691807	19980806	8	heart, apoe, cetp, lipid, coronary heart, coronary, ldlr, apob	[Molecular biology in the diagnosis of cardiovascular diseases].
pops_plus	27332083	20160623	8	abcg1, apoe, lipid, cholesterol, lcat, lipids, abca1, apoa1	Distinct Roles of Apolipoproteins A1 and E in the Modulation of High-Density Lipoprotein Composition and Function.
pops_plus	25775905	20150318	8	heart, pcsk9, apob, lipid, coronary heart, atherosclerosis, coronary, cholesterol	[Familial hypercholesterolemia due to a new mutation in the low density lipoprotein receptor gene].
pops_plus	25780608	20150318	8	coronary artery, triglyceride, coronary, met, cholesterol, artery, triglycerides, cardiovascular	Assessment of potential biomarkers of subclinical vitamin K deficiency in patients with end-stage kidney disease.
pops_plus	27326018	20160622	8	heart, apob, lipid, triglyceride, pten, fatty acid, cholesterol, cardiovascular	The relationship among brain natriuretic peptide (BNP), cholesterol and lipoprotein.
pops_plus	25773378	20150317	8	heart, pcsk9, lipid, coronary heart, coronary, stroke, cholesterol, cardiovascular	Efficacy and safety of alirocumab in reducing lipids and cardiovascular events.
pops_plus	22199371	20111227	8	apoe, atherosclerosis, irs1, triglyceride, insr, fatty acid, cholesterol, artery	Accelerated atherosclerosis in Apoe-/- mice heterozygous for the insulin receptor and the insulin receptor substrate-1.
pops_plus	24341666	20131218	8	type 2 diabetes, lipid, apom, coronary, coronary artery, cholesterol, artery, diabetes	A single-nucleotide polymorphism in the proximal promoter region of the apolipoprotein M gene is associated with dyslipidaemia but not increased coronary artery diseases in Chinese populations.
pops_plus	32522195	20200612	8	cetp, lipid, atherosclerosis, lcat, lipids, cholesterol, triglycerides, cardiovascular	Androgen deprivation therapy improves the in vitro capacity of high-density lipoprotein (HDL) to receive cholesterol and other lipids in patients with prostate carcinoma.
pops_plus	32523442	20200612	8	heart, pcsk9, lipid, coronary heart, coronary, cholesterol, diabetes, cardiovascular	Proprotein convertase subtilisin/kexin type 9: an update on the cardiovascular outcome studies.
pops_plus	32546237	20200618	8	apoe, coronary artery, atherosclerosis, coronary, cholesterol, artery, triglycerides, diabetes	Association between apolipoprotein E gene polymorphism and the risk of coronary artery disease in Hakka postmenopausal women in southern China.
pops_plus	12116231	20020713	8	heart, cetp, triglyceride, lipids, cholesterol, diabetes, triglycerides, cardiovascular	Candidate genes involved in cardiovascular risk factors by a family-based association study on the island of Kosrae, Federated States of Micronesia.
pops_plus	15284530	20040731	8	heart, coronary artery, coronary heart, atherosclerosis, pon1, coronary, cholesterol, artery	Association of paraoxonase-1 M55L genotype and alcohol consumption with coronary atherosclerosis: the Helsinki Sudden Death Study.
pops_plus	32469502	20200530	8	heart, pcsk9, coronary heart, ldlr, coronary, bad, cholesterol, triglycerides	Artificial Platelets for Efficient siRNA Delivery to Clear "Bad Cholesterol".
pops_plus	33361854	20201228	8	heart, tp53, coronary heart, coronary, vegfa, stat3, bcl2, cardiovascular	CHANGES IN GENE EXPRESSION ASSOCIATED WITH NON-CANCER EFFECTS OF THE CHORNOBYL CLEAN-UP WORKERS IN THE REMOTE PERIOD AFTER EXPOSURE.
pops_plus	19632679	20090728	8	apob, lipid, atherosclerosis, triglyceride, ldlr, lpl, cholesterol, triglycerides	Differential effects of activation of liver X receptor on plasma lipid homeostasis in wild-type and lipoprotein clearance-deficient mice.
pops_plus	33343620	20201221	8	heart, pcsk9, apob, lipid, ldlr, apoe, cholesterol, cardiovascular	Genetics of Hypercholesterolemia: Comparison Between Familial Hypercholesterolemia and Hypercholesterolemia Nonrelated to LDL Receptor.
pops_plus	34905955	20211215	8	apoe, coronary artery, coronary, ldlr, mylip, lipids, artery, lipid	Pharmacogenetic loci for rosuvastatin are associated with intima-media thickness change and coronary artery disease risk.
pops_plus	34908864	20211215	8	apoe, apob, lipid, coronary, cholesterol, artery, triglycerides, coronary artery	Apolipoprotein E Gene Polymorphism and Coronary Artery Disease Risk Among Patients in Northwest China.
pops_plus	34910067	20211215	8	heart, coronary artery, coronary, bad, cholesterol, artery, diabetes, cardiovascular	Factors associated with cardiovascular disease in the Brazilian adult population: National Health Survey, 2019.
pops_plus	34902352	20211213	8	abcg5, acox1, triglyceride, abcb11, lipids, cholesterol, cyp7a1, cardiovascular	Microsomal triglyceride transfer protein inhibitor lomitapide-induced liver toxicity is ameliorated by Triiodothyronine treatment following improved bile homeostasis and Œ≤-oxidation.
pops_plus	34895801	20211213	8	lipid, atherosclerosis, lcat, triglyceride, cholesterol, cardiovascular, triglycerides, diabetes	Vascular inflammation and impaired reverse cholesterol transport and lipid metabolism in obese children and adolescents.
pops_plus	34901209	20211213	8	heart, apob, lipid, coronary heart, coronary, stroke, cholesterol, cardiovascular	The Associations of Lipid Profiles With Cardiovascular Diseases and Death in a 10-Year Prospective Cohort Study.
pops_plus	34887932	20211210	8	heart, tp53, lipid, coronary heart, atherosclerosis, coronary, pparg, pik3r1	Exploring the Therapeutic Mechanisms of Huzhang-Shanzha Herb Pair against Coronary Heart Disease by Network Pharmacology and Molecular Docking.
pops_plus	28220878	20170222	8	type 2 diabetes, lipid, triglyceride, tcf7l2, lipids, cholesterol, triglycerides, diabetes	Homozygous carriers of the TCF7L2 rs7903146 T-allele show altered postprandial response in triglycerides and triglyceride-rich lipoproteins.
pops_plus	28235710	20170226	8	heart, pcsk9, apob, lipid, coronary heart, atherosclerosis, coronary, ldlr	The genetic spectrum of familial hypercholesterolemia in the central south region of China.
pops_plus	34556050	20210924	8	heart, coronary heart, atherosclerosis, coronary, ldlr, cholesterol, diabetes, cardiovascular	LDLR gene polymorphism (rs688) affects susceptibility to cardiovascular disease in end-stage kidney disease patients.
pops_plus	34561430	20210925	8	heart, pcsk9, cetp, coronary heart, coronary, stroke, lipids, diabetes	Cholesteryl ester transfer protein (CETP) as a drug target for cardiovascular disease.
pops_plus	34550777	20210922	8	type 2 diabetes, pcsk9, lipid, coronary, cardiovascular, artery, diabetes, coronary artery	<i>PCSK9</i> E670G (rs505151) Variant and Coronary Artery Disease Risk Among Diabetics.
pops_plus	34541816	20210920	8	heart, pcsk9, lipid, coronary heart, atherosclerosis, peripheral vascular, coronary, apoe	LincRNA-p21 alleviates atherosclerosis progression through regulating the miR-221/SIRT1/Pcsk9 axis.
pops_plus	28506971	20170517	8	heart, cetp, lipid, coronary heart, coronary, lipids, cholesterol, triglycerides	Protein-Truncating Variants at the Cholesteryl Ester Transfer Protein Gene and Risk for Coronary Heart Disease.
pops_plus	14704742	20040106	8	apoe, lipid, atherosclerosis, cd36, ldlr, fatty acid, abca1, cholesterol	Macrophages, inflammation, and atherosclerosis.
pops_plus	19150509	20090120	8	cetp, cholesterol, lcat, apoa1, pltp, lipids, abca1, triglycerides	PXR agonism decreases plasma HDL levels in ApoE3-Leiden.CETP mice.
pops_plus	19155782	20090122	8	heart, apoe, apob, lipid, coronary heart, triglyceride, coronary, hyperlipidemia	The environmental and genetic evidence for the association of hyperlipidemia and hypertension.
pops_plus	2520696	19890101	8	heart, coronary artery, coronary heart, atherosclerosis, coronary, scd, artery, diabetes	A statistical study of sudden cardiac death for past five years in Osaka medical, investigated at the Osaka Medical Examiner's Office.
pops_plus	20211823	20100310	8	heart, lipid, coronary heart, coronary, met, cholesterol, triglycerides, cardiovascular	Outcomes of a multidisciplinary partnership to improve cardiac wellness: an opportunity for pharmacists.
pops_plus	15495112	20041021	8	heart, coronary heart, coronary, met, lipids, cholesterol, triglycerides, diabetes	Low glycaemic index diets for coronary heart disease.
pops_plus	12454276	20021128	8	apoe, atherosclerosis, triglyceride, hyperlipidemia, lpl, lipids, cholesterol, triglycerides	Overexpression of apoC-I in apoE-null mice: severe hypertriglyceridemia due to inhibition of hepatic lipase.
pops_plus	31337960	20190725	8	heart, lipid, timd4, coronary heart, coronary, stroke, cholesterol, triglycerides	<i>TIMD4</i> rs6882076 SNP Is Associated with Decreased Levels of Triglycerides and the Risk of Coronary Heart Disease and Ischemic Stroke.
pops_plus	31345219	20190727	8	pcsk9, lipid, atherosclerosis, ldlr, lipids, cholesterol, triglycerides, cardiovascular	Integrative analysis of loss-of-function variants in clinical and genomic data reveals novel genes associated with cardiovascular traits.
pops_plus	31323736	20190721	8	heart, coronary heart, atherosclerosis, coronary, hyperlipidemia, ldlr, lipids, cholesterol	Dietary Cholesterol Is Highly Associated with Severity of Hyperlipidemia and Atherosclerotic Lesions in Heterozygous LDLR-Deficient Hamsters.
pops_plus	25610061	20150123	8	heart, cetp, lipid, triglyceride, coronary, cholesterol, artery, coronary artery	The relationship between genetic variations of the cholesteryl ester transfer protein gene and coronary artery disease in Turkish subjects.
pops_plus	25597500	20150120	8	heart, triglyceride, lpl, fatty acid, angptl4, diabetes, triglycerides, cardiovascular	Lipoprotein lipase and angiopoietin-like 4 - Cardiomyocyte secretory proteins that regulate metabolism during diabetic heart disease.
pops_plus	22854712	20120803	8	apob, lipid, atherosclerosis, coronary, cetp, cholesterol, artery, coronary artery	Four polymorphisms of cholesteryl ester transfer protein gene and coronary stenosis in a Tunisian population.
pops_plus	22846213	20120801	8	type 2 diabetes, coronary artery, pon1, coronary, lipids, artery, triglycerides, diabetes	Paraoxonase-1 is not associated with coronary artery calcification in type 2 diabetes: results from the PREDICT study.
pops_plus	27562454	20160827	8	lipc, cetp, coronary artery, coronary, ldlr, lpl, artery, fgb	An in-house multilocus SNP genotyping assay for evaluation of complex genetic diseases.
pops_plus	27565303	20160828	8	type 2 diabetes, apob, lipid, triglyceride, lipids, diabetes, triglycerides, fatty acid	In Vitro effect of DDE exposure on the regulation of lipid metabolism and secretion in McA-RH7777 hepatocytes: A potential role in dyslipidemia which may increase the risk of type 2 diabetes mellitus.
pops_plus	18036131	20071127	8	heart, apob, lipid, atherosclerosis, lipids, diabetes, triglycerides, cardiovascular	Relationship of highly sensitive C-reactive protein and lipid levels in adolescents with type 1 diabetes mellitus.
pops_plus	23298374	20130110	8	apob, lipid, atherosclerosis, triglyceride, hyperlipidemia, lipids, cholesterol, artery	Alogliptin ameliorates postprandial lipemia and postprandial endothelial dysfunction in non-diabetic subjects: a preliminary report.
pops_plus	30954631	20190408	8	heart, lipid, srebf1, fatty acid, cholesterol, fads1, triglycerides, cardiovascular	Serelaxin (recombinant human relaxin-2) treatment affects the endogenous synthesis of long chain poly-unsaturated fatty acids and induces substantial alterations of lipidome and metabolome profiles in rat cardiac tissue.
pops_plus	23756254	20130613	8	heart, apoe, apob, lipid, atherosclerosis, ldlr, angptl4, lpl	The effects of VEGF-A on atherosclerosis, lipoprotein profile, and lipoprotein lipase in hyperlipidaemic mouse models.
pops_plus	23767408	20130618	8	srebf1, lipid, scd, pparg, fabp4, lpl, fatty acid, lipids	Expression of genes controlling fat deposition in two genetically diverse beef cattle breeds fed high or low silage diets.
pops_plus	8218104	19931101	8	heart, apoe, apob, lipid, coronary heart, coronary, cholesterol, triglycerides	Parental history of early myocardial infarction is associated with decreased levels of lipoparticle AI in adolescents.
pops_plus	22546076	20120502	8	type 2 diabetes, triglyceride, cd36, irs1, insr, cholesterol, triglycerides, diabetes	Multiple factors and pathways involved in hepatic very low density lipoprotein-apoB100 overproduction in Otsuka Long-Evans Tokushima Fatty rats.
pops_plus	26859786	20160210	8	type 2 diabetes, apoe, lipid, triglyceride, f2, lipids, cholesterol, diabetes	Mapping and Congenic Dissection of Genetic Loci Contributing to Hyperglycemia and Dyslipidemia in Mice.
pops_plus	26859812	20160210	8	heart, type 2 diabetes, pcsk9, lipid, triglyceride, cholesterol, triglycerides, diabetes	Using human genetics to predict the effects and side-effects of drugs.
pops_plus	26876916	20160216	8	heart, cetp, coronary heart, coronary, stroke, lpl, cholesterol, cardiovascular	Therapeutic potential of chalcones as cardiovascular agents.
pops_plus	20700531	20100812	8	heart, type 2 diabetes, coronary heart, triglyceride, aldh2, coronary, cholesterol, diabetes	The association of alcohol and alcohol metabolizing gene variants with diabetes and coronary heart disease risk factors in a white population.
pops_plus	20713650	20100818	8	abcg1, apob, lipid, cholesterol, triglyceride, hyperlipidemia, abca1, cetp	Postprandial lipemia enhances the capacity of large HDL2 particles to mediate free cholesterol efflux via SR-BI and ABCG1 pathways in type IIB hyperlipidemia.
pops_plus	20715933	20100819	8	apob, coronary artery, atherosclerosis, triglyceride, coronary, lipids, cholesterol, diabetes	Apolipoprotein B and non-high-density lipoprotein cholesterol are better risk markers for coronary artery disease than low-density lipoprotein cholesterol in hypertriglyceridemic metabolic syndrome patients.
pops_plus	17369521	20070321	8	heart, lipid, scd, cd36, fatty acid, cholesterol, triglycerides, diabetes	Loss of stearoyl-CoA desaturase-1 improves insulin sensitivity in lean mice but worsens diabetes in leptin-deficient obese mice.
pops_plus	17372331	20070321	8	heart, lipid, abcg1, coronary heart, atherosclerosis, coronary, cholesterol, abca1	Common ABCA1 variants, HDL levels, and cellular cholesterol efflux in subjects with familial low HDL.
pops_plus	28025677	20161228	8	heart, pcsk9, lipid, coronary heart, coronary, cholesterol, diabetes, cardiovascular	PCSK9 inhibition: the dawn of a new age in cholesterol lowering?
pops_plus	27993383	20161221	8	heart, pcsk9, lipid, coronary heart, peripheral vascular, coronary, stroke, cholesterol	Old challenges and new opportunities in the clinical management of heterozygous familial hypercholesterolemia (HeFH): The promises of PCSK9 inhibitors.
pops_plus	27997977	20161221	8	type 2 diabetes, scd, cd36, fatty acid, tf, diabetes, triglycerides, lipids	Regulation of Hepatocellular Fatty Acid Uptake in Mouse Models of Fatty Liver Disease with and without Functional Leptin Signaling: Roles of NfKB and SREBP-1C and the Effects of Spexin.
pops_plus	10521378	19991016	8	apoe, apob, lipid, atherosclerosis, triglyceride, coronary, artery, coronary artery	Detection, quantification, and characterization of potentially atherogenic triglyceride-rich remnant lipoproteins.
pops_plus	20047560	20100106	8	type 2 diabetes, apob, lipids, cholesterol, artery, cardiovascular, triglycerides, diabetes	Fenofibrate improves endothelial function in the brachial artery and forearm resistance arterioles of statin-treated Type 2 diabetic patients.
pops_plus	33453161	20210116	8	heart, coronary artery, coronary, hyperlipidemia, met, artery, ahr, diabetes	African American-Caucasian American differences in aortic valve replacement in patients with severe aortic stenosis.
pops_plus	33453241	20210116	8	apoe, lipid, atherosclerosis, srebf1, fatty acid, abca1, cholesterol, cardiovascular	Testosterone stimulates cholesterol clearance from human macrophages by activating LXRŒ±.
pops_plus	33440605	20210114	8	type 2 diabetes, lipid, triglyceride, fabp4, lipids, cholesterol, diabetes, fatty acid	Anti-Obesity and Anti-Adipogenic Effects of Chitosan Oligosaccharide (GO2KA1) in SD Rats and in 3T3-L1 Preadipocytes Models.
pops_plus	33442380	20210114	8	apoe, lipid, atherosclerosis, triglyceride, ldlr, fatty acid, abca1, cholesterol	Nuclear Factor Erythroid 2 Related Factor 2 Activator JC-5411 Inhibits Atherosclerosis Through Suppression of Inflammation and Regulation of Lipid Metabolism.
pops_plus	33465804	20210119	8	pcsk9, lipid, triglyceride, fatty acid, cholesterol, cardiovascular, triglycerides, diabetes	[Diabetic Dyslipidemia].
pops_plus	18828733	20081003	8	type 2 diabetes, igf1, gck, lepr, insr, cholesterol, triglycerides, diabetes	Anthropometry, carbohydrate and lipid metabolism in the East Flanders Prospective Twin Survey: linkage of candidate genes using two sib-pair based variance components analyses.
pops_plus	7773726	19950601	8	heart, apob, lipid, coronary heart, triglyceride, coronary, cholesterol, triglycerides	Oxidation-related analytes and lipid and lipoprotein concentrations in healthy subjects.
pops_plus	24529144	20140218	8	heart, coronary heart, atherosclerosis, cd36, coronary, ldlr, cholesterol, triglycerides	Long-term vitamin E supplementation reduces atherosclerosis and mortality in Ldlr-/- mice, but not when fed Western style diet.
pops_plus	27464494	20160729	8	heart, coronary artery, coronary heart, atherosclerosis, coronary, plcg1, artery, cardiovascular	MiR-30s Family Inhibit the Proliferation and Apoptosis in Human Coronary Artery Endothelial Cells Through Targeting the 3'UTR Region of ITGA4 and PLCG1.
pops_plus	20519088	20100604	8	heart, type 2 diabetes, coronary artery, ccs, coronary, artery, diabetes, cardiovascular	Clinical manifestations and risk factors of coronary artery disease in patients with diabetes mellitus in western Siberia.
pops_plus	32394403	20200513	8	heart, coronary artery, peripheral vascular, coronary, met, artery, diabetes, cardiovascular	Prognostic value of coronary risk factors, exercise capacity and single photon emission computed tomography in liver transplantation candidates: A 5-year follow-up study.
pops_plus	32404104	20200515	8	heart, type 2 diabetes, coronary heart, coronary, ahr, stroke, diabetes, cardiovascular	Association of sleep disturbance with risk of cardiovascular disease and all-cause mortality in patients with new-onset type 2 diabetes: data from the Korean NHIS-HEALS.
pops_plus	33270233	20201203	8	heart, lipid, coronary heart, atherosclerosis, coronary, hyperlipidemia, cholesterol, cyp7a1	Effect of Zanthoxylum alkylamides on lipid metabolism and its mechanism in rats fed with a high-fat diet.
pops_plus	33287201	20201208	8	heart, type 2 diabetes, apoe, lipid, atherosclerosis, cholesterol, diabetes, cardiovascular	Dapagliflozin Does Not Modulate Atherosclerosis in Mice with Insulin Resistance.
pops_plus	33287461	20201208	8	type 2 diabetes, coronary artery, atherosclerosis, coronary, fabp4, artery, cardiovascular, diabetes	Fatty-Acid-Binding Protein 4 as a Novel Contributor to Mononuclear Cell Activation and Endothelial Cell Dysfunction in Atherosclerosis.
pops_plus	16297474	20051122	8	type 2 diabetes, lipid, triglyceride, coronary, met, cholesterol, cardiovascular, diabetes	The relation between impaired glucose tolerance and slow coronary flow.
pops_plus	10807540	20000512	8	lipid, coronary, hyperlipidemia, ldlr, cholesterol, artery, triglycerides, coronary artery	Co-segregation of elevated LDL with a novel mutation (D92K) of the LDL receptor in a kindred with multiple lipoprotein abnormalities.
pops_plus	34966274	20211230	8	heart, apoe, lipid, coronary heart, atherosclerosis, triglyceride, coronary, cholesterol	Tanyu Tongzhi Formula Delays Atherosclerotic Plaque Progression by Promoting Alternative Macrophage Activation <i>via</i> PPARŒ≥ and AKT/ERK Signal Pathway in ApoE Knock-Out Mice.
pops_plus	34966782	20211230	8	lipid, atherosclerosis, triglyceride, hyperlipidemia, ldlr, lipids, cholesterol, cardiovascular	The <i>Cordyceps militaris</i>-Derived Polysaccharide CM1 Alleviates Atherosclerosis in LDLR<sup>(-/-)</sup> Mice by Improving Hyperlipidemia.
pops_plus	28365671	20170403	8	cyp1a1, lipid, triglyceride, coronary, cholesterol, artery, cardiovascular, coronary artery	Genetic polymorphisms of the CYP1A1, GSTM1, and GSTT1 enzymes and their influence on cardiovascular risk and lipid profile in people who live near a natural gas plant.
pops_plus	16842481	20060718	8	heart, type 2 diabetes, peripheral vascular, kit, stroke, cholesterol, diabetes, cardiovascular	Hormone replacement therapy is associated with increased C-reactive protein in women with Type 2 diabetes in the Diabetes Heart Study.
pops_plus	28362475	20170401	8	heart, coronary heart, atherosclerosis, tcf7l2, coronary, srebf1, diabetes, cardiovascular	The genetic basis of obesity complications.
pops_plus	7850954	19950215	8	heart, f2, coronary artery, coronary heart, coronary, cholesterol, artery, cardiovascular	Testosterone relaxes rabbit coronary arteries and aorta.
pops_plus	19673941	20090814	8	heart, lipid, coronary heart, abca1, triglyceride, coronary, lipids, cholesterol	Effect of R219K polymorphism of the ABCA1 gene on the lipid-lowering effect of pravastatin in Chinese patients with coronary heart disease.
pops_plus	34146172	20210619	8	pcsk9, coronary artery, atherosclerosis, coronary, stroke, cholesterol, artery, cardiovascular	Novel RNAi-Based Therapies for Atherosclerosis.
pops_plus	34137646	20210617	8	type 2 diabetes, cetp, lcat, pad, cholesterol, artery, triglycerides, diabetes	Disturbances of the transfer of cholesterol to high-density lipoprotein (HDL) in patients with peripheral artery disease with or without type 2 diabetes mellitus.
pops_plus	23110373	20121101	8	apob, lipid, atherosclerosis, triglyceride, hyperlipidemia, cholesterol, triglycerides, cardiovascular	Fasting remnant lipoproteins can predict postprandial hyperlipidemia.
pops_plus	23119086	20121103	8	apoe, cetp, lipid, pde3a, triglyceride, apoa1, cholesterol, triglycerides	Variants identified in a GWAS meta-analysis for blood lipids are associated with the lipid response to fenofibrate.
pops_plus	22786447	20120713	8	apob, lipid, atherosclerosis, coronary, cholesterol, artery, triglycerides, coronary artery	Thyroid function influences serum apolipoprotein B-48 levels in patients with thyroid disease.
pops_plus	22780915	20120712	8	coronary artery, atherosclerosis, triglyceride, coronary, ldlr, lipids, artery, actb	A novel multiplex polymerase chain reaction assay for profile analyses of gene expression in peripheral blood.
pops_plus	22783321	20120712	8	heart, apob, lipid, coronary heart, triglyceride, coronary, cholesterol, coronary artery	Coalition of DNA polymorphisms of ApoB and ApoAI genes is related with coronary artery disease in Kazaks.
pops_plus	25566792	20150109	8	lipid, triglyceride, lpl, lipids, cholesterol, cardiovascular, triglycerides, fatty acid	The -93T/G LPL Promoter Polymorphism Is Associated With Lower Third-Trimester Triglycerides in Pregnant African American Women.
pops_plus	17674965	20070807	8	type 2 diabetes, lipid, apom, coronary, coronary artery, cholesterol, artery, diabetes	A prospective evaluation of apolipoprotein M gene T-778C polymorphism in relation to coronary artery disease in Han Chinese.
pops_plus	30792163	20190223	8	cetp, sod1, atherosclerosis, triglyceride, lipids, abca1, cholesterol, cardiovascular	Therapeutic Intranasal Vaccine HB-ATV-8 Prevents Atherogenesis and Non-alcoholic Fatty Liver Disease in a Pig Model of Atherosclerosis.
pops_plus	11985047	20020503	8	lipid, atherosclerosis, triglyceride, abca1, hyperlipidemia, lpl, cholesterol, diabetes	[Disturbance of lipid metabolism].
pops_plus	31722970	20191115	8	acsl5, coronary artery, coronary, lipid, fatty acid, artery, cardiovascular, lipids	TNF-Œ± induces acyl-CoA synthetase 3 to promote lipid droplet formation in human endothelial cells.
pops_plus	31718266	20191114	8	heart, abcg5, abcg1, atherosclerosis, lcat, lipids, abca1, cholesterol	High-intensity interval training has a greater effect on reverse cholesterol transport elements compared with moderate-intensity continuous training in obese male rats.
pops_plus	31714636	20191113	8	pcsk9, apob, lipid, coronary, hmgcr, cholesterol, artery, coronary artery	Lipid lowering and Alzheimer disease risk: A mendelian randomization study.
pops_plus	31707849	20191112	8	heart, pcsk9, coronary heart, coronary, stroke, cholesterol, diabetes, cardiovascular	Predicting Benefit From Evolocumab Therapy in Patients With Atherosclerotic Disease Using a Genetic Risk Score: Results From the FOURIER Trial.
pops_plus	3330420	19870801	8	lipid, triglyceride, coronary, met, lipids, cholesterol, artery, coronary artery	Lipid transport through the plasma: the metabolic basis of hyperlipidaemia.
pops_plus	3608115	19870801	8	heart, apob, coronary heart, triglyceride, coronary, lipids, cholesterol, apoa1	Relation of parental history of early myocardial infarction to the level of apoprotein B in men.
pops_plus	27929184	20161209	8	lipid, acox1, triglyceride, fatty acid, hmgcr, cholesterol, fads1, triglycerides	A comparison of RS4-type resistant starch to RS2-type resistant starch in suppressing oxidative stress in high-fat-diet-induced obese rats.
pops_plus	27919350	20161207	8	pcsk9, lipid, coronary, coronary artery, cholesterol, artery, cardiovascular, diabetes	Identification and characterization of severe familial hypercholesterolemia in patients presenting for cardiac catheterization.
pops_plus	27919352	20161207	8	pcsk9, apob, lipid, coronary, cholesterol, artery, triglycerides, coronary artery	Impact of a 1-year lifestyle modification program on plasma lipoprotein and PCSK9 concentrations in patients with coronary artery disease.
pops_plus	27919364	20161207	8	pcsk9, apob, lipid, ldlr, lipids, cholesterol, dyslipidemias, cardiovascular	Double-heterozygous autosomal dominant hypercholesterolemia: Clinical characterization of an underreported disease.
pops_plus	24206759	20131112	8	cyp1a1, f2, lipid, pnpla3, lpl, cyp2c18, hmgcr, dhcr24	Identification and characterization of genes that control fat deposition in chickens.
pops_plus	20102947	20100128	8	lipid, atherosclerosis, coronary, met, cholesterol, artery, cardiovascular, coronary artery	Age-modification of lipoprotein, lipid, and lipoprotein ratio-associated risk for coronary artery calcium (from the Multi-Ethnic Study of Atherosclerosis [MESA]).
pops_plus	20105310	20100129	8	tgfb1, lipid, triglyceride, cd36, insr, lpl, fatty acid, fabp1	Association of adipocyte genes with ASP expression: a microarray analysis of subcutaneous and omental adipose tissue in morbidly obese subjects.
pops_plus	33900317	20210426	8	apoe, apob, lipid, acox1, triglyceride, ldlr, lpl, lipids	Purple grumixama anthocyanins (Eugenia brasiliensis Lam.) attenuate obesity and insulin resistance in high-fat diet mice.
pops_plus	33892925	20210424	8	type 2 diabetes, pcsk9, lipid, atherosclerosis, fatty acid, cholesterol, triglycerides, diabetes	Practical guidance for combination lipid-modifying therapy in high- and very-high-risk patients: A statement from a European Atherosclerosis Society Task Force.
pops_plus	28694924	20170712	8	heart, coronary artery, coronary, lipids, hmgcr, cholesterol, artery, cardiovascular	Statins redux: A re-assessment of how statins lower plasma cholesterol.
pops_plus	22220933	20120107	8	heart, apob, lipid, coronary heart, atherosclerosis, coronary, ldlr, scd	Sudden cardiac death in young adults: environmental risk factors and genetic aspects of premature atherosclerosis.
pops_plus	22222492	20120107	8	type 2 diabetes, lipid, gc, fatty acid, cholesterol, diabetes, triglycerides, lipids	Lower serum paraoxonase-1 activity is related to linoleic and docosahexanoic fatty acids in type 2 diabetic patients.
pops_plus	35145192	20220211	8	apoe, coronary artery, atherosclerosis, coronary, cholesterol, artery, park2, cardiovascular	Pitavastatin activates mitophagy to protect EPC proliferation through a calcium-dependent CAMK1-PINK1 pathway in atherosclerotic mice.
pops_plus	35141476	20220210	8	apoe, coronary artery, atherosclerosis, coronary, cholesterol, artery, vtn, cardiovascular	Systemic deficiency of vitronectin is associated with aortic inflammation and plaque progression in ApoE-Knockout mice.
pops_plus	35173767	20220217	8	lipid, ppara, triglyceride, elovl6, pparg, lpl, cholesterol, fads1	<i>C4BPA</i>: A Novel Co-Regulator of Immunity and Fat Metabolism in the Bovine Mammary Epithelial Cells.
pops_plus	35168914	20220216	8	heart, coronary artery, coronary heart, por, coronary, stroke, artery, cardiovascular	[Morning blood pressure surge in patients with recent ischaemic stroke: the neglected factor].
pops_plus	35156041	20220214	8	type 2 diabetes, coronary artery, slc2a2, coronary, foxo3, lipids, artery, diabetes	Evidence for Shared Genetic Aetiology Between Schizophrenia, Cardiometabolic, and Inflammation-Related Traits: Genetic Correlation and Colocalization Analyses.
pops_plus	23921086	20130808	8	heart, apoe, atherosclerosis, cd36, akt1, lipids, cholesterol, cardiovascular	Interference with akt signaling protects against myocardial infarction and death by limiting the consequences of oxidative stress.
pops_plus	28215318	20170221	8	lipid, atherosclerosis, coronary, ldlr, cholesterol, artery, cardiovascular, coronary artery	Dietary corn fractions reduce atherogenesis in low-density lipoprotein receptor knockout mice.
pops_plus	23913122	20130806	8	pcsk9, apob, lipid, triglyceride, mttp, cholesterol, dyslipidemias, cardiovascular	New therapies targeting apoB metabolism for high-risk patients with inherited dyslipidaemias: what can the clinician expect?
pops_plus	11073845	20001114	8	apob, lipid, coronary, cholesterol, artery, cardiovascular, triglycerides, coronary artery	Apolipoprotein concentrations during treatment and recurrent coronary artery disease events.
pops_plus	25901639	20150423	8	heart, apom, lipid, coronary heart, atherosclerosis, coronary, cholesterol, diabetes	Apolipoprotein M: Research progress, regulation and metabolic functions (Review).
pops_plus	25324324	20141018	8	heart, coronary artery, coronary, met, stroke, artery, diabetes, cardiovascular	Task shifting interventions for cardiovascular risk reduction in low-income and middle-income countries: a systematic review of randomised controlled trials.
pops_plus	16949489	20060905	8	heart, apob, lipid, coronary heart, coronary, lipids, cholesterol, triglycerides	Is plasma oxidized low-density lipoprotein, measured with the widely used antibody 4E6, an independent predictor of coronary heart disease among U.S. men and women?
pops_plus	12538880	20030123	8	apoe, apob, lipid, atherosclerosis, triglyceride, lipids, cholesterol, triglycerides	Deficiency of acyl CoA:cholesterol acyltransferase 2 prevents atherosclerosis in apolipoprotein E-deficient mice.
pops_plus	15863839	20050503	8	heart, apoe, apob, lipid, atherosclerosis, triglyceride, ldlr, cholesterol	Heterozygous mutation of ataxia-telangiectasia mutated gene aggravates hypercholesterolemia in apoE-deficient mice.
pops_plus	26178021	20150717	8	lipid, coronary, cd14, coronary artery, cholesterol, tf, artery, cardiovascular	High levels of TSP1+/CD142+ platelet-derived microparticles characterise young patients with high cardiovascular risk and subclinical atherosclerosis.
pops_plus	30323852	20181017	8	lipid, atherosclerosis, coronary, stroke, angptl4, cholesterol, artery, coronary artery	<i>ANGPTL4</i> variants and their haplotypes are associated with serum lipid levels, the risk of coronary artery disease and ischemic stroke and atorvastatin cholesterol-lowering responses.
pops_plus	16272615	20051108	8	heart, atherosclerosis, lcat, triglyceride, hyperlipidemia, lpl, cholesterol, diabetes	[Lipid metabolism and magnesium].
pops_plus	31186072	20190613	8	heart, coronary artery, triglyceride, coronary, pnpla2, fatty acid, artery, cardiovascular	Triglyceride deposit cardiomyovasculopathy: a rare cardiovascular disorder.
pops_plus	31182348	20190612	8	type 2 diabetes, apob, lipid, por, cholesterol, diabetes, apoa1, cardiovascular	ApoB/ApoA1 ratio and non-HDL-cholesterol/HDL-cholesterol ratio are associated to metabolic syndrome in patients with type 2 diabetes mellitus subjects and to ischemic cardiomyopathy in diabetic women.
pops_plus	21076630	20101116	8	type 2 diabetes, lipid, atherosclerosis, triglyceride, met, cholesterol, cardiovascular, diabetes	Achieving lipid targets in adults with type 2 diabetes: the Stop Atherosclerosis in Native Diabetics Study.
pops_plus	8674886	19960701	8	apob, lipid, triglyceride, coronary, coronary artery, cholesterol, artery, diabetes	Quantitative and qualitative derangement of apolipoprotein B-containing lipoproteins as a risk factor for diabetic macroangiopathy in nonobese NIDDM subjects.
pops_plus	8692021	19960701	8	cetp, lipid, atherosclerosis, triglyceride, lpl, cholesterol, triglycerides, cardiovascular	Effects of pancreas transplantation on distribution and composition of plasma lipoproteins.
pops_plus	23536941	20130329	8	heart, coronary heart, atherosclerosis, coronary, met, cholesterol, artery, triglycerides	[Relationship of subclinical atherosclerosis indicators to exercise tolerance in patients with coronary heart disease].
pops_plus	19241136	20090226	8	apoe, apob, lipid, triglyceride, hyperlipidemia, cholesterol, apoa1, cardiovascular	Genetic variation of apolipoprotein E does not contribute to the lipid abnormalities secondary to childhood minimal change nephrotic syndrome.
pops_plus	10582542	19991203	8	cetp, lipid, lcat, atherosclerosis, peripheral vascular, pltp, cholesterol, triglycerides	Net mass transfer of plasma cholesteryl esters and lipid transfer proteins in normolipidemic patients with peripheral vascular disease.
pops_plus	26820219	20160129	8	lipid, atherosclerosis, lcat, cd36, abca1, hmgcr, cholesterol, cyp7a1	Tanshinone IIA affects the HDL subfractions distribution not serum lipid levels: Involving in intake and efflux of cholesterol.
pops_plus	24330461	20131217	8	type 2 diabetes, coronary artery, coronary, cholesterol, artery, gata4, cardiovascular, diabetes	A study of the role of GATA4 polymorphism in cardiovascular metabolic disorders.
pops_plus	24334831	20131217	8	heart, pcsk9, atherosclerosis, triglyceride, bad, lipids, cholesterol, cardiovascular	Cholesterol: the good, the bad, and the ugly - therapeutic targets for the treatment of dyslipidemia.
pops_plus	28420707	20170420	8	heart, coronary artery, atherosclerosis, coronary, fabp4, fatty acid, artery, cardiovascular	Role of the fatty acid-binding protein 4 in heart failure and cardiovascular disease.
pops_plus	32127339	20200305	8	type 2 diabetes, apob, atherosclerosis, apoa1, lipids, cholesterol, triglycerides, diabetes	Association between lipids and apolipoproteins on type 2 diabetes risk; moderating effects of gender and polymorphisms; the ATTICA study.
pops_plus	30783475	20190221	8	heart, type 2 diabetes, lipid, triglyceride, cholesterol, diabetes, apoa1, cardiovascular	Candidate genes associated with the effect of rosiglitazone on glycemic control and cardiovascular system in the treatment of type 2 diabetes mellitus.
pops_plus	9082041	19970301	8	heart, apob, lipid, triglyceride, fatty acid, cholesterol, cetp, apoa1	Replacing dietary palmitic acid with elaidic acid (t-C18:1 delta9) depresses HDL and increases CETP activity in cebus monkeys.
pops_plus	18794388	20080917	8	apob, lipid, atherosclerosis, triglyceride, hyperlipidemia, ldlr, fatty acid, cholesterol	Inhibition of stearoyl-coenzyme A desaturase 1 dissociates insulin resistance and obesity from atherosclerosis.
pops_plus	11172484	20010215	8	apoe, apob, lipid, triglyceride, coronary, cholesterol, artery, coronary artery	Lipoprotein distribution of apolipoprotein C-III and its relationship to the presence in plasma of triglyceride-rich remnant lipoproteins.
pops_plus	11177312	20010215	8	heart, type 2 diabetes, coronary heart, coronary, met, stroke, diabetes, cardiovascular	Physical activity and risk for cardiovascular events in diabetic women.
pops_plus	33812382	20210404	8	pck2, lipid, scd, pparg, fabp4, lpl, fatty acid, apoa1	Identification of the molecular regulation of differences in lipid deposition in dedifferentiated preadipocytes from different chicken tissues.
pops_plus	33813326	20210404	8	lpin2, lipid, acox1, triglyceride, pparg, fabp4, lpl, fatty acid	Expression analysis of genes related to lipid metabolism in peripheral blood lymphocytes of chickens challenged with reticuloendotheliosis virus.
pops_plus	33823719	20210407	8	type 2 diabetes, pcsk9, lipid, triglyceride, cholesterol, cardiovascular, triglycerides, diabetes	Managing dyslipidemia in patients with Type 2 diabetes.
pops_plus	33799409	20210403	8	lipid, acox1, cyp27a1, fatty acid, hmgcr, cholesterol, triglycerides, lipids	Maternal and Postnatal High Linoleic Acid Diet Impacts Lipid Metabolism in Adult Rat Offspring in a Sex-Specific Manner.
pops_plus	33810957	20210403	8	heart, type 2 diabetes, apob, coronary heart, atherosclerosis, coronary, cholesterol, diabetes	LDL/apo B ratio predict coronary heart disease in Type 2 diabetes independent of ASCVD risk score: A case-cohort study.
pops_plus	33811891	20210403	8	kdm1a, apoe, lipid, atherosclerosis, triglyceride, srebf1, abca1, cholesterol	MicroRNA-325 facilitates atherosclerosis progression by mediating the SREBF1/LXR axis via KDM1A.
pops_plus	33798923	20210402	8	pcsk9, apob, lipid, atherosclerosis, pltp, lipids, cholesterol, triglycerides	Inducible phospholipid transfer protein deficiency ameliorates atherosclerosis.
pops_plus	27382320	20160707	8	apoe, triglyceride, fatty acid, cholesterol, fads1, artery, diabetes, cardiovascular	Fatty acid desaturase 1 knockout mice are lean with improved glycemic control and decreased development of atheromatous plaque.
pops_plus	27280970	20160610	8	heart, pcsk9, lipid, coronary heart, ldlr, coronary, stroke, cholesterol	Trafficking Dynamics of PCSK9-Induced LDLR Degradation: Focus on Human PCSK9 Mutations and C-Terminal Domain.
pops_plus	34286573	20210721	8	abcg1, lipid, cyp27a1, ldlr, hmgcr, cholesterol, cyp7a1, triglycerides	Novel Metabolic Regulation of Bile Acid Responses to Low Cholesterol in Whole-Grain-Diet-Fed Mice.
pops_plus	26253613	20150809	8	abcg1, cholesterol, pparg, ldlr, abca1, diabetes, triglycerides, cardiovascular	RAGE Suppresses ABCG1-Mediated Macrophage Cholesterol Efflux in Diabetes.
pops_plus	15321837	20040824	8	heart, pcsk9, apob, coronary heart, atherosclerosis, coronary, ldlr, cholesterol	Genetic causes of monogenic heterozygous familial hypercholesterolemia: a HuGE prevalence review.
pops_plus	26228670	20150801	8	heart, apob, lipid, coronary heart, coronary, cholesterol, diabetes, cardiovascular	Residual dyslipidemia according to low-density lipoprotein cholesterol, non-high-density lipoprotein cholesterol, and apolipoprotein B among statin-treated US adults: National Health and Nutrition Examination Survey 2009-2010.
pops_plus	16365197	20051221	8	abcg1, cetp, abcg5, atherosclerosis, ldlr, abca1, cholesterol, lipid	Pharmacological activation of liver X receptors promotes reverse cholesterol transport in vivo.
pops_plus	30976747	20190413	8	coronary artery, triglyceride, coronary, pnpla3, mttp, lipids, cholesterol, artery	Relationship Between Nonalcoholic Fatty Liver Disease Susceptibility Genes and Coronary Artery Disease.
pops_plus	15024932	20040318	8	heart, apob, lipid, atherosclerosis, triglyceride, cholesterol, diabetes, cardiovascular	[Lipid profile in patients with systemic lupus erythematosus, with special focus on lipoprotein(a) in lupus nephritis].
pops_plus	31953305	20200119	8	heart, lipid, coronary heart, abca1, triglyceride, coronary, lipids, cholesterol	Composition-function analysis of HDL subpopulations: influence of lipid composition on particle functionality.
pops_plus	31944172	20200117	8	lipid, rps6kb1, triglyceride, pparg, srebf1, fatty acid, ppara, actb	Metabolic effects of RUBCN/Rubicon deficiency in kidney proximal tubular epithelial cells.
pops_plus	31927390	20200114	8	heart, coronary artery, atherosclerosis, coronary, fabp4, lipids, artery, fatty acid	Relationships between visceral/subcutaneous adipose tissue FABP4 expression and coronary atherosclerosis in patients with metabolic syndrome.
pops_plus	31931806	20200115	8	apoe, apob, lipid, triglyceride, lipids, cholesterol, triglycerides, cardiovascular	Associations of Perfluoroalkyl substances with blood lipids and Apolipoproteins in lipoprotein subspecies: the POUNDS-lost study.
pops_plus	11860787	20020228	8	heart, apob, coronary heart, triglyceride, coronary, hyperlipidemia, cholesterol, diabetes	[The relationship between angiotensin converting enzyme gene polymorphism and risk factors for coronary heart disease].
pops_plus	24401215	20140110	8	lipid, atherosclerosis, cd36, ldlr, fatty acid, cholesterol, triglycerides, lipids	Curcumin modulation of high fat diet-induced atherosclerosis and steatohepatosis in LDL receptor deficient mice.
pops_plus	24401228	20140110	8	lipid, abca1, hyperlipidemia, lpl, lipids, hmgcr, cholesterol, cardiovascular	Simvastatin treatment upregulates intestinal lipid secretion pathways in a rodent model of the metabolic syndrome.
pops_plus	24402318	20140110	8	heart, cetp, lipid, coronary heart, triglyceride, coronary, lipids, cholesterol	Common variants of apolipoprotein E and cholesteryl ester transport protein genes in male patients with coronary heart disease and variable body mass index.
pops_plus	11257264	20010321	8	coronary artery, atherosclerosis, pon1, triglyceride, coronary, lipids, artery, lipid	A prospective study of paraoxonase gene Q/R192 polymorphism and severity, progression and regression of coronary atherosclerosis, plasma lipid levels, clinical events and response to fluvastatin.
pops_plus	28640111	20170623	8	heart, type 2 diabetes, coronary artery, coronary, ahr, artery, diabetes, cardiovascular	Comparative safety for cardiovascular outcomes of DPP-4 inhibitors versus glimepiride in patients with type 2 diabetes: A retrospective cohort study.
pops_plus	8018667	19940701	8	heart, cetp, lipid, coronary heart, lcat, coronary, cholesterol, triglycerides	Sex-specific effects of the glutamine/histidine polymorphism in apo A-IV on HDL metabolism.
pops_plus	23471235	20130309	8	heart, coronary artery, triglyceride, coronary, lpl, fatty acid, artery, diabetes	Endothelial heparanase regulates heart metabolism by stimulating lipoprotein lipase secretion from cardiomyocytes.
pops_plus	23466101	20130308	8	abcg1, type 2 diabetes, lipid, abca1, cd36, cholesterol, diabetes, cardiovascular	Adiponectin increases macrophages cholesterol efflux and suppresses foam cell formation in patients with type 2 diabetes mellitus.
pops_plus	27098076	20160422	8	heart, pcsk9, lipid, coronary heart, atherosclerosis, coronary, cholesterol, cardiovascular	[Severe hypercholesterolaemia--when to use the proprotein convertase subtilisin-kexin type 9 protease inhibitors (PCSK9 inhibitors)? Polish Society of Cardiology experts' group statement].
pops_plus	19191720	20090205	8	pcsk9, lipid, atherosclerosis, coronary, coronary artery, cholesterol, artery, diabetes	The PCSK9 gene E670G polymorphism affects low-density lipoprotein cholesterol levels but is not a risk factor for coronary artery disease in ethnic Chinese in Taiwan.
pops_plus	19188430	20090204	8	type 2 diabetes, apoe, lipid, triglyceride, lipids, cardiovascular, triglycerides, diabetes	Liver-specific loss of lipolysis-stimulated lipoprotein receptor triggers systemic hyperlipidemia in mice.
pops_plus	20041128	20091231	8	lipid, atherosclerosis, type ii diabetes, coronary, coronary artery, gc, artery, diabetes	Investigating the effects of statins on cellular lipid metabolism using a yeast expression system.
pops_plus	24376752	20131231	8	pck1, hyperlipidemia, pparg, srebf1, fatty acid, hmgcr, triglycerides, diabetes	COH-SR4 reduces body weight, improves glycemic control and prevents hepatic steatosis in high fat diet-induced obese mice.
pops_plus	33604704	20210219	8	pcsk9, apob, coronary artery, coronary, ldlr, lipids, artery, lipid	Translating genetic association of lipid levels for biological and clinical application.
pops_plus	33562440	20210210	8	heart, type 2 diabetes, lipid, coronary heart, abca1, coronary, cholesterol, diabetes	The Role of the ATP-Binding Cassette A1 (ABCA1) in Human Disease.
pops_plus	33563162	20210210	8	pcsk9, apob, coronary artery, coronary, ldlr, cholesterol, artery, cardiovascular	Familial Hypercholesterolemia: Update and Review.
pops_plus	33564908	20210210	8	coronary artery, peripheral vascular, coronary, met, stroke, artery, diabetes, cardiovascular	Intraoperative hypotension and perioperative acute ischemic stroke in patients having major elective non-cardiovascular non-neurological surgery.
pops_plus	33576385	20210212	8	lipid, atherosclerosis, hyperlipidemia, ldlr, cholesterol, cardiovascular, triglycerides, diabetes	Deficiency of inactive rhomboid protein 2 (iRhom2) attenuates diet-induced hyperlipidemia and early atherogenesis.
pops_plus	33579580	20210213	8	lipid, atherosclerosis, pon1, coronary, cardiovascular, artery, diabetes, coronary artery	Improved risk assessment of coronary artery disease by substituting paraoxonase 1 activity for HDL-C: Novel cardiometabolic biomarkers based on HDL functionality.
pops_plus	33581713	20210214	8	type 2 diabetes, pcsk9, coronary artery, coronary, cholesterol, artery, cardiovascular, diabetes	The predictive utility of circulating PCSK9 levels on diabetes mellitus.
pops_plus	33589218	20210216	8	heart, pcsk9, lipid, atherosclerosis, cholesterol, diabetes, dyslipidemias, cardiovascular	Similarities and differences between European and American guidelines on the management of blood lipids to reduce cardiovascular risk.
pops_plus	33590792	20210216	8	lipa, lipid, atherosclerosis, vim, pnpla2, cholesterol, apoa1, bcl2	Identification of novel lipid droplet factors that regulate lipophagy and cholesterol efflux in macrophage foam cells.
pops_plus	29994840	20180712	8	pcsk9, lipid, atherosclerosis, cd36, abca1, ldlr, cholesterol, cardiovascular	Pleiotropic effects of proprotein convertase subtilisin/kexin type 9 inhibitors?
pops_plus	30008986	20180717	8	heart, lipid, abca1, cd36, gc, fatty acid, cholesterol, cardiovascular	High Cholesterol Diet-Induced Changes in Oxysterol and Scavenger Receptor Levels in Heart Tissue.
pops_plus	32209332	20200327	8	type 2 diabetes, coronary artery, coronary, stroke, gc, artery, diabetes, cardiovascular	Interleukin-18 promoter -137 G/C polymorphism (rs187238) is associated with biochemical markers of renal function and cardiovascular disease in type 2 diabetes patients.
pops_plus	16439690	20060128	8	cyp7a1, lipid, atherosclerosis, coronary, cholesterol, artery, cardiovascular, coronary artery	Elevated homocysteine reduces apolipoprotein A-I expression in hyperhomocysteinemic mice and in males with coronary artery disease.
pops_plus	16015283	20050715	8	heart, apoe, apob, lipid, coronary heart, coronary, ldlr, cholesterol	Meta-analysis of four new genome scans for lipid parameters and analysis of positional candidates in positive linkage regions.
pops_plus	16890925	20060808	8	heart, cetp, lipid, coronary heart, atherosclerosis, triglyceride, coronary, cholesterol	Common variants of Cholesteryl ester transfer protein gene and their association with lipid parameters in healthy volunteers of Tamilian population.
pops_plus	30704580	20190202	8	heart, cetp, lipid, coronary heart, coronary, cholesterol, triglycerides, cardiovascular	Cholesteryl Ester Transfer¬†Protein Inhibition for Preventing Cardiovascular¬†Events: JACC Review Topic of the Week.
pops_plus	30706799	20190202	8	heart, pcsk9, lipid, coronary heart, coronary, cholesterol, dyslipidemias, cardiovascular	Current Drugs and Nutraceuticals for the Treatment of Patients with Dyslipidemias.
pops_plus	30721842	20190206	8	lipid, atherosclerosis, triglyceride, coronary, ldlr, coronary artery, artery, diabetes	Gpihbp1 deficiency accelerates atherosclerosis and plaque instability in diabetic Ldlr<sup>-/-</sup> mice.
pops_plus	11730829	20011204	8	apoe, apob, lipid, triglyceride, hyperlipidemia, lipids, cholesterol, triglycerides	Lipoprotein and apolipoprotein abnormalities in familial combined hyperlipidemia: a 20-year prospective study.
pops_plus	8864946	19960801	8	apob, coronary artery, atherosclerosis, coronary, cholesterol, artery, triglycerides, diabetes	Sialic acids and the metabolism of low density lipoprotein.
pops_plus	7555484	19950301	8	lipid, coronary, met, coronary artery, cholesterol, artery, triglycerides, diabetes	Treatment of hypercholesterolemia in NIDDM with policosanol.
pops_plus	32979922	20200927	8	heart, coronary heart, coronary, met, stroke, pad, diabetes, cardiovascular	Diabetes as a risk factor for incident peripheral arterial disease in women compared to men: a systematic review and meta-analysis.
pops_plus	16874146	20060729	8	heart, coronary heart, coronary, met, stroke, cholesterol, diabetes, cardiovascular	Favorable cardiovascular risk profile and 10-year coronary heart disease incidence in women and men: results from the Progetto CUORE.
pops_plus	10466375	19990831	8	heart, apoe, apob, lipid, coronary heart, coronary, cetp, cardiovascular	[The genetic contribution to coronary disease. The genetic factors related to lipid metabolism].
pops_plus	10067265	19990306	8	heart, coronary heart, atherosclerosis, lcat, coronary, stroke, lpl, diabetes	Genetics and metabolism of lipoprotein(a) and their clinical implications (Part 1).
pops_plus	10063993	19990304	8	heart, apob, coronary artery, coronary heart, coronary, lipid, artery, cardiovascular	The factor II G20210A and factor V G1691A gene transitions and coronary heart disease.
pops_plus	11804197	20020124	8	cetp, lipid, atherosclerosis, triglyceride, coronary, cholesterol, artery, coronary artery	Genetic variations of cholesterol ester transfer protein gene in Koreans.
pops_plus	2614256	19891001	8	apob, coronary artery, atherosclerosis, triglyceride, coronary, fatty acid, cholesterol, artery	Fish oil decreases hepatic cholesteryl ester secretion but not apoB secretion in African green monkeys.
pops_plus	2615161	19891001	8	heart, apob, lipid, coronary heart, coronary, lipids, cholesterol, triglycerides	[Changes in the levels and composition of lipoproteins and apolipoproteins of blood plasma in patients with ischemic heart disease after hemosorption].
pops_plus	12847564	20030709	8	lipid, atherosclerosis, triglyceride, coronary, lpl, cholesterol, triglycerides, cardiovascular	Lipoprotein lipase activator NO-1886.
pops_plus	26289083	20150821	8	coronary artery, coronary, met, stroke, pad, artery, diabetes, cardiovascular	High-Risk Atherosclerotic Cardiovascular Disease in a Real-World Employed Japanese Population: Prevalence, Cardiovascular Event Rates, and Costs.
pops_plus	26315403	20150829	8	heart, lipid, abcg1, abca1, cyp27a1, lipids, cholesterol, cardiovascular	Impairment of Macrophage Cholesterol Efflux by Cholesterol Hydroperoxide Trafficking: Implications for Atherogenesis Under Oxidative Stress.
pops_plus	29725814	20180505	8	lipid, hyperlipidemia, npc1, srebf1, fatty acid, cholesterol, triglycerides, lipids	Inhibition of miR-486 and miR-92a decreases liver and plasma cholesterol levels by modulating lipid-related genes in hyperlipidemic hamsters.
pops_plus	29728915	20180506	8	type 2 diabetes, apoe, cetp, coronary artery, coronary, artery, diabetes, cardiovascular	Results, meta-analysis and a first evaluation of U<sub>NOx</sub>R, the urinary nitrate-to-nitrite molar ratio, as a measure of nitrite reabsorption in experimental and clinical settings.
pops_plus	29739101	20180509	8	type 2 diabetes, lipid, atherosclerosis, triglyceride, cd36, fatty acid, cardiovascular, diabetes	STAT1 and STAT6 Act as Antagonistic Regulators of PPARŒ≥ in Diabetic Patients with and without Cardiovascular Diseases.
pops_plus	17639305	20070720	8	type 2 diabetes, lipid, coronary, coronary artery, rbp4, cholesterol, artery, diabetes	Retinol-binding protein 4 is associated with components of the metabolic syndrome, but not with insulin resistance, in men with type 2 diabetes or coronary artery disease.
pops_plus	24084154	20131003	8	heart, lipid, coronary heart, abca1, coronary, lipids, cholesterol, triglycerides	Gender specific association of ABCA1 gene R219K variant in coronary disease risk through interactions with serum triglyceride elevation in Turkish adults.
pops_plus	20963947	20101023	8	apob, lipid, atherosclerosis, triglyceride, coronary, cholesterol, artery, coronary artery	[Clinical significance of apolipoprotein B-48 (apoB-48) in chronic kidney disease patients].
pops_plus	16102772	20050817	8	apoe, atherosclerosis, hyperlipidemia, ldlr, pad, fatty acid, cholesterol, triglycerides	Plasma insulin levels predict atherosclerotic lesion burden in obese hyperlipidemic mice.
pops_plus	30381009	20181102	8	heart, lipid, hyperlipidemia, met, lipids, cholesterol, triglycerides, cardiovascular	Effects of Canola Oil Consumption on Lipid Profile: A Systematic Review and Meta-Analysis of Randomized Controlled Clinical Trials.
pops_plus	11809774	20020126	8	heart, f2, apoe, coronary heart, atherosclerosis, lcat, coronary, cholesterol	Oxidative stress is markedly elevated in lecithin:cholesterol acyltransferase-deficient mice and is paradoxically reversed in the apolipoprotein E knockout background in association with a reduction in atherosclerosis.
pops_plus	20424363	20100429	8	coronary artery, triglyceride, coronary, hyperlipidemia, cholesterol, artery, kit, diabetes	Fasting adiponectin is inversely correlated with metabolic syndrome in patients with coronary artery disease.
pops_plus	11680797	20011030	8	heart, lipid, coronary heart, triglyceride, coronary, lpl, artery, coronary artery	Association of lipoprotein lipase Ser447Ter polymorphism with brain infarction: a population-based neuropathological study.
pops_plus	10383084	19990626	8	apoe, apob, lipid, coronary, coronary artery, cholesterol, artery, cardiovascular	Apolipoprotein E genotype and plasma levels in coronary artery disease. A case-control study in the Italian population.
pops_plus	8241092	19931201	8	apoe, apob, coronary artery, triglyceride, coronary, hyperlipidemia, cholesterol, artery	Familial hypoalphalipoproteinemia in premature coronary artery disease.
pops_plus	11160361	20010213	8	apob, lipid, atherosclerosis, triglyceride, lipids, cholesterol, artery, triglycerides	Remnant lipoproteins are related to intima-media thickness of the carotid artery independently of LDL cholesterol and plasma triglycerides.
pops_plus	11164428	20010213	8	coronary artery, atherosclerosis, triglyceride, coronary, lpl, cholesterol, artery, diabetes	Preheparin serum lipoprotein lipase mass is negatively related to coronary atherosclerosis.
pops_plus	11168785	20010213	8	heart, apob, atherosclerosis, apoa1, cholesterol, artery, triglycerides, cardiovascular	Insulin resistance and intima-media thickness in the carotid and femoral arteries of clinically healthy 58-year-old men. The Atherosclerosis and Insulin Resistance Study (AIR).
pops_plus	30241732	20180923	8	apoe, abcg5, coronary, ldlr, coronary artery, cholesterol, artery, lipid	Oligogenic familial hypercholesterolemia, LDL cholesterol, and coronary artery disease.
pops_plus	28948955	20170927	8	cetp, lipid, atherosclerosis, lpl, lipids, cholesterol, triglycerides, cardiovascular	Factors affecting high-density lipoprotein cholesterol in HIV-infected patients on nevirapine-based antiretroviral therapy.
pops_plus	18609305	20080709	8	apoe, lipid, atherosclerosis, lipids, cholesterol, artery, triglycerides, cardiovascular	Effects of social isolation and environmental enrichment on atherosclerosis in ApoE-/- mice.
pops_plus	18596051	20080704	8	apoe, mlxipl, triglyceride, lpl, angptl3, trib1, galnt2, diabetes	Polygenic determinants of severe hypertriglyceridemia.
pops_plus	9888873	19990115	8	heart, coronary heart, triglyceride, coronary, met, lpl, lipids, triglycerides	Developmental and pharmacological regulation of apolipoprotein C-II gene expression. Comparison with apo C-I and apo C-III gene regulation.
pops_plus	34636650	20211012	8	coronary artery, arnt, atherosclerosis, coronary, ahr, met, fatty acid, artery	Interferon-Œ≥ Impairs Human Coronary Artery Endothelial Glucose Metabolism by Tryptophan Catabolism and Activates Fatty Acid Oxidation.
pops_plus	34652028	20211015	8	pcsk9, apob, lipid, coronary, ldlr, cholesterol, artery, coronary artery	LDL-cholesterol and PCSK9 in patients with familial hypercholesterolemia: influence of PCSK9 variants under lipid-lowering therapy.
pops_plus	34660746	20211018	8	abcg1, pcsk9, lipid, atherosclerosis, ldlr, apoe, abca1, cholesterol	Role of PCSK9 in Homocysteine-Accelerated Lipid Accumulation in Macrophages and Atherosclerosis in ApoE<sup>-/-</sup> Mice.
pops_plus	17594534	20070628	8	heart, apoe, lipid, coronary heart, atherosclerosis, coronary, stroke, cardiovascular	Apolipoprotein E polymorphism in Southern Iran: E4 allele in the lowest reported amounts.
pops_plus	19556727	20090627	8	lipid, scd, triglyceride, lipids, cholesterol, cyp7a1, triglycerides, fatty acid	Interaction of fenofibrate and fish oil in relation to lipid metabolism in mice.
pops_plus	16316964	20051201	8	heart, apob, lipid, coronary heart, coronary, cholesterol, triglycerides, cardiovascular	Non-high-density lipoprotein cholesterol and apolipoprotein B in the prediction of coronary heart disease in men.
pops_plus	17076584	20061102	8	lipid, atherosclerosis, coronary, lipids, cholesterol, artery, abca1, coronary artery	Human immunodeficiency virus impairs reverse cholesterol transport from macrophages.
pops_plus	16581344	20060404	8	coronary artery, triglyceride, coronary, lpl, fatty acid, tf, artery, triglycerides	Impact of native VLDL on tissue factor pathway inhibitor in endothelial cells and interactions between TFPI and lipoprotein lipase.
pops_plus	28336556	20170325	8	heart, apob, lipid, atherosclerosis, hyperlipidemia, fatty acid, hmgcr, cholesterol	Human MicroRNA-548p Decreases Hepatic Apolipoprotein B Secretion and Lipid Synthesis.
pops_plus	28336922	20170325	8	pcsk9, apob, lipid, coronary, apoa1, lipids, cholesterol, triglycerides	Novel and traditional lipid-related biomarkers and their combinations in predicting coronary severity.
pops_plus	28337713	20170325	8	type 2 diabetes, pcsk9, lipid, triglyceride, fatty acid, cholesterol, triglycerides, diabetes	The Potential Role of Fibroblast Growth Factor 21 in Lipid Metabolism and Hypertension.
pops_plus	28334899	20170324	8	ncoa2, bptf, lipid, nid2, lipids, cholesterol, fgfr2, triglycerides	Association analyses of East Asian individuals and trans-ancestry analyses with European individuals reveal new loci associated with cholesterol and triglyceride levels.
pops_plus	28325524	20170323	8	pcsk9, lipid, coronary, stroke, coronary artery, cholesterol, artery, cardiovascular	Current status of lipid management in acute coronary syndrome.
pops_plus	28347514	20170329	8	heart, lipid, coronary heart, coronary, met, stroke, diabetes, cardiovascular	Use of Lipid-modifying Therapy and LDL-C Goal Attainment in a High-Cardiovascular-Risk Population in the Netherlands.
pops_plus	28928671	20170921	8	lipid, atherosclerosis, prkaa2, cd36, abca1, cyp27a1, lipids, cholesterol	Aerobic Exercise Training Selectively Changes Oxysterol Levels and Metabolism Reducing Cholesterol Accumulation in the Aorta of Dyslipidemic Mice.
pops_plus	34450192	20210827	8	coronary artery, coronary, met, stroke, artery, diabetes, triglycerides, cardiovascular	Generalizability of the REDUCE-IT trial and cardiovascular outcomes associated with hypertriglyceridemia among patients potentially eligible for icosapent ethyl therapy: An analysis of the REduction of Atherothrombosis for Continued Health (REACH) registry.
pops_plus	34436591	20210826	8	apoe, lipid, ppara, rxra, ldlr, srebf1, fatty acid, cholesterol	Sirtuin 1 is involved in oleic acid-induced calf hepatocyte steatosis via alterations in lipid metabolism-related proteins.
pops_plus	32900520	20200909	8	heart, cetp, coronary heart, cholesterol, coronary, fatty acid, abca1, apoa1	Dietary stearic acid and palmitic acid do not differently affect ABCA1-mediated cholesterol efflux capacity in healthy men and postmenopausal women: A randomized controlled trial.
pops_plus	32878717	20200904	8	type 2 diabetes, lipid, met, pad, cholesterol, artery, diabetes, cardiovascular	Type 2 diabetes mellitus is a strong predictor of LDL cholesterol target achievement in patients with peripheral artery disease.
pops_plus	10094104	19990327	8	heart, apob, coronary heart, triglyceride, coronary, lipids, cholesterol, triglycerides	Differences in postprandial concentrations of very-low-density lipoprotein and chylomicron remnants between normotriglyceridemic and hypertriglyceridemic men with and without coronary heart disease.
pops_plus	12226554	20020913	8	heart, coronary heart, atherosclerosis, pon1, coronary, met, cholesterol, cardiovascular	Serum paraoxonase (PON1) concentration in patients undergoing hemodialysis.
pops_plus	12227720	20020914	8	heart, f2, lipid, coronary heart, atherosclerosis, coronary, fatty acid, cardiovascular	Oxidative stress in chronic renal failure as a cardiovascular risk factor.
pops_plus	25968885	20150514	8	type 2 diabetes, coronary artery, coronary, ahr, stroke, artery, diabetes, cardiovascular	On-pump versus off-pump coronary artery bypass graft surgery among patients with type 2 diabetes in the Bypass Angioplasty Revascularization Investigation 2 Diabetes trial.
pops_plus	25965722	20150513	8	pcsk9, apob, lipid, ldlr, cholesterol, artery, ldlrap1, cardiovascular	The effect of an apolipoprotein A-I-containing high-density lipoprotein-mimetic particle (CER-001) on carotid artery wall thickness in patients with homozygous familial hypercholesterolemia: The Modifying Orphan Disease Evaluation (MODE) study.
pops_plus	24643644	20140320	8	arntl, apoe, hnf4a, rps6kb1, cd36, lepr, hnf1a, cardiovascular	Large multiethnic Candidate Gene Study for C-reactive protein levels: identification of a novel association at CD36 in African Americans.
pops_plus	20578904	20100629	8	cetp, lipid, coronary, hmgcr, cholesterol, artery, cyp7a1, coronary artery	Common variants of HMGCR, CETP, APOAI, ABCB1, CYP3A4, and CYP7A1 genes as predictors of lipid-lowering response to atorvastatin therapy.
pops_plus	24663808	20140326	8	type 2 diabetes, coronary artery, atherosclerosis, coronary, gc, artery, cardiovascular, diabetes	A serum 25-hydroxyvitamin D concentration-associated genetic variant in DHCR7 interacts with type 2 diabetes status to influence subclinical atherosclerosis (measured by carotid intima-media thickness).
pops_plus	17608096	20070705	8	coronary artery, atherosclerosis, ppara, abca1, gc, lipids, cholesterol, cardiovascular	Synergistic effect between polymorphisms of PPARA and ABCA1 genes on the premature coronary artery disease.
pops_plus	17601381	20070703	8	heart, coronary heart, atherosclerosis, coronary, met, stroke, cholesterol, cardiovascular	von Willebrand Factor in CHD and stroke: relationships and therapeutic implications.
pops_plus	22152955	20111214	8	heart, type 2 diabetes, pcsk9, coronary heart, coronary, hnf1a, sort1, diabetes	Genetic susceptibility to coronary heart disease in type 2 diabetes: 3 independent studies.
pops_plus	22156303	20111214	8	lipid, atherosclerosis, type ii diabetes, abca1, fatty acid, cholesterol, cardiovascular, diabetes	MicroRNAs in metabolism and metabolic diseases.
pops_plus	29274325	20171224	8	heart, cetp, lipid, pltp, lipids, cholesterol, artery, triglycerides	HDL acceptor capacities for cholesterol efflux from macrophages and lipid transfer are both acutely reduced after myocardial infarction.
pops_plus	28131807	20170130	8	coronary artery, atherosclerosis, por, coronary, cholesterol, artery, cardiovascular, diabetes	[Prevalence and extent of coronary artery calcification in an asymptomatic cardiovascular Mexican population: Genetics of Atherosclerotic Disease study].
pops_plus	30468910	20181124	8	lipc, apob, cholesterol, abca1, cetp, wwox, galnt2, cardiovascular	Generalizability and applicability of results obtained from populations of European descent regarding the effect direction and size of HDL-C level-associated genetic variants to the Hungarian general and Roma populations.
pops_plus	18782872	20080911	8	type 2 diabetes, atherosclerosis, lcat, lipids, cholesterol, artery, triglycerides, diabetes	Plasma lecithin: cholesterol acyltransferase activity is elevated in metabolic syndrome and is an independent marker of increased carotid artery intima media thickness.
pops_plus	18787185	20080913	8	abcg1, atherosclerosis, apoa1, lipids, abca1, artery, cholesterol, triglycerides	Effect of macrophage overexpression of murine liver X receptor-alpha (LXR-alpha) on atherosclerosis in LDL-receptor deficient mice.
pops_plus	18787507	20080913	8	cetp, lipid, ppara, coronary, hmgcr, cholesterol, artery, coronary artery	Pharmacological effects of lipid-lowering drugs recapitulate with a larger amplitude the phenotypic effects of common variants within their target genes.
pops_plus	8548414	19960101	8	apoe, apob, lipid, lcat, coronary, hyperlipidemia, cholesterol, triglycerides	Effects of simvastatin on plasma lipids and apolipoproteins in familial hypercholesterolemic swine.
pops_plus	9044304	19960101	8	apob, lipid, atherosclerosis, coronary, coronary artery, cholesterol, artery, diabetes	The role of advanced glycosylation end-products in the pathogenesis of atherosclerosis.
pops_plus	8904267	19960101	8	heart, lipid, triglyceride, hyperlipidemia, lpl, lipids, cholesterol, triglycerides	Effects of heparin and low molecular weight heparin on lipid transport during parenteral feeding in the rat.
pops_plus	20374257	20100409	8	abcg1, lipid, abca1, coronary, lipids, cholesterol, artery, coronary artery	Rate-limiting factors of cholesterol efflux in reverse cholesterol transport: acceptors and donors.
pops_plus	21252727	20110122	8	coronary artery, triglyceride, coronary, lpl, lipids, cholesterol, artery, cardiovascular	Contribution of adiponectin to the cardiometabolic risk of postmenopausal women with loss-of-function lipoprotein lipase gene mutations.
pops_plus	19910222	20091114	8	heart, lipid, coronary, met, coronary artery, artery, diabetes, cardiovascular	A systematic review of implementation of established recommended secondary prevention measures in patients with PAOD.
pops_plus	9407433	19980104	8	apoe, apob, lipid, atherosclerosis, triglyceride, hyperlipidemia, cholesterol, triglycerides	Progression of renal failure: role of apolipoprotein B-containing lipoproteins.
pops_plus	23631910	20130502	8	coronary artery, atherosclerosis, coronary, stroke, tf, artery, diabetes, cardiovascular	The role of tissue factor pathway inhibitor in atherosclerosis and arterial thrombosis.
pops_plus	19501926	20090609	8	apob, coronary artery, atherosclerosis, triglyceride, coronary, cholesterol, artery, diabetes	The comparison of coronary angiographic profiles between diabetic and nondiabetic patients with coronary artery disease in a Chinese population.
pops_plus	9526808	19980404	8	apob, coronary artery, atherosclerosis, triglyceride, coronary, cholesterol, artery, cardiovascular	Atherogenicity of triglyceride-rich lipoproteins.
pops_plus	9526813	19980404	8	apob, lipid, coronary, hyperlipidemia, cholesterol, artery, triglycerides, coronary artery	Role of 3-hydroxy-3-methylglutaryl coenzyme A reductase inhibitors ("statins") in familial combined hyperlipidemia.
pops_plus	16635593	20060426	8	coronary artery, coronary, hyperlipidemia, met, cholesterol, artery, triglycerides, diabetes	Comparison of coronary risk factors and quality of life in coronary artery disease patients with versus without diabetes mellitus.
pops_plus	28267856	20170308	8	lipid, triglyceride, coronary, lpl, lipids, artery, triglycerides, coronary artery	Association of Rare and Common Variation in the Lipoprotein Lipase Gene With Coronary Artery Disease.
pops_plus	16631444	20060425	8	apoe, lipid, atherosclerosis, coronary, cholesterol, artery, triglycerides, coronary artery	Accumulation of apoE-enriched triglyceride-rich lipoproteins in patients with coronary artery disease.
pops_plus	16639078	20060428	8	lipid, atherosclerosis, coronary, ldlr, cholesterol, artery, triglycerides, coronary artery	Transgenic mice express human MPO -463G/A alleles at atherosclerotic lesions, developing hyperlipidemia and obesity in -463G males.
pops_plus	16644340	20060429	8	heart, coronary artery, coronary, met, cholesterol, artery, diabetes, cardiovascular	Increased cardiovascular risk associated with diabetes in Dallas County.
pops_plus	16644710	20060429	8	heart, type 2 diabetes, apoe, lipid, coronary heart, coronary, pltp, diabetes	Plasma phospholipid transfer protein activity is decreased in type 2 diabetes during treatment with atorvastatin: a role for apolipoprotein E?
pops_plus	34361033	20210807	8	heart, apoe, lipid, coronary heart, triglyceride, coronary, hyperlipidemia, cholesterol	Features of Lipid Metabolism in Humanized ApoE Knockin Rat Models.
pops_plus	2259550	19901201	8	lipid, atherosclerosis, lcat, triglyceride, hyperlipidemia, lpl, lipids, cholesterol	Diagnosis and management of familial dyslipoproteinemia in children and adolescents.
pops_plus	12469903	20021210	8	lipid, atherosclerosis, lcat, triglyceride, pltp, lipids, cholesterol, triglycerides	Effect of acute Chlamydia pneumoniae infection on lipoprotein metabolism in NIH/S mice.
pops_plus	26561616	20151113	8	type 2 diabetes, apob, met, lipids, cholesterol, diabetes, triglycerides, cardiovascular	Effects of tree nuts on blood lipids, apolipoproteins, and blood pressure: systematic review, meta-analysis, and dose-response of 61 controlled intervention trials.
pops_plus	25333200	20141022	8	heart, apoe, lipid, coronary heart, triglyceride, coronary, fatty acid, cholesterol	Fatty acid metabolism in carriers of apolipoprotein E epsilon 4 allele: is it contributing to higher risk of cognitive decline and coronary heart disease?
pops_plus	20144596	20100211	8	heart, pcsk9, apob, coronary heart, coronary, ldlr, lipids, cholesterol	Moderate phenotypic expression of familial hypercholesterolemia in Tunisia.
pops_plus	20150529	20100213	8	lipid, coronary, lpl, lipids, cholesterol, artery, triglycerides, coronary artery	Associations of lipoprotein lipase gene polymorphisms with longitudinal plasma lipid trends in young adults: The Coronary Artery Risk Development in Young Adults (CARDIA) study.
pops_plus	29555209	20180321	8	lipid, triglyceride, coronary, lpl, angptl4, artery, triglycerides, coronary artery	Regulation of angiopoietin-like 4 and lipoprotein lipase in human adipose tissue.
pops_plus	31362743	20190801	8	heart, coronary artery, type ii diabetes, coronary, ahr, artery, diabetes, cardiovascular	Effect of metformin on all-cause and cardiovascular mortality in patients with coronary artery diseases: a systematic review and an updated meta-analysis.
pops_plus	31377187	20190805	8	type 2 diabetes, coronary artery, atherosclerosis, coronary, pnpla3, artery, cardiovascular, diabetes	PNPLA3 gene polymorphism in Brazilian patients with type 2 diabetes: A prognostic marker beyond liver disease?
pops_plus	31386828	20190807	8	lrp1, lipid, cholesterol, triglyceride, apoe, lipids, abca1, triglycerides	A neutral lipid-enriched diet improves myelination and alleviates peripheral nerve pathology in neuropathic mice.
pops_plus	28867683	20170905	8	apoe, lipid, atherosclerosis, stroke, lpl, cholesterol, angptl4, cardiovascular	MicroRNA-134 Promotes the Development of Atherosclerosis Via the ANGPTL4/LPL Pathway in Apolipoprotein E Knockout Mice.
pops_plus	28867878	20170905	8	heart, type 2 diabetes, coronary heart, coronary, met, stroke, diabetes, cardiovascular	Childhood Maltreatment and Health Impact: The Examples of Cardiovascular Disease and Type 2 Diabetes Mellitus in Adults.
pops_plus	27791990	20161030	8	heart, cetp, lipid, coronary heart, atherosclerosis, coronary, cholesterol, triglycerides	A meta-analytic evaluation of cholesteryl ester transfer protein (CETP) C-629A polymorphism in association with coronary heart disease risk and lipid changes.
pops_plus	28865848	20170904	8	pck1, scd, hp, acox1, elovl6, mttp, fatty acid, nfkb1	Grain challenge affects systemic and hepatic molecular biomarkers of inflammation, stress, and metabolic responses to a greater extent in Holstein than Jersey cows.
pops_plus	28864143	20170903	8	lipids, apob, lipid, apoa1, fatty acid, cholesterol, triglycerides, cardiovascular	Association of dietary nutrients with blood lipids and blood pressure in 18 countries: a cross-sectional analysis from the PURE study.
pops_plus	28862752	20170902	8	heart, coronary heart, coronary, stroke, scd, cholesterol, diabetes, cardiovascular	Thyroid-stimulating hormone and risk of sudden cardiac death, total mortality and cardiovascular morbidity.
pops_plus	28863273	20170902	8	abcg1, apoe, abcg5, atherosclerosis, triglyceride, abca1, cholesterol, cyp7a1	2,3,4',5-tetrahydroxystilbene-2-O-Œ≤-d-glycoside attenuates atherosclerosis in apolipoprotein‚ÄâE-deficient mice: role of reverse cholesterol transport.
pops_plus	28858301	20170901	8	heart, coronary artery, coronary heart, atherosclerosis, aldh2, coronary, artery, cardiovascular	Activation of aldehyde dehydrogenase 2 slows down the progression of atherosclerosis via attenuation of ER stress and apoptosis in smooth muscle cells.
pops_plus	23836449	20130710	8	abcg1, apoe, lipid, atherosclerosis, triglyceride, cd36, abca1, cholesterol	Excess nitric oxide impairs LXR(Œ±)-ABCA1-dependent cholesterol efflux in macrophage foam cells.
pops_plus	23852762	20130716	8	type 2 diabetes, coronary artery, atherosclerosis, coronary, met, artery, cardiovascular, diabetes	Cardiovascular risk stratification in rheumatic diseases: carotid ultrasound is more sensitive than Coronary Artery Calcification Score to detect subclinical atherosclerosis in patients with rheumatoid arthritis.
pops_plus	11039962	20001020	8	heart, lipid, coronary heart, peripheral vascular, coronary, hyperlipidemia, met, cardiovascular	Use of lipid lowering drugs for primary prevention of coronary heart disease: meta-analysis of randomised trials.
pops_plus	26374825	20150917	8	pcsk9, lipid, coronary, ldlr, coronary artery, cholesterol, artery, cardiovascular	Characterization of Autosomal Dominant Hypercholesterolemia Caused by PCSK9 Gain of Function Mutations and Its Specific Treatment With Alirocumab, a PCSK9 Monoclonal Antibody.
pops_plus	26375028	20150917	8	apoe, lipid, mlxipl, triglyceride, hmgcr, cholesterol, sort1, mafb	Genetic Contribution of Variants near SORT1 and APOE on LDL Cholesterol Independent of Obesity in Children.
pops_plus	23259564	20121225	8	coronary artery, atherosclerosis, coronary, cholesterol, artery, cardiovascular, apoa1, diabetes	High density lipoprotein - should we raise it?
pops_plus	23262498	20121225	8	lipc, apob, cholesterol, triglyceride, lipids, abca1, cetp, triglycerides	Impact of genetic factors on dyslipidemia in HIV-infected patients starting antiretroviral therapy.
pops_plus	16784973	20060621	8	apoe, apob, lipid, atherosclerosis, triglyceride, lipids, cholesterol, cardiovascular	Altered lipid, apolipoprotein, and lipoprotein profiles in inflammatory bowel disease: consequences on the cholesterol efflux capacity of serum using Fu5AH cell system.
pops_plus	11570211	20010926	8	heart, lipid, coronary heart, peripheral vascular, coronary, bad, cholesterol, cardiovascular	[Lipiwatch: a study of the treatment of dyslipidemias in Luxembourg].
pops_plus	9678774	19980725	8	coronary artery, triglyceride, coronary, hyperlipidemia, lpl, cholesterol, artery, triglycerides	Gender-related association between the -93T--&gt;G/D9N haplotype of the lipoprotein lipase gene and elevated lipid levels in familial combined hyperlipidemia.
pops_plus	31829184	20191213	8	lipid, atherosclerosis, coronary, cholesterol, artery, cardiovascular, apoa1, coronary artery	Complement C3 gene polymorphisms are associated with lipid levels, but not the risk of coronary artery disease: a case-control study.
pops_plus	31830648	20191213	8	heart, apoe, lipid, coronary heart, atherosclerosis, coronary, cholesterol, abca1	Knockdown of GAS5 Inhibits Atherosclerosis Progression via Reducing EZH2-Mediated ABCA1 Transcription in ApoE<sup>-/-</sup> Mice.
pops_plus	29099095	20171104	8	stat3, coronary artery, sp1, cholesterol, cd36, coronary, abca1, artery	IL-33 promotes IL-10 production in macrophages: a role for IL-33 in macrophage foam cell formation.
pops_plus	29103089	20171106	8	heart, cetp, lipg, coronary heart, lcat, coronary, cholesterol, galnt2	HDL Cholesterol Metabolism and the Risk of CHD: New Insights from Human Genetics.
pops_plus	29107136	20171107	8	apoe, abcg5, atherosclerosis, abca1, lipid, lipids, cholesterol, cardiovascular	Maternal hypercholesterolemia enhances oxysterol concentration in mothers and newly weaned offspring but is attenuated by maternal phytosterol supplementation.
pops_plus	24956927	20140625	8	heart, pcsk9, apob, lipid, coronary heart, coronary, ldlr, cholesterol	Targeted genetic testing for familial hypercholesterolaemia using next generation sequencing: a population-based study.
pops_plus	26641553	20151208	8	apoe, apob, lipid, lipids, cholesterol, fads1, cetp, triglycerides	Genetic Variants and Systemic Complement Activation Levels Are Associated With Serum Lipoprotein Levels in Age-Related Macular Degeneration.
pops_plus	26620683	20151202	8	apob, coronary artery, atherosclerosis, cd36, coronary, artery, apoa1, lipid	Is plasma-soluble CD36 associated with density of atheromatous plaque and ankle-brachial index in early-onset coronary artery disease patients?
pops_plus	26624898	20151202	8	lipc, cetp, coronary artery, coronary, hyperlipidemia, lpl, artery, diabetes	Effect of High-Density Lipoprotein Metabolic Pathway Gene Variations and Risk Factors on Neovascular Age-Related Macular Degeneration and Polypoidal Choroidal Vasculopathy in China.
pops_plus	24593955	20140306	8	lipid, atherosclerosis, fabp4, fatty acid, cardiovascular, diabetes, triglycerides, lipids	Short term resistance training enhanced plasma apoA-I and FABP4 levels in Streptozotocin-induced diabetic rats.
pops_plus	24595513	20140306	8	abcg1, type 2 diabetes, abca1, fatty acid, cholesterol, artery, diabetes, cardiovascular	Linoleic acid suppresses cholesterol efflux and ATP-binding cassette transporters in murine bone marrow-derived macrophages.
pops_plus	11007687	20000929	8	apoe, atherosclerosis, triglyceride, coronary, lipids, cholesterol, artery, cardiovascular	Effect of apolipoprotein E polymorphism on serum lipid, lipoproteins, and atherosclerosis in hemodialysis patients.
pops_plus	23701995	20130525	8	apob, lipid, atherosclerosis, coronary, cholesterol, artery, cardiovascular, coronary artery	Gender-specific association of coronary artery calcium and lipoprotein parameters: the Heinz Nixdorf Recall Study.
pops_plus	23704675	20130525	8	type 2 diabetes, apob, lipid, lipids, cholesterol, cardiovascular, triglycerides, diabetes	Lipid and inflammatory cardiovascular risk worsens over 3 years in youth with type 2 diabetes: the TODAY clinical trial.
pops_plus	2203216	19900101	8	heart, apoe, cetp, coronary heart, coronary, ldlr, cholesterol, apob	Risk factor variability and coronary heart disease.
pops_plus	31252694	20190630	8	type 2 diabetes, cetp, lipid, triglyceride, cholesterol, cardiovascular, triglycerides, diabetes	HDL Triglycerides: A New Marker of Metabolic and Cardiovascular Risk.
pops_plus	11452214	20010714	8	apob, lipid, lcat, triglyceride, pltp, fatty acid, diabetes, cardiovascular	[Insulin sensitiviy and lipids].
pops_plus	34977044	20220103	8	heart, stat3, lipid, coronary heart, atherosclerosis, coronary, stroke, cardiovascular	Ferroptosis Signaling and Regulators in Atherosclerosis.
pops_plus	34975123	20220103	8	heart, coronary artery, pon1, triglyceride, coronary, cholesterol, artery, cardiovascular	The risk stratification of coronary vascular disease as linked to homocysteine, its modulating genes, genetic polymorphisms, conventional predictors, and with antihypertensive medicaments.
pops_plus	34973959	20220102	8	heart, coronary artery, coronary, ahr, stroke, artery, diabetes, cardiovascular	Association of Motoric Cognitive Risk Syndrome with Cardiovascular and Noncardiovascular Factors: A Systematic Review and Meta-Analysis.
pops_plus	34973959	20220102	8	heart, coronary artery, coronary, ahr, stroke, artery, diabetes, cardiovascular	Association of Motoric Cognitive Risk Syndrome with Cardiovascular and Noncardiovascular Factors: A Systematic Review and Meta-analysis.
pops_plus	34995985	20220107	8	apob, lipid, triglyceride, apoa1, lipids, cholesterol, triglycerides, cardiovascular	Association of adolescent lipoprotein subclass profile with carotid intima-media thickness and comparison to adults: Prospective population-based cohort studies.
pops_plus	34991937	20220107	8	pcsk9, lipid, atherosclerosis, ldlr, cholesterol, diabetes, triglycerides, cardiovascular	Association between causative mutations and response to PCSK9 inhibitor therapy in subjects with familial hypercholesterolemia: A single center real-world study.
pops_plus	34988225	20220106	8	lipid, vldlr, hyperlipidemia, ldlr, srebf1, ppara, diabetes, cardiovascular	Target Deconvolution of Fenofibrate in Nonalcoholic Fatty Liver Disease Using Bioinformatics Analysis.
pops_plus	34998859	20220109	8	pcsk9, apob, coronary artery, ldlr, coronary, cetp, artery, lipid	Targeted exome sequencing in South Indian patients with Familial hypercholesterolemia.
pops_plus	34998859	20220109	8	pcsk9, apob, coronary artery, ldlr, coronary, cetp, artery, lipid	Targeted Exome Sequencing in South Indian patients with Familial Hypercholesterolemia.
pops_plus	34996506	20220108	8	apob, lipid, apoa1, lipids, cholesterol, diabetes, triglycerides, cardiovascular	The difference of lipid profiles between psoriasis with arthritis and psoriasis without arthritis and sex-specific downregulation of methotrexate on the apolipoprotein B/apolipoprotein A-1 ratio.
pops_plus	28611100	20170615	8	abcg1, apoe, lipid, atherosclerosis, lcat, abca1, cholesterol, cardiovascular	AMPK activation enhances the anti-atherogenic effects of high density lipoproteins in apoE<sup>-/-</sup> mice.
pops_plus	22701627	20120616	8	lrp1, lipid, atherosclerosis, triglyceride, ldlr, apoe, lipids, cholesterol	Impaired LDL receptor-related protein 1 translocation correlates with improved dyslipidemia and atherosclerosis in apoE-deficient mice.
pops_plus	22698793	20120616	8	heart, apob, lipid, coronary heart, coronary, ldlr, cholesterol, triglycerides	The molecular basis of familial hypercholesterolemia in the Czech Republic: spectrum of LDLR mutations and genotype-phenotype correlations.
pops_plus	30168082	20180901	8	apob, coronary artery, peripheral vascular, coronary, cholesterol, artery, cardiovascular, diabetes	Lipoprotein-associated phospholipase A2 predicts cardiovascular events in dialyzed patients.
pops_plus	30176239	20180904	8	type 2 diabetes, apoe, coronary artery, atherosclerosis, coronary, cd14, artery, diabetes	Changes in CDKN2A/2B expression associate with T-cell phenotype modulation in atherosclerosis and type 2 diabetes mellitus.
pops_plus	15543563	20041116	8	apoe, apob, lipid, coronary, lipids, cholesterol, artery, coronary artery	Five polymorphisms in gene candidates for cardiovascular disease in Afro-Brazilian individuals.
pops_plus	31448741	20190827	8	heart, pcsk9, lipid, atherosclerosis, lipids, cholesterol, triglycerides, cardiovascular	Pharmacological lipid-modification therapies for prevention of ischaemic heart disease: current and future options.
pops_plus	31449060	20190827	8	apoe, coronary artery, atherosclerosis, triglyceride, coronary, artery, cardiovascular, diabetes	Is APOC3 the driver of cardiovascular disease in people with type I diabetes mellitus?
pops_plus	31443207	20190825	8	abcg1, lipid, abca1, coronary, coronary artery, cholesterol, artery, cardiovascular	Relationship between HDL Cholesterol Efflux Capacity, Calcium Coronary Artery Content, and Antibodies against ApolipoproteinA-1 in Obese and Healthy Subjects.
pops_plus	31461490	20190829	8	heart, apoe, cetp, coronary heart, atherosclerosis, coronary, cholesterol, cardiovascular	Oncostatin M reduces atherosclerosis development in APOE*3Leiden.CETP mice and is associated with increased survival probability in humans.
pops_plus	25702058	20150223	8	pcsk9, coronary artery, atherosclerosis, coronary, cholesterol, sort1, artery, cardiovascular	Sortilin, encoded by the cardiovascular risk gene SORT1, and its suggested functions in cardiovascular disease.
pops_plus	12643186	20030320	8	type 2 diabetes, apob, coronary artery, atherosclerosis, coronary, artery, triglycerides, diabetes	The role of non-LDL:non-HDL particles in atherosclerosis.
pops_plus	12646342	20030321	8	lipid, triglyceride, coronary, met, cholesterol, artery, triglycerides, coronary artery	Efficacy of rosuvastatin 10 mg in patients with the metabolic syndrome.
pops_plus	12647264	20030321	8	heart, cetp, coronary heart, lcat, triglyceride, coronary, cholesterol, triglycerides	Cholesteryl ester transfer protein and lecithin:cholesterol acyltransferase activities in hispanic and anglo postmenopausal women: associations with total and regional body fat.
pops_plus	15752095	20050309	8	heart, lipid, coronary heart, atherosclerosis, coronary, stroke, gc, fatty acid	Pilot study of a breath test for volatile organic compounds associated with oral malodor: evidence for the role of oxidative stress.
pops_plus	10404843	19990715	8	heart, lipid, coronary heart, coronary, met, lipids, cholesterol, cardiovascular	Safety of low-density lipoprotein cholestrol reduction with atorvastatin versus simvastatin in a coronary heart disease population (the TARGET TANGIBLE trial).
pops_plus	21823416	20110810	8	heart, cetp, coronary heart, triglyceride, coronary, pltp, lipids, cholesterol	[Study on the correlation between Chinese medical syndrome types and serum levels of PLTP and CETP in coronary heart disease patients].
pops_plus	30701732	20190201	8	heart, coronary heart, atherosclerosis, coronary, met, pad, artery, diabetes	The association of lipoprotein(a) and apolipoprotein(a) phenotypes with peripheral artery disease.
pops_plus	18333374	20080313	8	heart, lipid, coronary heart, coronary, cd14, cholesterol, artery, coronary artery	Integrin expression on monocytes and lymphocytes in unstable angina short term effects of atorvastatin.
pops_plus	20651286	20100724	8	heart, lipid, coronary heart, atherosclerosis, coronary, ldlr, lipids, cholesterol	TRAF5 deficiency accelerates atherogenesis in mice by increasing inflammatory cell recruitment and foam cell formation.
pops_plus	20653352	20100727	8	coronary artery, triglyceride, coronary, met, cholesterol, artery, cardiovascular, diabetes	The Collaborative Cardiovascular Risk Reduction in Primary Care (CCARP) study.
pops_plus	20656518	20100727	8	coronary artery, coronary, met, stroke, cholesterol, artery, diabetes, cardiovascular	Prognostic value of Framingham Cardiovascular Risk Score in hospitalized stroke patients.
pops_plus	25383724	20141111	8	heart, lipid, coronary heart, coronary, met, cholesterol, triglycerides, cardiovascular	The impact of the modified Atkins diet on lipid profiles in adults with epilepsy.
pops_plus	21875686	20110831	8	lipid, cholesterol, lcat, coronary, abca1, artery, apoa1, coronary artery	Increased risk of coronary artery disease in Caucasians with extremely low HDL cholesterol due to mutations in ABCA1, APOA1, and LCAT.
pops_plus	21875689	20110831	8	abcg1, cetp, lipid, atherosclerosis, triglyceride, abca1, cholesterol, triglycerides	Synthetic LXR agonist inhibits the development of atherosclerosis in New Zealand White rabbits.
pops_plus	33164579	20201109	8	heart, tp53, coronary artery, kit, pten, artery, coronary, bcl2	Extracellular vesicles enriched with miR-150 released by macrophages regulates the TP53-IGF-1 axis to alleviate myocardial infarction.
pops_plus	31198145	20190615	8	heart, apob, coronary artery, coronary heart, coronary, cholesterol, artery, diabetes	[Relationship between serum levels of osteoproteins, inflammatory cytokines and coronary heart disease and disease severity].
pops_plus	31199772	20190615	8	apob, atherosclerosis, apoa1, cholesterol, artery, diabetes, triglycerides, cardiovascular	Cardiovascular risk factors in children with type 1 diabetes mellitus.
pops_plus	33152931	20201106	8	type 2 diabetes, lipid, triglyceride, kit, hyperlipidemia, lpl, lipids, diabetes	Pomegranate flower extract bidirectionally regulates the proliferation, differentiation and apoptosis of 3T3-L1 cells through regulation of PPARŒ≥ expression mediated by PI3K-AKT signaling pathway.
pops_plus	33155658	20201106	8	heart, stat3, coronary heart, coronary, pten, jak2, bcl2, cardiovascular	BCL2‚Äëregulated apoptotic process in myocardial ischemia‚Äëreperfusion injury (Review).
pops_plus	33150530	20201105	8	heart, coronary heart, coronary, met, stroke, lipids, diabetes, cardiovascular	100% Fruit juice intake and cardiovascular risk: a systematic review and meta-analysis of prospective and randomised controlled studies.
pops_plus	24098343	20131008	8	heart, coronary artery, coronary heart, atherosclerosis, tcf7l2, coronary, wwox, artery	Genome-wide association study of gene by smoking interactions in coronary artery calcification.
pops_plus	27514532	20160813	8	type 2 diabetes, lipid, irs1, coronary, stroke, artery, diabetes, coronary artery	IRS proteins and diabetic complications.
pops_plus	31145122	20190531	8	heart, apob, lipid, atherosclerosis, lipids, cholesterol, diabetes, cardiovascular	Inflammatory joint diseases and atherosclerosis: time to look beyond the 'lipid paradox'.
pops_plus	28125987	20170128	8	type 2 diabetes, apob, coronary artery, coronary, cholesterol, artery, triglycerides, diabetes	Method for estimating high sdLDL-C by measuring triglyceride and apolipoprotein B levels.
pops_plus	27615511	20160913	8	type 2 diabetes, coronary artery, atherosclerosis, coronary, pnpla3, artery, cardiovascular, diabetes	Association of the I148M/PNPLA3 (rs738409) polymorphism with premature coronary artery disease, fatty liver, and insulin resistance in type 2 diabetic patients and healthy controls. The GEA study.
pops_plus	27629733	20160916	8	apob, lipid, atherosclerosis, apoa1, lipids, cholesterol, triglycerides, cardiovascular	Evaluation of Selected Atherosclerosis Risk Factors in Women with Subclinical Hypothyroidism Treated with L-Thyroxine.
pops_plus	27629735	20160916	8	heart, f2, apoe, coronary heart, coronary, stroke, fgb, cardiovascular	The APOE E4 Allele Confers Increased Risk of Ischemic Stroke Among Greek Carriers.
pops_plus	11223438	20010227	8	lipid, atherosclerosis, coronary, met, coronary artery, cholesterol, artery, diabetes	Coronary artery disease in patients at low risk--apolipoprotein AI as an independent risk factor.
pops_plus	19001529	20081113	8	heart, lipid, coronary, fabp4, coronary artery, fatty acid, artery, diabetes	The association of serum adipocyte fatty acid-binding protein with coronary artery disease in Korean adults.
pops_plus	23555974	20130405	8	lipid, atherosclerosis, coronary, lipids, cholesterol, artery, abca1, coronary artery	Genetic variants from lipid-related pathways and risk for incident myocardial infarction.
pops_plus	17098305	20061114	8	heart, lipid, coronary heart, atherosclerosis, triglyceride, coronary, cd14, cholesterol	CD14 C (-260)T polymorphism, atherosclerosis, elderly: role of cytokines and metallothioneins.
pops_plus	31863971	20191222	8	abcg1, lipid, cholesterol, lcat, coronary, abca1, artery, coronary artery	Structural and functional basis for increased HDL-cholesterol levels due to the naturally occurring V19L mutation in human apolipoprotein A-I.
pops_plus	30561264	20181219	8	heart, type 2 diabetes, apob, lipid, cholesterol, diabetes, triglycerides, cardiovascular	Ezetimibe in Combination With Simvastatin Reduces Remnant Cholesterol Without Affecting Biliary Lipid Concentrations in Gallstone Patients.
pops_plus	30532597	20181212	8	heart, pcsk9, apob, lipid, coronary heart, coronary, ldlr, cholesterol	How well can familial hypercholesterolemia be identified in an electronic health record database?
pops_plus	30526472	20181212	8	lipid, atherosclerosis, triglyceride, coronary, met, artery, cardiovascular, coronary artery	The Beneficial Therapy with Colchicine for Atherosclerosis via Anti-inflammation and Decrease in Hypertriglyceridemia.
pops_plus	35090991	20220129	8	heart, coronary artery, coronary, met, stroke, pad, artery, diabetes	Risk Factors for Mortality within 5 Years of Carotid Endarterectomy for Asymptomatic Stenosis.
pops_plus	35047123	20220120	8	type 2 diabetes, lipid, atherosclerosis, triglyceride, mif, stroke, cholesterol, diabetes	Sodium ozagrel and atorvastatin for type 2 diabetes patients with lacunar cerebral infarction.
pops_plus	35068334	20220124	8	type 2 diabetes, kit, hyperlipidemia, pten, cholesterol, bcl2, triglycerides, diabetes	Salvianolic acid B alleviates diabetic endothelial and mitochondrial dysfunction by down-regulating apoptosis and mitophagy of endothelial cells.
pops_plus	18270459	20080214	8	type 2 diabetes, apoe, cetp, lipid, cholesterol, hyperlipidemia, abca1, diabetes	HMG-CoA reductase inhibitor, simvastatin improves reverse cholesterol transport in type 2 diabetic patients with hyperlipidemia.
[truncated: 141,972 more rows]
