# Supplementary material for: Implicating genes, pleiotropy, and sexual dimorphism at blood lipid loci through multi-ancestry meta-analysis
Source: Genome Biol. 2022 Dec 27;23:268. doi: 10.1186/s13059-022-02837-1 (PMC9793579; doi:10.1186/s13059-022-02837-1)
Supplement: Supplementary file 5 — Additional file 5: Table S4. Frequency of lipid-related publications for the PoPS+ prioritized genes. [file 13059_2022_2837_MOESM5_ESM.xlsx]

## Sheet: Sheet1
Table S4. Frequency of lipid-related publications for the PoPS+ prioritized genes
Genes	Freq
MET	27692
APOE	12320
GC	11577
APOB	7033
KIT	5635
SCD	4904
LPL	4708
LDLR	4457
F2	3800
CD36	3737
ABCA1	3459
BAD	3195
PCSK9	3110
HP	3088
TF	3020
STAT3	2722
AHR	2704
POR	2379
CETP	2372
CD14	2062
PTEN	1934
LCAT	1912
PON1	1695
CCS	1614
APOA1	1596
FABP4	1328
BCL2	1189
ABCG1	1143
CYP7A1	1120
JAK2	1012
PPARG	1008
NPC1	992
SP1	985
SOD1	972
GATA4	961
HMGCR	946
TCF7L2	880
IGF1	870
SMAD3	843
IRS1	801
GCK	778
LEPR	711
ABCG5	678
AKT1	663
MIF	624
RBP4	569
CYP1A1	567
VEGFA	549
ANGPTL4	490
ALDH2	487
HNF1A	484
PPARA	483
PNPLA3	481
INSR	444
FADS1	432
PLTP	427
SREBF1	415
TP53	407
HNF4A	391
KRAS	383
SKI	367
ANGPTL3	340
CYP27A1	326
LRP1	316
RELA	315
LIPC	313
NF1	313
ACOX1	301
COMT	301
IGF1R	295
MYB	273
SOX9	265
LIPA	263
FABP1	258
PRDM16	258
HTT	257
FOXO3	252
MTTP	252
PCK1	247
BRCA1	243
ARNT	242
DNMT1	240
TGFB1	233
ELOVL6	226
GCLC	225
VLDLR	222
VIM	218
APOM	212
FGFR1	208
PTPN11	199
GRB2	195
PLG	180
CSK	172
DHCR24	164
PPARD	158
CEBPA	155
PKD1	154
TET2	149
NFKB1	146
PNPLA2	145
NR1H3	141
CDKN1A	139
EIF4E	139
SORT1	138
FN1	134
SLC2A2	132
ADD1	131
GAS6	131
ACTB	130
ABCB4	127
CYP2B6	124
FGB	120
PDE3B	118
ABCB11	117
FGFR4	117
NRP1	116
LIPG	110
HPN	108
BAG3	106
HDAC5	104
MERTK	102
HBB	100
ACADS	97
BRCA2	97
SOX17	97
IGF2R	96
NR1H4	96
GPAM	94
FGFR2	93
PDE3A	93
MITF	91
TRIB1	91
HADHA	89
CREB1	88
CTSB	87
FLT1	87
LDLRAP1	85
PIK3R1	85
RXRA	85
MLXIPL	78
CDH5	77
ACACB	75
APOH	74
TSG101	72
ACSL5	71
IRF1	71
GSTA1	69
HMGA1	69
RORA	68
MAFB	67
MGA	65
GSK3B	64
HK1	64
SERPINA1	63
CASP8	62
MSRA	61
HMGA2	60
NR5A2	59
EEF2	58
GALNT2	58
ARNTL	57
COL4A2	56
NR0B2	56
CITED2	55
JUND	55
PARK2	55
NF2	53
PCK2	53
PRKAA2	51
FADS3	50
NFAT5	50
PAX8	50
ADCY5	47
BACH1	47
EP300	47
FOXP1	47
SUMO1	47
DAB2	46
ASXL1	44
ATP8B1	44
TFR2	43
ATP2B1	42
MED1	41
CYP26A1	40
PPP1R3B	40
ZFHX3	39
ATXN2	38
MEIS1	38
PEG3	38
TIRAP	38
HSD17B4	37
GAB2	36
OGDH	36
SDC1	34
ZFPM2	34
MON2	33
CUBN	32
MGST1	32
BRD2	31
PEX6	31
EBF1	30
BCL2L11	29
QKI	29
ANK1	28
BCL3	27
ETV5	27
PLAUR	27
CELF1	26
LPIN2	26
MYLIP	26
WWOX	26
PREB	24
RPS6KB1	24
SEC16B	24
THRB	24
VTN	24
JMJD1C	23
NSD1	23
PCSK6	22
DYSF	21
GBF1	21
KLF13	21
PRDM1	21
SLC27A5	21
COL18A1	20
LRBA	20
NFIA	20
ITGA1	19
KDM6B	19
LRPAP1	19
NCOA1	19
NRIP1	19
PRKCE	19
KIF11	18
PLCG1	18
PTPRC	18
TNKS	18
UBE2E2	18
ARID1A	17
ZBTB20	17
ABCA5	16
ACO1	16
FAM13A	16
KDM1A	16
LGR4	16
ARID5B	15
NFE2L1	15
NFIB	15
PVRL2	15
SGPP1	15
UGT2B4	15
CMIP	14
M6PR	14
PCSK7	14
XPO1	14
CDKN2C	13
COBLL1	13
GFI1	13
GOSR2	13
MAP3K1	13
MYL4	13
NCOA2	13
SIDT2	13
SPTA1	13
TRPS1	13
B4GALT1	12
CUX1	12
LCORL	12
PRKAR2B	12
TOP1	12
ZNF423	12
CADM1	11
CHD4	11
CTBP2	11
EIF4B	11
IKZF1	11
IRF2	11
ITPR2	11
P4HA1	11
RILP	11
SDC4	11
SPRY4	11
TIMD4	11
UBE2I	11
ZMIZ1	11
APPL2	10
CYP2C18	10
DENND1A	10
GNAI2	10
HIP1R	10
IRF2BP2	10
PCM1	10
PPM1A	10
SERPINF2	10
SFPQ	10
AFF1	9
MGRN1	9
PITPNC1	9
PLA2G12B	9
SLC11A2	9
SMG6	9
ST3GAL4	9
A1CF	8
MAP1A	8
NUCB1	8
PIK3C2A	8
TCF12	8
TRAF4	8
WWP2	8
XRN1	8
AMPD2	7
ATXN1	7
BPTF	7
CCNL1	7
GABBR1	7
HLX	7
HSD3B7	7
ITIH2	7
MACF1	7
MLEC	7
MTSS1	7
MYO9B	7
PDXDC1	7
RPS6KA1	7
SEC31A	7
SLC12A2	7
SMARCD1	7
SURF4	7
TLE3	7
CBX3	6
FKBP4	6
FOXN3	6
GNAI3	6
MSI2	6
NID2	6
NRD1	6
PABPC4	6
PLK3	6
POM121	6
PTPN12	6
SUMO3	6
TNKS2	6
CPEB4	5
CREB3L2	5
FNDC3B	5
H2AFX	5
HSD17B11	5
INPP5A	5
MARK2	5
MLXIP	5
RRBP1	5
SETD5	5
SLC22A18	5
SPRED2	5
STAG1	5
TP53BP1	5
TRIM27	5
WDR26	5
AFF4	4
CHD9	4
CUL4A	4
CYP2W1	4
HELLS	4
RBCK1	4
SEC24A	4
SEC61A1	4
TNPO1	4
UBE2C	4
ZFP36L2	4
ZFPM1	4
ZNF652	4
ASCC2	3
ATXN2L	3
DDX17	3
DENND4C	3
EPN1	3
ESYT2	3
EVI5	3
FNIP1	3
FZR1	3
HERC1	3
HIPK1	3
HOXB6	3
KPNB1	3
NR2F6	3
PRKD2	3
RAB11B	3
SETBP1	3
SLC25A29	3
SMC4	3
SNX8	3
USP3	3
ANKHD1	2
ARID2	2
BTAF1	2
DGKQ	2
DIDO1	2
FCGRT	2
GIPC2	2
GOLGA4	2
HM13	2
JMY	2
KDELR2	2
MICAL3	2
OSGIN1	2
PDS5A	2
PITPNM2	2
PRRC2A	2
RAD23B	2
RBM39	2
SLC25A37	2
TRIP11	2
TSC22D4	2
TTC28	2
ZKSCAN4	2
ZNFX1	2
BRWD1	1
CDCA2	1
CLDN15	1
COX16	1
DCUN1D2	1
FBRSL1	1
GATAD2B	1
ITSN2	1
KMT2E	1
LMAN2	1
MIIP	1
MS4A7	1
MXD4	1
RPL18	1
SIPA1L3	1
SRRM1	1
SSBP3	1
SYNCRIP	1
TBC1D14	1
TBC1D8	1
TMEM150A	1
TRAPPC12	1
TRPC4AP	1
TXNDC11	1
YDJC	1
ZNF292	1
ZZEF1	1
USP24	0
TMED5	0
PRPF38B	0
UBXN4	0
ANKRD28	0
WDR6	0
GLYCTK	0
USO1	0
HIST1H2BD	0
HLA-A	0
UNC5CL	0
TSPYL1	0
BRI3	0
ZNF703	0
UBE2R2	0
CENPP	0
TNKS1BP1	0
CASC5	0
AP1G1	0
PQLC1	0
ZGPAT	0
LCA5L	0
TUBGCP6	0
