# Supplementary material for: Implicating genes, pleiotropy, and sexual dimorphism at blood lipid loci through multi-ancestry meta-analysis
Source: Genome Biol. 2022 Dec 27;23:268. doi: 10.1186/s13059-022-02837-1 (PMC9793579; doi:10.1186/s13059-022-02837-1)
Supplement: Supplementary file 7 — Additional file 7: Table S5. Lookup of all prioritized lipid genes in the Therapeutic Target Database 2022. [file 13059_2022_2837_MOESM7_ESM.xlsx]

## Sheet: Sheet1
Table S5. Lookup of all prioritized lipid genes in the Therapeutic Target Database 2022
ttd_id	gene	type	ttd_did	drug	status	disease
T00494	ABCA1	Successful target	D01WMW	RG7232	Investigative	Coronary atherosclerosis;Inborn lipid metabolism error;Dyslipidemia
T00494	ABCA1	Successful target	D0H2DQ	Probucol	Approved	Coronary atherosclerosis;Inborn lipid metabolism error;Dyslipidemia
T00895	PRKCE	Successful target	D00NYT	3,4-di-(4-methoxyphenyl)-1H-pyrrole-2,5-dione	Investigative	Anxiety disorder;Liver vascular disorder;Malaria;Alzheimer disease;Postoperative inflammation
T00895	PRKCE	Successful target	D00TWA	[2,2':5',2'']Terthiophen-4-yl-methanol	Investigative	Anxiety disorder;Liver vascular disorder;Malaria;Alzheimer disease;Postoperative inflammation
T00895	PRKCE	Successful target	D02PUV	4-[1-(4-hydroxyphenyl)-3-methyl-1-butenyl]phenol	Investigative	Anxiety disorder;Liver vascular disorder;Malaria;Alzheimer disease;Postoperative inflammation
T00895	PRKCE	Successful target	D02QME	2-(4-Hydroxy-phenyl)-3,3-diphenyl-acrylonitrile	Investigative	Anxiety disorder;Liver vascular disorder;Malaria;Alzheimer disease;Postoperative inflammation
T00895	PRKCE	Successful target	D05LRV	[2,2':5',2'']Terthiophene-4,5''-dicarbaldehyde	Investigative	Anxiety disorder;Liver vascular disorder;Malaria;Alzheimer disease;Postoperative inflammation
T00895	PRKCE	Successful target	D06AOY	3-(indole-3-yl)-4-phenyl-1H-pyrrole-2,5-dione	Investigative	Anxiety disorder;Liver vascular disorder;Malaria;Alzheimer disease;Postoperative inflammation
T00895	PRKCE	Successful target	D06ZCX	LY-326449	Investigative	Anxiety disorder;Liver vascular disorder;Malaria;Alzheimer disease;Postoperative inflammation
T00895	PRKCE	Successful target	D09TSC	Ro-32-0557	Investigative	Anxiety disorder;Liver vascular disorder;Malaria;Alzheimer disease;Postoperative inflammation
T00895	PRKCE	Successful target	D09XIE	3-(4-Hydroxy-phenyl)-2,3-diphenyl-acrylonitrile	Investigative	Anxiety disorder;Liver vascular disorder;Malaria;Alzheimer disease;Postoperative inflammation
T00895	PRKCE	Successful target	D0A8MN	3,3-Bis-(4-methoxy-phenyl)-2-phenyl-acrylonitrile	Investigative	Anxiety disorder;Liver vascular disorder;Malaria;Alzheimer disease;Postoperative inflammation
T00895	PRKCE	Successful target	D0C3WY	3,4-diphenyl-1H-pyrrole-2,5-dione	Investigative	Anxiety disorder;Liver vascular disorder;Malaria;Alzheimer disease;Postoperative inflammation
T00895	PRKCE	Successful target	D0D3MR	[2,2':5',2'']Terthiophene-4-carbaldehyde	Investigative	Anxiety disorder;Liver vascular disorder;Malaria;Alzheimer disease;Postoperative inflammation
T00895	PRKCE	Successful target	D0D4ZL	Phorbol 12-myristate	Investigative	Anxiety disorder;Liver vascular disorder;Malaria;Alzheimer disease;Postoperative inflammation
T00895	PRKCE	Successful target	D0E6AH	Bryostatin-1	Phase 2	Anxiety disorder;Liver vascular disorder;Malaria;Alzheimer disease;Postoperative inflammation
T00895	PRKCE	Successful target	D0EK0G	3-(4-methoxyphenyl)-4-phenyl-1H-pyrrole-2,5-dione	Investigative	Anxiety disorder;Liver vascular disorder;Malaria;Alzheimer disease;Postoperative inflammation
T00895	PRKCE	Successful target	D0L8HO	RO-316233	Investigative	Anxiety disorder;Liver vascular disorder;Malaria;Alzheimer disease;Postoperative inflammation
T00895	PRKCE	Successful target	D0Q3GQ	4-cycloheptyliden(4-hydroxyphenyl)methylphenol	Investigative	Anxiety disorder;Liver vascular disorder;Malaria;Alzheimer disease;Postoperative inflammation
T00895	PRKCE	Successful target	D0S9UK	2,3,3-Triphenyl-acrylonitrile	Investigative	Anxiety disorder;Liver vascular disorder;Malaria;Alzheimer disease;Postoperative inflammation
T00895	PRKCE	Successful target	D0T0UH	3,3-Bis-(4-hydroxy-phenyl)-2-phenyl-acrylonitrile	Investigative	Anxiety disorder;Liver vascular disorder;Malaria;Alzheimer disease;Postoperative inflammation
T00895	PRKCE	Successful target	D0V9SW	4-cyclohexyliden(4-hydroxyphenyl)methylphenol	Investigative	Anxiety disorder;Liver vascular disorder;Malaria;Alzheimer disease;Postoperative inflammation
T00895	PRKCE	Successful target	D0Y4AW	Meprobamate	Approved	Anxiety disorder;Liver vascular disorder;Malaria;Alzheimer disease;Postoperative inflammation
T01283	TSG101	Clinical trial target	D03RCB	FGI-101-1A6	Phase 1	Influenza
T02617	TF	Clinical trial target	D0A1GR	CALAA-01	Phase 1	Solid tumour/cancer
T02617	TF	Clinical trial target	D0QB8Q	EP-2167	Preclinical	Solid tumour/cancer
T03046	KRAS	Clinical trial target	D0KK9V	GI-4000 + gemcitabine	Phase 2	Pancreatic cancer
T03818	PPARG	Literature-reported target	D00ACX	2-chloro-5-nitro-N-phenylbenzamide	Investigative	Pulmonary hypertension;Sjogren syndrome;Type 2 diabetes mellitus
T03818	PPARG	Literature-reported target	D00EOP	AD-5061	Investigative	Pulmonary hypertension;Sjogren syndrome;Type 2 diabetes mellitus
T03818	PPARG	Literature-reported target	D01RPM	(E)-9-nitrooctadec-9-enoic acid	Investigative	Pulmonary hypertension;Sjogren syndrome;Type 2 diabetes mellitus
T03818	PPARG	Literature-reported target	D01UVA	tagitinin A	Investigative	Pulmonary hypertension;Sjogren syndrome;Type 2 diabetes mellitus
T03818	PPARG	Literature-reported target	D03BPG	T0070907	Investigative	Pulmonary hypertension;Sjogren syndrome;Type 2 diabetes mellitus
T03818	PPARG	Literature-reported target	D04DYM	GW1929	Investigative	Pulmonary hypertension;Sjogren syndrome;Type 2 diabetes mellitus
T03818	PPARG	Literature-reported target	D04FVX	(E)-9-Nitrohexadec-9-enoicAcid	Investigative	Pulmonary hypertension;Sjogren syndrome;Type 2 diabetes mellitus
T03818	PPARG	Literature-reported target	D04JOG	TZD18	Investigative	Pulmonary hypertension;Sjogren syndrome;Type 2 diabetes mellitus
T03818	PPARG	Literature-reported target	D06GYO	(9Z,12E)-12-nitrooctadeca-9,12-dienoic acid	Investigative	Pulmonary hypertension;Sjogren syndrome;Type 2 diabetes mellitus
T03818	PPARG	Literature-reported target	D06IHG	(E)-10-nitrooctadec-9-enoic acid	Investigative	Pulmonary hypertension;Sjogren syndrome;Type 2 diabetes mellitus
T03818	PPARG	Literature-reported target	D06NHI	SB-213068	Investigative	Pulmonary hypertension;Sjogren syndrome;Type 2 diabetes mellitus
T03818	PPARG	Literature-reported target	D06OBX	tirotundin	Investigative	Pulmonary hypertension;Sjogren syndrome;Type 2 diabetes mellitus
T03818	PPARG	Literature-reported target	D06UVY	L-Tryptophan-L-aspartic acid	Investigative	Pulmonary hypertension;Sjogren syndrome;Type 2 diabetes mellitus
T03818	PPARG	Literature-reported target	D07IHY	BRL-48482	Investigative	Pulmonary hypertension;Sjogren syndrome;Type 2 diabetes mellitus
T03818	PPARG	Literature-reported target	D08QKF	nTzDpa	Investigative	Pulmonary hypertension;Sjogren syndrome;Type 2 diabetes mellitus
T03818	PPARG	Literature-reported target	D08QXD	L-783483	Investigative	Pulmonary hypertension;Sjogren syndrome;Type 2 diabetes mellitus
T03818	PPARG	Literature-reported target	DHCR24	reglitazar	Investigative	Pulmonary hypertension;Sjogren syndrome;Type 2 diabetes mellitus
T03818	PPARG	Literature-reported target	D09JII	L-796449	Investigative	Pulmonary hypertension;Sjogren syndrome;Type 2 diabetes mellitus
T03818	PPARG	Literature-reported target	D0A1SP	COOH	Investigative	Pulmonary hypertension;Sjogren syndrome;Type 2 diabetes mellitus
T03818	PPARG	Literature-reported target	D0B2UF	ISIS 105990	Investigative	Pulmonary hypertension;Sjogren syndrome;Type 2 diabetes mellitus
T03818	PPARG	Literature-reported target	D0B9MZ	ISIS 106008	Investigative	Pulmonary hypertension;Sjogren syndrome;Type 2 diabetes mellitus
T03818	PPARG	Literature-reported target	D0D0FQ	CHLOROCYCLINONE A	Investigative	Pulmonary hypertension;Sjogren syndrome;Type 2 diabetes mellitus
T03818	PPARG	Literature-reported target	D0F0MP	L-165461	Investigative	Pulmonary hypertension;Sjogren syndrome;Type 2 diabetes mellitus
T03818	PPARG	Literature-reported target	D0G3IV	ISIS 105987	Investigative	Pulmonary hypertension;Sjogren syndrome;Type 2 diabetes mellitus
T03818	PPARG	Literature-reported target	D0G9AI	L-Tryptophan-L-glutamine	Investigative	Pulmonary hypertension;Sjogren syndrome;Type 2 diabetes mellitus
T03818	PPARG	Literature-reported target	D0HI6O	PAT5A	Investigative	Pulmonary hypertension;Sjogren syndrome;Type 2 diabetes mellitus
T03818	PPARG	Literature-reported target	D0I2DF	GNF-PF-2893	Investigative	Pulmonary hypertension;Sjogren syndrome;Type 2 diabetes mellitus
T03818	PPARG	Literature-reported target	D0IW8V	L-Tryptophan-L-asparagine	Investigative	Pulmonary hypertension;Sjogren syndrome;Type 2 diabetes mellitus
T03818	PPARG	Literature-reported target	D0J9ZA	L-Tryptophan-L-2-aminoadipic acid	Investigative	Pulmonary hypertension;Sjogren syndrome;Type 2 diabetes mellitus
T03818	PPARG	Literature-reported target	D0JU5X	Bardoxolone methyl	Phase 3	Pulmonary hypertension;Sjogren syndrome;Type 2 diabetes mellitus
T03818	PPARG	Literature-reported target	D0L4PT	L-764406	Investigative	Pulmonary hypertension;Sjogren syndrome;Type 2 diabetes mellitus
T03818	PPARG	Literature-reported target	D0M7AT	L-Tryptophan-L-arginine	Investigative	Pulmonary hypertension;Sjogren syndrome;Type 2 diabetes mellitus
T03818	PPARG	Literature-reported target	D0M8VN	DRF 2519	Investigative	Pulmonary hypertension;Sjogren syndrome;Type 2 diabetes mellitus
T03818	PPARG	Literature-reported target	D0M9LL	(E)-12-Nitrooctadec-12-enoic Acid	Investigative	Pulmonary hypertension;Sjogren syndrome;Type 2 diabetes mellitus
T03818	PPARG	Literature-reported target	D0NW8N	ISIS 105989	Investigative	Pulmonary hypertension;Sjogren syndrome;Type 2 diabetes mellitus
T03818	PPARG	Literature-reported target	D0P1US	[125I]SB-236636	Investigative	Pulmonary hypertension;Sjogren syndrome;Type 2 diabetes mellitus
T03818	PPARG	Literature-reported target	D0P5QM	(E)-13-Nitrooctadec-12-enoic Acid	Investigative	Pulmonary hypertension;Sjogren syndrome;Type 2 diabetes mellitus
T03818	PPARG	Literature-reported target	D0P8XE	GNF-PF-3037	Investigative	Pulmonary hypertension;Sjogren syndrome;Type 2 diabetes mellitus
T03818	PPARG	Literature-reported target	D0Q4EU	BADGE	Investigative	Pulmonary hypertension;Sjogren syndrome;Type 2 diabetes mellitus
T03818	PPARG	Literature-reported target	D0Q4UD	(E)-5-Nitrooctadec-5-enoic Acid	Investigative	Pulmonary hypertension;Sjogren syndrome;Type 2 diabetes mellitus
T03818	PPARG	Literature-reported target	D0Q9FZ	LG100754	Investigative	Pulmonary hypertension;Sjogren syndrome;Type 2 diabetes mellitus
T03818	PPARG	Literature-reported target	D0R9VV	CHLOROCYCLINONE C	Investigative	Pulmonary hypertension;Sjogren syndrome;Type 2 diabetes mellitus
T03818	PPARG	Literature-reported target	D0RL8P	CHLOROCYCLINONE B	Investigative	Pulmonary hypertension;Sjogren syndrome;Type 2 diabetes mellitus
T03818	PPARG	Literature-reported target	D0SO9Q	GW0072	Investigative	Pulmonary hypertension;Sjogren syndrome;Type 2 diabetes mellitus
T03818	PPARG	Literature-reported target	D0T8JM	[3H]GW2331	Investigative	Pulmonary hypertension;Sjogren syndrome;Type 2 diabetes mellitus
T03818	PPARG	Literature-reported target	D0U5HX	CHLOROCYCLINONE D	Investigative	Pulmonary hypertension;Sjogren syndrome;Type 2 diabetes mellitus
T03818	PPARG	Literature-reported target	D0W9WU	(E)-10-Nitrohexadec-9-enoic Acid	Investigative	Pulmonary hypertension;Sjogren syndrome;Type 2 diabetes mellitus
T03818	PPARG	Literature-reported target	D0X3RZ	L-Tryptophan-L-leucine	Investigative	Pulmonary hypertension;Sjogren syndrome;Type 2 diabetes mellitus
T03818	PPARG	Literature-reported target	D0X9UJ	PD-068235	Investigative	Pulmonary hypertension;Sjogren syndrome;Type 2 diabetes mellitus
T03818	PPARG	Literature-reported target	D0Z2CY	Ploglitazone	Investigative	Pulmonary hypertension;Sjogren syndrome;Type 2 diabetes mellitus
T03818	PPARG	Literature-reported target	D0Z4NW	(E)-6-Nitrooctadec-5-enoic Acid	Investigative	Pulmonary hypertension;Sjogren syndrome;Type 2 diabetes mellitus
T03818	PPARG	Literature-reported target	D0Z7OX	LY-465608	Investigative	Pulmonary hypertension;Sjogren syndrome;Type 2 diabetes mellitus
T05661	LCAT	Clinical trial target	D0T5YB	MEDI6012	Phase 2	Coronary atherosclerosis;Myocardial infarction
T06020	FCGRT	Clinical trial target	D0QR7C	SYN-1327	Investigative	Myasthenia gravis
T06020	FCGRT	Clinical trial target	DZA98D	ARGX-113	Phase 3	Myasthenia gravis
T07533	APOB	Clinical trial target	D0X1IL	SPC4955	Phase 1	Hyper-lipoproteinaemia
T08391	JAK2	Successful target	D00JUI	Triazolo-pyridine derivative 1	Patented	Acquired hypomelanotic disorder;Atopic eczema;Myeloproliferative neoplasm;Pancreatic cancer;Rheumatoid arthritis;Thrombocytosis;Muscular dystrophy;Solid tumour/cancer;Alopecia;Asthma;B-cell lymphoma;Breast cancer;Lung cancer;Malignant haematopoietic neoplasm;Leukaemia;Multiple sclerosis;Multiple myeloma;Transplant rejection;Diffuse large B-cell lymphoma;Liver cancer
T08391	JAK2	Successful target	D00MAM	AMG-JAK2-01	Investigative	Acquired hypomelanotic disorder;Atopic eczema;Myeloproliferative neoplasm;Pancreatic cancer;Rheumatoid arthritis;Thrombocytosis;Muscular dystrophy;Solid tumour/cancer;Alopecia;Asthma;B-cell lymphoma;Breast cancer;Lung cancer;Malignant haematopoietic neoplasm;Leukaemia;Multiple sclerosis;Multiple myeloma;Transplant rejection;Diffuse large B-cell lymphoma;Liver cancer
T08391	JAK2	Successful target	D00MYW	NS-018	Phase 1/2	Acquired hypomelanotic disorder;Atopic eczema;Myeloproliferative neoplasm;Pancreatic cancer;Rheumatoid arthritis;Thrombocytosis;Muscular dystrophy;Solid tumour/cancer;Alopecia;Asthma;B-cell lymphoma;Breast cancer;Lung cancer;Malignant haematopoietic neoplasm;Leukaemia;Multiple sclerosis;Multiple myeloma;Transplant rejection;Diffuse large B-cell lymphoma;Liver cancer
T08391	JAK2	Successful target	D00RYA	SB-1578	Phase 1	Acquired hypomelanotic disorder;Atopic eczema;Myeloproliferative neoplasm;Pancreatic cancer;Rheumatoid arthritis;Thrombocytosis;Muscular dystrophy;Solid tumour/cancer;Alopecia;Asthma;B-cell lymphoma;Breast cancer;Lung cancer;Malignant haematopoietic neoplasm;Leukaemia;Multiple sclerosis;Multiple myeloma;Transplant rejection;Diffuse large B-cell lymphoma;Liver cancer
T08391	JAK2	Successful target	D01CRX	Benzimidazole derivative 7	Patented	Acquired hypomelanotic disorder;Atopic eczema;Myeloproliferative neoplasm;Pancreatic cancer;Rheumatoid arthritis;Thrombocytosis;Muscular dystrophy;Solid tumour/cancer;Alopecia;Asthma;B-cell lymphoma;Breast cancer;Lung cancer;Malignant haematopoietic neoplasm;Leukaemia;Multiple sclerosis;Multiple myeloma;Transplant rejection;Diffuse large B-cell lymphoma;Liver cancer
T08391	JAK2	Successful target	D01DBB	PMID27774824-Compound-Figure9Example2down	Patented	Acquired hypomelanotic disorder;Atopic eczema;Myeloproliferative neoplasm;Pancreatic cancer;Rheumatoid arthritis;Thrombocytosis;Muscular dystrophy;Solid tumour/cancer;Alopecia;Asthma;B-cell lymphoma;Breast cancer;Lung cancer;Malignant haematopoietic neoplasm;Leukaemia;Multiple sclerosis;Multiple myeloma;Transplant rejection;Diffuse large B-cell lymphoma;Liver cancer
T08391	JAK2	Successful target	D01EYJ	Ruxolitinib derivative 2	Patented	Acquired hypomelanotic disorder;Atopic eczema;Myeloproliferative neoplasm;Pancreatic cancer;Rheumatoid arthritis;Thrombocytosis;Muscular dystrophy;Solid tumour/cancer;Alopecia;Asthma;B-cell lymphoma;Breast cancer;Lung cancer;Malignant haematopoietic neoplasm;Leukaemia;Multiple sclerosis;Multiple myeloma;Transplant rejection;Diffuse large B-cell lymphoma;Liver cancer
T08391	JAK2	Successful target	D01FVC	Bis-aminopyrimidine derivative 1	Patented	Acquired hypomelanotic disorder;Atopic eczema;Myeloproliferative neoplasm;Pancreatic cancer;Rheumatoid arthritis;Thrombocytosis;Muscular dystrophy;Solid tumour/cancer;Alopecia;Asthma;B-cell lymphoma;Breast cancer;Lung cancer;Malignant haematopoietic neoplasm;Leukaemia;Multiple sclerosis;Multiple myeloma;Transplant rejection;Diffuse large B-cell lymphoma;Liver cancer
T08391	JAK2	Successful target	D01UAU	CTP-543	Phase 2	Acquired hypomelanotic disorder;Atopic eczema;Myeloproliferative neoplasm;Pancreatic cancer;Rheumatoid arthritis;Thrombocytosis;Muscular dystrophy;Solid tumour/cancer;Alopecia;Asthma;B-cell lymphoma;Breast cancer;Lung cancer;Malignant haematopoietic neoplasm;Leukaemia;Multiple sclerosis;Multiple myeloma;Transplant rejection;Diffuse large B-cell lymphoma;Liver cancer
T08391	JAK2	Successful target	D02NNT	PMID21493067C1d	Investigative	Acquired hypomelanotic disorder;Atopic eczema;Myeloproliferative neoplasm;Pancreatic cancer;Rheumatoid arthritis;Thrombocytosis;Muscular dystrophy;Solid tumour/cancer;Alopecia;Asthma;B-cell lymphoma;Breast cancer;Lung cancer;Malignant haematopoietic neoplasm;Leukaemia;Multiple sclerosis;Multiple myeloma;Transplant rejection;Diffuse large B-cell lymphoma;Liver cancer
T08391	JAK2	Successful target	D02UVS	NSC-1771	Investigative	Acquired hypomelanotic disorder;Atopic eczema;Myeloproliferative neoplasm;Pancreatic cancer;Rheumatoid arthritis;Thrombocytosis;Muscular dystrophy;Solid tumour/cancer;Alopecia;Asthma;B-cell lymphoma;Breast cancer;Lung cancer;Malignant haematopoietic neoplasm;Leukaemia;Multiple sclerosis;Multiple myeloma;Transplant rejection;Diffuse large B-cell lymphoma;Liver cancer
T08391	JAK2	Successful target	D02VGC	Pyrazolopyridine derivative 6	Patented	Acquired hypomelanotic disorder;Atopic eczema;Myeloproliferative neoplasm;Pancreatic cancer;Rheumatoid arthritis;Thrombocytosis;Muscular dystrophy;Solid tumour/cancer;Alopecia;Asthma;B-cell lymphoma;Breast cancer;Lung cancer;Malignant haematopoietic neoplasm;Leukaemia;Multiple sclerosis;Multiple myeloma;Transplant rejection;Diffuse large B-cell lymphoma;Liver cancer
T08391	JAK2	Successful target	D03PBI	Pyrrolo-pyridone derivative 2	Patented	Acquired hypomelanotic disorder;Atopic eczema;Myeloproliferative neoplasm;Pancreatic cancer;Rheumatoid arthritis;Thrombocytosis;Muscular dystrophy;Solid tumour/cancer;Alopecia;Asthma;B-cell lymphoma;Breast cancer;Lung cancer;Malignant haematopoietic neoplasm;Leukaemia;Multiple sclerosis;Multiple myeloma;Transplant rejection;Diffuse large B-cell lymphoma;Liver cancer
T08391	JAK2	Successful target	D03QAY	Pyrazolopyridine derivative 3	Patented	Acquired hypomelanotic disorder;Atopic eczema;Myeloproliferative neoplasm;Pancreatic cancer;Rheumatoid arthritis;Thrombocytosis;Muscular dystrophy;Solid tumour/cancer;Alopecia;Asthma;B-cell lymphoma;Breast cancer;Lung cancer;Malignant haematopoietic neoplasm;Leukaemia;Multiple sclerosis;Multiple myeloma;Transplant rejection;Diffuse large B-cell lymphoma;Liver cancer
T08391	JAK2	Successful target	D03TEE	Tricyclic heterocycle derivative 2	Patented	Acquired hypomelanotic disorder;Atopic eczema;Myeloproliferative neoplasm;Pancreatic cancer;Rheumatoid arthritis;Thrombocytosis;Muscular dystrophy;Solid tumour/cancer;Alopecia;Asthma;B-cell lymphoma;Breast cancer;Lung cancer;Malignant haematopoietic neoplasm;Leukaemia;Multiple sclerosis;Multiple myeloma;Transplant rejection;Diffuse large B-cell lymphoma;Liver cancer
T08391	JAK2	Successful target	D04BOW	Tricyclic pyrrolopyridine compound 1	Patented	Acquired hypomelanotic disorder;Atopic eczema;Myeloproliferative neoplasm;Pancreatic cancer;Rheumatoid arthritis;Thrombocytosis;Muscular dystrophy;Solid tumour/cancer;Alopecia;Asthma;B-cell lymphoma;Breast cancer;Lung cancer;Malignant haematopoietic neoplasm;Leukaemia;Multiple sclerosis;Multiple myeloma;Transplant rejection;Diffuse large B-cell lymphoma;Liver cancer
T08391	JAK2	Successful target	D04LKS	Ruxolitinib	Approved	Acquired hypomelanotic disorder;Atopic eczema;Myeloproliferative neoplasm;Pancreatic cancer;Rheumatoid arthritis;Thrombocytosis;Muscular dystrophy;Solid tumour/cancer;Alopecia;Asthma;B-cell lymphoma;Breast cancer;Lung cancer;Malignant haematopoietic neoplasm;Leukaemia;Multiple sclerosis;Multiple myeloma;Transplant rejection;Diffuse large B-cell lymphoma;Liver cancer
T08391	JAK2	Successful target	D04OCD	PMID27774822-Compound-Figure7Example63	Patented	Acquired hypomelanotic disorder;Atopic eczema;Myeloproliferative neoplasm;Pancreatic cancer;Rheumatoid arthritis;Thrombocytosis;Muscular dystrophy;Solid tumour/cancer;Alopecia;Asthma;B-cell lymphoma;Breast cancer;Lung cancer;Malignant haematopoietic neoplasm;Leukaemia;Multiple sclerosis;Multiple myeloma;Transplant rejection;Diffuse large B-cell lymphoma;Liver cancer
T08391	JAK2	Successful target	D05AJT	XL019	Phase 3	Acquired hypomelanotic disorder;Atopic eczema;Myeloproliferative neoplasm;Pancreatic cancer;Rheumatoid arthritis;Thrombocytosis;Muscular dystrophy;Solid tumour/cancer;Alopecia;Asthma;B-cell lymphoma;Breast cancer;Lung cancer;Malignant haematopoietic neoplasm;Leukaemia;Multiple sclerosis;Multiple myeloma;Transplant rejection;Diffuse large B-cell lymphoma;Liver cancer
T08391	JAK2	Successful target	D05AXE	Aminooxazole carboxamide derivative 1	Patented	Acquired hypomelanotic disorder;Atopic eczema;Myeloproliferative neoplasm;Pancreatic cancer;Rheumatoid arthritis;Thrombocytosis;Muscular dystrophy;Solid tumour/cancer;Alopecia;Asthma;B-cell lymphoma;Breast cancer;Lung cancer;Malignant haematopoietic neoplasm;Leukaemia;Multiple sclerosis;Multiple myeloma;Transplant rejection;Diffuse large B-cell lymphoma;Liver cancer
T08391	JAK2	Successful target	D05GEL	Cyclic cyanoethypypazole derivative 1	Patented	Acquired hypomelanotic disorder;Atopic eczema;Myeloproliferative neoplasm;Pancreatic cancer;Rheumatoid arthritis;Thrombocytosis;Muscular dystrophy;Solid tumour/cancer;Alopecia;Asthma;B-cell lymphoma;Breast cancer;Lung cancer;Malignant haematopoietic neoplasm;Leukaemia;Multiple sclerosis;Multiple myeloma;Transplant rejection;Diffuse large B-cell lymphoma;Liver cancer
T08391	JAK2	Successful target	D05MHL	Atropisomer 1	Investigative	Acquired hypomelanotic disorder;Atopic eczema;Myeloproliferative neoplasm;Pancreatic cancer;Rheumatoid arthritis;Thrombocytosis;Muscular dystrophy;Solid tumour/cancer;Alopecia;Asthma;B-cell lymphoma;Breast cancer;Lung cancer;Malignant haematopoietic neoplasm;Leukaemia;Multiple sclerosis;Multiple myeloma;Transplant rejection;Diffuse large B-cell lymphoma;Liver cancer
T08391	JAK2	Successful target	D05TSJ	LY2784544	Phase 2	Acquired hypomelanotic disorder;Atopic eczema;Myeloproliferative neoplasm;Pancreatic cancer;Rheumatoid arthritis;Thrombocytosis;Muscular dystrophy;Solid tumour/cancer;Alopecia;Asthma;B-cell lymphoma;Breast cancer;Lung cancer;Malignant haematopoietic neoplasm;Leukaemia;Multiple sclerosis;Multiple myeloma;Transplant rejection;Diffuse large B-cell lymphoma;Liver cancer
T08391	JAK2	Successful target	D06MQB	Pyrrolo-pyridone derivative 1	Patented	Acquired hypomelanotic disorder;Atopic eczema;Myeloproliferative neoplasm;Pancreatic cancer;Rheumatoid arthritis;Thrombocytosis;Muscular dystrophy;Solid tumour/cancer;Alopecia;Asthma;B-cell lymphoma;Breast cancer;Lung cancer;Malignant haematopoietic neoplasm;Leukaemia;Multiple sclerosis;Multiple myeloma;Transplant rejection;Diffuse large B-cell lymphoma;Liver cancer
T08391	JAK2	Successful target	D07XYI	1,2,4-triazolo[1,5a]pyridine derivative 1	Patented	Acquired hypomelanotic disorder;Atopic eczema;Myeloproliferative neoplasm;Pancreatic cancer;Rheumatoid arthritis;Thrombocytosis;Muscular dystrophy;Solid tumour/cancer;Alopecia;Asthma;B-cell lymphoma;Breast cancer;Lung cancer;Malignant haematopoietic neoplasm;Leukaemia;Multiple sclerosis;Multiple myeloma;Transplant rejection;Diffuse large B-cell lymphoma;Liver cancer
T08391	JAK2	Successful target	D08CNP	AC430	Phase 1	Acquired hypomelanotic disorder;Atopic eczema;Myeloproliferative neoplasm;Pancreatic cancer;Rheumatoid arthritis;Thrombocytosis;Muscular dystrophy;Solid tumour/cancer;Alopecia;Asthma;B-cell lymphoma;Breast cancer;Lung cancer;Malignant haematopoietic neoplasm;Leukaemia;Multiple sclerosis;Multiple myeloma;Transplant rejection;Diffuse large B-cell lymphoma;Liver cancer
T08391	JAK2	Successful target	D08WPB	Five-and-six-membered heterocyclic compound 1	Patented	Acquired hypomelanotic disorder;Atopic eczema;Myeloproliferative neoplasm;Pancreatic cancer;Rheumatoid arthritis;Thrombocytosis;Muscular dystrophy;Solid tumour/cancer;Alopecia;Asthma;B-cell lymphoma;Breast cancer;Lung cancer;Malignant haematopoietic neoplasm;Leukaemia;Multiple sclerosis;Multiple myeloma;Transplant rejection;Diffuse large B-cell lymphoma;Liver cancer
T08391	JAK2	Successful target	D09AFI	INCB039110	Phase 2	Acquired hypomelanotic disorder;Atopic eczema;Myeloproliferative neoplasm;Pancreatic cancer;Rheumatoid arthritis;Thrombocytosis;Muscular dystrophy;Solid tumour/cancer;Alopecia;Asthma;B-cell lymphoma;Breast cancer;Lung cancer;Malignant haematopoietic neoplasm;Leukaemia;Multiple sclerosis;Multiple myeloma;Transplant rejection;Diffuse large B-cell lymphoma;Liver cancer
T08391	JAK2	Successful target	D09ALF	Aminotriazolopyridine derivative 1	Patented	Acquired hypomelanotic disorder;Atopic eczema;Myeloproliferative neoplasm;Pancreatic cancer;Rheumatoid arthritis;Thrombocytosis;Muscular dystrophy;Solid tumour/cancer;Alopecia;Asthma;B-cell lymphoma;Breast cancer;Lung cancer;Malignant haematopoietic neoplasm;Leukaemia;Multiple sclerosis;Multiple myeloma;Transplant rejection;Diffuse large B-cell lymphoma;Liver cancer
T08391	JAK2	Successful target	D09PIS	Pyrazolo[4,3-c]pyridine derivative 2	Patented	Acquired hypomelanotic disorder;Atopic eczema;Myeloproliferative neoplasm;Pancreatic cancer;Rheumatoid arthritis;Thrombocytosis;Muscular dystrophy;Solid tumour/cancer;Alopecia;Asthma;B-cell lymphoma;Breast cancer;Lung cancer;Malignant haematopoietic neoplasm;Leukaemia;Multiple sclerosis;Multiple myeloma;Transplant rejection;Diffuse large B-cell lymphoma;Liver cancer
T08391	JAK2	Successful target	D09RTW	Aromatic bicyclic compound 6	Patented	Acquired hypomelanotic disorder;Atopic eczema;Myeloproliferative neoplasm;Pancreatic cancer;Rheumatoid arthritis;Thrombocytosis;Muscular dystrophy;Solid tumour/cancer;Alopecia;Asthma;B-cell lymphoma;Breast cancer;Lung cancer;Malignant haematopoietic neoplasm;Leukaemia;Multiple sclerosis;Multiple myeloma;Transplant rejection;Diffuse large B-cell lymphoma;Liver cancer
T08391	JAK2	Successful target	D09RUN	Pyrazolopyridine derivative 4	Patented	Acquired hypomelanotic disorder;Atopic eczema;Myeloproliferative neoplasm;Pancreatic cancer;Rheumatoid arthritis;Thrombocytosis;Muscular dystrophy;Solid tumour/cancer;Alopecia;Asthma;B-cell lymphoma;Breast cancer;Lung cancer;Malignant haematopoietic neoplasm;Leukaemia;Multiple sclerosis;Multiple myeloma;Transplant rejection;Diffuse large B-cell lymphoma;Liver cancer
T08391	JAK2	Successful target	D09UBE	Pyrrole six-membered heteroaryl ring derivative 1	Patented	Acquired hypomelanotic disorder;Atopic eczema;Myeloproliferative neoplasm;Pancreatic cancer;Rheumatoid arthritis;Thrombocytosis;Muscular dystrophy;Solid tumour/cancer;Alopecia;Asthma;B-cell lymphoma;Breast cancer;Lung cancer;Malignant haematopoietic neoplasm;Leukaemia;Multiple sclerosis;Multiple myeloma;Transplant rejection;Diffuse large B-cell lymphoma;Liver cancer
T08391	JAK2	Successful target	D09VZR	SGI-1252	Investigative	Acquired hypomelanotic disorder;Atopic eczema;Myeloproliferative neoplasm;Pancreatic cancer;Rheumatoid arthritis;Thrombocytosis;Muscular dystrophy;Solid tumour/cancer;Alopecia;Asthma;B-cell lymphoma;Breast cancer;Lung cancer;Malignant haematopoietic neoplasm;Leukaemia;Multiple sclerosis;Multiple myeloma;Transplant rejection;Diffuse large B-cell lymphoma;Liver cancer
T08391	JAK2	Successful target	D0A6RG	PMID27774824-Compound-Figure2Example4	Patented	Acquired hypomelanotic disorder;Atopic eczema;Myeloproliferative neoplasm;Pancreatic cancer;Rheumatoid arthritis;Thrombocytosis;Muscular dystrophy;Solid tumour/cancer;Alopecia;Asthma;B-cell lymphoma;Breast cancer;Lung cancer;Malignant haematopoietic neoplasm;Leukaemia;Multiple sclerosis;Multiple myeloma;Transplant rejection;Diffuse large B-cell lymphoma;Liver cancer
T08391	JAK2	Successful target	D0A7XQ	ON-044580	Investigative	Acquired hypomelanotic disorder;Atopic eczema;Myeloproliferative neoplasm;Pancreatic cancer;Rheumatoid arthritis;Thrombocytosis;Muscular dystrophy;Solid tumour/cancer;Alopecia;Asthma;B-cell lymphoma;Breast cancer;Lung cancer;Malignant haematopoietic neoplasm;Leukaemia;Multiple sclerosis;Multiple myeloma;Transplant rejection;Diffuse large B-cell lymphoma;Liver cancer
T08391	JAK2	Successful target	D0A8BV	PMID27774822-Compound-Figure10Compound12	Patented	Acquired hypomelanotic disorder;Atopic eczema;Myeloproliferative neoplasm;Pancreatic cancer;Rheumatoid arthritis;Thrombocytosis;Muscular dystrophy;Solid tumour/cancer;Alopecia;Asthma;B-cell lymphoma;Breast cancer;Lung cancer;Malignant haematopoietic neoplasm;Leukaemia;Multiple sclerosis;Multiple myeloma;Transplant rejection;Diffuse large B-cell lymphoma;Liver cancer
T08391	JAK2	Successful target	D0AE0M	PMID27774822-Compound-Figure10Compound4	Patented	Acquired hypomelanotic disorder;Atopic eczema;Myeloproliferative neoplasm;Pancreatic cancer;Rheumatoid arthritis;Thrombocytosis;Muscular dystrophy;Solid tumour/cancer;Alopecia;Asthma;B-cell lymphoma;Breast cancer;Lung cancer;Malignant haematopoietic neoplasm;Leukaemia;Multiple sclerosis;Multiple myeloma;Transplant rejection;Diffuse large B-cell lymphoma;Liver cancer
T08391	JAK2	Successful target	D0B9TH	PMID27774822-Compound-Figure8Example5	Patented	Acquired hypomelanotic disorder;Atopic eczema;Myeloproliferative neoplasm;Pancreatic cancer;Rheumatoid arthritis;Thrombocytosis;Muscular dystrophy;Solid tumour/cancer;Alopecia;Asthma;B-cell lymphoma;Breast cancer;Lung cancer;Malignant haematopoietic neoplasm;Leukaemia;Multiple sclerosis;Multiple myeloma;Transplant rejection;Diffuse large B-cell lymphoma;Liver cancer
T08391	JAK2	Successful target	D0BI3N	Cerdulatinib	Phase 2	Acquired hypomelanotic disorder;Atopic eczema;Myeloproliferative neoplasm;Pancreatic cancer;Rheumatoid arthritis;Thrombocytosis;Muscular dystrophy;Solid tumour/cancer;Alopecia;Asthma;B-cell lymphoma;Breast cancer;Lung cancer;Malignant haematopoietic neoplasm;Leukaemia;Multiple sclerosis;Multiple myeloma;Transplant rejection;Diffuse large B-cell lymphoma;Liver cancer
T08391	JAK2	Successful target	D0CD6Y	Pyrimidopyridazinone derivative 1	Patented	Acquired hypomelanotic disorder;Atopic eczema;Myeloproliferative neoplasm;Pancreatic cancer;Rheumatoid arthritis;Thrombocytosis;Muscular dystrophy;Solid tumour/cancer;Alopecia;Asthma;B-cell lymphoma;Breast cancer;Lung cancer;Malignant haematopoietic neoplasm;Leukaemia;Multiple sclerosis;Multiple myeloma;Transplant rejection;Diffuse large B-cell lymphoma;Liver cancer
T08391	JAK2	Successful target	D0D1QH	Pyrazolopyridine derivative 7	Patented	Acquired hypomelanotic disorder;Atopic eczema;Myeloproliferative neoplasm;Pancreatic cancer;Rheumatoid arthritis;Thrombocytosis;Muscular dystrophy;Solid tumour/cancer;Alopecia;Asthma;B-cell lymphoma;Breast cancer;Lung cancer;Malignant haematopoietic neoplasm;Leukaemia;Multiple sclerosis;Multiple myeloma;Transplant rejection;Diffuse large B-cell lymphoma;Liver cancer
T08391	JAK2	Successful target	D0D5ZJ	Momelotinib	Phase 3	Acquired hypomelanotic disorder;Atopic eczema;Myeloproliferative neoplasm;Pancreatic cancer;Rheumatoid arthritis;Thrombocytosis;Muscular dystrophy;Solid tumour/cancer;Alopecia;Asthma;B-cell lymphoma;Breast cancer;Lung cancer;Malignant haematopoietic neoplasm;Leukaemia;Multiple sclerosis;Multiple myeloma;Transplant rejection;Diffuse large B-cell lymphoma;Liver cancer
T08391	JAK2	Successful target	D0DK8X	BMS-911543	Phase 2	Acquired hypomelanotic disorder;Atopic eczema;Myeloproliferative neoplasm;Pancreatic cancer;Rheumatoid arthritis;Thrombocytosis;Muscular dystrophy;Solid tumour/cancer;Alopecia;Asthma;B-cell lymphoma;Breast cancer;Lung cancer;Malignant haematopoietic neoplasm;Leukaemia;Multiple sclerosis;Multiple myeloma;Transplant rejection;Diffuse large B-cell lymphoma;Liver cancer
T08391	JAK2	Successful target	D0E2WK	PMID27774822-Compound-Figure2Example1-1left	Patented	Acquired hypomelanotic disorder;Atopic eczema;Myeloproliferative neoplasm;Pancreatic cancer;Rheumatoid arthritis;Thrombocytosis;Muscular dystrophy;Solid tumour/cancer;Alopecia;Asthma;B-cell lymphoma;Breast cancer;Lung cancer;Malignant haematopoietic neoplasm;Leukaemia;Multiple sclerosis;Multiple myeloma;Transplant rejection;Diffuse large B-cell lymphoma;Liver cancer
T08391	JAK2	Successful target	D0E5IP	WHI-P154	Investigative	Acquired hypomelanotic disorder;Atopic eczema;Myeloproliferative neoplasm;Pancreatic cancer;Rheumatoid arthritis;Thrombocytosis;Muscular dystrophy;Solid tumour/cancer;Alopecia;Asthma;B-cell lymphoma;Breast cancer;Lung cancer;Malignant haematopoietic neoplasm;Leukaemia;Multiple sclerosis;Multiple myeloma;Transplant rejection;Diffuse large B-cell lymphoma;Liver cancer
T08391	JAK2	Successful target	D0F3BK	PMID27774824-Compound-Figure6Example6	Patented	Acquired hypomelanotic disorder;Atopic eczema;Myeloproliferative neoplasm;Pancreatic cancer;Rheumatoid arthritis;Thrombocytosis;Muscular dystrophy;Solid tumour/cancer;Alopecia;Asthma;B-cell lymphoma;Breast cancer;Lung cancer;Malignant haematopoietic neoplasm;Leukaemia;Multiple sclerosis;Multiple myeloma;Transplant rejection;Diffuse large B-cell lymphoma;Liver cancer
T08391	JAK2	Successful target	D0FQ4Z	Pyrrolo[2,3-d]pyrimidine derivative 6	Patented	Acquired hypomelanotic disorder;Atopic eczema;Myeloproliferative neoplasm;Pancreatic cancer;Rheumatoid arthritis;Thrombocytosis;Muscular dystrophy;Solid tumour/cancer;Alopecia;Asthma;B-cell lymphoma;Breast cancer;Lung cancer;Malignant haematopoietic neoplasm;Leukaemia;Multiple sclerosis;Multiple myeloma;Transplant rejection;Diffuse large B-cell lymphoma;Liver cancer
T08391	JAK2	Successful target	D0G0FK	Tricyclic compound 1	Patented	Acquired hypomelanotic disorder;Atopic eczema;Myeloproliferative neoplasm;Pancreatic cancer;Rheumatoid arthritis;Thrombocytosis;Muscular dystrophy;Solid tumour/cancer;Alopecia;Asthma;B-cell lymphoma;Breast cancer;Lung cancer;Malignant haematopoietic neoplasm;Leukaemia;Multiple sclerosis;Multiple myeloma;Transplant rejection;Diffuse large B-cell lymphoma;Liver cancer
T08391	JAK2	Successful target	D0G8BM	Fedratinib	Approved	Acquired hypomelanotic disorder;Atopic eczema;Myeloproliferative neoplasm;Pancreatic cancer;Rheumatoid arthritis;Thrombocytosis;Muscular dystrophy;Solid tumour/cancer;Alopecia;Asthma;B-cell lymphoma;Breast cancer;Lung cancer;Malignant haematopoietic neoplasm;Leukaemia;Multiple sclerosis;Multiple myeloma;Transplant rejection;Diffuse large B-cell lymphoma;Liver cancer
T08391	JAK2	Successful target	D0G9MM	Isoxazole derivative 1	Patented	Acquired hypomelanotic disorder;Atopic eczema;Myeloproliferative neoplasm;Pancreatic cancer;Rheumatoid arthritis;Thrombocytosis;Muscular dystrophy;Solid tumour/cancer;Alopecia;Asthma;B-cell lymphoma;Breast cancer;Lung cancer;Malignant haematopoietic neoplasm;Leukaemia;Multiple sclerosis;Multiple myeloma;Transplant rejection;Diffuse large B-cell lymphoma;Liver cancer
T08391	JAK2	Successful target	D0GB7G	PMID27774824-Compound-Figure6Example12	Patented	Acquired hypomelanotic disorder;Atopic eczema;Myeloproliferative neoplasm;Pancreatic cancer;Rheumatoid arthritis;Thrombocytosis;Muscular dystrophy;Solid tumour/cancer;Alopecia;Asthma;B-cell lymphoma;Breast cancer;Lung cancer;Malignant haematopoietic neoplasm;Leukaemia;Multiple sclerosis;Multiple myeloma;Transplant rejection;Diffuse large B-cell lymphoma;Liver cancer
T08391	JAK2	Successful target	D0GH3Q	ITF2357	Phase 3	Acquired hypomelanotic disorder;Atopic eczema;Myeloproliferative neoplasm;Pancreatic cancer;Rheumatoid arthritis;Thrombocytosis;Muscular dystrophy;Solid tumour/cancer;Alopecia;Asthma;B-cell lymphoma;Breast cancer;Lung cancer;Malignant haematopoietic neoplasm;Leukaemia;Multiple sclerosis;Multiple myeloma;Transplant rejection;Diffuse large B-cell lymphoma;Liver cancer
T08391	JAK2	Successful target	D0GH8D	PMID27774822-Compound-Figure10Example1	Patented	Acquired hypomelanotic disorder;Atopic eczema;Myeloproliferative neoplasm;Pancreatic cancer;Rheumatoid arthritis;Thrombocytosis;Muscular dystrophy;Solid tumour/cancer;Alopecia;Asthma;B-cell lymphoma;Breast cancer;Lung cancer;Malignant haematopoietic neoplasm;Leukaemia;Multiple sclerosis;Multiple myeloma;Transplant rejection;Diffuse large B-cell lymphoma;Liver cancer
T08391	JAK2	Successful target	D0H6XN	Geminally-substituted cyanoethylpypazolo pyridone derivative 1	Patented	Acquired hypomelanotic disorder;Atopic eczema;Myeloproliferative neoplasm;Pancreatic cancer;Rheumatoid arthritis;Thrombocytosis;Muscular dystrophy;Solid tumour/cancer;Alopecia;Asthma;B-cell lymphoma;Breast cancer;Lung cancer;Malignant haematopoietic neoplasm;Leukaemia;Multiple sclerosis;Multiple myeloma;Transplant rejection;Diffuse large B-cell lymphoma;Liver cancer
T08391	JAK2	Successful target	D0HS2J	PMID27774824-Compound-Figure8Example99	Patented	Acquired hypomelanotic disorder;Atopic eczema;Myeloproliferative neoplasm;Pancreatic cancer;Rheumatoid arthritis;Thrombocytosis;Muscular dystrophy;Solid tumour/cancer;Alopecia;Asthma;B-cell lymphoma;Breast cancer;Lung cancer;Malignant haematopoietic neoplasm;Leukaemia;Multiple sclerosis;Multiple myeloma;Transplant rejection;Diffuse large B-cell lymphoma;Liver cancer
T08391	JAK2	Successful target	D0I3EY	5-phenyl-1H-indazol-3-amine	Investigative	Acquired hypomelanotic disorder;Atopic eczema;Myeloproliferative neoplasm;Pancreatic cancer;Rheumatoid arthritis;Thrombocytosis;Muscular dystrophy;Solid tumour/cancer;Alopecia;Asthma;B-cell lymphoma;Breast cancer;Lung cancer;Malignant haematopoietic neoplasm;Leukaemia;Multiple sclerosis;Multiple myeloma;Transplant rejection;Diffuse large B-cell lymphoma;Liver cancer
T08391	JAK2	Successful target	D0I6QN	K-454	Investigative	Acquired hypomelanotic disorder;Atopic eczema;Myeloproliferative neoplasm;Pancreatic cancer;Rheumatoid arthritis;Thrombocytosis;Muscular dystrophy;Solid tumour/cancer;Alopecia;Asthma;B-cell lymphoma;Breast cancer;Lung cancer;Malignant haematopoietic neoplasm;Leukaemia;Multiple sclerosis;Multiple myeloma;Transplant rejection;Diffuse large B-cell lymphoma;Liver cancer
T08391	JAK2	Successful target	D0IC8O	Curcumin analog 2	Patented	Acquired hypomelanotic disorder;Atopic eczema;Myeloproliferative neoplasm;Pancreatic cancer;Rheumatoid arthritis;Thrombocytosis;Muscular dystrophy;Solid tumour/cancer;Alopecia;Asthma;B-cell lymphoma;Breast cancer;Lung cancer;Malignant haematopoietic neoplasm;Leukaemia;Multiple sclerosis;Multiple myeloma;Transplant rejection;Diffuse large B-cell lymphoma;Liver cancer
T08391	JAK2	Successful target	D0IQ6G	PMID27774822-Compound-Figure2Example1-1right	Patented	Acquired hypomelanotic disorder;Atopic eczema;Myeloproliferative neoplasm;Pancreatic cancer;Rheumatoid arthritis;Thrombocytosis;Muscular dystrophy;Solid tumour/cancer;Alopecia;Asthma;B-cell lymphoma;Breast cancer;Lung cancer;Malignant haematopoietic neoplasm;Leukaemia;Multiple sclerosis;Multiple myeloma;Transplant rejection;Diffuse large B-cell lymphoma;Liver cancer
T08391	JAK2	Successful target	D0IR6U	CMP-6	Investigative	Acquired hypomelanotic disorder;Atopic eczema;Myeloproliferative neoplasm;Pancreatic cancer;Rheumatoid arthritis;Thrombocytosis;Muscular dystrophy;Solid tumour/cancer;Alopecia;Asthma;B-cell lymphoma;Breast cancer;Lung cancer;Malignant haematopoietic neoplasm;Leukaemia;Multiple sclerosis;Multiple myeloma;Transplant rejection;Diffuse large B-cell lymphoma;Liver cancer
T08391	JAK2	Successful target	D0JZ2B	Alkynyl-substituted pyrimidinyl-pyrrole derivative 1	Patented	Acquired hypomelanotic disorder;Atopic eczema;Myeloproliferative neoplasm;Pancreatic cancer;Rheumatoid arthritis;Thrombocytosis;Muscular dystrophy;Solid tumour/cancer;Alopecia;Asthma;B-cell lymphoma;Breast cancer;Lung cancer;Malignant haematopoietic neoplasm;Leukaemia;Multiple sclerosis;Multiple myeloma;Transplant rejection;Diffuse large B-cell lymphoma;Liver cancer
T08391	JAK2	Successful target	D0K2RW	Cyanomethyl pypazole carboxamide derivative 1	Patented	Acquired hypomelanotic disorder;Atopic eczema;Myeloproliferative neoplasm;Pancreatic cancer;Rheumatoid arthritis;Thrombocytosis;Muscular dystrophy;Solid tumour/cancer;Alopecia;Asthma;B-cell lymphoma;Breast cancer;Lung cancer;Malignant haematopoietic neoplasm;Leukaemia;Multiple sclerosis;Multiple myeloma;Transplant rejection;Diffuse large B-cell lymphoma;Liver cancer
T08391	JAK2	Successful target	D0KF8H	PMID27774824-Compound-Figure8Example22	Patented	Acquired hypomelanotic disorder;Atopic eczema;Myeloproliferative neoplasm;Pancreatic cancer;Rheumatoid arthritis;Thrombocytosis;Muscular dystrophy;Solid tumour/cancer;Alopecia;Asthma;B-cell lymphoma;Breast cancer;Lung cancer;Malignant haematopoietic neoplasm;Leukaemia;Multiple sclerosis;Multiple myeloma;Transplant rejection;Diffuse large B-cell lymphoma;Liver cancer
T08391	JAK2	Successful target	D0KI5F	Geminally-substituted cyanoethylpypazolo pyridone derivative 2	Patented	Acquired hypomelanotic disorder;Atopic eczema;Myeloproliferative neoplasm;Pancreatic cancer;Rheumatoid arthritis;Thrombocytosis;Muscular dystrophy;Solid tumour/cancer;Alopecia;Asthma;B-cell lymphoma;Breast cancer;Lung cancer;Malignant haematopoietic neoplasm;Leukaemia;Multiple sclerosis;Multiple myeloma;Transplant rejection;Diffuse large B-cell lymphoma;Liver cancer
T08391	JAK2	Successful target	D0KL3B	Pyrrolo[2,3-d]pyrimidine derivative 8	Patented	Acquired hypomelanotic disorder;Atopic eczema;Myeloproliferative neoplasm;Pancreatic cancer;Rheumatoid arthritis;Thrombocytosis;Muscular dystrophy;Solid tumour/cancer;Alopecia;Asthma;B-cell lymphoma;Breast cancer;Lung cancer;Malignant haematopoietic neoplasm;Leukaemia;Multiple sclerosis;Multiple myeloma;Transplant rejection;Diffuse large B-cell lymphoma;Liver cancer
T08391	JAK2	Successful target	D0LR6J	Bis-aminopyrimidine derivative 2	Patented	Acquired hypomelanotic disorder;Atopic eczema;Myeloproliferative neoplasm;Pancreatic cancer;Rheumatoid arthritis;Thrombocytosis;Muscular dystrophy;Solid tumour/cancer;Alopecia;Asthma;B-cell lymphoma;Breast cancer;Lung cancer;Malignant haematopoietic neoplasm;Leukaemia;Multiple sclerosis;Multiple myeloma;Transplant rejection;Diffuse large B-cell lymphoma;Liver cancer
T08391	JAK2	Successful target	D0LS1O	Tricyclic compound 11	Patented	Acquired hypomelanotic disorder;Atopic eczema;Myeloproliferative neoplasm;Pancreatic cancer;Rheumatoid arthritis;Thrombocytosis;Muscular dystrophy;Solid tumour/cancer;Alopecia;Asthma;B-cell lymphoma;Breast cancer;Lung cancer;Malignant haematopoietic neoplasm;Leukaemia;Multiple sclerosis;Multiple myeloma;Transplant rejection;Diffuse large B-cell lymphoma;Liver cancer
T08391	JAK2	Successful target	D0M2OK	Bis-aminopyrimidine derivative 5	Patented	Acquired hypomelanotic disorder;Atopic eczema;Myeloproliferative neoplasm;Pancreatic cancer;Rheumatoid arthritis;Thrombocytosis;Muscular dystrophy;Solid tumour/cancer;Alopecia;Asthma;B-cell lymphoma;Breast cancer;Lung cancer;Malignant haematopoietic neoplasm;Leukaemia;Multiple sclerosis;Multiple myeloma;Transplant rejection;Diffuse large B-cell lymphoma;Liver cancer
T08391	JAK2	Successful target	D0M2WA	Tricyclic heterocycle derivative 5	Patented	Acquired hypomelanotic disorder;Atopic eczema;Myeloproliferative neoplasm;Pancreatic cancer;Rheumatoid arthritis;Thrombocytosis;Muscular dystrophy;Solid tumour/cancer;Alopecia;Asthma;B-cell lymphoma;Breast cancer;Lung cancer;Malignant haematopoietic neoplasm;Leukaemia;Multiple sclerosis;Multiple myeloma;Transplant rejection;Diffuse large B-cell lymphoma;Liver cancer
T08391	JAK2	Successful target	D0M3CB	PMID27774822-Compound-Figure1Example20	Patented	Acquired hypomelanotic disorder;Atopic eczema;Myeloproliferative neoplasm;Pancreatic cancer;Rheumatoid arthritis;Thrombocytosis;Muscular dystrophy;Solid tumour/cancer;Alopecia;Asthma;B-cell lymphoma;Breast cancer;Lung cancer;Malignant haematopoietic neoplasm;Leukaemia;Multiple sclerosis;Multiple myeloma;Transplant rejection;Diffuse large B-cell lymphoma;Liver cancer
T08391	JAK2	Successful target	D0M5AG	Aromatic bicyclic compound 3	Patented	Acquired hypomelanotic disorder;Atopic eczema;Myeloproliferative neoplasm;Pancreatic cancer;Rheumatoid arthritis;Thrombocytosis;Muscular dystrophy;Solid tumour/cancer;Alopecia;Asthma;B-cell lymphoma;Breast cancer;Lung cancer;Malignant haematopoietic neoplasm;Leukaemia;Multiple sclerosis;Multiple myeloma;Transplant rejection;Diffuse large B-cell lymphoma;Liver cancer
T08391	JAK2	Successful target	D0M9YZ	Aromatic bicyclic compound 4	Patented	Acquired hypomelanotic disorder;Atopic eczema;Myeloproliferative neoplasm;Pancreatic cancer;Rheumatoid arthritis;Thrombocytosis;Muscular dystrophy;Solid tumour/cancer;Alopecia;Asthma;B-cell lymphoma;Breast cancer;Lung cancer;Malignant haematopoietic neoplasm;Leukaemia;Multiple sclerosis;Multiple myeloma;Transplant rejection;Diffuse large B-cell lymphoma;Liver cancer
T08391	JAK2	Successful target	D0MP0X	AZD1480	Phase 2	Acquired hypomelanotic disorder;Atopic eczema;Myeloproliferative neoplasm;Pancreatic cancer;Rheumatoid arthritis;Thrombocytosis;Muscular dystrophy;Solid tumour/cancer;Alopecia;Asthma;B-cell lymphoma;Breast cancer;Lung cancer;Malignant haematopoietic neoplasm;Leukaemia;Multiple sclerosis;Multiple myeloma;Transplant rejection;Diffuse large B-cell lymphoma;Liver cancer
T08391	JAK2	Successful target	D0N8CN	BVB-808	Investigative	Acquired hypomelanotic disorder;Atopic eczema;Myeloproliferative neoplasm;Pancreatic cancer;Rheumatoid arthritis;Thrombocytosis;Muscular dystrophy;Solid tumour/cancer;Alopecia;Asthma;B-cell lymphoma;Breast cancer;Lung cancer;Malignant haematopoietic neoplasm;Leukaemia;Multiple sclerosis;Multiple myeloma;Transplant rejection;Diffuse large B-cell lymphoma;Liver cancer
T08391	JAK2	Successful target	D0NP2W	1,2,4-triazolo[1,5a]pyridine derivative 2	Patented	Acquired hypomelanotic disorder;Atopic eczema;Myeloproliferative neoplasm;Pancreatic cancer;Rheumatoid arthritis;Thrombocytosis;Muscular dystrophy;Solid tumour/cancer;Alopecia;Asthma;B-cell lymphoma;Breast cancer;Lung cancer;Malignant haematopoietic neoplasm;Leukaemia;Multiple sclerosis;Multiple myeloma;Transplant rejection;Diffuse large B-cell lymphoma;Liver cancer
T08391	JAK2	Successful target	D0NY6M	PMID27774822-Compound-Figure3CompoundI-165	Patented	Acquired hypomelanotic disorder;Atopic eczema;Myeloproliferative neoplasm;Pancreatic cancer;Rheumatoid arthritis;Thrombocytosis;Muscular dystrophy;Solid tumour/cancer;Alopecia;Asthma;B-cell lymphoma;Breast cancer;Lung cancer;Malignant haematopoietic neoplasm;Leukaemia;Multiple sclerosis;Multiple myeloma;Transplant rejection;Diffuse large B-cell lymphoma;Liver cancer
T08391	JAK2	Successful target	D0OP3D	AZ960	Investigative	Acquired hypomelanotic disorder;Atopic eczema;Myeloproliferative neoplasm;Pancreatic cancer;Rheumatoid arthritis;Thrombocytosis;Muscular dystrophy;Solid tumour/cancer;Alopecia;Asthma;B-cell lymphoma;Breast cancer;Lung cancer;Malignant haematopoietic neoplasm;Leukaemia;Multiple sclerosis;Multiple myeloma;Transplant rejection;Diffuse large B-cell lymphoma;Liver cancer
T08391	JAK2	Successful target	D0PB5X	Cycloalkyl nitrile pyrazolo pyridone derivative 1	Patented	Acquired hypomelanotic disorder;Atopic eczema;Myeloproliferative neoplasm;Pancreatic cancer;Rheumatoid arthritis;Thrombocytosis;Muscular dystrophy;Solid tumour/cancer;Alopecia;Asthma;B-cell lymphoma;Breast cancer;Lung cancer;Malignant haematopoietic neoplasm;Leukaemia;Multiple sclerosis;Multiple myeloma;Transplant rejection;Diffuse large B-cell lymphoma;Liver cancer
T08391	JAK2	Successful target	D0PM8K	PMID27774824-Compound-Figure7Example10	Patented	Acquired hypomelanotic disorder;Atopic eczema;Myeloproliferative neoplasm;Pancreatic cancer;Rheumatoid arthritis;Thrombocytosis;Muscular dystrophy;Solid tumour/cancer;Alopecia;Asthma;B-cell lymphoma;Breast cancer;Lung cancer;Malignant haematopoietic neoplasm;Leukaemia;Multiple sclerosis;Multiple myeloma;Transplant rejection;Diffuse large B-cell lymphoma;Liver cancer
T08391	JAK2	Successful target	D0PN8H	Pacritinib	Phase 3	Acquired hypomelanotic disorder;Atopic eczema;Myeloproliferative neoplasm;Pancreatic cancer;Rheumatoid arthritis;Thrombocytosis;Muscular dystrophy;Solid tumour/cancer;Alopecia;Asthma;B-cell lymphoma;Breast cancer;Lung cancer;Malignant haematopoietic neoplasm;Leukaemia;Multiple sclerosis;Multiple myeloma;Transplant rejection;Diffuse large B-cell lymphoma;Liver cancer
T08391	JAK2	Successful target	D0Q5JV	Aromatic bicyclic compound 5	Patented	Acquired hypomelanotic disorder;Atopic eczema;Myeloproliferative neoplasm;Pancreatic cancer;Rheumatoid arthritis;Thrombocytosis;Muscular dystrophy;Solid tumour/cancer;Alopecia;Asthma;B-cell lymphoma;Breast cancer;Lung cancer;Malignant haematopoietic neoplasm;Leukaemia;Multiple sclerosis;Multiple myeloma;Transplant rejection;Diffuse large B-cell lymphoma;Liver cancer
T08391	JAK2	Successful target	D0QD5Y	Aromatic bicyclic compound 1	Patented	Acquired hypomelanotic disorder;Atopic eczema;Myeloproliferative neoplasm;Pancreatic cancer;Rheumatoid arthritis;Thrombocytosis;Muscular dystrophy;Solid tumour/cancer;Alopecia;Asthma;B-cell lymphoma;Breast cancer;Lung cancer;Malignant haematopoietic neoplasm;Leukaemia;Multiple sclerosis;Multiple myeloma;Transplant rejection;Diffuse large B-cell lymphoma;Liver cancer
T08391	JAK2	Successful target	D0RJ3W	PMID27774822-Compound-Figure11Example5	Patented	Acquired hypomelanotic disorder;Atopic eczema;Myeloproliferative neoplasm;Pancreatic cancer;Rheumatoid arthritis;Thrombocytosis;Muscular dystrophy;Solid tumour/cancer;Alopecia;Asthma;B-cell lymphoma;Breast cancer;Lung cancer;Malignant haematopoietic neoplasm;Leukaemia;Multiple sclerosis;Multiple myeloma;Transplant rejection;Diffuse large B-cell lymphoma;Liver cancer
T08391	JAK2	Successful target	D0S0NX	Peginterferon beta	Phase 1	Acquired hypomelanotic disorder;Atopic eczema;Myeloproliferative neoplasm;Pancreatic cancer;Rheumatoid arthritis;Thrombocytosis;Muscular dystrophy;Solid tumour/cancer;Alopecia;Asthma;B-cell lymphoma;Breast cancer;Lung cancer;Malignant haematopoietic neoplasm;Leukaemia;Multiple sclerosis;Multiple myeloma;Transplant rejection;Diffuse large B-cell lymphoma;Liver cancer
T08391	JAK2	Successful target	D0S4TH	Cycloalkyl nitrile pyrazolo pyridone derivative 2	Patented	Acquired hypomelanotic disorder;Atopic eczema;Myeloproliferative neoplasm;Pancreatic cancer;Rheumatoid arthritis;Thrombocytosis;Muscular dystrophy;Solid tumour/cancer;Alopecia;Asthma;B-cell lymphoma;Breast cancer;Lung cancer;Malignant haematopoietic neoplasm;Leukaemia;Multiple sclerosis;Multiple myeloma;Transplant rejection;Diffuse large B-cell lymphoma;Liver cancer
T08391	JAK2	Successful target	D0S6XT	Bis-aminopyrimidine derivative 3	Patented	Acquired hypomelanotic disorder;Atopic eczema;Myeloproliferative neoplasm;Pancreatic cancer;Rheumatoid arthritis;Thrombocytosis;Muscular dystrophy;Solid tumour/cancer;Alopecia;Asthma;B-cell lymphoma;Breast cancer;Lung cancer;Malignant haematopoietic neoplasm;Leukaemia;Multiple sclerosis;Multiple myeloma;Transplant rejection;Diffuse large B-cell lymphoma;Liver cancer
T08391	JAK2	Successful target	D0SJ1Q	Bis-aminopyrimidine derivative 4	Patented	Acquired hypomelanotic disorder;Atopic eczema;Myeloproliferative neoplasm;Pancreatic cancer;Rheumatoid arthritis;Thrombocytosis;Muscular dystrophy;Solid tumour/cancer;Alopecia;Asthma;B-cell lymphoma;Breast cancer;Lung cancer;Malignant haematopoietic neoplasm;Leukaemia;Multiple sclerosis;Multiple myeloma;Transplant rejection;Diffuse large B-cell lymphoma;Liver cancer
T08391	JAK2	Successful target	D0TX2G	Isoxazole derivative 2	Patented	Acquired hypomelanotic disorder;Atopic eczema;Myeloproliferative neoplasm;Pancreatic cancer;Rheumatoid arthritis;Thrombocytosis;Muscular dystrophy;Solid tumour/cancer;Alopecia;Asthma;B-cell lymphoma;Breast cancer;Lung cancer;Malignant haematopoietic neoplasm;Leukaemia;Multiple sclerosis;Multiple myeloma;Transplant rejection;Diffuse large B-cell lymphoma;Liver cancer
T08391	JAK2	Successful target	D0U1HA	PMID27774824-Compound-Figure3Example18	Patented	Acquired hypomelanotic disorder;Atopic eczema;Myeloproliferative neoplasm;Pancreatic cancer;Rheumatoid arthritis;Thrombocytosis;Muscular dystrophy;Solid tumour/cancer;Alopecia;Asthma;B-cell lymphoma;Breast cancer;Lung cancer;Malignant haematopoietic neoplasm;Leukaemia;Multiple sclerosis;Multiple myeloma;Transplant rejection;Diffuse large B-cell lymphoma;Liver cancer
T08391	JAK2	Successful target	D0U5FZ	Pyrrolo[2,3-d]pyrimidine derivative 7	Patented	Acquired hypomelanotic disorder;Atopic eczema;Myeloproliferative neoplasm;Pancreatic cancer;Rheumatoid arthritis;Thrombocytosis;Muscular dystrophy;Solid tumour/cancer;Alopecia;Asthma;B-cell lymphoma;Breast cancer;Lung cancer;Malignant haematopoietic neoplasm;Leukaemia;Multiple sclerosis;Multiple myeloma;Transplant rejection;Diffuse large B-cell lymphoma;Liver cancer
T08391	JAK2	Successful target	D0US9O	PMID24359159C19a	Investigative	Acquired hypomelanotic disorder;Atopic eczema;Myeloproliferative neoplasm;Pancreatic cancer;Rheumatoid arthritis;Thrombocytosis;Muscular dystrophy;Solid tumour/cancer;Alopecia;Asthma;B-cell lymphoma;Breast cancer;Lung cancer;Malignant haematopoietic neoplasm;Leukaemia;Multiple sclerosis;Multiple myeloma;Transplant rejection;Diffuse large B-cell lymphoma;Liver cancer
T08391	JAK2	Successful target	D0V0KI	Cycloalkyl nitrile pyrazole carboxamide derivative 1	Patented	Acquired hypomelanotic disorder;Atopic eczema;Myeloproliferative neoplasm;Pancreatic cancer;Rheumatoid arthritis;Thrombocytosis;Muscular dystrophy;Solid tumour/cancer;Alopecia;Asthma;B-cell lymphoma;Breast cancer;Lung cancer;Malignant haematopoietic neoplasm;Leukaemia;Multiple sclerosis;Multiple myeloma;Transplant rejection;Diffuse large B-cell lymphoma;Liver cancer
T08391	JAK2	Successful target	D0VI7E	Aromatic bicyclic compound 2	Patented	Acquired hypomelanotic disorder;Atopic eczema;Myeloproliferative neoplasm;Pancreatic cancer;Rheumatoid arthritis;Thrombocytosis;Muscular dystrophy;Solid tumour/cancer;Alopecia;Asthma;B-cell lymphoma;Breast cancer;Lung cancer;Malignant haematopoietic neoplasm;Leukaemia;Multiple sclerosis;Multiple myeloma;Transplant rejection;Diffuse large B-cell lymphoma;Liver cancer
T08391	JAK2	Successful target	D0VJ1R	Imidazo[4,5-c]pyridine derivative 2	Patented	Acquired hypomelanotic disorder;Atopic eczema;Myeloproliferative neoplasm;Pancreatic cancer;Rheumatoid arthritis;Thrombocytosis;Muscular dystrophy;Solid tumour/cancer;Alopecia;Asthma;B-cell lymphoma;Breast cancer;Lung cancer;Malignant haematopoietic neoplasm;Leukaemia;Multiple sclerosis;Multiple myeloma;Transplant rejection;Diffuse large B-cell lymphoma;Liver cancer
T08391	JAK2	Successful target	D0VQ7P	Pyrrolo[2,3-d]pyrimidine derivative 11	Patented	Acquired hypomelanotic disorder;Atopic eczema;Myeloproliferative neoplasm;Pancreatic cancer;Rheumatoid arthritis;Thrombocytosis;Muscular dystrophy;Solid tumour/cancer;Alopecia;Asthma;B-cell lymphoma;Breast cancer;Lung cancer;Malignant haematopoietic neoplasm;Leukaemia;Multiple sclerosis;Multiple myeloma;Transplant rejection;Diffuse large B-cell lymphoma;Liver cancer
T08391	JAK2	Successful target	D0VR6E	Pyrrolo-pyridine derivative 3	Patented	Acquired hypomelanotic disorder;Atopic eczema;Myeloproliferative neoplasm;Pancreatic cancer;Rheumatoid arthritis;Thrombocytosis;Muscular dystrophy;Solid tumour/cancer;Alopecia;Asthma;B-cell lymphoma;Breast cancer;Lung cancer;Malignant haematopoietic neoplasm;Leukaemia;Multiple sclerosis;Multiple myeloma;Transplant rejection;Diffuse large B-cell lymphoma;Liver cancer
T08391	JAK2	Successful target	D0W8DN	PMID27774822-Compound-Figure10Example19	Patented	Acquired hypomelanotic disorder;Atopic eczema;Myeloproliferative neoplasm;Pancreatic cancer;Rheumatoid arthritis;Thrombocytosis;Muscular dystrophy;Solid tumour/cancer;Alopecia;Asthma;B-cell lymphoma;Breast cancer;Lung cancer;Malignant haematopoietic neoplasm;Leukaemia;Multiple sclerosis;Multiple myeloma;Transplant rejection;Diffuse large B-cell lymphoma;Liver cancer
T08391	JAK2	Successful target	D0WA1V	Pyrimidopyridazinone derivative 2	Patented	Acquired hypomelanotic disorder;Atopic eczema;Myeloproliferative neoplasm;Pancreatic cancer;Rheumatoid arthritis;Thrombocytosis;Muscular dystrophy;Solid tumour/cancer;Alopecia;Asthma;B-cell lymphoma;Breast cancer;Lung cancer;Malignant haematopoietic neoplasm;Leukaemia;Multiple sclerosis;Multiple myeloma;Transplant rejection;Diffuse large B-cell lymphoma;Liver cancer
T08391	JAK2	Successful target	D0WD1Z	Curcumin analog 1	Patented	Acquired hypomelanotic disorder;Atopic eczema;Myeloproliferative neoplasm;Pancreatic cancer;Rheumatoid arthritis;Thrombocytosis;Muscular dystrophy;Solid tumour/cancer;Alopecia;Asthma;B-cell lymphoma;Breast cancer;Lung cancer;Malignant haematopoietic neoplasm;Leukaemia;Multiple sclerosis;Multiple myeloma;Transplant rejection;Diffuse large B-cell lymphoma;Liver cancer
T08391	JAK2	Successful target	D0WZ8N	PMID27774824-Compound-Figure9Example2up	Patented	Acquired hypomelanotic disorder;Atopic eczema;Myeloproliferative neoplasm;Pancreatic cancer;Rheumatoid arthritis;Thrombocytosis;Muscular dystrophy;Solid tumour/cancer;Alopecia;Asthma;B-cell lymphoma;Breast cancer;Lung cancer;Malignant haematopoietic neoplasm;Leukaemia;Multiple sclerosis;Multiple myeloma;Transplant rejection;Diffuse large B-cell lymphoma;Liver cancer
T08391	JAK2	Successful target	D0X1FD	Tricyclic heterocycle derivative 1	Patented	Acquired hypomelanotic disorder;Atopic eczema;Myeloproliferative neoplasm;Pancreatic cancer;Rheumatoid arthritis;Thrombocytosis;Muscular dystrophy;Solid tumour/cancer;Alopecia;Asthma;B-cell lymphoma;Breast cancer;Lung cancer;Malignant haematopoietic neoplasm;Leukaemia;Multiple sclerosis;Multiple myeloma;Transplant rejection;Diffuse large B-cell lymphoma;Liver cancer
T08391	JAK2	Successful target	D0Y2IM	N-(cyanomethyl)-4-(2-(phenylamino)pyrimidin-4-yl)benzamide derivative 1	Patented	Acquired hypomelanotic disorder;Atopic eczema;Myeloproliferative neoplasm;Pancreatic cancer;Rheumatoid arthritis;Thrombocytosis;Muscular dystrophy;Solid tumour/cancer;Alopecia;Asthma;B-cell lymphoma;Breast cancer;Lung cancer;Malignant haematopoietic neoplasm;Leukaemia;Multiple sclerosis;Multiple myeloma;Transplant rejection;Diffuse large B-cell lymphoma;Liver cancer
T08391	JAK2	Successful target	D0Y7IC	Baricitinib	Approved	Acquired hypomelanotic disorder;Atopic eczema;Myeloproliferative neoplasm;Pancreatic cancer;Rheumatoid arthritis;Thrombocytosis;Muscular dystrophy;Solid tumour/cancer;Alopecia;Asthma;B-cell lymphoma;Breast cancer;Lung cancer;Malignant haematopoietic neoplasm;Leukaemia;Multiple sclerosis;Multiple myeloma;Transplant rejection;Diffuse large B-cell lymphoma;Liver cancer
T08391	JAK2	Successful target	D0YJ4D	Pyrrole derivative 7	Patented	Acquired hypomelanotic disorder;Atopic eczema;Myeloproliferative neoplasm;Pancreatic cancer;Rheumatoid arthritis;Thrombocytosis;Muscular dystrophy;Solid tumour/cancer;Alopecia;Asthma;B-cell lymphoma;Breast cancer;Lung cancer;Malignant haematopoietic neoplasm;Leukaemia;Multiple sclerosis;Multiple myeloma;Transplant rejection;Diffuse large B-cell lymphoma;Liver cancer
T08391	JAK2	Successful target	D0YR8S	PMID27774824-Compound-Figure11Example1up	Patented	Acquired hypomelanotic disorder;Atopic eczema;Myeloproliferative neoplasm;Pancreatic cancer;Rheumatoid arthritis;Thrombocytosis;Muscular dystrophy;Solid tumour/cancer;Alopecia;Asthma;B-cell lymphoma;Breast cancer;Lung cancer;Malignant haematopoietic neoplasm;Leukaemia;Multiple sclerosis;Multiple myeloma;Transplant rejection;Diffuse large B-cell lymphoma;Liver cancer
T08391	JAK2	Successful target	DLW69V	1,2,3,4,5,6-hexabromocyclohexane	Investigative	Acquired hypomelanotic disorder;Atopic eczema;Myeloproliferative neoplasm;Pancreatic cancer;Rheumatoid arthritis;Thrombocytosis;Muscular dystrophy;Solid tumour/cancer;Alopecia;Asthma;B-cell lymphoma;Breast cancer;Lung cancer;Malignant haematopoietic neoplasm;Leukaemia;Multiple sclerosis;Multiple myeloma;Transplant rejection;Diffuse large B-cell lymphoma;Liver cancer
T08391	JAK2	Successful target	DU10JI	CTP-543	Phase 2	Acquired hypomelanotic disorder;Atopic eczema;Myeloproliferative neoplasm;Pancreatic cancer;Rheumatoid arthritis;Thrombocytosis;Muscular dystrophy;Solid tumour/cancer;Alopecia;Asthma;B-cell lymphoma;Breast cancer;Lung cancer;Malignant haematopoietic neoplasm;Leukaemia;Multiple sclerosis;Multiple myeloma;Transplant rejection;Diffuse large B-cell lymphoma;Liver cancer
T08922	ACACB	Successful target	D03KHO	PF-05175157	Phase 2	Type 2 diabetes mellitus;Obesity;Parkinsonism;Skin disease
T08922	ACACB	Successful target	D07WIC	CP-640186	Investigative	Type 2 diabetes mellitus;Obesity;Parkinsonism;Skin disease
T08922	ACACB	Successful target	D08FSR	QLT-091382	Investigative	Type 2 diabetes mellitus;Obesity;Parkinsonism;Skin disease
T08922	ACACB	Successful target	D0D7LA	Metformin	Approved	Type 2 diabetes mellitus;Obesity;Parkinsonism;Skin disease
T08922	ACACB	Successful target	D0IY5Y	A-80040	Investigative	Type 2 diabetes mellitus;Obesity;Parkinsonism;Skin disease
T08922	ACACB	Successful target	D0K4WI	2-[4-(2,4-Dichlorophenoxy)Phenoxy]Propanoic Acid	Investigative	Type 2 diabetes mellitus;Obesity;Parkinsonism;Skin disease
T08922	ACACB	Successful target	D0P7HI	AC-8632	Investigative	Type 2 diabetes mellitus;Obesity;Parkinsonism;Skin disease
T08922	ACACB	Successful target	D0WD1E	Soraphen A	Investigative	Type 2 diabetes mellitus;Obesity;Parkinsonism;Skin disease
T09507	APOB	Successful target	D04VOZ	TKM-ApoB	Phase 4	Hyper-lipoproteinaemia
T09507	APOB	Successful target	D08CVQ	Mipomersen	Approved	Hyper-lipoproteinaemia
T09507	APOB	Successful target	D09YRP	ISIS 147788	Investigative	Hyper-lipoproteinaemia
T09507	APOB	Successful target	D0S3JF	ISIS 147483	Investigative	Hyper-lipoproteinaemia
T09826	TOP1	Successful target	D00BZS	Gimatecan	Phase 2	Bacterial infection;Colorectal cancer;Lung cancer;Ovarian cancer;Solid tumour/cancer;Breast cancer;Human immunodeficiency virus disease;Stomach cancer;Brain cancer;Esophageal cancer;Myelodysplastic syndrome;Renal cell carcinoma;Gastrointestinal stromal tumour;Lymphoma;Mature B-cell lymphoma;Bladder cancer
T09826	TOP1	Successful target	D00QTU	TH-1320	Investigative	Bacterial infection;Colorectal cancer;Lung cancer;Ovarian cancer;Solid tumour/cancer;Breast cancer;Human immunodeficiency virus disease;Stomach cancer;Brain cancer;Esophageal cancer;Myelodysplastic syndrome;Renal cell carcinoma;Gastrointestinal stromal tumour;Lymphoma;Mature B-cell lymphoma;Bladder cancer
T09826	TOP1	Successful target	D00SSW	7-amino-4-hydroxy-2-naphthalenesulfonic acid	Investigative	Bacterial infection;Colorectal cancer;Lung cancer;Ovarian cancer;Solid tumour/cancer;Breast cancer;Human immunodeficiency virus disease;Stomach cancer;Brain cancer;Esophageal cancer;Myelodysplastic syndrome;Renal cell carcinoma;Gastrointestinal stromal tumour;Lymphoma;Mature B-cell lymphoma;Bladder cancer
T09826	TOP1	Successful target	D00WYS	3-(4-phenyl-6-(thiophen-2-yl)pyridin-2-yl)-phenol	Investigative	Bacterial infection;Colorectal cancer;Lung cancer;Ovarian cancer;Solid tumour/cancer;Breast cancer;Human immunodeficiency virus disease;Stomach cancer;Brain cancer;Esophageal cancer;Myelodysplastic syndrome;Renal cell carcinoma;Gastrointestinal stromal tumour;Lymphoma;Mature B-cell lymphoma;Bladder cancer
T09826	TOP1	Successful target	D00XCX	DIFLOMOTECAN	Phase 2	Bacterial infection;Colorectal cancer;Lung cancer;Ovarian cancer;Solid tumour/cancer;Breast cancer;Human immunodeficiency virus disease;Stomach cancer;Brain cancer;Esophageal cancer;Myelodysplastic syndrome;Renal cell carcinoma;Gastrointestinal stromal tumour;Lymphoma;Mature B-cell lymphoma;Bladder cancer
T09826	TOP1	Successful target	D01EGN	4-(4,6-diphenylpyridin-2-yl)phenol	Investigative	Bacterial infection;Colorectal cancer;Lung cancer;Ovarian cancer;Solid tumour/cancer;Breast cancer;Human immunodeficiency virus disease;Stomach cancer;Brain cancer;Esophageal cancer;Myelodysplastic syndrome;Renal cell carcinoma;Gastrointestinal stromal tumour;Lymphoma;Mature B-cell lymphoma;Bladder cancer
T09826	TOP1	Successful target	D01FUC	Exatecan	Phase 3	Bacterial infection;Colorectal cancer;Lung cancer;Ovarian cancer;Solid tumour/cancer;Breast cancer;Human immunodeficiency virus disease;Stomach cancer;Brain cancer;Esophageal cancer;Myelodysplastic syndrome;Renal cell carcinoma;Gastrointestinal stromal tumour;Lymphoma;Mature B-cell lymphoma;Bladder cancer
T09826	TOP1	Successful target	D01ILT	CRISNATOL MESILATE	Investigative	Bacterial infection;Colorectal cancer;Lung cancer;Ovarian cancer;Solid tumour/cancer;Breast cancer;Human immunodeficiency virus disease;Stomach cancer;Brain cancer;Esophageal cancer;Myelodysplastic syndrome;Renal cell carcinoma;Gastrointestinal stromal tumour;Lymphoma;Mature B-cell lymphoma;Bladder cancer
T09826	TOP1	Successful target	D01JEX	ROSETTACIN	Investigative	Bacterial infection;Colorectal cancer;Lung cancer;Ovarian cancer;Solid tumour/cancer;Breast cancer;Human immunodeficiency virus disease;Stomach cancer;Brain cancer;Esophageal cancer;Myelodysplastic syndrome;Renal cell carcinoma;Gastrointestinal stromal tumour;Lymphoma;Mature B-cell lymphoma;Bladder cancer
T09826	TOP1	Successful target	D01QKX	(5Z,9Z)-5,9-heptacosadienoic acid	Investigative	Bacterial infection;Colorectal cancer;Lung cancer;Ovarian cancer;Solid tumour/cancer;Breast cancer;Human immunodeficiency virus disease;Stomach cancer;Brain cancer;Esophageal cancer;Myelodysplastic syndrome;Renal cell carcinoma;Gastrointestinal stromal tumour;Lymphoma;Mature B-cell lymphoma;Bladder cancer
T09826	TOP1	Successful target	D02CZK	Karenitecin	Phase 3	Bacterial infection;Colorectal cancer;Lung cancer;Ovarian cancer;Solid tumour/cancer;Breast cancer;Human immunodeficiency virus disease;Stomach cancer;Brain cancer;Esophageal cancer;Myelodysplastic syndrome;Renal cell carcinoma;Gastrointestinal stromal tumour;Lymphoma;Mature B-cell lymphoma;Bladder cancer
T09826	TOP1	Successful target	D02MMY	2,3-Dimethoxybenzo[i]phenanthridines	Investigative	Bacterial infection;Colorectal cancer;Lung cancer;Ovarian cancer;Solid tumour/cancer;Breast cancer;Human immunodeficiency virus disease;Stomach cancer;Brain cancer;Esophageal cancer;Myelodysplastic syndrome;Renal cell carcinoma;Gastrointestinal stromal tumour;Lymphoma;Mature B-cell lymphoma;Bladder cancer
T09826	TOP1	Successful target	D02PAW	TLC-388	Phase 2	Bacterial infection;Colorectal cancer;Lung cancer;Ovarian cancer;Solid tumour/cancer;Breast cancer;Human immunodeficiency virus disease;Stomach cancer;Brain cancer;Esophageal cancer;Myelodysplastic syndrome;Renal cell carcinoma;Gastrointestinal stromal tumour;Lymphoma;Mature B-cell lymphoma;Bladder cancer
T09826	TOP1	Successful target	D02PMO	Topotecan	Approved	Bacterial infection;Colorectal cancer;Lung cancer;Ovarian cancer;Solid tumour/cancer;Breast cancer;Human immunodeficiency virus disease;Stomach cancer;Brain cancer;Esophageal cancer;Myelodysplastic syndrome;Renal cell carcinoma;Gastrointestinal stromal tumour;Lymphoma;Mature B-cell lymphoma;Bladder cancer
T09826	TOP1	Successful target	D02VPC	5-hydroxy-1H-indole-3-acetic acid	Investigative	Bacterial infection;Colorectal cancer;Lung cancer;Ovarian cancer;Solid tumour/cancer;Breast cancer;Human immunodeficiency virus disease;Stomach cancer;Brain cancer;Esophageal cancer;Myelodysplastic syndrome;Renal cell carcinoma;Gastrointestinal stromal tumour;Lymphoma;Mature B-cell lymphoma;Bladder cancer
T09826	TOP1	Successful target	D03JZQ	3-(4-phenyl-6-(thiophen-3-yl)pyridin-2-yl)-phenol	Investigative	Bacterial infection;Colorectal cancer;Lung cancer;Ovarian cancer;Solid tumour/cancer;Breast cancer;Human immunodeficiency virus disease;Stomach cancer;Brain cancer;Esophageal cancer;Myelodysplastic syndrome;Renal cell carcinoma;Gastrointestinal stromal tumour;Lymphoma;Mature B-cell lymphoma;Bladder cancer
T09826	TOP1	Successful target	D03QAS	E-758	Investigative	Bacterial infection;Colorectal cancer;Lung cancer;Ovarian cancer;Solid tumour/cancer;Breast cancer;Human immunodeficiency virus disease;Stomach cancer;Brain cancer;Esophageal cancer;Myelodysplastic syndrome;Renal cell carcinoma;Gastrointestinal stromal tumour;Lymphoma;Mature B-cell lymphoma;Bladder cancer
T09826	TOP1	Successful target	D03RLA	Nogalamycin	Investigative	Bacterial infection;Colorectal cancer;Lung cancer;Ovarian cancer;Solid tumour/cancer;Breast cancer;Human immunodeficiency virus disease;Stomach cancer;Brain cancer;Esophageal cancer;Myelodysplastic syndrome;Renal cell carcinoma;Gastrointestinal stromal tumour;Lymphoma;Mature B-cell lymphoma;Bladder cancer
T09826	TOP1	Successful target	D04AIT	B-Lactams	Approved	Bacterial infection;Colorectal cancer;Lung cancer;Ovarian cancer;Solid tumour/cancer;Breast cancer;Human immunodeficiency virus disease;Stomach cancer;Brain cancer;Esophageal cancer;Myelodysplastic syndrome;Renal cell carcinoma;Gastrointestinal stromal tumour;Lymphoma;Mature B-cell lymphoma;Bladder cancer
T09826	TOP1	Successful target	D04DJM	4-hydroxysaprothoquinone	Investigative	Bacterial infection;Colorectal cancer;Lung cancer;Ovarian cancer;Solid tumour/cancer;Breast cancer;Human immunodeficiency virus disease;Stomach cancer;Brain cancer;Esophageal cancer;Myelodysplastic syndrome;Renal cell carcinoma;Gastrointestinal stromal tumour;Lymphoma;Mature B-cell lymphoma;Bladder cancer
T09826	TOP1	Successful target	D04TIJ	Namitecan	Phase 1	Bacterial infection;Colorectal cancer;Lung cancer;Ovarian cancer;Solid tumour/cancer;Breast cancer;Human immunodeficiency virus disease;Stomach cancer;Brain cancer;Esophageal cancer;Myelodysplastic syndrome;Renal cell carcinoma;Gastrointestinal stromal tumour;Lymphoma;Mature B-cell lymphoma;Bladder cancer
T09826	TOP1	Successful target	D04VPP	ATI-1150	Investigative	Bacterial infection;Colorectal cancer;Lung cancer;Ovarian cancer;Solid tumour/cancer;Breast cancer;Human immunodeficiency virus disease;Stomach cancer;Brain cancer;Esophageal cancer;Myelodysplastic syndrome;Renal cell carcinoma;Gastrointestinal stromal tumour;Lymphoma;Mature B-cell lymphoma;Bladder cancer
T09826	TOP1	Successful target	D05GUK	INTOPLICINE	Phase 1	Bacterial infection;Colorectal cancer;Lung cancer;Ovarian cancer;Solid tumour/cancer;Breast cancer;Human immunodeficiency virus disease;Stomach cancer;Brain cancer;Esophageal cancer;Myelodysplastic syndrome;Renal cell carcinoma;Gastrointestinal stromal tumour;Lymphoma;Mature B-cell lymphoma;Bladder cancer
T09826	TOP1	Successful target	D05UFP	PEG-SN38	Phase 2	Bacterial infection;Colorectal cancer;Lung cancer;Ovarian cancer;Solid tumour/cancer;Breast cancer;Human immunodeficiency virus disease;Stomach cancer;Brain cancer;Esophageal cancer;Myelodysplastic syndrome;Renal cell carcinoma;Gastrointestinal stromal tumour;Lymphoma;Mature B-cell lymphoma;Bladder cancer
T09826	TOP1	Successful target	D06VGG	KT6528	Investigative	Bacterial infection;Colorectal cancer;Lung cancer;Ovarian cancer;Solid tumour/cancer;Breast cancer;Human immunodeficiency virus disease;Stomach cancer;Brain cancer;Esophageal cancer;Myelodysplastic syndrome;Renal cell carcinoma;Gastrointestinal stromal tumour;Lymphoma;Mature B-cell lymphoma;Bladder cancer
T09826	TOP1	Successful target	D06VYE	Belotecan hydrocholoride	Approved	Bacterial infection;Colorectal cancer;Lung cancer;Ovarian cancer;Solid tumour/cancer;Breast cancer;Human immunodeficiency virus disease;Stomach cancer;Brain cancer;Esophageal cancer;Myelodysplastic syndrome;Renal cell carcinoma;Gastrointestinal stromal tumour;Lymphoma;Mature B-cell lymphoma;Bladder cancer
T09826	TOP1	Successful target	D06XCF	EQ-917	Phase 2	Bacterial infection;Colorectal cancer;Lung cancer;Ovarian cancer;Solid tumour/cancer;Breast cancer;Human immunodeficiency virus disease;Stomach cancer;Brain cancer;Esophageal cancer;Myelodysplastic syndrome;Renal cell carcinoma;Gastrointestinal stromal tumour;Lymphoma;Mature B-cell lymphoma;Bladder cancer
T09826	TOP1	Successful target	D07BXE	Daniquidone	Phase 1	Bacterial infection;Colorectal cancer;Lung cancer;Ovarian cancer;Solid tumour/cancer;Breast cancer;Human immunodeficiency virus disease;Stomach cancer;Brain cancer;Esophageal cancer;Myelodysplastic syndrome;Renal cell carcinoma;Gastrointestinal stromal tumour;Lymphoma;Mature B-cell lymphoma;Bladder cancer
T09826	TOP1	Successful target	D07DAU	Tafluposide	Phase 1	Bacterial infection;Colorectal cancer;Lung cancer;Ovarian cancer;Solid tumour/cancer;Breast cancer;Human immunodeficiency virus disease;Stomach cancer;Brain cancer;Esophageal cancer;Myelodysplastic syndrome;Renal cell carcinoma;Gastrointestinal stromal tumour;Lymphoma;Mature B-cell lymphoma;Bladder cancer
T09826	TOP1	Successful target	D07HOB	Irinotecan	Approved	Bacterial infection;Colorectal cancer;Lung cancer;Ovarian cancer;Solid tumour/cancer;Breast cancer;Human immunodeficiency virus disease;Stomach cancer;Brain cancer;Esophageal cancer;Myelodysplastic syndrome;Renal cell carcinoma;Gastrointestinal stromal tumour;Lymphoma;Mature B-cell lymphoma;Bladder cancer
T09826	TOP1	Successful target	D07ILP	10-hydroxycamptothecin	Investigative	Bacterial infection;Colorectal cancer;Lung cancer;Ovarian cancer;Solid tumour/cancer;Breast cancer;Human immunodeficiency virus disease;Stomach cancer;Brain cancer;Esophageal cancer;Myelodysplastic syndrome;Renal cell carcinoma;Gastrointestinal stromal tumour;Lymphoma;Mature B-cell lymphoma;Bladder cancer
T09826	TOP1	Successful target	D07PMG	Afeletecan	Phase 1	Bacterial infection;Colorectal cancer;Lung cancer;Ovarian cancer;Solid tumour/cancer;Breast cancer;Human immunodeficiency virus disease;Stomach cancer;Brain cancer;Esophageal cancer;Myelodysplastic syndrome;Renal cell carcinoma;Gastrointestinal stromal tumour;Lymphoma;Mature B-cell lymphoma;Bladder cancer
T09826	TOP1	Successful target	D07UHX	9-AMINOCAMPTOTHECIN	Phase 2	Bacterial infection;Colorectal cancer;Lung cancer;Ovarian cancer;Solid tumour/cancer;Breast cancer;Human immunodeficiency virus disease;Stomach cancer;Brain cancer;Esophageal cancer;Myelodysplastic syndrome;Renal cell carcinoma;Gastrointestinal stromal tumour;Lymphoma;Mature B-cell lymphoma;Bladder cancer
T09826	TOP1	Successful target	D07VJK	IDN-6384	Investigative	Bacterial infection;Colorectal cancer;Lung cancer;Ovarian cancer;Solid tumour/cancer;Breast cancer;Human immunodeficiency virus disease;Stomach cancer;Brain cancer;Esophageal cancer;Myelodysplastic syndrome;Renal cell carcinoma;Gastrointestinal stromal tumour;Lymphoma;Mature B-cell lymphoma;Bladder cancer
T09826	TOP1	Successful target	D08EES	XR-5000	Phase 2	Bacterial infection;Colorectal cancer;Lung cancer;Ovarian cancer;Solid tumour/cancer;Breast cancer;Human immunodeficiency virus disease;Stomach cancer;Brain cancer;Esophageal cancer;Myelodysplastic syndrome;Renal cell carcinoma;Gastrointestinal stromal tumour;Lymphoma;Mature B-cell lymphoma;Bladder cancer
T09826	TOP1	Successful target	D08VGL	KT6006	Investigative	Bacterial infection;Colorectal cancer;Lung cancer;Ovarian cancer;Solid tumour/cancer;Breast cancer;Human immunodeficiency virus disease;Stomach cancer;Brain cancer;Esophageal cancer;Myelodysplastic syndrome;Renal cell carcinoma;Gastrointestinal stromal tumour;Lymphoma;Mature B-cell lymphoma;Bladder cancer
T09826	TOP1	Successful target	D09CZS	DRF-1042	Phase 1	Bacterial infection;Colorectal cancer;Lung cancer;Ovarian cancer;Solid tumour/cancer;Breast cancer;Human immunodeficiency virus disease;Stomach cancer;Brain cancer;Esophageal cancer;Myelodysplastic syndrome;Renal cell carcinoma;Gastrointestinal stromal tumour;Lymphoma;Mature B-cell lymphoma;Bladder cancer
T09826	TOP1	Successful target	D09YDM	Camptothecin	Phase 3	Bacterial infection;Colorectal cancer;Lung cancer;Ovarian cancer;Solid tumour/cancer;Breast cancer;Human immunodeficiency virus disease;Stomach cancer;Brain cancer;Esophageal cancer;Myelodysplastic syndrome;Renal cell carcinoma;Gastrointestinal stromal tumour;Lymphoma;Mature B-cell lymphoma;Bladder cancer
T09826	TOP1	Successful target	D0A1LS	Genz-644282	Phase 1	Bacterial infection;Colorectal cancer;Lung cancer;Ovarian cancer;Solid tumour/cancer;Breast cancer;Human immunodeficiency virus disease;Stomach cancer;Brain cancer;Esophageal cancer;Myelodysplastic syndrome;Renal cell carcinoma;Gastrointestinal stromal tumour;Lymphoma;Mature B-cell lymphoma;Bladder cancer
T09826	TOP1	Successful target	D0A6NP	A35566-A	Investigative	Bacterial infection;Colorectal cancer;Lung cancer;Ovarian cancer;Solid tumour/cancer;Breast cancer;Human immunodeficiency virus disease;Stomach cancer;Brain cancer;Esophageal cancer;Myelodysplastic syndrome;Renal cell carcinoma;Gastrointestinal stromal tumour;Lymphoma;Mature B-cell lymphoma;Bladder cancer
T09826	TOP1	Successful target	D0B6YB	LE-SN38	Phase 2	Bacterial infection;Colorectal cancer;Lung cancer;Ovarian cancer;Solid tumour/cancer;Breast cancer;Human immunodeficiency virus disease;Stomach cancer;Brain cancer;Esophageal cancer;Myelodysplastic syndrome;Renal cell carcinoma;Gastrointestinal stromal tumour;Lymphoma;Mature B-cell lymphoma;Bladder cancer
T09826	TOP1	Successful target	D0BW2N	GZ402674	Phase 1	Bacterial infection;Colorectal cancer;Lung cancer;Ovarian cancer;Solid tumour/cancer;Breast cancer;Human immunodeficiency virus disease;Stomach cancer;Brain cancer;Esophageal cancer;Myelodysplastic syndrome;Renal cell carcinoma;Gastrointestinal stromal tumour;Lymphoma;Mature B-cell lymphoma;Bladder cancer
T09826	TOP1	Successful target	D0C0AA	DTS-108	Investigative	Bacterial infection;Colorectal cancer;Lung cancer;Ovarian cancer;Solid tumour/cancer;Breast cancer;Human immunodeficiency virus disease;Stomach cancer;Brain cancer;Esophageal cancer;Myelodysplastic syndrome;Renal cell carcinoma;Gastrointestinal stromal tumour;Lymphoma;Mature B-cell lymphoma;Bladder cancer
T09826	TOP1	Successful target	D0D4CX	Pegamotecan	Phase 2	Bacterial infection;Colorectal cancer;Lung cancer;Ovarian cancer;Solid tumour/cancer;Breast cancer;Human immunodeficiency virus disease;Stomach cancer;Brain cancer;Esophageal cancer;Myelodysplastic syndrome;Renal cell carcinoma;Gastrointestinal stromal tumour;Lymphoma;Mature B-cell lymphoma;Bladder cancer
T09826	TOP1	Successful target	D0DW4J	Dibenzo-p-dioxin-2-carboxylic acid	Investigative	Bacterial infection;Colorectal cancer;Lung cancer;Ovarian cancer;Solid tumour/cancer;Breast cancer;Human immunodeficiency virus disease;Stomach cancer;Brain cancer;Esophageal cancer;Myelodysplastic syndrome;Renal cell carcinoma;Gastrointestinal stromal tumour;Lymphoma;Mature B-cell lymphoma;Bladder cancer
T09826	TOP1	Successful target	D0E1VV	ELOMOTECAN HYDROCHLORIDE	Phase 1	Bacterial infection;Colorectal cancer;Lung cancer;Ovarian cancer;Solid tumour/cancer;Breast cancer;Human immunodeficiency virus disease;Stomach cancer;Brain cancer;Esophageal cancer;Myelodysplastic syndrome;Renal cell carcinoma;Gastrointestinal stromal tumour;Lymphoma;Mature B-cell lymphoma;Bladder cancer
T09826	TOP1	Successful target	D0E6QI	MEN-14295	Investigative	Bacterial infection;Colorectal cancer;Lung cancer;Ovarian cancer;Solid tumour/cancer;Breast cancer;Human immunodeficiency virus disease;Stomach cancer;Brain cancer;Esophageal cancer;Myelodysplastic syndrome;Renal cell carcinoma;Gastrointestinal stromal tumour;Lymphoma;Mature B-cell lymphoma;Bladder cancer
T09826	TOP1	Successful target	D0G8ZX	Homocamptothecins (hCPTs)	Investigative	Bacterial infection;Colorectal cancer;Lung cancer;Ovarian cancer;Solid tumour/cancer;Breast cancer;Human immunodeficiency virus disease;Stomach cancer;Brain cancer;Esophageal cancer;Myelodysplastic syndrome;Renal cell carcinoma;Gastrointestinal stromal tumour;Lymphoma;Mature B-cell lymphoma;Bladder cancer
T09826	TOP1	Successful target	D0H5IZ	Etirinotecan pegol	Phase 3	Bacterial infection;Colorectal cancer;Lung cancer;Ovarian cancer;Solid tumour/cancer;Breast cancer;Human immunodeficiency virus disease;Stomach cancer;Brain cancer;Esophageal cancer;Myelodysplastic syndrome;Renal cell carcinoma;Gastrointestinal stromal tumour;Lymphoma;Mature B-cell lymphoma;Bladder cancer
T09826	TOP1	Successful target	D0I1DW	Edotecarin	Phase 3	Bacterial infection;Colorectal cancer;Lung cancer;Ovarian cancer;Solid tumour/cancer;Breast cancer;Human immunodeficiency virus disease;Stomach cancer;Brain cancer;Esophageal cancer;Myelodysplastic syndrome;Renal cell carcinoma;Gastrointestinal stromal tumour;Lymphoma;Mature B-cell lymphoma;Bladder cancer
T09826	TOP1	Successful target	D0I6EJ	3-(4-phenyl-2,4'-bipyridin-6-yl)phenol	Investigative	Bacterial infection;Colorectal cancer;Lung cancer;Ovarian cancer;Solid tumour/cancer;Breast cancer;Human immunodeficiency virus disease;Stomach cancer;Brain cancer;Esophageal cancer;Myelodysplastic syndrome;Renal cell carcinoma;Gastrointestinal stromal tumour;Lymphoma;Mature B-cell lymphoma;Bladder cancer
T09826	TOP1	Successful target	D0K0IS	Polyglutamate camptothecin	Phase 2	Bacterial infection;Colorectal cancer;Lung cancer;Ovarian cancer;Solid tumour/cancer;Breast cancer;Human immunodeficiency virus disease;Stomach cancer;Brain cancer;Esophageal cancer;Myelodysplastic syndrome;Renal cell carcinoma;Gastrointestinal stromal tumour;Lymphoma;Mature B-cell lymphoma;Bladder cancer
T09826	TOP1	Successful target	D0K0WK	NSC-341622	Investigative	Bacterial infection;Colorectal cancer;Lung cancer;Ovarian cancer;Solid tumour/cancer;Breast cancer;Human immunodeficiency virus disease;Stomach cancer;Brain cancer;Esophageal cancer;Myelodysplastic syndrome;Renal cell carcinoma;Gastrointestinal stromal tumour;Lymphoma;Mature B-cell lymphoma;Bladder cancer
T09826	TOP1	Successful target	D0K6QU	IT-141	Phase 1	Bacterial infection;Colorectal cancer;Lung cancer;Ovarian cancer;Solid tumour/cancer;Breast cancer;Human immunodeficiency virus disease;Stomach cancer;Brain cancer;Esophageal cancer;Myelodysplastic syndrome;Renal cell carcinoma;Gastrointestinal stromal tumour;Lymphoma;Mature B-cell lymphoma;Bladder cancer
T09826	TOP1	Successful target	D0L8BN	TOPOSTATIN	Investigative	Bacterial infection;Colorectal cancer;Lung cancer;Ovarian cancer;Solid tumour/cancer;Breast cancer;Human immunodeficiency virus disease;Stomach cancer;Brain cancer;Esophageal cancer;Myelodysplastic syndrome;Renal cell carcinoma;Gastrointestinal stromal tumour;Lymphoma;Mature B-cell lymphoma;Bladder cancer
T09826	TOP1	Successful target	D0M0WX	3-(6-phenyl-2,4'-bipyridin-4-yl)phenol	Investigative	Bacterial infection;Colorectal cancer;Lung cancer;Ovarian cancer;Solid tumour/cancer;Breast cancer;Human immunodeficiency virus disease;Stomach cancer;Brain cancer;Esophageal cancer;Myelodysplastic syndrome;Renal cell carcinoma;Gastrointestinal stromal tumour;Lymphoma;Mature B-cell lymphoma;Bladder cancer
T09826	TOP1	Successful target	D0M6BA	AR-67	Phase 2	Bacterial infection;Colorectal cancer;Lung cancer;Ovarian cancer;Solid tumour/cancer;Breast cancer;Human immunodeficiency virus disease;Stomach cancer;Brain cancer;Esophageal cancer;Myelodysplastic syndrome;Renal cell carcinoma;Gastrointestinal stromal tumour;Lymphoma;Mature B-cell lymphoma;Bladder cancer
T09826	TOP1	Successful target	D0M8KY	(S)-DRF-1042	Clinical trial	Bacterial infection;Colorectal cancer;Lung cancer;Ovarian cancer;Solid tumour/cancer;Breast cancer;Human immunodeficiency virus disease;Stomach cancer;Brain cancer;Esophageal cancer;Myelodysplastic syndrome;Renal cell carcinoma;Gastrointestinal stromal tumour;Lymphoma;Mature B-cell lymphoma;Bladder cancer
T09826	TOP1	Successful target	D0MI5C	3,3'-(4-phenylpyridine-2,6-diyl)diphenol	Investigative	Bacterial infection;Colorectal cancer;Lung cancer;Ovarian cancer;Solid tumour/cancer;Breast cancer;Human immunodeficiency virus disease;Stomach cancer;Brain cancer;Esophageal cancer;Myelodysplastic syndrome;Renal cell carcinoma;Gastrointestinal stromal tumour;Lymphoma;Mature B-cell lymphoma;Bladder cancer
T09826	TOP1	Successful target	D0N0VW	IDN-5174	Investigative	Bacterial infection;Colorectal cancer;Lung cancer;Ovarian cancer;Solid tumour/cancer;Breast cancer;Human immunodeficiency virus disease;Stomach cancer;Brain cancer;Esophageal cancer;Myelodysplastic syndrome;Renal cell carcinoma;Gastrointestinal stromal tumour;Lymphoma;Mature B-cell lymphoma;Bladder cancer
T09826	TOP1	Successful target	D0ND9T	CRLX101	Phase 2	Bacterial infection;Colorectal cancer;Lung cancer;Ovarian cancer;Solid tumour/cancer;Breast cancer;Human immunodeficiency virus disease;Stomach cancer;Brain cancer;Esophageal cancer;Myelodysplastic syndrome;Renal cell carcinoma;Gastrointestinal stromal tumour;Lymphoma;Mature B-cell lymphoma;Bladder cancer
T09826	TOP1	Successful target	D0P4KU	ABI-011	Phase 1	Bacterial infection;Colorectal cancer;Lung cancer;Ovarian cancer;Solid tumour/cancer;Breast cancer;Human immunodeficiency virus disease;Stomach cancer;Brain cancer;Esophageal cancer;Myelodysplastic syndrome;Renal cell carcinoma;Gastrointestinal stromal tumour;Lymphoma;Mature B-cell lymphoma;Bladder cancer
T09826	TOP1	Successful target	D0RL8X	CHO793076	Investigative	Bacterial infection;Colorectal cancer;Lung cancer;Ovarian cancer;Solid tumour/cancer;Breast cancer;Human immunodeficiency virus disease;Stomach cancer;Brain cancer;Esophageal cancer;Myelodysplastic syndrome;Renal cell carcinoma;Gastrointestinal stromal tumour;Lymphoma;Mature B-cell lymphoma;Bladder cancer
T09826	TOP1	Successful target	D0RS4X	PEN-866	Phase 1/2	Bacterial infection;Colorectal cancer;Lung cancer;Ovarian cancer;Solid tumour/cancer;Breast cancer;Human immunodeficiency virus disease;Stomach cancer;Brain cancer;Esophageal cancer;Myelodysplastic syndrome;Renal cell carcinoma;Gastrointestinal stromal tumour;Lymphoma;Mature B-cell lymphoma;Bladder cancer
T09826	TOP1	Successful target	D0TH1I	4-(6-phenyl-2,4'-bipyridin-4-yl)phenol	Investigative	Bacterial infection;Colorectal cancer;Lung cancer;Ovarian cancer;Solid tumour/cancer;Breast cancer;Human immunodeficiency virus disease;Stomach cancer;Brain cancer;Esophageal cancer;Myelodysplastic syndrome;Renal cell carcinoma;Gastrointestinal stromal tumour;Lymphoma;Mature B-cell lymphoma;Bladder cancer
T09826	TOP1	Successful target	D0U0BP	DFP 13318	Phase 1	Bacterial infection;Colorectal cancer;Lung cancer;Ovarian cancer;Solid tumour/cancer;Breast cancer;Human immunodeficiency virus disease;Stomach cancer;Brain cancer;Esophageal cancer;Myelodysplastic syndrome;Renal cell carcinoma;Gastrointestinal stromal tumour;Lymphoma;Mature B-cell lymphoma;Bladder cancer
T09826	TOP1	Successful target	D0U6ML	CKD602	Phase 2	Bacterial infection;Colorectal cancer;Lung cancer;Ovarian cancer;Solid tumour/cancer;Breast cancer;Human immunodeficiency virus disease;Stomach cancer;Brain cancer;Esophageal cancer;Myelodysplastic syndrome;Renal cell carcinoma;Gastrointestinal stromal tumour;Lymphoma;Mature B-cell lymphoma;Bladder cancer
T09826	TOP1	Successful target	D0W0VD	Beta-Lapachone	Phase 2	Bacterial infection;Colorectal cancer;Lung cancer;Ovarian cancer;Solid tumour/cancer;Breast cancer;Human immunodeficiency virus disease;Stomach cancer;Brain cancer;Esophageal cancer;Myelodysplastic syndrome;Renal cell carcinoma;Gastrointestinal stromal tumour;Lymphoma;Mature B-cell lymphoma;Bladder cancer
T09826	TOP1	Successful target	D0Y1FO	Rubitecan	Phase 3	Bacterial infection;Colorectal cancer;Lung cancer;Ovarian cancer;Solid tumour/cancer;Breast cancer;Human immunodeficiency virus disease;Stomach cancer;Brain cancer;Esophageal cancer;Myelodysplastic syndrome;Renal cell carcinoma;Gastrointestinal stromal tumour;Lymphoma;Mature B-cell lymphoma;Bladder cancer
T09826	TOP1	Successful target	D0Y1GJ	MLN-576	Phase 1	Bacterial infection;Colorectal cancer;Lung cancer;Ovarian cancer;Solid tumour/cancer;Breast cancer;Human immunodeficiency virus disease;Stomach cancer;Brain cancer;Esophageal cancer;Myelodysplastic syndrome;Renal cell carcinoma;Gastrointestinal stromal tumour;Lymphoma;Mature B-cell lymphoma;Bladder cancer
T09826	TOP1	Successful target	D0Y6OK	Quinizarin	Investigative	Bacterial infection;Colorectal cancer;Lung cancer;Ovarian cancer;Solid tumour/cancer;Breast cancer;Human immunodeficiency virus disease;Stomach cancer;Brain cancer;Esophageal cancer;Myelodysplastic syndrome;Renal cell carcinoma;Gastrointestinal stromal tumour;Lymphoma;Mature B-cell lymphoma;Bladder cancer
T09826	TOP1	Successful target	D0Z1VE	SER-203	Investigative	Bacterial infection;Colorectal cancer;Lung cancer;Ovarian cancer;Solid tumour/cancer;Breast cancer;Human immunodeficiency virus disease;Stomach cancer;Brain cancer;Esophageal cancer;Myelodysplastic syndrome;Renal cell carcinoma;Gastrointestinal stromal tumour;Lymphoma;Mature B-cell lymphoma;Bladder cancer
T09826	TOP1	Successful target	D0Z4XW	Topetecan	Approved	Bacterial infection;Colorectal cancer;Lung cancer;Ovarian cancer;Solid tumour/cancer;Breast cancer;Human immunodeficiency virus disease;Stomach cancer;Brain cancer;Esophageal cancer;Myelodysplastic syndrome;Renal cell carcinoma;Gastrointestinal stromal tumour;Lymphoma;Mature B-cell lymphoma;Bladder cancer
T09826	TOP1	Successful target	D0Z5VG	CZ-48	Phase 1	Bacterial infection;Colorectal cancer;Lung cancer;Ovarian cancer;Solid tumour/cancer;Breast cancer;Human immunodeficiency virus disease;Stomach cancer;Brain cancer;Esophageal cancer;Myelodysplastic syndrome;Renal cell carcinoma;Gastrointestinal stromal tumour;Lymphoma;Mature B-cell lymphoma;Bladder cancer
T09826	TOP1	Successful target	D0Z7FK	XMT-1001	Phase 1	Bacterial infection;Colorectal cancer;Lung cancer;Ovarian cancer;Solid tumour/cancer;Breast cancer;Human immunodeficiency virus disease;Stomach cancer;Brain cancer;Esophageal cancer;Myelodysplastic syndrome;Renal cell carcinoma;Gastrointestinal stromal tumour;Lymphoma;Mature B-cell lymphoma;Bladder cancer
T09826	TOP1	Successful target	DDXH71	LMP744	Phase 1	Bacterial infection;Colorectal cancer;Lung cancer;Ovarian cancer;Solid tumour/cancer;Breast cancer;Human immunodeficiency virus disease;Stomach cancer;Brain cancer;Esophageal cancer;Myelodysplastic syndrome;Renal cell carcinoma;Gastrointestinal stromal tumour;Lymphoma;Mature B-cell lymphoma;Bladder cancer
T09826	TOP1	Successful target	DJ4X7D	DS-6157	Phase 1	Bacterial infection;Colorectal cancer;Lung cancer;Ovarian cancer;Solid tumour/cancer;Breast cancer;Human immunodeficiency virus disease;Stomach cancer;Brain cancer;Esophageal cancer;Myelodysplastic syndrome;Renal cell carcinoma;Gastrointestinal stromal tumour;Lymphoma;Mature B-cell lymphoma;Bladder cancer
T09826	TOP1	Successful target	DT8R1L	DS-7300	Phase 1/2	Bacterial infection;Colorectal cancer;Lung cancer;Ovarian cancer;Solid tumour/cancer;Breast cancer;Human immunodeficiency virus disease;Stomach cancer;Brain cancer;Esophageal cancer;Myelodysplastic syndrome;Renal cell carcinoma;Gastrointestinal stromal tumour;Lymphoma;Mature B-cell lymphoma;Bladder cancer
T09826	TOP1	Successful target	DV3WF1	LMP400	Phase 1	Bacterial infection;Colorectal cancer;Lung cancer;Ovarian cancer;Solid tumour/cancer;Breast cancer;Human immunodeficiency virus disease;Stomach cancer;Brain cancer;Esophageal cancer;Myelodysplastic syndrome;Renal cell carcinoma;Gastrointestinal stromal tumour;Lymphoma;Mature B-cell lymphoma;Bladder cancer
T10897	SCD	Successful target	D00GQC	Sterculic acid	Investigative	Bacterial infection;Inborn lipid metabolism error;Type 2 diabetes mellitus;Acute diabete complication
T10897	SCD	Successful target	D09PVO	Aramchol	Phase 2/3	Bacterial infection;Inborn lipid metabolism error;Type 2 diabetes mellitus;Acute diabete complication
T10897	SCD	Successful target	D0D9QN	ISIS 147919	Investigative	Bacterial infection;Inborn lipid metabolism error;Type 2 diabetes mellitus;Acute diabete complication
T10897	SCD	Successful target	D0I8CA	Isoxyl	Approved	Bacterial infection;Inborn lipid metabolism error;Type 2 diabetes mellitus;Acute diabete complication
T10897	SCD	Successful target	D0N1QW	2-(4-benzoylpiperazin-1-yl)thiazole-5-carboxamide	Investigative	Bacterial infection;Inborn lipid metabolism error;Type 2 diabetes mellitus;Acute diabete complication
T10897	SCD	Successful target	D0O3TT	MF-152	Investigative	Bacterial infection;Inborn lipid metabolism error;Type 2 diabetes mellitus;Acute diabete complication
T10897	SCD	Successful target	D0O7DP	CVT-12012	Investigative	Bacterial infection;Inborn lipid metabolism error;Type 2 diabetes mellitus;Acute diabete complication
T10897	SCD	Successful target	D0S0RS	MK-8245	Phase 2	Bacterial infection;Inborn lipid metabolism error;Type 2 diabetes mellitus;Acute diabete complication
T13017	SDC1	Clinical trial target	D04PUI	BT-062	Phase 2	Multiple myeloma;Immune system disease
T13017	SDC1	Clinical trial target	D05CTQ	CD138 CAR T cells	Phase 1/2	Multiple myeloma;Immune system disease
T13017	SDC1	Clinical trial target	D09ZDY	CAR138 T Cells	Phase 1	Multiple myeloma;Immune system disease
T13017	SDC1	Clinical trial target	D0M3RI	CART-138 cells	Phase 1/2	Multiple myeloma;Immune system disease
T13017	SDC1	Clinical trial target	D0T6NG	CAR-T cells targeting CD138	Clinical trial	Multiple myeloma;Immune system disease
T13017	SDC1	Clinical trial target	D0Y4MA	CART-138 cells	Phase 1/2	Multiple myeloma;Immune system disease
T13057	PTPN11	Clinical trial target	D00MFW	NSC-87877	Patented	Solid tumour/cancer
T13057	PTPN11	Clinical trial target	D08IID	TNO155	Phase 1	Solid tumour/cancer
T13057	PTPN11	Clinical trial target	D0P7KP	Dodecane-Trimethylamine	Investigative	Solid tumour/cancer
T13057	PTPN11	Clinical trial target	D1LEU5	JAB-3312	Phase 1/2	Solid tumour/cancer
T13057	PTPN11	Clinical trial target	DM16HS	JAB-3068	Phase 1	Solid tumour/cancer
T13057	PTPN11	Clinical trial target	DN7M4T	BBP-398	Phase 1	Solid tumour/cancer
T13057	PTPN11	Clinical trial target	DS9R3G	SAR442720	Phase 1	Solid tumour/cancer
T13057	PTPN11	Clinical trial target	DYQZ38	RLY-1971	Phase 1	Solid tumour/cancer
T13726	RXRA	Successful target	D00ACX	2-chloro-5-nitro-N-phenylbenzamide	Investigative	Kaposi sarcoma;Mycosis fungoides
T13726	RXRA	Successful target	D03ZEL	CD3254	Investigative	Kaposi sarcoma;Mycosis fungoides
T13726	RXRA	Successful target	D05DMH	(5BETA)-PREGNANE-3,20-DIONE	Investigative	Kaposi sarcoma;Mycosis fungoides
T13726	RXRA	Successful target	D05JXE	phytanic acid	Investigative	Kaposi sarcoma;Mycosis fungoides
T13726	RXRA	Successful target	D09IEN	UVI3003	Investigative	Kaposi sarcoma;Mycosis fungoides
T13726	RXRA	Successful target	D0CQ3A	Tributylstannanyl	Investigative	Kaposi sarcoma;Mycosis fungoides
T13726	RXRA	Successful target	D0CT1F	methoprene acid	Investigative	Kaposi sarcoma;Mycosis fungoides
T13726	RXRA	Successful target	D0G3PI	Alitretinoin	Approved	Kaposi sarcoma;Mycosis fungoides
T13726	RXRA	Successful target	D0GR9O	AGN-34	Investigative	Kaposi sarcoma;Mycosis fungoides
T13726	RXRA	Successful target	D0IY9H	PA451	Investigative	Kaposi sarcoma;Mycosis fungoides
T13726	RXRA	Successful target	D0N0RU	Bexarotene	Approved	Kaposi sarcoma;Mycosis fungoides
T13726	RXRA	Successful target	D0Q9FZ	LG100754	Investigative	Kaposi sarcoma;Mycosis fungoides
T15023	NRP1	Successful target	D0GD5G	H-KPPR-OH	Investigative	Retinopathy;Solid tumour/cancer
T15023	NRP1	Successful target	D0UF9W	Pegaptanib	Approved	Retinopathy;Solid tumour/cancer
T15023	NRP1	Successful target	D0YH8F	RG7347	Phase 1	Retinopathy;Solid tumour/cancer
T15023	NRP1	Successful target	D4JV0H	ASP1948	Phase 1	Retinopathy;Solid tumour/cancer
T15334	CETP	Clinical trial target	D00JQE	BAY-60-5521	Phase 1	Arterial occlusive disease;Cardiovascular disease;Hyper-lipoproteinaemia;Myocardial infarction;Inborn lipid metabolism error;Chronic arterial occlusive disease;Dyslipidemia
T15334	CETP	Clinical trial target	D02XXN	Evacetrapib	Phase 3	Arterial occlusive disease;Cardiovascular disease;Hyper-lipoproteinaemia;Myocardial infarction;Inborn lipid metabolism error;Chronic arterial occlusive disease;Dyslipidemia
T15334	CETP	Clinical trial target	D04VCE	TETRAHYDROQUINOLINE A	Investigative	Arterial occlusive disease;Cardiovascular disease;Hyper-lipoproteinaemia;Myocardial infarction;Inborn lipid metabolism error;Chronic arterial occlusive disease;Dyslipidemia
T15334	CETP	Clinical trial target	D04WPM	SC-795	Investigative	Arterial occlusive disease;Cardiovascular disease;Hyper-lipoproteinaemia;Myocardial infarction;Inborn lipid metabolism error;Chronic arterial occlusive disease;Dyslipidemia
T15334	CETP	Clinical trial target	D04ZBU	JTT-302	Phase 2	Arterial occlusive disease;Cardiovascular disease;Hyper-lipoproteinaemia;Myocardial infarction;Inborn lipid metabolism error;Chronic arterial occlusive disease;Dyslipidemia
T15334	CETP	Clinical trial target	D05QXT	BAY-38-1315	Preclinical	Arterial occlusive disease;Cardiovascular disease;Hyper-lipoproteinaemia;Myocardial infarction;Inborn lipid metabolism error;Chronic arterial occlusive disease;Dyslipidemia
T15334	CETP	Clinical trial target	D05SSC	Dalcetrapib	Phase 3	Arterial occlusive disease;Cardiovascular disease;Hyper-lipoproteinaemia;Myocardial infarction;Inborn lipid metabolism error;Chronic arterial occlusive disease;Dyslipidemia
T15334	CETP	Clinical trial target	D05TQP	NSC-89508	Investigative	Arterial occlusive disease;Cardiovascular disease;Hyper-lipoproteinaemia;Myocardial infarction;Inborn lipid metabolism error;Chronic arterial occlusive disease;Dyslipidemia
T15334	CETP	Clinical trial target	D07HLS	Anacetrapib	Phase 3	Arterial occlusive disease;Cardiovascular disease;Hyper-lipoproteinaemia;Myocardial infarction;Inborn lipid metabolism error;Chronic arterial occlusive disease;Dyslipidemia
T15334	CETP	Clinical trial target	D07UJA	DRL-17822	Phase 2	Arterial occlusive disease;Cardiovascular disease;Hyper-lipoproteinaemia;Myocardial infarction;Inborn lipid metabolism error;Chronic arterial occlusive disease;Dyslipidemia
T15334	CETP	Clinical trial target	D0C9FK	TETRAHYDROQUINOLINE B	Investigative	Arterial occlusive disease;Cardiovascular disease;Hyper-lipoproteinaemia;Myocardial infarction;Inborn lipid metabolism error;Chronic arterial occlusive disease;Dyslipidemia
T15334	CETP	Clinical trial target	D0G7MM	TA-8995	Phase 2	Arterial occlusive disease;Cardiovascular disease;Hyper-lipoproteinaemia;Myocardial infarction;Inborn lipid metabolism error;Chronic arterial occlusive disease;Dyslipidemia
T15334	CETP	Clinical trial target	D0M1TF	NSC-40331	Investigative	Arterial occlusive disease;Cardiovascular disease;Hyper-lipoproteinaemia;Myocardial infarction;Inborn lipid metabolism error;Chronic arterial occlusive disease;Dyslipidemia
T15510	IRS1	Clinical trial target	DUI59O	NT219	Phase 1/2	Solid tumour/cancer
T15700	CASP8	Patented-recorded target	D08LIU	Amooranin	Investigative	Diabetes mellitus;Solid tumour/cancer
T15700	CASP8	Patented-recorded target	D0N8TA	Acetyl-Ile-Glu-Thr-Asp-aldehyde	Investigative	Diabetes mellitus;Solid tumour/cancer
T15700	CASP8	Patented-recorded target	D0Y2TI	Glionitrin A	Investigative	Diabetes mellitus;Solid tumour/cancer
T15739	TP53	Clinical trial target	D01KTG	HDM201	Phase 1	Arterial occlusive disease;Lip/oral cavity/pharynx neoplasm;Metastatic liver/bile duct neoplasm;Transplant rejection;Ovarian dysfunction;Acute myeloid leukaemia;Bladder cancer;Brain cancer;Colorectal cancer;Esophageal cancer;Head and neck cancer;Mature B-cell leukaemia;Myelodysplastic syndrome;Ovarian cancer;Pancreatic cancer;Solid tumour/cancer;Stomach cancer;Cervical cancer;Endometrial cancer;F…
T15739	TP53	Clinical trial target	D01QKK	NUTLIN-3	Investigative	Arterial occlusive disease;Lip/oral cavity/pharynx neoplasm;Metastatic liver/bile duct neoplasm;Transplant rejection;Ovarian dysfunction;Acute myeloid leukaemia;Bladder cancer;Brain cancer;Colorectal cancer;Esophageal cancer;Head and neck cancer;Mature B-cell leukaemia;Myelodysplastic syndrome;Ovarian cancer;Pancreatic cancer;Solid tumour/cancer;Stomach cancer;Cervical cancer;Endometrial cancer;F…
T15739	TP53	Clinical trial target	D02EOH	SGT-53	Phase 2	Arterial occlusive disease;Lip/oral cavity/pharynx neoplasm;Metastatic liver/bile duct neoplasm;Transplant rejection;Ovarian dysfunction;Acute myeloid leukaemia;Bladder cancer;Brain cancer;Colorectal cancer;Esophageal cancer;Head and neck cancer;Mature B-cell leukaemia;Myelodysplastic syndrome;Ovarian cancer;Pancreatic cancer;Solid tumour/cancer;Stomach cancer;Cervical cancer;Endometrial cancer;F…
T15739	TP53	Clinical trial target	D03XTY	APR-246	Phase 2	Arterial occlusive disease;Lip/oral cavity/pharynx neoplasm;Metastatic liver/bile duct neoplasm;Transplant rejection;Ovarian dysfunction;Acute myeloid leukaemia;Bladder cancer;Brain cancer;Colorectal cancer;Esophageal cancer;Head and neck cancer;Mature B-cell leukaemia;Myelodysplastic syndrome;Ovarian cancer;Pancreatic cancer;Solid tumour/cancer;Stomach cancer;Cervical cancer;Endometrial cancer;F…
T15739	TP53	Clinical trial target	D03YSQ	SAR-405838	Phase 1	Arterial occlusive disease;Lip/oral cavity/pharynx neoplasm;Metastatic liver/bile duct neoplasm;Transplant rejection;Ovarian dysfunction;Acute myeloid leukaemia;Bladder cancer;Brain cancer;Colorectal cancer;Esophageal cancer;Head and neck cancer;Mature B-cell leukaemia;Myelodysplastic syndrome;Ovarian cancer;Pancreatic cancer;Solid tumour/cancer;Stomach cancer;Cervical cancer;Endometrial cancer;F…
T15739	TP53	Clinical trial target	D04FYL	Contusugene ladenovec	Phase 3	Arterial occlusive disease;Lip/oral cavity/pharynx neoplasm;Metastatic liver/bile duct neoplasm;Transplant rejection;Ovarian dysfunction;Acute myeloid leukaemia;Bladder cancer;Brain cancer;Colorectal cancer;Esophageal cancer;Head and neck cancer;Mature B-cell leukaemia;Myelodysplastic syndrome;Ovarian cancer;Pancreatic cancer;Solid tumour/cancer;Stomach cancer;Cervical cancer;Endometrial cancer;F…
T15739	TP53	Clinical trial target	D04SXL	APG-115	Phase 2	Arterial occlusive disease;Lip/oral cavity/pharynx neoplasm;Metastatic liver/bile duct neoplasm;Transplant rejection;Ovarian dysfunction;Acute myeloid leukaemia;Bladder cancer;Brain cancer;Colorectal cancer;Esophageal cancer;Head and neck cancer;Mature B-cell leukaemia;Myelodysplastic syndrome;Ovarian cancer;Pancreatic cancer;Solid tumour/cancer;Stomach cancer;Cervical cancer;Endometrial cancer;F…
T15739	TP53	Clinical trial target	D05CPS	Dendritic cell vaccine	Phase 1	Arterial occlusive disease;Lip/oral cavity/pharynx neoplasm;Metastatic liver/bile duct neoplasm;Transplant rejection;Ovarian dysfunction;Acute myeloid leukaemia;Bladder cancer;Brain cancer;Colorectal cancer;Esophageal cancer;Head and neck cancer;Mature B-cell leukaemia;Myelodysplastic syndrome;Ovarian cancer;Pancreatic cancer;Solid tumour/cancer;Stomach cancer;Cervical cancer;Endometrial cancer;F…
T15739	TP53	Clinical trial target	D08PLU	1-(9-ethyl-9H-carbazol-3-yl)-N-methylmethanamine	Investigative	Arterial occlusive disease;Lip/oral cavity/pharynx neoplasm;Metastatic liver/bile duct neoplasm;Transplant rejection;Ovarian dysfunction;Acute myeloid leukaemia;Bladder cancer;Brain cancer;Colorectal cancer;Esophageal cancer;Head and neck cancer;Mature B-cell leukaemia;Myelodysplastic syndrome;Ovarian cancer;Pancreatic cancer;Solid tumour/cancer;Stomach cancer;Cervical cancer;Endometrial cancer;F…
T15739	TP53	Clinical trial target	D0CO9B	Ad-p53	Phase 2	Arterial occlusive disease;Lip/oral cavity/pharynx neoplasm;Metastatic liver/bile duct neoplasm;Transplant rejection;Ovarian dysfunction;Acute myeloid leukaemia;Bladder cancer;Brain cancer;Colorectal cancer;Esophageal cancer;Head and neck cancer;Mature B-cell leukaemia;Myelodysplastic syndrome;Ovarian cancer;Pancreatic cancer;Solid tumour/cancer;Stomach cancer;Cervical cancer;Endometrial cancer;F…
T15739	TP53	Clinical trial target	D0D5ZU	QPI-1002	Phase 3	Arterial occlusive disease;Lip/oral cavity/pharynx neoplasm;Metastatic liver/bile duct neoplasm;Transplant rejection;Ovarian dysfunction;Acute myeloid leukaemia;Bladder cancer;Brain cancer;Colorectal cancer;Esophageal cancer;Head and neck cancer;Mature B-cell leukaemia;Myelodysplastic syndrome;Ovarian cancer;Pancreatic cancer;Solid tumour/cancer;Stomach cancer;Cervical cancer;Endometrial cancer;F…
T15739	TP53	Clinical trial target	D0F1SN	NU-8231	Investigative	Arterial occlusive disease;Lip/oral cavity/pharynx neoplasm;Metastatic liver/bile duct neoplasm;Transplant rejection;Ovarian dysfunction;Acute myeloid leukaemia;Bladder cancer;Brain cancer;Colorectal cancer;Esophageal cancer;Head and neck cancer;Mature B-cell leukaemia;Myelodysplastic syndrome;Ovarian cancer;Pancreatic cancer;Solid tumour/cancer;Stomach cancer;Cervical cancer;Endometrial cancer;F…
T15739	TP53	Clinical trial target	D0G7YS	ONYX-015	Phase 1	Arterial occlusive disease;Lip/oral cavity/pharynx neoplasm;Metastatic liver/bile duct neoplasm;Transplant rejection;Ovarian dysfunction;Acute myeloid leukaemia;Bladder cancer;Brain cancer;Colorectal cancer;Esophageal cancer;Head and neck cancer;Mature B-cell leukaemia;Myelodysplastic syndrome;Ovarian cancer;Pancreatic cancer;Solid tumour/cancer;Stomach cancer;Cervical cancer;Endometrial cancer;F…
T15739	TP53	Clinical trial target	D0G8CU	COTI-2	Phase 1	Arterial occlusive disease;Lip/oral cavity/pharynx neoplasm;Metastatic liver/bile duct neoplasm;Transplant rejection;Ovarian dysfunction;Acute myeloid leukaemia;Bladder cancer;Brain cancer;Colorectal cancer;Esophageal cancer;Head and neck cancer;Mature B-cell leukaemia;Myelodysplastic syndrome;Ovarian cancer;Pancreatic cancer;Solid tumour/cancer;Stomach cancer;Cervical cancer;Endometrial cancer;F…
T15739	TP53	Clinical trial target	D0K7DV	Kevetrin	Phase 2	Arterial occlusive disease;Lip/oral cavity/pharynx neoplasm;Metastatic liver/bile duct neoplasm;Transplant rejection;Ovarian dysfunction;Acute myeloid leukaemia;Bladder cancer;Brain cancer;Colorectal cancer;Esophageal cancer;Head and neck cancer;Mature B-cell leukaemia;Myelodysplastic syndrome;Ovarian cancer;Pancreatic cancer;Solid tumour/cancer;Stomach cancer;Cervical cancer;Endometrial cancer;F…
T15739	TP53	Clinical trial target	D0KK4N	ISA-P53-01	Phase 1/2	Arterial occlusive disease;Lip/oral cavity/pharynx neoplasm;Metastatic liver/bile duct neoplasm;Transplant rejection;Ovarian dysfunction;Acute myeloid leukaemia;Bladder cancer;Brain cancer;Colorectal cancer;Esophageal cancer;Head and neck cancer;Mature B-cell leukaemia;Myelodysplastic syndrome;Ovarian cancer;Pancreatic cancer;Solid tumour/cancer;Stomach cancer;Cervical cancer;Endometrial cancer;F…
T15739	TP53	Clinical trial target	D0Q7AG	CGM097	Phase 1	Arterial occlusive disease;Lip/oral cavity/pharynx neoplasm;Metastatic liver/bile duct neoplasm;Transplant rejection;Ovarian dysfunction;Acute myeloid leukaemia;Bladder cancer;Brain cancer;Colorectal cancer;Esophageal cancer;Head and neck cancer;Mature B-cell leukaemia;Myelodysplastic syndrome;Ovarian cancer;Pancreatic cancer;Solid tumour/cancer;Stomach cancer;Cervical cancer;Endometrial cancer;F…
T15739	TP53	Clinical trial target	D0V2SP	INGN-225	Phase 2	Arterial occlusive disease;Lip/oral cavity/pharynx neoplasm;Metastatic liver/bile duct neoplasm;Transplant rejection;Ovarian dysfunction;Acute myeloid leukaemia;Bladder cancer;Brain cancer;Colorectal cancer;Esophageal cancer;Head and neck cancer;Mature B-cell leukaemia;Myelodysplastic syndrome;Ovarian cancer;Pancreatic cancer;Solid tumour/cancer;Stomach cancer;Cervical cancer;Endometrial cancer;F…
T15739	TP53	Clinical trial target	D0V5JH	ALT-801	Phase 2	Arterial occlusive disease;Lip/oral cavity/pharynx neoplasm;Metastatic liver/bile duct neoplasm;Transplant rejection;Ovarian dysfunction;Acute myeloid leukaemia;Bladder cancer;Brain cancer;Colorectal cancer;Esophageal cancer;Head and neck cancer;Mature B-cell leukaemia;Myelodysplastic syndrome;Ovarian cancer;Pancreatic cancer;Solid tumour/cancer;Stomach cancer;Cervical cancer;Endometrial cancer;F…
T15739	TP53	Clinical trial target	DY4OZ6	Thymoquinone	Phase 2/3	Arterial occlusive disease;Lip/oral cavity/pharynx neoplasm;Metastatic liver/bile duct neoplasm;Transplant rejection;Ovarian dysfunction;Acute myeloid leukaemia;Bladder cancer;Brain cancer;Colorectal cancer;Esophageal cancer;Head and neck cancer;Mature B-cell leukaemia;Myelodysplastic syndrome;Ovarian cancer;Pancreatic cancer;Solid tumour/cancer;Stomach cancer;Cervical cancer;Endometrial cancer;F…
T16739	KDM1A	Clinical trial target	D01CIK	Heteroaryl-cyclopropylamine derivative 4	Patented	Acute myeloid leukaemia;Lymphoma;Malignant haematopoietic neoplasm;Myelodysplastic syndrome;Myeloproliferative neoplasm;Lung cancer;Ewing sarcoma;Solid tumour/cancer
T16739	KDM1A	Clinical trial target	D02CIX	Cyclopropylamine derivative 11	Patented	Acute myeloid leukaemia;Lymphoma;Malignant haematopoietic neoplasm;Myelodysplastic syndrome;Myeloproliferative neoplasm;Lung cancer;Ewing sarcoma;Solid tumour/cancer
T16739	KDM1A	Clinical trial target	D02WXS	PMID25399762-Compound-Table 6-11	Patented	Acute myeloid leukaemia;Lymphoma;Malignant haematopoietic neoplasm;Myelodysplastic syndrome;Myeloproliferative neoplasm;Lung cancer;Ewing sarcoma;Solid tumour/cancer
T16739	KDM1A	Clinical trial target	D02YGX	PMID27019002-Compound-16	Patented	Acute myeloid leukaemia;Lymphoma;Malignant haematopoietic neoplasm;Myelodysplastic syndrome;Myeloproliferative neoplasm;Lung cancer;Ewing sarcoma;Solid tumour/cancer
T16739	KDM1A	Clinical trial target	D03EOZ	IMG-7289	Phase 2	Acute myeloid leukaemia;Lymphoma;Malignant haematopoietic neoplasm;Myelodysplastic syndrome;Myeloproliferative neoplasm;Lung cancer;Ewing sarcoma;Solid tumour/cancer
T16739	KDM1A	Clinical trial target	D03MPD	PMID27019002-Compound-20a	Patented	Acute myeloid leukaemia;Lymphoma;Malignant haematopoietic neoplasm;Myelodysplastic syndrome;Myeloproliferative neoplasm;Lung cancer;Ewing sarcoma;Solid tumour/cancer
T16739	KDM1A	Clinical trial target	D04GNG	CC-90011	Phase 1	Acute myeloid leukaemia;Lymphoma;Malignant haematopoietic neoplasm;Myelodysplastic syndrome;Myeloproliferative neoplasm;Lung cancer;Ewing sarcoma;Solid tumour/cancer
T16739	KDM1A	Clinical trial target	D04OEV	Cyclic peptide derivative 1	Patented	Acute myeloid leukaemia;Lymphoma;Malignant haematopoietic neoplasm;Myelodysplastic syndrome;Myeloproliferative neoplasm;Lung cancer;Ewing sarcoma;Solid tumour/cancer
T16739	KDM1A	Clinical trial target	D04OHC	Tarnylcypromine derivative 2	Patented	Acute myeloid leukaemia;Lymphoma;Malignant haematopoietic neoplasm;Myelodysplastic syndrome;Myeloproliferative neoplasm;Lung cancer;Ewing sarcoma;Solid tumour/cancer
T16739	KDM1A	Clinical trial target	D04PWX	Cyclopropylamine derivative 9	Patented	Acute myeloid leukaemia;Lymphoma;Malignant haematopoietic neoplasm;Myelodysplastic syndrome;Myeloproliferative neoplasm;Lung cancer;Ewing sarcoma;Solid tumour/cancer
T16739	KDM1A	Clinical trial target	D05FVW	PMID27019002-Compound-41	Patented	Acute myeloid leukaemia;Lymphoma;Malignant haematopoietic neoplasm;Myelodysplastic syndrome;Myeloproliferative neoplasm;Lung cancer;Ewing sarcoma;Solid tumour/cancer
T16739	KDM1A	Clinical trial target	D05HBM	Benzenamine derivative 2	Patented	Acute myeloid leukaemia;Lymphoma;Malignant haematopoietic neoplasm;Myelodysplastic syndrome;Myeloproliferative neoplasm;Lung cancer;Ewing sarcoma;Solid tumour/cancer
T16739	KDM1A	Clinical trial target	D06KBT	PMID25399762-Compound-Table 6-13	Patented	Acute myeloid leukaemia;Lymphoma;Malignant haematopoietic neoplasm;Myelodysplastic syndrome;Myeloproliferative neoplasm;Lung cancer;Ewing sarcoma;Solid tumour/cancer
T16739	KDM1A	Clinical trial target	D06VMN	Heteroaryl-cyclopropylamine derivative 3	Patented	Acute myeloid leukaemia;Lymphoma;Malignant haematopoietic neoplasm;Myelodysplastic syndrome;Myeloproliferative neoplasm;Lung cancer;Ewing sarcoma;Solid tumour/cancer
T16739	KDM1A	Clinical trial target	D06XEU	PMID27019002-Compound-28a	Patented	Acute myeloid leukaemia;Lymphoma;Malignant haematopoietic neoplasm;Myelodysplastic syndrome;Myeloproliferative neoplasm;Lung cancer;Ewing sarcoma;Solid tumour/cancer
T16739	KDM1A	Clinical trial target	D07DIJ	Cyclopropylamine derivative 13	Patented	Acute myeloid leukaemia;Lymphoma;Malignant haematopoietic neoplasm;Myelodysplastic syndrome;Myeloproliferative neoplasm;Lung cancer;Ewing sarcoma;Solid tumour/cancer
T16739	KDM1A	Clinical trial target	D07IAO	Aryl cyclopropylamine derivative 5	Patented	Acute myeloid leukaemia;Lymphoma;Malignant haematopoietic neoplasm;Myelodysplastic syndrome;Myeloproliferative neoplasm;Lung cancer;Ewing sarcoma;Solid tumour/cancer
T16739	KDM1A	Clinical trial target	D07LKA	Pyrimidine derivative 17	Patented	Acute myeloid leukaemia;Lymphoma;Malignant haematopoietic neoplasm;Myelodysplastic syndrome;Myeloproliferative neoplasm;Lung cancer;Ewing sarcoma;Solid tumour/cancer
T16739	KDM1A	Clinical trial target	D07MQD	PMID27019002-Compound-21b	Patented	Acute myeloid leukaemia;Lymphoma;Malignant haematopoietic neoplasm;Myelodysplastic syndrome;Myeloproliferative neoplasm;Lung cancer;Ewing sarcoma;Solid tumour/cancer
T16739	KDM1A	Clinical trial target	D07NTA	Heteroaryl-cyclopropylamine derivative 1	Patented	Acute myeloid leukaemia;Lymphoma;Malignant haematopoietic neoplasm;Myelodysplastic syndrome;Myeloproliferative neoplasm;Lung cancer;Ewing sarcoma;Solid tumour/cancer
T16739	KDM1A	Clinical trial target	D08FVR	PMID27019002-Compound-31b	Patented	Acute myeloid leukaemia;Lymphoma;Malignant haematopoietic neoplasm;Myelodysplastic syndrome;Myeloproliferative neoplasm;Lung cancer;Ewing sarcoma;Solid tumour/cancer
T16739	KDM1A	Clinical trial target	D08IOP	N-(2-phenylcyclopropyl) amino acid derivative 3	Patented	Acute myeloid leukaemia;Lymphoma;Malignant haematopoietic neoplasm;Myelodysplastic syndrome;Myeloproliferative neoplasm;Lung cancer;Ewing sarcoma;Solid tumour/cancer
T16739	KDM1A	Clinical trial target	D08WMK	Benzenamine derivative 3	Patented	Acute myeloid leukaemia;Lymphoma;Malignant haematopoietic neoplasm;Myelodysplastic syndrome;Myeloproliferative neoplasm;Lung cancer;Ewing sarcoma;Solid tumour/cancer
T16739	KDM1A	Clinical trial target	D09OMM	PMID27019002-Compound-48	Patented	Acute myeloid leukaemia;Lymphoma;Malignant haematopoietic neoplasm;Myelodysplastic syndrome;Myeloproliferative neoplasm;Lung cancer;Ewing sarcoma;Solid tumour/cancer
T16739	KDM1A	Clinical trial target	D0AI6J	PMID25399762-Compound-Table 6-10	Patented	Acute myeloid leukaemia;Lymphoma;Malignant haematopoietic neoplasm;Myelodysplastic syndrome;Myeloproliferative neoplasm;Lung cancer;Ewing sarcoma;Solid tumour/cancer
T16739	KDM1A	Clinical trial target	D0B6GK	Cyclopropylamine derivative 1	Patented	Acute myeloid leukaemia;Lymphoma;Malignant haematopoietic neoplasm;Myelodysplastic syndrome;Myeloproliferative neoplasm;Lung cancer;Ewing sarcoma;Solid tumour/cancer
T16739	KDM1A	Clinical trial target	D0BE4Z	N6-cyclopropyllydine derivative 1	Patented	Acute myeloid leukaemia;Lymphoma;Malignant haematopoietic neoplasm;Myelodysplastic syndrome;Myeloproliferative neoplasm;Lung cancer;Ewing sarcoma;Solid tumour/cancer
T16739	KDM1A	Clinical trial target	D0BG7B	Tarnylcypromine derivative 1	Patented	Acute myeloid leukaemia;Lymphoma;Malignant haematopoietic neoplasm;Myelodysplastic syndrome;Myeloproliferative neoplasm;Lung cancer;Ewing sarcoma;Solid tumour/cancer
T16739	KDM1A	Clinical trial target	D0C0PK	Cyclopropylamine derivative 7	Patented	Acute myeloid leukaemia;Lymphoma;Malignant haematopoietic neoplasm;Myelodysplastic syndrome;Myeloproliferative neoplasm;Lung cancer;Ewing sarcoma;Solid tumour/cancer
T16739	KDM1A	Clinical trial target	D0C1TH	Aryl cyclopropylamine derivative 4	Patented	Acute myeloid leukaemia;Lymphoma;Malignant haematopoietic neoplasm;Myelodysplastic syndrome;Myeloproliferative neoplasm;Lung cancer;Ewing sarcoma;Solid tumour/cancer
T16739	KDM1A	Clinical trial target	D0C8SX	OG-L002	Investigative	Acute myeloid leukaemia;Lymphoma;Malignant haematopoietic neoplasm;Myelodysplastic syndrome;Myeloproliferative neoplasm;Lung cancer;Ewing sarcoma;Solid tumour/cancer
T16739	KDM1A	Clinical trial target	D0D9CK	PMID27019002-Compound-45	Patented	Acute myeloid leukaemia;Lymphoma;Malignant haematopoietic neoplasm;Myelodysplastic syndrome;Myeloproliferative neoplasm;Lung cancer;Ewing sarcoma;Solid tumour/cancer
T16739	KDM1A	Clinical trial target	D0DD4I	PMID27019002-Compound-13	Patented	Acute myeloid leukaemia;Lymphoma;Malignant haematopoietic neoplasm;Myelodysplastic syndrome;Myeloproliferative neoplasm;Lung cancer;Ewing sarcoma;Solid tumour/cancer
T16739	KDM1A	Clinical trial target	D0DL5J	PMID27019002-Compound-49	Patented	Acute myeloid leukaemia;Lymphoma;Malignant haematopoietic neoplasm;Myelodysplastic syndrome;Myeloproliferative neoplasm;Lung cancer;Ewing sarcoma;Solid tumour/cancer
T16739	KDM1A	Clinical trial target	D0E7SF	PMID25399762-Compound-Table 6-12	Patented	Acute myeloid leukaemia;Lymphoma;Malignant haematopoietic neoplasm;Myelodysplastic syndrome;Myeloproliferative neoplasm;Lung cancer;Ewing sarcoma;Solid tumour/cancer
T16739	KDM1A	Clinical trial target	D0EV7U	GSK-LSD1	Investigative	Acute myeloid leukaemia;Lymphoma;Malignant haematopoietic neoplasm;Myelodysplastic syndrome;Myeloproliferative neoplasm;Lung cancer;Ewing sarcoma;Solid tumour/cancer
T16739	KDM1A	Clinical trial target	D0F1CT	Cyclopropylamine derivative 4	Patented	Acute myeloid leukaemia;Lymphoma;Malignant haematopoietic neoplasm;Myelodysplastic syndrome;Myeloproliferative neoplasm;Lung cancer;Ewing sarcoma;Solid tumour/cancer
T16739	KDM1A	Clinical trial target	D0GA7D	PMID27019002-Compound-42b	Patented	Acute myeloid leukaemia;Lymphoma;Malignant haematopoietic neoplasm;Myelodysplastic syndrome;Myeloproliferative neoplasm;Lung cancer;Ewing sarcoma;Solid tumour/cancer
T16739	KDM1A	Clinical trial target	D0I4ZN	GSK2879552	Phase 1	Acute myeloid leukaemia;Lymphoma;Malignant haematopoietic neoplasm;Myelodysplastic syndrome;Myeloproliferative neoplasm;Lung cancer;Ewing sarcoma;Solid tumour/cancer
T16739	KDM1A	Clinical trial target	D0I9QC	PMID27019002-Compound-31a	Patented	Acute myeloid leukaemia;Lymphoma;Malignant haematopoietic neoplasm;Myelodysplastic syndrome;Myeloproliferative neoplasm;Lung cancer;Ewing sarcoma;Solid tumour/cancer
T16739	KDM1A	Clinical trial target	D0IO2A	PMID25399762-Compound-Table 6-9	Patented	Acute myeloid leukaemia;Lymphoma;Malignant haematopoietic neoplasm;Myelodysplastic syndrome;Myeloproliferative neoplasm;Lung cancer;Ewing sarcoma;Solid tumour/cancer
T16739	KDM1A	Clinical trial target	D0J1HQ	PMID27019002-Compound-43c	Patented	Acute myeloid leukaemia;Lymphoma;Malignant haematopoietic neoplasm;Myelodysplastic syndrome;Myeloproliferative neoplasm;Lung cancer;Ewing sarcoma;Solid tumour/cancer
T16739	KDM1A	Clinical trial target	D0JE6I	Aryl cyclopropylamine derivative 3	Patented	Acute myeloid leukaemia;Lymphoma;Malignant haematopoietic neoplasm;Myelodysplastic syndrome;Myeloproliferative neoplasm;Lung cancer;Ewing sarcoma;Solid tumour/cancer
T16739	KDM1A	Clinical trial target	D0KR0I	Benzenamine derivative 4	Patented	Acute myeloid leukaemia;Lymphoma;Malignant haematopoietic neoplasm;Myelodysplastic syndrome;Myeloproliferative neoplasm;Lung cancer;Ewing sarcoma;Solid tumour/cancer
T16739	KDM1A	Clinical trial target	D0KZ5T	Cyclopropylamine derivative 6	Patented	Acute myeloid leukaemia;Lymphoma;Malignant haematopoietic neoplasm;Myelodysplastic syndrome;Myeloproliferative neoplasm;Lung cancer;Ewing sarcoma;Solid tumour/cancer
T16739	KDM1A	Clinical trial target	D0L0DT	Pyrimidine derivative 16	Patented	Acute myeloid leukaemia;Lymphoma;Malignant haematopoietic neoplasm;Myelodysplastic syndrome;Myeloproliferative neoplasm;Lung cancer;Ewing sarcoma;Solid tumour/cancer
T16739	KDM1A	Clinical trial target	D0L4OH	PMID27019002-Compound-28	Patented	Acute myeloid leukaemia;Lymphoma;Malignant haematopoietic neoplasm;Myelodysplastic syndrome;Myeloproliferative neoplasm;Lung cancer;Ewing sarcoma;Solid tumour/cancer
T16739	KDM1A	Clinical trial target	D0L6TQ	NCL-1	Investigative	Acute myeloid leukaemia;Lymphoma;Malignant haematopoietic neoplasm;Myelodysplastic syndrome;Myeloproliferative neoplasm;Lung cancer;Ewing sarcoma;Solid tumour/cancer
T16739	KDM1A	Clinical trial target	D0LK8A	Heteroaryl-cyclopropylamine derivative 2	Patented	Acute myeloid leukaemia;Lymphoma;Malignant haematopoietic neoplasm;Myelodysplastic syndrome;Myeloproliferative neoplasm;Lung cancer;Ewing sarcoma;Solid tumour/cancer
T16739	KDM1A	Clinical trial target	D0LR6D	Cyclopropylamine derivative 5	Patented	Acute myeloid leukaemia;Lymphoma;Malignant haematopoietic neoplasm;Myelodysplastic syndrome;Myeloproliferative neoplasm;Lung cancer;Ewing sarcoma;Solid tumour/cancer
T16739	KDM1A	Clinical trial target	D0MO5Y	PMID27019002-Compound-43b	Patented	Acute myeloid leukaemia;Lymphoma;Malignant haematopoietic neoplasm;Myelodysplastic syndrome;Myeloproliferative neoplasm;Lung cancer;Ewing sarcoma;Solid tumour/cancer
T16739	KDM1A	Clinical trial target	D0N2QZ	Pyrimidine derivative 18	Patented	Acute myeloid leukaemia;Lymphoma;Malignant haematopoietic neoplasm;Myelodysplastic syndrome;Myeloproliferative neoplasm;Lung cancer;Ewing sarcoma;Solid tumour/cancer
T16739	KDM1A	Clinical trial target	D0NJ6B	Cyclopropylamine derivative 3	Patented	Acute myeloid leukaemia;Lymphoma;Malignant haematopoietic neoplasm;Myelodysplastic syndrome;Myeloproliferative neoplasm;Lung cancer;Ewing sarcoma;Solid tumour/cancer
T16739	KDM1A	Clinical trial target	D0O2WW	PMID27019002-Compound-20b	Patented	Acute myeloid leukaemia;Lymphoma;Malignant haematopoietic neoplasm;Myelodysplastic syndrome;Myeloproliferative neoplasm;Lung cancer;Ewing sarcoma;Solid tumour/cancer
T16739	KDM1A	Clinical trial target	D0O7IH	Tarnylcypromine derivative 3	Patented	Acute myeloid leukaemia;Lymphoma;Malignant haematopoietic neoplasm;Myelodysplastic syndrome;Myeloproliferative neoplasm;Lung cancer;Ewing sarcoma;Solid tumour/cancer
T16739	KDM1A	Clinical trial target	D0P4NF	PMID27019002-Compound-50	Patented	Acute myeloid leukaemia;Lymphoma;Malignant haematopoietic neoplasm;Myelodysplastic syndrome;Myeloproliferative neoplasm;Lung cancer;Ewing sarcoma;Solid tumour/cancer
T16739	KDM1A	Clinical trial target	D0PM2S	PMID25399762-Compound-Table 6-14	Patented	Acute myeloid leukaemia;Lymphoma;Malignant haematopoietic neoplasm;Myelodysplastic syndrome;Myeloproliferative neoplasm;Lung cancer;Ewing sarcoma;Solid tumour/cancer
T16739	KDM1A	Clinical trial target	D0Q1EG	PMID25399762-Compound-Table 6-15	Patented	Acute myeloid leukaemia;Lymphoma;Malignant haematopoietic neoplasm;Myelodysplastic syndrome;Myeloproliferative neoplasm;Lung cancer;Ewing sarcoma;Solid tumour/cancer
T16739	KDM1A	Clinical trial target	D0R2YA	Cyclopropylamine derivative 12	Patented	Acute myeloid leukaemia;Lymphoma;Malignant haematopoietic neoplasm;Myelodysplastic syndrome;Myeloproliferative neoplasm;Lung cancer;Ewing sarcoma;Solid tumour/cancer
T16739	KDM1A	Clinical trial target	D0R7CD	INCB59872	Phase 1/2	Acute myeloid leukaemia;Lymphoma;Malignant haematopoietic neoplasm;Myelodysplastic syndrome;Myeloproliferative neoplasm;Lung cancer;Ewing sarcoma;Solid tumour/cancer
T16739	KDM1A	Clinical trial target	D0R7RY	Cyclopropylamine derivative 8	Patented	Acute myeloid leukaemia;Lymphoma;Malignant haematopoietic neoplasm;Myelodysplastic syndrome;Myeloproliferative neoplasm;Lung cancer;Ewing sarcoma;Solid tumour/cancer
T16739	KDM1A	Clinical trial target	D0RC0G	PMID27019002-Compound-43a	Patented	Acute myeloid leukaemia;Lymphoma;Malignant haematopoietic neoplasm;Myelodysplastic syndrome;Myeloproliferative neoplasm;Lung cancer;Ewing sarcoma;Solid tumour/cancer
T16739	KDM1A	Clinical trial target	D0U1DY	Benzenamine derivative 1	Patented	Acute myeloid leukaemia;Lymphoma;Malignant haematopoietic neoplasm;Myelodysplastic syndrome;Myeloproliferative neoplasm;Lung cancer;Ewing sarcoma;Solid tumour/cancer
T16739	KDM1A	Clinical trial target	D0U4DT	PMID27019002-Compound-7	Patented	Acute myeloid leukaemia;Lymphoma;Malignant haematopoietic neoplasm;Myelodysplastic syndrome;Myeloproliferative neoplasm;Lung cancer;Ewing sarcoma;Solid tumour/cancer
T16739	KDM1A	Clinical trial target	D0UE4K	PMID27019002-Compound-21c	Patented	Acute myeloid leukaemia;Lymphoma;Malignant haematopoietic neoplasm;Myelodysplastic syndrome;Myeloproliferative neoplasm;Lung cancer;Ewing sarcoma;Solid tumour/cancer
T16739	KDM1A	Clinical trial target	D0UG5Q	PMID27019002-Compound-42a	Patented	Acute myeloid leukaemia;Lymphoma;Malignant haematopoietic neoplasm;Myelodysplastic syndrome;Myeloproliferative neoplasm;Lung cancer;Ewing sarcoma;Solid tumour/cancer
T16739	KDM1A	Clinical trial target	D0UL9U	N-(2-phenylcyclopropyl) amino acid derivative 1	Patented	Acute myeloid leukaemia;Lymphoma;Malignant haematopoietic neoplasm;Myelodysplastic syndrome;Myeloproliferative neoplasm;Lung cancer;Ewing sarcoma;Solid tumour/cancer
T16739	KDM1A	Clinical trial target	D0VB7F	PMID27019002-Compound-37a	Patented	Acute myeloid leukaemia;Lymphoma;Malignant haematopoietic neoplasm;Myelodysplastic syndrome;Myeloproliferative neoplasm;Lung cancer;Ewing sarcoma;Solid tumour/cancer
T16739	KDM1A	Clinical trial target	D0W8XM	PMID27019002-Compound-44	Patented	Acute myeloid leukaemia;Lymphoma;Malignant haematopoietic neoplasm;Myelodysplastic syndrome;Myeloproliferative neoplasm;Lung cancer;Ewing sarcoma;Solid tumour/cancer
T16739	KDM1A	Clinical trial target	D0W9VF	Cyclopropylamine derivative 10	Patented	Acute myeloid leukaemia;Lymphoma;Malignant haematopoietic neoplasm;Myelodysplastic syndrome;Myeloproliferative neoplasm;Lung cancer;Ewing sarcoma;Solid tumour/cancer
T16739	KDM1A	Clinical trial target	D0WO5W	PMID27019002-Compound-47	Patented	Acute myeloid leukaemia;Lymphoma;Malignant haematopoietic neoplasm;Myelodysplastic syndrome;Myeloproliferative neoplasm;Lung cancer;Ewing sarcoma;Solid tumour/cancer
T16739	KDM1A	Clinical trial target	D0WT1Z	PMID27019002-Compound-17	Patented	Acute myeloid leukaemia;Lymphoma;Malignant haematopoietic neoplasm;Myelodysplastic syndrome;Myeloproliferative neoplasm;Lung cancer;Ewing sarcoma;Solid tumour/cancer
T16739	KDM1A	Clinical trial target	D0XH9M	N-(2-phenylcyclopropyl) amino acid derivative 2	Patented	Acute myeloid leukaemia;Lymphoma;Malignant haematopoietic neoplasm;Myelodysplastic syndrome;Myeloproliferative neoplasm;Lung cancer;Ewing sarcoma;Solid tumour/cancer
T16739	KDM1A	Clinical trial target	D0YI0V	PMID27019002-Compound-21a	Patented	Acute myeloid leukaemia;Lymphoma;Malignant haematopoietic neoplasm;Myelodysplastic syndrome;Myeloproliferative neoplasm;Lung cancer;Ewing sarcoma;Solid tumour/cancer
T16739	KDM1A	Clinical trial target	D0YX4R	PMID27019002-Compound-37b	Patented	Acute myeloid leukaemia;Lymphoma;Malignant haematopoietic neoplasm;Myelodysplastic syndrome;Myeloproliferative neoplasm;Lung cancer;Ewing sarcoma;Solid tumour/cancer
T16739	KDM1A	Clinical trial target	D0Z7HE	PMID27019002-Compound-46	Patented	Acute myeloid leukaemia;Lymphoma;Malignant haematopoietic neoplasm;Myelodysplastic syndrome;Myeloproliferative neoplasm;Lung cancer;Ewing sarcoma;Solid tumour/cancer
T16739	KDM1A	Clinical trial target	DB5UA2	CC-90011	Phase 2	Acute myeloid leukaemia;Lymphoma;Malignant haematopoietic neoplasm;Myelodysplastic syndrome;Myeloproliferative neoplasm;Lung cancer;Ewing sarcoma;Solid tumour/cancer
T16739	KDM1A	Clinical trial target	DCWT40	Seclidemstat	Phase 1	Acute myeloid leukaemia;Lymphoma;Malignant haematopoietic neoplasm;Myelodysplastic syndrome;Myeloproliferative neoplasm;Lung cancer;Ewing sarcoma;Solid tumour/cancer
T16739	KDM1A	Clinical trial target	DI17KH	TAS-1440	Phase 1	Acute myeloid leukaemia;Lymphoma;Malignant haematopoietic neoplasm;Myelodysplastic syndrome;Myeloproliferative neoplasm;Lung cancer;Ewing sarcoma;Solid tumour/cancer
T17163	LEPR	Successful target	D06GZW	PEGylated leptin	Investigative	Acute diabete complication;Alzheimer disease;Cachexia;Obesity;Solid tumour/cancer
T17163	LEPR	Successful target	D07OED	BL-5040	Investigative	Acute diabete complication;Alzheimer disease;Cachexia;Obesity;Solid tumour/cancer
T17163	LEPR	Successful target	D08HUB	ANG-2004	Investigative	Acute diabete complication;Alzheimer disease;Cachexia;Obesity;Solid tumour/cancer
T17163	LEPR	Successful target	D0B3IZ	AMPSL	Investigative	Acute diabete complication;Alzheimer disease;Cachexia;Obesity;Solid tumour/cancer
T17163	LEPR	Successful target	D0C6TL	Leptin	Investigative	Acute diabete complication;Alzheimer disease;Cachexia;Obesity;Solid tumour/cancer
T17163	LEPR	Successful target	D0D1PQ	EDP-21	Investigative	Acute diabete complication;Alzheimer disease;Cachexia;Obesity;Solid tumour/cancer
T17163	LEPR	Successful target	D0D7YR	AMPE4L	Investigative	Acute diabete complication;Alzheimer disease;Cachexia;Obesity;Solid tumour/cancer
T17163	LEPR	Successful target	D0G8BE	AMPPL	Investigative	Acute diabete complication;Alzheimer disease;Cachexia;Obesity;Solid tumour/cancer
T17163	LEPR	Successful target	D0J3AV	PEG-LPA-2	Investigative	Acute diabete complication;Alzheimer disease;Cachexia;Obesity;Solid tumour/cancer
T17163	LEPR	Successful target	D0Z9EO	Metreleptin	Approved	Acute diabete complication;Alzheimer disease;Cachexia;Obesity;Solid tumour/cancer
T17710	HP	Clinical trial target	D00GZY	AT1001	Phase 3	Diabetes mellitus
T19368	LIPG	Clinical trial target	D02NHW	GSK-264220A	Clinical trial	Coagulation defect
T20761	VEGFA	Successful target	D00IVN	Navicixizumab	Phase 1	Colorectal cancer;Lung cancer;Metastatic tumour;Ovarian cancer;Retinopathy;Solid tumour/cancer;Vascular system developmental anomaly;Breast cancer;Hypopharyngeal cancer;Liver cancer;Lymphoma;Malignant haematopoietic neoplasm;Nasopharyngeal cancer;Rheumatoid arthritis;Muscular atrophy;Fallopian tube cancer;Peritoneal cancer;Bone growth disorder;Circulatory system disease;Corneal disease;Fibrosis;M…
T20761	VEGFA	Successful target	D00ZFY	Carbamide derivative 17	Patented	Colorectal cancer;Lung cancer;Metastatic tumour;Ovarian cancer;Retinopathy;Solid tumour/cancer;Vascular system developmental anomaly;Breast cancer;Hypopharyngeal cancer;Liver cancer;Lymphoma;Malignant haematopoietic neoplasm;Nasopharyngeal cancer;Rheumatoid arthritis;Muscular atrophy;Fallopian tube cancer;Peritoneal cancer;Bone growth disorder;Circulatory system disease;Corneal disease;Fibrosis;M…
T20761	VEGFA	Successful target	D01CKB	Carbamide derivative 16	Patented	Colorectal cancer;Lung cancer;Metastatic tumour;Ovarian cancer;Retinopathy;Solid tumour/cancer;Vascular system developmental anomaly;Breast cancer;Hypopharyngeal cancer;Liver cancer;Lymphoma;Malignant haematopoietic neoplasm;Nasopharyngeal cancer;Rheumatoid arthritis;Muscular atrophy;Fallopian tube cancer;Peritoneal cancer;Bone growth disorder;Circulatory system disease;Corneal disease;Fibrosis;M…
T20761	VEGFA	Successful target	D01DJZ	Indoline derivative 18	Patented	Colorectal cancer;Lung cancer;Metastatic tumour;Ovarian cancer;Retinopathy;Solid tumour/cancer;Vascular system developmental anomaly;Breast cancer;Hypopharyngeal cancer;Liver cancer;Lymphoma;Malignant haematopoietic neoplasm;Nasopharyngeal cancer;Rheumatoid arthritis;Muscular atrophy;Fallopian tube cancer;Peritoneal cancer;Bone growth disorder;Circulatory system disease;Corneal disease;Fibrosis;M…
T20761	VEGFA	Successful target	D01IFD	Antibodie derivative 11	Patented	Colorectal cancer;Lung cancer;Metastatic tumour;Ovarian cancer;Retinopathy;Solid tumour/cancer;Vascular system developmental anomaly;Breast cancer;Hypopharyngeal cancer;Liver cancer;Lymphoma;Malignant haematopoietic neoplasm;Nasopharyngeal cancer;Rheumatoid arthritis;Muscular atrophy;Fallopian tube cancer;Peritoneal cancer;Bone growth disorder;Circulatory system disease;Corneal disease;Fibrosis;M…
T20761	VEGFA	Successful target	D01OEF	Pyridine derivative 2	Patented	Colorectal cancer;Lung cancer;Metastatic tumour;Ovarian cancer;Retinopathy;Solid tumour/cancer;Vascular system developmental anomaly;Breast cancer;Hypopharyngeal cancer;Liver cancer;Lymphoma;Malignant haematopoietic neoplasm;Nasopharyngeal cancer;Rheumatoid arthritis;Muscular atrophy;Fallopian tube cancer;Peritoneal cancer;Bone growth disorder;Circulatory system disease;Corneal disease;Fibrosis;M…
T20761	VEGFA	Successful target	D03HPW	Indoline derivative 16	Patented	Colorectal cancer;Lung cancer;Metastatic tumour;Ovarian cancer;Retinopathy;Solid tumour/cancer;Vascular system developmental anomaly;Breast cancer;Hypopharyngeal cancer;Liver cancer;Lymphoma;Malignant haematopoietic neoplasm;Nasopharyngeal cancer;Rheumatoid arthritis;Muscular atrophy;Fallopian tube cancer;Peritoneal cancer;Bone growth disorder;Circulatory system disease;Corneal disease;Fibrosis;M…
T20761	VEGFA	Successful target	D03SZN	Carbamide derivative 22	Patented	Colorectal cancer;Lung cancer;Metastatic tumour;Ovarian cancer;Retinopathy;Solid tumour/cancer;Vascular system developmental anomaly;Breast cancer;Hypopharyngeal cancer;Liver cancer;Lymphoma;Malignant haematopoietic neoplasm;Nasopharyngeal cancer;Rheumatoid arthritis;Muscular atrophy;Fallopian tube cancer;Peritoneal cancer;Bone growth disorder;Circulatory system disease;Corneal disease;Fibrosis;M…
T20761	VEGFA	Successful target	D03VXQ	Oxetane 3,3-dicarboxamide compound 1	Patented	Colorectal cancer;Lung cancer;Metastatic tumour;Ovarian cancer;Retinopathy;Solid tumour/cancer;Vascular system developmental anomaly;Breast cancer;Hypopharyngeal cancer;Liver cancer;Lymphoma;Malignant haematopoietic neoplasm;Nasopharyngeal cancer;Rheumatoid arthritis;Muscular atrophy;Fallopian tube cancer;Peritoneal cancer;Bone growth disorder;Circulatory system disease;Corneal disease;Fibrosis;M…
T20761	VEGFA	Successful target	D04EYG	Ranibizumab	Approved	Colorectal cancer;Lung cancer;Metastatic tumour;Ovarian cancer;Retinopathy;Solid tumour/cancer;Vascular system developmental anomaly;Breast cancer;Hypopharyngeal cancer;Liver cancer;Lymphoma;Malignant haematopoietic neoplasm;Nasopharyngeal cancer;Rheumatoid arthritis;Muscular atrophy;Fallopian tube cancer;Peritoneal cancer;Bone growth disorder;Circulatory system disease;Corneal disease;Fibrosis;M…
T20761	VEGFA	Successful target	D04KBL	Bevacizumab	Approved	Colorectal cancer;Lung cancer;Metastatic tumour;Ovarian cancer;Retinopathy;Solid tumour/cancer;Vascular system developmental anomaly;Breast cancer;Hypopharyngeal cancer;Liver cancer;Lymphoma;Malignant haematopoietic neoplasm;Nasopharyngeal cancer;Rheumatoid arthritis;Muscular atrophy;Fallopian tube cancer;Peritoneal cancer;Bone growth disorder;Circulatory system disease;Corneal disease;Fibrosis;M…
T20761	VEGFA	Successful target	D04PKQ	Conjugated 3-(indolyl)-and 3-(azaindolyl)-4-arylmaleimide compound 1	Patented	Colorectal cancer;Lung cancer;Metastatic tumour;Ovarian cancer;Retinopathy;Solid tumour/cancer;Vascular system developmental anomaly;Breast cancer;Hypopharyngeal cancer;Liver cancer;Lymphoma;Malignant haematopoietic neoplasm;Nasopharyngeal cancer;Rheumatoid arthritis;Muscular atrophy;Fallopian tube cancer;Peritoneal cancer;Bone growth disorder;Circulatory system disease;Corneal disease;Fibrosis;M…
T20761	VEGFA	Successful target	D04SLF	Bevacizumab + Trastuzumab	Phase 3	Colorectal cancer;Lung cancer;Metastatic tumour;Ovarian cancer;Retinopathy;Solid tumour/cancer;Vascular system developmental anomaly;Breast cancer;Hypopharyngeal cancer;Liver cancer;Lymphoma;Malignant haematopoietic neoplasm;Nasopharyngeal cancer;Rheumatoid arthritis;Muscular atrophy;Fallopian tube cancer;Peritoneal cancer;Bone growth disorder;Circulatory system disease;Corneal disease;Fibrosis;M…
T20761	VEGFA	Successful target	D04UKD	1,6-naphyridine-4-ketone fused heterocyclic derivative 1	Patented	Colorectal cancer;Lung cancer;Metastatic tumour;Ovarian cancer;Retinopathy;Solid tumour/cancer;Vascular system developmental anomaly;Breast cancer;Hypopharyngeal cancer;Liver cancer;Lymphoma;Malignant haematopoietic neoplasm;Nasopharyngeal cancer;Rheumatoid arthritis;Muscular atrophy;Fallopian tube cancer;Peritoneal cancer;Bone growth disorder;Circulatory system disease;Corneal disease;Fibrosis;M…
T20761	VEGFA	Successful target	D05GVV	Pyrimidine derivative 5	Patented	Colorectal cancer;Lung cancer;Metastatic tumour;Ovarian cancer;Retinopathy;Solid tumour/cancer;Vascular system developmental anomaly;Breast cancer;Hypopharyngeal cancer;Liver cancer;Lymphoma;Malignant haematopoietic neoplasm;Nasopharyngeal cancer;Rheumatoid arthritis;Muscular atrophy;Fallopian tube cancer;Peritoneal cancer;Bone growth disorder;Circulatory system disease;Corneal disease;Fibrosis;M…
T20761	VEGFA	Successful target	D05LBH	PMID28621580-Compound-WO2013112959C68	Patented	Colorectal cancer;Lung cancer;Metastatic tumour;Ovarian cancer;Retinopathy;Solid tumour/cancer;Vascular system developmental anomaly;Breast cancer;Hypopharyngeal cancer;Liver cancer;Lymphoma;Malignant haematopoietic neoplasm;Nasopharyngeal cancer;Rheumatoid arthritis;Muscular atrophy;Fallopian tube cancer;Peritoneal cancer;Bone growth disorder;Circulatory system disease;Corneal disease;Fibrosis;M…
T20761	VEGFA	Successful target	D05VVX	PTC299	Phase 2	Colorectal cancer;Lung cancer;Metastatic tumour;Ovarian cancer;Retinopathy;Solid tumour/cancer;Vascular system developmental anomaly;Breast cancer;Hypopharyngeal cancer;Liver cancer;Lymphoma;Malignant haematopoietic neoplasm;Nasopharyngeal cancer;Rheumatoid arthritis;Muscular atrophy;Fallopian tube cancer;Peritoneal cancer;Bone growth disorder;Circulatory system disease;Corneal disease;Fibrosis;M…
T20761	VEGFA	Successful target	D05WTW	Carbamide derivative 23	Patented	Colorectal cancer;Lung cancer;Metastatic tumour;Ovarian cancer;Retinopathy;Solid tumour/cancer;Vascular system developmental anomaly;Breast cancer;Hypopharyngeal cancer;Liver cancer;Lymphoma;Malignant haematopoietic neoplasm;Nasopharyngeal cancer;Rheumatoid arthritis;Muscular atrophy;Fallopian tube cancer;Peritoneal cancer;Bone growth disorder;Circulatory system disease;Corneal disease;Fibrosis;M…
T20761	VEGFA	Successful target	D06ARD	Quinoline and quinazoline derivative 7	Patented	Colorectal cancer;Lung cancer;Metastatic tumour;Ovarian cancer;Retinopathy;Solid tumour/cancer;Vascular system developmental anomaly;Breast cancer;Hypopharyngeal cancer;Liver cancer;Lymphoma;Malignant haematopoietic neoplasm;Nasopharyngeal cancer;Rheumatoid arthritis;Muscular atrophy;Fallopian tube cancer;Peritoneal cancer;Bone growth disorder;Circulatory system disease;Corneal disease;Fibrosis;M…
T20761	VEGFA	Successful target	D06FTM	RG7221	Phase 2	Colorectal cancer;Lung cancer;Metastatic tumour;Ovarian cancer;Retinopathy;Solid tumour/cancer;Vascular system developmental anomaly;Breast cancer;Hypopharyngeal cancer;Liver cancer;Lymphoma;Malignant haematopoietic neoplasm;Nasopharyngeal cancer;Rheumatoid arthritis;Muscular atrophy;Fallopian tube cancer;Peritoneal cancer;Bone growth disorder;Circulatory system disease;Corneal disease;Fibrosis;M…
T20761	VEGFA	Successful target	D07AVU	PMID28621580-Compound-WO2015089220C70	Patented	Colorectal cancer;Lung cancer;Metastatic tumour;Ovarian cancer;Retinopathy;Solid tumour/cancer;Vascular system developmental anomaly;Breast cancer;Hypopharyngeal cancer;Liver cancer;Lymphoma;Malignant haematopoietic neoplasm;Nasopharyngeal cancer;Rheumatoid arthritis;Muscular atrophy;Fallopian tube cancer;Peritoneal cancer;Bone growth disorder;Circulatory system disease;Corneal disease;Fibrosis;M…
T20761	VEGFA	Successful target	D07ESG	Pyrimidine derivative 9	Patented	Colorectal cancer;Lung cancer;Metastatic tumour;Ovarian cancer;Retinopathy;Solid tumour/cancer;Vascular system developmental anomaly;Breast cancer;Hypopharyngeal cancer;Liver cancer;Lymphoma;Malignant haematopoietic neoplasm;Nasopharyngeal cancer;Rheumatoid arthritis;Muscular atrophy;Fallopian tube cancer;Peritoneal cancer;Bone growth disorder;Circulatory system disease;Corneal disease;Fibrosis;M…
T20761	VEGFA	Successful target	D07UJJ	Quinoline and quinazoline derivative 4	Patented	Colorectal cancer;Lung cancer;Metastatic tumour;Ovarian cancer;Retinopathy;Solid tumour/cancer;Vascular system developmental anomaly;Breast cancer;Hypopharyngeal cancer;Liver cancer;Lymphoma;Malignant haematopoietic neoplasm;Nasopharyngeal cancer;Rheumatoid arthritis;Muscular atrophy;Fallopian tube cancer;Peritoneal cancer;Bone growth disorder;Circulatory system disease;Corneal disease;Fibrosis;M…
T20761	VEGFA	Successful target	D08CGU	Bevacizumab + Rituximab	Phase 3	Colorectal cancer;Lung cancer;Metastatic tumour;Ovarian cancer;Retinopathy;Solid tumour/cancer;Vascular system developmental anomaly;Breast cancer;Hypopharyngeal cancer;Liver cancer;Lymphoma;Malignant haematopoietic neoplasm;Nasopharyngeal cancer;Rheumatoid arthritis;Muscular atrophy;Fallopian tube cancer;Peritoneal cancer;Bone growth disorder;Circulatory system disease;Corneal disease;Fibrosis;M…
T20761	VEGFA	Successful target	D08INZ	Pyridine derivative 5	Patented	Colorectal cancer;Lung cancer;Metastatic tumour;Ovarian cancer;Retinopathy;Solid tumour/cancer;Vascular system developmental anomaly;Breast cancer;Hypopharyngeal cancer;Liver cancer;Lymphoma;Malignant haematopoietic neoplasm;Nasopharyngeal cancer;Rheumatoid arthritis;Muscular atrophy;Fallopian tube cancer;Peritoneal cancer;Bone growth disorder;Circulatory system disease;Corneal disease;Fibrosis;M…
T20761	VEGFA	Successful target	D08XDA	Carbamide derivative 15	Patented	Colorectal cancer;Lung cancer;Metastatic tumour;Ovarian cancer;Retinopathy;Solid tumour/cancer;Vascular system developmental anomaly;Breast cancer;Hypopharyngeal cancer;Liver cancer;Lymphoma;Malignant haematopoietic neoplasm;Nasopharyngeal cancer;Rheumatoid arthritis;Muscular atrophy;Fallopian tube cancer;Peritoneal cancer;Bone growth disorder;Circulatory system disease;Corneal disease;Fibrosis;M…
T20761	VEGFA	Successful target	D09BKY	Bevacizumab + Erlotinib	Phase 3	Colorectal cancer;Lung cancer;Metastatic tumour;Ovarian cancer;Retinopathy;Solid tumour/cancer;Vascular system developmental anomaly;Breast cancer;Hypopharyngeal cancer;Liver cancer;Lymphoma;Malignant haematopoietic neoplasm;Nasopharyngeal cancer;Rheumatoid arthritis;Muscular atrophy;Fallopian tube cancer;Peritoneal cancer;Bone growth disorder;Circulatory system disease;Corneal disease;Fibrosis;M…
T20761	VEGFA	Successful target	D09GWR	Antibodie derivative 3	Patented	Colorectal cancer;Lung cancer;Metastatic tumour;Ovarian cancer;Retinopathy;Solid tumour/cancer;Vascular system developmental anomaly;Breast cancer;Hypopharyngeal cancer;Liver cancer;Lymphoma;Malignant haematopoietic neoplasm;Nasopharyngeal cancer;Rheumatoid arthritis;Muscular atrophy;Fallopian tube cancer;Peritoneal cancer;Bone growth disorder;Circulatory system disease;Corneal disease;Fibrosis;M…
T20761	VEGFA	Successful target	D09KYB	Pyrimidine derivative 7	Patented	Colorectal cancer;Lung cancer;Metastatic tumour;Ovarian cancer;Retinopathy;Solid tumour/cancer;Vascular system developmental anomaly;Breast cancer;Hypopharyngeal cancer;Liver cancer;Lymphoma;Malignant haematopoietic neoplasm;Nasopharyngeal cancer;Rheumatoid arthritis;Muscular atrophy;Fallopian tube cancer;Peritoneal cancer;Bone growth disorder;Circulatory system disease;Corneal disease;Fibrosis;M…
T20761	VEGFA	Successful target	D0A5NC	Carbamide derivative 18	Patented	Colorectal cancer;Lung cancer;Metastatic tumour;Ovarian cancer;Retinopathy;Solid tumour/cancer;Vascular system developmental anomaly;Breast cancer;Hypopharyngeal cancer;Liver cancer;Lymphoma;Malignant haematopoietic neoplasm;Nasopharyngeal cancer;Rheumatoid arthritis;Muscular atrophy;Fallopian tube cancer;Peritoneal cancer;Bone growth disorder;Circulatory system disease;Corneal disease;Fibrosis;M…
T20761	VEGFA	Successful target	D0A8SH	Indoline derivative 21	Patented	Colorectal cancer;Lung cancer;Metastatic tumour;Ovarian cancer;Retinopathy;Solid tumour/cancer;Vascular system developmental anomaly;Breast cancer;Hypopharyngeal cancer;Liver cancer;Lymphoma;Malignant haematopoietic neoplasm;Nasopharyngeal cancer;Rheumatoid arthritis;Muscular atrophy;Fallopian tube cancer;Peritoneal cancer;Bone growth disorder;Circulatory system disease;Corneal disease;Fibrosis;M…
T20761	VEGFA	Successful target	D0A9RY	Pyrimidine derivative 10	Patented	Colorectal cancer;Lung cancer;Metastatic tumour;Ovarian cancer;Retinopathy;Solid tumour/cancer;Vascular system developmental anomaly;Breast cancer;Hypopharyngeal cancer;Liver cancer;Lymphoma;Malignant haematopoietic neoplasm;Nasopharyngeal cancer;Rheumatoid arthritis;Muscular atrophy;Fallopian tube cancer;Peritoneal cancer;Bone growth disorder;Circulatory system disease;Corneal disease;Fibrosis;M…
T20761	VEGFA	Successful target	D0BA5J	Pyridine derivative 7	Patented	Colorectal cancer;Lung cancer;Metastatic tumour;Ovarian cancer;Retinopathy;Solid tumour/cancer;Vascular system developmental anomaly;Breast cancer;Hypopharyngeal cancer;Liver cancer;Lymphoma;Malignant haematopoietic neoplasm;Nasopharyngeal cancer;Rheumatoid arthritis;Muscular atrophy;Fallopian tube cancer;Peritoneal cancer;Bone growth disorder;Circulatory system disease;Corneal disease;Fibrosis;M…
T20761	VEGFA	Successful target	D0BL4H	Quinoline and quinazoline derivative 6	Patented	Colorectal cancer;Lung cancer;Metastatic tumour;Ovarian cancer;Retinopathy;Solid tumour/cancer;Vascular system developmental anomaly;Breast cancer;Hypopharyngeal cancer;Liver cancer;Lymphoma;Malignant haematopoietic neoplasm;Nasopharyngeal cancer;Rheumatoid arthritis;Muscular atrophy;Fallopian tube cancer;Peritoneal cancer;Bone growth disorder;Circulatory system disease;Corneal disease;Fibrosis;M…
T20761	VEGFA	Successful target	D0C0NH	Avastin+/-Tarceva	Phase 3	Colorectal cancer;Lung cancer;Metastatic tumour;Ovarian cancer;Retinopathy;Solid tumour/cancer;Vascular system developmental anomaly;Breast cancer;Hypopharyngeal cancer;Liver cancer;Lymphoma;Malignant haematopoietic neoplasm;Nasopharyngeal cancer;Rheumatoid arthritis;Muscular atrophy;Fallopian tube cancer;Peritoneal cancer;Bone growth disorder;Circulatory system disease;Corneal disease;Fibrosis;M…
T20761	VEGFA	Successful target	D0C9ET	Aflibercept	Approved	Colorectal cancer;Lung cancer;Metastatic tumour;Ovarian cancer;Retinopathy;Solid tumour/cancer;Vascular system developmental anomaly;Breast cancer;Hypopharyngeal cancer;Liver cancer;Lymphoma;Malignant haematopoietic neoplasm;Nasopharyngeal cancer;Rheumatoid arthritis;Muscular atrophy;Fallopian tube cancer;Peritoneal cancer;Bone growth disorder;Circulatory system disease;Corneal disease;Fibrosis;M…
T20761	VEGFA	Successful target	D0CE1R	Antibodie derivative 7	Patented	Colorectal cancer;Lung cancer;Metastatic tumour;Ovarian cancer;Retinopathy;Solid tumour/cancer;Vascular system developmental anomaly;Breast cancer;Hypopharyngeal cancer;Liver cancer;Lymphoma;Malignant haematopoietic neoplasm;Nasopharyngeal cancer;Rheumatoid arthritis;Muscular atrophy;Fallopian tube cancer;Peritoneal cancer;Bone growth disorder;Circulatory system disease;Corneal disease;Fibrosis;M…
T20761	VEGFA	Successful target	D0CJ7Z	Abicipar pegol	Phase 2	Colorectal cancer;Lung cancer;Metastatic tumour;Ovarian cancer;Retinopathy;Solid tumour/cancer;Vascular system developmental anomaly;Breast cancer;Hypopharyngeal cancer;Liver cancer;Lymphoma;Malignant haematopoietic neoplasm;Nasopharyngeal cancer;Rheumatoid arthritis;Muscular atrophy;Fallopian tube cancer;Peritoneal cancer;Bone growth disorder;Circulatory system disease;Corneal disease;Fibrosis;M…
T20761	VEGFA	Successful target	D0D0AX	Antibodie derivative 2	Patented	Colorectal cancer;Lung cancer;Metastatic tumour;Ovarian cancer;Retinopathy;Solid tumour/cancer;Vascular system developmental anomaly;Breast cancer;Hypopharyngeal cancer;Liver cancer;Lymphoma;Malignant haematopoietic neoplasm;Nasopharyngeal cancer;Rheumatoid arthritis;Muscular atrophy;Fallopian tube cancer;Peritoneal cancer;Bone growth disorder;Circulatory system disease;Corneal disease;Fibrosis;M…
T20761	VEGFA	Successful target	D0D7SL	Pyridine derivative 3	Patented	Colorectal cancer;Lung cancer;Metastatic tumour;Ovarian cancer;Retinopathy;Solid tumour/cancer;Vascular system developmental anomaly;Breast cancer;Hypopharyngeal cancer;Liver cancer;Lymphoma;Malignant haematopoietic neoplasm;Nasopharyngeal cancer;Rheumatoid arthritis;Muscular atrophy;Fallopian tube cancer;Peritoneal cancer;Bone growth disorder;Circulatory system disease;Corneal disease;Fibrosis;M…
T20761	VEGFA	Successful target	D0DA6B	Pyridine derivative 8	Patented	Colorectal cancer;Lung cancer;Metastatic tumour;Ovarian cancer;Retinopathy;Solid tumour/cancer;Vascular system developmental anomaly;Breast cancer;Hypopharyngeal cancer;Liver cancer;Lymphoma;Malignant haematopoietic neoplasm;Nasopharyngeal cancer;Rheumatoid arthritis;Muscular atrophy;Fallopian tube cancer;Peritoneal cancer;Bone growth disorder;Circulatory system disease;Corneal disease;Fibrosis;M…
T20761	VEGFA	Successful target	D0DI5S	Carbamide derivative 19	Patented	Colorectal cancer;Lung cancer;Metastatic tumour;Ovarian cancer;Retinopathy;Solid tumour/cancer;Vascular system developmental anomaly;Breast cancer;Hypopharyngeal cancer;Liver cancer;Lymphoma;Malignant haematopoietic neoplasm;Nasopharyngeal cancer;Rheumatoid arthritis;Muscular atrophy;Fallopian tube cancer;Peritoneal cancer;Bone growth disorder;Circulatory system disease;Corneal disease;Fibrosis;M…
T20761	VEGFA	Successful target	D0E5IJ	Indoline derivative 13	Patented	Colorectal cancer;Lung cancer;Metastatic tumour;Ovarian cancer;Retinopathy;Solid tumour/cancer;Vascular system developmental anomaly;Breast cancer;Hypopharyngeal cancer;Liver cancer;Lymphoma;Malignant haematopoietic neoplasm;Nasopharyngeal cancer;Rheumatoid arthritis;Muscular atrophy;Fallopian tube cancer;Peritoneal cancer;Bone growth disorder;Circulatory system disease;Corneal disease;Fibrosis;M…
T20761	VEGFA	Successful target	D0E7RQ	SNN-0029	Phase 1/2	Colorectal cancer;Lung cancer;Metastatic tumour;Ovarian cancer;Retinopathy;Solid tumour/cancer;Vascular system developmental anomaly;Breast cancer;Hypopharyngeal cancer;Liver cancer;Lymphoma;Malignant haematopoietic neoplasm;Nasopharyngeal cancer;Rheumatoid arthritis;Muscular atrophy;Fallopian tube cancer;Peritoneal cancer;Bone growth disorder;Circulatory system disease;Corneal disease;Fibrosis;M…
T20761	VEGFA	Successful target	D0EE3P	Pyrimidine derivative 11	Patented	Colorectal cancer;Lung cancer;Metastatic tumour;Ovarian cancer;Retinopathy;Solid tumour/cancer;Vascular system developmental anomaly;Breast cancer;Hypopharyngeal cancer;Liver cancer;Lymphoma;Malignant haematopoietic neoplasm;Nasopharyngeal cancer;Rheumatoid arthritis;Muscular atrophy;Fallopian tube cancer;Peritoneal cancer;Bone growth disorder;Circulatory system disease;Corneal disease;Fibrosis;M…
T20761	VEGFA	Successful target	D0FK5P	Pyrimidine derivative 8	Patented	Colorectal cancer;Lung cancer;Metastatic tumour;Ovarian cancer;Retinopathy;Solid tumour/cancer;Vascular system developmental anomaly;Breast cancer;Hypopharyngeal cancer;Liver cancer;Lymphoma;Malignant haematopoietic neoplasm;Nasopharyngeal cancer;Rheumatoid arthritis;Muscular atrophy;Fallopian tube cancer;Peritoneal cancer;Bone growth disorder;Circulatory system disease;Corneal disease;Fibrosis;M…
T20761	VEGFA	Successful target	D0FK6Y	Quinoline and quinazoline derivative 10	Patented	Colorectal cancer;Lung cancer;Metastatic tumour;Ovarian cancer;Retinopathy;Solid tumour/cancer;Vascular system developmental anomaly;Breast cancer;Hypopharyngeal cancer;Liver cancer;Lymphoma;Malignant haematopoietic neoplasm;Nasopharyngeal cancer;Rheumatoid arthritis;Muscular atrophy;Fallopian tube cancer;Peritoneal cancer;Bone growth disorder;Circulatory system disease;Corneal disease;Fibrosis;M…
T20761	VEGFA	Successful target	D0FL6P	Quinoline and quinazoline derivative 8	Patented	Colorectal cancer;Lung cancer;Metastatic tumour;Ovarian cancer;Retinopathy;Solid tumour/cancer;Vascular system developmental anomaly;Breast cancer;Hypopharyngeal cancer;Liver cancer;Lymphoma;Malignant haematopoietic neoplasm;Nasopharyngeal cancer;Rheumatoid arthritis;Muscular atrophy;Fallopian tube cancer;Peritoneal cancer;Bone growth disorder;Circulatory system disease;Corneal disease;Fibrosis;M…
T20761	VEGFA	Successful target	D0FY2Q	Pyridine derivative 10	Patented	Colorectal cancer;Lung cancer;Metastatic tumour;Ovarian cancer;Retinopathy;Solid tumour/cancer;Vascular system developmental anomaly;Breast cancer;Hypopharyngeal cancer;Liver cancer;Lymphoma;Malignant haematopoietic neoplasm;Nasopharyngeal cancer;Rheumatoid arthritis;Muscular atrophy;Fallopian tube cancer;Peritoneal cancer;Bone growth disorder;Circulatory system disease;Corneal disease;Fibrosis;M…
T20761	VEGFA	Successful target	D0HO5B	Indoline derivative 14	Patented	Colorectal cancer;Lung cancer;Metastatic tumour;Ovarian cancer;Retinopathy;Solid tumour/cancer;Vascular system developmental anomaly;Breast cancer;Hypopharyngeal cancer;Liver cancer;Lymphoma;Malignant haematopoietic neoplasm;Nasopharyngeal cancer;Rheumatoid arthritis;Muscular atrophy;Fallopian tube cancer;Peritoneal cancer;Bone growth disorder;Circulatory system disease;Corneal disease;Fibrosis;M…
T20761	VEGFA	Successful target	D0HX9S	PMID28621580-Compound-WO2014079545C69	Patented	Colorectal cancer;Lung cancer;Metastatic tumour;Ovarian cancer;Retinopathy;Solid tumour/cancer;Vascular system developmental anomaly;Breast cancer;Hypopharyngeal cancer;Liver cancer;Lymphoma;Malignant haematopoietic neoplasm;Nasopharyngeal cancer;Rheumatoid arthritis;Muscular atrophy;Fallopian tube cancer;Peritoneal cancer;Bone growth disorder;Circulatory system disease;Corneal disease;Fibrosis;M…
T20761	VEGFA	Successful target	D0I6WJ	Carbamide derivative 14	Patented	Colorectal cancer;Lung cancer;Metastatic tumour;Ovarian cancer;Retinopathy;Solid tumour/cancer;Vascular system developmental anomaly;Breast cancer;Hypopharyngeal cancer;Liver cancer;Lymphoma;Malignant haematopoietic neoplasm;Nasopharyngeal cancer;Rheumatoid arthritis;Muscular atrophy;Fallopian tube cancer;Peritoneal cancer;Bone growth disorder;Circulatory system disease;Corneal disease;Fibrosis;M…
T20761	VEGFA	Successful target	D0I8YS	RO5520985	Phase 2	Colorectal cancer;Lung cancer;Metastatic tumour;Ovarian cancer;Retinopathy;Solid tumour/cancer;Vascular system developmental anomaly;Breast cancer;Hypopharyngeal cancer;Liver cancer;Lymphoma;Malignant haematopoietic neoplasm;Nasopharyngeal cancer;Rheumatoid arthritis;Muscular atrophy;Fallopian tube cancer;Peritoneal cancer;Bone growth disorder;Circulatory system disease;Corneal disease;Fibrosis;M…
T20761	VEGFA	Successful target	D0IZ8B	Pyridine derivative 11	Patented	Colorectal cancer;Lung cancer;Metastatic tumour;Ovarian cancer;Retinopathy;Solid tumour/cancer;Vascular system developmental anomaly;Breast cancer;Hypopharyngeal cancer;Liver cancer;Lymphoma;Malignant haematopoietic neoplasm;Nasopharyngeal cancer;Rheumatoid arthritis;Muscular atrophy;Fallopian tube cancer;Peritoneal cancer;Bone growth disorder;Circulatory system disease;Corneal disease;Fibrosis;M…
T20761	VEGFA	Successful target	D0KW0F	Pyridine derivative 9	Patented	Colorectal cancer;Lung cancer;Metastatic tumour;Ovarian cancer;Retinopathy;Solid tumour/cancer;Vascular system developmental anomaly;Breast cancer;Hypopharyngeal cancer;Liver cancer;Lymphoma;Malignant haematopoietic neoplasm;Nasopharyngeal cancer;Rheumatoid arthritis;Muscular atrophy;Fallopian tube cancer;Peritoneal cancer;Bone growth disorder;Circulatory system disease;Corneal disease;Fibrosis;M…
T20761	VEGFA	Successful target	D0M2XJ	Quinoline and quinazoline derivative 5	Patented	Colorectal cancer;Lung cancer;Metastatic tumour;Ovarian cancer;Retinopathy;Solid tumour/cancer;Vascular system developmental anomaly;Breast cancer;Hypopharyngeal cancer;Liver cancer;Lymphoma;Malignant haematopoietic neoplasm;Nasopharyngeal cancer;Rheumatoid arthritis;Muscular atrophy;Fallopian tube cancer;Peritoneal cancer;Bone growth disorder;Circulatory system disease;Corneal disease;Fibrosis;M…
T20761	VEGFA	Successful target	D0M9KZ	Pyridine derivative 4	Patented	Colorectal cancer;Lung cancer;Metastatic tumour;Ovarian cancer;Retinopathy;Solid tumour/cancer;Vascular system developmental anomaly;Breast cancer;Hypopharyngeal cancer;Liver cancer;Lymphoma;Malignant haematopoietic neoplasm;Nasopharyngeal cancer;Rheumatoid arthritis;Muscular atrophy;Fallopian tube cancer;Peritoneal cancer;Bone growth disorder;Circulatory system disease;Corneal disease;Fibrosis;M…
T20761	VEGFA	Successful target	D0MA6I	Quinoline and quinazoline derivative 3	Patented	Colorectal cancer;Lung cancer;Metastatic tumour;Ovarian cancer;Retinopathy;Solid tumour/cancer;Vascular system developmental anomaly;Breast cancer;Hypopharyngeal cancer;Liver cancer;Lymphoma;Malignant haematopoietic neoplasm;Nasopharyngeal cancer;Rheumatoid arthritis;Muscular atrophy;Fallopian tube cancer;Peritoneal cancer;Bone growth disorder;Circulatory system disease;Corneal disease;Fibrosis;M…
T20761	VEGFA	Successful target	D0ME7Q	MP0250	Phase 1/2	Colorectal cancer;Lung cancer;Metastatic tumour;Ovarian cancer;Retinopathy;Solid tumour/cancer;Vascular system developmental anomaly;Breast cancer;Hypopharyngeal cancer;Liver cancer;Lymphoma;Malignant haematopoietic neoplasm;Nasopharyngeal cancer;Rheumatoid arthritis;Muscular atrophy;Fallopian tube cancer;Peritoneal cancer;Bone growth disorder;Circulatory system disease;Corneal disease;Fibrosis;M…
T20761	VEGFA	Successful target	D0NO1A	AT001/r84	Phase 1	Colorectal cancer;Lung cancer;Metastatic tumour;Ovarian cancer;Retinopathy;Solid tumour/cancer;Vascular system developmental anomaly;Breast cancer;Hypopharyngeal cancer;Liver cancer;Lymphoma;Malignant haematopoietic neoplasm;Nasopharyngeal cancer;Rheumatoid arthritis;Muscular atrophy;Fallopian tube cancer;Peritoneal cancer;Bone growth disorder;Circulatory system disease;Corneal disease;Fibrosis;M…
T20761	VEGFA	Successful target	D0O5IA	Quinoline and quinazoline derivative 2	Patented	Colorectal cancer;Lung cancer;Metastatic tumour;Ovarian cancer;Retinopathy;Solid tumour/cancer;Vascular system developmental anomaly;Breast cancer;Hypopharyngeal cancer;Liver cancer;Lymphoma;Malignant haematopoietic neoplasm;Nasopharyngeal cancer;Rheumatoid arthritis;Muscular atrophy;Fallopian tube cancer;Peritoneal cancer;Bone growth disorder;Circulatory system disease;Corneal disease;Fibrosis;M…
T20761	VEGFA	Successful target	D0O8RZ	Indoline derivative 17	Patented	Colorectal cancer;Lung cancer;Metastatic tumour;Ovarian cancer;Retinopathy;Solid tumour/cancer;Vascular system developmental anomaly;Breast cancer;Hypopharyngeal cancer;Liver cancer;Lymphoma;Malignant haematopoietic neoplasm;Nasopharyngeal cancer;Rheumatoid arthritis;Muscular atrophy;Fallopian tube cancer;Peritoneal cancer;Bone growth disorder;Circulatory system disease;Corneal disease;Fibrosis;M…
T20761	VEGFA	Successful target	D0P4KU	ABI-011	Phase 1	Colorectal cancer;Lung cancer;Metastatic tumour;Ovarian cancer;Retinopathy;Solid tumour/cancer;Vascular system developmental anomaly;Breast cancer;Hypopharyngeal cancer;Liver cancer;Lymphoma;Malignant haematopoietic neoplasm;Nasopharyngeal cancer;Rheumatoid arthritis;Muscular atrophy;Fallopian tube cancer;Peritoneal cancer;Bone growth disorder;Circulatory system disease;Corneal disease;Fibrosis;M…
T20761	VEGFA	Successful target	D0Q4XV	Indoline derivative 19	Patented	Colorectal cancer;Lung cancer;Metastatic tumour;Ovarian cancer;Retinopathy;Solid tumour/cancer;Vascular system developmental anomaly;Breast cancer;Hypopharyngeal cancer;Liver cancer;Lymphoma;Malignant haematopoietic neoplasm;Nasopharyngeal cancer;Rheumatoid arthritis;Muscular atrophy;Fallopian tube cancer;Peritoneal cancer;Bone growth disorder;Circulatory system disease;Corneal disease;Fibrosis;M…
T20761	VEGFA	Successful target	D0S4XH	Pyridine derivative 6	Patented	Colorectal cancer;Lung cancer;Metastatic tumour;Ovarian cancer;Retinopathy;Solid tumour/cancer;Vascular system developmental anomaly;Breast cancer;Hypopharyngeal cancer;Liver cancer;Lymphoma;Malignant haematopoietic neoplasm;Nasopharyngeal cancer;Rheumatoid arthritis;Muscular atrophy;Fallopian tube cancer;Peritoneal cancer;Bone growth disorder;Circulatory system disease;Corneal disease;Fibrosis;M…
T20761	VEGFA	Successful target	D0SH2Y	Quinoline and quinazoline derivative 9	Patented	Colorectal cancer;Lung cancer;Metastatic tumour;Ovarian cancer;Retinopathy;Solid tumour/cancer;Vascular system developmental anomaly;Breast cancer;Hypopharyngeal cancer;Liver cancer;Lymphoma;Malignant haematopoietic neoplasm;Nasopharyngeal cancer;Rheumatoid arthritis;Muscular atrophy;Fallopian tube cancer;Peritoneal cancer;Bone growth disorder;Circulatory system disease;Corneal disease;Fibrosis;M…
T20761	VEGFA	Successful target	D0T1GG	3-phenyl-5-ureidoisothiazole-4-carboximide and 3-amino-5-phenylisothiazole derivative 1	Patented	Colorectal cancer;Lung cancer;Metastatic tumour;Ovarian cancer;Retinopathy;Solid tumour/cancer;Vascular system developmental anomaly;Breast cancer;Hypopharyngeal cancer;Liver cancer;Lymphoma;Malignant haematopoietic neoplasm;Nasopharyngeal cancer;Rheumatoid arthritis;Muscular atrophy;Fallopian tube cancer;Peritoneal cancer;Bone growth disorder;Circulatory system disease;Corneal disease;Fibrosis;M…
T20761	VEGFA	Successful target	D0T9DV	PMID28621580-Compound-WO2013036866C66	Patented	Colorectal cancer;Lung cancer;Metastatic tumour;Ovarian cancer;Retinopathy;Solid tumour/cancer;Vascular system developmental anomaly;Breast cancer;Hypopharyngeal cancer;Liver cancer;Lymphoma;Malignant haematopoietic neoplasm;Nasopharyngeal cancer;Rheumatoid arthritis;Muscular atrophy;Fallopian tube cancer;Peritoneal cancer;Bone growth disorder;Circulatory system disease;Corneal disease;Fibrosis;M…
T20761	VEGFA	Successful target	D0U6PW	Antibodie derivative 8	Patented	Colorectal cancer;Lung cancer;Metastatic tumour;Ovarian cancer;Retinopathy;Solid tumour/cancer;Vascular system developmental anomaly;Breast cancer;Hypopharyngeal cancer;Liver cancer;Lymphoma;Malignant haematopoietic neoplasm;Nasopharyngeal cancer;Rheumatoid arthritis;Muscular atrophy;Fallopian tube cancer;Peritoneal cancer;Bone growth disorder;Circulatory system disease;Corneal disease;Fibrosis;M…
T20761	VEGFA	Successful target	D0V3HP	MP-0112	Phase 1	Colorectal cancer;Lung cancer;Metastatic tumour;Ovarian cancer;Retinopathy;Solid tumour/cancer;Vascular system developmental anomaly;Breast cancer;Hypopharyngeal cancer;Liver cancer;Lymphoma;Malignant haematopoietic neoplasm;Nasopharyngeal cancer;Rheumatoid arthritis;Muscular atrophy;Fallopian tube cancer;Peritoneal cancer;Bone growth disorder;Circulatory system disease;Corneal disease;Fibrosis;M…
T20761	VEGFA	Successful target	D0V7OF	Pyrimidine derivative 6	Patented	Colorectal cancer;Lung cancer;Metastatic tumour;Ovarian cancer;Retinopathy;Solid tumour/cancer;Vascular system developmental anomaly;Breast cancer;Hypopharyngeal cancer;Liver cancer;Lymphoma;Malignant haematopoietic neoplasm;Nasopharyngeal cancer;Rheumatoid arthritis;Muscular atrophy;Fallopian tube cancer;Peritoneal cancer;Bone growth disorder;Circulatory system disease;Corneal disease;Fibrosis;M…
T20761	VEGFA	Successful target	D0VI1V	Carbamide derivative 20	Patented	Colorectal cancer;Lung cancer;Metastatic tumour;Ovarian cancer;Retinopathy;Solid tumour/cancer;Vascular system developmental anomaly;Breast cancer;Hypopharyngeal cancer;Liver cancer;Lymphoma;Malignant haematopoietic neoplasm;Nasopharyngeal cancer;Rheumatoid arthritis;Muscular atrophy;Fallopian tube cancer;Peritoneal cancer;Bone growth disorder;Circulatory system disease;Corneal disease;Fibrosis;M…
T20761	VEGFA	Successful target	D0VX5Y	Indoline derivative 15	Patented	Colorectal cancer;Lung cancer;Metastatic tumour;Ovarian cancer;Retinopathy;Solid tumour/cancer;Vascular system developmental anomaly;Breast cancer;Hypopharyngeal cancer;Liver cancer;Lymphoma;Malignant haematopoietic neoplasm;Nasopharyngeal cancer;Rheumatoid arthritis;Muscular atrophy;Fallopian tube cancer;Peritoneal cancer;Bone growth disorder;Circulatory system disease;Corneal disease;Fibrosis;M…
T20761	VEGFA	Successful target	D0WL5P	Antibodie derivative 9	Patented	Colorectal cancer;Lung cancer;Metastatic tumour;Ovarian cancer;Retinopathy;Solid tumour/cancer;Vascular system developmental anomaly;Breast cancer;Hypopharyngeal cancer;Liver cancer;Lymphoma;Malignant haematopoietic neoplasm;Nasopharyngeal cancer;Rheumatoid arthritis;Muscular atrophy;Fallopian tube cancer;Peritoneal cancer;Bone growth disorder;Circulatory system disease;Corneal disease;Fibrosis;M…
T20761	VEGFA	Successful target	D0X2BP	Antibodie derivative 1	Patented	Colorectal cancer;Lung cancer;Metastatic tumour;Ovarian cancer;Retinopathy;Solid tumour/cancer;Vascular system developmental anomaly;Breast cancer;Hypopharyngeal cancer;Liver cancer;Lymphoma;Malignant haematopoietic neoplasm;Nasopharyngeal cancer;Rheumatoid arthritis;Muscular atrophy;Fallopian tube cancer;Peritoneal cancer;Bone growth disorder;Circulatory system disease;Corneal disease;Fibrosis;M…
T20761	VEGFA	Successful target	D0X2MF	Indoline derivative 20	Patented	Colorectal cancer;Lung cancer;Metastatic tumour;Ovarian cancer;Retinopathy;Solid tumour/cancer;Vascular system developmental anomaly;Breast cancer;Hypopharyngeal cancer;Liver cancer;Lymphoma;Malignant haematopoietic neoplasm;Nasopharyngeal cancer;Rheumatoid arthritis;Muscular atrophy;Fallopian tube cancer;Peritoneal cancer;Bone growth disorder;Circulatory system disease;Corneal disease;Fibrosis;M…
T20761	VEGFA	Successful target	D0XS0Z	Carbamide derivative 21	Patented	Colorectal cancer;Lung cancer;Metastatic tumour;Ovarian cancer;Retinopathy;Solid tumour/cancer;Vascular system developmental anomaly;Breast cancer;Hypopharyngeal cancer;Liver cancer;Lymphoma;Malignant haematopoietic neoplasm;Nasopharyngeal cancer;Rheumatoid arthritis;Muscular atrophy;Fallopian tube cancer;Peritoneal cancer;Bone growth disorder;Circulatory system disease;Corneal disease;Fibrosis;M…
T20761	VEGFA	Successful target	D0Y2IV	Antibodie derivative 4	Patented	Colorectal cancer;Lung cancer;Metastatic tumour;Ovarian cancer;Retinopathy;Solid tumour/cancer;Vascular system developmental anomaly;Breast cancer;Hypopharyngeal cancer;Liver cancer;Lymphoma;Malignant haematopoietic neoplasm;Nasopharyngeal cancer;Rheumatoid arthritis;Muscular atrophy;Fallopian tube cancer;Peritoneal cancer;Bone growth disorder;Circulatory system disease;Corneal disease;Fibrosis;M…
T20761	VEGFA	Successful target	D0YZ4T	SFLT-01	Phase 1	Colorectal cancer;Lung cancer;Metastatic tumour;Ovarian cancer;Retinopathy;Solid tumour/cancer;Vascular system developmental anomaly;Breast cancer;Hypopharyngeal cancer;Liver cancer;Lymphoma;Malignant haematopoietic neoplasm;Nasopharyngeal cancer;Rheumatoid arthritis;Muscular atrophy;Fallopian tube cancer;Peritoneal cancer;Bone growth disorder;Circulatory system disease;Corneal disease;Fibrosis;M…
T20761	VEGFA	Successful target	D0Z0SY	Indoline derivative 12	Patented	Colorectal cancer;Lung cancer;Metastatic tumour;Ovarian cancer;Retinopathy;Solid tumour/cancer;Vascular system developmental anomaly;Breast cancer;Hypopharyngeal cancer;Liver cancer;Lymphoma;Malignant haematopoietic neoplasm;Nasopharyngeal cancer;Rheumatoid arthritis;Muscular atrophy;Fallopian tube cancer;Peritoneal cancer;Bone growth disorder;Circulatory system disease;Corneal disease;Fibrosis;M…
T20761	VEGFA	Successful target	D0ZE2J	Oxetane 3,3-dicarboxamide compound 2	Patented	Colorectal cancer;Lung cancer;Metastatic tumour;Ovarian cancer;Retinopathy;Solid tumour/cancer;Vascular system developmental anomaly;Breast cancer;Hypopharyngeal cancer;Liver cancer;Lymphoma;Malignant haematopoietic neoplasm;Nasopharyngeal cancer;Rheumatoid arthritis;Muscular atrophy;Fallopian tube cancer;Peritoneal cancer;Bone growth disorder;Circulatory system disease;Corneal disease;Fibrosis;M…
T20761	VEGFA	Successful target	D5DO9L	Brolucizumab	Approved	Colorectal cancer;Lung cancer;Metastatic tumour;Ovarian cancer;Retinopathy;Solid tumour/cancer;Vascular system developmental anomaly;Breast cancer;Hypopharyngeal cancer;Liver cancer;Lymphoma;Malignant haematopoietic neoplasm;Nasopharyngeal cancer;Rheumatoid arthritis;Muscular atrophy;Fallopian tube cancer;Peritoneal cancer;Bone growth disorder;Circulatory system disease;Corneal disease;Fibrosis;M…
T20761	VEGFA	Successful target	D9MWL4	Faricimab	Phase 3	Colorectal cancer;Lung cancer;Metastatic tumour;Ovarian cancer;Retinopathy;Solid tumour/cancer;Vascular system developmental anomaly;Breast cancer;Hypopharyngeal cancer;Liver cancer;Lymphoma;Malignant haematopoietic neoplasm;Nasopharyngeal cancer;Rheumatoid arthritis;Muscular atrophy;Fallopian tube cancer;Peritoneal cancer;Bone growth disorder;Circulatory system disease;Corneal disease;Fibrosis;M…
T21679	HTT	Literature-reported target	D00QIJ	Huntingtin gene antisense	Preclinical	Choreiform disorder
T21679	HTT	Literature-reported target	D0V7VX	ALN-HTT	Preclinical	Choreiform disorder
T21689	APOE	Clinical trial target	D07ADU	AEM-28	Phase 2	Hyper-lipoproteinaemia;Intracerebral haemorrhage;Glaucoma
T21689	APOE	Clinical trial target	D0V6OZ	CN-105	Phase 2	Hyper-lipoproteinaemia;Intracerebral haemorrhage;Glaucoma
T22977	SOD1	Clinical trial target	D02TFB	EC-SOD	Investigative	Dissociative neurological symptom disorder;Motor neuron disease;Cerebral ischaemic stroke;Myocardial infarction;Respiratory system disease;Solid tumour/cancer;Spine/trunk injury;Eczema;Skin sensation disturbance;Multiple sclerosis;Cerebral ischaemia;Head injury;Neurodegenerative disorder
T22977	SOD1	Clinical trial target	D04GZS	Tempol	Phase 2	Dissociative neurological symptom disorder;Motor neuron disease;Cerebral ischaemic stroke;Myocardial infarction;Respiratory system disease;Solid tumour/cancer;Spine/trunk injury;Eczema;Skin sensation disturbance;Multiple sclerosis;Cerebral ischaemia;Head injury;Neurodegenerative disorder
T22977	SOD1	Clinical trial target	D05RTV	Superoxide dismutase	Phase 2	Dissociative neurological symptom disorder;Motor neuron disease;Cerebral ischaemic stroke;Myocardial infarction;Respiratory system disease;Solid tumour/cancer;Spine/trunk injury;Eczema;Skin sensation disturbance;Multiple sclerosis;Cerebral ischaemia;Head injury;Neurodegenerative disorder
T22977	SOD1	Clinical trial target	D05SCQ	TDI-0079	Investigative	Dissociative neurological symptom disorder;Motor neuron disease;Cerebral ischaemic stroke;Myocardial infarction;Respiratory system disease;Solid tumour/cancer;Spine/trunk injury;Eczema;Skin sensation disturbance;Multiple sclerosis;Cerebral ischaemia;Head injury;Neurodegenerative disorder
T22977	SOD1	Clinical trial target	D06VAQ	EUK-189	Phase 1	Dissociative neurological symptom disorder;Motor neuron disease;Cerebral ischaemic stroke;Myocardial infarction;Respiratory system disease;Solid tumour/cancer;Spine/trunk injury;Eczema;Skin sensation disturbance;Multiple sclerosis;Cerebral ischaemia;Head injury;Neurodegenerative disorder
T22977	SOD1	Clinical trial target	D06WPM	Coprexa	Phase 3	Dissociative neurological symptom disorder;Motor neuron disease;Cerebral ischaemic stroke;Myocardial infarction;Respiratory system disease;Solid tumour/cancer;Spine/trunk injury;Eczema;Skin sensation disturbance;Multiple sclerosis;Cerebral ischaemia;Head injury;Neurodegenerative disorder
T22977	SOD1	Clinical trial target	D09IUR	Midismase	Phase 2	Dissociative neurological symptom disorder;Motor neuron disease;Cerebral ischaemic stroke;Myocardial infarction;Respiratory system disease;Solid tumour/cancer;Spine/trunk injury;Eczema;Skin sensation disturbance;Multiple sclerosis;Cerebral ischaemia;Head injury;Neurodegenerative disorder
T22977	SOD1	Clinical trial target	D0BT4P	TDI-0060	Investigative	Dissociative neurological symptom disorder;Motor neuron disease;Cerebral ischaemic stroke;Myocardial infarction;Respiratory system disease;Solid tumour/cancer;Spine/trunk injury;Eczema;Skin sensation disturbance;Multiple sclerosis;Cerebral ischaemia;Head injury;Neurodegenerative disorder
T22977	SOD1	Clinical trial target	D0D9NZ	Methoxyestradiol	Phase 2	Dissociative neurological symptom disorder;Motor neuron disease;Cerebral ischaemic stroke;Myocardial infarction;Respiratory system disease;Solid tumour/cancer;Spine/trunk injury;Eczema;Skin sensation disturbance;Multiple sclerosis;Cerebral ischaemia;Head injury;Neurodegenerative disorder
T22977	SOD1	Clinical trial target	D0F2ME	Acetate Ion	Investigative	Dissociative neurological symptom disorder;Motor neuron disease;Cerebral ischaemic stroke;Myocardial infarction;Respiratory system disease;Solid tumour/cancer;Spine/trunk injury;Eczema;Skin sensation disturbance;Multiple sclerosis;Cerebral ischaemia;Head injury;Neurodegenerative disorder
T22977	SOD1	Clinical trial target	D0G1EH	AEOL-10150	Preclinical	Dissociative neurological symptom disorder;Motor neuron disease;Cerebral ischaemic stroke;Myocardial infarction;Respiratory system disease;Solid tumour/cancer;Spine/trunk injury;Eczema;Skin sensation disturbance;Multiple sclerosis;Cerebral ischaemia;Head injury;Neurodegenerative disorder
T22977	SOD1	Clinical trial target	D0HE9J	APN-201	Phase 1/2	Dissociative neurological symptom disorder;Motor neuron disease;Cerebral ischaemic stroke;Myocardial infarction;Respiratory system disease;Solid tumour/cancer;Spine/trunk injury;Eczema;Skin sensation disturbance;Multiple sclerosis;Cerebral ischaemia;Head injury;Neurodegenerative disorder
T22977	SOD1	Clinical trial target	D0I1CQ	BIIB067	Phase 3	Dissociative neurological symptom disorder;Motor neuron disease;Cerebral ischaemic stroke;Myocardial infarction;Respiratory system disease;Solid tumour/cancer;Spine/trunk injury;Eczema;Skin sensation disturbance;Multiple sclerosis;Cerebral ischaemia;Head injury;Neurodegenerative disorder
T22977	SOD1	Clinical trial target	D0LE6M	VLTS-582	Investigative	Dissociative neurological symptom disorder;Motor neuron disease;Cerebral ischaemic stroke;Myocardial infarction;Respiratory system disease;Solid tumour/cancer;Spine/trunk injury;Eczema;Skin sensation disturbance;Multiple sclerosis;Cerebral ischaemia;Head injury;Neurodegenerative disorder
T22977	SOD1	Clinical trial target	D0T8MA	ATN-224	Phase 2	Dissociative neurological symptom disorder;Motor neuron disease;Cerebral ischaemic stroke;Myocardial infarction;Respiratory system disease;Solid tumour/cancer;Spine/trunk injury;Eczema;Skin sensation disturbance;Multiple sclerosis;Cerebral ischaemia;Head injury;Neurodegenerative disorder
T22977	SOD1	Clinical trial target	D0U6PJ	PC-SOD	Phase 2	Dissociative neurological symptom disorder;Motor neuron disease;Cerebral ischaemic stroke;Myocardial infarction;Respiratory system disease;Solid tumour/cancer;Spine/trunk injury;Eczema;Skin sensation disturbance;Multiple sclerosis;Cerebral ischaemia;Head injury;Neurodegenerative disorder
T22977	SOD1	Clinical trial target	D0W7DP	TDI-0107	Investigative	Dissociative neurological symptom disorder;Motor neuron disease;Cerebral ischaemic stroke;Myocardial infarction;Respiratory system disease;Solid tumour/cancer;Spine/trunk injury;Eczema;Skin sensation disturbance;Multiple sclerosis;Cerebral ischaemia;Head injury;Neurodegenerative disorder
T23212	CD14	Clinical trial target	D0UB5A	IC14	Phase 2	Sepsis
T23666	AHR	Successful target	D01PZD	Romiplostim	Approved	Multiple myeloma;Myelodysplastic syndrome;Thrombocytopenia;Atopic eczema;Psoriasis;Solid tumour/cancer;Ureteral cancer;Brain cancer;Eczema
T23666	AHR	Successful target	D0AF5P	RVT-505	Phase 2	Multiple myeloma;Myelodysplastic syndrome;Thrombocytopenia;Atopic eczema;Psoriasis;Solid tumour/cancer;Ureteral cancer;Brain cancer;Eczema
T23666	AHR	Successful target	D49AGF	CB7993113	Preclinical	Multiple myeloma;Myelodysplastic syndrome;Thrombocytopenia;Atopic eczema;Psoriasis;Solid tumour/cancer;Ureteral cancer;Brain cancer;Eczema
T23666	AHR	Successful target	D5D6ZM	IK-175	Phase 1	Multiple myeloma;Myelodysplastic syndrome;Thrombocytopenia;Atopic eczema;Psoriasis;Solid tumour/cancer;Ureteral cancer;Brain cancer;Eczema
T23666	AHR	Successful target	DFBJ28	6-Formylindolo[3,2-b]carbazole	Investigative	Multiple myeloma;Myelodysplastic syndrome;Thrombocytopenia;Atopic eczema;Psoriasis;Solid tumour/cancer;Ureteral cancer;Brain cancer;Eczema
T23666	AHR	Successful target	DL36FJ	CH-223191	Investigative	Multiple myeloma;Myelodysplastic syndrome;Thrombocytopenia;Atopic eczema;Psoriasis;Solid tumour/cancer;Ureteral cancer;Brain cancer;Eczema
T23666	AHR	Successful target	DMVR61	BAY 2416964	Phase 1	Multiple myeloma;Myelodysplastic syndrome;Thrombocytopenia;Atopic eczema;Psoriasis;Solid tumour/cancer;Ureteral cancer;Brain cancer;Eczema
T23666	AHR	Successful target	DQ3NC4	2-(1H-indole-3,-carbonyl)-thiazole-4-carboxylic acid methyl ester	Preclinical	Multiple myeloma;Myelodysplastic syndrome;Thrombocytopenia;Atopic eczema;Psoriasis;Solid tumour/cancer;Ureteral cancer;Brain cancer;Eczema
T24373	LIPA	Successful target	D0CH4A	SBC-102	Approved	Enzyme deficiency
T25956	EP300	Clinical trial target	DIY4C2	CCS1477	Phase 1/2	Solid tumour/cancer;Prostate cancer
T25956	EP300	Clinical trial target	DT8IL6	FT-7051	Phase 1	Solid tumour/cancer;Prostate cancer
T28265	SERPINA1	Successful target	D04ELD	Glassia	Approved	Emphysema;Alpha-1-antitrypsin deficiency;Chronic obstructive pulmonary disease;Cystic fibrosis;Depression
T28265	SERPINA1	Successful target	D0N5LJ	Igmesine	Phase 2	Emphysema;Alpha-1-antitrypsin deficiency;Chronic obstructive pulmonary disease;Cystic fibrosis;Depression
T28265	SERPINA1	Successful target	D0Q5FV	2-Sulfhydryl-Ethanol	Investigative	Emphysema;Alpha-1-antitrypsin deficiency;Chronic obstructive pulmonary disease;Cystic fibrosis;Depression
T28265	SERPINA1	Successful target	D0QF2W	AGTC-0106	Phase 2	Emphysema;Alpha-1-antitrypsin deficiency;Chronic obstructive pulmonary disease;Cystic fibrosis;Depression
T28265	SERPINA1	Successful target	D9EC0G	Zemaira	Approved	Emphysema;Alpha-1-antitrypsin deficiency;Chronic obstructive pulmonary disease;Cystic fibrosis;Depression
T28484	KIF11	Clinical trial target	D02AAO	AZD-4877	Phase 2	Acute myeloid leukaemia;Head and neck cancer;Multiple myeloma;Ovarian cancer;Renal cell carcinoma;Solid tumour/cancer;Lymphoma;Malignant haematopoietic neoplasm
T28484	KIF11	Clinical trial target	D04VWJ	ARRY-520	Phase 2	Acute myeloid leukaemia;Head and neck cancer;Multiple myeloma;Ovarian cancer;Renal cell carcinoma;Solid tumour/cancer;Lymphoma;Malignant haematopoietic neoplasm
T28484	KIF11	Clinical trial target	D07BKR	ARQ 621	Phase 1	Acute myeloid leukaemia;Head and neck cancer;Multiple myeloma;Ovarian cancer;Renal cell carcinoma;Solid tumour/cancer;Lymphoma;Malignant haematopoietic neoplasm
T28484	KIF11	Clinical trial target	D08OPX	4SC-205	Phase 1	Acute myeloid leukaemia;Head and neck cancer;Multiple myeloma;Ovarian cancer;Renal cell carcinoma;Solid tumour/cancer;Lymphoma;Malignant haematopoietic neoplasm
T28484	KIF11	Clinical trial target	D0PW4N	Ispinesib	Phase 2	Acute myeloid leukaemia;Head and neck cancer;Multiple myeloma;Ovarian cancer;Renal cell carcinoma;Solid tumour/cancer;Lymphoma;Malignant haematopoietic neoplasm
T28484	KIF11	Clinical trial target	D0U4EU	SB-743921	Phase 2	Acute myeloid leukaemia;Head and neck cancer;Multiple myeloma;Ovarian cancer;Renal cell carcinoma;Solid tumour/cancer;Lymphoma;Malignant haematopoietic neoplasm
T28484	KIF11	Clinical trial target	D0V2YJ	MK-0731	Phase 1	Acute myeloid leukaemia;Head and neck cancer;Multiple myeloma;Ovarian cancer;Renal cell carcinoma;Solid tumour/cancer;Lymphoma;Malignant haematopoietic neoplasm
T28484	KIF11	Clinical trial target	D0W9SL	LY2523355	Phase 2	Acute myeloid leukaemia;Head and neck cancer;Multiple myeloma;Ovarian cancer;Renal cell carcinoma;Solid tumour/cancer;Lymphoma;Malignant haematopoietic neoplasm
T28484	KIF11	Clinical trial target	D0ZK2G	Monastrol	Investigative	Acute myeloid leukaemia;Head and neck cancer;Multiple myeloma;Ovarian cancer;Renal cell carcinoma;Solid tumour/cancer;Lymphoma;Malignant haematopoietic neoplasm
T28692	LPL	Successful target	D01RNV	AMT-011	Phase 3	Hyper-lipoproteinaemia;Pregnancy/childbirth/puerperium maternal infection
T28692	LPL	Successful target	D05VIX	Gemfibrozil	Approved	Hyper-lipoproteinaemia;Pregnancy/childbirth/puerperium maternal infection
T28692	LPL	Successful target	D0J5DC	Clofibrate	Approved	Hyper-lipoproteinaemia;Pregnancy/childbirth/puerperium maternal infection
T28692	LPL	Successful target	D0OH9B	WS-070117	Investigative	Hyper-lipoproteinaemia;Pregnancy/childbirth/puerperium maternal infection
T28692	LPL	Successful target	D0SA3J	Ibrolipim	Phase 2	Hyper-lipoproteinaemia;Pregnancy/childbirth/puerperium maternal infection
T29024	SOD1	Clinical trial target	D05BYO	ISIS-SOD1	Phase 1	Motor neuron disease
T29024	SOD1	Clinical trial target	D05EJO	ISIS 150463	Investigative	Motor neuron disease
T29024	SOD1	Clinical trial target	D05RSX	ISIS 150454	Investigative	Motor neuron disease
T29024	SOD1	Clinical trial target	D07AGD	ISIS 150450	Investigative	Motor neuron disease
T29024	SOD1	Clinical trial target	D07MGX	ISIS 150451	Investigative	Motor neuron disease
T29024	SOD1	Clinical trial target	D0A3RM	ISIS 150452	Investigative	Motor neuron disease
T29024	SOD1	Clinical trial target	D0BP6T	ISIS 150464	Investigative	Motor neuron disease
T29024	SOD1	Clinical trial target	D0F4SF	ISIS 150453	Investigative	Motor neuron disease
T29130	STAT3	Successful target	D00FUZ	Quinoline carboxamide derivative 2	Patented	Psoriasis;Brain cancer;Colorectal cancer;Liver cancer;Malignant digestive organ neoplasm;Malignant haematopoietic neoplasm;Pancreatic cancer;Respiratory infection;Solid tumour/cancer;Immune system disease;Postoperative inflammation;Mature B-cell leukaemia;Multiple myeloma;Mycosis fungoides;Ulcerative colitis
T29130	STAT3	Successful target	D01BVU	Platinum IV complexe 1	Patented	Psoriasis;Brain cancer;Colorectal cancer;Liver cancer;Malignant digestive organ neoplasm;Malignant haematopoietic neoplasm;Pancreatic cancer;Respiratory infection;Solid tumour/cancer;Immune system disease;Postoperative inflammation;Mature B-cell leukaemia;Multiple myeloma;Mycosis fungoides;Ulcerative colitis
T29130	STAT3	Successful target	D01FFC	OPB-51602	Phase 1	Psoriasis;Brain cancer;Colorectal cancer;Liver cancer;Malignant digestive organ neoplasm;Malignant haematopoietic neoplasm;Pancreatic cancer;Respiratory infection;Solid tumour/cancer;Immune system disease;Postoperative inflammation;Mature B-cell leukaemia;Multiple myeloma;Mycosis fungoides;Ulcerative colitis
T29130	STAT3	Successful target	D01IGZ	Napabucasin	Phase 3	Psoriasis;Brain cancer;Colorectal cancer;Liver cancer;Malignant digestive organ neoplasm;Malignant haematopoietic neoplasm;Pancreatic cancer;Respiratory infection;Solid tumour/cancer;Immune system disease;Postoperative inflammation;Mature B-cell leukaemia;Multiple myeloma;Mycosis fungoides;Ulcerative colitis
T29130	STAT3	Successful target	D01RCM	TAK-114	Phase 1	Psoriasis;Brain cancer;Colorectal cancer;Liver cancer;Malignant digestive organ neoplasm;Malignant haematopoietic neoplasm;Pancreatic cancer;Respiratory infection;Solid tumour/cancer;Immune system disease;Postoperative inflammation;Mature B-cell leukaemia;Multiple myeloma;Mycosis fungoides;Ulcerative colitis
T29130	STAT3	Successful target	D02CJU	Peptidomimetic analog 3	Patented	Psoriasis;Brain cancer;Colorectal cancer;Liver cancer;Malignant digestive organ neoplasm;Malignant haematopoietic neoplasm;Pancreatic cancer;Respiratory infection;Solid tumour/cancer;Immune system disease;Postoperative inflammation;Mature B-cell leukaemia;Multiple myeloma;Mycosis fungoides;Ulcerative colitis
T29130	STAT3	Successful target	D02ILH	PMID26394986-Compound-11	Patented	Psoriasis;Brain cancer;Colorectal cancer;Liver cancer;Malignant digestive organ neoplasm;Malignant haematopoietic neoplasm;Pancreatic cancer;Respiratory infection;Solid tumour/cancer;Immune system disease;Postoperative inflammation;Mature B-cell leukaemia;Multiple myeloma;Mycosis fungoides;Ulcerative colitis
T29130	STAT3	Successful target	D02KDA	Flavonoid derivative 5	Patented	Psoriasis;Brain cancer;Colorectal cancer;Liver cancer;Malignant digestive organ neoplasm;Malignant haematopoietic neoplasm;Pancreatic cancer;Respiratory infection;Solid tumour/cancer;Immune system disease;Postoperative inflammation;Mature B-cell leukaemia;Multiple myeloma;Mycosis fungoides;Ulcerative colitis
T29130	STAT3	Successful target	D02MRN	Golotimod	Phase 2	Psoriasis;Brain cancer;Colorectal cancer;Liver cancer;Malignant digestive organ neoplasm;Malignant haematopoietic neoplasm;Pancreatic cancer;Respiratory infection;Solid tumour/cancer;Immune system disease;Postoperative inflammation;Mature B-cell leukaemia;Multiple myeloma;Mycosis fungoides;Ulcerative colitis
T29130	STAT3	Successful target	D03ARS	Salicylic acid derivative 6	Patented	Psoriasis;Brain cancer;Colorectal cancer;Liver cancer;Malignant digestive organ neoplasm;Malignant haematopoietic neoplasm;Pancreatic cancer;Respiratory infection;Solid tumour/cancer;Immune system disease;Postoperative inflammation;Mature B-cell leukaemia;Multiple myeloma;Mycosis fungoides;Ulcerative colitis
T29130	STAT3	Successful target	D03HEP	Gold-complexed thiosaccharide derivative 2	Patented	Psoriasis;Brain cancer;Colorectal cancer;Liver cancer;Malignant digestive organ neoplasm;Malignant haematopoietic neoplasm;Pancreatic cancer;Respiratory infection;Solid tumour/cancer;Immune system disease;Postoperative inflammation;Mature B-cell leukaemia;Multiple myeloma;Mycosis fungoides;Ulcerative colitis
T29130	STAT3	Successful target	D03VMP	Peptidomimetic analog 1	Patented	Psoriasis;Brain cancer;Colorectal cancer;Liver cancer;Malignant digestive organ neoplasm;Malignant haematopoietic neoplasm;Pancreatic cancer;Respiratory infection;Solid tumour/cancer;Immune system disease;Postoperative inflammation;Mature B-cell leukaemia;Multiple myeloma;Mycosis fungoides;Ulcerative colitis
T29130	STAT3	Successful target	D03XAK	Quinoline carboxamide derivative 1	Patented	Psoriasis;Brain cancer;Colorectal cancer;Liver cancer;Malignant digestive organ neoplasm;Malignant haematopoietic neoplasm;Pancreatic cancer;Respiratory infection;Solid tumour/cancer;Immune system disease;Postoperative inflammation;Mature B-cell leukaemia;Multiple myeloma;Mycosis fungoides;Ulcerative colitis
T29130	STAT3	Successful target	D04ANB	Salicylic acid derivative 4	Patented	Psoriasis;Brain cancer;Colorectal cancer;Liver cancer;Malignant digestive organ neoplasm;Malignant haematopoietic neoplasm;Pancreatic cancer;Respiratory infection;Solid tumour/cancer;Immune system disease;Postoperative inflammation;Mature B-cell leukaemia;Multiple myeloma;Mycosis fungoides;Ulcerative colitis
T29130	STAT3	Successful target	D04GVY	PMID26394986-Compound-12	Patented	Psoriasis;Brain cancer;Colorectal cancer;Liver cancer;Malignant digestive organ neoplasm;Malignant haematopoietic neoplasm;Pancreatic cancer;Respiratory infection;Solid tumour/cancer;Immune system disease;Postoperative inflammation;Mature B-cell leukaemia;Multiple myeloma;Mycosis fungoides;Ulcerative colitis
T29130	STAT3	Successful target	D05QDC	Acitretin	Approved	Psoriasis;Brain cancer;Colorectal cancer;Liver cancer;Malignant digestive organ neoplasm;Malignant haematopoietic neoplasm;Pancreatic cancer;Respiratory infection;Solid tumour/cancer;Immune system disease;Postoperative inflammation;Mature B-cell leukaemia;Multiple myeloma;Mycosis fungoides;Ulcerative colitis
T29130	STAT3	Successful target	D06PZK	GNF-PF-1399	Investigative	Psoriasis;Brain cancer;Colorectal cancer;Liver cancer;Malignant digestive organ neoplasm;Malignant haematopoietic neoplasm;Pancreatic cancer;Respiratory infection;Solid tumour/cancer;Immune system disease;Postoperative inflammation;Mature B-cell leukaemia;Multiple myeloma;Mycosis fungoides;Ulcerative colitis
T29130	STAT3	Successful target	D06RBL	PMID26394986-Compound-21	Patented	Psoriasis;Brain cancer;Colorectal cancer;Liver cancer;Malignant digestive organ neoplasm;Malignant haematopoietic neoplasm;Pancreatic cancer;Respiratory infection;Solid tumour/cancer;Immune system disease;Postoperative inflammation;Mature B-cell leukaemia;Multiple myeloma;Mycosis fungoides;Ulcerative colitis
T29130	STAT3	Successful target	D08-Sep	PMID26394986-Compound-43	Patented	Psoriasis;Brain cancer;Colorectal cancer;Liver cancer;Malignant digestive organ neoplasm;Malignant haematopoietic neoplasm;Pancreatic cancer;Respiratory infection;Solid tumour/cancer;Immune system disease;Postoperative inflammation;Mature B-cell leukaemia;Multiple myeloma;Mycosis fungoides;Ulcerative colitis
T29130	STAT3	Successful target	D08EID	Salicylic acid derivative 5	Patented	Psoriasis;Brain cancer;Colorectal cancer;Liver cancer;Malignant digestive organ neoplasm;Malignant haematopoietic neoplasm;Pancreatic cancer;Respiratory infection;Solid tumour/cancer;Immune system disease;Postoperative inflammation;Mature B-cell leukaemia;Multiple myeloma;Mycosis fungoides;Ulcerative colitis
T29130	STAT3	Successful target	D08ETA	PMID26394986-Compound-20	Patented	Psoriasis;Brain cancer;Colorectal cancer;Liver cancer;Malignant digestive organ neoplasm;Malignant haematopoietic neoplasm;Pancreatic cancer;Respiratory infection;Solid tumour/cancer;Immune system disease;Postoperative inflammation;Mature B-cell leukaemia;Multiple myeloma;Mycosis fungoides;Ulcerative colitis
T29130	STAT3	Successful target	D09BOL	PMID26394986-Compound-50	Patented	Psoriasis;Brain cancer;Colorectal cancer;Liver cancer;Malignant digestive organ neoplasm;Malignant haematopoietic neoplasm;Pancreatic cancer;Respiratory infection;Solid tumour/cancer;Immune system disease;Postoperative inflammation;Mature B-cell leukaemia;Multiple myeloma;Mycosis fungoides;Ulcerative colitis
T29130	STAT3	Successful target	D09CKU	PMID26394986-Compound-44	Patented	Psoriasis;Brain cancer;Colorectal cancer;Liver cancer;Malignant digestive organ neoplasm;Malignant haematopoietic neoplasm;Pancreatic cancer;Respiratory infection;Solid tumour/cancer;Immune system disease;Postoperative inflammation;Mature B-cell leukaemia;Multiple myeloma;Mycosis fungoides;Ulcerative colitis
T29130	STAT3	Successful target	D09SYX	PMID26394986-Compound-51	Patented	Psoriasis;Brain cancer;Colorectal cancer;Liver cancer;Malignant digestive organ neoplasm;Malignant haematopoietic neoplasm;Pancreatic cancer;Respiratory infection;Solid tumour/cancer;Immune system disease;Postoperative inflammation;Mature B-cell leukaemia;Multiple myeloma;Mycosis fungoides;Ulcerative colitis
T29130	STAT3	Successful target	D09ZCV	Salicylic acid derivative 3	Patented	Psoriasis;Brain cancer;Colorectal cancer;Liver cancer;Malignant digestive organ neoplasm;Malignant haematopoietic neoplasm;Pancreatic cancer;Respiratory infection;Solid tumour/cancer;Immune system disease;Postoperative inflammation;Mature B-cell leukaemia;Multiple myeloma;Mycosis fungoides;Ulcerative colitis
T29130	STAT3	Successful target	D0D8RR	Quinoline carboxamide derivative 3	Patented	Psoriasis;Brain cancer;Colorectal cancer;Liver cancer;Malignant digestive organ neoplasm;Malignant haematopoietic neoplasm;Pancreatic cancer;Respiratory infection;Solid tumour/cancer;Immune system disease;Postoperative inflammation;Mature B-cell leukaemia;Multiple myeloma;Mycosis fungoides;Ulcerative colitis
T29130	STAT3	Successful target	D0D9LJ	Atiprimod	Phase 1/2	Psoriasis;Brain cancer;Colorectal cancer;Liver cancer;Malignant digestive organ neoplasm;Malignant haematopoietic neoplasm;Pancreatic cancer;Respiratory infection;Solid tumour/cancer;Immune system disease;Postoperative inflammation;Mature B-cell leukaemia;Multiple myeloma;Mycosis fungoides;Ulcerative colitis
T29130	STAT3	Successful target	D0DC3S	Pyrazole derivative 62	Patented	Psoriasis;Brain cancer;Colorectal cancer;Liver cancer;Malignant digestive organ neoplasm;Malignant haematopoietic neoplasm;Pancreatic cancer;Respiratory infection;Solid tumour/cancer;Immune system disease;Postoperative inflammation;Mature B-cell leukaemia;Multiple myeloma;Mycosis fungoides;Ulcerative colitis
T29130	STAT3	Successful target	D0E7IM	OPB-31121	Phase 1/2	Psoriasis;Brain cancer;Colorectal cancer;Liver cancer;Malignant digestive organ neoplasm;Malignant haematopoietic neoplasm;Pancreatic cancer;Respiratory infection;Solid tumour/cancer;Immune system disease;Postoperative inflammation;Mature B-cell leukaemia;Multiple myeloma;Mycosis fungoides;Ulcerative colitis
T29130	STAT3	Successful target	D0ET3L	Pyrazole derivative 63	Patented	Psoriasis;Brain cancer;Colorectal cancer;Liver cancer;Malignant digestive organ neoplasm;Malignant haematopoietic neoplasm;Pancreatic cancer;Respiratory infection;Solid tumour/cancer;Immune system disease;Postoperative inflammation;Mature B-cell leukaemia;Multiple myeloma;Mycosis fungoides;Ulcerative colitis
T29130	STAT3	Successful target	D0EV5U	Flavonoid derivative 3	Patented	Psoriasis;Brain cancer;Colorectal cancer;Liver cancer;Malignant digestive organ neoplasm;Malignant haematopoietic neoplasm;Pancreatic cancer;Respiratory infection;Solid tumour/cancer;Immune system disease;Postoperative inflammation;Mature B-cell leukaemia;Multiple myeloma;Mycosis fungoides;Ulcerative colitis
T29130	STAT3	Successful target	D0EW9W	Peptide analog 7	Patented	Psoriasis;Brain cancer;Colorectal cancer;Liver cancer;Malignant digestive organ neoplasm;Malignant haematopoietic neoplasm;Pancreatic cancer;Respiratory infection;Solid tumour/cancer;Immune system disease;Postoperative inflammation;Mature B-cell leukaemia;Multiple myeloma;Mycosis fungoides;Ulcerative colitis
T29130	STAT3	Successful target	D0EX9O	Salicylic acid derivative 1	Patented	Psoriasis;Brain cancer;Colorectal cancer;Liver cancer;Malignant digestive organ neoplasm;Malignant haematopoietic neoplasm;Pancreatic cancer;Respiratory infection;Solid tumour/cancer;Immune system disease;Postoperative inflammation;Mature B-cell leukaemia;Multiple myeloma;Mycosis fungoides;Ulcerative colitis
T29130	STAT3	Successful target	D0EZ6V	Oxazole derivative 1	Patented	Psoriasis;Brain cancer;Colorectal cancer;Liver cancer;Malignant digestive organ neoplasm;Malignant haematopoietic neoplasm;Pancreatic cancer;Respiratory infection;Solid tumour/cancer;Immune system disease;Postoperative inflammation;Mature B-cell leukaemia;Multiple myeloma;Mycosis fungoides;Ulcerative colitis
T29130	STAT3	Successful target	D0FH4G	Gold-complexed thiosaccharide derivative 1	Patented	Psoriasis;Brain cancer;Colorectal cancer;Liver cancer;Malignant digestive organ neoplasm;Malignant haematopoietic neoplasm;Pancreatic cancer;Respiratory infection;Solid tumour/cancer;Immune system disease;Postoperative inflammation;Mature B-cell leukaemia;Multiple myeloma;Mycosis fungoides;Ulcerative colitis
T29130	STAT3	Successful target	D0H7DM	IMX-110	Phase 1/2	Psoriasis;Brain cancer;Colorectal cancer;Liver cancer;Malignant digestive organ neoplasm;Malignant haematopoietic neoplasm;Pancreatic cancer;Respiratory infection;Solid tumour/cancer;Immune system disease;Postoperative inflammation;Mature B-cell leukaemia;Multiple myeloma;Mycosis fungoides;Ulcerative colitis
T29130	STAT3	Successful target	D0IC8O	Curcumin analog 2	Patented	Psoriasis;Brain cancer;Colorectal cancer;Liver cancer;Malignant digestive organ neoplasm;Malignant haematopoietic neoplasm;Pancreatic cancer;Respiratory infection;Solid tumour/cancer;Immune system disease;Postoperative inflammation;Mature B-cell leukaemia;Multiple myeloma;Mycosis fungoides;Ulcerative colitis
T29130	STAT3	Successful target	D0IV4C	WP-1066	Phase 1/2	Psoriasis;Brain cancer;Colorectal cancer;Liver cancer;Malignant digestive organ neoplasm;Malignant haematopoietic neoplasm;Pancreatic cancer;Respiratory infection;Solid tumour/cancer;Immune system disease;Postoperative inflammation;Mature B-cell leukaemia;Multiple myeloma;Mycosis fungoides;Ulcerative colitis
T29130	STAT3	Successful target	D0J1US	Gold-complexed thiosaccharide derivative 3	Patented	Psoriasis;Brain cancer;Colorectal cancer;Liver cancer;Malignant digestive organ neoplasm;Malignant haematopoietic neoplasm;Pancreatic cancer;Respiratory infection;Solid tumour/cancer;Immune system disease;Postoperative inflammation;Mature B-cell leukaemia;Multiple myeloma;Mycosis fungoides;Ulcerative colitis
T29130	STAT3	Successful target	D0KP0U	PMID26394986-Compound-22	Patented	Psoriasis;Brain cancer;Colorectal cancer;Liver cancer;Malignant digestive organ neoplasm;Malignant haematopoietic neoplasm;Pancreatic cancer;Respiratory infection;Solid tumour/cancer;Immune system disease;Postoperative inflammation;Mature B-cell leukaemia;Multiple myeloma;Mycosis fungoides;Ulcerative colitis
T29130	STAT3	Successful target	D0M5AR	Pyrazole derivative 65	Patented	Psoriasis;Brain cancer;Colorectal cancer;Liver cancer;Malignant digestive organ neoplasm;Malignant haematopoietic neoplasm;Pancreatic cancer;Respiratory infection;Solid tumour/cancer;Immune system disease;Postoperative inflammation;Mature B-cell leukaemia;Multiple myeloma;Mycosis fungoides;Ulcerative colitis
T29130	STAT3	Successful target	D0M8OV	Pyrazole derivative 64	Patented	Psoriasis;Brain cancer;Colorectal cancer;Liver cancer;Malignant digestive organ neoplasm;Malignant haematopoietic neoplasm;Pancreatic cancer;Respiratory infection;Solid tumour/cancer;Immune system disease;Postoperative inflammation;Mature B-cell leukaemia;Multiple myeloma;Mycosis fungoides;Ulcerative colitis
T29130	STAT3	Successful target	D0MA8T	PMID26394986-Compound-42	Patented	Psoriasis;Brain cancer;Colorectal cancer;Liver cancer;Malignant digestive organ neoplasm;Malignant haematopoietic neoplasm;Pancreatic cancer;Respiratory infection;Solid tumour/cancer;Immune system disease;Postoperative inflammation;Mature B-cell leukaemia;Multiple myeloma;Mycosis fungoides;Ulcerative colitis
T29130	STAT3	Successful target	D0P7IL	GLG-801	Phase 1/2	Psoriasis;Brain cancer;Colorectal cancer;Liver cancer;Malignant digestive organ neoplasm;Malignant haematopoietic neoplasm;Pancreatic cancer;Respiratory infection;Solid tumour/cancer;Immune system disease;Postoperative inflammation;Mature B-cell leukaemia;Multiple myeloma;Mycosis fungoides;Ulcerative colitis
T29130	STAT3	Successful target	D0QR1I	Peptidomimetic analog 2	Patented	Psoriasis;Brain cancer;Colorectal cancer;Liver cancer;Malignant digestive organ neoplasm;Malignant haematopoietic neoplasm;Pancreatic cancer;Respiratory infection;Solid tumour/cancer;Immune system disease;Postoperative inflammation;Mature B-cell leukaemia;Multiple myeloma;Mycosis fungoides;Ulcerative colitis
T29130	STAT3	Successful target	D0S0UL	Pyrazole derivative 66	Patented	Psoriasis;Brain cancer;Colorectal cancer;Liver cancer;Malignant digestive organ neoplasm;Malignant haematopoietic neoplasm;Pancreatic cancer;Respiratory infection;Solid tumour/cancer;Immune system disease;Postoperative inflammation;Mature B-cell leukaemia;Multiple myeloma;Mycosis fungoides;Ulcerative colitis
T29130	STAT3	Successful target	D0T1GB	PMID26394986-Compound-52	Patented	Psoriasis;Brain cancer;Colorectal cancer;Liver cancer;Malignant digestive organ neoplasm;Malignant haematopoietic neoplasm;Pancreatic cancer;Respiratory infection;Solid tumour/cancer;Immune system disease;Postoperative inflammation;Mature B-cell leukaemia;Multiple myeloma;Mycosis fungoides;Ulcerative colitis
T29130	STAT3	Successful target	D0TU0X	PMID26394986-Compound-10	Patented	Psoriasis;Brain cancer;Colorectal cancer;Liver cancer;Malignant digestive organ neoplasm;Malignant haematopoietic neoplasm;Pancreatic cancer;Respiratory infection;Solid tumour/cancer;Immune system disease;Postoperative inflammation;Mature B-cell leukaemia;Multiple myeloma;Mycosis fungoides;Ulcerative colitis
T29130	STAT3	Successful target	D0U7LL	Salicylic acid derivative 2	Patented	Psoriasis;Brain cancer;Colorectal cancer;Liver cancer;Malignant digestive organ neoplasm;Malignant haematopoietic neoplasm;Pancreatic cancer;Respiratory infection;Solid tumour/cancer;Immune system disease;Postoperative inflammation;Mature B-cell leukaemia;Multiple myeloma;Mycosis fungoides;Ulcerative colitis
T29130	STAT3	Successful target	D0V3PA	Salicylic acid derivative 7	Patented	Psoriasis;Brain cancer;Colorectal cancer;Liver cancer;Malignant digestive organ neoplasm;Malignant haematopoietic neoplasm;Pancreatic cancer;Respiratory infection;Solid tumour/cancer;Immune system disease;Postoperative inflammation;Mature B-cell leukaemia;Multiple myeloma;Mycosis fungoides;Ulcerative colitis
T29130	STAT3	Successful target	D0V7HS	PMID26394986-Compound-53	Patented	Psoriasis;Brain cancer;Colorectal cancer;Liver cancer;Malignant digestive organ neoplasm;Malignant haematopoietic neoplasm;Pancreatic cancer;Respiratory infection;Solid tumour/cancer;Immune system disease;Postoperative inflammation;Mature B-cell leukaemia;Multiple myeloma;Mycosis fungoides;Ulcerative colitis
T29130	STAT3	Successful target	D0V7NH	Flavonoid derivative 1	Patented	Psoriasis;Brain cancer;Colorectal cancer;Liver cancer;Malignant digestive organ neoplasm;Malignant haematopoietic neoplasm;Pancreatic cancer;Respiratory infection;Solid tumour/cancer;Immune system disease;Postoperative inflammation;Mature B-cell leukaemia;Multiple myeloma;Mycosis fungoides;Ulcerative colitis
T29130	STAT3	Successful target	D0WD1Z	Curcumin analog 1	Patented	Psoriasis;Brain cancer;Colorectal cancer;Liver cancer;Malignant digestive organ neoplasm;Malignant haematopoietic neoplasm;Pancreatic cancer;Respiratory infection;Solid tumour/cancer;Immune system disease;Postoperative inflammation;Mature B-cell leukaemia;Multiple myeloma;Mycosis fungoides;Ulcerative colitis
T29130	STAT3	Successful target	D0WW1Z	PMID26394986-Compound-54	Patented	Psoriasis;Brain cancer;Colorectal cancer;Liver cancer;Malignant digestive organ neoplasm;Malignant haematopoietic neoplasm;Pancreatic cancer;Respiratory infection;Solid tumour/cancer;Immune system disease;Postoperative inflammation;Mature B-cell leukaemia;Multiple myeloma;Mycosis fungoides;Ulcerative colitis
T29130	STAT3	Successful target	D0X6QQ	Peptidomimetic analog 4	Patented	Psoriasis;Brain cancer;Colorectal cancer;Liver cancer;Malignant digestive organ neoplasm;Malignant haematopoietic neoplasm;Pancreatic cancer;Respiratory infection;Solid tumour/cancer;Immune system disease;Postoperative inflammation;Mature B-cell leukaemia;Multiple myeloma;Mycosis fungoides;Ulcerative colitis
T29130	STAT3	Successful target	D0XQ3F	Peptidomimetic analog 5	Patented	Psoriasis;Brain cancer;Colorectal cancer;Liver cancer;Malignant digestive organ neoplasm;Malignant haematopoietic neoplasm;Pancreatic cancer;Respiratory infection;Solid tumour/cancer;Immune system disease;Postoperative inflammation;Mature B-cell leukaemia;Multiple myeloma;Mycosis fungoides;Ulcerative colitis
T29130	STAT3	Successful target	D0Y0OQ	PMID26394986-Compound-13	Patented	Psoriasis;Brain cancer;Colorectal cancer;Liver cancer;Malignant digestive organ neoplasm;Malignant haematopoietic neoplasm;Pancreatic cancer;Respiratory infection;Solid tumour/cancer;Immune system disease;Postoperative inflammation;Mature B-cell leukaemia;Multiple myeloma;Mycosis fungoides;Ulcerative colitis
T29130	STAT3	Successful target	D0Y2PO	Tri-substituted purine derivative 1	Patented	Psoriasis;Brain cancer;Colorectal cancer;Liver cancer;Malignant digestive organ neoplasm;Malignant haematopoietic neoplasm;Pancreatic cancer;Respiratory infection;Solid tumour/cancer;Immune system disease;Postoperative inflammation;Mature B-cell leukaemia;Multiple myeloma;Mycosis fungoides;Ulcerative colitis
T29130	STAT3	Successful target	D0Y3DN	Flavonoid derivative 4	Patented	Psoriasis;Brain cancer;Colorectal cancer;Liver cancer;Malignant digestive organ neoplasm;Malignant haematopoietic neoplasm;Pancreatic cancer;Respiratory infection;Solid tumour/cancer;Immune system disease;Postoperative inflammation;Mature B-cell leukaemia;Multiple myeloma;Mycosis fungoides;Ulcerative colitis
T29130	STAT3	Successful target	D0Z8BD	Flavonoid derivative 2	Patented	Psoriasis;Brain cancer;Colorectal cancer;Liver cancer;Malignant digestive organ neoplasm;Malignant haematopoietic neoplasm;Pancreatic cancer;Respiratory infection;Solid tumour/cancer;Immune system disease;Postoperative inflammation;Mature B-cell leukaemia;Multiple myeloma;Mycosis fungoides;Ulcerative colitis
T29130	STAT3	Successful target	D0ZQ8T	PMID26394986-Compound-Figure16	Patented	Psoriasis;Brain cancer;Colorectal cancer;Liver cancer;Malignant digestive organ neoplasm;Malignant haematopoietic neoplasm;Pancreatic cancer;Respiratory infection;Solid tumour/cancer;Immune system disease;Postoperative inflammation;Mature B-cell leukaemia;Multiple myeloma;Mycosis fungoides;Ulcerative colitis
T29130	STAT3	Successful target	D0ZS8Q	PMID26394986-Compound-Figure17	Patented	Psoriasis;Brain cancer;Colorectal cancer;Liver cancer;Malignant digestive organ neoplasm;Malignant haematopoietic neoplasm;Pancreatic cancer;Respiratory infection;Solid tumour/cancer;Immune system disease;Postoperative inflammation;Mature B-cell leukaemia;Multiple myeloma;Mycosis fungoides;Ulcerative colitis
T29130	STAT3	Successful target	D3U8YR	WP1220	Phase 1	Psoriasis;Brain cancer;Colorectal cancer;Liver cancer;Malignant digestive organ neoplasm;Malignant haematopoietic neoplasm;Pancreatic cancer;Respiratory infection;Solid tumour/cancer;Immune system disease;Postoperative inflammation;Mature B-cell leukaemia;Multiple myeloma;Mycosis fungoides;Ulcerative colitis
T29130	STAT3	Successful target	DLJN17	DSP-0337	Phase 1	Psoriasis;Brain cancer;Colorectal cancer;Liver cancer;Malignant digestive organ neoplasm;Malignant haematopoietic neoplasm;Pancreatic cancer;Respiratory infection;Solid tumour/cancer;Immune system disease;Postoperative inflammation;Mature B-cell leukaemia;Multiple myeloma;Mycosis fungoides;Ulcerative colitis
T29130	STAT3	Successful target	DN81JB	OPB-111077	Phase 1	Psoriasis;Brain cancer;Colorectal cancer;Liver cancer;Malignant digestive organ neoplasm;Malignant haematopoietic neoplasm;Pancreatic cancer;Respiratory infection;Solid tumour/cancer;Immune system disease;Postoperative inflammation;Mature B-cell leukaemia;Multiple myeloma;Mycosis fungoides;Ulcerative colitis
T29130	STAT3	Successful target	DUI59O	NT219	Phase 1/2	Psoriasis;Brain cancer;Colorectal cancer;Liver cancer;Malignant digestive organ neoplasm;Malignant haematopoietic neoplasm;Pancreatic cancer;Respiratory infection;Solid tumour/cancer;Immune system disease;Postoperative inflammation;Mature B-cell leukaemia;Multiple myeloma;Mycosis fungoides;Ulcerative colitis
T30926	GRB2	Clinical trial target	D0L3KA	BP-100-1-01	Phase 2	Acute myeloid leukaemia;Malignant haematopoietic neoplasm;Mature B-cell lymphoma;Myelodysplastic syndrome;Myeloproliferative neoplasm
T31309	BCL2	Successful target	D00LHS	TW-37	Investigative	Breast cancer;Mature B-cell leukaemia;Motor neuron disease;Ovarian cancer;Pancreatic cancer;Solid tumour/cancer;Stomach cancer;Melanoma;Multiple myeloma;Myeloproliferative neoplasm;Ovarian dysfunction;Prostate cancer;Lung cancer;Malignant haematopoietic neoplasm;Acute myeloid leukaemia;Chronic myelomonocytic leukaemia;Follicular lymphoma;Mature B-cell lymphoma;Myelodysplastic syndrome;Psoriasis
T31309	BCL2	Successful target	D00PBX	GDC-0199	Approved	Breast cancer;Mature B-cell leukaemia;Motor neuron disease;Ovarian cancer;Pancreatic cancer;Solid tumour/cancer;Stomach cancer;Melanoma;Multiple myeloma;Myeloproliferative neoplasm;Ovarian dysfunction;Prostate cancer;Lung cancer;Malignant haematopoietic neoplasm;Acute myeloid leukaemia;Chronic myelomonocytic leukaemia;Follicular lymphoma;Mature B-cell lymphoma;Myelodysplastic syndrome;Psoriasis
T31309	BCL2	Successful target	D02OZK	Obatoclax	Phase 2	Breast cancer;Mature B-cell leukaemia;Motor neuron disease;Ovarian cancer;Pancreatic cancer;Solid tumour/cancer;Stomach cancer;Melanoma;Multiple myeloma;Myeloproliferative neoplasm;Ovarian dysfunction;Prostate cancer;Lung cancer;Malignant haematopoietic neoplasm;Acute myeloid leukaemia;Chronic myelomonocytic leukaemia;Follicular lymphoma;Mature B-cell lymphoma;Myelodysplastic syndrome;Psoriasis
T31309	BCL2	Successful target	D03UDW	AI-850	Phase 1	Breast cancer;Mature B-cell leukaemia;Motor neuron disease;Ovarian cancer;Pancreatic cancer;Solid tumour/cancer;Stomach cancer;Melanoma;Multiple myeloma;Myeloproliferative neoplasm;Ovarian dysfunction;Prostate cancer;Lung cancer;Malignant haematopoietic neoplasm;Acute myeloid leukaemia;Chronic myelomonocytic leukaemia;Follicular lymphoma;Mature B-cell lymphoma;Myelodysplastic syndrome;Psoriasis
T31309	BCL2	Successful target	D04HAA	WL-276	Investigative	Breast cancer;Mature B-cell leukaemia;Motor neuron disease;Ovarian cancer;Pancreatic cancer;Solid tumour/cancer;Stomach cancer;Melanoma;Multiple myeloma;Myeloproliferative neoplasm;Ovarian dysfunction;Prostate cancer;Lung cancer;Malignant haematopoietic neoplasm;Acute myeloid leukaemia;Chronic myelomonocytic leukaemia;Follicular lymphoma;Mature B-cell lymphoma;Myelodysplastic syndrome;Psoriasis
T31309	BCL2	Successful target	D04RTY	N-phenyl-2,3,4-trihydroxy-5-benzyl-benzamide	Investigative	Breast cancer;Mature B-cell leukaemia;Motor neuron disease;Ovarian cancer;Pancreatic cancer;Solid tumour/cancer;Stomach cancer;Melanoma;Multiple myeloma;Myeloproliferative neoplasm;Ovarian dysfunction;Prostate cancer;Lung cancer;Malignant haematopoietic neoplasm;Acute myeloid leukaemia;Chronic myelomonocytic leukaemia;Follicular lymphoma;Mature B-cell lymphoma;Myelodysplastic syndrome;Psoriasis
T31309	BCL2	Successful target	D05CHN	Irofulven/Taxotere	Phase 1	Breast cancer;Mature B-cell leukaemia;Motor neuron disease;Ovarian cancer;Pancreatic cancer;Solid tumour/cancer;Stomach cancer;Melanoma;Multiple myeloma;Myeloproliferative neoplasm;Ovarian dysfunction;Prostate cancer;Lung cancer;Malignant haematopoietic neoplasm;Acute myeloid leukaemia;Chronic myelomonocytic leukaemia;Follicular lymphoma;Mature B-cell lymphoma;Myelodysplastic syndrome;Psoriasis
T31309	BCL2	Successful target	D05RJP	Oblimersen	Phase 3	Breast cancer;Mature B-cell leukaemia;Motor neuron disease;Ovarian cancer;Pancreatic cancer;Solid tumour/cancer;Stomach cancer;Melanoma;Multiple myeloma;Myeloproliferative neoplasm;Ovarian dysfunction;Prostate cancer;Lung cancer;Malignant haematopoietic neoplasm;Acute myeloid leukaemia;Chronic myelomonocytic leukaemia;Follicular lymphoma;Mature B-cell lymphoma;Myelodysplastic syndrome;Psoriasis
T31309	BCL2	Successful target	D06AQG	5,10-Dioxy-2-phenyl-benzo[g]pteridin-4-ylamine	Investigative	Breast cancer;Mature B-cell leukaemia;Motor neuron disease;Ovarian cancer;Pancreatic cancer;Solid tumour/cancer;Stomach cancer;Melanoma;Multiple myeloma;Myeloproliferative neoplasm;Ovarian dysfunction;Prostate cancer;Lung cancer;Malignant haematopoietic neoplasm;Acute myeloid leukaemia;Chronic myelomonocytic leukaemia;Follicular lymphoma;Mature B-cell lymphoma;Myelodysplastic syndrome;Psoriasis
T31309	BCL2	Successful target	D06DLI	MCI-186	Approved	Breast cancer;Mature B-cell leukaemia;Motor neuron disease;Ovarian cancer;Pancreatic cancer;Solid tumour/cancer;Stomach cancer;Melanoma;Multiple myeloma;Myeloproliferative neoplasm;Ovarian dysfunction;Prostate cancer;Lung cancer;Malignant haematopoietic neoplasm;Acute myeloid leukaemia;Chronic myelomonocytic leukaemia;Follicular lymphoma;Mature B-cell lymphoma;Myelodysplastic syndrome;Psoriasis
T31309	BCL2	Successful target	D06ETI	ABT-263	Phase 3	Breast cancer;Mature B-cell leukaemia;Motor neuron disease;Ovarian cancer;Pancreatic cancer;Solid tumour/cancer;Stomach cancer;Melanoma;Multiple myeloma;Myeloproliferative neoplasm;Ovarian dysfunction;Prostate cancer;Lung cancer;Malignant haematopoietic neoplasm;Acute myeloid leukaemia;Chronic myelomonocytic leukaemia;Follicular lymphoma;Mature B-cell lymphoma;Myelodysplastic syndrome;Psoriasis
T31309	BCL2	Successful target	D0C2DV	Indole-based analog 2	Patented	Breast cancer;Mature B-cell leukaemia;Motor neuron disease;Ovarian cancer;Pancreatic cancer;Solid tumour/cancer;Stomach cancer;Melanoma;Multiple myeloma;Myeloproliferative neoplasm;Ovarian dysfunction;Prostate cancer;Lung cancer;Malignant haematopoietic neoplasm;Acute myeloid leukaemia;Chronic myelomonocytic leukaemia;Follicular lymphoma;Mature B-cell lymphoma;Myelodysplastic syndrome;Psoriasis
T31309	BCL2	Successful target	D0C4RB	Taxol	Approved	Breast cancer;Mature B-cell leukaemia;Motor neuron disease;Ovarian cancer;Pancreatic cancer;Solid tumour/cancer;Stomach cancer;Melanoma;Multiple myeloma;Myeloproliferative neoplasm;Ovarian dysfunction;Prostate cancer;Lung cancer;Malignant haematopoietic neoplasm;Acute myeloid leukaemia;Chronic myelomonocytic leukaemia;Follicular lymphoma;Mature B-cell lymphoma;Myelodysplastic syndrome;Psoriasis
T31309	BCL2	Successful target	D0C6YQ	BCL201	Phase 1	Breast cancer;Mature B-cell leukaemia;Motor neuron disease;Ovarian cancer;Pancreatic cancer;Solid tumour/cancer;Stomach cancer;Melanoma;Multiple myeloma;Myeloproliferative neoplasm;Ovarian dysfunction;Prostate cancer;Lung cancer;Malignant haematopoietic neoplasm;Acute myeloid leukaemia;Chronic myelomonocytic leukaemia;Follicular lymphoma;Mature B-cell lymphoma;Myelodysplastic syndrome;Psoriasis
T31309	BCL2	Successful target	D0D6BH	4,5-dibenzylbenzene-1,2-diol	Investigative	Breast cancer;Mature B-cell leukaemia;Motor neuron disease;Ovarian cancer;Pancreatic cancer;Solid tumour/cancer;Stomach cancer;Melanoma;Multiple myeloma;Myeloproliferative neoplasm;Ovarian dysfunction;Prostate cancer;Lung cancer;Malignant haematopoietic neoplasm;Acute myeloid leukaemia;Chronic myelomonocytic leukaemia;Follicular lymphoma;Mature B-cell lymphoma;Myelodysplastic syndrome;Psoriasis
T31309	BCL2	Successful target	D0I6OI	RG7601	Phase 3	Breast cancer;Mature B-cell leukaemia;Motor neuron disease;Ovarian cancer;Pancreatic cancer;Solid tumour/cancer;Stomach cancer;Melanoma;Multiple myeloma;Myeloproliferative neoplasm;Ovarian dysfunction;Prostate cancer;Lung cancer;Malignant haematopoietic neoplasm;Acute myeloid leukaemia;Chronic myelomonocytic leukaemia;Follicular lymphoma;Mature B-cell lymphoma;Myelodysplastic syndrome;Psoriasis
T31309	BCL2	Successful target	D0IS8R	PMID27744724-Compound-10	Patented	Breast cancer;Mature B-cell leukaemia;Motor neuron disease;Ovarian cancer;Pancreatic cancer;Solid tumour/cancer;Stomach cancer;Melanoma;Multiple myeloma;Myeloproliferative neoplasm;Ovarian dysfunction;Prostate cancer;Lung cancer;Malignant haematopoietic neoplasm;Acute myeloid leukaemia;Chronic myelomonocytic leukaemia;Follicular lymphoma;Mature B-cell lymphoma;Myelodysplastic syndrome;Psoriasis
T31309	BCL2	Successful target	D0J6PY	Taxol/Paraplatin/Herceptin	Phase 3	Breast cancer;Mature B-cell leukaemia;Motor neuron disease;Ovarian cancer;Pancreatic cancer;Solid tumour/cancer;Stomach cancer;Melanoma;Multiple myeloma;Myeloproliferative neoplasm;Ovarian dysfunction;Prostate cancer;Lung cancer;Malignant haematopoietic neoplasm;Acute myeloid leukaemia;Chronic myelomonocytic leukaemia;Follicular lymphoma;Mature B-cell lymphoma;Myelodysplastic syndrome;Psoriasis
T31309	BCL2	Successful target	D0J9FN	PMID27744724-Compound-21	Patented	Breast cancer;Mature B-cell leukaemia;Motor neuron disease;Ovarian cancer;Pancreatic cancer;Solid tumour/cancer;Stomach cancer;Melanoma;Multiple myeloma;Myeloproliferative neoplasm;Ovarian dysfunction;Prostate cancer;Lung cancer;Malignant haematopoietic neoplasm;Acute myeloid leukaemia;Chronic myelomonocytic leukaemia;Follicular lymphoma;Mature B-cell lymphoma;Myelodysplastic syndrome;Psoriasis
T31309	BCL2	Successful target	D0K8LB	PI-88/Taxotere	Phase 2	Breast cancer;Mature B-cell leukaemia;Motor neuron disease;Ovarian cancer;Pancreatic cancer;Solid tumour/cancer;Stomach cancer;Melanoma;Multiple myeloma;Myeloproliferative neoplasm;Ovarian dysfunction;Prostate cancer;Lung cancer;Malignant haematopoietic neoplasm;Acute myeloid leukaemia;Chronic myelomonocytic leukaemia;Follicular lymphoma;Mature B-cell lymphoma;Myelodysplastic syndrome;Psoriasis
T31309	BCL2	Successful target	D0L2YF	Pc4	Phase 1	Breast cancer;Mature B-cell leukaemia;Motor neuron disease;Ovarian cancer;Pancreatic cancer;Solid tumour/cancer;Stomach cancer;Melanoma;Multiple myeloma;Myeloproliferative neoplasm;Ovarian dysfunction;Prostate cancer;Lung cancer;Malignant haematopoietic neoplasm;Acute myeloid leukaemia;Chronic myelomonocytic leukaemia;Follicular lymphoma;Mature B-cell lymphoma;Myelodysplastic syndrome;Psoriasis
T31309	BCL2	Successful target	D0MZ7I	Indole-based analog 3	Patented	Breast cancer;Mature B-cell leukaemia;Motor neuron disease;Ovarian cancer;Pancreatic cancer;Solid tumour/cancer;Stomach cancer;Melanoma;Multiple myeloma;Myeloproliferative neoplasm;Ovarian dysfunction;Prostate cancer;Lung cancer;Malignant haematopoietic neoplasm;Acute myeloid leukaemia;Chronic myelomonocytic leukaemia;Follicular lymphoma;Mature B-cell lymphoma;Myelodysplastic syndrome;Psoriasis
T31309	BCL2	Successful target	D0S0YV	modified HA14-1 compounds (cancer)	Investigative	Breast cancer;Mature B-cell leukaemia;Motor neuron disease;Ovarian cancer;Pancreatic cancer;Solid tumour/cancer;Stomach cancer;Melanoma;Multiple myeloma;Myeloproliferative neoplasm;Ovarian dysfunction;Prostate cancer;Lung cancer;Malignant haematopoietic neoplasm;Acute myeloid leukaemia;Chronic myelomonocytic leukaemia;Follicular lymphoma;Mature B-cell lymphoma;Myelodysplastic syndrome;Psoriasis
T31309	BCL2	Successful target	D0S6IW	QEDIIRNIARHLAQVGDSMDR	Investigative	Breast cancer;Mature B-cell leukaemia;Motor neuron disease;Ovarian cancer;Pancreatic cancer;Solid tumour/cancer;Stomach cancer;Melanoma;Multiple myeloma;Myeloproliferative neoplasm;Ovarian dysfunction;Prostate cancer;Lung cancer;Malignant haematopoietic neoplasm;Acute myeloid leukaemia;Chronic myelomonocytic leukaemia;Follicular lymphoma;Mature B-cell lymphoma;Myelodysplastic syndrome;Psoriasis
T31309	BCL2	Successful target	D0TU3N	PMID27744724-Compound-18	Patented	Breast cancer;Mature B-cell leukaemia;Motor neuron disease;Ovarian cancer;Pancreatic cancer;Solid tumour/cancer;Stomach cancer;Melanoma;Multiple myeloma;Myeloproliferative neoplasm;Ovarian dysfunction;Prostate cancer;Lung cancer;Malignant haematopoietic neoplasm;Acute myeloid leukaemia;Chronic myelomonocytic leukaemia;Follicular lymphoma;Mature B-cell lymphoma;Myelodysplastic syndrome;Psoriasis
T31309	BCL2	Successful target	D0V7PX	Apogossypol	Investigative	Breast cancer;Mature B-cell leukaemia;Motor neuron disease;Ovarian cancer;Pancreatic cancer;Solid tumour/cancer;Stomach cancer;Melanoma;Multiple myeloma;Myeloproliferative neoplasm;Ovarian dysfunction;Prostate cancer;Lung cancer;Malignant haematopoietic neoplasm;Acute myeloid leukaemia;Chronic myelomonocytic leukaemia;Follicular lymphoma;Mature B-cell lymphoma;Myelodysplastic syndrome;Psoriasis
T31309	BCL2	Successful target	D0X0CS	2,3,4-trihydroxy-5-isopropyl-N-phenyl-benzamide	Investigative	Breast cancer;Mature B-cell leukaemia;Motor neuron disease;Ovarian cancer;Pancreatic cancer;Solid tumour/cancer;Stomach cancer;Melanoma;Multiple myeloma;Myeloproliferative neoplasm;Ovarian dysfunction;Prostate cancer;Lung cancer;Malignant haematopoietic neoplasm;Acute myeloid leukaemia;Chronic myelomonocytic leukaemia;Follicular lymphoma;Mature B-cell lymphoma;Myelodysplastic syndrome;Psoriasis
T31309	BCL2	Successful target	D0Z0HH	Gossypol	Phase 2	Breast cancer;Mature B-cell leukaemia;Motor neuron disease;Ovarian cancer;Pancreatic cancer;Solid tumour/cancer;Stomach cancer;Melanoma;Multiple myeloma;Myeloproliferative neoplasm;Ovarian dysfunction;Prostate cancer;Lung cancer;Malignant haematopoietic neoplasm;Acute myeloid leukaemia;Chronic myelomonocytic leukaemia;Follicular lymphoma;Mature B-cell lymphoma;Myelodysplastic syndrome;Psoriasis
T31309	BCL2	Successful target	D2Y7ZG	APG-2575	Phase 1/2	Breast cancer;Mature B-cell leukaemia;Motor neuron disease;Ovarian cancer;Pancreatic cancer;Solid tumour/cancer;Stomach cancer;Melanoma;Multiple myeloma;Myeloproliferative neoplasm;Ovarian dysfunction;Prostate cancer;Lung cancer;Malignant haematopoietic neoplasm;Acute myeloid leukaemia;Chronic myelomonocytic leukaemia;Follicular lymphoma;Mature B-cell lymphoma;Myelodysplastic syndrome;Psoriasis
T31309	BCL2	Successful target	D4WN2M	APG-1252	Phase 1/2	Breast cancer;Mature B-cell leukaemia;Motor neuron disease;Ovarian cancer;Pancreatic cancer;Solid tumour/cancer;Stomach cancer;Melanoma;Multiple myeloma;Myeloproliferative neoplasm;Ovarian dysfunction;Prostate cancer;Lung cancer;Malignant haematopoietic neoplasm;Acute myeloid leukaemia;Chronic myelomonocytic leukaemia;Follicular lymphoma;Mature B-cell lymphoma;Myelodysplastic syndrome;Psoriasis
T31309	BCL2	Successful target	D74BRK	BGB-11417	Phase 1	Breast cancer;Mature B-cell leukaemia;Motor neuron disease;Ovarian cancer;Pancreatic cancer;Solid tumour/cancer;Stomach cancer;Melanoma;Multiple myeloma;Myeloproliferative neoplasm;Ovarian dysfunction;Prostate cancer;Lung cancer;Malignant haematopoietic neoplasm;Acute myeloid leukaemia;Chronic myelomonocytic leukaemia;Follicular lymphoma;Mature B-cell lymphoma;Myelodysplastic syndrome;Psoriasis
T31309	BCL2	Successful target	DBY42T	LP-108	Phase 1	Breast cancer;Mature B-cell leukaemia;Motor neuron disease;Ovarian cancer;Pancreatic cancer;Solid tumour/cancer;Stomach cancer;Melanoma;Multiple myeloma;Myeloproliferative neoplasm;Ovarian dysfunction;Prostate cancer;Lung cancer;Malignant haematopoietic neoplasm;Acute myeloid leukaemia;Chronic myelomonocytic leukaemia;Follicular lymphoma;Mature B-cell lymphoma;Myelodysplastic syndrome;Psoriasis
T31309	BCL2	Successful target	DP63FS	VOB560	Phase 1	Breast cancer;Mature B-cell leukaemia;Motor neuron disease;Ovarian cancer;Pancreatic cancer;Solid tumour/cancer;Stomach cancer;Melanoma;Multiple myeloma;Myeloproliferative neoplasm;Ovarian dysfunction;Prostate cancer;Lung cancer;Malignant haematopoietic neoplasm;Acute myeloid leukaemia;Chronic myelomonocytic leukaemia;Follicular lymphoma;Mature B-cell lymphoma;Myelodysplastic syndrome;Psoriasis
T31309	BCL2	Successful target	DQ1P6X	AZD0466	Phase 1/2	Breast cancer;Mature B-cell leukaemia;Motor neuron disease;Ovarian cancer;Pancreatic cancer;Solid tumour/cancer;Stomach cancer;Melanoma;Multiple myeloma;Myeloproliferative neoplasm;Ovarian dysfunction;Prostate cancer;Lung cancer;Malignant haematopoietic neoplasm;Acute myeloid leukaemia;Chronic myelomonocytic leukaemia;Follicular lymphoma;Mature B-cell lymphoma;Myelodysplastic syndrome;Psoriasis
T31309	BCL2	Successful target	DY4OZ6	Thymoquinone	Phase 2/3	Breast cancer;Mature B-cell leukaemia;Motor neuron disease;Ovarian cancer;Pancreatic cancer;Solid tumour/cancer;Stomach cancer;Melanoma;Multiple myeloma;Myeloproliferative neoplasm;Ovarian dysfunction;Prostate cancer;Lung cancer;Malignant haematopoietic neoplasm;Acute myeloid leukaemia;Chronic myelomonocytic leukaemia;Follicular lymphoma;Mature B-cell lymphoma;Myelodysplastic syndrome;Psoriasis
T31818	ITGA1	Clinical trial target	D0B5VA	SAN-300	Phase 2	Rheumatoid arthritis
T31825	HBB	Clinical trial target	D0C9LQ	LentiGlobin	Phase 3	Sickle-cell disorder;Thalassaemia
T31825	HBB	Clinical trial target	D1RMS5	OTL-300	Phase 1/2	Sickle-cell disorder;Thalassaemia
T35445	SMAD3	Successful target	D06TJJ	FLUORESCEIN	Approved	Herpes simplex infection;Kidney fibrosis
T35445	SMAD3	Successful target	D0A1CM	ELLAGIC ACID	Investigative	Herpes simplex infection;Kidney fibrosis
T35445	SMAD3	Successful target	D0P0CM	GNF-PF-2272	Investigative	Herpes simplex infection;Kidney fibrosis
T35445	SMAD3	Successful target	DF90DS	SIS-3	Preclinical	Herpes simplex infection;Kidney fibrosis
T35474	KRAS	Literature-reported target	D04GPF	ISIS 6958	Investigative	Solid tumour/cancer
T35474	KRAS	Literature-reported target	D09ENF	PNT-300	Investigative	Solid tumour/cancer
T35474	KRAS	Literature-reported target	D0A4MW	ISIS 7453	Investigative	Solid tumour/cancer
T35474	KRAS	Literature-reported target	D0O2LY	ISIS 6957	Investigative	Solid tumour/cancer
T36557	PPARD	Clinical trial target	D01ARG	DB-900	Investigative	Non-alcoholic fatty liver disease;Type 2 diabetes mellitus;Autoimmune liver disease;Hyper-lipoproteinaemia;Obesity;Alzheimer disease;Dyslipidemia;Metabolic disorder;Diabetes mellitus;Central nervous system disease
T36557	PPARD	Clinical trial target	D01PVV	KD3010	Phase 1	Non-alcoholic fatty liver disease;Type 2 diabetes mellitus;Autoimmune liver disease;Hyper-lipoproteinaemia;Obesity;Alzheimer disease;Dyslipidemia;Metabolic disorder;Diabetes mellitus;Central nervous system disease
T36557	PPARD	Clinical trial target	D03OSG	MBX-8025	Phase 2/3	Non-alcoholic fatty liver disease;Type 2 diabetes mellitus;Autoimmune liver disease;Hyper-lipoproteinaemia;Obesity;Alzheimer disease;Dyslipidemia;Metabolic disorder;Diabetes mellitus;Central nervous system disease
T36557	PPARD	Clinical trial target	D04NJS	SAR351034	Phase 1	Non-alcoholic fatty liver disease;Type 2 diabetes mellitus;Autoimmune liver disease;Hyper-lipoproteinaemia;Obesity;Alzheimer disease;Dyslipidemia;Metabolic disorder;Diabetes mellitus;Central nervous system disease
T36557	PPARD	Clinical trial target	D06GFG	KD-3020	Preclinical	Non-alcoholic fatty liver disease;Type 2 diabetes mellitus;Autoimmune liver disease;Hyper-lipoproteinaemia;Obesity;Alzheimer disease;Dyslipidemia;Metabolic disorder;Diabetes mellitus;Central nervous system disease
T36557	PPARD	Clinical trial target	D06IBV	Heptyl-Beta-D-Glucopyranoside	Investigative	Non-alcoholic fatty liver disease;Type 2 diabetes mellitus;Autoimmune liver disease;Hyper-lipoproteinaemia;Obesity;Alzheimer disease;Dyslipidemia;Metabolic disorder;Diabetes mellitus;Central nervous system disease
T36557	PPARD	Clinical trial target	D06KPR	CER-002	Phase 1	Non-alcoholic fatty liver disease;Type 2 diabetes mellitus;Autoimmune liver disease;Hyper-lipoproteinaemia;Obesity;Alzheimer disease;Dyslipidemia;Metabolic disorder;Diabetes mellitus;Central nervous system disease
T36557	PPARD	Clinical trial target	D06VBQ	GSK-0660	Investigative	Non-alcoholic fatty liver disease;Type 2 diabetes mellitus;Autoimmune liver disease;Hyper-lipoproteinaemia;Obesity;Alzheimer disease;Dyslipidemia;Metabolic disorder;Diabetes mellitus;Central nervous system disease
T36557	PPARD	Clinical trial target	D07USR	SAVX-1	Investigative	Non-alcoholic fatty liver disease;Type 2 diabetes mellitus;Autoimmune liver disease;Hyper-lipoproteinaemia;Obesity;Alzheimer disease;Dyslipidemia;Metabolic disorder;Diabetes mellitus;Central nervous system disease
T36557	PPARD	Clinical trial target	D08QXD	L-783483	Investigative	Non-alcoholic fatty liver disease;Type 2 diabetes mellitus;Autoimmune liver disease;Hyper-lipoproteinaemia;Obesity;Alzheimer disease;Dyslipidemia;Metabolic disorder;Diabetes mellitus;Central nervous system disease
T36557	PPARD	Clinical trial target	D09JII	L-796449	Investigative	Non-alcoholic fatty liver disease;Type 2 diabetes mellitus;Autoimmune liver disease;Hyper-lipoproteinaemia;Obesity;Alzheimer disease;Dyslipidemia;Metabolic disorder;Diabetes mellitus;Central nervous system disease
T36557	PPARD	Clinical trial target	D0F0MP	L-165461	Investigative	Non-alcoholic fatty liver disease;Type 2 diabetes mellitus;Autoimmune liver disease;Hyper-lipoproteinaemia;Obesity;Alzheimer disease;Dyslipidemia;Metabolic disorder;Diabetes mellitus;Central nervous system disease
T36557	PPARD	Clinical trial target	D0K1TQ	GW0742X	Investigative	Non-alcoholic fatty liver disease;Type 2 diabetes mellitus;Autoimmune liver disease;Hyper-lipoproteinaemia;Obesity;Alzheimer disease;Dyslipidemia;Metabolic disorder;Diabetes mellitus;Central nervous system disease
T36557	PPARD	Clinical trial target	D0LW1Y	GFT-505	Phase 3	Non-alcoholic fatty liver disease;Type 2 diabetes mellitus;Autoimmune liver disease;Hyper-lipoproteinaemia;Obesity;Alzheimer disease;Dyslipidemia;Metabolic disorder;Diabetes mellitus;Central nervous system disease
T36557	PPARD	Clinical trial target	D0NM0G	GSK-3787	Investigative	Non-alcoholic fatty liver disease;Type 2 diabetes mellitus;Autoimmune liver disease;Hyper-lipoproteinaemia;Obesity;Alzheimer disease;Dyslipidemia;Metabolic disorder;Diabetes mellitus;Central nervous system disease
T36557	PPARD	Clinical trial target	D0V0JN	PMID25416646-Compound-Figure5-C	Patented	Non-alcoholic fatty liver disease;Type 2 diabetes mellitus;Autoimmune liver disease;Hyper-lipoproteinaemia;Obesity;Alzheimer disease;Dyslipidemia;Metabolic disorder;Diabetes mellitus;Central nervous system disease
T36557	PPARD	Clinical trial target	D0V6DE	(11E)-OCTADEC-11-ENOIC ACID	Investigative	Non-alcoholic fatty liver disease;Type 2 diabetes mellitus;Autoimmune liver disease;Hyper-lipoproteinaemia;Obesity;Alzheimer disease;Dyslipidemia;Metabolic disorder;Diabetes mellitus;Central nervous system disease
T36557	PPARD	Clinical trial target	D0XR8Q	GW2433	Investigative	Non-alcoholic fatty liver disease;Type 2 diabetes mellitus;Autoimmune liver disease;Hyper-lipoproteinaemia;Obesity;Alzheimer disease;Dyslipidemia;Metabolic disorder;Diabetes mellitus;Central nervous system disease
T36557	PPARD	Clinical trial target	D0YK9T	L-165041	Investigative	Non-alcoholic fatty liver disease;Type 2 diabetes mellitus;Autoimmune liver disease;Hyper-lipoproteinaemia;Obesity;Alzheimer disease;Dyslipidemia;Metabolic disorder;Diabetes mellitus;Central nervous system disease
T36557	PPARD	Clinical trial target	D0ZT8A	T3D-959	Phase 1/2	Non-alcoholic fatty liver disease;Type 2 diabetes mellitus;Autoimmune liver disease;Hyper-lipoproteinaemia;Obesity;Alzheimer disease;Dyslipidemia;Metabolic disorder;Diabetes mellitus;Central nervous system disease
T38087	TNKS2	Clinical trial target	D0F5TD	PMID27841036-Compound-37	Phase 2	Ovarian cancer
T38087	TNKS2	Clinical trial target	DP48WE	Stenoparib	Phase 2	Ovarian cancer
T39231	TNKS	Clinical trial target	D0F5TD	PMID27841036-Compound-37	Phase 2	Ovarian cancer
T39231	TNKS	Clinical trial target	DP48WE	Stenoparib	Phase 2	Ovarian cancer
T39977	MIF	Clinical trial target	D00YTS	AVP-13546	Investigative	Diabetes mellitus;Thrombocytopenia;Postoperative inflammation;Autoimmune disease
T39977	MIF	Clinical trial target	D01SWJ	AVP-13748	Investigative	Diabetes mellitus;Thrombocytopenia;Postoperative inflammation;Autoimmune disease
T39977	MIF	Clinical trial target	D04KKT	ISO-1	Phase 1	Diabetes mellitus;Thrombocytopenia;Postoperative inflammation;Autoimmune disease
T39977	MIF	Clinical trial target	D0A6HS	6-HYDROXY-1,3-BENZOTHIAZOLE-2-SULFONAMIDE	Investigative	Diabetes mellitus;Thrombocytopenia;Postoperative inflammation;Autoimmune disease
T39977	MIF	Clinical trial target	D0F3II	COR100140	Preclinical	Diabetes mellitus;Thrombocytopenia;Postoperative inflammation;Autoimmune disease
T39977	MIF	Clinical trial target	D0G6RI	4-hydroxyphenylpyruvic acid	Investigative	Diabetes mellitus;Thrombocytopenia;Postoperative inflammation;Autoimmune disease
T39977	MIF	Clinical trial target	D0NN3G	4-HYDROXYBENZALDEHYDE O-(CYCLOHEXYLCARBONYL)OXIME	Investigative	Diabetes mellitus;Thrombocytopenia;Postoperative inflammation;Autoimmune disease
T39977	MIF	Clinical trial target	D0O7IZ	Anti-MIF antibodies	Phase 4	Diabetes mellitus;Thrombocytopenia;Postoperative inflammation;Autoimmune disease
T39977	MIF	Clinical trial target	D0V9EN	3,4-Dihydroxycinnamic Acid	Phase 4	Diabetes mellitus;Thrombocytopenia;Postoperative inflammation;Autoimmune disease
T39977	MIF	Clinical trial target	D0W1JY	NAPQI	Investigative	Diabetes mellitus;Thrombocytopenia;Postoperative inflammation;Autoimmune disease
T40192	NFKB1	Clinical trial target	D06TZZ	CAT 1004	Phase 2	Muscular dystrophy;Solid tumour/cancer;Type 2 diabetes mellitus
T40192	NFKB1	Clinical trial target	D0V3LM	P54	Phase 2	Muscular dystrophy;Solid tumour/cancer;Type 2 diabetes mellitus
T40474	MET	Successful target	D00DRL	MK-2461	Phase 1/2	Brain cancer;Liver cancer;Lung cancer;Non-small cell lung cancer;Ovarian cancer;Solid tumour/cancer;Thyroid cancer;Chronic arterial occlusive disease;Heart disease;Renal cell carcinoma;Stomach cancer;Breast cancer;Biliary tract cancer;Cardiovascular disease;Injury;Metastatic lymph node neoplasm;Sarcoma;Alzheimer disease;Colorectal cancer;Fibrosis;Glaucoma;Head and neck cancer;Liver disease;Melano…
T40474	MET	Successful target	D00EMH	PMID21967808CR-16	Investigative	Brain cancer;Liver cancer;Lung cancer;Non-small cell lung cancer;Ovarian cancer;Solid tumour/cancer;Thyroid cancer;Chronic arterial occlusive disease;Heart disease;Renal cell carcinoma;Stomach cancer;Breast cancer;Biliary tract cancer;Cardiovascular disease;Injury;Metastatic lymph node neoplasm;Sarcoma;Alzheimer disease;Colorectal cancer;Fibrosis;Glaucoma;Head and neck cancer;Liver disease;Melano…
T40474	MET	Successful target	D00FZA	ALD-805	Investigative	Brain cancer;Liver cancer;Lung cancer;Non-small cell lung cancer;Ovarian cancer;Solid tumour/cancer;Thyroid cancer;Chronic arterial occlusive disease;Heart disease;Renal cell carcinoma;Stomach cancer;Breast cancer;Biliary tract cancer;Cardiovascular disease;Injury;Metastatic lymph node neoplasm;Sarcoma;Alzheimer disease;Colorectal cancer;Fibrosis;Glaucoma;Head and neck cancer;Liver disease;Melano…
T40474	MET	Successful target	D00TBD	PHA-665752	Investigative	Brain cancer;Liver cancer;Lung cancer;Non-small cell lung cancer;Ovarian cancer;Solid tumour/cancer;Thyroid cancer;Chronic arterial occlusive disease;Heart disease;Renal cell carcinoma;Stomach cancer;Breast cancer;Biliary tract cancer;Cardiovascular disease;Injury;Metastatic lymph node neoplasm;Sarcoma;Alzheimer disease;Colorectal cancer;Fibrosis;Glaucoma;Head and neck cancer;Liver disease;Melano…
T40474	MET	Successful target	D01FSX	REGN5093	Phase 1	Brain cancer;Liver cancer;Lung cancer;Non-small cell lung cancer;Ovarian cancer;Solid tumour/cancer;Thyroid cancer;Chronic arterial occlusive disease;Heart disease;Renal cell carcinoma;Stomach cancer;Breast cancer;Biliary tract cancer;Cardiovascular disease;Injury;Metastatic lymph node neoplasm;Sarcoma;Alzheimer disease;Colorectal cancer;Fibrosis;Glaucoma;Head and neck cancer;Liver disease;Melano…
T40474	MET	Successful target	D01IJM	LY3164530	Phase 1	Brain cancer;Liver cancer;Lung cancer;Non-small cell lung cancer;Ovarian cancer;Solid tumour/cancer;Thyroid cancer;Chronic arterial occlusive disease;Heart disease;Renal cell carcinoma;Stomach cancer;Breast cancer;Biliary tract cancer;Cardiovascular disease;Injury;Metastatic lymph node neoplasm;Sarcoma;Alzheimer disease;Colorectal cancer;Fibrosis;Glaucoma;Head and neck cancer;Liver disease;Melano…
T40474	MET	Successful target	D01LCC	PF-4217903	Phase 1	Brain cancer;Liver cancer;Lung cancer;Non-small cell lung cancer;Ovarian cancer;Solid tumour/cancer;Thyroid cancer;Chronic arterial occlusive disease;Heart disease;Renal cell carcinoma;Stomach cancer;Breast cancer;Biliary tract cancer;Cardiovascular disease;Injury;Metastatic lymph node neoplasm;Sarcoma;Alzheimer disease;Colorectal cancer;Fibrosis;Glaucoma;Head and neck cancer;Liver disease;Melano…
T40474	MET	Successful target	D01TBJ	CMX-2043	Phase 2	Brain cancer;Liver cancer;Lung cancer;Non-small cell lung cancer;Ovarian cancer;Solid tumour/cancer;Thyroid cancer;Chronic arterial occlusive disease;Heart disease;Renal cell carcinoma;Stomach cancer;Breast cancer;Biliary tract cancer;Cardiovascular disease;Injury;Metastatic lymph node neoplasm;Sarcoma;Alzheimer disease;Colorectal cancer;Fibrosis;Glaucoma;Head and neck cancer;Liver disease;Melano…
T40474	MET	Successful target	D02EOR	ABBV-399	Phase 1	Brain cancer;Liver cancer;Lung cancer;Non-small cell lung cancer;Ovarian cancer;Solid tumour/cancer;Thyroid cancer;Chronic arterial occlusive disease;Heart disease;Renal cell carcinoma;Stomach cancer;Breast cancer;Biliary tract cancer;Cardiovascular disease;Injury;Metastatic lymph node neoplasm;Sarcoma;Alzheimer disease;Colorectal cancer;Fibrosis;Glaucoma;Head and neck cancer;Liver disease;Melano…
T40474	MET	Successful target	D03GTO	C-Met/PD-L1 CAR-T Cell	Phase 1	Brain cancer;Liver cancer;Lung cancer;Non-small cell lung cancer;Ovarian cancer;Solid tumour/cancer;Thyroid cancer;Chronic arterial occlusive disease;Heart disease;Renal cell carcinoma;Stomach cancer;Breast cancer;Biliary tract cancer;Cardiovascular disease;Injury;Metastatic lymph node neoplasm;Sarcoma;Alzheimer disease;Colorectal cancer;Fibrosis;Glaucoma;Head and neck cancer;Liver disease;Melano…
T40474	MET	Successful target	D03LZK	APS-3010	Investigative	Brain cancer;Liver cancer;Lung cancer;Non-small cell lung cancer;Ovarian cancer;Solid tumour/cancer;Thyroid cancer;Chronic arterial occlusive disease;Heart disease;Renal cell carcinoma;Stomach cancer;Breast cancer;Biliary tract cancer;Cardiovascular disease;Injury;Metastatic lymph node neoplasm;Sarcoma;Alzheimer disease;Colorectal cancer;Fibrosis;Glaucoma;Head and neck cancer;Liver disease;Melano…
T40474	MET	Successful target	D03SXS	LY-2875358	Phase 2	Brain cancer;Liver cancer;Lung cancer;Non-small cell lung cancer;Ovarian cancer;Solid tumour/cancer;Thyroid cancer;Chronic arterial occlusive disease;Heart disease;Renal cell carcinoma;Stomach cancer;Breast cancer;Biliary tract cancer;Cardiovascular disease;Injury;Metastatic lymph node neoplasm;Sarcoma;Alzheimer disease;Colorectal cancer;Fibrosis;Glaucoma;Head and neck cancer;Liver disease;Melano…
T40474	MET	Successful target	D03ZBT	Crizotinib	Approved	Brain cancer;Liver cancer;Lung cancer;Non-small cell lung cancer;Ovarian cancer;Solid tumour/cancer;Thyroid cancer;Chronic arterial occlusive disease;Heart disease;Renal cell carcinoma;Stomach cancer;Breast cancer;Biliary tract cancer;Cardiovascular disease;Injury;Metastatic lymph node neoplasm;Sarcoma;Alzheimer disease;Colorectal cancer;Fibrosis;Glaucoma;Head and neck cancer;Liver disease;Melano…
T40474	MET	Successful target	D04CUA	PMID24210504C1o	Investigative	Brain cancer;Liver cancer;Lung cancer;Non-small cell lung cancer;Ovarian cancer;Solid tumour/cancer;Thyroid cancer;Chronic arterial occlusive disease;Heart disease;Renal cell carcinoma;Stomach cancer;Breast cancer;Biliary tract cancer;Cardiovascular disease;Injury;Metastatic lymph node neoplasm;Sarcoma;Alzheimer disease;Colorectal cancer;Fibrosis;Glaucoma;Head and neck cancer;Liver disease;Melano…
T40474	MET	Successful target	D04XUJ	CBT-101	Phase 1	Brain cancer;Liver cancer;Lung cancer;Non-small cell lung cancer;Ovarian cancer;Solid tumour/cancer;Thyroid cancer;Chronic arterial occlusive disease;Heart disease;Renal cell carcinoma;Stomach cancer;Breast cancer;Biliary tract cancer;Cardiovascular disease;Injury;Metastatic lymph node neoplasm;Sarcoma;Alzheimer disease;Colorectal cancer;Fibrosis;Glaucoma;Head and neck cancer;Liver disease;Melano…
T40474	MET	Successful target	D05BLN	MGCD516	Phase 2/3	Brain cancer;Liver cancer;Lung cancer;Non-small cell lung cancer;Ovarian cancer;Solid tumour/cancer;Thyroid cancer;Chronic arterial occlusive disease;Heart disease;Renal cell carcinoma;Stomach cancer;Breast cancer;Biliary tract cancer;Cardiovascular disease;Injury;Metastatic lymph node neoplasm;Sarcoma;Alzheimer disease;Colorectal cancer;Fibrosis;Glaucoma;Head and neck cancer;Liver disease;Melano…
T40474	MET	Successful target	D05GSI	LA-480	Investigative	Brain cancer;Liver cancer;Lung cancer;Non-small cell lung cancer;Ovarian cancer;Solid tumour/cancer;Thyroid cancer;Chronic arterial occlusive disease;Heart disease;Renal cell carcinoma;Stomach cancer;Breast cancer;Biliary tract cancer;Cardiovascular disease;Injury;Metastatic lymph node neoplasm;Sarcoma;Alzheimer disease;Colorectal cancer;Fibrosis;Glaucoma;Head and neck cancer;Liver disease;Melano…
T40474	MET	Successful target	D05OMT	MK-8033	Phase 1	Brain cancer;Liver cancer;Lung cancer;Non-small cell lung cancer;Ovarian cancer;Solid tumour/cancer;Thyroid cancer;Chronic arterial occlusive disease;Heart disease;Renal cell carcinoma;Stomach cancer;Breast cancer;Biliary tract cancer;Cardiovascular disease;Injury;Metastatic lymph node neoplasm;Sarcoma;Alzheimer disease;Colorectal cancer;Fibrosis;Glaucoma;Head and neck cancer;Liver disease;Melano…
T40474	MET	Successful target	D06EGV	LY2801653	Phase 2	Brain cancer;Liver cancer;Lung cancer;Non-small cell lung cancer;Ovarian cancer;Solid tumour/cancer;Thyroid cancer;Chronic arterial occlusive disease;Heart disease;Renal cell carcinoma;Stomach cancer;Breast cancer;Biliary tract cancer;Cardiovascular disease;Injury;Metastatic lymph node neoplasm;Sarcoma;Alzheimer disease;Colorectal cancer;Fibrosis;Glaucoma;Head and neck cancer;Liver disease;Melano…
T40474	MET	Successful target	D07ARN	SAR-125844	Phase 2	Brain cancer;Liver cancer;Lung cancer;Non-small cell lung cancer;Ovarian cancer;Solid tumour/cancer;Thyroid cancer;Chronic arterial occlusive disease;Heart disease;Renal cell carcinoma;Stomach cancer;Breast cancer;Biliary tract cancer;Cardiovascular disease;Injury;Metastatic lymph node neoplasm;Sarcoma;Alzheimer disease;Colorectal cancer;Fibrosis;Glaucoma;Head and neck cancer;Liver disease;Melano…
T40474	MET	Successful target	D07CFW	Anti-cMET mab	Investigative	Brain cancer;Liver cancer;Lung cancer;Non-small cell lung cancer;Ovarian cancer;Solid tumour/cancer;Thyroid cancer;Chronic arterial occlusive disease;Heart disease;Renal cell carcinoma;Stomach cancer;Breast cancer;Biliary tract cancer;Cardiovascular disease;Injury;Metastatic lymph node neoplasm;Sarcoma;Alzheimer disease;Colorectal cancer;Fibrosis;Glaucoma;Head and neck cancer;Liver disease;Melano…
T40474	MET	Successful target	D07OJZ	Capmatinib	Approved	Brain cancer;Liver cancer;Lung cancer;Non-small cell lung cancer;Ovarian cancer;Solid tumour/cancer;Thyroid cancer;Chronic arterial occlusive disease;Heart disease;Renal cell carcinoma;Stomach cancer;Breast cancer;Biliary tract cancer;Cardiovascular disease;Injury;Metastatic lymph node neoplasm;Sarcoma;Alzheimer disease;Colorectal cancer;Fibrosis;Glaucoma;Head and neck cancer;Liver disease;Melano…
T40474	MET	Successful target	D07OXC	AM7	Investigative	Brain cancer;Liver cancer;Lung cancer;Non-small cell lung cancer;Ovarian cancer;Solid tumour/cancer;Thyroid cancer;Chronic arterial occlusive disease;Heart disease;Renal cell carcinoma;Stomach cancer;Breast cancer;Biliary tract cancer;Cardiovascular disease;Injury;Metastatic lymph node neoplasm;Sarcoma;Alzheimer disease;Colorectal cancer;Fibrosis;Glaucoma;Head and neck cancer;Liver disease;Melano…
T40474	MET	Successful target	D09ETH	E-7050	Phase 1	Brain cancer;Liver cancer;Lung cancer;Non-small cell lung cancer;Ovarian cancer;Solid tumour/cancer;Thyroid cancer;Chronic arterial occlusive disease;Heart disease;Renal cell carcinoma;Stomach cancer;Breast cancer;Biliary tract cancer;Cardiovascular disease;Injury;Metastatic lymph node neoplasm;Sarcoma;Alzheimer disease;Colorectal cancer;Fibrosis;Glaucoma;Head and neck cancer;Liver disease;Melano…
T40474	MET	Successful target	D09ZNL	ChronSeal	Phase 1/2	Brain cancer;Liver cancer;Lung cancer;Non-small cell lung cancer;Ovarian cancer;Solid tumour/cancer;Thyroid cancer;Chronic arterial occlusive disease;Heart disease;Renal cell carcinoma;Stomach cancer;Breast cancer;Biliary tract cancer;Cardiovascular disease;Injury;Metastatic lymph node neoplasm;Sarcoma;Alzheimer disease;Colorectal cancer;Fibrosis;Glaucoma;Head and neck cancer;Liver disease;Melano…
T40474	MET	Successful target	D0A3OE	Anti-C-met CAR-T cells	Phase 1/2	Brain cancer;Liver cancer;Lung cancer;Non-small cell lung cancer;Ovarian cancer;Solid tumour/cancer;Thyroid cancer;Chronic arterial occlusive disease;Heart disease;Renal cell carcinoma;Stomach cancer;Breast cancer;Biliary tract cancer;Cardiovascular disease;Injury;Metastatic lymph node neoplasm;Sarcoma;Alzheimer disease;Colorectal cancer;Fibrosis;Glaucoma;Head and neck cancer;Liver disease;Melano…
T40474	MET	Successful target	D0AD6Z	mab 224G11	Investigative	Brain cancer;Liver cancer;Lung cancer;Non-small cell lung cancer;Ovarian cancer;Solid tumour/cancer;Thyroid cancer;Chronic arterial occlusive disease;Heart disease;Renal cell carcinoma;Stomach cancer;Breast cancer;Biliary tract cancer;Cardiovascular disease;Injury;Metastatic lymph node neoplasm;Sarcoma;Alzheimer disease;Colorectal cancer;Fibrosis;Glaucoma;Head and neck cancer;Liver disease;Melano…
T40474	MET	Successful target	D0B4OK	Sym015	Phase 1/2	Brain cancer;Liver cancer;Lung cancer;Non-small cell lung cancer;Ovarian cancer;Solid tumour/cancer;Thyroid cancer;Chronic arterial occlusive disease;Heart disease;Renal cell carcinoma;Stomach cancer;Breast cancer;Biliary tract cancer;Cardiovascular disease;Injury;Metastatic lymph node neoplasm;Sarcoma;Alzheimer disease;Colorectal cancer;Fibrosis;Glaucoma;Head and neck cancer;Liver disease;Melano…
T40474	MET	Successful target	D0BS6B	TP-801	Investigative	Brain cancer;Liver cancer;Lung cancer;Non-small cell lung cancer;Ovarian cancer;Solid tumour/cancer;Thyroid cancer;Chronic arterial occlusive disease;Heart disease;Renal cell carcinoma;Stomach cancer;Breast cancer;Biliary tract cancer;Cardiovascular disease;Injury;Metastatic lymph node neoplasm;Sarcoma;Alzheimer disease;Colorectal cancer;Fibrosis;Glaucoma;Head and neck cancer;Liver disease;Melano…
T40474	MET	Successful target	D0D1GF	XL880	Phase 2	Brain cancer;Liver cancer;Lung cancer;Non-small cell lung cancer;Ovarian cancer;Solid tumour/cancer;Thyroid cancer;Chronic arterial occlusive disease;Heart disease;Renal cell carcinoma;Stomach cancer;Breast cancer;Biliary tract cancer;Cardiovascular disease;Injury;Metastatic lymph node neoplasm;Sarcoma;Alzheimer disease;Colorectal cancer;Fibrosis;Glaucoma;Head and neck cancer;Liver disease;Melano…
T40474	MET	Successful target	D0D1HI	Autologous T Cells Expressing MET scFv CAR	Phase 1	Brain cancer;Liver cancer;Lung cancer;Non-small cell lung cancer;Ovarian cancer;Solid tumour/cancer;Thyroid cancer;Chronic arterial occlusive disease;Heart disease;Renal cell carcinoma;Stomach cancer;Breast cancer;Biliary tract cancer;Cardiovascular disease;Injury;Metastatic lymph node neoplasm;Sarcoma;Alzheimer disease;Colorectal cancer;Fibrosis;Glaucoma;Head and neck cancer;Liver disease;Melano…
T40474	MET	Successful target	D0E1QI	SU11274	Investigative	Brain cancer;Liver cancer;Lung cancer;Non-small cell lung cancer;Ovarian cancer;Solid tumour/cancer;Thyroid cancer;Chronic arterial occlusive disease;Heart disease;Renal cell carcinoma;Stomach cancer;Breast cancer;Biliary tract cancer;Cardiovascular disease;Injury;Metastatic lymph node neoplasm;Sarcoma;Alzheimer disease;Colorectal cancer;Fibrosis;Glaucoma;Head and neck cancer;Liver disease;Melano…
T40474	MET	Successful target	D0FA6S	Altiratinib	Phase 1	Brain cancer;Liver cancer;Lung cancer;Non-small cell lung cancer;Ovarian cancer;Solid tumour/cancer;Thyroid cancer;Chronic arterial occlusive disease;Heart disease;Renal cell carcinoma;Stomach cancer;Breast cancer;Biliary tract cancer;Cardiovascular disease;Injury;Metastatic lymph node neoplasm;Sarcoma;Alzheimer disease;Colorectal cancer;Fibrosis;Glaucoma;Head and neck cancer;Liver disease;Melano…
T40474	MET	Successful target	D0FE7D	Emibetuzumab	Phase 2	Brain cancer;Liver cancer;Lung cancer;Non-small cell lung cancer;Ovarian cancer;Solid tumour/cancer;Thyroid cancer;Chronic arterial occlusive disease;Heart disease;Renal cell carcinoma;Stomach cancer;Breast cancer;Biliary tract cancer;Cardiovascular disease;Injury;Metastatic lymph node neoplasm;Sarcoma;Alzheimer disease;Colorectal cancer;Fibrosis;Glaucoma;Head and neck cancer;Liver disease;Melano…
T40474	MET	Successful target	D0G0BL	AMG 337	Phase 2	Brain cancer;Liver cancer;Lung cancer;Non-small cell lung cancer;Ovarian cancer;Solid tumour/cancer;Thyroid cancer;Chronic arterial occlusive disease;Heart disease;Renal cell carcinoma;Stomach cancer;Breast cancer;Biliary tract cancer;Cardiovascular disease;Injury;Metastatic lymph node neoplasm;Sarcoma;Alzheimer disease;Colorectal cancer;Fibrosis;Glaucoma;Head and neck cancer;Liver disease;Melano…
T40474	MET	Successful target	D0G3ZN	PF-00614435	Investigative	Brain cancer;Liver cancer;Lung cancer;Non-small cell lung cancer;Ovarian cancer;Solid tumour/cancer;Thyroid cancer;Chronic arterial occlusive disease;Heart disease;Renal cell carcinoma;Stomach cancer;Breast cancer;Biliary tract cancer;Cardiovascular disease;Injury;Metastatic lymph node neoplasm;Sarcoma;Alzheimer disease;Colorectal cancer;Fibrosis;Glaucoma;Head and neck cancer;Liver disease;Melano…
T40474	MET	Successful target	D0H9PT	RG3638	Phase 3	Brain cancer;Liver cancer;Lung cancer;Non-small cell lung cancer;Ovarian cancer;Solid tumour/cancer;Thyroid cancer;Chronic arterial occlusive disease;Heart disease;Renal cell carcinoma;Stomach cancer;Breast cancer;Biliary tract cancer;Cardiovascular disease;Injury;Metastatic lymph node neoplasm;Sarcoma;Alzheimer disease;Colorectal cancer;Fibrosis;Glaucoma;Head and neck cancer;Liver disease;Melano…
T40474	MET	Successful target	D0I2IY	ABT-700	Phase 1	Brain cancer;Liver cancer;Lung cancer;Non-small cell lung cancer;Ovarian cancer;Solid tumour/cancer;Thyroid cancer;Chronic arterial occlusive disease;Heart disease;Renal cell carcinoma;Stomach cancer;Breast cancer;Biliary tract cancer;Cardiovascular disease;Injury;Metastatic lymph node neoplasm;Sarcoma;Alzheimer disease;Colorectal cancer;Fibrosis;Glaucoma;Head and neck cancer;Liver disease;Melano…
T40474	MET	Successful target	D0I2PS	CMET Avimer polypeptides	Investigative	Brain cancer;Liver cancer;Lung cancer;Non-small cell lung cancer;Ovarian cancer;Solid tumour/cancer;Thyroid cancer;Chronic arterial occlusive disease;Heart disease;Renal cell carcinoma;Stomach cancer;Breast cancer;Biliary tract cancer;Cardiovascular disease;Injury;Metastatic lymph node neoplasm;Sarcoma;Alzheimer disease;Colorectal cancer;Fibrosis;Glaucoma;Head and neck cancer;Liver disease;Melano…
T40474	MET	Successful target	D0IQ6P	Cabozantinib	Approved	Brain cancer;Liver cancer;Lung cancer;Non-small cell lung cancer;Ovarian cancer;Solid tumour/cancer;Thyroid cancer;Chronic arterial occlusive disease;Heart disease;Renal cell carcinoma;Stomach cancer;Breast cancer;Biliary tract cancer;Cardiovascular disease;Injury;Metastatic lymph node neoplasm;Sarcoma;Alzheimer disease;Colorectal cancer;Fibrosis;Glaucoma;Head and neck cancer;Liver disease;Melano…
T40474	MET	Successful target	D0LW0T	Savolitinib	Phase 3	Brain cancer;Liver cancer;Lung cancer;Non-small cell lung cancer;Ovarian cancer;Solid tumour/cancer;Thyroid cancer;Chronic arterial occlusive disease;Heart disease;Renal cell carcinoma;Stomach cancer;Breast cancer;Biliary tract cancer;Cardiovascular disease;Injury;Metastatic lymph node neoplasm;Sarcoma;Alzheimer disease;Colorectal cancer;Fibrosis;Glaucoma;Head and neck cancer;Liver disease;Melano…
T40474	MET	Successful target	D0M0SV	PRS-110	Investigative	Brain cancer;Liver cancer;Lung cancer;Non-small cell lung cancer;Ovarian cancer;Solid tumour/cancer;Thyroid cancer;Chronic arterial occlusive disease;Heart disease;Renal cell carcinoma;Stomach cancer;Breast cancer;Biliary tract cancer;Cardiovascular disease;Injury;Metastatic lymph node neoplasm;Sarcoma;Alzheimer disease;Colorectal cancer;Fibrosis;Glaucoma;Head and neck cancer;Liver disease;Melano…
T40474	MET	Successful target	D0M4SY	BMS-536924	Investigative	Brain cancer;Liver cancer;Lung cancer;Non-small cell lung cancer;Ovarian cancer;Solid tumour/cancer;Thyroid cancer;Chronic arterial occlusive disease;Heart disease;Renal cell carcinoma;Stomach cancer;Breast cancer;Biliary tract cancer;Cardiovascular disease;Injury;Metastatic lymph node neoplasm;Sarcoma;Alzheimer disease;Colorectal cancer;Fibrosis;Glaucoma;Head and neck cancer;Liver disease;Melano…
T40474	MET	Successful target	D0N1YF	Beperminogene perplasmid	Phase 3	Brain cancer;Liver cancer;Lung cancer;Non-small cell lung cancer;Ovarian cancer;Solid tumour/cancer;Thyroid cancer;Chronic arterial occlusive disease;Heart disease;Renal cell carcinoma;Stomach cancer;Breast cancer;Biliary tract cancer;Cardiovascular disease;Injury;Metastatic lymph node neoplasm;Sarcoma;Alzheimer disease;Colorectal cancer;Fibrosis;Glaucoma;Head and neck cancer;Liver disease;Melano…
T40474	MET	Successful target	D0N5XG	1-benzyl-1H-pyrrolo[3,2-b]pyridine	Investigative	Brain cancer;Liver cancer;Lung cancer;Non-small cell lung cancer;Ovarian cancer;Solid tumour/cancer;Thyroid cancer;Chronic arterial occlusive disease;Heart disease;Renal cell carcinoma;Stomach cancer;Breast cancer;Biliary tract cancer;Cardiovascular disease;Injury;Metastatic lymph node neoplasm;Sarcoma;Alzheimer disease;Colorectal cancer;Fibrosis;Glaucoma;Head and neck cancer;Liver disease;Melano…
T40474	MET	Successful target	D0N6QO	RP-1040	Investigative	Brain cancer;Liver cancer;Lung cancer;Non-small cell lung cancer;Ovarian cancer;Solid tumour/cancer;Thyroid cancer;Chronic arterial occlusive disease;Heart disease;Renal cell carcinoma;Stomach cancer;Breast cancer;Biliary tract cancer;Cardiovascular disease;Injury;Metastatic lymph node neoplasm;Sarcoma;Alzheimer disease;Colorectal cancer;Fibrosis;Glaucoma;Head and neck cancer;Liver disease;Melano…
T40474	MET	Successful target	D0N6VK	Hepapoietin	Phase 1	Brain cancer;Liver cancer;Lung cancer;Non-small cell lung cancer;Ovarian cancer;Solid tumour/cancer;Thyroid cancer;Chronic arterial occlusive disease;Heart disease;Renal cell carcinoma;Stomach cancer;Breast cancer;Biliary tract cancer;Cardiovascular disease;Injury;Metastatic lymph node neoplasm;Sarcoma;Alzheimer disease;Colorectal cancer;Fibrosis;Glaucoma;Head and neck cancer;Liver disease;Melano…
T40474	MET	Successful target	D0NO6E	Mteron-F1	Preclinical	Brain cancer;Liver cancer;Lung cancer;Non-small cell lung cancer;Ovarian cancer;Solid tumour/cancer;Thyroid cancer;Chronic arterial occlusive disease;Heart disease;Renal cell carcinoma;Stomach cancer;Breast cancer;Biliary tract cancer;Cardiovascular disease;Injury;Metastatic lymph node neoplasm;Sarcoma;Alzheimer disease;Colorectal cancer;Fibrosis;Glaucoma;Head and neck cancer;Liver disease;Melano…
T40474	MET	Successful target	D0NX6F	BAY-85-3474	Investigative	Brain cancer;Liver cancer;Lung cancer;Non-small cell lung cancer;Ovarian cancer;Solid tumour/cancer;Thyroid cancer;Chronic arterial occlusive disease;Heart disease;Renal cell carcinoma;Stomach cancer;Breast cancer;Biliary tract cancer;Cardiovascular disease;Injury;Metastatic lymph node neoplasm;Sarcoma;Alzheimer disease;Colorectal cancer;Fibrosis;Glaucoma;Head and neck cancer;Liver disease;Melano…
T40474	MET	Successful target	D0O6WV	BMS-777607	Phase 1/2	Brain cancer;Liver cancer;Lung cancer;Non-small cell lung cancer;Ovarian cancer;Solid tumour/cancer;Thyroid cancer;Chronic arterial occlusive disease;Heart disease;Renal cell carcinoma;Stomach cancer;Breast cancer;Biliary tract cancer;Cardiovascular disease;Injury;Metastatic lymph node neoplasm;Sarcoma;Alzheimer disease;Colorectal cancer;Fibrosis;Glaucoma;Head and neck cancer;Liver disease;Melano…
T40474	MET	Successful target	D0OK2N	AMG 208	Phase 2	Brain cancer;Liver cancer;Lung cancer;Non-small cell lung cancer;Ovarian cancer;Solid tumour/cancer;Thyroid cancer;Chronic arterial occlusive disease;Heart disease;Renal cell carcinoma;Stomach cancer;Breast cancer;Biliary tract cancer;Cardiovascular disease;Injury;Metastatic lymph node neoplasm;Sarcoma;Alzheimer disease;Colorectal cancer;Fibrosis;Glaucoma;Head and neck cancer;Liver disease;Melano…
T40474	MET	Successful target	D0PS7U	GE-137	Investigative	Brain cancer;Liver cancer;Lung cancer;Non-small cell lung cancer;Ovarian cancer;Solid tumour/cancer;Thyroid cancer;Chronic arterial occlusive disease;Heart disease;Renal cell carcinoma;Stomach cancer;Breast cancer;Biliary tract cancer;Cardiovascular disease;Injury;Metastatic lymph node neoplasm;Sarcoma;Alzheimer disease;Colorectal cancer;Fibrosis;Glaucoma;Head and neck cancer;Liver disease;Melano…
T40474	MET	Successful target	D0R0YW	HM-5016504	Phase 2	Brain cancer;Liver cancer;Lung cancer;Non-small cell lung cancer;Ovarian cancer;Solid tumour/cancer;Thyroid cancer;Chronic arterial occlusive disease;Heart disease;Renal cell carcinoma;Stomach cancer;Breast cancer;Biliary tract cancer;Cardiovascular disease;Injury;Metastatic lymph node neoplasm;Sarcoma;Alzheimer disease;Colorectal cancer;Fibrosis;Glaucoma;Head and neck cancer;Liver disease;Melano…
T40474	MET	Successful target	D0R8QG	Tepotinib	Approved	Brain cancer;Liver cancer;Lung cancer;Non-small cell lung cancer;Ovarian cancer;Solid tumour/cancer;Thyroid cancer;Chronic arterial occlusive disease;Heart disease;Renal cell carcinoma;Stomach cancer;Breast cancer;Biliary tract cancer;Cardiovascular disease;Injury;Metastatic lymph node neoplasm;Sarcoma;Alzheimer disease;Colorectal cancer;Fibrosis;Glaucoma;Head and neck cancer;Liver disease;Melano…
T40474	MET	Successful target	D0RO9R	PMID21123062C27	Investigative	Brain cancer;Liver cancer;Lung cancer;Non-small cell lung cancer;Ovarian cancer;Solid tumour/cancer;Thyroid cancer;Chronic arterial occlusive disease;Heart disease;Renal cell carcinoma;Stomach cancer;Breast cancer;Biliary tract cancer;Cardiovascular disease;Injury;Metastatic lymph node neoplasm;Sarcoma;Alzheimer disease;Colorectal cancer;Fibrosis;Glaucoma;Head and neck cancer;Liver disease;Melano…
T40474	MET	Successful target	D0S0GT	3-(phenylsulfonyl)-1H-pyrrolo[2,3-b]pyridine	Investigative	Brain cancer;Liver cancer;Lung cancer;Non-small cell lung cancer;Ovarian cancer;Solid tumour/cancer;Thyroid cancer;Chronic arterial occlusive disease;Heart disease;Renal cell carcinoma;Stomach cancer;Breast cancer;Biliary tract cancer;Cardiovascular disease;Injury;Metastatic lymph node neoplasm;Sarcoma;Alzheimer disease;Colorectal cancer;Fibrosis;Glaucoma;Head and neck cancer;Liver disease;Melano…
T40474	MET	Successful target	D0S1II	1-(2-nitrophenethyl)-1H-pyrrolo[3,2-b]pyridine	Investigative	Brain cancer;Liver cancer;Lung cancer;Non-small cell lung cancer;Ovarian cancer;Solid tumour/cancer;Thyroid cancer;Chronic arterial occlusive disease;Heart disease;Renal cell carcinoma;Stomach cancer;Breast cancer;Biliary tract cancer;Cardiovascular disease;Injury;Metastatic lymph node neoplasm;Sarcoma;Alzheimer disease;Colorectal cancer;Fibrosis;Glaucoma;Head and neck cancer;Liver disease;Melano…
T40474	MET	Successful target	D0T1YH	ALD-806	Investigative	Brain cancer;Liver cancer;Lung cancer;Non-small cell lung cancer;Ovarian cancer;Solid tumour/cancer;Thyroid cancer;Chronic arterial occlusive disease;Heart disease;Renal cell carcinoma;Stomach cancer;Breast cancer;Biliary tract cancer;Cardiovascular disease;Injury;Metastatic lymph node neoplasm;Sarcoma;Alzheimer disease;Colorectal cancer;Fibrosis;Glaucoma;Head and neck cancer;Liver disease;Melano…
T40474	MET	Successful target	D0U4JW	1-(phenylsulfonyl)-1H-pyrrolo[3,2-b]pyridine	Investigative	Brain cancer;Liver cancer;Lung cancer;Non-small cell lung cancer;Ovarian cancer;Solid tumour/cancer;Thyroid cancer;Chronic arterial occlusive disease;Heart disease;Renal cell carcinoma;Stomach cancer;Breast cancer;Biliary tract cancer;Cardiovascular disease;Injury;Metastatic lymph node neoplasm;Sarcoma;Alzheimer disease;Colorectal cancer;Fibrosis;Glaucoma;Head and neck cancer;Liver disease;Melano…
T40474	MET	Successful target	D0W8GP	DP-3590	Investigative	Brain cancer;Liver cancer;Lung cancer;Non-small cell lung cancer;Ovarian cancer;Solid tumour/cancer;Thyroid cancer;Chronic arterial occlusive disease;Heart disease;Renal cell carcinoma;Stomach cancer;Breast cancer;Biliary tract cancer;Cardiovascular disease;Injury;Metastatic lymph node neoplasm;Sarcoma;Alzheimer disease;Colorectal cancer;Fibrosis;Glaucoma;Head and neck cancer;Liver disease;Melano…
T40474	MET	Successful target	D0Y8UV	EMD-1204831	Phase 1	Brain cancer;Liver cancer;Lung cancer;Non-small cell lung cancer;Ovarian cancer;Solid tumour/cancer;Thyroid cancer;Chronic arterial occlusive disease;Heart disease;Renal cell carcinoma;Stomach cancer;Breast cancer;Biliary tract cancer;Cardiovascular disease;Injury;Metastatic lymph node neoplasm;Sarcoma;Alzheimer disease;Colorectal cancer;Fibrosis;Glaucoma;Head and neck cancer;Liver disease;Melano…
T40474	MET	Successful target	D0YT8P	JNJ-38877605	Phase 1	Brain cancer;Liver cancer;Lung cancer;Non-small cell lung cancer;Ovarian cancer;Solid tumour/cancer;Thyroid cancer;Chronic arterial occlusive disease;Heart disease;Renal cell carcinoma;Stomach cancer;Breast cancer;Biliary tract cancer;Cardiovascular disease;Injury;Metastatic lymph node neoplasm;Sarcoma;Alzheimer disease;Colorectal cancer;Fibrosis;Glaucoma;Head and neck cancer;Liver disease;Melano…
T40474	MET	Successful target	D0Z4RX	HuMax-cMet	Investigative	Brain cancer;Liver cancer;Lung cancer;Non-small cell lung cancer;Ovarian cancer;Solid tumour/cancer;Thyroid cancer;Chronic arterial occlusive disease;Heart disease;Renal cell carcinoma;Stomach cancer;Breast cancer;Biliary tract cancer;Cardiovascular disease;Injury;Metastatic lymph node neoplasm;Sarcoma;Alzheimer disease;Colorectal cancer;Fibrosis;Glaucoma;Head and neck cancer;Liver disease;Melano…
T40474	MET	Successful target	D0ZI1F	Tivantinib	Phase 3	Brain cancer;Liver cancer;Lung cancer;Non-small cell lung cancer;Ovarian cancer;Solid tumour/cancer;Thyroid cancer;Chronic arterial occlusive disease;Heart disease;Renal cell carcinoma;Stomach cancer;Breast cancer;Biliary tract cancer;Cardiovascular disease;Injury;Metastatic lymph node neoplasm;Sarcoma;Alzheimer disease;Colorectal cancer;Fibrosis;Glaucoma;Head and neck cancer;Liver disease;Melano…
T40474	MET	Successful target	D0ZU5F	SGX523	Phase 1	Brain cancer;Liver cancer;Lung cancer;Non-small cell lung cancer;Ovarian cancer;Solid tumour/cancer;Thyroid cancer;Chronic arterial occlusive disease;Heart disease;Renal cell carcinoma;Stomach cancer;Breast cancer;Biliary tract cancer;Cardiovascular disease;Injury;Metastatic lymph node neoplasm;Sarcoma;Alzheimer disease;Colorectal cancer;Fibrosis;Glaucoma;Head and neck cancer;Liver disease;Melano…
T40474	MET	Successful target	D1AD6L	NPS-1034	Preclinical	Brain cancer;Liver cancer;Lung cancer;Non-small cell lung cancer;Ovarian cancer;Solid tumour/cancer;Thyroid cancer;Chronic arterial occlusive disease;Heart disease;Renal cell carcinoma;Stomach cancer;Breast cancer;Biliary tract cancer;Cardiovascular disease;Injury;Metastatic lymph node neoplasm;Sarcoma;Alzheimer disease;Colorectal cancer;Fibrosis;Glaucoma;Head and neck cancer;Liver disease;Melano…
T40474	MET	Successful target	D1TNJ2	XL092	Phase 1	Brain cancer;Liver cancer;Lung cancer;Non-small cell lung cancer;Ovarian cancer;Solid tumour/cancer;Thyroid cancer;Chronic arterial occlusive disease;Heart disease;Renal cell carcinoma;Stomach cancer;Breast cancer;Biliary tract cancer;Cardiovascular disease;Injury;Metastatic lymph node neoplasm;Sarcoma;Alzheimer disease;Colorectal cancer;Fibrosis;Glaucoma;Head and neck cancer;Liver disease;Melano…
T40474	MET	Successful target	D42TUS	Telisotuzumab vedotin	Phase 2	Brain cancer;Liver cancer;Lung cancer;Non-small cell lung cancer;Ovarian cancer;Solid tumour/cancer;Thyroid cancer;Chronic arterial occlusive disease;Heart disease;Renal cell carcinoma;Stomach cancer;Breast cancer;Biliary tract cancer;Cardiovascular disease;Injury;Metastatic lymph node neoplasm;Sarcoma;Alzheimer disease;Colorectal cancer;Fibrosis;Glaucoma;Head and neck cancer;Liver disease;Melano…
T40474	MET	Successful target	D7HZ3T	RXDX-106	Phase 1	Brain cancer;Liver cancer;Lung cancer;Non-small cell lung cancer;Ovarian cancer;Solid tumour/cancer;Thyroid cancer;Chronic arterial occlusive disease;Heart disease;Renal cell carcinoma;Stomach cancer;Breast cancer;Biliary tract cancer;Cardiovascular disease;Injury;Metastatic lymph node neoplasm;Sarcoma;Alzheimer disease;Colorectal cancer;Fibrosis;Glaucoma;Head and neck cancer;Liver disease;Melano…
T40474	MET	Successful target	D7M8LI	TPX-0022	Phase 1	Brain cancer;Liver cancer;Lung cancer;Non-small cell lung cancer;Ovarian cancer;Solid tumour/cancer;Thyroid cancer;Chronic arterial occlusive disease;Heart disease;Renal cell carcinoma;Stomach cancer;Breast cancer;Biliary tract cancer;Cardiovascular disease;Injury;Metastatic lymph node neoplasm;Sarcoma;Alzheimer disease;Colorectal cancer;Fibrosis;Glaucoma;Head and neck cancer;Liver disease;Melano…
T40474	MET	Successful target	D95YSW	BPI-9016 M	Phase 1	Brain cancer;Liver cancer;Lung cancer;Non-small cell lung cancer;Ovarian cancer;Solid tumour/cancer;Thyroid cancer;Chronic arterial occlusive disease;Heart disease;Renal cell carcinoma;Stomach cancer;Breast cancer;Biliary tract cancer;Cardiovascular disease;Injury;Metastatic lymph node neoplasm;Sarcoma;Alzheimer disease;Colorectal cancer;Fibrosis;Glaucoma;Head and neck cancer;Liver disease;Melano…
T40474	MET	Successful target	DQ5X1Z	Amivantamab	Phase 3	Brain cancer;Liver cancer;Lung cancer;Non-small cell lung cancer;Ovarian cancer;Solid tumour/cancer;Thyroid cancer;Chronic arterial occlusive disease;Heart disease;Renal cell carcinoma;Stomach cancer;Breast cancer;Biliary tract cancer;Cardiovascular disease;Injury;Metastatic lymph node neoplasm;Sarcoma;Alzheimer disease;Colorectal cancer;Fibrosis;Glaucoma;Head and neck cancer;Liver disease;Melano…
T40474	MET	Successful target	DU6H8Z	TR1801-ADC	Phase 1	Brain cancer;Liver cancer;Lung cancer;Non-small cell lung cancer;Ovarian cancer;Solid tumour/cancer;Thyroid cancer;Chronic arterial occlusive disease;Heart disease;Renal cell carcinoma;Stomach cancer;Breast cancer;Biliary tract cancer;Cardiovascular disease;Injury;Metastatic lymph node neoplasm;Sarcoma;Alzheimer disease;Colorectal cancer;Fibrosis;Glaucoma;Head and neck cancer;Liver disease;Melano…
T40474	MET	Successful target	DV3Y7F	APL-101	Phase 2	Brain cancer;Liver cancer;Lung cancer;Non-small cell lung cancer;Ovarian cancer;Solid tumour/cancer;Thyroid cancer;Chronic arterial occlusive disease;Heart disease;Renal cell carcinoma;Stomach cancer;Breast cancer;Biliary tract cancer;Cardiovascular disease;Injury;Metastatic lymph node neoplasm;Sarcoma;Alzheimer disease;Colorectal cancer;Fibrosis;Glaucoma;Head and neck cancer;Liver disease;Melano…
T41515	FGFR4	Clinical trial target	D08EQD	FGF401	Phase 1/2	Obesity;Liver cancer;Solid tumour/cancer;Retina cancer
T41515	FGFR4	Clinical trial target	D09XIL	Ro-4396686	Investigative	Obesity;Liver cancer;Solid tumour/cancer;Retina cancer
T41515	FGFR4	Clinical trial target	D0D6XT	H3B-6527	Phase 1	Obesity;Liver cancer;Solid tumour/cancer;Retina cancer
T41515	FGFR4	Clinical trial target	D0SL8T	ISIS-FGFR4	Phase 2	Obesity;Liver cancer;Solid tumour/cancer;Retina cancer
T41515	FGFR4	Clinical trial target	D0XZ1D	BLU-554	Phase 1	Obesity;Liver cancer;Solid tumour/cancer;Retina cancer
T42974	GAS6	Clinical trial target	D8PE7D	AVB-500	Phase 2	Urinary system clinical sympton
T43115	PTPRC	Clinical trial target	D06MMU	LM-CD45	Phase 1	Acute myeloid leukaemia;Transplanted organ/tissue;Leukaemia;Diffuse large B-cell lymphoma;Lymphoma;Malignant haematopoietic neoplasm;Transplant rejection;Pain
T43115	PTPRC	Clinical trial target	D08BBL	Iomab-B	Phase 3	Acute myeloid leukaemia;Transplanted organ/tissue;Leukaemia;Diffuse large B-cell lymphoma;Lymphoma;Malignant haematopoietic neoplasm;Transplant rejection;Pain
T43115	PTPRC	Clinical trial target	D0G5OE	[131I]-BC8	Phase 2	Acute myeloid leukaemia;Transplanted organ/tissue;Leukaemia;Diffuse large B-cell lymphoma;Lymphoma;Malignant haematopoietic neoplasm;Transplant rejection;Pain
T43115	PTPRC	Clinical trial target	D0I0ZO	Anti-CD45 mabs	Phase 1	Acute myeloid leukaemia;Transplanted organ/tissue;Leukaemia;Diffuse large B-cell lymphoma;Lymphoma;Malignant haematopoietic neoplasm;Transplant rejection;Pain
T43115	PTPRC	Clinical trial target	D0N7VL	Asp-BrPmp-Leu	Investigative	Acute myeloid leukaemia;Transplanted organ/tissue;Leukaemia;Diffuse large B-cell lymphoma;Lymphoma;Malignant haematopoietic neoplasm;Transplant rejection;Pain
T43115	PTPRC	Clinical trial target	DC8EN0	131I-labelled aCD45	Phase 3	Acute myeloid leukaemia;Transplanted organ/tissue;Leukaemia;Diffuse large B-cell lymphoma;Lymphoma;Malignant haematopoietic neoplasm;Transplant rejection;Pain
T43115	PTPRC	Clinical trial target	DZ7OC3	Iomab-ACT	Phase 1	Acute myeloid leukaemia;Transplanted organ/tissue;Leukaemia;Diffuse large B-cell lymphoma;Lymphoma;Malignant haematopoietic neoplasm;Transplant rejection;Pain
T43206	RORA	Preclinical target	D01USH	7-hydroxycholesterol	Investigative	Liver cancer;Type 2 diabetes mellitus
T43206	RORA	Preclinical target	D0SK3V	US9598431, 3	Patented	Liver cancer;Type 2 diabetes mellitus
T43206	RORA	Preclinical target	D9D6QN	SR1078	Preclinical	Liver cancer;Type 2 diabetes mellitus
T43206	RORA	Preclinical target	DZ28EB	SR3335	Preclinical	Liver cancer;Type 2 diabetes mellitus
T44282	ALDH2	Clinical trial target	D00IXN	GS-6637	Phase 1	Cerebral ischaemia;Cardiovascular disease;Unspecific substance use disorder;Substance abuse
T44282	ALDH2	Clinical trial target	D08MTZ	ISOFORMONENTIN	Investigative	Cerebral ischaemia;Cardiovascular disease;Unspecific substance use disorder;Substance abuse
T44282	ALDH2	Clinical trial target	D09CSB	crotylaldehyde	Investigative	Cerebral ischaemia;Cardiovascular disease;Unspecific substance use disorder;Substance abuse
T44282	ALDH2	Clinical trial target	D09PSY	ANS-6637	Phase 1	Cerebral ischaemia;Cardiovascular disease;Unspecific substance use disorder;Substance abuse
T44282	ALDH2	Clinical trial target	D0A9RM	prunetin	Investigative	Cerebral ischaemia;Cardiovascular disease;Unspecific substance use disorder;Substance abuse
T44282	ALDH2	Clinical trial target	D0BI7J	FP-045	Phase 1	Cerebral ischaemia;Cardiovascular disease;Unspecific substance use disorder;Substance abuse
T44282	ALDH2	Clinical trial target	D0D8SN	ALD-401	Phase 2	Cerebral ischaemia;Cardiovascular disease;Unspecific substance use disorder;Substance abuse
T44282	ALDH2	Clinical trial target	D0R6JE	Nicotinamide-Adenine-Dinucleotide	Investigative	Cerebral ischaemia;Cardiovascular disease;Unspecific substance use disorder;Substance abuse
T44282	ALDH2	Clinical trial target	D0W4WP	CVT-10216	Investigative	Cerebral ischaemia;Cardiovascular disease;Unspecific substance use disorder;Substance abuse
T46628	MTTP	Successful target	D05YTG	SLx-4090	Phase 2	Hyper-lipoproteinaemia;Acute diabete complication;Dyslipidemia;Type 2 diabetes mellitus;Urinary system disease;Arterial occlusive disease
T46628	MTTP	Successful target	D0F2KX	Granotapide	Phase 2	Hyper-lipoproteinaemia;Acute diabete complication;Dyslipidemia;Type 2 diabetes mellitus;Urinary system disease;Arterial occlusive disease
T46628	MTTP	Successful target	D0F6YK	Implitapide	Phase 2	Hyper-lipoproteinaemia;Acute diabete complication;Dyslipidemia;Type 2 diabetes mellitus;Urinary system disease;Arterial occlusive disease
T46628	MTTP	Successful target	D0H8VY	BMS-201038	Approved	Hyper-lipoproteinaemia;Acute diabete complication;Dyslipidemia;Type 2 diabetes mellitus;Urinary system disease;Arterial occlusive disease
T46628	MTTP	Successful target	D0J0TP	DIRLOTAPIDE	Investigative	Hyper-lipoproteinaemia;Acute diabete complication;Dyslipidemia;Type 2 diabetes mellitus;Urinary system disease;Arterial occlusive disease
T46628	MTTP	Successful target	D0M5WS	JNJ-16269110	Phase 2	Hyper-lipoproteinaemia;Acute diabete complication;Dyslipidemia;Type 2 diabetes mellitus;Urinary system disease;Arterial occlusive disease
T46628	MTTP	Successful target	D0S7AW	KD020	Phase 1/2	Hyper-lipoproteinaemia;Acute diabete complication;Dyslipidemia;Type 2 diabetes mellitus;Urinary system disease;Arterial occlusive disease
T47101	FGFR1	Successful target	D00ABO	KW-2449	Phase 1	Bladder cancer;Colorectal cancer;Idiopathic interstitial pneumonitis;Liver cancer;Lung cancer;Multiple myeloma;Myelodysplastic syndrome;Myeloproliferative neoplasm;Ovarian cancer;Peritoneal cancer;Thrombocytopenia;Acute diabete complication;Solid tumour/cancer;Stomach cancer;Breast cancer;Coronary atherosclerosis;Endometrial cancer;Epidermal dysplasias;Oesophagitis;Alzheimer disease;Acute myeloid…
T47101	FGFR1	Successful target	D00DRL	MK-2461	Phase 1/2	Bladder cancer;Colorectal cancer;Idiopathic interstitial pneumonitis;Liver cancer;Lung cancer;Multiple myeloma;Myelodysplastic syndrome;Myeloproliferative neoplasm;Ovarian cancer;Peritoneal cancer;Thrombocytopenia;Acute diabete complication;Solid tumour/cancer;Stomach cancer;Breast cancer;Coronary atherosclerosis;Endometrial cancer;Epidermal dysplasias;Oesophagitis;Alzheimer disease;Acute myeloid…
T47101	FGFR1	Successful target	D00JZS	Anti-FGFR1 mab program	Investigative	Bladder cancer;Colorectal cancer;Idiopathic interstitial pneumonitis;Liver cancer;Lung cancer;Multiple myeloma;Myelodysplastic syndrome;Myeloproliferative neoplasm;Ovarian cancer;Peritoneal cancer;Thrombocytopenia;Acute diabete complication;Solid tumour/cancer;Stomach cancer;Breast cancer;Coronary atherosclerosis;Endometrial cancer;Epidermal dysplasias;Oesophagitis;Alzheimer disease;Acute myeloid…
T47101	FGFR1	Successful target	D01AVF	SAR-106881	Investigative	Bladder cancer;Colorectal cancer;Idiopathic interstitial pneumonitis;Liver cancer;Lung cancer;Multiple myeloma;Myelodysplastic syndrome;Myeloproliferative neoplasm;Ovarian cancer;Peritoneal cancer;Thrombocytopenia;Acute diabete complication;Solid tumour/cancer;Stomach cancer;Breast cancer;Coronary atherosclerosis;Endometrial cancer;Epidermal dysplasias;Oesophagitis;Alzheimer disease;Acute myeloid…
T47101	FGFR1	Successful target	D01PZD	Romiplostim	Approved	Bladder cancer;Colorectal cancer;Idiopathic interstitial pneumonitis;Liver cancer;Lung cancer;Multiple myeloma;Myelodysplastic syndrome;Myeloproliferative neoplasm;Ovarian cancer;Peritoneal cancer;Thrombocytopenia;Acute diabete complication;Solid tumour/cancer;Stomach cancer;Breast cancer;Coronary atherosclerosis;Endometrial cancer;Epidermal dysplasias;Oesophagitis;Alzheimer disease;Acute myeloid…
T47101	FGFR1	Successful target	D02WVT	E-3810	Phase 3	Bladder cancer;Colorectal cancer;Idiopathic interstitial pneumonitis;Liver cancer;Lung cancer;Multiple myeloma;Myelodysplastic syndrome;Myeloproliferative neoplasm;Ovarian cancer;Peritoneal cancer;Thrombocytopenia;Acute diabete complication;Solid tumour/cancer;Stomach cancer;Breast cancer;Coronary atherosclerosis;Endometrial cancer;Epidermal dysplasias;Oesophagitis;Alzheimer disease;Acute myeloid…
T47101	FGFR1	Successful target	D03LWG	BGJ398	Phase 3	Bladder cancer;Colorectal cancer;Idiopathic interstitial pneumonitis;Liver cancer;Lung cancer;Multiple myeloma;Myelodysplastic syndrome;Myeloproliferative neoplasm;Ovarian cancer;Peritoneal cancer;Thrombocytopenia;Acute diabete complication;Solid tumour/cancer;Stomach cancer;Breast cancer;Coronary atherosclerosis;Endometrial cancer;Epidermal dysplasias;Oesophagitis;Alzheimer disease;Acute myeloid…
T47101	FGFR1	Successful target	D03NPX	PD-0173955	Investigative	Bladder cancer;Colorectal cancer;Idiopathic interstitial pneumonitis;Liver cancer;Lung cancer;Multiple myeloma;Myelodysplastic syndrome;Myeloproliferative neoplasm;Ovarian cancer;Peritoneal cancer;Thrombocytopenia;Acute diabete complication;Solid tumour/cancer;Stomach cancer;Breast cancer;Coronary atherosclerosis;Endometrial cancer;Epidermal dysplasias;Oesophagitis;Alzheimer disease;Acute myeloid…
T47101	FGFR1	Successful target	D04FNY	NP-506	Investigative	Bladder cancer;Colorectal cancer;Idiopathic interstitial pneumonitis;Liver cancer;Lung cancer;Multiple myeloma;Myelodysplastic syndrome;Myeloproliferative neoplasm;Ovarian cancer;Peritoneal cancer;Thrombocytopenia;Acute diabete complication;Solid tumour/cancer;Stomach cancer;Breast cancer;Coronary atherosclerosis;Endometrial cancer;Epidermal dysplasias;Oesophagitis;Alzheimer disease;Acute myeloid…
T47101	FGFR1	Successful target	D05PWX	Sulfatinib	Phase 3	Bladder cancer;Colorectal cancer;Idiopathic interstitial pneumonitis;Liver cancer;Lung cancer;Multiple myeloma;Myelodysplastic syndrome;Myeloproliferative neoplasm;Ovarian cancer;Peritoneal cancer;Thrombocytopenia;Acute diabete complication;Solid tumour/cancer;Stomach cancer;Breast cancer;Coronary atherosclerosis;Endometrial cancer;Epidermal dysplasias;Oesophagitis;Alzheimer disease;Acute myeloid…
T47101	FGFR1	Successful target	D06FFZ	PMID26080733C7r	Investigative	Bladder cancer;Colorectal cancer;Idiopathic interstitial pneumonitis;Liver cancer;Lung cancer;Multiple myeloma;Myelodysplastic syndrome;Myeloproliferative neoplasm;Ovarian cancer;Peritoneal cancer;Thrombocytopenia;Acute diabete complication;Solid tumour/cancer;Stomach cancer;Breast cancer;Coronary atherosclerosis;Endometrial cancer;Epidermal dysplasias;Oesophagitis;Alzheimer disease;Acute myeloid…
T47101	FGFR1	Successful target	D06QUJ	3-(3-methoxybenzyl)-1H-pyrrolo[2,3-b]pyridine	Investigative	Bladder cancer;Colorectal cancer;Idiopathic interstitial pneumonitis;Liver cancer;Lung cancer;Multiple myeloma;Myelodysplastic syndrome;Myeloproliferative neoplasm;Ovarian cancer;Peritoneal cancer;Thrombocytopenia;Acute diabete complication;Solid tumour/cancer;Stomach cancer;Breast cancer;Coronary atherosclerosis;Endometrial cancer;Epidermal dysplasias;Oesophagitis;Alzheimer disease;Acute myeloid…
T47101	FGFR1	Successful target	D07PQJ	ARQ-087	Phase 3	Bladder cancer;Colorectal cancer;Idiopathic interstitial pneumonitis;Liver cancer;Lung cancer;Multiple myeloma;Myelodysplastic syndrome;Myeloproliferative neoplasm;Ovarian cancer;Peritoneal cancer;Thrombocytopenia;Acute diabete complication;Solid tumour/cancer;Stomach cancer;Breast cancer;Coronary atherosclerosis;Endometrial cancer;Epidermal dysplasias;Oesophagitis;Alzheimer disease;Acute myeloid…
T47101	FGFR1	Successful target	D07QMC	3-Benzimidazol-2-ylhydroquinolin-2-one	Investigative	Bladder cancer;Colorectal cancer;Idiopathic interstitial pneumonitis;Liver cancer;Lung cancer;Multiple myeloma;Myelodysplastic syndrome;Myeloproliferative neoplasm;Ovarian cancer;Peritoneal cancer;Thrombocytopenia;Acute diabete complication;Solid tumour/cancer;Stomach cancer;Breast cancer;Coronary atherosclerosis;Endometrial cancer;Epidermal dysplasias;Oesophagitis;Alzheimer disease;Acute myeloid…
T47101	FGFR1	Successful target	D08DFF	AM-001	Phase 2	Bladder cancer;Colorectal cancer;Idiopathic interstitial pneumonitis;Liver cancer;Lung cancer;Multiple myeloma;Myelodysplastic syndrome;Myeloproliferative neoplasm;Ovarian cancer;Peritoneal cancer;Thrombocytopenia;Acute diabete complication;Solid tumour/cancer;Stomach cancer;Breast cancer;Coronary atherosclerosis;Endometrial cancer;Epidermal dysplasias;Oesophagitis;Alzheimer disease;Acute myeloid…
T47101	FGFR1	Successful target	D08ZHL	FGF-1	Phase 2	Bladder cancer;Colorectal cancer;Idiopathic interstitial pneumonitis;Liver cancer;Lung cancer;Multiple myeloma;Myelodysplastic syndrome;Myeloproliferative neoplasm;Ovarian cancer;Peritoneal cancer;Thrombocytopenia;Acute diabete complication;Solid tumour/cancer;Stomach cancer;Breast cancer;Coronary atherosclerosis;Endometrial cancer;Epidermal dysplasias;Oesophagitis;Alzheimer disease;Acute myeloid…
T47101	FGFR1	Successful target	D09HNV	Intedanib	Approved	Bladder cancer;Colorectal cancer;Idiopathic interstitial pneumonitis;Liver cancer;Lung cancer;Multiple myeloma;Myelodysplastic syndrome;Myeloproliferative neoplasm;Ovarian cancer;Peritoneal cancer;Thrombocytopenia;Acute diabete complication;Solid tumour/cancer;Stomach cancer;Breast cancer;Coronary atherosclerosis;Endometrial cancer;Epidermal dysplasias;Oesophagitis;Alzheimer disease;Acute myeloid…
T47101	FGFR1	Successful target	D09XIL	Ro-4396686	Investigative	Bladder cancer;Colorectal cancer;Idiopathic interstitial pneumonitis;Liver cancer;Lung cancer;Multiple myeloma;Myelodysplastic syndrome;Myeloproliferative neoplasm;Ovarian cancer;Peritoneal cancer;Thrombocytopenia;Acute diabete complication;Solid tumour/cancer;Stomach cancer;Breast cancer;Coronary atherosclerosis;Endometrial cancer;Epidermal dysplasias;Oesophagitis;Alzheimer disease;Acute myeloid…
T47101	FGFR1	Successful target	D0A1AQ	Rosiglitazone + metformin	Phase 3	Bladder cancer;Colorectal cancer;Idiopathic interstitial pneumonitis;Liver cancer;Lung cancer;Multiple myeloma;Myelodysplastic syndrome;Myeloproliferative neoplasm;Ovarian cancer;Peritoneal cancer;Thrombocytopenia;Acute diabete complication;Solid tumour/cancer;Stomach cancer;Breast cancer;Coronary atherosclerosis;Endometrial cancer;Epidermal dysplasias;Oesophagitis;Alzheimer disease;Acute myeloid…
T47101	FGFR1	Successful target	D0C2GE	PMID22765894C8h	Investigative	Bladder cancer;Colorectal cancer;Idiopathic interstitial pneumonitis;Liver cancer;Lung cancer;Multiple myeloma;Myelodysplastic syndrome;Myeloproliferative neoplasm;Ovarian cancer;Peritoneal cancer;Thrombocytopenia;Acute diabete complication;Solid tumour/cancer;Stomach cancer;Breast cancer;Coronary atherosclerosis;Endometrial cancer;Epidermal dysplasias;Oesophagitis;Alzheimer disease;Acute myeloid…
T47101	FGFR1	Successful target	D0D5EW	HKI-9924129	Investigative	Bladder cancer;Colorectal cancer;Idiopathic interstitial pneumonitis;Liver cancer;Lung cancer;Multiple myeloma;Myelodysplastic syndrome;Myeloproliferative neoplasm;Ovarian cancer;Peritoneal cancer;Thrombocytopenia;Acute diabete complication;Solid tumour/cancer;Stomach cancer;Breast cancer;Coronary atherosclerosis;Endometrial cancer;Epidermal dysplasias;Oesophagitis;Alzheimer disease;Acute myeloid…
T47101	FGFR1	Successful target	D0DJ0S	NGM313	Phase 1	Bladder cancer;Colorectal cancer;Idiopathic interstitial pneumonitis;Liver cancer;Lung cancer;Multiple myeloma;Myelodysplastic syndrome;Myeloproliferative neoplasm;Ovarian cancer;Peritoneal cancer;Thrombocytopenia;Acute diabete complication;Solid tumour/cancer;Stomach cancer;Breast cancer;Coronary atherosclerosis;Endometrial cancer;Epidermal dysplasias;Oesophagitis;Alzheimer disease;Acute myeloid…
T47101	FGFR1	Successful target	D0E7VO	PMID24900538C2c	Investigative	Bladder cancer;Colorectal cancer;Idiopathic interstitial pneumonitis;Liver cancer;Lung cancer;Multiple myeloma;Myelodysplastic syndrome;Myeloproliferative neoplasm;Ovarian cancer;Peritoneal cancer;Thrombocytopenia;Acute diabete complication;Solid tumour/cancer;Stomach cancer;Breast cancer;Coronary atherosclerosis;Endometrial cancer;Epidermal dysplasias;Oesophagitis;Alzheimer disease;Acute myeloid…
T47101	FGFR1	Successful target	D0EE6A	AAL-993	Investigative	Bladder cancer;Colorectal cancer;Idiopathic interstitial pneumonitis;Liver cancer;Lung cancer;Multiple myeloma;Myelodysplastic syndrome;Myeloproliferative neoplasm;Ovarian cancer;Peritoneal cancer;Thrombocytopenia;Acute diabete complication;Solid tumour/cancer;Stomach cancer;Breast cancer;Coronary atherosclerosis;Endometrial cancer;Epidermal dysplasias;Oesophagitis;Alzheimer disease;Acute myeloid…
T47101	FGFR1	Successful target	D0GW4Q	PD-0173956	Investigative	Bladder cancer;Colorectal cancer;Idiopathic interstitial pneumonitis;Liver cancer;Lung cancer;Multiple myeloma;Myelodysplastic syndrome;Myeloproliferative neoplasm;Ovarian cancer;Peritoneal cancer;Thrombocytopenia;Acute diabete complication;Solid tumour/cancer;Stomach cancer;Breast cancer;Coronary atherosclerosis;Endometrial cancer;Epidermal dysplasias;Oesophagitis;Alzheimer disease;Acute myeloid…
T47101	FGFR1	Successful target	D0LF0O	BMS-695735	Preclinical	Bladder cancer;Colorectal cancer;Idiopathic interstitial pneumonitis;Liver cancer;Lung cancer;Multiple myeloma;Myelodysplastic syndrome;Myeloproliferative neoplasm;Ovarian cancer;Peritoneal cancer;Thrombocytopenia;Acute diabete complication;Solid tumour/cancer;Stomach cancer;Breast cancer;Coronary atherosclerosis;Endometrial cancer;Epidermal dysplasias;Oesophagitis;Alzheimer disease;Acute myeloid…
T47101	FGFR1	Successful target	D0NU0U	AZD4547	Phase 2/3	Bladder cancer;Colorectal cancer;Idiopathic interstitial pneumonitis;Liver cancer;Lung cancer;Multiple myeloma;Myelodysplastic syndrome;Myeloproliferative neoplasm;Ovarian cancer;Peritoneal cancer;Thrombocytopenia;Acute diabete complication;Solid tumour/cancer;Stomach cancer;Breast cancer;Coronary atherosclerosis;Endometrial cancer;Epidermal dysplasias;Oesophagitis;Alzheimer disease;Acute myeloid…
T47101	FGFR1	Successful target	D0O6UY	Pemigatinib	Approved	Bladder cancer;Colorectal cancer;Idiopathic interstitial pneumonitis;Liver cancer;Lung cancer;Multiple myeloma;Myelodysplastic syndrome;Myeloproliferative neoplasm;Ovarian cancer;Peritoneal cancer;Thrombocytopenia;Acute diabete complication;Solid tumour/cancer;Stomach cancer;Breast cancer;Coronary atherosclerosis;Endometrial cancer;Epidermal dysplasias;Oesophagitis;Alzheimer disease;Acute myeloid…
T47101	FGFR1	Successful target	D0OH3J	PD-0179483	Investigative	Bladder cancer;Colorectal cancer;Idiopathic interstitial pneumonitis;Liver cancer;Lung cancer;Multiple myeloma;Myelodysplastic syndrome;Myeloproliferative neoplasm;Ovarian cancer;Peritoneal cancer;Thrombocytopenia;Acute diabete complication;Solid tumour/cancer;Stomach cancer;Breast cancer;Coronary atherosclerosis;Endometrial cancer;Epidermal dysplasias;Oesophagitis;Alzheimer disease;Acute myeloid…
T47101	FGFR1	Successful target	D0P3JW	PD-0166326	Investigative	Bladder cancer;Colorectal cancer;Idiopathic interstitial pneumonitis;Liver cancer;Lung cancer;Multiple myeloma;Myelodysplastic syndrome;Myeloproliferative neoplasm;Ovarian cancer;Peritoneal cancer;Thrombocytopenia;Acute diabete complication;Solid tumour/cancer;Stomach cancer;Breast cancer;Coronary atherosclerosis;Endometrial cancer;Epidermal dysplasias;Oesophagitis;Alzheimer disease;Acute myeloid…
T47101	FGFR1	Successful target	D0R6OM	ACTB-1003	Investigative	Bladder cancer;Colorectal cancer;Idiopathic interstitial pneumonitis;Liver cancer;Lung cancer;Multiple myeloma;Myelodysplastic syndrome;Myeloproliferative neoplasm;Ovarian cancer;Peritoneal cancer;Thrombocytopenia;Acute diabete complication;Solid tumour/cancer;Stomach cancer;Breast cancer;Coronary atherosclerosis;Endometrial cancer;Epidermal dysplasias;Oesophagitis;Alzheimer disease;Acute myeloid…
T47101	FGFR1	Successful target	D0S1KJ	PD-0173952	Investigative	Bladder cancer;Colorectal cancer;Idiopathic interstitial pneumonitis;Liver cancer;Lung cancer;Multiple myeloma;Myelodysplastic syndrome;Myeloproliferative neoplasm;Ovarian cancer;Peritoneal cancer;Thrombocytopenia;Acute diabete complication;Solid tumour/cancer;Stomach cancer;Breast cancer;Coronary atherosclerosis;Endometrial cancer;Epidermal dysplasias;Oesophagitis;Alzheimer disease;Acute myeloid…
T47101	FGFR1	Successful target	D0U2DO	FP-1039	Phase 2	Bladder cancer;Colorectal cancer;Idiopathic interstitial pneumonitis;Liver cancer;Lung cancer;Multiple myeloma;Myelodysplastic syndrome;Myeloproliferative neoplasm;Ovarian cancer;Peritoneal cancer;Thrombocytopenia;Acute diabete complication;Solid tumour/cancer;Stomach cancer;Breast cancer;Coronary atherosclerosis;Endometrial cancer;Epidermal dysplasias;Oesophagitis;Alzheimer disease;Acute myeloid…
T47101	FGFR1	Successful target	D0XC6G	2-(1H-indazol-3-yl)-1H-benzo[d]imidazole	Investigative	Bladder cancer;Colorectal cancer;Idiopathic interstitial pneumonitis;Liver cancer;Lung cancer;Multiple myeloma;Myelodysplastic syndrome;Myeloproliferative neoplasm;Ovarian cancer;Peritoneal cancer;Thrombocytopenia;Acute diabete complication;Solid tumour/cancer;Stomach cancer;Breast cancer;Coronary atherosclerosis;Endometrial cancer;Epidermal dysplasias;Oesophagitis;Alzheimer disease;Acute myeloid…
T47101	FGFR1	Successful target	D0XT0W	Debio 1347	Phase 2	Bladder cancer;Colorectal cancer;Idiopathic interstitial pneumonitis;Liver cancer;Lung cancer;Multiple myeloma;Myelodysplastic syndrome;Myeloproliferative neoplasm;Ovarian cancer;Peritoneal cancer;Thrombocytopenia;Acute diabete complication;Solid tumour/cancer;Stomach cancer;Breast cancer;Coronary atherosclerosis;Endometrial cancer;Epidermal dysplasias;Oesophagitis;Alzheimer disease;Acute myeloid…
T47101	FGFR1	Successful target	D0Z7GH	PD-0173958	Investigative	Bladder cancer;Colorectal cancer;Idiopathic interstitial pneumonitis;Liver cancer;Lung cancer;Multiple myeloma;Myelodysplastic syndrome;Myeloproliferative neoplasm;Ovarian cancer;Peritoneal cancer;Thrombocytopenia;Acute diabete complication;Solid tumour/cancer;Stomach cancer;Breast cancer;Coronary atherosclerosis;Endometrial cancer;Epidermal dysplasias;Oesophagitis;Alzheimer disease;Acute myeloid…
T47387	BCL2	Clinical trial target	D00DDR	G3139 + Thalidomide	Investigative	Diffuse large B-cell lymphoma;Solid tumour/cancer;Leukaemia;Malignant haematopoietic neoplasm;Acute myeloid leukaemia;Colorectal cancer;Lung cancer;Lymphoma;Melanoma;Multiple myeloma
T47387	BCL2	Clinical trial target	D00GAM	Beclanorsen	Phase 1/2	Diffuse large B-cell lymphoma;Solid tumour/cancer;Leukaemia;Malignant haematopoietic neoplasm;Acute myeloid leukaemia;Colorectal cancer;Lung cancer;Lymphoma;Melanoma;Multiple myeloma
T47387	BCL2	Clinical trial target	D05IAN	G3139 + Irinotecan	Investigative	Diffuse large B-cell lymphoma;Solid tumour/cancer;Leukaemia;Malignant haematopoietic neoplasm;Acute myeloid leukaemia;Colorectal cancer;Lung cancer;Lymphoma;Melanoma;Multiple myeloma
T47387	BCL2	Clinical trial target	D07ACL	PNT-2258	Phase 2	Diffuse large B-cell lymphoma;Solid tumour/cancer;Leukaemia;Malignant haematopoietic neoplasm;Acute myeloid leukaemia;Colorectal cancer;Lung cancer;Lymphoma;Melanoma;Multiple myeloma
T47387	BCL2	Clinical trial target	D0B0HK	G3139 + G-CSF	Investigative	Diffuse large B-cell lymphoma;Solid tumour/cancer;Leukaemia;Malignant haematopoietic neoplasm;Acute myeloid leukaemia;Colorectal cancer;Lung cancer;Lymphoma;Melanoma;Multiple myeloma
T47387	BCL2	Clinical trial target	D0LM3T	G3139 + Fludarabine	Investigative	Diffuse large B-cell lymphoma;Solid tumour/cancer;Leukaemia;Malignant haematopoietic neoplasm;Acute myeloid leukaemia;Colorectal cancer;Lung cancer;Lymphoma;Melanoma;Multiple myeloma
T47387	BCL2	Clinical trial target	D0Q5NZ	BP-100-1.02	Investigative	Diffuse large B-cell lymphoma;Solid tumour/cancer;Leukaemia;Malignant haematopoietic neoplasm;Acute myeloid leukaemia;Colorectal cancer;Lung cancer;Lymphoma;Melanoma;Multiple myeloma
T47387	BCL2	Clinical trial target	D0S1FM	G3139 + Paclitaxel	Investigative	Diffuse large B-cell lymphoma;Solid tumour/cancer;Leukaemia;Malignant haematopoietic neoplasm;Acute myeloid leukaemia;Colorectal cancer;Lung cancer;Lymphoma;Melanoma;Multiple myeloma
T47387	BCL2	Clinical trial target	D0W8ZE	G3139 + Dexamethasone	Investigative	Diffuse large B-cell lymphoma;Solid tumour/cancer;Leukaemia;Malignant haematopoietic neoplasm;Acute myeloid leukaemia;Colorectal cancer;Lung cancer;Lymphoma;Melanoma;Multiple myeloma
T47387	BCL2	Clinical trial target	D0XU1I	G3139 + Dacarbazine	Investigative	Diffuse large B-cell lymphoma;Solid tumour/cancer;Leukaemia;Malignant haematopoietic neoplasm;Acute myeloid leukaemia;Colorectal cancer;Lung cancer;Lymphoma;Melanoma;Multiple myeloma
T47387	BCL2	Clinical trial target	D0XU9F	G3139 + cytarabine (ARA-C)	Investigative	Diffuse large B-cell lymphoma;Solid tumour/cancer;Leukaemia;Malignant haematopoietic neoplasm;Acute myeloid leukaemia;Colorectal cancer;Lung cancer;Lymphoma;Melanoma;Multiple myeloma
T47387	BCL2	Clinical trial target	DBPV74	BP1002	Phase 1	Diffuse large B-cell lymphoma;Solid tumour/cancer;Leukaemia;Malignant haematopoietic neoplasm;Acute myeloid leukaemia;Colorectal cancer;Lung cancer;Lymphoma;Melanoma;Multiple myeloma
T48069	IGF1R	Successful target	D00AKR	AMG 479	Phase 2	Multiple structural anomalies syndrome;Pituitary gland disorder;Retinopathy;Thyrotoxicosis;Solid tumour/cancer;Breast cancer;Chronic kidney disease;Extraocular muscle disorder;Liver cancer;Lung cancer;Pancreatic cancer;Colorectal cancer;Motor neuron disease;Multiple myeloma;Pain;Adrenal cancer
T48069	IGF1R	Successful target	D00BUO	MM-141	Phase 2	Multiple structural anomalies syndrome;Pituitary gland disorder;Retinopathy;Thyrotoxicosis;Solid tumour/cancer;Breast cancer;Chronic kidney disease;Extraocular muscle disorder;Liver cancer;Lung cancer;Pancreatic cancer;Colorectal cancer;Motor neuron disease;Multiple myeloma;Pain;Adrenal cancer
T48069	IGF1R	Successful target	D00ICA	AMP-PNP	Investigative	Multiple structural anomalies syndrome;Pituitary gland disorder;Retinopathy;Thyrotoxicosis;Solid tumour/cancer;Breast cancer;Chronic kidney disease;Extraocular muscle disorder;Liver cancer;Lung cancer;Pancreatic cancer;Colorectal cancer;Motor neuron disease;Multiple myeloma;Pain;Adrenal cancer
T48069	IGF1R	Successful target	D00VKK	VPI-2690B	Phase 2	Multiple structural anomalies syndrome;Pituitary gland disorder;Retinopathy;Thyrotoxicosis;Solid tumour/cancer;Breast cancer;Chronic kidney disease;Extraocular muscle disorder;Liver cancer;Lung cancer;Pancreatic cancer;Colorectal cancer;Motor neuron disease;Multiple myeloma;Pain;Adrenal cancer
T48069	IGF1R	Successful target	D01GFX	OSI-906	Phase 3	Multiple structural anomalies syndrome;Pituitary gland disorder;Retinopathy;Thyrotoxicosis;Solid tumour/cancer;Breast cancer;Chronic kidney disease;Extraocular muscle disorder;Liver cancer;Lung cancer;Pancreatic cancer;Colorectal cancer;Motor neuron disease;Multiple myeloma;Pain;Adrenal cancer
T48069	IGF1R	Successful target	D01OYS	Cyclolignan picropodophyllin	Phase 1	Multiple structural anomalies syndrome;Pituitary gland disorder;Retinopathy;Thyrotoxicosis;Solid tumour/cancer;Breast cancer;Chronic kidney disease;Extraocular muscle disorder;Liver cancer;Lung cancer;Pancreatic cancer;Colorectal cancer;Motor neuron disease;Multiple myeloma;Pain;Adrenal cancer
T48069	IGF1R	Successful target	D01SJS	AXL-1717	Phase 2	Multiple structural anomalies syndrome;Pituitary gland disorder;Retinopathy;Thyrotoxicosis;Solid tumour/cancer;Breast cancer;Chronic kidney disease;Extraocular muscle disorder;Liver cancer;Lung cancer;Pancreatic cancer;Colorectal cancer;Motor neuron disease;Multiple myeloma;Pain;Adrenal cancer
T48069	IGF1R	Successful target	D03BHM	R1507	Phase 2	Multiple structural anomalies syndrome;Pituitary gland disorder;Retinopathy;Thyrotoxicosis;Solid tumour/cancer;Breast cancer;Chronic kidney disease;Extraocular muscle disorder;Liver cancer;Lung cancer;Pancreatic cancer;Colorectal cancer;Motor neuron disease;Multiple myeloma;Pain;Adrenal cancer
T48069	IGF1R	Successful target	D03WNN	RG-7010	Phase 1	Multiple structural anomalies syndrome;Pituitary gland disorder;Retinopathy;Thyrotoxicosis;Solid tumour/cancer;Breast cancer;Chronic kidney disease;Extraocular muscle disorder;Liver cancer;Lung cancer;Pancreatic cancer;Colorectal cancer;Motor neuron disease;Multiple myeloma;Pain;Adrenal cancer
T48069	IGF1R	Successful target	D06APK	Rinfabate	Phase 2/3	Multiple structural anomalies syndrome;Pituitary gland disorder;Retinopathy;Thyrotoxicosis;Solid tumour/cancer;Breast cancer;Chronic kidney disease;Extraocular muscle disorder;Liver cancer;Lung cancer;Pancreatic cancer;Colorectal cancer;Motor neuron disease;Multiple myeloma;Pain;Adrenal cancer
T48069	IGF1R	Successful target	D06NMZ	NVP-ADW742	Investigative	Multiple structural anomalies syndrome;Pituitary gland disorder;Retinopathy;Thyrotoxicosis;Solid tumour/cancer;Breast cancer;Chronic kidney disease;Extraocular muscle disorder;Liver cancer;Lung cancer;Pancreatic cancer;Colorectal cancer;Motor neuron disease;Multiple myeloma;Pain;Adrenal cancer
T48069	IGF1R	Successful target	D07HPJ	AEW-541	Phase 1	Multiple structural anomalies syndrome;Pituitary gland disorder;Retinopathy;Thyrotoxicosis;Solid tumour/cancer;Breast cancer;Chronic kidney disease;Extraocular muscle disorder;Liver cancer;Lung cancer;Pancreatic cancer;Colorectal cancer;Motor neuron disease;Multiple myeloma;Pain;Adrenal cancer
T48069	IGF1R	Successful target	D07LUR	Alpha-D-Mannose	Investigative	Multiple structural anomalies syndrome;Pituitary gland disorder;Retinopathy;Thyrotoxicosis;Solid tumour/cancer;Breast cancer;Chronic kidney disease;Extraocular muscle disorder;Liver cancer;Lung cancer;Pancreatic cancer;Colorectal cancer;Motor neuron disease;Multiple myeloma;Pain;Adrenal cancer
T48069	IGF1R	Successful target	D0E5DP	Cixutumumab	Phase 2	Multiple structural anomalies syndrome;Pituitary gland disorder;Retinopathy;Thyrotoxicosis;Solid tumour/cancer;Breast cancer;Chronic kidney disease;Extraocular muscle disorder;Liver cancer;Lung cancer;Pancreatic cancer;Colorectal cancer;Motor neuron disease;Multiple myeloma;Pain;Adrenal cancer
T48069	IGF1R	Successful target	D0EN0W	Teprotumumab	Approved	Multiple structural anomalies syndrome;Pituitary gland disorder;Retinopathy;Thyrotoxicosis;Solid tumour/cancer;Breast cancer;Chronic kidney disease;Extraocular muscle disorder;Liver cancer;Lung cancer;Pancreatic cancer;Colorectal cancer;Motor neuron disease;Multiple myeloma;Pain;Adrenal cancer
T48069	IGF1R	Successful target	D0F3JT	Mecasermin	Approved	Multiple structural anomalies syndrome;Pituitary gland disorder;Retinopathy;Thyrotoxicosis;Solid tumour/cancer;Breast cancer;Chronic kidney disease;Extraocular muscle disorder;Liver cancer;Lung cancer;Pancreatic cancer;Colorectal cancer;Motor neuron disease;Multiple myeloma;Pain;Adrenal cancer
T48069	IGF1R	Successful target	D0G6XS	Fucose	Investigative	Multiple structural anomalies syndrome;Pituitary gland disorder;Retinopathy;Thyrotoxicosis;Solid tumour/cancer;Breast cancer;Chronic kidney disease;Extraocular muscle disorder;Liver cancer;Lung cancer;Pancreatic cancer;Colorectal cancer;Motor neuron disease;Multiple myeloma;Pain;Adrenal cancer
T48069	IGF1R	Successful target	D0L1ZM	HF-0299	Phase 1	Multiple structural anomalies syndrome;Pituitary gland disorder;Retinopathy;Thyrotoxicosis;Solid tumour/cancer;Breast cancer;Chronic kidney disease;Extraocular muscle disorder;Liver cancer;Lung cancer;Pancreatic cancer;Colorectal cancer;Motor neuron disease;Multiple myeloma;Pain;Adrenal cancer
T48069	IGF1R	Successful target	D0L7MM	4-((naphthalen-2-ylamino)methyl)benzene-1,2-diol	Investigative	Multiple structural anomalies syndrome;Pituitary gland disorder;Retinopathy;Thyrotoxicosis;Solid tumour/cancer;Breast cancer;Chronic kidney disease;Extraocular muscle disorder;Liver cancer;Lung cancer;Pancreatic cancer;Colorectal cancer;Motor neuron disease;Multiple myeloma;Pain;Adrenal cancer
T48069	IGF1R	Successful target	D0LF0O	BMS-695735	Preclinical	Multiple structural anomalies syndrome;Pituitary gland disorder;Retinopathy;Thyrotoxicosis;Solid tumour/cancer;Breast cancer;Chronic kidney disease;Extraocular muscle disorder;Liver cancer;Lung cancer;Pancreatic cancer;Colorectal cancer;Motor neuron disease;Multiple myeloma;Pain;Adrenal cancer
T48069	IGF1R	Successful target	D0M4SY	BMS-536924	Investigative	Multiple structural anomalies syndrome;Pituitary gland disorder;Retinopathy;Thyrotoxicosis;Solid tumour/cancer;Breast cancer;Chronic kidney disease;Extraocular muscle disorder;Liver cancer;Lung cancer;Pancreatic cancer;Colorectal cancer;Motor neuron disease;Multiple myeloma;Pain;Adrenal cancer
T48069	IGF1R	Successful target	D0N3NZ	Somatomedin-1	Approved	Multiple structural anomalies syndrome;Pituitary gland disorder;Retinopathy;Thyrotoxicosis;Solid tumour/cancer;Breast cancer;Chronic kidney disease;Extraocular muscle disorder;Liver cancer;Lung cancer;Pancreatic cancer;Colorectal cancer;Motor neuron disease;Multiple myeloma;Pain;Adrenal cancer
T48069	IGF1R	Successful target	D0O0RY	JB-1	Investigative	Multiple structural anomalies syndrome;Pituitary gland disorder;Retinopathy;Thyrotoxicosis;Solid tumour/cancer;Breast cancer;Chronic kidney disease;Extraocular muscle disorder;Liver cancer;Lung cancer;Pancreatic cancer;Colorectal cancer;Motor neuron disease;Multiple myeloma;Pain;Adrenal cancer
T48069	IGF1R	Successful target	D0O7QQ	BIIB 022	Phase 1	Multiple structural anomalies syndrome;Pituitary gland disorder;Retinopathy;Thyrotoxicosis;Solid tumour/cancer;Breast cancer;Chronic kidney disease;Extraocular muscle disorder;Liver cancer;Lung cancer;Pancreatic cancer;Colorectal cancer;Motor neuron disease;Multiple myeloma;Pain;Adrenal cancer
T48069	IGF1R	Successful target	D0T5JS	TT-100	Phase 2	Multiple structural anomalies syndrome;Pituitary gland disorder;Retinopathy;Thyrotoxicosis;Solid tumour/cancer;Breast cancer;Chronic kidney disease;Extraocular muscle disorder;Liver cancer;Lung cancer;Pancreatic cancer;Colorectal cancer;Motor neuron disease;Multiple myeloma;Pain;Adrenal cancer
T48069	IGF1R	Successful target	D0TI4U	EGFR/IGFR tandem adnectin	Preclinical	Multiple structural anomalies syndrome;Pituitary gland disorder;Retinopathy;Thyrotoxicosis;Solid tumour/cancer;Breast cancer;Chronic kidney disease;Extraocular muscle disorder;Liver cancer;Lung cancer;Pancreatic cancer;Colorectal cancer;Motor neuron disease;Multiple myeloma;Pain;Adrenal cancer
T48069	IGF1R	Successful target	D0W9KO	4-((1H-indazol-6-ylamino)methyl)benzene-1,2-diol	Investigative	Multiple structural anomalies syndrome;Pituitary gland disorder;Retinopathy;Thyrotoxicosis;Solid tumour/cancer;Breast cancer;Chronic kidney disease;Extraocular muscle disorder;Liver cancer;Lung cancer;Pancreatic cancer;Colorectal cancer;Motor neuron disease;Multiple myeloma;Pain;Adrenal cancer
T48069	IGF1R	Successful target	D4JYH3	FPI-1434	Phase 1	Multiple structural anomalies syndrome;Pituitary gland disorder;Retinopathy;Thyrotoxicosis;Solid tumour/cancer;Breast cancer;Chronic kidney disease;Extraocular muscle disorder;Liver cancer;Lung cancer;Pancreatic cancer;Colorectal cancer;Motor neuron disease;Multiple myeloma;Pain;Adrenal cancer
T48598	KRAS	Clinical trial target	D0DT5H	AZD4785	Phase 1	Solid tumour/cancer
T48598	KRAS	Clinical trial target	DR4K0V	BI 1701963	Phase 1	Solid tumour/cancer
T51407	XPO1	Clinical trial target	D00LNW	Selinexor	Phase 3	Acute myeloid leukaemia;Brain cancer;Diffuse large B-cell lymphoma;Liposarcoma;Multiple myeloma;Solid tumour/cancer;Stomach cancer;Colorectal cancer;Myelodysplastic syndrome;Prostate cancer
T51407	XPO1	Clinical trial target	D0JF6C	Eltanexor oral	Phase 1/2	Acute myeloid leukaemia;Brain cancer;Diffuse large B-cell lymphoma;Liposarcoma;Multiple myeloma;Solid tumour/cancer;Stomach cancer;Colorectal cancer;Myelodysplastic syndrome;Prostate cancer
T51407	XPO1	Clinical trial target	D0SP6A	SL-801	Phase 1	Acute myeloid leukaemia;Brain cancer;Diffuse large B-cell lymphoma;Liposarcoma;Multiple myeloma;Solid tumour/cancer;Stomach cancer;Colorectal cancer;Myelodysplastic syndrome;Prostate cancer
T51407	XPO1	Clinical trial target	D0VI7R	Selinexor oral	Phase 2	Acute myeloid leukaemia;Brain cancer;Diffuse large B-cell lymphoma;Liposarcoma;Multiple myeloma;Solid tumour/cancer;Stomach cancer;Colorectal cancer;Myelodysplastic syndrome;Prostate cancer
T51407	XPO1	Clinical trial target	D0Z8EJ	KOS-1815	Preclinical	Acute myeloid leukaemia;Brain cancer;Diffuse large B-cell lymphoma;Liposarcoma;Multiple myeloma;Solid tumour/cancer;Stomach cancer;Colorectal cancer;Myelodysplastic syndrome;Prostate cancer
T51407	XPO1	Clinical trial target	D2U4RX	S109	Investigative	Acute myeloid leukaemia;Brain cancer;Diffuse large B-cell lymphoma;Liposarcoma;Multiple myeloma;Solid tumour/cancer;Stomach cancer;Colorectal cancer;Myelodysplastic syndrome;Prostate cancer
T51407	XPO1	Clinical trial target	D3GD1L	Octahydrocurcumin	Investigative	Acute myeloid leukaemia;Brain cancer;Diffuse large B-cell lymphoma;Liposarcoma;Multiple myeloma;Solid tumour/cancer;Stomach cancer;Colorectal cancer;Myelodysplastic syndrome;Prostate cancer
T51426	NR1H4	Successful target	D00HTO	Apomine	Phase 2	Autoimmune liver disease;Cholelithiasis;Insomnia;Osteoarthritis;Breast cancer;Non-alcoholic fatty liver disease;Chronic kidney disease;Skeletal anomaly;Hepatic fibrosis/cirrhosis;Hyper-lipoproteinaemia;Type 2 diabetes mellitus
T51426	NR1H4	Successful target	D01GUG	12-O-deacetyl-12-epi-19-deoxy-21-hydroxyscalarin	Investigative	Autoimmune liver disease;Cholelithiasis;Insomnia;Osteoarthritis;Breast cancer;Non-alcoholic fatty liver disease;Chronic kidney disease;Skeletal anomaly;Hepatic fibrosis/cirrhosis;Hyper-lipoproteinaemia;Type 2 diabetes mellitus
T51426	NR1H4	Successful target	D01MYO	Fexaramine	Investigative	Autoimmune liver disease;Cholelithiasis;Insomnia;Osteoarthritis;Breast cancer;Non-alcoholic fatty liver disease;Chronic kidney disease;Skeletal anomaly;Hepatic fibrosis/cirrhosis;Hyper-lipoproteinaemia;Type 2 diabetes mellitus
T51426	NR1H4	Successful target	D01QNX	PMID29649907-Compound-15	Patented	Autoimmune liver disease;Cholelithiasis;Insomnia;Osteoarthritis;Breast cancer;Non-alcoholic fatty liver disease;Chronic kidney disease;Skeletal anomaly;Hepatic fibrosis/cirrhosis;Hyper-lipoproteinaemia;Type 2 diabetes mellitus
T51426	NR1H4	Successful target	D01RNA	desmosterol	Investigative	Autoimmune liver disease;Cholelithiasis;Insomnia;Osteoarthritis;Breast cancer;Non-alcoholic fatty liver disease;Chronic kidney disease;Skeletal anomaly;Hepatic fibrosis/cirrhosis;Hyper-lipoproteinaemia;Type 2 diabetes mellitus
T51426	NR1H4	Successful target	D01SYU	Turofexorate isopropyl	Phase 1	Autoimmune liver disease;Cholelithiasis;Insomnia;Osteoarthritis;Breast cancer;Non-alcoholic fatty liver disease;Chronic kidney disease;Skeletal anomaly;Hepatic fibrosis/cirrhosis;Hyper-lipoproteinaemia;Type 2 diabetes mellitus
T51426	NR1H4	Successful target	D01XIW	PMID29649907-Compound-22	Patented	Autoimmune liver disease;Cholelithiasis;Insomnia;Osteoarthritis;Breast cancer;Non-alcoholic fatty liver disease;Chronic kidney disease;Skeletal anomaly;Hepatic fibrosis/cirrhosis;Hyper-lipoproteinaemia;Type 2 diabetes mellitus
T51426	NR1H4	Successful target	D02OJH	PMID29649907-Compound-26	Patented	Autoimmune liver disease;Cholelithiasis;Insomnia;Osteoarthritis;Breast cancer;Non-alcoholic fatty liver disease;Chronic kidney disease;Skeletal anomaly;Hepatic fibrosis/cirrhosis;Hyper-lipoproteinaemia;Type 2 diabetes mellitus
T51426	NR1H4	Successful target	D02RCY	PMID29649907-Compound-41	Patented	Autoimmune liver disease;Cholelithiasis;Insomnia;Osteoarthritis;Breast cancer;Non-alcoholic fatty liver disease;Chronic kidney disease;Skeletal anomaly;Hepatic fibrosis/cirrhosis;Hyper-lipoproteinaemia;Type 2 diabetes mellitus
T51426	NR1H4	Successful target	D03DZQ	PMID30259754-Compound-WAY-362450	Patented	Autoimmune liver disease;Cholelithiasis;Insomnia;Osteoarthritis;Breast cancer;Non-alcoholic fatty liver disease;Chronic kidney disease;Skeletal anomaly;Hepatic fibrosis/cirrhosis;Hyper-lipoproteinaemia;Type 2 diabetes mellitus
T51426	NR1H4	Successful target	D03IMJ	PMID29649907-Compound-20	Patented	Autoimmune liver disease;Cholelithiasis;Insomnia;Osteoarthritis;Breast cancer;Non-alcoholic fatty liver disease;Chronic kidney disease;Skeletal anomaly;Hepatic fibrosis/cirrhosis;Hyper-lipoproteinaemia;Type 2 diabetes mellitus
T51426	NR1H4	Successful target	D03ZTE	Chenodiol	Approved	Autoimmune liver disease;Cholelithiasis;Insomnia;Osteoarthritis;Breast cancer;Non-alcoholic fatty liver disease;Chronic kidney disease;Skeletal anomaly;Hepatic fibrosis/cirrhosis;Hyper-lipoproteinaemia;Type 2 diabetes mellitus
T51426	NR1H4	Successful target	D04QBY	PMID29649907-Compound-27	Patented	Autoimmune liver disease;Cholelithiasis;Insomnia;Osteoarthritis;Breast cancer;Non-alcoholic fatty liver disease;Chronic kidney disease;Skeletal anomaly;Hepatic fibrosis/cirrhosis;Hyper-lipoproteinaemia;Type 2 diabetes mellitus
T51426	NR1H4	Successful target	D04SLF	Bevacizumab + Trastuzumab	Phase 3	Autoimmune liver disease;Cholelithiasis;Insomnia;Osteoarthritis;Breast cancer;Non-alcoholic fatty liver disease;Chronic kidney disease;Skeletal anomaly;Hepatic fibrosis/cirrhosis;Hyper-lipoproteinaemia;Type 2 diabetes mellitus
T51426	NR1H4	Successful target	D05EUR	LJN452	Phase 2	Autoimmune liver disease;Cholelithiasis;Insomnia;Osteoarthritis;Breast cancer;Non-alcoholic fatty liver disease;Chronic kidney disease;Skeletal anomaly;Hepatic fibrosis/cirrhosis;Hyper-lipoproteinaemia;Type 2 diabetes mellitus
T51426	NR1H4	Successful target	D05QJY	PMID29649907-Compound-9	Patented	Autoimmune liver disease;Cholelithiasis;Insomnia;Osteoarthritis;Breast cancer;Non-alcoholic fatty liver disease;Chronic kidney disease;Skeletal anomaly;Hepatic fibrosis/cirrhosis;Hyper-lipoproteinaemia;Type 2 diabetes mellitus
T51426	NR1H4	Successful target	D07EDS	PMID29649907-Compound-29	Patented	Autoimmune liver disease;Cholelithiasis;Insomnia;Osteoarthritis;Breast cancer;Non-alcoholic fatty liver disease;Chronic kidney disease;Skeletal anomaly;Hepatic fibrosis/cirrhosis;Hyper-lipoproteinaemia;Type 2 diabetes mellitus
T51426	NR1H4	Successful target	D07NTP	PMID29649907-Compound-14	Patented	Autoimmune liver disease;Cholelithiasis;Insomnia;Osteoarthritis;Breast cancer;Non-alcoholic fatty liver disease;Chronic kidney disease;Skeletal anomaly;Hepatic fibrosis/cirrhosis;Hyper-lipoproteinaemia;Type 2 diabetes mellitus
T51426	NR1H4	Successful target	D08LIB	PMID29649907-Compound-INT767	Patented	Autoimmune liver disease;Cholelithiasis;Insomnia;Osteoarthritis;Breast cancer;Non-alcoholic fatty liver disease;Chronic kidney disease;Skeletal anomaly;Hepatic fibrosis/cirrhosis;Hyper-lipoproteinaemia;Type 2 diabetes mellitus
T51426	NR1H4	Successful target	D08MBD	PMID29649907-Compound-24	Patented	Autoimmune liver disease;Cholelithiasis;Insomnia;Osteoarthritis;Breast cancer;Non-alcoholic fatty liver disease;Chronic kidney disease;Skeletal anomaly;Hepatic fibrosis/cirrhosis;Hyper-lipoproteinaemia;Type 2 diabetes mellitus
T51426	NR1H4	Successful target	D08MYA	PMID29649907-Compound-31	Patented	Autoimmune liver disease;Cholelithiasis;Insomnia;Osteoarthritis;Breast cancer;Non-alcoholic fatty liver disease;Chronic kidney disease;Skeletal anomaly;Hepatic fibrosis/cirrhosis;Hyper-lipoproteinaemia;Type 2 diabetes mellitus
T51426	NR1H4	Successful target	D08ZAW	PMID29649907-Compound-12	Patented	Autoimmune liver disease;Cholelithiasis;Insomnia;Osteoarthritis;Breast cancer;Non-alcoholic fatty liver disease;Chronic kidney disease;Skeletal anomaly;Hepatic fibrosis/cirrhosis;Hyper-lipoproteinaemia;Type 2 diabetes mellitus
T51426	NR1H4	Successful target	D09FOM	PMID30259754-Compound-pyrrole[2,3-d]azepines	Patented	Autoimmune liver disease;Cholelithiasis;Insomnia;Osteoarthritis;Breast cancer;Non-alcoholic fatty liver disease;Chronic kidney disease;Skeletal anomaly;Hepatic fibrosis/cirrhosis;Hyper-lipoproteinaemia;Type 2 diabetes mellitus
T51426	NR1H4	Successful target	D0A4LL	PMID29649907-Compound-25	Patented	Autoimmune liver disease;Cholelithiasis;Insomnia;Osteoarthritis;Breast cancer;Non-alcoholic fatty liver disease;Chronic kidney disease;Skeletal anomaly;Hepatic fibrosis/cirrhosis;Hyper-lipoproteinaemia;Type 2 diabetes mellitus
T51426	NR1H4	Successful target	D0AA3P	PMID29649907-Compound-8	Patented	Autoimmune liver disease;Cholelithiasis;Insomnia;Osteoarthritis;Breast cancer;Non-alcoholic fatty liver disease;Chronic kidney disease;Skeletal anomaly;Hepatic fibrosis/cirrhosis;Hyper-lipoproteinaemia;Type 2 diabetes mellitus
T51426	NR1H4	Successful target	D0BN9E	PMID29649907-Compound-13	Patented	Autoimmune liver disease;Cholelithiasis;Insomnia;Osteoarthritis;Breast cancer;Non-alcoholic fatty liver disease;Chronic kidney disease;Skeletal anomaly;Hepatic fibrosis/cirrhosis;Hyper-lipoproteinaemia;Type 2 diabetes mellitus
T51426	NR1H4	Successful target	D0E0MH	PMID30259754-Compound-INT-767	Patented	Autoimmune liver disease;Cholelithiasis;Insomnia;Osteoarthritis;Breast cancer;Non-alcoholic fatty liver disease;Chronic kidney disease;Skeletal anomaly;Hepatic fibrosis/cirrhosis;Hyper-lipoproteinaemia;Type 2 diabetes mellitus
T51426	NR1H4	Successful target	D0E5ED	PMID29649907-Compound-5	Patented	Autoimmune liver disease;Cholelithiasis;Insomnia;Osteoarthritis;Breast cancer;Non-alcoholic fatty liver disease;Chronic kidney disease;Skeletal anomaly;Hepatic fibrosis/cirrhosis;Hyper-lipoproteinaemia;Type 2 diabetes mellitus
T51426	NR1H4	Successful target	D0EB7G	PMID29649907-Compound-3	Patented	Autoimmune liver disease;Cholelithiasis;Insomnia;Osteoarthritis;Breast cancer;Non-alcoholic fatty liver disease;Chronic kidney disease;Skeletal anomaly;Hepatic fibrosis/cirrhosis;Hyper-lipoproteinaemia;Type 2 diabetes mellitus
T51426	NR1H4	Successful target	D0F2OO	PMID29649907-Compound-18	Patented	Autoimmune liver disease;Cholelithiasis;Insomnia;Osteoarthritis;Breast cancer;Non-alcoholic fatty liver disease;Chronic kidney disease;Skeletal anomaly;Hepatic fibrosis/cirrhosis;Hyper-lipoproteinaemia;Type 2 diabetes mellitus
T51426	NR1H4	Successful target	D0F3SQ	PMID29649907-Compound-2	Patented	Autoimmune liver disease;Cholelithiasis;Insomnia;Osteoarthritis;Breast cancer;Non-alcoholic fatty liver disease;Chronic kidney disease;Skeletal anomaly;Hepatic fibrosis/cirrhosis;Hyper-lipoproteinaemia;Type 2 diabetes mellitus
T51426	NR1H4	Successful target	D0F5MF	PMID29649907-Compound-33	Patented	Autoimmune liver disease;Cholelithiasis;Insomnia;Osteoarthritis;Breast cancer;Non-alcoholic fatty liver disease;Chronic kidney disease;Skeletal anomaly;Hepatic fibrosis/cirrhosis;Hyper-lipoproteinaemia;Type 2 diabetes mellitus
T51426	NR1H4	Successful target	D0FC0B	PMID29649907-Compound-21	Patented	Autoimmune liver disease;Cholelithiasis;Insomnia;Osteoarthritis;Breast cancer;Non-alcoholic fatty liver disease;Chronic kidney disease;Skeletal anomaly;Hepatic fibrosis/cirrhosis;Hyper-lipoproteinaemia;Type 2 diabetes mellitus
T51426	NR1H4	Successful target	D0G8BV	Guggulsterone	Approved	Autoimmune liver disease;Cholelithiasis;Insomnia;Osteoarthritis;Breast cancer;Non-alcoholic fatty liver disease;Chronic kidney disease;Skeletal anomaly;Hepatic fibrosis/cirrhosis;Hyper-lipoproteinaemia;Type 2 diabetes mellitus
T51426	NR1H4	Successful target	D0GR9O	AGN-34	Investigative	Autoimmune liver disease;Cholelithiasis;Insomnia;Osteoarthritis;Breast cancer;Non-alcoholic fatty liver disease;Chronic kidney disease;Skeletal anomaly;Hepatic fibrosis/cirrhosis;Hyper-lipoproteinaemia;Type 2 diabetes mellitus
T51426	NR1H4	Successful target	D0HH9N	cholesten	Investigative	Autoimmune liver disease;Cholelithiasis;Insomnia;Osteoarthritis;Breast cancer;Non-alcoholic fatty liver disease;Chronic kidney disease;Skeletal anomaly;Hepatic fibrosis/cirrhosis;Hyper-lipoproteinaemia;Type 2 diabetes mellitus
T51426	NR1H4	Successful target	D0HR8Y	PMID29649907-Compound-10	Patented	Autoimmune liver disease;Cholelithiasis;Insomnia;Osteoarthritis;Breast cancer;Non-alcoholic fatty liver disease;Chronic kidney disease;Skeletal anomaly;Hepatic fibrosis/cirrhosis;Hyper-lipoproteinaemia;Type 2 diabetes mellitus
T51426	NR1H4	Successful target	D0IO8G	GW4065	Investigative	Autoimmune liver disease;Cholelithiasis;Insomnia;Osteoarthritis;Breast cancer;Non-alcoholic fatty liver disease;Chronic kidney disease;Skeletal anomaly;Hepatic fibrosis/cirrhosis;Hyper-lipoproteinaemia;Type 2 diabetes mellitus
T51426	NR1H4	Successful target	D0J4CL	PMID29649907-Compound-19	Patented	Autoimmune liver disease;Cholelithiasis;Insomnia;Osteoarthritis;Breast cancer;Non-alcoholic fatty liver disease;Chronic kidney disease;Skeletal anomaly;Hepatic fibrosis/cirrhosis;Hyper-lipoproteinaemia;Type 2 diabetes mellitus
T51426	NR1H4	Successful target	D0JD0G	PMID29649907-Compound-4	Patented	Autoimmune liver disease;Cholelithiasis;Insomnia;Osteoarthritis;Breast cancer;Non-alcoholic fatty liver disease;Chronic kidney disease;Skeletal anomaly;Hepatic fibrosis/cirrhosis;Hyper-lipoproteinaemia;Type 2 diabetes mellitus
T51426	NR1H4	Successful target	D0K3UO	PMID29649907-Compound-39	Patented	Autoimmune liver disease;Cholelithiasis;Insomnia;Osteoarthritis;Breast cancer;Non-alcoholic fatty liver disease;Chronic kidney disease;Skeletal anomaly;Hepatic fibrosis/cirrhosis;Hyper-lipoproteinaemia;Type 2 diabetes mellitus
T51426	NR1H4	Successful target	D0K4GK	22R-hydroxycholesterol	Investigative	Autoimmune liver disease;Cholelithiasis;Insomnia;Osteoarthritis;Breast cancer;Non-alcoholic fatty liver disease;Chronic kidney disease;Skeletal anomaly;Hepatic fibrosis/cirrhosis;Hyper-lipoproteinaemia;Type 2 diabetes mellitus
T51426	NR1H4	Successful target	D0KB4T	PMID29649907-Compound-44	Patented	Autoimmune liver disease;Cholelithiasis;Insomnia;Osteoarthritis;Breast cancer;Non-alcoholic fatty liver disease;Chronic kidney disease;Skeletal anomaly;Hepatic fibrosis/cirrhosis;Hyper-lipoproteinaemia;Type 2 diabetes mellitus
T51426	NR1H4	Successful target	D0M4WA	obeticholic acid	Approved	Autoimmune liver disease;Cholelithiasis;Insomnia;Osteoarthritis;Breast cancer;Non-alcoholic fatty liver disease;Chronic kidney disease;Skeletal anomaly;Hepatic fibrosis/cirrhosis;Hyper-lipoproteinaemia;Type 2 diabetes mellitus
T51426	NR1H4	Successful target	D0N4PL	PMID29649907-Compound-36	Patented	Autoimmune liver disease;Cholelithiasis;Insomnia;Osteoarthritis;Breast cancer;Non-alcoholic fatty liver disease;Chronic kidney disease;Skeletal anomaly;Hepatic fibrosis/cirrhosis;Hyper-lipoproteinaemia;Type 2 diabetes mellitus
T51426	NR1H4	Successful target	D0OM2M	PMID29649907-Compound-28	Patented	Autoimmune liver disease;Cholelithiasis;Insomnia;Osteoarthritis;Breast cancer;Non-alcoholic fatty liver disease;Chronic kidney disease;Skeletal anomaly;Hepatic fibrosis/cirrhosis;Hyper-lipoproteinaemia;Type 2 diabetes mellitus
T51426	NR1H4	Successful target	D0R8GK	PMID30259754-Compound-Px-102	Patented	Autoimmune liver disease;Cholelithiasis;Insomnia;Osteoarthritis;Breast cancer;Non-alcoholic fatty liver disease;Chronic kidney disease;Skeletal anomaly;Hepatic fibrosis/cirrhosis;Hyper-lipoproteinaemia;Type 2 diabetes mellitus
T51426	NR1H4	Successful target	D0RL3M	PMID29649907-Compound-35	Patented	Autoimmune liver disease;Cholelithiasis;Insomnia;Osteoarthritis;Breast cancer;Non-alcoholic fatty liver disease;Chronic kidney disease;Skeletal anomaly;Hepatic fibrosis/cirrhosis;Hyper-lipoproteinaemia;Type 2 diabetes mellitus
T51426	NR1H4	Successful target	D0TH6M	PMID30259754-Compound-LY2562175	Patented	Autoimmune liver disease;Cholelithiasis;Insomnia;Osteoarthritis;Breast cancer;Non-alcoholic fatty liver disease;Chronic kidney disease;Skeletal anomaly;Hepatic fibrosis/cirrhosis;Hyper-lipoproteinaemia;Type 2 diabetes mellitus
T51426	NR1H4	Successful target	D0TL4F	PMID29649907-Compound-23	Patented	Autoimmune liver disease;Cholelithiasis;Insomnia;Osteoarthritis;Breast cancer;Non-alcoholic fatty liver disease;Chronic kidney disease;Skeletal anomaly;Hepatic fibrosis/cirrhosis;Hyper-lipoproteinaemia;Type 2 diabetes mellitus
T51426	NR1H4	Successful target	D0U0CC	PMID29649907-Compound-11	Patented	Autoimmune liver disease;Cholelithiasis;Insomnia;Osteoarthritis;Breast cancer;Non-alcoholic fatty liver disease;Chronic kidney disease;Skeletal anomaly;Hepatic fibrosis/cirrhosis;Hyper-lipoproteinaemia;Type 2 diabetes mellitus
T51426	NR1H4	Successful target	D0UW8Q	PMID29649907-Compound-32	Patented	Autoimmune liver disease;Cholelithiasis;Insomnia;Osteoarthritis;Breast cancer;Non-alcoholic fatty liver disease;Chronic kidney disease;Skeletal anomaly;Hepatic fibrosis/cirrhosis;Hyper-lipoproteinaemia;Type 2 diabetes mellitus
T51426	NR1H4	Successful target	D0WA9U	PMID29649907-Compound-1	Patented	Autoimmune liver disease;Cholelithiasis;Insomnia;Osteoarthritis;Breast cancer;Non-alcoholic fatty liver disease;Chronic kidney disease;Skeletal anomaly;Hepatic fibrosis/cirrhosis;Hyper-lipoproteinaemia;Type 2 diabetes mellitus
T51426	NR1H4	Successful target	D0WT7M	PMID29649907-Compound-38	Patented	Autoimmune liver disease;Cholelithiasis;Insomnia;Osteoarthritis;Breast cancer;Non-alcoholic fatty liver disease;Chronic kidney disease;Skeletal anomaly;Hepatic fibrosis/cirrhosis;Hyper-lipoproteinaemia;Type 2 diabetes mellitus
T51426	NR1H4	Successful target	D0X4YY	1,1-bisphosphonate esters	Investigative	Autoimmune liver disease;Cholelithiasis;Insomnia;Osteoarthritis;Breast cancer;Non-alcoholic fatty liver disease;Chronic kidney disease;Skeletal anomaly;Hepatic fibrosis/cirrhosis;Hyper-lipoproteinaemia;Type 2 diabetes mellitus
T51426	NR1H4	Successful target	D0Y0LI	PMID29649907-Compound-40	Patented	Autoimmune liver disease;Cholelithiasis;Insomnia;Osteoarthritis;Breast cancer;Non-alcoholic fatty liver disease;Chronic kidney disease;Skeletal anomaly;Hepatic fibrosis/cirrhosis;Hyper-lipoproteinaemia;Type 2 diabetes mellitus
T51426	NR1H4	Successful target	D0Y3NZ	PMID29649907-Compound-42	Patented	Autoimmune liver disease;Cholelithiasis;Insomnia;Osteoarthritis;Breast cancer;Non-alcoholic fatty liver disease;Chronic kidney disease;Skeletal anomaly;Hepatic fibrosis/cirrhosis;Hyper-lipoproteinaemia;Type 2 diabetes mellitus
T51426	NR1H4	Successful target	D0YK9Q	PMID29649907-Compound-37	Patented	Autoimmune liver disease;Cholelithiasis;Insomnia;Osteoarthritis;Breast cancer;Non-alcoholic fatty liver disease;Chronic kidney disease;Skeletal anomaly;Hepatic fibrosis/cirrhosis;Hyper-lipoproteinaemia;Type 2 diabetes mellitus
T51426	NR1H4	Successful target	D0Z0FP	PMID29649907-Compound-34	Patented	Autoimmune liver disease;Cholelithiasis;Insomnia;Osteoarthritis;Breast cancer;Non-alcoholic fatty liver disease;Chronic kidney disease;Skeletal anomaly;Hepatic fibrosis/cirrhosis;Hyper-lipoproteinaemia;Type 2 diabetes mellitus
T51426	NR1H4	Successful target	D0ZG3D	PMID29649907-Compound-30	Patented	Autoimmune liver disease;Cholelithiasis;Insomnia;Osteoarthritis;Breast cancer;Non-alcoholic fatty liver disease;Chronic kidney disease;Skeletal anomaly;Hepatic fibrosis/cirrhosis;Hyper-lipoproteinaemia;Type 2 diabetes mellitus
T51426	NR1H4	Successful target	D4PV0B	AGN-242266	Phase 1	Autoimmune liver disease;Cholelithiasis;Insomnia;Osteoarthritis;Breast cancer;Non-alcoholic fatty liver disease;Chronic kidney disease;Skeletal anomaly;Hepatic fibrosis/cirrhosis;Hyper-lipoproteinaemia;Type 2 diabetes mellitus
T51426	NR1H4	Successful target	D7LQJ8	PX-102	Phase 1	Autoimmune liver disease;Cholelithiasis;Insomnia;Osteoarthritis;Breast cancer;Non-alcoholic fatty liver disease;Chronic kidney disease;Skeletal anomaly;Hepatic fibrosis/cirrhosis;Hyper-lipoproteinaemia;Type 2 diabetes mellitus
T51426	NR1H4	Successful target	DBND71	GS-9674	Phase 3	Autoimmune liver disease;Cholelithiasis;Insomnia;Osteoarthritis;Breast cancer;Non-alcoholic fatty liver disease;Chronic kidney disease;Skeletal anomaly;Hepatic fibrosis/cirrhosis;Hyper-lipoproteinaemia;Type 2 diabetes mellitus
T51426	NR1H4	Successful target	DBU2W3	EYP001	Phase 2	Autoimmune liver disease;Cholelithiasis;Insomnia;Osteoarthritis;Breast cancer;Non-alcoholic fatty liver disease;Chronic kidney disease;Skeletal anomaly;Hepatic fibrosis/cirrhosis;Hyper-lipoproteinaemia;Type 2 diabetes mellitus
T51426	NR1H4	Successful target	DM4K9V	EDP-305	Phase 2	Autoimmune liver disease;Cholelithiasis;Insomnia;Osteoarthritis;Breast cancer;Non-alcoholic fatty liver disease;Chronic kidney disease;Skeletal anomaly;Hepatic fibrosis/cirrhosis;Hyper-lipoproteinaemia;Type 2 diabetes mellitus
T51426	NR1H4	Successful target	DNZ96J	INT-767	Preclinical	Autoimmune liver disease;Cholelithiasis;Insomnia;Osteoarthritis;Breast cancer;Non-alcoholic fatty liver disease;Chronic kidney disease;Skeletal anomaly;Hepatic fibrosis/cirrhosis;Hyper-lipoproteinaemia;Type 2 diabetes mellitus
T51426	NR1H4	Successful target	DW9ML8	LMB763	Phase 2	Autoimmune liver disease;Cholelithiasis;Insomnia;Osteoarthritis;Breast cancer;Non-alcoholic fatty liver disease;Chronic kidney disease;Skeletal anomaly;Hepatic fibrosis/cirrhosis;Hyper-lipoproteinaemia;Type 2 diabetes mellitus
T51426	NR1H4	Successful target	DX56JK	MET409	Phase 2	Autoimmune liver disease;Cholelithiasis;Insomnia;Osteoarthritis;Breast cancer;Non-alcoholic fatty liver disease;Chronic kidney disease;Skeletal anomaly;Hepatic fibrosis/cirrhosis;Hyper-lipoproteinaemia;Type 2 diabetes mellitus
T52297	NR1H3	Patented-recorded target	D00DLU	GSK-9772	Investigative	Depression
T52297	NR1H3	Patented-recorded target	D00HVP	Riccardin C	Investigative	Depression
T52297	NR1H3	Patented-recorded target	D01HDD	2-benzyl-4,5,6,7-tetrachloroisoindoline-1,3-dione	Investigative	Depression
T52297	NR1H3	Patented-recorded target	D01RNA	desmosterol	Investigative	Depression
T52297	NR1H3	Patented-recorded target	D03UAE	US9073931, E2	Patented	Depression
T52297	NR1H3	Patented-recorded target	D03YUL	AZ12260493	Investigative	Depression
T52297	NR1H3	Patented-recorded target	D04XII	BDBM50177019	Patented	Depression
T52297	NR1H3	Patented-recorded target	D06VRA	4,17-dehydroxyriccardin C	Investigative	Depression
T52297	NR1H3	Patented-recorded target	D07OBG	5-chloro-2-(4-phenylbutyl)isoindoline-1,3-dione	Investigative	Depression
T52297	NR1H3	Patented-recorded target	D07QIZ	US9006244, E2b	Patented	Depression
T52297	NR1H3	Patented-recorded target	D07QYV	US9073931, E1	Patented	Depression
T52297	NR1H3	Patented-recorded target	D07XLQ	N-{4-[2-(4-Methoxyphenyl)ethyl]phenyl}phthalimide	Investigative	Depression
T52297	NR1H3	Patented-recorded target	D08QXD	L-783483	Investigative	Depression
T52297	NR1H3	Patented-recorded target	D08URT	24(S)-hydroxycholesterol	Investigative	Depression
T52297	NR1H3	Patented-recorded target	D09UND	12,17-dehydroxyriccardin C	Investigative	Depression
T52297	NR1H3	Patented-recorded target	D09VLE	4,12,17-dehydroxyriccardin C	Investigative	Depression
T52297	NR1H3	Patented-recorded target	D0A1WR	SR9238	Investigative	Depression
T52297	NR1H3	Patented-recorded target	D0C2CY	WAY-254011	Investigative	Depression
T52297	NR1H3	Patented-recorded target	D0C6QI	acetyl-podocarpic dimer	Investigative	Depression
T52297	NR1H3	Patented-recorded target	D0D8FE	Guttiferone I	Investigative	Depression
T52297	NR1H3	Patented-recorded target	D0H2YM	27-hydroxycholesterol	Investigative	Depression
T52297	NR1H3	Patented-recorded target	D0HA0U	12-dehydroxyriccardin C	Investigative	Depression
T52297	NR1H3	Patented-recorded target	D0IZ9O	4-dehydroxyriccardin C	Investigative	Depression
T52297	NR1H3	Patented-recorded target	D0K4GK	22R-hydroxycholesterol	Investigative	Depression
T52297	NR1H3	Patented-recorded target	D0K8GC	US9006244, E1	Patented	Depression
T52297	NR1H3	Patented-recorded target	D0L1CX	N-{4-[2-(3-Hydroxyphenyl)ethyl]phenyl}phthalimide	Investigative	Depression
T52297	NR1H3	Patented-recorded target	D0PL4F	GW-3965	Investigative	Depression
T52297	NR1H3	Patented-recorded target	D0Q2RP	24(S), 25-epoxycholesterol	Investigative	Depression
T52297	NR1H3	Patented-recorded target	D0R8LN	N-{4-[2-(3-Methoxyphenyl)ethyl]phenyl}phthalimide	Investigative	Depression
T52297	NR1H3	Patented-recorded target	D0TG1V	BDBM50177012	Patented	Depression
T52297	NR1H3	Patented-recorded target	D0U2EG	US9006244, E2a	Patented	Depression
T52297	NR1H3	Patented-recorded target	D0U4TN	2-(2-hexylphenyl)isoindoline-1,3-dione	Investigative	Depression
T52297	NR1H3	Patented-recorded target	D0V4RZ	WAY-214950	Investigative	Depression
T52297	NR1H3	Patented-recorded target	D0V4WT	paxilline	Investigative	Depression
T52297	NR1H3	Patented-recorded target	D0W1XE	67S	Patented	Depression
T52297	NR1H3	Patented-recorded target	D0X2HK	N-{4-[2-(4-Hydroxyphenyl)ethyl]phenyl}phthalimide	Investigative	Depression
T52297	NR1H3	Patented-recorded target	D0X5DT	2-(2-phenethylphenyl)isoindoline-1,3-dione	Investigative	Depression
T52297	NR1H3	Patented-recorded target	D0Y7ZA	US9073931, E3	Patented	Depression
T52297	NR1H3	Patented-recorded target	D0Z3TJ	GSK2033	Investigative	Depression
T52297	NR1H3	Patented-recorded target	D0Z8LE	17-dehydroxyriccardin C	Investigative	Depression
T52297	NR1H3	Patented-recorded target	D0Z8RH	2-Benzyl-3-phenyl-7-(trifluoromethyl)-2H-indazole	Investigative	Depression
T53585	HMGCR	Successful target	D00RHH	PMID17574411C41	Investigative	Blood/blood-forming organ sympton;Cardiovascular disease;Dyslipidemia;Hepatitis virus infection;Hyper-lipoproteinaemia;Multiple myeloma;Multiple sclerosis;Myocardial infarction;Pain;Rheumatoid arthritis;Arterial occlusive disease;Coronary atherosclerosis;Thrombosis
T53585	HMGCR	Successful target	D00TBG	PMID8246233C5ab	Investigative	Blood/blood-forming organ sympton;Cardiovascular disease;Dyslipidemia;Hepatitis virus infection;Hyper-lipoproteinaemia;Multiple myeloma;Multiple sclerosis;Myocardial infarction;Pain;Rheumatoid arthritis;Arterial occlusive disease;Coronary atherosclerosis;Thrombosis
T53585	HMGCR	Successful target	D00TIO	PMID1656041C4ff	Investigative	Blood/blood-forming organ sympton;Cardiovascular disease;Dyslipidemia;Hepatitis virus infection;Hyper-lipoproteinaemia;Multiple myeloma;Multiple sclerosis;Myocardial infarction;Pain;Rheumatoid arthritis;Arterial occlusive disease;Coronary atherosclerosis;Thrombosis
T53585	HMGCR	Successful target	D00UOI	PMID17574412C33	Investigative	Blood/blood-forming organ sympton;Cardiovascular disease;Dyslipidemia;Hepatitis virus infection;Hyper-lipoproteinaemia;Multiple myeloma;Multiple sclerosis;Myocardial infarction;Pain;Rheumatoid arthritis;Arterial occlusive disease;Coronary atherosclerosis;Thrombosis
T53585	HMGCR	Successful target	D00VMO	PMID1992149C13	Investigative	Blood/blood-forming organ sympton;Cardiovascular disease;Dyslipidemia;Hepatitis virus infection;Hyper-lipoproteinaemia;Multiple myeloma;Multiple sclerosis;Myocardial infarction;Pain;Rheumatoid arthritis;Arterial occlusive disease;Coronary atherosclerosis;Thrombosis
T53585	HMGCR	Successful target	D00YVL	PMID27537201-Compound-Figure15a	Patented	Blood/blood-forming organ sympton;Cardiovascular disease;Dyslipidemia;Hepatitis virus infection;Hyper-lipoproteinaemia;Multiple myeloma;Multiple sclerosis;Myocardial infarction;Pain;Rheumatoid arthritis;Arterial occlusive disease;Coronary atherosclerosis;Thrombosis
T53585	HMGCR	Successful target	D00ZJG	PMID2231594C3k	Investigative	Blood/blood-forming organ sympton;Cardiovascular disease;Dyslipidemia;Hepatitis virus infection;Hyper-lipoproteinaemia;Multiple myeloma;Multiple sclerosis;Myocardial infarction;Pain;Rheumatoid arthritis;Arterial occlusive disease;Coronary atherosclerosis;Thrombosis
T53585	HMGCR	Successful target	D01GMJ	1,4-Dithiothreitol	Investigative	Blood/blood-forming organ sympton;Cardiovascular disease;Dyslipidemia;Hepatitis virus infection;Hyper-lipoproteinaemia;Multiple myeloma;Multiple sclerosis;Myocardial infarction;Pain;Rheumatoid arthritis;Arterial occlusive disease;Coronary atherosclerosis;Thrombosis
T53585	HMGCR	Successful target	D01QIN	Atorvastatin	Approved	Blood/blood-forming organ sympton;Cardiovascular disease;Dyslipidemia;Hepatitis virus infection;Hyper-lipoproteinaemia;Multiple myeloma;Multiple sclerosis;Myocardial infarction;Pain;Rheumatoid arthritis;Arterial occlusive disease;Coronary atherosclerosis;Thrombosis
T53585	HMGCR	Successful target	D01WQF	FPYVAE peptide	Investigative	Blood/blood-forming organ sympton;Cardiovascular disease;Dyslipidemia;Hepatitis virus infection;Hyper-lipoproteinaemia;Multiple myeloma;Multiple sclerosis;Myocardial infarction;Pain;Rheumatoid arthritis;Arterial occlusive disease;Coronary atherosclerosis;Thrombosis
T53585	HMGCR	Successful target	D01XMY	PMID1895299C1	Investigative	Blood/blood-forming organ sympton;Cardiovascular disease;Dyslipidemia;Hepatitis virus infection;Hyper-lipoproteinaemia;Multiple myeloma;Multiple sclerosis;Myocardial infarction;Pain;Rheumatoid arthritis;Arterial occlusive disease;Coronary atherosclerosis;Thrombosis
T53585	HMGCR	Successful target	D01YQX	6-hydroxy-7,9-octadecadiynoic acid	Investigative	Blood/blood-forming organ sympton;Cardiovascular disease;Dyslipidemia;Hepatitis virus infection;Hyper-lipoproteinaemia;Multiple myeloma;Multiple sclerosis;Myocardial infarction;Pain;Rheumatoid arthritis;Arterial occlusive disease;Coronary atherosclerosis;Thrombosis
T53585	HMGCR	Successful target	D01ZAL	PMID2296036C4i	Investigative	Blood/blood-forming organ sympton;Cardiovascular disease;Dyslipidemia;Hepatitis virus infection;Hyper-lipoproteinaemia;Multiple myeloma;Multiple sclerosis;Myocardial infarction;Pain;Rheumatoid arthritis;Arterial occlusive disease;Coronary atherosclerosis;Thrombosis
T53585	HMGCR	Successful target	D02EQL	PMID2231594C3u	Investigative	Blood/blood-forming organ sympton;Cardiovascular disease;Dyslipidemia;Hepatitis virus infection;Hyper-lipoproteinaemia;Multiple myeloma;Multiple sclerosis;Myocardial infarction;Pain;Rheumatoid arthritis;Arterial occlusive disease;Coronary atherosclerosis;Thrombosis
T53585	HMGCR	Successful target	D02ITS	PMID1992149C9	Investigative	Blood/blood-forming organ sympton;Cardiovascular disease;Dyslipidemia;Hepatitis virus infection;Hyper-lipoproteinaemia;Multiple myeloma;Multiple sclerosis;Myocardial infarction;Pain;Rheumatoid arthritis;Arterial occlusive disease;Coronary atherosclerosis;Thrombosis
T53585	HMGCR	Successful target	D02MEX	PMID2153213C2c	Investigative	Blood/blood-forming organ sympton;Cardiovascular disease;Dyslipidemia;Hepatitis virus infection;Hyper-lipoproteinaemia;Multiple myeloma;Multiple sclerosis;Myocardial infarction;Pain;Rheumatoid arthritis;Arterial occlusive disease;Coronary atherosclerosis;Thrombosis
T53585	HMGCR	Successful target	D02OET	PMID1895299C4p	Investigative	Blood/blood-forming organ sympton;Cardiovascular disease;Dyslipidemia;Hepatitis virus infection;Hyper-lipoproteinaemia;Multiple myeloma;Multiple sclerosis;Myocardial infarction;Pain;Rheumatoid arthritis;Arterial occlusive disease;Coronary atherosclerosis;Thrombosis
T53585	HMGCR	Successful target	D02RQU	Pravastatin	Approved	Blood/blood-forming organ sympton;Cardiovascular disease;Dyslipidemia;Hepatitis virus infection;Hyper-lipoproteinaemia;Multiple myeloma;Multiple sclerosis;Myocardial infarction;Pain;Rheumatoid arthritis;Arterial occlusive disease;Coronary atherosclerosis;Thrombosis
T53585	HMGCR	Successful target	D02SRB	BPL-001	Investigative	Blood/blood-forming organ sympton;Cardiovascular disease;Dyslipidemia;Hepatitis virus infection;Hyper-lipoproteinaemia;Multiple myeloma;Multiple sclerosis;Myocardial infarction;Pain;Rheumatoid arthritis;Arterial occlusive disease;Coronary atherosclerosis;Thrombosis
T53585	HMGCR	Successful target	D02TIT	PMID18412317C13b	Investigative	Blood/blood-forming organ sympton;Cardiovascular disease;Dyslipidemia;Hepatitis virus infection;Hyper-lipoproteinaemia;Multiple myeloma;Multiple sclerosis;Myocardial infarction;Pain;Rheumatoid arthritis;Arterial occlusive disease;Coronary atherosclerosis;Thrombosis
T53585	HMGCR	Successful target	D03CYY	GFPDGG	Investigative	Blood/blood-forming organ sympton;Cardiovascular disease;Dyslipidemia;Hepatitis virus infection;Hyper-lipoproteinaemia;Multiple myeloma;Multiple sclerosis;Myocardial infarction;Pain;Rheumatoid arthritis;Arterial occlusive disease;Coronary atherosclerosis;Thrombosis
T53585	HMGCR	Successful target	D03EAN	PMID2153213C1e	Investigative	Blood/blood-forming organ sympton;Cardiovascular disease;Dyslipidemia;Hepatitis virus infection;Hyper-lipoproteinaemia;Multiple myeloma;Multiple sclerosis;Myocardial infarction;Pain;Rheumatoid arthritis;Arterial occlusive disease;Coronary atherosclerosis;Thrombosis
T53585	HMGCR	Successful target	D03GRA	(R)-Mevalonate	Investigative	Blood/blood-forming organ sympton;Cardiovascular disease;Dyslipidemia;Hepatitis virus infection;Hyper-lipoproteinaemia;Multiple myeloma;Multiple sclerosis;Myocardial infarction;Pain;Rheumatoid arthritis;Arterial occlusive disease;Coronary atherosclerosis;Thrombosis
T53585	HMGCR	Successful target	D03HKN	PMID27537201-Compound-Figure13b	Patented	Blood/blood-forming organ sympton;Cardiovascular disease;Dyslipidemia;Hepatitis virus infection;Hyper-lipoproteinaemia;Multiple myeloma;Multiple sclerosis;Myocardial infarction;Pain;Rheumatoid arthritis;Arterial occlusive disease;Coronary atherosclerosis;Thrombosis
T53585	HMGCR	Successful target	D03KIA	Cerivastatin	Approved	Blood/blood-forming organ sympton;Cardiovascular disease;Dyslipidemia;Hepatitis virus infection;Hyper-lipoproteinaemia;Multiple myeloma;Multiple sclerosis;Myocardial infarction;Pain;Rheumatoid arthritis;Arterial occlusive disease;Coronary atherosclerosis;Thrombosis
T53585	HMGCR	Successful target	D03TKT	o-hydroxyatorvastatin	Investigative	Blood/blood-forming organ sympton;Cardiovascular disease;Dyslipidemia;Hepatitis virus infection;Hyper-lipoproteinaemia;Multiple myeloma;Multiple sclerosis;Myocardial infarction;Pain;Rheumatoid arthritis;Arterial occlusive disease;Coronary atherosclerosis;Thrombosis
T53585	HMGCR	Successful target	D03VFL	TOCOTRIENOL	Approved	Blood/blood-forming organ sympton;Cardiovascular disease;Dyslipidemia;Hepatitis virus infection;Hyper-lipoproteinaemia;Multiple myeloma;Multiple sclerosis;Myocardial infarction;Pain;Rheumatoid arthritis;Arterial occlusive disease;Coronary atherosclerosis;Thrombosis
T53585	HMGCR	Successful target	D03ZIK	MT-001	Investigative	Blood/blood-forming organ sympton;Cardiovascular disease;Dyslipidemia;Hepatitis virus infection;Hyper-lipoproteinaemia;Multiple myeloma;Multiple sclerosis;Myocardial infarction;Pain;Rheumatoid arthritis;Arterial occlusive disease;Coronary atherosclerosis;Thrombosis
T53585	HMGCR	Successful target	D04MFJ	Quinoline derivative 17	Patented	Blood/blood-forming organ sympton;Cardiovascular disease;Dyslipidemia;Hepatitis virus infection;Hyper-lipoproteinaemia;Multiple myeloma;Multiple sclerosis;Myocardial infarction;Pain;Rheumatoid arthritis;Arterial occlusive disease;Coronary atherosclerosis;Thrombosis
T53585	HMGCR	Successful target	D04XGU	Crestor/TriLipix	Approved	Blood/blood-forming organ sympton;Cardiovascular disease;Dyslipidemia;Hepatitis virus infection;Hyper-lipoproteinaemia;Multiple myeloma;Multiple sclerosis;Myocardial infarction;Pain;Rheumatoid arthritis;Arterial occlusive disease;Coronary atherosclerosis;Thrombosis
T53585	HMGCR	Successful target	D04XQG	NCX-1067	Investigative	Blood/blood-forming organ sympton;Cardiovascular disease;Dyslipidemia;Hepatitis virus infection;Hyper-lipoproteinaemia;Multiple myeloma;Multiple sclerosis;Myocardial infarction;Pain;Rheumatoid arthritis;Arterial occlusive disease;Coronary atherosclerosis;Thrombosis
T53585	HMGCR	Successful target	D05GWF	PMID2153213C2d	Investigative	Blood/blood-forming organ sympton;Cardiovascular disease;Dyslipidemia;Hepatitis virus infection;Hyper-lipoproteinaemia;Multiple myeloma;Multiple sclerosis;Myocardial infarction;Pain;Rheumatoid arthritis;Arterial occlusive disease;Coronary atherosclerosis;Thrombosis
T53585	HMGCR	Successful target	D05SOY	Hexahydro naphthalene derivative 3	Patented	Blood/blood-forming organ sympton;Cardiovascular disease;Dyslipidemia;Hepatitis virus infection;Hyper-lipoproteinaemia;Multiple myeloma;Multiple sclerosis;Myocardial infarction;Pain;Rheumatoid arthritis;Arterial occlusive disease;Coronary atherosclerosis;Thrombosis
T53585	HMGCR	Successful target	D05UQC	PMID2296036C2t	Investigative	Blood/blood-forming organ sympton;Cardiovascular disease;Dyslipidemia;Hepatitis virus infection;Hyper-lipoproteinaemia;Multiple myeloma;Multiple sclerosis;Myocardial infarction;Pain;Rheumatoid arthritis;Arterial occlusive disease;Coronary atherosclerosis;Thrombosis
T53585	HMGCR	Successful target	D05YUT	PMID8426367C18	Investigative	Blood/blood-forming organ sympton;Cardiovascular disease;Dyslipidemia;Hepatitis virus infection;Hyper-lipoproteinaemia;Multiple myeloma;Multiple sclerosis;Myocardial infarction;Pain;Rheumatoid arthritis;Arterial occlusive disease;Coronary atherosclerosis;Thrombosis
T53585	HMGCR	Successful target	D06BBV	XZK-monascus	Phase 2	Blood/blood-forming organ sympton;Cardiovascular disease;Dyslipidemia;Hepatitis virus infection;Hyper-lipoproteinaemia;Multiple myeloma;Multiple sclerosis;Myocardial infarction;Pain;Rheumatoid arthritis;Arterial occlusive disease;Coronary atherosclerosis;Thrombosis
T53585	HMGCR	Successful target	D06BIF	PMID2153213C13b	Investigative	Blood/blood-forming organ sympton;Cardiovascular disease;Dyslipidemia;Hepatitis virus infection;Hyper-lipoproteinaemia;Multiple myeloma;Multiple sclerosis;Myocardial infarction;Pain;Rheumatoid arthritis;Arterial occlusive disease;Coronary atherosclerosis;Thrombosis
T53585	HMGCR	Successful target	D06FRE	PMID1656041C11dd	Investigative	Blood/blood-forming organ sympton;Cardiovascular disease;Dyslipidemia;Hepatitis virus infection;Hyper-lipoproteinaemia;Multiple myeloma;Multiple sclerosis;Myocardial infarction;Pain;Rheumatoid arthritis;Arterial occlusive disease;Coronary atherosclerosis;Thrombosis
T53585	HMGCR	Successful target	D06HNA	PMID1875346C18	Investigative	Blood/blood-forming organ sympton;Cardiovascular disease;Dyslipidemia;Hepatitis virus infection;Hyper-lipoproteinaemia;Multiple myeloma;Multiple sclerosis;Myocardial infarction;Pain;Rheumatoid arthritis;Arterial occlusive disease;Coronary atherosclerosis;Thrombosis
T53585	HMGCR	Successful target	D06WTZ	Lovastatin	Approved	Blood/blood-forming organ sympton;Cardiovascular disease;Dyslipidemia;Hepatitis virus infection;Hyper-lipoproteinaemia;Multiple myeloma;Multiple sclerosis;Myocardial infarction;Pain;Rheumatoid arthritis;Arterial occlusive disease;Coronary atherosclerosis;Thrombosis
T53585	HMGCR	Successful target	D07QAX	PMID15686906C17	Investigative	Blood/blood-forming organ sympton;Cardiovascular disease;Dyslipidemia;Hepatitis virus infection;Hyper-lipoproteinaemia;Multiple myeloma;Multiple sclerosis;Myocardial infarction;Pain;Rheumatoid arthritis;Arterial occlusive disease;Coronary atherosclerosis;Thrombosis
T53585	HMGCR	Successful target	D07QFP	Teriflunomide	Approved	Blood/blood-forming organ sympton;Cardiovascular disease;Dyslipidemia;Hepatitis virus infection;Hyper-lipoproteinaemia;Multiple myeloma;Multiple sclerosis;Myocardial infarction;Pain;Rheumatoid arthritis;Arterial occlusive disease;Coronary atherosclerosis;Thrombosis
T53585	HMGCR	Successful target	D07VEB	PMID8246234C3h	Investigative	Blood/blood-forming organ sympton;Cardiovascular disease;Dyslipidemia;Hepatitis virus infection;Hyper-lipoproteinaemia;Multiple myeloma;Multiple sclerosis;Myocardial infarction;Pain;Rheumatoid arthritis;Arterial occlusive disease;Coronary atherosclerosis;Thrombosis
T53585	HMGCR	Successful target	D08FMC	Sterol derivative 1	Patented	Blood/blood-forming organ sympton;Cardiovascular disease;Dyslipidemia;Hepatitis virus infection;Hyper-lipoproteinaemia;Multiple myeloma;Multiple sclerosis;Myocardial infarction;Pain;Rheumatoid arthritis;Arterial occlusive disease;Coronary atherosclerosis;Thrombosis
T53585	HMGCR	Successful target	D08GHB	Fluvastatin	Approved	Blood/blood-forming organ sympton;Cardiovascular disease;Dyslipidemia;Hepatitis virus infection;Hyper-lipoproteinaemia;Multiple myeloma;Multiple sclerosis;Myocardial infarction;Pain;Rheumatoid arthritis;Arterial occlusive disease;Coronary atherosclerosis;Thrombosis
T53585	HMGCR	Successful target	D08SKU	3-(1,3 dodecadiynyl)-6-oxiranebutanoic acid	Investigative	Blood/blood-forming organ sympton;Cardiovascular disease;Dyslipidemia;Hepatitis virus infection;Hyper-lipoproteinaemia;Multiple myeloma;Multiple sclerosis;Myocardial infarction;Pain;Rheumatoid arthritis;Arterial occlusive disease;Coronary atherosclerosis;Thrombosis
T53585	HMGCR	Successful target	D09CSQ	DFGYVAE	Investigative	Blood/blood-forming organ sympton;Cardiovascular disease;Dyslipidemia;Hepatitis virus infection;Hyper-lipoproteinaemia;Multiple myeloma;Multiple sclerosis;Myocardial infarction;Pain;Rheumatoid arthritis;Arterial occlusive disease;Coronary atherosclerosis;Thrombosis
T53585	HMGCR	Successful target	D09EBV	7,9-tetradecadiynoic acid	Investigative	Blood/blood-forming organ sympton;Cardiovascular disease;Dyslipidemia;Hepatitis virus infection;Hyper-lipoproteinaemia;Multiple myeloma;Multiple sclerosis;Myocardial infarction;Pain;Rheumatoid arthritis;Arterial occlusive disease;Coronary atherosclerosis;Thrombosis
T53585	HMGCR	Successful target	D09QIA	9-octadecynoic acid	Investigative	Blood/blood-forming organ sympton;Cardiovascular disease;Dyslipidemia;Hepatitis virus infection;Hyper-lipoproteinaemia;Multiple myeloma;Multiple sclerosis;Myocardial infarction;Pain;Rheumatoid arthritis;Arterial occlusive disease;Coronary atherosclerosis;Thrombosis
T53585	HMGCR	Successful target	D09TKN	PMID2153213C13g	Investigative	Blood/blood-forming organ sympton;Cardiovascular disease;Dyslipidemia;Hepatitis virus infection;Hyper-lipoproteinaemia;Multiple myeloma;Multiple sclerosis;Myocardial infarction;Pain;Rheumatoid arthritis;Arterial occlusive disease;Coronary atherosclerosis;Thrombosis
T53585	HMGCR	Successful target	D09ZXW	Atorvastatin lactole derivative 1	Patented	Blood/blood-forming organ sympton;Cardiovascular disease;Dyslipidemia;Hepatitis virus infection;Hyper-lipoproteinaemia;Multiple myeloma;Multiple sclerosis;Myocardial infarction;Pain;Rheumatoid arthritis;Arterial occlusive disease;Coronary atherosclerosis;Thrombosis
T53585	HMGCR	Successful target	D0A6FX	(E)-octadecan-9-ynoic acid	Investigative	Blood/blood-forming organ sympton;Cardiovascular disease;Dyslipidemia;Hepatitis virus infection;Hyper-lipoproteinaemia;Multiple myeloma;Multiple sclerosis;Myocardial infarction;Pain;Rheumatoid arthritis;Arterial occlusive disease;Coronary atherosclerosis;Thrombosis
T53585	HMGCR	Successful target	D0AP6V	Poly-substituted azoles statin lactone derivative 2	Patented	Blood/blood-forming organ sympton;Cardiovascular disease;Dyslipidemia;Hepatitis virus infection;Hyper-lipoproteinaemia;Multiple myeloma;Multiple sclerosis;Myocardial infarction;Pain;Rheumatoid arthritis;Arterial occlusive disease;Coronary atherosclerosis;Thrombosis
T53585	HMGCR	Successful target	D0AY4N	Lactol derivative 1	Patented	Blood/blood-forming organ sympton;Cardiovascular disease;Dyslipidemia;Hepatitis virus infection;Hyper-lipoproteinaemia;Multiple myeloma;Multiple sclerosis;Myocardial infarction;Pain;Rheumatoid arthritis;Arterial occlusive disease;Coronary atherosclerosis;Thrombosis
T53585	HMGCR	Successful target	D0B2FM	GLPTGG	Investigative	Blood/blood-forming organ sympton;Cardiovascular disease;Dyslipidemia;Hepatitis virus infection;Hyper-lipoproteinaemia;Multiple myeloma;Multiple sclerosis;Myocardial infarction;Pain;Rheumatoid arthritis;Arterial occlusive disease;Coronary atherosclerosis;Thrombosis
T53585	HMGCR	Successful target	D0C1RY	GFPEGG	Investigative	Blood/blood-forming organ sympton;Cardiovascular disease;Dyslipidemia;Hepatitis virus infection;Hyper-lipoproteinaemia;Multiple myeloma;Multiple sclerosis;Myocardial infarction;Pain;Rheumatoid arthritis;Arterial occlusive disease;Coronary atherosclerosis;Thrombosis
T53585	HMGCR	Successful target	D0C5LO	7,9-octadecadiynoic acid	Investigative	Blood/blood-forming organ sympton;Cardiovascular disease;Dyslipidemia;Hepatitis virus infection;Hyper-lipoproteinaemia;Multiple myeloma;Multiple sclerosis;Myocardial infarction;Pain;Rheumatoid arthritis;Arterial occlusive disease;Coronary atherosclerosis;Thrombosis
T53585	HMGCR	Successful target	D0C8HK	(E)-5-octadecen-7,9-diynoic acid	Investigative	Blood/blood-forming organ sympton;Cardiovascular disease;Dyslipidemia;Hepatitis virus infection;Hyper-lipoproteinaemia;Multiple myeloma;Multiple sclerosis;Myocardial infarction;Pain;Rheumatoid arthritis;Arterial occlusive disease;Coronary atherosclerosis;Thrombosis
T53585	HMGCR	Successful target	D0CC8L	CRILVASTATIN	Phase 2	Blood/blood-forming organ sympton;Cardiovascular disease;Dyslipidemia;Hepatitis virus infection;Hyper-lipoproteinaemia;Multiple myeloma;Multiple sclerosis;Myocardial infarction;Pain;Rheumatoid arthritis;Arterial occlusive disease;Coronary atherosclerosis;Thrombosis
T53585	HMGCR	Successful target	D0CM4R	Lactol derivative 2	Patented	Blood/blood-forming organ sympton;Cardiovascular disease;Dyslipidemia;Hepatitis virus infection;Hyper-lipoproteinaemia;Multiple myeloma;Multiple sclerosis;Myocardial infarction;Pain;Rheumatoid arthritis;Arterial occlusive disease;Coronary atherosclerosis;Thrombosis
T53585	HMGCR	Successful target	D0CU3I	(Z)-7-octedecan-9-ynoic acid	Investigative	Blood/blood-forming organ sympton;Cardiovascular disease;Dyslipidemia;Hepatitis virus infection;Hyper-lipoproteinaemia;Multiple myeloma;Multiple sclerosis;Myocardial infarction;Pain;Rheumatoid arthritis;Arterial occlusive disease;Coronary atherosclerosis;Thrombosis
T53585	HMGCR	Successful target	D0CW2F	Poly-substituted miazine derivative 1	Patented	Blood/blood-forming organ sympton;Cardiovascular disease;Dyslipidemia;Hepatitis virus infection;Hyper-lipoproteinaemia;Multiple myeloma;Multiple sclerosis;Myocardial infarction;Pain;Rheumatoid arthritis;Arterial occlusive disease;Coronary atherosclerosis;Thrombosis
T53585	HMGCR	Successful target	D0EF9J	PMID27537201-Compound-Figure13c	Patented	Blood/blood-forming organ sympton;Cardiovascular disease;Dyslipidemia;Hepatitis virus infection;Hyper-lipoproteinaemia;Multiple myeloma;Multiple sclerosis;Myocardial infarction;Pain;Rheumatoid arthritis;Arterial occlusive disease;Coronary atherosclerosis;Thrombosis
T53585	HMGCR	Successful target	D0FD8Q	PMID8246237C18t	Investigative	Blood/blood-forming organ sympton;Cardiovascular disease;Dyslipidemia;Hepatitis virus infection;Hyper-lipoproteinaemia;Multiple myeloma;Multiple sclerosis;Myocardial infarction;Pain;Rheumatoid arthritis;Arterial occlusive disease;Coronary atherosclerosis;Thrombosis
T53585	HMGCR	Successful target	D0G1WL	PITAVASTATIN CALCIUM	Approved	Blood/blood-forming organ sympton;Cardiovascular disease;Dyslipidemia;Hepatitis virus infection;Hyper-lipoproteinaemia;Multiple myeloma;Multiple sclerosis;Myocardial infarction;Pain;Rheumatoid arthritis;Arterial occlusive disease;Coronary atherosclerosis;Thrombosis
T53585	HMGCR	Successful target	D0G2QW	PMID1992138C8b	Investigative	Blood/blood-forming organ sympton;Cardiovascular disease;Dyslipidemia;Hepatitis virus infection;Hyper-lipoproteinaemia;Multiple myeloma;Multiple sclerosis;Myocardial infarction;Pain;Rheumatoid arthritis;Arterial occlusive disease;Coronary atherosclerosis;Thrombosis
T53585	HMGCR	Successful target	D0G4ZG	PMID2153213C2f	Investigative	Blood/blood-forming organ sympton;Cardiovascular disease;Dyslipidemia;Hepatitis virus infection;Hyper-lipoproteinaemia;Multiple myeloma;Multiple sclerosis;Myocardial infarction;Pain;Rheumatoid arthritis;Arterial occlusive disease;Coronary atherosclerosis;Thrombosis
T53585	HMGCR	Successful target	D0G6PS	PMID17574411C42	Investigative	Blood/blood-forming organ sympton;Cardiovascular disease;Dyslipidemia;Hepatitis virus infection;Hyper-lipoproteinaemia;Multiple myeloma;Multiple sclerosis;Myocardial infarction;Pain;Rheumatoid arthritis;Arterial occlusive disease;Coronary atherosclerosis;Thrombosis
T53585	HMGCR	Successful target	D0G7IV	Premarin/Pravachol	Phase 3	Blood/blood-forming organ sympton;Cardiovascular disease;Dyslipidemia;Hepatitis virus infection;Hyper-lipoproteinaemia;Multiple myeloma;Multiple sclerosis;Myocardial infarction;Pain;Rheumatoid arthritis;Arterial occlusive disease;Coronary atherosclerosis;Thrombosis
T53585	HMGCR	Successful target	D0G8JX	Pitavastatin derivative 1	Patented	Blood/blood-forming organ sympton;Cardiovascular disease;Dyslipidemia;Hepatitis virus infection;Hyper-lipoproteinaemia;Multiple myeloma;Multiple sclerosis;Myocardial infarction;Pain;Rheumatoid arthritis;Arterial occlusive disease;Coronary atherosclerosis;Thrombosis
T53585	HMGCR	Successful target	D0GY5Z	Aspirin	Approved	Blood/blood-forming organ sympton;Cardiovascular disease;Dyslipidemia;Hepatitis virus infection;Hyper-lipoproteinaemia;Multiple myeloma;Multiple sclerosis;Myocardial infarction;Pain;Rheumatoid arthritis;Arterial occlusive disease;Coronary atherosclerosis;Thrombosis
T53585	HMGCR	Successful target	D0H0FX	NCX-6560	Phase 1	Blood/blood-forming organ sympton;Cardiovascular disease;Dyslipidemia;Hepatitis virus infection;Hyper-lipoproteinaemia;Multiple myeloma;Multiple sclerosis;Myocardial infarction;Pain;Rheumatoid arthritis;Arterial occlusive disease;Coronary atherosclerosis;Thrombosis
T53585	HMGCR	Successful target	D0H0ND	Simvastatin	Approved	Blood/blood-forming organ sympton;Cardiovascular disease;Dyslipidemia;Hepatitis virus infection;Hyper-lipoproteinaemia;Multiple myeloma;Multiple sclerosis;Myocardial infarction;Pain;Rheumatoid arthritis;Arterial occlusive disease;Coronary atherosclerosis;Thrombosis
T53585	HMGCR	Successful target	D0I0IM	5-ketodihydromevinolin	Investigative	Blood/blood-forming organ sympton;Cardiovascular disease;Dyslipidemia;Hepatitis virus infection;Hyper-lipoproteinaemia;Multiple myeloma;Multiple sclerosis;Myocardial infarction;Pain;Rheumatoid arthritis;Arterial occlusive disease;Coronary atherosclerosis;Thrombosis
T53585	HMGCR	Successful target	D0I9TR	PMID2296036C4d	Investigative	Blood/blood-forming organ sympton;Cardiovascular disease;Dyslipidemia;Hepatitis virus infection;Hyper-lipoproteinaemia;Multiple myeloma;Multiple sclerosis;Myocardial infarction;Pain;Rheumatoid arthritis;Arterial occlusive disease;Coronary atherosclerosis;Thrombosis
T53585	HMGCR	Successful target	D0IJ7H	3-Hydroxy-3-Methyl-Glutaric Acid	Investigative	Blood/blood-forming organ sympton;Cardiovascular disease;Dyslipidemia;Hepatitis virus infection;Hyper-lipoproteinaemia;Multiple myeloma;Multiple sclerosis;Myocardial infarction;Pain;Rheumatoid arthritis;Arterial occlusive disease;Coronary atherosclerosis;Thrombosis
T53585	HMGCR	Successful target	D0J2FY	2'-Monophosphoadenosine 5'-Diphosphoribose	Investigative	Blood/blood-forming organ sympton;Cardiovascular disease;Dyslipidemia;Hepatitis virus infection;Hyper-lipoproteinaemia;Multiple myeloma;Multiple sclerosis;Myocardial infarction;Pain;Rheumatoid arthritis;Arterial occlusive disease;Coronary atherosclerosis;Thrombosis
T53585	HMGCR	Successful target	D0J8BD	PMID2909732C7	Investigative	Blood/blood-forming organ sympton;Cardiovascular disease;Dyslipidemia;Hepatitis virus infection;Hyper-lipoproteinaemia;Multiple myeloma;Multiple sclerosis;Myocardial infarction;Pain;Rheumatoid arthritis;Arterial occlusive disease;Coronary atherosclerosis;Thrombosis
T53585	HMGCR	Successful target	D0J9DY	PMID2296027C25	Investigative	Blood/blood-forming organ sympton;Cardiovascular disease;Dyslipidemia;Hepatitis virus infection;Hyper-lipoproteinaemia;Multiple myeloma;Multiple sclerosis;Myocardial infarction;Pain;Rheumatoid arthritis;Arterial occlusive disease;Coronary atherosclerosis;Thrombosis
T53585	HMGCR	Successful target	D0JE2E	Rosuvastatin	Approved	Blood/blood-forming organ sympton;Cardiovascular disease;Dyslipidemia;Hepatitis virus infection;Hyper-lipoproteinaemia;Multiple myeloma;Multiple sclerosis;Myocardial infarction;Pain;Rheumatoid arthritis;Arterial occlusive disease;Coronary atherosclerosis;Thrombosis
T53585	HMGCR	Successful target	D0K1MB	PMID7932551C9	Investigative	Blood/blood-forming organ sympton;Cardiovascular disease;Dyslipidemia;Hepatitis virus infection;Hyper-lipoproteinaemia;Multiple myeloma;Multiple sclerosis;Myocardial infarction;Pain;Rheumatoid arthritis;Arterial occlusive disease;Coronary atherosclerosis;Thrombosis
T53585	HMGCR	Successful target	D0KU2T	Pravastatin derivative 1	Patented	Blood/blood-forming organ sympton;Cardiovascular disease;Dyslipidemia;Hepatitis virus infection;Hyper-lipoproteinaemia;Multiple myeloma;Multiple sclerosis;Myocardial infarction;Pain;Rheumatoid arthritis;Arterial occlusive disease;Coronary atherosclerosis;Thrombosis
T53585	HMGCR	Successful target	D0L3BE	Hexahydro naphthalene derivative 1	Patented	Blood/blood-forming organ sympton;Cardiovascular disease;Dyslipidemia;Hepatitis virus infection;Hyper-lipoproteinaemia;Multiple myeloma;Multiple sclerosis;Myocardial infarction;Pain;Rheumatoid arthritis;Arterial occlusive disease;Coronary atherosclerosis;Thrombosis
T53585	HMGCR	Successful target	D0L6HX	PMID18072721C50	Investigative	Blood/blood-forming organ sympton;Cardiovascular disease;Dyslipidemia;Hepatitis virus infection;Hyper-lipoproteinaemia;Multiple myeloma;Multiple sclerosis;Myocardial infarction;Pain;Rheumatoid arthritis;Arterial occlusive disease;Coronary atherosclerosis;Thrombosis
T53585	HMGCR	Successful target	D0LJ0M	2-cyclopropyl-4-substituted-phenoxy-quinoline derivative 1	Patented	Blood/blood-forming organ sympton;Cardiovascular disease;Dyslipidemia;Hepatitis virus infection;Hyper-lipoproteinaemia;Multiple myeloma;Multiple sclerosis;Myocardial infarction;Pain;Rheumatoid arthritis;Arterial occlusive disease;Coronary atherosclerosis;Thrombosis
T53585	HMGCR	Successful target	D0M4YT	PMID1895299C6v	Investigative	Blood/blood-forming organ sympton;Cardiovascular disease;Dyslipidemia;Hepatitis virus infection;Hyper-lipoproteinaemia;Multiple myeloma;Multiple sclerosis;Myocardial infarction;Pain;Rheumatoid arthritis;Arterial occlusive disease;Coronary atherosclerosis;Thrombosis
T53585	HMGCR	Successful target	D0M9BZ	PMID1656041C11nn	Investigative	Blood/blood-forming organ sympton;Cardiovascular disease;Dyslipidemia;Hepatitis virus infection;Hyper-lipoproteinaemia;Multiple myeloma;Multiple sclerosis;Myocardial infarction;Pain;Rheumatoid arthritis;Arterial occlusive disease;Coronary atherosclerosis;Thrombosis
T53585	HMGCR	Successful target	D0M9ZW	Hexahydro naphthalene derivative 2	Patented	Blood/blood-forming organ sympton;Cardiovascular disease;Dyslipidemia;Hepatitis virus infection;Hyper-lipoproteinaemia;Multiple myeloma;Multiple sclerosis;Myocardial infarction;Pain;Rheumatoid arthritis;Arterial occlusive disease;Coronary atherosclerosis;Thrombosis
T53585	HMGCR	Successful target	D0MU7C	PMID2231594C3j	Investigative	Blood/blood-forming organ sympton;Cardiovascular disease;Dyslipidemia;Hepatitis virus infection;Hyper-lipoproteinaemia;Multiple myeloma;Multiple sclerosis;Myocardial infarction;Pain;Rheumatoid arthritis;Arterial occlusive disease;Coronary atherosclerosis;Thrombosis
T53585	HMGCR	Successful target	D0N7RK	PMID19502059C25d	Investigative	Blood/blood-forming organ sympton;Cardiovascular disease;Dyslipidemia;Hepatitis virus infection;Hyper-lipoproteinaemia;Multiple myeloma;Multiple sclerosis;Myocardial infarction;Pain;Rheumatoid arthritis;Arterial occlusive disease;Coronary atherosclerosis;Thrombosis
T53585	HMGCR	Successful target	D0NJ5U	PMID8246233C35	Investigative	Blood/blood-forming organ sympton;Cardiovascular disease;Dyslipidemia;Hepatitis virus infection;Hyper-lipoproteinaemia;Multiple myeloma;Multiple sclerosis;Myocardial infarction;Pain;Rheumatoid arthritis;Arterial occlusive disease;Coronary atherosclerosis;Thrombosis
T53585	HMGCR	Successful target	D0NU6K	(Z)-5-octadecen-7,9-diynoic acid	Investigative	Blood/blood-forming organ sympton;Cardiovascular disease;Dyslipidemia;Hepatitis virus infection;Hyper-lipoproteinaemia;Multiple myeloma;Multiple sclerosis;Myocardial infarction;Pain;Rheumatoid arthritis;Arterial occlusive disease;Coronary atherosclerosis;Thrombosis
T53585	HMGCR	Successful target	D0O0OD	Sterol derivative 3	Patented	Blood/blood-forming organ sympton;Cardiovascular disease;Dyslipidemia;Hepatitis virus infection;Hyper-lipoproteinaemia;Multiple myeloma;Multiple sclerosis;Myocardial infarction;Pain;Rheumatoid arthritis;Arterial occlusive disease;Coronary atherosclerosis;Thrombosis
T53585	HMGCR	Successful target	D0O1OC	PMID2296036C2g	Investigative	Blood/blood-forming organ sympton;Cardiovascular disease;Dyslipidemia;Hepatitis virus infection;Hyper-lipoproteinaemia;Multiple myeloma;Multiple sclerosis;Myocardial infarction;Pain;Rheumatoid arthritis;Arterial occlusive disease;Coronary atherosclerosis;Thrombosis
T53585	HMGCR	Successful target	D0O2FD	PMID1656041C11ff	Investigative	Blood/blood-forming organ sympton;Cardiovascular disease;Dyslipidemia;Hepatitis virus infection;Hyper-lipoproteinaemia;Multiple myeloma;Multiple sclerosis;Myocardial infarction;Pain;Rheumatoid arthritis;Arterial occlusive disease;Coronary atherosclerosis;Thrombosis
T53585	HMGCR	Successful target	D0O7AS	PMID18155906C16f	Investigative	Blood/blood-forming organ sympton;Cardiovascular disease;Dyslipidemia;Hepatitis virus infection;Hyper-lipoproteinaemia;Multiple myeloma;Multiple sclerosis;Myocardial infarction;Pain;Rheumatoid arthritis;Arterial occlusive disease;Coronary atherosclerosis;Thrombosis
T53585	HMGCR	Successful target	D0O8XW	PMID17560788C29f	Investigative	Blood/blood-forming organ sympton;Cardiovascular disease;Dyslipidemia;Hepatitis virus infection;Hyper-lipoproteinaemia;Multiple myeloma;Multiple sclerosis;Myocardial infarction;Pain;Rheumatoid arthritis;Arterial occlusive disease;Coronary atherosclerosis;Thrombosis
T53585	HMGCR	Successful target	D0Q2EH	Brutieridin	Investigative	Blood/blood-forming organ sympton;Cardiovascular disease;Dyslipidemia;Hepatitis virus infection;Hyper-lipoproteinaemia;Multiple myeloma;Multiple sclerosis;Myocardial infarction;Pain;Rheumatoid arthritis;Arterial occlusive disease;Coronary atherosclerosis;Thrombosis
T53585	HMGCR	Successful target	D0Q6WP	PMID15686906C29	Investigative	Blood/blood-forming organ sympton;Cardiovascular disease;Dyslipidemia;Hepatitis virus infection;Hyper-lipoproteinaemia;Multiple myeloma;Multiple sclerosis;Myocardial infarction;Pain;Rheumatoid arthritis;Arterial occlusive disease;Coronary atherosclerosis;Thrombosis
T53585	HMGCR	Successful target	D0QW7F	Quinoline derivative 16	Patented	Blood/blood-forming organ sympton;Cardiovascular disease;Dyslipidemia;Hepatitis virus infection;Hyper-lipoproteinaemia;Multiple myeloma;Multiple sclerosis;Myocardial infarction;Pain;Rheumatoid arthritis;Arterial occlusive disease;Coronary atherosclerosis;Thrombosis
T53585	HMGCR	Successful target	D0R1FP	PMID2153213C1a	Investigative	Blood/blood-forming organ sympton;Cardiovascular disease;Dyslipidemia;Hepatitis virus infection;Hyper-lipoproteinaemia;Multiple myeloma;Multiple sclerosis;Myocardial infarction;Pain;Rheumatoid arthritis;Arterial occlusive disease;Coronary atherosclerosis;Thrombosis
T53585	HMGCR	Successful target	D0R6JE	Nicotinamide-Adenine-Dinucleotide	Investigative	Blood/blood-forming organ sympton;Cardiovascular disease;Dyslipidemia;Hepatitis virus infection;Hyper-lipoproteinaemia;Multiple myeloma;Multiple sclerosis;Myocardial infarction;Pain;Rheumatoid arthritis;Arterial occlusive disease;Coronary atherosclerosis;Thrombosis
T53585	HMGCR	Successful target	D0R8YV	PMID1656041C74	Investigative	Blood/blood-forming organ sympton;Cardiovascular disease;Dyslipidemia;Hepatitis virus infection;Hyper-lipoproteinaemia;Multiple myeloma;Multiple sclerosis;Myocardial infarction;Pain;Rheumatoid arthritis;Arterial occlusive disease;Coronary atherosclerosis;Thrombosis
T53585	HMGCR	Successful target	D0RA8F	PMID2153213C1f	Investigative	Blood/blood-forming organ sympton;Cardiovascular disease;Dyslipidemia;Hepatitis virus infection;Hyper-lipoproteinaemia;Multiple myeloma;Multiple sclerosis;Myocardial infarction;Pain;Rheumatoid arthritis;Arterial occlusive disease;Coronary atherosclerosis;Thrombosis
T53585	HMGCR	Successful target	D0RW8J	Poly-substituted azoles statin lactone derivative 1	Patented	Blood/blood-forming organ sympton;Cardiovascular disease;Dyslipidemia;Hepatitis virus infection;Hyper-lipoproteinaemia;Multiple myeloma;Multiple sclerosis;Myocardial infarction;Pain;Rheumatoid arthritis;Arterial occlusive disease;Coronary atherosclerosis;Thrombosis
T53585	HMGCR	Successful target	D0S1ER	PMID8246233C28	Investigative	Blood/blood-forming organ sympton;Cardiovascular disease;Dyslipidemia;Hepatitis virus infection;Hyper-lipoproteinaemia;Multiple myeloma;Multiple sclerosis;Myocardial infarction;Pain;Rheumatoid arthritis;Arterial occlusive disease;Coronary atherosclerosis;Thrombosis
T53585	HMGCR	Successful target	D0S1LA	GFPTGG	Investigative	Blood/blood-forming organ sympton;Cardiovascular disease;Dyslipidemia;Hepatitis virus infection;Hyper-lipoproteinaemia;Multiple myeloma;Multiple sclerosis;Myocardial infarction;Pain;Rheumatoid arthritis;Arterial occlusive disease;Coronary atherosclerosis;Thrombosis
T53585	HMGCR	Successful target	D0S3BE	PMID27537201-Compound-Figure17	Patented	Blood/blood-forming organ sympton;Cardiovascular disease;Dyslipidemia;Hepatitis virus infection;Hyper-lipoproteinaemia;Multiple myeloma;Multiple sclerosis;Myocardial infarction;Pain;Rheumatoid arthritis;Arterial occlusive disease;Coronary atherosclerosis;Thrombosis
T53585	HMGCR	Successful target	D0SH0L	PMID27537201-Compound-Figure15b	Patented	Blood/blood-forming organ sympton;Cardiovascular disease;Dyslipidemia;Hepatitis virus infection;Hyper-lipoproteinaemia;Multiple myeloma;Multiple sclerosis;Myocardial infarction;Pain;Rheumatoid arthritis;Arterial occlusive disease;Coronary atherosclerosis;Thrombosis
T53585	HMGCR	Successful target	D0T4PL	PMID1656041C11jj	Investigative	Blood/blood-forming organ sympton;Cardiovascular disease;Dyslipidemia;Hepatitis virus infection;Hyper-lipoproteinaemia;Multiple myeloma;Multiple sclerosis;Myocardial infarction;Pain;Rheumatoid arthritis;Arterial occlusive disease;Coronary atherosclerosis;Thrombosis
T53585	HMGCR	Successful target	D0U2CK	Quinoline derivative 1	Patented	Blood/blood-forming organ sympton;Cardiovascular disease;Dyslipidemia;Hepatitis virus infection;Hyper-lipoproteinaemia;Multiple myeloma;Multiple sclerosis;Myocardial infarction;Pain;Rheumatoid arthritis;Arterial occlusive disease;Coronary atherosclerosis;Thrombosis
T53585	HMGCR	Successful target	D0UQ6A	PMID2231594C3q	Investigative	Blood/blood-forming organ sympton;Cardiovascular disease;Dyslipidemia;Hepatitis virus infection;Hyper-lipoproteinaemia;Multiple myeloma;Multiple sclerosis;Myocardial infarction;Pain;Rheumatoid arthritis;Arterial occlusive disease;Coronary atherosclerosis;Thrombosis
T53585	HMGCR	Successful target	D0W3NA	Coenzyme A	Investigative	Blood/blood-forming organ sympton;Cardiovascular disease;Dyslipidemia;Hepatitis virus infection;Hyper-lipoproteinaemia;Multiple myeloma;Multiple sclerosis;Myocardial infarction;Pain;Rheumatoid arthritis;Arterial occlusive disease;Coronary atherosclerosis;Thrombosis
T53585	HMGCR	Successful target	D0W5FM	PMID1527791C29	Investigative	Blood/blood-forming organ sympton;Cardiovascular disease;Dyslipidemia;Hepatitis virus infection;Hyper-lipoproteinaemia;Multiple myeloma;Multiple sclerosis;Myocardial infarction;Pain;Rheumatoid arthritis;Arterial occlusive disease;Coronary atherosclerosis;Thrombosis
T53585	HMGCR	Successful target	D0W7VX	Statin	Investigative	Blood/blood-forming organ sympton;Cardiovascular disease;Dyslipidemia;Hepatitis virus infection;Hyper-lipoproteinaemia;Multiple myeloma;Multiple sclerosis;Myocardial infarction;Pain;Rheumatoid arthritis;Arterial occlusive disease;Coronary atherosclerosis;Thrombosis
T53585	HMGCR	Successful target	D0WL5V	LAROPIPRANT	Phase 4	Blood/blood-forming organ sympton;Cardiovascular disease;Dyslipidemia;Hepatitis virus infection;Hyper-lipoproteinaemia;Multiple myeloma;Multiple sclerosis;Myocardial infarction;Pain;Rheumatoid arthritis;Arterial occlusive disease;Coronary atherosclerosis;Thrombosis
T53585	HMGCR	Successful target	D0X0GG	PMID1656041C4rr	Investigative	Blood/blood-forming organ sympton;Cardiovascular disease;Dyslipidemia;Hepatitis virus infection;Hyper-lipoproteinaemia;Multiple myeloma;Multiple sclerosis;Myocardial infarction;Pain;Rheumatoid arthritis;Arterial occlusive disease;Coronary atherosclerosis;Thrombosis
T53585	HMGCR	Successful target	D0X0GV	GLPDGG peptide	Investigative	Blood/blood-forming organ sympton;Cardiovascular disease;Dyslipidemia;Hepatitis virus infection;Hyper-lipoproteinaemia;Multiple myeloma;Multiple sclerosis;Myocardial infarction;Pain;Rheumatoid arthritis;Arterial occlusive disease;Coronary atherosclerosis;Thrombosis
T53585	HMGCR	Successful target	D0X1VL	F(4-Fluoro)VAE	Investigative	Blood/blood-forming organ sympton;Cardiovascular disease;Dyslipidemia;Hepatitis virus infection;Hyper-lipoproteinaemia;Multiple myeloma;Multiple sclerosis;Myocardial infarction;Pain;Rheumatoid arthritis;Arterial occlusive disease;Coronary atherosclerosis;Thrombosis
T53585	HMGCR	Successful target	D0Y6DJ	rawsonol	Investigative	Blood/blood-forming organ sympton;Cardiovascular disease;Dyslipidemia;Hepatitis virus infection;Hyper-lipoproteinaemia;Multiple myeloma;Multiple sclerosis;Myocardial infarction;Pain;Rheumatoid arthritis;Arterial occlusive disease;Coronary atherosclerosis;Thrombosis
T53585	HMGCR	Successful target	D0YX0O	PMID27537201-Compound-Figure11	Patented	Blood/blood-forming organ sympton;Cardiovascular disease;Dyslipidemia;Hepatitis virus infection;Hyper-lipoproteinaemia;Multiple myeloma;Multiple sclerosis;Myocardial infarction;Pain;Rheumatoid arthritis;Arterial occlusive disease;Coronary atherosclerosis;Thrombosis
T53585	HMGCR	Successful target	D0YZ3U	Sterol derivative 2	Patented	Blood/blood-forming organ sympton;Cardiovascular disease;Dyslipidemia;Hepatitis virus infection;Hyper-lipoproteinaemia;Multiple myeloma;Multiple sclerosis;Myocardial infarction;Pain;Rheumatoid arthritis;Arterial occlusive disease;Coronary atherosclerosis;Thrombosis
T53585	HMGCR	Successful target	D0ZQ3B	PMID2296027C29	Investigative	Blood/blood-forming organ sympton;Cardiovascular disease;Dyslipidemia;Hepatitis virus infection;Hyper-lipoproteinaemia;Multiple myeloma;Multiple sclerosis;Myocardial infarction;Pain;Rheumatoid arthritis;Arterial occlusive disease;Coronary atherosclerosis;Thrombosis
T55260	PPM1A	Clinical trial target	D01HZQ	VP-102	Phase 3	Common warts;Molluscum contagiosum
T55781	MERTK	Clinical trial target	D00DRL	MK-2461	Phase 1/2	Acute myeloid leukaemia;Alzheimer disease;Myelodysplastic syndrome;Solid tumour/cancer;Brain cancer;Mature B-cell lymphoma
T55781	MERTK	Clinical trial target	D09TFN	LDC1267	Investigative	Acute myeloid leukaemia;Alzheimer disease;Myelodysplastic syndrome;Solid tumour/cancer;Brain cancer;Mature B-cell lymphoma
T55781	MERTK	Clinical trial target	D0N3XP	G749	Investigative	Acute myeloid leukaemia;Alzheimer disease;Myelodysplastic syndrome;Solid tumour/cancer;Brain cancer;Mature B-cell lymphoma
T55781	MERTK	Clinical trial target	D0VH4T	ONO-7475	Phase 1	Acute myeloid leukaemia;Alzheimer disease;Myelodysplastic syndrome;Solid tumour/cancer;Brain cancer;Mature B-cell lymphoma
T55781	MERTK	Clinical trial target	D10LNV	MRX-2843	Phase 1	Acute myeloid leukaemia;Alzheimer disease;Myelodysplastic syndrome;Solid tumour/cancer;Brain cancer;Mature B-cell lymphoma
T55781	MERTK	Clinical trial target	D7HZ3T	RXDX-106	Phase 1	Acute myeloid leukaemia;Alzheimer disease;Myelodysplastic syndrome;Solid tumour/cancer;Brain cancer;Mature B-cell lymphoma
T55781	MERTK	Clinical trial target	DA1MG8	ONO-7475	Phase 1/2	Acute myeloid leukaemia;Alzheimer disease;Myelodysplastic syndrome;Solid tumour/cancer;Brain cancer;Mature B-cell lymphoma
T55781	MERTK	Clinical trial target	DCJX65	UNC2025	Investigative	Acute myeloid leukaemia;Alzheimer disease;Myelodysplastic syndrome;Solid tumour/cancer;Brain cancer;Mature B-cell lymphoma
T55781	MERTK	Clinical trial target	DI81LW	UNC569	Investigative	Acute myeloid leukaemia;Alzheimer disease;Myelodysplastic syndrome;Solid tumour/cancer;Brain cancer;Mature B-cell lymphoma
T55781	MERTK	Clinical trial target	DP4KH3	PF-07265807	Phase 1	Acute myeloid leukaemia;Alzheimer disease;Myelodysplastic syndrome;Solid tumour/cancer;Brain cancer;Mature B-cell lymphoma
T55781	MERTK	Clinical trial target	DQX83Z	INCB81776	Phase 1	Acute myeloid leukaemia;Alzheimer disease;Myelodysplastic syndrome;Solid tumour/cancer;Brain cancer;Mature B-cell lymphoma
T56545	APOA1	Clinical trial target	D03AKH	CER-001	Phase 2	Arterial occlusive disease;Cardiovascular disease;Myocardial infarction;Aortic valve stenosis;Hyper-lipoproteinaemia;Lipidaemia
T56545	APOA1	Clinical trial target	D04PPK	CER-522	Phase 1	Arterial occlusive disease;Cardiovascular disease;Myocardial infarction;Aortic valve stenosis;Hyper-lipoproteinaemia;Lipidaemia
T56545	APOA1	Clinical trial target	D0L1ZK	MDCO-216	Phase 1	Arterial occlusive disease;Cardiovascular disease;Myocardial infarction;Aortic valve stenosis;Hyper-lipoproteinaemia;Lipidaemia
T56545	APOA1	Clinical trial target	D0L8VA	CSL-112	Phase 2	Arterial occlusive disease;Cardiovascular disease;Myocardial infarction;Aortic valve stenosis;Hyper-lipoproteinaemia;Lipidaemia
T57700	KIT	Successful target	D00NSD	XL-820	Phase 2	Alzheimer disease;Bone/articular cartilage neoplasm;Brain cancer;Colorectal cancer;Gastrointestinal stromal tumour;Inflammatory arthropathy;Liver cancer;Lung cancer;Malignant intestine neoplasm;Mastocytosis;Mature B-cell lymphoma;Multiple myeloma;Myelodysplastic syndrome;Myeloproliferative neoplasm;Phakomatoses/hamartoneoplastic syndrome;Renal cell carcinoma;Solid tumour/cancer;Thrombocytopenia;A…
T57700	KIT	Successful target	D01PZD	Romiplostim	Approved	Alzheimer disease;Bone/articular cartilage neoplasm;Brain cancer;Colorectal cancer;Gastrointestinal stromal tumour;Inflammatory arthropathy;Liver cancer;Lung cancer;Malignant intestine neoplasm;Mastocytosis;Mature B-cell lymphoma;Multiple myeloma;Myelodysplastic syndrome;Myeloproliferative neoplasm;Phakomatoses/hamartoneoplastic syndrome;Renal cell carcinoma;Solid tumour/cancer;Thrombocytopenia;A…
T57700	KIT	Successful target	D03MDY	PLX9486	Phase 1/2	Alzheimer disease;Bone/articular cartilage neoplasm;Brain cancer;Colorectal cancer;Gastrointestinal stromal tumour;Inflammatory arthropathy;Liver cancer;Lung cancer;Malignant intestine neoplasm;Mastocytosis;Mature B-cell lymphoma;Multiple myeloma;Myelodysplastic syndrome;Myeloproliferative neoplasm;Phakomatoses/hamartoneoplastic syndrome;Renal cell carcinoma;Solid tumour/cancer;Thrombocytopenia;A…
T57700	KIT	Successful target	D03SGF	WBZ-7	Investigative	Alzheimer disease;Bone/articular cartilage neoplasm;Brain cancer;Colorectal cancer;Gastrointestinal stromal tumour;Inflammatory arthropathy;Liver cancer;Lung cancer;Malignant intestine neoplasm;Mastocytosis;Mature B-cell lymphoma;Multiple myeloma;Myelodysplastic syndrome;Myeloproliferative neoplasm;Phakomatoses/hamartoneoplastic syndrome;Renal cell carcinoma;Solid tumour/cancer;Thrombocytopenia;A…
T57700	KIT	Successful target	D05CFQ	AMG-191	Phase 1	Alzheimer disease;Bone/articular cartilage neoplasm;Brain cancer;Colorectal cancer;Gastrointestinal stromal tumour;Inflammatory arthropathy;Liver cancer;Lung cancer;Malignant intestine neoplasm;Mastocytosis;Mature B-cell lymphoma;Multiple myeloma;Myelodysplastic syndrome;Myeloproliferative neoplasm;Phakomatoses/hamartoneoplastic syndrome;Renal cell carcinoma;Solid tumour/cancer;Thrombocytopenia;A…
T57700	KIT	Successful target	D05FFB	5,11-Dimethyl-6H-pyrido[4,3-b]carbazol-9-ol	Investigative	Alzheimer disease;Bone/articular cartilage neoplasm;Brain cancer;Colorectal cancer;Gastrointestinal stromal tumour;Inflammatory arthropathy;Liver cancer;Lung cancer;Malignant intestine neoplasm;Mastocytosis;Mature B-cell lymphoma;Multiple myeloma;Myelodysplastic syndrome;Myeloproliferative neoplasm;Phakomatoses/hamartoneoplastic syndrome;Renal cell carcinoma;Solid tumour/cancer;Thrombocytopenia;A…
T57700	KIT	Successful target	D05QBZ	CP-673451	Investigative	Alzheimer disease;Bone/articular cartilage neoplasm;Brain cancer;Colorectal cancer;Gastrointestinal stromal tumour;Inflammatory arthropathy;Liver cancer;Lung cancer;Malignant intestine neoplasm;Mastocytosis;Mature B-cell lymphoma;Multiple myeloma;Myelodysplastic syndrome;Myeloproliferative neoplasm;Phakomatoses/hamartoneoplastic syndrome;Renal cell carcinoma;Solid tumour/cancer;Thrombocytopenia;A…
T57700	KIT	Successful target	D08BJR	Ki-20227	Investigative	Alzheimer disease;Bone/articular cartilage neoplasm;Brain cancer;Colorectal cancer;Gastrointestinal stromal tumour;Inflammatory arthropathy;Liver cancer;Lung cancer;Malignant intestine neoplasm;Mastocytosis;Mature B-cell lymphoma;Multiple myeloma;Myelodysplastic syndrome;Myeloproliferative neoplasm;Phakomatoses/hamartoneoplastic syndrome;Renal cell carcinoma;Solid tumour/cancer;Thrombocytopenia;A…
T57700	KIT	Successful target	D08ZWJ	9-Bromo-5,11-dimethyl-6H-pyrido[4,3-b]carbazole	Investigative	Alzheimer disease;Bone/articular cartilage neoplasm;Brain cancer;Colorectal cancer;Gastrointestinal stromal tumour;Inflammatory arthropathy;Liver cancer;Lung cancer;Malignant intestine neoplasm;Mastocytosis;Mature B-cell lymphoma;Multiple myeloma;Myelodysplastic syndrome;Myeloproliferative neoplasm;Phakomatoses/hamartoneoplastic syndrome;Renal cell carcinoma;Solid tumour/cancer;Thrombocytopenia;A…
T57700	KIT	Successful target	D09AAK	Ripretinib	Approved	Alzheimer disease;Bone/articular cartilage neoplasm;Brain cancer;Colorectal cancer;Gastrointestinal stromal tumour;Inflammatory arthropathy;Liver cancer;Lung cancer;Malignant intestine neoplasm;Mastocytosis;Mature B-cell lymphoma;Multiple myeloma;Myelodysplastic syndrome;Myeloproliferative neoplasm;Phakomatoses/hamartoneoplastic syndrome;Renal cell carcinoma;Solid tumour/cancer;Thrombocytopenia;A…
T57700	KIT	Successful target	D09GDD	Regorafenib	Approved	Alzheimer disease;Bone/articular cartilage neoplasm;Brain cancer;Colorectal cancer;Gastrointestinal stromal tumour;Inflammatory arthropathy;Liver cancer;Lung cancer;Malignant intestine neoplasm;Mastocytosis;Mature B-cell lymphoma;Multiple myeloma;Myelodysplastic syndrome;Myeloproliferative neoplasm;Phakomatoses/hamartoneoplastic syndrome;Renal cell carcinoma;Solid tumour/cancer;Thrombocytopenia;A…
T57700	KIT	Successful target	D09TAB	Pexidartinib	Approved	Alzheimer disease;Bone/articular cartilage neoplasm;Brain cancer;Colorectal cancer;Gastrointestinal stromal tumour;Inflammatory arthropathy;Liver cancer;Lung cancer;Malignant intestine neoplasm;Mastocytosis;Mature B-cell lymphoma;Multiple myeloma;Myelodysplastic syndrome;Myeloproliferative neoplasm;Phakomatoses/hamartoneoplastic syndrome;Renal cell carcinoma;Solid tumour/cancer;Thrombocytopenia;A…
T57700	KIT	Successful target	D0AK1F	Pyridine derivative 18	Patented	Alzheimer disease;Bone/articular cartilage neoplasm;Brain cancer;Colorectal cancer;Gastrointestinal stromal tumour;Inflammatory arthropathy;Liver cancer;Lung cancer;Malignant intestine neoplasm;Mastocytosis;Mature B-cell lymphoma;Multiple myeloma;Myelodysplastic syndrome;Myeloproliferative neoplasm;Phakomatoses/hamartoneoplastic syndrome;Renal cell carcinoma;Solid tumour/cancer;Thrombocytopenia;A…
T57700	KIT	Successful target	D0AZ3C	Imatinib	Approved	Alzheimer disease;Bone/articular cartilage neoplasm;Brain cancer;Colorectal cancer;Gastrointestinal stromal tumour;Inflammatory arthropathy;Liver cancer;Lung cancer;Malignant intestine neoplasm;Mastocytosis;Mature B-cell lymphoma;Multiple myeloma;Myelodysplastic syndrome;Myeloproliferative neoplasm;Phakomatoses/hamartoneoplastic syndrome;Renal cell carcinoma;Solid tumour/cancer;Thrombocytopenia;A…
T57700	KIT	Successful target	D0BL0O	PMID23521020C7k	Investigative	Alzheimer disease;Bone/articular cartilage neoplasm;Brain cancer;Colorectal cancer;Gastrointestinal stromal tumour;Inflammatory arthropathy;Liver cancer;Lung cancer;Malignant intestine neoplasm;Mastocytosis;Mature B-cell lymphoma;Multiple myeloma;Myelodysplastic syndrome;Myeloproliferative neoplasm;Phakomatoses/hamartoneoplastic syndrome;Renal cell carcinoma;Solid tumour/cancer;Thrombocytopenia;A…
T57700	KIT	Successful target	D0C2GE	PMID22765894C8h	Investigative	Alzheimer disease;Bone/articular cartilage neoplasm;Brain cancer;Colorectal cancer;Gastrointestinal stromal tumour;Inflammatory arthropathy;Liver cancer;Lung cancer;Malignant intestine neoplasm;Mastocytosis;Mature B-cell lymphoma;Multiple myeloma;Myelodysplastic syndrome;Myeloproliferative neoplasm;Phakomatoses/hamartoneoplastic syndrome;Renal cell carcinoma;Solid tumour/cancer;Thrombocytopenia;A…
T57700	KIT	Successful target	D0D3FB	PMID25656651-Compound-21a	Patented	Alzheimer disease;Bone/articular cartilage neoplasm;Brain cancer;Colorectal cancer;Gastrointestinal stromal tumour;Inflammatory arthropathy;Liver cancer;Lung cancer;Malignant intestine neoplasm;Mastocytosis;Mature B-cell lymphoma;Multiple myeloma;Myelodysplastic syndrome;Myeloproliferative neoplasm;Phakomatoses/hamartoneoplastic syndrome;Renal cell carcinoma;Solid tumour/cancer;Thrombocytopenia;A…
T57700	KIT	Successful target	D0E0SH	CART-117 cells	Phase 1	Alzheimer disease;Bone/articular cartilage neoplasm;Brain cancer;Colorectal cancer;Gastrointestinal stromal tumour;Inflammatory arthropathy;Liver cancer;Lung cancer;Malignant intestine neoplasm;Mastocytosis;Mature B-cell lymphoma;Multiple myeloma;Myelodysplastic syndrome;Myeloproliferative neoplasm;Phakomatoses/hamartoneoplastic syndrome;Renal cell carcinoma;Solid tumour/cancer;Thrombocytopenia;A…
T57700	KIT	Successful target	D0F0ZY	Pazopanib HCl	Approved	Alzheimer disease;Bone/articular cartilage neoplasm;Brain cancer;Colorectal cancer;Gastrointestinal stromal tumour;Inflammatory arthropathy;Liver cancer;Lung cancer;Malignant intestine neoplasm;Mastocytosis;Mature B-cell lymphoma;Multiple myeloma;Myelodysplastic syndrome;Myeloproliferative neoplasm;Phakomatoses/hamartoneoplastic syndrome;Renal cell carcinoma;Solid tumour/cancer;Thrombocytopenia;A…
T57700	KIT	Successful target	D0GW4Q	PD-0173956	Investigative	Alzheimer disease;Bone/articular cartilage neoplasm;Brain cancer;Colorectal cancer;Gastrointestinal stromal tumour;Inflammatory arthropathy;Liver cancer;Lung cancer;Malignant intestine neoplasm;Mastocytosis;Mature B-cell lymphoma;Multiple myeloma;Myelodysplastic syndrome;Myeloproliferative neoplasm;Phakomatoses/hamartoneoplastic syndrome;Renal cell carcinoma;Solid tumour/cancer;Thrombocytopenia;A…
T57700	KIT	Successful target	D0H0EQ	Ponatinib	Approved	Alzheimer disease;Bone/articular cartilage neoplasm;Brain cancer;Colorectal cancer;Gastrointestinal stromal tumour;Inflammatory arthropathy;Liver cancer;Lung cancer;Malignant intestine neoplasm;Mastocytosis;Mature B-cell lymphoma;Multiple myeloma;Myelodysplastic syndrome;Myeloproliferative neoplasm;Phakomatoses/hamartoneoplastic syndrome;Renal cell carcinoma;Solid tumour/cancer;Thrombocytopenia;A…
T57700	KIT	Successful target	D0I3XZ	Bis-(5-hydroxy-1H-indol-2-yl)-methanone	Investigative	Alzheimer disease;Bone/articular cartilage neoplasm;Brain cancer;Colorectal cancer;Gastrointestinal stromal tumour;Inflammatory arthropathy;Liver cancer;Lung cancer;Malignant intestine neoplasm;Mastocytosis;Mature B-cell lymphoma;Multiple myeloma;Myelodysplastic syndrome;Myeloproliferative neoplasm;Phakomatoses/hamartoneoplastic syndrome;Renal cell carcinoma;Solid tumour/cancer;Thrombocytopenia;A…
T57700	KIT	Successful target	D0N7AJ	AST-487	Investigative	Alzheimer disease;Bone/articular cartilage neoplasm;Brain cancer;Colorectal cancer;Gastrointestinal stromal tumour;Inflammatory arthropathy;Liver cancer;Lung cancer;Malignant intestine neoplasm;Mastocytosis;Mature B-cell lymphoma;Multiple myeloma;Myelodysplastic syndrome;Myeloproliferative neoplasm;Phakomatoses/hamartoneoplastic syndrome;Renal cell carcinoma;Solid tumour/cancer;Thrombocytopenia;A…
T57700	KIT	Successful target	D0N8RV	OSI-930	Phase 1	Alzheimer disease;Bone/articular cartilage neoplasm;Brain cancer;Colorectal cancer;Gastrointestinal stromal tumour;Inflammatory arthropathy;Liver cancer;Lung cancer;Malignant intestine neoplasm;Mastocytosis;Mature B-cell lymphoma;Multiple myeloma;Myelodysplastic syndrome;Myeloproliferative neoplasm;Phakomatoses/hamartoneoplastic syndrome;Renal cell carcinoma;Solid tumour/cancer;Thrombocytopenia;A…
T57700	KIT	Successful target	D0NB1V	Pyridine derivative 20	Patented	Alzheimer disease;Bone/articular cartilage neoplasm;Brain cancer;Colorectal cancer;Gastrointestinal stromal tumour;Inflammatory arthropathy;Liver cancer;Lung cancer;Malignant intestine neoplasm;Mastocytosis;Mature B-cell lymphoma;Multiple myeloma;Myelodysplastic syndrome;Myeloproliferative neoplasm;Phakomatoses/hamartoneoplastic syndrome;Renal cell carcinoma;Solid tumour/cancer;Thrombocytopenia;A…
T57700	KIT	Successful target	D0O0AW	Pyridine derivative 21	Patented	Alzheimer disease;Bone/articular cartilage neoplasm;Brain cancer;Colorectal cancer;Gastrointestinal stromal tumour;Inflammatory arthropathy;Liver cancer;Lung cancer;Malignant intestine neoplasm;Mastocytosis;Mature B-cell lymphoma;Multiple myeloma;Myelodysplastic syndrome;Myeloproliferative neoplasm;Phakomatoses/hamartoneoplastic syndrome;Renal cell carcinoma;Solid tumour/cancer;Thrombocytopenia;A…
T57700	KIT	Successful target	D0O4TA	Pyridine derivative 22	Patented	Alzheimer disease;Bone/articular cartilage neoplasm;Brain cancer;Colorectal cancer;Gastrointestinal stromal tumour;Inflammatory arthropathy;Liver cancer;Lung cancer;Malignant intestine neoplasm;Mastocytosis;Mature B-cell lymphoma;Multiple myeloma;Myelodysplastic syndrome;Myeloproliferative neoplasm;Phakomatoses/hamartoneoplastic syndrome;Renal cell carcinoma;Solid tumour/cancer;Thrombocytopenia;A…
T57700	KIT	Successful target	D0P3JW	PD-0166326	Investigative	Alzheimer disease;Bone/articular cartilage neoplasm;Brain cancer;Colorectal cancer;Gastrointestinal stromal tumour;Inflammatory arthropathy;Liver cancer;Lung cancer;Malignant intestine neoplasm;Mastocytosis;Mature B-cell lymphoma;Multiple myeloma;Myelodysplastic syndrome;Myeloproliferative neoplasm;Phakomatoses/hamartoneoplastic syndrome;Renal cell carcinoma;Solid tumour/cancer;Thrombocytopenia;A…
T57700	KIT	Successful target	D0T1GF	MP470	Phase 2	Alzheimer disease;Bone/articular cartilage neoplasm;Brain cancer;Colorectal cancer;Gastrointestinal stromal tumour;Inflammatory arthropathy;Liver cancer;Lung cancer;Malignant intestine neoplasm;Mastocytosis;Mature B-cell lymphoma;Multiple myeloma;Myelodysplastic syndrome;Myeloproliferative neoplasm;Phakomatoses/hamartoneoplastic syndrome;Renal cell carcinoma;Solid tumour/cancer;Thrombocytopenia;A…
T57700	KIT	Successful target	D0T2UB	APCK-110	Investigative	Alzheimer disease;Bone/articular cartilage neoplasm;Brain cancer;Colorectal cancer;Gastrointestinal stromal tumour;Inflammatory arthropathy;Liver cancer;Lung cancer;Malignant intestine neoplasm;Mastocytosis;Mature B-cell lymphoma;Multiple myeloma;Myelodysplastic syndrome;Myeloproliferative neoplasm;Phakomatoses/hamartoneoplastic syndrome;Renal cell carcinoma;Solid tumour/cancer;Thrombocytopenia;A…
T57700	KIT	Successful target	D0T4SL	9-Methoxy-5,11-dimethyl-6H-pyrido[4,3-b]carbazole	Investigative	Alzheimer disease;Bone/articular cartilage neoplasm;Brain cancer;Colorectal cancer;Gastrointestinal stromal tumour;Inflammatory arthropathy;Liver cancer;Lung cancer;Malignant intestine neoplasm;Mastocytosis;Mature B-cell lymphoma;Multiple myeloma;Myelodysplastic syndrome;Myeloproliferative neoplasm;Phakomatoses/hamartoneoplastic syndrome;Renal cell carcinoma;Solid tumour/cancer;Thrombocytopenia;A…
T57700	KIT	Successful target	D0T5OS	Phosphonotyrosine	Investigative	Alzheimer disease;Bone/articular cartilage neoplasm;Brain cancer;Colorectal cancer;Gastrointestinal stromal tumour;Inflammatory arthropathy;Liver cancer;Lung cancer;Malignant intestine neoplasm;Mastocytosis;Mature B-cell lymphoma;Multiple myeloma;Myelodysplastic syndrome;Myeloproliferative neoplasm;Phakomatoses/hamartoneoplastic syndrome;Renal cell carcinoma;Solid tumour/cancer;Thrombocytopenia;A…
T57700	KIT	Successful target	D0T7BE	Pyridine derivative 19	Patented	Alzheimer disease;Bone/articular cartilage neoplasm;Brain cancer;Colorectal cancer;Gastrointestinal stromal tumour;Inflammatory arthropathy;Liver cancer;Lung cancer;Malignant intestine neoplasm;Mastocytosis;Mature B-cell lymphoma;Multiple myeloma;Myelodysplastic syndrome;Myeloproliferative neoplasm;Phakomatoses/hamartoneoplastic syndrome;Renal cell carcinoma;Solid tumour/cancer;Thrombocytopenia;A…
T57700	KIT	Successful target	D0TS2B	CAR-T cells targeting CD117	Preclinical	Alzheimer disease;Bone/articular cartilage neoplasm;Brain cancer;Colorectal cancer;Gastrointestinal stromal tumour;Inflammatory arthropathy;Liver cancer;Lung cancer;Malignant intestine neoplasm;Mastocytosis;Mature B-cell lymphoma;Multiple myeloma;Myelodysplastic syndrome;Myeloproliferative neoplasm;Phakomatoses/hamartoneoplastic syndrome;Renal cell carcinoma;Solid tumour/cancer;Thrombocytopenia;A…
T57700	KIT	Successful target	D0UN9O	GTP-14564	Investigative	Alzheimer disease;Bone/articular cartilage neoplasm;Brain cancer;Colorectal cancer;Gastrointestinal stromal tumour;Inflammatory arthropathy;Liver cancer;Lung cancer;Malignant intestine neoplasm;Mastocytosis;Mature B-cell lymphoma;Multiple myeloma;Myelodysplastic syndrome;Myeloproliferative neoplasm;Phakomatoses/hamartoneoplastic syndrome;Renal cell carcinoma;Solid tumour/cancer;Thrombocytopenia;A…
T57700	KIT	Successful target	D0W5HK	Sorafenib	Approved	Alzheimer disease;Bone/articular cartilage neoplasm;Brain cancer;Colorectal cancer;Gastrointestinal stromal tumour;Inflammatory arthropathy;Liver cancer;Lung cancer;Malignant intestine neoplasm;Mastocytosis;Mature B-cell lymphoma;Multiple myeloma;Myelodysplastic syndrome;Myeloproliferative neoplasm;Phakomatoses/hamartoneoplastic syndrome;Renal cell carcinoma;Solid tumour/cancer;Thrombocytopenia;A…
T57700	KIT	Successful target	D0XQ5F	PMID25656651-Compound-21b	Patented	Alzheimer disease;Bone/articular cartilage neoplasm;Brain cancer;Colorectal cancer;Gastrointestinal stromal tumour;Inflammatory arthropathy;Liver cancer;Lung cancer;Malignant intestine neoplasm;Mastocytosis;Mature B-cell lymphoma;Multiple myeloma;Myelodysplastic syndrome;Myeloproliferative neoplasm;Phakomatoses/hamartoneoplastic syndrome;Renal cell carcinoma;Solid tumour/cancer;Thrombocytopenia;A…
T57700	KIT	Successful target	D0Y4BL	JNJ-28312141	Investigative	Alzheimer disease;Bone/articular cartilage neoplasm;Brain cancer;Colorectal cancer;Gastrointestinal stromal tumour;Inflammatory arthropathy;Liver cancer;Lung cancer;Malignant intestine neoplasm;Mastocytosis;Mature B-cell lymphoma;Multiple myeloma;Myelodysplastic syndrome;Myeloproliferative neoplasm;Phakomatoses/hamartoneoplastic syndrome;Renal cell carcinoma;Solid tumour/cancer;Thrombocytopenia;A…
T57700	KIT	Successful target	D0Y9GK	4-(4-aminophenyl)-1H-indazol-3yl-amine	Investigative	Alzheimer disease;Bone/articular cartilage neoplasm;Brain cancer;Colorectal cancer;Gastrointestinal stromal tumour;Inflammatory arthropathy;Liver cancer;Lung cancer;Malignant intestine neoplasm;Mastocytosis;Mature B-cell lymphoma;Multiple myeloma;Myelodysplastic syndrome;Myeloproliferative neoplasm;Phakomatoses/hamartoneoplastic syndrome;Renal cell carcinoma;Solid tumour/cancer;Thrombocytopenia;A…
T57700	KIT	Successful target	D0Z6MT	Famitinib	Phase 2	Alzheimer disease;Bone/articular cartilage neoplasm;Brain cancer;Colorectal cancer;Gastrointestinal stromal tumour;Inflammatory arthropathy;Liver cancer;Lung cancer;Malignant intestine neoplasm;Mastocytosis;Mature B-cell lymphoma;Multiple myeloma;Myelodysplastic syndrome;Myeloproliferative neoplasm;Phakomatoses/hamartoneoplastic syndrome;Renal cell carcinoma;Solid tumour/cancer;Thrombocytopenia;A…
T58454	FGFR2	Successful target	D00DRL	MK-2461	Phase 1/2	Bladder cancer;Hepatitis virus infection;Liver cancer;Myeloproliferative neoplasm;Oral mucositis;Periodontal disease;Solid tumour/cancer;Breast cancer;Alzheimer disease;Stomach cancer;Retina cancer
T58454	FGFR2	Successful target	D02VPS	Anti-FGFR2 humanized mab	Investigative	Bladder cancer;Hepatitis virus infection;Liver cancer;Myeloproliferative neoplasm;Oral mucositis;Periodontal disease;Solid tumour/cancer;Breast cancer;Alzheimer disease;Stomach cancer;Retina cancer
T58454	FGFR2	Successful target	D02WVT	E-3810	Phase 3	Bladder cancer;Hepatitis virus infection;Liver cancer;Myeloproliferative neoplasm;Oral mucositis;Periodontal disease;Solid tumour/cancer;Breast cancer;Alzheimer disease;Stomach cancer;Retina cancer
T58454	FGFR2	Successful target	D09PMV	Interferon Alfa-2a, Recombinant	Approved	Bladder cancer;Hepatitis virus infection;Liver cancer;Myeloproliferative neoplasm;Oral mucositis;Periodontal disease;Solid tumour/cancer;Breast cancer;Alzheimer disease;Stomach cancer;Retina cancer
T58454	FGFR2	Successful target	D09XIL	Ro-4396686	Investigative	Bladder cancer;Hepatitis virus infection;Liver cancer;Myeloproliferative neoplasm;Oral mucositis;Periodontal disease;Solid tumour/cancer;Breast cancer;Alzheimer disease;Stomach cancer;Retina cancer
T58454	FGFR2	Successful target	D0D4VV	LY2874455	Phase 2	Bladder cancer;Hepatitis virus infection;Liver cancer;Myeloproliferative neoplasm;Oral mucositis;Periodontal disease;Solid tumour/cancer;Breast cancer;Alzheimer disease;Stomach cancer;Retina cancer
T58454	FGFR2	Successful target	D0G2QH	AEE-788	Phase 1/2	Bladder cancer;Hepatitis virus infection;Liver cancer;Myeloproliferative neoplasm;Oral mucositis;Periodontal disease;Solid tumour/cancer;Breast cancer;Alzheimer disease;Stomach cancer;Retina cancer
T58454	FGFR2	Successful target	D0H1OK	TG-100435	Investigative	Bladder cancer;Hepatitis virus infection;Liver cancer;Myeloproliferative neoplasm;Oral mucositis;Periodontal disease;Solid tumour/cancer;Breast cancer;Alzheimer disease;Stomach cancer;Retina cancer
T58454	FGFR2	Successful target	D0IE6Z	Platelet factor 4 (PF-4)	Investigative	Bladder cancer;Hepatitis virus infection;Liver cancer;Myeloproliferative neoplasm;Oral mucositis;Periodontal disease;Solid tumour/cancer;Breast cancer;Alzheimer disease;Stomach cancer;Retina cancer
T58454	FGFR2	Successful target	D0KV1Q	Trafermin	Phase 3	Bladder cancer;Hepatitis virus infection;Liver cancer;Myeloproliferative neoplasm;Oral mucositis;Periodontal disease;Solid tumour/cancer;Breast cancer;Alzheimer disease;Stomach cancer;Retina cancer
T58454	FGFR2	Successful target	D0L6RF	BAY1179470	Phase 1	Bladder cancer;Hepatitis virus infection;Liver cancer;Myeloproliferative neoplasm;Oral mucositis;Periodontal disease;Solid tumour/cancer;Breast cancer;Alzheimer disease;Stomach cancer;Retina cancer
T58454	FGFR2	Successful target	D0O6UY	Pemigatinib	Approved	Bladder cancer;Hepatitis virus infection;Liver cancer;Myeloproliferative neoplasm;Oral mucositis;Periodontal disease;Solid tumour/cancer;Breast cancer;Alzheimer disease;Stomach cancer;Retina cancer
T58454	FGFR2	Successful target	D0O7GU	Palifermin	Approved	Bladder cancer;Hepatitis virus infection;Liver cancer;Myeloproliferative neoplasm;Oral mucositis;Periodontal disease;Solid tumour/cancer;Breast cancer;Alzheimer disease;Stomach cancer;Retina cancer
T58454	FGFR2	Successful target	D0R6OM	ACTB-1003	Investigative	Bladder cancer;Hepatitis virus infection;Liver cancer;Myeloproliferative neoplasm;Oral mucositis;Periodontal disease;Solid tumour/cancer;Breast cancer;Alzheimer disease;Stomach cancer;Retina cancer
T58454	FGFR2	Successful target	D0VN4K	PK 11195	Investigative	Bladder cancer;Hepatitis virus infection;Liver cancer;Myeloproliferative neoplasm;Oral mucositis;Periodontal disease;Solid tumour/cancer;Breast cancer;Alzheimer disease;Stomach cancer;Retina cancer
T58454	FGFR2	Successful target	D0XT0W	Debio 1347	Phase 2	Bladder cancer;Hepatitis virus infection;Liver cancer;Myeloproliferative neoplasm;Oral mucositis;Periodontal disease;Solid tumour/cancer;Breast cancer;Alzheimer disease;Stomach cancer;Retina cancer
T58454	FGFR2	Successful target	D47MOS	Alofanib	Phase 1	Bladder cancer;Hepatitis virus infection;Liver cancer;Myeloproliferative neoplasm;Oral mucositis;Periodontal disease;Solid tumour/cancer;Breast cancer;Alzheimer disease;Stomach cancer;Retina cancer
T58454	FGFR2	Successful target	DU1DL0	RLY-4008	Phase 1	Bladder cancer;Hepatitis virus infection;Liver cancer;Myeloproliferative neoplasm;Oral mucositis;Periodontal disease;Solid tumour/cancer;Breast cancer;Alzheimer disease;Stomach cancer;Retina cancer
T58921	PPARG	Successful target	D00ACX	2-chloro-5-nitro-N-phenylbenzamide	Investigative	Acute diabete complication;Alzheimer disease;Obesity;Type 2 diabetes mellitus;Diabetes mellitus;Glaucoma;Inborn lipid metabolism error;Solid tumour/cancer;Gout;Indeterminate colitis;Multiple sclerosis;Nicotine use disorder;Non-alcoholic fatty liver disease;Opioid use disorder;Hyper-lipoproteinaemia;Idiopathic interstitial pneumonitis;Metabolic disorder
T58921	PPARG	Successful target	D00PJJ	FK-614	Phase 2	Acute diabete complication;Alzheimer disease;Obesity;Type 2 diabetes mellitus;Diabetes mellitus;Glaucoma;Inborn lipid metabolism error;Solid tumour/cancer;Gout;Indeterminate colitis;Multiple sclerosis;Nicotine use disorder;Non-alcoholic fatty liver disease;Opioid use disorder;Hyper-lipoproteinaemia;Idiopathic interstitial pneumonitis;Metabolic disorder
T58921	PPARG	Successful target	D01ARG	DB-900	Investigative	Acute diabete complication;Alzheimer disease;Obesity;Type 2 diabetes mellitus;Diabetes mellitus;Glaucoma;Inborn lipid metabolism error;Solid tumour/cancer;Gout;Indeterminate colitis;Multiple sclerosis;Nicotine use disorder;Non-alcoholic fatty liver disease;Opioid use disorder;Hyper-lipoproteinaemia;Idiopathic interstitial pneumonitis;Metabolic disorder
T58921	PPARG	Successful target	D01PGU	15-deoxy-Delta(12, 14)-prostaglandin J(2)	Investigative	Acute diabete complication;Alzheimer disease;Obesity;Type 2 diabetes mellitus;Diabetes mellitus;Glaucoma;Inborn lipid metabolism error;Solid tumour/cancer;Gout;Indeterminate colitis;Multiple sclerosis;Nicotine use disorder;Non-alcoholic fatty liver disease;Opioid use disorder;Hyper-lipoproteinaemia;Idiopathic interstitial pneumonitis;Metabolic disorder
T58921	PPARG	Successful target	D01POG	GW-2331	Investigative	Acute diabete complication;Alzheimer disease;Obesity;Type 2 diabetes mellitus;Diabetes mellitus;Glaucoma;Inborn lipid metabolism error;Solid tumour/cancer;Gout;Indeterminate colitis;Multiple sclerosis;Nicotine use disorder;Non-alcoholic fatty liver disease;Opioid use disorder;Hyper-lipoproteinaemia;Idiopathic interstitial pneumonitis;Metabolic disorder
T58921	PPARG	Successful target	D02NHD	Ragaglitazar	Phase 3	Acute diabete complication;Alzheimer disease;Obesity;Type 2 diabetes mellitus;Diabetes mellitus;Glaucoma;Inborn lipid metabolism error;Solid tumour/cancer;Gout;Indeterminate colitis;Multiple sclerosis;Nicotine use disorder;Non-alcoholic fatty liver disease;Opioid use disorder;Hyper-lipoproteinaemia;Idiopathic interstitial pneumonitis;Metabolic disorder
[truncated: 848 more rows]
