# Supplementary material for: Implicating genes, pleiotropy, and sexual dimorphism at blood lipid loci through multi-ancestry meta-analysis
Source: Genome Biol. 2022 Dec 27;23:268. doi: 10.1186/s13059-022-02837-1 (PMC9793579; doi:10.1186/s13059-022-02837-1)
Supplement: Supplementary file 8 — Additional file 8: Table S6. Association of lipid index variants with CAD, T2D and NAFLD. [file 13059_2022_2837_MOESM8_ESM.xlsx]

## Sheet: Sheet1
Table S6. Association of lipid index variants with CAD, T2D and NAFLD
rsid_dbSNP150	trait	chr	pos (build 37)	Allele1	Allele2	Lipid_Effect	Lipid_StdErr	pvalue_neg_log10	T2D_Effect	T2D_StdErr	T2D_P-value	CAD_Effect	CAD_StdErr	CAD_P-value	NAFLD_Effect	NAFLD_StdErr	NAFLD_P-value	pp4_lipids_cad	pp4_lipids_t2d
rs6605083	logTG	1	2147162	C	T	-0.0099	0.0015	10.386	-0.023	0.0079	0.0035	-0.0137	0.0045	0.002254	0.0158	0.0275	0.5661	0.282149	0.198919
rs1123571	LDL	1	2326009	G	A	-0.0106	0.0013	15.4528	0.003	0.0067	0.66	0.0004	0.0039	0.9172	0.0041	0.0233	0.8616	2.11079e-08	0.00512284
rs880315	TC	1	10796866	T	C	-0.0099	0.0013	13.5802	-0.003	0.0068	0.66	0.0162	0.0039	3.873e-05	0.0109	0.024	0.6508	0.801292	0.00509035
rs6690758	LDL	1	15914648	A	G	-0.0096	0.0014	11.1533	0.0019	0.0068	0.78	0.0043	0.004	0.2802	-0.0015	0.0249	0.9518	0.000512759	0.00451282
rs6690758	TC	1	15914648	A	G	-0.0089	0.0013	11.12	0.0019	0.0068	0.78	0.0043	0.004	0.2802	-0.0015	0.0249	0.9518	0.00376268	0.0313097
rs12562207	logTG	1	16508059	A	G	-0.0082	0.0013	9.54787	0.0021	0.0066	0.75	-0.0102	0.0039	0.009211	-0.0592	0.0236	0.01208	0.220808	0.00653284
rs36086195	LDL	1	16510894	T	C	-0.0141	0.0013	26.6819	0.0049	0.0065	0.45	-0.015	0.0039	0.00014	-0.065	0.0232	0.005049	0.660201	0.00601908
rs36086195	nonHDL	1	16510894	T	C	-0.0153	0.0015	23.7027	0.0049	0.0065	0.45	-0.015	0.0039	0.00014	-0.065	0.0232	0.005049	0.650938	0.00585546
rs36086195	TC	1	16510894	T	C	-0.0142	0.0012	31.5809	0.0049	0.0065	0.45	-0.015	0.0039	0.00014	-0.065	0.0232	0.005049	0.657976	0.00604272
rs2992732	TC	1	18802825	G	A	-0.009	0.0013	11.3546	-0.0012	0.0065	0.85	-0.0023	0.004	0.5585	0.0253	0.0241	0.2931	0.00194213	0.00495957
rs2992752	LDL	1	18808526	A	C	-0.0104	0.0013	14.9051	-0.0016	0.0065	0.81	-0.0015	0.004	0.7063	0.0267	0.0237	0.2597	0.00178336	0.00493485
rs11340914	logTG	1	23747996	G	GA	-0.013	0.0015	17.3517	na	na	na	0.0104	0.0052	0.04441	na	na	na	0.0250989	0.00710906
rs946269	TC	1	23769359	C	T	-0.0225	0.0016	44.19	0.0041	0.0093	0.66	-0.0121	0.0048	0.01066	0.0161	0.0338	0.6337	0.0246176	0.00741096
rs534417	LDL	1	23784965	G	A	-0.0145	0.0017	16.8324	0.0039	0.0097	0.69	-0.0117	0.0049	0.01617	0.0131	0.035	0.709	0.0282345	0.00745845
rs7551124	nonHDL	1	23785760	T	C	-0.0191	0.002	20.8871	0.0035	0.0096	0.71	-0.0111	0.0049	0.02377	0.0148	0.0351	0.6723	0.0238339	0.0074637
rs11802413	TC	1	25760920	T	C	-0.0254	0.0012	98.7127	-0.0059	0.0064	0.36	0.0013	0.0037	0.7277	0.0323	0.0236	0.1717	0.0022882	0.0070235
rs9438905	nonHDL	1	25764177	G	A	-0.027	0.0015	71.7104	-0.0062	0.0064	0.34	0.0025	0.0037	0.5007	0.0343	0.0236	0.1469	0.00343346	0.00684447
rs10903129	LDL	1	25768937	G	A	-0.0254	0.0013	84.2864	-0.0058	0.0064	0.37	0.0016	0.0037	0.6705	0.0327	0.023	0.1542	0.00965132	0.00720724
rs213641	logTG	1	26232356	A	C	-0.0091	0.0013	11.5918	-0.011	0.0065	0.11	0.0053	0.0039	0.1782	-0.0004	0.0238	0.9874	0.00380058	0.0152664
rs113565903	LDL	1	26512556	T	C	-0.0335	0.0044	13.5743	-0.029	0.021	0.16	-0.0046	0.0139	0.7425	-0.0016	0.0745	0.9824	0.00360038	0.789401
rs113565903	nonHDL	1	26512556	T	C	-0.041	0.0051	15.0438	-0.029	0.021	0.16	-0.0046	0.0139	0.7425	-0.0016	0.0745	0.9824	0.00510155	0.135412
rs114165349	LDL	1	27021913	C	G	-0.0828	0.0045	74.8815	-0.077	0.021	0.00025	-0.0432	0.0148	0.00347	-0.0612	0.0783	0.4344	0.279777	0.894626
rs114165349	logTG	1	27021913	C	G	-0.0675	0.0045	50.1342	-0.077	0.021	0.00025	-0.0432	0.0148	0.00347	-0.0612	0.0783	0.4344	0.279879	0.894609
rs114165349	nonHDL	1	27021913	C	G	-0.0972	0.0052	77.2427	-0.077	0.021	0.00025	-0.0432	0.0148	0.00347	-0.0612	0.0783	0.4344	0.279777	0.894612
rs114165349	TC	1	27021913	C	G	-0.0598	0.0044	41.3435	-0.077	0.021	0.00025	-0.0432	0.0148	0.00347	-0.0612	0.0783	0.4344	0.279855	0.89461
rs41291086	LDL	1	27668610	T	C	-0.0379	0.0037	23.8965	-0.04	0.017	0.018	-0.0292	0.0122	0.0163	-0.0009	0.0663	0.9889	0.0520131	0.0367212
rs41309280	logTG	1	27688814	T	C	-0.0226	0.0037	8.99646	-0.026	0.018	0.16	-0.0305	0.0124	0.01384	-0.0032	0.0671	0.9624	0.045374	0.0501092
rs41309280	nonHDL	1	27688814	T	C	-0.0435	0.0043	23.3299	-0.026	0.018	0.16	-0.0305	0.0124	0.01384	-0.0032	0.0671	0.9624	0.0456962	0.0596606
rs41309280	TC	1	27688814	T	C	-0.0292	0.0036	15.2997	-0.026	0.018	0.16	-0.0305	0.0124	0.01384	-0.0032	0.0671	0.9624	0.0443858	0.0838757
rs7549174	TC	1	28319484	A	G	-0.0122	0.0013	20.1997	-0.0076	0.0068	0.27	0.0012	0.004	0.7614	-0.0372	0.0253	0.1403	0.00160626	0.00881984
rs6696836	logTG	1	36021738	C	T	-0.017	0.0024	11.8516	-0.043	0.018	0.016	-0.0061	0.0066	0.3496	0.0811	0.065	0.2116	0.00240913	0.167597
rs59703905	logTG	1	39312160	A	G	-0.0114	0.0016	11.9826	-0.026	0.0088	0.0026	-0.0071	0.0048	0.1363	-0.0175	0.0324	0.5888	0.0053884	0.372659
rs4329504	TC	1	39451488	A	G	-0.0099	0.0013	13.5802	0.015	0.0064	0.016	0.0028	0.0042	0.5031	0.0006	0.0237	0.9796	0.00195756	2.7166e-08
rs3768321	logTG	1	40035928	T	G	-0.021	0.0017	34.3282	-0.085	0.008	1.3e-26	-0.0156	0.0052	0.002615	-0.0422	0.0289	0.1446	0.100244	0.922176
rs7514998	TC	1	45494828	G	C	-0.0093	0.0013	12.0738	-0.0097	0.0071	0.17	-0.0055	0.0041	0.1801	-0.0477	0.0268	0.07526	0.0429982	0.00953999
rs17853159	LDL	1	45810865	G	A	-0.0217	0.0025	17.4026	0.0021	0.012	0.86	-0.0204	0.0079	0.00994	0.0304	0.0427	0.477	0.0789909	0.00889907
rs143064733	nonHDL	1	49204135	G	A	-0.1267	0.0196	9.99234	-0.11	0.1	0.28	na	na	na	0.1359	0.7159	0.8495	0.000691429	0.0294358
rs547856250	LDL	1	49263479	G	A	-0.1356	0.0192	11.7864	-0.087	0.1	0.41	na	na	na	0.2788	0.7102	0.6946	0.0016307	0.0299454
rs79090772	logTG	1	51209148	T	C	-0.0233	0.0022	25.4836	-0.068	0.011	1.9e-09	-0.0116	0.0065	0.07333	-0.0056	0.0408	0.8905	0.0149993	0.918059
rs570553136	LDL	1	52262405	A	G	-0.1675	0.0186	18.6677	-0.094	0.099	0.34	na	na	na	1.8549	2.1661	0.3918	0.000507995	0.0314727
rs570553136	nonHDL	1	52262405	A	G	-0.1587	0.0191	16.0151	-0.094	0.099	0.34	na	na	na	1.8549	2.1661	0.3918	0.000836701	0.0314727
rs570553136	TC	1	52262405	A	G	-0.1569	0.0183	16.9993	-0.094	0.099	0.34	na	na	na	1.8549	2.1661	0.3918	0.000881585	0.0314727
rs191875604	LDL	1	54246772	T	C	-0.1894	0.0167	29.0867	-0.08	0.11	0.47	na	na	na	2.4334	2.3945	0.3095	0.0364525	0.0255754
rs191875604	nonHDL	1	54246772	T	C	-0.1827	0.0183	22.7452	-0.08	0.11	0.47	na	na	na	2.4334	2.3945	0.3095	0.0364525	0.0255776
rs191875604	TC	1	54246772	T	C	-0.1653	0.0165	22.8968	-0.08	0.11	0.47	na	na	na	2.4334	2.3945	0.3095	0.0364525	0.0255712
rs146568567	LDL	1	54824117	G	A	-0.1162	0.0102	29.3396	-0.037	0.047	0.43	0.0881	0.0589	0.1348	0.4242	0.237	0.07346	0.0513747	0.0239809
rs146568567	nonHDL	1	54824117	G	A	-0.1093	0.0112	21.7723	-0.037	0.047	0.43	0.0881	0.0589	0.1348	0.4242	0.237	0.07346	0.0513748	0.0239809
rs1883783	logTG	1	54890956	G	T	-0.0115	0.0013	18.0429	0.012	0.0061	0.057	0.0009	0.0038	0.81	0.0163	0.0236	0.4917	0.00152252	0.0264846
rs11591147	LDL	1	55505647	G	T	-0.4337	0.0053	1456.07	0.036	0.026	0.16	-0.221	0.0177	5.973e-36	0.0504	0.0915	0.5817	1	0.0420479
rs11591147	nonHDL	1	55505647	G	T	-0.4116	0.0063	928.794	0.036	0.026	0.16	-0.221	0.0177	5.973e-36	0.0504	0.0915	0.5817	1	0.0420512
rs11591147	TC	1	55505647	G	T	-0.3773	0.0052	1145.16	0.036	0.026	0.16	-0.221	0.0177	5.973e-36	0.0504	0.0915	0.5817	1	0.0420479
rs150103689	nonHDL	1	56105434	C	G	-0.3655	0.0201	73.1611	-0.12	0.11	0.28	na	na	na	-0.1713	0.6179	0.7816	0.136203	0.0284261
rs186538116	LDL	1	56840574	A	C	-0.3609	0.0191	78.9041	-0.14	0.097	0.15	na	na	na	-1.0594	0.5669	0.06164	9.45356e-18	0.0505553
rs186538116	nonHDL	1	56840574	A	C	-0.327	0.0198	60.5445	-0.14	0.097	0.15	na	na	na	-1.0594	0.5669	0.06164	9.69008e-18	0.0505553
rs186538116	TC	1	56840574	A	C	-0.3074	0.0188	59.3691	-0.14	0.097	0.15	na	na	na	-1.0594	0.5669	0.06164	9.45525e-18	0.0505553
rs115947018	nonHDL	1	57851746	G	A	-0.0213	0.0057	3.72968	-0.037	0.022	0.1	-0.0044	0.0154	0.777	0.0206	0.0899	0.8185	0.0303441	0.0288721
rs185172024	LDL	1	57872099	T	C	-0.1412	0.0182	14.0649	-0.072	0.1	0.47	na	na	na	-0.4498	0.5599	0.4218	0.0304201	0.0293913
rs185172024	TC	1	57872099	T	C	-0.1188	0.0178	10.6044	-0.072	0.1	0.47	na	na	na	-0.4498	0.5599	0.4218	0.0304121	0.0294421
rs72929847	logTG	1	61684630	G	A	-0.021	0.0024	17.6709	0.0041	0.012	0.73	0.0028	0.0075	0.7064	-0.0276	0.045	0.5392	0.00276886	0.00980605
rs72929847	nonHDL	1	61684630	G	A	-0.021	0.0029	12.3525	0.0041	0.012	0.73	0.0028	0.0075	0.7064	-0.0276	0.045	0.5392	0.00292135	0.0106364
rs17121833	TC	1	61692655	T	C	-0.0179	0.0024	13.0574	0.004	0.012	0.74	0	0.0078	0.9961	-0.026	0.0452	0.5656	0.00287251	0.0812418
rs2207794	LDL	1	61865627	C	T	-0.0098	0.0015	10.1916	0.013	0.0077	0.1	-0.0082	0.0043	0.055	0.0346	0.0287	0.2276	0.00988309	0.0221976
rs636523	LDL	1	62920008	A	G	-0.0411	0.0013	218.644	-0.0005	0.0069	0.94	-0.0076	0.0041	0.06193	0.0257	0.0244	0.2908	0.00884067	0.00500294
rs636523	logTG	1	62920008	A	G	-0.0726	0.0013	679.082	-0.0005	0.0069	0.94	-0.0076	0.0041	0.06193	0.0257	0.0244	0.2908	0.00884104	0.00500294
rs636523	nonHDL	1	62920008	A	G	-0.0627	0.0016	335.156	-0.0005	0.0069	0.94	-0.0076	0.0041	0.06193	0.0257	0.0244	0.2908	0.00481612	0.00518574
rs995000	TC	1	63107526	C	T	-0.0647	0.0013	539.664	0.0001	0.0066	0.99	-0.007	0.004	0.07604	0.016	0.0243	0.5092	0.0103691	0.00514482
rs772075075	logTG	1	63433116	G	A	-0.3593	0.0285	35.7141	-0.0016	0.11	0.99	na	na	na	-0.0369	0.4899	0.9399	0.00545993	0.010437
rs772075075	nonHDL	1	63433116	G	A	-0.2823	0.029	21.6677	-0.0016	0.11	0.99	na	na	na	-0.0369	0.4899	0.9399	0.00609306	0.011256
rs574313788	LDL	1	63679932	A	C	-0.4227	0.0602	11.6589	-0.25	0.24	0.31	na	na	na	0.3352	0.698	0.631	0.00105854	0.0179906
rs574313788	TC	1	63679932	A	C	-0.5535	0.0573	21.3495	-0.25	0.24	0.31	na	na	na	0.3352	0.698	0.631	0.00277192	0.0323148
rs530208504	logTG	1	64576995	C	T	-0.0775	0.0218	3.42261	-0.071	0.086	0.41	na	na	na	0.2305	0.3684	0.5315	0.000514484	0.0965585
rs4655772	LDL	1	66130398	G	A	-0.008	0.0013	9.12133	0.0089	0.0063	0.16	-0.0045	0.004	0.2553	-0.0351	0.0234	0.1333	0.00293018	0.0100162
rs11208700	TC	1	66133443	T	A	-0.0102	0.0012	16.7222	0.0086	0.0064	0.18	-0.0047	0.004	0.2347	-0.0352	0.0234	0.1313	0.00291059	0.00909968
rs583691	logTG	1	71397835	A	G	-0.0089	0.0013	11.12	-0.019	0.0064	0.0029	-0.0053	0.0039	0.1714	-0.0099	0.0237	0.6758	0.00655371	0.38761
rs2613505	logTG	1	72835410	T	C	-0.0127	0.0017	13.0978	-0.042	0.0082	3.6e-07	-0.0166	0.0053	0.001736	-0.013	0.0301	0.6646	0.541992	0.961519
rs9787306	nonHDL	1	78070458	C	T	-0.0095	0.0018	6.88353	0.0065	0.0079	0.41	-0.0166	0.0048	0.0005079	0.0054	0.0287	0.8521	0.300144	0.00660897
rs165316	logTG	1	91533297	A	G	-0.0125	0.0016	14.2513	0.0092	0.008	0.25	-0.0021	0.0047	0.6546	-0.0482	0.0292	0.09874	0.0021151	0.0118734
rs165316	nonHDL	1	91533297	A	G	-0.0131	0.0019	11.2679	0.0092	0.008	0.25	-0.0021	0.0047	0.6546	-0.0482	0.0292	0.09874	0.00240628	0.0138164
rs165316	TC	1	91533297	A	G	-0.0141	0.0015	20.2631	0.0092	0.008	0.25	-0.0021	0.0047	0.6546	-0.0482	0.0292	0.09874	0.00203903	0.0116421
rs11164605	nonHDL	1	92946479	A	G	-0.0234	0.002	30.8946	0.021	0.0079	0.0067	0.0171	0.0052	0.0009567	0.0514	0.0288	0.07426	0.360836	0.171315
rs2391159	LDL	1	92971951	C	T	-0.0234	0.0016	47.7109	0.021	0.0079	0.0064	0.0177	0.0052	0.0005843	0.0514	0.0287	0.07329	0.375365	0.17565
rs7530780	TC	1	93130268	T	C	-0.0185	0.0013	45.2289	0.018	0.0066	0.007	0.0123	0.0041	0.00254	0.0445	0.0242	0.06519	0.136154	0.143063
rs12133907	logTG	1	93850283	A	C	-0.0114	0.0013	17.745	-0.0053	0.0065	0.42	0.0024	0.0038	0.5295	-0.0093	0.0239	0.6971	0.00180762	0.00664888
rs4378243	logTG	1	98395881	G	T	-0.0133	0.0017	14.2894	-0.019	0.0079	0.013	-0.0105	0.0052	0.04516	-0.0245	0.0316	0.438	0.0133213	0.118756
rs397981117	nonHDL	1	107551018	CA	C	-0.0119	0.0017	11.5918	na	na	na	-0.0039	0.0046	0.3993	na	na	na	0.00281004	0.00773973
rs1977658	LDL	1	107607037	T	G	-0.0132	0.0015	17.8639	na	na	na	0.0063	0.0054	0.2455	na	na	na	0.00166991	0.0170287
rs115292790	LDL	1	109310728	G	A	-0.0585	0.0059	22.4469	0.028	0.028	0.31	-0.051	0.0184	0.005655	0.1115	0.1001	0.2657	0.395957	0.0309434
rs115292790	TC	1	109310728	G	A	-0.0435	0.0058	13.1951	0.028	0.028	0.31	-0.051	0.0184	0.005655	0.1115	0.1001	0.2657	0.509825	0.0375109
rs7528419	logTG	1	109817192	A	G	-0.0115	0.0015	13.7532	0.023	0.0076	0.0029	-0.0931	0.0046	5.44e-91	-0.0232	0.0275	0.3996	0.998846	0.130998
rs12740374	LDL	1	109817590	G	T	-0.1514	0.0015	2214.3	0.023	0.0076	0.0025	-0.0934	0.0046	1.46e-91	-0.0212	0.0276	0.4408	0.999732	0.14136
rs12740374	nonHDL	1	109817590	G	T	-0.1393	0.0018	1302.49	0.023	0.0076	0.0025	-0.0934	0.0046	1.46e-91	-0.0212	0.0276	0.4408	0.999732	0.141365
rs12740374	TC	1	109817590	G	T	-0.127	0.0015	1558.63	0.023	0.0076	0.0025	-0.0934	0.0046	1.46e-91	-0.0212	0.0276	0.4408	9.11355e-05	0.103372
rs140266316	LDL	1	110326545	G	A	-0.0591	0.0059	22.8914	0.04	0.026	0.13	-0.0247	0.0207	0.2318	-0.0589	0.0984	0.5496	0.598093	0.221526
rs140266316	nonHDL	1	110326545	G	A	-0.0522	0.0067	14.1775	0.04	0.026	0.13	-0.0247	0.0207	0.2318	-0.0589	0.0984	0.5496	0.583923	0.200924
rs140266316	TC	1	110326545	G	A	-0.0442	0.0057	14.0517	0.04	0.026	0.13	-0.0247	0.0207	0.2318	-0.0589	0.0984	0.5496	0.159797	0.00537856
rs1503832	TC	1	114489689	T	C	-0.009	0.0013	11.3546	0.0096	0.0072	0.19	-0.0083	0.0042	0.0486	-0.0046	0.0263	0.862	1.71598e-08	0.0120841
rs6696923	TC	1	118172538	G	A	-0.0086	0.0013	10.4311	-0.024	0.0065	0.00029	-0.0118	0.0039	0.002561	-0.0217	0.0237	0.3601	0.0566397	0.815315
rs181473381	TC	1	145472741	A	C	-0.1036	0.0124	16.1836	-0.032	0.079	0.69	-0.0642	0.0499	0.1979	0.0001	0.2498	0.9997	0.0313855	0.0403361
rs45548131	logTG	1	149899389	G	A	-0.0253	0.0025	23.3464	-0.049	0.012	4.3e-05	-0.0146	0.008	0.06883	-0.0606	0.0448	0.1766	0.0157307	0.830438
rs267733	LDL	1	150958836	A	G	-0.0195	0.0018	26.6211	-0.014	0.0088	0.12	-0.0046	0.0056	0.4031	-0.0024	0.0314	0.9394	6.44536e-05	0.0003637
rs267733	nonHDL	1	150958836	A	G	-0.0195	0.0022	18.111	-0.014	0.0088	0.12	-0.0046	0.0056	0.4031	-0.0024	0.0314	0.9394	6.44655e-05	0.000363619
rs61819215	TC	1	151064116	A	G	-0.0181	0.0025	12.3481	-0.0015	0.013	0.91	0.0076	0.0078	0.331	-0.0353	0.0464	0.446	0.00414578	0.000158211
rs184980867	LDL	1	151658543	G	A	-0.1125	0.0132	16.8073	0.017	0.056	0.76	-0.1661	0.0755	0.02772	0.0059	0.2362	0.9801	0.00575115	0.0336484
rs12354278	TC	1	154243457	T	A	-0.0126	0.0019	10.4787	0.0078	0.0097	0.42	-0.0003	0.0061	0.9542	0.0106	0.0348	0.7609	0.00205554	0.00288056
rs12750321	logTG	1	154251626	A	G	-0.0138	0.0014	22.1949	0.012	0.007	0.083	0.0009	0.0043	0.8254	-0.0275	0.0261	0.2917	0.00147624	0.00671632
rs12750321	nonHDL	1	154251626	A	G	-0.0106	0.0016	10.4594	0.012	0.007	0.083	0.0009	0.0043	0.8254	-0.0275	0.0261	0.2917	0.00150955	0.00667235
rs12743272	logTG	1	155033334	A	G	-0.0129	0.0019	10.9487	-0.0006	0.0095	0.95	-0.0035	0.0059	0.5588	-0.0265	0.0335	0.4292	0.00249162	0.00688707
rs4390169	LDL	1	155106054	A	G	-0.0112	0.0013	17.1567	-0.018	0.0063	0.0058	0.0068	0.0039	0.08316	0.0009	0.023	0.9677	0.00597842	0.174781
rs6676150	TC	1	155123837	G	C	-0.0092	0.0013	11.8315	-0.02	0.0065	0.0022	0.0073	0.0041	0.07264	-0.0095	0.0237	0.6871	0.00716907	0.166966
rs760077	nonHDL	1	155178782	T	A	-0.0082	0.0016	6.52646	-0.021	0.0065	0.0016	0.0108	0.0039	0.005718	-0.015	0.0236	0.5254	0.00411691	0.214552
rs2022003	LDL	1	158586966	T	A	-0.0106	0.0014	13.4328	0.0045	0.007	0.52	0.0073	0.004	0.06769	-0.021	0.0254	0.4081	0.00843009	0.00727432
rs2022003	nonHDL	1	158586966	T	A	-0.0124	0.0016	14.0367	0.0045	0.007	0.52	0.0073	0.004	0.06769	-0.021	0.0254	0.4081	0.00557615	0.00720187
rs857725	TC	1	158607935	G	T	-0.0122	0.0014	17.5337	0.0058	0.007	0.41	0.0062	0.0041	0.1319	-0.0315	0.0259	0.2238	0.00589588	0.00719952
rs115383270	LDL	1	161531340	A	G	-0.0187	0.0027	11.3634	-0.022	0.013	0.076	-0.0117	0.0084	0.166	-0.0446	0.0458	0.3308	0.00604357	0.036799
rs115383270	TC	1	161531340	A	G	-0.0246	0.0026	20.5179	-0.022	0.013	0.076	-0.0117	0.0084	0.166	-0.0446	0.0458	0.3308	0.00635944	0.0399283
rs12404665	nonHDL	1	172357433	T	C	-0.0111	0.0015	12.8659	-0.026	0.0064	4.8e-05	-0.0155	0.004	9.518e-05	-0.0517	0.0235	0.02748	0.698893	0.913233
rs9425300	logTG	1	172361977	T	G	-0.0133	0.0013	23.8405	-0.026	0.0064	5.8e-05	-0.0155	0.004	9.544e-05	-0.0519	0.0236	0.02744	0.699231	0.910499
rs7414200	nonHDL	1	174538958	G	C	-0.0122	0.0018	10.9135	-0.014	0.0075	0.058	-0.0037	0.0044	0.401	-0.0309	0.0269	0.2514	0.00261769	0.0269159
rs6682862	LDL	1	177938437	G	A	-0.0121	0.0016	13.403	0.018	0.0087	0.043	0.0038	0.0047	0.4199	0.0358	0.0309	0.2467	0.00237757	2.90571e-06
rs6682862	TC	1	177938437	G	A	-0.0092	0.0016	8.04942	0.018	0.0087	0.043	0.0038	0.0047	0.4199	0.0358	0.0309	0.2467	0.00399833	0.393357
rs1689801	LDL	1	182165484	A	G	-0.0131	0.0013	23.1556	0.0034	0.0067	0.61	-0.0046	0.004	0.2522	0.0114	0.0245	0.6418	0.00344433	0.00562508
rs1689801	nonHDL	1	182165484	A	G	-0.0145	0.0016	18.8945	0.0034	0.0067	0.61	-0.0046	0.004	0.2522	0.0114	0.0245	0.6418	0.00405012	0.00561814
rs7525917	LDL	1	183065406	G	A	-0.0115	0.0013	18.0429	-0.013	0.0064	0.05	-0.012	0.0037	0.001288	-0.0067	0.0233	0.7725	0.251508	0.0407631
rs3359	TC	1	183112041	C	G	-0.0119	0.0012	22.4531	-0.013	0.0064	0.044	-0.0125	0.0037	0.0006844	-0.0126	0.0233	0.5884	0.32787	0.0367027
rs10911263	nonHDL	1	183115018	T	C	-0.011	0.0015	12.6488	-0.013	0.0064	0.045	-0.013	0.0037	0.0004542	-0.0146	0.0233	0.5315	0.3736	0.038698
rs115276619	logTG	1	184865132	T	A	-0.0502	0.0055	19.1534	0.015	0.026	0.57	-0.0333	0.0182	0.06741	-0.0949	0.0936	0.3106	0.0289549	0.0194737
rs12137359	LDL	1	197129981	T	C	-0.0111	0.0017	10.1803	-0.0089	0.0086	0.3	0.0106	0.0048	0.02742	-0.0574	0.0313	0.06617	0.0198373	0.0103309
rs10922179	TC	1	197159347	A	G	-0.0117	0.0016	12.5813	-0.0083	0.0086	0.33	0.0107	0.0049	0.02936	-0.0568	0.0317	0.07359	0.019137	0.0103427
rs17625587	nonHDL	1	198990494	G	A	-0.0101	0.0017	8.54824	0	0.0071	1	0.0034	0.0045	0.4459	-0.0077	0.026	0.7663	0.0024556	0.00542649
rs1434282	LDL	1	199010721	T	C	-0.0099	0.0014	11.8143	0.0009	0.0071	0.9	0.0034	0.0044	0.4366	-0.0109	0.0256	0.6714	0.00229565	0.00532046
rs1434282	TC	1	199010721	T	C	-0.0087	0.0014	9.2877	0.0009	0.0071	0.9	0.0034	0.0044	0.4366	-0.0109	0.0256	0.6714	0.00304969	0.00644607
rs6686987	logTG	1	202184600	C	T	-0.0091	0.0013	11.5918	-0.0089	0.0065	0.17	0.0023	0.0039	0.5551	0.0168	0.0237	0.479	0.0016577	0.0126357
rs2486942	TC	1	203255493	A	T	-0.0079	0.0012	10.3372	0.014	0.0064	0.033	-0.0045	0.0038	0.232	-0.0018	0.0233	0.9381	0.00396556	0.0427326
rs2821226	logTG	1	203517292	A	G	-0.0132	0.0014	20.3812	-0.03	0.0066	5.9e-06	-0.0049	0.0041	0.2326	-0.0589	0.024	0.01415	0.00318145	0.965826
rs11240358	logTG	1	205070573	A	G	-0.0114	0.0013	17.745	-0.037	0.0065	1.6e-08	-0.0204	0.004	3.339e-07	-0.0301	0.0235	0.2004	0.966143	0.950908
rs12048743	nonHDL	1	205114873	G	C	-0.0101	0.0015	10.7804	-0.038	0.0064	4.4e-09	-0.0222	0.0039	1.271e-08	-0.0339	0.0232	0.1445	0.996671	0.990209
rs2820468	nonHDL	1	219673705	G	A	-0.0099	0.0016	9.21378	-0.048	0.0067	1.7e-12	-0.0107	0.004	0.007708	-0.0226	0.0244	0.3546	0.12331	0.0959781
rs2820441	logTG	1	219734960	A	C	-0.0193	0.0014	42.5077	-0.053	0.0068	6.8e-15	-0.0131	0.0041	0.001412	-0.01	0.0251	0.6918	0.0760837	0.425668
rs2642438	LDL	1	220970028	G	A	-0.0286	0.0014	92.0306	0.0061	0.007	0.39	-0.0046	0.0043	0.2845	-0.0558	0.025	0.0258	0.00285706	0.00713824
rs2642438	logTG	1	220970028	A	G	-0.0155	0.0014	27.7629	-0.0061	0.007	0.39	0.0046	0.0043	0.2845	0.0558	0.025	0.0258	0.00299656	0.00741512
rs2642438	nonHDL	1	220970028	G	A	-0.0223	0.0017	38.5835	0.0061	0.007	0.39	-0.0046	0.0043	0.2845	-0.0558	0.025	0.0258	0.00290148	0.00700333
rs2642438	TC	1	220970028	G	A	-0.0294	0.0014	97.1832	0.0061	0.007	0.39	-0.0046	0.0043	0.2845	-0.0558	0.025	0.0258	0.00292958	0.006889
rs11803981	LDL	1	224545410	T	C	-0.0111	0.0016	11.3989	0.0041	0.0076	0.59	-0.0031	0.0048	0.5161	0.0048	0.0275	0.8622	0.00203457	0.00720742
rs7519734	TC	1	224549524	T	C	-0.0139	0.0015	19.7166	0.004	0.0076	0.6	-0.0031	0.0048	0.5193	0.0052	0.0275	0.8502	0.00203783	0.00685512
rs6663522	nonHDL	1	224646328	C	T	-0.0127	0.0019	10.6342	0.0052	0.0076	0.5	-0.0026	0.0047	0.5723	0.0074	0.0276	0.7893	0.00200748	0.0067319
rs6690181	logTG	1	228056868	T	C	-0.0081	0.0014	8.14143	na	na	na	-0.0041	0.0055	0.4524	na	na	na	0.0028996	0.0124797
rs4846913	logTG	1	230294715	C	A	-0.0424	0.0013	232.605	-0.0029	0.0065	0.66	-0.0216	0.0039	3.529e-08	0.0006	0.0236	0.9802	0.90131	0.00505946
rs4846923	nonHDL	1	230307222	T	G	-0.015	0.0016	20.16	0.0044	0.007	0.53	-0.0192	0.0041	2.74e-06	0.0008	0.0258	0.9762	0.82577	0.00481474
rs75054794	logTG	1	230823363	G	A	-0.0224	0.0031	12.3027	-0.015	0.015	0.31	-0.0055	0.0098	0.5715	0.0416	0.057	0.4656	0.000174678	0.0145645
rs508293	logTG	1	234848712	A	G	-0.0085	0.0013	10.2065	-0.006	0.0062	0.34	-0.0104	0.004	0.009734	-0.0275	0.0235	0.2411	0.0469559	0.00736612
rs557933	LDL	1	234853268	C	A	-0.0391	0.0013	198.013	-0.0068	0.0064	0.29	-0.0105	0.0039	0.007638	-0.0278	0.0235	0.2371	0.0439048	0.00735346
rs557933	TC	1	234853268	C	A	-0.0414	0.0012	260.096	-0.0068	0.0064	0.29	-0.0105	0.0039	0.007638	-0.0278	0.0235	0.2371	0.0407567	0.00740956
rs558971	nonHDL	1	234853406	G	A	-0.0395	0.0015	152.099	-0.0066	0.0063	0.3	-0.0106	0.0039	0.006673	-0.0277	0.0235	0.2372	0.0431081	0.00740386
rs12121187	LDL	1	246892695	A	G	-0.0146	0.0021	11.4447	-0.027	0.011	0.017	-0.0141	0.006	0.01797	-0.0115	0.04	0.7734	0.127127	0.100178
rs62114538	logTG	2	256116	G	T	-0.0107	0.0013	15.7305	-0.011	0.0066	0.11	-0.0099	0.004	0.01208	-0.0357	0.024	0.1376	0.0237908	0.0345559
rs56236159	nonHDL	2	3636478	G	T	-0.0122	0.002	8.97441	0.0095	0.0095	0.32	-0.0283	0.0051	3.026e-08	-0.0031	0.0342	0.9273	0.997391	0.0105636
rs6542680	logTG	2	3640142	T	C	-0.0155	0.0016	21.4675	-0.014	0.0084	0.099	0.0242	0.0047	2.45e-07	0.0096	0.0302	0.7508	0.979849	0.0220618
rs6542680	TC	2	3640142	C	T	-0.0168	0.0015	28.3896	0.014	0.0084	0.099	-0.0242	0.0047	2.45e-07	-0.0096	0.0302	0.7508	0.978306	0.0220412
rs3820897	LDL	2	3642361	T	C	-0.0163	0.0016	23.6469	0.014	0.0084	0.1	-0.0229	0.0046	7.555e-07	-0.0056	0.0297	0.8498	0.993496	0.0185701
rs11679703	LDL	2	8718961	G	A	-0.0104	0.0014	12.9595	0.014	0.0073	0.057	-0.0057	0.0042	0.1742	0.0387	0.027	0.1525	0.00365326	0.0312963
rs4669294	TC	2	8723673	G	A	-0.0109	0.0014	14.1591	0.014	0.0072	0.059	-0.0055	0.0042	0.1987	0.04	0.0272	0.1413	0.00361078	0.0304992
rs798383	LDL	2	16890382	C	G	-0.0046	0.0018	1.97462	na	na	na	0.0017	0.0055	0.7609	na	na	na	0.00147641	0.0109235
rs750772	LDL	2	17967586	A	G	-0.0175	0.0019	19.4887	0.02	0.01	0.056	-0.0022	0.0057	0.6958	-0.009	0.0371	0.8079	0.00191046	0.0470617
rs750772	nonHDL	2	17967586	A	G	-0.0181	0.0023	14.4487	0.02	0.01	0.056	-0.0022	0.0057	0.6958	-0.009	0.0371	0.8079	0.00188096	0.0458245
rs750772	TC	2	17967586	A	G	-0.0176	0.0019	19.7023	0.02	0.01	0.056	-0.0022	0.0057	0.6958	-0.009	0.0371	0.8079	0.0019051	0.0504786
rs759257847	LDL	2	19693384	G	A	-0.5752	0.0916	9.46888	0.52	0.46	0.26	na	na	na	-0.3774	1.3818	0.7847	0.000842642	0.0290619
rs759257847	nonHDL	2	19693384	G	A	-0.4422	0.0884	6.24671	0.52	0.46	0.26	na	na	na	-0.3774	1.3818	0.7847	0.00125971	0.0242807
rs759257847	TC	2	19693384	G	A	-0.381	0.078	5.98451	0.52	0.46	0.26	na	na	na	-0.3774	1.3818	0.7847	0.0022936	0.026508
rs79279183	LDL	2	20370641	A	C	-0.0183	0.0013	44.2786	na	na	na	0.0036	0.0047	0.4503	na	na	na	0.00258289	0.00524785
rs907866	nonHDL	2	20371380	G	A	-0.0225	0.0015	50.1342	0.0042	0.0064	0.51	0.0034	0.0038	0.3597	0.0042	0.0232	0.8567	0.00223372	0.00585644
rs907866	TC	2	20371380	G	A	-0.0259	0.0012	102.589	0.0042	0.0064	0.51	0.0034	0.0038	0.3597	0.0042	0.0232	0.8567	0.0022343	0.0058571
rs1107850	logTG	2	20371772	G	A	-0.0181	0.0012	50.681	0.003	0.0064	0.64	0.0022	0.0037	0.5621	0.0025	0.0231	0.9139	0.00198112	0.00525248
rs676210	logTG	2	21231524	G	A	-0.0642	0.0015	399.509	0.0026	0.0082	0.75	0.0087	0.0044	0.0481	-0.0333	0.0279	0.232	3.94289e-14	0.00605717
rs934197	LDL	2	21267461	A	G	-0.0948	0.0014	997.598	0.0044	0.0063	0.49	-0.0191	0.0043	6.96e-06	0.0142	0.0246	0.565	0.993449	0.0618106
rs934197	nonHDL	2	21267461	A	G	-0.0927	0.0016	730.771	0.0044	0.0063	0.49	-0.0191	0.0043	6.96e-06	0.0142	0.0246	0.565	1.3533e-10	0.00633166
rs934197	TC	2	21267461	A	G	-0.0835	0.0013	897.767	0.0044	0.0063	0.49	-0.0191	0.0043	6.96e-06	0.0142	0.0246	0.565	7.84896e-11	0.00654557
rs114040256	logTG	2	21778585	A	G	-0.0511	0.0078	10.2438	-0.042	0.034	0.22	-0.0629	0.0413	0.1275	0.138	0.1391	0.3214	0.0382429	0.0448922
rs147821144	nonHDL	2	21818551	G	A	-0.3834	0.0278	42.5417	na	na	na	na	na	na	na	na	na	0.143143	0.0094425
rs147821144	TC	2	21818551	G	A	-0.2897	0.0208	43.3677	na	na	na	na	na	na	na	na	na	0.159434	0.0097744
rs191450029	LDL	2	21942500	C	G	-0.7993	0.0744	26.1956	-0.43	0.3	0.16	na	na	na	0.2108	1.0148	0.8355	0.0143913	0.0132516
rs148868229	nonHDL	2	22445083	C	T	-0.2867	0.0295	21.6001	na	na	na	na	na	na	na	na	na	0.0247313	0.0330772
rs148868229	TC	2	22445083	C	T	-0.2323	0.0222	24.8981	na	na	na	na	na	na	na	na	na	0.0222892	0.0318622
rs4665495	LDL	2	22501253	T	G	-0.0005	0.0013	0.154578	0.017	0.0063	0.0067	0.0066	0.0039	0.08685	0.0262	0.0231	0.258	0.0251739	0.0210883
rs11889451	LDL	2	23015285	C	T	-0.0058	0.0016	3.53916	-0.0011	0.0091	0.9	-0.0029	0.0047	0.5292	0.0644	0.0321	0.04487	0.0211556	0.0405888
rs557901815	nonHDL	2	23117602	C	T	-0.3928	0.0484	15.3161	na	na	na	na	na	na	na	na	na	0.0456274	0.0570606
rs557901815	TC	2	23117602	C	T	-0.3009	0.0351	16.9951	na	na	na	na	na	na	na	na	na	0.00247119	0.0496848
rs749331	TC	2	23882347	G	A	-0.003	0.0013	1.67744	0.005	0.0064	0.44	-0.0086	0.0039	0.02921	0.0148	0.0233	0.5275	0.0195743	0.0062879
rs55661701	LDL	2	24400769	C	A	-0.0098	0.0015	10.1916	-0.0001	0.0079	0.99	-0.0139	0.0048	0.003579	0.0163	0.0265	0.538	0.0390218	0.00711905
rs72387328	TC	2	24726602	GT	G	-0.0123	0.0016	13.8238	na	na	na	-0.0021	0.0057	0.7133	na	na	na	0.00362251	0.0283927
rs11903847	logTG	2	25592918	T	C	-0.0078	0.0014	7.59747	-0.021	0.0068	0.002	-0.0057	0.0041	0.1622	0.0058	0.0249	0.815	0.00404743	0.00735684
rs4665299	TC	2	26256840	A	C	-0.0098	0.0015	10.1916	0.014	0.0079	0.069	-0.0018	0.0048	0.7055	0.0069	0.0284	0.8072	0.00444831	0.0153802
rs142787485	LDL	2	26358156	A	G	-0.0275	0.0039	11.7513	-0.0018	0.018	0.92	-0.0164	0.0135	0.2235	0.0145	0.0668	0.8276	0.00906008	0.0119672
rs142787485	nonHDL	2	26358156	A	G	-0.0305	0.0044	11.3815	-0.0018	0.018	0.92	-0.0164	0.0135	0.2235	0.0145	0.0668	0.8276	0.00801961	0.01223
rs1275984	TC	2	26911509	C	A	-0.0105	0.0012	17.6709	-0.009	0.0065	0.17	0.0001	0.0039	0.9887	0.0107	0.0238	0.6539	0.00333356	0.062162
rs1275979	LDL	2	26923568	C	T	-0.0095	0.0013	12.5658	-0.0088	0.0065	0.18	-0.0003	0.0039	0.9431	0.0052	0.0239	0.8281	0.00143863	0.00925691
rs57035494	logTG	2	26924018	C	G	-0.0375	0.0035	26.0593	0.03	0.017	0.08	-0.0178	0.0117	0.1273	0.0313	0.0634	0.6222	0.00409259	0.0515188
rs13394970	nonHDL	2	26929282	G	T	-0.0123	0.0015	15.6191	-0.0086	0.0065	0.19	0	0.0038	0.9982	-0.0016	0.0239	0.945	0.00144406	0.00871495
rs1260326	LDL	2	27730940	T	C	-0.0305	0.0013	120.997	0.067	0.0065	1.3e-24	-0.0128	0.0038	0.0008263	-0.1364	0.0233	5.119e-09	0.258352	0.999886
rs1260326	logTG	2	27730940	T	C	-0.1101	0.0013	1559.58	0.067	0.0065	1.3e-24	-0.0128	0.0038	0.0008263	-0.1364	0.0233	5.119e-09	0.258352	0.999886
rs1260326	nonHDL	2	27730940	T	C	-0.0591	0.0015	338.785	0.067	0.0065	1.3e-24	-0.0128	0.0038	0.0008263	-0.1364	0.0233	5.119e-09	0.258352	0.999886
rs1260326	TC	2	27730940	T	C	-0.0603	0.0013	468.964	0.067	0.0065	1.3e-24	-0.0128	0.0038	0.0008263	-0.1364	0.0233	5.119e-09	0.346644	0.964711
rs34588907	TC	2	29133905	G	C	-0.0086	0.0016	7.11587	-0.0068	0.0076	0.37	0.0055	0.005	0.279	-0.0297	0.0274	0.2787	0.00813326	0.0105491
rs62142080	TC	2	32182528	T	C	-0.0084	0.0013	9.98446	-0.0072	0.0065	0.27	-0.0042	0.0039	0.2851	-0.0128	0.0239	0.5935	0.00205409	0.00818952
rs745763	nonHDL	2	43455654	C	T	-0.0196	0.002	21.9485	-0.01	0.0087	0.23	-0.0002	0.0052	0.9684	-0.0303	0.0328	0.3562	0.00123027	9.58675e-18
rs58839393	logTG	2	43490619	T	A	-0.0143	0.0017	16.3937	-0.014	0.0088	0.11	0.0001	0.0051	0.9821	-0.0245	0.0318	0.4413	0.000240596	5.07179e-09
rs12468394	LDL	2	43561161	A	C	-0.0138	0.0013	25.5973	-0.022	0.0064	0.00064	0.0005	0.0038	0.8969	-0.006	0.0232	0.7952	0.00125595	4.90347e-21
rs12468394	TC	2	43561161	A	C	-0.0126	0.0012	25.0636	-0.022	0.0064	0.00064	0.0005	0.0038	0.8969	-0.006	0.0232	0.7952	0.000351068	1.19455e-18
rs4245791	LDL	2	44074431	C	T	-0.069	0.0014	529.259	0.0036	0.0068	0.6	-0.0431	0.0043	3.388e-23	-0.0025	0.0245	0.9199	0.999562	4.04025e-06
rs4245791	logTG	2	44074431	C	T	-0.0103	0.0014	12.7261	0.0036	0.0068	0.6	-0.0431	0.0043	3.388e-23	-0.0025	0.0245	0.9199	0.99908	4.01137e-06
rs4245791	nonHDL	2	44074431	C	T	-0.07	0.0017	369.886	0.0036	0.0068	0.6	-0.0431	0.0043	3.388e-23	-0.0025	0.0245	0.9199	0.99666	3.76279e-06
rs4245791	TC	2	44074431	C	T	-0.064	0.0014	455.552	0.0036	0.0068	0.6	-0.0431	0.0043	3.388e-23	-0.0025	0.0245	0.9199	0.999563	4.04025e-06
rs556971810	nonHDL	2	44663206	T	A	-0.0933	0.0092	23.441	na	na	na	0.0509	0.0414	0.2194	na	na	na	0.0137677	0.0339634
rs556971810	TC	2	44663206	T	A	-0.0945	0.008	31.4731	na	na	na	0.0509	0.0414	0.2194	na	na	na	0.0254885	0.033951
rs140879085	LDL	2	44663302	C	T	-0.0957	0.0073	38.5374	0.034	0.032	0.28	0.0152	0.0261	0.5588	-0.022	0.1302	0.8661	0.0106854	0.0339633
rs12712955	LDL	2	46166321	A	G	-0.012	0.0013	19.5707	-0.0017	0.0063	0.79	-0.0089	0.0039	0.02202	-0.019	0.023	0.4088	0.0202327	0.00475122
rs12712955	nonHDL	2	46166321	A	G	-0.0102	0.0015	10.9804	-0.0017	0.0063	0.79	-0.0089	0.0039	0.02202	-0.019	0.023	0.4088	0.0237402	0.00473644
rs12712955	TC	2	46166321	A	G	-0.0116	0.0012	21.3791	-0.0017	0.0063	0.79	-0.0089	0.0039	0.02202	-0.019	0.023	0.4088	0.0196989	0.00475324
rs17326656	logTG	2	48962291	T	G	-0.0119	0.0015	14.6709	-0.0074	0.0075	0.33	-0.0094	0.0048	0.05103	0.0275	0.0277	0.3209	0.0118318	0.00868369
rs17615494	logTG	2	58950363	T	G	-0.0099	0.0014	11.8143	-0.035	0.0069	3.7e-07	-0.0074	0.0042	0.07858	-0.018	0.0254	0.4771	0.00685652	0.93372
rs921153	TC	2	61563408	G	A	-0.0107	0.0016	10.6439	-0.0007	0.0088	0.94	0.001	0.0049	0.8391	-0.0375	0.0313	0.2311	0.00196927	0.00384037
rs2166720	nonHDL	2	61577435	T	C	-0.0123	0.002	9.11079	-0.0035	0.0089	0.69	0.0021	0.005	0.672	-0.0446	0.0316	0.1583	0.000960621	0.00400058
rs766448	logTG	2	61735446	C	T	-0.01	0.0013	13.8401	-0.0034	0.0064	0.6	-0.0137	0.0038	0.0002908	-0.0227	0.0234	0.3307	0.110342	0.00504038
rs360804	LDL	2	62939397	G	A	-0.0225	0.0014	57.3929	-0.025	0.0068	0.00023	-0.0228	0.0041	3.69e-08	-0.0387	0.0247	0.1174	0.528335	0.87127
rs189671	nonHDL	2	62959308	T	A	-0.023	0.0016	46.1292	-0.026	0.0068	0.00015	-0.0217	0.0041	1.188e-07	-0.0397	0.0246	0.1066	0.760579	0.811859
rs78784525	TC	2	62978981	G	T	-0.0188	0.0013	46.6737	-0.026	0.0068	0.00011	-0.0214	0.0041	1.675e-07	-0.0315	0.0246	0.2009	0.851215	0.852268
rs954680	nonHDL	2	64913045	G	C	-0.0124	0.0017	12.522	-0.014	0.0069	0.039	0.0011	0.0043	0.8031	-0.0587	0.0259	0.02355	0.00166485	0.0231247
rs1477034	LDL	2	64923808	T	C	-0.0118	0.0014	16.456	-0.014	0.0069	0.05	-0.0007	0.0043	0.8695	-0.0535	0.0259	0.03935	0.00162021	0.0280942
rs1477034	TC	2	64923808	T	C	-0.0147	0.0014	25.0636	-0.014	0.0069	0.05	-0.0007	0.0043	0.8695	-0.0535	0.0259	0.03935	0.00167112	0.0205247
rs2252867	logTG	2	65296280	T	C	-0.0188	0.0013	46.6737	-0.053	0.0066	1.3e-15	-0.0095	0.0038	0.01205	-0.0198	0.0237	0.4021	0.0105841	0.994698
rs906578	TC	2	65601600	C	A	-0.0116	0.0012	21.3791	-0.037	0.0064	8.4e-09	-0.0039	0.0039	0.3154	-0.0192	0.0233	0.4107	0.00105386	5.07972e-05
rs2280334	logTG	2	66665146	T	C	-0.01	0.0013	13.8401	-0.024	0.0068	0.00051	-0.0069	0.0039	0.07211	-0.0409	0.0242	0.09135	0.0116536	0.480459
rs2592182	LDL	2	70449776	G	A	-0.0108	0.0013	16.0106	-0.0046	0.0065	0.48	-0.0122	0.0039	0.001775	-0.0305	0.0239	0.2012	0.0534187	0.00623861
rs2706770	TC	2	70471899	G	A	-0.0136	0.0012	29.0471	-0.0046	0.0064	0.48	-0.0118	0.0039	0.002489	-0.0299	0.0237	0.2067	0.0999662	0.0062264
rs55634460	nonHDL	2	70511784	G	T	-0.0101	0.0015	10.7804	-0.0046	0.0065	0.48	-0.0121	0.0039	0.001823	-0.0315	0.0237	0.1849	0.146706	0.00642167
rs2419077	TC	2	71648425	G	T	-0.0082	0.0014	8.32707	-0.0011	0.0072	0.88	-0.0052	0.0042	0.2237	-0.0281	0.0262	0.2827	0.0299656	0.00670421
rs10185019	logTG	2	72329685	T	C	-0.0079	0.0013	8.91183	-0.016	0.0067	0.021	-0.0071	0.004	0.0735	-0.0909	0.0247	0.0002333	0.0082276	0.0576693
rs58588820	TC	2	85874044	C	T	-0.0098	0.0013	13.3228	-0.0056	0.0067	0.41	0.0303	0.0041	8.665e-14	-0.003	0.0246	0.9031	1.68361e-06	0.0121663
rs11887443	LDL	2	85879041	G	T	-0.0114	0.0016	11.9826	na	na	na	0.0299	0.006	5.596e-07	na	na	na	1.85308e-05	0.0166576
rs308915	TC	2	86859298	A	C	-0.0092	0.0013	11.8315	-0.0094	0.0064	0.14	-0.0049	0.004	0.2191	-0.0336	0.0235	0.1526	0.00278777	0.0066741
rs2919872	nonHDL	2	88428571	T	C	-0.0108	0.0015	12.2203	0.0029	0.0064	0.65	0	0.004	0.9998	0.0158	0.0231	0.4926	0.00149251	0.00552051
rs4246598	LDL	2	88438050	A	C	-0.0101	0.0013	14.1026	0.0039	0.0064	0.54	0.0003	0.0039	0.942	0.0132	0.0232	0.5683	0.00149596	0.00570098
rs4246598	TC	2	88438050	A	C	-0.0094	0.0012	14.3232	0.0039	0.0064	0.54	0.0003	0.0039	0.942	0.0132	0.0232	0.5683	0.00149524	0.00571487
rs10171847	LDL	2	101631888	C	G	-0.0123	0.0013	20.5179	0.0007	0.0066	0.92	-0.0122	0.0039	0.001984	-0.0306	0.0238	0.1975	0.139184	0.00465244
rs10171847	nonHDL	2	101631888	C	G	-0.0125	0.0015	16.1046	0.0007	0.0066	0.92	-0.0122	0.0039	0.001984	-0.0306	0.0238	0.1975	0.131075	0.0046546
rs10171847	TC	2	101631888	C	G	-0.0111	0.0012	19.6488	0.0007	0.0066	0.92	-0.0122	0.0039	0.001984	-0.0306	0.0238	0.1975	0.126123	0.00463949
rs2577619	LDL	2	109090267	C	G	-0.0184	0.0016	29.8797	0.027	0.0081	0.00087	-0.0035	0.0048	0.4663	-0.0237	0.0294	0.4203	0.00227396	0.464403
rs1992172	nonHDL	2	109093836	G	A	-0.019	0.0019	22.817	0.027	0.0081	0.00095	-0.0037	0.0048	0.4369	-0.0235	0.0294	0.4247	0.00235818	0.538641
rs2718744	TC	2	109146017	A	T	-0.0176	0.0016	27.4178	0.021	0.0087	0.015	-0.0014	0.0051	0.7801	-0.0244	0.0315	0.4381	0.00209764	0.220069
rs3789129	TC	2	111698040	C	A	-0.0109	0.0015	12.4336	-0.013	0.0084	0.13	0.0049	0.0047	0.2909	0.0056	0.0304	0.8546	0.00289776	0.0167044
rs6708784	logTG	2	111927379	A	G	-0.0126	0.0013	21.488	-0.025	0.0064	7.5e-05	0	0.0038	0.9966	0.0056	0.0232	0.8099	0.00152672	0.915804
rs7583987	logTG	2	112763640	C	G	-0.0086	0.0013	10.4311	-0.019	0.0065	0.0039	0.0008	0.0039	0.8332	-0.008	0.0236	0.7356	0.00124582	0.0898288
rs6734238	LDL	2	113841030	A	G	-0.0089	0.0013	11.12	-0.0051	0.0064	0.43	-0.0172	0.004	1.424e-05	-0.0235	0.0233	0.3121	0.0240308	0.00620847
rs6734238	TC	2	113841030	A	G	-0.0135	0.0013	24.5356	-0.0051	0.0064	0.43	-0.0172	0.004	1.424e-05	-0.0235	0.0233	0.3121	0.0317954	0.00630375
rs13398728	nonHDL	2	113842506	T	C	-0.0117	0.0016	12.5813	-0.0045	0.0064	0.48	-0.0142	0.004	0.0004231	-0.022	0.0235	0.35	0.00411257	0.00591713
rs55709272	logTG	2	113867288	T	C	-0.0091	0.0013	11.5918	-0.0059	0.0064	0.36	-0.017	0.004	1.982e-05	-0.0356	0.0232	0.125	0.00801377	0.00629925
rs55938402	LDL	2	118843158	G	A	-0.0421	0.0023	74.1169	0.0062	0.011	0.57	-0.0296	0.0073	4.667e-05	-0.0088	0.0389	0.8218	0.874904	0.00937215
rs55938402	nonHDL	2	118843158	G	A	-0.0424	0.0027	54.8457	0.0062	0.011	0.57	-0.0296	0.0073	4.667e-05	-0.0088	0.0389	0.8218	0.872948	0.00934724
rs55938402	TC	2	118843158	G	A	-0.0376	0.0022	64.7608	0.0062	0.011	0.57	-0.0296	0.0073	4.667e-05	-0.0088	0.0389	0.8218	0.874854	0.00937042
rs78198921	logTG	2	119749146	G	C	-0.0439	0.0056	14.3438	-0.0012	0.027	0.96	0.022	0.0177	0.2127	-0.0487	0.0971	0.616	0.0178115	0.018426
rs17050272	LDL	2	121306440	G	A	-0.0219	0.0013	62.9509	0.031	0.0066	3.5e-06	-0.006	0.0039	0.1179	0.0106	0.0232	0.6471	0.00504782	6.12961e-06
rs17050272	nonHDL	2	121306440	G	A	-0.0228	0.0016	45.3484	0.031	0.0066	3.5e-06	-0.006	0.0039	0.1179	0.0106	0.0232	0.6471	0.00505294	6.15428e-06
rs17050272	TC	2	121306440	G	A	-0.0191	0.0013	48.1414	0.031	0.0066	3.5e-06	-0.006	0.0039	0.1179	0.0106	0.0232	0.6471	0.00504824	6.13164e-06
rs954244	logTG	2	121309231	G	C	-0.0162	0.0014	30.2402	-0.0092	0.0073	0.21	-0.0124	0.0043	0.003765	0.0182	0.0271	0.5035	0.0914379	1.50441e-07
rs563563230	LDL	2	122797791	C	G	-0.4657	0.086	7.2129	-0.3	0.37	0.43	na	na	na	1.8695	1.218	0.1248	0.0013804	0.0420178
rs60668151	TC	2	134874008	G	A	-0.0093	0.0014	10.5119	-0.02	0.0083	0.018	-0.0036	0.0044	0.4111	0.0229	0.0291	0.4311	0.0022231	0.0866729
rs2460382	LDL	2	135014116	A	G	-0.0118	0.0015	14.4386	-0.0012	0.0076	0.88	-0.0055	0.0044	0.206	-0.0177	0.0282	0.5296	0.00377469	0.00573814
rs1375131	LDL	2	135954797	C	T	-0.0191	0.0017	28.5629	-0.012	0.0075	0.12	-0.0056	0.0049	0.2516	0.023	0.0286	0.4215	0.00344666	0.0171004
rs1375131	nonHDL	2	135954797	C	T	-0.0165	0.002	15.8003	-0.012	0.0075	0.12	-0.0056	0.0049	0.2516	0.023	0.0286	0.4215	0.00319067	0.0170988
rs1375131	TC	2	135954797	C	T	-0.0207	0.0016	37.5583	-0.012	0.0075	0.12	-0.0056	0.0049	0.2516	0.023	0.0286	0.4215	0.00318969	0.0170988
rs950176	TC	2	136898078	G	A	-0.0094	0.0014	10.7236	-0.0052	0.0073	0.48	0.0115	0.0043	0.007102	0.0218	0.0263	0.4071	0.00141866	0.0222383
rs35825582	TC	2	144248762	G	A	-0.0095	0.0012	14.6127	-0.011	0.0064	0.079	0.0058	0.0038	0.1265	-0.0273	0.0233	0.2408	0.000325053	0.0307748
rs6430090	logTG	2	146347459	A	G	-0.0107	0.0013	15.7305	-0.026	0.0065	8e-05	-0.013	0.0038	0.0007088	-0.0594	0.024	0.01319	0.560319	0.846572
rs12614487	LDL	2	158434569	C	T	-0.0282	0.0022	36.887	0.0029	0.012	0.81	-0.0169	0.0061	0.005351	0.0147	0.0437	0.736	0.0924367	1.77084e-06
rs10164853	nonHDL	2	158481992	A	G	-0.0301	0.0026	30.268	0.0067	0.012	0.58	-0.0173	0.0062	0.005421	0.0266	0.0438	0.5435	0.0902376	3.02819e-05
rs10164853	TC	2	158481992	A	G	-0.03	0.0021	45.5708	0.0067	0.012	0.58	-0.0173	0.0062	0.005421	0.0266	0.0438	0.5435	0.0874714	3.01367e-05
rs11900786	logTG	2	158508271	C	T	-0.0124	0.0018	11.25	-0.018	0.0095	0.052	-0.0094	0.0055	0.08752	0.0115	0.0352	0.7445	0.0204454	0.00214833
rs10170600	logTG	2	161118687	C	T	-0.0105	0.0014	13.1951	-0.047	0.0071	5.8e-11	-0.0133	0.0043	0.001776	0.0299	0.0254	0.239	0.125981	0.981457
rs2111485	TC	2	163110536	A	G	-0.0082	0.0013	9.54787	0.0007	0.0066	0.92	0.0199	0.0039	3.668e-07	0.0224	0.0235	0.3393	0.995079	0.0064262
rs10184004	LDL	2	165508389	C	T	-0.01	0.0013	13.8401	-0.059	0.0064	3.9e-20	-0.0218	0.004	5.455e-08	-0.0393	0.0234	0.09392	0.995337	0.995469
rs10184004	nonHDL	2	165508389	C	T	-0.0191	0.0016	32.1223	-0.059	0.0064	3.9e-20	-0.0218	0.004	5.455e-08	-0.0393	0.0234	0.09392	0.994603	0.996825
rs10184004	TC	2	165508389	C	T	-0.0084	0.0013	9.98446	-0.059	0.0064	3.9e-20	-0.0218	0.004	5.455e-08	-0.0393	0.0234	0.09392	0.994496	0.996039
rs13389219	logTG	2	165528876	C	T	-0.0325	0.0013	137.214	-0.061	0.0065	2e-20	-0.0215	0.004	7.797e-08	-0.0483	0.0234	0.03876	0.992163	0.996837
rs531328	logTG	2	169700838	C	A	-0.0092	0.0013	11.8315	-0.013	0.0067	0.064	-0.0059	0.0039	0.1315	-0.0166	0.0242	0.4937	0.00379211	0.0249987
rs10176901	LDL	2	169830661	G	A	-0.0212	0.0013	59.0604	0.017	0.0065	0.01	-0.0021	0.0038	0.5821	-0.0082	0.0234	0.7268	0.0020792	0.116034
rs28689500	TC	2	169831376	G	T	-0.0235	0.0012	84.6685	0.017	0.0065	0.01	-0.002	0.0038	0.594	-0.009	0.0235	0.7024	0.00171662	0.122712
rs66491446	nonHDL	2	169832362	G	A	-0.0226	0.0015	50.5714	0.017	0.0065	0.0086	-0.0021	0.0038	0.59	-0.0092	0.0236	0.6963	0.0017038	0.127369
rs1420377	logTG	2	171635168	G	A	-0.0088	0.0013	10.8878	-0.025	0.0066	0.00021	-0.0039	0.0039	0.3086	-0.0624	0.0241	0.009527	0.00263506	0.497409
rs4894128	logTG	2	180707310	T	C	-0.0094	0.0014	10.7236	-0.023	0.0069	0.00093	-0.0088	0.0043	0.03882	0.0074	0.0249	0.7647	0.0164969	0.524238
rs1155060	TC	2	191566439	G	A	-0.0082	0.0012	11.0811	0.0055	0.0066	0.41	-0.003	0.0038	0.4373	0.0127	0.0236	0.5895	0.00195126	0.000107989
rs2110690	logTG	2	202185132	G	A	-0.0091	0.0013	11.5918	-0.004	0.0063	0.53	-0.0061	0.0038	0.1067	0.0202	0.0231	0.3813	0.0300551	0.00567608
rs2349075	TC	2	202223566	G	A	-0.0077	0.0012	9.85608	-0.0029	0.0064	0.65	-0.0111	0.0039	0.004716	0.0013	0.0235	0.9575	0.090356	0.00512859
rs62189254	nonHDL	2	202314833	T	C	-0.0092	0.0015	9.06522	-0.0048	0.0064	0.46	-0.0034	0.0038	0.374	-0.0068	0.0236	0.7716	0.0128271	0.0122012
rs6435149	nonHDL	2	203271267	C	T	-0.0227	0.0017	39.9436	-0.017	0.0072	0.019	0.0031	0.0044	0.4854	0.0299	0.0263	0.2571	6.8352e-12	0.0247235
rs3731696	logTG	2	203431804	G	A	-0.0179	0.0019	20.3501	-0.041	0.0099	4e-05	-0.0066	0.006	0.2707	0.0628	0.0354	0.07568	1.91264e-11	0.8733
rs140974562	LDL	2	203460202	TGGCTCACGCCTGTA	T	-0.0224	0.0016	43.8072	na	na	na	-0.0228	0.0054	2.596e-05	na	na	na	2.71725e-13	0.00381469
rs113867238	TC	2	203495058	G	A	-0.0266	0.0014	79.7682	-0.012	0.0069	0.087	0.0229	0.0045	3.482e-07	0.0235	0.0251	0.3498	1.19887e-12	0.00443795
rs6740584	TC	2	208429351	T	C	-0.0098	0.0012	15.4989	0.0038	0.0061	0.54	0.0009	0.0039	0.8191	-0.0237	0.0233	0.3103	0.00152215	0.00570093
rs1250258	nonHDL	2	216300185	T	C	-0.0176	0.0017	24.3917	0.011	0.0071	0.14	0.0335	0.0047	5.9e-13	-0.0001	0.026	0.9962	0.990958	0.0160516
rs1250258	TC	2	216300185	T	C	-0.0164	0.0014	30.9678	0.011	0.0071	0.14	0.0335	0.0047	5.9e-13	-0.0001	0.026	0.9962	0.990338	0.0159921
rs1250259	LDL	2	216300482	A	T	-0.0171	0.0015	29.3787	0.011	0.0071	0.13	0.0337	0.0047	4.311e-13	0.0004	0.0262	0.9877	0.991173	0.0162276
rs10716631	LDL	2	219138170	T	G	-0.0102	0.0014	12.4949	na	na	na	-0.0037	0.0048	0.4424	na	na	na	0.0234822	0.163723
rs6707559	logTG	2	219142773	C	T	-0.009	0.0013	11.3546	-0.018	0.0064	0.006	-0.0111	0.0038	0.003138	-0.0159	0.0233	0.4957	0.0486082	0.199982
rs2382818	nonHDL	2	219155907	T	A	-0.0108	0.0015	12.2203	-0.017	0.0064	0.0079	-0.0105	0.0038	0.005666	-0.0091	0.0235	0.6967	0.0433077	0.198474
rs145013566	TC	2	219162720	C	CA	-0.0115	0.0014	15.6707	na	na	na	na	na	na	na	na	na	0.0386426	0.176942
rs78058190	LDL	2	219699999	A	G	-0.0241	0.0036	10.6646	-0.075	0.016	1.3e-06	-0.0528	0.0182	0.003623	0.0853	0.0669	0.2022	0.253618	0.999043
rs78058190	logTG	2	219699999	A	G	-0.0762	0.0035	104.364	-0.075	0.016	1.3e-06	-0.0528	0.0182	0.003623	0.0853	0.0669	0.2022	0.253905	0.999046
rs78058190	nonHDL	2	219699999	A	G	-0.0444	0.004	27.9016	-0.075	0.016	1.3e-06	-0.0528	0.0182	0.003623	0.0853	0.0669	0.2022	0.253906	0.999046
rs2203452	logTG	2	227094758	G	A	-0.0331	0.0013	142.279	-0.094	0.0066	1.5e-45	-0.0256	0.004	2.474e-10	-0.0141	0.024	0.5571	0.918769	0.973645
rs2138157	nonHDL	2	227103717	C	A	-0.0125	0.0016	14.2513	-0.093	0.0066	1e-44	-0.0227	0.0041	3.417e-08	-0.0126	0.024	0.6016	0.883013	0.967538
rs79639690	logTG	2	227605895	C	T	-0.018	0.0026	11.3546	-0.023	0.015	0.13	-0.0057	0.007	0.4107	-0.0747	0.0558	0.1808	0.00682682	0.0472763
rs116001967	nonHDL	2	228451050	G	A	-0.0507	0.0073	11.4226	-0.064	0.029	0.027	-0.0146	0.0219	0.5044	0.0635	0.1103	0.5649	0.00900911	0.168855
rs62192912	TC	2	234144942	T	C	-0.0109	0.0016	11.0181	0.015	0.0071	0.035	-0.0129	0.005	0.01084	-0.0017	0.0277	0.9511	0.0434135	0.0371745
rs17868301	logTG	2	234512095	T	C	-0.0168	0.0028	8.70483	0.011	0.013	0.39	-0.0167	0.0092	0.07112	0.0177	0.049	0.7178	0.0157996	0.00844291
rs35203651	LDL	2	234679549	C	T	-0.0241	0.0021	29.76	0.014	0.01	0.18	-0.012	0.0061	0.04747	-0.0082	0.0375	0.8279	0.0133181	0.0172314
rs35203651	nonHDL	2	234679549	C	T	-0.0285	0.0024	31.7969	0.014	0.01	0.18	-0.012	0.0061	0.04747	-0.0082	0.0375	0.8279	0.00450693	0.739087
rs35203651	TC	2	234679549	C	T	-0.0271	0.002	41.1011	0.014	0.01	0.18	-0.012	0.0061	0.04747	-0.0082	0.0375	0.8279	0.00277438	0.746217
rs7639927	logTG	3	4762734	T	A	-0.0113	0.0013	17.4496	0.0025	0.0063	0.69	-0.0033	0.0039	0.3989	0.0197	0.0237	0.4048	0.00141704	0.005238
rs62246311	logTG	3	9498143	A	G	-0.015	0.0022	11.0353	-0.047	0.011	8.5e-06	-0.0096	0.0069	0.16	-0.0003	0.0371	0.9942	0.00670589	0.948076
rs138426171	nonHDL	3	11886116	C	T	-0.0753	0.0126	8.64127	-0.011	0.047	0.81	0.1132	0.0402	0.004892	-0.0015	0.1762	0.9932	0.387788	0.0287274
rs1584063	TC	3	12266855	G	A	-0.0223	0.0012	76.3581	-0.03	0.0064	3e-06	-0.0142	0.0037	0.0001476	0.015	0.0232	0.5182	0.614418	4.8101e-19
rs13076933	LDL	3	12327431	T	G	-0.0246	0.0015	59.7184	0.0031	0.0073	0.67	-0.0153	0.0049	0.001696	0.0124	0.0271	0.6483	0.17763	1.03832e-23
rs7638903	logTG	3	12383714	G	A	-0.0254	0.0019	40.0339	-0.1	0.0098	4.4e-25	-0.0099	0.0057	0.08258	-0.068	0.0345	0.04882	0.00702217	0.882329
rs1151996	nonHDL	3	12445807	A	C	-0.0193	0.0015	37.1591	-0.011	0.0067	0.097	-0.0135	0.0039	0.0004866	0	0.0239	0.9996	0.338059	1.70041e-22
rs113223234	TC	3	12793024	G	A	-0.0204	0.0022	19.7413	0.0016	0.011	0.88	-0.0032	0.0072	0.6514	-0.0056	0.0402	0.8885	0.00645991	0.00820356
rs2305398	LDL	3	12856856	A	G	-0.0085	0.0013	10.2065	-0.023	0.0065	0.00049	-0.009	0.0039	0.02181	-0.0277	0.0234	0.2368	0.00277484	0.00204237
rs11128749	logTG	3	15667215	A	C	-0.0078	0.0013	8.70483	-0.029	0.0066	1.4e-05	-0.0093	0.0039	0.01732	-0.0381	0.0241	0.1144	0.00460672	0.893838
rs11717397	logTG	3	23368583	A	G	-0.0089	0.0013	11.12	-0.0003	0.0063	0.96	0.0006	0.0037	0.8633	-0.0088	0.0234	0.7058	0.00161212	4.43387e-08
rs6792725	LDL	3	24520283	A	G	-0.0145	0.0014	24.4107	-0.0072	0.0069	0.3	0.0022	0.0043	0.6046	0.0003	0.0264	0.9911	0.00175455	0.00861423
rs6792725	logTG	3	24520283	A	G	-0.0159	0.0014	29.1653	-0.0072	0.0069	0.3	0.0022	0.0043	0.6046	0.0003	0.0264	0.9911	0.00175455	0.00861496
rs6792725	nonHDL	3	24520283	A	G	-0.0187	0.0017	27.4178	-0.0072	0.0069	0.3	0.0022	0.0043	0.6046	0.0003	0.0264	0.9911	0.00175455	0.00861588
rs6792725	TC	3	24520283	A	G	-0.0171	0.0014	33.5837	-0.0072	0.0069	0.3	0.0022	0.0043	0.6046	0.0003	0.0264	0.9911	0.00175455	0.00861423
rs9837622	nonHDL	3	32514647	T	A	-0.034	0.0028	33.2034	-0.0039	0.012	0.75	-0.0234	0.0069	0.0007159	-0.0154	0.0441	0.7268	0.462699	0.00876475
rs7640978	LDL	3	32533010	C	T	-0.0309	0.0021	48.2824	-0.0006	0.011	0.96	-0.0217	0.0062	0.0004989	-0.0076	0.0405	0.852	0.461732	0.00840974
rs7640978	TC	3	32533010	C	T	-0.0294	0.0021	43.8072	-0.0006	0.011	0.96	-0.0217	0.0062	0.0004989	-0.0076	0.0405	0.852	0.639411	0.00868572
rs9831084	logTG	3	37025661	T	C	-0.0105	0.0013	15.1777	-0.015	0.0064	0.019	0.0012	0.0039	0.7488	-0.0258	0.0232	0.2661	0.00161711	0.0969946
rs140444852	TC	3	47955346	GT	G	-0.0426	0.0056	13.5525	na	na	na	0.0033	0.0223	0.8811	na	na	na	0.00632871	0.00788833
rs4955411	logTG	3	49145304	G	A	-0.0141	0.0015	20.2631	-0.02	0.0076	0.0093	0.0125	0.0047	0.007818	0.0137	0.0271	0.6142	3.96351e-05	0.141454
rs6446202	TC	3	50219991	C	G	-0.0134	0.0018	13.0116	0.026	0.011	0.015	0.0004	0.0055	0.9396	-0.0008	0.0369	0.9821	0.00453344	0.484752
rs2073499	nonHDL	3	50374293	A	G	-0.014	0.002	11.5918	0.015	0.0095	0.11	0.0043	0.0047	0.3524	0.016	0.033	0.6279	0.00341132	0.0318156
rs56208706	TC	3	52063885	C	T	-0.0294	0.0051	8.08724	0.029	0.027	0.28	na	na	na	-0.0695	0.1036	0.5024	0.0109027	0.0337172
rs17052061	logTG	3	52346240	T	G	-0.0183	0.0017	26.2965	-0.015	0.0085	0.074	-0.0022	0.0051	0.6585	-0.0342	0.0303	0.2582	0.00281492	0.0511311
rs13621	LDL	3	52558133	C	T	-0.0108	0.0013	16.0106	0.003	0.0064	0.64	-0.0135	0.0037	0.0002509	0.0666	0.0231	0.00386	0.785504	0.00574986
rs7638808	TC	3	52572056	G	A	-0.0095	0.0012	14.6127	0.0043	0.0063	0.5	-0.011	0.0037	0.002659	0.0651	0.0229	0.004481	0.590105	0.00552718
rs2251219	nonHDL	3	52584787	C	T	-0.0097	0.0015	9.99918	-0.0037	0.0064	0.57	-0.0159	0.0038	2.888e-05	0.0568	0.0234	0.01521	0.837481	0.00705193
rs28879486	logTG	3	57533658	C	T	-0.0114	0.0017	10.6986	0.0061	0.0083	0.46	-0.005	0.0051	0.3281	0.0005	0.0305	0.9868	0.00358178	0.00688472
rs9844432	LDL	3	58391293	C	G	-0.037	0.0024	52.898	0.0039	0.012	0.74	-0.0177	0.0073	0.01493	-0.0433	0.0415	0.2966	0.0413184	0.00631899
rs9844432	nonHDL	3	58391293	C	G	-0.0374	0.0028	39.9681	0.0039	0.012	0.74	-0.0177	0.0073	0.01493	-0.0433	0.0415	0.2966	0.0478031	0.0065449
rs9844432	TC	3	58391293	C	G	-0.0364	0.0023	55.6869	0.0039	0.012	0.74	-0.0177	0.0073	0.01493	-0.0433	0.0415	0.2966	0.0413284	0.00628991
rs10049466	logTG	3	66868609	T	C	-0.01	0.0014	12.039	-0.0098	0.007	0.16	-0.0033	0.004	0.4192	0.0176	0.0254	0.4887	0.00232778	0.00214096
rs9834743	LDL	3	69837571	G	C	-0.0122	0.0013	20.1997	-0.0055	0.0066	0.41	0.0166	0.0041	5.063e-05	-0.0183	0.0241	0.4469	0.767759	0.00560717
rs9834743	nonHDL	3	69837571	G	C	-0.0166	0.0015	27.7398	-0.0055	0.0066	0.41	0.0166	0.0041	5.063e-05	-0.0183	0.0241	0.4469	0.828011	0.00572869
rs9834743	TC	3	69837571	G	C	-0.0136	0.0013	24.887	-0.0055	0.0066	0.41	0.0166	0.0041	5.063e-05	-0.0183	0.0241	0.4469	0.758446	0.00541947
rs1529585	logTG	3	69870595	G	A	-0.009	0.0013	11.3546	-0.022	0.0064	0.00067	0.0036	0.0041	0.3788	-0.0088	0.0236	0.7111	0.00185324	0.681316
rs13066793	logTG	3	87037543	A	G	-0.0169	0.0023	12.6958	-0.03	0.011	0.0083	0.0172	0.0075	0.02094	-0.0749	0.0449	0.09505	0.0400798	0.185889
rs3796276	LDL	3	100465609	A	G	-0.0086	0.0014	9.09125	0.0081	0.0066	0.22	-0.0009	0.0041	0.8288	0.0326	0.0247	0.1862	0.00162709	0.0108416
rs3732356	TC	3	119529113	G	T	-0.0303	0.0022	42.4296	-0.0033	0.013	0.8	0.0088	0.007	0.2063	-0.0327	0.0458	0.4751	0.0823441	0.0091284
rs3732359	LDL	3	119536429	G	A	-0.0131	0.0014	20.0866	0.017	0.0075	0.021	0.0097	0.0041	0.01976	0.015	0.0271	0.5798	0.443391	0.0626132
rs3732359	nonHDL	3	119536429	G	A	-0.0133	0.0017	14.2894	0.017	0.0075	0.021	0.0097	0.0041	0.01976	0.015	0.0271	0.5798	0.469622	0.0508139
rs68028452	LDL	3	122285218	C	CT	-0.0189	0.0015	35.6754	na	na	na	0.0042	0.0052	0.4202	na	na	na	0.00313987	0.268486
rs68028452	nonHDL	3	122285218	C	CT	-0.0173	0.0017	23.5976	na	na	na	0.0042	0.0052	0.4202	na	na	na	0.00345666	0.314059
rs68028452	TC	3	122285218	C	CT	-0.0165	0.0014	31.3349	na	na	na	0.0042	0.0052	0.4202	na	na	na	0.00403842	0.382321
rs11719201	LDL	3	123068744	C	T	-0.0099	0.0015	10.386	-0.088	0.0076	1.1e-30	-0.0154	0.0047	0.001107	0.0066	0.0273	0.8078	0.232948	0.992187
rs11719201	TC	3	123068744	C	T	-0.014	0.0015	19.9889	-0.088	0.0076	1.1e-30	-0.0154	0.0047	0.001107	0.0066	0.0273	0.8078	0.272933	0.998975
rs2011442	LDL	3	124959834	T	C	-0.0109	0.0013	16.2934	0.013	0.0067	0.049	0.0005	0.004	0.9074	0.0059	0.0248	0.8122	0.00180384	2.80514e-05
rs2011442	TC	3	124959834	T	C	-0.0113	0.0013	17.4496	0.013	0.0067	0.049	0.0005	0.004	0.9074	0.0059	0.0248	0.8122	0.00199222	3.80624e-05
rs9862203	TC	3	126058362	G	A	-0.0125	0.0014	18.365	-0.014	0.0074	0.064	-0.0132	0.0043	0.001985	0.0238	0.0273	0.3823	0.154314	0.0259977
rs7641302	LDL	3	126060315	C	T	-0.0136	0.0015	18.9111	-0.014	0.0075	0.066	-0.013	0.0043	0.002586	0.0226	0.0274	0.4081	0.151406	0.0259474
rs12489933	LDL	3	127281890	A	G	-0.0125	0.0019	10.3244	-0.0076	0.01	0.45	0	0.0058	0.9958	-0.0188	0.0376	0.6176	0.00238023	0.0087036
rs62264113	TC	3	127292333	A	G	-0.0121	0.0018	10.7472	-0.0068	0.01	0.5	-0.002	0.0058	0.7261	-0.0489	0.0375	0.1923	0.00221133	0.00919028
rs56203737	LDL	3	129274936	G	A	-0.0178	0.0019	20.133	0.0078	0.0098	0.42	-0.0033	0.0058	0.566	-0.0361	0.0344	0.2931	0.00102907	8.42077e-05
rs56299595	TC	3	129278182	G	A	-0.0111	0.0017	10.1803	0.0078	0.0097	0.42	-0.0007	0.005	0.892	-0.0536	0.0341	0.1156	0.000764702	8.60979e-05
rs115771255	nonHDL	3	132119691	A	T	-0.0331	0.0027	33.8243	-0.007	0.011	0.52	-0.0246	0.0076	0.001284	-0.0407	0.0387	0.2927	0.294449	0.00989582
rs74341202	LDL	3	132183991	G	A	-0.0425	0.0031	42.0513	-0.011	0.015	0.47	-0.0035	0.0096	0.7161	0.0013	0.056	0.9819	0.0061946	0.0132582
rs74341202	TC	3	132183991	G	A	-0.0444	0.003	48.8342	-0.011	0.015	0.47	-0.0035	0.0096	0.7161	0.0013	0.056	0.9819	0.00363642	0.0132281
rs6794370	LDL	3	133490334	A	C	-0.011	0.0017	10.0105	na	na	na	0.0057	0.0053	0.2842	na	na	na	0.00367924	0.00576858
rs6794370	TC	3	133490334	A	C	-0.0129	0.0016	15.1264	na	na	na	0.0057	0.0053	0.2842	na	na	na	0.00369219	0.0058542
rs687339	nonHDL	3	135932359	T	C	-0.0187	0.0018	24.5551	-0.035	0.0076	4.7e-06	-0.038	0.0045	3.156e-17	-0.0838	0.0275	0.002314	0.964163	0.95609
rs684773	logTG	3	135956305	C	A	-0.0243	0.0016	51.3686	-0.036	0.0076	3.1e-06	-0.0441	0.0051	3.641e-18	-0.0771	0.0276	0.005158	0.993729	0.865467
rs1711171	LDL	3	136020541	C	T	-0.0121	0.0015	15.1412	-0.038	0.0074	3.1e-07	-0.0383	0.0045	7.739e-18	-0.076	0.027	0.004871	0.980405	0.97517
rs6771713	TC	3	136450593	T	C	-0.0098	0.0014	11.5918	-0.02	0.0068	0.0035	-0.021	0.0045	2.966e-06	-0.0735	0.0245	0.002668	0.000674718	0.0909031
rs111834982	nonHDL	3	142019751	A	G	-0.0146	0.0022	10.4928	-0.017	0.0095	0.072	0.0101	0.0056	0.0713	-0.0174	0.0345	0.6146	0.0166494	0.0271334
rs73238159	logTG	3	142078759	C	T	-0.0142	0.0019	13.108	-0.017	0.0096	0.079	0.0095	0.0056	0.08923	-0.0187	0.0339	0.5821	0.0154624	0.0279837
rs73238159	TC	3	142078759	C	T	-0.0157	0.0019	15.8481	-0.017	0.0096	0.079	0.0095	0.0056	0.08923	-0.0187	0.0339	0.5821	0.0169502	0.0265536
rs11711179	LDL	3	142159885	G	A	-0.0128	0.0019	10.7908	-0.016	0.0095	0.097	0.0107	0.0056	0.05645	-0.0234	0.0339	0.4897	0.0207251	0.0248045
rs9832727	nonHDL	3	142649110	C	G	-0.0155	0.0016	21.4675	-0.0057	0.0072	0.43	-0.0093	0.0042	0.02682	-0.0086	0.0241	0.7231	0.161634	0.0288931
rs9832727	TC	3	142649110	C	G	-0.0144	0.0013	27.7895	-0.0057	0.0072	0.43	-0.0093	0.0042	0.02682	-0.0086	0.0241	0.7231	0.0581075	0.00670508
rs9653945	LDL	3	142660706	G	A	-0.0121	0.0014	17.261	-0.0035	0.0066	0.6	-0.0137	0.0042	0.0009716	0.0005	0.0241	0.9825	0.057992	0.0200265
rs9653945	logTG	3	142660706	G	A	-0.0121	0.0013	19.8839	-0.0035	0.0066	0.6	-0.0137	0.0042	0.0009716	0.0005	0.0241	0.9825	0.2045	0.00820809
rs143201630	TC	3	145924454	C	A	-0.0685	0.0098	11.5602	0.029	0.041	0.49	na	na	na	0.0325	0.1511	0.8297	0.0175298	0.0330319
rs884370	nonHDL	3	147076791	T	G	-0.0126	0.0017	12.9044	0.0039	0.0075	0.61	-0.0061	0.0044	0.1715	0.0091	0.0264	0.7311	0.0043058	0.0063645
rs884370	TC	3	147076791	T	G	-0.0101	0.0014	12.2659	0.0039	0.0075	0.61	-0.0061	0.0044	0.1715	0.0091	0.0264	0.7311	0.00427942	0.00633153
rs62271373	logTG	3	150066540	A	T	-0.0351	0.003	30.8946	-0.088	0.014	1e-09	-0.0481	0.0096	5.537e-07	-0.0326	0.0511	0.5235	0.998854	0.999936
rs439765	nonHDL	3	155532694	T	A	-0.0133	0.0017	14.2894	0.0032	0.0073	0.66	-0.0118	0.0044	0.006815	0.0317	0.0263	0.2273	0.0567742	0.00609005
rs6787781	logTG	3	155535351	C	G	-0.0115	0.0014	15.6707	0.0027	0.0071	0.71	-0.0083	0.0041	0.04053	0.0298	0.0256	0.2432	0.0170739	0.00571766
rs76440173	LDL	3	155546124	T	C	-0.0793	0.0109	12.4611	0.067	0.057	0.24	0.0159	0.0427	0.7095	0.1688	0.1987	0.3956	0.0183706	0.0530505
rs407258	TC	3	155560978	C	T	-0.0116	0.0014	15.9303	0.0033	0.0073	0.65	-0.0116	0.0044	0.008294	0.0358	0.0264	0.1744	0.0547636	0.0091908
rs67261871	logTG	3	156797941	T	C	-0.0178	0.0013	41.9474	0.014	0.0065	0.034	-0.0063	0.0038	0.0952	0.0276	0.0235	0.2407	6.87074e-07	0.0387581
rs4679881	LDL	3	160028014	T	C	-0.0128	0.0013	22.1474	-0.024	0.0064	0.00022	0.0028	0.0039	0.4618	0.0326	0.0233	0.1616	0.00190881	0.792461
rs55687857	TC	3	160029964	G	C	-0.0153	0.0012	36.5062	-0.024	0.0064	0.00022	0.0028	0.0039	0.4619	0.0326	0.0233	0.1623	0.00191526	0.791383
rs60009222	nonHDL	3	160063356	A	C	-0.0122	0.0015	15.3792	-0.024	0.0064	0.00023	0.0026	0.0038	0.4953	0.0342	0.0232	0.1405	0.00188695	0.794179
rs10513688	TC	3	170727218	A	G	-0.0172	0.002	17.0985	0.043	0.011	7.6e-05	-0.0075	0.006	0.2058	-0.1012	0.0382	0.008097	0.00390629	1.8112e-12
rs5400	logTG	3	170732300	A	G	-0.0216	0.0018	32.4494	0.049	0.0096	3.5e-07	-0.0004	0.0054	0.9471	-0.0958	0.0338	0.004572	0.00190237	2.90501e-11
rs11711206	nonHDL	3	170732945	G	A	-0.0184	0.0026	11.8315	0.043	0.011	7.9e-05	-0.0082	0.0062	0.1852	-0.1025	0.0382	0.007316	0.00387624	3.75789e-09
rs57005472	LDL	3	170758329	G	T	-0.0144	0.0023	9.41699	0.031	0.012	0.009	-0.0116	0.0067	0.08448	-0.117	0.0427	0.006195	0.00465933	1.42933e-07
rs4515081	LDL	3	171536255	G	T	-0.0131	0.0017	13.8862	-0.0079	0.0088	0.37	0.0045	0.0051	0.3763	0.0067	0.0304	0.826	0.00273546	0.00857795
rs79287178	logTG	3	172294500	A	G	-0.06	0.0041	47.7693	-0.011	0.019	0.56	-0.0086	0.014	0.5377	-0.0255	0.0752	0.7347	0.00605607	0.0155667
rs9844949	TC	3	185820283	G	A	-0.0182	0.0018	23.307	-0.027	0.0095	0.0043	-0.0065	0.0058	0.257	-0.034	0.0343	0.3211	0.00399596	0.220361
rs397726270	LDL	3	195942080	T	TG	-0.0105	0.0015	11.5918	na	na	na	na	na	na	na	na	na	0.00973945	0.0180761
rs397726270	TC	3	195942080	T	TG	-0.0095	0.0015	9.61993	na	na	na	na	na	na	na	na	na	0.00770543	0.0140462
rs34311866	logTG	4	951947	C	T	-0.0175	0.0017	24.1255	-0.024	0.0085	0.0045	-0.0119	0.005	0.01789	-0.0312	0.0299	0.2969	0.030047	0.147579
rs13101828	nonHDL	4	965720	A	G	-0.0108	0.0015	12.2203	0.0022	0.0065	0.74	-0.0125	0.0038	0.001098	0.0121	0.0231	0.5999	0.220578	0.00250758
rs3775067	logTG	4	2888622	A	G	-0.0113	0.0013	17.4496	-0.023	0.0065	0.00049	-0.0145	0.0038	0.0001637	-0.0376	0.0239	0.1147	0.60142	0.586237
rs3775067	nonHDL	4	2888622	A	G	-0.0095	0.0015	9.61993	-0.023	0.0065	0.00049	-0.0145	0.0038	0.0001637	-0.0376	0.0239	0.1147	0.454628	0.972015
rs13108218	LDL	4	3443931	A	G	-0.0178	0.0013	41.9474	-0.0097	0.0067	0.15	-0.0235	0.0039	1.316e-09	-0.0319	0.0239	0.1806	0.202188	0.00347362
rs13108218	logTG	4	3443931	A	G	-0.0273	0.0013	97.1832	-0.0097	0.0067	0.15	-0.0235	0.0039	1.316e-09	-0.0319	0.0239	0.1806	0.201799	0.00347352
rs13108218	nonHDL	4	3443931	A	G	-0.0262	0.0015	67.5899	-0.0097	0.0067	0.15	-0.0235	0.0039	1.316e-09	-0.0319	0.0239	0.1806	0.201799	0.00347364
rs13108218	TC	4	3443931	A	G	-0.0244	0.0013	77.8702	-0.0097	0.0067	0.15	-0.0235	0.0039	1.316e-09	-0.0319	0.0239	0.1806	0.199517	0.0034735
rs4450871	logTG	4	4990298	A	G	-0.0139	0.0014	22.5049	-0.015	0.0065	0.022	-0.0065	0.0045	0.1502	-0.0299	0.0258	0.2466	0.00452889	0.0546262
rs4234798	nonHDL	4	7219933	G	T	-0.0113	0.0015	13.3057	-0.0093	0.0066	0.16	-0.0046	0.0038	0.2303	-0.0043	0.0235	0.8559	0.00292562	0.0147836
rs4689088	LDL	4	7222253	A	G	-0.0112	0.0013	17.1567	-0.012	0.0066	0.069	-0.0045	0.0038	0.2438	-0.0041	0.0238	0.8637	0.00288272	0.0184056
rs4689653	TC	4	7223319	G	T	-0.0103	0.0012	17.0354	-0.011	0.0066	0.092	-0.0039	0.0039	0.3059	-0.0056	0.0239	0.8156	0.00284752	0.0142015
rs62409270	LDL	4	15028043	C	G	-0.0091	0.0014	10.0952	-0.015	0.0066	0.021	-0.0042	0.0042	0.3208	-0.0006	0.0241	0.9796	0.00241362	0.0590861
rs7700107	nonHDL	4	17880416	C	A	-0.0148	0.0021	11.7399	-0.021	0.0096	0.032	-0.0138	0.0052	0.00842	-0.0375	0.0337	0.2655	0.0506798	0.00074018
rs16895971	logTG	4	17884986	C	T	-0.0217	0.0018	32.7416	-0.021	0.0096	0.027	-0.014	0.0052	0.007277	-0.0367	0.0338	0.277	0.0626724	0.000826811
rs73243877	logTG	4	26047616	G	A	-0.0216	0.0018	32.4494	-0.0025	0.0087	0.77	0	0.0056	0.9986	0.0158	0.0307	0.6072	0.00241336	0.00640277
rs6448432	nonHDL	4	26098810	A	G	-0.011	0.0017	10.0105	-0.017	0.0071	0.018	0.0037	0.0043	0.3877	0.016	0.0252	0.5237	0.00234424	0.0746434
rs3912391	logTG	4	39698824	G	A	-0.0078	0.0012	10.0952	0.0002	0.0063	0.97	-0.0014	0.0038	0.7069	-0.0273	0.023	0.2345	0.00158752	0.00471133
rs17083112	LDL	4	54453676	T	C	-0.0127	0.0018	11.7647	-0.0049	0.009	0.58	-0.0097	0.0051	0.05771	0.0153	0.0324	0.6368	0.0175515	0.00791031
rs35484700	logTG	4	55498781	CG	C	-0.0095	0.0013	12.5658	na	na	na	0.0148	0.0043	0.0006346	na	na	na	0.970144	0.0048499
rs4860987	LDL	4	69491284	T	A	-0.031	0.0018	65.7425	0.0063	0.008	0.43	-0.0264	0.0057	4.556e-06	-0.0106	0.0282	0.7064	0.866998	0.0077854
rs4860987	nonHDL	4	69491284	T	A	-0.0329	0.0021	54.5924	0.0063	0.008	0.43	-0.0264	0.0057	4.556e-06	-0.0106	0.0282	0.7064	0.866998	0.0077854
rs4860987	TC	4	69491284	T	A	-0.0386	0.0017	113.407	0.0063	0.008	0.43	-0.0264	0.0057	4.556e-06	-0.0106	0.0282	0.7064	0.887481	0.0074256
rs293435	logTG	4	69588052	T	C	-0.0154	0.0014	27.4178	-0.0061	0.0071	0.39	-0.0098	0.004	0.01451	-0.041	0.0254	0.1068	0.0153294	0.011411
rs183970949	TC	4	70117093	C	T	-0.0832	0.0099	16.3651	0.11	0.047	0.019	-0.0039	0.0428	0.9281	0.0867	0.1547	0.5754	0.015002	0.259388
rs187479321	LDL	4	70264840	A	G	-0.084	0.011	13.6508	0.12	0.048	0.016	-0.0114	0.0536	0.8316	0.1206	0.1566	0.4413	0.0193207	0.259654
rs187479321	nonHDL	4	70264840	A	G	-0.0887	0.0126	11.7152	0.12	0.048	0.016	-0.0114	0.0536	0.8316	0.1206	0.1566	0.4413	0.0193206	0.259635
rs142641018	nonHDL	4	71297926	T	C	-0.1119	0.0175	9.79237	-0.12	0.063	0.051	na	na	na	0.1557	0.3	0.6037	0.00051763	0.0932296
rs368790862	nonHDL	4	71820941	A	G	-0.1113	0.0193	8.09274	-0.17	0.079	0.034	na	na	na	-0.5805	0.3666	0.1134	0.000974824	0.158834
rs938075289	LDL	4	72754788	C	A	-0.3237	0.0232	43.518	-0.24	0.11	0.041	na	na	na	1.2389	0.9738	0.2033	0.000905917	0.142831
rs938075289	nonHDL	4	72754788	C	A	-0.3079	0.0236	38.1776	-0.24	0.11	0.041	na	na	na	1.2389	0.9738	0.2033	0.0016842	0.142821
rs938075289	TC	4	72754788	C	A	-0.364	0.0225	58.1405	-0.24	0.11	0.041	na	na	na	1.2389	0.9738	0.2033	0.000757129	0.142822
rs537526354	LDL	4	73491622	A	G	-0.3994	0.0217	74.9258	-0.19	0.11	0.084	na	na	na	0.5726	0.8062	0.4776	0.000808521	0.0912979
rs537526354	nonHDL	4	73491622	A	G	-0.4009	0.0223	71.5347	-0.19	0.11	0.084	na	na	na	0.5726	0.8062	0.4776	0.000874325	0.0913843
rs537526354	TC	4	73491622	A	G	-0.4593	0.0212	103.359	-0.19	0.11	0.084	na	na	na	0.5726	0.8062	0.4776	0.0012829	0.0913668
rs187918276	LDL	4	74033564	C	G	-0.467	0.0216	102.937	-0.23	0.11	0.044	na	na	na	1.159	0.6803	0.08845	0.00893518	0.160366
rs573930512	logTG	4	74512280	A	G	-0.1562	0.0208	13.2269	-0.2	0.1	0.055	na	na	na	1.0372	0.632	0.1008	0.000579799	0.105579
rs573930512	nonHDL	4	74512280	A	G	-0.4507	0.0218	94.2291	-0.2	0.1	0.055	na	na	na	1.0372	0.632	0.1008	0.00722409	0.105579
rs573930512	TC	4	74512280	A	G	-0.5122	0.0206	135.74	-0.2	0.1	0.055	na	na	na	1.0372	0.632	0.1008	0.00728571	0.105572
rs181372486	LDL	4	74793806	A	G	-0.3421	0.0202	63.6097	-0.15	0.097	0.13	na	na	na	0.4899	0.5566	0.3788	0.0135165	0.0711901
rs190217562	TC	4	75180409	C	T	-0.0892	0.0102	17.652	-0.082	0.046	0.076	na	na	na	0.2162	0.1884	0.2513	0.000683302	0.0581552
rs189087436	LDL	4	75416194	C	T	-0.2327	0.0196	31.7836	-0.18	0.1	0.068	na	na	na	-0.8	0.6097	0.1895	0.0277998	0.115405
rs77021821	nonHDL	4	75684215	T	C	-0.037	0.0076	5.94887	0.044	0.03	0.15	0.0272	0.0322	0.398	0.0702	0.1225	0.5667	0.0196984	0.0424906
rs77021821	TC	4	75684215	T	C	-0.0299	0.0064	5.52511	0.044	0.03	0.15	0.0272	0.0322	0.398	0.0702	0.1225	0.5667	0.0167281	0.0566264
rs7662940	TC	4	76650443	T	C	-0.0165	0.0019	17.4186	-0.02	0.0097	0.037	-0.0007	0.006	0.9022	-0.0168	0.0342	0.6232	0.00216177	0.0518257
rs324682	nonHDL	4	76740008	A	G	-0.014	0.0023	8.93901	-0.017	0.0096	0.069	-0.0034	0.0059	0.5672	-0.0041	0.0336	0.9041	0.00237047	0.0437013
rs4493564	LDL	4	77420407	A	G	-0.0101	0.0013	14.1026	0.011	0.0067	0.11	-0.0147	0.0038	0.0001005	-0.0079	0.024	0.7436	0.862197	0.0042696
rs28687959	logTG	4	77421345	T	C	-0.01	0.0012	16.1046	-0.0079	0.0064	0.22	0.0081	0.0037	0.02961	-0.0039	0.0231	0.8673	0.0520063	0.00204344
rs71607360	TC	4	77439399	A	C	-0.0141	0.0021	10.7236	0.0089	0.011	0.44	-0.0162	0.0064	0.01104	-0.0225	0.0405	0.5787	0.0396087	0.000625057
rs72663972	logTG	4	87294293	A	C	-0.0143	0.0013	27.4178	-0.0015	0.0066	0.82	-0.0012	0.004	0.7583	-0.0273	0.0242	0.2594	0.00163579	0.00519795
rs3775228	nonHDL	4	87985166	T	C	-0.0178	0.0015	31.7536	0.0057	0.0065	0.38	-0.0035	0.0039	0.3749	0.0226	0.0237	0.3388	0.00224934	0.00705457
rs17605615	TC	4	87996745	A	G	-0.0122	0.0012	23.5539	0.0059	0.0065	0.37	-0.0047	0.0038	0.222	0.0165	0.0234	0.4796	0.00300161	0.00698869
rs342467	LDL	4	88052219	C	T	-0.0089	0.0013	11.12	0.0069	0.0064	0.28	-0.0004	0.0037	0.9199	0.0214	0.0236	0.3647	0.00229877	0.00732403
rs342466	logTG	4	88053085	T	C	-0.027	0.0013	95.0853	0.0065	0.0064	0.31	-0.0005	0.0038	0.8886	0.022	0.0236	0.3499	0.0015774	0.00937882
rs10012528	logTG	4	89724963	G	C	-0.0125	0.0012	24.6817	-0.034	0.0063	7.5e-08	-0.013	0.0037	0.0004367	-0.0024	0.0233	0.9183	0.667389	0.962606
rs144198753	LDL	4	99713350	C	T	-0.0568	0.0071	14.9051	-0.12	0.034	0.0003	-0.0569	0.02	0.004342	-0.0067	0.113	0.9525	0.260126	0.906879
rs144198753	TC	4	99713350	C	T	-0.0472	0.0068	11.4102	-0.12	0.034	0.0003	-0.0569	0.02	0.004342	-0.0067	0.113	0.9525	0.257222	0.909489
rs1126673	logTG	4	100045616	T	C	-0.0139	0.0014	22.5049	0.0007	0.0069	0.92	0.0042	0.0044	0.331	-0.0025	0.0247	0.9192	0.00234	0.00521188
rs1229984	nonHDL	4	100239319	C	T	-0.0266	0.0038	11.5918	-0.068	0.021	0.00094	na	na	na	-0.1689	0.0667	0.01129	0.00755725	0.729888
rs9307240	LDL	4	100488580	G	C	-0.0164	0.0014	30.9678	-0.024	0.0073	0.00094	-0.015	0.0043	0.0004428	-0.0585	0.0261	0.02532	0.433968	0.45395
rs1800804	TC	4	100495817	T	C	-0.0157	0.0014	28.4597	-0.024	0.0072	0.00088	-0.015	0.0042	0.0004067	-0.0584	0.0261	0.02548	0.427355	0.445482
rs13107325	LDL	4	103188709	C	T	-0.0253	0.0027	20.141	0.048	0.013	0.00033	0.0011	0.008	0.8876	0.1603	0.0429	0.0001845	0.00315758	0.841813
rs13107325	logTG	4	103188709	T	C	-0.0365	0.0027	40.9151	-0.048	0.013	0.00033	-0.0011	0.008	0.8876	-0.1603	0.0429	0.0001845	0.00315758	0.841813
rs13107325	TC	4	103188709	C	T	-0.039	0.0026	50.1342	0.048	0.013	0.00033	0.0011	0.008	0.8876	0.1603	0.0429	0.0001845	0.00315758	0.841813
rs10017313	logTG	4	103861380	A	G	-0.0107	0.0013	15.7305	-0.035	0.0064	4.3e-08	0.0047	0.0037	0.2049	-0.0309	0.0231	0.1812	0.00463463	0.766275
rs17617028	LDL	4	106064683	A	G	-0.0119	0.0015	14.6709	0.01	0.0077	0.18	-0.0042	0.0044	0.3383	0.0179	0.0277	0.5167	0.00227929	0.00419933
rs138307849	logTG	4	110095620	C	T	-0.1207	0.0092	38.5945	-0.082	0.043	0.053	-0.0374	0.028	0.1807	0.1837	0.1547	0.2351	0.0223977	0.120405
rs138307849	nonHDL	4	110095620	C	T	-0.0779	0.0109	12.0514	-0.082	0.043	0.053	-0.0374	0.028	0.1807	0.1837	0.1547	0.2351	0.0223976	0.120405
rs114816312	logTG	4	110638824	T	C	-0.1332	0.0089	49.9139	-0.06	0.042	0.15	-0.0398	0.0264	0.132	0.1742	0.159	0.2734	0.0290804	0.0635116
rs114816312	nonHDL	4	110638824	T	C	-0.0848	0.0108	14.3873	-0.06	0.042	0.15	-0.0398	0.0264	0.132	0.1742	0.159	0.2734	0.0351296	0.0587337
rs7699288	LDL	4	110942277	G	C	-0.0101	0.0014	12.2659	0.018	0.0069	0.011	-0.0031	0.0041	0.4476	0.0087	0.0248	0.7256	0.0018424	0.0669306
rs11729857	TC	4	120114100	C	G	-0.0137	0.0019	12.2539	0.0051	0.0094	0.59	0.0004	0.0062	0.9543	0.0395	0.0344	0.2512	2.00632e-06	0.00864858
rs71610255	LDL	4	120128060	A	C	-0.0141	0.002	11.7473	0.0055	0.0094	0.56	0.0015	0.0061	0.8004	0.0386	0.0344	0.262	0.000347402	0.00865848
rs192929239	logTG	4	124641827	G	A	-0.0459	0.0061	13.2767	0.0083	0.03	0.78	-0.0084	0.0199	0.6737	-0.0407	0.1038	0.6951	0.00799765	0.0232317
rs4435753	LDL	4	128662796	T	C	-0.0065	0.0013	6.24162	-0.011	0.0066	0.086	0.0047	0.0039	0.2303	-0.0202	0.024	0.3999	0.00355671	0.0177138
rs34659062	TC	4	128999619	T	C	-0.0088	0.0012	12.6488	-0.018	0.0066	0.007	0.0079	0.0039	0.04205	-0.0144	0.0239	0.5463	0.0984695	0.076955
rs7681503	logTG	4	141801478	T	C	-0.0092	0.0013	11.8315	-0.0024	0.0064	0.71	-0.0048	0.0038	0.2026	-0.0023	0.0239	0.9228	0.00371588	0.00520971
rs7696969	logTG	4	143326714	T	G	-0.0113	0.0013	17.4496	-0.0062	0.0065	0.34	-0.0051	0.0039	0.1909	-0.0502	0.0239	0.03558	0.00258729	0.00738236
rs2358183	logTG	4	148985862	C	T	-0.0104	0.0014	12.9595	0.0063	0.0074	0.4	0.0081	0.0043	0.06096	0.091	0.0265	0.0006069	0.0109448	0.00790306
rs2290846	TC	4	151199080	G	A	-0.0097	0.0014	11.3715	0.011	0.0071	0.12	-0.0064	0.0043	0.1403	0.0054	0.0257	0.8322	0.00432727	0.0271937
rs2085723	LDL	4	151206057	T	G	-0.0077	0.0013	8.50035	0.013	0.0066	0.058	-0.0039	0.0038	0.302	0.0082	0.0241	0.7341	0.00413741	0.0265612
rs41280463	LDL	4	154191226	G	A	-0.0145	0.0018	15.1017	0.016	0.0086	0.061	0.0015	0.0056	0.7862	-0.0415	0.0319	0.1931	0.00165399	0.0333247
rs41280463	nonHDL	4	154191226	G	A	-0.0175	0.0021	16.1046	0.016	0.0086	0.061	0.0015	0.0056	0.7862	-0.0415	0.0319	0.1931	0.00166914	0.0339834
rs41280463	TC	4	154191226	G	A	-0.019	0.0017	28.2744	0.016	0.0086	0.061	0.0015	0.0056	0.7862	-0.0415	0.0319	0.1931	0.00164468	0.0341095
rs6054	LDL	4	155489608	T	C	-0.1246	0.0108	30.0664	0.03	0.048	0.53	-0.0649	0.0415	0.1174	-0.0555	0.161	0.7303	0.0440661	0.0363076
rs6054	logTG	4	155489608	T	C	-0.116	0.0107	26.6581	0.03	0.048	0.53	-0.0649	0.0415	0.1174	-0.0555	0.161	0.7303	0.0440661	0.0363076
rs6054	nonHDL	4	155489608	T	C	-0.1585	0.012	39.1049	0.03	0.048	0.53	-0.0649	0.0415	0.1174	-0.0555	0.161	0.7303	0.0440685	0.0363105
rs6054	TC	4	155489608	T	C	-0.1438	0.0103	43.5702	0.03	0.048	0.53	-0.0649	0.0415	0.1174	-0.0555	0.161	0.7303	0.0440667	0.0363044
rs13108763	logTG	4	157697086	A	G	-0.0143	0.0013	27.4178	-0.036	0.0068	1.1e-07	-0.0131	0.0039	0.0008609	-0.053	0.0246	0.03097	0.20618	0.930907
rs72701754	LDL	4	185251995	T	A	-0.0082	0.0013	9.54787	-0.0029	0.0065	0.66	-0.0058	0.0038	0.1242	-0.0358	0.0244	0.1421	0.00968303	0.00528539
rs72701754	TC	4	185251995	T	A	-0.0091	0.0012	13.4726	-0.0029	0.0065	0.66	-0.0058	0.0038	0.1242	-0.0358	0.0244	0.1421	0.0112257	0.00518457
rs2221258	TC	5	39549119	A	G	-0.0107	0.0013	15.7305	0.0012	0.0067	0.86	0.0111	0.0039	0.004576	-0.0196	0.024	0.4135	0.0740604	0.0049749
rs115018790	nonHDL	5	52088271	G	A	-0.0394	0.0041	21.1383	0.053	0.016	0.0012	-0.0191	0.011	0.08395	-0.0531	0.0614	0.3877	0.00903369	0.000447415
rs116734477	LDL	5	52095024	C	T	-0.0518	0.0035	48.8342	0.054	0.016	0.00098	-0.0195	0.011	0.07777	-0.0528	0.0614	0.3902	6.23959e-05	0.000478961
rs116734477	TC	5	52095024	C	T	-0.0347	0.0034	23.729	0.054	0.016	0.00098	-0.0195	0.011	0.07777	-0.0528	0.0614	0.3902	6.21478e-05	0.000467445
rs79760705	nonHDL	5	53298716	T	G	-0.0212	0.0025	16.6474	-0.039	0.01	0.00013	-0.0408	0.0066	7.095e-10	-0.0512	0.0366	0.1612	0.994375	2.92952e-07
rs79760705	TC	5	53298716	T	G	-0.0143	0.0021	11.0091	-0.039	0.01	0.00013	-0.0408	0.0066	7.095e-10	-0.0512	0.0366	0.1612	0.993349	4.56679e-07
rs6889847	logTG	5	53303452	C	G	-0.0173	0.0014	34.3509	-0.053	0.0073	6.7e-13	-0.0172	0.0041	2.494e-05	-0.0344	0.0265	0.1937	0.747351	0.955044
rs13173241	LDL	5	55861359	A	G	-0.0151	0.0016	20.4182	-0.067	0.008	5.5e-17	-0.022	0.0047	2.843e-06	-0.0441	0.0284	0.12	0.315134	0.000214699
rs13173241	logTG	5	55861359	A	G	-0.0353	0.0016	107.14	-0.067	0.008	5.5e-17	-0.022	0.0047	2.843e-06	-0.0441	0.0284	0.12	0.596548	8.5719e-05
rs13173241	nonHDL	5	55861359	A	G	-0.0237	0.0019	34.9833	-0.067	0.008	5.5e-17	-0.022	0.0047	2.843e-06	-0.0441	0.0284	0.12	0.344239	0.000283527
rs13173241	TC	5	55861359	A	G	-0.0146	0.0015	21.6628	-0.067	0.008	5.5e-17	-0.022	0.0047	2.843e-06	-0.0441	0.0284	0.12	0.0159301	0.000406952
rs43217	nonHDL	5	57578037	A	G	-0.0124	0.0016	14.0367	-0.025	0.0069	0.00032	-0.0065	0.0041	0.1147	-0.0166	0.0248	0.5035	0.00538586	0.71351
rs43217	TC	5	57578037	A	G	-0.0091	0.0013	11.5918	-0.025	0.0069	0.00032	-0.0065	0.0041	0.1147	-0.0166	0.0248	0.5035	0.00531183	0.735557
rs151912	logTG	5	57607142	A	T	-0.0117	0.0013	18.6464	-0.028	0.0064	1.3e-05	-0.005	0.0038	0.1919	-0.0192	0.0236	0.4157	0.00386371	0.975968
rs4976033	logTG	5	67714246	G	A	-0.0165	0.0013	36.1855	-0.035	0.0065	1e-07	-0.0082	0.0038	0.03053	-0.0448	0.0234	0.05519	0.0131766	0.998914
rs3010278	TC	5	72013573	T	G	-0.0163	0.0015	26.7795	-0.0009	0.0077	0.91	-0.0047	0.0046	0.3069	-0.0373	0.0285	0.1907	0.00239759	0.00283697
rs4704043	LDL	5	72159179	T	C	-0.0159	0.0014	29.1653	0.0007	0.0075	0.93	-0.0014	0.004	0.7214	-0.0474	0.0257	0.06558	0.00159347	0.00161416
rs4704043	nonHDL	5	72159179	T	C	-0.0174	0.0016	26.8191	0.0007	0.0075	0.93	-0.0014	0.004	0.7214	-0.0474	0.0257	0.06558	0.00158733	0.00160289
rs12916	LDL	5	74656539	C	T	-0.0688	0.0013	610.019	0.032	0.0069	4.1e-06	-0.017	0.0037	5.624e-06	0.0327	0.0233	0.159	0.817154	0.00345723
rs12916	nonHDL	5	74656539	C	T	-0.0667	0.0015	431.108	0.032	0.0069	4.1e-06	-0.017	0.0037	5.624e-06	0.0327	0.0233	0.159	0.817154	0.00345723
rs12916	TC	5	74656539	C	T	-0.0643	0.0012	625.295	0.032	0.0069	4.1e-06	-0.017	0.0037	5.624e-06	0.0327	0.0233	0.159	0.817154	0.00345723
rs10052346	logTG	5	78472599	G	T	-0.0096	0.0013	12.8156	-0.039	0.0065	2.1e-09	0.0043	0.0038	0.2521	-0.0194	0.0239	0.4174	0.00497712	0.90369
rs115912456	logTG	5	82815158	A	G	-0.0261	0.0033	14.5862	-0.027	0.016	0.086	-0.0157	0.0104	0.1297	-0.0711	0.0573	0.2148	0.0120824	0.048225
rs7704653	logTG	5	90255685	G	A	-0.0102	0.0014	12.4949	-0.012	0.0071	0.1	-0.0012	0.0042	0.7795	0.0049	0.0261	0.8512	0.00165402	0.0144424
rs172305	logTG	5	107316915	G	A	-0.008	0.0013	9.12133	-0.012	0.0069	0.077	-0.0142	0.0039	0.0002827	-0.0348	0.025	0.1633	0.533238	0.0480021
rs33568	logTG	5	112304202	G	T	-0.0087	0.0013	10.6582	-0.024	0.0064	0.00019	-0.0016	0.0038	0.6691	-0.0585	0.023	0.01105	0.00199512	0.953058
rs1045242	logTG	5	118729327	A	G	-0.0186	0.0014	39.5526	-0.016	0.0071	0.026	-0.0078	0.0043	0.06762	-0.0418	0.0255	0.101	0.00793265	0.0562689
rs6869704	LDL	5	122833667	T	C	-0.0161	0.0013	34.4995	0.011	0.0064	0.074	0.0155	0.0038	4.147e-05	-0.0071	0.0231	0.7589	0.838738	0.00774199
rs6869704	nonHDL	5	122833667	T	C	-0.0144	0.0015	21.0972	0.011	0.0064	0.074	0.0155	0.0038	4.147e-05	-0.0071	0.0231	0.7589	0.830314	0.00882958
rs6869704	TC	5	122833667	T	C	-0.0139	0.0012	30.3005	0.011	0.0064	0.074	0.0155	0.0038	4.147e-05	-0.0071	0.0231	0.7589	0.847497	0.00750096
rs7734927	logTG	5	127453735	A	T	-0.0108	0.0015	12.2203	-0.032	0.0076	2.6e-05	-0.0084	0.0048	0.07929	-0.0138	0.0272	0.6108	0.031507	0.971932
rs26008	logTG	5	131008194	T	C	-0.0236	0.0023	23.9757	-0.02	0.013	0.14	-0.0007	0.0067	0.9124	0.0465	0.047	0.3229	0.00253005	0.0280349
rs7730247	nonHDL	5	131781288	A	C	-0.0154	0.0018	16.9307	0.0022	0.008	0.78	0.0024	0.0043	0.5712	-0.0023	0.0285	0.9362	0.000133594	0.00648239
rs6894249	TC	5	131797547	G	A	-0.0131	0.0012	27.0179	-0.0063	0.0064	0.33	-0.0076	0.0037	0.04246	-0.0058	0.0236	0.8052	0.000860788	0.0081059
rs2057655	LDL	5	131807624	G	A	-0.0183	0.0015	33.5075	0.0052	0.008	0.51	-0.0014	0.0043	0.7539	-0.0033	0.0289	0.9098	0.000131303	0.0074127
rs72801474	logTG	5	132444128	G	A	-0.0301	0.0023	38.4079	-0.026	0.011	0.015	-0.0195	0.0077	0.01147	-0.0415	0.0431	0.3364	0.0620013	0.123643
rs2108665	logTG	5	134136333	T	C	-0.0138	0.0019	12.4223	-0.026	0.011	0.012	-0.0011	0.0055	0.844	-0.0252	0.0371	0.4959	0.00190312	0.157789
rs13179861	LDL	5	139527721	G	A	-0.011	0.0016	11.2077	-0.022	0.0083	0.0074	0.0066	0.0048	0.1657	0.0536	0.0304	0.07789	0.00161392	0.158934
rs60714373	TC	5	139651321	T	C	-0.0129	0.0014	19.504	-0.021	0.0077	0.007	0.0013	0.0045	0.7668	0.0595	0.0284	0.03607	0.00147902	0.167968
rs12187444	nonHDL	5	139664820	T	C	-0.0131	0.0018	12.4693	-0.021	0.0077	0.0079	0.0036	0.0045	0.4198	0.0611	0.0285	0.03218	0.00202062	0.16874
rs60987104	logTG	5	140063891	AAAAC	A	-0.0111	0.0016	11.3989	na	na	na	-0.0029	0.005	0.5577	na	na	na	0.0024732	0.15129
rs12523418	logTG	5	141707225	A	G	-0.0093	0.0014	10.5119	-0.0026	0.0069	0.71	-0.0044	0.0042	0.2944	-0.0095	0.0254	0.7068	0.00255472	0.00547052
rs11167778	LDL	5	141888881	T	C	-0.0191	0.0021	19.0251	0.017	0.01	0.093	-0.0307	0.0065	2.67e-06	-0.0153	0.0395	0.6977	0.420788	0.0157512
rs11167778	TC	5	141888881	T	C	-0.0136	0.002	10.9804	0.017	0.01	0.093	-0.0307	0.0065	2.67e-06	-0.0153	0.0395	0.6977	0.534482	0.01292
rs10077941	nonHDL	5	141911176	A	G	-0.0142	0.0022	9.96439	0.011	0.01	0.27	-0.0259	0.0056	3.658e-06	-0.0122	0.0381	0.749	0.5182	0.00987817
rs245078	logTG	5	149353598	A	G	-0.0079	0.0013	8.91183	0.0056	0.0066	0.4	-0.0128	0.0038	0.0007861	-0.0012	0.0234	0.958	0.181469	0.00666118
rs216140	nonHDL	5	149443298	T	C	-0.0115	0.0017	10.8743	0.0034	0.0072	0.64	-0.0067	0.004	0.09972	0.0228	0.0261	0.3817	0.00940415	0.00590169
rs185653065	nonHDL	5	155581796	G	A	-0.1702	0.0281	8.85781	-0.18	0.15	0.23	na	na	na	-1.1359	0.8549	0.1839	0.0180391	0.037478
rs6874202	LDL	5	156391628	C	T	-0.0361	0.0013	168.991	0.0095	0.0066	0.15	-0.0161	0.0039	3.658e-05	-0.0155	0.0238	0.5133	0.86177	0.0136104
rs6874202	logTG	5	156391628	C	T	-0.0342	0.0013	151.805	0.0095	0.0066	0.15	-0.0161	0.0039	3.658e-05	-0.0155	0.0238	0.5133	0.867795	0.0133158
rs6874202	nonHDL	5	156391628	C	T	-0.0463	0.0015	208.475	0.0095	0.0066	0.15	-0.0161	0.0039	3.658e-05	-0.0155	0.0238	0.5133	0.869812	0.0133809
rs6874202	TC	5	156391628	C	T	-0.0438	0.0012	290.955	0.0095	0.0066	0.15	-0.0161	0.0039	3.658e-05	-0.0155	0.0238	0.5133	0.861664	0.0137101
rs2914231	logTG	5	158011435	C	G	-0.0216	0.0014	52.9781	-0.037	0.0075	1.1e-06	-0.0168	0.0042	6.709e-05	-0.0164	0.027	0.5435	0.583742	0.896797
rs72812818	logTG	5	173356752	C	G	-0.0097	0.0014	11.3715	-0.018	0.0068	0.0075	0.0181	0.0043	2.929e-05	-0.0492	0.0252	0.05096	0.732158	0.125176
rs31778	LDL	5	176522036	C	T	-0.0096	0.0014	11.1533	0.0098	0.007	0.16	-0.0029	0.0041	0.4721	-0.0124	0.0253	0.6241	0.00204883	0.0141124
rs4976677	logTG	5	176629546	G	A	-0.015	0.0016	20.16	-0.0061	0.0075	0.42	-0.0086	0.0049	0.07891	0.0123	0.0272	0.652	0.00743811	0.00703299
rs188238483	TC	5	180308441	T	C	-0.0422	0.0074	7.9284	-0.039	0.036	0.27	0.0217	0.0229	0.3433	0.0612	0.1365	0.6537	0.0133316	0.0248188
rs35742417	logTG	6	7247344	C	A	-0.0116	0.0017	11.0514	-0.038	0.0083	3.7e-06	-0.0181	0.0052	0.0005055	-0.0159	0.0301	0.5979	0.423285	0.871717
rs113251986	LDL	6	11842824	G	A	-0.0206	0.0024	17.0354	0.0067	0.013	0.59	-0.0139	0.0071	0.04929	-0.0117	0.047	0.8037	0.0248443	0.0102753
rs34451811	nonHDL	6	11865597	T	C	-0.0236	0.0029	15.3957	0.0083	0.012	0.49	-0.0137	0.0068	0.04264	0.0046	0.0463	0.9217	0.0196485	0.00986066
rs4713979	TC	6	11868682	T	C	-0.0131	0.0015	17.6068	0.0092	0.0074	0.22	-0.0033	0.0047	0.491	0.0054	0.0289	0.8531	0.00356652	0.0104619
rs7746081	LDL	6	16126934	G	A	-0.0295	0.0013	113.273	-0.0058	0.0068	0.4	-0.0132	0.004	0.001013	-0.006	0.0246	0.8064	0.219094	0.00651782
rs2235215	nonHDL	6	16131156	T	C	-0.0295	0.0016	75.1824	-0.0056	0.0068	0.41	-0.0131	0.004	0.001223	-0.0047	0.0247	0.8482	0.219075	0.00655611
rs2235215	TC	6	16131156	T	C	-0.0259	0.0013	87.5905	-0.0056	0.0068	0.41	-0.0131	0.004	0.001223	-0.0047	0.0247	0.8482	0.219273	0.00655671
rs6924805	logTG	6	18747705	G	T	-0.0091	0.0013	11.5918	0.0006	0.0065	0.93	-0.0019	0.0039	0.6327	0.0414	0.0236	0.07873	0.00178724	0.00621138
rs6924805	nonHDL	6	18747705	G	T	-0.012	0.0015	14.9051	0.0006	0.0065	0.93	-0.0019	0.0039	0.6327	0.0414	0.0236	0.07873	0.00167652	0.00469192
rs6924805	TC	6	18747705	G	T	-0.01	0.0012	16.1046	0.0006	0.0065	0.93	-0.0019	0.0039	0.6327	0.0414	0.0236	0.07873	0.00167359	0.00461415
rs12189754	LDL	6	18757805	T	C	-0.0098	0.0014	11.5918	na	na	na	-0.0015	0.0047	0.7598	na	na	na	0.00186031	0.00499715
rs9368188	LDL	6	20413721	G	A	-0.0093	0.0013	12.0738	0.013	0.0067	0.056	-0.0101	0.004	0.01114	-0.009	0.0243	0.7095	0.0379195	3.99682e-08
rs9368188	nonHDL	6	20413721	G	A	-0.0121	0.0015	15.1412	0.013	0.0067	0.056	-0.0101	0.004	0.01114	-0.009	0.0243	0.7095	0.0430435	5.03314e-09
rs9368188	TC	6	20413721	G	A	-0.012	0.0013	19.5707	0.013	0.0067	0.056	-0.0101	0.004	0.01114	-0.009	0.0243	0.7095	0.0241464	2.08639e-07
rs7748382	logTG	6	20665549	A	G	-0.011	0.0013	16.5786	-0.12	0.0067	8.8e-69	-0.0083	0.0039	0.03292	-0.0179	0.0245	0.4651	0.0155035	0.951984
rs9466056	LDL	6	21384613	G	A	-0.0094	0.0013	12.3185	-0.0072	0.0063	0.26	0.0046	0.0037	0.2174	0.0321	0.0235	0.1714	0.0035692	0.00860746
rs4710973	TC	6	21385702	C	T	-0.0089	0.0012	12.9204	-0.0072	0.0066	0.28	0.0059	0.0039	0.1254	0.0263	0.024	0.2718	0.00404355	0.00859518
rs10946458	nonHDL	6	21391282	T	C	-0.011	0.0016	11.2077	-0.0065	0.0068	0.34	0.0049	0.004	0.216	0.0241	0.025	0.3352	0.00342858	0.00825564
rs113760175	LDL	6	22343592	G	A	-0.021	0.0028	13.1951	0.011	0.013	0.39	0.0045	0.0087	0.6043	-0.0265	0.0492	0.5895	0.00296845	0.0130757
rs113760175	TC	6	22343592	G	A	-0.0227	0.0027	16.3776	0.011	0.013	0.39	0.0045	0.0087	0.6043	-0.0265	0.0492	0.5895	0.00297459	0.0131144
rs181058325	LDL	6	25314597	A	G	-0.0269	0.0028	21.1273	0.001	0.013	0.94	-0.0364	0.0091	6.97e-05	0.0093	0.0477	0.8451	0.870088	0.00850085
rs181058325	nonHDL	6	25314597	A	G	-0.0226	0.0032	11.7864	0.001	0.013	0.94	-0.0364	0.0091	6.97e-05	0.0093	0.0477	0.8451	0.869585	0.00849418
rs181058325	TC	6	25314597	A	G	-0.0237	0.0027	17.778	0.001	0.013	0.94	-0.0364	0.0091	6.97e-05	0.0093	0.0477	0.8451	0.870088	0.00850085
rs80215559	LDL	6	25918225	T	C	-0.058	0.0028	94.5892	0.043	0.013	0.00091	-0.0376	0.0088	2.17e-05	0.0945	0.0478	0.04837	0.0012406	0.674566
rs80215559	nonHDL	6	25918225	T	C	-0.0508	0.0033	52.7453	0.043	0.013	0.00091	-0.0376	0.0088	2.17e-05	0.0945	0.0478	0.04837	0.00124064	0.674555
rs80215559	TC	6	25918225	T	C	-0.0505	0.0027	77.3355	0.043	0.013	0.00091	-0.0376	0.0088	2.17e-05	0.0945	0.0478	0.04837	0.0012406	0.674566
rs9379828	logTG	6	26167951	C	G	-0.0076	0.0013	8.29837	-0.0058	0.0071	0.42	-0.0042	0.0041	0.3121	-0.0271	0.0248	0.2758	0.0265572	0.102298
rs35657082	LDL	6	27067657	A	T	-0.0325	0.0026	35.127	0.019	0.013	0.13	-0.0247	0.0083	0.002863	0.0459	0.0454	0.312	0.000171587	0.0269193
rs35657082	nonHDL	6	27067657	A	T	-0.026	0.0032	15.3493	0.019	0.013	0.13	-0.0247	0.0083	0.002863	0.0459	0.0454	0.312	0.000187338	0.0357694
rs35657082	TC	6	27067657	A	T	-0.0293	0.0026	28.73	0.019	0.013	0.13	-0.0247	0.0083	0.002863	0.0459	0.0454	0.312	0.000174776	0.0299468
rs13201681	logTG	6	28394680	C	T	-0.0183	0.0024	13.6125	0.013	0.011	0.23	-0.0175	0.0074	0.01798	-0.029	0.0389	0.456	1.47245e-06	0.0136155
rs3118362	TC	6	28785085	T	C	-0.0266	0.0026	23.8405	0.0018	0.012	0.88	-0.0292	0.0081	0.0002883	0.0566	0.045	0.2088	2.12844e-06	0.00753717
rs1233393	logTG	6	29549653	C	G	-0.0209	0.0024	17.5109	0.012	0.011	0.26	-0.0218	0.0072	0.002359	-0.0229	0.0373	0.5382	4.82406e-07	0.0128859
rs113360274	nonHDL	6	29850784	G	A	-0.0187	0.0019	22.1299	0.012	0.0081	0.14	-0.0146	0.0045	0.001297	-0.0282	0.0286	0.3244	7.04017e-08	0.0149788
rs3893464	LDL	6	29935250	A	G	-0.0147	0.0013	28.9201	0.0045	0.0065	0.49	-0.0025	0.0037	0.4973	-0.0227	0.0228	0.3198	8.65722e-10	0.00564786
rs2844795	TC	6	30073847	T	C	-0.0158	0.0013	33.2618	-0.0027	0.0065	0.68	na	na	na	-0.049	0.023	0.03333	2.44757e-06	0.00481635
rs2517601	logTG	6	30074072	G	C	-0.0229	0.0026	17.8936	0.007	0.01	0.5	-0.0108	0.0064	0.09303	-0.0031	0.0357	0.93	1.50389e-06	0.011045
rs56248798	nonHDL	6	30597083	T	C	-0.0361	0.0044	15.6355	-0.027	0.017	0.097	-0.0484	0.0111	1.293e-05	-0.1344	0.0598	0.02455	5.59532e-08	0.0408699
rs1264347	logTG	6	30798697	C	T	-0.0246	0.0022	28.3006	0.023	0.0099	0.021	na	na	na	-0.0395	0.0348	0.256	1.75306e-10	0.0316223
rs1265097	nonHDL	6	31106459	A	C	-0.0302	0.0026	30.4631	-0.028	0.011	0.012	-0.0234	0.0062	0.0001659	-0.1046	0.0382	0.006169	5.41898e-11	3.60582e-09
rs2524143	TC	6	31263510	C	T	-0.023	0.0015	52.3393	-0.027	0.0071	0.00019	na	na	na	-0.0638	0.026	0.01425	2.13644e-08	3.01495e-08
rs9378248	logTG	6	31326289	A	G	-0.0241	0.0013	75.9954	-0.034	0.0066	2.6e-07	na	na	na	-0.0253	0.0237	0.2862	5.60405e-08	2.60702e-06
rs622871	logTG	6	31878495	G	A	-0.0269	0.0015	71.1886	-0.033	0.007	2.1e-06	-0.0271	0.0046	2.939e-09	-0.0654	0.0256	0.0106	0.137994	4.10113e-08
rs3128759	LDL	6	31885930	T	C	-0.0166	0.0014	31.7042	-0.031	0.0066	3.8e-06	-0.0286	0.0042	7.203e-12	-0.0597	0.0241	0.01328	0.739851	1.54408e-07
rs3128759	nonHDL	6	31885930	T	C	-0.0203	0.0017	32.1415	-0.031	0.0066	3.8e-06	-0.0286	0.0042	7.203e-12	-0.0597	0.0241	0.01328	0.688642	1.66649e-07
rs3128759	TC	6	31885930	T	C	-0.0208	0.0013	56.8936	-0.031	0.0066	3.8e-06	-0.0286	0.0042	7.203e-12	-0.0597	0.0241	0.01328	0.689974	1.50847e-07
rs2071805	logTG	6	32441696	T	C	-0.0634	0.0028	112.785	-0.0001	0.015	0.99	na	na	na	0.0226	0.0577	0.6958	2.55942e-10	3.61829e-15
rs35062987	TC	6	32590735	T	C	-0.0404	0.0016	139.946	0.0081	0.0084	0.33	na	na	na	-0.0702	0.0305	0.02137	2.78596e-07	4.92598e-18
rs6689	nonHDL	6	32627700	G	A	-0.045	0.0021	101.14	0.0083	0.008	0.3	0.0013	0.0055	0.8063	-0.0709	0.0294	0.01601	4.43705e-09	4.93305e-18
rs35282906	LDL	6	32657201	A	T	-0.0429	0.002	101.34	-0.0013	0.01	0.9	-0.0137	0.0059	0.02081	-0.0809	0.0355	0.02262	6.27941e-08	3.80095e-18
rs77136196	logTG	6	34247047	T	C	-0.0242	0.0036	10.7472	-0.086	0.017	2e-07	-0.0416	0.0115	0.000284	-0.0873	0.0589	0.1382	0.784674	0.977522
rs3800461	LDL	6	34616322	G	C	-0.0244	0.0021	30.4818	0.0028	0.0099	0.78	0.0424	0.0065	7.249e-11	-0.0505	0.0355	0.1543	0.900073	0.00429868
rs3800461	nonHDL	6	34616322	G	C	-0.0218	0.0024	18.9776	0.0028	0.0099	0.78	0.0424	0.0065	7.249e-11	-0.0505	0.0355	0.1543	0.923965	0.00404219
rs3800461	TC	6	34616322	G	C	-0.0346	0.002	66.3275	0.0028	0.0099	0.78	0.0424	0.0065	7.249e-11	-0.0505	0.0355	0.1543	0.93315	0.00402988
rs6934083	logTG	6	35237153	T	C	-0.015	0.0029	6.63622	0.0091	0.018	0.61	-0.0282	0.0082	0.0006254	0.1034	0.0607	0.08827	0.00511019	0.0407944
rs11759543	nonHDL	6	35508531	G	A	-0.0217	0.0032	10.9239	-0.04	0.013	0.0022	0.0091	0.0081	0.2615	-0.0204	0.0491	0.6773	8.33815e-05	0.446182
rs730506	logTG	6	36645968	G	C	-0.0111	0.0015	12.8659	-0.029	0.008	0.00025	-0.0156	0.0047	0.0008367	-0.009	0.0289	0.7563	0.652638	0.798021
rs9296208	nonHDL	6	37029684	A	C	-0.0139	0.0015	19.7166	-0.0023	0.0063	0.72	-0.0065	0.0039	0.1005	0.0095	0.0231	0.6822	0.0069468	0.00487427
rs11380614	LDL	6	37037818	T	TA	-0.0125	0.0014	18.365	na	na	na	na	na	na	na	na	na	0.0467208	0.0046093
rs913499	TC	6	37038432	A	G	-0.0155	0.0012	37.4407	-0.0014	0.0063	0.83	-0.0088	0.0039	0.02385	0.0066	0.0229	0.7721	0.0128566	0.004534
rs11759627	LDL	6	39238772	T	C	-0.0091	0.0014	10.0952	0.0041	0.0067	0.54	-0.0022	0.0044	0.6136	0.0101	0.0248	0.6837	6.25295e-05	0.00503747
rs11759627	TC	6	39238772	T	C	-0.0096	0.0014	11.1533	0.0041	0.0067	0.54	-0.0022	0.0044	0.6136	0.0101	0.0248	0.6837	1.03891e-05	0.00375726
rs143069752	nonHDL	6	40962537	T	A	-0.0221	0.003	12.7571	-0.028	0.013	0.024	-0.0213	0.0082	0.009845	0.0501	0.0448	0.2632	0.0742413	0.0974546
rs742493	logTG	6	40998167	T	C	-0.018	0.002	18.6464	-0.029	0.01	0.0041	-0.0172	0.0062	0.005363	-0.0259	0.0355	0.4651	0.100762	0.289347
rs7747505	logTG	6	42839062	G	A	-0.0099	0.0015	10.386	-0.0043	0.0071	0.55	0.0036	0.0045	0.4142	0.016	0.0262	0.5397	0.00233587	0.00841156
rs3818554	nonHDL	6	42934620	C	T	-0.012	0.0015	14.9051	-0.012	0.0063	0.065	-0.0063	0.0038	0.09473	-0.0176	0.0231	0.4478	0.00474575	0.0149976
rs2395943	LDL	6	42940673	A	G	-0.0134	0.0013	24.1868	-0.0073	0.0064	0.26	-0.0052	0.0038	0.179	-0.0148	0.0232	0.5243	0.00340153	0.00809177
rs9472125	LDL	6	43756169	C	T	-0.0143	0.0022	10.0952	-0.043	0.011	8.9e-05	-0.0383	0.0072	1.24e-07	-0.0886	0.0421	0.03514	0.992029	0.73841
rs998584	logTG	6	43757896	A	C	-0.0364	0.0013	171.789	-0.041	0.0065	6e-10	-0.0348	0.0038	4.129e-20	-0.0021	0.0229	0.928	0.982763	0.0669193
rs998584	nonHDL	6	43757896	A	C	-0.0221	0.0015	48.4047	-0.041	0.0065	6e-10	-0.0348	0.0038	4.129e-20	-0.0021	0.0229	0.928	0.982806	0.0667632
rs998584	TC	6	43757896	A	C	-0.0093	0.0013	12.0738	-0.041	0.0065	6e-10	-0.0348	0.0038	4.129e-20	-0.0021	0.0229	0.928	0.999799	0.121707
rs9367489	LDL	6	52458678	G	C	-0.0137	0.0013	25.2409	-0.0033	0.0066	0.62	-0.0042	0.004	0.2859	0.0069	0.0243	0.7776	0.00277216	0.0100595
rs9367489	TC	6	52458678	G	C	-0.0122	0.0013	20.1997	-0.0033	0.0066	0.62	-0.0042	0.004	0.2859	0.0069	0.0243	0.7776	0.00277316	0.00545222
rs6458869	logTG	6	52630269	C	A	-0.0184	0.0013	44.7525	0.021	0.0066	0.002	0.003	0.004	0.4513	0.0259	0.0243	0.2861	0.00231353	0.381602
rs2894801	nonHDL	6	52643065	G	A	-0.0149	0.0016	19.9036	0.018	0.0064	0.0066	-0.0009	0.0039	0.8137	0.0217	0.0234	0.3553	0.00155616	0.168834
rs6458949	nonHDL	6	53508265	T	G	-0.0165	0.0017	21.5458	-0.0074	0.0072	0.31	-0.0088	0.0043	0.04043	0.0007	0.0262	0.98	0.0101884	0.0082195
rs12662589	LDL	6	53509035	C	G	-0.0139	0.0015	19.7166	-0.007	0.0072	0.33	-0.0088	0.0044	0.04668	0.0028	0.0263	0.9146	0.00774708	0.0093504
rs12662589	TC	6	53509035	C	G	-0.0137	0.0014	21.8871	-0.007	0.0072	0.33	-0.0088	0.0044	0.04668	0.0028	0.0263	0.9146	0.0108419	0.00816687
rs398085093	logTG	6	86296925	C	CA	-0.0106	0.0014	13.4328	na	na	na	0.0034	0.005	0.4931	na	na	na	0.00299	0.0278282
rs146824639	TC	6	88166740	C	T	-0.0098	0.0014	11.5918	na	na	na	0.005	0.0048	0.3017	na	na	na	0.00753987	0.00684646
rs17789218	nonHDL	6	100600097	T	C	-0.0218	0.0019	29.7474	-0.0022	0.0075	0.77	0.0067	0.0049	0.1685	-0.0219	0.028	0.4341	0.00355909	0.00576795
rs9496567	LDL	6	100602753	G	A	-0.0189	0.0015	35.6754	-0.0017	0.0075	0.82	0.0029	0.0047	0.538	-0.0194	0.028	0.4885	0.0024043	0.00568685
rs9496614	logTG	6	100613551	T	C	-0.0117	0.0015	14.2083	-0.0005	0.0075	0.95	0.0034	0.0048	0.4796	-0.0219	0.0279	0.4335	0.00234016	0.00570709
rs9496614	TC	6	100613551	T	C	-0.0197	0.0015	38.6734	-0.0005	0.0075	0.95	0.0034	0.0048	0.4796	-0.0219	0.0279	0.4335	0.00376434	0.00579244
rs12524934	nonHDL	6	101431977	T	C	-0.012	0.0015	14.9051	0.0012	0.0063	0.85	-0.0029	0.0038	0.449	0.0263	0.023	0.2543	0.00536445	0.00836535
rs12524934	TC	6	101431977	T	C	-0.0123	0.0012	23.9269	0.0012	0.0063	0.85	-0.0029	0.0038	0.449	0.0263	0.023	0.2543	0.00196501	0.00467899
rs1358756	LDL	6	101432314	G	A	-0.0122	0.0013	20.1997	0.0012	0.0063	0.85	-0.0028	0.0038	0.4664	0.0263	0.023	0.2543	0.0019495	0.00468085
rs6913325	LDL	6	106378009	G	T	-0.0107	0.0013	15.7305	-0.0004	0.0063	0.95	-0.0058	0.0038	0.1271	0.0083	0.0232	0.7189	0.00481618	0.00479816
rs6913325	logTG	6	106378009	G	T	-0.0091	0.0013	11.5918	-0.0004	0.0063	0.95	-0.0058	0.0038	0.1271	0.0083	0.0232	0.7189	0.00599624	0.00667732
rs6913325	nonHDL	6	106378009	G	T	-0.014	0.0015	19.9889	-0.0004	0.0063	0.95	-0.0058	0.0038	0.1271	0.0083	0.0232	0.7189	0.00473314	0.00475881
rs6913325	TC	6	106378009	G	T	-0.0103	0.0012	17.0354	-0.0004	0.0063	0.95	-0.0058	0.0038	0.1271	0.0083	0.0232	0.7189	0.00473693	0.00475908
rs35045014	logTG	6	107432157	A	C	-0.0123	0.0013	20.5179	-0.03	0.0064	4.3e-06	-0.0036	0.0039	0.3564	-0.0351	0.024	0.144	0.00214615	0.545364
rs9480889	logTG	6	109189021	G	C	-0.0143	0.0015	20.8173	-0.022	0.0084	0.0088	-0.0071	0.0044	0.1086	0.0124	0.0284	0.6627	0.00596771	0.109109
rs11153143	TC	6	109300661	C	T	-0.0153	0.0019	15.0913	-0.01	0.0096	0.3	-0.0014	0.0059	0.8156	-0.01	0.0349	0.7742	0.0024156	0.012744
rs2273668	LDL	6	109323519	G	T	-0.0137	0.002	11.1316	-0.01	0.0097	0.29	-0.0025	0.006	0.6803	-0.0114	0.0349	0.7427	0.00238967	0.0126672
rs3822855	TC	6	116316882	T	G	-0.0206	0.0012	65.3263	0.013	0.0064	0.047	0.0077	0.0038	0.04243	0.0177	0.0233	0.4483	0.00420573	0.0178847
rs6918059	nonHDL	6	116349041	C	T	-0.0175	0.0016	27.1176	0.01	0.0064	0.12	-0.0007	0.004	0.862	0.0153	0.0234	0.5115	0.00158548	0.0165605
rs13194714	LDL	6	116394819	T	A	-0.0169	0.0013	37.9124	0.01	0.0065	0.11	-0.0005	0.004	0.8914	0.0171	0.0234	0.4637	0.00151496	0.0171364
rs9388498	LDL	6	126873423	G	T	-0.0132	0.0017	14.0871	0.015	0.0084	0.073	-0.0092	0.0082	0.2624	0.0144	0.0317	0.6494	0.847753	0.00124029
rs9388498	TC	6	126873423	G	T	-0.0144	0.0016	18.6464	0.015	0.0084	0.073	-0.0092	0.0082	0.2624	0.0144	0.0317	0.6494	3.86417e-05	2.10203e-09
rs141783576	nonHDL	6	127439897	C	G	-0.039	0.0035	28.1102	na	na	na	-0.0186	0.0121	0.1257	na	na	na	0.0111803	3.12178e-09
rs577721086	logTG	6	127440047	C	T	-0.0527	0.0031	64.0856	-0.046	0.014	0.0014	-0.006	0.0142	0.6729	-0.1156	0.0535	0.03072	0.00573491	3.71491e-09
rs9388766	logTG	6	130354855	C	T	-0.0115	0.0013	18.0429	-0.021	0.007	0.0035	-0.008	0.004	0.04528	-0.0492	0.025	0.04919	0.0113527	0.0468039
rs4895864	nonHDL	6	130364482	T	C	-0.0121	0.0015	15.1412	-0.0009	0.0063	0.89	-0.0019	0.0038	0.6244	-0.023	0.0232	0.3227	0.00934359	0.0299694
rs11407151	LDL	6	130367863	TA	T	-0.0092	0.0014	10.3025	na	na	na	na	na	na	na	na	na	0.00675178	0.0333955
rs3890746	TC	6	130371055	T	C	-0.0089	0.0012	12.9204	-0.0011	0.0064	0.86	-0.0023	0.0038	0.5511	-0.0218	0.0233	0.3477	0.00187813	0.00117189
rs7776054	LDL	6	135418916	A	G	-0.0245	0.0014	67.8438	0.0006	0.0072	0.93	-0.0182	0.0042	1.37e-05	0.0287	0.0261	0.2713	0.780104	0.00527863
rs7776054	nonHDL	6	135418916	A	G	-0.0254	0.0017	49.75	0.0006	0.0072	0.93	-0.0182	0.0042	1.37e-05	0.0287	0.0261	0.2713	0.959416	0.005353
rs7776054	TC	6	135418916	A	G	-0.0266	0.0014	79.7682	0.0006	0.0072	0.93	-0.0182	0.0042	1.37e-05	0.0287	0.0261	0.2713	0.965659	0.00535209
rs62441843	LDL	6	139331253	G	A	-0.0206	0.0017	33.0697	0.0044	0.0084	0.6	-0.0076	0.0054	0.1593	0.0045	0.0308	0.8842	0.00523888	0.00575983
rs62441843	nonHDL	6	139331253	G	A	-0.0204	0.002	23.7027	0.0044	0.0084	0.6	-0.0076	0.0054	0.1593	0.0045	0.0308	0.8842	0.00496749	0.00576756
rs62441843	TC	6	139331253	G	A	-0.0199	0.0017	30.9248	0.0044	0.0084	0.6	-0.0076	0.0054	0.1593	0.0045	0.0308	0.8842	0.00362244	0.00646857
rs635769	LDL	6	139831981	T	C	-0.0083	0.0013	9.7649	-0.033	0.0065	3.9e-07	-0.0087	0.0038	0.0228	-0.0223	0.0237	0.3461	0.0123629	0.988276
rs2982521	nonHDL	6	139835329	A	T	-0.0174	0.0015	30.385	-0.034	0.0065	3e-07	-0.0074	0.0038	0.05162	-0.0215	0.0237	0.3649	0.0124777	0.988788
rs2982521	TC	6	139835329	A	T	-0.0091	0.0012	13.4726	-0.034	0.0065	3e-07	-0.0074	0.0038	0.05162	-0.0215	0.0237	0.3649	0.0123605	0.98872
rs17585887	logTG	6	139835498	T	C	-0.0255	0.0012	99.4819	-0.032	0.0064	5.3e-07	-0.0074	0.0038	0.04905	-0.0239	0.0233	0.3068	0.00984629	0.983259
rs36126113	logTG	6	140360260	T	A	-0.0123	0.0016	13.8238	-0.037	0.008	2.7e-06	-0.0095	0.0046	0.03883	0.0028	0.0291	0.9225	0.0149401	0.947491
rs9399414	TC	6	143268110	G	C	-0.0096	0.0013	12.8156	0.017	0.0071	0.015	0.0069	0.0041	0.09047	0.0027	0.0261	0.917	0.00547813	0.0342694
rs9480534	LDL	6	151015562	A	G	-0.0147	0.0022	10.6271	-0.013	0.011	0.23	-0.0033	0.007	0.6428	0.0371	0.0396	0.3496	1.95969e-05	0.0167873
rs1871859	LDL	6	151898506	T	C	-0.0167	0.0018	19.7618	0.0005	0.0095	0.96	-0.0087	0.005	0.08096	0.0324	0.0346	0.3489	0.00777426	0.00686596
rs1871859	nonHDL	6	151898506	T	C	-0.0169	0.0021	15.0736	0.0005	0.0095	0.96	-0.0087	0.005	0.08096	0.0324	0.0346	0.3489	0.0066621	0.0073352
rs1871859	TC	6	151898506	T	C	-0.0185	0.0017	26.8542	0.0005	0.0095	0.96	-0.0087	0.005	0.08096	0.0324	0.0346	0.3489	0.00778489	0.00686317
rs17710008	LDL	6	153043035	A	G	-0.0109	0.0017	9.84211	-0.0027	0.0085	0.75	0.0084	0.0051	0.1013	0.0504	0.0303	0.09598	0.0073756	0.00655249
rs685162	logTG	6	153463135	C	A	-0.0096	0.0013	12.8156	-0.022	0.0064	0.00054	-0.0017	0.004	0.6768	0.0155	0.0236	0.5097	0.00200362	0.706264
rs2297359	LDL	6	160492613	C	T	-0.0662	0.0039	63.8957	-0.018	0.027	0.52	na	na	na	-0.0198	0.0902	0.8266	5.26456e-38	0.00669027
rs78425119	logTG	6	160501825	A	G	-0.0338	0.0027	35.2282	0.0023	0.013	0.86	-0.0165	0.0087	0.05839	-0.0377	0.0457	0.4093	5.49062e-38	0.00819119
rs78425119	nonHDL	6	160501825	A	G	-0.0595	0.0032	76.4425	0.0023	0.013	0.86	-0.0165	0.0087	0.05839	-0.0377	0.0457	0.4093	5.26439e-38	0.00663303
rs78425119	TC	6	160501825	A	G	-0.0483	0.0026	76.3062	0.0023	0.013	0.86	-0.0165	0.0087	0.05839	-0.0377	0.0457	0.4093	3.21749e-33	0.00553263
rs55730499	TC	6	161005610	T	C	-0.1004	0.0026	325.484	-0.019	0.013	0.12	na	na	na	-0.0137	0.0445	0.7588	1	0.01004
rs41272086	logTG	6	161008646	A	G	-0.0378	0.0022	65.4397	-0.016	0.011	0.13	0.0415	0.0073	1.188e-08	-0.0486	0.0378	0.1989	1.35396e-56	0.00764495
rs10455872	LDL	6	161010118	G	A	-0.1137	0.0027	386.8	-0.02	0.013	0.1	na	na	na	-0.007	0.0446	0.8751	1	0.0102468
rs10455872	nonHDL	6	161010118	G	A	-0.1049	0.0032	234.963	-0.02	0.013	0.1	na	na	na	-0.007	0.0446	0.8751	1	0.0109266
rs1464780	logTG	6	161520837	A	G	-0.0229	0.003	13.6406	-0.01	0.015	0.49	-0.011	0.0101	0.2724	-0.0547	0.0546	0.3165	1.75876e-08	0.0115709
rs148349043	LDL	6	161659369	G	C	-0.0861	0.006	45.9725	-0.033	0.029	0.26	-0.181	0.0178	2.373e-24	0.0415	0.1071	0.6985	0.999999	0.0363935
rs148349043	nonHDL	6	161659369	G	C	-0.0805	0.0073	27.5499	-0.033	0.029	0.26	-0.181	0.0178	2.373e-24	0.0415	0.1071	0.6985	0.999363	0.0339698
rs148349043	TC	6	161659369	G	C	-0.0722	0.0058	34.845	-0.033	0.029	0.26	-0.181	0.0178	2.373e-24	0.0415	0.1071	0.6985	0.999998	0.0363875
rs73029263	logTG	6	164113762	A	G	-0.0177	0.0019	19.917	-0.055	0.0096	9.4e-09	-0.0147	0.0057	0.009585	-0.1065	0.0344	0.001949	0.0449057	0.996349
rs2362529	LDL	7	1067906	T	C	-0.0212	0.0015	44.6259	-0.011	0.008	0.17	-0.0089	0.0045	0.04988	-0.0317	0.0283	0.2635	0.0104443	0.0117559
rs2362529	nonHDL	7	1067906	T	C	-0.0184	0.0018	23.8022	-0.011	0.008	0.17	-0.0089	0.0045	0.04988	-0.0317	0.0283	0.2635	0.00722209	0.0107708
rs2362529	TC	7	1067906	T	C	-0.0232	0.0015	53.2347	-0.011	0.008	0.17	-0.0089	0.0045	0.04988	-0.0317	0.0283	0.2635	0.010273	0.011671
rs144787122	LDL	7	2296552	G	A	-0.11	0.0121	19.0078	0.11	0.054	0.043	0.0314	0.0383	0.4114	-0.2618	0.1934	0.1758	0.0197492	0.00990689
rs144787122	nonHDL	7	2296552	G	A	-0.0986	0.015	10.308	0.11	0.054	0.043	0.0314	0.0383	0.4114	-0.2618	0.1934	0.1758	0.0197484	0.00871587
rs144787122	TC	7	2296552	G	A	-0.1177	0.0118	22.7057	0.11	0.054	0.043	0.0314	0.0383	0.4114	-0.2618	0.1934	0.1758	0.019749	0.00889064
rs852424	logTG	7	5567596	T	C	-0.0088	0.0013	10.8878	-0.016	0.0063	0.012	-0.0011	0.004	0.7759	-0.0325	0.0247	0.1875	0.00243082	0.102054
rs79949326	TC	7	6461310	T	C	-0.0154	0.0014	27.4178	0.024	0.0073	0.0012	0.0201	0.0044	6.107e-06	0.0242	0.0268	0.3669	0.766919	0.371941
rs115942176	LDL	7	8471545	T	C	-0.1261	0.039	2.91238	na	na	na	na	na	na	1.5434	8.1293	0.8494	0.000846099	0.00598914
rs34046032	logTG	7	12268082	C	CTTAA	-0.0095	0.0013	12.5658	na	na	na	0.0212	0.0042	4.774e-07	na	na	na	0.691293	0.562929
rs38205	logTG	7	15913588	A	C	-0.0115	0.0013	18.0429	-0.026	0.0065	7.5e-05	-0.0146	0.0038	0.0001382	-0.0049	0.0241	0.8401	0.388809	0.722494
rs4410790	nonHDL	7	17284577	C	T	-0.0116	0.0015	13.9798	-0.022	0.0066	0.0011	-0.0144	0.0038	0.0001297	-0.0123	0.0237	0.6037	0.684437	0.370699
rs2106727	logTG	7	17287998	G	A	-0.0132	0.0013	23.4968	-0.024	0.0066	0.0004	-0.0149	0.0038	0.0001008	-0.0077	0.024	0.7483	0.697426	0.564904
rs2723509	logTG	7	17817037	A	G	-0.0132	0.0013	23.4968	-0.0015	0.0065	0.82	-0.0028	0.0039	0.4734	-0.0318	0.0234	0.1746	0.00187233	0.00484743
rs10242866	TC	7	17920613	C	T	-0.011	0.0012	19.3117	0.0004	0.0065	0.95	0.0028	0.0038	0.458	0.0373	0.0235	0.1123	0.0020229	0.00475769
rs55696093	LDL	7	21605973	G	A	-0.0367	0.0016	115.707	-0.0015	0.0079	0.85	-0.0134	0.0046	0.003725	0.023	0.0282	0.4153	0.116451	0.00539566
rs55696093	logTG	7	21605973	G	A	-0.0109	0.0016	11.0181	-0.0015	0.0079	0.85	-0.0134	0.0046	0.003725	0.023	0.0282	0.4153	0.158779	0.00543451
rs55696093	nonHDL	7	21605973	G	A	-0.0381	0.0018	98.7127	-0.0015	0.0079	0.85	-0.0134	0.0046	0.003725	0.023	0.0282	0.4153	0.0959127	0.00541844
rs55696093	TC	7	21605973	G	A	-0.0357	0.0015	124.476	-0.0015	0.0079	0.85	-0.0134	0.0046	0.003725	0.023	0.0282	0.4153	0.0979857	0.0054036
rs4722551	LDL	7	25991826	C	T	-0.0354	0.0018	85.3806	0.0031	0.0088	0.72	-0.01	0.0055	0.07105	-0.0485	0.031	0.1179	0.0102096	0.00410484
rs4722551	logTG	7	25991826	T	C	-0.0277	0.0017	58.9639	-0.0031	0.0088	0.72	0.01	0.0055	0.07105	0.0485	0.031	0.1179	0.0102096	0.00410505
rs4722551	nonHDL	7	25991826	C	T	-0.0248	0.0021	31.4578	0.0031	0.0088	0.72	-0.01	0.0055	0.07105	-0.0485	0.031	0.1179	0.0102096	0.00410545
rs4722551	TC	7	25991826	C	T	-0.0258	0.0017	51.2956	0.0031	0.0088	0.72	-0.01	0.0055	0.07105	-0.0485	0.031	0.1179	0.0102096	0.00410424
rs864745	logTG	7	28180556	T	C	-0.0094	0.0012	14.3232	-0.09	0.0063	2.5e-45	-0.0151	0.0038	6.503e-05	-0.0266	0.0228	0.242	0.608079	0.922724
rs3735569	LDL	7	28215361	C	G	-0.0164	0.002	15.6191	-0.048	0.011	2.2e-05	-0.0113	0.0057	0.04613	-0.0591	0.0402	0.1419	0.0128945	5.58862e-13
rs3735569	nonHDL	7	28215361	C	G	-0.018	0.0023	14.2982	-0.048	0.011	2.2e-05	-0.0113	0.0057	0.04613	-0.0591	0.0402	0.1419	0.0157208	1.88977e-11
rs3735569	TC	7	28215361	C	G	-0.0149	0.0019	14.3535	-0.048	0.011	2.2e-05	-0.0113	0.0057	0.04613	-0.0591	0.0402	0.1419	0.0144168	3.33555e-12
rs34578041	TC	7	36170409	C	T	-0.0112	0.0012	19.9889	0.0026	0.0061	0.67	-0.009	0.0038	0.01877	-0.0253	0.0234	0.2798	0.0253128	0.00505414
rs12533280	LDL	7	36171953	T	C	-0.0168	0.0016	25.0636	0.011	0.0085	0.2	-0.0164	0.0046	0.0004063	-0.0453	0.0291	0.1198	0.374811	0.0150605
rs11771125	nonHDL	7	36190426	T	C	-0.0187	0.0019	22.1299	0.012	0.0082	0.15	-0.0156	0.0048	0.001229	-0.0476	0.029	0.1014	0.491911	0.0123743
rs7808613	LDL	7	41746922	G	C	-0.0113	0.0015	13.3057	0.017	0.0074	0.022	-0.0116	0.0045	0.009669	0.0166	0.0277	0.5495	0.0540961	0.0706451
rs7808613	nonHDL	7	41746922	G	C	-0.013	0.0017	13.6869	0.017	0.0074	0.022	-0.0116	0.0045	0.009669	0.0166	0.0277	0.5495	0.0588007	0.0713953
rs995124	TC	7	41764992	T	C	-0.0113	0.0014	15.1581	0.017	0.0073	0.022	-0.0122	0.0044	0.005753	0.0158	0.0267	0.553	0.0701408	0.0652301
rs2070971	logTG	7	44197583	T	G	-0.0254	0.0017	49.75	-0.023	0.0093	0.014	-0.0114	0.0049	0.02074	-0.0481	0.0335	0.1516	0.0460139	6.00004e-09
rs17725246	LDL	7	44581986	C	T	-0.0377	0.0016	122.029	0.023	0.0082	0.0052	-0.0152	0.0045	0.000791	-0.0179	0.0293	0.5418	0.218958	0.0641275
rs17725246	nonHDL	7	44581986	C	T	-0.0394	0.0019	94.7927	0.023	0.0082	0.0052	-0.0152	0.0045	0.000791	-0.0179	0.0293	0.5418	0.97847	0.0369172
rs17725246	TC	7	44581986	C	T	-0.0349	0.0015	119.016	0.023	0.0082	0.0052	-0.0152	0.0045	0.000791	-0.0179	0.0293	0.5418	0.219003	0.064259
rs876038	TC	7	50308527	T	C	-0.0085	0.0013	10.2065	-0.0053	0.0068	0.44	0.014	0.004	0.0004615	0.0122	0.0248	0.6214	0.462599	0.00685334
rs799157	LDL	7	73020301	T	C	-0.0297	0.0037	15.0006	-0.035	0.017	0.04	-0.022	0.0122	0.07197	-0.1019	0.0593	0.08581	0.0196427	0.0698939
rs799157	nonHDL	7	73020301	T	C	-0.0618	0.0043	46.111	-0.035	0.017	0.04	-0.022	0.0122	0.07197	-0.1019	0.0593	0.08581	0.0198827	0.0702015
rs799157	TC	7	73020301	T	C	-0.0403	0.0036	28.3624	-0.035	0.017	0.04	-0.022	0.0122	0.07197	-0.1019	0.0593	0.08581	0.0198723	0.0702111
rs3812316	logTG	7	73020337	C	G	-0.1229	0.0019	910.463	0.036	0.0097	0.00022	-0.0015	0.0059	0.8013	-0.0171	0.0343	0.6173	0.00234683	0.836465
rs41301394	nonHDL	7	75612803	T	C	-0.0149	0.0016	19.9036	-0.011	0.007	0.13	0.0052	0.0041	0.2044	0.0018	0.0255	0.9448	0.0039881	0.0137064
rs41301394	TC	7	75612803	T	C	-0.0117	0.0013	18.6464	-0.011	0.007	0.13	0.0052	0.0041	0.2044	0.0018	0.0255	0.9448	0.00353621	0.0170085
rs2302429	LDL	7	75614777	A	G	-0.0125	0.0016	14.2513	0.0014	0.0082	0.86	0.0072	0.0047	0.1227	0.0156	0.0296	0.5992	0.00365279	0.010844
rs1057868	logTG	7	75615006	T	C	-0.0124	0.0014	18.0857	-0.01	0.007	0.16	0.0059	0.004	0.1402	0.0053	0.0253	0.8335	0.00412669	0.013215
rs56400413	TC	7	77340821	A	T	-0.0085	0.0014	8.89696	0.008	0.007	0.26	0.0012	0.0042	0.7823	0.0112	0.0256	0.6635	0.00178095	0.0124726
rs1229498	TC	7	81568750	T	G	-0.0113	0.0014	15.1581	-0.0076	0.0071	0.29	-0.0077	0.0044	0.07931	-0.0348	0.0259	0.1802	0.00830413	0.0117629
rs1229499	logTG	7	81573045	T	A	-0.0105	0.0014	13.1951	-0.0079	0.007	0.26	-0.0056	0.0043	0.1961	-0.0335	0.0254	0.1873	0.00754519	0.00940179
rs1468615	nonHDL	7	87074964	T	C	-0.0128	0.0019	10.7908	0.0072	0.0083	0.38	-0.0103	0.0046	0.02519	-0.0481	0.0302	0.1113	0.0164645	0.00867721
rs1014283	LDL	7	87076587	C	A	-0.0137	0.0016	16.9568	0.0072	0.0083	0.38	-0.0091	0.0045	0.04137	-0.0457	0.0301	0.1283	0.0126125	0.0092776
rs1014283	TC	7	87076587	C	A	-0.0144	0.0015	21.0972	0.0072	0.0083	0.38	-0.0091	0.0045	0.04137	-0.0457	0.0301	0.1283	0.0128179	0.00913806
rs705379	TC	7	94953895	G	A	-0.0084	0.0012	11.5918	0.0014	0.0068	0.84	-0.0029	0.0039	0.4537	-0.052	0.0233	0.02541	0.00186645	0.00528693
rs6967728	nonHDL	7	97915637	G	A	-0.019	0.0019	22.817	-0.021	0.0083	0.011	-0.0145	0.0048	0.002642	0.0034	0.0299	0.9099	0.1282	0.128791
rs112758337	LDL	7	97977268	G	A	-0.0187	0.0017	27.4178	-0.021	0.0084	0.01	-0.0141	0.0051	0.00521	0.0015	0.0298	0.9609	0.125341	0.127973
rs112758337	TC	7	97977268	G	A	-0.0173	0.0016	26.5223	-0.021	0.0084	0.01	-0.0141	0.0051	0.00521	0.0015	0.0298	0.9609	0.118359	0.126205
rs221793	LDL	7	100280896	A	C	-0.0287	0.0023	35.0083	0.047	0.011	1.9e-05	-0.0182	0.0073	0.01328	0.019	0.0395	0.6311	0.0458803	0.94004
rs221793	nonHDL	7	100280896	A	C	-0.0288	0.0027	25.8364	0.047	0.011	1.9e-05	-0.0182	0.0073	0.01328	0.019	0.0395	0.6311	0.0646939	0.964559
rs221793	TC	7	100280896	A	C	-0.0273	0.0022	34.6321	0.047	0.011	1.9e-05	-0.0182	0.0073	0.01328	0.019	0.0395	0.6311	0.0494698	0.979756
rs10250685	nonHDL	7	100873835	A	G	-0.0113	0.0017	10.5243	0.0006	0.0074	0.94	-0.004	0.0042	0.3477	0.0321	0.0257	0.2118	0.00275505	0.00512204
rs10250685	TC	7	100873835	A	G	-0.0092	0.0013	11.8315	0.0006	0.0074	0.94	-0.004	0.0042	0.3477	0.0321	0.0257	0.2118	0.00261934	0.00512711
rs803073	TC	7	101928279	G	A	-0.0087	0.0012	12.3801	0.01	0.0064	0.12	-0.0017	0.0039	0.6655	-0.0371	0.0229	0.1052	0.00162253	0.000696893
rs10264718	LDL	7	104638501	A	C	-0.0126	0.0018	11.5918	-0.0001	0.0099	0.99	-0.0041	0.005	0.4138	0.0303	0.0351	0.3889	0.00396825	0.00582644
rs2283038	logTG	7	106835410	C	T	-0.0098	0.0015	10.1916	-0.023	0.0075	0.002	0.0183	0.0046	8.605e-05	-0.0233	0.0273	0.3932	0.764163	0.452666
rs2299421	nonHDL	7	106946195	G	C	-0.0104	0.0016	10.0952	0.021	0.0069	0.0021	-0.0174	0.0041	2.195e-05	0.011	0.025	0.6607	0.862136	0.356873
rs10248717	LDL	7	107056795	G	A	-0.013	0.0014	19.7942	0.021	0.0069	0.0024	-0.0157	0.004	9.538e-05	0.0182	0.0248	0.4639	0.859423	0.290909
rs10248717	TC	7	107056795	G	A	-0.0091	0.0013	11.5918	0.021	0.0069	0.0024	-0.0157	0.004	9.538e-05	0.0182	0.0248	0.4639	0.947221	0.218531
rs6970946	logTG	7	107624109	C	T	-0.0162	0.0022	12.7472	-0.034	0.011	0.0025	-0.0136	0.0066	0.03833	-0.0002	0.0405	0.9956	0.019651	0.410304
rs138340572	TC	7	116305314	C	CA	-0.0095	0.0018	6.88353	na	na	na	na	na	na	na	na	na	0.00181684	0.0199367
rs10215153	logTG	7	116399131	A	G	-0.0113	0.0014	15.1581	-0.0085	0.0068	0.21	-0.0159	0.0042	0.0001301	-0.0122	0.025	0.6274	0.446208	0.00693585
rs10229792	logTG	7	116982907	A	G	-0.0126	0.0013	21.488	0.013	0.0066	0.044	-0.0156	0.0039	5.344e-05	-0.0361	0.0241	0.134	0.771025	0.0323456
rs62621812	LDL	7	127015083	A	G	-0.0294	0.0045	10.1916	-0.028	0.022	0.2	0.0175	0.0151	0.2453	-0.1359	0.0781	0.08168	0.011203	0.0319357
rs147138679	TC	7	130275219	G	A	-0.0094	0.0016	8.37382	na	na	na	-0.0086	0.0053	0.104	na	na	na	0.0597677	0.0229816
rs13234269	logTG	7	130429186	T	A	-0.0245	0.0013	78.5003	-0.048	0.0064	1e-13	-0.0162	0.0038	2.355e-05	-0.0385	0.0237	0.1044	0.883694	0.156342
rs13241165	nonHDL	7	130432538	A	T	-0.0156	0.0015	24.6057	-0.047	0.0063	7.7e-14	-0.0165	0.0037	1.065e-05	-0.0385	0.0237	0.104	0.929777	0.963412
rs6467314	LDL	7	130442141	G	C	-0.0099	0.0014	11.8143	-0.052	0.0069	7e-14	-0.019	0.004	2.005e-06	-0.0329	0.0254	0.1949	0.970125	0.98668
rs73729085	LDL	7	137561861	A	G	-0.0755	0.007	26.3957	0.081	0.12	0.5	-0.0342	0.0206	0.09623	-0.4451	0.3749	0.2351	0.0187225	0.0672403
rs73729085	TC	7	137561861	A	G	-0.0815	0.0067	33.3167	0.081	0.12	0.5	-0.0342	0.0206	0.09623	-0.4451	0.3749	0.2351	0.016959	0.0656769
rs6949316	logTG	7	149180625	C	G	-0.0091	0.0015	8.88408	-0.026	0.0073	0.00047	-0.0029	0.0046	0.5346	-0.0217	0.027	0.4225	0.0552495	0.721536
rs7808446	logTG	7	150214465	T	G	-0.014	0.0015	19.9889	-0.016	0.0071	0.026	0.0053	0.0044	0.2263	0.0506	0.0271	0.06228	0.00627218	0.101918
rs10279638	nonHDL	7	155024830	A	G	-0.0213	0.0025	16.7971	0.0086	0.012	0.47	-0.0052	0.0058	0.3763	-0.0313	0.0481	0.5143	0.0027821	0.00990633
rs10279638	TC	7	155024830	A	G	-0.0207	0.0021	22.1949	0.0086	0.012	0.47	-0.0052	0.0058	0.3763	-0.0313	0.0481	0.5143	0.00296307	0.00999009
rs4374942	LDL	7	155026807	C	T	-0.0188	0.0021	18.4586	0.009	0.012	0.44	-0.0052	0.0058	0.3701	-0.0234	0.048	0.6254	0.00277988	0.0100792
rs12538001	TC	7	158511941	T	C	-0.0079	0.0013	8.91183	0.0084	0.0069	0.23	-0.0097	0.0039	0.01409	-0.0401	0.0247	0.1053	0.011798	0.011437
rs11977408	nonHDL	7	158583806	T	C	-0.0153	0.0027	7.83683	na	na	na	-0.0111	0.0063	0.07987	na	na	na	0.0127238	0.0112457
rs13271435	logTG	8	4780903	G	A	-0.0094	0.0014	10.7236	-0.0098	0.0067	0.15	0.0071	0.0043	0.09915	0.0237	0.0242	0.3271	0.00618934	0.0239471
rs2928576	LDL	8	6600349	C	T	-0.0114	0.0014	15.4133	-0.0024	0.0067	0.72	0.0012	0.0041	0.7642	-0.0008	0.0251	0.9738	0.0015513	0.00455265
rs2928576	TC	8	6600349	C	T	-0.0116	0.0013	18.3434	-0.0024	0.0067	0.72	0.0012	0.0041	0.7642	-0.0008	0.0251	0.9738	0.00169244	0.0052402
rs2921064	logTG	8	8316637	C	T	-0.0144	0.0013	27.7895	0.037	0.0065	1.7e-08	-0.0025	0.004	0.5366	-0.0217	0.0233	0.3517	0.0017985	0.936261
rs2001354	LDL	8	8569030	T	C	-0.0108	0.0014	13.9148	-0.021	0.0074	0.0042	-0.0095	0.0042	0.02408	0.0627	0.0268	0.01911	0.0183536	0.00320149
rs4841132	LDL	8	9183596	G	A	-0.0601	0.0021	179.41	0.063	0.011	1.9e-08	-0.0091	0.0066	0.1678	0.0443	0.0402	0.2709	0.00596875	0.80589
rs4841132	TC	8	9183596	G	A	-0.0779	0.0021	300.475	0.063	0.011	1.9e-08	-0.0091	0.0066	0.1678	0.0443	0.0402	0.2709	0.0147562	0.932012
rs4841133	nonHDL	8	9183664	G	A	-0.0539	0.0026	94.7379	0.065	0.011	5.6e-09	-0.0125	0.0064	0.05016	0.0526	0.0403	0.1918	0.0144173	0.924099
rs17149279	logTG	8	9195638	C	T	-0.0176	0.0015	31.0655	0.03	0.0076	0.00011	0.0019	0.0045	0.6653	-0.0404	0.0275	0.1415	0.00267401	0.000246174
rs4645567	LDL	8	9723964	T	A	-0.0111	0.0015	12.8659	-0.0067	0.0077	0.39	-0.0008	0.0044	0.8535	0.0428	0.0286	0.1342	0.000520232	2.04966e-06
rs4645567	TC	8	9723964	T	A	-0.0109	0.0014	14.1591	-0.0067	0.0077	0.39	-0.0008	0.0044	0.8535	0.0428	0.0286	0.1342	0.000599693	8.269e-05
rs9657541	logTG	8	10643164	T	C	-0.0275	0.0016	65.4822	0.0023	0.008	0.77	0.0061	0.005	0.2216	0.0036	0.0287	0.8998	0.00266929	7.87759e-08
rs2409663	LDL	8	10643233	G	T	-0.0097	0.0013	13.0679	-0.041	0.0065	4.5e-10	-0.008	0.0038	0.03568	-0.0133	0.0233	0.5685	0.0134174	0.896125
rs4320509	logTG	8	11528339	C	G	-0.0295	0.002	48.5119	-0.0021	0.0097	0.83	-0.0096	0.0062	0.118	0.0218	0.0357	0.5419	0.0286196	3.60042e-06
rs709821	TC	8	11702594	C	G	-0.0124	0.0015	15.8609	0.014	0.0073	0.052	-0.0068	0.0047	0.1477	-0.0222	0.0261	0.395	0.00494038	0.000246163
rs9632849	logTG	8	13506575	A	G	-0.0095	0.0013	12.5658	-0.026	0.0066	7.1e-05	-0.0009	0.0038	0.8156	-0.0049	0.0243	0.8399	0.00148688	0.895852
rs1968041	logTG	8	17616562	C	T	-0.0089	0.0013	11.12	-0.02	0.0066	0.0025	-0.0061	0.0039	0.1197	-0.0181	0.024	0.4524	0.119678	0.227626
rs35246381	logTG	8	18272535	C	T	-0.0335	0.0014	125.811	-0.024	0.0076	0.0016	-0.0176	0.0042	3.087e-05	0.0101	0.0275	0.7145	0.0298159	0.406071
rs35570672	TC	8	18272635	T	C	-0.0297	0.0014	99.1519	-0.024	0.0076	0.0015	-0.0174	0.0042	3.643e-05	0.0076	0.0275	0.7834	0.0205285	0.386859
rs1495741	nonHDL	8	18272881	G	A	-0.0305	0.0017	71.2499	-0.024	0.0076	0.0019	-0.0172	0.0042	4.254e-05	0.0081	0.0273	0.7676	0.0224398	0.369145
rs1495743	LDL	8	18273300	G	C	-0.0185	0.0015	34.2225	-0.025	0.0076	0.0013	-0.0014	0.0852	0.9865	0.0074	0.0275	0.7877	0.0287517	0.41165
rs2958557	logTG	8	19251679	T	C	-0.0784	0.0083	20.4525	-0.0005	0.039	0.99	-0.0354	0.0273	0.1933	-0.0193	0.2413	0.9362	0.0169107	0.0243302
rs117199990	logTG	8	19820916	C	T	-0.1782	0.0021	1565.65	-0.069	0.011	1.3e-10	-0.0558	0.0061	7.244e-20	-0.0912	0.0379	0.01595	0.306203	0.441996
rs10096633	nonHDL	8	19830921	C	T	-0.0542	0.0022	133.288	-0.07	0.0098	8.7e-13	-0.0512	0.0052	1.404e-22	-0.0988	0.0342	0.003838	0.733636	0.997435
rs2616213	logTG	8	20610866	T	C	-0.0093	0.0013	12.0738	-0.014	0.0064	0.026	0.0022	0.0038	0.5658	-0.019	0.0235	0.4179	0.00168372	0.0483648
rs900776	LDL	8	21918089	A	C	-0.0198	0.0017	30.6243	-0.0079	0.0086	0.36	-0.0101	0.0051	0.04712	0.0033	0.0331	0.9213	0.00136268	0.00883154
rs900776	nonHDL	8	21918089	A	C	-0.0218	0.002	26.9383	-0.0079	0.0086	0.36	-0.0101	0.0051	0.04712	0.0033	0.0331	0.9213	0.00135601	0.008859
rs900776	TC	8	21918089	A	C	-0.0184	0.0016	29.8797	-0.0079	0.0086	0.36	-0.0101	0.0051	0.04712	0.0033	0.0331	0.9213	0.00136422	0.00882555
rs397950126	LDL	8	23358480	T	TG	-0.0074	0.0013	7.90193	na	na	na	na	na	na	na	na	na	0.0199156	0.013361
rs397950126	TC	8	23358480	T	TG	-0.0067	0.0013	6.59312	na	na	na	na	na	na	na	na	na	0.00333285	0.0123942
rs56193509	logTG	8	23525075	A	T	-0.0091	0.0014	10.0952	-0.011	0.0074	0.15	-0.0051	0.0042	0.2228	-0.007	0.0267	0.7943	0.00263256	0.0172721
rs11992444	logTG	8	25464690	G	T	-0.0111	0.0015	12.8659	-0.026	0.0068	0.00017	-0.0097	0.0047	0.0386	-0.0067	0.0261	0.7977	0.0108123	0.999251
rs7007256	logTG	8	26203081	A	G	-0.0095	0.0014	10.9374	-0.019	0.007	0.0056	0.0141	0.0042	0.0007573	0.0002	0.0256	0.995	0.386198	0.170645
rs117139027	LDL	8	29024943	G	A	-0.0803	0.0062	37.6381	0.012	0.029	0.67	0	0.0212	1	-0.1607	0.1191	0.1775	0.00907989	0.0199842
rs117139027	nonHDL	8	29024943	G	A	-0.0765	0.0081	20.447	0.012	0.029	0.67	0	0.0212	1	-0.1607	0.1191	0.1775	0.00907989	0.0199813
rs117139027	TC	8	29024943	G	A	-0.0692	0.0061	29.1013	0.012	0.029	0.67	0	0.0212	1	-0.1607	0.1191	0.1775	0.00907989	0.0199776
rs10096213	logTG	8	36853213	T	C	-0.0139	0.0016	17.4312	-0.034	0.0086	7.8e-05	-0.0129	0.0045	0.003766	-0.0295	0.0299	0.3236	0.157407	0.906982
rs4739514	logTG	8	37385495	A	C	-0.017	0.0024	11.8516	-0.05	0.015	0.001	-0.022	0.0066	0.0008392	-0.0786	0.058	0.1753	0.361101	0.97596
rs10958704	logTG	8	38328302	G	A	-0.0118	0.0013	18.952	-0.014	0.0064	0.025	-0.0116	0.0038	0.002336	-0.04	0.0235	0.08863	0.0932643	0.045855
rs34265667	TC	8	41542093	G	A	-0.0254	0.0037	11.1768	0.041	0.018	0.023	0.0106	0.012	0.3771	-0.0179	0.0664	0.7876	0.00641316	1.32855e-08
rs10104003	TC	8	55422440	T	C	-0.0231	0.0015	52.786	-0.01	0.0079	0.19	-0.025	0.0046	4.985e-08	0.0286	0.0287	0.3191	0.993327	0.0145089
rs9298506	LDL	8	55437524	G	A	-0.0234	0.0015	54.1379	-0.011	0.0079	0.17	-0.0254	0.0046	3.018e-08	0.0305	0.0287	0.2886	0.992586	0.0143485
rs28503706	nonHDL	8	55441799	G	A	-0.027	0.0018	50.1342	-0.011	0.0079	0.17	-0.0239	0.0046	2.09e-07	0.0312	0.0287	0.2775	0.99523	0.0146541
rs2081687	logTG	8	59388565	T	C	-0.022	0.0013	63.517	0.014	0.0067	0.044	-0.0019	0.004	0.6313	-0.0192	0.024	0.4236	0.00179929	0.0341213
rs9297994	LDL	8	59392324	G	A	-0.0349	0.0014	136.438	0.014	0.0067	0.035	-0.003	0.0041	0.465	-0.0234	0.0241	0.3313	0.0019085	0.0313663
rs9297994	nonHDL	8	59392324	G	A	-0.0393	0.0016	132.498	0.014	0.0067	0.035	-0.003	0.0041	0.465	-0.0234	0.0241	0.3313	0.0020979	0.0398322
rs9297994	TC	8	59392324	G	A	-0.0386	0.0013	193.015	0.014	0.0067	0.035	-0.003	0.0041	0.465	-0.0234	0.0241	0.3313	0.00210662	0.0312492
rs6471886	LDL	8	61409871	T	G	-0.0109	0.0013	16.2934	0.0042	0.0065	0.52	-0.0121	0.0037	0.001241	0.0081	0.0238	0.7332	0.201428	0.00612262
rs660865	logTG	8	61531713	T	A	-0.0094	0.0013	12.3185	0.0054	0.0065	0.41	-0.0101	0.0038	0.008154	0.0052	0.0238	0.8279	0.229023	0.00678662
rs615031	nonHDL	8	61539278	T	A	-0.0137	0.0015	19.1777	0.0058	0.0065	0.38	-0.0115	0.0038	0.002314	0.0023	0.0238	0.9218	0.223202	0.00658247
rs615031	TC	8	61539278	T	A	-0.0141	0.0012	31.1511	0.0058	0.0065	0.38	-0.0115	0.0038	0.002314	0.0023	0.0238	0.9218	0.215618	0.00660716
rs112067118	logTG	8	64622944	A	AT	-0.009	0.0018	6.24162	na	na	na	na	na	na	na	na	na	0.0131009	0.095096
rs745578	logTG	8	72466324	A	G	-0.0155	0.0014	27.7629	-0.027	0.0074	0.00029	-0.0088	0.0042	0.03668	-0.0219	0.027	0.416	0.0419105	0.774643
rs745578	nonHDL	8	72466324	A	G	-0.0112	0.0017	10.3516	-0.027	0.0074	0.00029	-0.0088	0.0042	0.03668	-0.0219	0.027	0.416	0.0199154	0.791015
rs2306486	LDL	8	74888494	C	T	-0.0145	0.0014	24.4107	-0.0017	0.0068	0.8	-0.0173	0.0042	3.604e-05	0.0486	0.0251	0.05232	0.532831	0.00904674
rs4385461	nonHDL	8	74899700	G	T	-0.0157	0.0016	22.0023	-0.0015	0.0068	0.83	-0.017	0.0042	4.425e-05	0.048	0.0251	0.05571	0.862913	0.00520299
rs4385461	TC	8	74899700	G	T	-0.0132	0.0013	23.4968	-0.0015	0.0068	0.83	-0.017	0.0042	4.425e-05	0.048	0.0251	0.05571	0.860083	0.00535559
rs400824	LDL	8	81357702	T	C	-0.0096	0.0014	11.1533	0.0027	0.007	0.7	0.0087	0.0043	0.04404	0.031	0.0255	0.2249	0.00998924	0.00561772
rs400824	TC	8	81357702	T	C	-0.0095	0.0014	10.9374	0.0027	0.007	0.7	0.0087	0.0043	0.04404	0.031	0.0255	0.2249	0.0134762	0.00566547
rs6473280	logTG	8	82404216	T	C	-0.0101	0.0014	12.2659	-0.017	0.0071	0.021	-0.0066	0.0043	0.1236	0.0002	0.0257	0.9925	0.00294739	0.166116
rs67057051	logTG	8	106433378	C	T	-0.0109	0.0015	12.4336	-0.022	0.0079	0.0055	0.0195	0.0044	1.086e-05	-0.0112	0.0286	0.6958	0.672193	0.0939543
rs13265978	logTG	8	116638975	C	T	-0.0204	0.0026	14.3676	-0.053	0.012	1.3e-05	-0.0183	0.0078	0.01839	-0.1257	0.0483	0.009263	0.00234253	0.00896535
rs2721961	LDL	8	116657911	T	G	-0.0232	0.0014	60.9503	-0.02	0.0071	0.0043	-0.0007	0.0041	0.8677	0.0333	0.0263	0.206	0.00197993	0.000957442
rs2737245	TC	8	116658583	G	T	-0.0276	0.0013	99.3041	-0.02	0.0072	0.006	-0.003	0.0042	0.4871	0.037	0.0264	0.1611	0.00207615	0.00104851
rs2737246	nonHDL	8	116659578	G	C	-0.0286	0.0016	70.7336	-0.02	0.0072	0.0066	-0.002	0.0042	0.6406	0.0366	0.0263	0.1644	0.00183764	0.00124625
rs10955992	TC	8	121872464	A	C	-0.0101	0.0013	14.1026	-0.017	0.0067	0.01	-0.0041	0.004	0.3031	0.0226	0.0247	0.36	0.00252493	0.117636
rs35360670	logTG	8	125756010	A	C	-0.0213	0.0032	10.5514	-0.017	0.015	0.26	-0.0175	0.0106	0.09891	-0.1268	0.0543	0.01961	0.014167	0.0219142
rs28601761	LDL	8	126500031	C	G	-0.0584	0.0013	439.972	0.003	0.0065	0.65	-0.0438	0.0039	5.838e-29	-0.1366	0.0234	5.406e-09	0.999988	0.00516081
rs28601761	logTG	8	126500031	C	G	-0.0834	0.0013	895.622	0.003	0.0065	0.65	-0.0438	0.0039	5.838e-29	-0.1366	0.0234	5.406e-09	5.14089e-05	0.0054456
rs28601761	nonHDL	8	126500031	C	G	-0.081	0.0015	635.032	0.003	0.0065	0.65	-0.0438	0.0039	5.838e-29	-0.1366	0.0234	5.406e-09	0.999988	0.00516164
rs28601761	TC	8	126500031	C	G	-0.0668	0.0012	674.735	0.003	0.0065	0.65	-0.0438	0.0039	5.838e-29	-0.1366	0.0234	5.406e-09	0.999988	0.00515997
rs1561929	logTG	8	129567373	T	C	-0.0143	0.002	12.0616	0.019	0.0099	0.05	0.0084	0.0062	0.1799	-0.0328	0.0399	0.4116	0.00612052	0.000204729
rs72691637	logTG	8	144306970	G	A	-0.0134	0.0016	16.2579	0.014	0.0091	0.11	0.0031	0.0049	0.5315	0.0052	0.03	0.8631	0.00216158	0.0230596
rs11781667	TC	8	145040856	T	G	-0.0197	0.0013	51.1459	0.017	0.0072	0.022	-0.0063	0.0041	0.1252	0.0095	0.024	0.6931	0.00635122	0.0420498
rs1134030	LDL	8	145051484	T	C	-0.0228	0.0014	58.9043	0.01	0.0067	0.13	-0.0077	0.0041	0.05887	0.0067	0.024	0.779	0.00406763	0.102312
rs1134030	nonHDL	8	145051484	T	C	-0.0228	0.0016	45.3484	0.01	0.0067	0.13	-0.0077	0.0041	0.05887	0.0067	0.024	0.779	0.00884912	0.0119142
rs1567353	logTG	9	1033773	G	C	-0.0113	0.0013	17.4496	-0.025	0.0068	0.00019	-0.0041	0.004	0.307	-0.0409	0.0251	0.1036	0.000693989	0.806643
rs2219143	logTG	9	2622278	G	A	-0.008	0.0014	7.95795	-0.022	0.0067	0.00094	0.0016	0.0042	0.6981	-0.0299	0.0251	0.2335	0.00227723	0.0394042
rs3780181	LDL	9	2640759	A	G	-0.0354	0.0023	52.7276	0.013	0.012	0.29	-0.0241	0.0068	0.0003942	-0.0097	0.0455	0.8321	0.558958	0.0151859
rs3780181	nonHDL	9	2640759	A	G	-0.0311	0.0028	27.9363	0.013	0.012	0.29	-0.0241	0.0068	0.0003942	-0.0097	0.0455	0.8321	0.558958	0.0151855
rs3780181	TC	9	2640759	A	G	-0.0325	0.0023	44.608	0.013	0.012	0.29	-0.0241	0.0068	0.0003942	-0.0097	0.0455	0.8321	0.558958	0.015182
rs77375493	TC	9	5073770	G	T	-0.3096	0.0451	11.1765	0.36	0.31	0.25	0.2283	0.114	0.04522	-1.19	1.2046	0.3232	0.179567	0.084269
rs2773513	logTG	9	6666512	T	A	-0.0135	0.0017	14.6984	-0.012	0.0093	0.21	0.0064	0.0051	0.2054	0.0175	0.0332	0.5985	0.00382112	0.0155899
rs820503	TC	9	6667928	A	C	-0.0124	0.0017	12.522	-0.011	0.0093	0.25	0.0042	0.0053	0.4261	0.017	0.0334	0.6111	0.00303308	0.0150549
rs1590404	logTG	9	13697152	A	C	-0.0105	0.0013	15.1777	-0.017	0.0065	0.0098	0.0184	0.0039	2.027e-06	-0.0518	0.0232	0.02528	0.852594	0.0970677
rs686030	logTG	9	15304782	A	C	-0.0159	0.0019	16.2336	0.03	0.0092	0.0011	0.0157	0.0057	0.006089	0.0251	0.0333	0.45	0.145765	0.49861
rs686030	TC	9	15304782	A	C	-0.025	0.0018	43.1309	0.03	0.0092	0.0011	0.0157	0.0057	0.006089	0.0251	0.0333	0.45	0.167376	0.480045
rs10810657	nonHDL	9	16884586	T	A	-0.0166	0.0015	27.7398	-0.0056	0.0065	0.39	-0.0166	0.0039	1.966e-05	-0.006	0.0239	0.8003	0.681004	0.00670125
rs28498684	LDL	9	16900695	A	G	-0.0137	0.0013	25.2409	-0.0043	0.0065	0.51	-0.0167	0.0039	1.848e-05	-0.0064	0.0237	0.7866	0.654019	0.00600469
rs28498684	TC	9	16900695	A	G	-0.013	0.0012	26.6211	-0.0043	0.0065	0.51	-0.0167	0.0039	1.848e-05	-0.0064	0.0237	0.7866	0.648495	0.00589469
rs62543565	logTG	9	16901067	C	A	-0.0144	0.0013	27.7895	-0.0058	0.0066	0.38	-0.0189	0.0038	7.008e-07	-0.0051	0.0242	0.8313	0.946733	0.00637026
rs34150222	nonHDL	9	19313913	G	A	-0.0303	0.0028	26.5646	-0.01	0.012	0.39	-0.013	0.0074	0.07703	0.0039	0.0419	0.9255	0.0137248	0.0163135
rs72700413	LDL	9	19323815	A	G	-0.0327	0.0024	41.5461	-0.011	0.012	0.35	-0.014	0.0072	0.05393	0.0042	0.0418	0.9199	0.022633	0.013384
rs10114039	TC	9	19352260	T	A	-0.0296	0.002	48.8342	-0.015	0.012	0.21	-0.0078	0.0062	0.2109	0.0134	0.0413	0.7454	0.0213459	0.0138917
rs10757273	TC	9	22090301	C	A	-0.0118	0.0013	18.952	na	na	na	na	na	na	na	na	na	0.855227	1.805e-14
rs1537373	LDL	9	22103341	T	G	-0.0116	0.0013	18.3434	0.029	0.0063	3.3e-06	na	na	na	0.0195	0.0232	0.4002	0.968899	4.79271e-14
rs1333047	nonHDL	9	22124504	A	T	-0.0112	0.0015	13.0849	0.037	0.0064	7.7e-09	na	na	na	0.0222	0.0232	0.3394	0.646678	1.34463e-08
rs17770336	logTG	9	28414625	T	C	-0.0095	0.0014	10.9374	-0.041	0.0068	2.1e-09	-0.0133	0.0041	0.001133	0.0001	0.0249	0.9963	0.134527	0.980334
rs12985	logTG	9	32450187	T	C	-0.0083	0.0013	9.7649	-0.019	0.0066	0.0037	-0.002	0.0039	0.5979	-0.0559	0.024	0.01966	0.00606174	0.306403
rs10971957	logTG	9	34151463	C	T	-0.0102	0.0013	14.3676	-0.013	0.0065	0.041	-0.0047	0.0038	0.2197	-0.0573	0.0234	0.01454	0.00184942	0.00139293
rs7864568	LDL	9	78212428	G	A	-0.0149	0.0014	25.7252	-0.0014	0.0068	0.84	-0.0069	0.0041	0.0899	-0.0074	0.0252	0.7689	0.0153332	0.00524339
rs7864568	TC	9	78212428	G	A	-0.0125	0.0013	21.1621	-0.0014	0.0068	0.84	-0.0069	0.0041	0.0899	-0.0074	0.0252	0.7689	0.00692699	0.00518483
rs2209915	nonHDL	9	78214833	G	A	-0.0151	0.0017	18.184	-0.0028	0.0069	0.69	-0.0086	0.0044	0.04967	-0.0074	0.0253	0.7697	0.00634262	0.00516693
rs1571791	LDL	9	78729213	T	C	-0.0119	0.0013	19.2601	-0.0097	0.0065	0.14	0.0035	0.0038	0.3597	-0.0165	0.0234	0.4807	0.00208871	0.0066864
rs1571791	nonHDL	9	78729213	T	C	-0.0134	0.0015	18.3837	-0.0097	0.0065	0.14	0.0035	0.0038	0.3597	-0.0165	0.0234	0.4807	0.00222265	0.0128652
rs1571791	TC	9	78729213	T	C	-0.0112	0.0012	19.9889	-0.0097	0.0065	0.14	0.0035	0.0038	0.3597	-0.0165	0.0234	0.4807	0.00221197	0.0121154
rs10868080	logTG	9	86626769	A	T	-0.0104	0.0014	12.9595	-0.027	0.0072	0.00024	0.0003	0.0041	0.9507	-0.0046	0.0263	0.8597	0.00197286	0.796785
rs62551047	LDL	9	91434086	G	A	-0.0197	0.0028	11.7028	0.0031	0.013	0.81	-0.0031	0.0088	0.7256	-0.0032	0.0466	0.9446	0.00393255	0.0089696
rs9410381	TC	9	91454519	C	T	-0.0183	0.0027	10.9135	-0.0007	0.013	0.96	-0.0041	0.0088	0.64	0.0034	0.0467	0.9424	0.00383702	0.00896788
rs1571535	logTG	9	92215734	C	T	-0.0102	0.0012	16.7222	-0.013	0.0063	0.037	-0.0126	0.0037	0.0007219	-0.0018	0.0232	0.9395	0.259359	0.0345234
rs10992409	logTG	9	95445032	C	G	-0.0098	0.0016	9.04247	-0.024	0.0085	0.0051	0.0044	0.0051	0.3891	-0.0287	0.0301	0.3405	0.00175605	0.206901
rs12004367	logTG	9	96970677	G	A	-0.0099	0.0014	11.8143	-0.036	0.0068	2e-07	-0.0072	0.0045	0.1056	0.0007	0.0252	0.9777	0.00466282	0.824446
rs4592135	TC	9	100640410	A	G	-0.0095	0.0015	9.61993	na	na	na	0.0067	0.0058	0.2454	na	na	na	0.0038019	0.156131
rs200675438	logTG	9	102119689	T	TA	-0.0106	0.0015	11.7994	na	na	na	na	na	na	na	na	na	0.003085	0.00929267
rs149360185	TC	9	106526397	C	A	-0.0572	0.0104	7.42046	0.021	0.048	0.67	0.0313	0.052	0.5473	0.0186	0.1894	0.9218	0.0165392	0.20509
rs186793936	TC	9	107093784	G	T	-0.1753	0.0192	19.1651	-0.056	0.09	0.54	0.0805	0.0483	0.09543	-0.0317	0.3873	0.9349	0.0373446	0.0478085
rs2740488	nonHDL	9	107661742	A	C	-0.0322	0.0017	79.2822	-0.0058	0.0072	0.42	-0.0238	0.0042	1.258e-08	0.0097	0.0261	0.7085	0.616245	0.00302305
rs2740488	TC	9	107661742	A	C	-0.0517	0.0013	345.136	-0.0058	0.0072	0.42	-0.0238	0.0042	1.258e-08	0.0097	0.0261	0.7085	0.42082	0.0030058
rs1883025	LDL	9	107664301	C	T	-0.0241	0.0014	65.683	-0.0083	0.0072	0.25	-0.025	0.0041	1.132e-09	0.0075	0.0261	0.7751	0.96097	0.00308779
rs1800978	logTG	9	107665978	C	G	-0.0248	0.0019	38.2119	-0.02	0.0098	0.042	-0.0372	0.0056	3.881e-11	-0.029	0.0345	0.3996	0.99608	0.0207978
rs16924584	TC	9	108179115	G	T	-0.0509	0.0048	25.5452	0.098	0.13	0.46	0.0076	0.0136	0.5748	0.2378	0.3193	0.4563	0.00338874	0.0674142
rs11789974	logTG	9	110488875	C	A	-0.027	0.0035	13.9148	-0.0075	0.018	0.68	-0.0218	0.0107	0.0426	-0.0612	0.0704	0.3848	6.91824e-08	0.0144124
rs1967604	TC	9	110530324	A	G	-0.0092	0.0013	11.8315	-0.0029	0.007	0.68	-0.0354	0.0042	5.66e-17	0.0172	0.0257	0.5041	0.997387	0.00557416
rs12000215	TC	9	112223059	A	G	-0.009	0.0013	11.3546	-0.0064	0.0068	0.35	0.0056	0.0039	0.1521	-0.0208	0.0248	0.4021	0.00350459	0.0165424
rs75113691	logTG	9	112245773	G	C	-0.0285	0.0031	19.4201	0.023	0.017	0.18	-0.0015	0.0083	0.8597	-0.086	0.0604	0.1541	0.0024131	0.0289297
rs397959160	nonHDL	9	112247790	G	GA	-0.0257	0.0035	12.6797	na	na	na	na	na	na	na	na	na	0.0026728	0.0264833
rs150611042	logTG	9	117083803	C	A	-0.0194	0.0028	11.3715	0.0029	0.013	0.82	-0.0075	0.0094	0.4266	0.0648	0.0493	0.1884	0.00465377	0.00676467
rs56294298	LDL	9	117133524	G	A	-0.0189	0.0026	12.4418	-0.011	0.012	0.36	0.0021	0.0085	0.8092	0.0307	0.044	0.4846	0.00326866	0.00689775
rs56294298	nonHDL	9	117133524	G	A	-0.0217	0.0029	13.138	-0.011	0.012	0.36	0.0021	0.0085	0.8092	0.0307	0.044	0.4846	0.00315773	0.00701175
rs10733608	TC	9	117148430	T	G	-0.0111	0.0012	19.6488	0.02	0.0064	0.0019	0.0014	0.0038	0.7194	0.078	0.023	0.0006925	0.00165939	0.258963
rs10984997	logTG	9	123481206	A	T	-0.0117	0.0013	18.6464	-0.017	0.0069	0.016	-0.008	0.004	0.04455	-0.0614	0.0253	0.01513	0.0153102	0.117942
rs80025019	TC	9	130758224	A	G	-0.0418	0.0046	18.992	-0.42	0.13	0.0012	-0.0029	0.0133	0.8276	0.3928	0.386	0.3089	0.00338621	0.580261
rs7874186	nonHDL	9	130770031	A	G	-0.0169	0.0031	7.30177	-0.0018	0.015	0.91	0.0013	0.0072	0.854	-0.023	0.0523	0.6604	0.0032126	0.563557
rs13289095	nonHDL	9	131466489	G	T	-0.0245	0.0023	25.7687	0.014	0.0095	0.13	-0.0076	0.0057	0.181	0.0164	0.0359	0.6478	0.0050215	0.0208258
rs13289095	TC	9	131466489	G	T	-0.0272	0.0018	50.8639	0.014	0.0095	0.13	-0.0076	0.0057	0.181	0.0164	0.0359	0.6478	0.00501767	0.0208503
rs9697210	LDL	9	131468740	G	A	-0.0293	0.0019	52.9275	0.014	0.0095	0.15	-0.0076	0.0057	0.1765	0.0167	0.0359	0.642	0.00524932	0.0193984
rs2519093	nonHDL	9	136141870	T	C	-0.0655	0.0019	259.701	-0.051	0.0082	5.9e-10	-0.0557	0.0046	3.543e-33	-0.0241	0.029	0.4047	0.990853	0.568611
rs2519093	TC	9	136141870	T	C	-0.0681	0.0015	449.331	-0.051	0.0082	5.9e-10	-0.0557	0.0046	3.543e-33	-0.0241	0.029	0.4047	0.99017	0.563412
rs507666	LDL	9	136149399	A	G	-0.0734	0.0016	458.75	-0.05	0.0082	9.3e-10	-0.0552	0.0046	9.891e-33	-0.0263	0.0289	0.3639	0.996924	0.663285
rs72619338	logTG	9	137175998	G	A	-0.0204	0.0039	6.77261	-0.028	0.022	0.21	-0.0397	0.0186	0.03282	0.0305	0.0779	0.6957	0.0479517	0.0609582
rs10858248	nonHDL	9	139108324	A	G	-0.0126	0.0015	16.3502	0.009	0.0067	0.18	-0.0058	0.0038	0.127	-0.0087	0.0232	0.7084	0.00297697	0.0137505
rs10858248	TC	9	139108324	A	G	-0.0119	0.0012	22.4531	0.009	0.0067	0.18	-0.0058	0.0038	0.127	-0.0087	0.0232	0.7084	0.00323198	0.0144332
rs11999532	LDL	9	139371405	G	C	-0.0155	0.0015	24.3028	-0.031	0.0073	2.6e-05	-0.0167	0.0045	0.0001762	-0.0118	0.0259	0.6469	0.73097	0.038858
rs6601924	TC	10	5247302	C	T	-0.0166	0.0017	21.797	-0.0018	0.0089	0.84	0.0012	0.0054	0.8209	0.0158	0.0323	0.6256	0.00223003	0.00661423
rs140107293	logTG	10	5267191	A	G	-0.0219	0.0018	33.3299	-0.0017	0.0089	0.85	0.0018	0.0055	0.7382	0.0141	0.0323	0.6624	0.00214533	0.00649439
rs263423	nonHDL	10	8089033	G	A	-0.0122	0.0019	9.86859	-0.016	0.0081	0.05	-0.0031	0.0048	0.52	0.0064	0.0295	0.8293	0.00213796	0.0315625
rs2388486	TC	10	8099021	C	T	-0.011	0.0016	11.2077	-0.015	0.0086	0.078	-0.0036	0.005	0.4725	0.0176	0.0312	0.5733	0.00223122	0.0311314
rs7903259	LDL	10	17259642	G	C	-0.0148	0.0013	29.302	0.0023	0.0064	0.72	0.0104	0.0038	0.005811	0.011	0.0233	0.6359	0.0466493	0.00487006
rs7903259	nonHDL	10	17259642	G	C	-0.0157	0.0015	24.9105	0.0023	0.0064	0.72	0.0104	0.0038	0.005811	0.011	0.0233	0.6359	0.0733361	0.00489189
rs7903259	TC	10	17259642	G	C	-0.0186	0.0012	53.4598	0.0023	0.0064	0.72	0.0104	0.0038	0.005811	0.011	0.0233	0.6359	0.0343322	0.0048809
rs4934932	logTG	10	33633866	A	G	-0.0175	0.002	17.6709	0.0017	0.011	0.88	0.0046	0.0058	0.4264	0.0649	0.0408	0.112	0.00286482	0.00824269
rs12354765	LDL	10	43918823	T	A	-0.0107	0.0016	10.6439	na	na	na	-0.0025	0.0054	0.6375	na	na	na	0.0108835	0.00533926
rs7908745	LDL	10	45953767	G	A	-0.0097	0.0013	13.0679	0.0098	0.0068	0.15	0.0081	0.004	0.04087	-0.0311	0.0246	0.2063	0.0106579	0.020755
rs11394256	nonHDL	10	45957247	CA	C	-0.0134	0.0019	11.7556	na	na	na	na	na	na	na	na	na	0.0144809	0.08264
rs2291428	TC	10	45958856	C	G	-0.0205	0.0014	47.8249	0.018	0.0074	0.013	0.0096	0.0045	0.03455	-0.0173	0.0268	0.5196	0.012193	0.116839
rs41274050	LDL	10	52573772	T	C	-0.0733	0.0076	21.2861	0.08	0.037	0.031	-0.0627	0.0221	0.004488	0.0239	0.1233	0.8461	0.298831	0.115826
rs41274050	logTG	10	52573772	T	C	-0.0891	0.0075	31.8228	0.08	0.037	0.031	-0.0627	0.0221	0.004488	0.0239	0.1233	0.8461	0.298879	0.115837
rs41274050	nonHDL	10	52573772	T	C	-0.0854	0.0093	19.3767	0.08	0.037	0.031	-0.0627	0.0221	0.004488	0.0239	0.1233	0.8461	0.298904	0.115843
rs41274050	TC	10	52573772	T	C	-0.0812	0.0073	28.0148	0.08	0.037	0.031	-0.0627	0.0221	0.004488	0.0239	0.1233	0.8461	0.298905	0.115838
rs1031101	TC	10	54533360	G	A	-0.0115	0.0017	10.8743	0.0016	0.0091	0.86	-0.0096	0.0053	0.06979	-0.0394	0.033	0.2323	0.00953172	0.00662907
rs11003128	LDL	10	54534837	T	A	-0.0119	0.0018	10.4186	0.0014	0.0091	0.88	-0.0082	0.0053	0.1209	-0.039	0.0329	0.2365	0.0100533	0.00662209
rs1171615	logTG	10	61469090	T	C	-0.0153	0.0015	23.7027	0.011	0.0076	0.16	-0.0122	0.0048	0.01129	-0.0098	0.0278	0.724	0.0402382	0.015015
rs2393729	logTG	10	63837016	C	T	-0.0106	0.0013	15.4528	-0.01	0.0064	0.12	-0.001	0.0038	0.7864	-0.024	0.0235	0.3054	0.00154318	0.0178459
rs10761750	LDL	10	65128619	A	G	-0.0146	0.0013	28.5407	0.018	0.0063	0.0037	-0.0021	0.0037	0.5742	0.0201	0.023	0.3828	0.00179791	0.0337919
rs7924036	logTG	10	65191645	G	T	-0.029	0.0013	109.507	-0.027	0.0063	2.7e-05	-0.0004	0.0038	0.9258	-0.0179	0.023	0.4366	0.00170218	0.0339359
rs1977825	TC	10	70409357	T	C	-0.0108	0.0018	8.70483	na	na	na	-0.0023	0.0059	0.6904	na	na	na	0.00269203	0.509606
rs17476364	LDL	10	71094504	T	C	-0.0265	0.0023	29.9892	-0.016	0.011	0.12	-0.0124	0.0071	0.08212	0.0323	0.0386	0.4023	0.0123389	0.0202867
rs17476364	nonHDL	10	71094504	T	C	-0.0257	0.0027	20.7553	-0.016	0.011	0.12	-0.0124	0.0071	0.08212	0.0323	0.0386	0.4023	0.0123668	0.0202311
rs17476364	TC	10	71094504	T	C	-0.0298	0.0022	41.0742	-0.016	0.011	0.12	-0.0124	0.0071	0.08212	0.0323	0.0386	0.4023	0.012352	0.0202605
rs11000443	LDL	10	74665640	C	A	-0.03	0.0028	26.0593	-0.021	0.015	0.17	-0.0408	0.0075	5.155e-08	-0.0737	0.0568	0.1947	0.92182	0.00553449
rs11000443	nonHDL	10	74665640	C	A	-0.0176	0.003	8.35199	-0.021	0.015	0.17	-0.0408	0.0075	5.155e-08	-0.0737	0.0568	0.1947	0.945505	0.00935643
rs7904738	logTG	10	74710484	C	G	-0.0237	0.002	31.6672	0.022	0.011	0.049	0.0242	0.0055	1.112e-05	0.1048	0.0428	0.01436	0.088041	0.0376539
rs7898735	TC	10	74712546	T	C	-0.013	0.0019	11.1077	-0.024	0.011	0.04	-0.0236	0.0055	1.758e-05	-0.106	0.0428	0.01325	0.966681	0.0192986
rs3012042	logTG	10	77257376	T	C	-0.0127	0.0018	11.7647	-0.047	0.0098	1.8e-06	0.0011	0.005	0.8179	-0.0241	0.0347	0.4867	0.0020306	0.974584
rs1782652	TC	10	81074125	A	T	-0.0106	0.0013	15.4528	0.022	0.0067	0.00099	0.0059	0.004	0.1414	0.0033	0.026	0.8994	0.00414807	7.76191e-12
rs11002931	logTG	10	81094251	C	A	-0.0104	0.0014	12.9595	0.029	0.0075	0.00014	0.0002	0.0042	0.9589	-0.0264	0.0294	0.369	0.00153345	4.23654e-06
rs7096909	nonHDL	10	82284512	T	A	-0.0132	0.002	10.386	-0.002	0.008	0.8	0.0318	0.0052	9.688e-10	0.0241	0.0287	0.4011	0.150592	0.00594154
rs7096909	TC	10	82284512	T	A	-0.011	0.0016	11.2077	-0.002	0.008	0.8	0.0318	0.0052	9.688e-10	0.0241	0.0287	0.4011	0.0989372	0.00599537
rs477418	LDL	10	89805410	C	A	-0.0235	0.0037	9.67074	0.019	0.018	0.28	-0.0173	0.0106	0.101	-0.0946	0.0614	0.1233	0.0155275	0.00138428
rs477418	nonHDL	10	89805410	C	A	-0.0329	0.0043	13.7008	0.019	0.018	0.28	-0.0173	0.0106	0.101	-0.0946	0.0614	0.1233	0.014532	0.00123857
rs477418	TC	10	89805410	C	A	-0.0248	0.0035	11.8591	0.019	0.018	0.28	-0.0173	0.0106	0.101	-0.0946	0.0614	0.1233	0.0146544	0.00148364
rs1412445	LDL	10	91002804	C	T	-0.0083	0.0013	9.7649	-0.011	0.0067	0.12	0.0505	0.0039	2.073e-38	-0.0093	0.0244	0.7037	0.989673	0.0245172
rs2250398	nonHDL	10	91010157	A	G	-0.0101	0.0015	10.7804	-0.012	0.0063	0.056	0.041	0.0039	1.994e-26	-0.0016	0.0231	0.9459	0.764012	0.027966
rs1332326	TC	10	91011692	T	G	-0.0106	0.0012	17.9931	-0.012	0.0064	0.062	0.0414	0.0039	6.605e-26	-0.0012	0.0233	0.9577	0.717158	0.0268779
rs144316780	logTG	10	93622950	T	TGTTTTTTCA	-0.0249	0.0029	17.0463	na	na	na	-0.0021	0.0102	0.8376	na	na	na	0.00360047	0.341949
rs201503938	logTG	10	94215014	CTTGA	C	-0.0243	0.0024	23.3686	na	na	na	na	na	na	na	na	na	0.00345868	1.46986e-08
rs2068888	LDL	10	94839642	G	A	-0.0169	0.0013	37.9124	0.0039	0.0064	0.54	-0.0134	0.0037	0.0003457	-0.0299	0.0229	0.1921	0.363661	0.00498041
rs4418728	logTG	10	94839724	G	T	-0.0294	0.0013	112.514	0.0042	0.0064	0.51	-0.0131	0.0037	0.0004426	-0.0281	0.0232	0.2259	0.332884	0.00506496
rs4418728	nonHDL	10	94839724	G	T	-0.0249	0.0015	61.1568	0.0042	0.0064	0.51	-0.0131	0.0037	0.0004426	-0.0281	0.0232	0.2259	0.364743	0.00497766
rs4418728	TC	10	94839724	G	T	-0.0174	0.0012	46.9167	0.0042	0.0064	0.51	-0.0131	0.0037	0.0004426	-0.0281	0.0232	0.2259	0.365684	0.00497457
rs7091593	logTG	10	95342772	T	A	-0.0159	0.002	14.7293	0.0053	0.01	0.6	-0.0015	0.0057	0.7943	-0.0376	0.0373	0.3133	0.00226844	0.011784
rs3891783	logTG	10	96015793	C	G	-0.0106	0.0012	17.9931	-0.0025	0.0064	0.7	0.0127	0.0037	0.000624	0.019	0.0231	0.4093	0.00262885	0.00509328
rs57866767	TC	10	96023077	T	C	-0.0123	0.0012	23.9269	-0.0027	0.0064	0.68	0.0127	0.0037	0.0005916	0.0188	0.0231	0.4161	0.00765768	0.00513075
rs61886339	LDL	10	96032866	T	C	-0.0101	0.0014	12.2659	0.0005	0.0069	0.94	0.0232	0.0042	2.408e-08	0.003	0.0249	0.9035	0.958364	0.00563115
rs11187838	nonHDL	10	96038686	G	A	-0.0113	0.0015	13.3057	-0.0016	0.0064	0.8	0.0121	0.0037	0.0009942	0.0216	0.023	0.3474	0.0124131	0.00508862
rs1408579	logTG	10	101912194	T	C	-0.01	0.0013	13.8401	0.032	0.0063	5.3e-07	0.001	0.0041	0.8059	0.0513	0.0231	0.0261	0.0015245	0.99064
rs17668357	nonHDL	10	102003906	C	G	-0.0129	0.0016	15.1264	0.03	0.0064	2.8e-06	0.0001	0.0043	0.9876	0.0574	0.0233	0.01361	0.998175	0.885738
rs17668357	TC	10	102003906	C	G	-0.016	0.0013	34.0844	0.03	0.0064	2.8e-06	0.0001	0.0043	0.9876	0.0574	0.0233	0.01361	2.95653e-06	0.926666
rs603424	LDL	10	102075479	A	G	-0.0154	0.0017	18.8799	-0.017	0.0086	0.051	-0.0317	0.0051	4.076e-10	-0.0355	0.0296	0.2303	0.999997	0.00474986
rs1057050	logTG	10	104142294	G	A	-0.0276	0.0027	23.8022	0.035	0.013	0.0082	0.0092	0.0086	0.2844	-0.0232	0.0476	0.6258	0.00609376	0.243449
rs2803619	logTG	10	113934384	C	G	-0.0175	0.0014	35.127	-0.024	0.0071	0.00071	0.005	0.0042	0.2409	0.0684	0.0258	0.007921	0.00316918	0.538447
rs2803619	TC	10	113934384	G	C	-0.027	0.0013	95.0853	0.024	0.0071	0.00071	-0.005	0.0042	0.2409	-0.0684	0.0258	0.007921	0.00318114	0.560761
rs2792751	LDL	10	113940329	T	C	-0.0253	0.0014	72.2716	0.024	0.0071	0.00074	-0.0053	0.0042	0.2116	-0.067	0.0254	0.008262	0.00338486	0.540269
rs10787429	nonHDL	10	113949664	T	C	-0.0178	0.0017	24.9285	0.023	0.007	0.0012	-0.0054	0.0044	0.2196	-0.0707	0.0258	0.00625	0.0030797	0.546619
rs7094463	TC	10	114711983	G	A	-0.0102	0.0012	16.7222	-0.02	0.0063	0.0019	0.0041	0.0037	0.2636	-0.0392	0.023	0.08799	2.554e-06	2.18327e-11
rs72823013	nonHDL	10	115786233	G	A	-0.0206	0.0025	15.7639	0.017	0.0099	0.085	0.0023	0.0065	0.7233	-0.0589	0.0363	0.1047	0.00212441	0.00163665
rs17875424	LDL	10	115798268	TAA	T	-0.0148	0.0022	10.7623	na	na	na	-0.0019	0.0076	0.8051	na	na	na	0.00218752	0.0016085
rs1801253	logTG	10	115805056	G	C	-0.0107	0.0014	13.6727	-0.031	0.0072	1.9e-05	0.0112	0.0043	0.008755	0.0049	0.0261	0.8521	0.129964	0.833434
rs4751996	LDL	10	118397894	G	A	-0.0158	0.0013	33.2618	-0.015	0.0063	0.02	-0.0171	0.0037	4.108e-06	-0.0152	0.023	0.5084	0.631982	0.0732857
rs4751996	TC	10	118397894	G	A	-0.0126	0.0012	25.0636	-0.015	0.0063	0.02	-0.0171	0.0037	4.108e-06	-0.0152	0.023	0.5084	0.457503	0.0640335
rs7910135	nonHDL	10	118398046	A	C	-0.017	0.0015	29.0471	-0.015	0.0063	0.022	-0.0173	0.0037	3.071e-06	-0.0156	0.023	0.4966	0.500244	0.0659673
rs12772930	logTG	10	120493295	A	G	-0.01	0.0014	12.039	-0.025	0.0066	0.0002	-0.0091	0.0042	0.03067	0.0142	0.0242	0.5572	0.014964	0.860825
rs2289307	TC	10	121582556	T	C	-0.0093	0.0013	12.0738	-0.0034	0.0068	0.62	0.0007	0.004	0.8529	0.0125	0.0244	0.6084	0.0016414	0.00464732
rs73362918	TC	10	122853958	T	G	-0.0133	0.0019	11.5918	0.018	0.011	0.11	0.0031	0.0055	0.5804	-0.0032	0.0399	0.937	3.491e-07	0.00241076
rs10886863	logTG	10	122929493	C	T	-0.0284	0.0027	25.1489	-0.068	0.021	0.0016	-0.0358	0.0069	1.955e-07	-0.1069	0.0772	0.1661	0.187678	0.14397
rs7904973	LDL	10	124693587	T	G	-0.0202	0.0013	53.7201	-0.0038	0.0064	0.56	-0.0093	0.0037	0.0121	0.0273	0.0234	0.2426	0.0351038	0.00554329
rs7904973	nonHDL	10	124693587	T	G	-0.0195	0.0015	37.9124	-0.0038	0.0064	0.56	-0.0093	0.0037	0.0121	0.0273	0.0234	0.2426	0.0315109	0.00550059
rs7904973	TC	10	124693587	T	G	-0.0192	0.0012	56.8936	-0.0038	0.0064	0.56	-0.0093	0.0037	0.0121	0.0273	0.0234	0.2426	0.0544585	0.00582618
rs1133400	logTG	10	134459388	G	A	-0.0121	0.0015	15.1412	-0.018	0.008	0.023	0.0015	0.0045	0.7434	-0.0284	0.0281	0.3125	0.0013312	0.0681421
rs566663060	logTG	10	135436812	C	CGCTTTCCTCTCT	-0.0252	0.0041	9.10078	na	na	na	na	na	na	na	na	na	0.00392937	0.0158546
rs117291242	logTG	11	380315	T	C	-0.0244	0.0037	10.3702	0.033	0.018	0.077	0.0372	0.0126	0.003198	-0.0883	0.0664	0.1839	0.167923	0.0505399
rs151191319	LDL	11	1081287	G	A	-0.03	0.0038	14.5362	-0.018	0.018	0.32	-0.031	0.0125	0.01302	0.0155	0.0679	0.8196	0.0910644	0.0188993
rs1661052	TC	11	2942593	A	G	-0.0216	0.0021	24.0876	-0.026	0.011	0.022	-0.0222	0.0067	0.0008745	-0.0157	0.0398	0.6936	0.44455	1.02651e-20
rs188513096	LDL	11	4993424	T	A	-0.1919	0.0253	13.4782	0.093	0.12	0.45	na	na	na	0.5042	0.5201	0.3324	0.00113568	0.0519699
rs188513096	nonHDL	11	4993424	T	A	-0.1805	0.0278	10.0744	0.093	0.12	0.45	na	na	na	0.5042	0.5201	0.3324	0.00114407	0.0519776
rs11549407	TC	11	5248004	G	A	-0.4299	0.0326	38.9826	0.31	0.22	0.17	na	na	na	1.092	0.8578	0.203	0.0197957	0.0929966
rs11601507	LDL	11	5701074	A	C	-0.0415	0.0028	48.9727	-0.014	0.013	0.26	-0.0515	0.0074	2.803e-12	0.0161	0.0455	0.7233	1	0.0167379
rs11601507	nonHDL	11	5701074	A	C	-0.0413	0.0034	33.2257	-0.014	0.013	0.26	-0.0515	0.0074	2.803e-12	0.0161	0.0455	0.7233	1	0.0167406
rs189043145	TC	11	6092869	A	G	-0.0053	0.0098	0.230155	na	na	na	0.0248	0.0469	0.5978	na	na	na	0.000922628	0.00364869
rs11042906	logTG	11	10665235	C	T	-0.0138	0.0015	19.4462	-0.02	0.007	0.0043	-0.0182	0.0047	0.0001109	-0.0049	0.0257	0.8487	0.167572	0.526053
rs11022130	TC	11	12071547	G	A	-0.0095	0.0014	10.9374	0.013	0.0073	0.068	0.0085	0.0045	0.05848	0.0344	0.0271	0.2043	0.00960321	0.0272485
rs10765918	nonHDL	11	12071855	G	A	-0.0111	0.0017	10.1803	0.013	0.0072	0.069	0.0042	0.0042	0.3193	0.0423	0.0266	0.1114	0.00440924	0.0256727
rs6486122	logTG	11	13361524	T	C	-0.017	0.0013	38.3505	-0.017	0.0068	0.012	-0.0182	0.004	6.066e-06	-0.0116	0.0246	0.6364	1.09233e-05	0.102818
rs1528662	logTG	11	13970901	G	T	-0.0243	0.0039	9.33334	0.011	0.0087	0.2	-0.0027	0.0049	0.5721	-0.0911	0.063	0.148	0.478227	0.0155501
rs150090666	logTG	11	14865399	C	T	-0.3025	0.0249	33.2339	-0.21	0.13	0.1	-0.1343	0.0974	0.1677	-0.3556	0.4489	0.4283	0.0772557	0.0110707
rs150090666	nonHDL	11	14865399	C	T	-0.2073	0.0317	10.2093	-0.21	0.13	0.1	-0.1343	0.0974	0.1677	-0.3556	0.4489	0.4283	0.0772493	0.0112496
rs214080	TC	11	17299762	G	A	-0.0098	0.0012	15.4989	-0.025	0.0065	0.00017	-0.0071	0.0038	0.0621	0.0014	0.0235	0.9529	0.00863513	3.89384e-10
rs10832954	nonHDL	11	18643559	A	G	-0.0205	0.0016	36.8552	0.0093	0.0072	0.2	-0.0057	0.0041	0.1582	0.0217	0.0262	0.4078	0.00427053	0.0119703
rs10832954	TC	11	18643559	A	G	-0.0194	0.0013	49.6322	0.0093	0.0072	0.2	-0.0057	0.0041	0.1582	0.0217	0.0262	0.4078	0.00422965	0.0121472
rs10832956	LDL	11	18645668	C	T	-0.0193	0.0014	42.5077	0.0092	0.0071	0.2	-0.0058	0.0041	0.1505	0.0207	0.0262	0.4304	0.0046156	0.0114527
rs72887658	logTG	11	26197972	T	A	-0.0206	0.0027	13.6281	-0.05	0.013	0.00015	-0.0255	0.0087	0.003259	-0.0678	0.0476	0.1549	0.202707	0.775507
rs1519480	logTG	11	27675712	C	T	-0.0142	0.0013	27.0486	-0.032	0.0068	2.4e-06	-0.014	0.004	0.0004599	-0.009	0.0246	0.7135	0.0158747	0.980734
rs75160368	logTG	11	30402714	G	A	-0.0165	0.0024	11.2077	-0.011	0.011	0.31	-0.0173	0.0078	0.02738	-0.046	0.0413	0.2651	0.141099	0.0484024
rs61884130	TC	11	46241757	C	T	-0.0336	0.004	16.3502	-0.027	0.019	0.15	0.0138	0.0129	0.2858	0.0758	0.0688	0.2705	0.00774314	0.0181956
rs149903077	nonHDL	11	46349696	G	T	-0.0601	0.0086	11.5558	-0.043	0.034	0.2	0.0216	0.0344	0.5306	-0.0899	0.1166	0.4407	0.0122715	0.0429095
rs3758669	logTG	11	47272579	A	G	-0.0227	0.0013	67.5509	-0.0053	0.0069	0.45	-0.0021	0.004	0.5894	-0.0092	0.0249	0.7126	0.00145696	0.00612956
rs1631174	LDL	11	47974373	A	C	-0.0099	0.0014	11.8143	-0.0062	0.0071	0.39	-0.0061	0.004	0.1322	0.0294	0.0244	0.2286	0.00554141	0.000111819
rs34895872	TC	11	48021778	G	A	-0.0175	0.0014	35.127	-0.019	0.0073	0.009	-0.0025	0.0043	0.564	0.0091	0.0264	0.7307	0.00107628	0.00518754
rs4619163	logTG	11	56119093	T	C	-0.0204	0.003	10.9804	-0.017	0.014	0.22	-0.016	0.0098	0.1014	-0.0763	0.0499	0.1267	0.0126063	0.443899
rs75230704	TC	11	56225592	A	G	-0.0288	0.0036	14.9051	0.0062	0.016	0.7	-0.0119	0.0139	0.3941	-0.0865	0.0604	0.1519	0.00569878	0.010078
rs10792091	logTG	11	57119156	C	T	-0.0132	0.002	10.386	-0.0079	0.0092	0.39	0.0019	0.0062	0.7556	-0.0097	0.0337	0.7725	0.00262308	0.00959684
rs950802	TC	11	60152584	G	A	-0.0097	0.0013	13.0679	0.0053	0.0068	0.44	-0.0033	0.0039	0.3944	-0.0424	0.0246	0.08468	0.00152732	0.00652776
rs174564	LDL	11	61588305	A	G	-0.0423	0.0014	199.813	-0.028	0.0066	2.3e-05	-0.0012	0.004	0.7619	0.0215	0.0242	0.376	0.00151316	0.885161
rs174564	logTG	11	61588305	G	A	-0.0513	0.0013	339.839	0.028	0.0066	2.3e-05	0.0012	0.004	0.7619	-0.0215	0.0242	0.376	0.00161643	0.931206
rs174564	nonHDL	11	61588305	A	G	-0.0335	0.0016	96.6127	-0.028	0.0066	2.3e-05	-0.0012	0.004	0.7619	0.0215	0.0242	0.376	0.00162027	0.903228
rs174564	TC	11	61588305	A	G	-0.0406	0.0013	213.39	-0.028	0.0066	2.3e-05	-0.0012	0.004	0.7619	0.0215	0.0242	0.376	0.00160624	0.934697
rs11231161	logTG	11	62378221	G	A	-0.0108	0.0014	13.9148	-0.006	0.0067	0.37	-0.001	0.0042	0.8141	-0.0042	0.0239	0.8605	0.00177984	0.00941204
rs10751001	LDL	11	63615561	T	C	-0.0113	0.0013	17.4496	-0.0015	0.0066	0.82	0.0081	0.0041	0.04626	-0.0139	0.0241	0.5643	0.0132848	0.00411912
rs10897459	TC	11	63659778	C	T	-0.0105	0.0013	15.1777	-0.0016	0.0065	0.81	0.0089	0.0041	0.02834	-0.0122	0.0241	0.6131	0.0125391	0.00581076
rs11605500	nonHDL	11	63669411	G	A	-0.011	0.0015	12.6488	0.0006	0.0064	0.93	0.0119	0.0039	0.002474	0.0026	0.0236	0.9131	0.11901	0.0039778
rs56271783	logTG	11	64004723	C	G	-0.0536	0.0032	62.247	-0.068	0.016	2.9e-05	-0.027	0.0102	0.008181	-0.1873	0.057	0.001012	0.106951	0.966869
rs117073213	TC	11	64162955	G	A	-0.0226	0.0035	9.97184	-0.042	0.017	0.015	-0.0374	0.0119	0.001696	-0.0667	0.0646	0.3017	0.253546	0.16243
rs10896018	TC	11	65351074	A	G	-0.0108	0.0013	16.0106	0.012	0.0071	0.1	0.028	0.0042	2.453e-11	0.0523	0.0264	0.04725	0.14095	2.2635e-08
rs10750766	logTG	11	65473798	A	C	-0.0146	0.0013	28.5407	-0.035	0.007	4.7e-07	-0.0257	0.004	1.581e-10	-0.0734	0.0255	0.004056	0.917855	0.944202
rs7119612	LDL	11	65570517	T	C	-0.0143	0.002	12.0616	0.036	0.011	0.0012	0.0081	0.0055	0.143	0.0331	0.0416	0.4271	0.237595	0.00781528
rs10501397	TC	11	66272976	C	A	-0.0125	0.0014	18.365	-0.012	0.0073	0.1	0.0002	0.0043	0.9639	-0.0151	0.0268	0.5732	0.00189355	0.0209535
rs11822028	nonHDL	11	66288123	T	C	-0.0137	0.0017	15.1133	-0.012	0.0073	0.1	0.0009	0.0043	0.8398	-0.0133	0.0268	0.6191	0.00172129	0.0208582
rs57596493	LDL	11	66302743	C	T	-0.0138	0.0015	19.4462	-0.013	0.0075	0.083	0.0005	0.0044	0.9072	-0.0173	0.0269	0.5191	0.00203303	0.0220709
rs4365062	logTG	11	68613864	C	T	-0.0138	0.0013	25.5973	0.019	0.0064	0.0033	-0.0004	0.0038	0.9147	-0.0201	0.0231	0.3848	0.00141268	0.246259
rs10796821	logTG	11	69305417	G	A	-0.009	0.0013	11.3546	-0.0004	0.0064	0.95	-0.0053	0.0039	0.1776	0.0023	0.0232	0.9217	0.0039403	0.00351067
rs72997616	TC	11	75474195	C	A	-0.0237	0.0019	34.9833	0.0061	0.011	0.57	0.0246	0.0057	1.545e-05	-0.0414	0.0383	0.2796	0.929197	0.00923065
rs10899485	logTG	11	78072383	T	C	-0.012	0.0016	13.1951	-0.0088	0.0087	0.31	-0.019	0.0044	1.875e-05	0.0217	0.0306	0.4785	0.860441	0.00887738
rs11237469	TC	11	78072875	A	T	-0.0119	0.0016	12.9888	-0.0084	0.0087	0.33	-0.0219	0.0048	4.058e-06	0.0241	0.0308	0.4354	0.891716	0.00998153
rs7933222	TC	11	95298828	T	A	-0.0102	0.0015	10.9804	0.019	0.008	0.019	0.0091	0.0047	0.05328	-0.0064	0.0296	0.8285	0.0153837	0.458461
rs145567604	nonHDL	11	103870621	ATCTTG	A	-0.0131	0.002	10.2401	na	na	na	0.0171	0.006	0.004487	na	na	na	0.140334	0.00976968
rs11226108	LDL	11	103870755	G	C	-0.0147	0.0017	17.277	0.0022	0.0082	0.79	-0.0172	0.0051	0.0007008	0.025	0.0296	0.3987	0.430709	0.00657877
rs11226108	TC	11	103870755	G	C	-0.0144	0.0016	18.6464	0.0022	0.0082	0.79	-0.0172	0.0051	0.0007008	0.025	0.0296	0.3987	0.326847	0.00828823
rs10891052	TC	11	109957826	G	A	-0.0069	0.0012	8.04942	0.005	0.0063	0.43	0.0007	0.0038	0.8524	-0.002	0.0233	0.9324	0.00563353	0.00735505
rs112125399	logTG	11	111623694	A	AAAAC	-0.0102	0.0014	12.4949	na	na	na	na	na	na	na	na	na	3.33284e-05	0.00518196
rs10891588	logTG	11	113579598	T	C	-0.0065	0.0023	2.32679	-0.021	0.014	0.14	0.0011	0.0061	0.8521	0.0299	0.0498	0.5475	0.00340034	0.0234095
rs10891789	logTG	11	114850006	T	C	-0.0032	0.0013	1.85904	0.0062	0.0066	0.35	0.0004	0.004	0.9193	0.044	0.0246	0.07341	0.0012413	0.00732711
rs117288140	logTG	11	116139965	T	C	-0.0385	0.0055	11.5918	-0.016	0.026	0.55	0.0082	0.0178	0.6436	-0.0406	0.1006	0.6866	0.00613932	0.202216
rs964184	LDL	11	116648917	G	C	-0.0405	0.0017	124.72	-0.022	0.0093	0.016	-0.0517	0.0049	4.716e-26	-0.0329	0.0328	0.3153	1	0.0309234
rs964184	logTG	11	116648917	G	C	-0.225	0.0017	3806.05	-0.022	0.0093	0.016	-0.0517	0.0049	4.716e-26	-0.0329	0.0328	0.3153	1	0.0309223
rs964184	nonHDL	11	116648917	G	C	-0.1244	0.002	842	-0.022	0.0093	0.016	-0.0517	0.0049	4.716e-26	-0.0329	0.0328	0.3153	1	0.0309236
rs964184	TC	11	116648917	G	C	-0.0844	0.0016	606.046	-0.022	0.0093	0.016	-0.0517	0.0049	4.716e-26	-0.0329	0.0328	0.3153	1	0.0309211
rs192489212	LDL	11	117220429	A	C	-0.1454	0.0196	12.926	0.15	0.095	0.13	-0.0292	0.0709	0.6798	0.4447	0.3757	0.2365	0.189048	0.0771043
rs192489212	logTG	11	117220429	A	C	-0.8949	0.0194	463.824	0.15	0.095	0.13	-0.0292	0.0709	0.6798	0.4447	0.3757	0.2365	0.0144486	0.0763247
rs747437837	logTG	11	117849058	C	G	-0.4135	0.0512	15.175	0.26	0.17	0.12	na	na	na	0.1451	0.7405	0.8447	0.00339917	0.0713807
rs17122278	LDL	11	118449370	G	A	-0.0187	0.0018	24.5551	-0.017	0.0095	0.071	-0.0009	0.0053	0.8655	0.0096	0.0353	0.7864	0.00178012	0.0312693
rs73023350	TC	11	118449396	A	G	-0.0181	0.0016	28.9439	-0.016	0.0094	0.08	-0.0023	0.005	0.6481	0.0102	0.0352	0.7728	0.00204032	0.0280883
rs11216909	nonHDL	11	118449746	T	C	-0.016	0.002	14.9051	-0.016	0.0095	0.083	-0.0016	0.005	0.7411	0.0092	0.0351	0.7929	0.00199614	0.0313952
rs510435	TC	11	118980039	C	T	-0.008	0.0013	9.12133	0.0063	0.0067	0.35	-0.0013	0.0039	0.7476	0.0104	0.0238	0.6619	0.000642827	0.0149879
rs748962992	logTG	11	119834755	G	T	-0.158	0.0303	6.73449	0.13	0.11	0.23	na	na	na	0.4221	0.493	0.3919	0.0786812	0.0463202
rs772703454	logTG	11	120559994	C	A	-0.1647	0.0359	5.34866	-0.0088	0.13	0.95	na	na	na	-0.899	0.6464	0.1643	0.000497545	0.020111
rs3862606	LDL	11	121330087	G	A	-0.0086	0.0013	10.4311	0.0039	0.0064	0.54	0.0028	0.0039	0.464	0.0124	0.0237	0.6021	0.00164871	0.00588346
rs7930518	LDL	11	122523596	A	G	-0.0155	0.0013	32.0471	-0.0061	0.0065	0.35	-0.0189	0.0038	7.038e-07	-0.0148	0.0238	0.5327	0.278925	0.0092997
rs7930518	TC	11	122523596	A	G	-0.0216	0.0012	71.7104	-0.0061	0.0065	0.35	-0.0189	0.0038	7.038e-07	-0.0148	0.0238	0.5327	0.240345	0.0073771
rs7129071	nonHDL	11	122527120	A	G	-0.0164	0.0015	27.0977	-0.0059	0.0066	0.37	-0.0196	0.004	7.981e-07	-0.008	0.0239	0.7379	0.280478	0.00705833
rs112771035	LDL	11	126225876	G	C	-0.0622	0.0025	135.912	0.029	0.013	0.021	-0.0364	0.0071	2.598e-07	0.0236	0.0455	0.6031	0.757536	0.0876216
rs112771035	nonHDL	11	126225876	G	C	-0.0597	0.0028	100.144	0.029	0.013	0.021	-0.0364	0.0071	2.598e-07	0.0236	0.0455	0.6031	0.757536	0.0876317
rs74612335	TC	11	126238633	C	T	-0.0341	0.0017	88.772	0.018	0.0095	0.056	-0.0211	0.0051	3.817e-05	-0.0195	0.0336	0.5615	0.0184376	0.0301627
rs2369280	logTG	12	508859	G	T	-0.0093	0.0015	9.24823	-0.027	0.0072	0.00022	0.0166	0.0045	0.0002092	-0.0178	0.0265	0.5003	0.938342	0.70834
rs35882350	LDL	12	623129	G	A	-0.0182	0.0015	33.1529	0.011	0.0073	0.15	-0.0242	0.0048	3.709e-07	-0.0327	0.0283	0.248	0.990916	0.0118204
rs35882350	nonHDL	12	623129	G	A	-0.0216	0.0018	32.4494	0.011	0.0073	0.15	-0.0242	0.0048	3.709e-07	-0.0327	0.0283	0.248	0.997139	0.0133756
rs35882350	TC	12	623129	G	A	-0.0164	0.0015	27.0977	0.011	0.0073	0.15	-0.0242	0.0048	3.709e-07	-0.0327	0.0283	0.248	0.993238	0.0121085
rs76895963	LDL	12	4384844	T	G	-0.0543	0.0055	22.2623	-0.48	0.027	5.3e-70	-0.0474	0.019	0.01254	-0.0257	0.098	0.7935	0.116631	1
rs76895963	logTG	12	4384844	T	G	-0.1021	0.0055	76.1988	-0.48	0.027	5.3e-70	-0.0474	0.019	0.01254	-0.0257	0.098	0.7935	0.116631	1
rs76895963	nonHDL	12	4384844	T	G	-0.0754	0.0063	32.283	-0.48	0.027	5.3e-70	-0.0474	0.019	0.01254	-0.0257	0.098	0.7935	0.116631	1
rs76895963	TC	12	4384844	T	G	-0.0729	0.0053	42.3214	-0.48	0.027	5.3e-70	-0.0474	0.019	0.01254	-0.0257	0.098	0.7935	0.116631	1
rs35104374	logTG	12	6739497	T	C	-0.0102	0.0015	10.9804	-0.034	0.0073	4.2e-06	-0.015	0.0049	0.002229	-0.0286	0.0275	0.2972	0.172785	0.882821
rs117692263	nonHDL	12	7625014	T	C	-0.0178	0.0026	11.12	-0.01	0.012	0.37	-0.0088	0.0069	0.1999	-0.0185	0.0418	0.6592	0.0117028	0.0124055
rs4883201	LDL	12	9082581	A	G	-0.0243	0.002	33.2413	-0.0018	0.01	0.86	-0.0044	0.0058	0.4494	0.0779	0.038	0.04013	0.00281458	0.00764004
rs4883201	nonHDL	12	9082581	A	G	-0.0246	0.0023	25.972	-0.0018	0.01	0.86	-0.0044	0.0058	0.4494	0.0779	0.038	0.04013	0.00281399	0.00764067
rs4883201	TC	12	9082581	A	G	-0.0319	0.0019	62.5355	-0.0018	0.01	0.86	-0.0044	0.0058	0.4494	0.0779	0.038	0.04013	0.00281391	0.00763846
rs11045171	logTG	12	20470199	A	G	-0.0195	0.0016	33.4409	-0.019	0.0081	0.018	-0.0091	0.0049	0.06369	-0.0309	0.0292	0.2903	0.00745284	0.0486911
rs73079476	logTG	12	21343833	C	A	-0.0263	0.0017	53.2612	0.0085	0.0088	0.33	0.0157	0.0052	0.002428	0.0191	0.0316	0.5462	0.144673	0.0103148
rs11046481	logTG	12	22747967	T	G	-0.0155	0.0016	21.4675	-0.004	0.0075	0.6	-0.003	0.0052	0.569	0.0162	0.0276	0.5575	0.00210842	0.00691167
rs12320328	nonHDL	12	25408464	A	G	-0.0274	0.0027	23.4715	-0.004	0.012	0.73	-0.0087	0.007	0.2106	-0.0584	0.0435	0.1789	0.00840048	0.00967408
rs75667995	LDL	12	25409070	T	C	-0.0285	0.0027	25.3198	-0.0048	0.013	0.7	-0.0116	0.0086	0.1804	-0.0231	0.0467	0.6218	0.00944922	0.0102548
rs75667995	logTG	12	25409070	T	C	-0.0201	0.0027	13.0116	-0.0048	0.013	0.7	-0.0116	0.0086	0.1804	-0.0231	0.0467	0.6218	0.00888658	0.00990822
rs75667995	TC	12	25409070	T	C	-0.0331	0.0026	36.3991	-0.0048	0.013	0.7	-0.0116	0.0086	0.1804	-0.0231	0.0467	0.6218	0.00899255	0.00987272
rs7132434	logTG	12	26472562	A	G	-0.0147	0.0014	25.0636	-0.047	0.0073	1.6e-10	-0.001	0.0042	0.8178	-0.0491	0.0264	0.06269	0.00165653	0.968337
rs7969023	TC	12	26803949	C	T	-0.009	0.0012	13.1951	0.013	0.0064	0.047	0.0065	0.0039	0.09458	0.0016	0.0234	0.947	0.00624522	0.032712
rs966541	LDL	12	29491528	A	G	-0.0093	0.0014	10.5119	-0.0009	0.007	0.9	0.0055	0.004	0.1619	0.0164	0.0255	0.5197	0.00526057	0.00535188
rs966541	TC	12	29491528	A	G	-0.0141	0.0013	26.6819	-0.0009	0.007	0.9	0.0055	0.004	0.1619	0.0164	0.0255	0.5197	0.00402903	0.00536317
rs10843390	nonHDL	12	29496991	C	T	-0.0137	0.0016	16.9568	-0.001	0.007	0.89	0.0061	0.004	0.1262	0.016	0.0255	0.5305	0.00357171	0.00533008
rs10843391	logTG	12	29508642	A	G	-0.0122	0.0013	20.1997	-0.0006	0.0069	0.93	0.0046	0.004	0.244	0.0186	0.0253	0.4631	0.00285804	0.00528444
rs2638250	nonHDL	12	40565161	A	C	-0.018	0.0023	14.2982	-0.0033	0.012	0.78	0.0134	0.0057	0.01941	0.0349	0.041	0.3953	0.0225489	0.00865107
rs2638250	TC	12	40565161	A	C	-0.0164	0.0019	17.2182	-0.0033	0.012	0.78	0.0134	0.0057	0.01941	0.0349	0.041	0.3953	0.0175456	0.00909903
rs11175518	LDL	12	40580318	C	T	-0.0204	0.0023	18.1341	-0.0004	0.013	0.98	0.013	0.0064	0.04321	0.023	0.0459	0.6162	0.0151632	0.00898248
rs7298844	logTG	12	46224063	G	A	-0.0154	0.0016	21.2027	-0.031	0.0079	9.2e-05	0.0005	0.0052	0.9172	0.0263	0.029	0.3654	0.00191369	0.908617
rs10880868	TC	12	46322449	T	C	-0.0122	0.0016	13.6125	-0.033	0.0079	2.6e-05	0.0009	0.0049	0.851	0.0223	0.0287	0.4365	0.00161766	0.957475
rs145878042	logTG	12	48143315	G	A	-0.0443	0.0064	11.351	0.0044	0.031	0.89	0.0175	0.0204	0.3915	-0.0508	0.1094	0.6427	0.0108568	0.0224595
rs1126930	logTG	12	49399132	C	G	-0.0274	0.0037	12.8836	-0.023	0.018	0.19	-0.0246	0.0118	0.03786	-0.0576	0.0633	0.363	0.0380225	0.0289981
rs149806222	LDL	12	50127304	ATAATAT	A	-0.0296	0.0047	9.52034	na	na	na	0.0291	0.0142	0.0402	na	na	na	0.0382456	0.065076
rs149806222	nonHDL	12	50127304	ATAATAT	A	-0.0356	0.0053	10.7316	na	na	na	0.0291	0.0142	0.0402	na	na	na	0.0738779	0.0293921
rs149806222	TC	12	50127304	ATAATAT	A	-0.0365	0.0043	16.6787	na	na	na	0.0291	0.0142	0.0402	na	na	na	0.0678271	0.0217481
rs2251024	LDL	12	51103633	C	T	-0.0165	0.0014	31.3349	0.015	0.0066	0.029	-0.0112	0.0044	0.01111	0.0341	0.0241	0.1582	0.0349752	0.0331672
rs2251024	nonHDL	12	51103633	C	T	-0.0166	0.0017	21.797	0.015	0.0066	0.029	-0.0112	0.0044	0.01111	0.0341	0.0241	0.1582	0.0431239	0.0444703
rs2251024	TC	12	51103633	C	T	-0.0183	0.0014	38.3192	0.015	0.0066	0.029	-0.0112	0.0044	0.01111	0.0341	0.0241	0.1582	0.0417695	0.0368079
rs61177162	TC	12	51779544	AG	A	-0.016	0.0015	25.8364	na	na	na	0.0084	0.0048	0.07849	na	na	na	0.00608988	0.00696963
rs10876169	LDL	12	51783420	T	A	-0.0127	0.0013	21.8164	-0.0027	0.0066	0.68	-0.0094	0.004	0.01766	-0.011	0.027	0.6838	0.0291115	0.00510739
rs907348	nonHDL	12	51788340	T	C	-0.0113	0.0016	11.7864	-0.0051	0.0067	0.45	-0.0048	0.0039	0.2126	0.0002	0.0255	0.9932	0.010207	0.0151059
rs7316678	LDL	12	53265945	T	C	-0.0097	0.0013	13.0679	-0.0005	0.0062	0.94	-0.0041	0.0038	0.2744	-0.0345	0.0235	0.1421	0.00258389	0.0048084
rs11170385	TC	12	53443278	T	G	-0.0079	0.0013	8.91183	0.0051	0.0065	0.44	-0.0077	0.004	0.05609	0.0144	0.0241	0.5495	0.00279524	0.00659596
rs2608301	LDL	12	53793314	A	C	-0.0127	0.0016	14.6855	-0.0024	0.0084	0.77	-0.0087	0.0047	0.06464	-0.0475	0.0303	0.1165	0.0115409	0.0067934
rs10783578	logTG	12	53796754	A	G	-0.0094	0.0014	10.7236	na	na	na	-0.0017	0.0048	0.7218	na	na	na	0.00185559	0.00726009
rs80297745	nonHDL	12	53801461	A	C	-0.0142	0.0019	13.108	-0.0031	0.0085	0.71	-0.0075	0.0049	0.1228	-0.0494	0.0305	0.1055	0.00835933	0.00678864
rs7312441	logTG	12	56941146	C	A	-0.0098	0.0013	13.3228	-0.0094	0.0066	0.16	0.0011	0.004	0.7881	-0.0021	0.0245	0.9329	0.84153	0.0112099
rs9739473	TC	12	57313335	T	A	-0.0079	0.0012	10.3372	0.0042	0.0066	0.53	-0.0101	0.0038	0.008349	0.0121	0.024	0.6137	0.0665032	0.00479916
rs11172134	LDL	12	57645789	T	A	-0.0146	0.0016	19.1443	-0.0095	0.0079	0.23	-0.0249	0.005	6.116e-07	0.0087	0.0289	0.7645	0.9911	0.0115116
rs12313762	nonHDL	12	57692470	C	T	-0.0226	0.0018	35.4311	-0.009	0.0074	0.23	-0.0215	0.0047	5.415e-06	0.0002	0.0272	0.995	0.953417	0.011318
rs7964492	logTG	12	57823585	A	C	-0.0243	0.0015	58.2973	-0.0092	0.0074	0.22	-0.021	0.0047	7.53e-06	0.0004	0.0271	0.9894	0.91694	0.0100677
rs10877029	TC	12	58256010	C	T	-0.0086	0.0013	10.4311	0.013	0.0068	0.052	-0.0046	0.0041	0.2605	0.0379	0.0249	0.1279	0.00193658	0.0334404
rs113439801	logTG	12	62838230	C	T	-0.0127	0.0018	11.7647	-0.016	0.0087	0.058	-0.0071	0.0057	0.2115	0.0436	0.0306	0.1542	0.00441796	0.0445805
rs12229749	logTG	12	63503447	C	T	-0.0097	0.0013	13.0679	-0.01	0.0067	0.13	-0.006	0.0041	0.1376	-0.003	0.0244	0.9006	0.00430659	0.0159879
rs2947795	logTG	12	66206798	C	T	-0.0125	0.0017	12.7124	-0.087	0.01	2.8e-18	-0.0059	0.0049	0.2222	0.0079	0.0335	0.8133	0.00387372	0.0867856
rs343087	TC	12	66260924	A	G	-0.0108	0.0017	9.67523	-0.087	0.0092	1.5e-21	-0.0065	0.0049	0.1869	0.0011	0.0336	0.9749	0.00460667	0.32301
rs4761233	logTG	12	69722880	T	C	-0.0094	0.0013	12.3185	-0.017	0.0064	0.0083	-0.0053	0.0038	0.1611	0.0027	0.0235	0.9094	0.00292023	0.0798724
rs61754230	LDL	12	72179446	T	C	-0.0494	0.0056	17.9469	-0.011	0.026	0.68	-0.0163	0.0165	0.3241	-0.0188	0.0842	0.823	0.0108847	0.0181678
rs61754230	nonHDL	12	72179446	T	C	-0.058	0.0069	16.3716	-0.011	0.026	0.68	-0.0163	0.0165	0.3241	-0.0188	0.0842	0.823	0.0108971	0.01861
rs61754230	TC	12	72179446	T	C	-0.0478	0.0054	18.0651	-0.011	0.026	0.68	-0.0163	0.0165	0.3241	-0.0188	0.0842	0.823	0.0108833	0.0181277
rs111848146	nonHDL	12	89874816	C	CAGGGCCTAATTGTT	-0.0127	0.0019	10.6342	na	na	na	-0.0027	0.0061	0.6613	na	na	na	7.31615e-07	0.00466369
rs876554	TC	12	89885473	C	T	-0.0081	0.0012	10.8302	0.0054	0.0063	0.39	0.0096	0.0037	0.00947	-0.0344	0.0232	0.1376	1.13601e-07	0.00546707
rs12306780	LDL	12	89921860	T	A	-0.0101	0.0014	12.2659	0.0028	0.0067	0.68	0.0094	0.0041	0.02107	-0.0134	0.0243	0.5798	3.86291e-10	0.00526899
rs4760388	LDL	12	92802078	C	T	-0.0093	0.0013	12.0738	-0.0098	0.0063	0.12	0.001	0.0038	0.7825	0.0087	0.0232	0.7074	0.00153981	0.0193549
rs1515563	TC	12	92819139	C	A	-0.0084	0.0012	11.5918	-0.0096	0.0064	0.14	0.0001	0.0038	0.9823	0.0057	0.0241	0.8119	0.00152159	0.0146107
rs1536464	LDL	12	100836797	T	C	-0.0117	0.0013	18.6464	-0.0052	0.0064	0.42	-0.0067	0.0038	0.07718	0.0005	0.024	0.9841	0.00687253	0.0063728
rs1536464	nonHDL	12	100836797	T	C	-0.0122	0.0015	15.3792	-0.0052	0.0064	0.42	-0.0067	0.0038	0.07718	0.0005	0.024	0.9841	0.00695661	0.00658243
rs1536464	TC	12	100836797	T	C	-0.0119	0.0012	22.4531	-0.0052	0.0064	0.42	-0.0067	0.0038	0.07718	0.0005	0.024	0.9841	0.00659682	0.0063314
rs4764883	LDL	12	102806305	C	T	-0.0108	0.0014	13.9148	0.02	0.007	0.0041	0.0014	0.004	0.7329	-0.0348	0.0256	0.1738	0.00161129	0.323444
rs4764883	TC	12	102806305	C	T	-0.0087	0.0013	10.6582	0.02	0.007	0.0041	0.0014	0.004	0.7329	-0.0348	0.0256	0.1738	0.00171655	0.256504
rs1196760	LDL	12	105606068	G	C	-0.0192	0.0024	14.9051	-0.015	0.011	0.18	-0.0035	0.0076	0.6473	0.0503	0.0416	0.2267	0.00311894	0.0198657
rs1196760	nonHDL	12	105606068	G	C	-0.0206	0.0028	12.7261	-0.015	0.011	0.18	-0.0035	0.0076	0.6473	0.0503	0.0416	0.2267	0.00311199	0.0199207
rs1196760	TC	12	105606068	G	C	-0.0185	0.0023	15.0589	-0.015	0.011	0.18	-0.0035	0.0076	0.6473	0.0503	0.0416	0.2267	0.00311784	0.0198689
rs11113118	logTG	12	107199142	A	G	-0.0163	0.0014	30.6029	-0.022	0.0074	0.0034	0.0011	0.0042	0.7904	0.0131	0.0268	0.6259	0.00161206	0.307124
rs4964736	logTG	12	109100503	T	C	-0.0091	0.0013	11.5918	-0.017	0.0066	0.0088	-0.0169	0.004	2.497e-05	0.0015	0.0243	0.9506	0.0435467	0.137099
rs4964275	TC	12	109152649	T	C	-0.011	0.0013	16.5786	-0.014	0.0069	0.042	-0.0169	0.004	3.008e-05	-0.006	0.0251	0.8118	0.769204	0.0376454
rs4964750	nonHDL	12	109156737	C	T	-0.0151	0.0016	20.4182	-0.013	0.0069	0.054	-0.0162	0.004	6.55e-05	-0.0048	0.025	0.8475	0.912557	0.0363955
rs4964756	LDL	12	109171697	A	T	-0.013	0.0014	19.7942	-0.014	0.0068	0.047	-0.0165	0.004	4.504e-05	-0.0041	0.0249	0.87	0.773869	0.0542842
rs12316300	logTG	12	109709680	G	T	-0.0174	0.0016	26.8191	0.0026	0.0083	0.75	-0.0114	0.0046	0.01308	-0.0153	0.0295	0.6035	3.31849e-07	0.00652012
rs10850141	nonHDL	12	109876128	T	C	-0.0111	0.0016	11.3989	-0.0013	0.0069	0.85	-0.0109	0.004	0.005882	0	0.0247	0.9992	0.00460102	0.00523054
rs7953014	TC	12	109998097	G	A	-0.0182	0.0012	51.2307	-0.002	0.0062	0.75	-0.009	0.0037	0.01606	0.0116	0.023	0.6155	8.87918e-12	0.0049924
rs7134594	LDL	12	110000193	T	C	-0.0076	0.0013	8.29837	-0.0019	0.0062	0.76	-0.009	0.0037	0.01611	0.0115	0.023	0.6165	0.000543246	0.0062098
rs2339718	logTG	12	111702646	A	G	-0.0109	0.0014	14.1591	-0.0096	0.0072	0.19	na	na	na	-0.0213	0.0267	0.4258	4.40782e-09	0.222894
rs653178	LDL	12	112007756	T	C	-0.0236	0.0013	72.9218	0.021	0.0064	0.0015	na	na	na	0.0207	0.0228	0.3642	1.14293e-14	0.416391
rs653178	nonHDL	12	112007756	T	C	-0.0202	0.0016	35.8132	0.021	0.0064	0.0015	na	na	na	0.0207	0.0228	0.3642	1.1326e-10	0.4058
rs653178	TC	12	112007756	T	C	-0.0269	0.0013	94.3912	0.021	0.0064	0.0015	na	na	na	0.0207	0.0228	0.3642	3.48767e-14	0.407262
rs11066412	LDL	12	113218868	G	A	-0.0145	0.0016	18.8945	-0.0009	0.0072	0.9	0.0188	0.0049	0.0001233	0.0379	0.0261	0.1464	0.923268	0.00545167
rs11066412	TC	12	113218868	G	A	-0.014	0.0015	19.9889	-0.0009	0.0072	0.9	0.0188	0.0049	0.0001233	0.0379	0.0261	0.1464	0.926475	0.00545302
rs2516079	TC	12	120859188	G	T	-0.0105	0.0013	15.1777	-0.0058	0.0071	0.42	0.0075	0.0041	0.06562	-0.0209	0.026	0.4204	0.00829109	0.00288999
rs1169288	LDL	12	121416650	C	A	-0.0344	0.0014	132.593	-0.049	0.0068	7.3e-13	-0.0329	0.004	2.313e-16	-0.0496	0.0245	0.04257	0.999838	8.97663e-06
rs1169288	TC	12	121416650	C	A	-0.0346	0.0013	155.346	-0.049	0.0068	7.3e-13	-0.0329	0.004	2.313e-16	-0.0496	0.0245	0.04257	0.987308	0.00022985
rs2244608	nonHDL	12	121416988	G	A	-0.0304	0.0016	79.7682	-0.046	0.0068	2e-11	-0.0339	0.004	1.872e-17	-0.0419	0.0245	0.08722	0.953484	2.38352e-07
rs1667583	TC	12	122370206	T	C	-0.0114	0.0018	9.61993	0.0047	0.0095	0.62	-0.0035	0.0056	0.5267	-0.0123	0.0342	0.7183	0.0027849	0.00790109
rs2247139	LDL	12	122380274	A	G	-0.012	0.0018	10.5822	0.0046	0.0095	0.63	-0.0041	0.0055	0.4576	-0.014	0.0343	0.683	0.00655064	0.00791083
rs488635	logTG	12	123203258	T	G	-0.0145	0.0015	21.3791	-0.014	0.0077	0.067	-0.0035	0.0043	0.4153	0.0191	0.028	0.4953	0.00230799	0.00014563
rs7312145	nonHDL	12	123825339	A	G	-0.0171	0.0023	12.9799	-0.015	0.011	0.15	0.0179	0.0057	0.001595	0.0385	0.0395	0.3299	0.197304	3.68581e-06
rs7312145	TC	12	123825339	A	G	-0.0308	0.0019	58.3717	-0.015	0.011	0.15	0.0179	0.0057	0.001595	0.0385	0.0395	0.3299	0.199592	5.54609e-06
rs28461471	LDL	12	123856974	G	A	-0.021	0.0021	22.817	na	na	na	0.0206	0.0063	0.001158	na	na	na	0.286515	1.01896e-05
rs28577594	logTG	12	123895906	C	G	-0.0089	0.0014	9.6871	-0.033	0.0071	3.4e-06	-0.0027	0.0042	0.5244	-0.016	0.0259	0.5355	0.0026857	0.943742
rs7133378	nonHDL	12	124409502	G	A	-0.0167	0.0016	24.7769	-0.034	0.0068	8.5e-07	-0.0199	0.0041	9.818e-07	-0.0128	0.0244	0.6011	0.71167	0.932255
rs12303671	logTG	12	124492610	T	G	-0.0227	0.0013	67.5509	-0.032	0.0067	1.5e-06	-0.0188	0.0041	3.829e-06	-0.0061	0.0245	0.8016	0.86655	0.926124
rs1716393	LDL	12	124560456	T	G	-0.0087	0.0013	10.6582	-0.028	0.0064	2e-05	-0.0129	0.0038	0.000715	-0.0116	0.0234	0.6222	0.924197	0.968836
rs921919	TC	12	125265201	G	A	-0.0187	0.0013	46.1895	0.0076	0.0069	0.27	0.0124	0.0042	0.002948	-0.0316	0.0248	0.2028	3.62639e-07	0.00869519
rs10846744	LDL	12	125312425	C	G	-0.0203	0.0017	32.1415	-0.007	0.0091	0.44	-0.0508	0.0047	2.098e-27	-0.0188	0.0325	0.5634	0.999578	0.00826322
rs10846744	logTG	12	125312425	C	G	-0.0186	0.0017	27.1352	-0.007	0.0091	0.44	-0.0508	0.0047	2.098e-27	-0.0188	0.0325	0.5634	0.999793	0.00838242
rs10846744	nonHDL	12	125312425	C	G	-0.0279	0.002	43.5022	-0.007	0.0091	0.44	-0.0508	0.0047	2.098e-27	-0.0188	0.0325	0.5634	0.99736	0.00771137
rs73486469	LDL	12	133065832	G	A	-0.0158	0.002	14.5545	0.0039	0.0093	0.67	-0.0195	0.006	0.001153	-0.0259	0.0325	0.4246	0.257162	6.02123e-06
rs73486469	TC	12	133065832	G	A	-0.0183	0.0019	21.2305	0.0039	0.0093	0.67	-0.0195	0.006	0.001153	-0.0259	0.0325	0.4246	0.202753	9.76094e-08
rs78644250	nonHDL	12	133140329	G	C	-0.0204	0.0025	15.4749	na	na	na	-0.0069	0.0075	0.3532	na	na	na	0.00517242	0.00163078
rs2737700	logTG	13	23908034	A	G	-0.0109	0.0013	16.2934	-0.02	0.0064	0.0018	-0.0014	0.0037	0.7052	-0.0634	0.0231	0.00606	0.00153939	0.392557
rs76428106	TC	13	28604007	T	C	-0.0531	0.0065	15.5081	0.055	0.029	0.059	0.0295	0.024	0.2187	0.0068	0.117	0.954	0.0150439	0.058421
rs1340819	logTG	13	29145323	A	C	-0.0094	0.0013	12.3185	-0.017	0.0067	0.011	-0.0097	0.004	0.01548	-0.0025	0.0248	0.9189	0.00273112	0.102672
rs398098735	logTG	13	31001091	AT	A	-0.0111	0.0014	14.6543	na	na	na	0.0066	0.0045	0.1394	na	na	na	0.00408764	0.939908
rs4769036	TC	13	31005142	C	T	-0.0087	0.0012	12.3801	-0.022	0.0065	0.00073	-0.0053	0.0038	0.1653	-0.0014	0.0244	0.9527	0.0041045	0.506032
rs5026917	nonHDL	13	31010795	A	C	-0.013	0.0015	17.3517	-0.023	0.0066	0.00045	-0.004	0.0039	0.3111	-0.0011	0.0247	0.9651	0.00260804	0.0537969
rs12868611	TC	13	32444439	T	C	-0.0097	0.0013	13.0679	-0.02	0.0068	0.0032	-0.0055	0.0039	0.1547	-0.0227	0.0248	0.3606	0.00349835	0.250624
rs7997102	LDL	13	32445660	T	C	-0.0096	0.0013	12.8156	-0.02	0.0068	0.0032	-0.0054	0.0039	0.1619	-0.0227	0.0248	0.3604	0.00346612	0.292126
rs368213791	LDL	13	32976656	GC	G	-0.0244	0.0014	67.3003	na	na	na	0.0142	0.0049	0.003803	na	na	na	0.620259	0.00514106
rs368213791	nonHDL	13	32976656	GC	G	-0.026	0.0016	58.651	na	na	na	0.0142	0.0049	0.003803	na	na	na	0.548048	0.00534571
rs368213791	TC	13	32976656	GC	G	-0.0208	0.0013	56.8936	na	na	na	0.0142	0.0049	0.003803	na	na	na	0.367036	0.00513472
rs17532371	LDL	13	41635301	C	G	-0.0199	0.0026	13.7098	0.037	0.012	0.003	-0.0079	0.0081	0.3239	-0.0272	0.0471	0.5638	0.00528175	0.0570769
rs17532371	TC	13	41635301	C	G	-0.0276	0.0025	27.6108	0.037	0.012	0.003	-0.0079	0.0081	0.3239	-0.0272	0.0471	0.5638	0.00518667	0.0535324
rs138358301	logTG	13	45970147	G	A	-0.0686	0.0102	10.757	-0.11	0.05	0.026	0.0021	0.0294	0.9417	-0.1459	0.1537	0.3425	0.0119025	0.19008
rs11386165	TC	13	50048401	CA	C	-0.013	0.002	10.0952	na	na	na	na	na	na	na	na	na	0.53736	0.00765903
rs9535255	LDL	13	50104386	A	G	-0.0083	0.0013	9.7649	0.0045	0.0064	0.48	-0.0159	0.0037	1.404e-05	-0.0029	0.023	0.9011	0.892862	0.0119541
rs41284816	logTG	13	50655989	G	T	-0.0502	0.0048	24.8723	-0.034	0.023	0.15	0.0108	0.0157	0.4888	-0.1849	0.0859	0.0313	0.00652838	0.0378634
rs41284816	nonHDL	13	50655989	G	T	-0.0431	0.0057	13.3993	-0.034	0.023	0.15	0.0108	0.0157	0.4888	-0.1849	0.0859	0.0313	0.00633425	0.039643
rs1239707	TC	13	51151633	A	G	-0.0089	0.0012	12.9204	0.025	0.0063	6.6e-05	0.0048	0.0038	0.2053	0.0165	0.0233	0.4789	0.00322919	0.196653
rs558003	logTG	13	51172963	G	A	-0.0165	0.0021	14.4056	-0.04	0.011	0.00023	-0.0068	0.0063	0.2828	-0.053	0.039	0.1743	0.00510782	0.0558226
rs4885160	LDL	13	74748606	A	G	-0.0097	0.0013	13.0679	-0.0045	0.0064	0.48	-0.0042	0.004	0.3024	0.0105	0.0238	0.6601	0.00267973	0.00590669
rs4885160	nonHDL	13	74748606	A	G	-0.0109	0.0015	12.4336	-0.0045	0.0064	0.48	-0.0042	0.004	0.3024	0.0105	0.0238	0.6601	0.00256217	0.00628711
rs4885160	TC	13	74748606	A	G	-0.0119	0.0013	19.2601	-0.0045	0.0064	0.48	-0.0042	0.004	0.3024	0.0105	0.0238	0.6601	0.00259295	0.00615473
rs7322453	LDL	13	95226210	C	G	-0.0134	0.0015	18.3837	-0.0068	0.0073	0.35	0.002	0.0045	0.6481	-0.0339	0.026	0.1932	0.00175114	0.00610239
rs6492721	logTG	13	95258944	T	C	-0.018	0.0013	42.8722	0.019	0.0068	0.0058	-0.0035	0.004	0.3766	0.0132	0.0249	0.5961	0.00223279	0.182342
rs754205	TC	13	110411642	C	A	-0.0079	0.0012	10.3372	0.027	0.0065	3.7e-05	0.0012	0.0038	0.7596	-0.0083	0.0238	0.7279	0.00349542	0.45466
rs9521732	nonHDL	13	111033821	C	A	-0.0161	0.0015	26.1488	-0.016	0.0065	0.015	0.0153	0.0037	3.957e-05	-0.0167	0.0236	0.4793	3.79905e-12	0.0726495
rs9521732	TC	13	111033821	C	A	-0.0142	0.0012	31.5809	-0.016	0.0065	0.015	0.0153	0.0037	3.957e-05	-0.0167	0.0236	0.4793	1.78026e-17	0.0791125
rs75345389	logTG	13	111038379	T	C	-0.0101	0.0015	10.7804	-0.0086	0.0077	0.27	0.0331	0.0058	1.034e-08	-0.0328	0.0267	0.2196	7.79441e-07	0.0149268
rs4771674	LDL	13	111039070	G	A	-0.0151	0.0013	30.4631	-0.013	0.0065	0.044	0.0176	0.0038	4.646e-06	-0.0157	0.024	0.512	3.35643e-16	0.0375965
rs9604045	TC	13	113927208	T	G	-0.0138	0.0016	17.1932	-0.0058	0.0081	0.47	-0.005	0.0052	0.3374	-0.0013	0.0312	0.9656	0.00277764	0.00690953
rs6602909	LDL	13	114551993	C	T	-0.0216	0.0014	52.9781	0.0047	0.0069	0.5	-0.0115	0.004	0.004269	0.0001	0.0247	0.9954	0.0805874	0.00613191
rs6602909	logTG	13	114551993	C	T	-0.0256	0.0013	85.6003	0.0047	0.0069	0.5	-0.0115	0.004	0.004269	0.0001	0.0247	0.9954	0.0803356	0.00613058
rs6602909	nonHDL	13	114551993	C	T	-0.0296	0.0016	75.6851	0.0047	0.0069	0.5	-0.0115	0.004	0.004269	0.0001	0.0247	0.9954	0.0803384	0.00613111
rs6602909	TC	13	114551993	C	T	-0.0264	0.0013	90.9588	0.0047	0.0069	0.5	-0.0115	0.004	0.004269	0.0001	0.0247	0.9954	0.0803356	0.00613058
rs1998848	LDL	14	21492229	G	A	-0.0375	0.0053	11.827	0.027	0.03	0.37	-0.0052	0.0127	0.6861	0.0791	0.1201	0.5102	0.00253979	0.0142062
rs1998848	TC	14	21492229	G	A	-0.0364	0.0046	14.6	0.027	0.03	0.37	-0.0052	0.0127	0.6861	0.0791	0.1201	0.5102	0.0025388	0.0142036
rs34210072	logTG	14	23685442	G	A	-0.0107	0.0017	9.50983	-0.0082	0.0085	0.33	-0.0033	0.005	0.519	-0.0271	0.0311	0.3844	0.00253373	0.00778101
rs79873985	logTG	14	24560159	A	G	-0.0371	0.0058	9.79881	-0.034	0.027	0.21	0.0239	0.0234	0.3062	-0.0805	0.096	0.4015	0.00915088	0.0281093
rs11621792	LDL	14	24871926	T	C	-0.0224	0.0013	65.8067	-0.014	0.0065	0.029	-0.0006	0.0041	0.893	-0.0391	0.0239	0.1018	0.00149619	0.0479875
rs11621792	TC	14	24871926	T	C	-0.0213	0.0013	59.6085	-0.014	0.0065	0.029	-0.0006	0.0041	0.893	-0.0391	0.0239	0.1018	0.00149617	0.0479875
rs6573778	nonHDL	14	24872209	T	C	-0.0228	0.0016	45.3484	-0.012	0.0065	0.058	0.0017	0.004	0.6767	-0.0424	0.0237	0.07368	0.00152653	0.0419961
rs139262716	nonHDL	14	31725111	G	A	-0.0369	0.0041	18.6464	0.023	0.024	0.33	-0.0374	0.0093	5.455e-05	-0.0669	0.0806	0.4061	0.853419	0.0258038
rs138804630	TC	14	31727404	G	GT	-0.0314	0.0035	18.5336	na	na	na	na	na	na	na	na	na	0.902547	0.0259323
rs11845699	LDL	14	31735087	G	T	-0.0196	0.0029	10.856	0.025	0.022	0.26	-0.023	0.0073	0.001558	-0.0303	0.0747	0.6854	0.883519	0.0272984
rs11846704	LDL	14	35186694	C	T	-0.0112	0.0014	14.9051	0.012	0.0072	0.11	-0.0091	0.0042	0.02937	0.0154	0.0261	0.5551	0.0152518	0.0182002
rs11846704	nonHDL	14	35186694	C	T	-0.0117	0.0017	11.2301	0.012	0.0072	0.11	-0.0091	0.0042	0.02937	0.0154	0.0261	0.5551	0.0149529	0.0175311
rs11846704	TC	14	35186694	C	T	-0.0094	0.0013	12.3185	0.012	0.0072	0.11	-0.0091	0.0042	0.02937	0.0154	0.0261	0.5551	0.0145503	0.0173911
rs1168548	logTG	14	38848824	T	A	-0.0068	0.0014	5.92412	-0.036	0.0072	5.5e-07	-0.0073	0.0042	0.08524	-0.051	0.0265	0.05412	0.00338519	0.91377
rs62000665	TC	14	39766074	T	C	-0.0117	0.0015	14.2083	-0.02	0.008	0.013	-0.0075	0.0047	0.1108	-0.0104	0.0288	0.7169	0.00663738	0.0755782
rs72681869	logTG	14	50655357	G	C	-0.053	0.0076	11.5104	-0.13	0.036	0.00039	-0.0726	0.025	0.003709	-0.1359	0.1282	0.289	0.531101	0.879965
rs1151574	logTG	14	52470889	G	A	-0.011	0.0018	9.00463	-0.021	0.0093	0.022	-0.0055	0.0058	0.3433	0.0032	0.0339	0.925	0.00795501	0.0218223
rs7154773	logTG	14	60749118	C	G	-0.0092	0.0013	11.8315	-0.0026	0.0066	0.7	0.0006	0.0041	0.8792	-0.0301	0.0241	0.2116	0.00169496	0.0044964
rs8012828	LDL	14	64233980	T	C	-0.0154	0.0017	18.8799	-0.022	0.0088	0.01	-0.0007	0.0052	0.8888	-0.0137	0.0311	0.6594	0.00194524	0.158071
rs35372182	TC	14	64236157	G	A	-0.0166	0.0016	24.4919	-0.023	0.0088	0.0081	-0.0008	0.005	0.8766	-0.0125	0.031	0.686	0.0018421	0.177224
rs12897637	nonHDL	14	64239351	C	T	-0.0179	0.0021	16.8114	-0.023	0.0088	0.0086	-0.0012	0.0051	0.8106	-0.0114	0.0311	0.7145	0.00185649	0.164925
rs12878001	logTG	14	64239629	G	T	-0.018	0.0017	25.4712	-0.023	0.0088	0.0086	-0.0009	0.005	0.8542	-0.0122	0.031	0.6934	0.0018256	0.171959
rs4899263	logTG	14	69285264	A	G	-0.0088	0.0013	10.8878	0.001	0.0064	0.88	0.0161	0.0038	2.083e-05	-0.0156	0.0232	0.5025	0.906687	0.00467903
rs7157399	nonHDL	14	70846954	C	T	-0.0217	0.0022	22.223	0.022	0.0092	0.016	-0.0176	0.0054	0.001074	0.0114	0.0331	0.7303	0.190888	0.105244
rs8022128	TC	14	70847103	G	A	-0.0179	0.0018	22.574	0.022	0.0092	0.014	-0.0176	0.0054	0.001169	0.0095	0.0333	0.7763	0.195227	0.10489
rs6573960	LDL	14	70857022	T	C	-0.0246	0.0019	37.6141	0.022	0.0093	0.017	-0.0174	0.0054	0.001412	0.0105	0.0331	0.7512	0.185445	0.104375
rs13379043	LDL	14	74250126	T	C	-0.0162	0.0014	30.2402	0.0041	0.0072	0.57	-0.0102	0.0041	0.01334	-0.0109	0.0255	0.6683	0.0290203	0.00588032
rs13379043	nonHDL	14	74250126	T	C	-0.0172	0.0017	23.3359	0.0041	0.0072	0.57	-0.0102	0.0041	0.01334	-0.0109	0.0255	0.6683	0.0270208	0.00587099
rs13379043	TC	14	74250126	T	C	-0.0096	0.0014	11.1533	0.0041	0.0072	0.57	-0.0102	0.0041	0.01334	-0.0109	0.0255	0.6683	0.0282441	0.00587673
rs11159104	TC	14	75293374	A	G	-0.0115	0.0012	21.027	0.0081	0.0063	0.2	0.0092	0.0038	0.01565	-0.0143	0.0231	0.5372	0.0280735	0.010871
rs2359239	nonHDL	14	75326771	T	C	-0.012	0.0015	14.9051	-0.0005	0.0065	0.94	0.0081	0.0038	0.03186	-0.0021	0.0235	0.9283	0.0147736	0.0048325
rs722599	LDL	14	75327443	C	T	-0.0091	0.0013	11.5918	-0.0005	0.0065	0.94	0.0085	0.0038	0.02535	-0.002	0.0235	0.9305	0.02342	0.0112612
rs4904550	logTG	14	89804856	G	A	-0.0109	0.0016	11.0181	-0.021	0.0081	0.0098	-0.0066	0.0047	0.1591	-0.0167	0.0293	0.5689	0.00392085	0.124124
rs11626777	nonHDL	14	90048934	T	C	-0.01	0.0016	9.38674	-0.022	0.0066	0.00098	-0.0142	0.0042	0.0006698	0.0372	0.0244	0.1276	0.160462	0.323521
rs34513589	LDL	14	90058243	G	A	-0.0088	0.0013	10.8878	-0.018	0.0065	0.0049	-0.0113	0.0041	0.006253	0.0269	0.0241	0.2631	0.0429548	0.137521
rs34513589	TC	14	90058243	G	A	-0.0085	0.0013	10.2065	-0.018	0.0065	0.0049	-0.0113	0.0041	0.006253	0.0269	0.0241	0.2631	0.0871927	0.210652
rs17580	LDL	14	94847262	A	T	-0.0495	0.0035	44.6846	-0.0061	0.017	0.71	0.0108	0.0103	0.2948	-0.048	0.0607	0.4293	1.60986e-12	0.00779852
rs17580	nonHDL	14	94847262	A	T	-0.044	0.0043	23.8486	-0.0061	0.017	0.71	0.0108	0.0103	0.2948	-0.048	0.0607	0.4293	1.03145e-09	0.0077993
rs17580	TC	14	94847262	A	T	-0.0475	0.0034	43.6277	-0.0061	0.017	0.71	0.0108	0.0103	0.2948	-0.048	0.0607	0.4293	1.60986e-12	0.00779852
rs61993685	logTG	14	100765823	T	C	-0.0196	0.0026	13.3228	-0.022	0.012	0.077	-0.0175	0.0084	0.03692	-0.0358	0.0465	0.4417	0.0262722	0.0383314
rs1211836	LDL	14	102622225	T	C	-0.0106	0.0015	11.7994	0.028	0.0077	0.00029	0.0081	0.0046	0.08083	0.002	0.0285	0.9451	0.00868023	0.739762
rs6575900	TC	14	102675350	G	C	-0.0124	0.0015	15.8609	0.027	0.0077	0.00049	0.0086	0.0047	0.06578	0.0014	0.0286	0.9621	0.00803809	0.595157
rs12891399	logTG	14	104293533	C	T	-0.0108	0.0013	16.0106	-0.019	0.0067	0.0053	-0.0109	0.004	0.006309	-0.0086	0.0245	0.7241	0.0589396	0.1539
rs28624578	logTG	15	31637666	C	T	-0.012	0.0018	10.5822	-0.013	0.0086	0.14	-0.0089	0.0056	0.1138	-0.0057	0.0316	0.8565	0.00703845	0.0156689
rs275179	logTG	15	39447529	A	G	-0.0131	0.0016	15.574	-0.013	0.0089	0.13	0.0003	0.0047	0.9493	-0.0163	0.0321	0.6112	0.00155943	0.0200684
rs35477346	logTG	15	40400195	C	T	-0.0115	0.0014	15.6707	-0.03	0.007	1.5e-05	-0.0106	0.0041	0.009712	-0.0017	0.0258	0.949	0.00786667	0.992588
rs2289334	TC	15	40616986	T	C	-0.0122	0.0019	9.86859	-0.033	0.013	0.0092	-0.0029	0.0056	0.6072	-0.0091	0.042	0.8282	0.00180248	0.464222
rs72735627	logTG	15	41057507	C	T	-0.0207	0.0025	15.9095	-0.035	0.011	0.002	-0.0342	0.0086	7.248e-05	-0.0324	0.0413	0.4329	0.887873	0.469522
rs8025212	logTG	15	41880619	A	G	-0.011	0.0014	14.4056	-0.036	0.0068	1.8e-07	-0.0011	0.0044	0.8053	-0.0398	0.0249	0.11	0.00147574	0.000392075
rs139974673	logTG	15	44027885	C	T	-0.1328	0.0042	218.694	0.049	0.02	0.013	-0.0161	0.0129	0.2111	-0.0951	0.0689	0.1678	0.0114257	0.143124
rs139974673	nonHDL	15	44027885	C	T	-0.0404	0.0051	14.6298	0.049	0.02	0.013	-0.0161	0.0129	0.2111	-0.0951	0.0689	0.1678	0.0114524	0.145974
rs1901529	logTG	15	45001900	G	A	-0.0171	0.0021	15.4133	0.015	0.01	0.14	-0.0099	0.0068	0.146	-0.011	0.0403	0.7852	0.0128508	0.0147752
rs2413926	LDL	15	49336477	T	A	-0.0132	0.0013	23.4968	0.0074	0.0065	0.26	-0.0096	0.0041	0.01932	-0.0299	0.0241	0.2146	0.0233595	0.00556504
rs2413926	TC	15	49336477	T	A	-0.0117	0.0013	18.6464	0.0074	0.0065	0.26	-0.0096	0.0041	0.01932	-0.0299	0.0241	0.2146	0.0239984	0.0151756
rs55979115	nonHDL	15	49527624	T	C	-0.0153	0.0016	20.9395	0.014	0.0066	0.033	-0.0118	0.0044	0.007313	-0.0257	0.0242	0.2892	0.0442914	0.0313721
rs6493583	LDL	15	53096084	C	G	-0.0142	0.0018	14.5159	0.021	0.0095	0.023	-0.01	0.0052	0.05508	-0.0067	0.0338	0.8433	0.0123929	0.000178583
rs6493583	nonHDL	15	53096084	C	G	-0.015	0.0021	12.039	0.021	0.0095	0.023	-0.01	0.0052	0.05508	-0.0067	0.0338	0.8433	0.0123723	0.000189746
rs6493583	TC	15	53096084	C	G	-0.0133	0.0017	14.2894	0.021	0.0095	0.023	-0.01	0.0052	0.05508	-0.0067	0.0338	0.8433	0.0119863	0.000166613
rs79391862	LDL	15	53739426	A	C	-0.0649	0.0053	33.7494	-0.0074	0.023	0.75	-0.0163	0.0201	0.4176	-0.1402	0.1084	0.196	0.00974215	0.000218091
rs79391862	nonHDL	15	53739426	A	C	-0.0582	0.0058	22.9685	-0.0074	0.023	0.75	-0.0163	0.0201	0.4176	-0.1402	0.1084	0.196	0.00982668	0.000224736
rs79391862	TC	15	53739426	A	C	-0.06	0.0051	31.2267	-0.0074	0.023	0.75	-0.0163	0.0201	0.4176	-0.1402	0.1084	0.196	0.00975057	0.000218737
rs72749502	LDL	15	57297078	T	A	-0.0289	0.0027	26.0097	0.018	0.013	0.15	-0.0105	0.0083	0.2083	-0.0658	0.0472	0.1638	0.00655277	2.5317e-05
rs72749502	logTG	15	57297078	T	A	-0.029	0.0026	28.1638	0.018	0.013	0.15	-0.0105	0.0083	0.2083	-0.0658	0.0472	0.1638	0.00657025	2.51865e-05
rs72749502	nonHDL	15	57297078	T	A	-0.0382	0.003	36.4134	0.018	0.013	0.15	-0.0105	0.0083	0.2083	-0.0658	0.0472	0.1638	0.00657034	2.51889e-05
rs72749502	TC	15	57297078	T	A	-0.0319	0.0025	36.5619	0.018	0.013	0.15	-0.0105	0.0083	0.2083	-0.0658	0.0472	0.1638	0.0065538	2.53964e-05
rs35980001	LDL	15	58722590	GC	G	-0.0134	0.0016	16.2579	na	na	na	na	na	na	na	na	na	0.944827	0.178321
rs1077835	logTG	15	58723426	G	A	-0.0451	0.0014	226.953	0.0043	0.0077	0.58	-0.0208	0.0042	6.902e-07	-0.0113	0.0276	0.6823	0.973641	0.00578468
rs1077835	nonHDL	15	58723426	G	A	-0.0248	0.0017	47.4766	0.0043	0.0077	0.58	-0.0208	0.0042	6.902e-07	-0.0113	0.0276	0.6823	0.970138	0.00581529
rs2070895	TC	15	58723939	A	G	-0.0617	0.0014	423.506	0.0045	0.0077	0.56	-0.0203	0.0042	1.143e-06	-0.0071	0.0283	0.8017	0.984783	0.00556752
rs112147665	logTG	15	59277019	C	T	-0.1836	0.018	23.7027	0.044	0.097	0.65	na	na	na	0.4551	0.3674	0.2154	0.00302704	0.0340564
rs112147665	TC	15	59277019	C	T	-0.1596	0.0176	18.9171	0.044	0.097	0.65	na	na	na	0.4551	0.3674	0.2154	0.000971795	0.0340563
rs2245899	logTG	15	61952501	A	G	-0.01	0.0012	16.1046	-0.018	0.0064	0.0063	-0.0056	0.0038	0.1393	-0.0195	0.0232	0.4008	0.00443771	0.187834
rs11636087	LDL	15	63788267	C	T	-0.0138	0.0015	19.4462	0.0013	0.007	0.85	-0.0074	0.0046	0.1099	0.0181	0.0257	0.4808	0.00237757	1.81237e-06
rs62011285	nonHDL	15	63791063	C	T	-0.0171	0.0017	23.0757	0.0017	0.0066	0.8	-0.0003	0.0044	0.9479	0.0171	0.0242	0.4788	0.00157969	1.66031e-06
rs62011285	TC	15	63791063	C	T	-0.0165	0.0013	36.1855	0.0017	0.0066	0.8	-0.0003	0.0044	0.9479	0.0171	0.0242	0.4788	0.00154171	1.65645e-06
rs11635675	logTG	15	63793238	G	T	-0.0235	0.0014	62.508	0.0018	0.0066	0.79	-0.0001	0.0043	0.9824	0.0171	0.0242	0.48	0.00152509	1.60676e-06
rs4776793	logTG	15	66872114	T	C	-0.0131	0.0013	23.1556	-0.019	0.0066	0.0037	-0.0101	0.0039	0.0089	-0.0425	0.0241	0.07816	0.0120484	0.248087
rs4147358	LDL	15	67428014	A	C	-0.009	0.0015	8.70483	-0.0003	0.0077	0.97	-0.0099	0.0042	0.01717	-0.0276	0.0277	0.3187	3.28133e-06	0.00141893
rs4147358	nonHDL	15	67428014	A	C	-0.012	0.0017	11.7749	-0.0003	0.0077	0.97	-0.0099	0.0042	0.01717	-0.0276	0.0277	0.3187	4.03183e-09	0.00134692
rs4147358	TC	15	67428014	A	C	-0.0097	0.0014	11.3715	-0.0003	0.0077	0.97	-0.0099	0.0042	0.01717	-0.0276	0.0277	0.3187	6.33034e-09	0.00136033
rs12591142	logTG	15	70189590	A	C	-0.0222	0.0043	6.61387	-0.18	0.058	0.0017	-0.0224	0.0116	0.0533	-0.4408	0.2936	0.1333	0.0111018	0.598569
rs713048	logTG	15	72543084	G	A	-0.0123	0.0015	15.6191	-0.0088	0.0075	0.24	-0.0084	0.0044	0.05674	-0.036	0.0271	0.185	0.00986998	0.00999739
rs3850986	logTG	15	73091283	T	G	-0.0101	0.0013	14.1026	-0.021	0.0068	0.0018	-0.0171	0.004	1.602e-05	-0.0219	0.0246	0.3732	0.842394	0.373912
rs12917376	LDL	15	75116167	T	C	-0.0116	0.0013	18.3434	0.0024	0.0065	0.71	0.0073	0.004	0.06889	0.0152	0.0234	0.5147	0.0178124	0.00462169
rs6495122	nonHDL	15	75125645	C	A	-0.0102	0.0016	9.73764	-0.0003	0.0064	0.96	0.0024	0.0039	0.534	0.0049	0.0232	0.8327	0.611819	0.00781795
rs6495122	TC	15	75125645	C	A	-0.0109	0.0013	16.2934	-0.0003	0.0064	0.96	0.0024	0.0039	0.534	0.0049	0.0232	0.8327	0.743839	0.00618485
rs9920066	TC	15	89086653	T	A	-0.0088	0.0013	10.8878	0.014	0.0066	0.039	-0.0021	0.0039	0.5887	-0.0048	0.0246	0.8452	0.00177962	0.0291809
rs139271800	logTG	15	90214777	A	G	-0.1926	0.0282	11.0704	-0.23	0.16	0.15	-0.1124	0.0953	0.2382	0.0526	0.3983	0.8948	0.0629092	0.0422496
rs1037117	LDL	15	102068658	G	A	-0.0103	0.0014	12.7261	0.008	0.0074	0.28	-0.0062	0.0042	0.142	0.0512	0.0263	0.05203	0.0045927	0.00901377
rs1037117	logTG	15	102068658	A	G	-0.0149	0.0014	25.7252	-0.008	0.0074	0.28	0.0062	0.0042	0.142	-0.0512	0.0263	0.05203	0.00456406	0.00906232
rs12600110	logTG	16	962154	T	C	-0.0124	0.0013	20.8387	0.018	0.0066	0.0059	-0.0059	0.0039	0.1302	0.0528	0.0243	0.03009	0.00610782	0.0972727
rs9597	TC	16	1374951	C	G	-0.0242	0.0034	11.9595	0.0006	0.018	0.97	0.0024	0.0112	0.833	-0.0949	0.068	0.163	0.00425208	0.0105038
rs74002781	TC	16	2146288	T	C	-0.0115	0.002	8.04942	0.022	0.012	0.056	0.0109	0.0062	0.08112	-0.0504	0.0379	0.1837	0.0101007	0.0284442
rs12921195	logTG	16	4677604	A	C	-0.0166	0.0021	14.5711	-0.013	0.0099	0.19	-0.0069	0.0068	0.3102	0.0227	0.0359	0.5272	0.00211706	0.0209674
rs12445804	LDL	16	11706100	A	G	-0.0293	0.0023	36.4457	0.007	0.012	0.57	-0.0189	0.0064	0.003194	0.0592	0.045	0.189	0.125123	0.00935016
rs12445804	nonHDL	16	11706100	A	G	-0.0304	0.0026	30.8553	0.007	0.012	0.57	-0.0189	0.0064	0.003194	0.0592	0.045	0.189	0.125125	0.0093502
rs12445804	TC	16	11706100	A	G	-0.0305	0.0022	42.978	0.007	0.012	0.57	-0.0189	0.0064	0.003194	0.0592	0.045	0.189	0.125123	0.00935016
rs4780401	logTG	16	11839326	T	G	-0.0092	0.0013	11.8315	-0.0016	0.0065	0.81	-0.0002	0.0038	0.9495	0.01	0.0238	0.6752	0.00151437	0.00465936
rs142861907	LDL	16	14395073	TG	T	-0.0101	0.0015	10.7804	na	na	na	na	na	na	na	na	na	0.00224331	0.0156574
rs142861907	TC	16	14395073	TG	T	-0.0106	0.0014	13.4328	na	na	na	na	na	na	na	na	na	0.00176261	0.00702576
rs12928099	logTG	16	15150505	C	A	-0.0259	0.0015	66.0765	-0.02	0.0069	0.0048	-0.0133	0.0047	0.004279	-0.0101	0.0255	0.6908	0.129017	0.182589
rs12446632	TC	16	19935389	A	G	-0.0141	0.0018	14.3232	0.043	0.0094	5.3e-06	-0.0135	0.0058	0.02076	-0.0469	0.0326	0.1508	0.0309507	0.965084
rs66487676	TC	16	21089905	T	G	-0.0081	0.0012	10.8302	0.0011	0.0064	0.86	0.0169	0.0037	5.033e-06	-0.0265	0.0231	0.2526	0.959074	0.00495867
rs7501203	TC	16	28899411	T	C	-0.008	0.0013	9.12133	0.023	0.007	0.00099	0.0007	0.0041	0.8747	-0.0104	0.0255	0.6841	0.00211215	0.97396
rs11076	TC	16	30995528	A	G	-0.0122	0.0013	20.1997	-0.0078	0.0066	0.24	0.0011	0.004	0.785	-0.0585	0.0238	0.01413	0.00196986	0.0133961
rs140820592	LDL	16	31021880	T	G	-0.0131	0.0014	20.0866	na	na	na	-0.0015	0.0047	0.7568	na	na	na	0.00157351	0.015388
rs55979739	nonHDL	16	31049155	G	A	-0.0147	0.0016	19.3957	-0.009	0.0065	0.17	-0.0013	0.004	0.7516	-0.0441	0.0237	0.06243	0.0016521	0.0159695
rs7196161	logTG	16	31110981	A	G	-0.0139	0.0013	25.9563	-0.027	0.007	0.00013	-0.0052	0.004	0.1864	-0.0679	0.0238	0.004306	0.00454892	0.749214
rs1861649	logTG	16	49886366	T	C	-0.0098	0.0018	7.28427	-0.023	0.0096	0.016	-0.0075	0.0052	0.1442	-0.0163	0.035	0.6414	0.00853752	0.0623011
rs62033400	logTG	16	53811788	G	A	-0.0158	0.0013	33.2618	-0.12	0.0064	1.4e-74	-0.0293	0.004	1.17e-13	-0.0308	0.0234	0.1893	0.92418	0.82531
rs74019283	LDL	16	55870239	G	T	-0.0234	0.0032	12.5813	0.014	0.017	0.42	-0.0056	0.0106	0.6001	0.0529	0.0663	0.4246	0.00394989	0.0175424
rs247617	LDL	16	56990716	C	A	-0.0319	0.0014	114.197	-0.0007	0.0068	0.92	-0.0178	0.004	8.857e-06	-0.0071	0.0244	0.7704	0.951869	0.00491204
rs247617	logTG	16	56990716	C	A	-0.0331	0.0013	142.279	-0.0007	0.0068	0.92	-0.0178	0.004	8.857e-06	-0.0071	0.0244	0.7704	0.922631	0.00493227
rs183130	nonHDL	16	56991363	C	T	-0.0457	0.0016	178.707	-0.0007	0.0068	0.92	-0.018	0.004	7.539e-06	-0.0074	0.0244	0.7608	0.922042	0.0049364
rs183130	TC	16	56991363	T	C	-0.0437	0.0013	247	0.0007	0.0068	0.92	0.018	0.004	7.539e-06	0.0074	0.0244	0.7608	0.922921	0.00493027
rs16942887	logTG	16	67928042	G	A	-0.0155	0.0019	15.4674	-0.0018	0.0099	0.86	0.0101	0.0056	0.07127	-0.0134	0.0349	0.702	0.0101031	0.00753274
rs1476306	TC	16	67973171	T	C	-0.0181	0.0015	32.8002	-0.0024	0.0086	0.78	-0.0078	0.0047	0.09649	-0.0209	0.0306	0.4936	0.0066145	0.00663844
rs56285339	nonHDL	16	69160925	G	A	-0.0116	0.0018	9.93545	0.0041	0.0074	0.58	0.0066	0.0045	0.1419	-0.0221	0.0267	0.4079	0.00598969	0.0164706
rs11540992	TC	16	69376269	G	A	-0.0282	0.0034	15.961	0.023	0.017	0.17	0.0093	0.011	0.3954	0.0754	0.0605	0.2124	0.00608799	0.0277912
rs4783577	LDL	16	69527385	G	A	-0.0174	0.0031	7.70123	0.022	0.014	0.12	0.0321	0.0097	0.0009744	-0.0617	0.0518	0.234	1.54109e-05	9.8246e-07
rs6499240	logTG	16	69686912	G	A	-0.015	0.0013	30.0735	-0.042	0.0064	9.6e-11	-0.0213	0.0041	2.537e-07	-0.0232	0.0234	0.3195	9.00082e-05	0.991667
rs62049432	LDL	16	70375296	A	G	-0.0225	0.0031	12.406	-0.026	0.014	0.072	0.0677	0.0105	1.145e-10	-0.1096	0.0572	0.05549	0.998518	0.0327112
rs62049432	nonHDL	16	70375296	A	G	-0.0313	0.0036	17.4578	-0.026	0.014	0.072	0.0677	0.0105	1.145e-10	-0.1096	0.0572	0.05549	0.999819	0.0416538
rs62049432	TC	16	70375296	A	G	-0.0233	0.003	14.0938	-0.026	0.014	0.072	0.0677	0.0105	1.145e-10	-0.1096	0.0572	0.05549	0.999089	0.0329377
rs77303550	LDL	16	72079657	C	T	-0.0435	0.0016	162.04	-0.034	0.0082	3.6e-05	na	na	na	-0.0116	0.0292	0.6915	0.981755	0.794863
rs77303550	TC	16	72079657	C	T	-0.045	0.0015	197.008	-0.034	0.0082	3.6e-05	na	na	na	-0.0116	0.0292	0.6915	0.996037	0.594276
rs34042070	nonHDL	16	72101525	G	C	-0.0588	0.0018	233.333	-0.028	0.0082	0.00049	-0.0354	0.0045	5.001e-15	0.0202	0.029	0.4865	0.995996	0.590967
rs2000999	logTG	16	72108093	A	G	-0.0218	0.0016	41.5461	-0.03	0.0081	0.00024	-0.0349	0.0045	1.2e-14	0.0132	0.0287	0.646	0.993841	0.740987
rs55725932	TC	16	73095270	C	CTT	-0.0102	0.0015	10.9804	na	na	na	-0.0159	0.0053	0.002762	na	na	na	0.0518173	0.236621
rs7405169	LDL	16	73101013	A	G	-0.0103	0.0015	11.1823	0.02	0.0071	0.0056	0.0125	0.0045	0.005533	0.0167	0.0267	0.5322	0.0788612	0.229553
rs1121985	LDL	16	79363079	C	A	-0.009	0.0013	11.3546	0.0045	0.0065	0.49	-0.0039	0.0039	0.3192	0.0396	0.0247	0.1082	0.00237803	0.00572922
rs1121985	nonHDL	16	79363079	C	A	-0.011	0.0015	12.6488	0.0045	0.0065	0.49	-0.0039	0.0039	0.3192	0.0396	0.0247	0.1082	0.00237165	0.00573281
rs1121985	TC	16	79363079	C	A	-0.0088	0.0012	12.6488	0.0045	0.0065	0.49	-0.0039	0.0039	0.3192	0.0396	0.0247	0.1082	0.00238099	0.00571518
rs17689024	logTG	16	79739978	C	G	-0.0109	0.0013	16.2934	-0.0035	0.0068	0.61	-0.0048	0.004	0.2314	-0.0335	0.0248	0.1777	0.00320535	0.00562475
rs12443634	nonHDL	16	81524274	A	C	-0.0118	0.0017	11.4102	-0.049	0.0071	9.4e-12	-0.0156	0.0044	0.0003924	0.0043	0.0258	0.8689	0.636068	0.999463
rs2925979	logTG	16	81534790	T	C	-0.0254	0.0013	84.2864	-0.053	0.0069	2.1e-14	-0.0162	0.004	4.631e-05	-0.0037	0.025	0.8828	0.707287	0.999956
rs184068091	TC	16	81683801	C	T	-0.3073	0.0649	5.6594	0.98	0.31	0.0019	na	na	na	1.3887	0.9321	0.1363	0.0238495	0.0393645
rs67890964	LDL	16	83979317	T	C	-0.0187	0.0014	39.9681	0.022	0.0066	0.00093	0.0001	0.0041	0.9827	-0.0385	0.0261	0.1405	0.00144793	0.58585
rs67890964	nonHDL	16	83979317	T	C	-0.0181	0.0016	28.9439	0.022	0.0066	0.00093	0.0001	0.0041	0.9827	-0.0385	0.0261	0.1405	0.00143971	0.490098
rs67890964	TC	16	83979317	T	C	-0.0175	0.0013	40.5794	0.022	0.0066	0.00093	0.0001	0.0041	0.9827	-0.0385	0.0261	0.1405	0.00144008	0.490332
rs79311290	logTG	16	85150163	G	A	-0.0191	0.0023	15.9984	-0.022	0.011	0.054	-0.0221	0.0075	0.003187	-0.0014	0.0428	0.9746	0.160633	0.044574
rs17265458	nonHDL	16	86430254	G	A	-0.0127	0.0018	11.7647	-0.012	0.0073	0.1	-0.0036	0.0044	0.4088	-0.0253	0.0266	0.3419	0.00223275	0.0277521
rs8054124	logTG	16	86434553	C	T	-0.012	0.0015	14.9051	-0.012	0.0076	0.13	-0.0028	0.0045	0.5312	-0.0333	0.0274	0.2252	0.0023189	0.0201562
rs12931143	logTG	16	88006065	C	T	-0.0093	0.0014	10.5119	-0.022	0.0063	0.00066	0.006	0.0043	0.163	0.0271	0.0233	0.2442	0.00383092	0.531298
rs35613341	TC	16	88535407	C	G	-0.0137	0.0013	25.2409	-0.02	0.0073	0.006	-0.0223	0.0041	3.645e-08	-0.0274	0.025	0.2731	0.955266	0.115933
rs74035509	LDL	16	88567333	T	C	-0.0233	0.0024	21.5562	-0.022	0.013	0.081	-0.0202	0.0077	0.008489	-0.0882	0.0445	0.0477	0.000955574	0.193092
rs74035509	nonHDL	16	88567333	T	C	-0.0242	0.0028	17.261	-0.022	0.013	0.081	-0.0202	0.0077	0.008489	-0.0882	0.0445	0.0477	0.000312499	0.0361224
rs11870735	logTG	17	481604	T	C	-0.0117	0.0017	11.2301	-0.034	0.0083	4.9e-05	-0.0104	0.0052	0.04543	-0.0158	0.0301	0.5988	0.0128145	0.923761
rs11078597	logTG	17	1618363	C	T	-0.0182	0.0016	29.2541	-0.0066	0.0084	0.43	-0.0068	0.0047	0.1463	0.0337	0.0296	0.2546	0.00487534	0.00804932
rs12948283	nonHDL	17	1622850	C	G	-0.0141	0.0021	10.7236	na	na	na	-0.0055	0.0063	0.3805	na	na	na	0.00243326	0.0096905
rs4480845	LDL	17	1958609	T	C	-0.0093	0.0013	12.0738	-0.016	0.0066	0.017	0.0142	0.004	0.0003547	-0.007	0.0244	0.7752	0.00420016	0.0805115
rs4480845	TC	17	1958609	T	C	-0.012	0.0013	19.5707	-0.016	0.0066	0.017	0.0142	0.004	0.0003547	-0.007	0.0244	0.7752	0.127581	0.133271
rs2089483	LDL	17	4676420	A	G	-0.0142	0.0014	23.4479	0.003	0.0072	0.68	-0.0122	0.0042	0.003622	0.0259	0.0243	0.2875	0.419835	0.00465929
rs79202680	logTG	17	4692640	G	T	-0.1476	0.0089	61.0431	-0.027	0.044	0.55	-0.091	0.0502	0.06995	-0.0779	0.1666	0.6402	0.0833416	0.021753
rs79202680	nonHDL	17	4692640	G	T	-0.1183	0.01	31.5636	-0.027	0.044	0.55	-0.091	0.0502	0.06995	-0.0779	0.1666	0.6402	0.0833394	0.0217548
rs79202680	TC	17	4692640	G	T	-0.1184	0.0087	41.4521	-0.027	0.044	0.55	-0.091	0.0502	0.06995	-0.0779	0.1666	0.6402	0.0833177	0.0217517
rs145437104	LDL	17	5270010	G	A	-0.0647	0.0097	10.5924	-0.044	0.048	0.36	-0.0172	0.0445	0.6996	0.0297	0.1753	0.8656	0.0220177	0.0423233
rs186021206	LDL	17	7069412	G	A	-0.321	0.0106	200.717	0.075	0.046	0.11	-0.1147	0.0588	0.05106	0.2304	0.1725	0.1816	0.0351386	0.0755281
rs186021206	nonHDL	17	7069412	G	A	-0.3179	0.0118	159.135	0.075	0.046	0.11	-0.1147	0.0588	0.05106	0.2304	0.1725	0.1816	0.0351387	0.0755255
rs186021206	TC	17	7069412	G	A	-0.2663	0.0101	152.477	0.075	0.046	0.11	-0.1147	0.0588	0.05106	0.2304	0.1725	0.1816	0.0351386	0.0755225
rs200489612	logTG	17	7106378	G	A	-0.1134	0.012	20.47	0.053	0.054	0.33	-0.1497	0.0599	0.01242	0.1946	0.2139	0.3631	0.101583	0.044887
rs9894946	LDL	17	7571080	A	G	-0.0169	0.0019	18.2324	-0.027	0.0089	0.0021	0.0011	0.0058	0.8447	-0.008	0.0316	0.7994	0.003117	0.00763481
rs9894946	nonHDL	17	7571080	A	G	-0.0226	0.0022	24.0291	-0.027	0.0089	0.0021	0.0011	0.0058	0.8447	-0.008	0.0316	0.7994	0.00193172	0.283253
rs9894946	TC	17	7571080	A	G	-0.0197	0.0018	27.1509	-0.027	0.0089	0.0021	0.0011	0.0058	0.8447	-0.008	0.0316	0.7994	0.00313264	0.00727303
rs9908765	LDL	17	8214427	A	G	-0.0136	0.0013	24.887	0.0004	0.0064	0.95	-0.0117	0.0038	0.002076	0.0155	0.023	0.4988	0.112053	0.00500561
rs871841	TC	17	8216468	C	T	-0.0147	0.0012	33.7747	0.0007	0.0064	0.91	-0.0111	0.0038	0.003454	0.0168	0.0229	0.463	0.0905371	0.00487568
rs2270445	nonHDL	17	8219478	G	A	-0.0127	0.0015	16.5977	0.0043	0.0064	0.5	-0.0105	0.0039	0.006558	0.0147	0.0231	0.5246	0.103298	0.004822
rs77902029	LDL	17	9791780	A	T	-0.0101	0.0015	10.7804	-0.038	0.0068	3.3e-08	-0.0061	0.0045	0.1814	0.0307	0.0253	0.2246	0.00482759	0.952549
rs77902029	TC	17	9791780	A	T	-0.0117	0.0014	16.1921	-0.038	0.0068	3.3e-08	-0.0061	0.0045	0.1814	0.0307	0.0253	0.2246	0.00450561	0.913865
rs9897362	logTG	17	17456746	A	G	-0.0272	0.0025	26.843	-0.0058	0.013	0.66	0.0022	0.0075	0.7646	-0.0053	0.0482	0.9124	8.42013e-05	0.000129465
rs71367414	nonHDL	17	17634550	C	T	-0.014	0.0021	10.5822	-0.018	0.0082	0.026	-0.0145	0.0054	0.007268	-0.0309	0.0321	0.3343	0.000691002	0.00444728
rs3088233	TC	17	18112675	T	C	-0.0139	0.0015	19.7166	-0.019	0.008	0.017	-0.0155	0.0049	0.001599	-0.0118	0.0288	0.6813	0.000306725	0.0515029
rs62072467	LDL	17	18116455	T	C	-0.0133	0.0017	14.2894	-0.019	0.0081	0.017	-0.0147	0.0054	0.006656	-0.0042	0.0293	0.8848	0.000924307	0.0513173
rs9909417	LDL	17	18679442	A	G	-0.0097	0.0014	11.3715	0.0036	0.007	0.61	0.002	0.0042	0.6328	-0.0056	0.0257	0.8281	0.00176807	0.00610694
rs7215815	TC	17	21281466	A	G	-0.0086	0.0013	10.4311	-0.026	0.0067	0.00012	-0.0071	0.0041	0.08471	0.0145	0.0247	0.5566	0.0083754	0.806984
rs704	LDL	17	26694861	A	G	-0.0194	0.0013	49.6322	0.0031	0.0064	0.63	-0.0084	0.0037	0.02488	-0.0154	0.0228	0.4989	0.0177764	0.00528336
rs704	logTG	17	26694861	G	A	-0.0112	0.0012	19.9889	-0.0031	0.0064	0.63	0.0084	0.0037	0.02488	0.0154	0.0228	0.4989	0.0177669	0.0052821
rs704	nonHDL	17	26694861	A	G	-0.0145	0.0015	21.3791	0.0031	0.0064	0.63	-0.0084	0.0037	0.02488	-0.0154	0.0228	0.4989	0.0177742	0.00529622
rs12601110	TC	17	27035335	A	G	-0.022	0.0021	24.9542	0.008	0.011	0.48	-0.0195	0.0059	0.0009911	-0.0269	0.0407	0.5084	0.29288	0.0109013
rs56336338	nonHDL	17	27645258	G	A	-0.0171	0.0021	15.4133	0.0023	0.0094	0.81	-0.0174	0.0055	0.001553	-0.0317	0.0345	0.3578	0.180076	0.00254506
rs56853305	TC	17	27648542	G	A	-0.02	0.0018	27.9556	0.0028	0.0094	0.76	-0.0179	0.0054	0.0008959	-0.0302	0.0345	0.3805	0.170979	0.00253929
rs62070804	logTG	17	27889643	T	C	-0.0405	0.0052	14.1686	-0.0086	0.025	0.73	-0.0233	0.0157	0.1365	-0.0089	0.0951	0.9255	2.4259e-07	0.0150727
rs111919672	LDL	17	28583498	C	G	-0.02	0.0029	11.2734	0.033	0.012	0.0081	-0.0321	0.0106	0.002482	-0.0494	0.0491	0.3141	0.00537798	0.146925
rs11870192	TC	17	28640992	G	C	-0.0104	0.0014	12.9595	0.0023	0.007	0.74	0.0089	0.0045	0.04749	-0.0077	0.0259	0.7651	0.000268702	0.00435811
rs2940182	nonHDL	17	29410944	G	A	-0.018	0.0016	28.6353	0.013	0.0069	0.055	0.0024	0.0043	0.5792	-0.01	0.026	0.7011	0.00173814	0.001854
rs2008998	LDL	17	29413614	A	G	-0.0175	0.0014	35.127	0.016	0.0069	0.018	0.0031	0.0043	0.4783	-0.0059	0.0258	0.8181	0.00188408	0.00269123
rs2008998	TC	17	29413614	A	G	-0.0174	0.0014	34.7378	0.016	0.0069	0.018	0.0031	0.0043	0.4783	-0.0059	0.0258	0.8181	0.00172357	0.00297639
rs757225592	nonHDL	17	32893285	A	T	-0.3918	0.0784	6.23587	0.22	0.28	0.44	na	na	na	-0.1496	1.0611	0.8879	0.00193112	0.00454134
rs4796223	logTG	17	34841617	T	G	-0.0086	0.0013	10.4311	-0.024	0.0063	0.00012	-0.01	0.0037	0.00654	0.0153	0.0232	0.5117	0.0576426	0.97264
rs12603276	nonHDL	17	34946547	T	C	-0.0104	0.0015	11.3861	-0.025	0.0063	0.0001	-0.0099	0.0038	0.009646	0.0118	0.0229	0.6056	0.0556659	0.958697
rs640306	nonHDL	17	37067261	T	C	-0.0095	0.0016	8.5385	0.0018	0.0067	0.79	0.002	0.004	0.6147	0.002	0.0243	0.9348	0.00162414	0.00493458
rs525767	LDL	17	37070737	A	G	-0.0102	0.0013	14.3676	0.002	0.0067	0.77	0.0014	0.0039	0.7209	0.0097	0.0242	0.689	0.00157405	0.00486825
rs525767	TC	17	37070737	A	G	-0.0092	0.0013	11.8315	0.002	0.0067	0.77	0.0014	0.0039	0.7209	0.0097	0.0242	0.689	0.00160439	0.00488221
rs4795393	TC	17	37893484	T	C	-0.013	0.0013	22.817	0.022	0.0067	0.00094	0.0078	0.0039	0.04385	-0.0046	0.0239	0.8492	0.434046	0.897408
rs12943633	LDL	17	37970365	C	T	-0.0146	0.0023	9.66079	-0.0098	0.012	0.4	-0.0147	0.0069	0.03332	0.0567	0.0435	0.1923	0.866365	0.0164375
rs13412	nonHDL	17	39967442	T	C	-0.011	0.0016	11.2077	-0.012	0.0067	0.07	0.0023	0.0039	0.5472	-0.0528	0.0241	0.02839	0.00193124	0.0231375
rs62075782	TC	17	40536804	G	C	-0.0123	0.0016	13.8238	-0.013	0.0077	0.093	0.0013	0.0057	0.8194	-0.0147	0.0286	0.6071	3.93475e-05	1.3797e-06
rs2354155	LDL	17	40546652	G	A	-0.0086	0.0014	9.09125	-0.026	0.0065	6.6e-05	-0.0168	0.004	3.218e-05	0.0023	0.0241	0.9242	0.841652	0.00767735
rs34349578	nonHDL	17	40598129	A	G	-0.0119	0.0019	9.42336	na	na	na	-0.0208	0.0052	5.721e-05	na	na	na	0.960991	0.0240234
rs6963	logTG	17	40731597	A	T	-0.0131	0.0014	20.0866	-0.048	0.007	1.1e-11	-0.0266	0.004	4.818e-11	-0.0312	0.0258	0.2254	0.90258	0.987389
rs62079603	logTG	17	41387617	G	A	-0.0129	0.0015	17.0985	na	na	na	-0.0215	0.0049	1.188e-05	na	na	na	0.00532861	0.211329
rs72836561	LDL	17	41926126	C	T	-0.0324	0.004	15.26	0.016	0.019	0.4	0.0481	0.0126	0.0001339	0.0194	0.0671	0.7724	0.821771	0.0172894
rs72836561	logTG	17	41926126	T	C	-0.1491	0.0039	319.061	-0.016	0.019	0.4	-0.0481	0.0126	0.0001339	-0.0194	0.0671	0.7724	0.82207	0.0172792
rs72836561	TC	17	41926126	C	T	-0.0375	0.0038	22.2437	0.016	0.019	0.4	0.0481	0.0126	0.0001339	0.0194	0.0671	0.7724	0.822058	0.0172795
rs72824773	logTG	17	42626279	A	G	-0.0746	0.0099	13.3125	-0.041	0.042	0.33	0.0391	0.0647	0.545	-0.2377	0.2102	0.2581	0.0256233	0.0152751
rs197923	TC	17	45008742	C	G	-0.0104	0.0013	14.9051	0.0038	0.0066	0.57	-0.0256	0.0039	5.071e-11	-0.0051	0.0243	0.8329	0.814285	0.00598478
rs12603290	TC	17	45650196	T	C	-0.0255	0.0012	99.4819	-0.0082	0.0063	0.2	-0.0233	0.0039	3.404e-09	-0.0021	0.0232	0.9268	0.830035	0.0111459
rs8077106	nonHDL	17	45653291	T	G	-0.0239	0.0015	56.4295	-0.0083	0.0063	0.19	-0.0232	0.0039	3.515e-09	-0.002	0.0232	0.9312	0.859251	0.0107744
rs7207542	logTG	17	45697549	G	C	-0.0095	0.0013	12.5658	0.0075	0.0061	0.22	0.0203	0.0037	4.783e-08	-0.0073	0.0231	0.7515	0.949544	0.010259
rs11870935	LDL	17	45732605	G	A	-0.0264	0.0013	90.9588	-0.0079	0.0062	0.21	-0.0218	0.0037	4.137e-09	-0.0006	0.0229	0.9794	0.981692	0.0104749
rs10775406	logTG	17	46197755	G	A	-0.0143	0.0014	23.7667	-0.03	0.0074	6e-05	0.0077	0.0042	0.06314	0.0328	0.0265	0.2166	0.000292425	0.268396
rs12942428	TC	17	46529501	T	C	-0.0129	0.0013	22.4809	0.0099	0.0068	0.15	0.0008	0.0039	0.8287	-0.0161	0.0248	0.5157	0.00151024	0.00757404
rs3809782	LDL	17	46657927	A	G	-0.0136	0.0013	24.887	0.014	0.0066	0.036	-0.0031	0.004	0.4303	-0.0064	0.0241	0.7911	0.00193829	0.0196197
rs2288278	nonHDL	17	46661292	A	G	-0.0135	0.0016	16.4892	0.013	0.0066	0.047	-0.0022	0.004	0.585	-0.0033	0.0242	0.8904	0.0023968	0.0120794
rs28394864	logTG	17	47450775	A	G	-0.0143	0.0013	27.4178	-0.0024	0.0064	0.71	-0.0274	0.0038	9.435e-13	0.0123	0.0233	0.5984	0.884246	0.00493088
rs9890200	logTG	17	48624523	A	C	-0.0081	0.0013	9.33334	-0.028	0.0066	2.9e-05	-0.0035	0.0041	0.3914	-0.0292	0.0241	0.2256	0.00323271	0.92549
rs41524846	TC	17	49252238	T	C	-0.0093	0.0014	10.5119	-0.0078	0.0072	0.28	0.0022	0.0045	0.6209	0.0319	0.026	0.221	1.14797e-06	0.0116193
rs9896627	nonHDL	17	49328705	C	T	-0.0123	0.0017	12.333	-0.011	0.0073	0.15	0.002	0.0045	0.6594	0.03	0.0268	0.2628	9.31764e-08	0.0134809
rs14180	logTG	17	49338257	C	T	-0.014	0.0021	10.5822	-0.0049	0.01	0.63	0.003	0.0061	0.6224	0.007	0.0368	0.8495	3.92695e-06	0.0163985
rs8066617	logTG	17	55210713	A	G	-0.0101	0.0013	14.1026	-0.012	0.0067	0.08	-0.0087	0.0039	0.02467	-0.0382	0.0255	0.134	0.0151024	0.0214521
rs116985917	TC	17	56409956	T	C	-0.0151	0.0021	12.19	-0.0038	0.012	0.74	0.008	0.0067	0.2315	-0.0315	0.0437	0.4716	0.0042514	0.00775012
rs1292072	logTG	17	57925649	G	A	-0.0153	0.0015	23.7027	-0.003	0.0077	0.7	-0.0201	0.0045	6.447e-06	0.0072	0.0282	0.7988	0.967943	0.00710665
rs1292071	LDL	17	57926911	T	C	-0.0107	0.0013	15.7305	-0.0082	0.0063	0.2	0.0066	0.0038	0.08225	-0.004	0.0231	0.8629	0.00024529	0.00967223
rs1292071	TC	17	57926911	T	C	-0.0086	0.0012	12.1144	-0.0082	0.0063	0.2	0.0066	0.0038	0.08225	-0.004	0.0231	0.8629	0.000244419	0.00989543
rs1801689	LDL	17	64210580	C	A	-0.0896	0.0042	100.254	-0.017	0.02	0.4	-0.0295	0.0123	0.01634	-0.1831	0.0654	0.005108	0.0921183	0.0187279
rs1801689	logTG	17	64210580	A	C	-0.0602	0.0041	48.0813	0.017	0.02	0.4	0.0295	0.0123	0.01634	0.1831	0.0654	0.005108	0.0766966	0.0187437
rs8178824	nonHDL	17	64224775	T	C	-0.0634	0.0052	33.4665	-0.018	0.02	0.39	-0.031	0.0125	0.01283	-0.1845	0.0665	0.005511	0.093846	0.0187988
rs8178824	TC	17	64224775	T	C	-0.062	0.004	53.4598	-0.018	0.02	0.39	-0.031	0.0125	0.01283	-0.1845	0.0665	0.005511	0.0948823	0.0187399
rs9893194	nonHDL	17	65109591	G	T	-0.0139	0.0015	19.7166	-0.0052	0.0066	0.43	-0.01	0.0038	0.008859	0.0364	0.0231	0.1146	0.0302517	0.00667159
rs6504487	TC	17	65123352	A	C	-0.0119	0.0012	22.4531	-0.0054	0.0066	0.42	-0.0083	0.0038	0.03085	0.0336	0.0229	0.1426	0.0173619	0.00669293
rs12450155	LDL	17	65140921	C	A	-0.0123	0.0013	20.5179	-0.0053	0.0064	0.41	-0.0104	0.0038	0.006177	0.037	0.0229	0.1067	0.0211461	0.0069093
rs4790985	logTG	17	65272255	A	G	-0.009	0.0014	9.89005	-0.016	0.0067	0.016	-0.0079	0.0041	0.05444	0.0296	0.0251	0.2387	0.0203355	0.216803
rs8073510	LDL	17	65839210	G	A	-0.0159	0.0016	22.5438	-0.051	0.008	1.4e-10	-0.0242	0.0045	7.313e-08	0.0019	0.0289	0.9475	0.884989	0.898679
rs8073510	nonHDL	17	65839210	G	A	-0.0214	0.0018	31.869	-0.051	0.008	1.4e-10	-0.0242	0.0045	7.313e-08	0.0019	0.0289	0.9475	0.89457	0.868159
rs8073510	TC	17	65839210	G	A	-0.016	0.0015	25.8364	-0.051	0.008	1.4e-10	-0.0242	0.0045	7.313e-08	0.0019	0.0289	0.9475	0.877778	0.876368
rs11656743	logTG	17	65980289	G	A	-0.0231	0.0015	52.786	-0.048	0.0079	8.3e-10	-0.0214	0.0043	8.252e-07	0.007	0.0283	0.8045	0.937133	0.921992
rs9889884	LDL	17	66394054	C	T	-0.0127	0.0016	14.6855	-0.0043	0.0076	0.57	-0.0258	0.0047	5.647e-08	0.0261	0.0279	0.3492	0.967175	0.00635752
rs77542162	LDL	17	67081278	G	A	-0.1832	0.005	293.18	0.055	0.024	0.019	-0.0235	0.0155	0.129	0.1354	0.0836	0.1055	0.0184016	0.195086
rs77542162	logTG	17	67081278	A	G	-0.0485	0.005	21.5207	-0.055	0.024	0.019	0.0235	0.0155	0.129	-0.1354	0.0836	0.1055	0.0184016	0.195086
rs77542162	nonHDL	17	67081278	G	A	-0.1587	0.006	153.438	0.055	0.024	0.019	-0.0235	0.0155	0.129	0.1354	0.0836	0.1055	0.0184028	0.195086
rs77542162	TC	17	67081278	G	A	-0.1431	0.0048	194.57	0.055	0.024	0.019	-0.0235	0.0155	0.129	0.1354	0.0836	0.1055	0.0184016	0.195086
rs9890133	LDL	17	68169005	G	A	-0.0146	0.002	12.541	0.033	0.01	0.0011	-0.0082	0.0059	0.1669	-0.0456	0.0371	0.2197	0.00524696	0.645013
rs9890133	nonHDL	17	68169005	G	A	-0.0169	0.0023	12.6958	0.033	0.01	0.0011	-0.0082	0.0059	0.1669	-0.0456	0.0371	0.2197	0.00492875	0.604264
rs9890133	TC	17	68169005	G	A	-0.0143	0.0018	14.7098	0.033	0.01	0.0011	-0.0082	0.0059	0.1669	-0.0456	0.0371	0.2197	0.0054195	0.697438
rs1396514	logTG	17	68431026	C	T	-0.0112	0.0013	17.1567	-0.01	0.0063	0.11	-0.0053	0.0037	0.1526	-0.0306	0.0235	0.192	0.0055266	0.0136205
rs1029645	logTG	17	70295760	A	G	-0.0086	0.0012	12.1144	-0.025	0.0063	7.5e-05	-0.0012	0.0037	0.7454	-0.0492	0.0229	0.03213	0.00157352	0.918787
rs7222784	logTG	17	73272060	A	T	-0.0106	0.0015	11.7994	na	na	na	-0.0062	0.0052	0.2309	na	na	na	0.00150817	0.00228046
rs4485425	LDL	17	73767437	G	A	-0.0172	0.0014	33.9662	-0.0058	0.0071	0.42	-0.0212	0.0041	2.003e-07	0.0129	0.0252	0.6084	0.726336	0.00672509
rs4485425	nonHDL	17	73767437	G	A	-0.017	0.0017	22.817	-0.0058	0.0071	0.42	-0.0212	0.0041	2.003e-07	0.0129	0.0252	0.6084	0.754841	0.00804098
rs4485425	TC	17	73767437	G	A	-0.0156	0.0014	28.1102	-0.0058	0.0071	0.42	-0.0212	0.0041	2.003e-07	0.0129	0.0252	0.6084	0.708773	0.0104066
rs193220	logTG	17	74268619	C	T	-0.012	0.0014	16.9905	-0.0086	0.0069	0.22	-0.0083	0.004	0.03841	-0.039	0.0248	0.1164	0.00453159	0.50555
rs11657987	LDL	17	76387363	T	G	-0.0174	0.0013	40.1285	0.015	0.0064	0.021	-0.0047	0.0038	0.2089	0.0145	0.0244	0.5519	0.00314835	0.0777225
rs11657987	nonHDL	17	76387363	T	G	-0.0121	0.0015	15.1412	0.015	0.0064	0.021	-0.0047	0.0038	0.2089	0.0145	0.0244	0.5519	0.00299601	0.0678023
rs11657987	TC	17	76387363	T	G	-0.0199	0.0012	61.0363	0.015	0.0064	0.021	-0.0047	0.0038	0.2089	0.0145	0.0244	0.5519	0.0029714	0.067693
rs12450500	logTG	17	76395750	C	T	-0.0187	0.0013	46.1895	-0.015	0.0065	0.023	0.0005	0.0037	0.8901	-0.024	0.0238	0.3131	0.00172159	0.161441
rs9905991	logTG	17	80052073	A	G	-0.0102	0.0013	14.3676	-0.0097	0.0064	0.13	-0.0037	0.004	0.3627	-0.021	0.0237	0.3752	0.00185865	0.0134933
rs12950377	TC	17	81011652	C	T	-0.0116	0.0017	11.0514	0.0005	0.0091	0.96	-0.0005	0.0054	0.9272	0.0297	0.0336	0.3765	0.00226255	0.00624633
rs8083730	logTG	18	293519	G	A	-0.0157	0.0021	13.1163	0.0048	0.012	0.68	0.0028	0.0061	0.6515	-0.0515	0.0482	0.2852	0.0131842	0.0133399
rs11664106	logTG	18	2846812	A	T	-0.0108	0.0015	12.2203	-0.021	0.007	0.0033	-0.0066	0.0045	0.1458	0.0162	0.0278	0.5602	0.00486351	0.265239
rs3016593	TC	18	2989738	G	A	-0.008	0.0012	10.5822	0.0025	0.0066	0.71	0.0083	0.0039	0.03422	-0.0051	0.0239	0.8292	0.0254845	0.00535845
rs2840354	LDL	18	9545961	T	C	-0.0118	0.0016	12.7842	0.018	0.0082	0.03	0.004	0.0048	0.4041	0.0079	0.0294	0.787	0.0179775	0.0535271
rs2840354	TC	18	9545961	T	C	-0.012	0.0016	13.1951	0.018	0.0082	0.03	0.004	0.0048	0.4041	0.0079	0.0294	0.787	0.0263586	0.0407936
rs3809898	logTG	18	13725674	C	A	-0.0109	0.0013	16.2934	0.0012	0.0065	0.85	-0.0041	0.004	0.3102	0.0302	0.0246	0.2204	0.00230731	0.0050577
rs35321365	logTG	18	19905141	C	T	-0.0111	0.0013	16.8664	-0.018	0.0063	0.0048	-0.0123	0.0039	0.001524	0.0055	0.0234	0.8129	2.17866e-07	0.182601
rs2510344	nonHDL	18	21113285	T	C	-0.0066	0.0015	4.96557	-0.026	0.0063	4.7e-05	-0.0113	0.0037	0.002174	-0.0322	0.023	0.1603	0.318373	0.738458
rs2960578	logTG	18	21143739	T	G	-0.0144	0.0013	27.7895	-0.026	0.0063	3.4e-05	-0.0136	0.0039	0.0005339	-0.0343	0.0231	0.1383	0.10084	0.7398
rs150261265	logTG	18	29772887	C	T	-0.1901	0.0239	14.7432	0.0094	0.14	0.95	na	na	na	-2.0793	1.1359	0.06717	0.00136902	0.0283254
rs75763843	TC	18	42062380	A	C	-0.0116	0.0018	9.93545	-0.021	0.0095	0.026	-0.009	0.0054	0.09937	0.038	0.0341	0.2655	0.0114809	0.0692722
rs12962548	logTG	18	42599167	A	G	-0.0083	0.0013	9.7649	-0.019	0.0069	0.0062	-0.0042	0.0039	0.2797	-0.0014	0.0252	0.9545	0.00268854	0.185382
rs538969346	LDL	18	46545976	C	G	-0.0543	0.0072	13.3335	0.0096	0.035	0.78	-0.004	0.0293	0.8906	-0.1078	0.1232	0.3813	2.35255e-12	0.0228091
rs538969346	nonHDL	18	46545976	C	G	-0.0591	0.0086	11.1988	0.0096	0.035	0.78	-0.004	0.0293	0.8906	-0.1078	0.1232	0.3813	2.61146e-12	0.0228048
rs538969346	TC	18	46545976	C	G	-0.1207	0.0069	67.7886	0.0096	0.035	0.78	-0.004	0.0293	0.8906	-0.1078	0.1232	0.3813	2.16442e-12	0.0228439
rs77960347	LDL	18	47109955	G	A	-0.068	0.006	29.0471	-0.015	0.029	0.59	0.0644	0.0189	0.0006468	-0.0396	0.1006	0.6941	0.0212046	0.0242137
rs77960347	nonHDL	18	47109955	G	A	-0.0815	0.0072	28.9782	-0.015	0.029	0.59	0.0644	0.0189	0.0006468	-0.0396	0.1006	0.6941	0.0201772	0.0240407
rs77960347	TC	18	47109955	G	A	-0.1733	0.0058	195.437	-0.015	0.029	0.59	0.0644	0.0189	0.0006468	-0.0396	0.1006	0.6941	0.0200052	0.0242188
rs143376213	TC	18	47632322	C	T	-0.0846	0.0068	34.8064	0.0077	0.035	0.82	0.0372	0.0216	0.08588	-0.0581	0.1268	0.647	0.0309295	0.022867
rs12963741	nonHDL	18	55322011	T	C	-0.0164	0.0024	11.0811	0.039	0.0097	5.7e-05	-0.0095	0.0065	0.1447	0.0437	0.0354	0.2174	0.00830045	0.924199
rs12968116	LDL	18	55322502	T	C	-0.0138	0.002	11.284	0.039	0.0097	4.8e-05	-0.0102	0.0065	0.1159	0.0439	0.0353	0.2144	0.00838954	0.925265
rs12968116	TC	18	55322502	T	C	-0.0178	0.002	18.253	0.039	0.0097	4.8e-05	-0.0102	0.0065	0.1159	0.0439	0.0353	0.2144	0.00835604	0.924943
rs143393480	logTG	18	56089858	T	G	-0.0541	0.0071	13.5948	-0.012	0.034	0.72	-0.0534	0.0224	0.01707	-0.2681	0.1223	0.02835	0.101037	0.0222261
rs1457489	logTG	18	57861961	A	G	-0.0135	0.0014	21.2782	-0.053	0.0071	1.2e-13	-0.0241	0.0042	7.661e-09	0.0055	0.0262	0.8339	0.85125	0.954382
rs12454712	logTG	18	60845884	T	C	-0.0148	0.0013	29.302	-0.049	0.0067	5.1e-13	-0.0153	0.0039	7.443e-05	-0.0272	0.0237	0.2523	0.78879	1
rs402348	LDL	18	61034420	T	G	-0.01	0.0016	9.38674	0.028	0.008	0.00035	0.0002	0.0045	0.9563	0.0109	0.0308	0.7226	0.00202802	0.73991
rs12454507	LDL	18	77825981	G	A	-0.009	0.0014	9.89005	-0.0011	0.007	0.88	-0.0047	0.0041	0.2537	-0.0424	0.0255	0.09671	0.00476713	0.00571703
rs11081591	nonHDL	18	77880802	G	A	-0.0146	0.0021	11.4447	-0.0009	0.0094	0.92	-0.0082	0.0051	0.1104	-0.0597	0.0342	0.08048	0.00802116	0.00713627
rs8113356	LDL	19	795816	A	G	-0.0133	0.0019	11.5918	-0.006	0.0098	0.54	-0.0085	0.0057	0.1382	-0.018	0.0329	0.5837	0.00712046	0.0052537
rs8113356	nonHDL	19	795816	A	G	-0.0165	0.0022	13.1951	-0.006	0.0098	0.54	-0.0085	0.0057	0.1382	-0.018	0.0329	0.5837	0.00711983	0.00562302
rs1135908	logTG	19	808742	T	G	-0.0136	0.0018	13.3798	-0.0067	0.01	0.52	-0.0109	0.0058	0.06245	-0.0243	0.033	0.4617	0.00884433	0.00557499
rs4807632	TC	19	1171020	A	G	-0.0113	0.0017	10.5243	-0.014	0.0091	0.13	-0.0097	0.0047	0.03999	0.0175	0.0314	0.5779	0.00641006	0.00179424
rs1736194	nonHDL	19	2786397	G	C	-0.0137	0.0016	16.9568	0.011	0.0068	0.099	-0.001	0.0041	0.798	0.0224	0.0261	0.39	0.00187156	0.0220302
rs1640267	LDL	19	2789337	C	T	-0.0162	0.0014	30.2402	0.013	0.007	0.076	-0.0015	0.0042	0.7268	0.0231	0.026	0.3751	0.00188412	0.0233368
rs1640269	TC	19	2793194	C	A	-0.0168	0.0013	37.4769	0.012	0.007	0.081	-0.0022	0.0041	0.595	0.0231	0.0259	0.3728	0.00184263	0.0220265
rs11267575	TC	19	3474213	T	TCAGGGCTCAAAGTC	-0.0109	0.0016	11.0181	na	na	na	na	na	na	na	na	na	0.00215456	0.00524303
rs350885	logTG	19	4147445	C	A	-0.0162	0.0015	26.4632	-0.0025	0.0075	0.74	-0.0033	0.0044	0.459	0.0399	0.0262	0.1279	0.00204045	0.00531903
rs34054295	LDL	19	4478062	A	G	-0.0115	0.0013	18.0429	0.0011	0.0067	0.87	-0.0052	0.0038	0.1705	-0.0076	0.0237	0.7477	0.00373328	0.0047818
rs34054295	nonHDL	19	4478062	A	G	-0.0117	0.0016	12.5813	0.0011	0.0067	0.87	-0.0052	0.0038	0.1705	-0.0076	0.0237	0.7477	0.0205689	0.0057602
rs34054295	TC	19	4478062	A	G	-0.0123	0.0012	23.9269	0.0011	0.0067	0.87	-0.0052	0.0038	0.1705	-0.0076	0.0237	0.7477	0.00374526	0.00478138
rs35502362	logTG	19	4966041	C	T	-0.0141	0.0014	23.1314	-0.029	0.0067	1.8e-05	-0.0178	0.0043	3.71e-05	0.0016	0.0242	0.9467	0.0691098	0.0951445
rs10409772	LDL	19	5840926	A	C	-0.0168	0.002	16.3502	-0.0078	0.012	0.51	-0.0062	0.0055	0.258	0.0285	0.0426	0.5035	0.00304946	0.0101622
rs10409772	nonHDL	19	5840926	A	C	-0.0169	0.0024	11.7214	-0.0078	0.012	0.51	-0.0062	0.0055	0.258	0.0285	0.0426	0.5035	0.00301049	0.0101932
rs10409772	TC	19	5840926	A	C	-0.0162	0.0019	16.8208	-0.0078	0.012	0.51	-0.0062	0.0055	0.258	0.0285	0.0426	0.5035	0.00395132	0.0136473
rs4804413	logTG	19	7222655	T	C	-0.0189	0.0013	47.1603	-0.032	0.0064	4.9e-07	-0.0013	0.0038	0.7257	-0.0206	0.0234	0.378	0.00166664	0.426628
rs11260029	TC	19	7827576	C	T	-0.0124	0.0014	18.0857	-0.004	0.0071	0.58	-0.0049	0.0044	0.259	-0.0162	0.0256	0.5279	0.00310845	0.00381559
rs11672003	logTG	19	7909765	A	G	-0.0131	0.0015	17.6068	-0.032	0.0072	1.2e-05	-0.0103	0.0045	0.02287	-0.0297	0.0264	0.2604	0.0207268	0.997588
rs73923949	LDL	19	8022788	C	T	-0.018	0.0185	0.480741	na	na	na	na	na	na	1.903	2.3195	0.412	0.0061613	0.000414491
rs116843064	logTG	19	8429323	G	A	-0.2381	0.0048	536.1	-0.099	0.024	2.3e-05	-0.1369	0.0156	1.919e-18	-0.0149	0.0809	0.854	1	0.98939
rs116843064	nonHDL	19	8429323	G	A	-0.0685	0.0058	31.462	-0.099	0.024	2.3e-05	-0.1369	0.0156	1.919e-18	-0.0149	0.0809	0.854	1	0.989392
rs7252574	TC	19	8441779	T	C	-0.0108	0.0012	18.6464	0.014	0.0064	0.027	0.0149	0.004	0.0002344	0.0489	0.0232	0.0349	6.00484e-12	0.0466596
rs555628099	logTG	19	8945880	A	G	-0.0906	0.0106	16.8991	-0.036	0.049	0.46	0.0085	0.0553	0.8776	-0.2087	0.191	0.2744	0.0205292	0.0293277
rs1042540024	LDL	19	9901805	G	A	-0.2335	0.0303	13.8876	0.097	0.16	0.54	na	na	na	na	na	na	0.00301818	0.0446679
rs1042540024	TC	19	9901805	G	A	-0.2106	0.03	11.6539	0.097	0.16	0.54	na	na	na	na	na	na	0.000910758	0.0446614
rs10409243	logTG	19	10332988	C	T	-0.0088	0.0013	10.8878	-0.0045	0.0066	0.5	-0.0091	0.004	0.02116	-0.0133	0.024	0.5809	0.0255636	0.00740457
rs73015024	LDL	19	11197598	G	T	-0.2141	0.002	2490.57	0.025	0.01	0.013	-0.0963	0.0062	4.858e-54	-0.0037	0.0357	0.9181	0.980883	0.13765
rs73015024	nonHDL	19	11197598	G	T	-0.2106	0.0025	1542.98	0.025	0.01	0.013	-0.0963	0.0062	4.858e-54	-0.0037	0.0357	0.9181	0.924301	0.133516
rs73015024	TC	19	11197598	G	T	-0.1842	0.002	1843.99	0.025	0.01	0.013	-0.0963	0.0062	4.858e-54	-0.0037	0.0357	0.9181	0.0364925	0.133452
rs145464906	logTG	19	11350874	C	T	-0.3683	0.0318	30.2925	0.15	0.18	0.38	-0.34	0.1101	0.002009	-0.2794	0.3955	0.4799	1.41833e-11	0.0748724
rs753931089	nonHDL	19	12295949	A	G	-0.3399	0.031	27.2472	-0.11	0.1	0.28	na	na	na	-0.7578	0.9799	0.4393	0.0131219	0.031217
rs573388588	LDL	19	12784944	C	T	-0.299	0.0352	16.7009	0.037	0.24	0.88	na	na	na	-0.2254	0.6997	0.7474	0.00139557	0.0601881
rs573388588	TC	19	12784944	C	T	-0.2607	0.0336	14.0673	0.037	0.24	0.88	na	na	na	-0.2254	0.6997	0.7474	0.00211102	0.0601836
rs527932938	LDL	19	13295968	C	T	-0.2482	0.032	14.0581	0.53	0.22	0.016	na	na	na	-0.3224	0.8072	0.6896	0.416352	0.0241439
rs527932938	nonHDL	19	13295968	C	T	-0.2376	0.0313	13.4985	0.53	0.22	0.016	na	na	na	-0.3224	0.8072	0.6896	0.823292	0.0241766
rs527932938	TC	19	13295968	C	T	-0.215	0.0302	11.9644	0.53	0.22	0.016	na	na	na	-0.3224	0.8072	0.6896	0.510738	0.0234921
rs36014207	LDL	19	14172728	C	T	-0.01	0.0014	12.039	0.0067	0.0069	0.33	-0.0078	0.0041	0.05871	0.0017	0.0242	0.9435	0.00840403	0.00643573
rs10421262	TC	19	14172951	T	G	-0.009	0.0013	11.3546	0.0051	0.0069	0.46	-0.0079	0.0041	0.05271	0.0069	0.0242	0.7761	0.00838355	0.00680683
rs660247	LDL	19	15796507	G	A	-0.0101	0.0013	14.1026	0.0042	0.0065	0.52	-0.0023	0.0037	0.5304	0.0278	0.0231	0.2287	0.00168362	0.00566373
rs660247	nonHDL	19	15796507	G	A	-0.0103	0.0015	11.1823	0.0042	0.0065	0.52	-0.0023	0.0037	0.5304	0.0278	0.0231	0.2287	0.00164975	0.00566454
rs660247	TC	19	15796507	G	A	-0.0104	0.0012	17.3517	0.0042	0.0065	0.52	-0.0023	0.0037	0.5304	0.0278	0.0231	0.2287	0.00166851	0.00562418
rs569975937	LDL	19	16404594	T	C	-0.1237	0.048	2.00158	0.13	0.13	0.33	na	na	na	0.6583	0.6661	0.323	0.000923049	0.00537462
rs35365035	TC	19	17252151	C	T	-0.009	0.0012	13.1951	-0.0033	0.0066	0.62	0.003	0.0038	0.4234	-0.0143	0.0242	0.5564	9.27862e-06	0.00830733
rs7260450	nonHDL	19	17462094	T	G	-0.0104	0.0016	10.0952	-0.0056	0.0067	0.41	-0.0014	0.004	0.737	-0.0206	0.0242	0.3951	0.00678051	0.746858
rs11668883	LDL	19	17527370	G	A	-0.012	0.0016	13.1951	-0.03	0.0083	0.00029	-0.0081	0.0046	0.07866	0.0153	0.03	0.6095	0.00556973	0.824162
rs4808765	nonHDL	19	18334443	T	C	-0.0145	0.0017	16.8324	-0.0037	0.0071	0.6	0.0159	0.0043	0.000181	-0.0199	0.0253	0.4318	0.61493	0.00538961
rs4808766	LDL	19	18335715	C	G	-0.0137	0.0015	19.1777	-0.005	0.0073	0.5	0.0193	0.0045	2.043e-05	-0.0352	0.0259	0.1739	0.629846	0.0054246
rs11086110	TC	19	18520231	G	A	-0.0132	0.0015	17.8639	0.0072	0.008	0.37	-0.0004	0.0048	0.9367	0.0659	0.0294	0.02476	5.43316e-14	0.00824842
rs1966500	logTG	19	18735666	T	C	-0.0121	0.0013	19.8839	-0.014	0.0065	0.035	0	0.0039	0.999	-0.0367	0.0232	0.1137	6.50267e-09	0.0239056
rs58542926	LDL	19	19379549	C	T	-0.1033	0.0024	404.016	0.092	0.012	2e-14	-0.0331	0.0072	4.02e-06	0.3715	0.0448	1.052e-16	0.985098	0.993891
rs58542926	logTG	19	19379549	C	T	-0.1087	0.0024	447.196	0.092	0.012	2e-14	-0.0331	0.0072	4.02e-06	0.3715	0.0448	1.052e-16	0.985098	0.993891
rs58542926	nonHDL	19	19379549	C	T	-0.1348	0.0029	470.944	0.092	0.012	2e-14	-0.0331	0.0072	4.02e-06	0.3715	0.0448	1.052e-16	0.985098	0.993891
rs58542926	TC	19	19379549	C	T	-0.1239	0.0024	580.539	0.092	0.012	2e-14	-0.0331	0.0072	4.02e-06	0.3715	0.0448	1.052e-16	0.985098	0.993891
rs55737395	nonHDL	19	33751349	G	A	-0.0117	0.0017	11.2301	-0.0043	0.0069	0.54	0.0013	0.0044	0.7707	-0.0364	0.0246	0.1394	0.00259781	0.0145752
rs59048871	TC	19	33803443	A	C	-0.0144	0.0018	14.9051	0.037	0.0094	7.4e-05	-0.0029	0.0056	0.5993	-0.0474	0.0341	0.1653	0.00065523	0.00317344
rs147791730	LDL	19	33864260	G	A	-0.0292	0.004	12.541	0.028	0.019	0.14	0.0081	0.0117	0.4913	-0.1026	0.0689	0.1367	0.000697136	0.00122063
rs10422861	logTG	19	33894846	C	T	-0.014	0.0013	26.3179	-0.034	0.0067	6.3e-07	-0.0207	0.0039	1.25e-07	-0.0537	0.0242	0.02664	0.99589	0.937025
rs58895965	logTG	19	35551428	A	C	-0.0242	0.0018	40.479	0.0031	0.0086	0.72	-0.0008	0.0056	0.885	0.0222	0.0316	0.4818	0.00205663	0.00673534
rs1688040	TC	19	35553830	C	G	-0.0158	0.0021	13.2741	0.014	0.013	0.26	-0.0002	0.0064	0.9782	-0.024	0.0465	0.6058	0.00214182	0.0165761
rs28659908	nonHDL	19	35693120	T	C	-0.0116	0.0016	12.3801	-0.0013	0.0066	0.84	-0.0049	0.004	0.2242	-0.0325	0.0247	0.1874	0.00253029	0.00627638
rs7599	LDL	19	36038390	A	G	-0.0092	0.0013	11.8315	0.0082	0.0066	0.22	-0.0072	0.0038	0.06064	-0.028	0.0238	0.2408	0.00957746	0.0105066
rs7254248	LDL	19	38444695	A	G	-0.0084	0.0013	9.98446	0.0075	0.0065	0.25	0.0161	0.004	5.282e-05	0.0017	0.0235	0.9417	0.352309	0.0103786
rs7254248	TC	19	38444695	A	G	-0.0095	0.0013	12.5658	0.0075	0.0065	0.25	0.0161	0.004	5.282e-05	0.0017	0.0235	0.9417	0.597716	0.0140495
rs56113850	LDL	19	41353107	C	T	-0.0129	0.0014	19.504	-0.011	0.0065	0.11	-0.0035	0.0042	0.4098	-0.0304	0.0243	0.2106	0.00248793	0.0148308
rs56113850	nonHDL	19	41353107	C	T	-0.0139	0.0016	17.4312	-0.011	0.0065	0.11	-0.0035	0.0042	0.4098	-0.0304	0.0243	0.2106	0.00233761	0.014861
rs35538872	logTG	19	41754430	G	A	-0.0897	0.0092	21.7341	-0.0058	0.041	0.89	-0.1032	0.0443	0.01988	0.1646	0.1461	0.2599	1.0404e-18	0.0242386
rs35538872	TC	19	41754430	G	A	-0.0729	0.0089	15.5866	-0.0058	0.041	0.89	-0.1032	0.0443	0.01988	0.1646	0.1461	0.2599	7.46617e-10	0.0237474
rs187519591	nonHDL	19	41969706	G	A	-0.0904	0.0118	13.7341	-0.025	0.046	0.58	na	na	na	0.1215	0.1698	0.4741	0.976276	0.0283868
rs201596848	nonHDL	19	42584958	C	T	-0.1342	0.0246	7.31074	0.13	0.16	0.41	0.0647	0.0647	0.3177	0.9875	1.0426	0.3435	0.0295974	0.0501055
rs562494568	LDL	19	42649075	T	C	-0.4972	0.0525	20.5551	0.3	0.15	0.047	na	na	na	-0.1041	1.1335	0.9269	0.0202213	0.0750495
rs562494568	TC	19	42649075	T	C	-0.3694	0.0507	12.4958	0.3	0.15	0.047	na	na	na	-0.1041	1.1335	0.9269	0.0113603	0.0248001
rs538657595	LDL	19	43234281	G	A	-0.5065	0.0515	22.0991	0.2	0.15	0.18	na	na	na	-1.2392	3.4596	0.7202	0.00090202	0.0825997
rs572546175	LDL	19	43829420	A	C	-0.1024	0.02	6.51494	0.12	0.17	0.48	0.0217	0.0634	0.7323	na	na	na	0.0146522	0.0497487
rs62116988	nonHDL	19	44296689	G	A	-0.0466	0.005	19.9343	-0.021	0.019	0.28	-0.0245	0.0141	0.08215	0.0419	0.0739	0.5702	0.0205778	0.0227668
rs62116988	TC	19	44296689	G	A	-0.0366	0.0042	17.5337	-0.021	0.019	0.28	-0.0245	0.0141	0.08215	0.0419	0.0739	0.5702	0.0208054	0.0233024
rs558152372	logTG	19	44356388	T	A	-0.2996	0.0468	9.81348	na	na	na	na	na	na	na	na	na	0.00133697	0.0343554
rs76989105	LDL	19	44388711	G	C	-0.0755	0.0064	31.3925	0.056	0.029	0.054	-0.0605	0.0335	0.07089	0.0536	0.1111	0.6298	0.122616	0.018913
rs141226346	logTG	19	44890969	C	G	-0.211	0.0186	29.1004	0.037	0.071	0.61	na	na	na	-0.226	0.4166	0.5875	0.0333208	0.0255461
rs7412	LDL	19	45412079	C	T	-0.5174	0.0024	10094.6	0.0074	0.012	0.55	-0.1086	0.0072	9.937e-52	0.0085	0.042	0.8395	1	3.57748e-14
rs7412	nonHDL	19	45412079	C	T	-0.448	0.0029	5184.49	0.0074	0.012	0.55	-0.1086	0.0072	9.937e-52	0.0085	0.042	0.8395	1	3.57748e-14
rs7412	TC	19	45412079	C	T	-0.344	0.0023	4859.8	0.0074	0.012	0.55	-0.1086	0.0072	9.937e-52	0.0085	0.042	0.8395	1	3.57748e-14
rs483082	logTG	19	45416178	T	G	-0.0886	0.0015	759.468	0.057	0.0077	2.1e-13	0.0051	0.0046	0.2647	0.1035	0.0276	0.0001771	2.36354e-47	0.0129307
rs7255743	nonHDL	19	46018119	G	A	-0.1462	0.0066	107.996	-0.0054	0.026	0.84	-0.0582	0.0165	0.0004314	0.0562	0.0937	0.549	0.726906	3.21977e-05
rs7255743	TC	19	46018119	G	A	-0.1141	0.0053	102.073	-0.0054	0.026	0.84	-0.0582	0.0165	0.0004314	0.0562	0.0937	0.549	0.726906	3.21977e-05
rs62136101	nonHDL	19	46854055	C	T	-0.0139	0.0017	15.5342	-0.0042	0.0069	0.55	0.0012	0.0044	0.7809	0.0124	0.025	0.6209	0.00167984	0.00581834
rs4803937	logTG	19	46887199	A	G	-0.0124	0.0014	18.0857	-0.0032	0.007	0.65	0.001	0.0044	0.8205	0.0102	0.0249	0.6828	0.00167556	0.00583161
rs3764613	TC	19	46896217	A	G	-0.013	0.0012	26.6211	-0.0022	0.0064	0.73	-0.0012	0.0037	0.7526	0.0052	0.0233	0.8217	0.00152584	0.00483553
rs537848612	LDL	19	47220338	TCGG	T	-0.0165	0.0024	11.2077	na	na	na	na	na	na	na	na	na	0.959336	0.131944
rs62136856	logTG	19	47573527	G	A	-0.0114	0.0014	15.4133	-0.045	0.007	1.1e-10	-0.0066	0.0043	0.1287	-0.0101	0.0251	0.6888	0.0057442	0.972503
rs12461923	nonHDL	19	47601215	T	C	-0.0145	0.0021	11.2985	-0.018	0.0088	0.043	-0.0143	0.0056	0.01098	0.0704	0.035	0.04399	0.0515398	0.025145
rs62129968	logTG	19	48383542	C	A	-0.0166	0.0018	19.5361	0.0049	0.0087	0.57	-0.0068	0.0056	0.2253	0.0125	0.0312	0.6882	0.00464046	0.00749374
rs681343	LDL	19	49206462	T	C	-0.029	0.0013	109.507	0.012	0.0064	0.058	-0.0096	0.004	0.01577	0.02	0.023	0.3838	0.0291785	0.0266826
rs681343	nonHDL	19	49206462	T	C	-0.0328	0.0016	92.667	0.012	0.0064	0.058	-0.0096	0.004	0.01577	0.02	0.023	0.3838	0.0291267	0.0264351
rs11878908	TC	19	49227443	T	C	-0.029	0.0013	109.507	-0.0028	0.0064	0.66	-0.0069	0.004	0.08422	0.0078	0.023	0.735	0.0128605	0.00491288
rs838133	logTG	19	49259529	A	G	-0.0195	0.0014	43.3718	0.0004	0.0066	0.95	-0.0041	0.0044	0.344	-0.0118	0.0233	0.6139	0.00257279	0.00460624
rs142385484	LDL	19	50016759	C	T	-0.0193	0.0019	23.5148	-0.037	0.0091	3.5e-05	-0.0146	0.0059	0.01306	-0.054	0.0333	0.1047	0.0417022	0.968038
rs142385484	nonHDL	19	50016759	C	T	-0.0247	0.0022	28.5235	-0.037	0.0091	3.5e-05	-0.0146	0.0059	0.01306	-0.054	0.0333	0.1047	0.041705	0.968039
rs142385484	TC	19	50016759	C	T	-0.0263	0.0018	47.6223	-0.037	0.0091	3.5e-05	-0.0146	0.0059	0.01306	-0.054	0.0333	0.1047	0.0417023	0.968037
rs113886122	logTG	19	50044741	G	C	-0.0189	0.0018	25.0636	-0.0073	0.009	0.42	-0.0179	0.0056	0.001471	-0.0629	0.0313	0.04423	0.0564577	0.0978614
rs384116	logTG	19	54796719	C	G	-0.012	0.0015	14.9051	-0.0044	0.0076	0.57	-0.0063	0.0047	0.1733	0.0097	0.029	0.7385	0.00266833	0.00606274
rs103294	TC	19	54797848	T	C	-0.0172	0.0015	29.7122	0.0038	0.0079	0.63	0.0044	0.0046	0.3423	-0.0002	0.0284	0.9957	0.00250772	0.00611994
rs7251733	logTG	19	56099951	A	G	-0.0209	0.0017	34.0114	-0.0085	0.0088	0.33	-0.013	0.0052	0.0133	0.016	0.0311	0.6072	0.0386916	0.009881
rs12610709	nonHDL	19	56102362	A	G	-0.0156	0.0021	12.9595	-0.0094	0.0088	0.28	-0.0127	0.0052	0.01384	0.016	0.031	0.6063	0.0387645	0.0100428
rs10406304	nonHDL	19	57010947	T	G	-0.0145	0.0017	16.8324	-0.016	0.0075	0.039	0.0074	0.0043	0.08802	0.0073	0.0258	0.7777	0.00668855	0.092778
rs10406304	TC	19	57010947	T	G	-0.0118	0.0014	16.456	-0.016	0.0075	0.039	0.0074	0.0043	0.08802	0.0073	0.0258	0.7777	0.00771868	0.063537
rs1029709	LDL	19	57046007	T	C	-0.0128	0.0014	19.2159	-0.018	0.007	0.009	0.0076	0.0042	0.07083	0.0109	0.0257	0.6709	0.00830398	0.109421
rs8102873	logTG	19	57488423	T	C	-0.0095	0.0013	12.5658	-0.008	0.0064	0.21	-0.0045	0.0037	0.2288	-0.02	0.0236	0.3958	0.00287478	0.00887319
rs181976063	LDL	19	57969606	T	C	-0.0577	0.0077	13.1736	0.021	0.037	0.57	-0.0034	0.0249	0.8928	0.043	0.1448	0.7664	0.00920138	0.0269375
rs181976063	TC	19	57969606	T	C	-0.0558	0.0074	13.3297	0.021	0.037	0.57	-0.0034	0.0249	0.8928	0.043	0.1448	0.7664	0.00927074	0.0277985
rs35081008	LDL	19	58662235	C	T	-0.0302	0.0019	56.1617	0.012	0.0088	0.16	-0.0016	0.0058	0.7848	0.0292	0.0321	0.3628	0.00250725	0.0154412
rs35081008	nonHDL	19	58662235	C	T	-0.0326	0.0022	48.9517	0.012	0.0088	0.16	-0.0016	0.0058	0.7848	0.0292	0.0321	0.3628	0.00238902	0.0170118
rs34003091	TC	19	58662254	T	C	-0.028	0.0018	53.836	0.012	0.0087	0.15	-0.0015	0.0058	0.7903	0.0292	0.0321	0.3633	0.00239442	0.0171763
rs959093	nonHDL	20	399761	A	G	-0.0141	0.0019	12.9348	0.019	0.0084	0.02	-0.0053	0.005	0.2877	0.0591	0.0311	0.05705	0.00322671	0.0481369
rs2057251	TC	20	402710	G	A	-0.009	0.0013	11.3546	0.011	0.0071	0.12	-0.0078	0.0041	0.05369	0.0396	0.0267	0.1384	0.00705767	0.0189924
rs151235402	logTG	20	569164	T	C	-0.0468	0.0054	17.3517	-0.07	0.025	0.0043	-0.03	0.0189	0.1131	0.0877	0.1044	0.4009	0.0223243	0.433821
rs73078112	LDL	20	5547384	T	C	-0.0472	0.0046	23.9757	0.02	0.02	0.31	-0.0427	0.0167	0.01079	0.135	0.0769	0.07918	0.108713	0.022804
rs73078112	TC	20	5547384	T	C	-0.0442	0.0044	23.0168	0.02	0.02	0.31	-0.0427	0.0167	0.01079	0.135	0.0769	0.07918	0.0086897	0.0462424
rs3950106	nonHDL	20	5572957	C	T	-0.037	0.0038	21.6778	0.021	0.017	0.23	-0.0233	0.0097	0.0157	0.1357	0.0694	0.05056	0.00514345	0.0484718
rs1321940	LDL	20	12959885	G	A	-0.0134	0.0013	24.1868	0.014	0.0065	0.036	-0.0054	0.0039	0.1587	0.0798	0.024	0.0009053	0.00409617	0.0417345
rs1321940	TC	20	12959885	G	A	-0.0133	0.0012	27.8206	0.014	0.0065	0.036	-0.0054	0.0039	0.1587	0.0798	0.024	0.0009053	0.00415316	0.0409646
rs168622	nonHDL	20	12966089	G	T	-0.0127	0.0015	16.5977	0.014	0.0064	0.035	-0.0055	0.0038	0.1489	0.0755	0.0237	0.001418	0.00410957	0.0408624
rs2618566	LDL	20	17844684	G	T	-0.0375	0.0014	157.324	0.011	0.0067	0.11	-0.0142	0.004	0.0003787	-0.0506	0.0246	0.04007	0.454119	0.0169223
rs2618566	nonHDL	20	17844684	G	T	-0.0328	0.0016	92.667	0.011	0.0067	0.11	-0.0142	0.004	0.0003787	-0.0506	0.0246	0.04007	0.453795	0.0169238
rs2618566	TC	20	17844684	G	T	-0.0291	0.0013	110.255	0.011	0.0067	0.11	-0.0142	0.004	0.0003787	-0.0506	0.0246	0.04007	0.454516	0.0169224
rs8115257	LDL	20	25207931	G	A	-0.0094	0.0013	12.3185	0.0041	0.0063	0.52	-0.011	0.004	0.005703	-0.0016	0.023	0.9435	0.115577	0.0055275
rs8115257	TC	20	25207931	G	A	-0.0085	0.0012	11.8516	0.0041	0.0063	0.52	-0.011	0.004	0.005703	-0.0016	0.023	0.9435	0.118787	0.00545476
rs2261795	nonHDL	20	25263136	C	T	-0.0106	0.0016	10.4594	0.0027	0.0064	0.68	-0.0152	0.004	0.0001192	-0.0071	0.0231	0.7593	0.368734	0.00539114
rs116948922	logTG	20	25534854	C	T	-0.0263	0.0042	9.41987	-0.045	0.019	0.019	-0.02	0.0142	0.1583	-0.0962	0.0715	0.1784	0.00965294	0.16292
rs6120879	logTG	20	30202961	T	C	-0.0123	0.0017	12.333	-0.018	0.0086	0.034	-0.0066	0.0052	0.2015	-0.0148	0.0309	0.6332	0.00473556	0.0546251
rs2424895	TC	20	31335978	C	T	-0.0101	0.0013	14.1026	-0.012	0.0064	0.056	-0.005	0.0043	0.2388	0.0141	0.0233	0.5441	0.00411906	0.0229424
rs67611724	logTG	20	32308275	T	C	-0.0158	0.0019	16.0403	-0.046	0.009	2.7e-07	-0.0158	0.0061	0.009253	-0.0997	0.0325	0.002136	0.0194586	0.95926
rs12481365	logTG	20	34131396	C	T	-0.0169	0.0017	22.5598	0.013	0.0093	0.16	-0.0017	0.0051	0.7428	0.0054	0.0325	0.8681	0.00014366	0.0166886
rs45563939	nonHDL	20	34136791	C	T	-0.0312	0.0021	49.2039	0.013	0.0093	0.16	-0.0009	0.0051	0.8634	0.0071	0.0325	0.8258	0.000158129	0.0161435
rs7261820	LDL	20	34160840	G	A	-0.0283	0.0018	54.9726	0.013	0.0093	0.15	-0.0015	0.0051	0.7646	0.0075	0.0325	0.8183	7.06006e-05	0.0159622
rs7261820	TC	20	34160840	G	A	-0.0336	0.0017	86.2222	0.013	0.0093	0.15	-0.0015	0.0051	0.7646	0.0075	0.0325	0.8183	6.58698e-05	0.0152593
rs4810280	logTG	20	38620281	C	T	-0.009	0.0015	8.70483	-0.018	0.0076	0.021	-0.0015	0.0044	0.7258	-0.078	0.027	0.003855	0.0151196	0.0366086
rs146472249	nonHDL	20	38624741	G	A	-0.0702	0.0112	9.43646	-0.051	0.045	0.26	-0.0407	0.0287	0.156	-0.1483	0.1954	0.4477	0.0238236	0.0374897
rs1883711	LDL	20	39179822	C	G	-0.1302	0.0041	220.582	-0.017	0.018	0.35	-0.0879	0.0147	2.3e-09	-0.0138	0.0738	0.8521	0.993505	0.0189269
rs1883711	logTG	20	39179822	C	G	-0.0594	0.0041	46.8396	-0.017	0.018	0.35	-0.0879	0.0147	2.3e-09	-0.0138	0.0738	0.8521	0.993864	0.0188706
rs1883711	nonHDL	20	39179822	C	G	-0.1355	0.0046	189.984	-0.017	0.018	0.35	-0.0879	0.0147	2.3e-09	-0.0138	0.0738	0.8521	0.993505	0.0189237
rs1883711	TC	20	39179822	C	G	-0.1244	0.004	211.618	-0.017	0.018	0.35	-0.0879	0.0147	2.3e-09	-0.0138	0.0738	0.8521	0.993505	0.0189216
rs6029549	LDL	20	39754695	G	C	-0.0297	0.0013	114.797	-0.021	0.0064	0.00089	-0.0167	0.0039	1.563e-05	-0.0241	0.023	0.296	0.0790889	0.528554
rs6029549	nonHDL	20	39754695	G	C	-0.031	0.0015	94.1603	-0.021	0.0064	0.00089	-0.0167	0.0039	1.563e-05	-0.0241	0.023	0.296	0.0769408	0.517396
rs6029552	TC	20	39760448	G	C	-0.0312	0.0012	148.305	-0.021	0.0064	0.00089	-0.0169	0.0039	1.194e-05	-0.0246	0.023	0.2852	0.0213993	0.526651
rs6102309	logTG	20	39856080	C	A	-0.0143	0.0014	23.7667	-0.014	0.0069	0.038	-0.0249	0.004	7.115e-10	-0.0242	0.0249	0.3307	0.97857	0.0303819
rs285186	logTG	20	42315091	A	G	-0.0135	0.0019	11.9205	-0.04	0.01	7.1e-05	-0.0141	0.0057	0.01338	-0.0358	0.037	0.3336	0.0441466	0.274938
rs736821	logTG	20	43034079	G	A	-0.0116	0.0018	9.93545	-0.019	0.0093	0.042	-0.0034	0.0054	0.5244	-0.0152	0.0331	0.645	0.00639398	0.00314964
rs1800961	LDL	20	43042364	C	T	-0.0531	0.0036	48.5119	0.16	0.017	3.2e-20	0.0103	0.0116	0.3751	-0.0221	0.0671	0.7419	0.00638503	1
rs1800961	nonHDL	20	43042364	C	T	-0.0527	0.0042	35.3876	0.16	0.017	3.2e-20	0.0103	0.0116	0.3751	-0.0221	0.0671	0.7419	0.00638503	1
rs1800961	TC	20	43042364	C	T	-0.084	0.0035	126.556	0.16	0.017	3.2e-20	0.0103	0.0116	0.3751	-0.0221	0.0671	0.7419	0.00638503	1
rs2267867	nonHDL	20	43965903	A	G	-0.013	0.0017	13.6869	0.0004	0.0075	0.96	0.002	0.0044	0.6472	-0.0095	0.0272	0.726	0.00185105	0.00550212
rs6073958	logTG	20	44551855	C	T	-0.0474	0.0015	218.433	0.014	0.008	0.083	0.0197	0.0047	2.598e-05	0.0099	0.0284	0.7272	5.67342e-09	0.0249224
rs6073958	nonHDL	20	44551855	C	T	-0.0226	0.0018	35.4311	0.014	0.008	0.083	0.0197	0.0047	2.598e-05	0.0099	0.0284	0.7272	5.65562e-09	0.0250152
rs2903809	LDL	20	44552895	C	A	-0.0106	0.0014	13.4328	0.011	0.0072	0.14	0.0253	0.0041	5.328e-10	-0.0159	0.0259	0.5409	0.0063292	0.0164565
rs367701385	TC	20	44736371	T	TA	-0.0132	0.0015	17.8639	na	na	na	-0.0017	0.0054	0.7535	na	na	na	0.00140509	0.00783071
rs6066138	logTG	20	45594711	G	A	-0.0178	0.0015	31.7536	-0.047	0.0071	7e-11	-0.0076	0.0046	0.09388	-0.0257	0.0257	0.3161	0.00541682	0.987169
rs6019535	TC	20	47541517	A	G	-0.0117	0.0013	18.6464	0.012	0.0068	0.087	0.0114	0.0042	0.006587	0.036	0.0246	0.1438	1.39248e-05	0.0228027
rs2295027	LDL	20	47582884	A	G	-0.0113	0.0014	15.1581	0.012	0.0068	0.077	0.0101	0.0041	0.01439	0.0353	0.0246	0.1505	4.53472e-05	0.0225139
rs1885163	nonHDL	20	47701765	C	T	-0.013	0.0016	15.3493	0.011	0.0069	0.11	0.0095	0.0041	0.02023	0.0376	0.0249	0.1305	0.0234068	0.0184288
rs4811348	logTG	20	51033910	T	G	-0.0104	0.0013	14.9051	-0.033	0.0066	5e-07	-0.0129	0.0038	0.0007473	-0.0434	0.0239	0.06945	0.129534	0.808464
rs6022849	nonHDL	20	52532637	C	G	-0.0122	0.0016	13.6125	0.012	0.0061	0.057	-0.0087	0.0038	0.0213	0.0157	0.025	0.5314	0.0359425	0.0310535
rs62206651	TC	20	52535287	C	T	-0.012	0.0012	22.817	0.012	0.0063	0.056	-0.0103	0.0037	0.00598	0.023	0.0249	0.3556	0.0357131	0.0291546
rs6022850	LDL	20	52535400	T	C	-0.0102	0.0013	14.3676	0.014	0.0068	0.047	-0.0102	0.0037	0.006238	0.0232	0.0249	0.3508	0.0496928	0.0312416
rs8119374	logTG	20	56118666	C	T	-0.0131	0.0012	27.0179	0.0029	0.0064	0.65	-0.0057	0.0037	0.1232	-0.0004	0.0236	0.9851	0.113302	0.0416387
rs3746778	LDL	20	61341472	G	A	-0.013	0.0015	17.3517	-0.0068	0.0069	0.33	-0.0104	0.0046	0.02497	0.0425	0.0251	0.09028	0.0198491	0.00538952
rs3746778	nonHDL	20	61341472	G	A	-0.0119	0.0017	11.5918	-0.0068	0.0069	0.33	-0.0104	0.0046	0.02497	0.0425	0.0251	0.09028	0.0198486	0.00538969
rs3746778	TC	20	61341472	G	A	-0.0095	0.0015	9.61993	-0.0068	0.0069	0.33	-0.0104	0.0046	0.02497	0.0425	0.0251	0.09028	0.0201736	0.00540601
rs8126001	logTG	20	62711459	C	T	-0.0158	0.0013	33.2618	-0.028	0.0067	3.7e-05	-0.0252	0.0038	3.271e-11	-0.0078	0.0234	0.7384	0.998405	0.923271
rs8126001	TC	20	62711459	C	T	-0.0129	0.0013	22.4809	-0.028	0.0067	3.7e-05	-0.0252	0.0038	3.271e-11	-0.0078	0.0234	0.7384	0.997294	0.915765
rs8121509	LDL	20	62712053	T	C	-0.0136	0.0013	24.887	-0.027	0.0066	5.8e-05	-0.0241	0.0038	1.563e-10	-0.0123	0.0235	0.6004	0.980325	0.93183
rs8121509	nonHDL	20	62712053	T	C	-0.0179	0.0016	28.3284	-0.027	0.0066	5.8e-05	-0.0241	0.0038	1.563e-10	-0.0123	0.0235	0.6004	0.989151	0.889742
rs12106385	LDL	21	16586682	T	A	-0.0255	0.0041	9.30216	-0.046	0.024	0.057	-0.0313	0.0126	0.01312	0.0457	0.0905	0.6136	0.000741079	0.0761709
rs12106385	nonHDL	21	16586682	T	A	-0.0344	0.0052	10.4311	-0.046	0.024	0.057	-0.0313	0.0126	0.01312	0.0457	0.0905	0.6136	0.102204	0.0867232
rs73201533	LDL	21	33089703	C	A	-0.0311	0.0032	21.6006	-0.012	0.015	0.42	-0.0213	0.0105	0.04277	0.0296	0.0555	0.5942	0.0313014	0.01571
rs113390731	TC	21	33112255	T	G	-0.0255	0.0028	19.0727	-0.014	0.015	0.35	-0.0099	0.0092	0.2808	0.0204	0.0551	0.7107	0.0296954	0.0169741
rs73201561	nonHDL	21	33119592	C	G	-0.027	0.0037	12.5322	-0.017	0.015	0.26	-0.0187	0.0102	0.06613	0.0213	0.0566	0.7071	0.0272056	0.0158147
rs4817999	LDL	21	40554355	A	C	-0.0147	0.0013	28.9201	-0.016	0.0064	0.015	-0.0035	0.0038	0.3565	0.0427	0.0234	0.0681	0.00235484	0.0882495
rs4818017	nonHDL	21	40690561	T	G	-0.0154	0.0015	24.0018	-0.014	0.0064	0.032	-0.0022	0.0037	0.5561	0.0283	0.0234	0.2265	0.00163377	0.0516164
rs397751852	TC	21	40709617	AT	A	-0.0157	0.0013	32.8543	na	na	na	na	na	na	na	na	na	0.00169227	0.0771562
rs1474490	logTG	21	40716136	A	C	-0.0115	0.0013	18.0429	-0.02	0.0064	0.0019	0.0059	0.0037	0.1155	0.0069	0.0233	0.7682	0.00430344	0.359614
rs960230	logTG	21	42622479	G	A	-0.0113	0.0016	11.7864	-0.016	0.0077	0.038	-0.0157	0.0053	0.003204	0.004	0.0283	0.888	0.186749	0.035635
rs114139997	logTG	21	46875775	G	A	-0.2566	0.0171	50.1725	na	na	na	-0.0944	0.0476	0.04738	-0.8987	1.8213	0.6217	0.0516912	0.073764
rs2236459	TC	21	46897079	A	G	-0.0103	0.0013	14.6351	0.0035	0.0071	0.62	-0.0004	0.004	0.9129	0.0058	0.025	0.8151	0.00135501	0.00533144
rs141350130	logTG	21	47401057	T	C	-0.1638	0.0234	11.5918	na	na	na	na	na	na	2.025	2.9296	0.4894	0.0243432	0.00841687
rs35665085	logTG	22	17625915	A	G	-0.0232	0.003	13.9798	-0.0055	0.014	0.7	-0.0098	0.0096	0.3071	-0.0531	0.0497	0.2858	0.00621728	0.0104518
rs35665085	TC	22	17625915	A	G	-0.0188	0.0029	10.0455	-0.0055	0.014	0.7	-0.0098	0.0096	0.3071	-0.0531	0.0497	0.2858	0.00620874	0.0104367
rs11703382	LDL	22	18481857	T	C	-0.0123	0.0015	15.6191	0.031	0.0074	3.5e-05	-0.0148	0.0046	0.001321	0.0185	0.027	0.4926	0.12543	0.87236
rs11703382	TC	22	18481857	T	C	-0.0116	0.0014	15.9303	0.031	0.0074	3.5e-05	-0.0148	0.0046	0.001321	0.0185	0.027	0.4926	0.229903	0.662169
rs165722	LDL	22	19949013	T	C	-0.0087	0.0013	10.6582	-0.016	0.0064	0.015	-0.0106	0.0037	0.004779	-0.0083	0.023	0.7203	0.0299003	0.0718454
rs4633	nonHDL	22	19950235	T	C	-0.0099	0.0015	10.386	-0.015	0.0064	0.018	-0.0095	0.0037	0.01083	-0.0063	0.0229	0.7833	0.00597127	0.0718428
rs5754102	LDL	22	21916272	C	A	-0.0143	0.0018	14.7098	na	na	na	-0.0088	0.0058	0.1293	na	na	na	0.00671851	0.123023
rs59391722	TC	22	21920817	G	C	-0.0244	0.0015	58.7691	0.02	0.0081	0.011	-0.0081	0.0047	0.08609	-0.0125	0.0309	0.687	0.00921114	0.124997
rs140490	nonHDL	22	21921686	G	T	-0.013	0.0018	12.2912	0.017	0.0085	0.05	-0.0083	0.0043	0.05389	-0.0042	0.0306	0.8899	0.0107531	0.125638
rs5754217	logTG	22	21939675	G	T	-0.0089	0.0015	8.52747	0.021	0.008	0.008	-0.0085	0.0042	0.04498	-0.0027	0.0288	0.9257	0.0104526	0.104656
rs4822458	logTG	22	24265659	C	T	-0.0107	0.0013	15.7305	0.0003	0.0064	0.96	-0.0136	0.0039	0.0004607	-0.073	0.0234	0.001777	0.429094	0.00478574
rs738722	logTG	22	29130012	C	T	-0.0114	0.0014	15.4133	-0.025	0.007	0.00046	-0.0092	0.0041	0.02489	-0.0527	0.0254	0.0377	0.0257811	0.499727
rs1033667	nonHDL	22	29130300	C	T	-0.0099	0.0017	8.23944	-0.025	0.007	0.00035	-0.0085	0.0042	0.0405	-0.0541	0.0256	0.03484	0.0236148	0.466634
rs468902	logTG	22	29963508	C	T	-0.0115	0.0013	18.0429	0.0044	0.0063	0.49	-0.0028	0.0038	0.4577	0.0147	0.0231	0.5226	0.00176749	0.00246151
rs12160851	nonHDL	22	30151700	G	A	-0.0248	0.0033	13.2453	-0.011	0.017	0.54	-0.0067	0.0076	0.3785	0.0851	0.0581	0.1429	0.00764548	4.53931e-09
rs5763794	TC	22	30529960	G	T	-0.0266	0.0026	23.8405	0.0086	0.022	0.69	-0.0101	0.0076	0.1858	0.0847	0.072	0.2389	0.0418078	7.09192e-10
rs13054837	LDL	22	30575749	C	T	-0.0261	0.0028	19.9401	0.011	0.022	0.62	-0.01	0.0077	0.1956	0.1053	0.0724	0.146	2.1089e-08	8.42849e-10
rs4820946	LDL	22	31551160	C	T	-0.0101	0.0015	10.7804	0.011	0.0074	0.13	0.0026	0.0044	0.5581	0.0224	0.0268	0.4038	0.00193301	0.0175052
rs5755688	LDL	22	35685048	A	G	-0.0127	0.0013	21.8164	-0.019	0.0066	0.0051	0.0006	0.0039	0.8854	-0.027	0.0246	0.2723	0.0015023	0.179282
rs2272791	nonHDL	22	35689415	G	T	-0.0143	0.0016	18.4	-0.018	0.0068	0.0072	0.0008	0.0039	0.8426	-0.0306	0.0255	0.2292	0.00150081	0.179184
rs3788509	TC	22	35707236	A	G	-0.014	0.0012	30.7243	-0.016	0.0066	0.014	0.0012	0.0039	0.7603	-0.0232	0.0244	0.3424	0.00150478	0.172972
rs9610329	logTG	22	36042986	T	C	-0.0126	0.0014	18.6464	-0.011	0.0065	0.087	-0.0206	0.0042	7.273e-07	-0.0002	0.0242	0.9925	0.996329	0.0197003
rs147428040	nonHDL	22	36425023	A	G	-0.0256	0.0042	8.96148	0.0038	0.017	0.83	0.0049	0.0104	0.6396	-0.0301	0.0646	0.641	0.00374054	0.0118136
rs132644	LDL	22	36545826	T	C	-0.0124	0.0017	12.522	-0.0022	0.0084	0.79	-0.0117	0.0051	0.02108	0.0364	0.0301	0.2268	0.0345291	0.00621181
rs132644	TC	22	36545826	T	C	-0.0126	0.0016	14.4676	-0.0022	0.0084	0.79	-0.0117	0.0051	0.02108	0.0364	0.0301	0.2268	0.0240461	0.00619202
rs855791	LDL	22	37462936	A	G	-0.0087	0.0013	10.6582	0.0021	0.0065	0.75	-0.0185	0.0038	1.08e-06	-0.065	0.0231	0.004831	0.907765	0.0105879
rs6001029	nonHDL	22	38555193	C	A	-0.0097	0.0015	9.99918	-0.027	0.0066	4e-05	-0.0017	0.0038	0.6575	-0.0145	0.024	0.545	0.00174932	0.907881
rs4820325	logTG	22	38599978	A	G	-0.0205	0.0013	55.2953	-0.03	0.0064	4.3e-06	-0.0034	0.0038	0.362	-0.0127	0.0233	0.585	0.00182227	0.94638
rs138711	logTG	22	39139913	T	C	-0.0156	0.0013	32.4494	0.0049	0.0066	0.46	0.0193	0.0039	1.043e-06	-0.0228	0.024	0.3437	0.982199	0.00610305
rs138293	nonHDL	22	41181336	G	A	-0.0131	0.0016	15.574	-0.013	0.0067	0.047	0.0057	0.0039	0.1397	-0.0167	0.0243	0.4928	0.00309859	0.019309
rs138335	LDL	22	41227086	C	G	-0.0135	0.0014	21.2782	-0.015	0.0065	0.024	0.0045	0.0041	0.2781	-0.0034	0.0245	0.8903	0.00239016	0.0327858
rs138349	TC	22	41249522	A	G	-0.0125	0.0013	21.1621	-0.016	0.0067	0.02	0.0042	0.0041	0.3041	-0.0032	0.0244	0.8964	0.00241904	0.0402914
rs149012039	LDL	22	42538514	T	TC	-0.0029	0.0015	1.27413	na	na	na	na	na	na	na	na	na	0.0111993	0.254926
rs149012039	nonHDL	22	42538514	T	TC	-0.0006	0.0018	0.131425	na	na	na	na	na	na	na	na	na	0.0103792	0.219039
rs5758600	TC	22	42538670	T	G	-0.0296	0.0041	12.2825	-0.44	0.24	0.06	-0.0173	0.0111	0.1185	0.1594	0.5533	0.7733	0.0109287	0.219874
rs738408	logTG	22	44324730	C	T	-0.0147	0.0015	21.9485	0.049	0.0076	1.8e-10	-0.0257	0.0043	2.086e-09	0.3947	0.0285	1.205e-43	0.980624	0.996107
rs738408	TC	22	44324730	C	T	-0.027	0.0014	82.1499	0.049	0.0076	1.8e-10	-0.0257	0.0043	2.086e-09	0.3947	0.0285	1.205e-43	0.987534	0.997712
rs3747207	LDL	22	44324855	G	A	-0.0142	0.0015	20.5392	0.049	0.0076	2.1e-10	-0.026	0.0043	2.132e-09	0.3947	0.0286	2.458e-43	0.987426	0.99764
rs3747207	nonHDL	22	44324855	G	A	-0.0208	0.0017	33.696	0.049	0.0076	2.1e-10	-0.026	0.0043	2.132e-09	0.3947	0.0286	2.458e-43	0.987565	0.99777
rs13268	LDL	22	45996298	A	G	-0.0375	0.0044	16.8073	0.013	0.021	0.53	0.0099	0.0139	0.474	-0.0487	0.0737	0.5087	0.00685251	0.0159904
rs13268	nonHDL	22	45996298	A	G	-0.0378	0.0053	12.005	0.013	0.021	0.53	0.0099	0.0139	0.474	-0.0487	0.0737	0.5087	0.00685249	0.0159951
rs13268	TC	22	45996298	A	G	-0.0299	0.0043	11.4481	0.013	0.021	0.53	0.0099	0.0139	0.474	-0.0487	0.0737	0.5087	0.00685243	0.0159889
rs4253766	TC	22	46623905	T	C	-0.017	0.0019	18.4388	-0.052	0.01	3.5e-07	-0.0249	0.006	3.325e-05	-0.064	0.0365	0.07979	0.601343	0.96749
rs9626823	nonHDL	22	46645148	A	G	-0.019	0.0026	12.5658	-0.053	0.01	2.1e-07	-0.0196	0.0065	0.002429	-0.0555	0.0365	0.128	0.594617	0.967308
rs9615937	logTG	22	46687681	C	G	-0.0243	0.0023	25.3645	-0.049	0.011	8.8e-06	-0.0206	0.0072	0.004411	-0.0484	0.0396	0.2214	0.517505	0.953936
rs146471363	LDL	22	46730338	G	C	-0.0824	0.0112	12.7261	0.0025	0.052	0.96	-0.0569	0.0481	0.2371	-0.0923	0.1688	0.5848	0.0315278	0.0675702
rs140947018	logTG	22	50165082	G	A	-0.0307	0.0041	13.1547	-0.033	0.019	0.086	0.0157	0.0127	0.2165	0.0217	0.0706	0.7582	0.00962623	0.0475434
rs73188911	logTG	22	50746706	C	T	-0.0181	0.0025	12.3481	0.014	0.012	0.25	0.012	0.0075	0.1084	0.0441	0.0428	0.3029	0.00816676	0.08082
rs9616936	TC	22	50837224	G	A	-0.0108	0.0013	16.0106	0.0095	0.0068	0.17	0.0006	0.0039	0.885	-0.0121	0.024	0.6137	0.00154204	0.00533411
rs9616822	LDL	22	50840573	A	G	-0.0109	0.0013	16.2934	0.01	0.0065	0.13	0.0004	0.0039	0.9228	-0.0137	0.0241	0.5703	0.00153505	0.0064994
rs9616822	nonHDL	22	50840573	A	G	-0.0118	0.0016	12.7842	0.01	0.0065	0.13	0.0004	0.0039	0.9228	-0.0137	0.0241	0.5703	0.0015302	0.00668294
rs13303368	HDL	1	914852	C	G	0.0097	0.0014	11.3715	0.0016	0.0073	0.83	-0.0059	0.0051	0.2477	0.024	0.0239	0.316	0.0639846	0.00514745
rs7542410	HDL	1	1831012	T	C	0.0087	0.0013	10.6582	0.0013	0.0063	0.84	0.0157	0.0038	4.392e-05	-0.0592	0.0233	0.01095	0.66087	0.00478503
rs55775305	HDL	1	2975119	G	C	0.0129	0.0018	12.1144	0.0027	0.0086	0.75	0.0273	0.0059	4.242e-06	0.0025	0.0308	0.9352	0.00011344	0.00645076
rs191220001	HDL	1	12518739	A	G	0.0519	0.0093	7.62046	0.046	0.039	0.24	0.0475	0.0478	0.3203	0.0352	0.1788	0.8438	0.026471	0.0417772
rs589942	HDL	1	20916080	G	C	0.0112	0.0014	14.9051	0.017	0.0072	0.019	-0.0104	0.0041	0.01102	-0.0094	0.0243	0.6997	0.0504652	0.0448414
rs1767141	HDL	1	23734350	A	C	0.0222	0.0021	25.3933	-0.0029	0.011	0.79	0.0016	0.0064	0.8075	-0.0475	0.0401	0.2367	0.00258836	0.0081929
rs2361147	HDL	1	25049949	G	A	0.0092	0.0014	10.3025	-0.0088	0.0073	0.23	-0.0109	0.0041	0.007317	0.0016	0.0266	0.953	0.108145	0.00950036
rs75460349	HDL	1	27180088	C	A	0.0856	0.0044	83.574	-0.072	0.022	0.0012	-0.0523	0.0142	0.0002289	-0.0512	0.0786	0.5151	0.828901	0.647584
rs7549174	HDL	1	28319484	G	A	0.0136	0.0013	24.887	0.0076	0.0068	0.27	-0.0012	0.004	0.7614	0.0372	0.0253	0.1403	0.0015619	0.00840573
rs4660446	HDL	1	39438889	C	T	0.0117	0.0014	16.1921	-0.023	0.0068	0.0007	-0.0034	0.0042	0.414	-0.0183	0.025	0.4627	0.00205926	0.591785
rs3768321	HDL	1	40035928	T	G	0.0441	0.0017	147.641	-0.085	0.008	1.3e-26	-0.0156	0.0052	0.002615	-0.0422	0.0289	0.1446	0.112525	0.966747
rs61772595	HDL	1	56983585	A	G	0.0151	0.002	13.3613	-0.021	0.0096	0.029	-0.0487	0.0064	2.139e-14	-0.0671	0.035	0.0556	4.02175e-08	0.0833074
rs3850634	HDL	1	63050598	G	T	0.013	0.0013	22.817	-0.0003	0.0066	0.96	0.0068	0.004	0.08853	-0.0154	0.0243	0.5273	0.00650263	0.00510434
rs1938498	HDL	1	66098653	T	C	0.0108	0.0013	16.0106	-0.015	0.0065	0.024	0.0055	0.0039	0.1562	-0.0093	0.0237	0.6942	0.00436105	0.0424186
rs657262	HDL	1	71428732	A	C	0.0111	0.0013	16.8664	-0.016	0.0065	0.016	-0.0068	0.0038	0.07586	-0.0039	0.0239	0.8714	0.010464	0.358913
rs2613496	HDL	1	72754788	C	T	0.0133	0.0016	16.0282	-0.039	0.0083	1.9e-06	-0.0188	0.0051	0.0002498	0.0101	0.0305	0.7396	0.58497	0.935801
rs11161570	HDL	1	85721911	C	T	0.0076	0.0012	9.61993	-0.0098	0.0063	0.12	-0.0002	0.0037	0.9508	-0.0191	0.023	0.4069	0.00171215	0.0132764
rs12406245	HDL	1	93860625	A	G	0.0257	0.0013	86.2612	-0.0029	0.0066	0.66	0.0025	0.0039	0.5213	-0.016	0.0244	0.5117	0.00188853	0.0053853
rs12740374	HDL	1	109817590	G	T	0.0338	0.0015	111.708	0.023	0.0076	0.0025	-0.0934	0.0046	1.46e-91	-0.0212	0.0276	0.4408	0.999721	0.141186
rs333947	HDL	1	110470764	A	G	0.0278	0.0017	59.3825	-0.034	0.009	0.00018	-0.0013	0.0053	0.8067	0.0306	0.0338	0.3663	0.00185824	0.875975
rs186147970	HDL	1	120484718	T	C	0.0889	0.0129	11.2579	0.035	0.052	0.5	-0.0965	0.076	0.204	-0.3513	0.3066	0.2519	0.0445919	4.42639e-07
rs181473381	HDL	1	145472741	C	A	0.1436	0.0128	28.4816	0.032	0.079	0.69	0.0642	0.0499	0.1979	-0.0001	0.2498	0.9997	0.0313859	0.0403361
rs192434510	HDL	1	149992277	T	C	0.0244	0.0024	23.5539	-0.038	0.011	0.00099	-0.014	0.0077	0.06911	-0.0709	0.0414	0.08662	0.016181	0.555491
rs72992015	HDL	1	150842696	C	T	0.0219	0.0016	41.9187	-0.0055	0.008	0.49	0.006	0.0049	0.2191	0.0124	0.0287	0.6652	8.75251e-06	0.00277661
rs9616	HDL	1	154555733	A	T	0.0095	0.0014	10.9374	-0.013	0.007	0.067	-0.028	0.0043	1.17e-10	0.0296	0.0258	0.2508	0.989231	0.00801722
rs12161427	HDL	1	156705822	C	T	0.011	0.0014	14.4056	-0.019	0.0068	0.0066	0.0028	0.0041	0.5045	0.006	0.0242	0.8029	0.00206633	0.18591
rs4656984	HDL	1	161078909	T	C	0.0105	0.0014	13.1951	-0.014	0.0065	0.038	0.0014	0.0044	0.7442	0.0028	0.0239	0.9058	0.00163785	0.0388082
rs1771582	HDL	1	161614490	T	G	0.01	0.0015	10.5822	na	na	na	0.0034	0.005	0.4937	na	na	na	0.00341769	0.0235379
rs9425300	HDL	1	172361977	T	G	0.0113	0.0013	17.4496	-0.026	0.0064	5.8e-05	-0.0155	0.004	9.544e-05	-0.0519	0.0236	0.02744	0.704075	0.905567
rs4442420	HDL	1	174168805	T	G	0.0094	0.0013	12.3185	-0.011	0.0065	0.087	-0.0063	0.004	0.1121	-0.0492	0.0237	0.03743	0.00487007	0.0296869
rs630372	HDL	1	177885762	A	G	0.0117	0.0015	14.2083	-0.043	0.0076	2.6e-08	-0.0087	0.0043	0.04159	-0.003	0.0274	0.9141	0.0230857	0.459687
rs4077194	HDL	1	178533832	T	G	0.0183	0.0012	51.7835	-0.0052	0.0063	0.41	-0.0185	0.0037	6.127e-07	-0.0018	0.023	0.9392	0.961912	0.00641616
rs1689797	HDL	1	182150978	A	C	0.0242	0.0013	76.6178	0.0027	0.0067	0.69	-0.0044	0.004	0.2708	0.0119	0.0245	0.6263	0.00338054	0.00558363
rs1952256	HDL	1	184035116	G	A	0.0084	0.0013	9.98446	-0.017	0.0066	0.0088	-0.0102	0.0039	0.009497	0.013	0.0244	0.5952	0.0321104	0.177172
rs6658424	HDL	1	200049302	A	T	0.0092	0.0014	10.3025	-0.02	0.007	0.0052	0.0013	0.0042	0.7487	0.0449	0.0253	0.07609	0.00189011	0.293616
rs12143329	HDL	1	202197659	C	T	0.0099	0.0013	13.5802	-0.011	0.0065	0.11	0.0019	0.0039	0.6357	0.01	0.0238	0.6763	0.00164455	0.0147815
rs13303359	HDL	1	203518873	A	C	0.0118	0.0014	16.456	-0.031	0.0066	3.8e-06	-0.0045	0.0044	0.3055	-0.0525	0.0241	0.0291	0.00329362	0.971122
rs3862948	HDL	1	205099959	A	C	0.0127	0.0014	18.9301	-0.042	0.0074	1.7e-08	-0.0216	0.0042	2.544e-07	-0.042	0.0274	0.1253	0.954987	0.972914
rs3747973	HDL	1	205677148	A	G	0.0149	0.0013	29.6865	-0.016	0.0064	0.014	-0.0045	0.0038	0.2411	-0.0081	0.0235	0.7304	0.00283403	0.353343
rs397982763	HDL	1	209849714	T	TA	0.0175	0.0024	12.5141	na	na	na	0.0031	0.0071	0.6611	na	na	na	0.00223854	0.0235149
rs3767861	HDL	1	212537553	G	A	0.01	0.0013	13.8401	-0.018	0.0067	0.0073	-0.0044	0.0039	0.2595	0.0204	0.0236	0.3875	0.00318765	0.141365
rs59770119	HDL	1	219664627	A	G	0.0159	0.0013	33.6718	-0.046	0.0064	1.3e-12	-0.0142	0.0038	0.0002308	-0.0007	0.0234	0.9776	0.302021	0.863117
rs2642438	HDL	1	220970028	A	G	0.028	0.0014	88.2591	-0.0061	0.007	0.39	0.0046	0.0043	0.2845	0.0558	0.025	0.0258	0.00285706	0.00713712
rs56105022	HDL	1	224544746	A	G	0.0304	0.0038	14.9051	-0.033	0.018	0.071	-0.0112	0.0119	0.3443	-0.0836	0.0675	0.2151	0.00649126	0.0632949
rs4846913	HDL	1	230294715	C	A	0.0483	0.0013	301.42	-0.0029	0.0065	0.66	-0.0216	0.0039	3.529e-08	0.0006	0.0236	0.9802	0.888245	0.00500349
rs145957520	HDL	1	230796872	C	CAT	0.0247	0.0037	10.6089	na	na	na	0.0163	0.0132	0.2191	na	na	na	0.000328017	0.015818
rs553427	HDL	1	234852760	C	T	0.0158	0.0013	33.2618	0.0061	0.0063	0.34	0.0103	0.0039	0.008811	0.0249	0.0235	0.2879	0.0552884	0.00752714
rs6710091	HDL	2	239597	C	G	0.0154	0.0013	31.6472	-0.013	0.0066	0.042	-0.0108	0.0041	0.008039	-0.038	0.0242	0.1167	0.0297819	0.0372797
rs3820897	HDL	2	3642361	C	T	0.0223	0.0016	43.4262	-0.014	0.0084	0.1	0.0229	0.0046	7.555e-07	0.0056	0.0297	0.8498	0.955489	0.0219362
rs2090034	HDL	2	20372409	A	G	0.0137	0.0012	29.4619	-0.003	0.0063	0.64	-0.0041	0.0037	0.2663	-0.0057	0.0231	0.8042	0.00216503	0.00532361
rs676210	HDL	2	21231524	G	A	0.0569	0.0015	314.139	0.0026	0.0082	0.75	0.0087	0.0044	0.0481	-0.0333	0.0279	0.232	3.94304e-14	0.00605768
rs116500366	HDL	2	21979516	G	A	0.0152	0.0044	3.25867	0.033	0.021	0.12	-0.0071	0.0171	0.6797	0.0713	0.0871	0.4135	0.0151237	0.0349304
rs13432533	HDL	2	26571411	A	G	0.009	0.0013	11.3546	-0.013	0.0064	0.047	-0.0144	0.004	0.0003313	-0.0902	0.0232	9.949e-05	0.422102	0.027213
rs1260326	HDL	2	27730940	T	C	0.004	0.0013	2.67954	0.067	0.0065	1.3e-24	-0.0128	0.0038	0.0008263	-0.1364	0.0233	5.119e-09	0.00138377	0.0670331
rs13389106	HDL	2	30480750	G	T	0.0115	0.0015	13.7532	-0.019	0.0081	0.021	-0.0023	0.0046	0.6161	-0.0068	0.0293	0.8162	0.00202693	0.0723088
rs3755303	HDL	2	42590122	C	G	0.0091	0.0013	11.5918	-0.0069	0.0068	0.31	-0.006	0.004	0.1368	0.0514	0.0246	0.03706	0.00503096	0.00755972
rs17326656	HDL	2	48962291	T	G	0.0152	0.0015	23.4056	-0.0074	0.0075	0.33	-0.0094	0.0048	0.05103	0.0275	0.0277	0.3209	0.0116158	0.00871009
rs2253760	HDL	2	54033988	C	G	0.0105	0.0013	15.1777	-0.013	0.0065	0.047	0.0029	0.0038	0.4381	-0.0071	0.0232	0.7584	0.00187795	0.0427244
rs10460509	HDL	2	58772377	T	A	0.0101	0.0013	14.1026	-0.017	0.0064	0.0083	-0.0102	0.0038	0.00714	-0.0596	0.0232	0.0103	0.0450212	0.100272
rs35603314	HDL	2	59293596	C	A	0.009	0.0014	9.89005	-0.031	0.0066	2.6e-06	-0.0078	0.0042	0.06469	-0.0501	0.0245	0.04116	0.0396648	0.526783
rs2540949	HDL	2	65284231	A	T	0.0151	0.0013	30.4631	-0.051	0.0065	5.7e-15	-0.0099	0.0038	0.009613	-0.0235	0.0236	0.3194	0.029977	0.995155
rs1519103	HDL	2	66677881	G	T	0.0106	0.0013	15.4528	-0.022	0.0067	0.0012	-0.0071	0.004	0.07398	-0.0444	0.0246	0.07096	0.00963708	0.416571
rs6546564	HDL	2	70233392	C	T	0.009	0.0013	11.3546	0.011	0.0066	0.1	0.0119	0.0039	0.002254	0.0331	0.024	0.168	0.102554	0.0226862
rs7608892	HDL	2	85542718	G	A	0.0102	0.0013	14.3676	-0.0052	0.0063	0.41	-0.0131	0.004	0.00094	0.0241	0.0231	0.2962	0.000342914	0.00644363
rs4851250	HDL	2	100729293	T	C	0.0135	0.0017	14.6984	-0.035	0.0085	3.3e-05	-0.0078	0.0049	0.1147	0	0.0303	0.9998	0.0109615	0.919156
rs3789112	HDL	2	111714577	T	C	0.0102	0.0014	12.4949	0.017	0.007	0.014	-0.0013	0.0042	0.752	0.0351	0.0252	0.1643	0.00162219	0.0692258
rs11688682	HDL	2	121347612	G	C	0.0173	0.0017	23.5976	-0.058	0.0075	1.4e-14	-0.0103	0.0056	0.06346	-0.03	0.0286	0.2949	0.0106956	0.999982
rs3739020	HDL	2	136602491	T	G	0.014	0.0015	19.9889	0.0064	0.0081	0.43	0.003	0.0042	0.4697	-0.0352	0.0277	0.2031	0.00214915	0.00865365
rs7571848	HDL	2	146353184	T	A	0.0086	0.0013	10.4311	-0.025	0.0064	0.00013	-0.0131	0.0038	0.0005741	-0.052	0.0236	0.02772	0.783764	0.84991
rs2509902	HDL	2	158514969	C	T	0.0131	0.0018	12.4693	-0.021	0.0095	0.026	-0.0107	0.0054	0.04748	0.0032	0.0352	0.9265	0.011799	0.0498493
rs62189714	HDL	2	162966841	C	A	0.0078	0.0013	8.70483	0.0078	0.0065	0.23	-0.0043	0.004	0.2867	-0.0165	0.024	0.4906	0.020649	0.011452
rs75265117	HDL	2	165518799	C	G	0.0427	0.002	100.409	-0.085	0.0097	2e-18	-0.0163	0.0063	0.009084	-0.0656	0.035	0.06133	0.0219345	0.535323
rs1866631	HDL	2	174075761	A	G	0.0095	0.0013	12.5658	0.0083	0.0061	0.18	-0.0025	0.0038	0.5197	0.0169	0.0233	0.4685	0.00181652	0.0117049
rs16829016	HDL	2	188292458	C	T	0.0104	0.0014	12.9595	-0.0065	0.0069	0.35	-0.0207	0.0042	8.187e-07	-0.0057	0.0249	0.8191	0.568821	0.0102126
rs7581601	HDL	2	203497786	C	A	0.0179	0.0014	36.7054	0.011	0.0068	0.11	-0.0229	0.0044	2.512e-07	-0.0231	0.0249	0.3536	1.50644e-12	0.00397037
rs2551657	HDL	2	208372913	T	G	0.0125	0.0016	14.2513	-0.016	0.0079	0.037	-0.0103	0.0051	0.04511	0.0154	0.0291	0.597	0.0136503	0.0407825
rs1047891	HDL	2	211540507	A	C	0.0159	0.0014	29.1653	0.0041	0.0068	0.55	0.015	0.0041	0.000236	0.0088	0.025	0.7248	0.532691	0.00600359
rs3791699	HDL	2	212274447	A	G	0.0085	0.0014	8.89696	-0.018	0.0073	0.014	-0.0179	0.0042	1.57e-05	0.0191	0.0266	0.4735	0.957552	0.371592
rs4416211	HDL	2	215377588	A	T	0.0084	0.0013	9.98446	0.0029	0.0063	0.65	0.0006	0.0038	0.8825	0.0367	0.0231	0.1119	0.0235226	0.00627819
rs78058190	HDL	2	219699999	A	G	0.0804	0.0035	116.046	-0.075	0.016	1.3e-06	-0.0528	0.0182	0.003623	0.0853	0.0669	0.2022	0.253905	0.999046
rs2972145	HDL	2	227101309	C	T	0.0367	0.0013	174.611	-0.094	0.0066	2.3e-45	-0.0245	0.0041	1.695e-09	-0.0132	0.024	0.5833	0.887081	0.982676
rs11694828	HDL	2	228565656	G	A	0.014	0.0014	22.817	-0.0036	0.0065	0.58	0.0076	0.0043	0.08041	-0.0095	0.0233	0.6822	0.00757511	0.00549287
rs985891	HDL	2	230019348	A	G	0.0099	0.0013	13.5802	-0.0026	0.0066	0.7	0.0153	0.0041	0.0001562	0.0108	0.024	0.6536	0.0539064	0.00530907
rs4675812	HDL	2	242395674	G	A	0.0138	0.0013	25.5973	-0.0035	0.0064	0.59	0.004	0.0037	0.2832	-0.0093	0.0234	0.6911	0.00256195	0.00556092
rs12633551	HDL	3	12360494	T	C	0.047	0.0031	51.1952	-0.09	0.019	3e-06	-0.0058	0.0084	0.4888	-0.072	0.0686	0.2944	0.00267906	9.52954e-19
rs2455850	HDL	3	15782711	A	C	0.0116	0.0014	15.9303	-0.027	0.0068	9.6e-05	-0.0097	0.0042	0.01963	-0.0354	0.0248	0.1528	0.0083188	0.117104
rs113967141	HDL	3	24302811	A	G	0.0177	0.0019	19.917	-0.0009	0.011	0.93	-0.0099	0.0058	0.08733	-0.0017	0.0377	0.9631	0.00573686	0.00731225
rs7622114	HDL	3	36960660	C	A	0.0126	0.0013	21.488	-0.02	0.0065	0.002	-0.0039	0.0038	0.2992	-0.0292	0.0234	0.2123	0.00212961	0.134958
rs2305637	HDL	3	47045846	T	C	0.0205	0.0017	32.7588	-0.013	0.0087	0.14	0.0107	0.0051	0.0369	-0.0326	0.0316	0.3023	0.0112765	2.3431e-05
rs11925192	HDL	3	50038664	A	G	0.0216	0.0013	61.2682	-0.033	0.0063	2.1e-07	-0.0105	0.0038	0.006505	-0.0136	0.023	0.5541	0.053484	0.674546
rs138789058	HDL	3	52124388	T	C	0.0404	0.0052	14.1026	-0.049	0.025	0.051	-0.0229	0.018	0.2041	0.0541	0.1017	0.595	0.00483391	0.0087973
rs9968117	HDL	3	52838654	C	T	0.0232	0.0019	33.5637	-0.015	0.01	0.13	0.0045	0.0056	0.4146	-0.0024	0.0353	0.9456	8.98259e-05	0.017672
rs4597680	HDL	3	57596105	C	T	0.0108	0.0016	10.8302	0.0089	0.0077	0.25	-0.0057	0.0049	0.2468	-0.0134	0.0283	0.6346	0.00369727	0.00709403
rs76824303	HDL	3	62459819	A	C	0.0145	0.0023	9.53849	-0.023	0.011	0.036	-0.0095	0.0073	0.1946	-0.0554	0.0408	0.1748	0.00556962	0.0723538
rs12486424	HDL	3	66874481	C	A	0.0084	0.0013	9.98446	-0.0059	0.007	0.4	-0.0041	0.004	0.3076	0.0147	0.0255	0.5634	0.0140909	0.324295
rs2114660	HDL	3	69803691	T	A	0.0103	0.0015	11.1823	-0.024	0.0077	0.0017	-0.0161	0.0049	0.000928	0.029	0.0278	0.2963	0.627566	0.317489
rs4974290	HDL	3	70508703	C	G	0.009	0.0013	11.3546	-0.027	0.0064	2.1e-05	-0.0134	0.0038	0.0004451	-0.0286	0.0235	0.2243	0.245288	0.800797
rs62247166	HDL	3	71532738	C	T	0.0088	0.0013	10.8878	-0.026	0.0063	3.4e-05	-0.0102	0.004	0.01009	-0.002	0.0232	0.9304	0.214933	0.883489
rs13066793	HDL	3	87037543	A	G	0.0172	0.0024	12.1144	-0.03	0.011	0.0083	0.0172	0.0075	0.02094	-0.0749	0.0449	0.09505	0.0400792	0.185865
rs7643617	HDL	3	114753078	C	A	0.0177	0.0019	19.917	-0.033	0.011	0.0019	-0.0086	0.0055	0.1172	0.0315	0.0382	0.4091	0.00647674	0.516612
rs3732356	HDL	3	119529113	T	G	0.0273	0.0023	31.7687	0.0033	0.013	0.8	-0.0088	0.007	0.2063	0.0327	0.0458	0.4751	0.00436419	0.00931784
rs11708067	HDL	3	123065778	G	A	0.0127	0.0015	16.5977	0.089	0.0076	1.3e-31	0.0155	0.0047	0.001125	-0.0009	0.0272	0.9725	0.274132	0.999645
rs2811468	HDL	3	129296847	A	G	0.0126	0.0015	16.3502	-0.031	0.0081	0.00012	-0.0093	0.0046	0.04267	0.0081	0.0287	0.7779	0.00945425	0.81169
rs6762415	HDL	3	133478557	G	T	0.0085	0.0012	11.8516	-0.0047	0.0063	0.46	-0.0075	0.0038	0.04618	-0.0115	0.0231	0.6183	0.0105405	0.00577196
rs687339	HDL	3	135932359	T	C	0.0244	0.0015	58.7691	-0.035	0.0076	4.7e-06	-0.038	0.0045	3.156e-17	-0.0838	0.0275	0.002314	0.939354	0.822103
rs62271373	HDL	3	150066540	A	T	0.0364	0.0031	31.1096	-0.088	0.014	1e-09	-0.0481	0.0096	5.537e-07	-0.0326	0.0511	0.5235	0.998854	0.999936
rs1426383	HDL	3	152016969	C	T	0.0128	0.0014	19.2159	-0.025	0.007	0.00037	-0.0054	0.0041	0.1882	-0.0021	0.025	0.932	0.0046333	0.824017
rs16846895	HDL	3	153851061	G	A	0.0118	0.0017	11.4102	-0.013	0.01	0.18	0.0023	0.0048	0.633	-0.0109	0.035	0.7556	9.19839e-06	0.0166059
rs62285077	HDL	3	156244888	C	T	0.0094	0.0017	7.49308	0.0077	0.0087	0.37	-0.0068	0.0054	0.2091	0.0182	0.031	0.5564	0.00436613	0.0154552
rs67261871	HDL	3	156797941	T	C	0.0205	0.0013	55.2953	0.014	0.0065	0.034	-0.0063	0.0038	0.0952	0.0276	0.0235	0.2407	5.06299e-07	0.0341678
rs4894529	HDL	3	171959684	G	A	0.0083	0.0013	9.7649	-0.0031	0.0064	0.63	-0.002	0.0038	0.6026	0.0287	0.0231	0.2147	0.0016297	0.00564803
rs1516725	HDL	3	185824004	T	C	0.0292	0.0019	52.5742	0.027	0.0094	0.0038	0.0064	0.0058	0.2629	0.0353	0.0338	0.2967	0.00504126	0.243555
rs139828053	HDL	3	195298892	C	T	0.0294	0.0042	11.5918	0.0025	0.019	0.9	-0.0204	0.0136	0.1329	-0.1523	0.0741	0.03981	0.0148595	0.0138236
rs4916497	HDL	3	196198533	T	C	0.009	0.0014	9.89005	-0.0064	0.007	0.36	-0.0019	0.0042	0.6552	-0.0073	0.0257	0.7758	0.00204894	0.00825535
rs13101828	HDL	4	965720	A	G	0.0135	0.0013	24.5356	0.0022	0.0065	0.74	-0.0125	0.0038	0.001098	0.0121	0.0231	0.5999	0.273127	0.00267917
rs28619238	HDL	4	2260812	T	C	0.012	0.0017	11.7749	0.0055	0.0093	0.55	0.002	0.0049	0.6843	0.0217	0.0324	0.5044	0.00215063	0.00762057
rs362307	HDL	4	3241845	T	C	0.0181	0.0026	11.4729	-0.074	0.012	1.1e-09	-0.0276	0.0084	0.001027	-0.0412	0.0448	0.3575	0.00703511	0.998698
rs4450871	HDL	4	4990298	A	G	0.011	0.0014	14.4056	-0.015	0.0065	0.022	-0.0065	0.0045	0.1502	-0.0299	0.0258	0.2466	0.00452889	0.0546222
rs7673321	HDL	4	17957688	A	T	0.0138	0.0017	15.323	-0.016	0.0091	0.076	-0.0109	0.0052	0.03514	-0.0223	0.0316	0.4794	0.0320553	0.000985792
rs73243877	HDL	4	26047616	G	A	0.0208	0.0018	30.1599	-0.0025	0.0087	0.77	0	0.0056	0.9986	0.0158	0.0307	0.6072	0.00224776	0.0064425
rs3912391	HDL	4	39698824	G	A	0.009	0.0013	11.3546	0.0002	0.0063	0.97	-0.0014	0.0038	0.7069	-0.0273	0.023	0.2345	0.00161165	0.00471645
rs10938398	HDL	4	45186139	A	G	0.009	0.0013	11.3546	-0.044	0.0064	4.9e-12	-0.0208	0.0038	4.604e-08	-0.0251	0.0232	0.2807	0.995817	0.996276
rs150361490	HDL	4	55530748	ATTATTTAT	A	0.0109	0.0014	14.1591	na	na	na	0.0184	0.005	0.0002179	na	na	na	0.781135	0.00497611
rs35662434	HDL	4	69339933	A	G	0.0149	0.0016	19.9036	-0.009	0.008	0.26	0.0182	0.005	0.0002492	-0.0197	0.0281	0.4822	0.330878	0.0102508
rs573930512	HDL	4	74512280	G	A	0.1578	0.0208	13.4834	0.2	0.1	0.055	na	na	na	-1.0372	0.632	0.1008	0.000707192	0.105579
rs2175766	HDL	4	76572191	A	C	0.0098	0.0013	13.3228	0.0046	0.0065	0.48	-0.0026	0.0038	0.4878	-0.0396	0.0231	0.08653	0.00173652	0.00535812
rs11099563	HDL	4	83907105	A	G	0.0114	0.0014	15.4133	-0.0022	0.0076	0.77	-0.0041	0.0041	0.3154	-0.0342	0.0271	0.2074	0.00260677	0.00577354
rs342469	HDL	4	88050554	A	G	0.0154	0.0012	36.9719	0.0071	0.0065	0.28	-0.0003	0.0037	0.9404	0.022	0.0236	0.3512	0.0014944	0.00881046
rs2167750	HDL	4	89730074	T	C	0.0192	0.0012	56.8936	-0.034	0.0063	8.2e-08	-0.0133	0.0037	0.000306	-0.0054	0.0232	0.8166	0.61394	0.959309
rs12650112	HDL	4	99788480	C	T	0.0088	0.0013	10.8878	-0.0022	0.0066	0.74	0.0072	0.0039	0.06275	0.0153	0.0241	0.5261	0.00575168	0.0160754
rs1873518	HDL	4	100465173	G	A	0.0291	0.0026	28.3519	0.032	0.017	0.061	0.0058	0.007	0.4059	0.0689	0.0601	0.2519	0.00268121	0.0420938
rs13107325	HDL	4	103188709	T	C	0.0817	0.0027	200.404	-0.048	0.013	0.00033	-0.0011	0.008	0.8876	-0.1603	0.0429	0.0001845	0.00315758	0.841813
rs74332078	HDL	4	103766720	A	G	0.0349	0.0039	18.4441	-0.033	0.019	0.079	-0.0374	0.0117	0.001383	-0.0876	0.0691	0.2049	0.232164	0.000198094
rs9884482	HDL	4	106081636	C	T	0.0111	0.0013	16.8664	0.01	0.0066	0.12	-0.0105	0.0039	0.006533	0.02	0.0234	0.3923	0.0647394	0.00557348
rs138307849	HDL	4	110095620	C	T	0.1174	0.0092	36.5668	-0.082	0.043	0.053	-0.0374	0.028	0.1807	0.1837	0.1547	0.2351	0.0223977	0.120405
rs114816312	HDL	4	110638824	T	C	0.1259	0.009	43.7394	-0.06	0.042	0.15	-0.0398	0.0264	0.132	0.1742	0.159	0.2734	0.0290788	0.063508
rs62328321	HDL	4	143319721	C	T	0.0089	0.0013	11.12	-0.0057	0.0066	0.39	-0.0035	0.0039	0.3675	-0.0527	0.0238	0.02652	0.00253153	0.00749427
rs2290846	HDL	4	151199080	A	G	0.0102	0.0014	12.4949	-0.011	0.0071	0.12	0.0064	0.0043	0.1403	-0.0054	0.0257	0.8322	0.00438058	0.0171757
rs72729623	HDL	4	154208278	T	C	0.017	0.0019	18.4388	-0.018	0.0091	0.041	-0.0031	0.0059	0.6037	0.0381	0.0339	0.2611	0.00188895	0.0483931
rs11100083	HDL	4	157682598	T	C	0.0176	0.0014	35.5183	-0.038	0.0076	6.3e-07	-0.0153	0.0043	0.0003505	-0.0594	0.0275	0.03053	0.386021	0.700733
rs72707016	HDL	5	665148	A	G	0.0112	0.0017	10.3516	0.0033	0.0081	0.68	-0.0023	0.0052	0.6509	-0.0431	0.0291	0.1385	0.00200786	0.00635256
rs4449583	HDL	5	1284135	T	C	0.0092	0.0014	10.3025	-0.0018	0.0071	0.8	0.0168	0.0041	4.583e-05	-0.0359	0.0251	0.153	0.861889	0.00487473
rs16868954	HDL	5	39451982	C	T	0.0274	0.003	19.1777	-0.021	0.016	0.18	-0.0127	0.0086	0.1411	0.0838	0.0602	0.164	0.00822784	0.0278611
rs6866562	HDL	5	52697383	A	G	0.0097	0.0012	15.2005	-0.022	0.0063	0.00059	-0.0085	0.0038	0.02278	-0.0249	0.0229	0.277	0.0188957	0.0832873
rs1664781	HDL	5	53276301	A	G	0.0127	0.0014	18.9301	-0.05	0.0069	6e-13	-0.0099	0.0041	0.0161	-0.0478	0.0249	0.0544	0.190779	0.950399
rs465002	HDL	5	55808475	T	C	0.0254	0.0014	72.835	-0.073	0.0073	3.8e-23	-0.0224	0.0041	3.648e-08	-0.0407	0.0265	0.1245	0.445271	0.992786
rs4976033	HDL	5	67714246	G	A	0.0124	0.0013	20.8387	-0.035	0.0065	1e-07	-0.0082	0.0038	0.03053	-0.0448	0.0234	0.05519	0.0131766	0.998914
rs2544645	HDL	5	72919127	G	C	0.0132	0.0015	17.8639	0.0001	0.0071	0.99	-0.0187	0.0044	1.99e-05	-0.0509	0.026	0.0497	0.889197	0.00550144
rs2307111	HDL	5	75003678	T	C	0.0161	0.0013	34.4995	-0.053	0.0065	3.3e-16	-0.0149	0.0038	9.092e-05	0.0044	0.0234	0.8515	0.552732	0.999379
rs9293683	HDL	5	75700310	C	T	0.0106	0.0014	13.4328	0.0025	0.0067	0.71	-0.0017	0.0046	0.7058	-0.0316	0.0243	0.1925	0.00173834	0.00534466
rs7733997	HDL	5	78543716	T	G	0.0081	0.0013	9.33334	-0.038	0.0065	5.3e-09	0.004	0.0038	0.2904	-0.0227	0.024	0.3438	0.0034606	0.739137
rs115912456	HDL	5	82815158	A	G	0.0273	0.0033	15.883	-0.027	0.016	0.086	-0.0157	0.0104	0.1297	-0.0711	0.0573	0.2148	0.0120494	0.0483195
rs25863	HDL	5	96105926	G	A	0.0081	0.0013	9.33334	-0.015	0.0064	0.022	0.0057	0.0038	0.1352	0.0141	0.023	0.5389	0.00359966	0.0333737
rs7732198	HDL	5	112379659	C	T	0.0094	0.0013	12.3185	-0.027	0.0063	2.1e-05	-0.003	0.0038	0.4281	-0.0446	0.0229	0.05182	0.00206265	0.961965
rs1045242	HDL	5	118729327	A	G	0.0159	0.0014	29.1653	-0.016	0.0071	0.026	-0.0078	0.0043	0.06762	-0.0418	0.0255	0.101	0.0078045	0.0555704
rs17764730	HDL	5	127357526	C	T	0.0123	0.0015	15.6191	-0.035	0.0075	4.3e-06	-0.0121	0.0045	0.007351	-0.0241	0.027	0.3719	0.0599089	0.985789
rs10478901	HDL	5	129196638	A	T	0.0083	0.0013	9.7649	0.0044	0.0066	0.51	-0.0005	0.0038	0.8965	-0.0421	0.0244	0.08455	0.00162438	0.00647739
rs26008	HDL	5	131008194	T	C	0.0182	0.0023	14.6	-0.02	0.013	0.14	-0.0007	0.0067	0.9124	0.0465	0.047	0.3229	0.00255161	0.0273962
rs72801474	HDL	5	132444128	G	A	0.0255	0.0024	25.642	-0.026	0.011	0.015	-0.0195	0.0077	0.01147	-0.0415	0.0431	0.3364	0.0620012	0.123634
rs254559	HDL	5	134444982	A	C	0.0104	0.0013	14.9051	0.0099	0.0065	0.13	-0.0106	0.0039	0.006548	0.0088	0.0236	0.7108	0.0487451	0.0170679
rs137859889	HDL	5	141542219	G	GA	0.0096	0.0015	9.80861	na	na	na	na	na	na	na	na	na	0.00193994	0.294865
rs35553545	HDL	5	148844793	T	G	0.0098	0.0015	10.1916	0.026	0.0074	0.00037	0.0011	0.0046	0.8129	0.0136	0.0273	0.6177	0.00176553	0.74017
rs1438588	HDL	5	153444950	G	A	0.011	0.0013	16.5786	-0.018	0.0066	0.0077	-0.0138	0.0039	0.0004417	-0.0064	0.0239	0.7891	0.322723	0.134097
rs1651274	HDL	5	158020425	G	A	0.0188	0.0014	40.3859	-0.037	0.0075	8.3e-07	-0.0175	0.0042	2.959e-05	-0.0164	0.0272	0.5462	0.657806	0.907973
rs55801554	HDL	5	158622532	C	A	0.0111	0.0014	14.6543	-0.012	0.0073	0.097	0.0055	0.0043	0.1999	0.0456	0.0263	0.08321	0.00259035	0.0198637
rs2339234	HDL	5	170612546	A	G	0.0105	0.0014	13.1951	-0.027	0.0068	8e-05	-0.0164	0.0043	0.000149	-0.0484	0.025	0.05339	0.635705	0.711605
rs8543	HDL	5	172591337	T	G	0.0127	0.002	9.66693	-0.0084	0.0093	0.36	-0.0086	0.0062	0.1695	0.0163	0.0346	0.6378	0.00179007	0.0119465
rs72812818	HDL	5	173356752	C	G	0.0108	0.0014	13.9148	-0.018	0.0068	0.0075	0.0181	0.0043	2.929e-05	-0.0492	0.0252	0.05096	0.740751	0.123262
rs78523677	HDL	5	176551103	C	A	0.0163	0.0017	21.0477	0.015	0.0091	0.091	-0.001	0.005	0.8394	-0.0122	0.0327	0.7098	0.00177787	0.0295799
rs138692142	HDL	5	180349778	T	C	0.0724	0.0077	20.2738	0.063	0.036	0.085	-0.0563	0.0316	0.07498	-0.0479	0.1413	0.7345	0.0516206	0.0807345
rs1262925	HDL	6	16810627	G	T	0.0116	0.0014	15.9303	-0.001	0.0068	0.88	-0.0034	0.0042	0.4197	-0.0514	0.0258	0.04663	0.00203137	0.0061633
rs806794	HDL	6	26200677	A	G	0.0098	0.0013	13.3228	-0.03	0.007	2.2e-05	na	na	na	0.018	0.0252	0.474	3.815e-07	0.944121
rs1321505	HDL	6	28052823	C	A	0.0133	0.0019	11.5918	-0.013	0.0093	0.15	0.0039	0.0054	0.4755	0.0344	0.0337	0.3074	1.0968e-07	0.0121248
rs2248162	HDL	6	29915061	T	C	0.0105	0.0014	13.1951	-0.0008	0.0068	0.91	0.0027	0.0043	0.5283	-0.0376	0.0242	0.1211	2.7763e-08	0.00564469
rs1264377	HDL	6	30764907	A	G	0.0147	0.0019	13.9918	-0.021	0.0089	0.017	0.0073	0.0055	0.184	-0.0076	0.0308	0.805	5.34224e-09	0.0290141
rs4947249	HDL	6	31302029	G	A	0.0178	0.0014	36.3075	-0.04	0.0066	1.3e-09	-0.0092	0.004	0.02206	-0.0101	0.0243	0.677	7.75508e-13	0.00228443
rs73728888	HDL	6	32596370	T	C	0.0378	0.0035	26.4632	-0.0026	0.016	0.87	-0.0298	0.0098	0.002272	0.0612	0.0719	0.3946	4.59369e-06	2.68906e-05
rs148889882	HDL	6	34141700	A	C	0.0416	0.0039	25.8364	-0.083	0.018	4.3e-06	-0.0459	0.0124	0.0002026	-0.0009	0.0635	0.9885	0.528821	0.00296005
rs2744944	HDL	6	34658080	A	C	0.027	0.0013	95.0853	0.0066	0.0066	0.32	-0.0208	0.0039	1.078e-07	0.0147	0.0241	0.5422	0.00158241	0.00565277
rs11754612	HDL	6	35476562	A	T	0.0167	0.0021	14.7376	0.021	0.01	0.042	-0.016	0.0065	0.01435	-0.0281	0.0381	0.4615	0.00685569	0.00706307
rs7772800	HDL	6	36477260	A	G	0.0109	0.0015	12.4336	-0.01	0.0082	0.2	-0.0022	0.0044	0.6267	-0.0379	0.0295	0.1989	0.00183818	0.0124842
rs142449754	HDL	6	41986427	T	C	0.0166	0.0015	27.7398	0.0006	0.0073	0.93	0.0058	0.0045	0.2012	0.0153	0.0267	0.568	0.00386739	0.00456008
rs9296406	HDL	6	42940810	T	C	0.0155	0.0013	32.0471	-0.011	0.0063	0.075	-0.0076	0.0038	0.04774	-0.017	0.0232	0.4624	0.00542351	0.0155604
rs11967262	HDL	6	43760327	G	C	0.0309	0.0013	124.158	-0.041	0.0064	1.4e-10	-0.0337	0.0038	5.153e-19	0.0065	0.0234	0.7808	0.983377	0.0668299
rs2749013	HDL	6	52627165	A	G	0.0135	0.0013	24.5356	0.021	0.0066	0.0017	0.0039	0.0041	0.3497	0.0253	0.0243	0.2976	0.00231919	0.39281
rs2842611	HDL	6	86302034	G	A	0.0087	0.0013	10.6582	-0.0094	0.0064	0.14	-0.0057	0.0038	0.1333	0.0222	0.0229	0.3326	0.00321344	0.0231146
rs77910749	HDL	6	98566506	CT	C	0.0104	0.0013	14.9051	na	na	na	0.0018	0.0043	0.6746	na	na	na	0.00296571	0.41557
rs60033497	HDL	6	107444903	G	C	0.0094	0.0014	10.7236	-0.039	0.0069	2.7e-08	-0.0009	0.0043	0.8371	-0.047	0.0254	0.0645	0.00164024	0.981922
rs565216100	HDL	6	109064220	C	T	0.0174	0.0022	14.5862	na	na	na	-0.0036	0.0093	0.7012	na	na	na	0.00637636	0.0253149
rs4946955	HDL	6	109639710	G	C	0.0164	0.0013	35.7602	0.0018	0.0073	0.81	0.0019	0.004	0.6338	-0.0378	0.025	0.13	0.00173172	0.0043815
rs1538385	HDL	6	116327493	A	G	0.0157	0.0013	32.8543	-0.012	0.0064	0.062	-0.0069	0.0039	0.07453	-0.0181	0.0233	0.4371	0.00620649	0.0285172
rs2800708	HDL	6	127437617	T	C	0.0185	0.0012	52.898	0.012	0.0064	0.062	-0.0127	0.0037	0.0006232	-0.0896	0.0231	0.0001068	0.286165	2.61896e-10
rs2245133	HDL	6	131931092	C	T	0.0141	0.0016	17.9123	-0.035	0.0085	3.9e-05	-0.0187	0.0049	0.0001245	-0.0401	0.0314	0.2017	0.754527	0.790116
rs7758845	HDL	6	135428537	C	A	0.0116	0.0014	15.9303	0.0004	0.0071	0.96	0.014	0.0041	0.0006212	-0.0232	0.0259	0.3708	0.852169	0.00529509
rs6924387	HDL	6	137082948	G	A	0.0127	0.0013	21.8164	-0.013	0.0065	0.049	0.0012	0.0038	0.7543	-0.0172	0.0238	0.4704	0.00163983	0.0340006
rs2750415	HDL	6	139261477	A	G	0.0141	0.0016	17.9123	0.018	0.0085	0.032	0.0022	0.0048	0.644	-0.0502	0.0302	0.09679	0.00214212	0.0471666
rs17585887	HDL	6	139835498	T	C	0.0201	0.0012	62.247	-0.032	0.0064	5.3e-07	-0.0074	0.0038	0.04905	-0.0239	0.0233	0.3068	0.00983352	0.981874
rs1281951	HDL	6	153462557	A	G	0.0137	0.0013	25.2409	-0.022	0.0064	0.00054	-0.0015	0.004	0.7058	0.0154	0.0236	0.5121	0.0015493	0.00587321
rs41272086	HDL	6	161008646	A	G	0.057	0.0023	134.86	-0.016	0.011	0.13	0.0415	0.0073	1.188e-08	-0.0486	0.0378	0.1989	4.65823e-131	0.00653492
rs147829643	HDL	6	161588372	T	C	0.0301	0.0037	15.3857	-0.0004	0.017	0.98	0.0293	0.0129	0.02291	-0.0936	0.0649	0.1495	1.01472e-11	0.0110901
rs13191362	HDL	6	163033350	A	G	0.0133	0.002	10.533	-0.027	0.0098	0.0064	-0.0161	0.0063	0.01112	-0.0655	0.0353	0.06379	0.0385707	0.144998
rs7761309	HDL	6	163745049	G	A	0.0111	0.0013	16.8664	-0.023	0.0066	0.00067	-0.0109	0.0038	0.004073	0.0107	0.0237	0.6526	0.11919	0.748537
rs10233430	HDL	7	1051664	C	T	0.0171	0.0013	38.7912	-0.0094	0.0066	0.16	-0.0004	0.0037	0.9138	0.0101	0.0232	0.6639	0.00256761	0.021239
rs144787122	HDL	7	2296552	A	G	0.0882	0.0122	12.3145	-0.11	0.054	0.043	-0.0314	0.0383	0.4114	0.2618	0.1934	0.1758	0.019749	0.00761991
rs79949326	HDL	7	6461310	C	T	0.0273	0.0014	83.9595	-0.024	0.0073	0.0012	-0.0201	0.0044	6.107e-06	-0.0242	0.0268	0.3669	0.74137	0.483915
rs4721060	HDL	7	12267552	A	G	0.0113	0.0012	20.332	-0.021	0.0064	0.00094	-0.0225	0.0037	1.234e-09	0.0354	0.0233	0.1295	0.796125	0.532464
rs38189	HDL	7	15903403	A	T	0.0088	0.0013	10.8878	-0.019	0.0066	0.0049	-0.0122	0.0037	0.001107	-0.0092	0.024	0.7002	0.205672	0.26033
rs6968554	HDL	7	17287106	G	A	0.0116	0.0013	18.3434	-0.023	0.0066	0.0006	-0.0142	0.0038	0.0002157	-0.0079	0.0238	0.739	0.602052	0.475418
rs10242866	HDL	7	17920613	T	C	0.0248	0.0013	80.4059	-0.0004	0.0065	0.95	-0.0028	0.0038	0.458	-0.0373	0.0235	0.1123	0.00184526	0.004726
rs1534696	HDL	7	26397239	C	A	0.0154	0.0013	31.6472	-0.028	0.0064	1.6e-05	-0.0082	0.0039	0.0373	0.0161	0.023	0.4842	0.0127017	0.979634
rs71553019	HDL	7	35671204	C	CATATATAAATATATATAA	0.0101	0.0015	10.7804	na	na	na	-0.0028	0.0047	0.5572	na	na	na	0.00181161	0.512944
rs12533197	HDL	7	36192606	G	T	0.0156	0.0013	32.4494	0.008	0.0064	0.21	-0.0083	0.0039	0.03195	0.0049	0.0232	0.8319	0.0141346	0.00942122
rs138994411	HDL	7	38265179	CTTGAAAAGACAACCTTTCCCCATTGTACTGAT	C	0.0143	0.0013	27.4178	na	na	na	0.0044	0.0049	0.3705	na	na	na	0.00173579	0.0632359
rs876039	HDL	7	50308811	G	C	0.0165	0.0013	36.1855	0.0053	0.0068	0.44	-0.0142	0.004	0.0003875	-0.0122	0.0248	0.6223	0.431004	0.00674901
rs35753501	HDL	7	72330303	C	T	0.0304	0.0046	10.4115	0.062	0.021	0.0033	0.0056	0.0158	0.723	-0.2274	0.0783	0.003677	0.0062753	0.493693
rs55747707	HDL	7	73037366	G	A	0.0372	0.0016	118.847	0.0071	0.0081	0.38	-0.0042	0.005	0.3916	-0.0431	0.0289	0.1361	0.00273953	0.00691189
rs112924314	HDL	7	74361240	T	C	0.0252	0.0031	15.3638	0.0019	0.015	0.9	-0.0062	0.0145	0.6693	-0.0743	0.0511	0.1459	0.00322842	0.0107181
rs3211938	HDL	7	80300449	T	G	0.1321	0.0084	54.9998	na	na	na	0.0519	0.0236	0.02773	-0.0898	0.6873	0.8961	0.0667869	0.0858276
rs74705598	HDL	7	80851648	G	C	0.098	0.0115	16.8036	na	na	na	na	na	na	0.3825	0.9939	0.7004	0.0152017	0.0720591
rs705379	HDL	7	94953895	A	G	0.0091	0.0013	11.5918	-0.0014	0.0068	0.84	0.0029	0.0039	0.4537	0.052	0.0233	0.02541	0.00326081	0.00814008
rs427534	HDL	7	101886704	A	G	0.0083	0.0013	9.7649	0.0015	0.0065	0.82	-0.0115	0.0042	0.006148	0.002	0.024	0.9342	0.0287153	0.00054058
rs257378	HDL	7	106801395	C	G	0.0145	0.0016	18.8945	-0.0075	0.008	0.35	-0.0147	0.005	0.003669	-0.0015	0.0291	0.9582	0.394172	0.00560125
rs10229792	HDL	7	116982907	A	G	0.0122	0.0013	20.1997	0.013	0.0066	0.044	-0.0156	0.0039	5.344e-05	-0.0361	0.0241	0.134	0.770624	0.0344545
rs13234269	HDL	7	130429186	T	A	0.0291	0.0013	110.255	-0.048	0.0064	1e-13	-0.0162	0.0038	2.355e-05	-0.0385	0.0237	0.1044	0.861375	0.12783
rs73729085	HDL	7	137561861	G	A	0.0511	0.0068	13.2438	-0.081	0.12	0.5	0.0342	0.0206	0.09623	0.4451	0.3749	0.2351	0.0183015	0.0671601
rs10273527	HDL	7	139036598	G	T	0.0106	0.0015	11.7994	-0.02	0.0075	0.0081	-0.0183	0.0042	1.353e-05	-0.0002	0.0273	0.993	0.703579	0.143231
rs62492368	HDL	7	150537635	A	G	0.0155	0.0013	32.0471	-0.044	0.0069	1.5e-10	-0.009	0.0039	0.02307	-0.0322	0.0249	0.1947	7.337e-06	0.999319
rs11783088	HDL	8	6620392	G	A	0.0109	0.0015	12.4336	0.0015	0.0074	0.84	-0.0031	0.0045	0.4939	-0.0244	0.0286	0.3942	0.00169053	0.00495905
rs4841132	HDL	8	9183596	A	G	0.0954	0.0021	449.894	-0.063	0.011	1.9e-08	0.0091	0.0066	0.1678	-0.0443	0.0402	0.2709	0.00596875	0.80589
rs614197	HDL	8	9788582	A	G	0.0134	0.0015	18.3837	-0.0016	0.0077	0.84	-0.0067	0.0043	0.1204	-0.0558	0.028	0.04657	0.00199265	0.00444168
rs9657541	HDL	8	10643164	T	C	0.0181	0.0016	28.9439	0.0023	0.008	0.77	0.0061	0.005	0.2216	0.0036	0.0287	0.8998	0.00513965	0.00123534
rs7459547	HDL	8	11854888	G	T	0.0021	0.0013	0.973763	-0.032	0.0065	7.9e-07	0.0009	0.0041	0.8196	-0.0085	0.0238	0.7191	0.000815803	0.00355349
rs12680202	HDL	8	12617942	A	T	0.0102	0.0015	10.9804	-0.036	0.007	4e-07	-0.0055	0.0048	0.2481	-0.0131	0.0274	0.6322	0.00358707	0.996943
rs208771	HDL	8	17800472	T	C	0.0102	0.0013	14.3676	-0.021	0.0065	0.0011	-0.0131	0.0039	0.0006772	-0.0275	0.0236	0.2433	0.230617	0.371942
rs2958557	HDL	8	19251679	T	C	0.0779	0.0084	19.7457	-0.0005	0.039	0.99	-0.0354	0.0273	0.1933	-0.0193	0.2413	0.9362	0.0169103	0.0375974
rs3208305	HDL	8	19823648	A	T	0.1053	0.0014	1230.42	-0.037	0.007	1.1e-07	-0.0443	0.0041	2.429e-27	-0.036	0.0253	0.1544	2.89608e-05	0.695579
rs147158682	HDL	8	20485546	A	G	0.0878	0.0191	5.36764	na	na	na	0.0151	0.0533	0.7763	1.2245	2.8061	0.6626	0.00972639	0.0465391
rs73221948	HDL	8	25464670	T	G	0.013	0.0017	13.6869	-0.039	0.0074	2.2e-07	-0.0103	0.0055	0.06451	-0.0013	0.0293	0.9635	0.00994116	0.999687
rs4609187	HDL	8	34519519	G	A	0.0093	0.0014	10.5119	-0.024	0.0072	0.00088	-0.0016	0.0041	0.7005	-0.0461	0.0262	0.07772	0.00171057	0.508296
rs16885613	HDL	8	36848357	C	T	0.011	0.0015	12.6488	-0.033	0.0086	9.9e-05	-0.0137	0.0045	0.00201	-0.0308	0.0298	0.302	0.118317	0.910306
rs4082204	HDL	8	38328902	A	G	0.0097	0.0013	13.0679	-0.015	0.0065	0.022	-0.0111	0.0038	0.003938	-0.039	0.0235	0.09706	0.0866313	0.0419431
rs1949102	HDL	8	60654261	A	G	0.0106	0.0015	11.7994	-0.011	0.0072	0.14	0.0017	0.0046	0.7176	-0.0118	0.0262	0.6512	0.00182993	0.0179445
rs6994609	HDL	8	64799004	T	G	0.0103	0.0013	14.6351	-0.022	0.0063	0.00059	-0.0116	0.0038	0.002408	0.0006	0.0231	0.9794	0.0587422	0.716068
rs35395175	HDL	8	71196058	A	C	0.0248	0.0019	38.2119	-0.014	0.011	0.2	-0.0206	0.0055	0.000176	-0.0179	0.0382	0.6389	0.683741	0.0145723
rs28471687	HDL	8	72459582	G	A	0.0209	0.0023	18.992	-0.05	0.012	4e-05	-0.0146	0.0068	0.03313	0.0315	0.0445	0.4787	0.0310455	0.876062
rs1802539	HDL	8	103876183	G	A	0.0128	0.0016	14.9051	-0.023	0.0082	0.0043	-0.0151	0.0048	0.001894	-0.0269	0.03	0.3686	0.48032	0.193987
rs979646	HDL	8	106385695	A	C	0.0097	0.0012	15.2005	-0.0056	0.0064	0.38	0.0009	0.0037	0.8065	0.0185	0.0231	0.4228	0.000107763	0.0063283
rs3808460	HDL	8	116597635	T	C	0.0325	0.0013	137.214	-0.033	0.0064	3.5e-07	-0.0007	0.0039	0.8626	-0.0027	0.0235	0.9083	0.00150719	0.751468
rs10955992	HDL	8	121872464	C	A	0.0195	0.0013	50.1342	0.017	0.0067	0.01	0.0041	0.004	0.3031	-0.0226	0.0247	0.36	0.00307322	0.093202
rs2980888	HDL	8	126507308	T	C	0.04	0.0014	178.818	-0.0083	0.0069	0.23	-0.0406	0.0041	4.222e-23	-0.1153	0.0251	4.39e-06	2.66489e-05	0.0101779
rs58301047	HDL	8	144296480	G	C	0.0256	0.0016	56.8936	0.014	0.0083	0.09	0.0033	0.0047	0.4829	-0.0002	0.0298	0.994	0.00223271	0.0235548
[truncated: 288 more rows]
