# Supplementary material for: Implicating genes, pleiotropy, and sexual dimorphism at blood lipid loci through multi-ancestry meta-analysis
Source: Genome Biol. 2022 Dec 27;23:268. doi: 10.1186/s13059-022-02837-1 (PMC9793579; doi:10.1186/s13059-022-02837-1)
Supplement: Supplementary file 9 — Additional file 9: Figure S3. Lipid traits – tissue/cell type associations estimated by DESE according to GTEx gene-level and GTEx transcript-level selective expression. [file 13059_2022_2837_MOESM9_ESM.pdf]

A

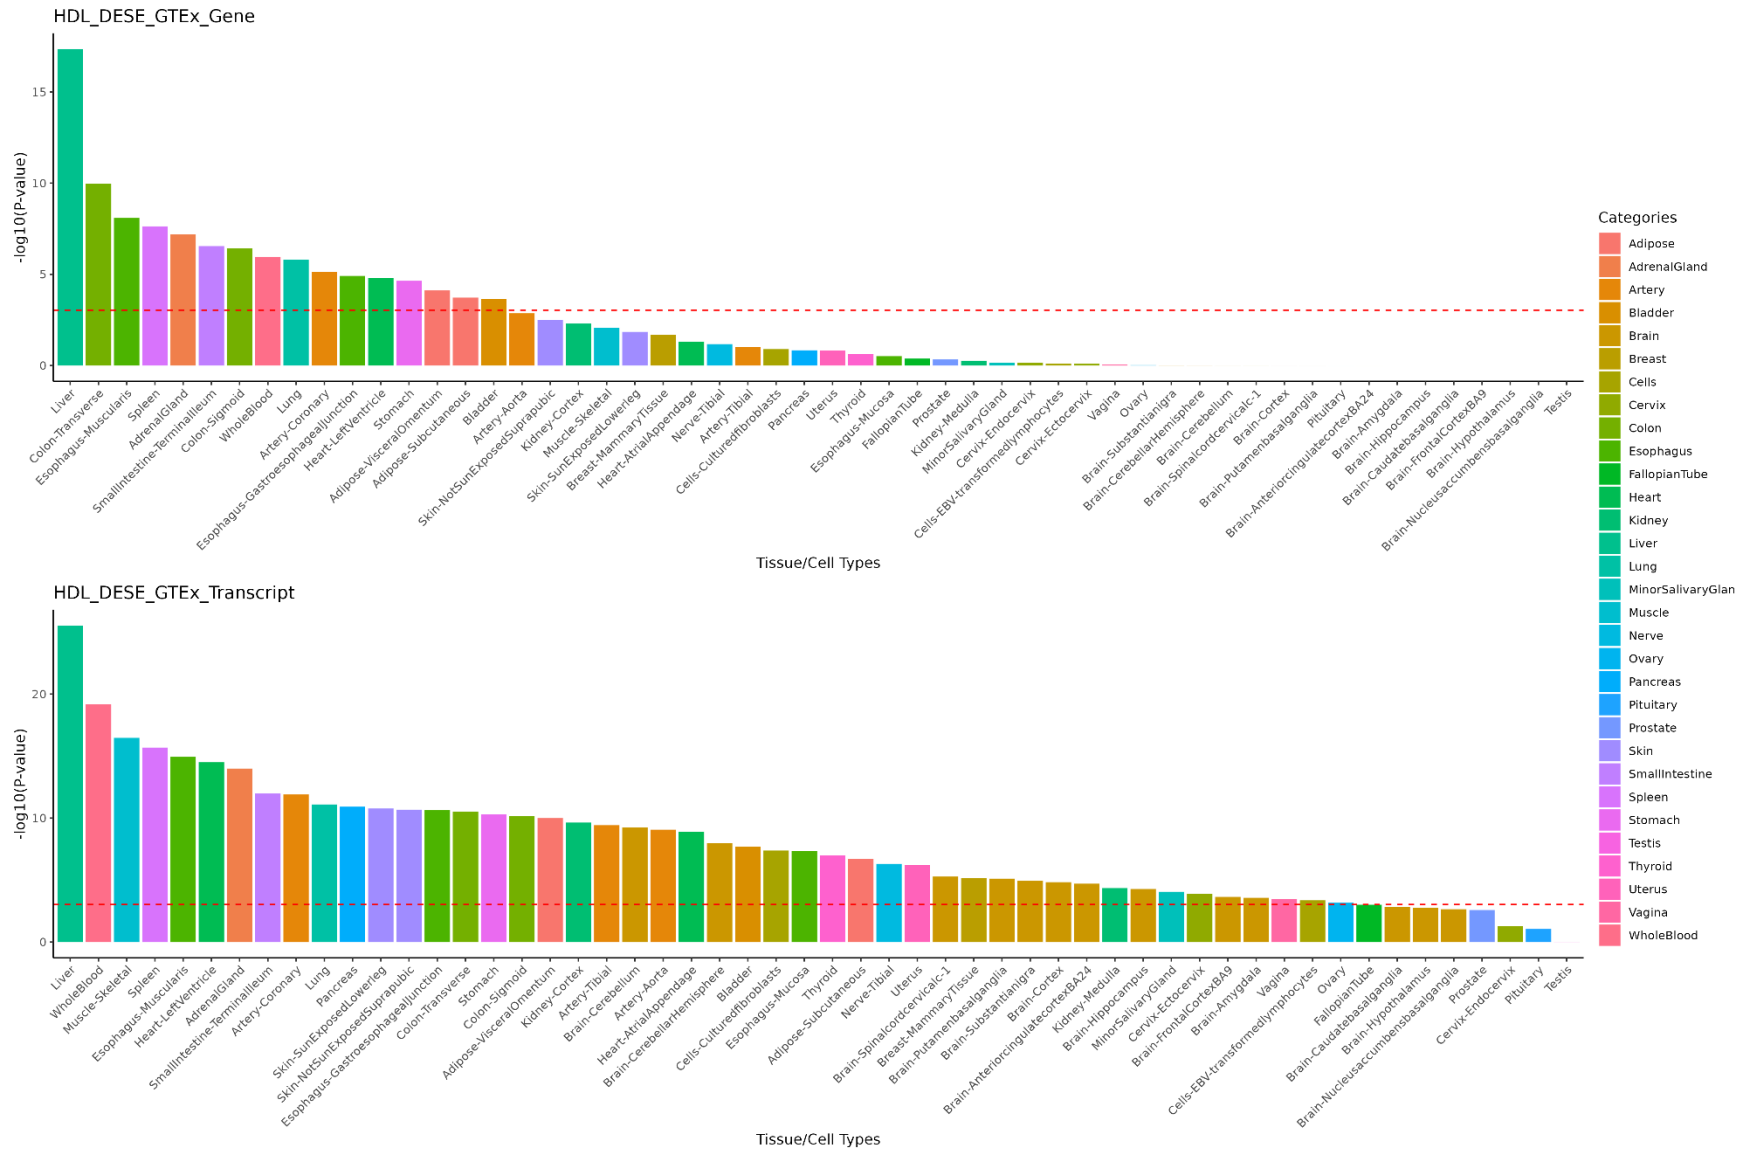

B

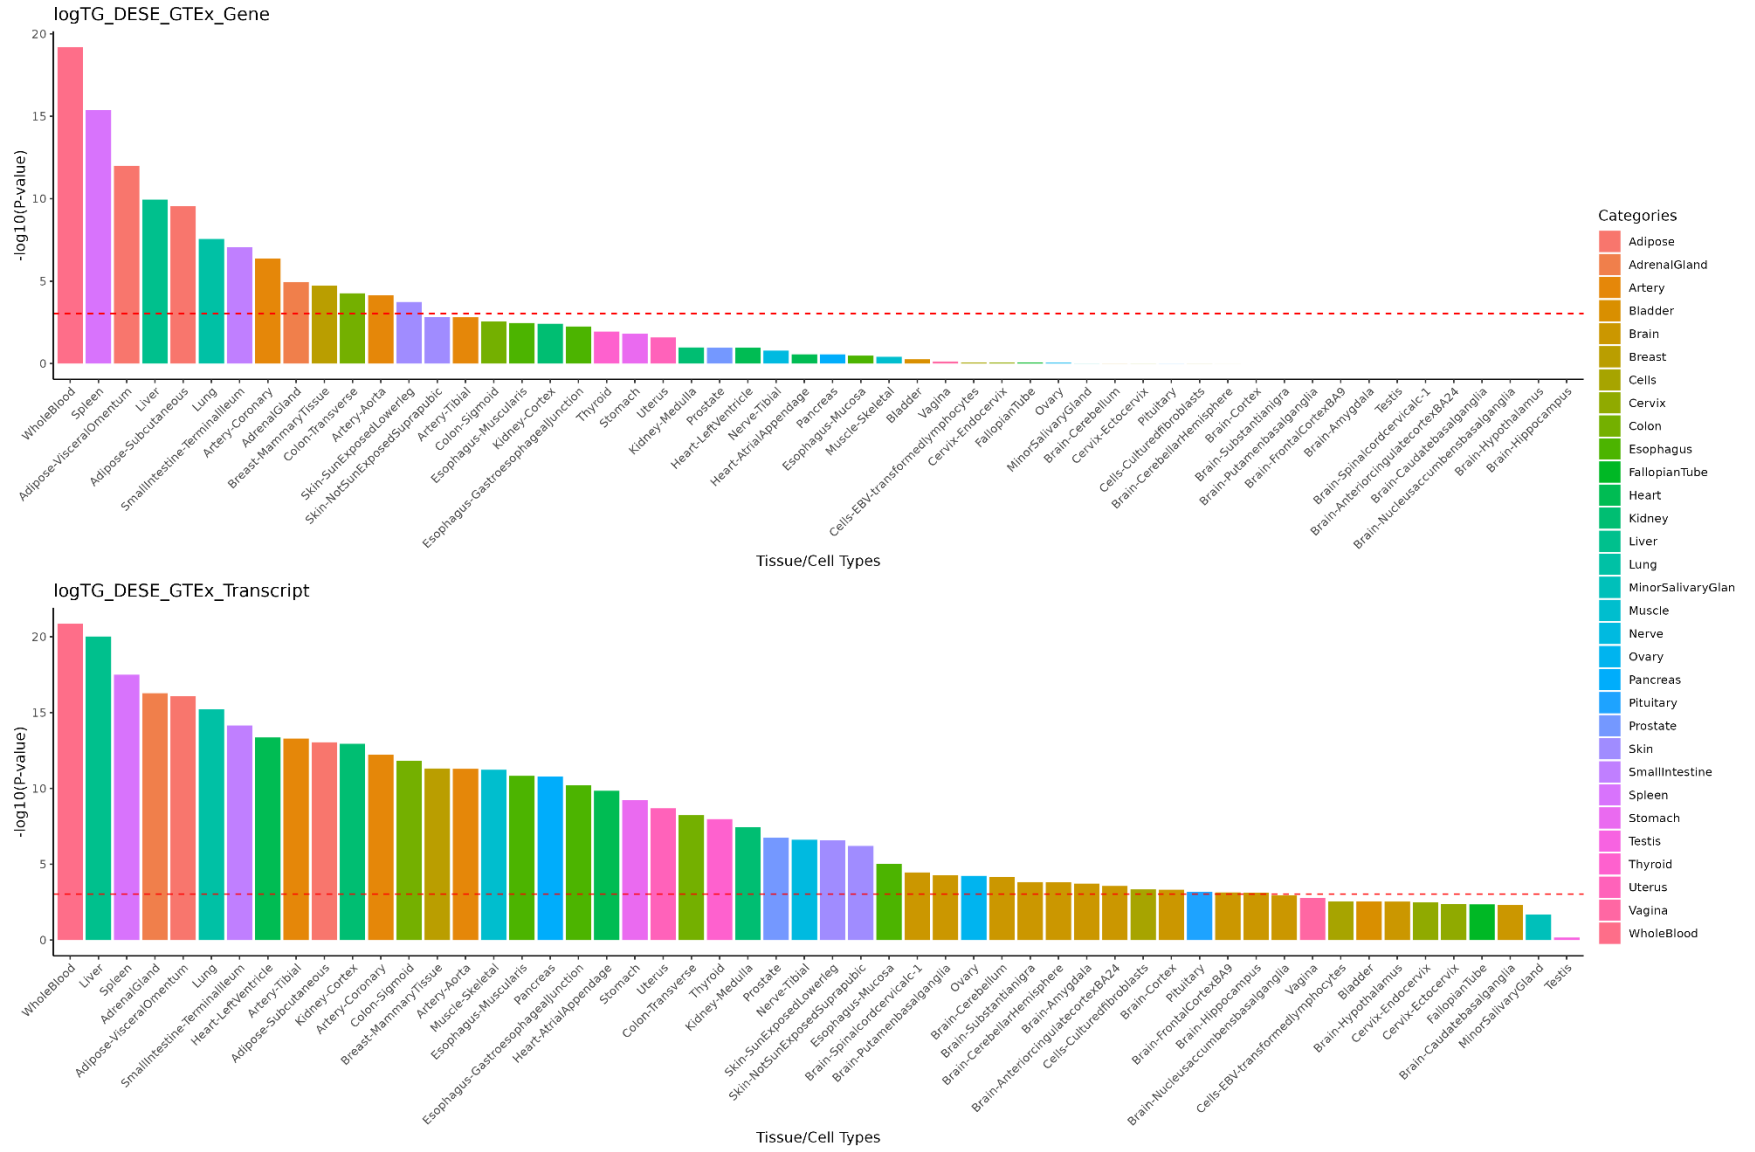

C

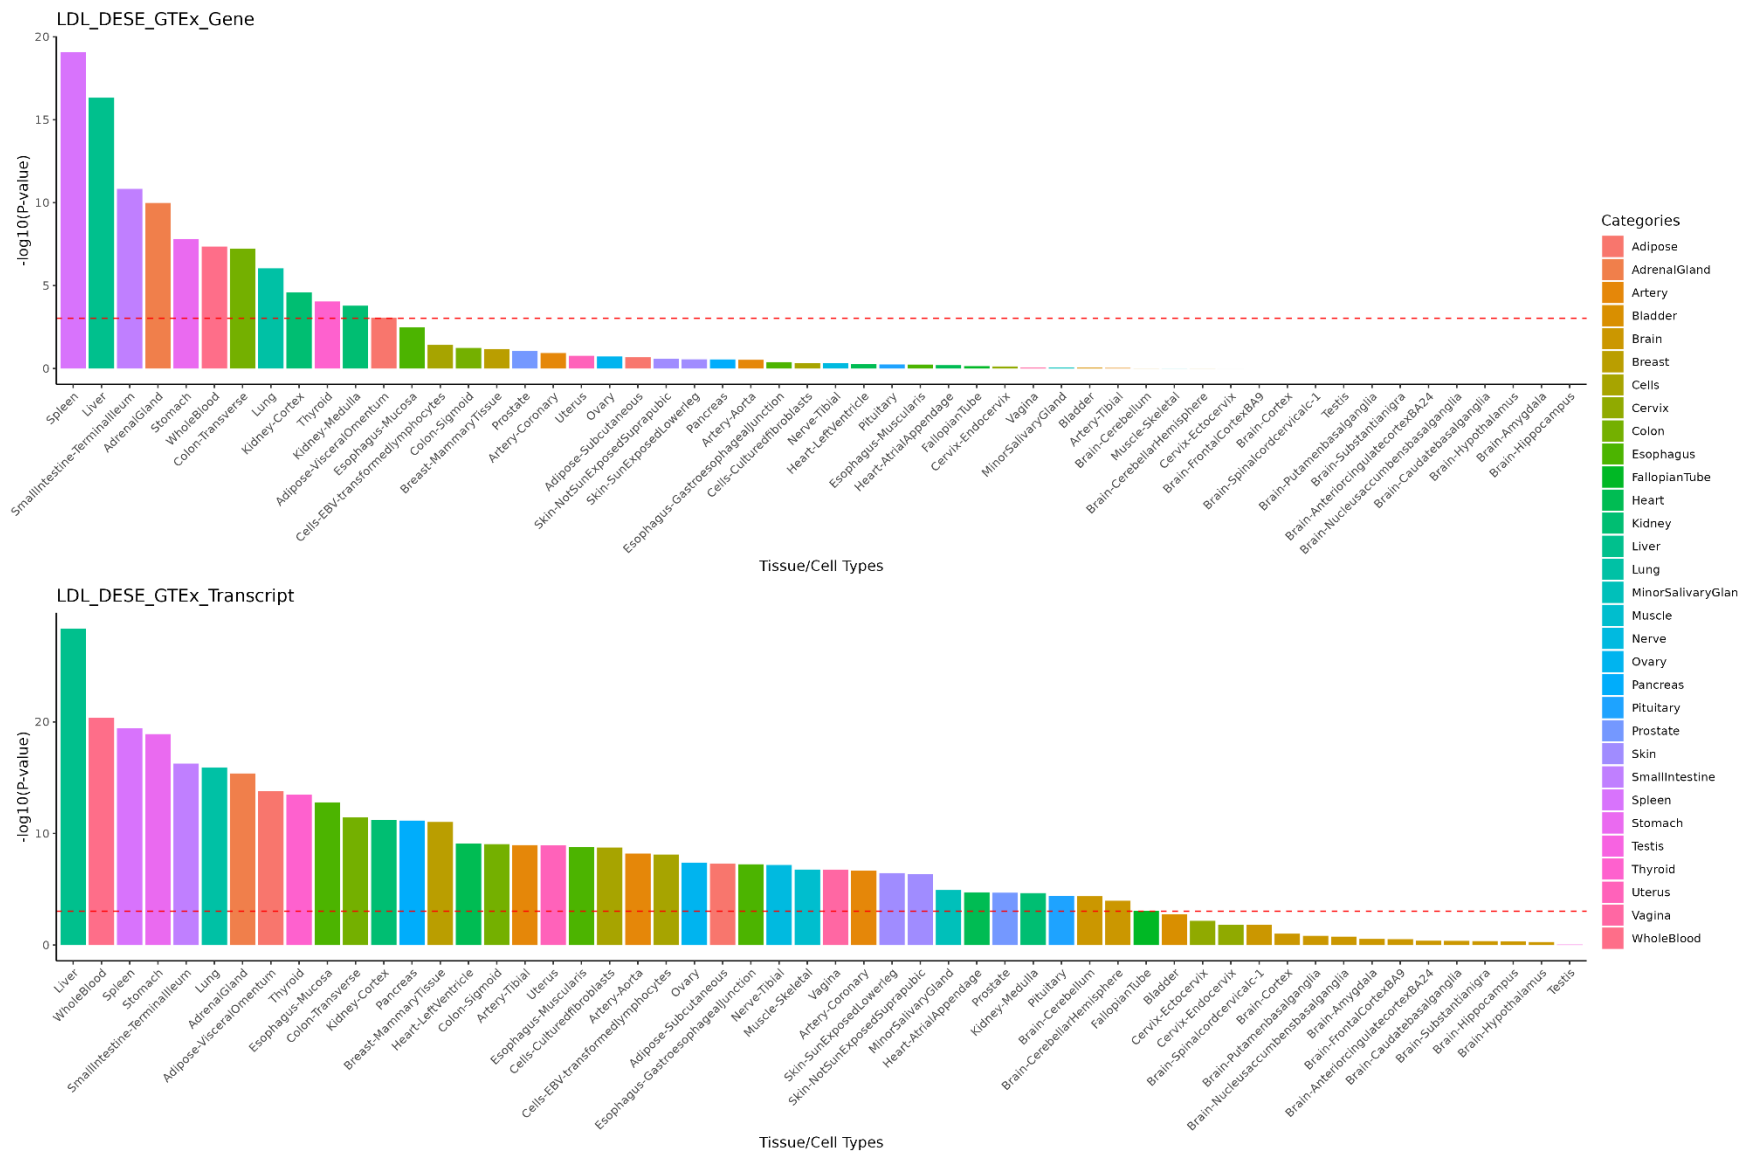

D

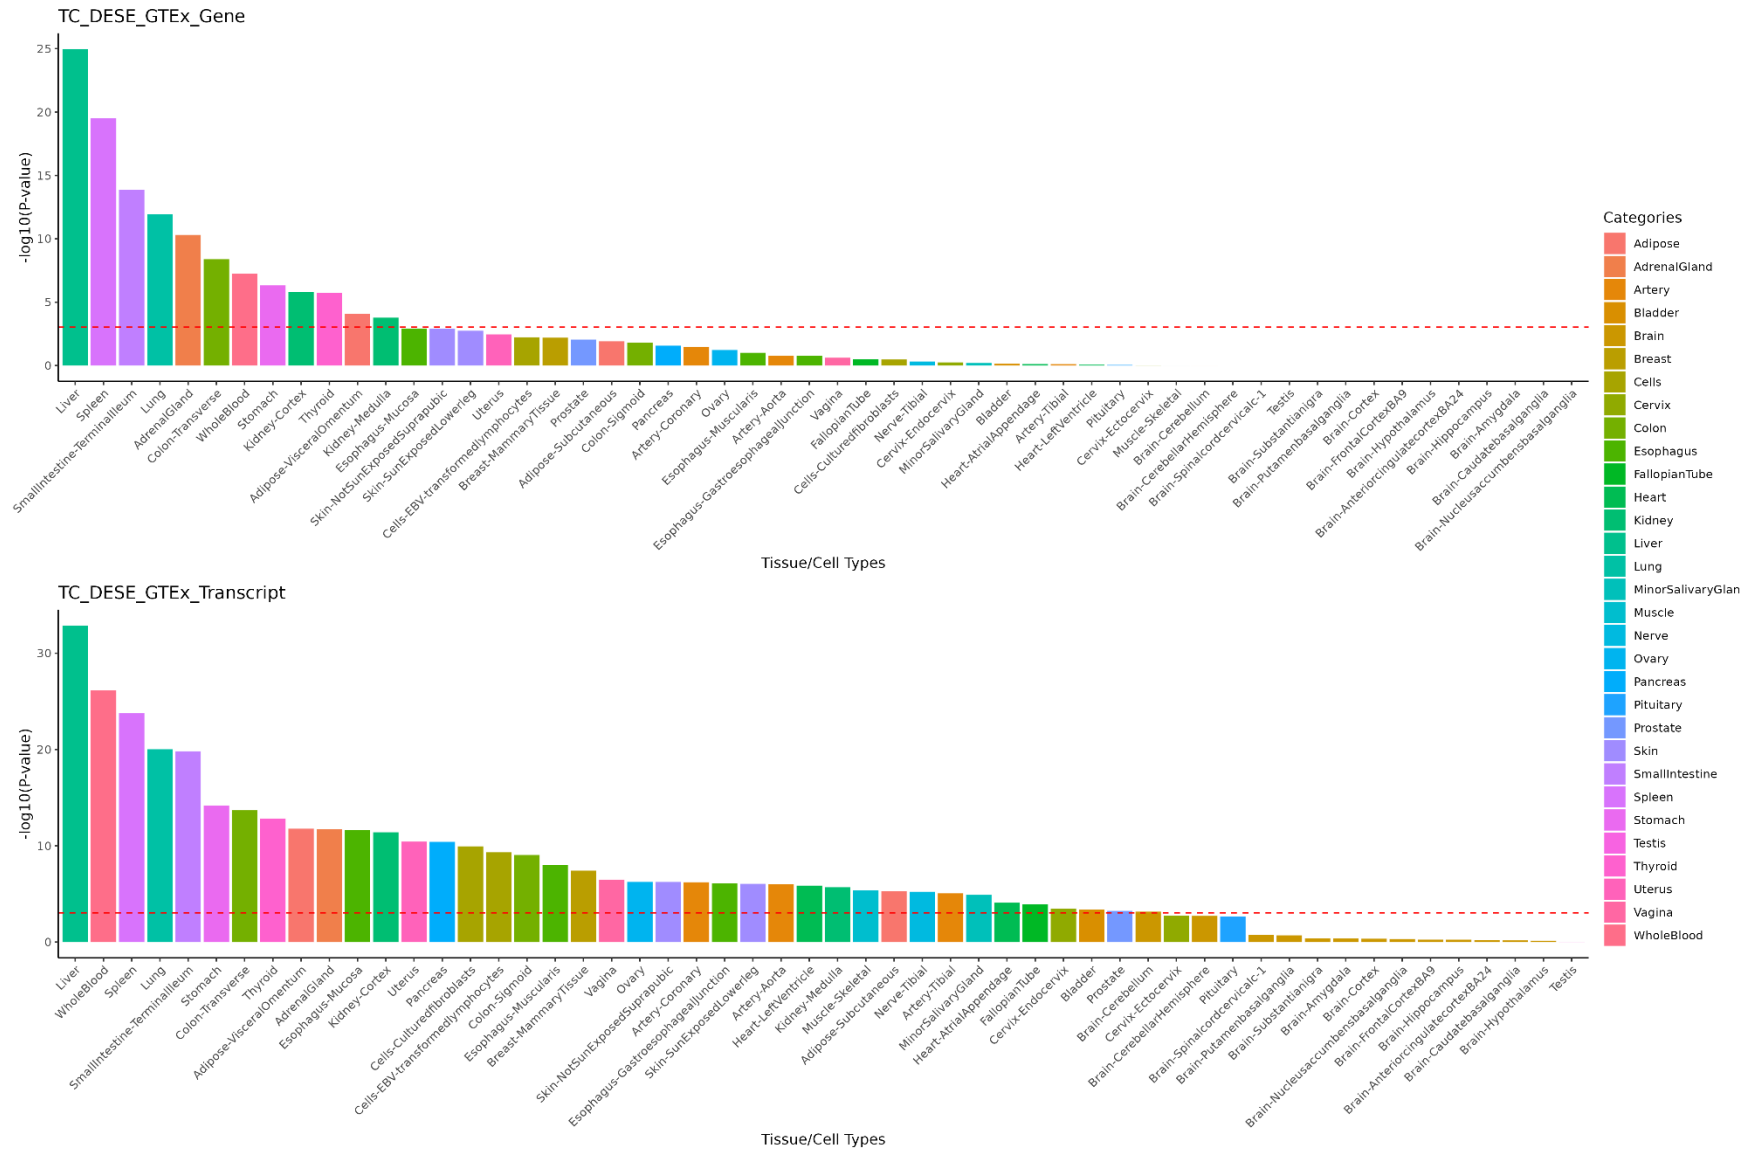

E

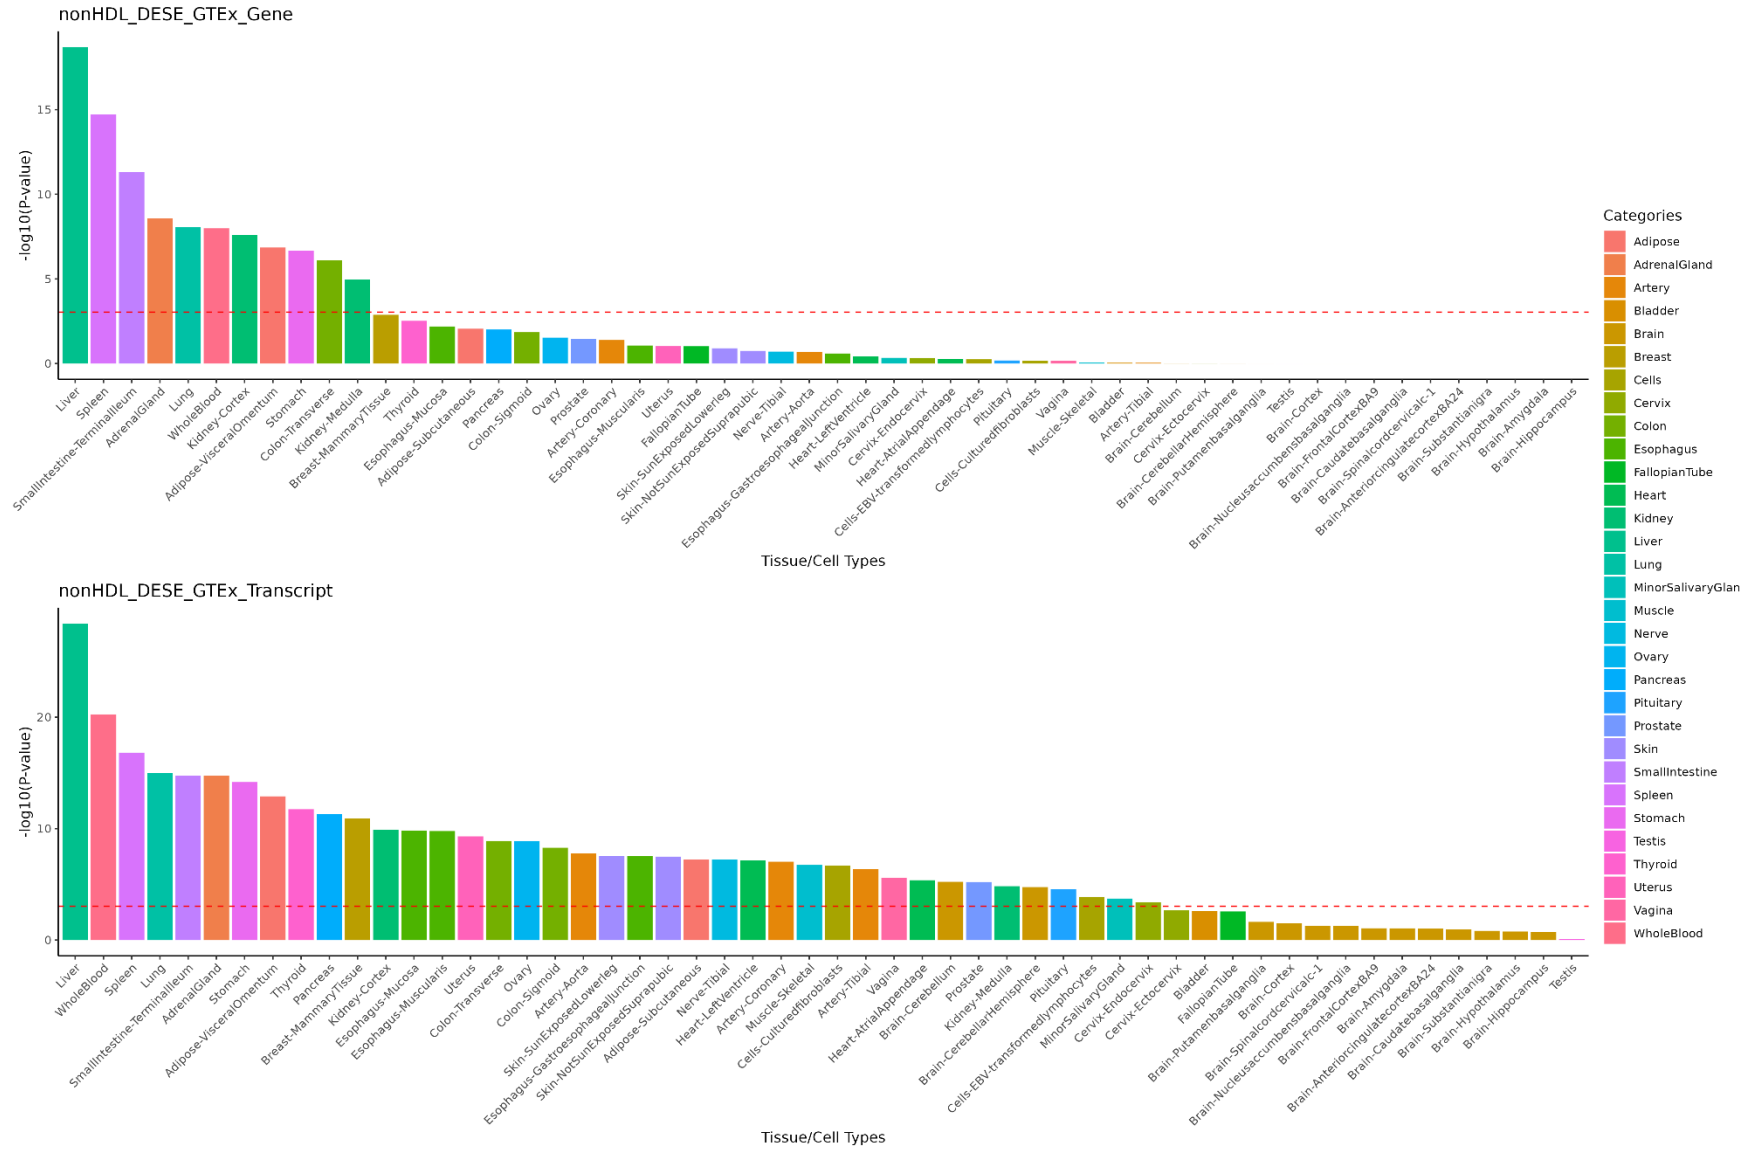

**Figure S3. Lipid traits – tissue/cell type associations estimated by DESE according to GTEx gene-level and GTEx transcript-level selective expression.**

We performed phenotype-tissue association tests in five lipid traits: (A) HDL-C, (B) TG, (C) LDL-C, (D) TC, and (E) nonHDL-C with 54 GTEx tissues. For each lipid traits, the upper panel showed the estimated driver tissues according to GTEx gene-level selective expression and the bottom panel showed estimated driver tissues according to GTEx transcript-level selective expression. The tissues were ranked by their association significance ( $-\log_{10}(\text{P-value})$ ) with each lipid traits. The red horizontal line denoted the significance threshold using a Bonferroni correction.
