# Supplementary material for: Implicating genes, pleiotropy, and sexual dimorphism at blood lipid loci through multi-ancestry meta-analysis
Source: Genome Biol. 2022 Dec 27;23:268. doi: 10.1186/s13059-022-02837-1 (PMC9793579; doi:10.1186/s13059-022-02837-1)
Supplement: Supplementary file 10 — Additional file 10: Table S7. DESE phenotype-tissue association results using both GTEx gene-level and transcript-level selective expression. [file 13059_2022_2837_MOESM10_ESM.xlsx]

## Sheet: Sheet1
Table S7. DESE phenotype-tissue association results using both GTEx gene-level and transcript-level selective expression
	GTEx.Gene.Assoc.tissue.celltype					GTEx.Transcript.Assoc.tissue.celltype
TissueName	Pvalue_HDL	Pvalue_logTG	Pvalue_LDL	Pvalue_TC	Pvalue_nonHDL	Pvalue_HDL	Pvalue_logTG	Pvalue_LDL	Pvalue_TC	Pvalue_nonHDL
Adipose-Subcutaneous	0.00019	2.8e-10	0.21	0.012	0.0088	1.9e-07	9.2e-14	5e-08	5.2e-06	5.9e-08
Adipose-VisceralOmentum	7.6e-05	1e-12	0.00088	8.3e-05	1.4e-07	1e-10	8.4e-17	1.6e-14	1.7e-12	1.3e-13
AdrenalGland	6.3e-08	1.1e-05	1e-10	4.9e-11	2.6e-09	1e-14	5.3e-17	4.1e-16	1.8e-12	1.8e-15
Artery-Aorta	0.0014	7.3e-05	0.3	0.16	0.2	8.7e-10	5.2e-12	6.3e-09	9.7e-07	1.6e-08
Artery-Coronary	7.4e-06	4.3e-07	0.12	0.034	0.04	1.2e-12	6.1e-13	2.1e-07	6.2e-07	9.3e-08
Artery-Tibial	0.097	0.0016	0.92	0.77	0.9	3.8e-10	5.2e-14	1.1e-09	8.7e-06	4.3e-07
Bladder	0.00022	0.55	0.88	0.74	0.89	2e-08	0.0028	0.0017	0.00041	0.0025
Brain-Amygdala	1	1	1	1	1	0.00027	0.00019	0.28	0.43	0.089
Brain-AnteriorcingulatecortexBA24	1	1	1	1	1	2e-05	0.00027	0.41	0.64	0.097
Brain-Caudatebasalganglia	1	1	1	1	1	0.0015	0.005	0.42	0.68	0.11
Brain-CerebellarHemisphere	1	1	0.99	1	1	1e-08	0.00016	0.00011	0.0019	1.7e-05
Brain-Cerebellum	1	0.99	0.98	1	0.98	5.8e-10	7.2e-05	4.1e-05	0.0007	6e-06
Brain-Cortex	1	1	1	1	1	1.5e-05	0.00047	0.098	0.45	0.03
Brain-FrontalCortexBA9	1	1	1	1	1	0.00023	0.00072	0.3	0.56	0.087
Brain-Hippocampus	1	1	1	1	1	5.3e-05	0.00075	0.45	0.56	0.19
Brain-Hypothalamus	1	1	1	1	1	0.0017	0.0029	0.54	0.72	0.17
Brain-Nucleusaccumbensbasalganglia	1	1	1	1	1	0.0022	0.0011	0.17	0.49	0.052
Brain-Putamenbasalganglia	1	1	1	1	1	7.7e-06	5.2e-05	0.15	0.2	0.023
Brain-Spinalcordcervicalc-1	1	1	1	1	1	5.3e-06	3.4e-05	0.015	0.17	0.05
Brain-Substantianigra	0.98	1	1	1	1	1.2e-05	0.00015	0.44	0.41	0.15
Breast-MammaryTissue	0.021	1.8e-05	0.066	0.0064	0.0013	6.8e-06	4.8e-12	9.4e-12	3.9e-08	1.3e-11
Cells-Culturedfibroblasts	0.12	0.99	0.48	0.33	0.7	4.2e-08	0.00046	1.8e-09	1.2e-10	2e-07
Cells-EBV-transformedlymphocytes	0.8	0.84	0.037	0.0059	0.56	0.00042	0.0028	7.7e-09	4.7e-10	0.00013
Cervix-Ectocervix	0.81	0.99	1	0.98	0.99	0.00013	0.0041	0.0067	0.0017	0.0021
Cervix-Endocervix	0.71	0.84	0.75	0.56	0.47	0.053	0.0034	0.015	0.00034	0.00042
Colon-Sigmoid	3.8e-07	0.0028	0.057	0.016	0.014	6.6e-11	1.5e-12	8.9e-10	9.1e-10	5.2e-09
Colon-Transverse	1.1e-10	5.5e-05	5.9e-08	4.1e-09	7.9e-07	3e-11	5.8e-09	3.6e-12	2e-14	1.3e-09
Esophagus-GastroesophagealJunction	1.2e-05	0.0056	0.41	0.17	0.25	2.3e-11	6.1e-11	5.7e-08	7.6e-07	2.9e-08
Esophagus-Mucosa	0.3	0.33	0.0033	0.0012	0.0064	4.6e-08	9.7e-06	1.6e-13	2.4e-12	1.5e-10
Esophagus-Muscularis	8.1e-09	0.0035	0.57	0.099	0.086	1.2e-15	1.5e-11	1.7e-09	9.8e-09	1.6e-10
FallopianTube	0.41	0.87	0.71	0.31	0.095	0.00098	0.0044	0.00087	0.00012	0.0027
Heart-AtrialAppendage	0.048	0.28	0.62	0.76	0.53	1.3e-09	1.4e-10	1.9e-05	8.1e-05	4.2e-06
Heart-LeftVentricle	1.6e-05	0.11	0.54	0.85	0.38	3.1e-15	4.4e-14	8e-10	1.4e-06	7.2e-08
Kidney-Cortex	0.005	0.0038	2.6e-05	1.6e-06	2.5e-08	2.3e-10	1.1e-13	6.1e-12	4e-12	1.2e-10
Kidney-Medulla	0.54	0.11	0.00016	0.00017	1.1e-05	4.4e-05	3.6e-08	2.2e-05	2e-06	1.5e-05
Liver	4.5e-18	1.1e-10	4.8e-17	1.1e-25	2e-19	3e-26	9.7e-21	4.3e-29	1.4e-33	3.9e-29
Lung	1.5e-06	2.8e-08	9.1e-07	1.2e-12	8.8e-09	8e-12	6e-16	1.2e-16	9.5e-21	1e-15
MinorSalivaryGland	0.71	0.96	0.84	0.63	0.46	8.9e-05	0.021	1.2e-05	1.3e-05	0.00019
Muscle-Skeletal	0.0087	0.39	0.99	1	0.86	3.4e-17	5.9e-12	1.7e-07	4.1e-06	1.8e-07
Nerve-Tibial	0.066	0.16	0.48	0.48	0.2	4.9e-07	2.5e-07	6.6e-08	6e-06	5.9e-08
Ovary	0.95	0.89	0.19	0.059	0.03	0.00067	5.8e-05	4.1e-08	5.7e-07	1.3e-09
Pancreas	0.15	0.28	0.28	0.027	0.0099	1.2e-11	1.6e-11	7e-12	4e-11	4.7e-12
Pituitary	1	0.99	0.57	0.9	0.66	0.087	0.00064	3.9e-05	0.0023	2.8e-05
Prostate	0.46	0.11	0.087	0.009	0.035	0.0026	1.8e-07	2e-05	0.00058	6.2e-06
Skin-NotSunExposedSuprapubic	0.0031	0.0015	0.26	0.0012	0.18	2.1e-11	6.2e-07	4.4e-07	5.7e-07	3.3e-08
Skin-SunExposedLowerleg	0.014	0.00018	0.28	0.0018	0.13	1.7e-11	2.6e-07	3.4e-07	9e-07	2.9e-08
SmallIntestine-TerminalIleum	2.8e-07	8.5e-08	1.5e-11	1.3e-14	4.9e-12	1e-12	7.1e-15	5.4e-17	1.6e-20	1.7e-15
Spleen	2.3e-08	4.3e-16	8.3e-20	3.1e-20	2e-15	2.1e-16	3.2e-18	3.8e-20	1.7e-24	1.5e-17
Stomach	2.3e-05	0.015	1.6e-08	4.7e-07	2.1e-07	5e-11	6e-10	1.2e-19	6.7e-15	6.6e-15
Testis	1	1	1	1	1	0.96	0.68	0.89	0.92	0.79
Thyroid	0.24	0.011	8.9e-05	1.8e-06	0.003	1e-07	1.1e-08	3.4e-14	1.5e-13	1.8e-12
Uterus	0.15	0.026	0.17	0.0034	0.093	6.2e-07	2e-09	1.1e-09	3.7e-11	4.9e-10
Vagina	0.87	0.75	0.84	0.25	0.7	0.00034	0.0016	1.7e-07	3.2e-07	2.5e-06
WholeBlood	1.1e-06	6.4e-20	4.4e-08	5.8e-08	1e-08	6.8e-20	1.4e-21	4.3e-21	7.5e-27	5.7e-21
