# Supplementary material for: Implicating genes, pleiotropy, and sexual dimorphism at blood lipid loci through multi-ancestry meta-analysis
Source: Genome Biol. 2022 Dec 27;23:268. doi: 10.1186/s13059-022-02837-1 (PMC9793579; doi:10.1186/s13059-022-02837-1)
Supplement: Supplementary file 12 — Additional file 12: Table S8. PheWAS UKB-MVP meta-analysis results for each lipid PGS. [file 13059_2022_2837_MOESM12_ESM.xlsx]

## Sheet: Sheet1
Table S8. PheWAS UKB-MVP meta-analysis results for each lipid PGS
phenotype	group	beta	OR	SE	p	type	n_total	n_cases	n_controls	k_studies	tau2	I2.percent	Q	Q.df	Q.p	lipid_trait_PGS
Mixed hyperlipidemia	endocrine/metabolic	0.450318	1.56881	0.013404	1.97e-247	logistic	437271	10712	426559	2	0	0	0.648878	1	0.420514	LDL
Direct_bilirubin	Biomarkers & Measurements	-0.0449	NA	0.001433	2.06e-215	linear	342100	NA	NA	2	0.038437	90.5265	10.5557	1	0.001158	LDL
Coronary atherosclerosis	circulatory system	0.165109	1.17952	0.005299	3.99e-213	logistic	470828	45025	425803	2	0.000179	71.9122	3.56026	1	0.059178	LDL
Other chronic ischemic heart disease, unspecified	circulatory system	0.151389	1.16345	0.005981	2.34e-141	logistic	464642	33149	431493	2	0.00027	73.2577	3.73939	1	0.053144	LDL
Angina pectoris	circulatory system	0.153581	1.166	0.006536	4.26e-122	logistic	457979	25846	432133	2	0	0	0.318427	1	0.572555	LDL
Myocardial infarction	circulatory system	0.154645	1.16724	0.007334	1.08e-98	logistic	459336	20414	438922	2	0.000476	72.3292	3.61392	1	0.057298	LDL
Haemoglobin_concentration	Biomarkers & Measurements	-0.02208	NA	0.001561	1.92e-45	linear	416091	NA	NA	2	0.124685	83.4403	6.03875	1	0.013995	LDL
Unstable angina (intermediate coronary syndrome)	circulatory system	0.163416	1.17753	0.011643	9.45e-45	logistic	456664	7651	449013	2	8.63e-05	14.7359	1.17283	1	0.278821	LDL
Alzheimer's disease	mental disorders	0.285925	1.33099	0.020434	1.74e-44	logistic	465784	2446	463338	2	0.010102	83.4612	6.04638	1	0.013935	LDL
Dementias	mental disorders	0.20182	1.22363	0.014441	2.19e-44	logistic	466444	4961	461483	2	0.007707	91.8022	12.1984	1	0.000478	LDL
CRP	Biomarkers & Measurements	-0.09415	NA	0.00696	1.08e-41	linear	392203	NA	NA	2	0.020273	82.9668	5.87088	1	0.015393	LDL
Haematocrit_percentage	Biomarkers & Measurements	-0.05981	NA	0.004591	8.66e-39	linear	416093	NA	NA	2	0.147025	86.023	7.1546	1	0.007477	LDL
Abdominal aortic aneurysm	circulatory system	0.201794	1.2236	0.016599	5.26e-34	logistic	466749	3854	462895	2	0	0	0.536949	1	0.4637	LDL
Nonrheumatic aortic valve disorders	circulatory system	0.135688	1.14532	0.011541	6.48e-32	logistic	471842	7855	463987	2	0	0	0.317337	1	0.573212	LDL
Calcium	Biomarkers & Measurements	0.001646	NA	0.000156	5.21e-26	linear	358936	NA	NA	2	0.08183	80.3009	5.07639	1	0.024254	LDL
Mean_corpuscular_volume	Biomarkers & Measurements	-0.06879	NA	0.006891	1.8e-23	linear	416061	NA	NA	2	0.110933	83.8447	6.18993	1	0.012848	LDL
Mean_corpuscular_haemoglobin	Biomarkers & Measurements	-0.02709	NA	0.002859	2.68e-21	linear	416065	NA	NA	2	0.095623	81.7186	5.47004	1	0.019345	LDL
HbA1c	Biomarkers & Measurements	0.095088	NA	0.010091	4.37e-21	linear	404379	NA	NA	2	0	0	0.381784	1	0.53665	LDL
Cholelithiasis	digestive	-0.06526	0.936827	0.007041	1.9e-20	logistic	475387	21337	454050	2	0.001291	78.8909	4.73729	1	0.029515	LDL
Peripheral vascular disease, unspecified	circulatory system	0.098804	1.10385	0.010768	4.49e-20	logistic	469356	9278	460078	2	0.000676	74.2841	3.88865	1	0.048614	LDL
Occlusion and stenosis of precerebral arteries	circulatory system	0.123707	1.13168	0.01438	7.78e-18	logistic	469755	5134	464621	2	0	0	0.011585	1	0.914287	LDL
Disorders of iron metabolism	hematopoietic	-0.19998	0.818747	0.025991	1.43e-14	logistic	473975	1487	472488	2	0.015295	89.2592	9.31031	1	0.002279	LDL
Cholelithiasis with other cholecystitis	digestive	-0.08121	0.922003	0.011043	1.93e-13	logistic	474079	8384	465695	2	0.002995	64.9054	2.84944	1	0.091406	LDL
Other aneurysm	circulatory system	0.115834	1.12281	0.015866	2.86e-13	logistic	465022	4042	460980	2	0.013515	72.95	3.69686	1	0.054515	LDL
Aortic aneurysm	circulatory system	0.114668	1.1215	0.015931	6.11e-13	logistic	465787	4020	461767	2	0.005491	87.8707	8.2445	1	0.004088	LDL
Other acute and subacute forms of ischemic heart disease	circulatory system	0.13349	1.14281	0.018721	1e-12	logistic	455460	2885	452575	2	0	0	0.023495	1	0.878176	LDL
Heart failure NOS	circulatory system	0.074548	1.0774	0.010841	6.12e-12	logistic	468348	8853	459495	2	0.00073	67.6238	3.08869	1	0.078838	LDL
Monocyte_count	Biomarkers & Measurements	-0.00224	NA	0.000343	6.49e-11	linear	411412	NA	NA	2	0.01698	47.8847	1.91882	1	0.165987	LDL
BMI	Biomarkers & Measurements	-0.04733	NA	0.0073	9e-11	linear	422316	NA	NA	2	0.001147	59.94	2.49626	1	0.114117	LDL
Essential hypertension	circulatory system	0.021842	1.02208	0.003388	1.14e-10	logistic	474181	162855	311326	2	0.000139	73.3504	3.7524	1	0.052732	LDL
Hyperglyceridemia	endocrine/metabolic	0.129148	1.13786	0.021102	9.34e-10	logistic	429284	2562	426722	2	0.013984	76.6063	4.27466	1	0.038685	LDL
Hyperlipidemia	endocrine/metabolic	0.368738	1.44591	0.060523	1.11e-09	logistic	469725	100984	368741	2	0.007266	99.1788	121.777	1	2.58e-28	LDL
Atherosclerosis	circulatory system	0.12751	1.136	0.021434	2.7e-09	logistic	465186	2210	462976	2	0	0	0.503262	1	0.47807	LDL
Atherosclerosis of the extremities	circulatory system	0.128998	1.13769	0.021845	3.53e-09	logistic	465527	2134	463393	2	0	0	0.000496	1	0.982228	LDL
Total_bilirubin	Biomarkers & Measurements	-0.03958	NA	0.006852	7.67e-09	linear	407264	NA	NA	2	0.070862	89.0526	9.1346	1	0.002508	LDL
Aspartate_aminotransferase	Biomarkers & Measurements	0.094696	NA	0.016492	9.36e-09	linear	407225	NA	NA	2	0.047221	83.8726	6.20061	1	0.012771	LDL
Red_blood_cell_erythrocyte_count	Biomarkers & Measurements	-0.00319	NA	0.000558	1.04e-08	linear	415892	NA	NA	2	0.072618	77.6438	4.47302	1	0.034434	LDL
Stricture of artery	circulatory system	0.146769	1.15809	0.025669	1.08e-08	logistic	465026	1530	463496	2	0	0	0.259621	1	0.610381	LDL
Cerebrovascular disease	circulatory system	0.044079	1.04506	0.008237	8.74e-08	logistic	467783	15578	452205	2	0	0	0.096137	1	0.756515	LDL
Iron deficiency anemias, unspecified or not due to blood loss	hematopoietic	0.039999	1.04081	0.007545	1.15e-07	logistic	464702	18480	446222	2	0	0	0.288414	1	0.591239	LDL
Other specified cardiac dysrhythmias	circulatory system	0.051456	1.0528	0.010077	3.28e-07	logistic	454307	10576	443731	2	0.000354	62.0032	2.6318	1	0.104743	LDL
Neutrophill_count	Biomarkers & Measurements	-0.01069	NA	0.002237	1.75e-06	linear	411798	NA	NA	2	0.003473	16.23	1.19375	1	0.274575	LDL
Other anemias	hematopoietic	0.028837	1.02926	0.006071	2.03e-06	logistic	469524	29869	439655	2	3.91e-05	27.837	1.38575	1	0.239124	LDL
White_blood_cell_leukocyte_count	Biomarkers & Measurements	-0.01493	NA	0.003263	4.8e-06	linear	415038	NA	NA	2	0.036645	62.4536	2.66337	1	0.102683	LDL
Other forms of chronic heart disease	circulatory system	0.053421	1.05487	0.01184	6.42e-06	logistic	456618	7353	449265	2	0	0	0.095745	1	0.756997	LDL
Cardiac conduction disorders	circulatory system	0.039058	1.03983	0.008723	7.56e-06	logistic	450874	13864	437010	2	0	0	0.30677	1	0.579669	LDL
Cardiac pacemaker in situ	circulatory system	0.054213	1.05571	0.012179	8.53e-06	logistic	451875	7083	444792	2	0	0	0.193393	1	0.660108	LDL
Cardiac pacemaker/device in situ	circulatory system	0.057552	1.05924	0.013107	1.13e-05	logistic	450409	5966	444443	2	0	0	0.714187	1	0.398057	LDL
Heart valve replaced	circulatory system	0.071605	1.07423	0.016409	1.28e-05	logistic	470726	3808	466918	2	0.003319	81.6664	5.45447	1	0.019518	LDL
Benign neoplasm of colon	neoplasms	0.020764	1.02098	0.004841	1.8e-05	logistic	469660	50110	419550	2	0.000118	64.5918	2.8242	1	0.092853	LDL
Other disorders of arteries and arterioles	circulatory system	0.088084	1.09208	0.020583	1.87e-05	logistic	465068	2381	462687	2	0	0	0.951337	1	0.329379	LDL
Atherosclerosis of native arteries of the extremities with intermittent claudication	circulatory system	0.12338	1.13131	0.028836	1.88e-05	logistic	466020	1266	464754	2	0	0	0.661598	1	0.415996	LDL
Ventricular fibrillation and flutter	circulatory system	0.155793	1.16858	0.036493	1.96e-05	logistic	450144	756	449388	2	0	0	0.000689	1	0.979055	LDL
Arterial embolism and thrombosis of lower extremity artery	circulatory system	0.122305	1.1301	0.029156	2.73e-05	logistic	465189	1191	463998	2	0	0	0.043441	1	0.834897	LDL
Cholelithiasis with acute cholecystitis	digestive	-0.07758	0.925354	0.018974	4.34e-05	logistic	473934	2799	471135	2	0	0	0.014396	1	0.904496	LDL
Cardiomegaly	circulatory system	0.046509	1.04761	0.011394	4.46e-05	logistic	473702	7912	465790	2	0	0	0.758174	1	0.383901	LDL
Altered mental status	mental disorders	0.050925	1.05224	0.012606	5.35e-05	logistic	466284	6430	459854	2	0	0	0.414243	1	0.519824	LDL
Irritable Bowel Syndrome	digestive	-0.03783	0.962874	0.009417	5.88e-05	logistic	457368	11680	445688	2	0.000968	73.3226	3.7485	1	0.052855	LDL
Complication of internal orthopedic device	injuries & poisonings	-0.0648	0.937252	0.016288	6.93e-05	logistic	474541	3803	470738	2	0	0	0.054116	1	0.81605	LDL
Syncope and collapse	symptoms	0.029346	1.02978	0.00747	8.54e-05	logistic	475613	18816	456797	2	0.000667	77.8208	4.50873	1	0.033722	LDL
Obesity	endocrine/metabolic	-0.01996	0.980243	0.005094	8.94e-05	logistic	468207	48677	419530	2	0	0	0.783476	1	0.37608	LDL
Osteoarthritis; localized	musculoskeletal	-0.01703	0.983115	0.004393	0.000105958	logistic	455558	61920	393638	2	0.000319	78.1563	4.57797	1	0.032386	LDL
Hypotension	circulatory system	0.031613	1.03212	0.008352	0.000153643	logistic	467670	15043	452627	2	0	0	0.014979	1	0.902592	LDL
Arterial embolism and thrombosis	circulatory system	0.094384	1.09898	0.024938	0.000153891	logistic	465091	1617	463474	2	0	0	0.751495	1	0.386003	LDL
Mitral valve stenosis and aortic valve stenosis	circulatory system	0.085814	1.0896	0.022731	0.000159922	logistic	469963	1958	468005	2	0.002457	43.2985	1.76362	1	0.184173	LDL
Alanine_aminotransferase	Biomarkers & Measurements	0.081063	NA	0.021542	0.000167906	linear	409045	NA	NA	2	0.07796	89.8051	9.80879	1	0.001737	LDL
Congestive heart failure (CHF) NOS	circulatory system	0.04225	1.04316	0.011259	0.000174919	logistic	470133	8432	461701	2	0.001377	84.082	6.28219	1	0.012196	LDL
Eosinophill_percentage	Biomarkers & Measurements	0.010808	NA	0.002919	0.000213766	linear	413852	NA	NA	2	0.011213	40.453	1.67935	1	0.195011	LDL
Overweight, obesity and other hyperalimentation	endocrine/metabolic	-0.02145	0.978783	0.005923	0.000294173	logistic	450098	30706	419392	2	0	0	0.081511	1	0.77526	LDL
Neurological disorders	mental disorders	0.037779	1.0385	0.010444	0.000297671	logistic	466129	9436	456693	2	0	0	0.421612	1	0.516134	LDL
Hyposmolality and/or hyponatremia	endocrine/metabolic	0.041095	1.04195	0.011608	0.000399843	logistic	466023	7599	458424	2	0	0	0.695419	1	0.404327	LDL
Hypercholesterolemia	endocrine/metabolic	0.428415	1.53482	0.121408	0.00041757	logistic	434788	61781	373007	2	0.029343	99.535	215.074	1	1.07e-48	LDL
Circulatory disease NEC	circulatory system	0.020188	1.02039	0.00584	0.000546617	logistic	468972	32335	436637	2	0	0	0.019406	1	0.889208	LDL
Postmenopausal bleeding	genitourinary	-0.03403	0.966539	0.010012	0.000675848	logistic	411276	10559	400717	2	0	0	0.781215	1	0.37677	LDL
Celiac disease	digestive	-0.0637	0.938283	0.018805	0.000705278	logistic	455750	2836	452914	2	0.024867	88.9395	9.0412	1	0.00264	LDL
Nonrheumatic mitral valve disorders	circulatory system	0.04321	1.04416	0.012795	0.000732236	logistic	470968	6248	464720	2	0	0	0.124698	1	0.723994	LDL
Cholecystitis without cholelithiasis	digestive	-0.04965	0.951558	0.0148	0.000793353	logistic	474444	4607	469837	2	9.9e-05	10.2758	1.11453	1	0.2911	LDL
Jaundice (not of newborn)	digestive	-0.08215	0.921136	0.02465	0.00086049	logistic	465699	1653	464046	2	0.000111	3.87195	1.04028	1	0.307757	LDL
Monocyte_percentage	Biomarkers & Measurements	-0.01393	NA	0.004193	0.000891813	linear	412668	NA	NA	2	0.022409	54.4815	2.19691	1	0.138288	LDL
Precordial pain	circulatory system	0.040504	1.04133	0.012346	0.0010354	logistic	455326	6677	448649	2	0.000226	5.27295	1.05567	1	0.304206	LDL
Lymphocyte_percentage	Biomarkers & Measurements	0.037642	NA	0.011562	0.00113102	linear	412481	NA	NA	2	0	0	0.907248	1	0.340846	LDL
Fracture of neck of femur	injuries & poisonings	-0.05034	0.95091	0.015528	0.00118893	logistic	468653	4208	464445	2	0.000918	38.1675	1.61727	1	0.203473	LDL
Complications of cardiac/vascular device, implant, and graft	injuries & poisonings	0.132722	1.14193	0.041742	0.00147502	logistic	474383	599	473784	2	0.011549	72.1483	3.59045	1	0.058113	LDL
Anal and rectal conditions	digestive	0.021237	1.02146	0.006719	0.00157401	logistic	472736	23463	449273	2	0.00027	38.4082	1.62359	1	0.202592	LDL
Menopausal and postmenopausal disorders	genitourinary	-0.02918	0.971241	0.009241	0.00159056	logistic	411282	12506	398776	2	0.008082	69.7463	3.30538	1	0.069053	LDL
Hypotension NOS	circulatory system	0.030397	1.03086	0.009729	0.00178213	logistic	469349	10880	458469	2	0.000189	35.4341	1.5488	1	0.213312	LDL
Decubitus ulcer	dermatologic	0.049131	1.05036	0.015878	0.00197266	logistic	474839	4006	470833	2	0.006758	87.3571	7.90956	1	0.004917	LDL
Develomental delays and disorders	mental disorders	0.088518	1.09255	0.028652	0.00200569	logistic	474563	1224	473339	2	0	0	0.081087	1	0.77583	LDL
LDL_cholesterol	Biomarkers & Measurements	0.487414	NA	0.161057	0.00247532	linear	408383	NA	NA	2	0.048946	94.0095	16.693	1	4.39e-05	LDL
Thoracic or lumbosacral neuritis or radiculitis, unspecified	symptoms	-0.04221	0.958669	0.013954	0.00248626	logistic	467453	5520	461933	2	0	0	0.004676	1	0.94548	LDL
Hypertensive heart disease	circulatory system	0.069711	1.0722	0.023304	0.00277753	logistic	431054	2132	428922	2	0	0	0.644183	1	0.4222	LDL
GERD	digestive	-0.01443	0.985675	0.004849	0.00292243	logistic	468793	54067	414726	2	6.98e-06	11.5909	1.13111	1	0.28754	LDL
Dermatophytosis	infectious diseases	-0.07342	0.929212	0.025002	0.00331881	logistic	459006	1615	457391	2	0	0	0.001455	1	0.969573	LDL
Cerebral artery occlusion, with cerebral infarction	circulatory system	0.034643	1.03525	0.011837	0.00342699	logistic	468899	7332	461567	2	0	0	0.867133	1	0.35175	LDL
Transient cerebral ischemia	circulatory system	0.03667	1.03735	0.012611	0.00363934	logistic	470191	6580	463611	2	0	0	0.648492	1	0.420653	LDL
Type 1 diabetes	endocrine/metabolic	-0.04045	0.960358	0.014092	0.00410129	logistic	449259	5114	444145	2	0.000119	20.3382	1.25531	1	0.262541	LDL
Hypertensive heart and/or renal disease	circulatory system	0.060362	1.06222	0.02109	0.00420822	logistic	429521	2275	427246	2	0	0	0.002578	1	0.959505	LDL
Glucose	Biomarkers & Measurements	-0.00572	NA	0.00201	0.00441059	linear	357420	NA	NA	2	0	0	0.331665	1	0.564681	LDL
Atrial fibrillation	circulatory system	0.027209	1.02758	0.009564	0.00444283	logistic	457665	12960	444705	2	0.000334	64.5646	2.82204	1	0.092978	LDL
TC_cholesterol	Biomarkers & Measurements	0.485684	NA	0.17222	0.00480038	linear	409023	NA	NA	2	0.056672	95.3294	21.4106	1	3.71e-06	LDL
Pleurisy; pleural effusion	respiratory	0.023342	1.02362	0.008347	0.00516536	logistic	470906	15052	455854	2	0.000272	37.0554	1.5887	1	0.207512	LDL
Hallux valgus (Bunion)	musculoskeletal	-0.02848	0.971924	0.010214	0.00530153	logistic	463744	9948	453796	2	0	0	0.05308	1	0.817789	LDL
Obstructive chronic bronchitis	respiratory	-0.03111	0.969372	0.01121	0.00552421	logistic	457314	8257	449057	2	0	0	0.761317	1	0.382917	LDL
Kidney replaced by transpant	genitourinary	0.110138	1.11643	0.039706	0.00554011	logistic	462782	637	462145	2	0	0	0.983182	1	0.321414	LDL
Generalized anxiety disorder	mental disorders	-0.04565	0.955381	0.01651	0.00569654	logistic	441160	4571	436589	2	0	0	0.001052	1	0.974123	LDL
Hammer toe (acquired)	musculoskeletal	-0.03965	0.961126	0.014584	0.00655346	logistic	464241	4840	459401	2	0	0	0.428416	1	0.512767	LDL
Malignant neoplasm of rectum, rectosigmoid junction, and anus	neoplasms	0.04448	1.04548	0.016471	0.00692287	logistic	455419	3726	451693	2	0	0	0.325832	1	0.568123	LDL
Spinal stenosis of lumbar region	musculoskeletal	-0.03136	0.969124	0.011628	0.00699282	logistic	458463	7612	450851	2	0	0	0.829183	1	0.362509	LDL
Allergy/adverse effect of penicillin	injuries & poisonings	-0.01727	0.982882	0.006406	0.00702922	logistic	471490	26163	445327	2	0	0	0.36288	1	0.546911	LDL
Paroxysmal tachycardia, unspecified	circulatory system	0.036386	1.03706	0.013565	0.00731199	logistic	450150	5520	444630	2	0	0	0.060454	1	0.80578	LDL
Abnormal function study of cardiovascular system	circulatory system	0.066621	1.06889	0.024922	0.00751345	logistic	467003	1631	465372	2	4.2e-05	3.04007	1.03135	1	0.309841	LDL
Bundle branch block	circulatory system	0.038305	1.03905	0.014432	0.00795006	logistic	450152	4891	445261	2	0	0	0.607083	1	0.435888	LDL
Polycythemia vera	neoplasms	-0.09021	0.913743	0.034214	0.00837726	logistic	471566	854	470712	2	0	0	0.105409	1	0.745432	LDL
Epiphora	sense organs	-0.06768	0.934555	0.02578	0.00865279	logistic	453692	1513	452179	2	0	0	0.001122	1	0.973285	LDL
Amblyopia	sense organs	0.05786	1.05957	0.022046	0.00867825	logistic	465578	2101	463477	2	0.000315	23.2146	1.30233	1	0.253788	LDL
Functional digestive disorders	digestive	-0.0138	0.986293	0.005266	0.00876333	logistic	455946	40236	415710	2	0	0	0.491079	1	0.483447	LDL
Acquired foot deformities	musculoskeletal	-0.02213	0.978112	0.008445	0.00878235	logistic	463817	14690	449127	2	0	0	0.185158	1	0.666977	LDL
Reflux esophagitis	digestive	-0.02055	0.979655	0.007846	0.00879962	logistic	447250	16903	430347	2	0.001494	79.2422	4.81747	1	0.028173	LDL
Esophagitis, GERD and related diseases	digestive	-0.01205	0.988018	0.004603	0.00882489	logistic	446641	54900	391741	2	0.001223	66.0423	2.94484	1	0.086152	LDL
Other allied disorders of spine	musculoskeletal	-0.0945	0.909826	0.036112	0.00887215	logistic	456240	766	455474	2	0	0	0.145254	1	0.703112	LDL
Shortness of breath	respiratory	0.020201	1.02041	0.007756	0.00920043	logistic	454368	18207	436161	2	0	0	0.160328	1	0.688855	LDL
Peritoneal adhesions (postoperative) (postinfection)	digestive	-0.03215	0.968363	0.012409	0.00958013	logistic	471716	6605	465111	2	0	0	0.43973	1	0.507253	LDL
Myeloproliferative disease	neoplasms	-0.05575	0.945776	0.021578	0.00977608	logistic	476354	2161	474193	2	0	0	0.347463	1	0.555553	LDL
Premature beats	circulatory system	0.058507	1.06025	0.022649	0.00979021	logistic	450679	1980	448699	2	0	0	0.450827	1	0.501943	LDL
Chronic bronchitis	respiratory	-0.03131	0.969173	0.012201	0.010274	logistic	455579	6938	448641	2	0.006072	82.2231	5.62528	1	0.017703	LDL
Neutrophill_percentage	Biomarkers & Measurements	-0.03396	NA	0.013298	0.0106584	linear	411278	NA	NA	2	0	0	0.38478	1	0.535056	LDL
Systemic lupus erythematosus	dermatologic	-0.10337	0.90179	0.040893	0.011474	logistic	461337	597	460740	2	0	0	0.412979	1	0.520461	LDL
Bursitis	musculoskeletal	-0.05113	0.950153	0.020245	0.0115456	logistic	450823	2489	448334	2	0	0	0.062515	1	0.802564	LDL
Disorders of diaphragm	respiratory	-0.10941	0.896365	0.044242	0.0134023	logistic	475570	508	475062	2	0	0	0.005652	1	0.940074	LDL
Atrioventricular [AV] block	circulatory system	0.033023	1.03357	0.013358	0.0134282	logistic	450229	5748	444481	2	0	0	0.048633	1	0.82546	LDL
Other diseases of respiratory system, NEC	respiratory	0.01895	1.01913	0.007773	0.0147749	logistic	474246	17419	456827	2	0.002174	65.41	2.89101	1	0.089075	LDL
Barrett's esophagus	digestive	-0.02857	0.971835	0.01174	0.0149562	logistic	447583	7418	440165	2	0	0	0.721839	1	0.395541	LDL
Duodenitis	digestive	-0.02334	0.976928	0.009597	0.0150012	logistic	468741	11214	457527	2	0	0	0.192492	1	0.66085	LDL
Hypertensive chronic kidney disease	circulatory system	0.038508	1.03926	0.015853	0.0151382	logistic	432520	4987	427533	2	0	0	0.802901	1	0.370227	LDL
Glaucoma	sense organs	-0.01964	0.980548	0.008103	0.0153397	logistic	460226	16862	443364	2	0	0	0.241806	1	0.622905	LDL
Primary thrombocytopenia	hematopoietic	-0.08326	0.920109	0.03523	0.018109	logistic	465609	803	464806	2	0	0	0.523247	1	0.46946	LDL
Schizophrenia	mental disorders	0.054303	1.05581	0.022985	0.0181508	logistic	438087	1986	436101	2	0	0	0.799202	1	0.371332	LDL
Chronic Kidney Disease, Stage III	genitourinary	-0.02161	0.978621	0.009173	0.0184804	logistic	466595	12631	453964	2	0	0	0.048451	1	0.825781	LDL
Osteoarthrosis, localized, primary	musculoskeletal	-0.01647	0.983668	0.007008	0.0187868	logistic	453299	22156	431143	2	8.69e-05	39.2427	1.64589	1	0.199519	LDL
Disorders of magnesium metabolism	endocrine/metabolic	0.045496	1.04655	0.019371	0.0188423	logistic	474451	2699	471752	2	0	0	0.215452	1	0.642528	LDL
Vitamin B-complex deficiencies	endocrine/metabolic	-0.03376	0.9668	0.014378	0.0188599	logistic	463691	4997	458694	2	0	0	0.157365	1	0.691594	LDL
Other alveolar and parietoalveolar pneumonopathy	respiratory	-0.07183	0.930688	0.030838	0.0198425	logistic	469915	1047	468868	2	0.001543	35.7781	1.5571	1	0.21209	LDL
Calculus of bile duct	digestive	-0.08063	0.922531	0.035019	0.0213023	logistic	474050	815	473235	2	0	0	0.008361	1	0.927144	LDL
Abnormal heart sounds	circulatory system	0.035251	1.03588	0.015407	0.0221429	logistic	471264	4314	466950	2	0	0	0.017217	1	0.895607	LDL
Glucocorticoid deficiency	endocrine/metabolic	-0.09718	0.907391	0.042566	0.0224256	logistic	469884	551	469333	2	0	0	0.215584	1	0.642426	LDL
Acquired toe deformities	musculoskeletal	-0.02582	0.974514	0.011328	0.022662	logistic	463237	7999	455238	2	0	0	0.129608	1	0.718839	LDL
Edema	symptoms	-0.02197	0.978273	0.00971	0.0236746	logistic	472883	11556	461327	2	1.64e-05	7.88882	1.08564	1	0.297438	LDL
stress incontinence, female	genitourinary	-0.02729	0.97308	0.01209	0.0240055	logistic	413270	7084	406186	2	0	0	0.563755	1	0.452751	LDL
Diplopia and disorders of binocular vision	sense organs	-0.0477	0.953417	0.021183	0.0243269	logistic	465723	2253	463470	2	0	0	0.141642	1	0.706654	LDL
Other and unspecified disorders of the nervous system	neurological	-0.08155	0.921685	0.036276	0.0245694	logistic	465025	751	464274	2	0.002417	47.1484	1.89209	1	0.168966	LDL
Mean_corpuscular_haemoglobin_concentration	Biomarkers & Measurements	-0.0037	NA	0.001666	0.0264064	linear	415859	NA	NA	2	0.071233	77.738	4.49196	1	0.034055	LDL
Paroxysmal ventricular tachycardia	circulatory system	0.04536	1.0464	0.020554	0.0273265	logistic	450711	2402	448309	2	0	0	0.450886	1	0.501914	LDL
Hematemesis	digestive	0.039646	1.04044	0.018025	0.027839	logistic	465266	3103	462163	2	0	0	0.458164	1	0.498483	LDL
Hydrocele	genitourinary	-0.04302	0.957888	0.019561	0.0278418	logistic	439047	2652	436395	2	0	0	0.567636	1	0.4512	LDL
Pituitary hypofunction	endocrine/metabolic	-0.09645	0.908052	0.043884	0.0279553	logistic	469873	515	469358	2	0	0	0.201331	1	0.653649	LDL
Hereditary and idiopathic peripheral neuropathy	neurological	-0.0329	0.967639	0.01505	0.0288357	logistic	473457	4760	468697	2	0	0	0.029929	1	0.862651	LDL
Functional disorders of bladder	genitourinary	-0.03784	0.962869	0.017384	0.0295094	logistic	473047	3383	469664	2	0.001417	69.6808	3.29824	1	0.069354	LDL
Fasciitis	musculoskeletal	-0.02395	0.976338	0.011006	0.0295662	logistic	453399	8727	444672	2	0	0	0.315055	1	0.574595	LDL
Disorders of calcium/phosphorus metabolism	endocrine/metabolic	0.038438	1.03919	0.017761	0.0304492	logistic	473881	3196	470685	2	0.006503	75.7356	4.12127	1	0.042347	LDL
Retinal detachments and defects	sense organs	-0.04278	0.958125	0.019768	0.0304685	logistic	454333	2579	451754	2	0	0	0.804803	1	0.369661	LDL
Hypovolemia	endocrine/metabolic	0.021955	1.0222	0.010305	0.033132	logistic	466547	9694	456853	2	0.000106	24.0945	1.31743	1	0.251054	LDL
Abnormality of gait	neurological	-0.03	0.97045	0.014115	0.0335814	logistic	470483	5642	464841	2	2.95e-05	1.10715	1.0112	1	0.314617	LDL
Adjustment reaction	mental disorders	-0.02665	0.973699	0.012543	0.0335912	logistic	445745	9238	436507	2	0	0	0.177447	1	0.673576	LDL
Visual field defects	sense organs	0.051018	1.05234	0.024309	0.0358396	logistic	465733	1738	463995	2	0	0	0.265753	1	0.606195	LDL
Testicular hypofunction	endocrine/metabolic	-0.03662	0.964038	0.017522	0.0366008	logistic	468134	3388	464746	2	0	0	0.48505	1	0.486144	LDL
Dizziness and giddiness (Light-headedness and vertigo)	sense organs	0.017457	1.01761	0.008352	0.0366132	logistic	470908	15411	455497	2	0	0	0.050942	1	0.821432	LDL
Chronic Kidney Disease, Stage IV	genitourinary	0.046818	1.04793	0.022409	0.0366878	logistic	463512	2032	461480	2	0	0	0.223819	1	0.636145	LDL
Fracture of radius and ulna	injuries & poisonings	0.022104	1.02235	0.010587	0.0368113	logistic	469026	9197	459829	2	0.000295	27.9216	1.38738	1	0.238848	LDL
Opiates and related narcotics causing adverse effects in therapeutic use	injuries & poisonings	0.033662	1.03424	0.016149	0.0371195	logistic	471490	3872	467618	2	0	0	0.697275	1	0.403701	LDL
Other disorders of gallbladder	digestive	-0.03998	0.960806	0.019227	0.0375717	logistic	474106	2719	471387	2	0.000833	33.1511	1.49591	1	0.221302	LDL
Pneumonia	respiratory	0.013626	1.01372	0.006593	0.0387569	logistic	465532	24758	440774	2	0	0	0.316121	1	0.573948	LDL
Left bundle branch block	circulatory system	0.03048	1.03095	0.014779	0.0391745	logistic	450460	4642	445818	2	0.006361	82.7729	5.80481	1	0.015982	LDL
Cancer of esophagus	neoplasms	-0.05145	0.949854	0.024986	0.0394899	logistic	472864	1611	471253	2	0	0	0.063687	1	0.800761	LDL
Other disorders of thyroid	endocrine/metabolic	-0.06197	0.939915	0.030364	0.0412707	logistic	466726	1089	465637	2	0	0	0.001428	1	0.969855	LDL
Respiratory abnormalities	respiratory	-0.05409	0.947348	0.02652	0.0414	logistic	475929	1417	474512	2	0	0	0.592196	1	0.441571	LDL
Colon cancer	neoplasms	0.026082	1.02642	0.012793	0.0414744	logistic	456160	6250	449910	2	0	0	0.079017	1	0.778634	LDL
Hypermetropia	sense organs	0.024787	1.0251	0.0122	0.0421722	logistic	448385	8764	439621	2	0	0	0.429043	1	0.512459	LDL
Inflammation of eyelids	sense organs	-0.02472	0.975581	0.012187	0.0424997	logistic	462401	7239	455162	2	0	0	0.012405	1	0.911318	LDL
Spondylosis without myelopathy	musculoskeletal	-0.02136	0.978871	0.010636	0.0446462	logistic	462097	9572	452525	2	0	0	0.385414	1	0.53472	LDL
Musculoskeletal symptoms referable to limbs	symptoms	-0.05698	0.944615	0.028406	0.0448722	logistic	472387	1240	471147	2	0.00084	15.0549	1.17723	1	0.27792	LDL
Suppurative and unspecified otitis media	sense organs	-0.04033	0.960475	0.020159	0.0454448	logistic	470603	2499	468104	2	0	0	0.719904	1	0.396175	LDL
Carcinoma in situ of skin	neoplasms	0.044834	1.04585	0.02249	0.0462056	logistic	462232	2010	460222	2	0	0	0.044744	1	0.832475	LDL
Proteinuria	endocrine/metabolic	-0.04905	0.952136	0.024795	0.0479109	logistic	475739	1643	474096	2	0	0	0.144857	1	0.703499	LDL
Diaphragmatic hernia	digestive	-0.00996	0.99009	0.005044	0.048342	logistic	467736	44255	423481	2	0.000308	55.8443	2.26471	1	0.132351	LDL
Other venous embolism and thrombosis	circulatory system	-0.0378	0.962903	0.019186	0.0487983	logistic	455169	2843	452326	2	0.004873	78.5781	4.66811	1	0.030728	LDL
Scar conditions and fibrosis of skin	dermatologic	0.031897	1.03241	0.016295	0.0502893	logistic	464629	3811	460818	2	0	0	0.302173	1	0.582523	LDL
Hyperpotassemia	endocrine/metabolic	0.030043	1.0305	0.015355	0.0503951	logistic	466219	4349	461870	2	0	0	0.843737	1	0.35833	LDL
Traumatic amputation	injuries & poisonings	-0.06307	0.938876	0.032275	0.0506766	logistic	469080	959	468121	2	0	0	0.538235	1	0.463165	LDL
Nontoxic multinodular goiter	endocrine/metabolic	-0.04932	0.951878	0.025309	0.0513388	logistic	466965	1585	465380	2	0	0	0.624251	1	0.429472	LDL
Injuries to the nervous system	injuries & poisonings	0.046772	1.04788	0.024123	0.052516	logistic	477647	1732	475915	2	0	0	0.800157	1	0.371047	LDL
Agorophobia, social phobia, and panic disorder	mental disorders	-0.0313	0.969184	0.016191	0.0532169	logistic	439503	4247	435256	2	0.000557	50.9522	2.03883	1	0.153328	LDL
Herpes simplex	infectious diseases	-0.04867	0.952492	0.02519	0.0533239	logistic	463373	1619	461754	2	0	0	0.238009	1	0.625648	LDL
Obsessive-compulsive disorders	mental disorders	-0.07217	0.930372	0.037561	0.0546746	logistic	437385	723	436662	2	0	0	0.005854	1	0.93901	LDL
Back pain	symptoms	-0.01188	0.988193	0.00619	0.0550232	logistic	470938	40101	430837	2	7.84e-05	49.9248	1.997	1	0.157611	LDL
Eosinophill_count	Biomarkers & Measurements	0.000414	NA	0.000216	0.0554233	linear	413281	NA	NA	2	0.011996	45.9416	1.84985	1	0.173801	LDL
Acute renal failure	genitourinary	0.014191	1.01429	0.007435	0.0563166	logistic	466032	19299	446733	2	0.000401	67.4722	3.07429	1	0.079539	LDL
Graves' disease	endocrine/metabolic	-0.06253	0.939387	0.033022	0.0582927	logistic	466574	923	465651	2	0	0	0.001995	1	0.964378	LDL
Other diseases of respiratory system, not elsewhere classified	respiratory	0.014442	1.01455	0.007649	0.0590029	logistic	474311	17997	456314	2	0	0	0.004878	1	0.944316	LDL
Other vitamin B12 deficiency anemia	hematopoietic	-0.05205	0.949283	0.027616	0.0594666	logistic	462671	1325	461346	2	0	0	0.547788	1	0.459223	LDL
Other conditions of brain, NOS	neurological	-0.07682	0.926061	0.040836	0.0599605	logistic	464953	600	464353	2	0.000612	14.8867	1.17491	1	0.278396	LDL
Synoviopathy	musculoskeletal	0.051097	1.05242	0.027254	0.0608078	logistic	449781	1375	448406	2	0.003022	65.5286	2.90096	1	0.088527	LDL
Unspecified disorder of lipoid metabolism	endocrine/metabolic	0.275026	1.31656	0.14732	0.061921	logistic	427165	993	426172	2	0.040967	94.3316	17.6415	1	2.67e-05	LDL
Cancer of bladder	neoplasms	-0.02802	0.972372	0.015028	0.0622775	logistic	476795	4488	472307	2	0.01035	91.7343	12.0981	1	0.000505	LDL
Disorders of adrenal glands	endocrine/metabolic	-0.05067	0.950595	0.027475	0.0651714	logistic	470084	1333	468751	2	0.000131	6.12813	1.06528	1	0.302014	LDL
Hallucinations	mental disorders	0.063076	1.06511	0.034231	0.0653832	logistic	465582	856	464726	2	0	0	0.014495	1	0.904169	LDL
Valvular heart disease/ heart chambers	congenital anomalies	-0.07274	0.929842	0.039535	0.0657803	logistic	477500	639	476861	2	0	0	0.468455	1	0.493699	LDL
Perforation of tympanic membrane	sense organs	-0.04913	0.952056	0.026739	0.0661483	logistic	469462	1400	468062	2	0	0	0.131137	1	0.717256	LDL
Degenerative disease of the spinal cord	neurological	-0.03324	0.967304	0.018184	0.0675308	logistic	464885	3043	461842	2	0	0	0.227881	1	0.6331	LDL
Peritonitis and retroperitoneal infections	digestive	-0.04323	0.957687	0.023704	0.0681589	logistic	471720	1782	469938	2	0.000411	14.3271	1.16723	1	0.279971	LDL
Balanoposthitis	genitourinary	0.071233	1.07383	0.039068	0.0682607	logistic	445380	664	444716	2	0	0	0.045032	1	0.831946	LDL
Vitamin D deficiency	endocrine/metabolic	0.018468	1.01864	0.010165	0.0692557	logistic	468840	10851	457989	2	0.000352	59.6193	2.47643	1	0.115564	LDL
Hypopotassemia	endocrine/metabolic	0.021576	1.02181	0.011902	0.0698619	logistic	466830	7235	459595	2	0.000491	59.3522	2.46016	1	0.116767	LDL
Spinal stenosis	musculoskeletal	-0.01873	0.981448	0.010351	0.0704507	logistic	458465	9645	448820	2	0.000238	44.3147	1.79581	1	0.18022	LDL
Fracture of lower limb	injuries & poisonings	-0.02185	0.978382	0.012117	0.0712841	logistic	468790	6954	461836	2	0	0	0.000881	1	0.976316	LDL
Nodular lymphoma	neoplasms	0.070686	1.07324	0.039243	0.0716679	logistic	476067	658	475409	2	0	0	0.264198	1	0.60725	LDL
Flat foot	musculoskeletal	-0.04086	0.959962	0.022781	0.0728669	logistic	463844	1997	461847	2	0	0	0.346548	1	0.556074	LDL
Incisional hernia	digestive	-0.04433	0.956643	0.024758	0.0734029	logistic	466135	1646	464489	2	0.001969	60.4753	2.53007	1	0.111696	LDL
Calcaneal spur; Exostosis NOS	musculoskeletal	-0.03604	0.964598	0.020228	0.0747792	logistic	450678	2500	448178	2	0	0	0.565802	1	0.451932	LDL
Malignant neoplasm of liver, primary	neoplasms	-0.07167	0.930837	0.04026	0.0750416	logistic	472920	621	472299	2	0.005689	63.2361	2.72006	1	0.099094	LDL
Otitis media	sense organs	-0.034	0.966574	0.019359	0.079069	logistic	469734	2694	467040	2	0.000714	38.9897	1.63907	1	0.200454	LDL
Anemia of chronic disease	hematopoietic	0.041572	1.04245	0.02368	0.079164	logistic	462170	1808	460362	2	0	0	0.294933	1	0.587077	LDL
Antisocial/borderline personality disorder	mental disorders	-0.0551	0.946392	0.031547	0.0807201	logistic	437816	1127	436689	2	0.000818	20.8531	1.26347	1	0.260995	LDL
Dermatophytosis of nail	infectious diseases	-0.02005	0.980151	0.011641	0.0850087	logistic	466819	9122	457697	2	0.003334	49.6893	1.98765	1	0.158587	LDL
Cancer of kidney and renal pelvis	neoplasms	0.036854	1.03754	0.021584	0.0877378	logistic	476484	2164	474320	2	0	0	0.04792	1	0.826722	LDL
Cerebral aneurysm	circulatory system	-0.06049	0.941303	0.035492	0.0883198	logistic	467296	799	466497	2	0.009259	70.9836	3.44633	1	0.063392	LDL
Other and unspecified coagulation defects	hematopoietic	0.051529	1.05288	0.030281	0.088816	logistic	466012	1105	464907	2	0.00012	6.15026	1.06553	1	0.301957	LDL
Abdominal pain	symptoms	-0.00951	0.990539	0.00559	0.0890352	logistic	470261	35459	434802	2	0	0	0.320548	1	0.571278	LDL
Hemorrhage of rectum and anus	digestive	0.013377	1.01347	0.007867	0.0890663	logistic	466678	16802	449876	2	0	0	0.507794	1	0.476095	LDL
Polycythemia, secondary	hematopoietic	-0.05177	0.949546	0.030493	0.089546	logistic	468629	1075	467554	2	0	0	0.13595	1	0.712341	LDL
Open wound of foot except toe(s) alone	injuries & poisonings	-0.07458	0.928137	0.043967	0.0898505	logistic	468907	508	468399	2	0.008902	69.6754	3.29766	1	0.069379	LDL
Other specified erythematous conditions	dermatologic	-0.05814	0.943516	0.03447	0.0916517	logistic	462051	847	461204	2	0	0	0.573221	1	0.448982	LDL
Strabismus (not specified as paralytic)	sense organs	-0.03661	0.96405	0.021752	0.0923486	logistic	454691	2151	452540	2	0	0	0.078767	1	0.778975	LDL
Phlebitis and thrombophlebitis	circulatory system	0.035075	1.0357	0.02084	0.0923636	logistic	452997	2319	450678	2	0	0	0.36384	1	0.546381	LDL
Diseases of esophagus	digestive	-0.00762	0.992407	0.004531	0.0925334	logistic	446069	57273	388796	2	0.003108	60.1398	2.50877	1	0.113215	LDL
Paralytic ileus	digestive	0.044021	1.045	0.02636	0.0949271	logistic	455780	1436	454344	2	0.025886	89.7996	9.8035	1	0.001742	LDL
Diseases of pancreas	digestive	-0.0235	0.976771	0.014175	0.0972978	logistic	476862	5039	471823	2	0.000216	9.03354	1.09931	1	0.294418	LDL
Malignant neoplasm of bladder	neoplasms	-0.02447	0.975824	0.014812	0.0984869	logistic	477347	4639	472708	2	0.004428	88.3398	8.5762	1	0.003406	LDL
Peripheral enthesopathies and allied syndromes	musculoskeletal	-0.0107	0.989361	0.006474	0.0985334	logistic	455263	25579	429684	2	0	0	0.00713	1	0.932708	LDL
Renal dialysis	genitourinary	0.051956	1.05333	0.031532	0.0994164	logistic	462897	1005	461892	2	0.016266	86.0156	7.15084	1	0.007493	LDL
Acute pancreatitis	digestive	-0.02672	0.973638	0.016234	0.0998256	logistic	477386	3826	473560	2	0	0	0.10303	1	0.748223	LDL
Hematuria	genitourinary	0.011141	1.0112	0.006813	0.10202	logistic	466080	22964	443116	2	0	0	0.258696	1	0.611018	LDL
Retinal hemorrhage/ischemia	sense organs	-0.062	0.93988	0.037949	0.102293	logistic	452600	698	451902	2	0	0	0.65363	1	0.418818	LDL
Anal and rectal polyp	digestive	0.014757	1.01487	0.009052	0.103067	logistic	471785	12626	459159	2	0	0	0.017853	1	0.893707	LDL
Ankylosing spondylitis	musculoskeletal	0.055548	1.05712	0.034159	0.103914	logistic	470962	862	470100	2	0	0	0.125422	1	0.723227	LDL
Disorders of the autonomic nervous system	neurological	0.06167	1.06361	0.038029	0.104883	logistic	464829	696	464133	2	0	0	0.374293	1	0.540673	LDL
Disorders of conjunctiva	sense organs	-0.03742	0.963269	0.023098	0.105204	logistic	459315	1915	457400	2	0	0	0.305094	1	0.580707	LDL
Essential tremor	neurological	-0.0347	0.965893	0.02152	0.106851	logistic	466123	2185	463938	2	0.000788	43.963	1.78453	1	0.181593	LDL
Dysmenorrhea	genitourinary	-0.03848	0.962252	0.02391	0.107546	logistic	411386	1807	409579	2	0	0	0.239767	1	0.624375	LDL
Dependence on respirator [Ventilator] or supplemental oxygen	respiratory	-0.03737	0.963316	0.023327	0.109123	logistic	470337	1848	468489	2	0	0	0.482133	1	0.487458	LDL
Benign neoplasm of pituitary gland and craniopharyngeal duct (pouch)	neoplasms	-0.05832	0.943352	0.036678	0.111848	logistic	477284	744	476540	2	0	0	0.04434	1	0.833223	LDL
Disorders of bilirubin excretion	endocrine/metabolic	-0.0512	0.950086	0.032346	0.113428	logistic	474666	963	473703	2	0.003271	52.8584	2.12127	1	0.145266	LDL
Pneumonitis due to inhalation of food or vomitus	respiratory	0.032443	1.03297	0.020544	0.114292	logistic	469879	2392	467487	2	0	0	0.242021	1	0.622751	LDL
Symptoms involving nervous and musculoskeletal systems	symptoms	0.016868	1.01701	0.010717	0.115508	logistic	476970	8998	467972	2	0.004045	79.9946	4.99864	1	0.025367	LDL
Chronic venous insufficiency [CVI]	circulatory system	-0.02874	0.971673	0.018399	0.118323	logistic	455355	3143	452212	2	0	0	0.085003	1	0.770629	LDL
Benign neoplasm of eye, uveal	neoplasms	0.034164	1.03476	0.022011	0.120633	logistic	476328	2174	474154	2	0.003286	50.8349	2.03396	1	0.153819	LDL
Other disorders of soft tissues	musculoskeletal	-0.04845	0.952704	0.031259	0.121145	logistic	449566	1023	448543	2	0	0	0.088525	1	0.76606	LDL
Ulcerative colitis (chronic)	digestive	0.04764	1.04879	0.030807	0.122007	logistic	455776	1067	454709	2	0.00743	68.4016	3.16472	1	0.075245	LDL
Retention of urine	genitourinary	0.01219	1.01226	0.007904	0.122998	logistic	463123	17086	446037	2	0	0	0.149798	1	0.698728	LDL
Fracture of foot	injuries & poisonings	0.037469	1.03818	0.024565	0.127184	logistic	469173	1692	467481	2	0.000403	24.9925	1.3332	1	0.248237	LDL
Orthostatic hypotension	circulatory system	0.020968	1.02119	0.013781	0.128123	logistic	468658	5357	463301	2	0.002192	79.1941	4.80632	1	0.028356	LDL
Open-angle glaucoma	sense organs	-0.01814	0.982022	0.011935	0.128519	logistic	458604	7822	450782	2	0.001623	84.0287	6.26123	1	0.012341	LDL
Althete's foot	infectious diseases	-0.03217	0.968344	0.021191	0.129022	logistic	459961	2331	457630	2	0	0	0.038414	1	0.844614	LDL
Pernicious anemia	hematopoietic	-0.04041	0.960396	0.026718	0.130416	logistic	461808	1405	460403	2	0.008709	69.7984	3.31108	1	0.068814	LDL
Congenital deformities of feet	congenital anomalies	0.042588	1.04351	0.028228	0.131374	logistic	475914	1283	474631	2	0	0	0.593572	1	0.441041	LDL
Disorders of esophageal motility	digestive	-0.04103	0.959798	0.027268	0.132375	logistic	446044	1347	444697	2	0	0	0.163782	1	0.685698	LDL
Nephritis and nephropathy with pathological lesion	genitourinary	0.057763	1.05946	0.038542	0.133956	logistic	462869	676	462193	2	0	0	0.512856	1	0.473905	LDL
Portal hypertension	digestive	-0.04077	0.960049	0.027265	0.134815	logistic	465747	1345	464402	2	0	0	0.380641	1	0.53726	LDL
Cholesteatoma	sense organs	-0.05059	0.950665	0.033966	0.136344	logistic	469323	868	468455	2	0	0	0.000152	1	0.990156	LDL
Emphysema	respiratory	-0.02123	0.978996	0.014376	0.139782	logistic	456298	4935	451363	2	0	0	3.54e-05	1	0.995256	LDL
Major depressive disorder	mental disorders	-0.00845	0.991586	0.005737	0.140821	logistic	452517	38531	413986	2	0.00066	89.1898	9.25051	1	0.002354	LDL
Cirrhosis of liver without mention of alcohol	digestive	-0.03646	0.964199	0.02476	0.140901	logistic	466892	1649	465243	2	0	0	0.032789	1	0.856307	LDL
Other chronic nonalcoholic liver disease	digestive	-0.0163	0.983828	0.011092	0.141581	logistic	467145	8282	458863	2	0	0	0.048267	1	0.826106	LDL
Diseases of the oral soft tissues, excluding lesions specific for gingiva and tongue	digestive	0.026071	1.02641	0.017817	0.14339	logistic	472855	3177	469678	2	0	0	0.191707	1	0.6615	LDL
Hyperplasia of prostate	genitourinary	-0.00897	0.99107	0.006151	0.144779	logistic	461504	36574	424930	2	0	0	0.958005	1	0.32769	LDL
Sinoatrial node dysfunction (Bradycardia)	circulatory system	0.037018	1.03771	0.025396	0.144937	logistic	450624	1578	449046	2	0	0	0.688341	1	0.406729	LDL
Atopic/contact dermatitis due to other or unspecified	dermatologic	-0.01386	0.986234	0.009563	0.147192	logistic	464990	12079	452911	2	0.000708	78.991	4.75987	1	0.029131	LDL
Nephrotic syndrome without mention of glomerulonephritis	genitourinary	0.042177	1.04308	0.029169	0.148196	logistic	462759	1186	461573	2	0	0	0.204408	1	0.651186	LDL
Strabismus and other disorders of binocular eye movements	sense organs	-0.02839	0.97201	0.01967	0.148946	logistic	453916	2615	451301	2	0	0	0.24358	1	0.621632	LDL
Memory loss	mental disorders	0.02592	1.02626	0.017979	0.149405	logistic	467263	3194	464069	2	0.000552	45.8342	1.84618	1	0.174228	LDL
Pain, swelling or discharge of eye	sense organs	-0.05419	0.947251	0.037682	0.150406	logistic	453906	698	453208	2	0	0	0.909073	1	0.34036	LDL
Symptomatic menopause	genitourinary	-0.05165	0.94966	0.036028	0.151675	logistic	411997	1067	410930	2	0	0	0.872499	1	0.350264	LDL
Internal derangement of knee	injuries & poisonings	-0.01049	0.989568	0.007325	0.152235	logistic	472825	19485	453340	2	0	0	0.017694	1	0.894179	LDL
Other dyschromia	dermatologic	-0.02895	0.971469	0.020234	0.152564	logistic	462773	2482	460291	2	0	0	0.016708	1	0.897152	LDL
Varicose veins	circulatory system	-0.01207	0.988004	0.008438	0.152657	logistic	453081	14592	438489	2	0	0	0.232712	1	0.62952	LDL
Multiple sclerosis	neurological	-0.03122	0.969259	0.02195	0.154884	logistic	465083	2084	462999	2	0.000576	25.8436	1.3485	1	0.24554	LDL
Acute sinusitis	respiratory	-0.02559	0.974733	0.018098	0.15734	logistic	458347	3254	455093	2	0	0	0.472432	1	0.49187	LDL
Nonspecific findings on examination of blood	symptoms	0.054912	1.05645	0.039005	0.159183	logistic	470299	661	469638	2	0	0	0.002557	1	0.959673	LDL
Chronic airway obstruction	respiratory	-0.00846	0.99158	0.006015	0.159801	logistic	466418	31859	434559	2	0.000373	81.6386	5.4462	1	0.019611	LDL
Optic neuritis/neuropathy	sense organs	-0.05198	0.949349	0.037036	0.160476	logistic	453952	724	453228	2	0.001207	29.2711	1.41385	1	0.234418	LDL
Disorders of sacrum	musculoskeletal	-0.04603	0.955012	0.032879	0.161511	logistic	456542	921	455621	2	0.001954	47.2259	1.89487	1	0.168654	LDL
Arthropathy NOS	musculoskeletal	-0.02068	0.979535	0.014957	0.166813	logistic	468101	4916	463185	2	0	0	0.2023	1	0.652871	LDL
Nasal polyps	respiratory	0.020941	1.02116	0.015179	0.167698	logistic	450420	4405	446015	2	0	0	0.666131	1	0.414404	LDL
Palpitations	circulatory system	0.01503	1.01514	0.011085	0.175132	logistic	452306	8360	443946	2	0.000261	45.1659	1.82368	1	0.176876	LDL
Respiratory failure	respiratory	0.016687	1.01683	0.012326	0.175801	logistic	470888	6727	464161	2	0	0	0.405146	1	0.524444	LDL
Fracture of upper limb	injuries & poisonings	0.012255	1.01233	0.00906	0.176153	logistic	468741	12642	456099	2	0	0	0.413295	1	0.520302	LDL
Malignant neoplasm of kidney, except pelvis	neoplasms	0.027367	1.02774	0.020353	0.17875	logistic	476833	2438	474395	2	0	0	0.936307	1	0.333229	LDL
Chronic ulcer of leg or foot	dermatologic	-0.02039	0.97982	0.015184	0.179386	logistic	476176	4412	471764	2	0.000203	30.19	1.43246	1	0.231363	LDL
Conductive hearing loss	sense organs	-0.03791	0.962798	0.028256	0.179679	logistic	441984	1265	440719	2	0	0	0.031845	1	0.858369	LDL
Other upper respiratory disease	respiratory	-0.02339	0.976883	0.017432	0.179693	logistic	451579	3368	448211	2	0	0	0.221241	1	0.638096	LDL
Chronic tonsillitis and adenoiditis	respiratory	-0.03583	0.964804	0.026763	0.18063	logistic	450085	1397	448688	2	0	0	0.183782	1	0.668143	LDL
Alcoholism	mental disorders	0.012376	1.01245	0.009253	0.181072	logistic	452279	13421	438858	2	0	0	0.809017	1	0.368411	LDL
Cervical radiculitis	symptoms	-0.02666	0.97369	0.019975	0.181959	logistic	465159	2610	462549	2	0	0	0.440037	1	0.507105	LDL
Benign neoplasm of male genital organs	neoplasms	-0.05439	0.947059	0.041006	0.18468	logistic	466239	591	465648	2	0.010964	75.0699	4.01122	1	0.045198	LDL
Chronic periodontitis	digestive	-0.02674	0.973611	0.020198	0.185489	logistic	459737	2487	457250	2	0	0	0.151189	1	0.697402	LDL
Influenza	respiratory	0.036374	1.03704	0.027582	0.187247	logistic	462633	1326	461307	2	0	0	0.005703	1	0.939802	LDL
Other immunological findings	endocrine/metabolic	-0.05754	0.944085	0.043804	0.189002	logistic	477990	518	477472	2	0	0	0.790525	1	0.373941	LDL
Neoplasm of uncertain behavior	neoplasms	0.022016	1.02226	0.016764	0.189102	logistic	470885	3650	467235	2	0	0	0.172271	1	0.678101	LDL
Other and unspecified disc disorder	musculoskeletal	-0.02583	0.974503	0.019791	0.19188	logistic	457371	2586	454785	2	5.71e-05	6.77393	1.07266	1	0.300345	LDL
Retinal vascular changes and abnomalities	sense organs	0.033186	1.03374	0.025454	0.192308	logistic	453355	1615	451740	2	0	0	0.184994	1	0.667116	LDL
Atrioventricular block, complete	circulatory system	0.028464	1.02887	0.022003	0.195791	logistic	450691	2111	448580	2	0	0	0.316378	1	0.573792	LDL
Cough	respiratory	0.011922	1.01199	0.009235	0.196741	logistic	455017	13165	441852	2	0	0	0.001614	1	0.967957	LDL
Depression	mental disorders	-0.00713	0.992899	0.00555	0.199136	logistic	457535	43620	413915	2	0.00038	84.5858	6.48752	1	0.010863	LDL
Viral warts & HPV	infectious diseases	-0.01981	0.980381	0.01547	0.200278	logistic	464779	4325	460454	2	0	0	0.000583	1	0.980733	LDL
Nonspecific elevation of levels of transaminase or lactic acid dehydrogenase [LDH]	digestive	-0.04736	0.953743	0.037168	0.202581	logistic	466062	720	465342	2	0	0	0.012937	1	0.909444	LDL
First degree AV block	circulatory system	0.021514	1.02175	0.016908	0.203213	logistic	450597	3569	447028	2	0	0	0.694865	1	0.404514	LDL
Other non-epithelial cancer of skin	neoplasms	0.010437	1.01049	0.008217	0.204016	logistic	468125	16331	451794	2	0	0	0.013299	1	0.90819	LDL
Senile cataract	sense organs	0.007809	1.00784	0.006168	0.205539	logistic	465097	38862	426235	2	0	0	0.562715	1	0.453169	LDL
Tobacco use disorder	mental disorders	0.008048	1.00808	0.006403	0.208791	logistic	465685	33030	432655	2	0.000232	73.8228	3.82011	1	0.050641	LDL
Disorders of refraction and accommodation; blindness and low vision	sense organs	-0.01013	0.989917	0.008066	0.208943	logistic	451645	19031	432614	2	0	0	0.003414	1	0.95341	LDL
Secondary malignancy of respiratory organs	neoplasms	-0.01766	0.9825	0.014124	0.211287	logistic	469319	5092	464227	2	0.001549	38.4899	1.62575	1	0.202292	LDL
Pain in joint	musculoskeletal	-0.00786	0.992168	0.006304	0.212291	logistic	469561	46605	422956	2	0	0	0.993405	1	0.318911	LDL
Gouty arthropathy	endocrine/metabolic	-0.03344	0.967113	0.02686	0.213141	logistic	472712	1409	471303	2	0.000245	9.03053	1.09927	1	0.294426	LDL
Thyrotoxicosis with or without goiter	endocrine/metabolic	-0.0207	0.979516	0.016626	0.213188	logistic	466949	3661	463288	2	0	0	0.835655	1	0.360642	LDL
Acute appendicitis	digestive	-0.03833	0.962399	0.030791	0.213224	logistic	478422	1058	477364	2	0.001213	36.4711	1.57409	1	0.209615	LDL
Painful respiration	respiratory	0.036522	1.0372	0.029357	0.213477	logistic	448347	1191	447156	2	0	0	0.006251	1	0.93698	LDL
Acute reaction to stress	mental disorders	-0.04974	0.951476	0.040242	0.216438	logistic	437349	625	436724	2	0	0	0.82084	1	0.364935	LDL
Herpes zoster	infectious diseases	-0.02789	0.972493	0.022857	0.22235	logistic	463221	1951	461270	2	0	0	0.617683	1	0.431909	LDL
Gram positive septicemia	infectious diseases	0.036943	1.03763	0.030302	0.222781	logistic	471280	1094	470186	2	0	0	0.049778	1	0.823451	LDL
Intestinal infection due to C. difficile	infectious diseases	0.032137	1.03266	0.026624	0.227404	logistic	476480	1419	475061	2	0	0	0.092113	1	0.761508	LDL
Osteoarthrosis, generalized	musculoskeletal	-0.01063	0.989422	0.008846	0.229305	logistic	448716	13293	435423	2	0.000173	27.3242	1.37597	1	0.240788	LDL
Calculus of lower urinary tract	genitourinary	-0.02972	0.97072	0.024847	0.231695	logistic	471573	1632	469941	2	0	0	0.034046	1	0.853609	LDL
Abnormal serum enzyme levels	digestive	0.037576	1.03829	0.031499	0.232894	logistic	466078	1014	465064	2	0.005826	74.1362	3.8664	1	0.049262	LDL
Other hypertrophic and atrophic conditions of skin	dermatologic	0.012764	1.01285	0.010735	0.23443	logistic	465629	8901	456728	2	0.000153	28.3758	1.39618	1	0.237365	LDL
Acquired spondylolisthesis	musculoskeletal	-0.02171	0.978522	0.018343	0.236536	logistic	462524	2990	459534	2	0.000316	17.6295	1.21403	1	0.270536	LDL
Anaphylactic shock NOS	injuries & poisonings	0.037046	1.03774	0.031302	0.236612	logistic	457744	1030	456714	2	0	0	0.183682	1	0.668228	LDL
Bipolar	mental disorders	-0.01771	0.982447	0.014965	0.23667	logistic	440860	5398	435462	2	2.92e-06	0.564076	1.00567	1	0.315942	LDL
Prurigo and Lichen	dermatologic	0.026139	1.02648	0.022115	0.237226	logistic	462379	2073	460306	2	0.000307	22.8715	1.29654	1	0.254847	LDL
Varicose veins of lower extremity	circulatory system	-0.00995	0.990101	0.008417	0.23724	logistic	453810	14651	439159	2	0	0	0.126842	1	0.721729	LDL
Posttraumatic stress disorder	mental disorders	-0.01261	0.987465	0.010684	0.237727	logistic	451750	15222	436528	2	0.003667	71.8156	3.54806	1	0.059615	LDL
Iron deficiency anemia secondary to blood loss (chronic)	hematopoietic	0.035845	1.03649	0.030379	0.23804	logistic	462029	1092	460937	2	0	0	0.313731	1	0.5754	LDL
Acute pharyngitis	respiratory	0.021646	1.02188	0.018373	0.238744	logistic	457059	3055	454004	2	0.003408	83.3281	5.99811	1	0.014321	LDL
Disorders of menstruation and other abnormal bleeding from female genital tract	genitourinary	-0.00954	0.99051	0.008111	0.239736	logistic	411357	17242	394115	2	0.005007	67.4555	3.07271	1	0.079616	LDL
Melanomas of skin, dx or hx	neoplasms	-0.0165	0.98364	0.014048	0.240321	logistic	463001	5139	457862	2	0.001772	77.2894	4.40322	1	0.035871	LDL
Chronic osteomyelitis	musculoskeletal	-0.04664	0.954429	0.039867	0.242032	logistic	463812	631	463181	2	0	0	0.046106	1	0.829982	LDL
Benign neoplasm of brain, cranial nerves, meninges	neoplasms	-0.02937	0.971059	0.025202	0.243886	logistic	474635	1581	473054	2	0	0	0.064639	1	0.799309	LDL
Chronic pancreatitis	digestive	0.034434	1.03503	0.02957	0.24422	logistic	476967	1145	475822	2	0.001773	45.9608	1.85051	1	0.173724	LDL
Sleep apnea	neurological	-0.00878	0.991255	0.00758	0.246522	logistic	459550	21401	438149	2	0	0	0.430714	1	0.511639	LDL
Other disorders of prostate	genitourinary	0.02379	1.02408	0.020579	0.24767	logistic	445747	2401	443346	2	0	0	0.681238	1	0.409161	LDL
Corns and callosities	dermatologic	-0.01979	0.980409	0.017117	0.24771	logistic	467154	3644	463510	2	0.004235	76.84	4.31778	1	0.037716	LDL
Benign neoplasm of respiratory and intrathoracic organs	neoplasms	0.046856	1.04797	0.040561	0.248002	logistic	478371	612	477759	2	0	0	0.422489	1	0.515698	LDL
Abdominal hernia	digestive	-0.00543	0.994589	0.004726	0.250994	logistic	466166	51814	414352	2	0	0	0.176518	1	0.674383	LDL
Ileostomy status	digestive	0.021825	1.02206	0.019037	0.251627	logistic	455831	2789	453042	2	0.005924	71.4088	3.49758	1	0.061458	LDL
Cancer of brain	neoplasms	0.037005	1.0377	0.032289	0.251782	logistic	474429	959	473470	2	0.000425	7.36492	1.0795	1	0.298808	LDL
Myopia	sense organs	-0.01207	0.988007	0.010672	0.258238	logistic	447620	10270	437350	2	0.000241	48.1653	1.92921	1	0.164845	LDL
Thyroid cancer	neoplasms	0.039426	1.04021	0.034903	0.258655	logistic	477326	825	476501	2	0.00483	64.5491	2.8208	1	0.09305	LDL
Cancer of bronchus; lung	neoplasms	-0.01544	0.984677	0.013679	0.258971	logistic	478150	5465	472685	2	0.000719	55.7279	2.25876	1	0.13286	LDL
Other nondiabetic retinopathy	sense organs	-0.0219	0.978339	0.019424	0.259563	logistic	453138	2687	450451	2	0	0	0.054086	1	0.8161	LDL
Keratitis	sense organs	-0.04738	0.953726	0.042251	0.26213	logistic	458376	565	457811	2	0.002275	35.0557	1.53978	1	0.21465	LDL
Ulcer of esophagus	digestive	-0.01357	0.98652	0.01213	0.263173	logistic	446146	6932	439214	2	2.32e-05	1.38639	1.01406	1	0.313932	LDL
Astigmatism	sense organs	0.010454	1.01051	0.009461	0.269175	logistic	452478	15002	437476	2	0	0	0.253159	1	0.614859	LDL
Other abnormal glucose	endocrine/metabolic	0.017311	1.01746	0.015697	0.2701	logistic	451412	4469	446943	2	0	0	0.46859	1	0.493637	LDL
Chronic pharyngitis and nasopharyngitis	respiratory	-0.01856	0.981609	0.016855	0.27076	logistic	452203	3667	448536	2	0	0	0.841709	1	0.358908	LDL
Other disorders of the kidney and ureters	genitourinary	0.011957	1.01203	0.01089	0.272242	logistic	464415	8692	455723	2	0	0	0.025062	1	0.874211	LDL
Non-Hodgkins lymphoma	neoplasms	0.0191	1.01928	0.017428	0.273125	logistic	476563	3341	473222	2	0.000468	31.2941	1.45548	1	0.227651	LDL
Sacroiliitis NEC	musculoskeletal	-0.04512	0.955881	0.0412	0.273433	logistic	471208	592	470616	2	0	0	0.079563	1	0.777891	LDL
Triglycerides	Biomarkers & Measurements	0.324704	NA	0.298035	0.275941	linear	408726	NA	NA	2	0.175129	98.5604	69.4641	1	7.78e-17	LDL
Anxiety disorder	mental disorders	-0.0072	0.992821	0.006613	0.27598	logistic	450406	29092	421314	2	0.000244	71.6495	3.52728	1	0.060367	LDL
Primary/intrinsic cardiomyopathies	circulatory system	-0.0167	0.983436	0.015395	0.277973	logistic	475830	4329	471501	2	0.001095	69.6127	3.29084	1	0.069667	LDL
Acute bronchitis and bronchiolitis	respiratory	0.017154	1.0173	0.015818	0.278156	logistic	466265	4340	461925	2	0	0	0.175286	1	0.675456	LDL
Paralytic strabismus	sense organs	-0.03977	0.961008	0.036897	0.281066	logistic	453747	740	453007	2	0.001637	34.523	1.52725	1	0.216525	LDL
Ectropion or entropion	sense organs	-0.02086	0.979358	0.019423	0.282866	logistic	458929	2710	456219	2	0	0	0.932814	1	0.334133	LDL
Rheumatoid_factor	Biomarkers & Measurements	0.025497	NA	0.02377	0.283414	linear	37501	NA	NA	2	0	0	0.775014	1	0.37867	LDL
Tachycardia NOS	circulatory system	-0.0139	0.986201	0.012969	0.283985	logistic	451390	6045	445345	2	0	0	0.002267	1	0.962021	LDL
Parkinson's disease	neurological	-0.01773	0.982426	0.016603	0.285575	logistic	465569	3669	461900	2	0.00328	80.9309	5.24409	1	0.022021	LDL
Unequal leg length (acquired)	musculoskeletal	-0.03975	0.961032	0.037561	0.289961	logistic	462731	709	462022	2	0.015204	74.4285	3.91061	1	0.047982	LDL
Peptic ulcer, site unspecified	digestive	-0.02545	0.974872	0.024099	0.29096	logistic	476452	1754	474698	2	0	0	0.103832	1	0.747279	LDL
Esophageal bleeding (varices/hemorrhage)	digestive	0.020667	1.02088	0.019616	0.292077	logistic	446245	2607	443638	2	0.003033	68.0198	3.12694	1	0.077008	LDL
Sensorineural hearing loss	sense organs	-0.0093	0.99074	0.008856	0.293487	logistic	464916	24899	440017	2	0	0	0.004106	1	0.948908	LDL
Psoriatic arthropathy	dermatologic	0.026846	1.02721	0.02558	0.293952	logistic	460650	1540	459110	2	0	0	0.391536	1	0.531493	LDL
Other disorders of eye	sense organs	-0.01795	0.982206	0.017166	0.295593	logistic	453655	3427	450228	2	0	0	0.382396	1	0.536324	LDL
Chronic kidney disease, Stage I or II	genitourinary	0.022813	1.02308	0.021827	0.295938	logistic	463519	2129	461390	2	0	0	0.012923	1	0.909491	LDL
Acne	dermatologic	-0.03475	0.965842	0.033443	0.298703	logistic	464234	924	463310	2	0	0	0.091171	1	0.762693	LDL
Open wounds of head; neck; and trunk	injuries & poisonings	0.024477	1.02478	0.023567	0.298999	logistic	469333	1814	467519	2	0	0	0.772337	1	0.379495	LDL
Viral infection	infectious diseases	0.016906	1.01705	0.016318	0.300177	logistic	462471	3797	458674	2	0	0	0.001681	1	0.967292	LDL
Chronic dermatitis due to solar radiation	dermatologic	0.033528	1.0341	0.032415	0.300982	logistic	458050	976	457074	2	0	0	0.043624	1	0.834555	LDL
Difficulty in walking	musculoskeletal	0.020177	1.02038	0.019621	0.303777	logistic	468593	2723	465870	2	0	0	0.296908	1	0.585827	LDL
Postoperative infection	infectious diseases	0.012416	1.01249	0.012138	0.306341	logistic	477048	6898	470150	2	0.000209	19.0599	1.23548	1	0.266344	LDL
Disturbance of salivary secretion	digestive	-0.04008	0.960709	0.039191	0.306408	logistic	472968	651	472317	2	0.000126	2.86704	1.02952	1	0.310272	LDL
Basophill_count	Biomarkers & Measurements	-8.22e-05	NA	8.19e-05	0.315265	linear	404422	NA	NA	2	0	0	0.000182	1	0.989231	LDL
Epilepsy, recurrent seizures, convulsions	neurological	0.013022	1.01311	0.012999	0.316454	logistic	465560	5996	459564	2	0	0	0.032847	1	0.85618	LDL
Pulmonary collapse; interstitial and compensatory emphysema	respiratory	0.01246	1.01254	0.012442	0.316621	logistic	470116	6586	463530	2	0	0	0.319833	1	0.571708	LDL
Disorders of penis	genitourinary	0.020124	1.02033	0.020151	0.31797	logistic	438559	2490	436069	2	0	0	0.007579	1	0.930625	LDL
Acidosis	endocrine/metabolic	0.016717	1.01686	0.01676	0.31855	logistic	465174	3590	461584	2	0.000383	26.84	1.36687	1	0.242351	LDL
Peripheral or central vertigo	sense organs	-0.0208	0.979416	0.020863	0.318811	logistic	465508	2346	463162	2	0.00111	56.0459	2.2751	1	0.131467	LDL
Macular degeneration (senile) of retina NOS	sense organs	-0.01163	0.988437	0.011676	0.31922	logistic	453280	7659	445621	2	0	0	0.450645	1	0.502029	LDL
Postlaminectomy syndrome	musculoskeletal	-0.03722	0.963463	0.037486	0.320731	logistic	456752	724	456028	2	0.007693	57.6092	2.359	1	0.124562	LDL
Urinary calculus	genitourinary	-0.01016	0.989887	0.010269	0.322254	logistic	472054	9739	462315	2	0	0	0.210193	1	0.646616	LDL
Other disorders of bladder	genitourinary	-0.00828	0.991752	0.00837	0.32238	logistic	472324	14968	457356	2	0	0	0.689663	1	0.406279	LDL
Hepatitis NOS	infectious diseases	-0.0368	0.963868	0.037222	0.322807	logistic	462400	726	461674	2	0	0	0.78435	1	0.375814	LDL
Blood in stool	digestive	0.012618	1.0127	0.012783	0.323594	logistic	467385	6286	461099	2	0	0	0.104696	1	0.746265	LDL
Hearing loss	sense organs	-0.00686	0.99316	0.006984	0.325691	logistic	459226	28985	430241	2	1.9e-05	16.2669	1.19427	1	0.27447	LDL
HDL_cholesterol	Biomarkers & Measurements	0.312033	NA	0.31856	0.327328	linear	376040	NA	NA	2	0.200452	98.7479	79.8657	1	4.01e-19	LDL
Swelling of limb	symptoms	-0.02922	0.971199	0.029875	0.327984	logistic	473189	1140	472049	2	0	0	0.000893	1	0.976161	LDL
Paroxysmal supraventricular tachycardia	circulatory system	0.014705	1.01481	0.015052	0.328606	logistic	450653	4462	446191	2	0.00043	30.8908	1.44698	1	0.229012	LDL
Bronchopneumonia and lung abscess	respiratory	-0.03274	0.967793	0.033864	0.333671	logistic	462433	872	461561	2	0	0	0.561857	1	0.453513	LDL
Symptoms involving respiratory system and other chest symptoms	respiratory	0.029279	1.02971	0.030346	0.334635	logistic	474445	1108	473337	2	0.006521	77.4225	4.42919	1	0.035329	LDL
Skull and face fracture and other intercranial injury	injuries & poisonings	-0.01762	0.982539	0.018709	0.34644	logistic	476131	2984	473147	2	0	0	0.051049	1	0.821248	LDL
Splenomegaly	digestive	0.027867	1.02826	0.029669	0.3476	logistic	465383	1152	464231	2	0.007726	76.4657	4.24911	1	0.039271	LDL
Diseases of pulp and periapical tissues	digestive	-0.01744	0.982709	0.018657	0.349842	logistic	459143	2899	456244	2	0	0	0.083729	1	0.772306	LDL
Red_blood_cell_erythrocyte_distribution_width	Biomarkers & Measurements	-0.0014	NA	0.001507	0.351284	linear	413847	NA	NA	2	0.084676	81.0172	5.26791	1	0.021722	LDL
Somatoform disorder	mental disorders	-0.02618	0.974164	0.028206	0.353409	logistic	438051	1332	436719	2	0	0	0.124077	1	0.724654	LDL
Primary angle-closure glaucoma	sense organs	-0.02034	0.979869	0.021925	0.353629	logistic	454076	2114	451962	2	0	0	2.5e-05	1	0.996009	LDL
Tension headache	mental disorders	0.033294	1.03385	0.036027	0.355411	logistic	437121	775	436346	2	0.005375	63.3217	2.72641	1	0.098701	LDL
Symptoms affecting skin	dermatologic	-0.01954	0.980651	0.021223	0.357253	logistic	457335	2233	455102	2	0	0	0.087929	1	0.766826	LDL
Gram negative septicemia	infectious diseases	-0.03679	0.963876	0.040019	0.357907	logistic	471292	621	470671	2	0.002421	32.1777	1.47444	1	0.224646	LDL
Acute upper respiratory infections of multiple or unspecified sites	respiratory	0.009407	1.00945	0.01024	0.358273	logistic	462506	10619	451887	2	0.000353	60.7389	2.54705	1	0.1105	LDL
Rupture of synovium	musculoskeletal	-0.02928	0.971142	0.031899	0.358621	logistic	449489	984	448505	2	0	0	0.34765	1	0.555447	LDL
Fever of unknown origin	symptoms	0.010336	1.01039	0.011315	0.361016	logistic	475394	7955	467439	2	0	0	0.271676	1	0.60221	LDL
Type 2 diabetes	endocrine/metabolic	-0.0046	0.995412	0.005041	0.361602	logistic	468355	50093	418262	2	0	0	8.16e-07	1	0.999279	LDL
Viral hepatitis C	infectious diseases	0.016072	1.0162	0.017689	0.363559	logistic	465170	3401	461769	2	0	0	0.539212	1	0.46276	LDL
Other unspecified back disorders	musculoskeletal	-0.03496	0.965646	0.038627	0.365455	logistic	456704	677	456027	2	0	0	0.187783	1	0.664768	LDL
Chronic fatigue syndrome	symptoms	0.024459	1.02476	0.027299	0.370262	logistic	465409	1356	464053	2	0	0	0.56034	1	0.454123	LDL
Adverse drug events and drug allergies	injuries & poisonings	-0.02656	0.973787	0.029958	0.375253	logistic	472084	1121	470963	2	0	0	0.044927	1	0.832139	LDL
Joint effusions	musculoskeletal	0.01548	1.0156	0.017557	0.377926	logistic	467345	3287	464058	2	0	0	0.017195	1	0.895671	LDL
Diseases of nail, NOS	dermatologic	-0.0132	0.986882	0.01529	0.387799	logistic	469292	4656	464636	2	0	0	0.07405	1	0.785528	LDL
Unspecified osteomyelitis	musculoskeletal	-0.02817	0.97222	0.032844	0.391013	logistic	464082	936	463146	2	0	0	0.239497	1	0.62457	LDL
Streptococcus infection	infectious diseases	-0.01516	0.98495	0.017733	0.392465	logistic	471378	3207	468171	2	0	0	0.188547	1	0.664128	LDL
Impacted cerumen	sense organs	-0.01117	0.988888	0.013252	0.399118	logistic	469403	6678	462725	2	0.001747	62.0127	2.63246	1	0.1047	LDL
Other disorders of liver	digestive	0.012948	1.01303	0.015446	0.401892	logistic	466124	4243	461881	2	0	0	0.014677	1	0.903573	LDL
Anorexia	endocrine/metabolic	-0.01878	0.98139	0.022457	0.402876	logistic	461254	1989	459265	2	0.00604	65.3505	2.88604	1	0.08935	LDL
Alcohol-related disorders	mental disorders	0.007139	1.00717	0.008562	0.404402	logistic	452599	15577	437022	2	5.11e-06	3.3424	1.03458	1	0.309085	LDL
Pancreatic cancer	neoplasms	-0.02179	0.978444	0.026159	0.404813	logistic	472778	1469	471309	2	0	0	0.030696	1	0.86092	LDL
Neoplasm of unspecified nature of digestive system	neoplasms	0.021064	1.02129	0.025288	0.404881	logistic	472839	1568	471271	2	0.001529	33.6809	1.50786	1	0.219466	LDL
Benign neoplasm of lip, oral cavity, and pharynx	neoplasms	-0.02092	0.979294	0.025122	0.404915	logistic	476915	1588	475327	2	0	0	0.303962	1	0.581409	LDL
Hemorrhage from gastrointestinal ulcer	digestive	-0.02502	0.975289	0.030186	0.407146	logistic	475435	1105	474330	2	0	0	0.337978	1	0.560999	LDL
Abnormal results of function study of liver	digestive	0.008151	1.00818	0.009846	0.407772	logistic	469139	10698	458441	2	0	0	0.12735	1	0.721195	LDL
Ganglion and cyst of synovium, tendon, and bursa	musculoskeletal	0.011996	1.01207	0.014512	0.408457	logistic	450187	4830	445357	2	0.000754	52.2915	2.09606	1	0.147679	LDL
Disorders of vitreous body	sense organs	-0.01126	0.988805	0.013671	0.410201	logistic	457983	5982	452001	2	0.001583	77.3301	4.41114	1	0.035705	LDL
Acquired hypothyroidism	endocrine/metabolic	0.031603	1.03211	0.038485	0.411542	logistic	466776	685	466091	2	0	0	0.073596	1	0.786171	LDL
Endometriosis	genitourinary	0.012438	1.01252	0.015176	0.412467	logistic	412944	4487	408457	2	0	0	0.586435	1	0.443801	LDL
Diseases of hard tissues of teeth	digestive	-0.01056	0.989493	0.013013	0.416942	logistic	460335	6016	454319	2	0	0	0.459096	1	0.498047	LDL
Cardiac shunt/ heart septal defect	congenital anomalies	0.025783	1.02612	0.031796	0.41743	logistic	477500	995	476505	2	0	0	0.974735	1	0.323502	LDL
Delirium dementia and amnestic and other cognitive disorders	mental disorders	0.07524	1.07814	0.093279	0.419892	logistic	466104	6302	459802	2	0.01652	94.7657	19.1049	1	1.24e-05	LDL
Iatrogenic hypotension	circulatory system	0.03113	1.03162	0.038596	0.419918	logistic	467695	673	467022	2	0	0	0.482835	1	0.487141	LDL
Voice disturbance	respiratory	-0.01475	0.985354	0.018348	0.421318	logistic	451517	3059	448458	2	0.000116	14.6463	1.17159	1	0.279074	LDL
Disturbance of skin sensation	dermatologic	0.008738	1.00878	0.010912	0.423281	logistic	461561	8805	452756	2	0.000879	78.6539	4.68469	1	0.030433	LDL
End stage renal disease	genitourinary	0.021716	1.02195	0.027151	0.4238	logistic	463114	1362	461752	2	0.003196	66.1259	2.95211	1	0.085766	LDL
Heartburn	digestive	0.013309	1.0134	0.016831	0.429093	logistic	446257	3564	442693	2	2.38e-05	1.74487	1.01776	1	0.313051	LDL
Lipoma	neoplasms	0.008491	1.00853	0.010756	0.429896	logistic	474699	8831	465868	2	0	0	0.228216	1	0.63285	LDL
Acute prostatitis	genitourinary	-0.03253	0.967994	0.041342	0.431378	logistic	445352	581	444771	2	0	0	0.327909	1	0.566893	LDL
Varicose veins of lower extremity, symptomtic	circulatory system	-0.01601	0.984121	0.02037	0.431993	logistic	453846	2444	451402	2	0	0	0.182516	1	0.66922	LDL
Ventral hernia	digestive	0.010264	1.01032	0.013129	0.434338	logistic	466474	5900	460574	2	7.7e-05	10.9208	1.1226	1	0.28936	LDL
Contracture of palmar fascia [Dupuytren's disease]	musculoskeletal	-0.01117	0.988891	0.014332	0.435706	logistic	450045	4952	445093	2	0.000753	49.4826	1.97951	1	0.159442	LDL
Cancer of other lymphoid, histiocytic tissue	neoplasms	0.014527	1.01463	0.018724	0.437813	logistic	476102	2883	473219	2	0.001076	23.5465	1.30798	1	0.25276	LDL
Other peripheral nerve disorders	neurological	0.004986	1.005	0.006451	0.439601	logistic	468907	26558	442349	2	0.00029	76.0831	4.18115	1	0.040876	LDL
Uveitis, noninfectious or NOS	sense organs	-0.02369	0.976593	0.030684	0.440168	logistic	458680	1063	457617	2	0.002934	60.6703	2.54261	1	0.110812	LDL
Diseases of spleen	hematopoietic	0.022443	1.0227	0.029098	0.440545	logistic	468774	1182	467592	2	0	0	0.806934	1	0.369028	LDL
Lipoma of skin and subcutaneous tissue	neoplasms	0.009799	1.00985	0.01274	0.44181	logistic	474544	6248	468296	2	0.000687	50.6678	2.02707	1	0.154518	LDL
Nausea and vomiting	symptoms	0.005283	1.0053	0.00687	0.441875	logistic	473875	22425	451450	2	0.00071	77.3988	4.42453	1	0.035426	LDL
Throat pain	respiratory	0.029105	1.02953	0.037958	0.443218	logistic	450061	698	449363	2	0	0	0.485608	1	0.485893	LDL
Rash and other nonspecific skin eruption	dermatologic	-0.00877	0.991271	0.011463	0.444388	logistic	461969	8070	453899	2	0.001059	79.757	4.93997	1	0.026243	LDL
Gastritis and duodenitis, NOS	digestive	0.018078	1.01824	0.023713	0.445834	logistic	469408	1810	467598	2	0	0	0.25263	1	0.61523	LDL
Fracture of pelvis	injuries & poisonings	0.019713	1.01991	0.026039	0.449017	logistic	468408	1481	466927	2	0	0	0.592278	1	0.44154	LDL
Renal failure NOS	genitourinary	0.014639	1.01475	0.019338	0.449042	logistic	463305	2708	460597	2	0	0	0.219285	1	0.639585	LDL
Alcoholic liver damage	mental disorders	-0.01643	0.983707	0.021712	0.449283	logistic	445484	2134	443350	2	0.003594	78.6971	4.69419	1	0.030265	LDL
Umbilical hernia	digestive	0.008896	1.00894	0.011772	0.449815	logistic	467308	7368	459940	2	0	0	0.024542	1	0.875515	LDL
Atrial flutter	circulatory system	0.014861	1.01497	0.019704	0.450718	logistic	451583	2694	448889	2	0.000592	42.9837	1.75388	1	0.185389	LDL
Other local infections of skin and subcutaneous tissue	dermatologic	0.013769	1.01386	0.018268	0.451036	logistic	462207	3023	459184	2	0	0	0.486218	1	0.485619	LDL
Disorder of skin and subcutaneous tissue NOS	dermatologic	0.00636	1.00638	0.008468	0.452585	logistic	470564	14685	455879	2	0	0	0.83294	1	0.361424	LDL
Wheezing	respiratory	0.024887	1.0252	0.03314	0.452688	logistic	447946	925	447021	2	0	0	0.768147	1	0.380791	LDL
Nerve root and plexus disorders	neurological	-0.02233	0.977917	0.029739	0.452729	logistic	458796	1132	457664	2	0	0	0.044207	1	0.833468	LDL
Disorders of coccyx	musculoskeletal	-0.03105	0.969431	0.041424	0.453575	logistic	456271	585	455686	2	0	0	0.05968	1	0.807002	LDL
Other acquired deformities of limbs	musculoskeletal	-0.01585	0.984278	0.0214	0.45899	logistic	462504	2195	460309	2	0	0	0.035808	1	0.849912	LDL
Appendicitis	digestive	-0.01927	0.980918	0.02602	0.459044	logistic	478176	1483	476693	2	0	0	0.928664	1	0.33521	LDL
Chronic renal failure [CKD]	genitourinary	-0.00571	0.994306	0.007727	0.459907	logistic	466693	18020	448673	2	0	0	0.003556	1	0.952445	LDL
Irregular menstrual cycle	genitourinary	-0.01703	0.983114	0.023088	0.460747	logistic	411322	1914	409408	2	0	0	0.070286	1	0.790921	LDL
Infection/inflammation of internal prosthetic device; implant; and graft	infectious diseases	-0.01151	0.988559	0.015619	0.461301	logistic	476805	4146	472659	2	0	0	0.169731	1	0.680351	LDL
Hepatomegaly	digestive	0.0257	1.02603	0.034913	0.461661	logistic	465795	829	464966	2	0	0	0.248618	1	0.61805	LDL
Phlebitis and thrombophlebitis of lower extremities	circulatory system	0.017857	1.01802	0.024296	0.462349	logistic	452980	1700	451280	2	0	0	0.219952	1	0.639077	LDL
Bacterial pneumonia	respiratory	0.006107	1.00613	0.008313	0.462554	logistic	462898	15162	447736	2	0.001105	55.1704	2.23067	1	0.135295	LDL
Intestinal disaccharidase deficiencies and disaccharide malabsorption	endocrine/metabolic	-0.02818	0.972212	0.039057	0.470565	logistic	477973	658	477315	2	0	0	0.1079	1	0.742548	LDL
Dyspepsia and other specified disorders of function of stomach	digestive	0.00589	1.00591	0.008186	0.471868	logistic	469691	15532	454159	2	0.000374	44.108	1.78916	1	0.181028	LDL
Spondylosis with myelopathy	musculoskeletal	0.023126	1.0234	0.032228	0.473008	logistic	456757	981	455776	2	0	0	0.01026	1	0.919319	LDL
Urinary incontinence	genitourinary	-0.00817	0.991867	0.011499	0.477581	logistic	463489	7926	455563	2	0	0	0.588167	1	0.443129	LDL
Excessive or frequent menstruation	genitourinary	-0.00769	0.99234	0.010829	0.477632	logistic	411471	9237	402234	2	0	0	0.037059	1	0.847345	LDL
Osteopenia or other disorder of bone and cartilage	musculoskeletal	-0.0142	0.985904	0.020046	0.478832	logistic	474231	2716	471515	2	0	0	0.055951	1	0.813015	LDL
Chemotherapy	neoplasms	0.006126	1.00615	0.008762	0.484448	logistic	470519	13486	457033	2	0	0	0.755504	1	0.384739	LDL
Candidiasis	infectious diseases	0.011008	1.01107	0.015846	0.487276	logistic	458546	4038	454508	2	0	0	0.008799	1	0.925266	LDL
Prostatitis	genitourinary	-0.01294	0.987142	0.018641	0.487537	logistic	445777	2905	442872	2	4.18e-05	3.90737	1.04066	1	0.307667	LDL
Ascites (non malignant)	digestive	-0.01185	0.988215	0.017124	0.488776	logistic	465855	3421	462434	2	0.010404	87.5243	8.01557	1	0.004638	LDL
Acute posthemorrhagic anemia	hematopoietic	0.026339	1.02669	0.038053	0.488832	logistic	462007	701	461306	2	0	0	0.094654	1	0.758342	LDL
Gingival and periodontal diseases	digestive	-0.00767	0.992357	0.011125	0.490438	logistic	465259	8941	456318	2	9.89e-05	24.3741	1.3223	1	0.25018	LDL
Mycoses	infectious diseases	-0.02763	0.972752	0.040304	0.49306	logistic	457975	614	457361	2	0	0	0.185689	1	0.666529	LDL
Disorders of external ear	sense organs	-0.01995	0.980251	0.029192	0.494408	logistic	463630	1176	462454	2	0	0	0.765996	1	0.381459	LDL
Contusion	injuries & poisonings	-0.00974	0.990306	0.014384	0.498265	logistic	473020	4923	468097	2	0.003053	87.9439	8.29453	1	0.003976	LDL
Fracture of hand or wrist	injuries & poisonings	0.011052	1.01111	0.016365	0.499453	logistic	469408	3779	465629	2	0	0	0.700569	1	0.402592	LDL
Sprains and strains of back and neck	injuries & poisonings	-0.01798	0.982183	0.026776	0.501948	logistic	463988	1438	462550	2	0	0	0.16759	1	0.682263	LDL
Sicca syndrome	dermatologic	-0.02098	0.979239	0.031503	0.505436	logistic	461438	1014	460424	2	0	0	0.180988	1	0.670526	LDL
Mechanical complication of unspecified genitourinary device, implant, and graft	injuries & poisonings	0.014533	1.01464	0.021941	0.507717	logistic	474057	2092	471965	2	0	0	0.021445	1	0.883573	LDL
Ulcerative colitis	digestive	-0.00967	0.990373	0.014615	0.508018	logistic	456198	4747	451451	2	0	0	0.924337	1	0.336339	LDL
Rheumatoid arthritis	musculoskeletal	-0.00821	0.991828	0.012435	0.509315	logistic	472102	6574	465528	2	0.001343	73.804	3.81738	1	0.050724	LDL
Diseases of lips	digestive	0.019782	1.01998	0.03009	0.510909	logistic	472585	1107	471478	2	0	0	0.099551	1	0.752369	LDL
Osteoarthrosis NOS	musculoskeletal	-0.00349	0.996521	0.005379	0.517057	logistic	465048	42962	422086	2	0	0	0.11775	1	0.731488	LDL
Other abnormal blood chemistry	symptoms	-0.01084	0.989221	0.016748	0.517581	logistic	472940	3716	469224	2	0.001566	68.0125	3.12622	1	0.077042	LDL
Bronchiectasis	respiratory	0.009664	1.00971	0.015031	0.520272	logistic	455310	4502	450808	2	0.006319	63.6568	2.75154	1	0.097161	LDL
Cancer of tongue	neoplasms	0.024469	1.02477	0.038199	0.521798	logistic	476815	687	476128	2	0	0	0.345283	1	0.556795	LDL
Insomnia	neurological	-0.00751	0.992516	0.011735	0.522063	logistic	454461	9042	445419	2	0.004045	75.1061	4.01706	1	0.045042	LDL
Chondrocalcinosis	endocrine/metabolic	-0.02187	0.978371	0.034272	0.52346	logistic	471842	856	470986	2	0	0	0.107194	1	0.743361	LDL
Multiple myeloma	neoplasms	0.017918	1.01808	0.028134	0.524196	logistic	476110	1270	474840	2	0	0	0.121481	1	0.727434	LDL
Stricture and stenosis of esophagus	digestive	0.010276	1.01033	0.016143	0.524424	logistic	446380	3874	442506	2	0.001388	56.5776	2.30296	1	0.129128	LDL
Lymphoid leukemia, chronic	neoplasms	-0.01807	0.982092	0.028428	0.525001	logistic	476289	1251	475038	2	0	0	0.79083	1	0.373849	LDL
Other diseases of blood and blood-forming organs	hematopoietic	-0.0141	0.986001	0.022261	0.526539	logistic	468884	2025	466859	2	0	0	0.249531	1	0.617406	LDL
Hemoptysis	respiratory	0.010798	1.01086	0.017082	0.527311	logistic	477734	3458	474276	2	0	0	0.949484	1	0.329851	LDL
Vitamin deficiency	endocrine/metabolic	0.008532	1.00857	0.013562	0.529274	logistic	461323	5515	455808	2	0.003223	59.633	2.47727	1	0.115502	LDL
Thrombocytopenia	hematopoietic	-0.00903	0.991015	0.014375	0.530067	logistic	467188	4950	462238	2	0.000862	65.1157	2.86662	1	0.090435	LDL
Pain and other symptoms associated with female genital organs	genitourinary	-0.01273	0.987355	0.020373	0.532196	logistic	413203	2466	410737	2	0	0	0.182023	1	0.669641	LDL
Other disorders of bone and cartilage	musculoskeletal	-0.01219	0.987881	0.019716	0.536296	logistic	459976	2594	457382	2	0	0	0.134486	1	0.713825	LDL
Other mental disorder	mental disorders	-0.00965	0.990401	0.015599	0.536354	logistic	441157	4863	436294	2	0.004528	82.147	5.60129	1	0.017947	LDL
Primary hypercoagulable state	hematopoietic	-0.02524	0.975078	0.040889	0.537079	logistic	465741	597	465144	2	0	0	0.000181	1	0.989259	LDL
Other disorders of male genital organs	genitourinary	-0.00896	0.991077	0.01457	0.538465	logistic	439500	4804	434696	2	0.003568	86.4049	7.35558	1	0.006685	LDL
Other disorders of metabolism	endocrine/metabolic	0.013719	1.01381	0.022318	0.538746	logistic	474565	2019	472546	2	0	0	0.599133	1	0.438909	LDL
Primary pulmonary hypertension	circulatory system	-0.02168	0.978556	0.03572	0.543953	logistic	472979	786	472193	2	0	0	0.002172	1	0.962831	LDL
Cataract	sense organs	-0.00298	0.997028	0.004908	0.544214	logistic	455224	53628	401596	2	5.18e-06	5.78685	1.06142	1	0.302891	LDL
Chronic prostatitis	genitourinary	0.013992	1.01409	0.023104	0.544766	logistic	445732	1897	443835	2	0	0	0.074259	1	0.785233	LDL
Complication due to other implant and internal device	injuries & poisonings	-0.02448	0.975822	0.040705	0.547644	logistic	474112	604	473508	2	0	0	0.00837	1	0.927104	LDL
Nevus, non-neoplastic	neoplasms	0.013214	1.0133	0.022078	0.549489	logistic	463248	2097	461151	2	0	0	0.397973	1	0.528138	LDL
Vaginitis and vulvovaginitis	genitourinary	0.017158	1.01731	0.028703	0.549989	logistic	413216	1277	411939	2	0	0	0.729279	1	0.393117	LDL
Facial nerve disorders [CN7]	neurological	0.013935	1.01403	0.023355	0.550729	logistic	459045	1846	457199	2	0	0	0.039181	1	0.843091	LDL
Other disorders of stomach and duodenum	digestive	-0.00748	0.992545	0.012585	0.55213	logistic	469060	6412	462648	2	0	0	0.724806	1	0.394572	LDL
Actinic keratosis	dermatologic	0.005372	1.00539	0.009075	0.553883	logistic	466538	15410	451128	2	0	0	0.858946	1	0.354034	LDL
Synovitis and tenosynovitis	musculoskeletal	0.008738	1.00878	0.014777	0.554301	logistic	451845	4786	447059	2	0	0	0.038237	1	0.844968	LDL
Sarcoidosis	dermatologic	-0.01853	0.981641	0.031341	0.554366	logistic	461781	1017	460764	2	0.000753	20.1614	1.25253	1	0.26307	LDL
Nonspecific abnormal findings on radiological and other examination of biliary tract	digestive	0.020979	1.0212	0.035485	0.554377	logistic	473911	801	473110	2	0.001158	20.8569	1.26353	1	0.260983	LDL
Other symptoms/disorders or the urinary system	genitourinary	0.004647	1.00466	0.007913	0.557056	logistic	461101	16757	444344	2	0	0	0.07227	1	0.788059	LDL
Swelling, mass, or lump in head and neck [Space-occupying lesion, intracranial NOS]	mental disorders	0.01201	1.01208	0.020628	0.560416	logistic	476513	2376	474137	2	0.000281	24.4542	1.3237	1	0.249929	LDL
Nontoxic uninodular goiter	endocrine/metabolic	-0.01262	0.987456	0.021688	0.560548	logistic	467722	2187	465535	2	0	0	0.034734	1	0.852153	LDL
Other retinal disorders	sense organs	-0.00617	0.993845	0.01068	0.563235	logistic	452472	9053	443419	2	0	0	0.075252	1	0.783838	LDL
Other open wound of head and face	injuries & poisonings	0.022654	1.02291	0.039264	0.563962	logistic	468760	652	468108	2	0	0	0.094561	1	0.758457	LDL
Duodenal ulcer	digestive	0.008951	1.00899	0.015601	0.566163	logistic	475481	4172	471309	2	0.001255	31.8294	1.46691	1	0.225834	LDL
Hemiplegia	neurological	0.009849	1.0099	0.017324	0.56968	logistic	464929	3365	461564	2	0	0	0.025744	1	0.872528	LDL
Dental caries	digestive	-0.00511	0.994904	0.009029	0.571536	logistic	468436	14022	454414	2	0	0	0.125403	1	0.723247	LDL
Type 2 diabetes with ophthalmic manifestations	endocrine/metabolic	-0.00801	0.992021	0.014252	0.574083	logistic	450445	5174	445271	2	0	0	0.307097	1	0.579467	LDL
Cancer of connective tissue	neoplasms	0.022619	1.02288	0.040286	0.574482	logistic	478383	617	477766	2	0	0	0.450873	1	0.501921	LDL
Prolapse of vaginal walls	genitourinary	-0.0059	0.994121	0.01052	0.575143	logistic	414056	9510	404546	2	0.002734	39.6311	1.65648	1	0.198079	LDL
Other acquired musculoskeletal deformity	musculoskeletal	-0.00945	0.990597	0.016862	0.575295	logistic	462581	3544	459037	2	0.000267	17.2221	1.20805	1	0.271718	LDL
Other diseases of the teeth and supporting structures	digestive	-0.00546	0.994551	0.009767	0.57586	logistic	466648	11682	454966	2	0	0	0.061188	1	0.804628	LDL
Personal history of diseases of digestive system	digestive	-0.00343	0.99658	0.006126	0.575968	logistic	455745	28937	426808	2	0.002938	46.5681	1.87154	1	0.171299	LDL
Anxiety disorders	mental disorders	0.004318	1.00433	0.007786	0.579174	logistic	437644	17239	420405	2	0	0	0.194587	1	0.659126	LDL
Uterine leiomyoma	neoplasms	0.005292	1.00531	0.009546	0.579317	logistic	413257	11632	401625	2	0.006977	75.7276	4.1199	1	0.042382	LDL
Secondary malignant neoplasm of liver	neoplasms	-0.00729	0.992741	0.013161	0.579911	logistic	469287	5876	463411	2	0	0	0.341592	1	0.558912	LDL
Cystic mastopathy	genitourinary	0.017062	1.01721	0.030902	0.580854	logistic	412787	1067	411720	2	0	0	0.377791	1	0.538788	LDL
Viral Enteritis	infectious diseases	-0.01421	0.985891	0.026006	0.5848	logistic	476353	1484	474869	2	0	0	0.361282	1	0.547795	LDL
Cholangitis	digestive	-0.01472	0.985386	0.026979	0.585293	logistic	473878	1375	472503	2	0	0	0.805311	1	0.36951	LDL
Irregular menstrual bleeding	genitourinary	0.008842	1.00888	0.016481	0.59161	logistic	411237	3790	407447	2	0	0	0.932405	1	0.334239	LDL
Lymphadenitis	hematopoietic	-0.00715	0.992877	0.013377	0.593094	logistic	469832	5677	464155	2	0	0	0.107062	1	0.743514	LDL
Hemangioma and lymphangioma, any site	neoplasms	0.010463	1.01052	0.019641	0.594219	logistic	476150	2617	473533	2	0	0	0.135328	1	0.71297	LDL
Pulmonary heart disease	circulatory system	-0.01001	0.990035	0.018835	0.594931	logistic	473562	2830	470732	2	0.002478	73.7089	3.80356	1	0.051144	LDL
Disorders of muscle, ligament, and fascia	musculoskeletal	-0.02039	0.979815	0.038437	0.595749	logistic	449430	680	448750	2	0	0	0.006893	1	0.933833	LDL
Disorders of optic nerve and visual pathways	sense organs	-0.01674	0.983397	0.031769	0.598188	logistic	453831	1004	452827	2	0.008458	78.4407	4.63836	1	0.031265	LDL
Pyelonephritis	genitourinary	0.010165	1.01022	0.019341	0.599211	logistic	463021	2693	460328	2	0	0	0.280249	1	0.596538	LDL
Tinnitus	sense organs	-0.00585	0.994163	0.011144	0.599345	logistic	450354	10222	440132	2	0	0	0.135978	1	0.712313	LDL
Trigeminal nerve disorders [CN5]	neurological	0.015642	1.01577	0.030199	0.604488	logistic	458902	1107	457795	2	0	0	0.22531	1	0.635024	LDL
Other symptoms involving abdomen and pelvis	digestive	-0.00969	0.990361	0.018755	0.605541	logistic	465462	2870	462592	2	0	0	0.652931	1	0.419067	LDL
Other specified gastritis	digestive	-0.00428	0.995725	0.008334	0.607236	logistic	468781	15008	453773	2	0	0	0.300801	1	0.583381	LDL
Abnormal findings examination of lungs	respiratory	0.005774	1.00579	0.011246	0.607671	logistic	472832	8216	464616	2	0	0	0.936962	1	0.33306	LDL
Other disorders of lipoid metabolism	endocrine/metabolic	0.016925	1.01707	0.033302	0.611287	logistic	475185	915	474270	2	0	0	0.740521	1	0.389494	LDL
Myalgia and myositis unspecified	symptoms	-0.00669	0.993335	0.01316	0.611351	logistic	475082	6077	469005	2	0	0	0.136523	1	0.711762	LDL
Disorders of iris and ciliary body	sense organs	-0.0168	0.983344	0.03309	0.611743	logistic	453788	908	452880	2	0.003154	55.5145	2.24792	1	0.133794	LDL
Endocarditis	circulatory system	0.013656	1.01375	0.026989	0.612885	logistic	474159	1382	472777	2	0	0	0.042281	1	0.837085	LDL
Generalized convulsive epilepsy	neurological	-0.01789	0.98227	0.035365	0.612972	logistic	464853	798	464055	2	0	0	0.249664	1	0.617312	LDL
Urinary tract infection	genitourinary	-0.00323	0.99678	0.006407	0.614674	logistic	467465	26438	441027	2	0	0	0.000822	1	0.977125	LDL
Irregular menstrual cycle/bleeding	genitourinary	-0.00436	0.995652	0.008685	0.615873	logistic	411309	14761	396548	2	0	0	0.078981	1	0.778683	LDL
Gingivitis	digestive	0.01073	1.01079	0.021455	0.617001	logistic	460736	2297	458439	2	0	0	0.428646	1	0.512654	LDL
Hypertrophy of breast (Gynecomastia)	genitourinary	-0.01317	0.986919	0.026517	0.619505	logistic	475805	1427	474378	2	0.001087	41.4586	1.70819	1	0.19122	LDL
Other benign neoplasm of connective and other soft tissue	neoplasms	0.015785	1.01591	0.032259	0.624622	logistic	473901	973	472928	2	0.001855	39.4637	1.6519	1	0.1987	LDL
Methicillin sensitive Staphylococcus aureus	infectious diseases	0.007696	1.00773	0.01592	0.628791	logistic	471576	3991	467585	2	0.001483	51.1127	2.04552	1	0.152654	LDL
Diseases of the larynx and vocal cords	respiratory	-0.00758	0.992448	0.015779	0.630895	logistic	450336	4055	446281	2	0	0	0.902288	1	0.342169	LDL
Cyst and pseudocyst of pancreas	digestive	0.015002	1.01511	0.031414	0.632972	logistic	476865	1020	475845	2	0	0	0.046886	1	0.828573	LDL
Peripheral autonomic neuropathy	neurological	0.013034	1.01312	0.027407	0.634378	logistic	465766	1358	464408	2	0.001895	47.3613	1.89974	1	0.168107	LDL
Suicide or self-inflicted injury	mental disorders	0.018481	1.01865	0.039273	0.637948	logistic	437310	664	436646	2	0	0	0.110527	1	0.739545	LDL
Substance addiction and disorders	mental disorders	-0.00598	0.994037	0.012732	0.638521	logistic	451910	7851	444059	2	0	0	0.133114	1	0.715225	LDL
Acute gastritis	digestive	0.016971	1.01712	0.036354	0.64063	logistic	468648	753	467895	2	0.017238	81.0938	5.28928	1	0.021457	LDL
Optic atrophy	sense organs	-0.01885	0.981325	0.041035	0.64595	logistic	453975	598	453377	2	0	0	0.43826	1	0.507964	LDL
Personality disorders	mental disorders	-0.01009	0.989961	0.021977	0.646162	logistic	438680	2279	436401	2	0	0	0.069824	1	0.791593	LDL
Septicemia	infectious diseases	0.004369	1.00438	0.009722	0.653169	logistic	471940	10905	461035	2	0.000818	53.693	2.1595	1	0.14169	LDL
Kyphoscoliosis and scoliosis	musculoskeletal	-0.01091	0.989149	0.024437	0.655262	logistic	462531	1686	460845	2	0	0	0.088475	1	0.766124	LDL
Aphasia/speech disturbance	mental disorders	0.008415	1.00845	0.019051	0.658696	logistic	466252	2787	463465	2	0	0	0.032217	1	0.857552	LDL
Allergic rhinitis	respiratory	0.004178	1.00419	0.009473	0.659176	logistic	460852	13649	447203	2	0	0	0.405322	1	0.524354	LDL
Pathologic fracture	musculoskeletal	0.011386	1.01145	0.025822	0.659254	logistic	471994	1510	470484	2	0	0	0.02334	1	0.878576	LDL
Stricture/obstruction of ureter	genitourinary	-0.01025	0.989799	0.023347	0.660531	logistic	462864	1846	461018	2	0	0	0.269501	1	0.603667	LDL
Stiffness of joint	musculoskeletal	-0.01356	0.986529	0.031492	0.666701	logistic	466853	1020	465833	2	0.000766	26.2563	1.35605	1	0.244224	LDL
Sepsis	injuries & poisonings	0.004366	1.00438	0.010144	0.666896	logistic	477310	10001	467309	2	0.003225	71.4061	3.49725	1	0.061471	LDL
Rheumatism, unspecified and fibrositis	musculoskeletal	-0.01696	0.983185	0.039486	0.667571	logistic	449515	662	448853	2	0.011601	77.7665	4.49771	1	0.03394	LDL
Symptoms involving digestive system	digestive	-0.00284	0.997163	0.00667	0.670153	logistic	456266	23954	432312	2	0	0	0.124504	1	0.7242	LDL
Polymyalgia Rheumatica	musculoskeletal	0.007178	1.0072	0.017386	0.679687	logistic	478556	3357	475199	2	0	0	0.500094	1	0.479459	LDL
Cancer of mouth	neoplasms	0.012278	1.01235	0.029778	0.680108	logistic	476743	1136	475607	2	0.003088	43.1705	1.75965	1	0.184668	LDL
Other diseases of lung	respiratory	-0.00588	0.994133	0.014442	0.683699	logistic	475738	4930	470808	2	0.000194	31.7259	1.46468	1	0.226186	LDL
Liver abscess and sequelae of chronic liver disease	digestive	0.008713	1.00875	0.021393	0.683797	logistic	465743	2200	463543	2	0	0	0.24832	1	0.618261	LDL
Other intestinal obstruction	digestive	-0.00554	0.994473	0.01385	0.689015	logistic	456087	5289	450798	2	0	0	0.025349	1	0.873499	LDL
Chronic pulmonary heart disease	circulatory system	-0.00777	0.992263	0.019608	0.692023	logistic	473424	2618	470806	2	0.000525	33.6098	1.50625	1	0.219713	LDL
Disease of tricuspid valve	circulatory system	-0.01133	0.988735	0.028854	0.694604	logistic	469952	1212	468740	2	0.010296	74.3764	3.90265	1	0.04821	LDL
Neuralgia, neuritis, and radiculitis NOS	symptoms	-0.00824	0.991792	0.021561	0.70227	logistic	464279	2217	462062	2	0.001076	51.4111	2.05808	1	0.151401	LDL
Hypoglycemia	endocrine/metabolic	-0.00714	0.992887	0.018728	0.703064	logistic	444888	2868	442020	2	0.000922	46.2181	1.85936	1	0.172699	LDL
Rheumatoid arthritis and other inflammatory polyarthropathies	musculoskeletal	-0.00491	0.995104	0.012927	0.704204	logistic	470962	6089	464873	2	0	0	0.40426	1	0.524897	LDL
Fracture of tibia and fibula	injuries & poisonings	0.008082	1.00812	0.021329	0.70474	logistic	468795	2215	466580	2	0	0	0.366085	1	0.545146	LDL
Migrain with aura	neurological	-0.01293	0.987158	0.034455	0.707561	logistic	463003	855	462148	2	0	0	0.009315	1	0.923111	LDL
Cancer of larynx	neoplasms	0.014596	1.0147	0.03911	0.708994	logistic	476867	656	476211	2	0	0	0.146015	1	0.702373	LDL
Degenerative and vascular disorders of ear	sense organs	0.015656	1.01578	0.042107	0.71003	logistic	441560	577	440983	2	0.01492	79.8257	4.95681	1	0.025988	LDL
Hemorrhoids	circulatory system	0.002511	1.00251	0.006789	0.711481	logistic	459271	23301	435970	2	0	0	0.156768	1	0.69215	LDL
Benign neoplasm of other parts of digestive system	neoplasms	0.003551	1.00356	0.009765	0.716144	logistic	474692	10813	463879	2	0	0	0.076742	1	0.781763	LDL
Creatinine	Biomarkers & Measurements	0.171523	NA	0.475313	0.718202	linear	409160	NA	NA	2	0.427673	94.3645	17.7445	1	2.53e-05	LDL
Psoriasis vulgaris	dermatologic	0.00498	1.00499	0.013852	0.719208	logistic	462271	5333	456938	2	0.000158	27.6871	1.38288	1	0.239611	LDL
E. coli	infectious diseases	0.004657	1.00467	0.012974	0.719624	logistic	471331	6057	465274	2	0	0	0.006055	1	0.937975	LDL
Abnormal involuntary movements	neurological	0.00577	1.00579	0.016077	0.71968	logistic	467089	3956	463133	2	0.000812	61.1075	2.57119	1	0.108826	LDL
Peyronie's disease	genitourinary	-0.00985	0.990202	0.027539	0.720694	logistic	438597	1327	437270	2	0	0	0.149635	1	0.698884	LDL
Pneumoconiosis	respiratory	0.012723	1.0128	0.035614	0.720905	logistic	469939	795	469144	2	0	0	0.002927	1	0.956856	LDL
Rosacea	dermatologic	-0.00725	0.992775	0.020472	0.723171	logistic	463411	2477	460934	2	0	0	0.044877	1	0.83223	LDL
Torsion dystonia	neurological	-0.01361	0.98648	0.038629	0.724542	logistic	464935	669	464266	2	0	0	0.294345	1	0.587449	LDL
Neutropenia	hematopoietic	0.004548	1.00456	0.013095	0.728345	logistic	468998	5930	463068	2	0.001046	43.7636	1.77821	1	0.182369	LDL
Gastric ulcer	digestive	-0.00424	0.995767	0.012297	0.730138	logistic	475655	6738	468917	2	0	0	0.934712	1	0.333642	LDL
Other disorders of biliary tract	digestive	-0.0073	0.992726	0.021305	0.731835	logistic	473931	2227	471704	2	0.00236	40.6125	1.68386	1	0.194413	LDL
Platelet_count	Biomarkers & Measurements	-0.02858	NA	0.084223	0.734343	linear	416087	NA	NA	2	0.138904	84.4577	6.43405	1	0.011195	LDL
Dyspareunia	genitourinary	-0.00949	0.990553	0.028264	0.737006	logistic	413126	1277	411849	2	0.000341	6.69593	1.07177	1	0.300547	LDL
Cancer of oropharynx	neoplasms	0.013025	1.01311	0.039731	0.743036	logistic	476831	634	476197	2	0	0	0.294331	1	0.587458	LDL
Cellulitis and abscess of face/neck	dermatologic	0.013349	1.01344	0.041139	0.745565	logistic	462070	600	461470	2	0.00042	10.7411	1.12034	1	0.289846	LDL
Disorders of the pituitary gland and its hypothalamic control	endocrine/metabolic	0.008896	1.00893	0.027623	0.747419	logistic	469855	1314	468541	2	0.000832	14.4412	1.16879	1	0.279651	LDL
Cellulitis and abscess of fingers/toes	dermatologic	0.006972	1.007	0.021705	0.748058	logistic	462980	2166	460814	2	0	0	0.046799	1	0.82873	LDL
Psychosis	mental disorders	0.008325	1.00836	0.026132	0.750058	logistic	438095	1541	436554	2	0	0	0.018137	1	0.89287	LDL
Other disorders of intestine	digestive	0.003634	1.00364	0.011416	0.750235	logistic	471875	7840	464035	2	0.001661	53.9971	2.17378	1	0.140381	LDL
Dislocation	injuries & poisonings	-0.00639	0.993635	0.020075	0.750419	logistic	471880	2545	469335	2	0	0	0.008361	1	0.927143	LDL
Secondary malignancy of lymph nodes	neoplasms	-0.00314	0.996868	0.010031	0.754527	logistic	469742	10207	459535	2	0	0	0.328141	1	0.566756	LDL
Neoplasm of uncertain behavior of skin	neoplasms	0.004398	1.00441	0.014189	0.756579	logistic	467133	5679	461454	2	0	0	0.619225	1	0.431335	LDL
Mitral valve disease	circulatory system	-0.01181	0.988257	0.038882	0.761277	logistic	469881	664	469217	2	0	0	0.014068	1	0.905586	LDL
Aplastic anemia	hematopoietic	-0.00917	0.99087	0.0302	0.76134	logistic	461800	1101	460699	2	0	0	0.293798	1	0.587797	LDL
Urticaria	dermatologic	-0.00843	0.991607	0.028299	0.765824	logistic	458133	1272	456861	2	0	0	0.207617	1	0.648641	LDL
Other derangement of joint	musculoskeletal	0.007699	1.00773	0.026164	0.768549	logistic	467082	1471	465611	2	0	0	0.218218	1	0.640401	LDL
Contracture of joint	musculoskeletal	-0.01141	0.98866	0.038769	0.768618	logistic	462378	668	461710	2	0	0	0.018284	1	0.892439	LDL
Gout	endocrine/metabolic	-0.00298	0.997026	0.010168	0.769608	logistic	476304	10270	466034	2	0	0	0.400238	1	0.526966	LDL
Anemia in neoplastic disease	hematopoietic	-0.01027	0.989778	0.035223	0.770507	logistic	461779	810	460969	2	0	0	0.060159	1	0.806244	LDL
Subjective visual disturbances	sense organs	-0.00631	0.993709	0.021915	0.773357	logistic	465632	2089	463543	2	0.003561	78.1814	4.58324	1	0.032286	LDL
Melanomas of skin	neoplasms	-0.00411	0.995896	0.01438	0.774906	logistic	462768	4906	457862	2	0	0	0.40277	1	0.525662	LDL
Fracture of unspecified part of femur	injuries & poisonings	0.011133	1.0112	0.039271	0.776796	logistic	468438	646	467792	2	0.006112	58.8877	2.43236	1	0.118854	LDL
Chorioretinal scars	sense organs	0.008729	1.00877	0.030934	0.777796	logistic	454221	1065	453156	2	0	0	0.195427	1	0.658438	LDL
Empyema and pneumothorax	respiratory	-0.00572	0.994294	0.020406	0.77914	logistic	470020	2421	467599	2	0	0	0.254515	1	0.613914	LDL
Cerebral atherosclerosis	circulatory system	0.010269	1.01032	0.037073	0.781781	logistic	467237	727	466510	2	0	0	0.067108	1	0.795595	LDL
Bladder neck obstruction	genitourinary	-0.00496	0.995057	0.017907	0.78198	logistic	472205	3177	469028	2	0	0	0.26018	1	0.609997	LDL
Urinary obstruction	genitourinary	-0.01191	0.98816	0.044659	0.789705	logistic	460923	505	460418	2	0.000476	10.6195	1.11881	1	0.290174	LDL
Ovarian cyst	genitourinary	-0.00355	0.996459	0.013439	0.79183	logistic	411361	5724	405637	2	0.009159	78.9267	4.74534	1	0.029378	LDL
Disorders of uterus, NEC	genitourinary	-0.00404	0.995967	0.015337	0.79216	logistic	413458	4362	409096	2	0	0	0.829938	1	0.36229	LDL
Mood disorders	mental disorders	0.001611	1.00161	0.006118	0.792249	logistic	442870	29690	413180	2	0	0	0.1405	1	0.707785	LDL
Fracture of patella	injuries & poisonings	0.00876	1.0088	0.033995	0.79666	logistic	468519	864	467655	2	0.004172	58.7475	2.42409	1	0.119482	LDL
Corneal opacity	sense organs	0.007847	1.00788	0.030522	0.797114	logistic	454247	1094	453153	2	0.001845	36.8744	1.58414	1	0.208165	LDL
Complex regional/central pain syndrome	neurological	-0.0101	0.98995	0.039885	0.800071	logistic	458887	637	458250	2	0	0	0.87909	1	0.348451	LDL
Secondary hypothyroidism	endocrine/metabolic	0.005047	1.00506	0.019949	0.800277	logistic	466821	2540	464281	2	0	0	0.001451	1	0.969618	LDL
Septal Deviations/Turbinate Hypertrophy	respiratory	-0.00309	0.996914	0.012231	0.800501	logistic	451425	6821	444604	2	0	0	0.192373	1	0.660949	LDL
Fracture of unspecified bones	injuries & poisonings	-0.0068	0.99322	0.02701	0.801141	logistic	469322	1393	467929	2	0	0	0.21418	1	0.64351	LDL
Calculus of kidney	genitourinary	-0.0027	0.997303	0.010811	0.802751	logistic	475173	8884	466289	2	0	0	0.166903	1	0.682879	LDL
Hydronephrosis	genitourinary	0.005071	1.00508	0.020341	0.803147	logistic	471910	2438	469472	2	0	0	0.06886	1	0.793004	LDL
Bursitis disorders	musculoskeletal	0.008163	1.0082	0.032994	0.804586	logistic	450018	935	449083	2	0.006033	62.5771	2.67216	1	0.102117	LDL
Other specified diseases of hair and hair follicles	dermatologic	-0.00722	0.99281	0.029374	0.805933	logistic	466209	1182	465027	2	0	0	0.003914	1	0.950117	LDL
Eustachian tube disorders	sense organs	0.007613	1.00764	0.031027	0.80618	logistic	469930	1055	468875	2	0	0	0.113948	1	0.735693	LDL
Acquired deformities of finger	musculoskeletal	0.010824	1.01088	0.044318	0.807056	logistic	462324	512	461812	2	0	0	0.139594	1	0.708685	LDL
Regional enteritis	digestive	-0.00465	0.995357	0.019191	0.80839	logistic	456050	2745	453305	2	0.001734	56.2917	2.28789	1	0.130387	LDL
Hypothyroidism NOS	endocrine/metabolic	-0.00144	0.998561	0.006041	0.811551	logistic	473884	30323	443561	2	0.000255	71.4165	3.49852	1	0.061424	LDL
Mineral deficiency NEC	endocrine/metabolic	-0.00766	0.992372	0.032503	0.813746	logistic	461240	951	460289	2	0	0	0.202163	1	0.65298	LDL
Superficial cellulitis and abscess	dermatologic	0.003311	1.00332	0.014078	0.814048	logistic	465921	5373	460548	2	0	0	0.360994	1	0.547955	LDL
Sprains and strains	injuries & poisonings	0.00378	1.00379	0.016438	0.818106	logistic	465908	3939	461969	2	0.000758	46.7891	1.87932	1	0.170412	LDL
Periapical abscess	digestive	0.004897	1.00491	0.021494	0.819771	logistic	459159	2189	456970	2	0.001187	49.1878	1.96803	1	0.160657	LDL
Fluid overload	endocrine/metabolic	0.004485	1.00449	0.020452	0.826421	logistic	464918	2410	462508	2	0	0	0.259596	1	0.610398	LDL
Sleep disorders	neurological	-0.00328	0.996727	0.015138	0.828539	logistic	448538	4602	443936	2	0	0	0.309209	1	0.578166	LDL
Ingrowing nail	dermatologic	0.003502	1.00351	0.016205	0.828927	logistic	468134	3983	464151	2	0	0	0.001907	1	0.965168	LDL
Protein-calorie malnutrition	endocrine/metabolic	0.006402	1.00642	0.029637	0.828987	logistic	461724	1149	460575	2	0	0	0.252792	1	0.615116	LDL
Sciatica	symptoms	0.002895	1.0029	0.013783	0.83361	logistic	465380	5443	459937	2	0	0	0.002983	1	0.956442	LDL
Migraine	neurological	-0.00224	0.997766	0.01075	0.835164	logistic	466634	9431	457203	2	0	0	0.77748	1	0.377913	LDL
Cervicalgia	symptoms	-0.00204	0.997959	0.009962	0.837512	logistic	473169	11800	461369	2	0	0	0.924179	1	0.33638	LDL
Open wounds of extremities	injuries & poisonings	0.004649	1.00466	0.023148	0.840816	logistic	469487	1887	467600	2	0	0	0.648859	1	0.420521	LDL
Decreased white blood cell count	hematopoietic	-0.00264	0.997363	0.01319	0.841349	logistic	468902	5834	463068	2	0	0	0.594949	1	0.440512	LDL
Phobia	mental disorders	-0.00485	0.99516	0.024311	0.841823	logistic	437064	1693	435371	2	0.008903	73.8815	3.82871	1	0.050382	LDL
Urethral stricture (not specified as infectious)	genitourinary	-0.00275	0.997252	0.013977	0.843926	logistic	472140	5201	466939	2	0	0	0.533632	1	0.465084	LDL
Seborrheic dermatitis	dermatologic	0.002188	1.00219	0.011167	0.844687	logistic	464776	8335	456441	2	0	0	0.765811	1	0.381516	LDL
Acute periodontitis	digestive	0.003411	1.00342	0.017489	0.845373	logistic	461945	3521	458424	2	0.005704	64.9255	2.85107	1	0.091313	LDL
Other headache syndromes	neurological	0.001452	1.00145	0.007514	0.846726	logistic	470369	19344	451025	2	1.27e-05	9.49741	1.10494	1	0.293184	LDL
Cancer of prostate	neoplasms	-0.00143	0.998567	0.007481	0.847997	logistic	450304	20225	430079	2	0	0	0.004679	1	0.945462	LDL
Meniere's disease	sense organs	0.005408	1.00542	0.02824	0.848127	logistic	464560	1263	463297	2	0	0	0.832491	1	0.361553	LDL
Inflammatory and toxic neuropathy	neurological	-0.00306	0.996949	0.016028	0.848801	logistic	470021	3950	466071	2	0.001073	61.7497	2.61436	1	0.105901	LDL
Effects radiation NOS	injuries & poisonings	0.001994	1.002	0.010526	0.849737	logistic	476345	9265	467080	2	0.00243	63.2987	2.7247	1	0.098807	LDL
Seborrheic keratosis	dermatologic	0.001696	1.0017	0.009225	0.854117	logistic	464492	13886	450606	2	0	0	0.53713	1	0.463625	LDL
Pruritus and related conditions	dermatologic	-0.00375	0.996259	0.020444	0.854545	logistic	475967	2438	473529	2	0.000191	18.5839	1.22826	1	0.267746	LDL
Chronic hepatitis	infectious diseases	0.006993	1.00702	0.038381	0.855424	logistic	462348	686	461662	2	0	0	0.376415	1	0.539528	LDL
Genu valgum or varum (acquired)	musculoskeletal	-0.00548	0.994534	0.030547	0.857596	logistic	462299	1072	461227	2	0	0	0.647882	1	0.420871	LDL
Lump or mass in breast	genitourinary	-0.00364	0.996366	0.020456	0.858739	logistic	475898	2436	473462	2	0.003912	77.3018	4.40563	1	0.03582	LDL
Malaise and fatigue	symptoms	-0.0016	0.998399	0.009058	0.859576	logistic	470897	12911	457986	2	0.000565	77.1406	4.37457	1	0.036479	LDL
Gastrointestinal complications	digestive	0.005624	1.00564	0.032276	0.861681	logistic	471614	965	470649	2	0.000375	7.31887	1.07897	1	0.298928	LDL
Corneal dystrophy	sense organs	0.005606	1.00562	0.034222	0.869884	logistic	453621	858	452763	2	0	0	0.035808	1	0.849913	LDL
Sebaceous cyst	dermatologic	0.001369	1.00137	0.008634	0.874048	logistic	467249	13942	453307	2	5.69e-05	22.9426	1.29773	1	0.254628	LDL
Postmenopausal atrophic vaginitis	genitourinary	-0.00363	0.99638	0.023299	0.876319	logistic	411376	1913	409463	2	0	0	0.766561	1	0.381283	LDL
Renal colic	genitourinary	-0.00325	0.996755	0.021126	0.877746	logistic	471390	2253	469137	2	0	0	3.51e-06	1	0.998505	LDL
Atrophic gastritis	digestive	0.005216	1.00523	0.033973	0.877967	logistic	468713	875	467838	2	0	0	0.187809	1	0.664747	LDL
Hallux rigidus	musculoskeletal	-0.00281	0.997195	0.018825	0.881387	logistic	462944	2851	460093	2	0.000731	45.4563	1.83339	1	0.175727	LDL
Hemorrhage of gastrointestinal tract	digestive	0.00136	1.00136	0.009175	0.882175	logistic	466279	12242	454037	2	0.002154	81.5573	5.42221	1	0.019882	LDL
Frequency of urination and polyuria	genitourinary	-0.00167	0.998335	0.011253	0.882265	logistic	463950	8265	455685	2	0	0	0.079019	1	0.778631	LDL
Diverticulosis	digestive	-0.00204	0.997962	0.01378	0.882324	logistic	461610	6162	455448	2	0.005658	60.9501	2.56082	1	0.109541	LDL
Epilepsy	neurological	0.003816	1.00382	0.025975	0.883196	logistic	465350	1493	463857	2	0.001517	52.2835	2.09571	1	0.147713	LDL
Bronchitis	respiratory	-0.00234	0.997666	0.016935	0.89027	logistic	457781	3657	454124	2	0	0	0.575136	1	0.448225	LDL
Fracture of ribs	injuries & poisonings	-0.00463	0.995381	0.033737	0.890846	logistic	468820	887	467933	2	0	0	0.008995	1	0.924439	LDL
Symptoms and disorders of the joints	musculoskeletal	-0.00178	0.998222	0.013024	0.891304	logistic	467121	5975	461146	2	0	0	0.861581	1	0.353297	LDL
Urea	Biomarkers & Measurements	-0.00029	NA	0.002143	0.892484	linear	409045	NA	NA	2	0.156026	86.7538	7.54936	1	0.006003	LDL
Radiotherapy	neoplasms	0.002277	1.00228	0.01711	0.894115	logistic	469724	3463	466261	2	0.00115	53.1967	2.1366	1	0.14382	LDL
Alteration of consciousness	mental disorders	-0.00408	0.995927	0.030722	0.894302	logistic	465710	1068	464642	2	0	0	0.156619	1	0.692288	LDL
Fracture of humerus	injuries & poisonings	-0.00235	0.997651	0.018217	0.89728	logistic	468681	3041	465640	2	0	0	0.325401	1	0.56838	LDL
Bacterial infection NOS	infectious diseases	-0.00102	0.998977	0.008159	0.900136	logistic	471760	15693	456067	2	0	0	0.081303	1	0.775539	LDL
Corneal opacity and other disorders of cornea	sense organs	0.00263	1.00263	0.021331	0.90186	logistic	453487	2211	451276	2	0	0	0.006175	1	0.937365	LDL
Secondary malignancy of bone	neoplasms	0.001705	1.00171	0.0141	0.903781	logistic	469473	5109	464364	2	0	0	0.187857	1	0.664706	LDL
Pathological, developmental or recurrent dislocation	musculoskeletal	-0.0044	0.995611	0.036927	0.905181	logistic	466604	738	465866	2	0.000561	10.2282	1.11393	1	0.291228	LDL
Cystitis	genitourinary	0.001812	1.00181	0.015369	0.906135	logistic	462903	4293	458610	2	0	0	0.425681	1	0.514116	LDL
Otitis externa	sense organs	-0.00244	0.997559	0.020811	0.906505	logistic	464881	2371	462510	2	0	0	0.036104	1	0.8493	LDL
Fracture of ankle and foot	injuries & poisonings	-0.00217	0.997829	0.01857	0.906824	logistic	469211	2922	466289	2	0.002775	77.6388	4.47203	1	0.034454	LDL
Anisometropia	sense organs	-0.00401	0.995994	0.03438	0.907046	logistic	465169	856	464313	2	0	0	0.404559	1	0.524744	LDL
Dermatitis due to solar radiation	dermatologic	-0.00364	0.996366	0.03182	0.908914	logistic	457883	994	456889	2	0	0	0.179962	1	0.671406	LDL
Enthesopathy	musculoskeletal	-0.00087	0.999133	0.007674	0.909995	logistic	454543	18072	436471	2	0	0	0.004279	1	0.947844	LDL
Lack of coordination	neurological	0.003318	1.00332	0.029473	0.910379	logistic	465491	1157	464334	2	0	0	0.81214	1	0.367488	LDL
Cyst of kidney, acquired	genitourinary	-0.00168	0.998324	0.015461	0.913596	logistic	463620	4248	459372	2	0.002664	79.566	4.8938	1	0.026953	LDL
Fracture of clavicle or scapula	injuries & poisonings	0.002488	1.00249	0.022991	0.913836	logistic	468607	1913	466694	2	0.018429	90.4223	10.4409	1	0.001233	LDL
Mean_platelet_thrombocyte_volume	Biomarkers & Measurements	0.000178	NA	0.00171	0.917296	linear	414386	NA	NA	2	0.077705	79.7323	4.93396	1	0.026334	LDL
Separation of retinal layers	sense organs	-0.00248	0.997526	0.024337	0.918913	logistic	452235	1703	450532	2	0.013077	77.9124	4.52742	1	0.033356	LDL
Noninfectious gastroenteritis	digestive	0.000712	1.00071	0.007156	0.920733	logistic	457278	20540	436738	2	0	0	0.816199	1	0.366294	LDL
Calculus of ureter	genitourinary	0.001518	1.00152	0.015546	0.922202	logistic	472296	4199	468097	2	0.000244	27.2746	1.37504	1	0.240949	LDL
Paralysis/spasm of vocal cords or larynx	respiratory	0.00363	1.00364	0.040745	0.92902	logistic	449979	602	449377	2	0	0	0.952057	1	0.329196	LDL
Postinflammatory pulmonary fibrosis	respiratory	0.001666	1.00167	0.01901	0.930152	logistic	470257	2796	467461	2	0	0	0.443016	1	0.50567	LDL
Malignant neoplasm, other	neoplasms	0.000846	1.00085	0.009658	0.930229	logistic	469720	11143	458577	2	0	0	0.302746	1	0.582166	LDL
Diseases of white blood cells	hematopoietic	0.002203	1.00221	0.02602	0.932531	logistic	469150	1483	467667	2	0.00147	50.5768	2.02334	1	0.154898	LDL
Extrapyramidal disease and abnormal movement disorders	neurological	0.001699	1.0017	0.020226	0.933063	logistic	465472	2461	463011	2	0	0	0.175792	1	0.675015	LDL
Diseases of hair and hair follicles	dermatologic	-0.00312	0.996883	0.037539	0.933717	logistic	465245	711	464534	2	0	0	0.547878	1	0.459186	LDL
Epistaxis or throat hemorrhage	respiratory	-0.00119	0.998809	0.0145	0.934472	logistic	450849	4840	446009	2	0	0	0.001642	1	0.967676	LDL
Fracture of vertebral column without mention of spinal cord injury	injuries & poisonings	-0.00235	0.997653	0.031945	0.94137	logistic	468994	988	468006	2	0.000516	17.1581	1.20712	1	0.271904	LDL
Malignant neoplasm of testis	neoplasms	0.000783	1.00078	0.010817	0.942313	logistic	466010	8829	457181	2	0.003117	48.319	1.93495	1	0.164218	LDL
Joint/ligament sprain	injuries & poisonings	-0.00256	0.997445	0.035392	0.942379	logistic	463103	805	462298	2	0	0	0.032432	1	0.857082	LDL
Benign neoplasm of adrenal gland	neoplasms	0.002734	1.00274	0.038106	0.942804	logistic	477339	707	476632	2	0.027397	90.2061	10.2104	1	0.001397	LDL
Malignant neoplasm of female breast	neoplasms	0.00067	1.00067	0.009582	0.944221	logistic	413196	11568	401628	2	0	0	0.056951	1	0.811381	LDL
Cancer, suspected or other	neoplasms	-0.00066	0.99934	0.009738	0.94593	logistic	469465	10959	458506	2	0	0	0.362363	1	0.547197	LDL
Sialoadenitis	digestive	-0.00232	0.997683	0.036966	0.949968	logistic	472661	737	471924	2	0	0	0.038221	1	0.845	LDL
Other arthropathies	musculoskeletal	0.001741	1.00174	0.028996	0.952122	logistic	463976	1210	462766	2	0.000936	35.7451	1.5563	1	0.212208	LDL
Pathologic fracture of vertebrae	musculoskeletal	0.001769	1.00177	0.031317	0.95495	logistic	472010	1026	470984	2	0	0	0.000457	1	0.98294	LDL
Peripheral retinal degenerations	sense organs	-0.00171	0.998294	0.030349	0.955139	logistic	452918	1114	451804	2	0.002392	49.6296	1.98529	1	0.158834	LDL
Dysuria	genitourinary	0.001132	1.00113	0.020173	0.955266	logistic	461516	2492	459024	2	0	0	0.321947	1	0.57044	LDL
Other disorders of eyelids	sense organs	-0.0007	0.999303	0.012523	0.955614	logistic	458717	6511	452206	2	0	0	0.285656	1	0.593018	LDL
Secondary malignant neoplasm	neoplasms	-0.00041	0.999586	0.007667	0.956882	logistic	469376	17937	451439	2	0.000389	17.4317	1.21112	1	0.271111	LDL
Pericarditis	circulatory system	0.000996	1.001	0.019033	0.958252	logistic	474105	2777	471328	2	0.001246	39.0164	1.63979	1	0.200355	LDL
Osteoarthrosis, localized, secondary	musculoskeletal	-0.00098	0.99902	0.018999	0.958837	logistic	448110	2807	445303	2	0	0	0.341668	1	0.558868	LDL
Acute tonsillitis	respiratory	0.001685	1.00169	0.035073	0.961677	logistic	449985	814	449171	2	0	0	0.134873	1	0.713432	LDL
Cervical intraepithelial neoplasia [CIN] [Cervical dysplasia]	neoplasms	0.001013	1.00101	0.021339	0.96214	logistic	412858	2241	410617	2	0	0	0.219309	1	0.639567	LDL
Intestinal infection	infectious diseases	0.000618	1.00062	0.013123	0.962463	logistic	476374	5907	470467	2	0	0	0.003015	1	0.956213	LDL
Blindness and low vision	sense organs	-0.00086	0.99914	0.018498	0.962918	logistic	442015	3072	438943	2	0	0	0.161214	1	0.688041	LDL
Hyperparathyroidism	endocrine/metabolic	0.001017	1.00102	0.021897	0.96296	logistic	470278	2107	468171	2	0	0	0.19411	1	0.659517	LDL
Otalgia	sense organs	-0.00123	0.998775	0.028734	0.965962	logistic	469954	1233	468721	2	0	0	0.018185	1	0.892728	LDL
Cystic kidney disease	congenital anomalies	0.001059	1.00106	0.028063	0.969902	logistic	475894	1285	474609	2	0	0	0.45274	1	0.501037	LDL
Other disorders of synovium, tendon, and bursa	musculoskeletal	0.000317	1.00032	0.009017	0.971997	logistic	449394	12708	436686	2	0	0	0.072048	1	0.788377	LDL
Noninfectious disorders of lymphatic channels	circulatory system	-0.00068	0.999325	0.020989	0.974325	logistic	478224	2280	475944	2	0.000619	31.5698	1.46134	1	0.226717	LDL
Benign neoplasm of skin	neoplasms	-0.00027	0.999728	0.009408	0.976967	logistic	466231	11800	454431	2	0	0	0.281132	1	0.59596	LDL
Rupture of tendon, nontraumatic	musculoskeletal	-0.00032	0.999678	0.011831	0.978298	logistic	450728	7293	443435	2	0	0	0.526183	1	0.468216	LDL
Aseptic necrosis of bone	musculoskeletal	-0.0011	0.998896	0.040786	0.978394	logistic	459985	605	459380	2	0	0	0.038552	1	0.844339	LDL
Paraproteinemia	endocrine/metabolic	0.000607	1.00061	0.02926	0.983446	logistic	474981	1176	473805	2	0	0	0.189414	1	0.663405	LDL
Nonspecific abnormal findings in stool contents	digestive	-0.00028	0.999721	0.014597	0.984727	logistic	465911	4748	461163	2	0	0	0.183533	1	0.668355	LDL
Ptosis of eyelid	sense organs	0.000303	1.0003	0.015928	0.984831	logistic	459381	4027	455354	2	0	0	0.00036	1	0.984852	LDL
Raynaud's syndrome	circulatory system	0.000365	1.00036	0.019544	0.985118	logistic	465198	2635	462563	2	0	0	0.575606	1	0.44804	LDL
Aphakia and other disorders of lens	sense organs	-0.00047	0.99953	0.027357	0.986278	logistic	454384	1380	453004	2	0	0	0.378666	1	0.538318	LDL
Chronic sinusitis	respiratory	0.000178	1.00018	0.01153	0.987685	logistic	454525	8098	446427	2	0.000266	49.7898	1.99163	1	0.158171	LDL
Breast cancer [female]	neoplasms	-0.00014	0.999864	0.00914	0.988164	logistic	413059	12775	400284	2	0	0	0.009099	1	0.924005	LDL
Visual disturbances	sense organs	-8.39e-05	0.999916	0.011311	0.994085	logistic	466827	8011	458816	2	0	0	0.502386	1	0.478454	LDL
Corneal degenerations	sense organs	0.00014	1.00014	0.026048	0.9957	logistic	453573	1475	452098	2	0	0	0.775334	1	0.378572	LDL
Arrhythmia (cardiac) NOS	circulatory system	6.33e-05	1.00006	0.014189	0.99644	logistic	453528	5342	448186	2	0.000129	22.9829	1.29841	1	0.254503	LDL
Other paralytic syndromes	neurological	-0.0001	0.999899	0.025518	0.996837	logistic	465261	1551	463710	2	0	0	0.969528	1	0.324798	LDL
Conjunctivitis, infectious	sense organs	-6.05e-05	0.99994	0.025809	0.998131	logistic	459280	1543	457737	2	0	0	0.342379	1	0.558459	LDL
Type 2 diabetes	endocrine/metabolic	-0.19648	0.821616	0.005087	<1.0E-314	logistic	468355	50093	418262	2	0.000578	90.6526	10.6981	1	0.001072	HDL
BMI	Biomarkers & Measurements	-0.30623	NA	0.007292	<1.0E-314	linear	422316	NA	NA	2	0.010476	93.1301	14.5563	1	0.000136	HDL
Triglycerides	Biomarkers & Measurements	-0.17082	NA	0.00158	<1.0E-314	linear	408726	NA	NA	2	0.037139	93.485	15.3492	1	8.94e-05	HDL
Essential hypertension	circulatory system	-0.1122	0.893864	0.003404	3.29e-238	logistic	474181	162855	311326	2	0	0	0.740253	1	0.38958	HDL
Alanine_aminotransferase	Biomarkers & Measurements	-0.61757	NA	0.021534	6.98e-181	linear	409045	NA	NA	2	0	0	0.460302	1	0.497483	HDL
Coronary atherosclerosis	circulatory system	-0.14853	0.861971	0.005292	2.57e-173	logistic	470828	45025	425803	2	0	0	0.093329	1	0.759987	HDL
HbA1c	Biomarkers & Measurements	-0.25708	NA	0.010087	2.84e-143	linear	404379	NA	NA	2	0.033844	90.8603	10.9412	1	0.00094	HDL
Hypercholesterolemia	endocrine/metabolic	-0.114	0.892261	0.004543	6.01e-139	logistic	434788	61781	373007	2	0	0	0.034706	1	0.852213	HDL
Other chronic ischemic heart disease, unspecified	circulatory system	-0.14797	0.862454	0.005969	1.11e-135	logistic	464642	33149	431493	2	2.63e-05	21.3664	1.27172	1	0.259444	HDL
Angina pectoris	circulatory system	-0.1584	0.853507	0.006534	7.9e-130	logistic	457979	25846	432133	2	0.000611	72.5381	3.64141	1	0.056359	HDL
Hyperglyceridemia	endocrine/metabolic	-0.45487	0.634531	0.021743	3.51e-97	logistic	429284	2562	426722	2	0.01152	72.8648	3.68525	1	0.054896	HDL
Myocardial infarction	circulatory system	-0.15273	0.858363	0.007317	9.39e-97	logistic	459336	20414	438922	2	0.00011	38.3831	1.62293	1	0.202684	HDL
Red_blood_cell_erythrocyte_count	Biomarkers & Measurements	-0.01138	NA	0.000557	1.17e-92	linear	415892	NA	NA	2	0.25882	92.4585	13.2599	1	0.000271	HDL
Glucose	Biomarkers & Measurements	-0.03746	NA	0.00201	1.77e-77	linear	357420	NA	NA	2	0	0	0.546597	1	0.459712	HDL
White_blood_cell_leukocyte_count	Biomarkers & Measurements	-0.05661	NA	0.003262	1.77e-67	linear	415038	NA	NA	2	0.263064	92.2022	12.8242	1	0.000342	HDL
Haemoglobin_concentration	Biomarkers & Measurements	-0.02665	NA	0.00156	1.99e-65	linear	416091	NA	NA	2	0.327844	92.9189	14.122	1	0.000171	HDL
Overweight, obesity and other hyperalimentation	endocrine/metabolic	-0.10114	0.903803	0.005939	4.78e-65	logistic	450098	30706	419392	2	0.001897	92.3602	13.0893	1	0.000297	HDL
Mixed hyperlipidemia	endocrine/metabolic	-0.21194	0.809017	0.012879	7.53e-61	logistic	437271	10712	426559	2	0.005788	75.9454	4.15721	1	0.041458	HDL
Type 2 diabetes with ophthalmic manifestations	endocrine/metabolic	-0.23183	0.79308	0.014354	1.12e-58	logistic	450445	5174	445271	2	0.000436	51.3977	2.05752	1	0.151457	HDL
Chronic renal failure [CKD]	genitourinary	-0.11821	0.888511	0.007758	2.01e-52	logistic	466693	18020	448673	2	0.000469	72.0664	3.57992	1	0.058482	HDL
Neutrophill_count	Biomarkers & Measurements	-0.03394	NA	0.002236	4.73e-52	linear	411798	NA	NA	2	0.05567	75.4637	4.0756	1	0.043507	HDL
Type 1 diabetes	endocrine/metabolic	-0.20565	0.814117	0.014181	1.18e-47	logistic	449259	5114	444145	2	0	0	0.005695	1	0.939843	HDL
Unstable angina (intermediate coronary syndrome)	circulatory system	-0.16005	0.852098	0.011611	3.14e-43	logistic	456664	7651	449013	2	0.000423	46.7741	1.87878	1	0.170472	HDL
Peripheral vascular disease, unspecified	circulatory system	-0.14628	0.863919	0.010784	6.5e-42	logistic	469356	9278	460078	2	0.000736	75.8173	4.13518	1	0.042001	HDL
Chronic Kidney Disease, Stage III	genitourinary	-0.12419	0.883216	0.009223	2.51e-41	logistic	466595	12631	453964	2	0.000218	51.4019	2.05769	1	0.151439	HDL
Gout	endocrine/metabolic	-0.13244	0.875951	0.010212	1.83e-38	logistic	476304	10270	466034	2	0	0	0.44643	1	0.504035	HDL
Mean_corpuscular_haemoglobin_concentration	Biomarkers & Measurements	-0.02153	NA	0.001666	3.24e-38	linear	415859	NA	NA	2	0.252474	92.4593	13.2614	1	0.000271	HDL
Cholelithiasis	digestive	-0.0896	0.914295	0.007045	4.67e-37	logistic	475387	21337	454050	2	0	0	0.438912	1	0.507648	HDL
Hypothyroidism NOS	endocrine/metabolic	-0.07475	0.92798	0.006054	5.06e-35	logistic	473884	30323	443561	2	0.000371	78.3144	4.61136	1	0.031761	HDL
Abdominal aortic aneurysm	circulatory system	-0.19385	0.823781	0.016531	9.32e-32	logistic	466749	3854	462895	2	0.001056	65.7421	2.91904	1	0.08754	HDL
Acute renal failure	genitourinary	-0.08611	0.917489	0.007457	7.54e-31	logistic	466032	19299	446733	2	0.001388	87.5857	8.05522	1	0.004537	HDL
Haematocrit_percentage	Biomarkers & Measurements	-0.05096	NA	0.004591	1.26e-28	linear	416093	NA	NA	2	0.283997	92.1718	12.7744	1	0.000351	HDL
Hypertensive chronic kidney disease	circulatory system	-0.17618	0.838467	0.015972	2.73e-28	logistic	432520	4987	427533	2	0.00452	89.6143	9.62859	1	0.001916	HDL
Sleep apnea	neurological	-0.0779	0.925053	0.00761	1.36e-24	logistic	459550	21401	438149	2	9.86e-06	7.71378	1.08359	1	0.297897	HDL
Heart failure NOS	circulatory system	-0.10689	0.898621	0.010851	6.76e-23	logistic	468348	8853	459495	2	0	0	0.020016	1	0.887493	HDL
Circulatory disease NEC	circulatory system	-0.05504	0.946443	0.00585	5.01e-21	logistic	468972	32335	436637	2	0.000516	57.1176	2.33196	1	0.126742	HDL
Other chronic nonalcoholic liver disease	digestive	-0.10206	0.902972	0.011117	4.27e-20	logistic	467145	8282	458863	2	0	0	0.219952	1	0.639076	HDL
Esophagitis, GERD and related diseases	digestive	-0.0419	0.958962	0.004608	9.61e-20	logistic	446641	54900	391741	2	0	0	0.216077	1	0.642046	HDL
Red_blood_cell_erythrocyte_distribution_width	Biomarkers & Measurements	0.013592	NA	0.001507	1.89e-19	linear	413847	NA	NA	2	0.235117	92.1431	12.7277	1	0.00036	HDL
GERD	digestive	-0.0437	0.957236	0.004866	2.67e-19	logistic	468793	54067	414726	2	0	0	0.232867	1	0.629406	HDL
Celiac disease	digestive	-0.16848	0.844945	0.018875	4.4e-19	logistic	455750	2836	452914	2	0	0	0.017995	1	0.893288	HDL
Diseases of esophagus	digestive	-0.03988	0.960908	0.004535	1.46e-18	logistic	446069	57273	388796	2	0.001669	43.6029	1.77314	1	0.182994	HDL
Atherosclerosis of the extremities	circulatory system	-0.18635	0.829986	0.021834	1.41e-17	logistic	465527	2134	463393	2	0	0	0.523224	1	0.46947	HDL
Hypoglycemia	endocrine/metabolic	-0.15983	0.852285	0.018788	1.78e-17	logistic	444888	2868	442020	2	0	0	0.058431	1	0.808993	HDL
Atherosclerosis	circulatory system	-0.1808	0.834599	0.021431	3.26e-17	logistic	465186	2210	462976	2	0	0	0.330405	1	0.565421	HDL
Iron deficiency anemias, unspecified or not due to blood loss	hematopoietic	-0.06347	0.938502	0.007552	4.29e-17	logistic	464702	18480	446222	2	0	0	0.008695	1	0.925706	HDL
Back pain	symptoms	-0.0519	0.949422	0.006213	6.64e-17	logistic	470938	40101	430837	2	0.000384	82.9278	5.85746	1	0.015511	HDL
Cardiac conduction disorders	circulatory system	-0.07266	0.929917	0.008738	9.18e-17	logistic	450874	13864	437010	2	0.000396	37.2199	1.59286	1	0.206918	HDL
Shortness of breath	respiratory	-0.0643	0.93772	0.00777	1.28e-16	logistic	454368	18207	436161	2	0	0	0.590204	1	0.44234	HDL
Abdominal pain	symptoms	-0.04579	0.955242	0.005599	2.88e-16	logistic	470261	35459	434802	2	0	0	0.000904	1	0.976018	HDL
Other diseases of respiratory system, NEC	respiratory	-0.0635	0.938475	0.007776	3.18e-16	logistic	474246	17419	456827	2	0	0	0.197628	1	0.656642	HDL
Congestive heart failure (CHF) NOS	circulatory system	-0.09157	0.912498	0.011242	3.79e-16	logistic	470133	8432	461701	2	0	0	0.05586	1	0.813163	HDL
Chronic Kidney Disease, Stage IV	genitourinary	-0.18286	0.832886	0.022468	4e-16	logistic	463512	2032	461480	2	0	0	0.948696	1	0.330051	HDL
Other diseases of respiratory system, not elsewhere classified	respiratory	-0.06205	0.939836	0.007654	5.2e-16	logistic	474311	17997	456314	2	0	0	0.001034	1	0.974352	HDL
Cholelithiasis with other cholecystitis	digestive	-0.08867	0.915148	0.011056	1.06e-15	logistic	474079	8384	465695	2	0	0	0.158955	1	0.690121	HDL
Hypertensive heart disease	circulatory system	-0.18744	0.829075	0.023513	1.56e-15	logistic	431054	2132	428922	2	0	0	0.391501	1	0.531512	HDL
Other anemias	hematopoietic	-0.04731	0.953796	0.006081	7.28e-15	logistic	469524	29869	439655	2	0	0	0.491372	1	0.483316	HDL
Other acute and subacute forms of ischemic heart disease	circulatory system	-0.14555	0.864543	0.018731	7.8e-15	logistic	455460	2885	452575	2	0.02394	82.757	5.79945	1	0.016031	HDL
Chronic ulcer of leg or foot	dermatologic	-0.11854	0.888219	0.015269	8.28e-15	logistic	476176	4412	471764	2	0	0	0.296924	1	0.585817	HDL
Urinary tract infection	genitourinary	-0.04964	0.951575	0.00641	9.65e-15	logistic	467465	26438	441027	2	0	0	0.058643	1	0.808654	HDL
Bacterial infection NOS	infectious diseases	-0.06199	0.939891	0.008166	3.16e-14	logistic	471760	15693	456067	2	0	0	0.870205	1	0.350899	HDL
Osteoarthrosis NOS	musculoskeletal	-0.04041	0.960398	0.005391	6.59e-14	logistic	465048	42962	422086	2	0.000134	66.9536	3.02604	1	0.081938	HDL
Hypertensive heart and/or renal disease	circulatory system	-0.1558	0.855728	0.021181	1.9e-13	logistic	429521	2275	427246	2	0.009356	83.0818	5.91079	1	0.015048	HDL
Noninfectious gastroenteritis	digestive	-0.05149	0.949814	0.007159	6.4e-13	logistic	457278	20540	436738	2	0	0	0.287254	1	0.591986	HDL
Pneumonia	respiratory	-0.04737	0.953733	0.0066	7.11e-13	logistic	465532	24758	440774	2	0	0	0.5266	1	0.46804	HDL
Other forms of chronic heart disease	circulatory system	-0.08463	0.91885	0.011841	8.83e-13	logistic	456618	7353	449265	2	0	0	0.117826	1	0.731404	HDL
Other aneurysm	circulatory system	-0.11251	0.893589	0.015906	1.51e-12	logistic	465022	4042	460980	2	0	0	0.456737	1	0.499153	HDL
Mean_corpuscular_haemoglobin	Biomarkers & Measurements	0.020134	NA	0.002859	1.88e-12	linear	416065	NA	NA	2	0.312662	93.5384	15.4761	1	8.36e-05	HDL
Postoperative infection	infectious diseases	-0.08528	0.918255	0.012151	2.25e-12	logistic	477048	6898	470150	2	0	0	0.683051	1	0.408538	HDL
Chronic airway obstruction	respiratory	-0.04217	0.958709	0.006026	2.59e-12	logistic	466418	31859	434559	2	0.000106	55.7773	2.26128	1	0.132644	HDL
Dizziness and giddiness (Light-headedness and vertigo)	sense organs	-0.05839	0.94328	0.00836	2.86e-12	logistic	470908	15411	455497	2	0	0	0.640086	1	0.42368	HDL
Cerebrovascular disease	circulatory system	-0.05695	0.944644	0.008248	5.03e-12	logistic	467783	15578	452205	2	0	0	0.166379	1	0.68335	HDL
CRP	Biomarkers & Measurements	-0.04689	NA	0.006965	1.68e-11	linear	392203	NA	NA	2	0	0	0.530148	1	0.466545	HDL
Precordial pain	circulatory system	-0.08311	0.920251	0.01235	1.7e-11	logistic	455326	6677	448649	2	0.00374	48.6808	1.94859	1	0.162739	HDL
Occlusion and stenosis of precerebral arteries	circulatory system	-0.09632	0.908176	0.014343	1.88e-11	logistic	469755	5134	464621	2	0.000166	28.772	1.40394	1	0.236065	HDL
Nausea and vomiting	symptoms	-0.04555	0.955467	0.006869	3.31e-11	logistic	473875	22425	451450	2	0	0	0.853097	1	0.355678	HDL
Other peripheral nerve disorders	neurological	-0.04285	0.958051	0.006472	3.56e-11	logistic	468907	26558	442349	2	0	0	0.003119	1	0.955463	HDL
Aortic aneurysm	circulatory system	-0.10429	0.900966	0.015989	6.92e-11	logistic	465787	4020	461767	2	0.010702	93.3053	14.9371	1	0.000111	HDL
Acute pancreatitis	digestive	-0.10606	0.899371	0.016267	7.04e-11	logistic	477386	3826	473560	2	0.001613	65.8267	2.92626	1	0.087149	HDL
Monocyte_percentage	Biomarkers & Measurements	0.027268	NA	0.004193	7.82e-11	linear	412668	NA	NA	2	0.131329	87.4098	7.94269	1	0.004828	HDL
Osteoarthritis; localized	musculoskeletal	-0.02841	0.971988	0.004398	1.04e-10	logistic	455558	61920	393638	2	0	0	0.671698	1	0.41246	HDL
Stricture of artery	circulatory system	-0.16527	0.847664	0.025687	1.24e-10	logistic	465026	1530	463496	2	0	0	0.111398	1	0.738558	HDL
stress incontinence, female	genitourinary	-0.07712	0.925774	0.012078	1.71e-10	logistic	413270	7084	406186	2	0	0	0.546702	1	0.459668	HDL
Hypovolemia	endocrine/metabolic	-0.06547	0.936628	0.010329	2.33e-10	logistic	466547	9694	456853	2	0	0	0.027994	1	0.867122	HDL
Depression	mental disorders	-0.03469	0.965905	0.005562	4.46e-10	logistic	457535	43620	413915	2	0	0	0.043303	1	0.835155	HDL
Ingrowing nail	dermatologic	-0.1003	0.904567	0.016269	7.05e-10	logistic	468134	3983	464151	2	0	0	0.209283	1	0.64733	HDL
Pain in joint	musculoskeletal	-0.0389	0.961845	0.00633	7.96e-10	logistic	469561	46605	422956	2	0.000375	82.0571	5.57325	1	0.018237	HDL
Arterial embolism and thrombosis	circulatory system	-0.15285	0.858262	0.024966	9.23e-10	logistic	465091	1617	463474	2	0	0	0.144025	1	0.704312	HDL
Other disorders of the kidney and ureters	genitourinary	-0.06678	0.935401	0.010912	9.38e-10	logistic	464415	8692	455723	2	0	0	0.883973	1	0.347116	HDL
Other abnormal glucose	endocrine/metabolic	-0.09604	0.908427	0.015733	1.03e-09	logistic	451412	4469	446943	2	0	0	0.954285	1	0.328631	HDL
Septicemia	infectious diseases	-0.05908	0.942627	0.00974	1.31e-09	logistic	471940	10905	461035	2	0	0	0.283889	1	0.594163	HDL
Other disorders of arteries and arterioles	circulatory system	-0.12442	0.883009	0.020607	1.56e-09	logistic	465068	2381	462687	2	0.011631	75.731	4.12049	1	0.042367	HDL
Cataract	sense organs	-0.02944	0.970991	0.00492	2.19e-09	logistic	455224	53628	401596	2	0.000614	87.7746	8.17968	1	0.004236	HDL
Respiratory failure	respiratory	-0.073	0.929597	0.012336	3.26e-09	logistic	470888	6727	464161	2	0.001405	72.8914	3.68886	1	0.054777	HDL
Abnormal results of function study of liver	digestive	-0.05812	0.943535	0.009868	3.87e-09	logistic	469139	10698	458441	2	0.000628	73.9742	3.84234	1	0.049974	HDL
Hyperlipidemia	endocrine/metabolic	-0.14021	0.869178	0.023857	4.18e-09	logistic	469725	100984	368741	2	0.001082	94.9558	19.825	1	8.49e-06	HDL
Cholecystitis without cholelithiasis	digestive	-0.08667	0.916983	0.014835	5.16e-09	logistic	474444	4607	469837	2	0.003695	80.6422	5.16586	1	0.023035	HDL
Dermatophytosis of nail	infectious diseases	-0.0686	0.933702	0.011744	5.18e-09	logistic	466819	9122	457697	2	0	0	0.233555	1	0.6289	HDL
Left bundle branch block	circulatory system	-0.08622	0.917392	0.01483	6.1e-09	logistic	450460	4642	445818	2	0.001699	55.4982	2.2471	1	0.133865	HDL
Direct_bilirubin	Biomarkers & Measurements	0.008344	NA	0.001435	6.13e-09	linear	342100	NA	NA	2	0.0137	77.1072	4.36819	1	0.036616	HDL
Monocyte_count	Biomarkers & Measurements	-0.00198	NA	0.000343	7.54e-09	linear	411412	NA	NA	2	0.101904	84.5194	6.45969	1	0.011035	HDL
Major depressive disorder	mental disorders	-0.03293	0.967602	0.005748	1e-08	logistic	452517	38531	413986	2	0	0	0.034664	1	0.852302	HDL
Dementias	mental disorders	-0.08226	0.921029	0.014448	1.24e-08	logistic	466444	4961	461483	2	0.000194	22.1104	1.28387	1	0.257181	HDL
Peripheral enthesopathies and allied syndromes	musculoskeletal	-0.03692	0.963753	0.006489	1.28e-08	logistic	455263	25579	429684	2	0	0	0.918099	1	0.337975	HDL
Astigmatism	sense organs	-0.05372	0.947696	0.009474	1.43e-08	logistic	452478	15002	437476	2	0.001141	82.4806	5.70794	1	0.016888	HDL
Sepsis	injuries & poisonings	-0.05757	0.944056	0.010161	1.46e-08	logistic	477310	10001	467309	2	0	0	0.556048	1	0.455857	HDL
Cardiac pacemaker/device in situ	circulatory system	-0.07304	0.929565	0.01313	2.66e-08	logistic	450409	5966	444443	2	0	0	0.049108	1	0.824623	HDL
Epistaxis or throat hemorrhage	respiratory	-0.08044	0.922713	0.014513	2.98e-08	logistic	450849	4840	446009	2	0	0	0.116516	1	0.732844	HDL
Proteinuria	endocrine/metabolic	-0.13792	0.871172	0.02503	3.59e-08	logistic	475739	1643	474096	2	0	0	0.008065	1	0.928444	HDL
Other headache syndromes	neurological	-0.04148	0.959364	0.007533	3.65e-08	logistic	470369	19344	451025	2	0.000805	86.8075	7.58007	1	0.005902	HDL
Disorders of refraction and accommodation; blindness and low vision	sense organs	-0.04456	0.956416	0.008093	3.67e-08	logistic	451645	19031	432614	2	0.000893	87.1948	7.8093	1	0.005198	HDL
Enthesopathy	musculoskeletal	-0.04224	0.958642	0.007683	3.85e-08	logistic	454543	18072	436471	2	0	0	0.971295	1	0.324358	HDL
Osteoarthrosis, generalized	musculoskeletal	-0.04862	0.952544	0.008857	4.03e-08	logistic	448716	13293	435423	2	0	0	0.218238	1	0.640386	HDL
Bundle branch block	circulatory system	-0.07918	0.923872	0.014461	4.36e-08	logistic	450152	4891	445261	2	0	0	0.822661	1	0.364403	HDL
Personal history of diseases of digestive system	digestive	-0.03339	0.967157	0.00613	5.11e-08	logistic	455745	28937	426808	2	0	0	0.003661	1	0.951754	HDL
Hyperpotassemia	endocrine/metabolic	-0.08329	0.920082	0.015392	6.25e-08	logistic	466219	4349	461870	2	0.000172	25.0847	1.33484	1	0.247946	HDL
Diseases of pancreas	digestive	-0.07631	0.926528	0.014195	7.62e-08	logistic	476862	5039	471823	2	0	0	4.47e-05	1	0.994663	HDL
Obstructive chronic bronchitis	respiratory	-0.06037	0.941419	0.011236	7.77e-08	logistic	457314	8257	449057	2	0	0	0.440975	1	0.506652	HDL
Cerebral artery occlusion, with cerebral infarction	circulatory system	-0.0631	0.938851	0.011865	1.05e-07	logistic	468899	7332	461567	2	0.002061	84.0555	6.27176	1	0.012268	HDL
Cardiac pacemaker in situ	circulatory system	-0.06452	0.937521	0.012196	1.22e-07	logistic	451875	7083	444792	2	0	0	0.152354	1	0.696296	HDL
Senile cataract	sense organs	-0.0327	0.967832	0.006183	1.24e-07	logistic	465097	38862	426235	2	0.000947	92.3393	13.0536	1	0.000303	HDL
Mood disorders	mental disorders	-0.03237	0.968149	0.006127	1.27e-07	logistic	442870	29690	413180	2	0	0	0.303328	1	0.581804	HDL
Gouty arthropathy	endocrine/metabolic	-0.1428	0.86693	0.027101	1.37e-07	logistic	472712	1409	471303	2	0.003404	57.8201	2.3708	1	0.123624	HDL
Functional digestive disorders	digestive	-0.02767	0.972712	0.00527	1.52e-07	logistic	455946	40236	415710	2	0.003334	69.6051	3.29003	1	0.069702	HDL
Diaphragmatic hernia	digestive	-0.02649	0.973858	0.00505	1.56e-07	logistic	467736	44255	423481	2	0.000291	53.9481	2.17146	1	0.140592	HDL
Hypotension	circulatory system	-0.04384	0.957111	0.008363	1.59e-07	logistic	467670	15043	452627	2	0.001428	26.0034	1.35141	1	0.245031	HDL
Suppurative and unspecified otitis media	sense organs	-0.10593	0.899488	0.020249	1.68e-07	logistic	470603	2499	468104	2	0	0	0.531054	1	0.466164	HDL
Disorders of menstruation and other abnormal bleeding from female genital tract	genitourinary	-0.04236	0.958526	0.0081	1.7e-07	logistic	411357	17242	394115	2	0	0	0.045054	1	0.831905	HDL
Eosinophill_count	Biomarkers & Measurements	-0.00112	NA	0.000216	1.94e-07	linear	413281	NA	NA	2	0.103658	87.9185	8.27713	1	0.004015	HDL
Uterine leiomyoma	neoplasms	-0.04951	0.951694	0.009542	2.11e-07	logistic	413257	11632	401625	2	0.005173	69.8656	3.31847	1	0.068506	HDL
Excessive or frequent menstruation	genitourinary	-0.05557	0.945948	0.010808	2.73e-07	logistic	411471	9237	402234	2	0	0	0.080616	1	0.776465	HDL
Prolapse of vaginal walls	genitourinary	-0.05378	0.947643	0.010518	3.18e-07	logistic	414056	9510	404546	2	0	0	0.009084	1	0.924068	HDL
Orthostatic hypotension	circulatory system	-0.07023	0.932183	0.013833	3.84e-07	logistic	468658	5357	463301	2	0	0	0.383075	1	0.535962	HDL
Syncope and collapse	symptoms	-0.03793	0.962785	0.00748	3.98e-07	logistic	475613	18816	456797	2	0	0	0.376039	1	0.539731	HDL
Spinal stenosis of lumbar region	musculoskeletal	-0.0591	0.942614	0.011686	4.26e-07	logistic	458463	7612	450851	2	0	0	0.130962	1	0.717436	HDL
Abdominal hernia	digestive	-0.02388	0.976405	0.004729	4.45e-07	logistic	466166	51814	414352	2	0.001976	71.8583	3.55344	1	0.059422	HDL
Disturbance of skin sensation	dermatologic	-0.05521	0.946286	0.010952	4.63e-07	logistic	461561	8805	452756	2	0.000383	61.462	2.59484	1	0.107212	HDL
Benign neoplasm of colon	neoplasms	-0.0242	0.976092	0.004844	5.88e-07	logistic	469660	50110	419550	2	4.01e-05	38.183	1.61768	1	0.203416	HDL
Diseases of nail, NOS	dermatologic	-0.07649	0.926362	0.015413	6.96e-07	logistic	469292	4656	464636	2	0.00559	83.2327	5.96401	1	0.014601	HDL
Lymphocyte_percentage	Biomarkers & Measurements	-0.05734	NA	0.011561	7.07e-07	linear	412481	NA	NA	2	0.105081	84.4633	6.43637	1	0.011181	HDL
Myopia	sense organs	-0.05261	0.948746	0.010703	8.84e-07	logistic	447620	10270	437350	2	0.002242	89.6124	9.62688	1	0.001917	HDL
Chronic bronchitis	respiratory	-0.0597	0.942047	0.012198	9.87e-07	logistic	455579	6938	448641	2	0	0	0.010855	1	0.91702	HDL
Nonrheumatic aortic valve disorders	circulatory system	-0.05632	0.945235	0.011522	1.02e-06	logistic	471842	7855	463987	2	0.000602	63.0403	2.70565	1	0.099993	HDL
Cyst of kidney, acquired	genitourinary	-0.07545	0.927328	0.015532	1.19e-06	logistic	463620	4248	459372	2	0	0	0.489404	1	0.484194	HDL
Spinal stenosis	musculoskeletal	-0.05026	0.950984	0.010376	1.27e-06	logistic	458465	9645	448820	2	0.000361	54.486	2.19713	1	0.138268	HDL
Transient cerebral ischemia	circulatory system	-0.06124	0.9406	0.012647	1.28e-06	logistic	470191	6580	463611	2	0.000265	45.0248	1.819	1	0.177432	HDL
Anemia of chronic disease	hematopoietic	-0.11474	0.891599	0.023722	1.32e-06	logistic	462170	1808	460362	2	0.002271	61.5059	2.5978	1	0.107012	HDL
Cirrhosis of liver without mention of alcohol	digestive	-0.12086	0.886162	0.025045	1.4e-06	logistic	466892	1649	465243	2	0	0	0.474875	1	0.490753	HDL
Atrial fibrillation	circulatory system	-0.04605	0.954995	0.009579	1.53e-06	logistic	457665	12960	444705	2	0	0	0.13318	1	0.715157	HDL
Arterial embolism and thrombosis of lower extremity artery	circulatory system	-0.13882	0.870384	0.029144	1.9e-06	logistic	465189	1191	463998	2	0	0	0.618232	1	0.431705	HDL
Other symptoms/disorders or the urinary system	genitourinary	-0.03764	0.963057	0.007923	2.02e-06	logistic	461101	16757	444344	2	0	0	0.439237	1	0.507491	HDL
Other local infections of skin and subcutaneous tissue	dermatologic	-0.08645	0.917177	0.018284	2.26e-06	logistic	462207	3023	459184	2	0	0	0.312054	1	0.576423	HDL
Other specified cardiac dysrhythmias	circulatory system	-0.04773	0.953394	0.010099	2.29e-06	logistic	454307	10576	443731	2	0	0	0.023205	1	0.878926	HDL
Vitamin B-complex deficiencies	endocrine/metabolic	-0.06814	0.934132	0.01445	2.41e-06	logistic	463691	4997	458694	2	0	0	0.560951	1	0.453877	HDL
Dependence on respirator [Ventilator] or supplemental oxygen	respiratory	-0.11022	0.895639	0.023421	2.53e-06	logistic	470337	1848	468489	2	0.004423	78.4694	4.64456	1	0.031152	HDL
Visual disturbances	sense organs	-0.05284	0.948533	0.011321	3.05e-06	logistic	466827	8011	458816	2	0	0	0.185367	1	0.666801	HDL
Irregular menstrual cycle/bleeding	genitourinary	-0.04036	0.960439	0.00867	3.23e-06	logistic	411309	14761	396548	2	0	0	0.26582	1	0.60615	HDL
Cancer of bronchus; lung	neoplasms	-0.06329	0.93867	0.013682	3.73e-06	logistic	478150	5465	472685	2	0.000159	21.7526	1.278	1	0.258272	HDL
Otitis media	sense organs	-0.08951	0.914384	0.019368	3.82e-06	logistic	469734	2694	467040	2	0.000162	12.6599	1.14495	1	0.284609	HDL
E. coli	infectious diseases	-0.05952	0.942219	0.012983	4.56e-06	logistic	471331	6057	465274	2	0.01073	76.0338	4.17255	1	0.041084	HDL
First degree AV block	circulatory system	-0.07741	0.925514	0.016948	4.94e-06	logistic	450597	3569	447028	2	0	0	0.104624	1	0.74635	HDL
Atrioventricular [AV] block	circulatory system	-0.06094	0.940881	0.013382	5.27e-06	logistic	450229	5748	444481	2	0.009902	77.5401	4.45238	1	0.034853	HDL
Atherosclerosis of native arteries of the extremities with intermittent claudication	circulatory system	-0.13017	0.877949	0.028719	5.83e-06	logistic	466020	1266	464754	2	0	0	0.800152	1	0.371048	HDL
Intestinal infection	infectious diseases	-0.05941	0.94232	0.013121	5.96e-06	logistic	476374	5907	470467	2	0	0	0.932931	1	0.334103	HDL
Splenomegaly	digestive	-0.13369	0.874859	0.029609	6.32e-06	logistic	465383	1152	464231	2	0.00794	77.2331	4.39234	1	0.036101	HDL
Portal hypertension	digestive	-0.12271	0.884524	0.027353	7.26e-06	logistic	465747	1345	464402	2	0	0	0.064727	1	0.799175	HDL
Sicca syndrome	dermatologic	-0.14085	0.86862	0.031523	7.89e-06	logistic	461438	1014	460424	2	0	0	0.105689	1	0.745107	HDL
Cholelithiasis with acute cholecystitis	digestive	-0.0848	0.918694	0.018987	7.96e-06	logistic	473934	2799	471135	2	0	0	0.00129	1	0.971346	HDL
Other disorders of gallbladder	digestive	-0.08578	0.917794	0.019272	8.54e-06	logistic	474106	2719	471387	2	0.001535	47.0565	1.88881	1	0.169337	HDL
Other abnormal blood chemistry	symptoms	-0.07449	0.928215	0.016792	9.15e-06	logistic	472940	3716	469224	2	0.000442	37.4413	1.5985	1	0.206116	HDL
Allergy/adverse effect of penicillin	injuries & poisonings	-0.02842	0.971977	0.006415	9.37e-06	logistic	471490	26163	445327	2	0	0	0.174031	1	0.676554	HDL
Other disorders of intestine	digestive	-0.05051	0.950749	0.011422	9.78e-06	logistic	471875	7840	464035	2	0	0	0.461725	1	0.496819	HDL
Cardiomegaly	circulatory system	-0.05022	0.95102	0.011409	1.07e-05	logistic	473702	7912	465790	2	0	0	0.869799	1	0.351011	HDL
Hematuria	genitourinary	-0.02986	0.97058	0.006819	1.19e-05	logistic	466080	22964	443116	2	0.000495	71.986	3.56964	1	0.058845	HDL
Complications of cardiac/vascular device, implant, and graft	injuries & poisonings	-0.18046	0.834888	0.041222	1.2e-05	logistic	474383	599	473784	2	0	0	0.003024	1	0.956146	HDL
Bacterial pneumonia	respiratory	-0.03604	0.964598	0.008324	1.49e-05	logistic	462898	15162	447736	2	0	0	0.199826	1	0.654861	HDL
Unspecified osteomyelitis	musculoskeletal	-0.14225	0.867402	0.033042	1.67e-05	logistic	464082	936	463146	2	0	0	0.100489	1	0.751244	HDL
Other specified gastritis	digestive	-0.03586	0.964772	0.008337	1.69e-05	logistic	468781	15008	453773	2	0	0	0.971579	1	0.324287	HDL
Synovitis and tenosynovitis	musculoskeletal	-0.06335	0.938618	0.014802	1.87e-05	logistic	451845	4786	447059	2	0.000819	65.0982	2.86518	1	0.090516	HDL
Sarcoidosis	dermatologic	-0.13444	0.874205	0.031458	1.92e-05	logistic	461781	1017	460764	2	0	0	0.555958	1	0.455894	HDL
Delirium dementia and amnestic and other cognitive disorders	mental disorders	-0.05478	0.946689	0.012824	1.94e-05	logistic	466104	6302	459802	2	0	0	0.01994	1	0.887705	HDL
Unspecified disorder of lipoid metabolism	endocrine/metabolic	-0.13603	0.872816	0.031957	2.08e-05	logistic	427165	993	426172	2	0.014416	85.8821	7.0832	1	0.007781	HDL
Fluid overload	endocrine/metabolic	-0.08727	0.916434	0.020502	2.08e-05	logistic	464918	2410	462508	2	0	0	0.843436	1	0.358416	HDL
Ptosis of eyelid	sense organs	-0.06748	0.934743	0.015941	2.3e-05	logistic	459381	4027	455354	2	0.000301	32.4938	1.48134	1	0.223564	HDL
Urinary incontinence	genitourinary	-0.04858	0.95258	0.011512	2.44e-05	logistic	463489	7926	455563	2	0	0	0.317128	1	0.573339	HDL
Chronic kidney disease, Stage I or II	genitourinary	-0.09234	0.911792	0.0219	2.48e-05	logistic	463519	2129	461390	2	0.001846	64.9074	2.8496	1	0.091396	HDL
Testicular hypofunction	endocrine/metabolic	-0.07464	0.92808	0.017736	2.57e-05	logistic	468134	3388	464746	2	0	0	0.464696	1	0.495438	HDL
Anal and rectal conditions	digestive	-0.02828	0.972113	0.006724	2.59e-05	logistic	472736	23463	449273	2	0	0	0.045708	1	0.830707	HDL
Other diseases of the teeth and supporting structures	digestive	-0.04114	0.959692	0.009807	2.72e-05	logistic	466648	11682	454966	2	0	0	0.840101	1	0.359368	HDL
Rheumatoid arthritis and other inflammatory polyarthropathies	musculoskeletal	-0.0541	0.947339	0.012947	2.93e-05	logistic	470962	6089	464873	2	0	0	0.229233	1	0.632093	HDL
Liver abscess and sequelae of chronic liver disease	digestive	-0.08924	0.914628	0.021401	3.05e-05	logistic	465743	2200	463543	2	0	0	0.213207	1	0.644265	HDL
Emphysema	respiratory	-0.05917	0.942543	0.014415	4.04e-05	logistic	456298	4935	451363	2	0.001059	64.0402	2.78088	1	0.095396	HDL
Edema	symptoms	-0.04003	0.960763	0.009753	4.06e-05	logistic	472883	11556	461327	2	0	0	0.08826	1	0.766401	HDL
Hypotension NOS	circulatory system	-0.03997	0.960814	0.009752	4.15e-05	logistic	469349	10880	458469	2	0.000945	73.0242	3.70702	1	0.054184	HDL
Malaise and fatigue	symptoms	-0.03717	0.963517	0.009094	4.37e-05	logistic	470897	12911	457986	2	0	0	0.01561	1	0.900571	HDL
Candidiasis	infectious diseases	-0.06476	0.93729	0.015874	4.51e-05	logistic	458546	4038	454508	2	0	0	0.000604	1	0.980394	HDL
Acidosis	endocrine/metabolic	-0.06836	0.933925	0.016805	4.75e-05	logistic	465174	3590	461584	2	0	0	0.00098	1	0.975028	HDL
Lymphadenitis	hematopoietic	-0.05424	0.947208	0.013395	5.14e-05	logistic	469832	5677	464155	2	0	0	0.000556	1	0.981182	HDL
Disorders of the autonomic nervous system	neurological	-0.15304	0.858098	0.037993	5.62e-05	logistic	464829	696	464133	2	0	0	0.015828	1	0.899884	HDL
Reflux esophagitis	digestive	-0.03143	0.96906	0.00786	6.38e-05	logistic	447250	16903	430347	2	0	0	0.235933	1	0.627159	HDL
Opiates and related narcotics causing adverse effects in therapeutic use	injuries & poisonings	-0.06322	0.938735	0.016191	9.43e-05	logistic	471490	3872	467618	2	0	0	0.001657	1	0.967535	HDL
Duodenitis	digestive	-0.03742	0.963275	0.009598	9.68e-05	logistic	468741	11214	457527	2	0.001024	32.357	1.47835	1	0.224033	HDL
Hemorrhoids	circulatory system	-0.02653	0.973819	0.006806	9.7e-05	logistic	459271	23301	435970	2	0	0	0.074284	1	0.785199	HDL
Obesity	endocrine/metabolic	-0.08706	0.916618	0.022503	0.000109233	logistic	468207	48677	419530	2	0.000956	94.3804	17.7947	1	2.46e-05	HDL
Hemiplegia	neurological	-0.06589	0.936231	0.017341	0.000144828	logistic	464929	3365	461564	2	0	0	0.454871	1	0.500031	HDL
Inflammatory and toxic neuropathy	neurological	-0.06084	0.940975	0.016048	0.000150007	logistic	470021	3950	466071	2	0.000473	41.5234	1.71009	1	0.190974	HDL
Symptoms involving digestive system	digestive	-0.02527	0.975045	0.006673	0.000152444	logistic	456266	23954	432312	2	0	0	0.124278	1	0.72444	HDL
Pleurisy; pleural effusion	respiratory	-0.03146	0.969033	0.008358	0.000167384	logistic	470906	15052	455854	2	0	0	0.307325	1	0.579327	HDL
Chronic pancreatitis	digestive	-0.1115	0.89449	0.029656	0.000170054	logistic	476967	1145	475822	2	0	0	0.363035	1	0.546826	HDL
Ventral hernia	digestive	-0.04907	0.952119	0.013138	0.000187992	logistic	466474	5900	460574	2	0	0	0.992353	1	0.319168	HDL
Internal derangement of knee	injuries & poisonings	-0.02731	0.973057	0.007336	0.000196845	logistic	472825	19485	453340	2	2.28e-06	1.01815	1.01029	1	0.314834	HDL
Anxiety disorder	mental disorders	-0.0246	0.975696	0.006628	0.000205637	logistic	450406	29092	421314	2	0	0	0.054697	1	0.815084	HDL
Palpitations	circulatory system	-0.04113	0.9597	0.01111	0.00021345	logistic	452306	8360	443946	2	0.000778	70.8496	3.43048	1	0.064003	HDL
Primary/intrinsic cardiomyopathies	circulatory system	-0.0569	0.94469	0.015436	0.00022784	logistic	475830	4329	471501	2	0.002228	82.2484	5.6333	1	0.017622	HDL
Blindness and low vision	sense organs	-0.0683	0.933977	0.018553	0.000231865	logistic	442015	3072	438943	2	0	0	0.569673	1	0.450389	HDL
Pulmonary collapse; interstitial and compensatory emphysema	respiratory	-0.04583	0.955208	0.012453	0.000233395	logistic	470116	6586	463530	2	0.000319	19.8727	1.24801	1	0.263932	HDL
Ascites (non malignant)	digestive	-0.06322	0.938733	0.017192	0.000235581	logistic	465855	3421	462434	2	0	0	0.162663	1	0.686716	HDL
Other disorders of synovium, tendon, and bursa	musculoskeletal	-0.03312	0.967423	0.009024	0.000242543	logistic	449394	12708	436686	2	0	0	0.024876	1	0.874676	HDL
Hypermetropia	sense organs	-0.04504	0.955959	0.012275	0.000243299	logistic	448385	8764	439621	2	0	0	0.489715	1	0.484054	HDL
Abnormal heart sounds	circulatory system	-0.05655	0.945022	0.015422	0.000245731	logistic	471264	4314	466950	2	0	0	0.924062	1	0.336411	HDL
Hearing loss	sense organs	-0.02551	0.974809	0.007017	0.000276882	logistic	459226	28985	430241	2	0.000573	85.3086	6.80672	1	0.009082	HDL
Abnormality of gait	neurological	-0.0517	0.949612	0.014243	0.00028353	logistic	470483	5642	464841	2	6.69e-05	2.47889	1.02542	1	0.311237	HDL
Alcoholism	mental disorders	0.033597	1.03417	0.009285	0.000296313	logistic	452279	13421	438858	2	0.001046	85.84	7.06212	1	0.007873	HDL
Peritoneal adhesions (postoperative) (postinfection)	digestive	-0.04476	0.956229	0.012415	0.00031187	logistic	471716	6605	465111	2	0	0	0.064081	1	0.800159	HDL
Benign neoplasm of other parts of digestive system	neoplasms	-0.03518	0.965433	0.009774	0.000319329	logistic	474692	10813	463879	2	0	0	0.300244	1	0.58373	HDL
Cellulitis and abscess of fingers/toes	dermatologic	-0.07825	0.924734	0.021765	0.000324186	logistic	462980	2166	460814	2	0.00445	82.1213	5.59326	1	0.01803	HDL
Alzheimer's disease	mental disorders	-0.07277	0.929811	0.020443	0.000371057	logistic	465784	2446	463338	2	0	0	0.756893	1	0.384303	HDL
Hypopotassemia	endocrine/metabolic	-0.04238	0.958509	0.011931	0.000382422	logistic	466830	7235	459595	2	0.000231	40.559	1.68234	1	0.194614	HDL
Thrombocytopenia	hematopoietic	-0.05107	0.950208	0.014404	0.000391327	logistic	467188	4950	462238	2	0.00051	52.3238	2.09748	1	0.147542	HDL
Fracture of radius and ulna	injuries & poisonings	0.037424	1.03813	0.010581	0.000404697	logistic	469026	9197	459829	2	0.000409	35.0898	1.54059	1	0.21453	HDL
End stage renal disease	genitourinary	-0.09622	0.90826	0.027286	0.00042103	logistic	463114	1362	461752	2	0.003892	70.0063	3.33404	1	0.06786	HDL
Cervicalgia	symptoms	-0.03499	0.965615	0.009987	0.000459337	logistic	473169	11800	461369	2	0.001173	77.1405	4.37455	1	0.036479	HDL
Osteoarthrosis, localized, primary	musculoskeletal	-0.02431	0.975985	0.007007	0.000521884	logistic	453299	22156	431143	2	9.51e-05	41.5009	1.70943	1	0.191059	HDL
Rheumatoid arthritis	musculoskeletal	-0.04318	0.957735	0.012471	0.000534523	logistic	472102	6574	465528	2	0.001049	68.4235	3.16692	1	0.075144	HDL
Symptoms involving nervous and musculoskeletal systems	symptoms	-0.03713	0.963554	0.010746	0.000550316	logistic	476970	8998	467972	2	0	0	0.049359	1	0.824182	HDL
Other disorders of eyelids	sense organs	-0.04326	0.957664	0.01253	0.000555917	logistic	458717	6511	452206	2	0	0	0.145553	1	0.702822	HDL
Acute bronchitis and bronchiolitis	respiratory	-0.05448	0.946974	0.015799	0.000563491	logistic	466265	4340	461925	2	0.002485	63.4656	2.73715	1	0.09804	HDL
Mean_platelet_thrombocyte_volume	Biomarkers & Measurements	-0.00589	NA	0.00171	0.000567889	linear	414386	NA	NA	2	0.174512	89.7479	9.75413	1	0.001789	HDL
Ventricular fibrillation and flutter	circulatory system	-0.12551	0.882051	0.036477	0.000580171	logistic	450144	756	449388	2	0	0	0.012914	1	0.909522	HDL
Acute upper respiratory infections of multiple or unspecified sites	respiratory	-0.03539	0.965224	0.010289	0.000581748	logistic	462506	10619	451887	2	0	0	0.068276	1	0.793864	HDL
Hereditary and idiopathic peripheral neuropathy	neurological	-0.05221	0.949131	0.015182	0.000584185	logistic	473457	4760	468697	2	0	0	0.522564	1	0.46975	HDL
Conjunctivitis, infectious	sense organs	-0.08873	0.915095	0.025868	0.000603512	logistic	459280	1543	457737	2	0	0	0.010965	1	0.916603	HDL
Urticaria	dermatologic	-0.09694	0.907607	0.028308	0.000615708	logistic	458133	1272	456861	2	0	0	0.036456	1	0.848577	HDL
Superficial cellulitis and abscess	dermatologic	-0.04809	0.953048	0.01414	0.000671259	logistic	465921	5373	460548	2	0.000136	19.5735	1.24337	1	0.264822	HDL
Sialoadenitis	digestive	-0.1257	0.881882	0.036964	0.000672478	logistic	472661	737	471924	2	0.001728	32.4778	1.48099	1	0.223619	HDL
Malignant neoplasm of kidney, except pelvis	neoplasms	-0.06907	0.933266	0.0204	0.000710269	logistic	476833	2438	474395	2	0	0	0.000288	1	0.986455	HDL
Facial nerve disorders [CN7]	neurological	-0.07837	0.924623	0.023389	0.00080624	logistic	459045	1846	457199	2	0	0	0.001098	1	0.973569	HDL
Hepatomegaly	digestive	-0.11589	0.890575	0.034915	0.000903016	logistic	465795	829	464966	2	0.006557	71.3251	3.48738	1	0.061839	HDL
Neurological disorders	mental disorders	-0.03468	0.965914	0.01046	0.000914237	logistic	466129	9436	456693	2	0.00417	83.0422	5.89701	1	0.015167	HDL
Renal failure NOS	genitourinary	-0.06424	0.937778	0.019388	0.000921402	logistic	463305	2708	460597	2	0.002936	73.7993	3.81669	1	0.050744	HDL
Vitamin D deficiency	endocrine/metabolic	-0.03367	0.966895	0.010181	0.000943903	logistic	468840	10851	457989	2	0	0	0.337043	1	0.561541	HDL
Thyrotoxicosis with or without goiter	endocrine/metabolic	-0.05505	0.946438	0.016651	0.000945717	logistic	466949	3661	463288	2	0.000449	29.9071	1.42668	1	0.232307	HDL
Vitamin deficiency	endocrine/metabolic	-0.04481	0.956182	0.01358	0.000968423	logistic	461323	5515	455808	2	8.77e-05	3.74143	1.03887	1	0.308085	HDL
Fracture of upper limb	injuries & poisonings	0.029575	1.03002	0.009058	0.00109449	logistic	468741	12642	456099	2	0	0	0.017733	1	0.894062	HDL
Cough	respiratory	-0.03017	0.970278	0.009267	0.00113063	logistic	455017	13165	441852	2	0	0	0.681427	1	0.409096	HDL
Methicillin sensitive Staphylococcus aureus	infectious diseases	-0.05152	0.949785	0.015925	0.00121586	logistic	471576	3991	467585	2	0.000241	14.5775	1.17065	1	0.279267	HDL
Viral infection	infectious diseases	-0.05242	0.948933	0.016309	0.00130955	logistic	462471	3797	458674	2	0	0	4.89e-05	1	0.994422	HDL
Cancer of kidney and renal pelvis	neoplasms	-0.06911	0.933226	0.02161	0.00138424	logistic	476484	2164	474320	2	0	0	0.109479	1	0.740739	HDL
Chronic osteomyelitis	musculoskeletal	-0.12817	0.879703	0.040116	0.00139827	logistic	463812	631	463181	2	0	0	0.140763	1	0.707523	HDL
Renal dialysis	genitourinary	-0.10034	0.904531	0.031693	0.00154594	logistic	462897	1005	461892	2	0.003272	54.5732	2.20134	1	0.137891	HDL
Retinal hemorrhage/ischemia	sense organs	-0.1211	0.885941	0.038355	0.00159139	logistic	452600	698	451902	2	0	0	0.054413	1	0.815555	HDL
Paroxysmal ventricular tachycardia	circulatory system	-0.06461	0.937429	0.020579	0.00169086	logistic	450711	2402	448309	2	0	0	0.007615	1	0.930463	HDL
Tachycardia NOS	circulatory system	-0.04058	0.960237	0.012992	0.00178919	logistic	451390	6045	445345	2	0	0	0.87807	1	0.348731	HDL
Dyspepsia and other specified disorders of function of stomach	digestive	-0.02556	0.974761	0.008188	0.00179669	logistic	469691	15532	454159	2	0.000184	28.1543	1.39187	1	0.238089	HDL
Altered mental status	mental disorders	-0.03925	0.961507	0.012626	0.00187677	logistic	466284	6430	459854	2	0	0	0.669529	1	0.413216	HDL
Urethral stricture (not specified as infectious)	genitourinary	-0.04341	0.957522	0.013984	0.00190868	logistic	472140	5201	466939	2	0	0	0.005941	1	0.938563	HDL
Hemorrhage of rectum and anus	digestive	-0.02442	0.975876	0.007871	0.00192008	logistic	466678	16802	449876	2	0	0	0.488812	1	0.484458	HDL
Anal and rectal polyp	digestive	-0.02808	0.972312	0.009057	0.00193336	logistic	471785	12626	459159	2	0.00446	71.5861	3.5194	1	0.060654	HDL
Acute tonsillitis	respiratory	-0.10898	0.89675	0.035163	0.00194048	logistic	449985	814	449171	2	0	0	0.000463	1	0.982836	HDL
Atrioventricular block, complete	circulatory system	-0.06808	0.934185	0.022012	0.00198238	logistic	450691	2111	448580	2	0	0	0.502381	1	0.478456	HDL
Rupture of tendon, nontraumatic	musculoskeletal	-0.03661	0.964052	0.011854	0.00201176	logistic	450728	7293	443435	2	0	0	0.129762	1	0.718679	HDL
Corns and callosities	dermatologic	-0.05315	0.948235	0.017237	0.00204422	logistic	467154	3644	463510	2	0.00746	85.3365	6.81967	1	0.009016	HDL
Calculus of lower urinary tract	genitourinary	-0.07684	0.926038	0.024919	0.00204499	logistic	471573	1632	469941	2	0.001542	43.5889	1.7727	1	0.183048	HDL
Other disorders of male genital organs	genitourinary	-0.04511	0.955889	0.014643	0.00206373	logistic	439500	4804	434696	2	0	0	0.25816	1	0.611387	HDL
Urinary calculus	genitourinary	-0.03164	0.968856	0.010276	0.00207792	logistic	472054	9739	462315	2	0	0	0.052192	1	0.819292	HDL
Pyelonephritis	genitourinary	-0.05918	0.942541	0.019355	0.00223301	logistic	463021	2693	460328	2	0.00132	36.8	1.58228	1	0.208433	HDL
Peripheral or central vertigo	sense organs	-0.06365	0.93833	0.020875	0.00229401	logistic	465508	2346	463162	2	0.000268	23.5434	1.30793	1	0.25277	HDL
Chronic tonsillitis and adenoiditis	respiratory	-0.08167	0.921572	0.026837	0.00233991	logistic	450085	1397	448688	2	0	0	0.13498	1	0.713323	HDL
Peripheral autonomic neuropathy	neurological	-0.08376	0.919654	0.027545	0.00235969	logistic	465766	1358	464408	2	0.021909	91.2059	11.3713	1	0.000746	HDL
Disorders of esophageal motility	digestive	-0.08296	0.920385	0.027339	0.0024086	logistic	446044	1347	444697	2	0.002616	47.9507	1.92125	1	0.165718	HDL
Alcohol-related disorders	mental disorders	0.025969	1.02631	0.008592	0.00250772	logistic	452599	15577	437022	2	0.000988	86.9001	7.63367	1	0.005729	HDL
Diplopia and disorders of binocular vision	sense organs	-0.0642	0.937821	0.021272	0.00254619	logistic	465723	2253	463470	2	0	0	0.019743	1	0.888257	HDL
Myalgia and myositis unspecified	symptoms	-0.03973	0.961047	0.013189	0.00259184	logistic	475082	6077	469005	2	0	0	0.909837	1	0.340158	HDL
Anaphylactic shock NOS	injuries & poisonings	-0.09398	0.910299	0.031275	0.00265601	logistic	457744	1030	456714	2	0.005657	67.5927	3.08572	1	0.078982	HDL
Other symptoms involving abdomen and pelvis	digestive	-0.05613	0.945416	0.018759	0.00276943	logistic	465462	2870	462592	2	0.001291	45.051	1.81987	1	0.177329	HDL
Otitis externa	sense organs	-0.06241	0.939498	0.020889	0.00281034	logistic	464881	2371	462510	2	0.000644	38.9897	1.63907	1	0.200453	HDL
Decubitus ulcer	dermatologic	-0.04704	0.954051	0.015939	0.00316515	logistic	474839	4006	470833	2	0	0	0.54749	1	0.459345	HDL
Migraine	neurological	-0.03176	0.968742	0.010773	0.00320022	logistic	466634	9431	457203	2	0.000267	52.2889	2.09595	1	0.14769	HDL
Other disorders of stomach and duodenum	digestive	-0.03697	0.963704	0.012601	0.00334549	logistic	469060	6412	462648	2	0.003453	77.6288	4.47004	1	0.034494	HDL
Symptoms affecting skin	dermatologic	-0.06217	0.939725	0.02125	0.00343822	logistic	457335	2233	455102	2	0.001205	27.3595	1.37664	1	0.240674	HDL
Other disorders of liver	digestive	-0.0452	0.955806	0.015463	0.00346466	logistic	466124	4243	461881	2	0.002991	75.8426	4.13951	1	0.041893	HDL
Regional enteritis	digestive	-0.05587	0.945666	0.019188	0.00359714	logistic	456050	2745	453305	2	0	0	0.001935	1	0.964914	HDL
Cholangitis	digestive	-0.07873	0.924292	0.027057	0.00361749	logistic	473878	1375	472503	2	0.001405	21.9051	1.28049	1	0.257807	HDL
Other and unspecified coagulation defects	hematopoietic	-0.08741	0.916301	0.030365	0.00399433	logistic	466012	1105	464907	2	0	0	0.302899	1	0.582071	HDL
Other disorders of biliary tract	digestive	-0.06125	0.940589	0.021289	0.00401446	logistic	473931	2227	471704	2	0	0	0.017088	1	0.895996	HDL
Spondylosis without myelopathy	musculoskeletal	-0.03043	0.970031	0.010687	0.00441104	logistic	462097	9572	452525	2	0	0	0.657555	1	0.417424	HDL
Acquired deformities of finger	musculoskeletal	0.125964	1.13424	0.044355	0.00451226	logistic	462324	512	461812	2	0	0	0.548911	1	0.458763	HDL
Cystitis	genitourinary	-0.04304	0.957877	0.015372	0.00511572	logistic	462903	4293	458610	2	0.009215	69.3728	3.26507	1	0.07077	HDL
Septal Deviations/Turbinate Hypertrophy	respiratory	-0.03426	0.966323	0.012248	0.00515684	logistic	451425	6821	444604	2	0	0	8.7e-05	1	0.992559	HDL
Arthropathy NOS	musculoskeletal	-0.04184	0.959022	0.015013	0.00531996	logistic	468101	4916	463185	2	0	0	0.562824	1	0.453125	HDL
Abnormal function study of cardiovascular system	circulatory system	-0.06932	0.933032	0.024952	0.00546978	logistic	467003	1631	465372	2	0	0	0.388303	1	0.533193	HDL
Secondary hypothyroidism	endocrine/metabolic	-0.05505	0.946436	0.019961	0.00581554	logistic	466821	2540	464281	2	8.72e-05	5.98016	1.0636	1	0.302394	HDL
Unequal leg length (acquired)	musculoskeletal	0.104571	1.11023	0.037956	0.00586783	logistic	462731	709	462022	2	0.001303	19.8755	1.24806	1	0.263924	HDL
Difficulty in walking	musculoskeletal	-0.05394	0.947487	0.019612	0.00595134	logistic	468593	2723	465870	2	0	0	0.008202	1	0.927836	HDL
Paraproteinemia	endocrine/metabolic	-0.08077	0.922403	0.02939	0.00599052	logistic	474981	1176	473805	2	0	0	0.149617	1	0.698902	HDL
Pernicious anemia	hematopoietic	-0.07356	0.929083	0.026777	0.00601316	logistic	461808	1405	460403	2	0	0	0.013021	1	0.909152	HDL
Agorophobia, social phobia, and panic disorder	mental disorders	-0.04487	0.956123	0.016348	0.00605947	logistic	439503	4247	435256	2	0	0	0.63656	1	0.424959	HDL
Nonspecific elevation of levels of transaminase or lactic acid dehydrogenase [LDH]	digestive	-0.10317	0.901971	0.037618	0.00609445	logistic	466062	720	465342	2	0	0	0.010667	1	0.917739	HDL
Malignant neoplasm of liver, primary	neoplasms	-0.11059	0.895308	0.040364	0.00614807	logistic	472920	621	472299	2	0	0	0.949145	1	0.329937	HDL
Other disorders of lipoid metabolism	endocrine/metabolic	-0.09068	0.913311	0.033419	0.00665981	logistic	475185	915	474270	2	0.007683	67.4814	3.07517	1	0.079497	HDL
Acute periodontitis	digestive	-0.04751	0.953602	0.017553	0.00679841	logistic	461945	3521	458424	2	0.001761	36.31	1.5701	1	0.210192	HDL
Amblyopia	sense organs	-0.05946	0.942271	0.021984	0.0068348	logistic	465578	2101	463477	2	0	0	0.26424	1	0.607222	HDL
Other disorders of eye	sense organs	-0.04626	0.954792	0.017192	0.00712535	logistic	453655	3427	450228	2	0	0	0.683353	1	0.408434	HDL
Hemoptysis	respiratory	-0.04589	0.955148	0.017104	0.00729759	logistic	477734	3458	474276	2	0	0	0.684095	1	0.40818	HDL
Paralytic strabismus	sense organs	-0.09898	0.905762	0.036966	0.00741637	logistic	453747	740	453007	2	0	0	0.383211	1	0.53589	HDL
Influenza	respiratory	-0.07341	0.929219	0.027556	0.00772033	logistic	462633	1326	461307	2	0	0	0.043739	1	0.83434	HDL
Sprains and strains of back and neck	injuries & poisonings	-0.07137	0.931115	0.026853	0.00786354	logistic	463988	1438	462550	2	0	0	0.821091	1	0.364861	HDL
Intestinal disaccharidase deficiencies and disaccharide malabsorption	endocrine/metabolic	-0.104	0.901226	0.039272	0.00809273	logistic	477973	658	477315	2	0.003676	51.7925	2.07437	1	0.149792	HDL
Alteration of consciousness	mental disorders	-0.08123	0.921977	0.03074	0.00822583	logistic	465710	1068	464642	2	0	0	0.002108	1	0.963384	HDL
Psoriatic arthropathy	dermatologic	-0.06768	0.93456	0.025621	0.00825268	logistic	460650	1540	459110	2	0	0	0.069037	1	0.792744	HDL
Chronic venous insufficiency [CVI]	circulatory system	-0.04902	0.952158	0.018574	0.00830525	logistic	455355	3143	452212	2	0.000345	23.8652	1.31346	1	0.251769	HDL
Aphakia and other disorders of lens	sense organs	-0.07232	0.930237	0.027449	0.0084261	logistic	454384	1380	453004	2	0	0	0.013581	1	0.907227	HDL
Cancer of bladder	neoplasms	-0.03969	0.961091	0.015109	0.00862261	logistic	476795	4488	472307	2	0	0	0.04645	1	0.829361	HDL
Posttraumatic stress disorder	mental disorders	-0.02813	0.972265	0.010745	0.00884958	logistic	451750	15222	436528	2	0.003716	72.0841	3.58218	1	0.058402	HDL
Bronchitis	respiratory	-0.04448	0.956498	0.016994	0.00886507	logistic	457781	3657	454124	2	0	0	0.620707	1	0.430785	HDL
Cystic kidney disease	congenital anomalies	-0.07315	0.929463	0.028188	0.00945756	logistic	475894	1285	474609	2	0.002972	64.8824	2.84757	1	0.091512	HDL
Develomental delays and disorders	mental disorders	-0.07436	0.928337	0.028657	0.00946225	logistic	474563	1224	473339	2	0	0	0.146465	1	0.701937	HDL
Iatrogenic hypotension	circulatory system	-0.09997	0.904864	0.038708	0.00980395	logistic	467695	673	467022	2	0	0	0.264403	1	0.607111	HDL
Symptoms and disorders of the joints	musculoskeletal	-0.03361	0.966945	0.013047	0.00998155	logistic	467121	5975	461146	2	0	0	0.002793	1	0.957849	HDL
Functional disorders of bladder	genitourinary	-0.04472	0.956262	0.017375	0.0100534	logistic	473047	3383	469664	2	0.000436	41.3982	1.70643	1	0.191449	HDL
Anxiety disorders	mental disorders	-0.02007	0.980134	0.007797	0.0100643	logistic	437644	17239	420405	2	0.002393	76.1055	4.18507	1	0.040782	HDL
Aphasia/speech disturbance	mental disorders	-0.04897	0.952214	0.019084	0.0102956	logistic	466252	2787	463465	2	0	0	0.189129	1	0.663643	HDL
Gram negative septicemia	infectious diseases	-0.10274	0.902365	0.040252	0.0106999	logistic	471292	621	470671	2	0	0	0.158441	1	0.690596	HDL
Umbilical hernia	digestive	-0.03008	0.970367	0.0118	0.0107984	logistic	467308	7368	459940	2	0	0	0.335909	1	0.5622	HDL
Abnormal involuntary movements	neurological	-0.04113	0.959702	0.016152	0.0108764	logistic	467089	3956	463133	2	0	0	0.265917	1	0.606084	HDL
Gastrointestinal complications	digestive	-0.08128	0.921932	0.032272	0.0117797	logistic	471614	965	470649	2	0.010318	68.8976	3.21519	1	0.072958	HDL
Calculus of ureter	genitourinary	-0.03897	0.961781	0.015547	0.0121966	logistic	472296	4199	468097	2	0	0	0.070967	1	0.789934	HDL
Paroxysmal tachycardia, unspecified	circulatory system	-0.03401	0.96656	0.013578	0.0122484	logistic	450150	5520	444630	2	0	0	0.887876	1	0.346053	HDL
Malignant neoplasm of bladder	neoplasms	-0.03717	0.963508	0.014908	0.012644	logistic	477347	4639	472708	2	0	0	0.405693	1	0.524164	HDL
Pericarditis	circulatory system	-0.04747	0.95364	0.019078	0.0128423	logistic	474105	2777	471328	2	0	0	0.352025	1	0.552969	HDL
Chondrocalcinosis	endocrine/metabolic	-0.0856	0.917961	0.034404	0.0128436	logistic	471842	856	470986	2	0	0	0.339526	1	0.560103	HDL
Fever of unknown origin	symptoms	-0.02813	0.97226	0.01133	0.0130278	logistic	475394	7955	467439	2	0	0	0.085336	1	0.770192	HDL
Phobia	mental disorders	-0.06045	0.94134	0.024428	0.0133371	logistic	437064	1693	435371	2	0.001887	36.0903	1.56471	1	0.210977	HDL
Infection/inflammation of internal prosthetic device; implant; and graft	infectious diseases	-0.03865	0.962089	0.015631	0.0134165	logistic	476805	4146	472659	2	0.00662	81.895	5.52332	1	0.018765	HDL
Aplastic anemia	hematopoietic	-0.07475	0.927978	0.030237	0.0134336	logistic	461800	1101	460699	2	0	0	0.154215	1	0.69454	HDL
Other diseases of lung	respiratory	-0.03562	0.965003	0.014498	0.0140001	logistic	475738	4930	470808	2	0.000362	46.2642	1.86096	1	0.172514	HDL
Retention of urine	genitourinary	-0.01947	0.980719	0.007924	0.0140085	logistic	463123	17086	446037	2	0	0	0.614481	1	0.433106	HDL
Generalized anxiety disorder	mental disorders	-0.04111	0.959728	0.01675	0.0141269	logistic	441160	4571	436589	2	0	0	0.077663	1	0.78049	HDL
Malignant neoplasm, other	neoplasms	-0.0237	0.976582	0.009677	0.0143383	logistic	469720	11143	458577	2	0.001272	58.9242	2.43452	1	0.11869	HDL
Sciatica	symptoms	-0.03374	0.966825	0.013794	0.014454	logistic	465380	5443	459937	2	0.00219	85.0968	6.70998	1	0.009587	HDL
Pruritus and related conditions	dermatologic	-0.05001	0.951216	0.020481	0.0146076	logistic	475967	2438	473529	2	0.000656	43.8625	1.78134	1	0.181985	HDL
Mitral valve stenosis and aortic valve stenosis	circulatory system	-0.0555	0.946012	0.022736	0.0146461	logistic	469963	1958	468005	2	0.003069	49.5244	1.98116	1	0.159269	HDL
Disorders of optic nerve and visual pathways	sense organs	-0.07735	0.925564	0.03171	0.0147117	logistic	453831	1004	452827	2	0	0	0.52192	1	0.470024	HDL
Cerebral aneurysm	circulatory system	-0.08655	0.917087	0.035487	0.0147288	logistic	467296	799	466497	2	0	0	0.912182	1	0.339536	HDL
Personality disorders	mental disorders	-0.05426	0.947186	0.02226	0.0147861	logistic	438680	2279	436401	2	0	0	0.467474	1	0.494151	HDL
Diseases of hair and hair follicles	dermatologic	-0.09164	0.912431	0.037633	0.0148843	logistic	465245	711	464534	2	0	0	0.093331	1	0.759984	HDL
Cyst and pseudocyst of pancreas	digestive	-0.07644	0.926412	0.031465	0.015131	logistic	476865	1020	475845	2	0	0	0.100466	1	0.751272	HDL
Joint effusions	musculoskeletal	-0.04263	0.958263	0.017576	0.0152827	logistic	467345	3287	464058	2	0	0	0.077291	1	0.781003	HDL
Sinoatrial node dysfunction (Bradycardia)	circulatory system	-0.06168	0.940185	0.025442	0.0153366	logistic	450624	1578	449046	2	0	0	0.022452	1	0.88089	HDL
Mineral deficiency NEC	endocrine/metabolic	-0.07858	0.924428	0.032526	0.015694	logistic	461240	951	460289	2	0.006589	62.482	2.66539	1	0.102553	HDL
Pain and other symptoms associated with female genital organs	genitourinary	-0.04891	0.952267	0.020308	0.0160209	logistic	413203	2466	410737	2	0	0	0.33726	1	0.561415	HDL
Diseases of the larynx and vocal cords	respiratory	-0.03789	0.962819	0.015794	0.0164428	logistic	450336	4055	446281	2	0	0	0.636112	1	0.425122	HDL
Viral hepatitis C	infectious diseases	-0.0425	0.95839	0.01773	0.0165296	logistic	465170	3401	461769	2	0	0	0.248115	1	0.618406	HDL
Perforation of tympanic membrane	sense organs	-0.06418	0.937836	0.026828	0.0167429	logistic	469462	1400	468062	2	0	0	0.74484	1	0.388115	HDL
Complication of internal orthopedic device	injuries & poisonings	-0.03906	0.961689	0.016332	0.0167585	logistic	474541	3803	470738	2	0	0	1.75e-07	1	0.999666	HDL
Other disorders of metabolism	endocrine/metabolic	-0.0534	0.947997	0.02235	0.0168719	logistic	474565	2019	472546	2	0.003375	44.2112	1.79247	1	0.180625	HDL
Peritonitis and retroperitoneal infections	digestive	-0.05672	0.944854	0.023772	0.0170216	logistic	471720	1782	469938	2	0	0	0.031419	1	0.859308	HDL
Migrain with aura	neurological	-0.08162	0.921621	0.034578	0.0182526	logistic	463003	855	462148	2	0	0	0.0909	1	0.763037	HDL
Inflammation of eyelids	sense organs	-0.0288	0.97161	0.012209	0.0183298	logistic	462401	7239	455162	2	0.000239	44.2385	1.79335	1	0.180518	HDL
Cerebral atherosclerosis	circulatory system	-0.08713	0.916555	0.037242	0.0193032	logistic	467237	727	466510	2	0	0	0.036339	1	0.848818	HDL
Sleep disorders	neurological	-0.03544	0.965181	0.015166	0.0194529	logistic	448538	4602	443936	2	0	0	0.071502	1	0.789162	HDL
Valvular heart disease/ heart chambers	congenital anomalies	0.092565	1.09698	0.039653	0.019577	logistic	477500	639	476861	2	0.011317	69.8884	3.32098	1	0.068401	HDL
Benign neoplasm of eye, uveal	neoplasms	-0.05134	0.949951	0.022006	0.0196363	logistic	476328	2174	474154	2	0	0	0.109941	1	0.740212	HDL
Synoviopathy	musculoskeletal	-0.06298	0.938967	0.027159	0.0204076	logistic	449781	1375	448406	2	0	0	0.301959	1	0.582657	HDL
Anorexia	endocrine/metabolic	-0.05179	0.949528	0.022514	0.0214276	logistic	461254	1989	459265	2	0	0	0.620924	1	0.430704	HDL
Viral Enteritis	infectious diseases	-0.05983	0.941928	0.026028	0.0215326	logistic	476353	1484	474869	2	0.012646	74.3118	3.89284	1	0.048492	HDL
Other arthropathies	musculoskeletal	-0.06643	0.935726	0.02895	0.0217502	logistic	463976	1210	462766	2	0	0	0.255621	1	0.613145	HDL
Postinflammatory pulmonary fibrosis	respiratory	-0.04361	0.957326	0.019051	0.0220709	logistic	470257	2796	467461	2	0	0	0.023657	1	0.877761	HDL
Neoplasm of uncertain behavior	neoplasms	-0.03833	0.962396	0.016802	0.0225331	logistic	470885	3650	467235	2	0.001806	76.1444	4.1919	1	0.040618	HDL
Other specified erythematous conditions	dermatologic	-0.07868	0.924336	0.034732	0.0234921	logistic	462051	847	461204	2	0	0	0.485752	1	0.485829	HDL
Cancer of other lymphoid, histiocytic tissue	neoplasms	-0.04236	0.958522	0.018731	0.0237205	logistic	476102	2883	473219	2	0.001209	26.0154	1.35163	1	0.244993	HDL
Insomnia	neurological	-0.02664	0.973714	0.011795	0.0239264	logistic	454461	9042	445419	2	0.00255	65.5065	2.8991	1	0.088629	HDL
Disorders of iris and ciliary body	sense organs	-0.07522	0.927535	0.033369	0.0241759	logistic	453788	908	452880	2	0.003846	59.6275	2.47693	1	0.115527	HDL
Gastric ulcer	digestive	-0.02762	0.972754	0.012305	0.0247683	logistic	475655	6738	468917	2	0.000328	18.5324	1.22748	1	0.267897	HDL
Contusion	injuries & poisonings	-0.03233	0.968189	0.014454	0.0253121	logistic	473020	4923	468097	2	0	0	0.591001	1	0.442032	HDL
Gingival and periodontal diseases	digestive	-0.02484	0.975465	0.011161	0.0260371	logistic	465259	8941	456318	2	0	0	0.176815	1	0.674125	HDL
Fracture of pelvis	injuries & poisonings	0.057621	1.05931	0.026084	0.0271721	logistic	468408	1481	466927	2	0	0	0.231556	1	0.630373	HDL
Primary pulmonary hypertension	circulatory system	-0.07905	0.923991	0.03583	0.0273604	logistic	472979	786	472193	2	0.008908	72.0665	3.57993	1	0.058482	HDL
Nephritis and nephropathy with pathological lesion	genitourinary	-0.08517	0.918352	0.038608	0.0273758	logistic	462869	676	462193	2	0	0	0.189417	1	0.663403	HDL
Pancreatic cancer	neoplasms	-0.05775	0.943884	0.026189	0.0274417	logistic	472778	1469	471309	2	0.009469	68.135	3.13824	1	0.076476	HDL
Acute pharyngitis	respiratory	-0.04061	0.960203	0.0185	0.028155	logistic	457059	3055	454004	2	0	0	0.831062	1	0.361966	HDL
Duodenal ulcer	digestive	-0.03422	0.96636	0.015589	0.0281613	logistic	475481	4172	471309	2	0	0	0.577184	1	0.447418	HDL
Streptococcus infection	infectious diseases	-0.03895	0.961803	0.017751	0.0282329	logistic	471378	3207	468171	2	0	0	0.140933	1	0.707355	HDL
Graves' disease	endocrine/metabolic	-0.0721	0.930435	0.033049	0.0291343	logistic	466574	923	465651	2	0	0	0.974558	1	0.323546	HDL
Balanoposthitis	genitourinary	-0.08493	0.918581	0.039066	0.0297143	logistic	445380	664	444716	2	0	0	0.138689	1	0.709588	HDL
Periapical abscess	digestive	-0.04664	0.954433	0.021494	0.0300201	logistic	459159	2189	456970	2	0	0	0.130049	1	0.718382	HDL
Traumatic amputation	injuries & poisonings	-0.07023	0.932183	0.032498	0.0306989	logistic	469080	959	468121	2	0.002226	51.027	2.04194	1	0.153014	HDL
Cancer, suspected or other	neoplasms	-0.02088	0.979335	0.009759	0.0323715	logistic	469465	10959	458506	2	0	0	0.017039	1	0.896143	HDL
Hepatitis NOS	infectious diseases	-0.07977	0.923327	0.037309	0.0325066	logistic	462400	726	461674	2	0	0	0.327338	1	0.567231	HDL
Pathologic fracture of vertebrae	musculoskeletal	0.066936	1.06923	0.031344	0.0327203	logistic	472010	1026	470984	2	0	0	0.050968	1	0.821388	HDL
Abnormal findings examination of lungs	respiratory	-0.02396	0.976327	0.01126	0.0333715	logistic	472832	8216	464616	2	0	0	0.096498	1	0.756073	HDL
Calculus of bile duct	digestive	-0.07483	0.9279	0.035208	0.0335508	logistic	474050	815	473235	2	0	0	0.631484	1	0.426811	HDL
Other disorders of bone and cartilage	musculoskeletal	-0.0419	0.958964	0.019741	0.0337926	logistic	459976	2594	457382	2	0.002327	54.7024	2.20763	1	0.13733	HDL
Optic atrophy	sense organs	-0.08714	0.916549	0.041371	0.0351762	logistic	453975	598	453377	2	0	0	0.352681	1	0.552599	HDL
Tension headache	mental disorders	-0.07638	0.926466	0.036289	0.035316	logistic	437121	775	436346	2	0.007188	68.9386	3.21942	1	0.072769	HDL
Colon cancer	neoplasms	-0.02684	0.973518	0.012812	0.0361903	logistic	456160	6250	449910	2	0	0	0.055148	1	0.814336	HDL
Other disorders of bladder	genitourinary	-0.01755	0.982601	0.00838	0.0362062	logistic	472324	14968	457356	2	0.000567	43.6864	1.77577	1	0.18267	HDL
Generalized convulsive epilepsy	neurological	-0.07403	0.928643	0.035474	0.0368976	logistic	464853	798	464055	2	0	0	0.739016	1	0.389976	HDL
Allergic rhinitis	respiratory	-0.01968	0.980516	0.009486	0.0380435	logistic	460852	13649	447203	2	0.000245	49.6623	1.98658	1	0.158699	HDL
Disorders of calcium/phosphorus metabolism	endocrine/metabolic	-0.03679	0.963883	0.017795	0.0387202	logistic	473881	3196	470685	2	0	0	0.106138	1	0.744584	HDL
Other alveolar and parietoalveolar pneumonopathy	respiratory	-0.06404	0.937966	0.031032	0.0390442	logistic	469915	1047	468868	2	0.007176	71.3766	3.49365	1	0.061605	HDL
Ectropion or entropion	sense organs	-0.03999	0.960804	0.019445	0.0397545	logistic	458929	2710	456219	2	0	0	0.004103	1	0.948929	HDL
Dysuria	genitourinary	-0.04131	0.959528	0.020186	0.0406921	logistic	461516	2492	459024	2	0	0	0.038567	1	0.844308	HDL
Bursitis	musculoskeletal	-0.04172	0.95914	0.020402	0.0408683	logistic	450823	2489	448334	2	0	0	0.221619	1	0.637809	HDL
Glucocorticoid deficiency	endocrine/metabolic	-0.08726	0.916438	0.042732	0.0411487	logistic	469884	551	469333	2	0	0	0.031123	1	0.859967	HDL
Extrapyramidal disease and abnormal movement disorders	neurological	-0.04137	0.959477	0.020289	0.0414601	logistic	465472	2461	463011	2	0	0	0.297659	1	0.585354	HDL
Nonspecific abnormal findings in stool contents	digestive	-0.02969	0.970748	0.014628	0.0424028	logistic	465911	4748	461163	2	0	0	0.601826	1	0.437882	HDL
Calcaneal spur; Exostosis NOS	musculoskeletal	-0.04115	0.959684	0.020306	0.0427052	logistic	450678	2500	448178	2	4.47e-05	5.07688	1.05348	1	0.304706	HDL
Schizophrenia	mental disorders	0.046317	1.04741	0.023149	0.0454163	logistic	438087	1986	436101	2	0	0	0.30631	1	0.579954	HDL
Other hypertrophic and atrophic conditions of skin	dermatologic	-0.02138	0.978846	0.010742	0.0465552	logistic	465629	8901	456728	2	0.00314	89.0286	9.11462	1	0.002536	HDL
Eosinophill_percentage	Biomarkers & Measurements	0.005795	NA	0.002919	0.0471355	linear	413852	NA	NA	2	0.127225	88.4174	8.63362	1	0.0033	HDL
Open wound of foot except toe(s) alone	injuries & poisonings	-0.08846	0.915344	0.044655	0.0476092	logistic	468907	508	468399	2	0.001221	23.4301	1.306	1	0.253121	HDL
Systemic lupus erythematosus	dermatologic	-0.07988	0.923227	0.041022	0.0515007	logistic	461337	597	460740	2	0.002346	28.5552	1.39968	1	0.236777	HDL
Adjustment reaction	mental disorders	-0.02446	0.975838	0.012639	0.05296	logistic	445745	9238	436507	2	0	0	0.168724	1	0.681248	HDL
Ovarian cyst	genitourinary	-0.0259	0.974432	0.01344	0.0539692	logistic	411361	5724	405637	2	0	0	0.548119	1	0.459087	HDL
Neuralgia, neuritis, and radiculitis NOS	symptoms	-0.04132	0.959523	0.021553	0.0552294	logistic	464279	2217	462062	2	0	0	0.840264	1	0.359321	HDL
Hydronephrosis	genitourinary	-0.03873	0.962012	0.020378	0.0573633	logistic	471910	2438	469472	2	0	0	0.274823	1	0.600115	HDL
Endometriosis	genitourinary	-0.02875	0.971663	0.015152	0.0577995	logistic	412944	4487	408457	2	0	0	0.083712	1	0.772328	HDL
Contracture of palmar fascia [Dupuytren's disease]	musculoskeletal	0.026962	1.02733	0.014358	0.0603964	logistic	450045	4952	445093	2	0.003969	83.6658	6.12214	1	0.01335	HDL
Epilepsy	neurological	-0.04867	0.952498	0.025998	0.0612078	logistic	465350	1493	463857	2	0	0	0.843006	1	0.358539	HDL
Secondary malignant neoplasm	neoplasms	-0.01431	0.985793	0.007674	0.0622523	logistic	469376	17937	451439	2	0	0	0.028153	1	0.86675	HDL
Irritable Bowel Syndrome	digestive	-0.01744	0.982707	0.009421	0.0640792	logistic	457368	11680	445688	2	0	0	0.982628	1	0.321551	HDL
Cervical intraepithelial neoplasia [CIN] [Cervical dysplasia]	neoplasms	-0.03935	0.961413	0.021298	0.0646545	logistic	412858	2241	410617	2	0.004708	62.1627	2.6429	1	0.104014	HDL
Subjective visual disturbances	sense organs	-0.04062	0.960191	0.022031	0.0651936	logistic	465632	2089	463543	2	0.000542	34.9396	1.53703	1	0.21506	HDL
Disorders of adrenal glands	endocrine/metabolic	-0.05073	0.950537	0.027519	0.0652715	logistic	470084	1333	468751	2	0	0	0.354981	1	0.551307	HDL
Bladder neck obstruction	genitourinary	-0.03295	0.967586	0.017938	0.0662289	logistic	472205	3177	469028	2	0	0	0.042245	1	0.837154	HDL
Vaginitis and vulvovaginitis	genitourinary	-0.05233	0.949012	0.028523	0.0665308	logistic	413216	1277	411939	2	0.002297	55.0972	2.22703	1	0.135614	HDL
Heartburn	digestive	-0.03069	0.969771	0.016849	0.0684885	logistic	446257	3564	442693	2	0.001369	50.0012	2.00005	1	0.157294	HDL
Herpes zoster	infectious diseases	-0.04153	0.95932	0.022949	0.0703398	logistic	463221	1951	461270	2	0	0	0.064998	1	0.798764	HDL
Hemorrhage of gastrointestinal tract	digestive	-0.01656	0.983573	0.009178	0.0711143	logistic	466279	12242	454037	2	0.000277	36.3221	1.5704	1	0.210148	HDL
Kidney replaced by transpant	genitourinary	-0.07161	0.930894	0.039734	0.0715123	logistic	462782	637	462145	2	0	0	0.613623	1	0.433427	HDL
Fracture of ankle and foot	injuries & poisonings	-0.03356	0.966993	0.018637	0.0717153	logistic	469211	2922	466289	2	0	0	0.530949	1	0.466208	HDL
Dermatophytosis	infectious diseases	-0.04558	0.955446	0.02536	0.0723084	logistic	459006	1615	457391	2	0	0	0.068066	1	0.794173	HDL
Premature beats	circulatory system	-0.04015	0.960643	0.022645	0.0762097	logistic	450679	1980	448699	2	0	0	0.644555	1	0.422066	HDL
Disorder of skin and subcutaneous tissue NOS	dermatologic	-0.01503	0.98508	0.008481	0.0763258	logistic	470564	14685	455879	2	0	0	0.018677	1	0.891298	HDL
Other specified diseases of hair and hair follicles	dermatologic	-0.05219	0.949145	0.029563	0.07748	logistic	466209	1182	465027	2	0	0	0.437226	1	0.508464	HDL
Disorders of magnesium metabolism	endocrine/metabolic	-0.03416	0.966417	0.019375	0.0778864	logistic	474451	2699	471752	2	0	0	0.006878	1	0.933906	HDL
Abnormal serum enzyme levels	digestive	-0.05552	0.945997	0.031683	0.0797352	logistic	466078	1014	465064	2	0	0	0.001518	1	0.968918	HDL
Pathological, developmental or recurrent dislocation	musculoskeletal	-0.0646	0.937443	0.036886	0.0798883	logistic	466604	738	465866	2	0	0	0.021726	1	0.882819	HDL
Disorders of penis	genitourinary	-0.03513	0.965478	0.020183	0.081742	logistic	438559	2490	436069	2	0.000318	13.4001	1.15474	1	0.28256	HDL
Complex regional/central pain syndrome	neurological	-0.06922	0.933123	0.039864	0.0825049	logistic	458887	637	458250	2	0	0	0.01702	1	0.896201	HDL
Paralytic ileus	digestive	-0.04571	0.955322	0.026493	0.0844851	logistic	455780	1436	454344	2	0.003443	52.7126	2.11473	1	0.145888	HDL
Hyperparathyroidism	endocrine/metabolic	-0.03776	0.962945	0.021943	0.0852878	logistic	470278	2107	468171	2	0.00013	9.14406	1.10064	1	0.294125	HDL
Other acquired musculoskeletal deformity	musculoskeletal	-0.02895	0.971464	0.016901	0.0867165	logistic	462581	3544	459037	2	0.000843	39.171	1.64395	1	0.199784	HDL
Secondary malignant neoplasm of liver	neoplasms	-0.02223	0.978012	0.013171	0.0913973	logistic	469287	5876	463411	2	0	0	0.000664	1	0.979441	HDL
Fracture of clavicle or scapula	injuries & poisonings	0.038556	1.03931	0.022932	0.0927019	logistic	468607	1913	466694	2	0	0	0.002368	1	0.961191	HDL
Other and unspecified disc disorder	musculoskeletal	-0.03338	0.967167	0.01989	0.0932606	logistic	457371	2586	454785	2	0	0	0.090468	1	0.763583	HDL
Cholesteatoma	sense organs	-0.05713	0.944468	0.034057	0.0934347	logistic	469323	868	468455	2	0.002047	35.5854	1.55244	1	0.212775	HDL
Protein-calorie malnutrition	endocrine/metabolic	-0.04953	0.951674	0.029763	0.096072	logistic	461724	1149	460575	2	0	0	0.464689	1	0.495441	HDL
Stricture and stenosis of esophagus	digestive	-0.0269	0.973461	0.016177	0.0963731	logistic	446380	3874	442506	2	0.004016	78.6642	4.68696	1	0.030392	HDL
Conductive hearing loss	sense organs	-0.04694	0.954149	0.028375	0.0981097	logistic	441984	1265	440719	2	0	0	0.34199	1	0.558683	HDL
Other and unspecified disorders of the nervous system	neurological	-0.06031	0.94147	0.03668	0.100111	logistic	465025	751	464274	2	0	0	0.123828	1	0.724919	HDL
Open-angle glaucoma	sense organs	0.019624	1.01982	0.011982	0.10145	logistic	458604	7822	450782	2	0.00077	71.2607	3.47955	1	0.062132	HDL
Degenerative and vascular disorders of ear	sense organs	-0.06827	0.934012	0.041915	0.10338	logistic	441560	577	440983	2	0.010045	73.0335	3.70831	1	0.054142	HDL
Tobacco use disorder	mental disorders	-0.04927	0.951926	0.030483	0.106043	logistic	465685	33030	432655	2	0.001776	95.5694	22.5705	1	2.03e-06	HDL
Gram positive septicemia	infectious diseases	-0.04889	0.952283	0.030334	0.107007	logistic	471280	1094	470186	2	0	0	0.12616	1	0.722447	HDL
Sensorineural hearing loss	sense organs	-0.01434	0.985761	0.0089	0.10707	logistic	464916	24899	440017	2	0	0	0.521916	1	0.470026	HDL
Frequency of urination and polyuria	genitourinary	-0.0182	0.981966	0.011293	0.107074	logistic	463950	8265	455685	2	0	0	0.268262	1	0.6045	HDL
Dysmenorrhea	genitourinary	-0.03847	0.962263	0.023932	0.107981	logistic	411386	1807	409579	2	0	0	0.885061	1	0.346819	HDL
Degenerative disease of the spinal cord	neurological	-0.02916	0.971262	0.018216	0.109449	logistic	464885	3043	461842	2	0	0	0.170836	1	0.67937	HDL
Dislocation	injuries & poisonings	-0.03222	0.968289	0.020147	0.109709	logistic	471880	2545	469335	2	0	0	0.00687	1	0.933942	HDL
Non-Hodgkins lymphoma	neoplasms	-0.02786	0.97252	0.017438	0.110054	logistic	476563	3341	473222	2	0.005061	83.1501	5.93474	1	0.014845	HDL
Calculus of kidney	genitourinary	-0.01724	0.982907	0.010831	0.111411	logistic	475173	8884	466289	2	0.000303	55.8242	2.26368	1	0.132439	HDL
Althete's foot	infectious diseases	-0.03421	0.966372	0.021493	0.111497	logistic	459961	2331	457630	2	9.94e-05	3.75009	1.03896	1	0.308063	HDL
Other mental disorder	mental disorders	-0.02501	0.975296	0.015753	0.112311	logistic	441157	4863	436294	2	0.003224	76.592	4.27205	1	0.038744	HDL
Benign neoplasm of lip, oral cavity, and pharynx	neoplasms	-0.03997	0.960817	0.025189	0.112547	logistic	476915	1588	475327	2	0	0	0.597514	1	0.439528	HDL
Disorders of the pituitary gland and its hypothalamic control	endocrine/metabolic	-0.04378	0.957168	0.027678	0.113726	logistic	469855	1314	468541	2	0	0	0.053895	1	0.816419	HDL
Symptomatic menopause	genitourinary	-0.05607	0.945472	0.035764	0.116928	logistic	411997	1067	410930	2	0	0	0.387552	1	0.533589	HDL
Aspartate_aminotransferase	Biomarkers & Measurements	-0.5292	NA	0.339073	0.118588	linear	407225	NA	NA	2	0.221132	96.0264	25.166	1	5.26e-07	HDL
Atopic/contact dermatitis due to other or unspecified	dermatologic	-0.01489	0.985215	0.009579	0.119942	logistic	464990	12079	452911	2	0	0	0.027787	1	0.86761	HDL
Chronic dermatitis due to solar radiation	dermatologic	-0.04996	0.951267	0.032308	0.122008	logistic	458050	976	457074	2	0.004298	66.9873	3.02914	1	0.081782	HDL
Endocarditis	circulatory system	-0.04164	0.959215	0.027052	0.12374	logistic	474159	1382	472777	2	0.008183	80.3553	5.09043	1	0.024058	HDL
Arrhythmia (cardiac) NOS	circulatory system	-0.02188	0.978356	0.014217	0.123768	logistic	453528	5342	448186	2	0.000526	54.8872	2.21667	1	0.136528	HDL
Bronchiectasis	respiratory	-0.02308	0.977183	0.015039	0.124834	logistic	455310	4502	450808	2	0	0	0.367024	1	0.544631	HDL
Nephrotic syndrome without mention of glomerulonephritis	genitourinary	-0.04449	0.956485	0.029111	0.126431	logistic	462759	1186	461573	2	0.001801	26.5002	1.36055	1	0.243443	HDL
Chronic hepatitis	infectious diseases	-0.05855	0.94313	0.038375	0.127071	logistic	462348	686	461662	2	0.033983	91.7186	12.0752	1	0.000511	HDL
Raynaud's syndrome	circulatory system	-0.02981	0.970628	0.019579	0.127837	logistic	465198	2635	462563	2	0.001437	41.0128	1.69528	1	0.192906	HDL
Other disorders of thyroid	endocrine/metabolic	-0.04634	0.954718	0.030464	0.128234	logistic	466726	1089	465637	2	0	0	0.412833	1	0.520535	HDL
Adverse drug events and drug allergies	injuries & poisonings	-0.04539	0.955624	0.030119	0.131795	logistic	472084	1121	470963	2	0	0	0.11197	1	0.737913	HDL
Painful respiration	respiratory	-0.044	0.956952	0.029361	0.13396	logistic	448347	1191	447156	2	0	0	0.069631	1	0.791874	HDL
Lymphoid leukemia, chronic	neoplasms	0.042687	1.04361	0.028489	0.134046	logistic	476289	1251	475038	2	0	0	0.105759	1	0.745025	HDL
Seborrheic keratosis	dermatologic	-0.01366	0.986434	0.009266	0.140463	logistic	464492	13886	450606	2	0	0	0.365532	1	0.54545	HDL
Sebaceous cyst	dermatologic	-0.01272	0.987365	0.008648	0.141483	logistic	467249	13942	453307	2	0	0	0.023448	1	0.878297	HDL
Incisional hernia	digestive	-0.03628	0.964366	0.024821	0.14378	logistic	466135	1646	464489	2	0	0	0.282822	1	0.594858	HDL
Strabismus (not specified as paralytic)	sense organs	-0.03193	0.968577	0.021872	0.144374	logistic	454691	2151	452540	2	0	0	0.000304	1	0.9861	HDL
Radiotherapy	neoplasms	-0.02468	0.975626	0.017129	0.149702	logistic	469724	3463	466261	2	0	0	0.65478	1	0.418409	HDL
Iron deficiency anemia secondary to blood loss (chronic)	hematopoietic	-0.04365	0.957285	0.030431	0.151425	logistic	462029	1092	460937	2	0	0	0.069341	1	0.792298	HDL
Jaundice (not of newborn)	digestive	-0.03521	0.965402	0.024692	0.153873	logistic	465699	1653	464046	2	0.008291	74.7365	3.95827	1	0.046642	HDL
Pathologic fracture	musculoskeletal	0.036737	1.03742	0.025828	0.154926	logistic	471994	1510	470484	2	0.003947	45.402	1.83157	1	0.175942	HDL
Memory loss	mental disorders	-0.02557	0.974758	0.017982	0.155106	logistic	467263	3194	464069	2	0	0	0.659727	1	0.416656	HDL
Disturbance of salivary secretion	digestive	0.05582	1.05741	0.03949	0.157509	logistic	472968	651	472317	2	0	0	0.197457	1	0.656781	HDL
Ileostomy status	digestive	-0.02685	0.973505	0.019026	0.158155	logistic	455831	2789	453042	2	0	0	0.009843	1	0.920969	HDL
Disorders of uterus, NEC	genitourinary	-0.02161	0.978622	0.015316	0.158279	logistic	413458	4362	409096	2	0.001657	44.0842	1.7884	1	0.181121	HDL
Cancer of larynx	neoplasms	0.055327	1.05689	0.039234	0.158487	logistic	476867	656	476211	2	0	0	0.637606	1	0.424579	HDL
Stricture/obstruction of ureter	genitourinary	-0.0328	0.967732	0.023369	0.16044	logistic	462864	1846	461018	2	0	0	0.341531	1	0.558947	HDL
Peyronie's disease	genitourinary	-0.03872	0.962021	0.027611	0.160825	logistic	438597	1327	437270	2	0.00749	78.0538	4.55661	1	0.032792	HDL
Lipoma	neoplasms	-0.01508	0.985037	0.010763	0.161283	logistic	474699	8831	465868	2	0	0	0.003785	1	0.950943	HDL
Fracture of neck of femur	injuries & poisonings	-0.02166	0.978572	0.015566	0.164072	logistic	468653	4208	464445	2	0.003716	70.6303	3.40487	1	0.065004	HDL
Dental caries	digestive	-0.0126	0.98748	0.009059	0.164316	logistic	468436	14022	454414	2	0	0	0.087976	1	0.766767	HDL
Diseases of pulp and periapical tissues	digestive	-0.02594	0.974395	0.018682	0.165008	logistic	459143	2899	456244	2	0	0	0.035266	1	0.851039	HDL
Hematemesis	digestive	-0.025	0.975307	0.018035	0.165627	logistic	465266	3103	462163	2	0	0	0.012738	1	0.910141	HDL
Secondary malignancy of lymph nodes	neoplasms	-0.0138	0.986296	0.010039	0.169311	logistic	469742	10207	459535	2	0	0	0.280762	1	0.596202	HDL
Respiratory abnormalities	respiratory	-0.03651	0.964152	0.026686	0.171319	logistic	475929	1417	474512	2	0	0	0.000946	1	0.975463	HDL
Acne	dermatologic	0.045965	1.04704	0.033695	0.172529	logistic	464234	924	463310	2	0	0	0.473155	1	0.491539	HDL
Gastritis and duodenitis, NOS	digestive	-0.03221	0.968301	0.023699	0.174068	logistic	469408	1810	467598	2	0	0	0.075401	1	0.78363	HDL
Heart valve replaced	circulatory system	-0.0222	0.97804	0.016389	0.175449	logistic	470726	3808	466918	2	0	0	0.179286	1	0.671988	HDL
Nonrheumatic mitral valve disorders	circulatory system	-0.01731	0.982838	0.012811	0.176607	logistic	470968	6248	464720	2	0	0	0.195723	1	0.658195	HDL
Trigeminal nerve disorders [CN5]	neurological	-0.04073	0.96009	0.030191	0.177328	logistic	458902	1107	457795	2	1.06e-05	0.439554	1.00442	1	0.316245	HDL
Antisocial/borderline personality disorder	mental disorders	-0.04347	0.957457	0.03225	0.177647	logistic	437816	1127	436689	2	0	0	0.612546	1	0.433831	HDL
Urinary obstruction	genitourinary	-0.05975	0.941996	0.044785	0.182124	logistic	460923	505	460418	2	0	0	0.463053	1	0.496201	HDL
Paroxysmal supraventricular tachycardia	circulatory system	-0.02003	0.980165	0.015082	0.184056	logistic	450653	4462	446191	2	0	0	0.440396	1	0.506931	HDL
Complication due to other implant and internal device	injuries & poisonings	-0.054	0.947432	0.040816	0.185835	logistic	474112	604	473508	2	0	0	0.216343	1	0.641841	HDL
Lump or mass in breast	genitourinary	0.027083	1.02745	0.020478	0.185985	logistic	475898	2436	473462	2	0.002495	68.2664	3.15123	1	0.07587	HDL
Acquired spondylolisthesis	musculoskeletal	-0.02432	0.975975	0.018398	0.186235	logistic	462524	2990	459534	2	0	0	0.014194	1	0.905166	HDL
Barrett's esophagus	digestive	-0.01555	0.984571	0.011788	0.187152	logistic	447583	7418	440165	2	0	0	0.522761	1	0.469666	HDL
Other immunological findings	endocrine/metabolic	-0.0579	0.943744	0.044097	0.189182	logistic	477990	518	477472	2	0	0	0.002215	1	0.962465	HDL
Kyphoscoliosis and scoliosis	musculoskeletal	-0.03215	0.968362	0.024489	0.189255	logistic	462531	1686	460845	2	0	0	0.00419	1	0.948387	HDL
Nerve root and plexus disorders	neurological	-0.03911	0.961647	0.029808	0.189521	logistic	458796	1132	457664	2	0	0	0.712679	1	0.398556	HDL
Fracture of unspecified part of femur	injuries & poisonings	-0.05173	0.949584	0.039483	0.190123	logistic	468438	646	467792	2	0	0	0.485314	1	0.486025	HDL
Peptic ulcer, site unspecified	digestive	-0.03165	0.968844	0.024179	0.190518	logistic	476452	1754	474698	2	0.000253	16.2292	1.19373	1	0.274578	HDL
Prostatitis	genitourinary	0.024419	1.02472	0.01874	0.192564	logistic	445777	2905	442872	2	0.000192	15.346	1.18128	1	0.277096	HDL
Prurigo and Lichen	dermatologic	-0.0286	0.971803	0.022176	0.197128	logistic	462379	2073	460306	2	0	0	0.075637	1	0.783299	HDL
Disorders of conjunctiva	sense organs	-0.02984	0.970601	0.023166	0.197716	logistic	459315	1915	457400	2	0	0	0.097506	1	0.754844	HDL
Postmenopausal atrophic vaginitis	genitourinary	0.029705	1.03015	0.023249	0.201361	logistic	411376	1913	409463	2	0.007523	73.02	3.70645	1	0.054203	HDL
Chronic pulmonary heart disease	circulatory system	-0.02512	0.975189	0.019689	0.201941	logistic	473424	2618	470806	2	0	0	0.071243	1	0.789536	HDL
Thoracic or lumbosacral neuritis or radiculitis, unspecified	symptoms	-0.01791	0.982252	0.014035	0.201984	logistic	467453	5520	461933	2	5.13e-05	6.98755	1.07513	1	0.299791	HDL
Ulcer of esophagus	digestive	-0.01542	0.984696	0.012144	0.204092	logistic	446146	6932	439214	2	0.002029	54.235	2.18507	1	0.139354	HDL
Musculoskeletal symptoms referable to limbs	symptoms	-0.03609	0.964553	0.028495	0.205311	logistic	472387	1240	471147	2	0.019094	79.3331	4.83866	1	0.027828	HDL
Basophill_count	Biomarkers & Measurements	0.000104	NA	8.19e-05	0.205794	linear	404422	NA	NA	2	0.089073	86.728	7.53468	1	0.006052	HDL
Bursitis disorders	musculoskeletal	-0.04168	0.959174	0.033095	0.207853	logistic	450018	935	449083	2	0	0	0.14298	1	0.705336	HDL
Pneumonitis due to inhalation of food or vomitus	respiratory	-0.02552	0.974799	0.020568	0.214625	logistic	469879	2392	467487	2	0.000578	16.3772	1.19585	1	0.274153	HDL
Renal colic	genitourinary	-0.02609	0.974251	0.021144	0.2173	logistic	471390	2253	469137	2	3.18e-05	0.802376	1.00809	1	0.315361	HDL
Retinal vascular changes and abnomalities	sense organs	-0.03149	0.969002	0.025523	0.217301	logistic	453355	1615	451740	2	1.81e-05	0.945592	1.00955	1	0.315012	HDL
Cancer of brain	neoplasms	-0.03991	0.960879	0.03237	0.217639	logistic	474429	959	473470	2	0	0	0.395052	1	0.529656	HDL
Thyroid cancer	neoplasms	-0.04268	0.958222	0.034954	0.222129	logistic	477326	825	476501	2	0.000145	5.164	1.05445	1	0.304484	HDL
Cancer of esophagus	neoplasms	-0.03052	0.96994	0.025036	0.222812	logistic	472864	1611	471253	2	0	0	0.000915	1	0.97587	HDL
Seborrheic dermatitis	dermatologic	-0.01364	0.986455	0.011205	0.223588	logistic	464776	8335	456441	2	0	0	0.746064	1	0.387725	HDL
Strabismus and other disorders of binocular eye movements	sense organs	-0.02384	0.976445	0.019695	0.226168	logistic	453916	2615	451301	2	0.001401	48.1277	1.92781	1	0.164998	HDL
Varicose veins of lower extremity	circulatory system	0.010109	1.01016	0.008424	0.230171	logistic	453810	14651	439159	2	0	0	0.023749	1	0.877525	HDL
Cancer of oropharynx	neoplasms	-0.04778	0.953347	0.039862	0.230707	logistic	476831	634	476197	2	0	0	0.235543	1	0.627444	HDL
Essential tremor	neurological	-0.0259	0.974428	0.021723	0.233063	logistic	466123	2185	463938	2	0	0	0.251762	1	0.615837	HDL
Other venous embolism and thrombosis	circulatory system	-0.02286	0.9774	0.019362	0.237745	logistic	455169	2843	452326	2	0.002712	67.0195	3.0321	1	0.081632	HDL
Diseases of the oral soft tissues, excluding lesions specific for gingiva and tongue	digestive	-0.02087	0.979344	0.017826	0.241623	logistic	472855	3177	469678	2	0	0	0.028083	1	0.866913	HDL
Acquired toe deformities	musculoskeletal	-0.01322	0.98687	0.011341	0.243821	logistic	463237	7999	455238	2	0.003503	86.511	7.41345	1	0.006474	HDL
Fracture of hand or wrist	injuries & poisonings	0.018993	1.01917	0.016403	0.246914	logistic	469408	3779	465629	2	0	0	0.016338	1	0.898293	HDL
Epiphora	sense organs	-0.02977	0.970669	0.02584	0.249284	logistic	453692	1513	452179	2	0	0	0.255311	1	0.61336	HDL
Cervical radiculitis	symptoms	-0.02315	0.977112	0.020101	0.249372	logistic	465159	2610	462549	2	0.001287	38.5157	1.62643	1	0.202197	HDL
Ganglion and cyst of synovium, tendon, and bursa	musculoskeletal	-0.01657	0.983565	0.014502	0.253158	logistic	450187	4830	445357	2	0	0	0.093921	1	0.759251	HDL
Ulcerative colitis	digestive	-0.01669	0.983445	0.014619	0.253481	logistic	456198	4747	451451	2	0	0	0.05486	1	0.814813	HDL
Chronic sinusitis	respiratory	-0.0131	0.986987	0.011534	0.2561	logistic	454525	8098	446427	2	0	0	0.054057	1	0.816148	HDL
Atrial flutter	circulatory system	-0.02235	0.977901	0.019711	0.256904	logistic	451583	2694	448889	2	0.002509	76.1332	4.18992	1	0.040665	HDL
Diseases of hard tissues of teeth	digestive	-0.01468	0.98543	0.013049	0.260684	logistic	460335	6016	454319	2	0	0	0.499602	1	0.479675	HDL
Rash and other nonspecific skin eruption	dermatologic	-0.0129	0.987187	0.011526	0.263217	logistic	461969	8070	453899	2	0	0	0.044665	1	0.832622	HDL
LDL_cholesterol	Biomarkers & Measurements	-0.33165	NA	0.300252	0.269342	linear	408383	NA	NA	2	0.177206	98.2527	57.2304	1	3.88e-14	HDL
Other upper respiratory disease	respiratory	-0.01927	0.98091	0.017487	0.270368	logistic	451579	3368	448211	2	0	0	0.761346	1	0.382908	HDL
Cellulitis and abscess of face/neck	dermatologic	-0.04509	0.955907	0.041088	0.27242	logistic	462070	600	461470	2	0.000978	21.9324	1.28094	1	0.257724	HDL
Disorders of vitreous body	sense organs	-0.01502	0.98509	0.013723	0.273669	logistic	457983	5982	452001	2	0	0	0.379013	1	0.538132	HDL
Fracture of lower limb	injuries & poisonings	-0.01323	0.98686	0.012129	0.275465	logistic	468790	6954	461836	2	0	0	0.050944	1	0.821429	HDL
Corneal opacity	sense organs	-0.03318	0.967364	0.030655	0.279084	logistic	454247	1094	453153	2	0	0	0.748341	1	0.387002	HDL
Benign neoplasm of respiratory and intrathoracic organs	neoplasms	0.043849	1.04482	0.040529	0.27929	logistic	478371	612	477759	2	0	0	0.254647	1	0.613822	HDL
Primary hypercoagulable state	hematopoietic	-0.04445	0.956525	0.041084	0.279298	logistic	465741	597	465144	2	0.006774	66.509	2.98588	1	0.083994	HDL
Viral warts & HPV	infectious diseases	-0.01679	0.98335	0.015534	0.279771	logistic	464779	4325	460454	2	0.00401	88.7568	8.89428	1	0.002861	HDL
Paralysis/spasm of vocal cords or larynx	respiratory	-0.04389	0.957061	0.04087	0.282892	logistic	449979	602	449377	2	0.006289	53.945	2.17132	1	0.140606	HDL
Creatinine	Biomarkers & Measurements	-0.65167	NA	0.610071	0.285435	linear	409160	NA	NA	2	0.719455	96.5425	28.9225	1	7.53e-08	HDL
Polycythemia, secondary	hematopoietic	-0.03253	0.967994	0.030692	0.289209	logistic	468629	1075	467554	2	0	0	0.006555	1	0.935471	HDL
Fasciitis	musculoskeletal	0.01165	1.01172	0.011038	0.291236	logistic	453399	8727	444672	2	0.002102	89.5254	9.54694	1	0.002003	HDL
Hemangioma and lymphangioma, any site	neoplasms	-0.02058	0.97963	0.019642	0.294747	logistic	476150	2617	473533	2	0	0	0.000958	1	0.975312	HDL
Meniere's disease	sense organs	-0.02932	0.971104	0.028233	0.298997	logistic	464560	1263	463297	2	0	0	0.854033	1	0.355414	HDL
Open wounds of head; neck; and trunk	injuries & poisonings	-0.0245	0.9758	0.023625	0.299772	logistic	469333	1814	467519	2	0.000516	30.1869	1.4324	1	0.231374	HDL
Otalgia	sense organs	-0.02966	0.970773	0.028795	0.302948	logistic	469954	1233	468721	2	0.002424	57.2923	2.3415	1	0.125968	HDL
Neutrophill_percentage	Biomarkers & Measurements	0.01356	NA	0.013298	0.307882	linear	411278	NA	NA	2	0.06252	78.7176	4.69871	1	0.030185	HDL
Symptoms involving respiratory system and other chest symptoms	respiratory	-0.03068	0.969781	0.030286	0.310981	logistic	474445	1108	473337	2	0	0	0.000749	1	0.978171	HDL
Malignant neoplasm of testis	neoplasms	-0.01091	0.989152	0.010843	0.31445	logistic	466010	8829	457181	2	0.002528	41.9112	1.7215	1	0.1895	HDL
Rupture of synovium	musculoskeletal	-0.03204	0.968469	0.032012	0.316897	logistic	449489	984	448505	2	0.001788	38.6439	1.62983	1	0.201726	HDL
Chemotherapy	neoplasms	-0.00872	0.991323	0.008771	0.320393	logistic	470519	13486	457033	2	0	0	0.83722	1	0.360193	HDL
Urea	Biomarkers & Measurements	-0.60748	NA	0.613875	0.322381	linear	409045	NA	NA	2	0.730419	96.8146	31.3936	1	2.11e-08	HDL
Breast cancer [female]	neoplasms	0.008966	1.00901	0.009141	0.326664	logistic	413059	12775	400284	2	0	0	0.463757	1	0.495873	HDL
Chronic prostatitis	genitourinary	0.022703	1.02296	0.023185	0.327486	logistic	445732	1897	443835	2	0	0	0.366306	1	0.545025	HDL
Actinic keratosis	dermatologic	-0.00881	0.991226	0.009101	0.332907	logistic	466538	15410	451128	2	0	0	0.133118	1	0.715221	HDL
Epilepsy, recurrent seizures, convulsions	neurological	-0.01253	0.98755	0.013013	0.335664	logistic	465560	5996	459564	2	0	0	0.021966	1	0.882177	HDL
Calcium	Biomarkers & Measurements	0.000149	NA	0.000156	0.339684	linear	358936	NA	NA	2	0.000491	2.3517	1.02408	1	0.311552	HDL
Secondary malignancy of bone	neoplasms	-0.01324	0.986849	0.014121	0.3485	logistic	469473	5109	464364	2	0.000727	32.5487	1.48255	1	0.223376	HDL
Pituitary hypofunction	endocrine/metabolic	0.041377	1.04225	0.04419	0.349087	logistic	469873	515	469358	2	0	0	0.008637	1	0.925957	HDL
Acute appendicitis	digestive	-0.02861	0.971795	0.030843	0.353614	logistic	478422	1058	477364	2	0.009484	81.7048	5.46591	1	0.019391	HDL
Mitral valve disease	circulatory system	-0.03583	0.9648	0.038915	0.357138	logistic	469881	664	469217	2	0	0	0.704761	1	0.401189	HDL
Total_bilirubin	Biomarkers & Measurements	-0.36173	NA	0.396202	0.36125	linear	407264	NA	NA	2	0.30541	97.2042	35.7685	1	2.22e-09	HDL
Other nondiabetic retinopathy	sense organs	-0.01761	0.982545	0.019495	0.366372	logistic	453138	2687	450451	2	0.002732	77.2828	4.40196	1	0.035898	HDL
Disorders of bilirubin excretion	endocrine/metabolic	-0.0288	0.971614	0.032369	0.373653	logistic	474666	963	473703	2	0	0	0.082054	1	0.774534	HDL
Varicose veins	circulatory system	0.007431	1.00746	0.008441	0.378683	logistic	453081	14592	438489	2	0.001007	36.743	1.58085	1	0.208638	HDL
Open wounds of extremities	injuries & poisonings	-0.02033	0.979878	0.02321	0.381152	logistic	469487	1887	467600	2	0	0	0.338104	1	0.560925	HDL
Other derangement of joint	musculoskeletal	-0.0229	0.977358	0.026219	0.382378	logistic	467082	1471	465611	2	0	0	0.10027	1	0.751505	HDL
Fracture of patella	injuries & poisonings	-0.02973	0.970706	0.034154	0.38401	logistic	468519	864	467655	2	0	0	0.317177	1	0.573309	HDL
Contracture of joint	musculoskeletal	-0.03362	0.966941	0.038858	0.386959	logistic	462378	668	461710	2	0	0	0.745616	1	0.387868	HDL
Psoriasis vulgaris	dermatologic	-0.012	0.988071	0.013899	0.387913	logistic	462271	5333	456938	2	0	0	0.554306	1	0.456563	HDL
Myeloproliferative disease	neoplasms	-0.01859	0.981585	0.021636	0.390286	logistic	476354	2161	474193	2	0	0	0.471016	1	0.49252	HDL
Separation of retinal layers	sense organs	0.02082	1.02104	0.024309	0.391728	logistic	452235	1703	450532	2	0	0	0.246915	1	0.619255	HDL
Diverticulosis	digestive	-0.01146	0.988609	0.013856	0.40836	logistic	461610	6162	455448	2	0.00489	57.4059	2.34774	1	0.125464	HDL
Aseptic necrosis of bone	musculoskeletal	0.033668	1.03424	0.04091	0.410514	logistic	459985	605	459380	2	0	0	0.006055	1	0.937978	HDL
Anisometropia	sense organs	-0.0279	0.972488	0.034408	0.41749	logistic	465169	856	464313	2	0.005975	71.4139	3.49821	1	0.061435	HDL
Pneumoconiosis	respiratory	-0.02869	0.971722	0.035695	0.421608	logistic	469939	795	469144	2	0	0	0.074772	1	0.784512	HDL
Other intestinal obstruction	digestive	-0.01111	0.988949	0.013866	0.422889	logistic	456087	5289	450798	2	7.12e-05	5.86601	1.06232	1	0.302688	HDL
Cancer of mouth	neoplasms	-0.02379	0.976487	0.02974	0.423678	logistic	476743	1136	475607	2	0	0	0.008377	1	0.927073	HDL
Benign neoplasm of pituitary gland and craniopharyngeal duct (pouch)	neoplasms	-0.02857	0.971835	0.036827	0.437885	logistic	477284	744	476540	2	0	0	0.099164	1	0.752835	HDL
Varicose veins of lower extremity, symptomtic	circulatory system	-0.01582	0.984305	0.020506	0.440429	logistic	453846	2444	451402	2	0	0	0.192361	1	0.660959	HDL
Nevus, non-neoplastic	neoplasms	-0.01703	0.983119	0.022072	0.440491	logistic	463248	2097	461151	2	0	0	0.992236	1	0.319196	HDL
Lack of coordination	neurological	-0.02279	0.977467	0.029607	0.441428	logistic	465491	1157	464334	2	0	0	0.969327	1	0.324848	HDL
Fracture of foot	injuries & poisonings	0.018312	1.01848	0.024499	0.45478	logistic	469173	1692	467481	2	0	0	0.113367	1	0.736343	HDL
Dermatitis due to solar radiation	dermatologic	-0.0238	0.976477	0.031858	0.454951	logistic	457883	994	456889	2	0	0	0.647102	1	0.421151	HDL
Ulcerative colitis (chronic)	digestive	0.022862	1.02313	0.030728	0.456878	logistic	455776	1067	454709	2	0	0	0.609428	1	0.435003	HDL
Disorders of iron metabolism	hematopoietic	-0.01935	0.980839	0.026007	0.456927	logistic	473975	1487	472488	2	0	0	0.015003	1	0.902512	HDL
Disorders of coccyx	musculoskeletal	-0.03049	0.969968	0.041474	0.462205	logistic	456271	585	455686	2	0	0	0.827868	1	0.36289	HDL
Gingivitis	digestive	-0.0157	0.984426	0.021514	0.465645	logistic	460736	2297	458439	2	0	0	0.116419	1	0.732951	HDL
Other vitamin B12 deficiency anemia	hematopoietic	-0.02019	0.98001	0.02792	0.469537	logistic	462671	1325	461346	2	0	0	0.402447	1	0.525828	HDL
Melanomas of skin, dx or hx	neoplasms	-0.01008	0.989972	0.014111	0.475091	logistic	463001	5139	457862	2	0	0	0.751424	1	0.386026	HDL
Neoplasm of uncertain behavior of skin	neoplasms	0.010151	1.0102	0.014248	0.476204	logistic	467133	5679	461454	2	0	0	0.0444	1	0.833112	HDL
Ankylosing spondylitis	musculoskeletal	-0.02426	0.976035	0.034144	0.477432	logistic	470962	862	470100	2	0	0	0.016854	1	0.896708	HDL
Malignant neoplasm of rectum, rectosigmoid junction, and anus	neoplasms	0.01169	1.01176	0.016492	0.478422	logistic	455419	3726	451693	2	0	0	0.242327	1	0.62253	HDL
Polymyalgia Rheumatica	musculoskeletal	-0.01229	0.987782	0.01742	0.480393	logistic	478556	3357	475199	2	0.001782	46.0606	1.85393	1	0.173327	HDL
Throat pain	respiratory	-0.02677	0.973583	0.037983	0.480906	logistic	450061	698	449363	2	0.011355	76.1149	4.18672	1	0.040742	HDL
Scar conditions and fibrosis of skin	dermatologic	0.011479	1.01154	0.016307	0.481465	logistic	464629	3811	460818	2	0	0	0.542207	1	0.46152	HDL
Diseases of spleen	hematopoietic	-0.02049	0.979719	0.029183	0.482614	logistic	468774	1182	467592	2	0	0	0.086224	1	0.769033	HDL
Uveitis, noninfectious or NOS	sense organs	-0.02154	0.978689	0.030869	0.485291	logistic	458680	1063	457617	2	0	0	0.196142	1	0.657853	HDL
Postlaminectomy syndrome	musculoskeletal	-0.02617	0.974171	0.037699	0.487589	logistic	456752	724	456028	2	0	0	0.159272	1	0.689828	HDL
Mean_corpuscular_volume	Biomarkers & Measurements	-0.30963	NA	0.449719	0.491135	linear	416061	NA	NA	2	0.384057	94.68	18.797	1	1.45e-05	HDL
Sprains and strains	injuries & poisonings	-0.01134	0.98872	0.016494	0.491587	logistic	465908	3939	461969	2	0	0	0.111061	1	0.738939	HDL
Acute posthemorrhagic anemia	hematopoietic	-0.02596	0.97437	0.038134	0.49596	logistic	462007	701	461306	2	0	0	0.043222	1	0.835308	HDL
Hypertrophy of breast (Gynecomastia)	genitourinary	-0.01793	0.982228	0.026614	0.500454	logistic	475805	1427	474378	2	0	0	0.826052	1	0.363417	HDL
Alcoholic liver damage	mental disorders	0.014696	1.0148	0.021856	0.501345	logistic	445484	2134	443350	2	0.001268	56.0861	2.27718	1	0.13129	HDL
Multiple sclerosis	neurological	0.014662	1.01477	0.021999	0.505092	logistic	465083	2084	462999	2	0.004504	72.6941	3.66221	1	0.05566	HDL
Corneal opacity and other disorders of cornea	sense organs	-0.01423	0.985876	0.021372	0.505667	logistic	453487	2211	451276	2	0	0	0.126354	1	0.722243	HDL
Dyspareunia	genitourinary	-0.01855	0.981624	0.028119	0.509517	logistic	413126	1277	411849	2	0.0032	41.6948	1.71511	1	0.190323	HDL
Primary thrombocytopenia	hematopoietic	-0.0233	0.976974	0.035415	0.510675	logistic	465609	803	464806	2	0	0	0.214031	1	0.643626	HDL
Mechanical complication of unspecified genitourinary device, implant, and graft	injuries & poisonings	-0.01442	0.985683	0.021968	0.511545	logistic	474057	2092	471965	2	0.031573	87.4806	7.98764	1	0.00471	HDL
Chorioretinal scars	sense organs	-0.0202	0.979999	0.031044	0.51517	logistic	454221	1065	453156	2	0	0	0.742315	1	0.38892	HDL
Parkinson's disease	neurological	-0.01054	0.989519	0.016702	0.528138	logistic	465569	3669	461900	2	0	0	0.70954	1	0.399597	HDL
Benign neoplasm of skin	neoplasms	-0.00589	0.994131	0.009414	0.531806	logistic	466231	11800	454431	2	0	0	0.157534	1	0.691437	HDL
Corneal degenerations	sense organs	0.016168	1.0163	0.02613	0.536081	logistic	453573	1475	452098	2	0	0	0.787903	1	0.374735	HDL
Pain, swelling or discharge of eye	sense organs	-0.02327	0.976995	0.03807	0.540974	logistic	453906	698	453208	2	0	0	0.422804	1	0.515541	HDL
Other unspecified back disorders	musculoskeletal	-0.02328	0.976993	0.038921	0.549827	logistic	456704	677	456027	2	0	0	0.21711	1	0.641251	HDL
Somatoform disorder	mental disorders	-0.01711	0.983039	0.028639	0.550289	logistic	438051	1332	436719	2	0	0	0.069092	1	0.792663	HDL
Suicide or self-inflicted injury	mental disorders	0.023588	1.02387	0.039768	0.553084	logistic	437310	664	436646	2	0.002743	45.154	1.82329	1	0.176922	HDL
Acute sinusitis	respiratory	-0.0107	0.989359	0.018312	0.559064	logistic	458347	3254	455093	2	0	0	0.415006	1	0.519439	HDL
Genu valgum or varum (acquired)	musculoskeletal	-0.01778	0.982376	0.030653	0.561866	logistic	462299	1072	461227	2	0.017775	82.8676	5.83689	1	0.015694	HDL
Keratitis	sense organs	-0.02415	0.976135	0.042203	0.5671	logistic	458376	565	457811	2	0	0	0.609966	1	0.434801	HDL
Diseases of white blood cells	hematopoietic	-0.01492	0.985192	0.026124	0.567956	logistic	469150	1483	467667	2	0	0	0.003793	1	0.950889	HDL
Hallucinations	mental disorders	-0.01945	0.980742	0.034263	0.570352	logistic	465582	856	464726	2	0.03068	84.7418	6.55386	1	0.010466	HDL
TC_cholesterol	Biomarkers & Measurements	-0.17673	NA	0.315704	0.575625	linear	409023	NA	NA	2	0.196568	98.5908	70.9641	1	3.64e-17	HDL
Irregular menstrual bleeding	genitourinary	-0.00919	0.990847	0.016465	0.576537	logistic	411237	3790	407447	2	0	0	0.06287	1	0.802016	HDL
Chronic periodontitis	digestive	-0.01102	0.989041	0.020284	0.58694	logistic	459737	2487	457250	2	0.000406	32.8186	1.48851	1	0.222448	HDL
Fracture of ribs	injuries & poisonings	-0.01839	0.98178	0.033857	0.587062	logistic	468820	887	467933	2	0	0	0.55269	1	0.457221	HDL
Rheumatism, unspecified and fibrositis	musculoskeletal	-0.02084	0.979379	0.039098	0.594083	logistic	449515	662	448853	2	0	0	0.322204	1	0.570286	HDL
Stiffness of joint	musculoskeletal	-0.01668	0.983459	0.031478	0.596196	logistic	466853	1020	465833	2	0	0	0.692246	1	0.405401	HDL
Acute reaction to stress	mental disorders	-0.02146	0.978771	0.04102	0.600896	logistic	437349	625	436724	2	0.011843	73.9719	3.842	1	0.049984	HDL
HDL_cholesterol	Biomarkers & Measurements	-0.15819	NA	0.303777	0.602541	linear	376040	NA	NA	2	0.182025	98.6068	71.7749	1	2.41e-17	HDL
Carcinoma in situ of skin	neoplasms	-0.01173	0.988339	0.022528	0.602607	logistic	462232	2010	460222	2	0.00088	40.457	1.67946	1	0.194996	HDL
Benign neoplasm of brain, cranial nerves, meninges	neoplasms	-0.01312	0.986969	0.025257	0.603531	logistic	474635	1581	473054	2	0.004863	70.3722	3.37521	1	0.066184	HDL
Appendicitis	digestive	0.013459	1.01355	0.026032	0.605155	logistic	478176	1483	476693	2	0	0	0.000226	1	0.988017	HDL
Disorders of external ear	sense organs	0.015123	1.01524	0.029316	0.605943	logistic	463630	1176	462454	2	0	0	0.094207	1	0.758895	HDL
Torsion dystonia	neurological	-0.01979	0.980403	0.038814	0.610113	logistic	464935	669	464266	2	0	0	0.188909	1	0.663826	HDL
Joint/ligament sprain	injuries & poisonings	0.017996	1.01816	0.035463	0.611844	logistic	463103	805	462298	2	0	0	0.709313	1	0.399672	HDL
Voice disturbance	respiratory	-0.00907	0.990966	0.018368	0.621272	logistic	451517	3059	448458	2	0	0	0.543476	1	0.460996	HDL
Chronic pharyngitis and nasopharyngitis	respiratory	0.008259	1.00829	0.016922	0.625496	logistic	452203	3667	448536	2	0	0	0.006125	1	0.93762	HDL
Herpes simplex	infectious diseases	-0.0123	0.987777	0.025336	0.627388	logistic	463373	1619	461754	2	0.007786	79.6994	4.92596	1	0.026456	HDL
Hydrocele	genitourinary	0.009265	1.00931	0.019649	0.637275	logistic	439047	2652	436395	2	0	0	0.076595	1	0.781966	HDL
Phlebitis and thrombophlebitis of lower extremities	circulatory system	0.011392	1.01146	0.024348	0.639879	logistic	452980	1700	451280	2	0.008769	75.3561	4.0578	1	0.043968	HDL
Nonspecific abnormal findings on radiological and other examination of biliary tract	digestive	0.016523	1.01666	0.035444	0.641102	logistic	473911	801	473110	2	0.007277	62.7481	2.68442	1	0.101334	HDL
Acquired hypothyroidism	endocrine/metabolic	0.017928	1.01809	0.038493	0.641395	logistic	466776	685	466091	2	0	0	0.01363	1	0.907059	HDL
Other conditions of brain, NOS	neurological	-0.01853	0.981641	0.040987	0.651218	logistic	464953	600	464353	2	0	0	0.158671	1	0.690383	HDL
Nontoxic multinodular goiter	endocrine/metabolic	0.011401	1.01147	0.025328	0.652613	logistic	466965	1585	465380	2	0.001889	57.8419	2.37202	1	0.123527	HDL
Postmenopausal bleeding	genitourinary	0.004497	1.00451	0.010016	0.653458	logistic	411276	10559	400717	2	0	0	0.014342	1	0.904674	HDL
Empyema and pneumothorax	respiratory	-0.00915	0.990894	0.020417	0.654137	logistic	470020	2421	467599	2	0.001641	47.9367	1.92074	1	0.165775	HDL
Lipoma of skin and subcutaneous tissue	neoplasms	-0.00568	0.994332	0.012761	0.656003	logistic	474544	6248	468296	2	0.000458	40.2413	1.6734	1	0.195804	HDL
Other dyschromia	dermatologic	0.009063	1.0091	0.020347	0.656022	logistic	462773	2482	460291	2	0	0	0.47796	1	0.489348	HDL
Blood in stool	digestive	-0.00568	0.994334	0.012796	0.657003	logistic	467385	6286	461099	2	0	0	0.689915	1	0.406193	HDL
Fracture of unspecified bones	injuries & poisonings	-0.01187	0.988196	0.02714	0.661733	logistic	469322	1393	467929	2	0	0	0.931473	1	0.33448	HDL
Disorders of diaphragm	respiratory	0.019146	1.01933	0.044589	0.667637	logistic	475570	508	475062	2	0	0	0.087066	1	0.767941	HDL
Disease of tricuspid valve	circulatory system	-0.01228	0.987791	0.028846	0.670216	logistic	469952	1212	468740	2	0.002922	45.5501	1.83655	1	0.175356	HDL
Corneal dystrophy	sense organs	-0.014	0.9861	0.034278	0.683016	logistic	453621	858	452763	2	0	0	0.73049	1	0.392725	HDL
Melanomas of skin	neoplasms	-0.00562	0.994396	0.014419	0.696725	logistic	462768	4906	457862	2	0	0	0.116807	1	0.732524	HDL
Malignant neoplasm of female breast	neoplasms	0.003701	1.00371	0.009579	0.699229	logistic	413196	11568	401628	2	0	0	0.283036	1	0.594718	HDL
Polycythemia vera	neoplasms	0.012992	1.01308	0.034384	0.705534	logistic	471566	854	470712	2	0	0	0.839663	1	0.359493	HDL
Esophageal bleeding (varices/hemorrhage)	digestive	-0.00741	0.99262	0.019684	0.706676	logistic	446245	2607	443638	2	0.005453	78.76	4.7081	1	0.030021	HDL
Effects radiation NOS	injuries & poisonings	0.003842	1.00385	0.010536	0.715364	logistic	476345	9265	467080	2	0	0	0.039633	1	0.842199	HDL
Diseases of lips	digestive	-0.0109	0.989155	0.03012	0.717328	logistic	472585	1107	471478	2	0	0	0.109042	1	0.741238	HDL
Cancer of prostate	neoplasms	0.00271	1.00271	0.007513	0.718342	logistic	450304	20225	430079	2	0	0	0.157682	1	0.6913	HDL
Injuries to the nervous system	injuries & poisonings	-0.0087	0.991339	0.024154	0.718748	logistic	477647	1732	475915	2	0	0	0.369183	1	0.54345	HDL
Substance addiction and disorders	mental disorders	0.004601	1.00461	0.012815	0.719581	logistic	451910	7851	444059	2	0.000578	36.4277	1.57301	1	0.20977	HDL
Acquired foot deformities	musculoskeletal	-0.00295	0.997051	0.008454	0.726876	logistic	463817	14690	449127	2	0.000255	41.9707	1.72327	1	0.189273	HDL
Mycoses	infectious diseases	0.014061	1.01416	0.040532	0.728658	logistic	457975	614	457361	2	0	0	0.028115	1	0.86684	HDL
Swelling, mass, or lump in head and neck [Space-occupying lesion, intracranial NOS]	mental disorders	-0.00704	0.992983	0.020691	0.73361	logistic	476513	2376	474137	2	0	0	0.01621	1	0.898688	HDL
Other allied disorders of spine	musculoskeletal	-0.0119	0.98817	0.036189	0.742269	logistic	456240	766	455474	2	0	0	0.414473	1	0.519708	HDL
Cardiac shunt/ heart septal defect	congenital anomalies	0.01022	1.01027	0.031782	0.747773	logistic	477500	995	476505	2	0.000473	9.53493	1.1054	1	0.293084	HDL
Disorders of sacrum	musculoskeletal	-0.01044	0.989611	0.033113	0.752468	logistic	456542	921	455621	2	0.001548	41.0534	1.69645	1	0.192753	HDL
Disorders of muscle, ligament, and fascia	musculoskeletal	-0.01211	0.987967	0.038525	0.753344	logistic	449430	680	448750	2	0.00808	67.4728	3.07435	1	0.079537	HDL
Osteopenia or other disorder of bone and cartilage	musculoskeletal	-0.00621	0.993811	0.020015	0.756419	logistic	474231	2716	471515	2	0.000655	28.8703	1.40588	1	0.235741	HDL
Other paralytic syndromes	neurological	-0.00783	0.992197	0.02555	0.759159	logistic	465261	1551	463710	2	0	0	0.593708	1	0.440989	HDL
Other diseases of blood and blood-forming organs	hematopoietic	-0.00679	0.993237	0.022328	0.761174	logistic	468884	2025	466859	2	0.002434	54.8267	2.2137	1	0.13679	HDL
Osteoarthrosis, localized, secondary	musculoskeletal	-0.00566	0.994355	0.01899	0.765618	logistic	448110	2807	445303	2	0.000701	41.0561	1.69653	1	0.192743	HDL
Swelling of limb	symptoms	0.008892	1.00893	0.030026	0.767112	logistic	473189	1140	472049	2	0	0	0.717547	1	0.39695	HDL
Macular degeneration (senile) of retina NOS	sense organs	0.00344	1.00345	0.011687	0.768493	logistic	453280	7659	445621	2	0	0	0.021526	1	0.883355	HDL
Acute gastritis	digestive	0.010731	1.01079	0.036553	0.769095	logistic	468648	753	467895	2	0	0	0.991676	1	0.319333	HDL
Fracture of tibia and fibula	injuries & poisonings	0.006249	1.00627	0.021331	0.769543	logistic	468795	2215	466580	2	0	0	0.37424	1	0.540702	HDL
Phlebitis and thrombophlebitis	circulatory system	-0.00608	0.993937	0.020854	0.770595	logistic	452997	2319	450678	2	0	0	0.109673	1	0.740516	HDL
Anemia in neoplastic disease	hematopoietic	-0.01001	0.99004	0.035269	0.776542	logistic	461779	810	460969	2	0	0	0.086874	1	0.76819	HDL
Flat foot	musculoskeletal	-0.00649	0.993527	0.022927	0.77699	logistic	463844	1997	461847	2	0	0	0.012169	1	0.91216	HDL
Nonspecific findings on examination of blood	symptoms	-0.01101	0.989054	0.039023	0.777902	logistic	470299	661	469638	2	0.00886	68.0628	3.13114	1	0.07681	HDL
Decreased white blood cell count	hematopoietic	-0.00366	0.996347	0.013203	0.781659	logistic	468902	5834	463068	2	0	0	7.36e-05	1	0.993153	HDL
Secondary malignancy of respiratory organs	neoplasms	-0.00382	0.99619	0.014131	0.787048	logistic	469319	5092	464227	2	0.019941	88.977	9.07197	1	0.002596	HDL
Bronchopneumonia and lung abscess	respiratory	-0.0087	0.991339	0.033957	0.797811	logistic	462433	872	461561	2	0	0	0.233812	1	0.628712	HDL
Primary angle-closure glaucoma	sense organs	0.005562	1.00558	0.021965	0.800112	logistic	454076	2114	451962	2	0	0	0.011384	1	0.915032	HDL
Fracture of vertebral column without mention of spinal cord injury	injuries & poisonings	0.008129	1.00816	0.032151	0.800391	logistic	468994	988	468006	2	0	0	0.637876	1	0.424481	HDL
Chronic fatigue syndrome	symptoms	0.006547	1.00657	0.027276	0.810296	logistic	465409	1356	464053	2	0.00396	66.7913	3.01126	1	0.082688	HDL
Intestinal infection due to C. difficile	infectious diseases	-0.00635	0.993673	0.026642	0.811707	logistic	476480	1419	475061	2	0.005915	70.8538	3.43098	1	0.063984	HDL
Benign neoplasm of male genital organs	neoplasms	0.009897	1.00995	0.041558	0.811764	logistic	466239	591	465648	2	0.002673	41.9287	1.72202	1	0.189433	HDL
Fracture of humerus	injuries & poisonings	0.00434	1.00435	0.018236	0.811868	logistic	468681	3041	465640	2	0.005769	79.4399	4.8638	1	0.027426	HDL
Other retinal disorders	sense organs	-0.00251	0.997496	0.010694	0.814664	logistic	452472	9053	443419	2	0.000984	41.7536	1.71684	1	0.1901	HDL
Bipolar	mental disorders	0.003469	1.00347	0.015054	0.817769	logistic	440860	5398	435462	2	0	0	0.801151	1	0.37075	HDL
Acute prostatitis	genitourinary	0.009227	1.00927	0.041697	0.82487	logistic	445352	581	444771	2	0.005558	58.6161	2.4164	1	0.120071	HDL
Other non-epithelial cancer of skin	neoplasms	0.001774	1.00178	0.008239	0.829569	logistic	468125	16331	451794	2	0	0	0.069595	1	0.791928	HDL
Wheezing	respiratory	-0.00707	0.992952	0.0331	0.830788	logistic	447946	925	447021	2	0	0	0.157117	1	0.691825	HDL
Platelet_count	Biomarkers & Measurements	-0.12864	NA	0.648089	0.842655	linear	416087	NA	NA	2	0.814627	96.934	32.6161	1	1.12e-08	HDL
Hemorrhage from gastrointestinal ulcer	digestive	0.005966	1.00598	0.030199	0.843403	logistic	475435	1105	474330	2	6.93e-05	1.78517	1.01818	1	0.312952	HDL
Noninfectious disorders of lymphatic channels	circulatory system	-0.0041	0.99591	0.021047	0.845624	logistic	478224	2280	475944	2	0	0	0.904169	1	0.341666	HDL
Visual field defects	sense organs	0.004469	1.00448	0.024246	0.853759	logistic	465733	1738	463995	2	0	0	0.295112	1	0.586963	HDL
Neutropenia	hematopoietic	-0.00236	0.997643	0.013098	0.857043	logistic	468998	5930	463068	2	0	0	0.127069	1	0.721491	HDL
Multiple myeloma	neoplasms	-0.00494	0.995069	0.028179	0.860743	logistic	476110	1270	474840	2	0	0	0.48111	1	0.48792	HDL
Cancer of tongue	neoplasms	0.006716	1.00674	0.038305	0.860818	logistic	476815	687	476128	2	0	0	0.273718	1	0.600848	HDL
Other disorders of soft tissues	musculoskeletal	-0.00542	0.994594	0.031389	0.862902	logistic	449566	1023	448543	2	0	0	0.783004	1	0.376224	HDL
Rheumatoid_factor	Biomarkers & Measurements	-0.00406	NA	0.023879	0.865133	linear	37501	NA	NA	2	0	0	0.044869	1	0.832246	HDL
Benign neoplasm of adrenal gland	neoplasms	-0.00624	0.993775	0.037829	0.86889	logistic	477339	707	476632	2	0	0	0.189489	1	0.663343	HDL
Cystic mastopathy	genitourinary	0.004961	1.00497	0.030785	0.871978	logistic	412787	1067	411720	2	0	0	0.00283	1	0.957573	HDL
Nasal polyps	respiratory	0.002364	1.00237	0.015172	0.876184	logistic	450420	4405	446015	2	0	0	0.037792	1	0.845862	HDL
Retinal detachments and defects	sense organs	-0.00295	0.997058	0.019866	0.882117	logistic	454333	2579	451754	2	0	0	0.010759	1	0.917388	HDL
Congenital deformities of feet	congenital anomalies	-0.00413	0.995881	0.02822	0.883706	logistic	475914	1283	474631	2	0	0	0.000827	1	0.977051	HDL
Neoplasm of unspecified nature of digestive system	neoplasms	-0.0037	0.996302	0.025349	0.883796	logistic	472839	1568	471271	2	0.000834	21.3098	1.27081	1	0.259615	HDL
Eustachian tube disorders	sense organs	0.004207	1.00422	0.031127	0.892478	logistic	469930	1055	468875	2	0	0	0.013351	1	0.908012	HDL
Optic neuritis/neuropathy	sense organs	-0.00429	0.995722	0.037471	0.908907	logistic	453952	724	453228	2	0	0	0.043732	1	0.834353	HDL
Hallux rigidus	musculoskeletal	-0.00212	0.997886	0.018878	0.910733	logistic	462944	2851	460093	2	0	0	0.015045	1	0.902377	HDL
Other benign neoplasm of connective and other soft tissue	neoplasms	-0.00349	0.996514	0.032188	0.913597	logistic	473901	973	472928	2	0	0	0.260237	1	0.609957	HDL
Pulmonary heart disease	circulatory system	0.002	1.002	0.018933	0.915857	logistic	473562	2830	470732	2	0.002097	69.8706	3.31902	1	0.068483	HDL
Hyposmolality and/or hyponatremia	endocrine/metabolic	0.001206	1.00121	0.011629	0.917419	logistic	466023	7599	458424	2	0.001487	76.7639	4.30365	1	0.038031	HDL
Psychosis	mental disorders	0.002591	1.00259	0.026404	0.921831	logistic	438095	1541	436554	2	0	0	0.105266	1	0.745599	HDL
Hallux valgus (Bunion)	musculoskeletal	-0.0009	0.999098	0.010223	0.929664	logistic	463744	9948	453796	2	0.001603	80.4296	5.10977	1	0.023792	HDL
Tinnitus	sense organs	0.000948	1.00095	0.011212	0.932595	logistic	450354	10222	440132	2	0.000444	47.4184	1.9018	1	0.167876	HDL
Menopausal and postmenopausal disorders	genitourinary	-0.00076	0.999245	0.009247	0.934916	logistic	411282	12506	398776	2	0.00728	66.0512	2.94561	1	0.086111	HDL
Hammer toe (acquired)	musculoskeletal	0.001132	1.00113	0.014626	0.938333	logistic	464241	4840	459401	2	0	0	0.783493	1	0.376075	HDL
Glaucoma	sense organs	0.000626	1.00063	0.008129	0.938602	logistic	460226	16862	443364	2	5.72e-05	28.6527	1.40159	1	0.236457	HDL
Sacroiliitis NEC	musculoskeletal	0.003179	1.00318	0.041367	0.93875	logistic	471208	592	470616	2	0.007308	61.4037	2.59092	1	0.107478	HDL
Other open wound of head and face	injuries & poisonings	-0.00273	0.997269	0.03927	0.944477	logistic	468760	652	468108	2	0	0	0.858628	1	0.354123	HDL
Other disorders of prostate	genitourinary	0.001386	1.00139	0.020689	0.946596	logistic	445747	2401	443346	2	0	0	0.474457	1	0.490944	HDL
Other acquired deformities of limbs	musculoskeletal	0.001298	1.0013	0.021437	0.951715	logistic	462504	2195	460309	2	0.003463	67.5957	3.08601	1	0.078968	HDL
Hyperplasia of prostate	genitourinary	0.000365	1.00036	0.006179	0.95289	logistic	461504	36574	424930	2	0	0	0.560016	1	0.454254	HDL
Irregular menstrual cycle	genitourinary	0.001349	1.00135	0.023084	0.953404	logistic	411322	1914	409408	2	0	0	0.018249	1	0.892543	HDL
Obsessive-compulsive disorders	mental disorders	-0.00203	0.99797	0.038141	0.957519	logistic	437385	723	436662	2	0	0	0.003905	1	0.950173	HDL
Nodular lymphoma	neoplasms	-0.00145	0.998548	0.039203	0.97044	logistic	476067	658	475409	2	0.0066	55.9927	2.27235	1	0.1317	HDL
Spondylosis with myelopathy	musculoskeletal	0.00105	1.00105	0.032299	0.97406	logistic	456757	981	455776	2	0.009397	80.7581	5.19699	1	0.022626	HDL
Atrophic gastritis	digestive	0.000745	1.00074	0.033953	0.982505	logistic	468713	875	467838	2	0	0	0.085126	1	0.770467	HDL
Peripheral retinal degenerations	sense organs	0.000653	1.00065	0.030384	0.982857	logistic	452918	1114	451804	2	0	0	0.471952	1	0.49209	HDL
Rosacea	dermatologic	-0.00041	0.999595	0.02057	0.984291	logistic	463411	2477	460934	2	0.001139	51.4584	2.06009	1	0.151201	HDL
Skull and face fracture and other intercranial injury	injuries & poisonings	-0.00032	0.999685	0.018837	0.986646	logistic	476131	2984	473147	2	0	0	0.410647	1	0.521641	HDL
Cancer of connective tissue	neoplasms	-0.00066	0.999339	0.040408	0.986935	logistic	478383	617	477766	2	0.000585	10.9109	1.12247	1	0.289387	HDL
Impacted cerumen	sense organs	-0.00013	0.999869	0.0133	0.992151	logistic	469403	6678	462725	2	0.001565	59.3364	2.4592	1	0.116838	HDL
Nontoxic uninodular goiter	endocrine/metabolic	2.06e-05	1.00002	0.021731	0.999242	logistic	467722	2187	465535	2	0.000437	30.6113	1.44116	1	0.229952	HDL
Mixed hyperlipidemia	endocrine/metabolic	0.480594	1.61704	0.013546	1.04e-275	logistic	437271	10712	426559	2	0	0	0.000242	1	0.9876	TC
Direct_bilirubin	Biomarkers & Measurements	-0.04946	NA	0.001434	1.06e-260	linear	342100	NA	NA	2	0.03944	90.6107	10.6504	1	0.0011	TC
Coronary atherosclerosis	circulatory system	0.155067	1.16774	0.0053	3.37e-188	logistic	470828	45025	425803	2	0	0	0.643701	1	0.422374	TC
Other chronic ischemic heart disease, unspecified	circulatory system	0.144291	1.15522	0.005979	1.08e-128	logistic	464642	33149	431493	2	0.000493	83.3574	6.00867	1	0.014236	TC
Angina pectoris	circulatory system	0.142712	1.1534	0.006533	8.57e-106	logistic	457979	25846	432133	2	0	0	0.001174	1	0.972668	TC
Myocardial infarction	circulatory system	0.143711	1.15455	0.007324	1.03e-85	logistic	459336	20414	438922	2	0.000397	68.7549	3.2005	1	0.073616	TC
Calcium	Biomarkers & Measurements	0.002884	NA	0.000156	3.16e-76	linear	358936	NA	NA	2	0.115803	85.0032	6.66807	1	0.009816	TC
Haematocrit_percentage	Biomarkers & Measurements	-0.07176	NA	0.004592	4.69e-55	linear	416093	NA	NA	2	0.114993	82.5526	5.73151	1	0.016663	TC
Haemoglobin_concentration	Biomarkers & Measurements	-0.0242	NA	0.001561	3.34e-54	linear	416091	NA	NA	2	0.097074	79.4065	4.85589	1	0.027552	TC
Unstable angina (intermediate coronary syndrome)	circulatory system	0.161458	1.17522	0.011626	7.47e-44	logistic	456664	7651	449013	2	0	0	0.820823	1	0.36494	TC
Dementias	mental disorders	0.172938	1.18879	0.014444	4.92e-33	logistic	466444	4961	461483	2	0.005466	88.8379	8.95887	1	0.002761	TC
Mean_corpuscular_volume	Biomarkers & Measurements	-0.07972	NA	0.006892	6.03e-31	linear	416061	NA	NA	2	0.086108	79.8345	4.95896	1	0.025956	TC
Alzheimer's disease	mental disorders	0.234726	1.26456	0.020429	1.48e-30	logistic	465784	2446	463338	2	0.017109	89.6751	9.68536	1	0.001857	TC
Nonrheumatic aortic valve disorders	circulatory system	0.129684	1.13847	0.011539	2.63e-29	logistic	471842	7855	463987	2	0	0	0.01949	1	0.88897	TC
Hyperglyceridemia	endocrine/metabolic	0.235739	1.26584	0.021432	3.85e-28	logistic	429284	2562	426722	2	0.031374	88.0026	8.33511	1	0.003889	TC
Abdominal aortic aneurysm	circulatory system	0.170267	1.18562	0.016528	6.9e-25	logistic	466749	3854	462895	2	0	0	0.003195	1	0.954925	TC
Delirium dementia and amnestic and other cognitive disorders	mental disorders	0.129028	1.13772	0.012813	7.5e-24	logistic	466104	6302	459802	2	0.010777	92.0603	12.5949	1	0.000387	TC
Celiac disease	digestive	-0.18996	0.826991	0.018868	7.67e-24	logistic	455750	2836	452914	2	0.013036	79.7341	4.93441	1	0.026327	TC
HbA1c	Biomarkers & Measurements	0.101202	NA	0.010097	1.21e-23	linear	404379	NA	NA	2	0	0	0.245865	1	0.620002	TC
BMI	Biomarkers & Measurements	-0.07163	NA	0.007304	1.06e-22	linear	422316	NA	NA	2	0.002777	78.0998	4.56616	1	0.03261	TC
Cholelithiasis	digestive	-0.0668	0.935378	0.00705	2.64e-21	logistic	475387	21337	454050	2	0.000792	69.3398	3.26155	1	0.070922	TC
Mean_corpuscular_haemoglobin	Biomarkers & Measurements	-0.02659	NA	0.00286	1.43e-20	linear	416065	NA	NA	2	0.064434	74.7474	3.95999	1	0.046594	TC
Aspartate_aminotransferase	Biomarkers & Measurements	0.151997	NA	0.0165	3.2e-20	linear	407225	NA	NA	2	0.015641	62.8743	2.69355	1	0.100755	TC
Total_bilirubin	Biomarkers & Measurements	-0.0596	NA	0.006855	3.48e-18	linear	407264	NA	NA	2	0.052218	85.4874	6.89055	1	0.008665	TC
Occlusion and stenosis of precerebral arteries	circulatory system	0.119392	1.12681	0.014369	9.66e-17	logistic	469755	5134	464621	2	0	0	0.63205	1	0.426604	TC
Peripheral vascular disease, unspecified	circulatory system	0.084645	1.08833	0.01078	4.1e-15	logistic	469356	9278	460078	2	0	0	0.164528	1	0.685021	TC
Disorders of iron metabolism	hematopoietic	-0.19458	0.823182	0.026066	8.34e-14	logistic	473975	1487	472488	2	0.016294	89.6437	9.65599	1	0.001887	TC
CRP	Biomarkers & Measurements	-0.05048	NA	0.006965	4.25e-13	linear	392203	NA	NA	2	0.021695	83.7605	6.15785	1	0.013083	TC
Cholelithiasis with other cholecystitis	digestive	-0.07944	0.92363	0.011063	6.91e-13	logistic	474079	8384	465695	2	0.001151	40.3064	1.67522	1	0.19556	TC
Red_blood_cell_erythrocyte_count	Biomarkers & Measurements	-0.00398	NA	0.000558	9.31e-13	linear	415892	NA	NA	2	0.058277	73.2557	3.73911	1	0.053153	TC
Platelet_count	Biomarkers & Measurements	0.599558	NA	0.084352	1.18e-12	linear	416087	NA	NA	2	0.004757	15.4984	1.18341	1	0.276663	TC
Essential hypertension	circulatory system	0.023501	1.02378	0.003393	4.35e-12	logistic	474181	162855	311326	2	4.7e-05	47.8081	1.91601	1	0.166297	TC
Other aneurysm	circulatory system	0.10635	1.11221	0.01587	2.07e-11	logistic	465022	4042	460980	2	0.009763	65.3528	2.88624	1	0.089339	TC
Monocyte_percentage	Biomarkers & Measurements	-0.02729	NA	0.004194	7.64e-11	linear	412668	NA	NA	2	0	0	0.616405	1	0.432386	TC
Heart failure NOS	circulatory system	0.070223	1.07275	0.010851	9.68e-11	logistic	468348	8853	459495	2	0.000568	61.6708	2.60898	1	0.10626	TC
Hyperlipidemia	endocrine/metabolic	0.379462	1.4615	0.059322	1.59e-10	logistic	469725	100984	368741	2	0.006976	99.1186	113.457	1	1.71e-26	TC
Other acute and subacute forms of ischemic heart disease	circulatory system	0.119374	1.12679	0.018716	1.79e-10	logistic	455460	2885	452575	2	0	0	0.110114	1	0.740014	TC
Aortic aneurysm	circulatory system	0.094631	1.09925	0.015949	2.97e-09	logistic	465787	4020	461767	2	0.003159	80.4928	5.1263	1	0.023566	TC
Atherosclerosis of the extremities	circulatory system	0.114887	1.12175	0.021815	1.39e-07	logistic	465527	2134	463393	2	0	0	0.266463	1	0.605714	TC
Atherosclerosis	circulatory system	0.112584	1.11917	0.021411	1.45e-07	logistic	465186	2210	462976	2	0.003534	61.077	2.56917	1	0.108965	TC
Monocyte_count	Biomarkers & Measurements	-0.00179	NA	0.000344	1.85e-07	linear	411412	NA	NA	2	0	0	0.724122	1	0.394795	TC
Heart valve replaced	circulatory system	0.084645	1.08833	0.016399	2.45e-07	logistic	470726	3808	466918	2	0.002872	79.4774	4.87267	1	0.027285	TC
Other forms of chronic heart disease	circulatory system	0.060219	1.06207	0.011851	3.75e-07	logistic	456618	7353	449265	2	0	0	9.21e-05	1	0.992343	TC
Stricture of artery	circulatory system	0.129327	1.13806	0.025648	4.6e-07	logistic	465026	1530	463496	2	0	0	0.481787	1	0.487614	TC
Alanine_aminotransferase	Biomarkers & Measurements	0.107739	NA	0.021557	5.8e-07	linear	409045	NA	NA	2	0.049897	84.7162	6.54288	1	0.01053	TC
Atherosclerosis of native arteries of the extremities with intermittent claudication	circulatory system	0.141311	1.15178	0.028789	9.18e-07	logistic	466020	1266	464754	2	0	0	0.347845	1	0.555336	TC
Obesity	endocrine/metabolic	-0.02475	0.975554	0.005108	1.27e-06	logistic	468207	48677	419530	2	0	0	0.609305	1	0.43505	TC
Lymphocyte_percentage	Biomarkers & Measurements	0.055971	NA	0.011565	1.3e-06	linear	412481	NA	NA	2	0	0	0.012295	1	0.911708	TC
Benign neoplasm of colon	neoplasms	0.023466	1.02374	0.004849	1.31e-06	logistic	469660	50110	419550	2	0.000262	80.032	5.00802	1	0.02523	TC
Iron deficiency anemias, unspecified or not due to blood loss	hematopoietic	0.035422	1.03606	0.007553	2.74e-06	logistic	464702	18480	446222	2	5.33e-05	19.8898	1.24828	1	0.263881	TC
Other specified cardiac dysrhythmias	circulatory system	0.046206	1.04729	0.010101	4.78e-06	logistic	454307	10576	443731	2	3.39e-05	13.4132	1.15491	1	0.282524	TC
Glucose	Biomarkers & Measurements	-0.00917	NA	0.002011	5.16e-06	linear	357420	NA	NA	2	0	0	0.754519	1	0.385049	TC
Overweight, obesity and other hyperalimentation	endocrine/metabolic	-0.02637	0.973978	0.005933	8.84e-06	logistic	450098	30706	419392	2	0	0	0.003913	1	0.950122	TC
Other disorders of arteries and arterioles	circulatory system	0.086724	1.0906	0.020593	2.54e-05	logistic	465068	2381	462687	2	0	0	0.520946	1	0.470438	TC
Cerebrovascular disease	circulatory system	0.033789	1.03437	0.00824	4.12e-05	logistic	467783	15578	452205	2	0.000902	52.1709	2.09078	1	0.148191	TC
Fracture of neck of femur	injuries & poisonings	-0.06351	0.938465	0.015565	4.5e-05	logistic	468653	4208	464445	2	0.001417	47.9553	1.92142	1	0.1657	TC
Other anemias	hematopoietic	0.024711	1.02502	0.006083	4.86e-05	logistic	469524	29869	439655	2	0	0	0.056447	1	0.812202	TC
Thyrotoxicosis with or without goiter	endocrine/metabolic	-0.06712	0.93508	0.016672	5.67e-05	logistic	466949	3661	463288	2	0	0	0.913369	1	0.339222	TC
Hyposmolality and/or hyponatremia	endocrine/metabolic	0.046773	1.04788	0.011628	5.76e-05	logistic	466023	7599	458424	2	0	0	0.514509	1	0.473193	TC
Hypercholesterolemia	endocrine/metabolic	0.426996	1.53265	0.108398	8.18e-05	logistic	434788	61781	373007	2	0.023365	99.4243	173.697	1	1.15e-39	TC
Complication of internal orthopedic device	injuries & poisonings	-0.06425	0.937775	0.016334	8.38e-05	logistic	474541	3803	470738	2	0	0	0.271237	1	0.602503	TC
Graves' disease	endocrine/metabolic	-0.12712	0.880627	0.033131	0.000124602	logistic	466574	923	465651	2	0	0	0.007322	1	0.931809	TC
Cardiac conduction disorders	circulatory system	0.033305	1.03387	0.008729	0.000135851	logistic	450874	13864	437010	2	2.19e-06	0.320577	1.00322	1	0.316534	TC
Syncope and collapse	symptoms	0.028366	1.02877	0.007482	0.000149972	logistic	475613	18816	456797	2	0.000881	82.0532	5.57202	1	0.01825	TC
Osteoarthritis; localized	musculoskeletal	-0.01664	0.983498	0.004398	0.000154518	logistic	455558	61920	393638	2	0.000205	69.5695	3.28618	1	0.069865	TC
Ventricular fibrillation and flutter	circulatory system	0.136981	1.14681	0.036476	0.000173103	logistic	450144	756	449388	2	0	0	0.445607	1	0.504429	TC
Cardiomegaly	circulatory system	0.042732	1.04366	0.011402	0.000178499	logistic	473702	7912	465790	2	0.000226	25.9741	1.35088	1	0.245125	TC
Cholelithiasis with acute cholecystitis	digestive	-0.07031	0.932101	0.018999	0.000214866	logistic	473934	2799	471135	2	0	0	0.080032	1	0.777254	TC
Systemic lupus erythematosus	dermatologic	-0.15172	0.859226	0.041085	0.000221723	logistic	461337	597	460740	2	0	0	0.20138	1	0.653609	TC
Arterial embolism and thrombosis of lower extremity artery	circulatory system	0.105036	1.11075	0.02913	0.000311164	logistic	465189	1191	463998	2	0	0	0.144188	1	0.704153	TC
Jaundice (not of newborn)	digestive	-0.08837	0.915426	0.024686	0.000344195	logistic	465699	1653	464046	2	0	0	0.839374	1	0.359576	TC
Type 1 diabetes	endocrine/metabolic	-0.0505	0.950754	0.014158	0.000361384	logistic	449259	5114	444145	2	0	0	0.020448	1	0.886294	TC
Cardiac pacemaker in situ	circulatory system	0.043326	1.04428	0.012203	0.000384832	logistic	451875	7083	444792	2	0	0	0.077891	1	0.780177	TC
Dermatophytosis	infectious diseases	-0.08955	0.914338	0.025253	0.000390598	logistic	459006	1615	457391	2	0	0	0.047781	1	0.82697	TC
Congestive heart failure (CHF) NOS	circulatory system	0.038109	1.03885	0.011266	0.000717545	logistic	470133	8432	461701	2	0.002898	91.7332	12.0966	1	0.000505	TC
Mitral valve stenosis and aortic valve stenosis	circulatory system	0.07639	1.07938	0.022715	0.000770992	logistic	469963	1958	468005	2	0	0	0.933009	1	0.334082	TC
Decubitus ulcer	dermatologic	0.053191	1.05463	0.015919	0.000833746	logistic	474839	4006	470833	2	0.006967	87.4266	7.95331	1	0.0048	TC
TC_cholesterol	Biomarkers & Measurements	0.500235	NA	0.156056	0.00134835	linear	409023	NA	NA	2	0.046045	94.2207	17.3033	1	3.19e-05	TC
Cardiac pacemaker/device in situ	circulatory system	0.042016	1.04291	0.013109	0.00135041	logistic	450409	5966	444443	2	0	0	0.913022	1	0.339314	TC
Red_blood_cell_erythrocyte_distribution_width	Biomarkers & Measurements	-0.00481	NA	0.001508	0.00141041	linear	413847	NA	NA	2	0.040329	66.6733	3.0006	1	0.083234	TC
Osteoarthrosis, localized, primary	musculoskeletal	-0.02232	0.977923	0.007014	0.00145921	logistic	453299	22156	431143	2	1.24e-05	8.40655	1.09178	1	0.296077	TC
Hypotension NOS	circulatory system	0.030329	1.03079	0.009748	0.00186385	logistic	469349	10880	458469	2	0	0	0.168334	1	0.681596	TC
Glucocorticoid deficiency	endocrine/metabolic	-0.12985	0.878224	0.042724	0.00237092	logistic	469884	551	469333	2	0	0	0.246071	1	0.619855	TC
Arterial embolism and thrombosis	circulatory system	0.075222	1.07812	0.024939	0.00255908	logistic	465091	1617	463474	2	0	0	0.686171	1	0.40747	TC
Complications of cardiac/vascular device, implant, and graft	injuries & poisonings	0.124897	1.13303	0.04146	0.00259154	logistic	474383	599	473784	2	0.014343	76.3812	4.23391	1	0.039624	TC
Nonrheumatic mitral valve disorders	circulatory system	0.038344	1.03909	0.012808	0.00275576	logistic	470968	6248	464720	2	0.000337	38.1638	1.61718	1	0.203486	TC
Hypertensive heart and/or renal disease	circulatory system	0.063053	1.06508	0.021101	0.00280636	logistic	429521	2275	427246	2	0	0	0.106087	1	0.744644	TC
Cholecystitis without cholelithiasis	digestive	-0.04373	0.957215	0.014841	0.0032145	logistic	474444	4607	469837	2	0.000601	40.3368	1.67607	1	0.195447	TC
Polycythemia vera	neoplasms	-0.10062	0.904278	0.034348	0.00339597	logistic	471566	854	470712	2	0	0	0.000303	1	0.986101	TC
Atopic/contact dermatitis due to other or unspecified	dermatologic	-0.02777	0.97261	0.009609	0.00384909	logistic	464990	12079	452911	2	0.000247	56.5923	2.30374	1	0.129063	TC
Anal and rectal conditions	digestive	0.019254	1.01944	0.006724	0.00419116	logistic	472736	23463	449273	2	2.67e-05	5.70704	1.06052	1	0.303096	TC
Multiple sclerosis	neurological	-0.06061	0.941191	0.022036	0.00595154	logistic	465083	2084	462999	2	0	0	0.250533	1	0.6167	TC
Malignant neoplasm of liver, primary	neoplasms	-0.10935	0.89642	0.040309	0.0066737	logistic	472920	621	472299	2	0.00015	4.33257	1.04529	1	0.306595	TC
Other specified erythematous conditions	dermatologic	-0.09407	0.910215	0.034766	0.00681176	logistic	462051	847	461204	2	0	0	0.003783	1	0.950957	TC
Hematuria	genitourinary	0.018456	1.01863	0.006822	0.00682434	logistic	466080	22964	443116	2	0.000215	52.4909	2.10486	1	0.146832	TC
Edema	symptoms	-0.02636	0.973988	0.009761	0.0069286	logistic	472883	11556	461327	2	0	0	0.008649	1	0.925905	TC
Bundle branch block	circulatory system	0.038976	1.03974	0.014438	0.00694447	logistic	450152	4891	445261	2	0	0	0.322627	1	0.570033	TC
Kidney replaced by transpant	genitourinary	0.107187	1.11314	0.03974	0.00699285	logistic	462782	637	462145	2	0.001196	19.9895	1.24984	1	0.263584	TC
Altered mental status	mental disorders	0.03385	1.03443	0.012617	0.00729729	logistic	466284	6430	459854	2	0	0	0.031776	1	0.85852	TC
LDL_cholesterol	Biomarkers & Measurements	0.511548	NA	0.191485	0.0075519	linear	408383	NA	NA	2	0.070299	95.6842	23.1706	1	1.48e-06	TC
Mean_platelet_thrombocyte_volume	Biomarkers & Measurements	-0.00455	NA	0.00171	0.00778494	linear	414386	NA	NA	2	0.053988	72.8825	3.68766	1	0.054816	TC
Spinal stenosis of lumbar region	musculoskeletal	-0.03075	0.969721	0.01168	0.0084768	logistic	458463	7612	450851	2	0	0	0.94991	1	0.329742	TC
Precordial pain	circulatory system	0.032511	1.03304	0.01235	0.00847685	logistic	455326	6677	448649	2	0.000212	5.00729	1.05271	1	0.304883	TC
Strabismus (not specified as paralytic)	sense organs	-0.05747	0.944148	0.021886	0.00863984	logistic	454691	2151	452540	2	0	0	0.095835	1	0.756886	TC
Irritable Bowel Syndrome	digestive	-0.02473	0.975571	0.009436	0.0087697	logistic	457368	11680	445688	2	0.001584	81.5943	5.43309	1	0.019759	TC
Retinal detachments and defects	sense organs	-0.05196	0.949365	0.019869	0.0089152	logistic	454333	2579	451754	2	0	0	0.127903	1	0.720616	TC
Dizziness and giddiness (Light-headedness and vertigo)	sense organs	0.021621	1.02186	0.008374	0.00982624	logistic	470908	15411	455497	2	0	0	0.001642	1	0.967681	TC
Calculus of bile duct	digestive	-0.09013	0.91381	0.035191	0.0104312	logistic	474050	815	473235	2	0	0	0.235962	1	0.627138	TC
Neurological disorders	mental disorders	0.02628	1.02663	0.010451	0.0119153	logistic	466129	9436	456693	2	0	0	0.01308	1	0.908945	TC
Thoracic or lumbosacral neuritis or radiculitis, unspecified	symptoms	-0.03526	0.965357	0.014079	0.0122684	logistic	467453	5520	461933	2	0	0	0.162199	1	0.68714	TC
Shortness of breath	respiratory	0.019446	1.01964	0.007776	0.0123977	logistic	454368	18207	436161	2	0	0	0.458371	1	0.498386	TC
Hypothyroidism NOS	endocrine/metabolic	-0.01514	0.984978	0.006061	0.0125194	logistic	473884	30323	443561	2	0	0	0.336978	1	0.561579	TC
Chronic Kidney Disease, Stage III	genitourinary	-0.02297	0.977292	0.009206	0.012595	logistic	466595	12631	453964	2	0	0	0.837657	1	0.360068	TC
Hypertensive heart disease	circulatory system	0.058173	1.0599	0.023339	0.0126838	logistic	431054	2132	428922	2	0.003471	61.3561	2.58773	1	0.107694	TC
Functional disorders of bladder	genitourinary	-0.04335	0.957573	0.017439	0.0129187	logistic	473047	3383	469664	2	0.002236	78.2349	4.59452	1	0.032074	TC
Testicular hypofunction	endocrine/metabolic	-0.04396	0.95699	0.01771	0.0130514	logistic	468134	3388	464746	2	0	0	0.180434	1	0.671	TC
Myeloproliferative disease	neoplasms	-0.0536	0.947808	0.021618	0.0131548	logistic	476354	2161	474193	2	0	0	0.042555	1	0.836566	TC
Glaucoma	sense organs	-0.02015	0.980049	0.008134	0.0132277	logistic	460226	16862	443364	2	0	0	0.021232	1	0.884148	TC
Vitamin B-complex deficiencies	endocrine/metabolic	-0.03584	0.964796	0.014481	0.0133278	logistic	463691	4997	458694	2	0	0	0.008105	1	0.928267	TC
Musculoskeletal symptoms referable to limbs	symptoms	-0.07016	0.932247	0.028486	0.0137835	logistic	472387	1240	471147	2	0	0	0.684155	1	0.408159	TC
Hypotension	circulatory system	0.020533	1.02075	0.008356	0.0140003	logistic	467670	15043	452627	2	0	0	0.010041	1	0.920183	TC
Visual field defects	sense organs	0.059478	1.06128	0.024374	0.0146771	logistic	465733	1738	463995	2	0	0	0.775082	1	0.378649	TC
Transient cerebral ischemia	circulatory system	0.030793	1.03127	0.012641	0.0148541	logistic	470191	6580	463611	2	0	0	0.054462	1	0.815474	TC
Malignant neoplasm of rectum, rectosigmoid junction, and anus	neoplasms	0.039705	1.0405	0.016485	0.0160146	logistic	455419	3726	451693	2	0	0	0.017451	1	0.894903	TC
Colon cancer	neoplasms	0.030675	1.03115	0.012808	0.0166186	logistic	456160	6250	449910	2	0	0	0.774779	1	0.378743	TC
Postmenopausal bleeding	genitourinary	-0.024	0.976291	0.010033	0.0167781	logistic	411276	10559	400717	2	0	0	0.254043	1	0.614243	TC
Paroxysmal tachycardia, unspecified	circulatory system	0.031537	1.03204	0.01357	0.0201243	logistic	450150	5520	444630	2	0	0	0.012154	1	0.912216	TC
Schizophrenia	mental disorders	0.053405	1.05486	0.023064	0.0205864	logistic	438087	1986	436101	2	0	0	0.390934	1	0.531809	TC
Neutrophill_percentage	Biomarkers & Measurements	-0.03038	NA	0.013302	0.02238	linear	411278	NA	NA	2	0	0	0.036648	1	0.848183	TC
Fracture of lower limb	injuries & poisonings	-0.02769	0.972686	0.012134	0.022471	logistic	468790	6954	461836	2	0	0	0.395593	1	0.529374	TC
Inflammation of eyelids	sense organs	-0.02793	0.972461	0.012255	0.022683	logistic	462401	7239	455162	2	0	0	0.400556	1	0.526802	TC
Pneumonia	respiratory	0.014856	1.01497	0.0066	0.0243982	logistic	465532	24758	440774	2	0	0	0.065471	1	0.798048	TC
Fracture of foot	injuries & poisonings	0.055268	1.05682	0.024586	0.0245767	logistic	469173	1692	467481	2	0	0	0.901226	1	0.342453	TC
Internal derangement of knee	injuries & poisonings	-0.01645	0.983681	0.007337	0.0249197	logistic	472825	19485	453340	2	0	0	0.013114	1	0.908828	TC
Other disorders of thyroid	endocrine/metabolic	-0.06785	0.934399	0.030535	0.0262762	logistic	466726	1089	465637	2	0	0	0.06128	1	0.804485	TC
Barrett's esophagus	digestive	-0.02612	0.97422	0.011786	0.0266871	logistic	447583	7418	440165	2	0	0	0.043436	1	0.834906	TC
Abnormality of gait	neurological	-0.03159	0.968905	0.014257	0.0267148	logistic	470483	5642	464841	2	0	0	0.058369	1	0.809092	TC
Hypopotassemia	endocrine/metabolic	0.026387	1.02674	0.011938	0.0270829	logistic	466830	7235	459595	2	0.000171	33.4082	1.50169	1	0.220412	TC
Sicca syndrome	dermatologic	-0.06952	0.932839	0.031591	0.0277531	logistic	461438	1014	460424	2	0	0	0.337131	1	0.56149	TC
Menopausal and postmenopausal disorders	genitourinary	-0.02026	0.979948	0.00926	0.0287142	logistic	411282	12506	398776	2	0.001608	30.4581	1.43798	1	0.230466	TC
Primary thrombocytopenia	hematopoietic	-0.07719	0.925712	0.035402	0.0292229	logistic	465609	803	464806	2	0	0	0.021552	1	0.883285	TC
Duodenitis	digestive	-0.02091	0.979305	0.009598	0.0293457	logistic	468741	11214	457527	2	0	0	0.291905	1	0.589002	TC
Abnormal function study of cardiovascular system	circulatory system	0.054283	1.05578	0.02499	0.029844	logistic	467003	1631	465372	2	0	0	0.151014	1	0.697569	TC
Obsessive-compulsive disorders	mental disorders	-0.08223	0.921057	0.037904	0.030044	logistic	437385	723	436662	2	0	0	0.183038	1	0.668775	TC
Disorders of magnesium metabolism	endocrine/metabolic	0.042108	1.04301	0.01941	0.0300488	logistic	474451	2699	471752	2	0	0	0.001059	1	0.974038	TC
Other venous embolism and thrombosis	circulatory system	-0.04193	0.95894	0.019351	0.0302584	logistic	455169	2843	452326	2	0.011021	89.2067	9.26501	1	0.002336	TC
Chronic venous insufficiency [CVI]	circulatory system	-0.04014	0.960657	0.018545	0.0304422	logistic	455355	3143	452212	2	0	0	0.184652	1	0.667405	TC
Diplopia and disorders of binocular vision	sense organs	-0.04591	0.955126	0.021294	0.0310797	logistic	465723	2253	463470	2	0	0	0.156973	1	0.691959	TC
Chronic fatigue syndrome	symptoms	0.058559	1.06031	0.027359	0.0323246	logistic	465409	1356	464053	2	0.00035	14.9352	1.17557	1	0.278259	TC
Vitamin D deficiency	endocrine/metabolic	0.02172	1.02196	0.010216	0.0334875	logistic	468840	10851	457989	2	0	0	0.493727	1	0.482269	TC
Cancer of tongue	neoplasms	0.080817	1.08417	0.038332	0.0350031	logistic	476815	687	476128	2	0	0	0.001034	1	0.974346	TC
Other and unspecified disorders of the nervous system	neurological	-0.0771	0.925798	0.036662	0.0354695	logistic	465025	751	464274	2	0.000552	16.522	1.19792	1	0.273738	TC
Dermatophytosis of nail	infectious diseases	-0.02463	0.975667	0.011743	0.0359328	logistic	466819	9122	457697	2	0.001793	34.6683	1.53065	1	0.216015	TC
Esophagitis, GERD and related diseases	digestive	-0.00966	0.990386	0.004607	0.0359884	logistic	446641	54900	391741	2	0.001713	72.4651	3.63175	1	0.056687	TC
Chronic bronchitis	respiratory	-0.02557	0.974754	0.012194	0.0360048	logistic	455579	6938	448641	2	0.00343	72.2631	3.60531	1	0.057595	TC
Unspecified disorder of lipoid metabolism	endocrine/metabolic	0.296518	1.34517	0.141576	0.0362231	logistic	427165	993	426172	2	0.037703	94.0023	16.6732	1	4.44e-05	TC
Pernicious anemia	hematopoietic	-0.05608	0.945464	0.0268	0.0363937	logistic	461808	1405	460403	2	0.009951	71.5969	3.52074	1	0.060605	TC
Blood in stool	digestive	0.026753	1.02711	0.012813	0.0368016	logistic	467385	6286	461099	2	0	0	0.009071	1	0.924124	TC
Hammer toe (acquired)	musculoskeletal	-0.03053	0.969935	0.014658	0.0372881	logistic	464241	4840	459401	2	0.000145	24.7531	1.32896	1	0.248991	TC
GERD	digestive	-0.01008	0.989976	0.004864	0.0383241	logistic	468793	54067	414726	2	0	0	0.036107	1	0.849294	TC
Left bundle branch block	circulatory system	0.030662	1.03114	0.014809	0.0384128	logistic	450460	4642	445818	2	0.00782	85.1295	6.72474	1	0.009508	TC
Hematemesis	digestive	0.037298	1.038	0.018035	0.0386277	logistic	465266	3103	462163	2	0	0	0.034918	1	0.851767	TC
Psoriasis vulgaris	dermatologic	0.028734	1.02915	0.0139	0.0387176	logistic	462271	5333	456938	2	0.000197	32.1271	1.47334	1	0.224819	TC
Other disorders of gallbladder	digestive	-0.03964	0.961138	0.019279	0.0397848	logistic	474106	2719	471387	2	0.006098	77.9139	4.52773	1	0.03335	TC
Emphysema	respiratory	-0.02936	0.971069	0.014408	0.0415917	logistic	456298	4935	451363	2	0	0	0.131802	1	0.716571	TC
Traumatic amputation	injuries & poisonings	-0.06607	0.936066	0.032448	0.0417347	logistic	469080	959	468121	2	0.001414	39.8959	1.66378	1	0.197094	TC
Pleurisy; pleural effusion	respiratory	0.016986	1.01713	0.008355	0.0420368	logistic	470906	15052	455854	2	0	0	0.48807	1	0.48479	TC
stress incontinence, female	genitourinary	-0.02456	0.975743	0.012109	0.0425719	logistic	413270	7084	406186	2	0.001616	43.0142	1.75482	1	0.185271	TC
Dysmenorrhea	genitourinary	-0.0483	0.952847	0.023959	0.0438066	logistic	411386	1807	409579	2	0	0	0.375916	1	0.539797	TC
Back pain	symptoms	-0.01254	0.98754	0.006223	0.0439112	logistic	470938	40101	430837	2	0	0	0.572283	1	0.449353	TC
Peritonitis and retroperitoneal infections	digestive	-0.04759	0.953526	0.023767	0.0452527	logistic	471720	1782	469938	2	0.002353	48.0958	1.92663	1	0.165128	TC
Sarcoidosis	dermatologic	-0.06257	0.939344	0.031436	0.0465342	logistic	461781	1017	460764	2	0.001499	32.9825	1.49215	1	0.221884	TC
Generalized anxiety disorder	mental disorders	-0.03308	0.967466	0.016644	0.0469008	logistic	441160	4571	436589	2	0	0	0.405582	1	0.52422	TC
Nontoxic multinodular goiter	endocrine/metabolic	-0.05043	0.950823	0.025409	0.0471877	logistic	466965	1585	465380	2	0	0	0.000662	1	0.979477	TC
Benign neoplasm of respiratory and intrathoracic organs	neoplasms	0.080236	1.08354	0.040549	0.0478483	logistic	478371	612	477759	2	0	0	0.429007	1	0.512477	TC
Palpitations	circulatory system	0.02192	1.02216	0.011123	0.0487555	logistic	452306	8360	443946	2	0.000111	25.5874	1.34386	1	0.246355	TC
Circulatory disease NEC	circulatory system	0.011512	1.01158	0.005844	0.0488561	logistic	468972	32335	436637	2	0	0	0.004522	1	0.946384	TC
Congenital deformities of feet	congenital anomalies	0.055781	1.05737	0.028363	0.0492164	logistic	475914	1283	474631	2	0	0	0.248313	1	0.618266	TC
Retention of urine	genitourinary	0.015483	1.0156	0.007914	0.0504256	logistic	463123	17086	446037	2	0	0	0.010751	1	0.917416	TC
Althete's foot	infectious diseases	-0.04186	0.959005	0.021411	0.0505873	logistic	459961	2331	457630	2	0	0	0.039664	1	0.84214	TC
Fracture of radius and ulna	injuries & poisonings	0.020577	1.02079	0.010596	0.0521464	logistic	469026	9197	459829	2	0	0	0.252033	1	0.615647	TC
Disorders of bilirubin excretion	endocrine/metabolic	-0.06277	0.939155	0.032377	0.0525143	logistic	474666	963	473703	2	0	0	0.764488	1	0.381928	TC
Cerebral artery occlusion, with cerebral infarction	circulatory system	0.022844	1.02311	0.011855	0.0539802	logistic	468899	7332	461567	2	0	0	0.896298	1	0.343776	TC
Obstructive chronic bronchitis	respiratory	-0.02165	0.978587	0.011237	0.0540758	logistic	457314	8257	449057	2	0.000434	56.441	2.29574	1	0.12973	TC
Abdominal pain	symptoms	-0.01078	0.989276	0.005606	0.0544471	logistic	470261	35459	434802	2	7.96e-05	48.9908	1.96043	1	0.161467	TC
Anal and rectal polyp	digestive	0.017319	1.01747	0.009055	0.0557778	logistic	471785	12626	459159	2	0	0	0.45946	1	0.497876	TC
Other disorders of prostate	genitourinary	0.039363	1.04015	0.020616	0.0562137	logistic	445747	2401	443346	2	0	0	0.919869	1	0.337509	TC
Epiphora	sense organs	-0.04912	0.952067	0.02585	0.0574049	logistic	453692	1513	452179	2	0	0	0.017905	1	0.893552	TC
Fasciitis	musculoskeletal	-0.02095	0.979265	0.011059	0.0581331	logistic	453399	8727	444672	2	0	0	0.009241	1	0.923418	TC
Respiratory abnormalities	respiratory	-0.05039	0.950861	0.026688	0.0590251	logistic	475929	1417	474512	2	0	0	0.058959	1	0.808149	TC
Disorders of diaphragm	respiratory	-0.08387	0.919548	0.044559	0.0597943	logistic	475570	508	475062	2	0	0	0.375886	1	0.539813	TC
Spondylosis without myelopathy	musculoskeletal	-0.02005	0.980145	0.010702	0.060939	logistic	462097	9572	452525	2	0	0	0.21897	1	0.639826	TC
Bursitis	musculoskeletal	-0.03826	0.962465	0.020424	0.0610494	logistic	450823	2489	448334	2	0	0	0.016096	1	0.899045	TC
Acquired toe deformities	musculoskeletal	-0.02109	0.979135	0.011354	0.063297	logistic	463237	7999	455238	2	0	0	0.048782	1	0.825196	TC
Develomental delays and disorders	mental disorders	0.053143	1.05458	0.028647	0.0635846	logistic	474563	1224	473339	2	0	0	0.405531	1	0.524246	TC
Symptomatic menopause	genitourinary	-0.06691	0.935283	0.036312	0.065399	logistic	411997	1067	410930	2	0	0	0.073551	1	0.786235	TC
Strabismus and other disorders of binocular eye movements	sense organs	-0.03626	0.964388	0.019713	0.0658388	logistic	453916	2615	451301	2	0.000133	8.06831	1.08776	1	0.296967	TC
Disorders of calcium/phosphorus metabolism	endocrine/metabolic	0.032508	1.03304	0.017793	0.0676959	logistic	473881	3196	470685	2	0.006334	74.6785	3.94921	1	0.046893	TC
Premature beats	circulatory system	0.041443	1.04231	0.022699	0.0678832	logistic	450679	1980	448699	2	0	0	0.244112	1	0.621252	TC
Other vitamin B12 deficiency anemia	hematopoietic	-0.05084	0.950429	0.027919	0.0685941	logistic	462671	1325	461346	2	0	0	0.137977	1	0.710301	TC
Suppurative and unspecified otitis media	sense organs	-0.03636	0.964293	0.020287	0.0730833	logistic	470603	2499	468104	2	0.001094	56.5825	2.30322	1	0.129106	TC
Other alveolar and parietoalveolar pneumonopathy	respiratory	-0.05555	0.945964	0.031014	0.07327	logistic	469915	1047	468868	2	2.82e-05	0.96953	1.00979	1	0.314953	TC
Hypertensive chronic kidney disease	circulatory system	0.028356	1.02876	0.015889	0.0743171	logistic	432520	4987	427533	2	0.000154	22.8303	1.29584	1	0.254974	TC
Dyspepsia and other specified disorders of function of stomach	digestive	0.014586	1.01469	0.008197	0.0751624	logistic	469691	15532	454159	2	0.000972	66.9374	3.02456	1	0.082012	TC
Influenza	respiratory	0.048942	1.05016	0.027596	0.0761368	logistic	462633	1326	461307	2	0	0	0.42851	1	0.512721	TC
Cerebral aneurysm	circulatory system	-0.06297	0.938973	0.035507	0.0761557	logistic	467296	799	466497	2	0.001388	26.839	1.36685	1	0.242354	TC
Paroxysmal ventricular tachycardia	circulatory system	0.036459	1.03713	0.020593	0.0766503	logistic	450711	2402	448309	2	0	0	0.494061	1	0.482121	TC
Disorders of esophageal motility	digestive	-0.04838	0.952773	0.027352	0.0769309	logistic	446044	1347	444697	2	0	0	0.068471	1	0.793576	TC
Varicose veins	circulatory system	-0.01488	0.985234	0.008446	0.0781663	logistic	453081	14592	438489	2	0	0	0.27558	1	0.599613	TC
Hallucinations	mental disorders	0.060261	1.06211	0.034248	0.0784793	logistic	465582	856	464726	2	0	0	0.450242	1	0.50222	TC
Proteinuria	endocrine/metabolic	-0.04395	0.956997	0.025037	0.0791624	logistic	475739	1643	474096	2	0	0	0.174869	1	0.675821	TC
Perforation of tympanic membrane	sense organs	-0.04691	0.954177	0.026841	0.0805407	logistic	469462	1400	468062	2	0	0	0.163046	1	0.686367	TC
Paralytic ileus	digestive	0.046229	1.04731	0.026461	0.080626	logistic	455780	1436	454344	2	0.012792	80.579	5.14907	1	0.023259	TC
Fracture of upper limb	injuries & poisonings	0.015723	1.01585	0.009067	0.0829159	logistic	468741	12642	456099	2	0	0	0.04773	1	0.827061	TC
Hyperpotassemia	endocrine/metabolic	0.026429	1.02678	0.015392	0.0859653	logistic	466219	4349	461870	2	0	0	0.497557	1	0.480575	TC
Cancer of bronchus; lung	neoplasms	-0.02348	0.976796	0.013691	0.086388	logistic	478150	5465	472685	2	0.002561	81.6322	5.44431	1	0.019632	TC
Portal hypertension	digestive	-0.04659	0.954479	0.027342	0.0883958	logistic	465747	1345	464402	2	0	0	0.040833	1	0.83986	TC
Valvular heart disease/ heart chambers	congenital anomalies	-0.06747	0.934757	0.039628	0.088651	logistic	477500	639	476861	2	0.000873	15.1609	1.1787	1	0.27762	TC
Synoviopathy	musculoskeletal	0.046341	1.04743	0.027247	0.0889904	logistic	449781	1375	448406	2	0.003104	66.1773	2.95659	1	0.085528	TC
Chronic ulcer of leg or foot	dermatologic	-0.02587	0.974464	0.015264	0.0901352	logistic	476176	4412	471764	2	0	0	0.000193	1	0.988916	TC
Other peripheral nerve disorders	neurological	0.010973	1.01103	0.006477	0.0902106	logistic	468907	26558	442349	2	0.000318	77.5219	4.44877	1	0.034926	TC
Hereditary and idiopathic peripheral neuropathy	neurological	-0.02577	0.974559	0.015214	0.0902969	logistic	473457	4760	468697	2	0	0	0.068667	1	0.793287	TC
Urticaria	dermatologic	-0.04808	0.953061	0.028398	0.0904676	logistic	458133	1272	456861	2	0	0	0.058372	1	0.809087	TC
Hallux valgus (Bunion)	musculoskeletal	-0.01731	0.982841	0.010241	0.0909999	logistic	463744	9948	453796	2	0	0	0.109995	1	0.74015	TC
Diseases of pulp and periapical tissues	digestive	-0.03153	0.968959	0.018684	0.0914589	logistic	459143	2899	456244	2	0	0	0.081883	1	0.774762	TC
Nodular lymphoma	neoplasms	0.066198	1.06844	0.039256	0.0917338	logistic	476067	658	475409	2	0	0	0.276595	1	0.598942	TC
Other immunological findings	endocrine/metabolic	-0.07401	0.928659	0.044061	0.092999	logistic	477990	518	477472	2	0	0	0.036724	1	0.848028	TC
Diseases of pancreas	digestive	-0.02383	0.976455	0.014191	0.0931507	logistic	476862	5039	471823	2	0	0	0.786541	1	0.375148	TC
Ascites (non malignant)	digestive	-0.0287	0.971708	0.01718	0.0948213	logistic	465855	3421	462434	2	0.004574	74.6583	3.94606	1	0.046981	TC
Herpes simplex	infectious diseases	-0.04245	0.958438	0.025424	0.0949838	logistic	463373	1619	461754	2	0	0	0.200943	1	0.653961	TC
Other allied disorders of spine	musculoskeletal	-0.06036	0.941424	0.036194	0.0953757	logistic	456240	766	455474	2	0	0	0.221401	1	0.637975	TC
Primary pulmonary hypertension	circulatory system	-0.05962	0.942118	0.035832	0.0961099	logistic	472979	786	472193	2	0	0	0.096997	1	0.755463	TC
Disorders of adrenal glands	endocrine/metabolic	-0.04579	0.955244	0.027542	0.0964076	logistic	470084	1333	468751	2	0	0	0.279197	1	0.597228	TC
Varicose veins of lower extremity	circulatory system	-0.01398	0.98612	0.008429	0.0972771	logistic	453810	14651	439159	2	0	0	0.258207	1	0.611354	TC
Psoriatic arthropathy	dermatologic	0.04251	1.04343	0.025641	0.0973462	logistic	460650	1540	459110	2	0	0	0.000953	1	0.975376	TC
Pituitary hypofunction	endocrine/metabolic	-0.07304	0.929567	0.044143	0.0980181	logistic	469873	515	469358	2	0	0	0.274897	1	0.600066	TC
Other nondiabetic retinopathy	sense organs	-0.03202	0.968485	0.019491	0.100402	logistic	453138	2687	450451	2	0	0	0.000267	1	0.986967	TC
Cancer of esophagus	neoplasms	-0.04094	0.959886	0.02501	0.101627	logistic	472864	1611	471253	2	0	0	0.025495	1	0.873139	TC
Cancer of mouth	neoplasms	0.048595	1.0498	0.029769	0.102591	logistic	476743	1136	475607	2	0.008659	68.0833	3.13316	1	0.076715	TC
Nonspecific findings on examination of blood	symptoms	0.063662	1.06573	0.03904	0.102953	logistic	470299	661	469638	2	0	0	0.111746	1	0.738165	TC
Disorders of conjunctiva	sense organs	-0.03776	0.962948	0.023261	0.104548	logistic	459315	1915	457400	2	0	0	0.707438	1	0.400296	TC
Cirrhosis of liver without mention of alcohol	digestive	-0.04056	0.960256	0.025034	0.105225	logistic	466892	1649	465243	2	0	0	0.013264	1	0.90831	TC
Hypovolemia	endocrine/metabolic	0.01669	1.01683	0.010325	0.106005	logistic	466547	9694	456853	2	0	0	0.059015	1	0.808059	TC
Other abnormal blood chemistry	symptoms	-0.02719	0.973174	0.016835	0.106266	logistic	472940	3716	469224	2	0.001202	61.9169	2.62584	1	0.105137	TC
Diaphragmatic hernia	digestive	-0.00812	0.991912	0.005051	0.107872	logistic	467736	44255	423481	2	0.000316	55.8756	2.26632	1	0.132213	TC
Agorophobia, social phobia, and panic disorder	mental disorders	-0.02623	0.974115	0.016318	0.108017	logistic	439503	4247	435256	2	0	0	0.618384	1	0.431648	TC
Nephrotic syndrome without mention of glomerulonephritis	genitourinary	0.046459	1.04756	0.029157	0.111061	logistic	462759	1186	461573	2	0	0	0.095841	1	0.756878	TC
Fracture of pelvis	injuries & poisonings	0.041297	1.04216	0.026085	0.113387	logistic	468408	1481	466927	2	0	0	0.679189	1	0.409866	TC
Ankylosing spondylitis	musculoskeletal	0.053935	1.05542	0.034166	0.114429	logistic	470962	862	470100	2	0	0	0.007014	1	0.933254	TC
Essential tremor	neurological	-0.03417	0.966412	0.021723	0.11577	logistic	466123	2185	463938	2	0.002443	70.6361	3.40555	1	0.064978	TC
Acquired foot deformities	musculoskeletal	-0.01321	0.986875	0.008463	0.118509	logistic	463817	14690	449127	2	0	0	0.004293	1	0.947761	TC
Otitis media	sense organs	-0.03019	0.970264	0.019392	0.119548	logistic	469734	2694	467040	2	0.000859	43.1877	1.76018	1	0.184602	TC
Peritoneal adhesions (postoperative) (postinfection)	digestive	-0.01928	0.980906	0.012419	0.12058	logistic	471716	6605	465111	2	0	0	0.002028	1	0.96408	TC
Cancer of connective tissue	neoplasms	0.062664	1.06467	0.040445	0.121296	logistic	478383	617	477766	2	0	0	0.357507	1	0.549894	TC
Disorders of the autonomic nervous system	neurological	0.058794	1.06056	0.03801	0.121914	logistic	464829	696	464133	2	0	0	0.004007	1	0.949526	TC
Nephritis and nephropathy with pathological lesion	genitourinary	0.059569	1.06138	0.038625	0.123018	logistic	462869	676	462193	2	0	0	0.906235	1	0.341115	TC
Degenerative disease of the spinal cord	neurological	-0.02808	0.972315	0.01821	0.123126	logistic	464885	3043	461842	2	0	0	0.013066	1	0.908995	TC
Ganglion and cyst of synovium, tendon, and bursa	musculoskeletal	0.022333	1.02258	0.01453	0.124275	logistic	450187	4830	445357	2	0.000644	48.2153	1.93107	1	0.164641	TC
Chronic pancreatitis	digestive	0.045565	1.04662	0.02966	0.124483	logistic	476967	1145	475822	2	0.000404	16.0162	1.19071	1	0.275187	TC
Lipoma of skin and subcutaneous tissue	neoplasms	0.01959	1.01978	0.012768	0.12497	logistic	474544	6248	468296	2	0	0	0.666074	1	0.414424	TC
Neoplasm of unspecified nature of digestive system	neoplasms	0.038746	1.03951	0.025341	0.126275	logistic	472839	1568	471271	2	0.000513	14.215	1.1657	1	0.280286	TC
Hypermetropia	sense organs	0.01867	1.01885	0.012264	0.127934	logistic	448385	8764	439621	2	0	0	0.227487	1	0.633393	TC
Flat foot	musculoskeletal	-0.03498	0.965621	0.022994	0.128151	logistic	463844	1997	461847	2	0	0	0.032155	1	0.857688	TC
Nontoxic uninodular goiter	endocrine/metabolic	-0.0331	0.967444	0.021815	0.129218	logistic	467722	2187	465535	2	0	0	0.05065	1	0.821936	TC
Other diseases of respiratory system, NEC	respiratory	0.01176	1.01183	0.007774	0.130362	logistic	474246	17419	456827	2	0.000717	38.4806	1.6255	1	0.202326	TC
Conductive hearing loss	sense organs	-0.04291	0.957999	0.028427	0.131193	logistic	441984	1265	440719	2	0	0	0.184009	1	0.66795	TC
Peptic ulcer, site unspecified	digestive	-0.03605	0.964593	0.024249	0.137106	logistic	476452	1754	474698	2	0	0	0.17741	1	0.673608	TC
Kyphoscoliosis and scoliosis	musculoskeletal	-0.03633	0.964319	0.024507	0.138186	logistic	462531	1686	460845	2	0	0	0.297692	1	0.585333	TC
Tobacco use disorder	mental disorders	0.009504	1.00955	0.006421	0.138837	logistic	465685	33030	432655	2	0.000312	79.0593	4.77539	1	0.028869	TC
Cholesteatoma	sense organs	-0.05028	0.950959	0.034056	0.139806	logistic	469323	868	468455	2	0	0	0.015154	1	0.902028	TC
Chronic tonsillitis and adenoiditis	respiratory	-0.03965	0.961128	0.026853	0.13982	logistic	450085	1397	448688	2	0	0	0.150435	1	0.69812	TC
Other conditions of brain, NOS	neurological	-0.0602	0.941573	0.040993	0.141935	logistic	464953	600	464353	2	0	0	0.072138	1	0.788249	TC
Scar conditions and fibrosis of skin	dermatologic	0.023742	1.02403	0.016314	0.145576	logistic	464629	3811	460818	2	0	0	0.707176	1	0.400383	TC
Memory loss	mental disorders	0.026195	1.02654	0.018015	0.145935	logistic	467263	3194	464069	2	0	0	0.767348	1	0.381039	TC
Acute reaction to stress	mental disorders	-0.05858	0.943104	0.040576	0.14883	logistic	437349	625	436724	2	0.000518	11.139	1.12535	1	0.288769	TC
Spinal stenosis	musculoskeletal	-0.01498	0.985134	0.010376	0.14886	logistic	458465	9645	448820	2	8.85e-05	22.5955	1.29191	1	0.255695	TC
Irregular menstrual bleeding	genitourinary	0.023514	1.02379	0.016501	0.15415	logistic	411237	3790	407447	2	0	0	0.508144	1	0.475944	TC
Renal dialysis	genitourinary	0.044981	1.04601	0.031665	0.155451	logistic	462897	1005	461892	2	0.012819	82.5212	5.72123	1	0.016761	TC
Calcaneal spur; Exostosis NOS	musculoskeletal	-0.02872	0.971686	0.020358	0.158277	logistic	450678	2500	448178	2	0	0	0.001593	1	0.96816	TC
Fever of unknown origin	symptoms	0.015922	1.01605	0.011335	0.160113	logistic	475394	7955	467439	2	0	0	0.039015	1	0.843419	TC
Herpes zoster	infectious diseases	-0.03197	0.968533	0.023013	0.164731	logistic	463221	1951	461270	2	0	0	0.008825	1	0.925155	TC
Functional digestive disorders	digestive	-0.0073	0.992729	0.005269	0.16606	logistic	455946	40236	415710	2	0	0	0.753977	1	0.38522	TC
Benign neoplasm of eye, uveal	neoplasms	0.030348	1.03081	0.022079	0.169279	logistic	476328	2174	474154	2	0	0	0.725556	1	0.394328	TC
Acute pancreatitis	digestive	-0.02231	0.977935	0.016268	0.170222	logistic	477386	3826	473560	2	0	0	0.385266	1	0.534798	TC
Esophageal bleeding (varices/hemorrhage)	digestive	0.026861	1.02723	0.019677	0.172233	logistic	446245	2607	443638	2	0.003634	71.2241	3.47513	1	0.062298	TC
Abnormal heart sounds	circulatory system	0.020948	1.02117	0.015438	0.174805	logistic	471264	4314	466950	2	0.000203	27.4065	1.37753	1	0.240522	TC
Throat pain	respiratory	0.051495	1.05284	0.0381	0.176518	logistic	450061	698	449363	2	0	0	7.37e-05	1	0.993149	TC
Other and unspecified disc disorder	musculoskeletal	-0.02686	0.973496	0.019909	0.177276	logistic	457371	2586	454785	2	0.000787	49.7223	1.98895	1	0.158451	TC
Intestinal infection due to C. difficile	infectious diseases	0.035939	1.03659	0.026683	0.17801	logistic	476480	1419	475061	2	0.005614	69.4159	3.26967	1	0.070572	TC
Pneumonitis due to inhalation of food or vomitus	respiratory	0.02768	1.02807	0.020554	0.178086	logistic	469879	2392	467487	2	0	0	0.137557	1	0.710721	TC
Raynaud's syndrome	circulatory system	-0.02634	0.974003	0.019586	0.178661	logistic	465198	2635	462563	2	0	0	0.489674	1	0.484073	TC
Keratitis	sense organs	-0.05689	0.944694	0.042325	0.178874	logistic	458376	565	457811	2	0.001578	27.1058	1.37185	1	0.241494	TC
Symptoms involving nervous and musculoskeletal systems	symptoms	0.014408	1.01451	0.010733	0.179458	logistic	476970	8998	467972	2	0.006305	85.847	7.06566	1	0.007858	TC
Calculus of kidney	genitourinary	0.014529	1.01464	0.010846	0.180358	logistic	475173	8884	466289	2	0	0	0.495709	1	0.481392	TC
Anemia of chronic disease	hematopoietic	0.031693	1.0322	0.023704	0.181222	logistic	462170	1808	460362	2	0	0	0.825659	1	0.363531	TC
Suicide or self-inflicted injury	mental disorders	0.052526	1.05393	0.039484	0.183417	logistic	437310	664	436646	2	0	0	0.145286	1	0.703082	TC
Lymphoid leukemia, chronic	neoplasms	-0.03768	0.963018	0.028482	0.185824	logistic	476289	1251	475038	2	0.00192	48.111	1.92719	1	0.165066	TC
Retinal vascular changes and abnomalities	sense organs	0.033735	1.03431	0.025539	0.186528	logistic	453355	1615	451740	2	0	0	0.035251	1	0.851071	TC
Corneal degenerations	sense organs	0.0344	1.035	0.026127	0.187961	logistic	453573	1475	452098	2	0	0	0.037436	1	0.84658	TC
Triglycerides	Biomarkers & Measurements	0.362337	NA	0.275484	0.188418	linear	408726	NA	NA	2	0.149226	98.2866	58.3651	1	2.18e-14	TC
Acute pharyngitis	respiratory	0.0243	1.0246	0.018489	0.188758	logistic	457059	3055	454004	2	0.002662	79.4342	4.86244	1	0.027448	TC
Polycythemia, secondary	hematopoietic	-0.04022	0.960583	0.030648	0.189461	logistic	468629	1075	467554	2	0	0	0.005334	1	0.941779	TC
Primary angle-closure glaucoma	sense organs	-0.02872	0.971692	0.022	0.191787	logistic	454076	2114	451962	2	0	0	0.001449	1	0.969633	TC
Acute renal failure	genitourinary	0.009714	1.00976	0.007448	0.192135	logistic	466032	19299	446733	2	0	0	0.457348	1	0.498866	TC
Malignant neoplasm of testis	neoplasms	0.014057	1.01416	0.010823	0.194	logistic	466010	8829	457181	2	0.003487	50.2196	2.00882	1	0.156387	TC
Swelling of limb	symptoms	-0.03908	0.961677	0.030133	0.194698	logistic	473189	1140	472049	2	0	0	0.416148	1	0.518866	TC
Open-angle glaucoma	sense organs	-0.01545	0.984668	0.011986	0.197402	logistic	458604	7822	450782	2	0.000339	52.2185	2.09286	1	0.147989	TC
Amblyopia	sense organs	0.028361	1.02877	0.022045	0.198262	logistic	465578	2101	463477	2	0	0	0.025822	1	0.872335	TC
Injuries to the nervous system	injuries & poisonings	0.030972	1.03146	0.024171	0.200057	logistic	477647	1732	475915	2	0	0	0.710677	1	0.399219	TC
Ileostomy status	digestive	0.024332	1.02463	0.019032	0.201076	logistic	455831	2789	453042	2	0.000805	25.5319	1.34286	1	0.246531	TC
Cough	respiratory	0.01186	1.01193	0.009287	0.201567	logistic	455017	13165	441852	2	0	0	0.152933	1	0.695748	TC
Hepatitis NOS	infectious diseases	-0.0477	0.953424	0.037352	0.201633	logistic	462400	726	461674	2	0.00159	36.0433	1.56356	1	0.211145	TC
Mycoses	infectious diseases	-0.05157	0.949736	0.040443	0.20225	logistic	457975	614	457361	2	0	0	0.062169	1	0.803099	TC
Aseptic necrosis of bone	musculoskeletal	0.052257	1.05365	0.041015	0.202626	logistic	459985	605	459380	2	0	0	0.25755	1	0.611808	TC
Polymyalgia Rheumatica	musculoskeletal	0.022178	1.02243	0.01741	0.202728	logistic	478556	3357	475199	2	0	0	0.199162	1	0.655398	TC
Respiratory failure	respiratory	0.015706	1.01583	0.012341	0.203128	logistic	470888	6727	464161	2	0.000453	46.1473	1.85692	1	0.172981	TC
Pain in joint	musculoskeletal	-0.00806	0.99197	0.006337	0.203297	logistic	469561	46605	422956	2	0	0	0.099354	1	0.752607	TC
Disorders of menstruation and other abnormal bleeding from female genital tract	genitourinary	-0.0103	0.989753	0.008118	0.204545	logistic	411357	17242	394115	2	0.007833	75.721	4.11879	1	0.042409	TC
Rupture of synovium	musculoskeletal	-0.04051	0.960299	0.032039	0.206092	logistic	449489	984	448505	2	0	0	0.135937	1	0.712354	TC
Allergy/adverse effect of penicillin	injuries & poisonings	-0.00811	0.991927	0.006413	0.20623	logistic	471490	26163	445327	2	0	0	0.75517	1	0.384844	TC
Hypoglycemia	endocrine/metabolic	-0.02367	0.976605	0.018779	0.207453	logistic	444888	2868	442020	2	0.000678	38.2112	1.61842	1	0.203313	TC
Senile cataract	sense organs	0.007758	1.00779	0.006188	0.209943	logistic	465097	38862	426235	2	0	0	0.045228	1	0.831586	TC
Atrioventricular [AV] block	circulatory system	0.016659	1.0168	0.01336	0.212424	logistic	450229	5748	444481	2	0	0	0.026517	1	0.870645	TC
Acute upper respiratory infections of multiple or unspecified sites	respiratory	0.012782	1.01286	0.010296	0.214462	logistic	462506	10619	451887	2	0.000547	70.4721	3.38663	1	0.065727	TC
Mitral valve disease	circulatory system	-0.04822	0.952921	0.038938	0.21555	logistic	469881	664	469217	2	0	0	0.063513	1	0.801028	TC
Acidosis	endocrine/metabolic	0.020639	1.02085	0.016789	0.218958	logistic	465174	3590	461584	2	0	0	0.336591	1	0.561804	TC
Secondary hypothyroidism	endocrine/metabolic	-0.0245	0.975794	0.019994	0.22036	logistic	466821	2540	464281	2	0	0	0.057946	1	0.809772	TC
Renal colic	genitourinary	0.025732	1.02607	0.021137	0.223458	logistic	471390	2253	469137	2	0	0	0.027536	1	0.868203	TC
Chronic Kidney Disease, Stage IV	genitourinary	0.027316	1.02769	0.022455	0.22382	logistic	463512	2032	461480	2	0	0	0.186219	1	0.666082	TC
Malignant neoplasm, other	neoplasms	0.011741	1.01181	0.009664	0.224399	logistic	469720	11143	458577	2	0	0	0.281974	1	0.59541	TC
Migrain with aura	neurological	-0.042	0.958865	0.0346	0.22475	logistic	463003	855	462148	2	0	0	0.01224	1	0.911906	TC
Other diseases of respiratory system, not elsewhere classified	respiratory	0.009286	1.00933	0.007652	0.224916	logistic	474311	17997	456314	2	0	0	0.199257	1	0.655322	TC
Acute posthemorrhagic anemia	hematopoietic	0.046224	1.04731	0.038125	0.225345	logistic	462007	701	461306	2	0	0	0.06535	1	0.798232	TC
Chronic kidney disease, Stage I or II	genitourinary	0.02652	1.02687	0.021891	0.225723	logistic	463519	2129	461390	2	0.000806	44.6776	1.80759	1	0.178798	TC
Osteoarthrosis, generalized	musculoskeletal	-0.01072	0.989337	0.008858	0.226198	logistic	448716	13293	435423	2	0.000632	57.6255	2.35991	1	0.124489	TC
Reflux esophagitis	digestive	-0.00945	0.990596	0.007861	0.229357	logistic	447250	16903	430347	2	0.001309	76.3552	4.22927	1	0.039733	TC
Tachycardia NOS	circulatory system	-0.01551	0.984606	0.013004	0.232868	logistic	451390	6045	445345	2	0	0	0.284568	1	0.593723	TC
Hydronephrosis	genitourinary	0.024262	1.02456	0.020384	0.233952	logistic	471910	2438	469472	2	0.001104	50.8025	2.03262	1	0.153955	TC
Balanoposthitis	genitourinary	0.046129	1.04721	0.039026	0.237194	logistic	445380	664	444716	2	0	0	0.089968	1	0.764217	TC
Gout	endocrine/metabolic	0.011988	1.01206	0.0102	0.239883	logistic	476304	10270	466034	2	0.000104	32.9166	1.49068	1	0.222111	TC
Alcoholism	mental disorders	0.010911	1.01097	0.009287	0.240058	logistic	452279	13421	438858	2	0	0	0.615301	1	0.432799	TC
Atrial fibrillation	circulatory system	0.011284	1.01135	0.009611	0.240384	logistic	457665	12960	444705	2	0	0	0.005842	1	0.939077	TC
Ectropion or entropion	sense organs	-0.02264	0.977615	0.01946	0.244669	logistic	458929	2710	456219	2	0.000133	11.7984	1.13377	1	0.286974	TC
Disorders of external ear	sense organs	-0.03405	0.966522	0.029306	0.24527	logistic	463630	1176	462454	2	0.002423	55.4361	2.24397	1	0.134136	TC
Abnormal results of function study of liver	digestive	0.011446	1.01151	0.009872	0.246271	logistic	469139	10698	458441	2	0	0	0.023574	1	0.877973	TC
Streptococcus infection	infectious diseases	-0.02054	0.979669	0.017741	0.246948	logistic	471378	3207	468171	2	0	0	0.047151	1	0.828097	TC
Dependence on respirator [Ventilator] or supplemental oxygen	respiratory	-0.02702	0.973341	0.023438	0.248976	logistic	470337	1848	468489	2	0.000266	17.9386	1.2186	1	0.269636	TC
Diseases of esophagus	digestive	-0.00522	0.994797	0.004534	0.249891	logistic	446069	57273	388796	2	0.005235	70.8815	3.43425	1	0.063858	TC
Osteoarthrosis, localized, secondary	musculoskeletal	0.021837	1.02208	0.019021	0.25096	logistic	448110	2807	445303	2	0	0	0.945572	1	0.330849	TC
Umbilical hernia	digestive	0.013468	1.01356	0.011795	0.253523	logistic	467308	7368	459940	2	0	0	0.696937	1	0.403815	TC
Diverticulosis	digestive	0.015777	1.0159	0.013907	0.256588	logistic	461610	6162	455448	2	0	0	0.011487	1	0.914649	TC
Thrombocytopenia	hematopoietic	-0.01634	0.983789	0.014408	0.25664	logistic	467188	4950	462238	2	0.00194	80.6412	5.16562	1	0.023038	TC
Viral warts & HPV	infectious diseases	-0.01761	0.982543	0.015562	0.257787	logistic	464779	4325	460454	2	0	0	0.496119	1	0.481211	TC
Cataract	sense organs	-0.00552	0.994495	0.004917	0.261648	logistic	455224	53628	401596	2	0	0	0.023257	1	0.878792	TC
Endocarditis	circulatory system	0.03026	1.03072	0.02705	0.263295	logistic	474159	1382	472777	2	0	0	0.045846	1	0.830457	TC
Duodenal ulcer	digestive	0.017434	1.01759	0.015592	0.263504	logistic	475481	4172	471309	2	0	0	0.011019	1	0.916398	TC
Multiple myeloma	neoplasms	0.031442	1.03194	0.028152	0.264053	logistic	476110	1270	474840	2	0	0	0.07249	1	0.787745	TC
Facial nerve disorders [CN7]	neurological	0.026087	1.02643	0.023413	0.265188	logistic	459045	1846	457199	2	0	0	0.007704	1	0.930056	TC
Gastric ulcer	digestive	-0.01364	0.986451	0.012308	0.267709	logistic	475655	6738	468917	2	0.001966	57.5891	2.35789	1	0.124651	TC
Retinal hemorrhage/ischemia	sense organs	-0.04238	0.958505	0.038356	0.269182	logistic	452600	698	451902	2	0.000586	13.3302	1.1538	1	0.282754	TC
Disorders of sacrum	musculoskeletal	-0.03659	0.964072	0.033159	0.269825	logistic	456542	921	455621	2	0.003265	59.4301	2.46488	1	0.116417	TC
Acne	dermatologic	-0.0372	0.963486	0.033778	0.270804	logistic	464234	924	463310	2	0	0	0.000262	1	0.987091	TC
Pathologic fracture	musculoskeletal	0.028454	1.02886	0.025842	0.270868	logistic	471994	1510	470484	2	0	0	0.016839	1	0.896753	TC
Peripheral enthesopathies and allied syndromes	musculoskeletal	-0.00715	0.992878	0.006495	0.271135	logistic	455263	25579	429684	2	0	0	0.359801	1	0.548617	TC
Tension headache	mental disorders	0.039764	1.04056	0.036157	0.271438	logistic	437121	775	436346	2	0.004947	60.9742	2.56241	1	0.109432	TC
Gastritis and duodenitis, NOS	digestive	0.026175	1.02652	0.023805	0.271509	logistic	469408	1810	467598	2	0	0	0.661443	1	0.416051	TC
Pain, swelling or discharge of eye	sense organs	-0.0417	0.959157	0.038051	0.273119	logistic	453906	698	453208	2	0	0	0.767086	1	0.38112	TC
Ulcerative colitis	digestive	-0.01603	0.984101	0.014628	0.273258	logistic	456198	4747	451451	2	0	0	0.453954	1	0.500463	TC
Benign neoplasm of brain, cranial nerves, meninges	neoplasms	-0.02767	0.972708	0.02528	0.273709	logistic	474635	1581	473054	2	0	0	0.000368	1	0.984704	TC
Open wounds of head; neck; and trunk	injuries & poisonings	0.025856	1.02619	0.023644	0.27415	logistic	469333	1814	467519	2	0	0	1.17e-06	1	0.999136	TC
Prurigo and Lichen	dermatologic	0.024221	1.02452	0.0222	0.275255	logistic	462379	2073	460306	2	0	0	0.227418	1	0.633445	TC
Lipoma	neoplasms	0.011619	1.01169	0.010767	0.280516	logistic	474699	8831	465868	2	0	0	0.266309	1	0.605819	TC
Diseases of nail, NOS	dermatologic	-0.01663	0.983508	0.015413	0.280617	logistic	469292	4656	464636	2	0	0	0.15953	1	0.689589	TC
Torsion dystonia	neurological	-0.04176	0.959102	0.038818	0.282051	logistic	464935	669	464266	2	0	0	0.615712	1	0.432645	TC
Secondary malignancy of lymph nodes	neoplasms	0.010742	1.0108	0.010041	0.284733	logistic	469742	10207	459535	2	0	0	0.647722	1	0.420928	TC
HDL_cholesterol	Biomarkers & Measurements	0.328977	NA	0.308001	0.285474	linear	376040	NA	NA	2	0.187178	98.6376	73.3982	1	1.06e-17	TC
Diseases of hard tissues of teeth	digestive	-0.01387	0.986227	0.013047	0.287814	logistic	460335	6016	454319	2	0	0	0.256474	1	0.612553	TC
Bacterial infection NOS	infectious diseases	-0.00868	0.991362	0.008163	0.287892	logistic	471760	15693	456067	2	0	0	0.265985	1	0.606038	TC
Cancer of brain	neoplasms	0.034319	1.03492	0.032351	0.288769	logistic	474429	959	473470	2	0	0	0.624706	1	0.429304	TC
Swelling, mass, or lump in head and neck [Space-occupying lesion, intracranial NOS]	mental disorders	0.021979	1.02222	0.020728	0.288979	logistic	476513	2376	474137	2	0	0	0.006705	1	0.934741	TC
Urinary calculus	genitourinary	0.010825	1.01088	0.010274	0.292025	logistic	472054	9739	462315	2	0	0	0.058223	1	0.809327	TC
Abnormal serum enzyme levels	digestive	0.033225	1.03378	0.031714	0.294804	logistic	466078	1014	465064	2	0.000853	29.3392	1.41521	1	0.234193	TC
Paralytic strabismus	sense organs	-0.03852	0.962211	0.03697	0.297415	logistic	453747	740	453007	2	0	0	0.582156	1	0.445468	TC
Other diseases of the teeth and supporting structures	digestive	-0.01017	0.989886	0.009811	0.300125	logistic	466648	11682	454966	2	0	0	0.473672	1	0.491303	TC
Hydrocele	genitourinary	-0.02023	0.979978	0.019622	0.30266	logistic	439047	2652	436395	2	0	0	0.018674	1	0.891304	TC
Gram positive septicemia	infectious diseases	0.031162	1.03165	0.030319	0.30405	logistic	471280	1094	470186	2	0	0	0.176781	1	0.674155	TC
Other specified diseases of hair and hair follicles	dermatologic	-0.0304	0.970057	0.029591	0.304268	logistic	466209	1182	465027	2	0	0	0.042025	1	0.837573	TC
Acute sinusitis	respiratory	-0.01872	0.981453	0.018301	0.306332	logistic	458347	3254	455093	2	0	0	0.231779	1	0.630208	TC
Joint effusions	musculoskeletal	0.017876	1.01804	0.017589	0.309472	logistic	467345	3287	464058	2	0	0	0.018813	1	0.890904	TC
Diseases of lips	digestive	0.030545	1.03102	0.030145	0.310923	logistic	472585	1107	471478	2	0	0	0.316725	1	0.573583	TC
Chemotherapy	neoplasms	0.008865	1.0089	0.008775	0.312396	logistic	470519	13486	457033	2	0	0	0.040307	1	0.840882	TC
Uterine leiomyoma	neoplasms	0.009659	1.00971	0.009562	0.312435	logistic	413257	11632	401625	2	0.01	81.2249	5.32619	1	0.021007	TC
Cancer of bladder	neoplasms	-0.01517	0.984943	0.015075	0.314231	logistic	476795	4488	472307	2	0.011738	92.3588	13.0869	1	0.000297	TC
Epistaxis or throat hemorrhage	respiratory	0.014604	1.01471	0.014529	0.314812	logistic	450849	4840	446009	2	0	0	0.04083	1	0.839866	TC
First degree AV block	circulatory system	0.016932	1.01708	0.01693	0.317256	logistic	450597	3569	447028	2	0	0	0.212137	1	0.645097	TC
Neoplasm of uncertain behavior	neoplasms	0.016817	1.01696	0.016817	0.317317	logistic	470885	3650	467235	2	0	0	0.705346	1	0.400993	TC
Acute bronchitis and bronchiolitis	respiratory	0.015772	1.0159	0.015904	0.32133	logistic	466265	4340	461925	2	0	0	0.136421	1	0.711865	TC
Pyelonephritis	genitourinary	0.019205	1.01939	0.019374	0.321541	logistic	463021	2693	460328	2	0	0	0.010095	1	0.919968	TC
Myopia	sense organs	-0.01059	0.989461	0.010716	0.322839	logistic	447620	10270	437350	2	0	0	0.042411	1	0.836838	TC
Optic neuritis/neuropathy	sense organs	-0.03694	0.963737	0.037422	0.323631	logistic	453952	724	453228	2	0.003409	53.5549	2.15308	1	0.142284	TC
Nevus, non-neoplastic	neoplasms	0.021579	1.02181	0.02217	0.330391	logistic	463248	2097	461151	2	0	0	0.889086	1	0.345725	TC
Iron deficiency anemia secondary to blood loss (chronic)	hematopoietic	0.029447	1.02988	0.03047	0.333844	logistic	462029	1092	460937	2	0	0	0.261956	1	0.608779	TC
Anorexia	endocrine/metabolic	-0.02173	0.978502	0.022517	0.334463	logistic	461254	1989	459265	2	0	0	0.533473	1	0.46515	TC
Effects radiation NOS	injuries & poisonings	0.010146	1.0102	0.010533	0.335412	logistic	476345	9265	467080	2	0.007041	83.2935	5.9857	1	0.014422	TC
Sacroiliitis NEC	musculoskeletal	-0.04004	0.960753	0.041625	0.336117	logistic	471208	592	470616	2	0	0	0.217434	1	0.641002	TC
Contusion	injuries & poisonings	-0.01388	0.986218	0.01447	0.33754	logistic	473020	4923	468097	2	0.001346	76.0155	4.16936	1	0.041161	TC
Urinary incontinence	genitourinary	-0.01098	0.989076	0.011541	0.341259	logistic	463489	7926	455563	2	0	0	0.184103	1	0.667871	TC
Chronic periodontitis	digestive	-0.01911	0.981068	0.020288	0.346136	logistic	459737	2487	457250	2	2.24e-05	2.61794	1.02688	1	0.310892	TC
Other dyschromia	dermatologic	-0.01916	0.981024	0.020348	0.346425	logistic	462773	2482	460291	2	0	0	6.26e-08	1	0.9998	TC
Uveitis, noninfectious or NOS	sense organs	-0.02902	0.971398	0.030935	0.348202	logistic	458680	1063	457617	2	0	0	0.223601	1	0.63631	TC
Somatoform disorder	mental disorders	-0.02667	0.973683	0.028441	0.348384	logistic	438051	1332	436719	2	0	0	0.001186	1	0.972528	TC
Anisometropia	sense organs	0.032243	1.03277	0.034528	0.350397	logistic	465169	856	464313	2	0	0	3.22e-05	1	0.995472	TC
Open wound of foot except toe(s) alone	injuries & poisonings	-0.04156	0.959289	0.044539	0.35073	logistic	468907	508	468399	2	0.003816	49.0149	1.96136	1	0.161368	TC
Impacted cerumen	sense organs	-0.01245	0.98763	0.013346	0.350996	logistic	469403	6678	462725	2	0.000399	27.1353	1.37241	1	0.241399	TC
Irregular menstrual cycle	genitourinary	-0.02152	0.97871	0.023106	0.351672	logistic	411322	1914	409408	2	0	0	0.008345	1	0.927212	TC
Other non-epithelial cancer of skin	neoplasms	0.007651	1.00768	0.00824	0.353154	logistic	468125	16331	451794	2	0	0	0.153157	1	0.695537	TC
Other upper respiratory disease	respiratory	-0.01626	0.983874	0.017534	0.353829	logistic	451579	3368	448211	2	0	0	0.024063	1	0.876726	TC
Fracture of clavicle or scapula	injuries & poisonings	0.021208	1.02144	0.022959	0.35561	logistic	468607	1913	466694	2	0.015769	89.1197	9.1909	1	0.002432	TC
Disturbance of salivary secretion	digestive	-0.03657	0.964089	0.039628	0.356066	logistic	472968	651	472317	2	0	0	0.150943	1	0.697636	TC
Symptoms affecting skin	dermatologic	-0.01951	0.980678	0.021253	0.358594	logistic	457335	2233	455102	2	0.000696	17.6943	1.21498	1	0.270348	TC
Chronic airway obstruction	respiratory	-0.00553	0.994489	0.006029	0.359335	logistic	466418	31859	434559	2	0.000329	79.5023	4.8786	1	0.027192	TC
Gingival and periodontal diseases	digestive	-0.01017	0.989884	0.01118	0.363114	logistic	465259	8941	456318	2	0	0	0.339409	1	0.56017	TC
Cholangitis	digestive	-0.02455	0.975745	0.027021	0.363498	logistic	473878	1375	472503	2	0.001143	18.7228	1.23036	1	0.267338	TC
Ulcer of esophagus	digestive	-0.01098	0.989082	0.01214	0.365854	logistic	446146	6932	439214	2	0	0	0.525271	1	0.468602	TC
Acute appendicitis	digestive	-0.02789	0.9725	0.030862	0.366231	logistic	478422	1058	477364	2	0.000237	10.0166	1.11132	1	0.291796	TC
Other hypertrophic and atrophic conditions of skin	dermatologic	0.009678	1.00972	0.010747	0.367857	logistic	465629	8901	456728	2	0	0	0.687944	1	0.406864	TC
Rosacea	dermatologic	-0.01851	0.981656	0.020576	0.368231	logistic	463411	2477	460934	2	0	0	0.534947	1	0.464535	TC
Peyronie's disease	genitourinary	-0.02477	0.975529	0.027555	0.368588	logistic	438597	1327	437270	2	0	0	0.510981	1	0.474715	TC
Cancer, suspected or other	neoplasms	0.008674	1.00871	0.009744	0.373345	logistic	469465	10959	458506	2	0.001519	51.0326	2.04217	1	0.152991	TC
Other disorders of bladder	genitourinary	-0.00739	0.992636	0.008375	0.377496	logistic	472324	14968	457356	2	0.000983	57.3248	2.34328	1	0.125824	TC
Gouty arthropathy	endocrine/metabolic	-0.02394	0.97634	0.027162	0.378037	logistic	472712	1409	471303	2	0	0	0.021369	1	0.883779	TC
Generalized convulsive epilepsy	neurological	-0.03096	0.969518	0.035474	0.38285	logistic	464853	798	464055	2	0	0	0.023811	1	0.877366	TC
Anxiety disorders	mental disorders	0.006793	1.00682	0.007795	0.383548	logistic	437644	17239	420405	2	0	0	0.011872	1	0.913234	TC
Dislocation	injuries & poisonings	-0.01752	0.982637	0.020173	0.385239	logistic	471880	2545	469335	2	0	0	0.062289	1	0.802915	TC
Cancer of prostate	neoplasms	0.006502	1.00652	0.007493	0.385544	logistic	450304	20225	430079	2	0	0	0.094373	1	0.75869	TC
Mean_corpuscular_haemoglobin_concentration	Biomarkers & Measurements	0.001431	NA	0.001666	0.390458	linear	415859	NA	NA	2	0.049599	70.4919	3.3889	1	0.065637	TC
Carcinoma in situ of skin	neoplasms	0.019313	1.0195	0.022497	0.390627	logistic	462232	2010	460222	2	0	0	0.081573	1	0.775177	TC
Calculus of lower urinary tract	genitourinary	-0.02124	0.97898	0.024881	0.393215	logistic	471573	1632	469941	2	0	0	0.053559	1	0.816982	TC
Eustachian tube disorders	sense organs	0.026675	1.02703	0.031243	0.393227	logistic	469930	1055	468875	2	0.000252	9.23364	1.10173	1	0.293887	TC
Paralysis/spasm of vocal cords or larynx	respiratory	0.034785	1.0354	0.04091	0.395166	logistic	449979	602	449377	2	0	0	0.087976	1	0.766766	TC
Diseases of spleen	hematopoietic	0.024754	1.02506	0.029161	0.395947	logistic	468774	1182	467592	2	0	0	0.806554	1	0.369141	TC
Benign neoplasm of pituitary gland and craniopharyngeal duct (pouch)	neoplasms	-0.03124	0.969239	0.036889	0.396999	logistic	477284	744	476540	2	0	0	0.017243	1	0.895527	TC
Chronic hepatitis	infectious diseases	-0.03255	0.967977	0.03848	0.397658	logistic	462348	686	461662	2	0.008742	73.8813	3.82868	1	0.050383	TC
Thyroid cancer	neoplasms	0.029417	1.02985	0.035056	0.401384	logistic	477326	825	476501	2	0.00507	65.3208	2.88357	1	0.089487	TC
Dental caries	digestive	-0.00758	0.992454	0.009078	0.404029	logistic	468436	14022	454414	2	0	0	0.249737	1	0.61726	TC
Bronchopneumonia and lung abscess	respiratory	-0.02826	0.972137	0.033945	0.405139	logistic	462433	872	461561	2	0	0	0.3309	1	0.56513	TC
Nonspecific elevation of levels of transaminase or lactic acid dehydrogenase [LDH]	digestive	-0.03119	0.969294	0.037594	0.406784	logistic	466062	720	465342	2	0	0	0.035862	1	0.849801	TC
Pericarditis	circulatory system	-0.01577	0.984356	0.019073	0.40839	logistic	474105	2777	471328	2	0	0	0.015892	1	0.899681	TC
Other symptoms involving abdomen and pelvis	digestive	-0.0155	0.984617	0.018781	0.409126	logistic	465462	2870	462592	2	0.000954	37.3204	1.59542	1	0.206554	TC
Unequal leg length (acquired)	musculoskeletal	-0.03138	0.969104	0.038043	0.409405	logistic	462731	709	462022	2	0.002905	35.5945	1.55266	1	0.212743	TC
Incisional hernia	digestive	-0.02048	0.979723	0.024869	0.410102	logistic	466135	1646	464489	2	0.001101	45.7793	1.84431	1	0.174446	TC
Gram negative septicemia	infectious diseases	-0.03301	0.967525	0.040217	0.411698	logistic	471292	621	470671	2	0	0	0.192312	1	0.660999	TC
[truncated: 1,867 more rows]
