# Supplementary material for: Implicating genes, pleiotropy, and sexual dimorphism at blood lipid loci through multi-ancestry meta-analysis
Source: Genome Biol. 2022 Dec 27;23:268. doi: 10.1186/s13059-022-02837-1 (PMC9793579; doi:10.1186/s13059-022-02837-1)
Supplement: Supplementary file 17 — Additional file 17: Table S9. PheWAS UKB-MVP meta-analysis results for each index lipid variant at Bonferroni threshold for multiple testing p<=3.5e-8) [file 13059_2022_2837_MOESM17_ESM.xlsx]

## Sheet: Sheet1
Table S9. PheWAS UKB-MVP meta-analysis results for each index lipid variant at Bonferroni threshold for multiple testing p<=3.5e-8)
phenotype	group	rsid_dbSNP150	chr	pos	refAllele	beta	OR	SE	p	type	n_total	n_cases	n_controls	k_studies	tau2	I2.percent	Q	Q.p	Gene_Prioritization	lipid_trait
Mean_platelet_thrombocyte_volume	Blood Biomarkers	rs7916868	10	64988931	A	0.106354	1.11222	0.00241685	<1.0E-314	linear	532510	NA	NA	2	0	0	0.920331	0.337388	JMJD1C	HDL
Mean_platelet_thrombocyte_volume	Blood Biomarkers	rs10761750	10	65128619	G	0.113104	1.11975	0.00241717	<1.0E-314	linear	533481	NA	NA	2	0.00197949	22.4849	1.29007	0.256035	JMJD1C	LDL
Mean_platelet_thrombocyte_volume	Blood Biomarkers	rs7924036	10	65191645	T	-0.105821	0.899585	0.00241423	<1.0E-314	linear	533415	NA	NA	2	0.000887773	11.1828	1.12591	0.28865	JMJD1C	logTG
Haemoglobin_concentration	Blood Biomarkers	rs17476364	10	71094504	C	0.133964	1.14335	0.00352979	<1.0E-314	linear	550072	NA	NA	2	0	0	0.0280479	0.866996	HK1	LDL,TC,nonHDL
Total_bilirubin	Blood Biomarkers	rs73079476	12	21343833	A	-0.619981	0.537955	0.0134756	<1.0E-314	linear	538701	NA	NA	2	0.131793	96.3853	27.6647	1.44269e-07	na	logTG
Monocyte_count	Blood Biomarkers	rs76428106	13	28604007	C	0.0896455	1.09379	0.00237209	<1.0E-314	linear	510219	NA	NA	2	0.110944	28.0359	1.38958	0.238476	na	TC
HDL_cholesterol	Blood Biomarkers	rs261291	15	58680178	T	-0.0389261	0.961822	0.000859481	<1.0E-314	linear	508631	NA	NA	2	0.000745039	48.897	1.95683	0.161852	na	HDL
HDL_cholesterol	Blood Biomarkers	rs35980001	15	58722590	G	-0.0462464	0.954807	0.00101452	<1.0E-314	linear	503274	NA	NA	2	0.00255509	70.4631	3.3856	0.0657683	LIPC	LDL
HDL_cholesterol	Blood Biomarkers	rs1077835	15	58723426	A	-0.0462909	0.954764	0.000995074	<1.0E-314	linear	508221	NA	NA	2	0.00208157	66.6695	3.00025	0.0832515	LIPC	logTG,nonHDL
HDL_cholesterol	Blood Biomarkers	rs2070895	15	58723939	G	-0.0465375	0.954529	0.000994159	<1.0E-314	linear	508861	NA	NA	2	0.00190541	64.7033	2.83313	0.0923385	LIPC	TC
BMI	Physical Measures	rs56094641	16	53806453	G	0.380241	1.46264	0.0094045	<1.0E-314	linear	563464	NA	NA	2	0.00520099	95.4022	21.7493	3.10695e-06	na	HDL
BMI	Physical Measures	rs62033400	16	53811788	A	-0.371246	0.689874	0.00943892	<1.0E-314	linear	563057	NA	NA	2	0.00454493	94.7549	19.0656	1.26302e-05	na	logTG
HDL_cholesterol	Blood Biomarkers	rs247617	16	56990716	A	0.0889755	1.09305	0.000868179	<1.0E-314	linear	509923	NA	NA	2	0.0115608	93.6183	15.6699	7.5415e-05	CETP	LDL,logTG
HDL_cholesterol	Blood Biomarkers	rs183130	16	56991363	C	-0.0891387	0.914719	0.000867891	<1.0E-314	linear	509537	NA	NA	2	0	0	0.282131	0.595308	CETP	HDL,TC,nonHDL
Hyperlipidemia	endocrine/metabolic	rs7412	19	45412079	T	-0.358271	0.698884	0.00827483	<1.0E-314	logistic	712628	280273	432355	2	0.00381236	96.361	27.48	1.58728e-07	APOE	LDL,TC,nonHDL
Mean_corpuscular_volume	Blood Biomarkers	rs855791	22	37462936	G	0.539619	1.71535	0.00984143	<1.0E-314	linear	542507	NA	NA	2	0.0770137	91.7842	12.1717	0.0004852	na	LDL
Haemoglobin_concentration	Blood Biomarkers	rs855791	22	37462936	G	0.0884741	1.09251	0.00224028	<1.0E-314	linear	542683	NA	NA	2	0	0	0.346601	0.556044	na	LDL
Red_blood_cell_erythrocyte_distribution_width	Blood Biomarkers	rs855791	22	37462936	G	-0.0852257	0.918305	0.00216326	<1.0E-314	linear	525464	NA	NA	2	0.0405476	85.938	7.11136	0.00765972	na	LDL
Mean_corpuscular_haemoglobin	Blood Biomarkers	rs855791	22	37462936	G	0.24341	1.27559	0.00409412	<1.0E-314	linear	542529	NA	NA	2	0	0	0.883464	0.347255	na	LDL
Direct_bilirubin	Blood Biomarkers	rs62192912	2	234144942	C	0.11028	1.11659	0.00226213	<1.0E-314	linear	413836	NA	NA	2	0	0	0.978342	0.322608	na	TC
Direct_bilirubin	Blood Biomarkers	rs17868301	2	234512095	C	0.230231	1.25889	0.00406588	<1.0E-314	linear	423849	NA	NA	2	0.0241862	74.3977	3.9059	0.0481168	na	logTG
Direct_bilirubin	Blood Biomarkers	rs35203651	2	234679549	T	0.205786	1.22849	0.00327428	<1.0E-314	linear	424024	NA	NA	2	0.0210469	86.5171	7.4168	0.00646175	na	LDL,TC,nonHDL
Mean_corpuscular_haemoglobin	Blood Biomarkers	rs7776054	6	135418916	G	0.315432	1.37085	0.00457469	<1.0E-314	linear	549525	NA	NA	2	0.0226017	71.9202	3.56128	0.0591423	na	LDL,TC,nonHDL
Red_blood_cell_erythrocyte_count	Blood Biomarkers	rs7776054	6	135418916	G	-0.0601325	0.94164	0.000893569	<1.0E-314	linear	549396	NA	NA	2	0	0	0.83098	0.361989	na	LDL,TC,nonHDL
Mean_corpuscular_volume	Blood Biomarkers	rs7776054	6	135418916	G	0.719146	2.05268	0.0110126	<1.0E-314	linear	549503	NA	NA	2	0.220706	96.1361	25.8807	3.63182e-07	na	LDL,TC,nonHDL
Mean_corpuscular_haemoglobin	Blood Biomarkers	rs7758845	6	135428537	C	0.30656	1.35874	0.00451291	<1.0E-314	linear	549534	NA	NA	2	0.0509103	85.2492	6.77932	0.00922202	na	HDL
Red_blood_cell_erythrocyte_count	Blood Biomarkers	rs7758845	6	135428537	C	-0.0586333	0.943053	0.000880936	<1.0E-314	linear	549405	NA	NA	2	0	0	0.0263214	0.871118	na	HDL
Disorders of mineral metabolism	endocrine/metabolic	rs80215559	6	25918225	C	1.0786	2.94057	0.0258594	<1.0E-314	logistic	712628	5074	707554	2	0.236232	93.5445	15.4908	8.29091e-05	na	LDL,TC,nonHDL
Mean_corpuscular_volume	Blood Biomarkers	rs80215559	6	25918225	C	1.05027	2.85842	0.0181759	<1.0E-314	linear	550793	NA	NA	2	0	0	0.338029	0.560969	na	LDL,TC,nonHDL
Mean_corpuscular_haemoglobin	Blood Biomarkers	rs80215559	6	25918225	C	0.481938	1.61921	0.00754835	<1.0E-314	linear	550815	NA	NA	2	0.220216	88.316	8.55872	0.00343872	na	LDL,TC,nonHDL
Haemoglobin_concentration	Blood Biomarkers	rs80215559	6	25918225	C	0.164964	1.17935	0.00413494	<1.0E-314	linear	550969	NA	NA	2	0.472145	93.2462	14.8066	0.00011912	na	LDL,TC,nonHDL
Mean_corpuscular_haemoglobin	Blood Biomarkers	rs35657082	6	27067657	T	0.292147	1.3393	0.00732719	<1.0E-314	linear	543574	NA	NA	2	0	0	0.883999	0.347109	na	LDL,TC,nonHDL
Celiac disease	digestive	rs1233393	6	29549653	G	1.02977	2.80043	0.0263228	<1.0E-314	logistic	712468	3756	708712	2	0.0103437	85.0167	6.6741	0.00978241	na	logTG
Celiac disease	digestive	rs2517601	6	30074072	C	1.05268	2.86531	0.0257997	<1.0E-314	logistic	707417	3713	703704	2	0.0155743	90.0325	10.0326	0.00153796	na	logTG
Celiac disease	digestive	rs1264377	6	30764907	A	1.01388	2.75626	0.024311	<1.0E-314	logistic	712628	3758	708870	2	0.0365554	96.1469	25.9531	3.49808e-07	na	HDL
Celiac disease	digestive	rs1264347	6	30798697	T	1.22566	3.40643	0.0251648	<1.0E-314	logistic	695156	3531	691625	2	0.0263409	94.3238	17.6174	2.70102e-05	na	logTG
Triglycerides	Blood Biomarkers	rs28601761	8	126500031	G	-0.0951534	0.909233	0.00234733	<1.0E-314	linear	524682	NA	NA	2	0.0100773	92.9313	14.1469	0.000169078	na	LDL,TC,logTG,nonHDL
Triglycerides	Blood Biomarkers	rs117199990	8	19820916	T	-0.189371	0.82748	0.00374078	<1.0E-314	linear	542385	NA	NA	2	0.00545419	74.1187	3.86379	0.0493387	LPL	logTG
Triglycerides	Blood Biomarkers	rs3208305	8	19823648	A	0.117026	1.12415	0.00250418	<1.0E-314	linear	542059	NA	NA	2	0.00404639	82.6023	5.74789	0.0165085	LPL	HDL
Triglycerides	Blood Biomarkers	rs10096633	8	19830921	T	-0.170843	0.842954	0.00343341	<1.0E-314	linear	542544	NA	NA	2	0.00367967	70.4636	3.38565	0.0657662	LPL	nonHDL
Polycythemia vera	neoplasms	rs77375493	9	5073770	T	4.8342	125.738	0.117895	<1.0E-314	logistic	712119	2793	709326	2	0	0	0.00600682	0.938223	JAK2	HDL,TC
Celiac disease	digestive	rs2524143	6	31263510	T	0.877155	2.40405	0.023492	3.89795e-305	logistic	711244	3752	707492	2	0.0258149	95.1004	20.41	6.25034e-06	APOM	TC
Mean_corpuscular_volume	Blood Biomarkers	rs17585887	6	139835498	T	0.367704	1.44441	0.00985925	1.95539e-304	linear	550755	NA	NA	2	0.00199838	21.5866	1.27529	0.258776	CITED2	HDL,logTG
Haematocrit_percentage	Blood Biomarkers	rs17476364	10	71094504	C	0.386331	1.47157	0.0103753	1.81961e-303	linear	550078	NA	NA	2	0.0192018	45.8749	1.84757	0.174066	HK1	LDL,TC,nonHDL
Triglycerides	Blood Biomarkers	rs2980888	8	126507308	T	0.0916857	1.09602	0.00246952	1.03469e-301	linear	542226	NA	NA	2	0.0109214	92.6347	13.5772	0.000228952	TRIB1	HDL
Direct_bilirubin	Blood Biomarkers	rs73079476	12	21343833	A	-0.103776	0.901427	0.00280005	1.14126e-300	linear	422770	NA	NA	2	0	0	0.50538	0.477146	na	logTG
Triglycerides	Blood Biomarkers	rs3812316	7	73020337	G	-0.123717	0.88363	0.0033725	1.3183e-294	linear	542544	NA	NA	2	0.000308709	16.0153	1.19069	0.27519	MLXIPL	logTG
Mean_corpuscular_volume	Blood Biomarkers	rs35657082	6	27067657	T	0.639887	1.89627	0.0176465	6.5801e-288	linear	543552	NA	NA	2	0	0	0.300537	0.583546	na	LDL,TC,nonHDL
Triglycerides	Blood Biomarkers	rs55747707	7	73037366	G	0.101796	1.10716	0.00281901	1.54343e-285	linear	540631	NA	NA	2	0.00398518	77.1539	4.37711	0.0364246	MLXIPL	HDL
Triglycerides	Blood Biomarkers	rs483082	19	45416178	G	-0.0945802	0.909755	0.00266455	5.7087e-276	linear	540152	NA	NA	2	0.00998254	90.3851	10.4005	0.00125978	APOE	logTG
Celiac disease	digestive	rs13201681	6	28394680	T	0.964088	2.62239	0.0275277	1.02467e-268	logistic	712587	3757	708830	2	0.0187344	90.1605	10.1632	0.00143274	TRIM27	logTG
Eosinophill_count	Blood Biomarkers	rs3184504	12	111884608	T	0.01058	1.01064	0.000305061	1.49157e-263	linear	531040	NA	NA	2	0.0525523	92.4216	13.1955	0.000280629	ALDH2	HDL
Eosinophill_count	Blood Biomarkers	rs653178	12	112007756	C	0.0105422	1.0106	0.000305051	1.05411e-261	linear	531040	NA	NA	2	0.0529673	92.4827	13.3026	0.000265043	ALDH2	LDL,TC,nonHDL
Mean_corpuscular_volume	Blood Biomarkers	rs2982521	6	139835329	T	-0.343763	0.709097	0.0100405	6.64241e-257	linear	550728	NA	NA	2	0.196285	96.325	27.2107	1.82443e-07	na	TC,nonHDL
Mean_corpuscular_volume	Blood Biomarkers	rs635769	6	139831981	C	-0.342213	0.710197	0.0100417	1.50893e-254	linear	550583	NA	NA	2	0.193385	96.2606	26.7422	2.32493e-07	na	LDL
Monocyte_percentage	Blood Biomarkers	rs76428106	13	28604007	C	0.986024	2.68056	0.02896	4.37247e-254	linear	527366	NA	NA	2	1.6363	85.1064	6.7143	0.00956431	na	TC
Triglycerides	Blood Biomarkers	rs636523	1	62920008	G	-0.079607	0.923479	0.00236839	1.1088e-247	linear	541846	NA	NA	2	0.00328817	77.7231	4.48896	0.0341145	ANGPTL3	LDL,logTG,nonHDL
Triglycerides	Blood Biomarkers	rs3850634	1	63050598	G	-0.079428	0.923645	0.00236532	3.26039e-247	linear	542403	NA	NA	2	0.0034437	80.1227	5.03086	0.0248995	ANGPTL3	HDL
Triglycerides	Blood Biomarkers	rs995000	1	63107526	T	-0.0793688	0.923699	0.00236574	9.24914e-247	linear	542383	NA	NA	2	0.00285768	77.5535	4.45504	0.0347984	ANGPTL3	TC
Myeloproliferative disease	neoplasms	rs77375493	9	5073770	T	3.90477	49.6384	0.118034	5.45539e-240	logistic	712119	5473	706646	2	0	0	0.0141486	0.905317	JAK2	HDL,TC
Red_blood_cell_erythrocyte_distribution_width	Blood Biomarkers	rs80215559	6	25918225	C	-0.129014	0.878961	0.00399526	9.10995e-229	linear	533750	NA	NA	2	0.601028	95.5467	22.4551	2.15119e-06	na	LDL,TC,nonHDL
Coronary atherosclerosis	circulatory system	rs10455872	6	161010118	A	-0.287338	0.750258	0.00897148	4.45034e-225	logistic	712628	123318	589310	2	0.00324724	94.9154	19.6671	9.21748e-06	PLG	LDL,nonHDL
Coronary atherosclerosis	circulatory system	rs55730499	6	161005610	C	-0.288525	0.749368	0.00903661	1.07767e-223	logistic	712194	123287	588907	2	0.00311841	94.6802	18.7977	1.45346e-05	IGF2R	TC
LDL_cor	Blood Biomarkers	rs58542926	19	19379549	T	-0.114883	0.89147	0.00365682	1.2202e-216	linear	494153	NA	NA	2	0.507878	92.7331	13.7611	0.000207591	na	LDL,TC,logTG,nonHDL
Senile dementia	mental disorders	rs429358	19	45411941	C	0.877609	2.40514	0.0279695	4.11751e-216	logistic	712628	3328	709300	2	0.0568712	96.6858	30.1727	3.95224e-08	APOE	HDL
Hyperlipidemia	endocrine/metabolic	rs429358	19	45411941	C	0.198172	1.21917	0.00632809	2.80356e-215	logistic	712628	280273	432355	2	0.000984382	92.4715	13.2828	0.000267855	APOE	HDL
Mean_corpuscular_haemoglobin	Blood Biomarkers	rs3118362	6	28785085	C	0.213816	1.2384	0.00684006	1.66365e-214	linear	550815	NA	NA	2	0	0	0.0329235	0.856016	TRIM27	LDL,TC,nonHDL
HDL_cholesterol	Blood Biomarkers	rs77960347	18	47109955	A	-0.111424	0.894559	0.00356754	3.81456e-214	linear	509923	NA	NA	2	0	0	0.0276704	0.867886	LIPG	LDL,TC,nonHDL
Hypercholesterolemia	endocrine/metabolic	rs7412	19	45412079	T	-0.287906	0.749832	0.00923937	3.62455e-213	logistic	712628	116844	595784	2	0.00042149	71.0009	3.44839	0.0633136	APOE	LDL,TC,nonHDL
Red_blood_cell_erythrocyte_distribution_width	Blood Biomarkers	rs7734927	5	127453735	T	-0.0769201	0.925964	0.00247669	8.99168e-212	linear	533131	NA	NA	2	0	0	0.0236834	0.877693	SLC12A2	logTG
Red_blood_cell_erythrocyte_distribution_width	Blood Biomarkers	rs17764730	5	127357526	C	0.0769439	1.07998	0.00247813	1.17267e-211	linear	530727	NA	NA	2	0	0	0.0992361	0.752748	na	HDL
Red_blood_cell_erythrocyte_distribution_width	Blood Biomarkers	rs7776054	6	135418916	G	-0.0752578	0.927504	0.00242522	2.03593e-211	linear	532460	NA	NA	2	0	0	0.137885	0.710392	na	LDL,TC,nonHDL
Coronary atherosclerosis	circulatory system	rs10757273	9	22090301	A	0.160383	1.17396	0.0052219	3.76235e-207	logistic	686968	121305	565663	2	0.0010631	94.3779	17.787	2.47063e-05	na	TC
Haematocrit_percentage	Blood Biomarkers	rs7776054	6	135418916	G	-0.2258	0.797878	0.00738111	1.58418e-205	linear	549685	NA	NA	2	0.0471534	82.5612	5.73435	0.0166362	na	LDL,TC,nonHDL
Mean_corpuscular_haemoglobin	Blood Biomarkers	rs181058325	6	25314597	G	0.239448	1.27055	0.00785396	3.81378e-204	linear	547019	NA	NA	2	0.0133735	29.5133	1.41871	0.233616	na	LDL,TC,nonHDL
Haematocrit_percentage	Blood Biomarkers	rs7758845	6	135428537	C	-0.219826	0.802658	0.00727703	1.84797e-200	linear	549694	NA	NA	2	0.0136264	57.8163	2.37058	0.123641	na	HDL
Red_blood_cell_erythrocyte_distribution_width	Blood Biomarkers	rs7758845	6	135428537	C	-0.072036	0.930497	0.00239184	2.86699e-199	linear	532469	NA	NA	2	0	0	0.134186	0.714131	na	HDL
Mean_corpuscular_haemoglobin	Blood Biomarkers	rs17585887	6	139835498	T	0.122322	1.13012	0.00410278	2.54213e-195	linear	550777	NA	NA	2	0	0	0.732856	0.391959	CITED2	HDL,logTG
LDL_cor	Blood Biomarkers	rs964184	11	116648917	G	0.0847474	1.08844	0.0028474	1.17518e-194	linear	494153	NA	NA	2	0.113758	84.3	6.36943	0.0116103	APOA1	HDL,LDL,TC,logTG,nonHDL
Celiac disease	digestive	rs1321505	6	28052823	C	0.782733	2.18744	0.0263485	6.25856e-194	logistic	712623	3758	708865	2	0.0211217	92.1547	12.7465	0.000356678	ZKSCAN4	HDL
HDL_cholesterol	Blood Biomarkers	rs2156552	18	47181668	A	-0.0318966	0.968607	0.00107499	1.78433e-193	linear	509923	NA	NA	2	0.000174831	12.3957	1.1415	0.285336	na	HDL
Mean_corpuscular_haemoglobin_concentration	Blood Biomarkers	rs80215559	6	25918225	C	0.127738	1.13626	0.00441739	7.28934e-184	linear	548236	NA	NA	2	0.436719	93.9512	16.5322	4.78317e-05	na	LDL,TC,nonHDL
HDL_cholesterol	Blood Biomarkers	rs2740488	9	107661742	C	-0.0268815	0.973477	0.00093638	3.04402e-181	linear	508168	NA	NA	2	0	0	0.0895513	0.764748	ABCA1	HDL,TC,nonHDL
Hyperlipidemia	endocrine/metabolic	rs73015024	19	11197598	T	-0.199496	0.819143	0.00699695	8.34954e-179	logistic	712293	280230	432063	2	0.000151374	60.1268	2.50795	0.113273	LDLR	LDL,TC,nonHDL
Celiac disease	digestive	rs4947249	6	31302029	G	0.665726	1.9459	0.0235919	3.47398e-175	logistic	701088	3693	697395	2	0.032599	96.1572	26.023	3.37369e-07	APOM	HDL
Mean_corpuscular_volume	Blood Biomarkers	rs181058325	6	25314597	G	0.530568	1.6999	0.0188922	1.53576e-173	linear	546997	NA	NA	2	0	0	0.00330562	0.954151	na	LDL,TC,nonHDL
Mean_corpuscular_volume	Blood Biomarkers	rs3118362	6	28785085	C	0.461112	1.58584	0.0164611	1.15266e-172	linear	550793	NA	NA	2	0	0	0.798148	0.371648	TRIM27	LDL,TC,nonHDL
Mean_corpuscular_haemoglobin	Blood Biomarkers	rs2982521	6	139835329	T	-0.116819	0.889746	0.00417777	4.71261e-172	linear	550750	NA	NA	2	0.0726711	90.7009	10.7537	0.00104069	na	TC,nonHDL
Mean_corpuscular_haemoglobin	Blood Biomarkers	rs635769	6	139831981	C	-0.116431	0.890091	0.00417807	6.6579e-171	linear	550605	NA	NA	2	0.0704235	90.4052	10.4223	0.00124504	na	LDL
Haematocrit_percentage	Blood Biomarkers	rs855791	22	37462936	G	0.183666	1.20161	0.00659078	6.68161e-171	linear	542689	NA	NA	2	0	0	0.00194421	0.96483	na	LDL
LDL_cor	Blood Biomarkers	rs2980888	8	126507308	T	0.0587521	1.06051	0.00210955	1.06227e-170	linear	493834	NA	NA	2	0.096364	88.1925	8.46917	0.00361217	TRIB1	HDL
Other chronic ischemic heart disease, unspecified	circulatory system	rs1537373	9	22103341	G	0.152251	1.16445	0.00550359	1.89818e-168	logistic	710910	88588	622322	2	0	0	0.412455	0.520726	na	LDL
HDL_cholesterol	Blood Biomarkers	rs1883025	9	107664301	T	-0.0260432	0.974293	0.000946237	9.3494e-167	linear	509923	NA	NA	2	0	0	0.172124	0.678231	ABCA1	LDL
Eosinophill_percentage	Blood Biomarkers	rs653178	12	112007756	C	0.113496	1.12019	0.0041246	1.1081e-166	linear	541036	NA	NA	2	0.0206061	80.7283	5.18896	0.0227308	ALDH2	LDL,TC,nonHDL
Eosinophill_percentage	Blood Biomarkers	rs3184504	12	111884608	T	0.113449	1.12014	0.00412479	1.56117e-166	linear	541036	NA	NA	2	0.0223584	81.9547	5.54162	0.0185694	ALDH2	HDL
Haemoglobin_concentration	Blood Biomarkers	rs3184504	12	111884608	T	0.0605788	1.06245	0.00220655	6.20578e-166	linear	550969	NA	NA	2	0.0615116	88.5976	8.77006	0.00306216	ALDH2	HDL
Haemoglobin_concentration	Blood Biomarkers	rs653178	12	112007756	C	0.0603775	1.06224	0.00220646	7.3655e-165	linear	550969	NA	NA	2	0.0581277	88.0218	8.34847	0.00386012	ALDH2	LDL,TC,nonHDL
HDL_cholesterol	Blood Biomarkers	rs4846913	1	230294715	C	-0.0230531	0.977211	0.000842754	9.54693e-165	linear	509744	NA	NA	2	0.000834582	53.7022	2.15993	0.141651	GALNT2	HDL,logTG
Other chronic ischemic heart disease, unspecified	circulatory system	rs1333047	9	22124504	T	0.149088	1.16078	0.00550586	1.78603e-161	logistic	711668	88632	623036	2	0	0	0.0248127	0.874835	na	nonHDL
Hyperlipidemia	endocrine/metabolic	rs11591147	1	55505647	T	-0.475027	0.621868	0.0175962	1.64936e-160	logistic	712628	280273	432355	2	0.00945111	93.474	15.3234	9.05861e-05	PCSK9	LDL,TC,nonHDL
Mean_corpuscular_haemoglobin_concentration	Blood Biomarkers	rs7776054	6	135418916	G	0.072221	1.07489	0.00267774	3.24513e-160	linear	546946	NA	NA	2	0	0	0.0508568	0.821579	na	LDL,TC,nonHDL
Haematocrit_percentage	Blood Biomarkers	rs80215559	6	25918225	C	0.327105	1.38695	0.0121676	3.44639e-159	linear	550975	NA	NA	2	0.322034	90.7322	10.79	0.0010205	na	LDL,TC,nonHDL
Haemoglobin_concentration	Blood Biomarkers	rs2519093	9	136141870	C	0.0763704	1.07936	0.00284367	7.11668e-159	linear	550674	NA	NA	2	0.0140837	52.6952	2.11395	0.145962	na	HDL,TC,nonHDL
Haemoglobin_concentration	Blood Biomarkers	rs507666	9	136149399	G	0.0759876	1.07895	0.00284162	1.57214e-157	linear	550969	NA	NA	2	0.0132931	51.2953	2.05319	0.151888	na	LDL
Hypothyroidism NOS	endocrine/metabolic	rs4592135	9	100640410	G	-0.173198	0.840971	0.00648546	4.06108e-157	logistic	706570	65724	640846	2	0.000378525	80.7858	5.20448	0.0225288	na	TC
HDL_cholesterol	Blood Biomarkers	rs116843064	19	8429323	G	-0.0791542	0.923897	0.00298669	9.12071e-155	linear	509923	NA	NA	2	0.00366149	29.6893	1.42226	0.233032	na	HDL,logTG,nonHDL
Obesity	endocrine/metabolic	rs56094641	16	53806453	G	0.122243	1.13003	0.00465554	5.85752e-152	logistic	712424	153665	558759	2	6.28897e-06	9.76988	1.10828	0.292457	na	HDL
Albumin	Blood Biomarkers	rs58895965	19	35551428	C	-0.208487	0.811811	0.00796342	4.41743e-151	linear	505169	NA	NA	2	0.0232899	79.9779	4.99449	0.0254282	na	logTG
Mean_corpuscular_haemoglobin_concentration	Blood Biomarkers	rs7758845	6	135428537	C	0.0689164	1.07135	0.00264429	9.75475e-150	linear	546955	NA	NA	2	0	0	0.86594	0.352082	na	HDL
HDL_cholesterol	Blood Biomarkers	rs174564	11	61588305	A	0.0223715	1.02262	0.000862876	3.33121e-148	linear	509283	NA	NA	2	0	0	0.267181	0.605229	na	HDL,LDL,TC,logTG,nonHDL
Obesity	endocrine/metabolic	rs62033400	16	53811788	A	-0.120234	0.886713	0.00466174	1.10189e-146	logistic	712006	153633	558373	2	1.5294e-05	20.7456	1.26176	0.261318	na	logTG
Haematocrit_percentage	Blood Biomarkers	rs3184504	12	111884608	T	0.166953	1.1817	0.00648522	3.80844e-146	linear	550975	NA	NA	2	0.0298128	79.6457	4.91296	0.0266559	ALDH2	HDL
Mean_platelet_thrombocyte_volume	Blood Biomarkers	rs55801554	5	158622532	C	-0.0724987	0.930067	0.0028168	4.39556e-146	linear	531588	NA	NA	2	0	0	0.918431	0.337887	na	HDL
Other chronic ischemic heart disease, unspecified	circulatory system	rs10455872	6	161010118	A	-0.252591	0.776785	0.00983657	2.01654e-145	logistic	712628	88686	623942	2	0.000632192	74.8944	3.98318	0.0459568	PLG	LDL,nonHDL
Haematocrit_percentage	Blood Biomarkers	rs653178	12	112007756	C	0.166325	1.18096	0.00648495	4.47741e-145	linear	550975	NA	NA	2	0.0273528	78.2274	4.59294	0.032104	ALDH2	LDL,TC,nonHDL
Mean_corpuscular_haemoglobin_concentration	Blood Biomarkers	rs855791	22	37462936	G	0.0612907	1.06321	0.00239795	4.29194e-144	linear	539950	NA	NA	2	0	0	0.201506	0.653508	na	LDL
Other chronic ischemic heart disease, unspecified	circulatory system	rs55730499	6	161005610	C	-0.253145	0.776355	0.00991093	6.73918e-144	logistic	712194	88661	623533	2	0.000576033	72.9637	3.69873	0.0544538	IGF2R	TC
Albumin	Blood Biomarkers	rs1260326	2	27730940	C	-0.157973	0.853873	0.0061985	2.84499e-143	linear	505330	NA	NA	2	0.0241716	88.2182	8.48767	0.00357562	na	HDL,LDL,TC,logTG,nonHDL
Albumin	Blood Biomarkers	rs77542162	17	67081278	A	0.513591	1.67128	0.0202069	1.65238e-142	linear	505330	NA	NA	2	0.0480893	53.1326	2.13368	0.144094	ABCA5	LDL,TC,logTG,nonHDL
Other chronic ischemic heart disease, unspecified	circulatory system	rs10757273	9	22090301	A	0.145751	1.15691	0.00576348	4.24163e-141	logistic	686968	87112	599856	2	7.79313e-05	50.3639	2.01466	0.155786	na	TC
Triglycerides	Blood Biomarkers	rs116843064	19	8429323	G	0.206199	1.229	0.00822202	8.45579e-139	linear	542544	NA	NA	2	0.119419	93.0737	14.4376	0.000144879	na	HDL,logTG,nonHDL
HDL_cholesterol	Blood Biomarkers	rs72836561	17	41926126	T	-0.0581357	0.943522	0.00233445	6.84338e-137	linear	509923	NA	NA	2	0	0	0.165547	0.6841	na	HDL,LDL,TC,logTG
Haematocrit_percentage	Blood Biomarkers	rs2519093	9	136141870	C	0.206322	1.22915	0.00835755	1.48065e-134	linear	550680	NA	NA	2	0.0545242	81.7522	5.48012	0.0192339	na	HDL,TC,nonHDL
Haematocrit_percentage	Blood Biomarkers	rs507666	9	136149399	G	0.205304	1.2279	0.00835146	1.91869e-133	linear	550975	NA	NA	2	0.0534675	81.4839	5.4007	0.0201287	na	LDL
Red_blood_cell_erythrocyte_count	Blood Biomarkers	rs2519093	9	136141870	C	0.0249594	1.02527	0.00101641	3.68143e-133	linear	550391	NA	NA	2	0.00309326	22.5493	1.29114	0.255837	na	HDL,TC,nonHDL
Red_blood_cell_erythrocyte_count	Blood Biomarkers	rs507666	9	136149399	G	0.0249003	1.02521	0.00101564	9.76892e-133	linear	550686	NA	NA	2	0.00278562	20.8002	1.26263	0.261154	na	LDL
Alcohol-related disorders	mental disorders	rs1229984	4	100239319	T	-0.587087	0.555944	0.0241849	3.60219e-130	logistic	712628	53470	659158	2	0.0439951	91.4782	11.7346	0.000613494	MTTP	nonHDL
Monocyte_percentage	Blood Biomarkers	rs876038	7	50308527	C	0.154518	1.1671	0.00637465	8.5482e-130	linear	530272	NA	NA	2	0.0174086	72.3097	3.61137	0.0573857	IKZF1	TC
Monocyte_percentage	Blood Biomarkers	rs876039	7	50308811	G	0.154523	1.1671	0.006375	8.64512e-130	linear	530239	NA	NA	2	0.0173852	72.283	3.6079	0.0575057	na	HDL
Haemoglobin_concentration	Blood Biomarkers	rs35657082	6	27067657	T	0.0971634	1.10204	0.0040096	1.00652e-129	linear	543728	NA	NA	2	0.0526677	64.2238	2.79516	0.0945495	na	LDL,TC,nonHDL
Mean_corpuscular_volume	Blood Biomarkers	rs4946955	6	109639710	G	-0.258254	0.772399	0.0106917	6.67895e-129	linear	539952	NA	NA	2	0.0630738	88.6636	8.82113	0.00297762	na	HDL
HDL_cholesterol	Blood Biomarkers	rs6073958	20	44551855	T	0.0249053	1.02522	0.00103258	1.56442e-128	linear	509440	NA	NA	2	0	0	0.262014	0.60874	PLTP	HDL,logTG,nonHDL
Alcoholism	mental disorders	rs1229984	4	100239319	T	-0.57712	0.561513	0.0239559	3.10898e-128	logistic	712628	53260	659368	2	0.0179605	78.5455	4.66104	0.0308546	MTTP	nonHDL
Celiac disease	digestive	rs2248162	6	29915061	T	0.560311	1.75122	0.0232843	5.96868e-128	logistic	712438	3758	708680	2	0.0187313	93.563	15.5352	8.0984e-05	GABBR1	HDL
Albumin	Blood Biomarkers	rs1688040	19	35553830	G	-0.290383	0.747977	0.0120865	1.51266e-127	linear	505300	NA	NA	2	0.103572	88.6087	8.77864	0.00304778	HPN	TC
Hyperlipidemia	endocrine/metabolic	rs28601761	8	126500031	G	-0.112191	0.893873	0.00468086	5.97865e-127	logistic	693871	277791	416080	2	0.00077077	94.5848	18.4665	1.7292e-05	na	LDL,TC,logTG,nonHDL
Triglycerides	Blood Biomarkers	rs58542926	19	19379549	T	-0.102244	0.902809	0.00428633	9.29681e-126	linear	542544	NA	NA	2	0	0	0.15105	0.697534	na	LDL,TC,logTG,nonHDL
Hypercholesterolemia	endocrine/metabolic	rs7528419	1	109817192	G	-0.137457	0.871571	0.00576693	1.43224e-125	logistic	712628	116844	595784	2	0	0	0.0172271	0.895576	na	logTG
Albumin	Blood Biomarkers	rs10469298	19	50024391	A	0.186642	1.2052	0.00784658	4.62282e-125	linear	504704	NA	NA	2	0.0441333	87.9509	8.29936	0.0039659	na	HDL
Hypothyroidism NOS	endocrine/metabolic	rs3184504	12	111884608	T	0.141013	1.15144	0.00593019	5.53547e-125	logistic	712628	66030	646598	2	0.00160011	95.4344	21.9029	2.86801e-06	ALDH2	HDL
LDL_cor	Blood Biomarkers	rs3850634	1	63050598	G	-0.0478749	0.953253	0.00202011	3.67518e-124	linear	494012	NA	NA	2	0.00618758	32.4332	1.48002	0.223772	ANGPTL3	HDL
Disorders of mineral metabolism	endocrine/metabolic	rs35657082	6	27067657	T	0.678424	1.97077	0.0286403	4.82908e-124	logistic	705146	4900	700246	2	0.0440865	74.9447	3.99117	0.0457392	na	LDL,TC,nonHDL
White_blood_cell_leukocyte_count	Blood Biomarkers	rs622871	6	31878495	A	-0.118482	0.888268	0.00500732	8.93231e-124	linear	532540	NA	NA	2	0	0	0.669913	0.413082	APOM	logTG
LDL_cor	Blood Biomarkers	rs34042070	16	72101525	C	-0.0591532	0.942562	0.00250018	9.39964e-124	linear	489498	NA	NA	2	0.468913	96.6	29.4114	5.85313e-08	HP	nonHDL
LDL_cor	Blood Biomarkers	rs995000	1	63107526	T	-0.0477862	0.953338	0.00202059	1.1911e-123	linear	493992	NA	NA	2	0.00369026	22.8237	1.29573	0.254994	ANGPTL3	TC
White_blood_cell_leukocyte_count	Blood Biomarkers	rs3184504	12	111884608	T	0.109025	1.11519	0.00461186	1.48755e-123	linear	540877	NA	NA	2	0.0327705	82.5218	5.72141	0.0167593	ALDH2	HDL
White_blood_cell_leukocyte_count	Blood Biomarkers	rs2524143	6	31263510	T	-0.118655	0.888114	0.00502193	2.01468e-123	linear	539531	NA	NA	2	0	0	0.0692723	0.792399	APOM	TC
LDL_cor	Blood Biomarkers	rs636523	1	62920008	G	-0.0477767	0.953347	0.00202251	2.26509e-123	linear	493458	NA	NA	2	0.00588023	29.2573	1.41357	0.234464	ANGPTL3	LDL,logTG,nonHDL
Mean_platelet_thrombocyte_volume	Blood Biomarkers	rs12048743	1	205114873	C	-0.0576969	0.943936	0.00244277	2.43222e-123	linear	532619	NA	NA	2	0.0120063	63.5508	2.74354	0.0976481	na	nonHDL
LDL_cor	Blood Biomarkers	rs1260326	2	27730940	C	-0.0466193	0.954451	0.00197745	6.8751e-123	linear	494153	NA	NA	2	0.266758	96.1235	25.7963	3.7941e-07	na	HDL,LDL,TC,logTG,nonHDL
Hypothyroidism NOS	endocrine/metabolic	rs653178	12	112007756	C	0.139057	1.14919	0.00592917	1.23228e-121	logistic	712628	66030	646598	2	0.00153106	95.2392	21.0047	4.58169e-06	ALDH2	LDL,TC,nonHDL
LDL_cor	Blood Biomarkers	rs676210	2	21231524	G	0.0561368	1.05774	0.00239414	1.39829e-121	linear	494153	NA	NA	2	0.103374	86.8245	7.58986	0.00586975	APOB	HDL,logTG
HDL_cholesterol	Blood Biomarkers	rs4846923	1	230307222	G	0.0214392	1.02167	0.000916702	5.75455e-121	linear	500384	NA	NA	2	0.0113075	92.9521	14.1886	0.000165366	GALNT2	nonHDL
Triglycerides	Blood Biomarkers	rs676210	2	21231524	G	0.0654358	1.06762	0.00280448	2.07239e-120	linear	542544	NA	NA	2	0.010041	90.6283	10.6704	0.00108862	APOB	HDL,logTG
LDL_cor	Blood Biomarkers	rs2000999	16	72108093	G	-0.0574319	0.944186	0.00246908	1.11451e-119	linear	494153	NA	NA	2	0.464555	96.6253	29.632	5.22344e-08	na	logTG
White_blood_cell_leukocyte_count	Blood Biomarkers	rs653178	12	112007756	C	0.107187	1.11314	0.00461175	1.71126e-119	linear	540877	NA	NA	2	0.0301801	81.3167	5.35239	0.0206939	ALDH2	LDL,TC,nonHDL
Type 2 diabetes	endocrine/metabolic	rs56094641	16	53806453	G	0.110197	1.1165	0.00474827	3.80044e-119	logistic	712424	136881	575543	2	0.000132125	70.3541	3.37314	0.0662671	na	HDL
Mean_corpuscular_haemoglobin	Blood Biomarkers	rs4946955	6	109639710	G	-0.102913	0.902206	0.00445039	2.63007e-118	linear	539974	NA	NA	2	0.0175742	68.6626	3.19107	0.0740414	na	HDL
HDL_cholesterol	Blood Biomarkers	rs676210	2	21231524	G	-0.023475	0.976798	0.00102037	4.0224e-117	linear	509923	NA	NA	2	0	0	0.496469	0.481056	APOB	HDL,logTG
HDL_cholesterol	Blood Biomarkers	rs4841133	8	9183664	A	-0.0326905	0.967838	0.00142556	2.24237e-116	linear	509829	NA	NA	2	0	0	0.0719084	0.788578	TNKS	nonHDL
White_blood_cell_leukocyte_count	Blood Biomarkers	rs3128759	6	31885930	C	-0.108299	0.897359	0.00472795	4.03169e-116	linear	539327	NA	NA	2	0	0	0.997287	0.317968	APOM	LDL,TC,nonHDL
Triglycerides	Blood Biomarkers	rs174564	11	61588305	A	-0.0542948	0.947153	0.00237479	1.08496e-115	linear	541836	NA	NA	2	0.000488224	38.326	1.62143	0.202893	na	HDL,LDL,TC,logTG,nonHDL
Polycythemia, secondary	hematopoietic	rs77375493	9	5073770	T	3.15204	23.3836	0.138032	2.03736e-115	logistic	712119	4279	707840	2	0	0	0.00457824	0.946054	JAK2	HDL,TC
Type 2 diabetes	endocrine/metabolic	rs62033400	16	53811788	A	-0.108487	0.89719	0.00475499	3.22229e-115	logistic	712006	136840	575166	2	8.24741e-05	59.5591	2.47274	0.115836	na	logTG
Myocardial infarction	circulatory system	rs1333047	9	22124504	T	0.157121	1.17014	0.00692014	4.01469e-114	logistic	711668	48688	662980	2	0.000373542	77.8961	4.52408	0.033421	na	nonHDL
HDL_cholesterol	Blood Biomarkers	rs4841132	8	9183596	A	-0.0323169	0.9682	0.00142831	2.40788e-113	linear	509923	NA	NA	2	0	0	0.0558459	0.813186	TNKS	HDL,LDL,TC
Senile dementia	mental disorders	rs483082	19	45416178	G	-0.595843	0.551098	0.0265105	7.173e-112	logistic	710112	3312	706800	2	0.0420278	96.1408	25.9118	3.57374e-07	APOE	logTG
Myocardial infarction	circulatory system	rs1537373	9	22103341	G	0.15523	1.16793	0.00691816	1.67333e-111	logistic	710910	48658	662252	2	0.000312957	74.676	3.94883	0.046904	na	LDL
Mean_platelet_thrombocyte_volume	Blood Biomarkers	rs11240358	1	205070573	G	-0.0553539	0.94615	0.00247598	1.04592e-110	linear	532799	NA	NA	2	0.0214112	75.0472	4.00756	0.0452966	na	logTG
Hyperlipidemia	endocrine/metabolic	rs10455872	6	161010118	A	-0.188337	0.828335	0.008454	6.05537e-110	logistic	712628	280273	432355	2	0.00047785	76.8868	4.32653	0.0375227	PLG	LDL,nonHDL
Hyperlipidemia	endocrine/metabolic	rs55730499	6	161005610	C	-0.188475	0.828221	0.00849613	4.94427e-109	logistic	712194	280213	431981	2	0.000363291	71.4208	3.49905	0.061404	IGF2R	TC
Mean_platelet_thrombocyte_volume	Blood Biomarkers	rs1667583	12	122370206	C	0.0811789	1.08456	0.00366333	8.38295e-109	linear	533226	NA	NA	2	0.00406316	20.7842	1.26237	0.261202	MLXIP	TC
BMI	Physical Measures	rs6567160	18	57829135	C	0.243665	1.27592	0.0109998	1.00145e-108	linear	563346	NA	NA	2	0	0	0.759155	0.383593	na	HDL
Mean_platelet_thrombocyte_volume	Blood Biomarkers	rs2247139	12	122380274	G	0.0810956	1.08447	0.00366139	1.0704e-108	linear	533467	NA	NA	2	0.00256011	14.3295	1.16726	0.279964	na	LDL
LDL_cor	Blood Biomarkers	rs1883711	20	39179822	G	-0.127074	0.880668	0.00575129	3.5409e-108	linear	490916	NA	NA	2	0.899825	84.3795	6.40186	0.0114001	TOP1	LDL,TC,logTG,nonHDL
Triglycerides	Blood Biomarkers	rs72836561	17	41926126	T	0.142055	1.15264	0.00643132	4.12437e-108	linear	542544	NA	NA	2	0.0451644	88.6904	8.84206	0.00294367	na	HDL,LDL,TC,logTG
Albumin	Blood Biomarkers	rs11078597	17	1618363	T	-0.171454	0.842439	0.00777002	6.69102e-108	linear	505330	NA	NA	2	0	0	0.314012	0.575229	SERPINF2	logTG
Calcium	Blood Biomarkers	rs68028452	3	122285218	CT	-0.00531044	0.994704	0.000241513	3.73387e-107	linear	369124	NA	NA	2	0.000769284	9.22112	1.10158	0.29392	na	LDL,TC,nonHDL
Myocardial infarction	circulatory system	rs10455872	6	161010118	A	-0.264465	0.767617	0.0120383	5.76088e-107	logistic	712628	48726	663902	2	0.00223361	87.955	8.3022	0.0039597	PLG	LDL,nonHDL
Myocardial infarction	circulatory system	rs55730499	6	161005610	C	-0.264552	0.76755	0.0121283	1.7553e-105	logistic	712194	48706	663488	2	0.00223423	87.867	8.24197	0.00409326	IGF2R	TC
Mean_corpuscular_volume	Blood Biomarkers	rs17476364	10	71094504	C	0.339464	1.4042	0.0155627	1.75937e-105	linear	549896	NA	NA	2	0.00900803	30.8749	1.44665	0.229066	HK1	LDL,TC,nonHDL
Neutrophill_count	Blood Biomarkers	rs622871	6	31878495	A	-0.0741267	0.928554	0.00342626	8.4392e-104	linear	512567	NA	NA	2	0	0	0.108105	0.742311	APOM	logTG
LDL_cor	Blood Biomarkers	rs7255743	19	46018119	A	-0.17297	0.841163	0.00801619	2.91822e-103	linear	491772	NA	NA	2	3.0467	95.046	20.1856	7.02791e-06	na	TC,nonHDL
Disorders of mineral metabolism	endocrine/metabolic	rs181058325	6	25314597	G	0.655047	1.92523	0.0304335	9.29868e-103	logistic	708730	5021	703709	2	0.0872626	80.9641	5.25325	0.0219059	na	LDL,TC,nonHDL
Urea	Blood Biomarkers	rs760077	1	155178782	A	0.0664489	1.06871	0.00309662	3.79899e-102	linear	544352	NA	NA	2	0.0203751	71.6375	3.52578	0.0604215	na	nonHDL
Hypercholesterolemia	endocrine/metabolic	rs73015024	19	11197598	T	-0.160449	0.851761	0.0075196	5.09659e-101	logistic	712293	116806	595487	2	0.00170014	93.7172	15.9166	6.61961e-05	LDLR	LDL,TC,nonHDL
HDL_cholesterol	Blood Biomarkers	rs1800961	20	43042364	T	-0.0500292	0.951202	0.00235536	4.03318e-100	linear	509923	NA	NA	2	0.0261549	81.9621	5.54389	0.0185453	HNF4A	HDL,LDL,TC,nonHDL
Triglycerides	Blood Biomarkers	rs429358	19	45411941	C	0.066171	1.06841	0.00311767	5.6694e-100	linear	542544	NA	NA	2	0.0235073	94.0556	16.8227	4.10397e-05	APOE	HDL
Neutrophill_count	Blood Biomarkers	rs3128759	6	31885930	C	-0.0686551	0.933649	0.00324229	1.62812e-99	linear	519346	NA	NA	2	0	0	0.411344	0.521288	APOM	LDL,TC,nonHDL
Mean_platelet_thrombocyte_volume	Blood Biomarkers	rs9378248	6	31326289	G	0.0542254	1.05572	0.0025623	2.10345e-99	linear	531820	NA	NA	2	0.0417984	85.7667	7.0258	0.00803436	APOM	logTG
Neutrophill_count	Blood Biomarkers	rs2524143	6	31263510	T	-0.0720763	0.93046	0.00344189	2.27035e-97	linear	519550	NA	NA	2	0	0	0.655178	0.418267	APOM	TC
Albumin	Blood Biomarkers	rs142385484	19	50016759	T	0.183522	1.20144	0.00880598	1.85269e-96	linear	494487	NA	NA	2	0.0182298	70.4839	3.38798	0.0656733	FCGRT	LDL,TC,nonHDL
Myocardial infarction	circulatory system	rs10757273	9	22090301	A	0.150204	1.16207	0.00723382	9.13915e-96	logistic	686968	47626	639342	2	0	0	0.291596	0.589199	na	TC
Mean_platelet_thrombocyte_volume	Blood Biomarkers	rs603424	10	102075479	G	0.0669042	1.06919	0.00322687	1.72872e-95	linear	533561	NA	NA	2	0.0635814	82.6096	5.75029	0.0164859	na	LDL
Urea	Blood Biomarkers	rs6676150	1	155123837	C	0.0646436	1.06678	0.00312101	2.67701e-95	linear	539987	NA	NA	2	0.0303327	77.8686	4.51847	0.0335308	na	TC
Splenomegaly	digestive	rs77375493	9	5073770	T	2.96169	19.3307	0.143102	3.72773e-95	logistic	712119	4560	707559	2	0	0	0.0106385	0.91785	JAK2	HDL,TC
White_blood_cell_leukocyte_count	Blood Biomarkers	rs1264347	6	30798697	T	-0.139101	0.870141	0.00674012	1.25901e-94	linear	523888	NA	NA	2	0.0420837	71.358	3.49137	0.0616894	na	logTG
Mean_corpuscular_haemoglobin_concentration	Blood Biomarkers	rs2022003	1	158586966	A	0.0542147	1.05571	0.00263081	2.34604e-94	linear	547150	NA	NA	2	0	0	0.0847287	0.770989	SPTA1	LDL,nonHDL
LDL_cor	Blood Biomarkers	rs553427	1	234852760	C	-0.0397962	0.960985	0.00193625	7.20028e-94	linear	493623	NA	NA	2	0.283051	95.9539	24.7149	6.64696e-07	na	HDL
Hyperlipidemia	endocrine/metabolic	rs2980888	8	126507308	T	0.101777	1.10714	0.00495311	8.00035e-94	logistic	712299	280236	432063	2	0.000393367	88.8898	9.00072	0.00269873	TRIB1	HDL
LDL_cor	Blood Biomarkers	rs508293	1	234848712	G	-0.0398044	0.960977	0.00193915	1.24396e-93	linear	492569	NA	NA	2	0.314586	95.6773	23.1335	1.51138e-06	na	logTG
Angina pectoris	circulatory system	rs55730499	6	161005610	C	-0.236527	0.789365	0.0115392	2.26174e-93	logistic	712194	53049	659145	2	0.00259357	90.6821	10.732	0.00105298	IGF2R	TC
LDL_cor	Blood Biomarkers	rs557933	1	234853268	A	-0.0398311	0.960952	0.00194528	3.53641e-93	linear	490173	NA	NA	2	0.269442	95.7894	23.7498	1.09709e-06	IRF2BP2	LDL,TC
LDL_cor	Blood Biomarkers	rs558971	1	234853406	A	-0.0398226	0.96096	0.00194568	4.22173e-93	linear	490075	NA	NA	2	0.27044	95.8014	23.8177	1.05905e-06	na	nonHDL
Angina pectoris	circulatory system	rs10455872	6	161010118	A	-0.234788	0.790739	0.0114749	4.79439e-93	logistic	712628	53076	659552	2	0.00272844	91.1846	11.3438	0.000757019	PLG	LDL,nonHDL
White_blood_cell_leukocyte_count	Blood Biomarkers	rs1233393	6	29549653	G	-0.140518	0.868908	0.0068736	6.92213e-93	linear	540726	NA	NA	2	0	0	0.252465	0.615344	na	logTG
Albumin	Blood Biomarkers	rs139974673	15	44027885	T	-0.397045	0.672304	0.0194459	1.16001e-92	linear	505004	NA	NA	2	0.0820867	73.4676	3.76898	0.0522114	TP53BP1	logTG,nonHDL
Angina pectoris	circulatory system	rs1537373	9	22103341	G	0.134255	1.14368	0.00658185	1.75291e-92	logistic	710910	52996	657914	2	0.00170087	95.0836	20.3401	6.48291e-06	na	LDL
BMI	Physical Measures	rs1457489	18	57861961	G	-0.21399	0.807356	0.0105105	3.81621e-92	linear	561663	NA	NA	2	0.000228477	41.5422	1.71064	0.190903	na	logTG
White_blood_cell_leukocyte_count	Blood Biomarkers	rs2517601	6	30074072	C	-0.136615	0.872306	0.006747	3.67932e-91	linear	535807	NA	NA	2	0	0	0.685185	0.407807	na	logTG
Red_blood_cell_erythrocyte_count	Blood Biomarkers	rs17476364	10	71094504	C	0.0254857	1.02581	0.00126306	1.53308e-90	linear	549789	NA	NA	2	0	0	0.0484891	0.825713	HK1	LDL,TC,nonHDL
Mean_corpuscular_haemoglobin_concentration	Blood Biomarkers	rs857725	1	158607935	T	0.053626	1.05509	0.00266083	2.48973e-90	linear	548236	NA	NA	2	0	0	0.185109	0.667019	SPTA1	TC
Monocyte_count	Blood Biomarkers	rs2418130	9	113830547	C	0.0104532	1.01051	0.00052009	7.55163e-90	linear	507537	NA	NA	2	0	0	0.0112931	0.915369	na	HDL
HDL_cholesterol	Blood Biomarkers	rs1800978	9	107665978	G	-0.0252767	0.97504	0.00126271	3.8531e-89	linear	507792	NA	NA	2	0.00526083	73.8162	3.81915	0.0506699	ABCA1	logTG
Calcium	Blood Biomarkers	rs1260326	2	27730940	C	-0.00451492	0.995495	0.000226009	8.77591e-89	linear	376945	NA	NA	2	0.00315051	33.9543	1.5141	0.218514	na	HDL,LDL,TC,logTG,nonHDL
LDL_cor	Blood Biomarkers	rs77303550	16	72079657	T	-0.0489445	0.952234	0.00245362	1.56356e-88	linear	492629	NA	NA	2	0.313129	94.1779	17.1761	3.40701e-05	AP1G1	LDL,TC
Angina pectoris	circulatory system	rs1333047	9	22124504	T	0.131177	1.14017	0.00658329	2.43156e-88	logistic	711668	53016	658652	2	0.00185554	95.4758	22.1032	2.58374e-06	na	nonHDL
Hyperlipidemia	endocrine/metabolic	rs934197	2	21267461	G	-0.0955553	0.908868	0.00480958	7.74852e-88	logistic	711590	280122	431468	2	6.6826e-06	12.5998	1.14416	0.284775	APOB	LDL,TC,nonHDL
Mean_corpuscular_volume	Blood Biomarkers	rs7908745	10	45953767	A	-0.206817	0.813168	0.010436	2.09525e-87	linear	550793	NA	NA	2	0.0361983	82.1156	5.59145	0.0180483	na	LDL
Albumin	Blood Biomarkers	rs55707100	15	43820717	T	0.384084	1.46827	0.019397	2.9103e-87	linear	505330	NA	NA	2	0.0708555	71.6945	3.53288	0.0601631	na	HDL
Disorders of mineral metabolism	endocrine/metabolic	rs3118362	6	28785085	C	0.550099	1.73343	0.0278785	1.14552e-86	logistic	712628	5074	707554	2	0.0875803	83.0844	5.91171	0.0150405	TRIM27	LDL,TC,nonHDL
Celiac disease	digestive	rs6689	6	32627700	A	0.794025	2.21228	0.0403306	2.73732e-86	logistic	711484	3757	707727	2	0.0308429	89.1982	9.25775	0.00234501	BRD2	nonHDL
Red_blood_cell_erythrocyte_distribution_width	Blood Biomarkers	rs35657082	6	27067657	T	-0.0760676	0.926754	0.00387162	6.07816e-86	linear	526509	NA	NA	2	0.11185	82.3127	5.65378	0.0174178	na	LDL,TC,nonHDL
Total_bilirubin	Blood Biomarkers	rs17476364	10	71094504	C	0.302501	1.35324	0.0154173	1.02645e-85	linear	539733	NA	NA	2	0.0719149	90.5308	10.5606	0.00115526	HK1	LDL,TC,nonHDL
Mean_corpuscular_haemoglobin	Blood Biomarkers	rs806794	6	26200677	A	0.0892517	1.09336	0.00455669	1.99712e-85	linear	550815	NA	NA	2	0.010554	56.3345	2.29014	0.130198	HIST1H2BD	HDL
Haemoglobin_concentration	Blood Biomarkers	rs7776054	6	135418916	G	-0.0489799	0.9522	0.00251351	1.42534e-84	linear	549679	NA	NA	2	0.00124599	10.747	1.12041	0.28983	na	LDL,TC,nonHDL
Haemoglobin_concentration	Blood Biomarkers	rs7758845	6	135428537	C	-0.048099	0.953039	0.00247787	6.17788e-84	linear	549688	NA	NA	2	0	0	0.0808648	0.776129	na	HDL
LDL_cor	Blood Biomarkers	rs6874202	5	156391628	T	-0.0387369	0.962004	0.0020055	3.99311e-83	linear	494021	NA	NA	2	0.112846	90.7778	10.8434	0.0009915	na	LDL,TC,logTG,nonHDL
Albumin	Blood Biomarkers	rs113886122	19	50044741	C	0.161703	1.17551	0.00840058	1.43802e-82	linear	501759	NA	NA	2	0	0	0.00108699	0.973699	FCGRT	logTG
HDL_cholesterol	Blood Biomarkers	rs13107325	4	103188709	C	0.030173	1.03063	0.00157042	2.86222e-82	linear	509923	NA	NA	2	0.00926491	80.071	5.0178	0.025088	na	HDL,LDL,TC,logTG
Monocyte_percentage	Blood Biomarkers	rs2418130	9	113830547	C	0.121799	1.12953	0.00634158	3.2745e-82	linear	524684	NA	NA	2	0.00158132	17.7781	1.21622	0.270104	na	HDL
Triglycerides	Blood Biomarkers	rs4846913	1	230294715	C	0.0444886	1.04549	0.00231907	5.05708e-82	linear	542349	NA	NA	2	0.0060739	89.1643	9.22876	0.00238243	GALNT2	HDL,logTG
LDL_cor	Blood Biomarkers	rs681343	19	49206462	C	-0.0371498	0.963532	0.00193733	5.90047e-82	linear	494153	NA	NA	2	0.107005	91.0712	11.1998	0.00081808	na	LDL,nonHDL
Red_blood_cell_erythrocyte_count	Blood Biomarkers	rs653178	12	112007756	C	0.0150899	1.0152	0.000788883	1.47298e-81	linear	550686	NA	NA	2	0.0669594	90.9704	11.0747	0.000875113	ALDH2	LDL,TC,nonHDL
Red_blood_cell_erythrocyte_count	Blood Biomarkers	rs3184504	12	111884608	T	0.0150882	1.0152	0.00078892	1.56022e-81	linear	550686	NA	NA	2	0.0695246	91.2679	11.452	0.000714156	ALDH2	HDL
Celiac disease	digestive	rs35062987	6	32590735	C	0.71314	2.04039	0.0375404	1.82e-80	logistic	712538	3757	708781	2	0.0736448	96.1024	25.6568	4.07852e-07	BRD2	TC
CRP	Blood Biomarkers	rs1938498	1	66098653	T	0.190039	1.2093	0.0100041	1.83275e-80	linear	414669	NA	NA	2	0.0269327	95.6314	22.8908	1.71474e-06	LEPR	HDL
Red_blood_cell_erythrocyte_distribution_width	Blood Biomarkers	rs7412	19	45412079	T	0.0734935	1.07626	0.00390278	4.20351e-79	linear	533750	NA	NA	2	0	0	0.447126	0.503703	APOE	LDL,TC,nonHDL
Triglycerides	Blood Biomarkers	rs139974673	15	44027885	T	-0.136736	0.872201	0.00727776	9.43428e-79	linear	542200	NA	NA	2	0	0	0.055621	0.813556	TP53BP1	logTG,nonHDL
HDL_cholesterol	Blood Biomarkers	rs2203452	2	227094758	A	0.0161513	1.01628	0.000861102	1.71005e-78	linear	509829	NA	NA	2	0.0108738	93.3197	14.9693	0.000109275	na	logTG
Neutrophill_count	Blood Biomarkers	rs4760	19	44153100	G	-0.0813802	0.921843	0.00434166	2.16654e-78	linear	520893	NA	NA	2	0	0	0.26967	0.603553	na	HDL
Alcoholic liver damage	mental disorders	rs738408	22	44324730	T	0.329422	1.39016	0.0175796	2.38664e-78	logistic	712434	8461	703973	2	0	0	0.42872	0.512618	na	HDL,TC,logTG
Eosinophill_count	Blood Biomarkers	rs622871	6	31878495	A	-0.0061881	0.993831	0.000330754	4.17297e-78	linear	522714	NA	NA	2	0	0	0.26591	0.606089	APOM	logTG
HDL_cholesterol	Blood Biomarkers	rs2972145	2	227101309	C	-0.0161058	0.984023	0.000860996	4.42268e-78	linear	509643	NA	NA	2	0.0108271	93.3	14.9255	0.000111843	IRS1	HDL
Albumin	Blood Biomarkers	rs17580	14	94847262	T	-0.262769	0.768919	0.0140585	5.84452e-78	linear	505330	NA	NA	2	0	0	0.0979544	0.754298	SERPINA1	LDL,TC,nonHDL
HDL_cholesterol	Blood Biomarkers	rs2138157	2	227103717	A	0.016099	1.01623	0.000862217	8.42704e-78	linear	509022	NA	NA	2	0.00983592	92.6348	13.5774	0.000228931	IRS1	nonHDL
Other chronic nonalcoholic liver disease	digestive	rs58542926	19	19379549	T	0.310148	1.36363	0.0166133	8.90442e-78	logistic	712628	21875	690753	2	0.00715431	91.1465	11.295	0.000777154	na	LDL,TC,logTG,nonHDL
Triglycerides	Blood Biomarkers	rs998584	6	43757896	C	-0.0424728	0.958417	0.00227712	1.21642e-77	linear	538493	NA	NA	2	0.00149002	66.9218	3.02314	0.0820846	VEGFA	TC,logTG,nonHDL
Alcoholic liver damage	mental disorders	rs3747207	22	44324855	A	0.330668	1.3919	0.0177619	2.35011e-77	logistic	711743	8456	703287	2	0	0	0.137417	0.710863	na	LDL,nonHDL
Mean_corpuscular_haemoglobin	Blood Biomarkers	rs17476364	10	71094504	C	0.120389	1.12794	0.00647222	3.1628e-77	linear	549918	NA	NA	2	0	0	0.00963197	0.921819	HK1	LDL,TC,nonHDL
Triglycerides	Blood Biomarkers	rs55707100	15	43820717	T	0.13496	1.14449	0.00726435	4.80756e-77	linear	542544	NA	NA	2	0	0	0.0429857	0.835752	na	HDL
Red_blood_cell_erythrocyte_distribution_width	Blood Biomarkers	rs174564	11	61588305	A	0.0414102	1.04228	0.00223483	1.1942e-76	linear	533012	NA	NA	2	0.0189355	72.0207	3.57407	0.0586882	na	HDL,LDL,TC,logTG,nonHDL
HDL_cholesterol	Blood Biomarkers	rs3758673	11	47278917	C	-0.0165681	0.983568	0.000894329	1.28054e-76	linear	509909	NA	NA	2	0.0031149	79.0588	4.77527	0.0288714	NR1H3	HDL
HDL_cholesterol	Blood Biomarkers	rs3758669	11	47272579	G	0.0165684	1.01671	0.000894399	1.30739e-76	linear	509806	NA	NA	2	0.00302523	78.5152	4.65445	0.0309731	NR1H3	logTG
Celiac disease	digestive	rs2844795	6	30073847	C	0.435861	1.54629	0.0235454	1.66652e-76	logistic	712628	3758	708870	2	0.00395615	75.3681	4.05978	0.0439162	na	TC
Triglycerides	Blood Biomarkers	rs6073958	20	44551855	T	-0.052434	0.948917	0.00284184	5.14156e-76	linear	542021	NA	NA	2	0.000386837	26.2873	1.35662	0.244124	PLTP	HDL,logTG,nonHDL
Albumin	Blood Biomarkers	rs12948283	17	1622850	G	-0.135038	0.873682	0.00732401	6.53849e-76	linear	444880	NA	NA	2	0	0	0.462502	0.496457	RILP	nonHDL
Angina pectoris	circulatory system	rs10757273	9	22090301	A	0.126708	1.13509	0.00687607	7.92873e-76	logistic	686968	51489	635479	2	0.000937561	90.7475	10.8079	0.00101067	na	TC
Triglycerides	Blood Biomarkers	rs11967262	6	43760327	G	0.0414864	1.04236	0.00226778	9.2635e-75	linear	541382	NA	NA	2	0.00164397	69.4047	3.26848	0.070623	VEGFA	HDL
Haemoglobin_concentration	Blood Biomarkers	rs181058325	6	25314597	G	0.0784048	1.08156	0.00429201	1.49846e-74	linear	547173	NA	NA	2	0.0611603	62.0121	2.63242	0.104702	na	LDL,TC,nonHDL
HDL_cholesterol	Blood Biomarkers	rs538969346	18	46545976	G	-0.0802936	0.922845	0.00439586	1.55158e-74	linear	506972	NA	NA	2	0	0	0.0259852	0.871937	na	HDL,LDL,TC,nonHDL
Other diseases of blood and blood-forming organs	hematopoietic	rs77375493	9	5073770	T	2.58673	13.2863	0.141867	2.79735e-74	logistic	712119	6228	705891	2	0	0	0.0112407	0.915565	JAK2	HDL,TC
TC_cor	Blood Biomarkers	rs2070895	15	58723939	G	-0.0799654	0.923148	0.00438927	3.68826e-74	linear	493526	NA	NA	2	0.623727	96.5999	29.411	5.85457e-08	LIPC	TC
TC_cor	Blood Biomarkers	rs1077835	15	58723426	A	-0.0799753	0.923139	0.0043934	4.83893e-74	linear	492823	NA	NA	2	0.617749	96.5643	29.1061	6.85194e-08	LIPC	logTG,nonHDL
Mean_corpuscular_haemoglobin	Blood Biomarkers	rs7908745	10	45953767	A	-0.0788731	0.924157	0.00434072	8.83408e-74	linear	550815	NA	NA	2	0.00601135	43.3893	1.76645	0.183822	na	LDL
Memory loss	mental disorders	rs429358	19	45411941	C	0.247498	1.28082	0.0136468	1.658e-73	logistic	712628	20861	691767	2	0	0	0.0223949	0.881041	APOE	HDL
LDL_cor	Blood Biomarkers	rs11878908	19	49227443	C	-0.0350996	0.965509	0.00194268	5.7314e-73	linear	493379	NA	NA	2	0.105332	90.8317	10.9072	0.000957911	NUCB1	TC
Nonrheumatic aortic valve disorders	circulatory system	rs10455872	6	161010118	A	-0.303786	0.738019	0.0168799	2.05873e-72	logistic	712628	23585	689043	2	0.00508381	88.1046	8.40661	0.0037386	PLG	LDL,nonHDL
Mean_corpuscular_haemoglobin_concentration	Blood Biomarkers	rs35657082	6	27067657	T	0.0764877	1.07949	0.00427172	1.06662e-71	linear	540995	NA	NA	2	0.0550779	69.5219	3.28105	0.0700843	na	LDL,TC,nonHDL
Total_bilirubin	Blood Biomarkers	rs687339	3	135932359	T	-0.205197	0.814486	0.0114874	2.29526e-71	linear	539345	NA	NA	2	0	0	0.332013	0.564476	STAG1	HDL,nonHDL
LDL_cor	Blood Biomarkers	rs186021206	17	7069412	A	-0.265034	0.76718	0.0148401	2.44613e-71	linear	490941	NA	NA	2	23.7022	94.7622	19.0918	1.24578e-05	TP53	LDL,TC,nonHDL
Hypercholesterolemia	endocrine/metabolic	rs11591147	1	55505647	T	-0.363522	0.695223	0.0203714	3.17666e-71	logistic	712628	116844	595784	2	0	0	0.0101347	0.919811	PCSK9	LDL,TC,nonHDL
LDL_cor	Blood Biomarkers	rs247617	16	56990716	A	-0.0368418	0.963829	0.00206651	4.28053e-71	linear	494153	NA	NA	2	0	0	0.217551	0.640912	CETP	LDL,logTG
Nonrheumatic aortic valve disorders	circulatory system	rs55730499	6	161005610	C	-0.303597	0.738158	0.0170305	4.38312e-71	logistic	712194	23581	688613	2	0.00440746	86.4333	7.37099	0.00662844	IGF2R	TC
LDL_cor	Blood Biomarkers	rs183130	16	56991363	C	0.0368188	1.03751	0.00206598	4.81525e-71	linear	493733	NA	NA	2	0	0	0.86706	0.35177	CETP	HDL,TC,nonHDL
HbA1c	Blood Biomarkers	rs76895963	12	4384844	G	-1.06695	0.344055	0.0599503	7.41863e-71	linear	492476	NA	NA	2	0.25926	90.6322	10.6749	0.00108602	na	LDL,TC,logTG,nonHDL
Vitamin B-complex deficiencies	endocrine/metabolic	rs681343	19	49206462	C	0.169334	1.18452	0.00953205	1.3259e-70	logistic	712628	24223	688405	2	6.74802e-05	11.4503	1.12931	0.287923	na	LDL,nonHDL
HDL_cholesterol	Blood Biomarkers	rs192489212	11	117220429	A	-0.236455	0.789422	0.0133278	2.00599e-70	linear	509147	NA	NA	2	0	0	0.0162043	0.898706	SIDT2	HDL,LDL,logTG
Albumin	Blood Biomarkers	rs13108218	4	3443931	G	-0.112368	0.893715	0.00634458	3.45443e-70	linear	494189	NA	NA	2	0	0	0.202553	0.652668	LRPAP1	LDL,TC,logTG,nonHDL
BMI	Physical Measures	rs630372	1	177885762	A	0.193544	1.21354	0.0109547	7.4361e-70	linear	563140	NA	NA	2	0.00125982	78.3007	4.60845	0.0318147	na	HDL
Hyperlipidemia	endocrine/metabolic	rs58542926	19	19379549	T	-0.148999	0.86157	0.00845159	1.45591e-69	logistic	712628	280273	432355	2	0.00241803	94.3124	17.5822	2.75148e-05	na	LDL,TC,logTG,nonHDL
Type 2 diabetes	endocrine/metabolic	rs76895963	12	4384844	G	-0.432394	0.648954	0.0245333	1.59094e-69	logistic	700356	136143	564213	2	0.0194192	92.3923	13.1446	0.000288347	na	LDL,TC,logTG,nonHDL
HDL_cholesterol	Blood Biomarkers	rs921919	12	125265201	A	-0.0160075	0.98412	0.000910539	3.49113e-69	linear	486406	NA	NA	2	0	0	0.160834	0.68839	na	TC
Mean_corpuscular_volume	Blood Biomarkers	rs806794	6	26200677	A	0.192151	1.21185	0.0109554	7.17772e-69	linear	550793	NA	NA	2	0	0	0.544136	0.460724	HIST1H2BD	HDL
Type 2 diabetes	endocrine/metabolic	rs2972145	2	227101309	C	0.086939	1.09083	0.00495972	8.60517e-69	logistic	712313	136866	575447	2	0	0	0.67148	0.412536	IRS1	HDL
HDL_cholesterol	Blood Biomarkers	rs16942887	16	67928042	A	0.022567	1.02282	0.00129007	1.62282e-68	linear	509923	NA	NA	2	0	0	0.347108	0.555755	LCAT	logTG
Type 2 diabetes	endocrine/metabolic	rs2203452	2	227094758	A	-0.086756	0.916901	0.00496202	1.89664e-68	logistic	712522	136885	575637	2	0	0	0.767067	0.381126	na	logTG
White_blood_cell_leukocyte_count	Blood Biomarkers	rs13201681	6	28394680	T	-0.125289	0.882242	0.00716598	1.9041e-68	linear	540838	NA	NA	2	0	0	0.316841	0.573513	TRIM27	logTG
Calcium	Blood Biomarkers	rs11078597	17	1618363	T	-0.00494493	0.995067	0.000283227	2.92733e-68	linear	376945	NA	NA	2	0	0	0.666637	0.414227	SERPINF2	logTG
Type 2 diabetes	endocrine/metabolic	rs2138157	2	227103717	A	-0.0868041	0.916857	0.00497323	3.1942e-68	logistic	711576	136821	574755	2	0	0	0.761539	0.382847	IRS1	nonHDL
Triglycerides	Blood Biomarkers	rs2203452	2	227094758	A	-0.0412445	0.959594	0.00236813	6.18748e-68	linear	542441	NA	NA	2	0.0044475	84.7774	6.56916	0.0103761	na	logTG
HDL_cholesterol	Blood Biomarkers	rs2292318	16	67985706	C	-0.0220092	0.978231	0.00126412	6.84865e-68	linear	509714	NA	NA	2	0	0	0.195902	0.658049	na	HDL
Triglycerides	Blood Biomarkers	rs2138157	2	227103717	A	-0.0412759	0.959564	0.00237197	8.03304e-68	linear	541537	NA	NA	2	0.00382439	82.6595	5.76685	0.0163313	IRS1	nonHDL
Triglycerides	Blood Biomarkers	rs2972145	2	227101309	C	0.0411816	1.04204	0.0023679	9.54838e-68	linear	542239	NA	NA	2	0.00451609	84.9888	6.66171	0.00985061	IRS1	HDL
HbA1c	Blood Biomarkers	rs80215559	6	25918225	C	-0.449967	0.637649	0.0259012	1.33443e-67	linear	504185	NA	NA	2	0.105471	95.7466	23.5103	1.24244e-06	na	LDL,TC,nonHDL
CRP	Blood Biomarkers	rs1260326	2	27730940	C	-0.171428	0.842461	0.00988345	2.15158e-67	linear	414734	NA	NA	2	0.0263845	95.7772	23.6807	1.13716e-06	na	HDL,LDL,TC,logTG,nonHDL
Haemoglobin_concentration	Blood Biomarkers	rs3118362	6	28785085	C	0.0647895	1.06693	0.00373847	2.76845e-67	linear	550969	NA	NA	2	0	0	0.594181	0.440807	TRIM27	LDL,TC,nonHDL
LDL_cor	Blood Biomarkers	rs200489612	17	7106378	A	-0.28584	0.751383	0.0165238	4.8166e-67	linear	491616	NA	NA	2	18.4093	93.0347	14.3569	0.000151222	TP53	logTG
Triglycerides	Blood Biomarkers	rs192489212	11	117220429	A	0.6322	1.88175	0.0365961	7.24764e-67	linear	541692	NA	NA	2	0.863141	89.1227	9.19348	0.00242879	SIDT2	HDL,LDL,logTG
Eosinophill_count	Blood Biomarkers	rs6894249	5	131797547	A	-0.00541477	0.9946	0.000313732	9.54153e-67	linear	530345	NA	NA	2	0	0	0.124419	0.72429	IRF1	TC
Monocyte_count	Blood Biomarkers	rs876038	7	50308527	C	0.00897712	1.00902	0.000523102	5.17268e-66	linear	513125	NA	NA	2	0.00912675	58.1975	2.3922	0.121942	IKZF1	TC
Monocyte_count	Blood Biomarkers	rs876039	7	50308811	G	0.00897394	1.00901	0.000523138	5.85994e-66	linear	513092	NA	NA	2	0.00909597	58.1157	2.38753	0.122307	na	HDL
Neutrophill_count	Blood Biomarkers	rs1264347	6	30798697	T	-0.078878	0.924153	0.00460638	9.88739e-66	linear	503926	NA	NA	2	0.00559315	28.9472	1.4074	0.235488	na	logTG
Eosinophill_percentage	Blood Biomarkers	rs6894249	5	131797547	A	-0.0725666	0.930004	0.00423958	1.1187e-65	linear	540341	NA	NA	2	0.00369137	40.8668	1.6911	0.193456	IRF1	TC
Type 2 diabetes	endocrine/metabolic	rs7748382	6	20665549	G	-0.0852495	0.918283	0.00498403	1.37331e-65	logistic	712474	136878	575596	2	3.13658e-05	33.8159	1.51094	0.218996	na	logTG
Neutrophill_count	Blood Biomarkers	rs2248162	6	29915061	T	-0.0562193	0.945332	0.00329109	2.01054e-65	linear	520712	NA	NA	2	0.00167607	20.8108	1.2628	0.261122	GABBR1	HDL
Portal hypertension	digestive	rs738408	22	44324730	T	0.429498	1.53649	0.0251765	2.97053e-65	logistic	712434	3872	708562	2	0	0	0.0148505	0.903008	na	HDL,TC,logTG
Coronary atherosclerosis	circulatory system	rs7528419	1	109817192	G	-0.102315	0.902745	0.00600365	3.99628e-65	logistic	712628	123318	589310	2	0.000105314	54.8457	2.21463	0.136708	na	logTG
LDL_cor	Blood Biomarkers	rs174564	11	61588305	A	0.0345451	1.03515	0.00202766	4.36962e-65	linear	493445	NA	NA	2	0	0	0.915661	0.338617	na	HDL,LDL,TC,logTG,nonHDL
Mean_platelet_thrombocyte_volume	Blood Biomarkers	rs3862948	1	205099959	A	0.0489054	1.05012	0.00287588	7.4956e-65	linear	532966	NA	NA	2	0	0	0.804541	0.369739	na	HDL
Seborrheic keratosis	dermatologic	rs4449583	5	1284135	T	-0.103958	0.901263	0.00613141	1.76794e-64	logistic	705472	92295	613177	2	0.00201604	87.8148	8.20669	0.00417361	na	HDL
Triglycerides	Blood Biomarkers	rs799157	7	73020301	C	-0.0944001	0.909919	0.00556876	1.86823e-64	linear	542544	NA	NA	2	0.00279376	26.2385	1.35572	0.24428	MLXIPL	LDL,TC,nonHDL
Total_bilirubin	Blood Biomarkers	rs684773	3	135956305	A	0.193077	1.21298	0.011396	2.18283e-64	linear	540620	NA	NA	2	0.0673397	93.1909	14.6863	0.000126967	STAG1	logTG
HDL_cholesterol	Blood Biomarkers	rs686030	9	15304782	C	-0.0200168	0.980182	0.00118304	3.21331e-64	linear	509274	NA	NA	2	0.00031018	17.5893	1.21343	0.270653	na	HDL,TC,logTG
HbA1c	Blood Biomarkers	rs11708067	3	123065778	G	-0.269602	0.763683	0.0159436	3.81371e-64	linear	504185	NA	NA	2	0.0050137	76.0815	4.18086	0.040883	ADCY5	HDL
Neutrophill_count	Blood Biomarkers	rs1233393	6	29549653	G	-0.0796514	0.923438	0.00471311	4.5014e-64	linear	520744	NA	NA	2	0	0	0.118872	0.730261	na	logTG
HDL_cholesterol	Blood Biomarkers	rs1631174	11	47974373	C	-0.0147611	0.985347	0.000873748	4.97675e-64	linear	504294	NA	NA	2	0.000838957	49.8377	1.99353	0.157972	na	LDL
Mean_platelet_thrombocyte_volume	Blood Biomarkers	rs174564	11	61588305	A	0.0428235	1.04375	0.00253536	5.28783e-64	linear	532823	NA	NA	2	0.0112102	60.5617	2.53561	0.111304	na	HDL,LDL,TC,logTG,nonHDL
Portal hypertension	digestive	rs3747207	22	44324855	A	0.429194	1.53602	0.0254326	6.79152e-64	logistic	711743	3865	707878	2	0	0	0.0784923	0.779351	na	LDL,nonHDL
Lymphocyte_percentage	Blood Biomarkers	rs653178	12	112007756	C	0.27305	1.31397	0.0161936	8.62386e-64	linear	528555	NA	NA	2	0	0	0.0763313	0.782332	ALDH2	LDL,TC,nonHDL
LDL_cor	Blood Biomarkers	rs112771035	11	126225876	G	0.0631067	1.06514	0.00374313	8.9593e-64	linear	493691	NA	NA	2	0.85939	95.3241	21.3863	3.75441e-06	TIRAP	HDL,LDL,nonHDL
LDL_cor	Blood Biomarkers	rs9297994	8	59392324	A	-0.0345431	0.966047	0.00205138	1.26489e-63	linear	491708	NA	NA	2	0.301226	96.1129	25.7263	3.93436e-07	CYP7A1	LDL,TC,nonHDL
Urea	Blood Biomarkers	rs11878908	19	49227443	C	0.0512625	1.0526	0.00304576	1.45142e-63	linear	543579	NA	NA	2	0.0262576	77.1109	4.3689	0.0366006	NUCB1	TC
HbA1c	Blood Biomarkers	rs855791	22	37462936	G	-0.233838	0.79149	0.0139189	2.43755e-63	linear	496070	NA	NA	2	0.0180457	94.1272	17.0276	3.68398e-05	na	LDL
Urea	Blood Biomarkers	rs838133	19	49259529	G	0.0546182	1.05614	0.00325802	4.45949e-63	linear	498127	NA	NA	2	0.034896	78.2861	4.60534	0.0318726	na	logTG
Lymphocyte_percentage	Blood Biomarkers	rs3184504	12	111884608	T	0.270522	1.31065	0.0161945	1.21458e-62	linear	528555	NA	NA	2	0	0	0.0323056	0.857359	ALDH2	HDL
HDL_cholesterol	Blood Biomarkers	rs61941677	12	125325010	G	-0.0214592	0.978769	0.00128867	2.91594e-62	linear	494049	NA	NA	2	0.0100668	84.7414	6.55369	0.0104667	na	HDL
LDL_cor	Blood Biomarkers	rs2081687	8	59388565	C	-0.0340124	0.96656	0.00204403	3.58277e-62	linear	494153	NA	NA	2	0.311941	96.424	27.9645	1.23559e-07	na	logTG
LDL_cor	Blood Biomarkers	rs17725246	7	44581986	T	-0.0414771	0.959371	0.00249793	6.45869e-62	linear	493981	NA	NA	2	0.302127	94.3199	17.6052	2.71843e-05	OGDH	LDL,TC,nonHDL
HDL_cholesterol	Blood Biomarkers	rs3768321	1	40035928	T	-0.0171744	0.982972	0.00103655	1.17134e-61	linear	508813	NA	NA	2	0.00443957	77.3779	4.42046	0.0355105	PABPC4	HDL,logTG
Mean_corpuscular_haemoglobin_concentration	Blood Biomarkers	rs34265667	8	41542093	A	0.106128	1.11196	0.00643973	5.09299e-61	linear	548236	NA	NA	2	0	0	0.992973	0.319017	ANK1	TC
Eosinophill_count	Blood Biomarkers	rs3893464	6	29935250	G	0.00501364	1.00503	0.000305322	1.35667e-60	linear	531022	NA	NA	2	5.57067e-05	1.27642	1.01293	0.314202	na	LDL
Unstable angina (intermediate coronary syndrome)	circulatory system	rs10455872	6	161010118	A	-0.272301	0.761625	0.0165832	1.36929e-60	logistic	712628	23534	689094	2	0.00097194	60.2515	2.51582	0.112709	PLG	LDL,nonHDL
Unstable angina (intermediate coronary syndrome)	circulatory system	rs55730499	6	161005610	C	-0.274272	0.760125	0.0167174	1.72157e-60	logistic	712194	23526	688668	2	0.000818777	55.9332	2.26928	0.131961	IGF2R	TC
Neutrophill_count	Blood Biomarkers	rs2517601	6	30074072	C	-0.0757215	0.927074	0.00461973	2.22218e-60	linear	515836	NA	NA	2	0	0	0.146994	0.701425	na	logTG
HbA1c	Blood Biomarkers	rs11719201	3	123068744	T	-0.260687	0.770522	0.015906	2.28375e-60	linear	502550	NA	NA	2	0.00366565	69.9833	3.33148	0.0679655	na	LDL,TC
Mean_platelet_thrombocyte_volume	Blood Biomarkers	rs56853305	17	27648542	A	0.0577188	1.05942	0.00352177	2.2861e-60	linear	526189	NA	NA	2	0	0	0.710598	0.399246	na	TC
BMI	Physical Measures	rs10938398	4	45186139	A	0.153802	1.16626	0.00938782	2.52339e-60	linear	562822	NA	NA	2	0.00161714	86.3196	7.30972	0.00685825	na	HDL
Mean_platelet_thrombocyte_volume	Blood Biomarkers	rs56336338	17	27645258	A	0.0571942	1.05886	0.00350595	7.92012e-60	linear	527885	NA	NA	2	0	0	0.508169	0.475933	na	LDL,nonHDL
Actinic keratosis	dermatologic	rs10810657	9	16884586	A	0.0986409	1.10367	0.00604881	8.73002e-60	logistic	702343	90069	612274	2	0	0	0.13931	0.708968	na	nonHDL
Red_blood_cell_erythrocyte_count	Blood Biomarkers	rs1434282	1	199010721	C	0.0145014	1.01461	0.000890308	1.19953e-59	linear	545646	NA	NA	2	0.00357233	27.1511	1.3727	0.241348	PTPRC	LDL,TC
Red_blood_cell_erythrocyte_distribution_width	Blood Biomarkers	rs181058325	6	25314597	G	-0.0672521	0.934959	0.00414363	3.08294e-59	linear	529954	NA	NA	2	0.115323	78.9746	4.75614	0.0291939	na	LDL,TC,nonHDL
Total_bilirubin	Blood Biomarkers	rs1711171	3	136020541	T	0.180669	1.19802	0.0111645	6.70007e-59	linear	537943	NA	NA	2	0.045974	92.1799	12.7875	0.000348938	STAG1	LDL
White_blood_cell_leukocyte_count	Blood Biomarkers	rs2248162	6	29915061	T	-0.0776744	0.925266	0.00480048	6.91806e-59	linear	540695	NA	NA	2	0.00855635	52.1972	2.09193	0.148079	GABBR1	HDL
Neutrophill_count	Blood Biomarkers	rs1938498	1	66098653	T	0.0528986	1.05432	0.00327209	8.67327e-59	linear	520827	NA	NA	2	0.000678305	9.91881	1.11011	0.292058	LEPR	HDL
HDL_cholesterol	Blood Biomarkers	rs41272086	6	161008646	G	0.0215701	1.0218	0.00133665	1.39039e-58	linear	509173	NA	NA	2	0	0	0.500051	0.479478	IGF2R	HDL,logTG
LDL_cor	Blood Biomarkers	rs6029549	20	39754695	C	-0.031259	0.969225	0.00193716	1.41397e-58	linear	493486	NA	NA	2	0	0	0.71721	0.397061	PLCG1	LDL,nonHDL
LDL_cor	Blood Biomarkers	rs6029552	20	39760448	C	-0.031248	0.969235	0.00193696	1.50891e-58	linear	493534	NA	NA	2	0	0	0.715191	0.397726	PLCG1	TC
Alanine_aminotransferase	Blood Biomarkers	rs28601761	8	126500031	G	-0.473283	0.622953	0.0293549	1.76342e-58	linear	525710	NA	NA	2	0.0836732	96.2944	26.9862	2.04917e-07	na	LDL,TC,logTG,nonHDL
White_blood_cell_leukocyte_count	Blood Biomarkers	rs1264377	6	30764907	A	-0.0960829	0.908389	0.00597052	2.86122e-58	linear	540877	NA	NA	2	0.0214414	62.532	2.66895	0.102324	na	HDL
Actinic keratosis	dermatologic	rs28498684	9	16900695	G	0.0974236	1.10233	0.00605476	2.97856e-58	logistic	708536	90127	618409	2	0	0	0.215916	0.64217	na	LDL,TC
Haematocrit_percentage	Blood Biomarkers	rs35657082	6	27067657	T	0.189659	1.20884	0.0117908	3.23322e-58	linear	543734	NA	NA	2	0.0120344	29.8874	1.42628	0.232373	na	LDL,TC,nonHDL
LDL_cor	Blood Biomarkers	rs55696093	7	21605973	A	-0.0375083	0.963186	0.0023347	4.4455e-58	linear	493535	NA	NA	2	0.106842	86.9134	7.64142	0.00570429	na	LDL,TC,logTG,nonHDL
LDL_cor	Blood Biomarkers	rs1169288	12	121416650	A	-0.033769	0.966795	0.00210552	6.90162e-58	linear	487552	NA	NA	2	0.153883	92.705	13.7079	0.000213549	HNF1A	LDL,TC
Creatinine	Blood Biomarkers	rs1047891	2	211540507	A	0.592038	1.80767	0.0369283	7.62636e-58	linear	544796	NA	NA	2	0.0604208	85.5929	6.94101	0.00842418	na	HDL
HDL_cholesterol	Blood Biomarkers	rs7133378	12	124409502	A	0.0142224	1.01432	0.000887244	7.90337e-58	linear	507724	NA	NA	2	0.00187017	69.4365	3.27187	0.0704772	na	HDL,nonHDL
HDL_cholesterol	Blood Biomarkers	rs367070	19	54800500	A	-0.0158473	0.984278	0.000988803	8.31352e-58	linear	506125	NA	NA	2	0.00167992	59.7796	2.4863	0.114841	na	HDL
Red_blood_cell_erythrocyte_count	Blood Biomarkers	rs4946955	6	109639710	G	0.0139138	1.01401	0.000868262	8.56955e-58	linear	539845	NA	NA	2	0	0	0.671914	0.412385	na	HDL
Hypercholesterolemia	endocrine/metabolic	rs28601761	8	126500031	G	-0.0780241	0.924942	0.00487373	1.10402e-57	logistic	693871	114547	579324	2	0.000317076	86.923	7.64702	0.00568661	na	LDL,TC,logTG,nonHDL
Total_bilirubin	Blood Biomarkers	rs10761750	10	65128619	G	0.154251	1.16678	0.00964117	1.29411e-57	linear	540542	NA	NA	2	0	0	0.703163	0.401723	JMJD1C	LDL
Mean_corpuscular_volume	Blood Biomarkers	rs11549407	11	5248004	A	-13.2811	1.70644e-06	0.83027	1.35973e-57	linear	550420	NA	NA	2	0	0	0.146965	0.701453	na	TC
TC_cor	Blood Biomarkers	rs174564	11	61588305	A	0.0608263	1.06271	0.00380339	1.4376e-57	linear	493978	NA	NA	2	0.0109844	40.2474	1.67357	0.195782	na	HDL,LDL,TC,logTG,nonHDL
Calcium	Blood Biomarkers	rs1688040	19	35553830	G	-0.0070448	0.99298	0.000440658	1.57413e-57	linear	376915	NA	NA	2	0	0	0.127375	0.72117	HPN	TC
Neutrophill_count	Blood Biomarkers	rs4795393	17	37893484	C	0.0528564	1.05428	0.00330916	1.97744e-57	linear	514960	NA	NA	2	0	0	8.26638e-05	0.992746	MED1	TC
Hyperlipidemia	endocrine/metabolic	rs4245791	2	44074431	T	-0.0764493	0.9264	0.00478875	2.26338e-57	logistic	712628	280273	432355	2	0	0	0.314697	0.574812	ABCG5	LDL,TC,logTG,nonHDL
Albumin	Blood Biomarkers	rs187918276	4	74033564	G	3.49284	32.8792	0.218857	2.44951e-57	linear	505139	NA	NA	2	51.1144	86.3749	7.33939	0.00674597	na	LDL
LDL_cor	Blood Biomarkers	rs80215559	6	25918225	C	-0.0578125	0.943827	0.00362446	2.81806e-57	linear	494153	NA	NA	2	0.82521	94.7002	18.8687	1.40035e-05	na	LDL,TC,nonHDL
Creatinine	Blood Biomarkers	rs28687959	4	77421345	C	-0.551672	0.575986	0.0346605	4.87119e-57	linear	543579	NA	NA	2	0.161518	94.654	18.7056	1.52536e-05	na	logTG
Triglycerides	Blood Biomarkers	rs4846923	1	230307222	G	-0.040055	0.960737	0.00251927	6.3943e-57	linear	532098	NA	NA	2	0.00336168	79.2638	4.82247	0.028091	GALNT2	nonHDL
HDL_cholesterol	Blood Biomarkers	rs103294	19	54797848	C	-0.0156537	0.984468	0.000984643	6.56155e-57	linear	509923	NA	NA	2	0.00259857	69.695	3.29979	0.0692888	na	TC
HDL_cholesterol	Blood Biomarkers	rs1476306	16	67973171	C	-0.0176708	0.982484	0.00111338	1.00064e-56	linear	509607	NA	NA	2	0	0	0.196303	0.657722	LCAT	TC
Mean_corpuscular_volume	Blood Biomarkers	rs1434282	1	199010721	C	-0.173812	0.840455	0.0109751	1.72962e-56	linear	545754	NA	NA	2	0	0	0.10958	0.740622	PTPRC	LDL,TC
LDL_cor	Blood Biomarkers	rs2244608	12	121416988	A	-0.0329283	0.967608	0.00207954	1.80171e-56	linear	494153	NA	NA	2	0.140329	92.032	12.5503	0.000396152	HNF1A	nonHDL
LDL_cor	Blood Biomarkers	rs35282906	6	32657201	T	-0.0469498	0.954135	0.00296898	2.51455e-56	linear	494125	NA	NA	2	0.114158	81.5919	5.43238	0.0197667	BRD2	LDL
Essential hypertension	circulatory system	rs1275979	2	26923568	T	0.0656509	1.06785	0.00416285	4.95415e-56	logistic	710074	340735	369339	2	7.01879e-05	65.8597	2.92909	0.0869966	na	LDL
HDL_cholesterol	Blood Biomarkers	rs2925979	16	81534790	T	-0.0140995	0.985999	0.000897728	1.38223e-55	linear	509923	NA	NA	2	0.00101137	55.3273	2.2385	0.134611	CMIP	HDL,logTG
Hypercholesterolemia	endocrine/metabolic	rs934197	2	21267461	G	-0.0775954	0.925339	0.00495654	3.06412e-55	logistic	711590	116702	594888	2	0.000127184	72.0959	3.5837	0.0583491	APOB	LDL,TC,nonHDL
Alanine_aminotransferase	Blood Biomarkers	rs2980888	8	126507308	T	0.484259	1.62297	0.030979	4.41724e-55	linear	543261	NA	NA	2	0.102052	96.5597	29.0671	6.99143e-08	TRIB1	HDL
Aspartate_aminotransferase	Blood Biomarkers	rs1408579	10	101912194	C	0.348559	1.41702	0.0223238	5.86876e-55	linear	538715	NA	NA	2	0.0203847	87.7055	8.13372	0.00434496	SCD	HDL,logTG
Triglycerides	Blood Biomarkers	rs9378248	6	31326289	G	-0.0374331	0.963259	0.00240086	8.30801e-55	linear	540856	NA	NA	2	0.00613704	89.1433	9.2109	0.00240578	APOM	logTG
Red_blood_cell_erythrocyte_count	Blood Biomarkers	rs17625587	1	198990494	A	0.014066	1.01417	0.00090239	8.85866e-55	linear	546972	NA	NA	2	0	0	0.902756	0.342044	PTPRC	nonHDL
Haemoglobin_concentration	Blood Biomarkers	rs13201681	6	28394680	T	-0.0534277	0.947975	0.0034291	9.84978e-55	linear	550930	NA	NA	2	0	0	0.39708	0.528601	TRIM27	logTG
Essential hypertension	circulatory system	rs1275984	2	26911509	A	0.0650046	1.06716	0.00417349	1.0664e-54	logistic	708197	340187	368010	2	5.86446e-05	61.5941	2.60377	0.10661	na	TC
Hyperlipidemia	endocrine/metabolic	rs2519093	9	136141870	C	-0.089032	0.914816	0.00572456	1.52686e-54	logistic	712322	280232	432090	2	0.000830195	92.6427	13.5919	0.000227166	na	HDL,TC,nonHDL
HDL_cholesterol	Blood Biomarkers	rs34895872	11	48021778	A	-0.0147369	0.985371	0.00094792	1.68004e-54	linear	508159	NA	NA	2	0	0	0.65461	0.418469	CELF1	TC
Essential hypertension	circulatory system	rs13394970	2	26929282	T	0.0643599	1.06648	0.00415591	4.28786e-54	logistic	709223	340516	368707	2	5.10543e-05	58.4742	2.40814	0.120705	PREB	nonHDL
Red_blood_cell_erythrocyte_count	Blood Biomarkers	rs17585887	6	139835498	T	-0.012404	0.987673	0.000801362	4.83216e-54	linear	550648	NA	NA	2	0.0203748	74.1075	3.86212	0.049388	CITED2	HDL,logTG
Hyperlipidemia	endocrine/metabolic	rs507666	9	136149399	G	-0.0885004	0.915303	0.00571982	5.31186e-54	logistic	712628	280273	432355	2	0.000834587	92.6893	13.6786	0.000216907	na	LDL
Eosinophill_count	Blood Biomarkers	rs3128759	6	31885930	C	-0.00482192	0.99519	0.000312979	1.47982e-53	linear	529493	NA	NA	2	0	0	0.876367	0.349199	APOM	LDL,TC,nonHDL
Red_blood_cell_erythrocyte_distribution_width	Blood Biomarkers	rs3118362	6	28785085	C	-0.0555113	0.946001	0.00361003	2.33704e-53	linear	533750	NA	NA	2	0	0	0.861557	0.353303	TRIM27	LDL,TC,nonHDL
Mean_platelet_thrombocyte_volume	Blood Biomarkers	rs55719615	15	63344167	G	0.0412829	1.04215	0.0026871	2.88281e-53	linear	520151	NA	NA	2	0.0108916	55.9796	2.27167	0.131758	USP3	HDL
Mean_corpuscular_volume	Blood Biomarkers	rs11089629	22	21958872	G	-0.189214	0.82761	0.0123162	2.89963e-53	linear	550537	NA	NA	2	0.0222139	67.3084	3.05889	0.0802967	na	HDL
Direct_bilirubin	Blood Biomarkers	rs17476364	10	71094504	C	0.0494686	1.05071	0.00322212	3.39075e-53	linear	423719	NA	NA	2	0	0	0.0126565	0.910426	HK1	LDL,TC,nonHDL
Red_blood_cell_erythrocyte_distribution_width	Blood Biomarkers	rs9438905	1	25764177	A	-0.0329021	0.967633	0.00214682	5.12653e-53	linear	531989	NA	NA	2	0	0	0.379535	0.537852	LDLRAP1	nonHDL
HDL_cholesterol	Blood Biomarkers	rs384116	19	54796719	G	0.0148408	1.01495	0.00096863	5.50166e-53	linear	509254	NA	NA	2	0.00123515	53.2378	2.13848	0.143644	na	logTG
Red_blood_cell_erythrocyte_distribution_width	Blood Biomarkers	rs10903129	1	25768937	A	-0.0327973	0.967735	0.00214304	7.17753e-53	linear	533750	NA	NA	2	0	0	0.330518	0.565354	LDLRAP1	LDL
HDL_cholesterol	Blood Biomarkers	rs12303671	12	124492610	G	0.0133565	1.01345	0.000873666	9.20748e-53	linear	507962	NA	NA	2	0.00531741	86.6936	7.51517	0.00611814	na	logTG
Neutrophill_count	Blood Biomarkers	rs55709272	2	113867288	C	0.0489315	1.05015	0.00320146	9.75358e-53	linear	517566	NA	NA	2	0	0	0.77462	0.378792	na	logTG
Mean_corpuscular_haemoglobin	Blood Biomarkers	rs11549407	11	5248004	A	-5.28474	0.00506834	0.345774	9.80576e-53	linear	550442	NA	NA	2	35.2278	64.6118	2.8258	0.0927607	na	TC
Mean_corpuscular_volume	Blood Biomarkers	rs140490	22	21921686	T	-0.18837	0.828308	0.0123255	9.93476e-53	linear	550519	NA	NA	2	0.0200608	64.6455	2.82849	0.0926053	YDJC	nonHDL
Neutrophill_count	Blood Biomarkers	rs6734238	2	113841030	G	0.0491924	1.05042	0.00322014	1.09707e-52	linear	520893	NA	NA	2	0	0	0.0502867	0.822565	na	LDL,TC
LDL_cor	Blood Biomarkers	rs6689	6	32627700	A	-0.0378645	0.962843	0.00247893	1.13006e-52	linear	493060	NA	NA	2	0.321067	93.6183	15.6697	7.54228e-05	BRD2	nonHDL
Red_blood_cell_erythrocyte_distribution_width	Blood Biomarkers	rs11802413	1	25760920	C	-0.0328104	0.967722	0.00214872	1.21623e-52	linear	531478	NA	NA	2	0	0	0.493266	0.482474	LDLRAP1	TC
Mean_corpuscular_volume	Blood Biomarkers	rs5754217	22	21939675	T	-0.187994	0.82862	0.0123187	1.39415e-52	linear	550793	NA	NA	2	0.0193898	64.3768	2.80716	0.0938445	na	logTG
Mean_corpuscular_volume	Blood Biomarkers	rs17625587	1	198990494	A	-0.169727	0.843895	0.0111239	1.45828e-52	linear	547080	NA	NA	2	0	0	0.285058	0.593405	PTPRC	nonHDL
HDL_cholesterol	Blood Biomarkers	rs3808460	8	116597635	T	-0.0126892	0.987391	0.000831654	1.46138e-52	linear	509436	NA	NA	2	0.00201116	73.6112	3.78948	0.0515756	na	HDL
Celiac disease	digestive	rs35282906	6	32657201	T	0.746519	2.10964	0.0491239	3.72202e-52	logistic	712598	3758	708840	2	0.102986	95.2873	21.2191	4.09668e-06	BRD2	LDL
Mean_corpuscular_volume	Blood Biomarkers	rs59391722	22	21920817	C	-0.188484	0.828214	0.0124054	3.89521e-52	linear	550512	NA	NA	2	0.0136515	54.0146	2.1746	0.140306	na	TC
Calcium	Blood Biomarkers	rs58895965	19	35551428	C	-0.00440792	0.995602	0.000290349	4.69547e-52	linear	376784	NA	NA	2	0	0	0.0070756	0.932964	na	logTG
Mean_corpuscular_volume	Blood Biomarkers	rs2022003	1	158586966	A	-0.164296	0.848491	0.0108488	8.28296e-52	linear	549707	NA	NA	2	0.0153197	64.4371	2.81192	0.0935665	SPTA1	LDL,nonHDL
Eosinophill_count	Blood Biomarkers	rs2524143	6	31263510	T	-0.00503006	0.994983	0.000332439	1.01483e-51	linear	529697	NA	NA	2	0.00485874	45.8583	1.84701	0.174132	APOM	TC
Total_bilirubin	Blood Biomarkers	rs7924036	10	65191645	T	-0.145529	0.864565	0.00962918	1.32227e-51	linear	540479	NA	NA	2	0	0	0.392317	0.531084	JMJD1C	logTG
Multiple sclerosis	neurological	rs622871	6	31878495	A	0.351634	1.42139	0.0232723	1.40016e-51	logistic	704049	4094	699955	2	0.00752205	87.2193	7.82428	0.0051549	APOM	logTG
Altered mental status	mental disorders	rs429358	19	45411941	C	0.216796	1.24209	0.014365	1.8299e-51	logistic	712628	18108	694520	2	0.0104443	95.7277	23.4068	1.31112e-06	APOE	HDL
Monocyte_percentage	Blood Biomarkers	rs896263	16	85927519	C	0.103861	1.10945	0.00688988	2.38514e-51	linear	524374	NA	NA	2	0.00517099	32.1461	1.47376	0.224754	na	HDL
Total_bilirubin	Blood Biomarkers	rs7916868	10	64988931	A	0.145235	1.15631	0.00963874	2.63725e-51	linear	539588	NA	NA	2	0	0	0.222189	0.637377	JMJD1C	HDL
Mean_corpuscular_volume	Blood Biomarkers	rs4449583	5	1284135	T	-0.1575	0.854277	0.0104579	2.95056e-51	linear	543886	NA	NA	2	0.0504943	86.3945	7.34996	0.00670644	na	HDL
Albumin	Blood Biomarkers	rs4841133	8	9183664	A	-0.157793	0.854027	0.010495	4.32527e-51	linear	505236	NA	NA	2	0.073752	88.3779	8.60427	0.00335376	TNKS	nonHDL
White_blood_cell_leukocyte_count	Blood Biomarkers	rs1321505	6	28052823	C	-0.0960392	0.908428	0.00639925	6.51873e-51	linear	540872	NA	NA	2	0.036416	69.9074	3.32308	0.0683139	ZKSCAN4	HDL
HDL_cholesterol	Blood Biomarkers	rs2792751	10	113940329	C	-0.0138517	0.986244	0.000923039	6.6503e-51	linear	509923	NA	NA	2	0	0	0.197879	0.656438	na	LDL
LDL_cor	Blood Biomarkers	rs8077106	17	45653291	G	-0.0290583	0.97136	0.00193853	8.5521e-51	linear	492400	NA	NA	2	0.137432	90.1913	10.195	0.00140823	KPNB1	nonHDL
Monocyte_count	Blood Biomarkers	rs1264347	6	30798697	T	-0.0106142	0.989442	0.000708359	9.31877e-51	linear	496499	NA	NA	2	0.00904704	40.0338	1.66761	0.196579	na	logTG
White_blood_cell_leukocyte_count	Blood Biomarkers	rs4760	19	44153100	G	-0.0948493	0.90951	0.00633341	1.05346e-50	linear	540877	NA	NA	2	0.0333392	70.9898	3.44707	0.0633641	na	HDL
LDL_cor	Blood Biomarkers	rs12603290	17	45650196	C	-0.029032	0.971385	0.00193871	1.07072e-50	linear	492349	NA	NA	2	0.136932	90.1582	10.1607	0.00143463	KPNB1	TC
LDL_cor	Blood Biomarkers	rs4841132	8	9183596	A	-0.050089	0.951145	0.00335419	2.00141e-50	linear	494153	NA	NA	2	0.223443	87.1322	7.77131	0.00530825	TNKS	HDL,LDL,TC
Eosinophill_count	Blood Biomarkers	rs1233393	6	29549653	G	-0.00679456	0.993228	0.00045507	2.07809e-50	linear	530891	NA	NA	2	0	0	0.0265414	0.870585	na	logTG
Red_blood_cell_erythrocyte_count	Blood Biomarkers	rs2982521	6	139835329	T	0.0121802	1.01225	0.000815934	2.16873e-50	linear	550621	NA	NA	2	0.0274094	78.8697	4.73255	0.029597	na	TC,nonHDL
HDL_cholesterol	Blood Biomarkers	rs2803619	10	113934384	G	0.0137715	1.01387	0.000922831	2.33317e-50	linear	509781	NA	NA	2	0	0	0.923997	0.336428	na	HDL,TC,logTG
Type 2 diabetes with ophthalmic manifestations	endocrine/metabolic	rs56094641	16	53806453	G	0.135023	1.14456	0.00905212	2.58631e-50	logistic	712424	27899	684525	2	0	0	0.142608	0.705702	na	HDL
Other disorders of circulatory system	circulatory system	rs2519093	9	136141870	C	-0.15791	0.853926	0.0106036	3.70565e-50	logistic	712322	30010	682312	2	0.00445947	57.581	2.35744	0.124687	na	HDL,TC,nonHDL
HDL_cholesterol	Blood Biomarkers	rs13234269	7	130429186	A	0.0123693	1.01245	0.000830776	3.89117e-50	linear	503709	NA	NA	2	0.007575	91.0676	11.1952	0.000820094	na	HDL,logTG
Neutrophill_percentage	Blood Biomarkers	rs4760	19	44153100	G	-0.379258	0.684369	0.0255051	5.16807e-50	linear	516992	NA	NA	2	0.0780447	87.436	7.95922	0.00478431	na	HDL
BMI	Physical Measures	rs2353487	11	27690399	C	0.146776	1.15809	0.00987488	5.67987e-50	linear	561319	NA	NA	2	0	0	0.438636	0.507781	na	HDL
Red_blood_cell_erythrocyte_count	Blood Biomarkers	rs635769	6	139831981	C	0.0121267	1.0122	0.000815999	5.88749e-50	linear	550476	NA	NA	2	0.0263525	78.1532	4.57733	0.0323976	na	LDL
Triglycerides	Blood Biomarkers	rs13389219	2	165528876	T	-0.0343922	0.966193	0.00231558	6.70076e-50	linear	542391	NA	NA	2	0.00110302	60.2014	2.51265	0.112936	na	logTG
LDL_cor	Blood Biomarkers	rs4264433	17	45737275	T	-0.0288399	0.971572	0.0019421	6.97067e-50	linear	490840	NA	NA	2	0.103539	89.7179	9.72563	0.00181716	NFE2L1	HDL
Neutrophill_count	Blood Biomarkers	rs13398728	2	113842506	C	0.0481226	1.0493	0.00324124	7.28003e-50	linear	520533	NA	NA	2	0	0	0.0887714	0.765745	na	nonHDL
Calcium	Blood Biomarkers	rs13108218	4	3443931	G	-0.00343062	0.996575	0.000231177	8.10059e-50	linear	365812	NA	NA	2	0	0	0.359055	0.549032	LRPAP1	LDL,TC,logTG,nonHDL
LDL_cor	Blood Biomarkers	rs35062987	6	32590735	C	-0.0362175	0.964431	0.00244084	8.30346e-50	linear	494070	NA	NA	2	0.195187	92.3777	13.1194	0.000292258	BRD2	TC
LDL_cor	Blood Biomarkers	rs4841133	8	9183664	A	-0.0496678	0.951546	0.0033475	8.41034e-50	linear	494052	NA	NA	2	0.220753	87.0488	7.72131	0.00545729	TNKS	nonHDL
Other disorders of circulatory system	circulatory system	rs507666	9	136149399	G	-0.157217	0.854518	0.0105987	8.87947e-50	logistic	712628	30029	682599	2	0.00479406	59.3342	2.45907	0.116848	na	LDL
Mean_corpuscular_volume	Blood Biomarkers	rs857725	1	158607935	T	-0.162742	0.84981	0.0109783	1.02481e-49	linear	550793	NA	NA	2	0.0178785	67.242	3.05269	0.0806035	SPTA1	TC
LDL_cor	Blood Biomarkers	rs11870935	17	45732605	A	-0.0287091	0.971699	0.00193674	1.03421e-49	linear	492943	NA	NA	2	0.0980811	89.2803	9.32861	0.00225603	KPNB1	LDL
Triglycerides	Blood Biomarkers	rs3775228	4	87985166	C	-0.0344895	0.966098	0.00232673	1.03804e-49	linear	536930	NA	NA	2	0.000307608	28.3102	1.3949	0.23758	HSD17B11	nonHDL
Triglycerides	Blood Biomarkers	rs1495741	8	18272881	A	-0.0404133	0.960392	0.0027274	1.12844e-49	linear	542544	NA	NA	2	0.0019226	65.7078	2.91612	0.0876987	na	nonHDL
LDL_cor	Blood Biomarkers	rs74612335	11	126238633	T	-0.0423457	0.958538	0.00285815	1.15838e-49	linear	491687	NA	NA	2	0.563021	96.1205	25.7768	3.83277e-07	na	TC
BMI	Physical Measures	rs7132908	12	50263148	A	0.140426	1.15076	0.00948859	1.47645e-49	linear	563664	NA	NA	2	0.000144302	36.3435	1.57093	0.210072	na	HDL
Triglycerides	Blood Biomarkers	rs35246381	8	18272535	T	-0.0403577	0.960446	0.00272739	1.52735e-49	linear	542181	NA	NA	2	0.0016632	61.6892	2.61023	0.106176	PCM1	logTG
Albumin	Blood Biomarkers	rs4841132	8	9183596	A	-0.155579	0.855919	0.0105153	1.56714e-49	linear	505330	NA	NA	2	0.0704811	87.8567	8.23499	0.00410905	TNKS	HDL,LDL,TC
Triglycerides	Blood Biomarkers	rs35570672	8	18272635	C	-0.0403852	0.960419	0.00273064	1.70804e-49	linear	542170	NA	NA	2	0.00165615	61.5907	2.60354	0.106626	na	TC
LDL_cor	Blood Biomarkers	rs2618566	20	17844684	T	-0.0300504	0.970397	0.00204038	4.27082e-49	linear	494153	NA	NA	2	0.340387	96.4998	28.57	9.03729e-08	RRBP1	LDL,TC,nonHDL
Monocyte_count	Blood Biomarkers	rs2517601	6	30074072	C	-0.0104558	0.989599	0.000710954	5.84118e-49	linear	508409	NA	NA	2	0.00193427	11.7842	1.13358	0.287012	na	logTG
HDL_cholesterol	Blood Biomarkers	rs13241165	7	130432538	T	0.0121039	1.01218	0.000824006	7.56931e-49	linear	509487	NA	NA	2	0.00970599	93.1379	14.5728	0.00013485	na	nonHDL
Other chronic ischemic heart disease, unspecified	circulatory system	rs7528419	1	109817192	G	-0.0976182	0.906995	0.00665078	8.95724e-49	logistic	712628	88686	623942	2	0	0	0.0845108	0.771275	na	logTG
HDL_cholesterol	Blood Biomarkers	rs10787429	10	113949664	C	-0.0135728	0.986519	0.000925513	1.07777e-48	linear	508891	NA	NA	2	0	0	0.340522	0.559528	GPAM	nonHDL
Triglycerides	Blood Biomarkers	rs13241165	7	130432538	T	-0.033135	0.967408	0.00226453	1.75148e-48	linear	542070	NA	NA	2	0.00220929	75.0755	4.01211	0.0451746	na	nonHDL
Monocyte_percentage	Blood Biomarkers	rs1260326	2	27730940	C	0.0886233	1.09267	0.00606132	2.05977e-48	linear	530613	NA	NA	2	0	0	0.219722	0.639252	na	HDL,LDL,TC,logTG,nonHDL
BMI	Physical Measures	rs1519480	11	27675712	T	-0.144856	0.865147	0.00990818	2.1003e-48	linear	561637	NA	NA	2	0	0	0.366222	0.545071	LGR4	logTG
Red_blood_cell_erythrocyte_distribution_width	Blood Biomarkers	rs28601761	8	126500031	G	0.0322655	1.03279	0.00220702	2.11076e-48	linear	515547	NA	NA	2	0	0	0.0160225	0.899273	na	LDL,TC,logTG,nonHDL
HbA1c	Blood Biomarkers	rs7748382	6	20665549	G	-0.215938	0.805785	0.0147711	2.12557e-48	linear	504038	NA	NA	2	0.000810728	38.627	1.62938	0.201789	na	logTG
Urea	Blood Biomarkers	rs681343	19	49206462	C	0.0443599	1.04536	0.00303774	2.69007e-48	linear	544352	NA	NA	2	0.0199607	72.1426	3.58971	0.0581384	na	LDL,nonHDL
Eosinophill_count	Blood Biomarkers	rs1264347	6	30798697	T	-0.00646612	0.993555	0.000443137	3.17228e-48	linear	514073	NA	NA	2	0	0	0.214041	0.643619	na	logTG
Mean_corpuscular_volume	Blood Biomarkers	rs5754102	22	21916272	A	-0.187083	0.829375	0.0128253	3.39684e-48	linear	541275	NA	NA	2	0.0143868	53.173	2.13552	0.143922	na	LDL
Triglycerides	Blood Biomarkers	rs17605615	4	87996745	G	-0.0336834	0.966878	0.00230992	3.65283e-48	linear	542544	NA	NA	2	0.000263509	25.6287	1.3446	0.246224	HSD17B11	TC
Mean_platelet_thrombocyte_volume	Blood Biomarkers	rs1047891	2	211540507	A	0.0378474	1.03857	0.00259839	4.642e-48	linear	533561	NA	NA	2	0.00672855	47.139	1.89175	0.169004	na	HDL
Eosinophill_count	Blood Biomarkers	rs2517601	6	30074072	C	-0.00649095	0.99353	0.000446217	6.13759e-48	linear	525983	NA	NA	2	0	0	0.0985687	0.753554	na	logTG
Monocyte_count	Blood Biomarkers	rs3184504	12	111884608	T	0.0070474	1.00707	0.000485974	1.18357e-47	linear	513466	NA	NA	2	0.0105169	65.4226	2.89206	0.0890169	ALDH2	HDL
Type 2 diabetes with ophthalmic manifestations	endocrine/metabolic	rs62033400	16	53811788	A	-0.131253	0.876996	0.00905424	1.27805e-47	logistic	712006	27897	684109	2	0	0	0.074472	0.784933	na	logTG
Triglycerides	Blood Biomarkers	rs10184004	2	165508389	T	-0.0333973	0.967154	0.00230398	1.29435e-47	linear	541932	NA	NA	2	0.00107719	58.8944	2.43276	0.118824	na	LDL,TC,nonHDL
Triglycerides	Blood Biomarkers	rs1495743	8	18273300	C	-0.0392878	0.961474	0.00271129	1.3918e-47	linear	542544	NA	NA	2	0.00165638	61.4966	2.59717	0.107055	na	LDL
Aspartate_aminotransferase	Blood Biomarkers	rs17668357	10	102003906	G	0.327634	1.38768	0.0226157	1.46286e-47	linear	538262	NA	NA	2	0.00782811	70.6152	3.40311	0.0650734	na	TC,nonHDL
Mean_corpuscular_haemoglobin_concentration	Blood Biomarkers	rs3118362	6	28785085	C	0.0577915	1.05949	0.00399052	1.57013e-47	linear	548236	NA	NA	2	0.000222244	0.90402	1.00912	0.315113	TRIM27	LDL,TC,nonHDL
Hyperlipidemia	endocrine/metabolic	rs12916	5	74656539	T	-0.0661973	0.935946	0.00457108	1.57968e-47	logistic	712628	280273	432355	2	5.84456e-05	58.1537	2.3897	0.122137	HMGCR	LDL,TC,nonHDL
Monocyte_count	Blood Biomarkers	rs4947249	6	31302029	G	-0.00738279	0.992644	0.000509811	1.58764e-47	linear	502313	NA	NA	2	0	0	0.269243	0.60384	APOM	HDL
HDL_cholesterol	Blood Biomarkers	rs12443634	16	81524274	C	0.0133703	1.01346	0.000925599	2.69424e-47	linear	501006	NA	NA	2	0.00171312	64.6236	2.82674	0.0927064	CMIP	nonHDL
LDL_cor	Blood Biomarkers	rs838133	19	49259529	G	-0.0299257	0.970518	0.00207171	2.69897e-47	linear	448002	NA	NA	2	0.0981351	88.1712	8.45391	0.0036426	na	logTG
Neutrophill_count	Blood Biomarkers	rs4655772	1	66130398	A	0.0462095	1.04729	0.00319911	2.71616e-47	linear	512554	NA	NA	2	0	0	0.065196	0.798464	LEPR	LDL
Unstable angina (intermediate coronary syndrome)	circulatory system	rs1537373	9	22103341	G	0.139584	1.1498	0.00966732	2.94953e-47	logistic	710910	23510	687400	2	1.3581e-05	5.51966	1.05842	0.303576	na	LDL
LDL_cor	Blood Biomarkers	rs7207542	17	45697549	C	0.0278952	1.02829	0.00193266	3.18016e-47	linear	493899	NA	NA	2	0.0732901	86.0089	7.1474	0.00750727	KPNB1	logTG
Eosinophill_count	Blood Biomarkers	rs11066412	12	113218868	A	0.00501576	1.00503	0.000347871	3.95966e-47	linear	518335	NA	NA	2	0.00960331	60.7839	2.54997	0.110296	PTPN11	LDL,TC
Neutrophill_count	Blood Biomarkers	rs11208700	1	66133443	A	0.0461028	1.04718	0.00319984	4.61925e-47	linear	512663	NA	NA	2	0	0	0.0902684	0.763836	LEPR	TC
Mean_corpuscular_haemoglobin	Blood Biomarkers	rs9379828	6	26167951	G	-0.0602403	0.941538	0.00418187	4.80498e-47	linear	550590	NA	NA	2	0.00107756	12.7521	1.14616	0.284355	HIST1H2BD	logTG
Haemoglobin_concentration	Blood Biomarkers	rs1321505	6	28052823	C	-0.0440336	0.956922	0.00306229	6.9757e-47	linear	550964	NA	NA	2	0.0313089	63.6698	2.75253	0.0971006	ZKSCAN4	HDL
Monocyte_count	Blood Biomarkers	rs653178	12	112007756	C	0.00697266	1.007	0.000485955	1.09106e-46	linear	513466	NA	NA	2	0.0115996	67.6248	3.08878	0.0788337	ALDH2	LDL,TC,nonHDL
HDL_cholesterol	Blood Biomarkers	rs55747707	7	73037366	G	-0.0147328	0.985375	0.00102699	1.13583e-46	linear	508179	NA	NA	2	0.0219073	95.0109	20.0436	7.56966e-06	MLXIPL	HDL
Mean_platelet_thrombocyte_volume	Blood Biomarkers	rs488635	12	123203258	G	0.0423937	1.04331	0.00296255	1.89893e-46	linear	533500	NA	NA	2	0.000672392	6.44818	1.06893	0.301188	PITPNM2	logTG
Red_blood_cell_erythrocyte_count	Blood Biomarkers	rs4449583	5	1284135	T	0.0121167	1.01219	0.000848653	3.02183e-46	linear	543779	NA	NA	2	0.00707257	47.5637	1.90707	0.167289	na	HDL
HDL_cholesterol	Blood Biomarkers	rs488635	12	123203258	G	0.0143844	1.01449	0.00100928	4.34958e-46	linear	509871	NA	NA	2	0	0	0.20383	0.651647	PITPNM2	logTG
Type 2 diabetes	endocrine/metabolic	rs864745	7	28180556	C	-0.0660447	0.936089	0.00463825	5.236e-46	logistic	712628	136891	575737	2	7.46973e-05	58.1023	2.38676	0.122367	na	logTG
TC_cor	Blood Biomarkers	rs4841133	8	9183664	A	-0.0894063	0.914474	0.00627934	5.31045e-46	linear	494586	NA	NA	2	1.11905	96.1155	25.7432	3.89989e-07	TNKS	nonHDL
Monocyte_count	Blood Biomarkers	rs1233393	6	29549653	G	-0.0103032	0.98975	0.000724097	6.04873e-46	linear	513317	NA	NA	2	0	0	0.28693	0.592194	na	logTG
BMI	Physical Measures	rs2307111	5	75003678	T	0.134309	1.14375	0.00944086	6.28639e-46	linear	563664	NA	NA	2	0	0	0.244794	0.620765	na	HDL
Vitamin B-complex deficiencies	endocrine/metabolic	rs11878908	19	49227443	C	0.135701	1.14534	0.00953953	6.39785e-46	logistic	711812	24219	687593	2	0	0	0.598286	0.439233	NUCB1	TC
Peripheral vascular disease, unspecified	circulatory system	rs1537373	9	22103341	G	0.107664	1.11367	0.00757981	8.65063e-46	logistic	710910	42194	668716	2	0.00377113	93.561	15.5304	8.11871e-05	na	LDL
Monocyte_count	Blood Biomarkers	rs2391159	1	92971951	T	0.00850843	1.00854	0.000599112	8.93715e-46	linear	513372	NA	NA	2	0	0	0.355906	0.550789	EVI5	LDL
Unstable angina (intermediate coronary syndrome)	circulatory system	rs1333047	9	22124504	T	0.137312	1.14719	0.00967115	9.41086e-46	logistic	711668	23521	688147	2	4.35535e-05	15.8028	1.18769	0.275796	na	nonHDL
Haemoglobin_concentration	Blood Biomarkers	rs1233393	6	29549653	G	-0.0466844	0.954389	0.00328955	1.03051e-45	linear	550818	NA	NA	2	0	0	0.112843	0.736931	na	logTG
TC_cor	Blood Biomarkers	rs4841132	8	9183596	A	-0.0892717	0.914597	0.00629197	1.08421e-45	linear	494687	NA	NA	2	1.11347	96.0791	25.5043	4.41404e-07	TNKS	HDL,LDL,TC
HbA1c	Blood Biomarkers	rs35365035	19	17252151	T	-0.198922	0.819614	0.0140238	1.1423e-45	linear	504185	NA	NA	2	0.00923887	88.7826	8.91473	0.00282879	MYO9B	TC
Triglycerides	Blood Biomarkers	rs13173241	5	55861359	G	-0.0396627	0.961114	0.00279643	1.16204e-45	linear	542234	NA	NA	2	0.0141115	92.7414	13.7768	0.000205859	na	LDL,TC,logTG,nonHDL
Aspartate_aminotransferase	Blood Biomarkers	rs58542926	19	19379549	T	0.598908	1.82013	0.0422829	1.52365e-45	linear	538796	NA	NA	2	0.163294	94.167	17.1439	3.46515e-05	na	LDL,TC,logTG,nonHDL
Haemoglobin_concentration	Blood Biomarkers	rs2517601	6	30074072	C	-0.0456616	0.955365	0.00322429	1.58047e-45	linear	545899	NA	NA	2	0	0	0.697126	0.403751	na	logTG
Monocyte_count	Blood Biomarkers	rs11164605	1	92946479	G	0.00854002	1.00858	0.000603158	1.64669e-45	linear	509878	NA	NA	2	0	0	0.410799	0.521564	na	nonHDL
Disorders of bilirubin excretion	endocrine/metabolic	rs35203651	2	234679549	T	0.792269	2.2084	0.0559594	1.66844e-45	logistic	712053	3424	708629	2	0.198244	93.4865	15.3528	8.91865e-05	na	LDL,TC,nonHDL
Haematocrit_percentage	Blood Biomarkers	rs760077	1	155178782	A	-0.0938412	0.910427	0.00662842	1.68135e-45	linear	550975	NA	NA	2	0	0	0.480123	0.488367	na	nonHDL
Triglycerides	Blood Biomarkers	rs13234269	7	130429186	A	-0.0322931	0.968223	0.00228214	1.8574e-45	linear	535780	NA	NA	2	0.010686	93.3438	15.0236	0.000106177	na	HDL,logTG
Calcium	Blood Biomarkers	rs12948283	17	1622850	G	-0.00377987	0.996227	0.000267248	2.04293e-45	linear	316512	NA	NA	2	0	0	0.425497	0.514207	RILP	nonHDL
Peripheral vascular disease, unspecified	circulatory system	rs1333047	9	22124504	T	0.107299	1.11327	0.00758892	2.18572e-45	logistic	711668	42200	669468	2	0.00398403	93.8978	16.3874	5.16265e-05	na	nonHDL
Celiac disease	digestive	rs3893464	6	29935250	G	-0.330082	0.718865	0.0233841	3.04143e-45	logistic	712607	3757	708850	2	0.0275318	95.5828	22.6389	1.95485e-06	na	LDL
Red_blood_cell_erythrocyte_count	Blood Biomarkers	rs174564	11	61588305	A	-0.0116671	0.988401	0.0008274	3.74679e-45	linear	549948	NA	NA	2	0.00803706	51.7412	2.07216	0.150009	na	HDL,LDL,TC,logTG,nonHDL
Edema	symptoms	rs17764730	5	127357526	C	-0.107369	0.898194	0.00761713	4.03266e-45	logistic	709506	67531	641975	2	0	0	0.779704	0.377232	na	HDL
Umbilical hernia	digestive	rs2820441	1	219734960	C	0.161257	1.17499	0.0114431	4.24912e-45	logistic	712628	18247	694381	2	0.000620144	67.2683	3.05515	0.0804818	na	logTG
Celiac disease	digestive	rs9379828	6	26167951	G	0.328956	1.38952	0.0233559	4.73133e-45	logistic	712396	3757	708639	2	0.0164622	92.6454	13.5969	0.000226555	HIST1H2BD	logTG
Triglycerides	Blood Biomarkers	rs2068888	10	94839642	A	-0.0320145	0.968493	0.00227374	5.03636e-45	linear	542544	NA	NA	2	7.15189e-05	9.18062	1.10109	0.294028	CYP26A1	LDL
Hypothyroidism NOS	endocrine/metabolic	rs6689	6	32627700	A	0.118047	1.1253	0.00839676	6.81654e-45	logistic	711484	65974	645510	2	1.01445e-05	6.52098	1.06976	0.301	BRD2	nonHDL
Occlusion and stenosis of precerebral arteries	circulatory system	rs10455872	6	161010118	A	-0.228568	0.795672	0.0162744	8.30596e-45	logistic	712628	28080	684548	2	0.00329901	71.3343	3.48849	0.0617971	PLG	LDL,nonHDL
HDL_cholesterol	Blood Biomarkers	rs998584	6	43757896	C	0.0116286	1.0117	0.000828461	9.34216e-45	linear	506207	NA	NA	2	0.00545756	88.3751	8.60222	0.00335753	VEGFA	TC,logTG,nonHDL
HDL_cholesterol	Blood Biomarkers	rs11967262	6	43760327	G	-0.0115699	0.988497	0.000824832	1.0657e-44	linear	508850	NA	NA	2	0.00560554	88.8088	8.93559	0.00279668	VEGFA	HDL
White_blood_cell_leukocyte_count	Blood Biomarkers	rs1265097	6	31106459	C	-0.119642	0.887238	0.00853112	1.10962e-44	linear	540877	NA	NA	2	0.0981743	84.2616	6.35391	0.0117123	PRRC2A	LDL,nonHDL
Essential hypertension	circulatory system	rs880315	1	10796866	C	0.0600414	1.06188	0.00428177	1.13445e-44	logistic	700065	337863	362202	2	0.000258445	87.1447	7.77887	0.00528608	na	TC
Hypercholesterolemia	endocrine/metabolic	rs2980888	8	126507308	T	0.0713845	1.07399	0.00509215	1.20073e-44	logistic	712299	116813	595486	2	0.000355845	87.2546	7.84599	0.00509337	TRIB1	HDL
Neutrophill_count	Blood Biomarkers	rs1260326	2	27730940	C	-0.0453705	0.955643	0.00323657	1.20813e-44	linear	520893	NA	NA	2	0.0299248	83.6667	6.12246	0.0133475	na	HDL,LDL,TC,logTG,nonHDL
LDL_cor	Blood Biomarkers	rs2235215	6	16131156	C	-0.029577	0.970856	0.0021108	1.31269e-44	linear	492079	NA	NA	2	0.000245356	1.89462	1.01931	0.312682	MYLIP	TC,nonHDL
Occlusion and stenosis of precerebral arteries	circulatory system	rs55730499	6	161005610	C	-0.230356	0.794251	0.0164505	1.49461e-44	logistic	712194	28078	684116	2	0.00271519	67.1317	3.04245	0.0811136	IGF2R	TC
Macular degeneration (senile) of retina NOS	sense organs	rs10922179	1	197159347	G	0.223447	1.25038	0.0159592	1.53323e-44	logistic	710216	19407	690809	2	0.0104851	94.9752	19.9012	8.15473e-06	na	TC
Disorders of bilirubin excretion	endocrine/metabolic	rs62192912	2	234144942	C	0.458288	1.58136	0.0327693	1.91758e-44	logistic	699459	3405	696054	2	0.00363276	54.3929	2.19264	0.138671	na	TC
LDL_cor	Blood Biomarkers	rs7746081	6	16126934	A	-0.0295096	0.970922	0.00211058	2.0151e-44	linear	492241	NA	NA	2	0	0	0.807227	0.368941	MYLIP	LDL
Creatinine	Blood Biomarkers	rs4493564	4	77420407	G	0.50321	1.65402	0.0360454	2.71663e-44	linear	542555	NA	NA	2	0.252617	96.2518	26.6793	2.40181e-07	na	LDL
Hematuria	genitourinary	rs2524143	6	31263510	T	-0.104925	0.900392	0.00751865	2.92033e-44	logistic	711244	52275	658969	2	0.000864218	88.0785	8.38818	0.00377668	APOM	TC
Triglycerides	Blood Biomarkers	rs342466	4	88053085	C	-0.0323288	0.968188	0.00231905	3.59437e-44	linear	541705	NA	NA	2	0	0	0.909789	0.34017	AFF1	logTG
Triglycerides	Blood Biomarkers	rs342469	4	88050554	A	0.0322728	1.0328	0.0023187	4.89053e-44	linear	541782	NA	NA	2	0	0	0.917595	0.338107	AFF1	HDL
Red_blood_cell_erythrocyte_distribution_width	Blood Biomarkers	rs2022003	1	158586966	A	-0.0330986	0.967443	0.00237918	5.37308e-44	linear	532664	NA	NA	2	0	0	0.218181	0.640429	SPTA1	LDL,nonHDL
Neutrophill_count	Blood Biomarkers	rs13201681	6	28394680	T	-0.0683086	0.933972	0.0049134	6.117e-44	linear	520854	NA	NA	2	0	0	0.226274	0.6343	TRIM27	logTG
Triglycerides	Blood Biomarkers	rs342467	4	88052219	T	-0.0322322	0.968282	0.00231886	6.33041e-44	linear	541722	NA	NA	2	0	0	0.901014	0.34251	AFF1	LDL
Peripheral vascular disease, unspecified	circulatory system	rs10455872	6	161010118	A	-0.190871	0.826239	0.0137443	7.5647e-44	logistic	712628	42211	670417	2	0.0116688	94.3317	17.642	2.6663e-05	PLG	LDL,nonHDL
CRP	Blood Biomarkers	rs4655772	1	66130398	A	0.135988	1.14567	0.00979843	8.54831e-44	linear	406585	NA	NA	2	0.0111756	89.7932	9.79737	0.00174762	LEPR	LDL
Monocyte_count	Blood Biomarkers	rs896263	16	85927519	C	0.00783566	1.00787	0.000564908	9.53558e-44	linear	507227	NA	NA	2	0	0	0.0148896	0.902881	na	HDL
Peripheral vascular disease, unspecified	circulatory system	rs55730499	6	161005610	C	-0.192364	0.825006	0.0138827	1.16347e-43	logistic	712194	42209	669985	2	0.0110701	94.0297	16.7497	4.26499e-05	IGF2R	TC
HDL_cholesterol	Blood Biomarkers	rs56322906	19	11346155	A	-0.0315295	0.968962	0.00227547	1.16623e-43	linear	509504	NA	NA	2	0	0	0.261869	0.608839	LDLR	HDL
CRP	Blood Biomarkers	rs11208700	1	66133443	A	0.13562	1.14525	0.00979759	1.4178e-43	linear	406704	NA	NA	2	0.0112347	89.8754	9.87691	0.00167365	LEPR	TC
Triglycerides	Blood Biomarkers	rs35753501	7	72330303	C	0.0979834	1.10294	0.007081	1.51386e-43	linear	537999	NA	NA	2	0.175987	88.0822	8.39078	0.0037713	POM121	HDL,logTG
HDL_cholesterol	Blood Biomarkers	rs143376213	18	47632322	T	-0.0687598	0.933551	0.00498397	2.68639e-43	linear	505664	NA	NA	2	0	0	0.0842393	0.771633	na	TC
Triglycerides	Blood Biomarkers	rs4418728	10	94839724	T	-0.0313518	0.969135	0.00227447	3.1709e-43	linear	542113	NA	NA	2	0.00470739	86.7758	7.5619	0.00596149	na	HDL,TC,logTG,nonHDL
Eosinophill_count	Blood Biomarkers	rs2339718	12	111702646	G	-0.00487449	0.995137	0.000353907	3.68655e-43	linear	528690	NA	NA	2	0	0	0.00258296	0.959467	ATXN2	logTG
Diseases of white blood cells	hematopoietic	rs77375493	9	5073770	T	1.95034	7.03109	0.141645	3.90211e-43	logistic	712119	9663	702456	2	0	0	0.00879374	0.925288	JAK2	HDL,TC
Eosinophill_count	Blood Biomarkers	rs9378248	6	31326289	G	-0.00445207	0.995558	0.000323731	4.92686e-43	linear	529299	NA	NA	2	0.0330319	87.7524	8.16483	0.00427104	APOM	logTG
Liver abscess and sequelae of chronic liver disease	digestive	rs738408	22	44324730	T	0.326221	1.38572	0.0237304	5.31124e-43	logistic	712434	4525	707909	2	0	0	0.674222	0.411583	na	HDL,TC,logTG
Mean_corpuscular_volume	Blood Biomarkers	rs2273668	6	109323519	T	-0.205004	0.814644	0.0149136	5.37691e-43	linear	550793	NA	NA	2	0	0	0.68363	0.408339	na	LDL
HbA1c	Blood Biomarkers	rs2519093	9	136141870	C	-0.240718	0.786063	0.0176199	1.71886e-42	linear	503890	NA	NA	2	0	0	0.487541	0.485026	na	HDL,TC,nonHDL
White_blood_cell_leukocyte_count	Blood Biomarkers	rs7776054	6	135418916	G	-0.0715395	0.930959	0.00524051	1.984e-42	linear	539588	NA	NA	2	0	0	0.308369	0.578683	na	LDL,TC,nonHDL
Direct_bilirubin	Blood Biomarkers	rs687339	3	135932359	T	-0.0329655	0.967572	0.00241577	2.13263e-42	linear	423388	NA	NA	2	0	0	0.320009	0.571602	STAG1	HDL,nonHDL
Triglycerides	Blood Biomarkers	rs6874202	5	156391628	T	-0.0320527	0.968455	0.00234978	2.29294e-42	linear	542412	NA	NA	2	0.00222783	74.5658	3.93172	0.0473836	na	LDL,TC,logTG,nonHDL
Calcium	Blood Biomarkers	rs4841132	8	9183596	A	-0.00522633	0.994787	0.00038326	2.4287e-42	linear	376945	NA	NA	2	0	0	0.655376	0.418197	TNKS	HDL,LDL,TC
HbA1c	Blood Biomarkers	rs507666	9	136149399	G	-0.239806	0.78678	0.0176077	3.06994e-42	linear	504185	NA	NA	2	0	0	0.438412	0.50789	na	LDL
Edema	symptoms	rs7734927	5	127453735	T	0.0992177	1.10431	0.00728747	3.26952e-42	logistic	711992	67567	644425	2	0.000195698	37.0007	1.58732	0.207709	SLC12A2	logTG
Red_blood_cell_erythrocyte_count	Blood Biomarkers	rs221793	7	100280896	C	-0.0177411	0.982415	0.00130403	3.74564e-42	linear	546188	NA	NA	2	0	0	0.168696	0.681273	TSC22D4	LDL,TC,nonHDL
Haemoglobin_concentration	Blood Biomarkers	rs1264377	6	30764907	A	-0.038865	0.961881	0.00285741	3.92312e-42	linear	550969	NA	NA	2	0.0276965	65.3736	2.88797	0.0892435	na	HDL
HDL_cholesterol	Blood Biomarkers	rs7964492	12	57823585	A	-0.0130113	0.987073	0.000957234	4.42949e-42	linear	509686	NA	NA	2	4.61155e-05	4.52127	1.04735	0.306117	na	HDL,logTG
Red_blood_cell_erythrocyte_distribution_width	Blood Biomarkers	rs857725	1	158607935	T	-0.0327176	0.967812	0.0024079	4.74327e-42	linear	533750	NA	NA	2	0	0	0.416499	0.518689	SPTA1	TC
Eosinophill_count	Blood Biomarkers	rs1264377	6	30764907	A	-0.00537037	0.994644	0.000395267	4.80306e-42	linear	531040	NA	NA	2	0.0080233	50.0723	2.0029	0.156999	na	HDL
White_blood_cell_leukocyte_count	Blood Biomarkers	rs1938498	1	66098653	T	0.064811	1.06696	0.00477291	5.34102e-42	linear	540811	NA	NA	2	0.0155737	67.2901	3.05718	0.0803812	LEPR	HDL
LDL_cor	Blood Biomarkers	rs10903129	1	25768937	A	-0.0263802	0.973965	0.0019444	6.25792e-42	linear	494153	NA	NA	2	0.0405594	79.3314	4.83825	0.0278351	LDLRAP1	LDL
Calcium	Blood Biomarkers	rs4841133	8	9183664	A	-0.00518543	0.994828	0.000382532	7.34593e-42	linear	376851	NA	NA	2	0	0	0.627092	0.428424	TNKS	nonHDL
Mean_platelet_thrombocyte_volume	Blood Biomarkers	rs11781667	8	145040856	G	0.0342538	1.03485	0.00252886	8.46507e-42	linear	529728	NA	NA	2	0.00406346	35.8019	1.55768	0.212005	na	TC
Total_bilirubin	Blood Biomarkers	rs3184504	12	111884608	T	0.130308	1.13918	0.00962274	8.86931e-42	linear	540620	NA	NA	2	0.00496072	66.1987	2.95846	0.0854292	ALDH2	HDL
Liver abscess and sequelae of chronic liver disease	digestive	rs3747207	22	44324855	A	0.324136	1.38284	0.0239583	1.05165e-41	logistic	711743	4515	707228	2	0	0	0.346593	0.556048	na	LDL,nonHDL
CRP	Blood Biomarkers	rs9616	1	154555733	A	0.14394	1.15482	0.0106489	1.24203e-41	linear	412107	NA	NA	2	0.00628293	79.4812	4.87358	0.0272709	na	HDL
Haematocrit_percentage	Blood Biomarkers	rs6676150	1	155123837	C	-0.0902832	0.913672	0.00668139	1.31705e-41	linear	546543	NA	NA	2	0	0	0.936343	0.33322	na	TC
Mean_corpuscular_volume	Blood Biomarkers	rs11153143	6	109300661	T	-0.199585	0.819071	0.0147705	1.32166e-41	linear	548949	NA	NA	2	0	0	0.489974	0.483939	na	TC
Red_blood_cell_erythrocyte_distribution_width	Blood Biomarkers	rs429358	19	45411941	C	-0.0396701	0.961106	0.00293693	1.41549e-41	linear	533750	NA	NA	2	0	0	0.0308495	0.860576	APOE	HDL
Monocyte_percentage	Blood Biomarkers	rs2391159	1	92971951	T	0.0986614	1.10369	0.00730531	1.45271e-41	linear	530519	NA	NA	2	0	0	0.176714	0.674213	EVI5	LDL
Triglycerides	Blood Biomarkers	rs2982521	6	139835329	T	-0.0316294	0.968866	0.00234255	1.51945e-41	linear	542482	NA	NA	2	0	0	0.00624334	0.937021	na	TC,nonHDL
Macular degeneration (senile) of retina NOS	sense organs	rs12137359	1	197129981	C	0.20858	1.23193	0.0154727	2.03794e-41	logistic	712453	19440	693013	2	0.00703618	92.9486	14.1816	0.000165987	na	LDL
Monocyte_percentage	Blood Biomarkers	rs11164605	1	92946479	G	0.0990618	1.10413	0.00735152	2.19473e-41	linear	527025	NA	NA	2	0	0	0.163855	0.685632	na	nonHDL
Total_bilirubin	Blood Biomarkers	rs653178	12	112007756	C	0.129555	1.13832	0.00962243	2.55174e-41	linear	540620	NA	NA	2	0.00461632	64.5876	2.82387	0.0928721	ALDH2	LDL,TC,nonHDL
Mean_corpuscular_haemoglobin	Blood Biomarkers	rs4449583	5	1284135	T	-0.0585781	0.943105	0.00435226	2.71757e-41	linear	543908	NA	NA	2	0.0199618	71.6195	3.52355	0.0605029	na	HDL
BMI	Physical Measures	rs11925192	3	50038664	A	0.12504	1.13319	0.00929169	2.79304e-41	linear	563637	NA	NA	2	0.00171893	87.3249	7.88947	0.00497234	na	HDL
Monocyte_count	Blood Biomarkers	rs3893464	6	29935250	G	0.00653567	1.00656	0.000485842	2.98599e-41	linear	513448	NA	NA	2	0	0	0.349712	0.554276	na	LDL
HbA1c	Blood Biomarkers	rs34265667	8	41542093	A	-0.506461	0.602624	0.0376749	3.3881e-41	linear	504185	NA	NA	2	0.246297	96.2772	26.8615	2.18565e-07	ANK1	TC
Red_blood_cell_erythrocyte_distribution_width	Blood Biomarkers	rs4946955	6	109639710	G	0.0315293	1.03203	0.00234577	3.48055e-41	linear	522909	NA	NA	2	0.000565352	6.79116	1.07286	0.3003	na	HDL
Heart valve replaced	circulatory system	rs10455872	6	161010118	A	-0.339148	0.712377	0.0252394	3.65899e-41	logistic	712628	9400	703228	2	0.00424553	74.1265	3.86496	0.0493045	PLG	LDL,nonHDL
Neutrophill_percentage	Blood Biomarkers	rs10892870	11	122517803	A	0.256492	1.29239	0.0190933	3.84386e-41	linear	514986	NA	NA	2	0.0265854	81.0958	5.28984	0.0214502	na	HDL
Triglycerides	Blood Biomarkers	rs635769	6	139831981	C	-0.0314542	0.969035	0.00234282	4.2723e-41	linear	542335	NA	NA	2	0	0	0.00296037	0.956609	na	LDL
LDL_cor	Blood Biomarkers	rs9438905	1	25764177	A	-0.0261613	0.974178	0.00194871	4.3179e-41	linear	492429	NA	NA	2	0.041456	79.3174	4.83498	0.0278879	LDLRAP1	nonHDL
Hypertension	circulatory system	rs1275979	2	26923568	T	0.0713535	1.07396	0.00532341	5.75037e-41	logistic	710074	113816	596258	2	0	0	0.0515396	0.820406	na	LDL
Gout	endocrine/metabolic	rs1171615	10	61469090	C	-0.133414	0.875103	0.00996156	6.65366e-41	logistic	711203	35889	675314	2	0	0	0.146717	0.701693	na	logTG
Mean_corpuscular_volume	Blood Biomarkers	rs9378248	6	31326289	G	0.137919	1.14788	0.0102998	6.87103e-41	linear	549052	NA	NA	2	0.105562	93.5513	15.5071	8.2197e-05	APOM	logTG
Phlebitis and thrombophlebitis of lower extremities	circulatory system	rs507666	9	136149399	G	-0.317711	0.727813	0.0237281	6.95295e-41	logistic	712628	4872	707756	2	0	0	0.259189	0.610678	na	LDL
LDL_cor	Blood Biomarkers	rs6102309	20	39856080	A	-0.0280741	0.972316	0.00209703	7.14531e-41	linear	493533	NA	NA	2	0	0	0.519352	0.471118	PLCG1	logTG
Memory loss	mental disorders	rs483082	19	45416178	G	-0.160625	0.851611	0.0120171	9.51058e-41	logistic	710112	20852	689260	2	0	0	0.233419	0.629	APOE	logTG
Direct_bilirubin	Blood Biomarkers	rs684773	3	135956305	A	0.0319602	1.03248	0.00239203	1.02038e-40	linear	424476	NA	NA	2	0.00181245	43.9099	1.78285	0.1818	STAG1	logTG
Phlebitis and thrombophlebitis of lower extremities	circulatory system	rs2519093	9	136141870	C	-0.317191	0.728191	0.0237563	1.15488e-40	logistic	712322	4869	707453	2	0	0	0.237294	0.626168	na	HDL,TC,nonHDL
LDL_cor	Blood Biomarkers	rs11802413	1	25760920	C	-0.0260184	0.974317	0.00195003	1.30917e-40	linear	491934	NA	NA	2	0.043477	80.0759	5.01905	0.0250699	LDLRAP1	TC
HDL_cholesterol	Blood Biomarkers	rs881844	17	37810218	C	-0.0116186	0.988449	0.000872637	1.90994e-40	linear	509333	NA	NA	2	0.000565825	41.5548	1.711	0.190855	na	HDL
Abdominal aortic aneurysm	circulatory system	rs1537373	9	22103341	G	0.156058	1.16889	0.0117221	1.94197e-40	logistic	710910	16252	694658	2	0.00309907	83.1771	5.94429	0.0147651	na	LDL
BMI	Physical Measures	rs3814883	16	29994922	T	0.125316	1.13351	0.00941446	1.99721e-40	linear	558159	NA	NA	2	0	0	0.0274073	0.86851	na	HDL
Open-angle glaucoma	sense organs	rs738722	22	29130012	T	-0.112471	0.893624	0.00845061	2.04772e-40	logistic	712628	42518	670110	2	0.0025281	81.865	5.51421	0.0188626	na	logTG
Eosinophill_count	Blood Biomarkers	rs13201681	6	28394680	T	-0.00630084	0.993719	0.000474376	2.93029e-40	linear	531001	NA	NA	2	0	0	0.122412	0.726433	TRIM27	logTG
Heart valve replaced	circulatory system	rs55730499	6	161005610	C	-0.338085	0.713134	0.0254669	3.21243e-40	logistic	712194	9398	702796	2	0.00486075	76.4875	4.25306	0.0391796	IGF2R	TC
Open-angle glaucoma	sense organs	rs1033667	22	29130300	T	-0.117658	0.889	0.00886523	3.37374e-40	logistic	712469	42517	669952	2	0.00300686	84.1888	6.32463	0.0119072	TTC28	nonHDL
LDL_cor	Blood Biomarkers	rs1801689	17	64210580	A	-0.0754467	0.927329	0.00568814	3.75008e-40	linear	494153	NA	NA	2	0.722028	89.666	9.67684	0.00186605	APOH	LDL,logTG
HDL_cholesterol	Blood Biomarkers	rs6467314	7	130442141	C	0.0118508	1.01192	0.000893778	3.98776e-40	linear	504987	NA	NA	2	0.00783736	89.994	9.99404	0.00157047	na	LDL
HDL_cholesterol	Blood Biomarkers	rs55707100	15	43820717	T	-0.0349271	0.965676	0.00263785	5.10534e-40	linear	509923	NA	NA	2	0.00641427	51.3433	2.05522	0.151686	na	HDL
Ankylosing spondylitis	musculoskeletal	rs9378248	6	31326289	G	0.452153	1.57169	0.034169	5.67046e-40	logistic	710830	2190	708640	2	0.00703885	69.7258	3.30314	0.0691476	APOM	logTG
Type 2 diabetes	endocrine/metabolic	rs13389219	2	165528876	T	-0.0629692	0.938972	0.00476294	6.66647e-40	logistic	712468	136876	575592	2	5.85059e-05	50.6409	2.02597	0.15463	na	logTG
Triglycerides	Blood Biomarkers	rs10761750	10	65128619	G	0.0299872	1.03044	0.00226934	7.27859e-40	linear	542466	NA	NA	2	0	0	0.174725	0.675946	JMJD1C	LDL
Calcium	Blood Biomarkers	rs139974673	15	44027885	T	-0.00936992	0.990674	0.000709102	7.30566e-40	linear	376619	NA	NA	2	0	0	0.00833916	0.927239	TP53BP1	logTG,nonHDL
Type 2 diabetes	endocrine/metabolic	rs10184004	2	165508389	T	-0.0634949	0.938479	0.00480699	7.80042e-40	logistic	711987	136861	575126	2	4.94727e-05	46.459	1.86773	0.171736	na	LDL,TC,nonHDL
Abdominal aortic aneurysm	circulatory system	rs1333047	9	22124504	T	0.154861	1.1675	0.0117326	8.86617e-40	logistic	711668	16254	695414	2	0.00365395	85.387	6.84324	0.00889772	na	nonHDL
Hypertension	circulatory system	rs1275984	2	26911509	A	0.0703966	1.07293	0.00533745	1.01265e-39	logistic	708197	113267	594930	2	0	0	0.0516254	0.820259	na	TC
HDL_cholesterol	Blood Biomarkers	rs12313762	12	57692470	T	0.0126503	1.01273	0.000959451	1.07106e-39	linear	509612	NA	NA	2	0.000699805	41.1532	1.69933	0.192376	na	nonHDL
White_blood_cell_leukocyte_count	Blood Biomarkers	rs3893464	6	29935250	G	0.060798	1.06268	0.00461261	1.13171e-39	linear	540859	NA	NA	2	0	0	0.355131	0.551223	na	LDL
LDL_cor	Blood Biomarkers	rs8178824	17	64224775	C	-0.0754463	0.92733	0.00572745	1.25905e-39	linear	493765	NA	NA	2	0.519348	85.7196	7.00259	0.00813919	APOH	TC,nonHDL
HDL_cholesterol	Blood Biomarkers	rs1716393	12	124560456	G	0.0110562	1.01112	0.000839536	1.31635e-39	linear	508709	NA	NA	2	0.00209381	73.5954	3.78722	0.0516455	na	LDL
Albumin	Blood Biomarkers	rs7638903	3	12383714	A	-0.122254	0.884924	0.00928699	1.4144e-39	linear	504814	NA	NA	2	0	0	0.367955	0.544121	PPARG	logTG
Glucose	Blood Biomarkers	rs11708067	3	123065778	G	-0.0433314	0.957594	0.00329701	1.8761e-39	linear	362053	NA	NA	2	0	0	0.272738	0.601501	ADCY5	HDL
Sleep apnea	neurological	rs56094641	16	53806453	G	0.0732931	1.07605	0.00557926	2.02856e-39	logistic	712424	91613	620811	2	0.00015937	50.059	2.00236	0.157054	na	HDL
Triglycerides	Blood Biomarkers	rs7924036	10	65191645	T	-0.029728	0.97071	0.00226597	2.55316e-39	linear	542402	NA	NA	2	0	0	0.0884204	0.766195	JMJD1C	logTG
Hypertension	circulatory system	rs13394970	2	26929282	T	0.0696242	1.07211	0.00531531	3.34527e-39	logistic	709223	113595	595628	2	0	0	0.284938	0.593482	PREB	nonHDL
Haemoglobin_concentration	Blood Biomarkers	rs9379828	6	26167951	G	-0.0299174	0.970526	0.00228409	3.37158e-39	linear	550744	NA	NA	2	0.00783047	47.5242	1.90564	0.167448	HIST1H2BD	logTG
Mean_corpuscular_haemoglobin	Blood Biomarkers	rs221793	7	100280896	C	0.0873867	1.09132	0.00667255	3.45089e-39	linear	546317	NA	NA	2	0	0	7.88721e-06	0.997759	TSC22D4	LDL,TC,nonHDL
Triglycerides	Blood Biomarkers	rs2925979	16	81534790	T	0.0323216	1.03285	0.00246852	3.58615e-39	linear	542544	NA	NA	2	0.00561322	87.0135	7.70032	0.0055211	CMIP	HDL,logTG
Mean_corpuscular_haemoglobin_concentration	Blood Biomarkers	rs181058325	6	25314597	G	0.0599217	1.06175	0.00458342	4.66144e-39	linear	544440	NA	NA	2	0.0322784	51.1823	2.04844	0.152363	na	LDL,TC,nonHDL
HDL_cholesterol	Blood Biomarkers	rs12450500	17	76395750	T	0.011006	1.01107	0.000842309	5.1175e-39	linear	509555	NA	NA	2	0	0	0.390968	0.531791	na	logTG
Eosinophill_count	Blood Biomarkers	rs7758845	6	135428537	C	-0.00448009	0.99553	0.000342993	5.44523e-39	linear	529762	NA	NA	2	0	0	0.0175574	0.894585	na	HDL
Mean_corpuscular_volume	Blood Biomarkers	rs11711179	3	142159885	A	-0.187068	0.829387	0.0143263	5.74876e-39	linear	550670	NA	NA	2	0.00746823	33.4997	1.50375	0.220095	na	LDL
HDL_cholesterol	Blood Biomarkers	rs58301047	8	144296480	G	-0.0138394	0.986256	0.00106011	5.96932e-39	linear	509574	NA	NA	2	0	0	0.0988395	0.753227	na	HDL
Calcium	Blood Biomarkers	rs112771035	11	126225876	G	-0.00557469	0.994441	0.000427134	6.23984e-39	linear	376522	NA	NA	2	0	0	0.00804857	0.928515	TIRAP	HDL,LDL,nonHDL
Triglycerides	Blood Biomarkers	rs247617	16	56990716	A	-0.0315952	0.968899	0.00242118	6.39665e-39	linear	542544	NA	NA	2	0	0	0.175606	0.675177	CETP	LDL,logTG
Creatinine	Blood Biomarkers	rs1260326	2	27730940	C	0.458532	1.58175	0.0351428	6.55162e-39	linear	544796	NA	NA	2	0.0790548	89.7237	9.73117	0.00181169	na	HDL,LDL,TC,logTG,nonHDL
Calcium	Blood Biomarkers	rs13107325	4	103188709	C	0.00548555	1.0055	0.000421294	9.32924e-39	linear	376945	NA	NA	2	0	0	0.905551	0.341298	na	HDL,LDL,TC,logTG
Albumin	Blood Biomarkers	rs13107325	4	103188709	C	0.150459	1.16237	0.0115563	9.468e-39	linear	505330	NA	NA	2	0.0369289	77.7905	4.50258	0.0338437	na	HDL,LDL,TC,logTG
Glucose	Blood Biomarkers	rs11719201	3	123068744	T	-0.0428007	0.958102	0.00328748	9.50248e-39	linear	360595	NA	NA	2	0	0	0.150996	0.697585	na	LDL,TC
HDL_cholesterol	Blood Biomarkers	rs16971107	17	76394042	G	-0.010956	0.989104	0.000842253	1.10233e-38	linear	509733	NA	NA	2	0	0	0.391241	0.531648	na	HDL
LDL_cor	Blood Biomarkers	rs2740488	9	107661742	C	-0.028524	0.971879	0.00219891	1.76677e-38	linear	492259	NA	NA	2	0.00442312	23.3977	1.30544	0.253221	ABCA1	HDL,TC,nonHDL
Neutrophill_percentage	Blood Biomarkers	rs7129071	11	122527120	G	0.249618	1.28353	0.0192486	1.85644e-38	linear	516123	NA	NA	2	0.0297989	82.3487	5.66532	0.0173036	na	nonHDL
Neutrophill_percentage	Blood Biomarkers	rs7930518	11	122523596	G	0.248597	1.28223	0.0191729	1.90467e-38	linear	515955	NA	NA	2	0.0297372	82.3329	5.66025	0.0173537	na	LDL,TC
LDL_cor	Blood Biomarkers	rs1265097	6	31106459	C	-0.0462219	0.95483	0.00357762	3.48378e-38	linear	494153	NA	NA	2	0.0216284	44.174	1.79128	0.18077	PRRC2A	LDL,nonHDL
Triglycerides	Blood Biomarkers	rs7916868	10	64988931	A	0.0293023	1.02974	0.00226836	3.57084e-38	linear	541509	NA	NA	2	0	0	0.0310794	0.860063	JMJD1C	HDL
White_blood_cell_leukocyte_count	Blood Biomarkers	rs7758845	6	135428537	C	-0.0669417	0.93525	0.00518312	3.68921e-38	linear	539596	NA	NA	2	0	0	0.0269101	0.869697	na	HDL
HDL_cholesterol	Blood Biomarkers	rs13389219	2	165528876	T	0.0108713	1.01093	0.000842387	4.19978e-38	linear	509777	NA	NA	2	0.00476768	87.0243	7.7067	0.00550162	na	logTG
Neutrophill_count	Blood Biomarkers	rs7924036	10	65191645	T	-0.0408378	0.959985	0.00316493	4.31596e-38	linear	520747	NA	NA	2	0	0	0.832858	0.361447	JMJD1C	logTG
HDL_cholesterol	Blood Biomarkers	rs139974673	15	44027885	T	0.0340716	1.03466	0.00264424	5.45e-38	linear	509597	NA	NA	2	0.00708058	52.3648	2.09929	0.147368	TP53BP1	logTG,nonHDL
Other non-epithelial cancer of skin	neoplasms	rs35282906	6	32657201	T	-0.126199	0.88144	0.00979688	5.72041e-38	logistic	712598	60125	652473	2	0.00123866	80.899	5.23532	0.0221328	BRD2	LDL
Neutrophill_count	Blood Biomarkers	rs10761750	10	65128619	G	0.0408207	1.04167	0.00316929	5.82569e-38	linear	520813	NA	NA	2	0	0	0.995838	0.31832	JMJD1C	LDL
Triglycerides	Blood Biomarkers	rs183130	16	56991363	C	0.0311627	1.03165	0.00242044	6.23877e-38	linear	542123	NA	NA	2	0.00239805	74.9881	3.99809	0.0455518	CETP	HDL,TC,nonHDL
BMI	Physical Measures	rs7187333	16	28865916	A	0.121667	1.12938	0.00945326	6.60528e-38	linear	563545	NA	NA	2	0	0	0.00596527	0.938436	ATXN2L	HDL
White_blood_cell_leukocyte_count	Blood Biomarkers	rs4795393	17	37893484	C	0.0620741	1.06404	0.00482399	6.83327e-38	linear	534926	NA	NA	2	0.00240205	23.7086	1.31076	0.252256	MED1	TC
Direct_bilirubin	Blood Biomarkers	rs1711171	3	136020541	T	0.0302158	1.03068	0.00234823	6.86053e-38	linear	422186	NA	NA	2	0.000230099	11.1678	1.12572	0.288691	STAG1	LDL
Sleep apnea	neurological	rs62033400	16	53811788	A	-0.0718279	0.930691	0.00558409	7.275e-38	logistic	712006	91600	620406	2	4.33554e-05	21.2939	1.27055	0.259664	na	logTG
Triglycerides	Blood Biomarkers	rs622871	6	31878495	A	-0.0315783	0.968915	0.00245544	7.50504e-38	linear	534364	NA	NA	2	0.00483381	84.3766	6.40064	0.0114079	APOM	logTG
Red_blood_cell_erythrocyte_distribution_width	Blood Biomarkers	rs12601110	17	27035335	G	-0.0486336	0.95253	0.00378172	7.5408e-38	linear	533741	NA	NA	2	0	0	0.0890835	0.765346	TRAF4	TC
Triglycerides	Blood Biomarkers	rs17585887	6	139835498	T	0.0295533	1.02999	0.00230024	8.83934e-38	linear	542507	NA	NA	2	0.00125431	62.6972	2.68077	0.101567	CITED2	HDL,logTG
LDL_cor	Blood Biomarkers	rs2642438	1	220970028	A	-0.0271561	0.973209	0.00211371	8.87495e-38	linear	494153	NA	NA	2	0.0113562	47.2604	1.89611	0.168515	HLX	HDL,LDL,TC,logTG,nonHDL
Other non-epithelial cancer of skin	neoplasms	rs2349075	2	202223566	A	0.0861675	1.08999	0.00671262	1.02204e-37	logistic	712195	60112	652083	2	0.000354986	71.4149	3.49832	0.061431	na	TC
BMI	Physical Measures	rs2238435	16	4014282	G	0.122346	1.13014	0.00955276	1.49052e-37	linear	560841	NA	NA	2	0.000353967	57.5634	2.35645	0.124765	na	HDL
Coronary atherosclerosis	circulatory system	rs2297359	6	160492613	T	-0.249122	0.779485	0.0194936	2.12977e-37	logistic	712288	123302	588986	2	0.0157343	95.1289	20.5293	5.87247e-06	IGF2R	LDL
Eosinophill_count	Blood Biomarkers	rs7776054	6	135418916	G	-0.0044444	0.995565	0.000347892	2.25411e-37	linear	529753	NA	NA	2	0	0	0.206855	0.649243	na	LDL,TC,nonHDL
Triglycerides	Blood Biomarkers	rs12443634	16	81524274	C	-0.0325254	0.967998	0.00254694	2.39942e-37	linear	532771	NA	NA	2	0	0	0.513955	0.473432	CMIP	nonHDL
Neutrophill_count	Blood Biomarkers	rs7916868	10	64988931	A	0.0404405	1.04127	0.00316791	2.54961e-37	linear	519844	NA	NA	2	0	0	0.684942	0.40789	JMJD1C	HDL
Red_blood_cell_erythrocyte_distribution_width	Blood Biomarkers	rs1321505	6	28052823	C	0.0377317	1.03845	0.00295706	2.74696e-37	linear	533745	NA	NA	2	0	0	0.759721	0.383416	ZKSCAN4	HDL
Other non-epithelial cancer of skin	neoplasms	rs62247166	3	71532738	C	-0.0830115	0.920341	0.00650651	2.80507e-37	logistic	711276	60089	651187	2	8.58078e-05	38.4578	1.6249	0.20241	FOXP1	HDL
CRP	Blood Biomarkers	rs55709272	2	113867288	C	0.124756	1.13287	0.00978146	2.94996e-37	linear	411488	NA	NA	2	0.0013903	54.0959	2.17845	0.139955	na	logTG
Mean_corpuscular_haemoglobin	Blood Biomarkers	rs34054295	19	4478062	G	0.0532052	1.05465	0.00417271	3.08689e-37	linear	548995	NA	NA	2	0	0	0.170791	0.67941	na	LDL,TC,nonHDL
Coronary atherosclerosis	circulatory system	rs73015024	19	11197598	T	-0.0987931	0.90593	0.00774965	3.19531e-37	logistic	712293	123300	588993	2	0.000317706	68.4954	3.17414	0.0748128	LDLR	LDL,TC,nonHDL
Haemoglobin_concentration	Blood Biomarkers	rs1264347	6	30798697	T	-0.040928	0.959898	0.0032148	3.96988e-37	linear	533980	NA	NA	2	0.0437043	69.435	3.27172	0.0704838	na	logTG
Other anemias	hematopoietic	rs855791	22	37462936	G	-0.0686308	0.933671	0.00539354	4.31432e-37	logistic	704096	87767	616329	2	0	0	0.302309	0.582439	na	LDL
Calcium	Blood Biomarkers	rs55707100	15	43820717	T	0.00898485	1.00903	0.000707466	5.90951e-37	linear	376945	NA	NA	2	0	0	0.00326481	0.954435	na	HDL
HDL_cholesterol	Blood Biomarkers	rs10184004	2	165508389	T	0.0106349	1.01069	0.000838196	6.90063e-37	linear	509372	NA	NA	2	0.00480565	86.766	7.55629	0.00598009	na	LDL,TC,nonHDL
CRP	Blood Biomarkers	rs7412	19	45412079	T	0.224009	1.25108	0.0176981	1.02018e-36	linear	414734	NA	NA	2	0.039635	91.391	11.6158	0.000653952	APOE	LDL,TC,nonHDL
Urea	Blood Biomarkers	rs2800708	6	127437617	T	0.0384915	1.03924	0.00304152	1.04522e-36	linear	542823	NA	NA	2	0	0	0.0362904	0.848917	na	HDL
Monocyte_count	Blood Biomarkers	rs13201681	6	28394680	T	-0.00955119	0.990494	0.000754786	1.0608e-36	linear	513427	NA	NA	2	0	0	0.775157	0.378627	TRIM27	logTG
Haemoglobin_concentration	Blood Biomarkers	rs174564	11	61588305	A	-0.0292834	0.971141	0.00231526	1.14699e-36	linear	550231	NA	NA	2	0.0050757	36.2729	1.56919	0.210324	na	HDL,LDL,TC,logTG,nonHDL
Eosinophill_count	Blood Biomarkers	rs137859889	5	141542219	G	0.00429792	1.00431	0.000339969	1.23718e-36	linear	524346	NA	NA	2	0	0	0.109334	0.740903	na	HDL
Unstable angina (intermediate coronary syndrome)	circulatory system	rs10757273	9	22090301	A	0.127922	1.13646	0.0101191	1.2431e-36	logistic	686968	23100	663868	2	0	0	0.778437	0.37762	na	TC
Multiple sclerosis	neurological	rs3128759	6	31885930	C	0.285797	1.33082	0.0226103	1.26866e-36	logistic	711035	4120	706915	2	0.00633303	85.8251	7.0547	0.00790575	APOM	LDL,TC,nonHDL
White_blood_cell_leukocyte_count	Blood Biomarkers	rs55709272	2	113867288	C	0.0588097	1.06057	0.00465367	1.31534e-36	linear	537545	NA	NA	2	0	0	0.102581	0.748754	na	logTG
HDL_cholesterol	Blood Biomarkers	rs75265117	2	165518799	C	-0.0160603	0.984068	0.00127201	1.51971e-36	linear	509387	NA	NA	2	0.00733404	79.5258	4.88421	0.0271035	COBLL1	HDL
LDL_cor	Blood Biomarkers	rs78425119	6	160501825	G	-0.0481261	0.953014	0.00381522	1.76226e-36	linear	494153	NA	NA	2	0.202869	82.2897	5.64642	0.0174911	IGF2R	HDL,TC,logTG,nonHDL
Triglycerides	Blood Biomarkers	rs2524143	6	31263510	T	-0.0311049	0.969374	0.0024664	1.82528e-36	linear	541231	NA	NA	2	0.00637839	87.2982	7.87291	0.00501808	APOM	TC
Hypothyroidism NOS	endocrine/metabolic	rs1264347	6	30798697	T	0.110719	1.11708	0.00878102	1.88601e-36	logistic	695156	65056	630100	2	0.00110133	87.2842	7.86421	0.00504229	na	logTG
Mean_platelet_thrombocyte_volume	Blood Biomarkers	rs1134030	8	145051484	C	0.031954	1.03247	0.00253563	2.05858e-36	linear	523609	NA	NA	2	0.00345145	32.3917	1.47911	0.223914	na	LDL,nonHDL
CRP	Blood Biomarkers	rs6734238	2	113841030	G	0.123922	1.13193	0.0098377	2.20242e-36	linear	414734	NA	NA	2	0.00190014	62.0848	2.63747	0.10437	na	LDL,TC
Triglycerides	Blood Biomarkers	rs9657541	8	10643164	T	0.0354962	1.03613	0.00281853	2.28235e-36	linear	542544	NA	NA	2	0.00103022	48.4285	1.93905	0.163771	na	HDL,logTG
Mean_platelet_thrombocyte_volume	Blood Biomarkers	rs2455850	3	15782711	A	0.0325405	1.03308	0.00258431	2.34974e-36	linear	533125	NA	NA	2	0	0	0.164812	0.684764	ANKRD28	HDL
Other non-epithelial cancer of skin	neoplasms	rs10810657	9	16884586	A	0.0846652	1.08835	0.00674524	3.88383e-36	logistic	702343	59885	642458	2	9.81178e-05	39.3227	1.64806	0.199223	na	nonHDL
HDL_cholesterol	Blood Biomarkers	rs72691637	8	144306970	A	0.0136123	1.01371	0.00108477	4.04665e-36	linear	497830	NA	NA	2	0	0	0.000206036	0.988548	na	logTG
Haematocrit_percentage	Blood Biomarkers	rs13201681	6	28394680	T	-0.126473	0.881198	0.0100811	4.20168e-36	linear	550936	NA	NA	2	0	0	0.989173	0.319945	TRIM27	logTG
Hypertension	circulatory system	rs880315	1	10796866	C	0.0693207	1.07178	0.00552588	4.24781e-36	logistic	700065	110939	589126	2	0	0	0.359672	0.548688	na	TC
HDL_cholesterol	Blood Biomarkers	rs11657987	17	76387363	G	-0.0105274	0.989528	0.000839573	4.56803e-36	linear	496445	NA	NA	2	0.000260731	26.6065	1.36252	0.243102	na	LDL,TC,nonHDL
Gout	endocrine/metabolic	rs12313762	12	57692470	T	-0.122859	0.884388	0.00979872	4.60877e-36	logistic	712271	35901	676370	2	0	0	0.192401	0.660926	na	nonHDL
BMI	Physical Measures	rs1516725	3	185824004	T	-0.170206	0.843491	0.0135766	4.70171e-36	linear	561978	NA	NA	2	0.0013186	71.2102	3.47345	0.062361	ETV5	HDL
Umbilical hernia	digestive	rs2820468	1	219673705	A	0.141212	1.15167	0.0112677	4.95922e-36	logistic	710900	18207	692693	2	0.000325917	52.5306	2.10662	0.146663	na	nonHDL
Neutrophill_count	Blood Biomarkers	rs1264377	6	30764907	A	-0.0513073	0.949987	0.00409401	4.97236e-36	linear	520893	NA	NA	2	0.0139877	57.1455	2.33348	0.126619	na	HDL
Other non-epithelial cancer of skin	neoplasms	rs28498684	9	16900695	G	0.0843925	1.08806	0.00674015	5.74099e-36	logistic	708536	60023	648513	2	0.000110755	42.7477	1.74665	0.186298	na	LDL,TC
LDL_cor	Blood Biomarkers	rs1883025	9	107664301	T	-0.0278156	0.972568	0.00222247	6.13172e-36	linear	494153	NA	NA	2	0.00085189	5.83017	1.06191	0.30278	ABCA1	LDL
Peripheral vascular disease, unspecified	circulatory system	rs10757273	9	22090301	A	0.0996379	1.10477	0.00796354	6.43849e-36	logistic	686968	41906	645062	2	0.00314763	91.9099	12.3607	0.000438456	na	TC
Triglycerides	Blood Biomarkers	rs13108218	4	3443931	G	-0.0296528	0.970782	0.002371	6.88064e-36	linear	530417	NA	NA	2	0.00910177	91.7877	12.1768	0.000483874	LRPAP1	LDL,TC,logTG,nonHDL
Essential hypertension	circulatory system	rs3184504	12	111884608	T	0.0502113	1.05149	0.00402788	1.14514e-35	logistic	712628	341454	371174	2	0	0	0.254865	0.61367	ALDH2	HDL
Triglycerides	Blood Biomarkers	rs465002	5	55808475	T	0.0323551	1.03288	0.00259724	1.27293e-35	linear	542384	NA	NA	2	0.00162752	62.419	2.66092	0.102841	na	HDL
LDL_cor	Blood Biomarkers	rs114165349	1	27021913	G	-0.0804577	0.922694	0.00645979	1.31094e-35	linear	493408	NA	NA	2	0	0	0.506034	0.476861	NR0B2	LDL,TC,logTG,nonHDL
BMI	Physical Measures	rs17770336	9	28414625	C	-0.123031	0.884236	0.00989053	1.59915e-35	linear	563522	NA	NA	2	0	0	0.00061089	0.980281	na	logTG
Eosinophill_percentage	Blood Biomarkers	rs3893464	6	29935250	G	0.0513188	1.05266	0.00412651	1.65923e-35	linear	541018	NA	NA	2	0	0	0.0219435	0.882238	na	LDL
BMI	Physical Measures	rs9844949	3	185820283	A	-0.168386	0.845027	0.0135553	1.97998e-35	linear	562053	NA	NA	2	0.000890818	62.8158	2.68932	0.101023	na	TC
Neutrophill_count	Blood Biomarkers	rs2586116	17	38505824	G	0.0446678	1.04568	0.00359753	2.13299e-35	linear	520893	NA	NA	2	0	0	0.0741355	0.785408	na	HDL
Alanine_aminotransferase	Blood Biomarkers	rs2642438	1	220970028	A	-0.384121	0.681049	0.0309506	2.28438e-35	linear	543580	NA	NA	2	0.103681	96.6868	30.1821	3.93316e-08	HLX	HDL,LDL,TC,logTG,nonHDL
Haemoglobin_concentration	Blood Biomarkers	rs760077	1	155178782	A	-0.0279911	0.972397	0.00225564	2.32388e-35	linear	550969	NA	NA	2	0.00885709	51.5178	2.06261	0.150951	na	nonHDL
Open-angle glaucoma	sense organs	rs1537373	9	22103341	G	0.0939512	1.09851	0.00757803	2.68447e-35	logistic	710910	42505	668405	2	0.00490405	91.3029	11.4981	0.000696677	na	LDL
HDL_cholesterol	Blood Biomarkers	rs2494747	14	105258437	T	-0.0105476	0.989508	0.000850815	2.71177e-35	linear	506621	NA	NA	2	0.0051041	86.5819	7.45262	0.00633441	AKT1	HDL
Mean_corpuscular_volume	Blood Biomarkers	rs9379828	6	26167951	G	-0.124624	0.882829	0.0100559	2.84698e-35	linear	550568	NA	NA	2	0	0	0.396096	0.529112	HIST1H2BD	logTG
HbA1c	Blood Biomarkers	rs9410381	9	91454519	T	-0.356237	0.700307	0.0287486	2.90725e-35	linear	502849	NA	NA	2	0.0394483	88.4082	8.62681	0.00331251	na	TC
Urea	Blood Biomarkers	rs1047891	2	211540507	A	-0.0403454	0.960458	0.00325721	3.09312e-35	linear	544352	NA	NA	2	0.0291677	76.5897	4.27162	0.0387539	na	HDL
Mean_platelet_thrombocyte_volume	Blood Biomarkers	rs11878908	19	49227443	C	0.0300648	1.03052	0.00242932	3.53195e-35	linear	532769	NA	NA	2	0.0274945	80.6516	5.16838	0.0230016	NUCB1	TC
Mean_corpuscular_volume	Blood Biomarkers	rs73238159	3	142078759	T	-0.17867	0.836382	0.0144428	3.7587e-35	linear	550793	NA	NA	2	0	0	0.92789	0.335412	na	TC,logTG
Haemoglobin_concentration	Blood Biomarkers	rs342466	4	88053085	C	0.0279304	1.02832	0.0022604	4.49866e-35	linear	550119	NA	NA	2	0.00782065	47.3235	1.89838	0.16826	AFF1	logTG
Haemoglobin_concentration	Blood Biomarkers	rs342469	4	88050554	A	-0.0279038	0.972482	0.00226002	5.07667e-35	linear	550199	NA	NA	2	0.00504701	36.7857	1.58192	0.208484	AFF1	HDL
Haemoglobin_concentration	Blood Biomarkers	rs342467	4	88052219	T	0.0278893	1.02828	0.00226013	5.53789e-35	linear	550137	NA	NA	2	0.00534467	38.1071	1.61569	0.203693	AFF1	LDL
Mean_corpuscular_volume	Blood Biomarkers	rs111834982	3	142019751	G	-0.178443	0.836572	0.0144613	5.56106e-35	linear	549721	NA	NA	2	0	0	0.557098	0.455432	na	nonHDL
Varicose veins of lower extremity	circulatory system	rs17764730	5	127357526	C	-0.136999	0.871971	0.0111032	5.60606e-35	logistic	709506	22876	686630	2	0	0	0.400454	0.526855	na	HDL
Calcium	Blood Biomarkers	rs77542162	17	67081278	A	0.00907231	1.00911	0.000736525	7.27214e-35	linear	376945	NA	NA	2	0.146149	64.9449	2.85266	0.0912231	ABCA5	LDL,TC,logTG,nonHDL
White_blood_cell_leukocyte_count	Blood Biomarkers	rs6734238	2	113841030	G	0.0578144	1.05952	0.00469682	8.07466e-35	linear	540877	NA	NA	2	0	0	0.00827428	0.927522	na	LDL,TC
Calcium	Blood Biomarkers	rs62192912	2	234144942	C	-0.00301264	0.996992	0.000244856	8.6497e-35	linear	365481	NA	NA	2	0	0	0.308492	0.578607	na	TC
HDL_cholesterol	Blood Biomarkers	rs2744944	6	34658080	A	-0.0105829	0.989473	0.000860839	9.79208e-35	linear	506994	NA	NA	2	0.00110329	58.4998	2.40963	0.120591	na	HDL
LDL_cor	Blood Biomarkers	rs2068888	10	94839642	A	-0.0238403	0.976442	0.00194092	1.11787e-34	linear	494153	NA	NA	2	0.015819	59.81	2.48818	0.114704	CYP26A1	LDL
HDL_cholesterol	Blood Biomarkers	rs3184504	12	111884608	T	-0.0101068	0.989944	0.000824493	1.51793e-34	linear	509923	NA	NA	2	0	0	0.0352487	0.851076	ALDH2	HDL
Neutrophill_count	Blood Biomarkers	rs3184504	12	111884608	T	0.0387746	1.03954	0.00316365	1.55432e-34	linear	520893	NA	NA	2	0.0310237	84.6115	6.49835	0.0107974	ALDH2	HDL
Red_blood_cell_erythrocyte_distribution_width	Blood Biomarkers	rs13201681	6	28394680	T	0.0405816	1.04142	0.00331156	1.58907e-34	linear	533711	NA	NA	2	0	0	0.329338	0.566049	TRIM27	logTG
Essential hypertension	circulatory system	rs653178	12	112007756	C	0.0493398	1.05058	0.00402748	1.66389e-34	logistic	712628	341454	371174	2	0	0	0.147532	0.700905	ALDH2	LDL,TC,nonHDL
Haemoglobin_concentration	Blood Biomarkers	rs2339718	12	111702646	G	-0.0313291	0.969157	0.00255753	1.68528e-34	linear	548618	NA	NA	2	0	0	0.0514039	0.820638	ATXN2	logTG
Alcohol-related disorders	mental disorders	rs144198753	4	99713350	T	-0.536678	0.584688	0.0438339	1.82162e-34	logistic	709389	53439	655950	2	0.0443649	79.2443	4.81794	0.0281649	na	LDL,TC
Mean_corpuscular_volume	Blood Biomarkers	rs3128759	6	31885930	C	0.12195	1.1297	0.00996681	2.0064e-34	linear	549243	NA	NA	2	0	0	0.711504	0.398945	APOM	LDL,TC,nonHDL
Alcoholic liver damage	mental disorders	rs1229984	4	100239319	T	-0.820326	0.440288	0.0671225	2.39131e-34	logistic	712628	8463	704165	2	0.52894	89.0375	9.12199	0.00252554	MTTP	nonHDL
Haematocrit_percentage	Blood Biomarkers	rs181058325	6	25314597	G	0.154224	1.16675	0.0126197	2.40375e-34	linear	547179	NA	NA	2	0.0454564	55.776	2.26122	0.13265	na	LDL,TC,nonHDL
Hypercholesterolemia	endocrine/metabolic	rs4245791	2	44074431	T	-0.0603466	0.941438	0.00493938	2.50872e-34	logistic	712628	116844	595784	2	0.000189496	79.4492	4.866	0.0273909	ABCG5	LDL,TC,logTG,nonHDL
Lymphocyte_percentage	Blood Biomarkers	rs10892870	11	122517803	A	-0.20329	0.816041	0.016653	2.83685e-34	linear	526549	NA	NA	2	0.0481599	88.4584	8.66433	0.003245	na	HDL
HbA1c	Blood Biomarkers	rs62551047	9	91434086	A	-0.3525	0.702929	0.0289225	3.61259e-34	linear	501759	NA	NA	2	0.0402543	88.6274	8.79305	0.0030238	na	LDL
Coronary atherosclerosis	circulatory system	rs7412	19	45412079	T	-0.112167	0.893895	0.00920911	3.97114e-34	logistic	712628	123318	589310	2	0.00324307	93.908	16.4149	5.08839e-05	APOE	LDL,TC,nonHDL
Total_bilirubin	Blood Biomarkers	rs2106727	7	17287998	A	0.121888	1.12963	0.0100156	4.50445e-34	linear	539633	NA	NA	2	0.00262912	47.6688	1.9109	0.166863	AHR	logTG
LDL_cor	Blood Biomarkers	rs4418728	10	94839724	T	-0.0236078	0.976669	0.00194148	5.09223e-34	linear	493724	NA	NA	2	0.0289412	72.8678	3.68566	0.0548824	na	HDL,TC,logTG,nonHDL
Total_bilirubin	Blood Biomarkers	rs4410790	7	17284577	T	0.121484	1.12917	0.00999125	5.13475e-34	linear	540620	NA	NA	2	0.00210758	43.6748	1.7754	0.182715	na	nonHDL
Albumin	Blood Biomarkers	rs144787122	7	2296552	A	0.590079	1.80413	0.0485916	6.19922e-34	linear	505330	NA	NA	2	0.692332	75.8523	4.14118	0.041852	na	HDL,LDL,TC,nonHDL
Edema	symptoms	rs56094641	16	53806453	G	0.0765512	1.07956	0.00630601	6.53051e-34	logistic	712424	67570	644854	2	0.000327055	54.9443	2.21948	0.136279	na	HDL
Direct_bilirubin	Blood Biomarkers	rs7412	19	45412079	T	0.0448097	1.04583	0.0036947	7.4955e-34	linear	424476	NA	NA	2	0.0550137	93.1727	14.647	0.00012964	APOE	LDL,TC,nonHDL
Total_bilirubin	Blood Biomarkers	rs6968554	7	17287106	G	-0.121346	0.885728	0.0100098	8.00622e-34	linear	539872	NA	NA	2	0.00281653	49.3595	1.9747	0.159949	AHR	HDL
Mean_corpuscular_haemoglobin	Blood Biomarkers	rs1321505	6	28052823	C	-0.0679612	0.934297	0.00560787	8.38954e-34	linear	550810	NA	NA	2	0.023796	60.974	2.5624	0.109433	ZKSCAN4	HDL
Occlusion and stenosis of precerebral arteries	circulatory system	rs1333047	9	22124504	T	0.110552	1.11689	0.0091223	8.39251e-34	logistic	711668	28076	683592	2	0.0013178	72.6297	3.6536	0.0559482	na	nonHDL
Coronary atherosclerosis	circulatory system	rs429358	19	45411941	C	0.0834992	1.08708	0.00689521	9.37892e-34	logistic	712628	123318	589310	2	0.000826549	88.4771	8.67836	0.0032201	APOE	HDL
Neurological disorders	mental disorders	rs429358	19	45411941	C	0.19501	1.21532	0.0161044	9.44492e-34	logistic	712628	13807	698821	2	0.00537669	90.7396	10.7987	0.00101571	APOE	HDL
Total_bilirubin	Blood Biomarkers	rs1661052	11	2942593	G	0.202281	1.22419	0.0167177	1.05831e-33	linear	540620	NA	NA	2	0.0719525	88.9642	9.06144	0.00261056	SLC22A18	TC
CRP	Blood Biomarkers	rs13398728	2	113842506	C	0.119832	1.12731	0.00990689	1.11135e-33	linear	414378	NA	NA	2	0.00312758	72.2714	3.60639	0.057558	na	nonHDL
Glaucoma	sense organs	rs1537373	9	22103341	G	0.0787807	1.08197	0.00651406	1.13703e-33	logistic	710910	58538	652372	2	0.000732717	84.1558	6.31147	0.0119959	na	LDL
Open-angle glaucoma	sense organs	rs10757273	9	22090301	A	0.0963482	1.10114	0.00797346	1.28919e-33	logistic	686968	42362	644606	2	0.00312059	86.2915	7.29475	0.00691563	na	TC
Eosinophill_count	Blood Biomarkers	rs2057655	5	131807624	A	0.00477246	1.00478	0.000394954	1.28947e-33	linear	528681	NA	NA	2	0.0243137	77.9574	4.53666	0.0331763	IRF1	LDL
Lymphocyte_percentage	Blood Biomarkers	rs7129071	11	122527120	G	-0.202845	0.816405	0.0167875	1.29809e-33	linear	527686	NA	NA	2	0.0391954	85.8142	7.04928	0.00792972	na	nonHDL
White_blood_cell_leukocyte_count	Blood Biomarkers	rs13398728	2	113842506	C	0.0571146	1.05878	0.00472837	1.3616e-33	linear	540517	NA	NA	2	0	0	0.0714632	0.789218	na	nonHDL
Triglycerides	Blood Biomarkers	rs6467314	7	130442141	C	-0.0296821	0.970754	0.00245763	1.38821e-33	linear	537172	NA	NA	2	0.00187093	67.6697	3.09307	0.0786263	na	LDL
Total_bilirubin	Blood Biomarkers	rs80215559	6	25918225	C	0.218076	1.24368	0.0180673	1.51723e-33	linear	540620	NA	NA	2	0.0347778	76.1463	4.19222	0.0406099	na	LDL,TC,nonHDL
Hyperlipidemia	endocrine/metabolic	rs34042070	16	72101525	C	-0.0689239	0.933398	0.00571038	1.52244e-33	logistic	707727	279588	428139	2	0	0	0.459151	0.498021	HP	nonHDL
Red_blood_cell_erythrocyte_count	Blood Biomarkers	rs2608301	12	53793314	C	-0.0125064	0.987571	0.00103665	1.63222e-33	linear	549568	NA	NA	2	0	0	0.459067	0.49806	na	LDL
Alanine_aminotransferase	Blood Biomarkers	rs36086195	1	16510894	C	-0.347098	0.706736	0.0287754	1.6702e-33	linear	542520	NA	NA	2	0.0260008	89.184	9.2456	0.00236062	na	LDL,TC,nonHDL
White_blood_cell_leukocyte_count	Blood Biomarkers	rs76428106	13	28604007	C	0.27278	1.31361	0.0226199	1.73277e-33	linear	537628	NA	NA	2	0	0	0.307326	0.579326	na	TC
HDL_cholesterol	Blood Biomarkers	rs7252574	19	8441779	C	-0.0099428	0.990106	0.000824759	1.81658e-33	linear	509091	NA	NA	2	0	0	0.0195075	0.888921	ANGPTL4	TC
Occlusion and stenosis of precerebral arteries	circulatory system	rs1537373	9	22103341	G	0.109795	1.11605	0.00911013	1.89496e-33	logistic	710910	28073	682837	2	0.00226505	81.9686	5.54587	0.0185244	na	LDL
Urea	Blood Biomarkers	rs4390169	1	155106054	G	0.0365086	1.03718	0.0030308	2.03938e-33	linear	544264	NA	NA	2	0.0795329	91.0004	11.1116	0.000857916	na	LDL
Disorders of bilirubin excretion	endocrine/metabolic	rs17868301	2	234512095	C	1.15185	3.16403	0.0956254	2.05072e-33	logistic	711807	3423	708384	2	0.0287676	52.2799	2.09555	0.147728	na	logTG
HDL_cholesterol	Blood Biomarkers	rs653178	12	112007756	C	-0.00991331	0.990136	0.000824447	2.65143e-33	linear	509923	NA	NA	2	0	0	0.00511522	0.942983	ALDH2	LDL,TC,nonHDL
Abdominal aortic aneurysm	circulatory system	rs10757273	9	22090301	A	0.147807	1.15929	0.0122941	2.70328e-33	logistic	686968	16122	670846	2	0.00223564	76.961	4.34047	0.0372167	na	TC
HbA1c	Blood Biomarkers	rs864745	7	28180556	C	-0.164493	0.848324	0.013688	2.88189e-33	linear	504185	NA	NA	2	0.00136045	55.1068	2.22751	0.135572	na	logTG
Alcoholism	mental disorders	rs144198753	4	99713350	T	-0.521721	0.593498	0.0434411	3.154e-33	logistic	709389	53232	656157	2	0.00642438	32.4457	1.48029	0.223729	na	LDL,TC
BMI	Physical Measures	rs2613496	1	72754788	C	0.143205	1.15397	0.0119302	3.40367e-33	linear	563586	NA	NA	2	0	0	0.109162	0.7411	na	HDL
Lymphocyte_percentage	Blood Biomarkers	rs7930518	11	122523596	G	-0.200593	0.818246	0.0167212	3.71633e-33	linear	527518	NA	NA	2	0.0317309	83.0574	5.90229	0.0151213	na	LDL,TC
Mean_corpuscular_haemoglobin	Blood Biomarkers	rs2273668	6	109323519	T	-0.0744111	0.92829	0.00620333	3.75808e-33	linear	550815	NA	NA	2	0	0	0.0150827	0.902256	na	LDL
LDL_cor	Blood Biomarkers	rs75460349	1	27180088	C	0.0776149	1.08071	0.00647122	3.82595e-33	linear	492763	NA	NA	2	0	0	0.831516	0.361835	ARID1A	HDL
Monocyte_count	Blood Biomarkers	rs1264377	6	30764907	A	-0.00754262	0.992486	0.000628922	3.8698e-33	linear	513466	NA	NA	2	0.0328288	76.0233	4.17072	0.0411284	na	HDL
Alanine_aminotransferase	Blood Biomarkers	rs4841133	8	9183664	A	0.588484	1.80126	0.0491157	4.43784e-33	linear	543479	NA	NA	2	0.0763743	89.353	9.39232	0.00217896	TNKS	nonHDL
Mean_platelet_thrombocyte_volume	Blood Biomarkers	rs11042906	11	10665235	T	0.0319756	1.03249	0.00266907	4.52135e-33	linear	533561	NA	NA	2	0.110761	92.9501	14.1847	0.000165714	na	logTG
White_blood_cell_leukocyte_count	Blood Biomarkers	rs4655772	1	66130398	A	0.0560485	1.05765	0.00467868	4.54747e-33	linear	532523	NA	NA	2	0	0	0.411092	0.521416	LEPR	LDL
White_blood_cell_leukocyte_count	Blood Biomarkers	rs11208700	1	66133443	A	0.0558702	1.05746	0.00466523	4.75348e-33	linear	532632	NA	NA	2	0	0	0.370905	0.542511	LEPR	TC
BMI	Physical Measures	rs1412234	9	28410683	C	0.118991	1.12636	0.00993997	5.04086e-33	linear	559888	NA	NA	2	0	0	0.0188762	0.890722	na	HDL
BMI	Physical Measures	rs17109256	14	79939993	A	0.134034	1.14343	0.0111991	5.21044e-33	linear	563157	NA	NA	2	0.000796236	68.4363	3.16819	0.0750855	na	HDL
Red_blood_cell_erythrocyte_count	Blood Biomarkers	rs80297745	12	53801461	C	-0.0124575	0.98762	0.00104099	5.29513e-33	linear	549596	NA	NA	2	0	0	0.225013	0.635246	na	nonHDL
HDL_cholesterol	Blood Biomarkers	rs11394256	10	45957247	C	-0.0115166	0.988549	0.000963093	5.90262e-33	linear	508883	NA	NA	2	0	0	0.00498275	0.943725	na	nonHDL
Other chronic nonalcoholic liver disease	digestive	rs2980888	8	126507308	T	0.127167	1.13561	0.010638	6.18672e-33	logistic	712299	21867	690432	2	0.0040976	93.7081	15.8935	6.70068e-05	TRIB1	HDL
Eosinophill_count	Blood Biomarkers	rs7730247	5	131781288	C	0.00469693	1.00471	0.000393021	6.4274e-33	linear	528833	NA	NA	2	0.0284979	80.9393	5.24639	0.0219924	IRF1	nonHDL
Total_bilirubin	Blood Biomarkers	rs2068888	10	94839642	A	0.115219	1.12212	0.00965808	8.28004e-33	linear	540620	NA	NA	2	0.000372057	12.6452	1.14476	0.284649	CYP26A1	LDL
LDL_cor	Blood Biomarkers	rs6602909	13	114551993	T	-0.0246501	0.975651	0.00206789	9.26035e-33	linear	492330	NA	NA	2	0	0	0.695873	0.404174	GAS6	LDL,TC,logTG,nonHDL
Neutrophill_count	Blood Biomarkers	rs12943633	17	37970365	T	0.0704341	1.07297	0.00591083	9.75606e-33	linear	519222	NA	NA	2	0.0289876	59.0019	2.43914	0.118341	na	LDL
Triglycerides	Blood Biomarkers	rs3128759	6	31885930	C	-0.0276357	0.972743	0.00232207	1.16523e-32	linear	541016	NA	NA	2	0.00528577	86.9839	7.68277	0.00557506	APOM	LDL,TC,nonHDL
Type 2 diabetes	endocrine/metabolic	rs11708067	3	123065778	G	-0.0658527	0.936269	0.00553474	1.21147e-32	logistic	712628	136891	575737	2	0.00108311	93.4326	15.2267	9.53471e-05	ADCY5	HDL
Alanine_aminotransferase	Blood Biomarkers	rs4841132	8	9183596	A	0.58548	1.79585	0.0492172	1.24382e-32	linear	543580	NA	NA	2	0.0781031	89.5235	9.54514	0.0020048	TNKS	HDL,LDL,TC
Lymphocyte_percentage	Blood Biomarkers	rs4760	19	44153100	G	0.264569	1.30287	0.0222445	1.27608e-32	linear	528555	NA	NA	2	0	0	9.0899e-05	0.992393	na	HDL
Eosinophill_percentage	Blood Biomarkers	rs11066412	12	113218868	A	0.0559359	1.05753	0.00470356	1.29848e-32	linear	528330	NA	NA	2	0.0106904	60.1449	2.50909	0.113191	PTPN11	LDL,TC
LDL_cor	Blood Biomarkers	rs55938402	2	118843158	A	-0.0386684	0.96207	0.0032517	1.30651e-32	linear	489631	NA	NA	2	0.123508	79.1624	4.79903	0.0284758	na	LDL,TC,nonHDL
LDL_cor	Blood Biomarkers	rs62116988	19	44296689	A	-0.0620563	0.93983	0.00521932	1.33813e-32	linear	494153	NA	NA	2	0.0521475	25.8393	1.34842	0.245554	na	TC,nonHDL
Psoriasis	dermatologic	rs9378248	6	31326289	G	-0.260119	0.77096	0.0218827	1.38337e-32	logistic	710830	4410	706420	2	0.0267967	91.6379	11.9588	0.000543905	APOM	logTG
Myocardial infarction	circulatory system	rs7528419	1	109817192	G	-0.0998939	0.904933	0.00840837	1.49823e-32	logistic	712628	48726	663902	2	0	0	0.361226	0.547826	na	logTG
Triglycerides	Blood Biomarkers	rs78058190	2	219699999	A	0.0785521	1.08172	0.00661409	1.56845e-32	linear	511895	NA	NA	2	0.0784223	91.8779	12.3121	0.000450037	na	HDL,LDL,logTG,nonHDL
Neutrophill_count	Blood Biomarkers	rs653178	12	112007756	C	0.037544	1.03826	0.00316355	1.74181e-32	linear	520893	NA	NA	2	0.0331949	85.4844	6.88916	0.008672	ALDH2	LDL,TC,nonHDL
HDL_cholesterol	Blood Biomarkers	rs2291428	10	45958856	G	-0.0114111	0.988654	0.000963136	2.20678e-32	linear	507762	NA	NA	2	0	0	0.0119321	0.913017	na	TC
Edema	symptoms	rs62033400	16	53811788	A	-0.074758	0.927968	0.00631075	2.25346e-32	logistic	712006	67563	644443	2	0.000523344	65.9089	2.93331	0.0867692	na	logTG
Haemoglobin_concentration	Blood Biomarkers	rs6676150	1	155123837	C	-0.02693	0.973429	0.00227355	2.28639e-32	linear	546537	NA	NA	2	0.013829	60.82	2.55232	0.110132	na	TC
Neutrophill_count	Blood Biomarkers	rs1321505	6	28052823	C	-0.0519656	0.949362	0.00438765	2.3224e-32	linear	520888	NA	NA	2	0.00863896	40.406	1.67802	0.195188	ZKSCAN4	HDL
HDL_cholesterol	Blood Biomarkers	rs78058190	2	219699999	A	-0.0285112	0.971891	0.00240922	2.59854e-32	linear	481780	NA	NA	2	0.0306928	81.9448	5.53858	0.0186017	na	HDL,LDL,logTG,nonHDL
Hyperlipidemia	endocrine/metabolic	rs2000999	16	72108093	G	-0.0668861	0.935302	0.00565517	2.81693e-32	logistic	712628	280273	432355	2	1.42172e-05	18.068	1.22052	0.269258	na	logTG
Varicose veins of lower extremity	circulatory system	rs7734927	5	127453735	T	0.128974	1.13766	0.010906	2.86612e-32	logistic	711992	22946	689046	2	0	0	0.0379331	0.845578	SLC12A2	logTG
HDL_cholesterol	Blood Biomarkers	rs11172134	12	57645789	A	0.0121457	1.01222	0.00102779	3.17883e-32	linear	505994	NA	NA	2	0.00195966	62.9716	2.70063	0.100309	na	LDL
Lymphocyte_percentage	Blood Biomarkers	rs1265097	6	31106459	C	-0.352646	0.702826	0.0298569	3.41561e-32	linear	528555	NA	NA	2	0.138826	89.9544	9.95458	0.0016045	PRRC2A	LDL,nonHDL
Mean_corpuscular_volume	Blood Biomarkers	rs80297745	12	53801461	C	0.151479	1.16355	0.0128267	3.47864e-32	linear	549703	NA	NA	2	0.015753	56.1623	2.28114	0.130955	na	nonHDL
Mean_corpuscular_volume	Blood Biomarkers	rs2608301	12	53793314	C	0.150733	1.16269	0.0127711	3.78484e-32	linear	549675	NA	NA	2	0.0240519	66.4689	2.98231	0.0841792	na	LDL
Other chronic nonalcoholic liver disease	digestive	rs28601761	8	126500031	G	-0.122125	0.885037	0.01035	3.92146e-32	logistic	693871	21605	672266	2	0.00191622	88.119	8.41677	0.00371776	na	LDL,TC,logTG,nonHDL
Hematuria	genitourinary	rs3128759	6	31885930	C	-0.0815136	0.92172	0.00690839	3.94017e-32	logistic	711035	52257	658778	2	0.000506752	83.5876	6.09296	0.0135722	APOM	LDL,TC,nonHDL
Red_blood_cell_erythrocyte_distribution_width	Blood Biomarkers	rs1264347	6	30798697	T	0.03664	1.03732	0.00310538	3.95606e-32	linear	516761	NA	NA	2	0.0200309	55.8911	2.26711	0.132146	na	logTG
HDL_cholesterol	Blood Biomarkers	rs10242866	7	17920613	T	-0.00994219	0.990107	0.000843034	4.22453e-32	linear	508723	NA	NA	2	0	0	0.650551	0.419916	na	HDL,TC
HDL_cholesterol	Blood Biomarkers	rs3812316	7	73020337	G	0.014495	1.0146	0.00122909	4.22769e-32	linear	509923	NA	NA	2	0.0198832	92.6486	13.6029	0.000225842	MLXIPL	logTG
Atherosclerosis of the extremities	circulatory system	rs1333047	9	22124504	T	0.175536	1.19189	0.0148921	4.54264e-32	logistic	711668	9742	701926	2	0.00176177	67.8122	3.10677	0.0779676	na	nonHDL
BMI	Physical Measures	rs2744944	6	34658080	A	0.114259	1.12104	0.00969673	4.76227e-32	linear	560383	NA	NA	2	0.000627841	69.7742	3.30843	0.0689251	na	HDL
Haematocrit_percentage	Blood Biomarkers	rs342467	4	88052219	T	0.0782004	1.08134	0.00664239	5.38177e-32	linear	550143	NA	NA	2	0.00959566	53.455	2.14846	0.142713	AFF1	LDL
LDL_cor	Blood Biomarkers	rs2737245	8	116658583	T	-0.0254382	0.974883	0.00216149	5.65123e-32	linear	489606	NA	NA	2	0.118086	89.3993	9.43336	0.00213073	na	TC
Iron deficiency anemias, unspecified or not due to blood loss	hematopoietic	rs855791	22	37462936	G	-0.0854892	0.918063	0.00726491	5.74563e-32	logistic	704096	41588	662508	2	0.000821126	87.7187	8.14248	0.004324	na	LDL
Haematocrit_percentage	Blood Biomarkers	rs342469	4	88050554	A	-0.0781358	0.924839	0.00664205	5.99635e-32	linear	550205	NA	NA	2	0.00906884	52.0698	2.08637	0.148619	AFF1	HDL
Haematocrit_percentage	Blood Biomarkers	rs342466	4	88053085	C	0.0781445	1.08128	0.00664318	6.04551e-32	linear	550125	NA	NA	2	0.0122749	59.4317	2.46498	0.116409	AFF1	logTG
LDL_cor	Blood Biomarkers	rs3128759	6	31885930	C	-0.0233109	0.976959	0.00198243	6.36742e-32	linear	492626	NA	NA	2	0	0	0.0440213	0.833814	APOM	LDL,TC,nonHDL
Urea	Blood Biomarkers	rs7964492	12	57823585	A	0.0414209	1.04229	0.00352398	6.73554e-32	linear	544095	NA	NA	2	0	0	0.281351	0.595817	na	HDL,logTG
Mean_corpuscular_haemoglobin	Blood Biomarkers	rs1434282	1	199010721	C	-0.0535812	0.947829	0.00456204	7.49128e-32	linear	545775	NA	NA	2	0	0	0.302217	0.582496	PTPRC	LDL,TC
Mean_platelet_thrombocyte_volume	Blood Biomarkers	rs9293683	5	75700310	C	-0.0300106	0.970435	0.0025566	8.09378e-32	linear	531166	NA	NA	2	0	0	3.5333e-06	0.9985	na	HDL
Total_bilirubin	Blood Biomarkers	rs4418728	10	94839724	T	0.113421	1.1201	0.00966314	8.19226e-32	linear	540191	NA	NA	2	0.00935458	78.2142	4.59015	0.0321562	na	HDL,TC,logTG,nonHDL
Alanine_aminotransferase	Blood Biomarkers	rs10787429	10	113949664	C	-0.377032	0.685894	0.032141	8.88515e-32	linear	542430	NA	NA	2	0.0610005	93.5692	15.5501	8.03457e-05	GPAM	nonHDL
HbA1c	Blood Biomarkers	rs35657082	6	27067657	T	-0.293502	0.745647	0.0250343	9.60183e-32	linear	497058	NA	NA	2	0.0722415	94.6563	18.7135	1.51902e-05	na	LDL,TC,nonHDL
HDL_cholesterol	Blood Biomarkers	rs11239551	10	46026107	G	-0.0113177	0.988746	0.000966428	1.12126e-31	linear	507097	NA	NA	2	0	0	0.0563301	0.812393	na	HDL
Urea	Blood Biomarkers	rs12313762	12	57692470	T	-0.0413369	0.959506	0.00353163	1.20489e-31	linear	544009	NA	NA	2	0.00461438	29.0299	1.40904	0.235215	na	nonHDL
Mean_corpuscular_haemoglobin	Blood Biomarkers	rs11153143	6	109300661	T	-0.0718029	0.930714	0.0061349	1.21586e-31	linear	548971	NA	NA	2	0	0	0.000636609	0.979871	na	TC
TC_cor	Blood Biomarkers	rs7255743	19	46018119	A	-0.176117	0.83852	0.0150479	1.21943e-31	linear	492299	NA	NA	2	0.229351	51.1703	2.04793	0.152413	na	TC,nonHDL
TC_cor	Blood Biomarkers	rs1800961	20	43042364	T	-0.121536	0.885559	0.0103877	1.27329e-31	linear	494687	NA	NA	2	1.2374	90.9754	11.0808	0.000872258	HNF4A	HDL,LDL,TC,nonHDL
Mean_platelet_thrombocyte_volume	Blood Biomarkers	rs681343	19	49206462	C	0.028339	1.02874	0.00242369	1.39206e-31	linear	533561	NA	NA	2	0.0207348	76.0804	4.18068	0.0408874	na	LDL,nonHDL
Type 2 diabetes	endocrine/metabolic	rs703966	10	80954251	G	0.0560069	1.05761	0.00479126	1.44426e-31	logistic	710242	136715	573527	2	9.21389e-05	61.9268	2.62652	0.105092	ZMIZ1	HDL
White_blood_cell_leukocyte_count	Blood Biomarkers	rs9378248	6	31326289	G	-0.0571489	0.944453	0.00489019	1.4953e-31	linear	539136	NA	NA	2	0.020519	73.3988	3.75923	0.0525167	APOM	logTG
Other chronic ischemic heart disease, unspecified	circulatory system	rs2297359	6	160492613	T	-0.249205	0.77942	0.0213489	1.75194e-31	logistic	712288	88670	623618	2	0.00344615	77.8588	4.51647	0.03357	IGF2R	LDL
Albumin	Blood Biomarkers	rs4704043	5	72159179	C	0.0783287	1.08148	0.00671155	1.79867e-31	linear	503329	NA	NA	2	0	0	0.0671271	0.795567	na	LDL,nonHDL
LDL_cor	Blood Biomarkers	rs2721961	8	116657911	G	-0.0251376	0.975176	0.00215654	2.12733e-31	linear	489824	NA	NA	2	0.118581	89.5179	9.54004	0.00201037	na	LDL
BMI	Physical Measures	rs2613505	1	72835410	C	-0.137809	0.871265	0.0118289	2.28837e-31	linear	561940	NA	NA	2	0	0	0.0204013	0.886422	na	logTG
Gout	endocrine/metabolic	rs11172134	12	57645789	A	-0.122864	0.884384	0.0105516	2.45933e-31	logistic	708158	35844	672314	2	0	0	0.164897	0.684687	na	LDL
Eosinophill_percentage	Blood Biomarkers	rs35045014	6	107432157	C	0.0486673	1.04987	0.00418298	2.74842e-31	linear	534032	NA	NA	2	0	0	0.00891035	0.924796	na	logTG
White_blood_cell_leukocyte_count	Blood Biomarkers	rs4947249	6	31302029	G	-0.0561738	0.945375	0.00483459	3.29434e-31	linear	529704	NA	NA	2	0	0	0.00659903	0.935256	APOM	HDL
Haemoglobin_concentration	Blood Biomarkers	rs55707100	15	43820717	T	-0.0823082	0.920988	0.00708604	3.43591e-31	linear	550969	NA	NA	2	0	0	0.202312	0.652861	na	HDL
HDL_cholesterol	Blood Biomarkers	rs11045172	12	20470221	A	-0.0121161	0.987957	0.00104338	3.56918e-31	linear	505753	NA	NA	2	0	0	0.197287	0.656919	PDE3A	HDL
Lymphocyte_percentage	Blood Biomarkers	rs59391722	22	21920817	C	-0.240041	0.786595	0.0206789	3.75203e-31	linear	528274	NA	NA	2	0.0742288	88.2045	8.47782	0.00359503	na	TC
Eosinophill_percentage	Blood Biomarkers	rs11171739	12	56470625	T	-0.0483126	0.952836	0.00416306	3.88341e-31	linear	541036	NA	NA	2	0	0	0.00115528	0.972886	na	HDL
Alanine_aminotransferase	Blood Biomarkers	rs2792751	10	113940329	C	-0.366666	0.693041	0.0316127	4.18426e-31	linear	543580	NA	NA	2	0.0545432	93.821	16.184	5.74784e-05	na	LDL
Mean_platelet_thrombocyte_volume	Blood Biomarkers	rs1519103	2	66677881	G	0.0299052	1.03036	0.00257871	4.26974e-31	linear	526487	NA	NA	2	0	0	0.134868	0.713437	MEIS1	HDL
Hyperlipidemia	endocrine/metabolic	rs3850634	1	63050598	G	-0.055883	0.94565	0.00482451	5.01717e-31	logistic	712480	280254	432226	2	2.41433e-05	34.1142	1.51778	0.217956	ANGPTL3	HDL
Red_blood_cell_erythrocyte_count	Blood Biomarkers	rs1476306	16	67973171	C	-0.0123481	0.987728	0.00106606	5.03172e-31	linear	550331	NA	NA	2	0	0	0.194054	0.659563	LCAT	TC
BMI	Physical Measures	rs7196161	16	31110981	G	-0.110964	0.894971	0.00958073	5.08525e-31	linear	563334	NA	NA	2	2.88863e-05	10.0497	1.11172	0.291707	na	logTG
Type 2 diabetes	endocrine/metabolic	rs11719201	3	123068744	T	-0.0639289	0.938072	0.00552476	5.75763e-31	logistic	710915	136767	574148	2	0.00103468	93.1799	14.6625	0.000128582	na	LDL,TC
Celiac disease	digestive	rs1265097	6	31106459	C	0.616527	1.85248	0.0532944	5.96245e-31	logistic	712628	3758	708870	2	0.00863054	59.4937	2.46875	0.11613	PRRC2A	LDL,nonHDL
Hyperlipidemia	endocrine/metabolic	rs995000	1	63107526	T	-0.0553351	0.946168	0.00478366	6.02062e-31	logistic	712456	280245	432211	2	1.18366e-05	20.4948	1.25778	0.262072	ANGPTL3	TC
Ankylosing spondylitis	musculoskeletal	rs4947249	6	31302029	G	-0.395928	0.673055	0.0342451	6.45012e-31	logistic	701088	2164	698924	2	0.00915901	75.6887	4.11331	0.0425471	APOM	HDL
HDL_cholesterol	Blood Biomarkers	rs11045171	12	20470199	G	0.0120666	1.01214	0.00104398	6.71077e-31	linear	505759	NA	NA	2	0	0	0.257739	0.611678	PDE3A	logTG
Eosinophill_count	Blood Biomarkers	rs1321505	6	28052823	C	-0.00489581	0.995116	0.000423622	6.80122e-31	linear	531035	NA	NA	2	0.00765849	44.0577	1.78756	0.181224	ZKSCAN4	HDL
Monocyte_count	Blood Biomarkers	rs507666	9	136149399	G	0.00723154	1.00726	0.000625847	6.98096e-31	linear	513466	NA	NA	2	0	0	0.065762	0.79761	na	LDL
Red_blood_cell_erythrocyte_distribution_width	Blood Biomarkers	rs10096633	8	19830921	T	0.0374335	1.03814	0.00324069	7.28841e-31	linear	533750	NA	NA	2	0.0753699	83.88	6.20349	0.0127499	LPL	nonHDL
LDL_cor	Blood Biomarkers	rs35980001	15	58722590	G	-0.0276069	0.972771	0.00238999	7.29297e-31	linear	486911	NA	NA	2	0.0198213	54.7021	2.20761	0.137332	LIPC	LDL
LDL_cor	Blood Biomarkers	rs2737246	8	116659578	C	-0.0249052	0.975402	0.00215755	7.98078e-31	linear	490465	NA	NA	2	0.115279	89.1812	9.24319	0.00236372	na	nonHDL
LDL_cor	Blood Biomarkers	rs13108218	4	3443931	G	-0.0233516	0.976919	0.002023	8.00352e-31	linear	482041	NA	NA	2	0	0	0.00253208	0.959868	LRPAP1	LDL,TC,logTG,nonHDL
Monocyte_count	Blood Biomarkers	rs2519093	9	136141870	C	0.0072187	1.00724	0.00062578	8.73507e-31	linear	513171	NA	NA	2	0	0	0.0472305	0.827954	na	HDL,TC,nonHDL
Triglycerides	Blood Biomarkers	rs2081687	8	59388565	C	-0.0276158	0.972762	0.00239502	9.258e-31	linear	542544	NA	NA	2	0	0	0.128789	0.719691	na	logTG
LDL_cor	Blood Biomarkers	rs11621792	14	24871926	C	-0.0226555	0.977599	0.00196696	1.06987e-30	linear	483701	NA	NA	2	0.0395916	78.1026	4.56675	0.0325983	na	LDL,TC
Other non-epithelial cancer of skin	neoplasms	rs2110690	2	202185132	A	0.0783576	1.08151	0.00680318	1.07318e-30	logistic	709290	60028	649262	2	0.000338519	70.6338	3.40527	0.0649884	na	logTG
Red_blood_cell_erythrocyte_distribution_width	Blood Biomarkers	rs117199990	8	19820916	T	0.040655	1.04149	0.00353145	1.14433e-30	linear	533589	NA	NA	2	0.0584965	76.6555	4.28367	0.0384802	LPL	logTG
LDL_cor	Blood Biomarkers	rs11601507	11	5701074	C	-0.0435606	0.957375	0.00378527	1.20323e-30	linear	494153	NA	NA	2	0.0201408	34.2382	1.52064	0.217523	na	LDL,nonHDL
Hematuria	genitourinary	rs1264347	6	30798697	T	-0.118907	0.88789	0.0103341	1.22732e-30	logistic	695156	51598	643558	2	0.00202578	90.1543	10.1567	0.00143777	na	logTG
Glaucoma	sense organs	rs10757273	9	22090301	A	0.0786859	1.08186	0.00684033	1.27072e-30	logistic	686968	57996	628972	2	0.000473884	76.1943	4.20067	0.0404081	na	TC
Ascites (non malignant)	digestive	rs738408	22	44324730	T	0.225832	1.25336	0.0196445	1.38314e-30	logistic	712434	6942	705492	2	0.00647748	88.9922	9.0845	0.00257785	na	HDL,TC,logTG
Haematocrit_percentage	Blood Biomarkers	rs1233393	6	29549653	G	-0.111109	0.894841	0.00967051	1.49075e-30	linear	550824	NA	NA	2	0	0	0.526061	0.468268	na	logTG
Haemoglobin_concentration	Blood Biomarkers	rs139974673	15	44027885	T	0.0815851	1.08501	0.00710364	1.57003e-30	linear	550616	NA	NA	2	0	0	0.41902	0.517426	TP53BP1	logTG,nonHDL
HbA1c	Blood Biomarkers	rs1584063	3	12266855	A	-0.158463	0.853455	0.0137979	1.57753e-30	linear	502364	NA	NA	2	0.00676641	85.5631	6.9267	0.00849185	PPARG	TC
Phlebitis and thrombophlebitis	circulatory system	rs507666	9	136149399	G	-0.250428	0.778467	0.0218157	1.67747e-30	logistic	712628	5982	706646	2	0	0	0.52641	0.46812	na	LDL
LDL_cor	Blood Biomarkers	rs4860987	4	69491284	A	-0.0284906	0.971911	0.00248359	1.83341e-30	linear	428385	NA	NA	2	0	0	0.760326	0.383226	na	LDL,TC,nonHDL
Red_blood_cell_erythrocyte_count	Blood Biomarkers	rs760077	1	155178782	A	-0.00923652	0.990806	0.000806106	2.13943e-30	linear	550686	NA	NA	2	0.0136549	66.0914	2.94911	0.0859251	na	nonHDL
Lymphocyte_percentage	Blood Biomarkers	rs2305637	3	47045846	T	-0.242981	0.784286	0.0212222	2.3674e-30	linear	528555	NA	NA	2	0.0879272	89.7314	9.73839	0.00180459	na	HDL
Neutrophill_count	Blood Biomarkers	rs7776054	6	135418916	G	-0.0412426	0.959596	0.00360274	2.41852e-30	linear	519606	NA	NA	2	0.010275	58.1161	2.38755	0.122305	na	LDL,TC,nonHDL
Psoriasis vulgaris	dermatologic	rs4947249	6	31302029	G	-0.136629	0.872294	0.0119474	2.7671e-30	logistic	701088	16751	684337	2	0.00448288	90.569	10.6034	0.00112882	APOM	HDL
Mean_platelet_thrombocyte_volume	Blood Biomarkers	rs11601507	11	5701074	C	-0.0541154	0.947323	0.00473488	2.99231e-30	linear	533561	NA	NA	2	0.00869307	26.3899	1.35851	0.243796	na	LDL,nonHDL
Phlebitis and thrombophlebitis	circulatory system	rs2519093	9	136141870	C	-0.249556	0.779147	0.021842	3.11847e-30	logistic	712322	5979	706343	2	0	0	0.537395	0.463514	na	HDL,TC,nonHDL
Triglycerides	Blood Biomarkers	rs4722551	7	25991826	C	-0.0353799	0.965239	0.00309705	3.18178e-30	linear	542544	NA	NA	2	0	0	0.232889	0.62939	na	LDL,TC,logTG,nonHDL
Atherosclerosis of the extremities	circulatory system	rs1537373	9	22103341	G	0.169844	1.18512	0.0148783	3.49671e-30	logistic	710910	9741	701169	2	0.00107726	56.2728	2.28691	0.13047	na	LDL
LDL_cor	Blood Biomarkers	rs1495741	8	18272881	A	-0.0265821	0.973768	0.00232871	3.52105e-30	linear	494153	NA	NA	2	0	0	0.829323	0.362468	na	nonHDL
Neutrophill_count	Blood Biomarkers	rs4449583	5	1284135	T	0.0388365	1.0396	0.00340323	3.65671e-30	linear	514003	NA	NA	2	0.00330973	33.3268	1.49985	0.220694	na	HDL
LDL_cor	Blood Biomarkers	rs35081008	19	58662235	T	-0.031426	0.969063	0.00275414	3.70753e-30	linear	491077	NA	NA	2	0.238918	91.9594	12.4369	0.000420934	SLC27A5	LDL,nonHDL
Umbilical hernia	digestive	rs59770119	1	219664627	A	-0.125863	0.881736	0.0110373	4.01805e-30	logistic	704726	18136	686590	2	0.000161826	36.384	1.57193	0.209927	na	HDL
Direct_bilirubin	Blood Biomarkers	rs58542926	19	19379549	T	0.0434736	1.04443	0.00381286	4.09451e-30	linear	424476	NA	NA	2	0	0	0.0186947	0.891245	na	LDL,TC,logTG,nonHDL
Albumin	Blood Biomarkers	rs13389219	2	165528876	T	-0.0706734	0.931766	0.00619886	4.1322e-30	linear	505184	NA	NA	2	0.00957548	74.6017	3.93728	0.0472271	na	logTG
Neutrophill_count	Blood Biomarkers	rs507666	9	136149399	G	0.0464397	1.04753	0.00407384	4.20667e-30	linear	520893	NA	NA	2	0.0359912	79.933	4.98331	0.0255929	na	LDL
Lymphocyte_percentage	Blood Biomarkers	rs140490	22	21921686	T	-0.234146	0.791246	0.0205419	4.25415e-30	linear	528282	NA	NA	2	0.0687407	88.0023	8.33496	0.00388894	YDJC	nonHDL
Monocyte_count	Blood Biomarkers	rs1292071	17	57926911	C	-0.0055583	0.994457	0.000487657	4.27987e-30	linear	512412	NA	NA	2	0	0	0.451505	0.501621	na	LDL,TC
HDL_cholesterol	Blood Biomarkers	rs1543896	12	109920071	G	-0.00938149	0.990662	0.000823505	4.57579e-30	linear	509646	NA	NA	2	0.00212962	74.8323	3.97335	0.0462257	na	HDL
Neutrophill_count	Blood Biomarkers	rs2519093	9	136141870	C	0.0464377	1.04753	0.00407634	4.58324e-30	linear	520598	NA	NA	2	0.0371126	80.3981	5.10155	0.0239045	na	HDL,TC,nonHDL
HDL_cholesterol	Blood Biomarkers	rs560117104	16	56393734	C	-0.0620996	0.939789	0.00545152	4.62348e-30	linear	508525	NA	NA	2	0	0	2.86846e-07	0.999573	na	HDL
LDL_cor	Blood Biomarkers	rs34003091	19	58662254	C	-0.0313702	0.969117	0.00275427	4.70955e-30	linear	491070	NA	NA	2	0.238712	91.9513	12.4243	0.000423782	SLC27A5	TC
Lymphocyte_percentage	Blood Biomarkers	rs5754217	22	21939675	T	-0.233691	0.791607	0.0205259	4.95916e-30	linear	528555	NA	NA	2	0.0667888	87.9308	8.28556	0.00399615	na	logTG
Total_bilirubin	Blood Biomarkers	rs440150	11	2936657	G	0.190651	1.21004	0.0167461	4.97722e-30	linear	537029	NA	NA	2	0.0573278	86.9423	7.65833	0.00565108	na	HDL
LDL_cor	Blood Biomarkers	rs17050272	2	121306440	A	-0.022336	0.977912	0.00196474	6.00581e-30	linear	494153	NA	NA	2	0.23177	95.5203	22.3229	2.30447e-06	na	LDL,TC,nonHDL
Mean_corpuscular_haemoglobin	Blood Biomarkers	rs17625587	1	198990494	A	-0.052506	0.948849	0.00462333	6.86427e-30	linear	547101	NA	NA	2	0	0	0.115674	0.733775	PTPRC	nonHDL
Hematuria	genitourinary	rs2517601	6	30074072	C	-0.119965	0.886952	0.0105652	7.02559e-30	logistic	707417	52097	655320	2	0.00219472	90.5566	10.5894	0.00113736	na	logTG
Haematocrit_percentage	Blood Biomarkers	rs2339718	12	111702646	G	-0.085301	0.918236	0.00751602	7.48266e-30	linear	548624	NA	NA	2	0	0	0.271659	0.602221	ATXN2	logTG
Glaucoma	sense organs	rs1033667	22	29130300	T	-0.0854001	0.918145	0.00752481	7.49024e-30	logistic	712469	58585	653884	2	0.000220884	56.307	2.28869	0.13032	TTC28	nonHDL
Albumin	Blood Biomarkers	rs10422861	19	33894846	T	-0.0730592	0.929546	0.00643815	7.60135e-30	linear	504298	NA	NA	2	0.000331192	8.39899	1.09169	0.296097	CEBPA	logTG
LDL_cor	Blood Biomarkers	rs35570672	8	18272635	C	-0.0264519	0.973895	0.00233164	7.87093e-30	linear	493778	NA	NA	2	0	0	0.816351	0.366249	na	TC
Lymphocyte_percentage	Blood Biomarkers	rs9884482	4	106081636	C	0.190026	1.20928	0.0167538	8.10237e-30	linear	528555	NA	NA	2	0	0	0.0345191	0.852607	na	HDL
Albumin	Blood Biomarkers	rs4805881	19	33896432	A	0.0729818	1.07571	0.00643485	8.16013e-30	linear	504607	NA	NA	2	0.000891044	20.0061	1.2501	0.263534	na	HDL
Glaucoma	sense organs	rs738722	22	29130012	T	-0.0818854	0.921377	0.00722015	8.19803e-30	logistic	712628	58587	654041	2	0.00010035	37.4234	1.59804	0.206181	na	logTG
Hypercholesterolemia	endocrine/metabolic	rs58542926	19	19379549	T	-0.102768	0.902336	0.00906582	8.7269e-30	logistic	712628	116844	595784	2	6.85094e-05	29.3012	1.41445	0.234319	na	LDL,TC,logTG,nonHDL
Monocyte_percentage	Blood Biomarkers	rs4760	19	44153100	G	0.0921933	1.09658	0.00813383	8.84875e-30	linear	530613	NA	NA	2	0	0	0.423365	0.515263	na	HDL
Ascites (non malignant)	digestive	rs3747207	22	44324855	A	0.224648	1.25188	0.0198202	8.8775e-30	logistic	711743	6935	704808	2	0.00718042	89.821	9.82414	0.00172236	na	LDL,nonHDL
HDL_cholesterol	Blood Biomarkers	rs4795393	17	37893484	C	-0.00976295	0.990285	0.0008617	9.33429e-30	linear	504559	NA	NA	2	0	0	0.0104741	0.918485	MED1	TC
Lymphocyte_percentage	Blood Biomarkers	rs11089629	22	21958872	G	-0.232494	0.792555	0.0205236	9.52111e-30	linear	528299	NA	NA	2	0.0743542	88.97	9.06621	0.00260377	na	HDL
Triglycerides	Blood Biomarkers	rs75265117	2	165518799	C	0.039613	1.04041	0.00349823	1.00107e-29	linear	541948	NA	NA	2	0.00199321	50.7245	2.02941	0.154281	COBLL1	HDL
Mean_platelet_thrombocyte_volume	Blood Biomarkers	rs1434282	1	199010721	C	-0.0309228	0.96955	0.00273086	1.00414e-29	linear	528521	NA	NA	2	0	0	0.990055	0.319729	PTPRC	LDL,TC
Hematuria	genitourinary	rs1233393	6	29549653	G	-0.124229	0.883178	0.010971	1.00521e-29	logistic	712468	52332	660136	2	0.00169331	87.3754	7.92102	0.00488636	na	logTG
Eosinophill_percentage	Blood Biomarkers	rs2057655	5	131807624	A	0.0604357	1.0623	0.00533759	1.01342e-29	linear	538677	NA	NA	2	0.00430942	35.36	1.54703	0.213574	IRF1	LDL
Haematocrit_percentage	Blood Biomarkers	rs2517601	6	30074072	C	-0.107299	0.898257	0.00947832	1.03933e-29	linear	545905	NA	NA	2	0.00798049	28.7449	1.40341	0.236154	na	logTG
HDL_cholesterol	Blood Biomarkers	rs7953014	12	109998097	A	-0.00931818	0.990725	0.000823234	1.05683e-29	linear	509841	NA	NA	2	0.00203792	74.4543	3.91455	0.0478699	ACACB	TC
LDL_cor	Blood Biomarkers	rs35246381	8	18272535	T	-0.0263457	0.973998	0.00232857	1.1172e-29	linear	493789	NA	NA	2	0	0	0.824153	0.363969	PCM1	logTG
Alanine_aminotransferase	Blood Biomarkers	rs12562207	1	16508059	G	-0.330687	0.71843	0.0292362	1.15946e-29	linear	543348	NA	NA	2	0.0214757	86.9999	7.69222	0.00554593	na	logTG
Triglycerides	Blood Biomarkers	rs9297994	8	59392324	A	-0.0271724	0.973193	0.0024026	1.17682e-29	linear	540096	NA	NA	2	0	0	0.330534	0.565345	CYP7A1	LDL,TC,nonHDL
Hyperlipidemia	endocrine/metabolic	rs6874202	5	156391628	T	-0.0527096	0.948655	0.0046616	1.20885e-29	logistic	712491	280250	432241	2	4.5706e-05	51.0542	2.04308	0.1529	na	LDL,TC,logTG,nonHDL
Hypothyroidism NOS	endocrine/metabolic	rs4804413	19	7222655	C	-0.0685961	0.933704	0.00606727	1.22667e-29	logistic	712090	66009	646081	2	0.000495081	86.227	7.26059	0.00704841	INSR	logTG
Essential hypertension	circulatory system	rs2306363	11	65405600	G	0.0569874	1.05864	0.00504136	1.25404e-29	logistic	710939	341007	369932	2	0.000127388	70.4649	3.3858	0.0657603	RELA	HDL
HDL_cholesterol	Blood Biomarkers	rs7134594	12	110000193	C	-0.00929735	0.990746	0.000823078	1.37598e-29	linear	509923	NA	NA	2	0.0019465	74.0092	3.84752	0.0498195	ACACB	LDL
LDL_cor	Blood Biomarkers	rs35662434	4	69339933	A	-0.0257588	0.97457	0.0022804	1.37681e-29	linear	493133	NA	NA	2	0.131485	88.3181	8.56022	0.00343588	na	HDL
Type 2 diabetes	endocrine/metabolic	rs7638903	3	12383714	A	-0.0808155	0.922364	0.00715553	1.40281e-29	logistic	712023	136854	575169	2	0	0	0.0431074	0.835523	PPARG	logTG
Hyperlipidemia	endocrine/metabolic	rs3208305	8	19823648	A	0.0560509	1.05765	0.00496419	1.45293e-29	logistic	712117	280200	431917	2	0	0	0.229352	0.632005	LPL	HDL
Triglycerides	Blood Biomarkers	rs11644601	16	15172118	T	0.0280357	1.02843	0.00248309	1.45943e-29	linear	540900	NA	NA	2	0	0	0.177031	0.673937	PDXDC1	HDL
LDL_cor	Blood Biomarkers	rs1495743	8	18273300	C	-0.0261306	0.974208	0.0023147	1.48728e-29	linear	494153	NA	NA	2	0	0	0.726575	0.393995	na	LDL
Rheumatoid arthritis	musculoskeletal	rs35282906	6	32657201	T	-0.194547	0.823207	0.0172405	1.56872e-29	logistic	712598	14728	697870	2	0	0	0.578103	0.447057	BRD2	LDL
Haemoglobin_concentration	Blood Biomarkers	rs77542162	17	67081278	A	-0.0829739	0.920375	0.0073553	1.632e-29	linear	550969	NA	NA	2	0	0	0.0853563	0.770166	ABCA5	LDL,TC,logTG,nonHDL
Triglycerides	Blood Biomarkers	rs1801689	17	64210580	A	0.0751696	1.07807	0.00666397	1.64759e-29	linear	542544	NA	NA	2	0	0	0.925156	0.336125	APOH	LDL,logTG
Gout	endocrine/metabolic	rs3812316	7	73020337	G	-0.141294	0.868234	0.0125338	1.78262e-29	logistic	712628	35905	676723	2	0.0010664	63.6686	2.75244	0.0971062	MLXIPL	logTG
White_blood_cell_leukocyte_count	Blood Biomarkers	rs7924036	10	65191645	T	-0.0520298	0.949301	0.00461655	1.83996e-29	linear	540731	NA	NA	2	0.00779121	50.7635	2.03101	0.154118	JMJD1C	logTG
HDL_cholesterol	Blood Biomarkers	rs2903809	20	44552895	A	0.0105547	1.01061	0.000936603	1.86431e-29	linear	508836	NA	NA	2	0	0	0.00280788	0.95774	PLTP	LDL
Angina pectoris	circulatory system	rs7528419	1	109817192	G	-0.0901135	0.913827	0.00799987	1.96753e-29	logistic	712628	53076	659552	2	0.000213209	62.0403	2.63437	0.104574	na	logTG
Neutrophill_count	Blood Biomarkers	rs7758845	6	135428537	C	-0.0400087	0.960781	0.0035529	2.04769e-29	linear	519615	NA	NA	2	9.20517e-05	1.22959	1.01245	0.314317	na	HDL
LDL_cor	Blood Biomarkers	rs6573778	14	24872209	C	-0.0220015	0.978239	0.00195459	2.15655e-29	linear	485328	NA	NA	2	0.0178021	61.7944	2.61742	0.105696	na	nonHDL
Hyperlipidemia	endocrine/metabolic	rs636523	1	62920008	G	-0.0556773	0.945844	0.00494902	2.31148e-29	logistic	711893	280180	431713	2	1.70862e-05	25.8591	1.34878	0.245491	ANGPTL3	LDL,logTG,nonHDL
Direct_bilirubin	Blood Biomarkers	rs3184504	12	111884608	T	0.0228506	1.02311	0.00203142	2.353e-29	linear	424476	NA	NA	2	0.000860066	41.9708	1.72327	0.189273	ALDH2	HDL
Albumin	Blood Biomarkers	rs36086195	1	16510894	C	-0.0691001	0.933233	0.0061438	2.39227e-29	linear	504361	NA	NA	2	0	0	0.144855	0.703501	na	LDL,TC,nonHDL
TC_cor	Blood Biomarkers	rs34042070	16	72101525	C	-0.0527438	0.948623	0.00469288	2.62023e-29	linear	490018	NA	NA	2	0.660458	96.6717	30.0457	4.21991e-08	HP	nonHDL
Mean_platelet_thrombocyte_volume	Blood Biomarkers	rs189392453	12	122381427	A	-0.0579345	0.943712	0.00515546	2.66818e-29	linear	519951	NA	NA	2	0	0	0.811891	0.367562	na	HDL
Red_blood_cell_erythrocyte_distribution_width	Blood Biomarkers	rs2980888	8	126507308	T	-0.0261526	0.974186	0.00232798	2.776e-29	linear	533427	NA	NA	2	0	0	0.297519	0.585442	TRIB1	HDL
Triglycerides	Blood Biomarkers	rs12928099	16	15150505	A	-0.0278741	0.972511	0.00248614	3.56909e-29	linear	541357	NA	NA	2	0	0	0.218604	0.640106	PDXDC1	logTG
Neutrophill_count	Blood Biomarkers	rs1292071	17	57926911	C	-0.0356167	0.96501	0.00317831	3.80341e-29	linear	519839	NA	NA	2	0.0182054	75.1363	4.02194	0.0449121	na	LDL,TC
Direct_bilirubin	Blood Biomarkers	rs653178	12	112007756	C	0.0227544	1.02302	0.00203121	3.96669e-29	linear	424476	NA	NA	2	0.000954405	44.539	1.80307	0.179342	ALDH2	LDL,TC,nonHDL
Triglycerides	Blood Biomarkers	rs8178824	17	64224775	C	0.0751649	1.07806	0.00671094	4.06087e-29	linear	542157	NA	NA	2	0	0	0.190866	0.662197	APOH	TC,nonHDL
White_blood_cell_leukocyte_count	Blood Biomarkers	rs1260326	2	27730940	C	-0.0528703	0.948503	0.00472114	4.14028e-29	linear	540877	NA	NA	2	0.019672	73.2741	3.74169	0.0530707	na	HDL,LDL,TC,logTG,nonHDL
Red_blood_cell_erythrocyte_distribution_width	Blood Biomarkers	rs1264377	6	30764907	A	0.0308839	1.03137	0.00275926	4.42223e-29	linear	533750	NA	NA	2	0.0109164	47.4094	1.90148	0.167913	na	HDL
Mean_platelet_thrombocyte_volume	Blood Biomarkers	rs2280334	2	66665146	C	-0.0289316	0.971483	0.00258532	4.52736e-29	linear	533561	NA	NA	2	0	0	0.0692156	0.792482	MEIS1	logTG
Triglycerides	Blood Biomarkers	rs6602909	13	114551993	T	-0.0270946	0.973269	0.00242329	5.05693e-29	linear	540719	NA	NA	2	0	0	0.17655	0.674355	GAS6	LDL,TC,logTG,nonHDL
Chronic venous insufficiency [CVI]	circulatory system	rs17764730	5	127357526	C	-0.131615	0.876678	0.0117748	5.24316e-29	logistic	709506	24107	685399	2	0	0	0.237304	0.62616	na	HDL
Mean_platelet_thrombocyte_volume	Blood Biomarkers	rs17625587	1	198990494	A	-0.0309066	0.969566	0.00276722	5.79363e-29	linear	529847	NA	NA	2	0	0	0.366236	0.545063	PTPRC	nonHDL
Occlusion and stenosis of precerebral arteries	circulatory system	rs10757273	9	22090301	A	0.106939	1.11287	0.00957611	5.90003e-29	logistic	686968	27926	659042	2	0.0018939	78.0648	4.55889	0.0327483	na	TC
Monocyte_percentage	Blood Biomarkers	rs142449754	6	41986427	T	0.0772329	1.08029	0.00691668	5.96938e-29	linear	529508	NA	NA	2	0	0	0.273345	0.601096	na	HDL
White_blood_cell_leukocyte_count	Blood Biomarkers	rs7916868	10	64988931	A	0.0516039	1.05296	0.00462234	6.11673e-29	linear	539826	NA	NA	2	0.0075667	50.5839	2.02363	0.154868	JMJD1C	HDL
Lymphocyte_percentage	Blood Biomarkers	rs5754102	22	21916272	A	-0.238956	0.78745	0.0214086	6.28004e-29	linear	519057	NA	NA	2	0.0815332	88.2828	8.53447	0.00348483	na	LDL
Open-angle glaucoma	sense organs	rs1333047	9	22124504	T	0.0846666	1.08835	0.00758703	6.44369e-29	logistic	711668	42508	669160	2	0.00423108	90.0899	10.0907	0.00149021	na	nonHDL
Mean_corpuscular_haemoglobin	Blood Biomarkers	rs9378248	6	31326289	G	0.0477992	1.04896	0.00428463	6.6963e-29	linear	549074	NA	NA	2	0.0649359	89.9744	9.97445	0.00158728	APOM	logTG
HbA1c	Blood Biomarkers	rs2203452	2	227094758	A	-0.160098	0.85206	0.014353	6.82012e-29	linear	504082	NA	NA	2	0.00682732	84.4124	6.41534	0.0113139	na	logTG
Celiac disease	digestive	rs113360274	6	29850784	A	0.375061	1.45508	0.0336273	6.88609e-29	logistic	712166	3755	708411	2	0	0	0.141286	0.707006	HLA-A	nonHDL
TC_cor	Blood Biomarkers	rs2000999	16	72108093	G	-0.0516735	0.949639	0.00463359	7.00677e-29	linear	494687	NA	NA	2	0.646636	96.6587	29.9285	4.48276e-08	na	logTG
HDL_cholesterol	Blood Biomarkers	rs2723509	7	17817037	G	0.0093454	1.00939	0.000838111	7.11673e-29	linear	508577	NA	NA	2	0	0	0.838492	0.359829	AHR	logTG
White_blood_cell_leukocyte_count	Blood Biomarkers	rs10761750	10	65128619	G	0.0515444	1.0529	0.00462319	7.23376e-29	linear	540797	NA	NA	2	0.0113184	60.738	2.54699	0.110504	JMJD1C	LDL
HDL_cholesterol	Blood Biomarkers	rs4947249	6	31302029	G	-0.00962107	0.990425	0.000863164	7.46577e-29	linear	499882	NA	NA	2	0	0	0.501515	0.478835	APOM	HDL
Essential hypertension	circulatory system	rs56094641	16	53806453	G	0.0459807	1.04705	0.00412551	7.53562e-29	logistic	712424	341398	371026	2	0.000871949	96.0565	25.3585	4.76049e-07	na	HDL
Monocyte_count	Blood Biomarkers	rs142449754	6	41986427	T	0.00632054	1.00634	0.000567375	8.01432e-29	linear	512361	NA	NA	2	0	0	0.674433	0.41151	na	HDL
Mean_corpuscular_haemoglobin	Blood Biomarkers	rs3128759	6	31885930	C	0.0461536	1.04724	0.00414516	8.53674e-29	linear	549265	NA	NA	2	0	0	0.0681783	0.794008	APOM	LDL,TC,nonHDL
LDL_cor	Blood Biomarkers	rs28689500	2	169831376	T	-0.0221834	0.978061	0.00199266	8.70972e-29	linear	489137	NA	NA	2	0	0	0.298227	0.584996	ABCB11	TC
Hypercholesterolemia	endocrine/metabolic	rs2297359	6	160492613	T	-0.203861	0.815576	0.0183152	8.89726e-29	logistic	712288	116808	595480	2	0.00845223	92.6222	13.5543	0.000231765	IGF2R	LDL
Triglycerides	Blood Biomarkers	rs56271783	11	64004723	C	0.0622823	1.06426	0.00559587	8.95748e-29	linear	539484	NA	NA	2	0.0198128	83.5479	6.07826	0.0136855	MARK2	HDL,logTG
HbA1c	Blood Biomarkers	rs2972145	2	227101309	C	0.159717	1.17318	0.014353	9.19472e-29	linear	503877	NA	NA	2	0.00664788	84.0755	6.27962	0.0122134	IRS1	HDL
Triglycerides	Blood Biomarkers	rs2921064	8	8316637	T	-0.0255298	0.974793	0.00229528	9.72308e-29	linear	534406	NA	NA	2	0	0	0.590813	0.442105	na	logTG
Coronary atherosclerosis	circulatory system	rs11591147	1	55505647	T	-0.225791	0.797884	0.0203042	9.97693e-29	logistic	712628	123318	589310	2	0.00106237	51.382	2.05685	0.151523	PCSK9	LDL,TC,nonHDL
Glucose	Blood Biomarkers	rs1260326	2	27730940	C	0.0323305	1.03286	0.00290829	1.0408e-28	linear	362053	NA	NA	2	0.00123419	36.9678	1.58649	0.207828	na	HDL,LDL,TC,logTG,nonHDL
HDL_cholesterol	Blood Biomarkers	rs10892870	11	122517803	A	-0.00940594	0.990638	0.000847092	1.2023e-28	linear	508114	NA	NA	2	0	0	0.107261	0.743285	na	HDL
White_blood_cell_leukocyte_count	Blood Biomarkers	rs2519093	9	136141870	C	0.0659978	1.06822	0.00594525	1.24146e-28	linear	540582	NA	NA	2	0.0193715	63.6114	2.74811	0.0973692	na	HDL,TC,nonHDL
Red_blood_cell_erythrocyte_count	Blood Biomarkers	rs9378248	6	31326289	G	-0.0092748	0.990768	0.00083632	1.40267e-28	linear	548945	NA	NA	2	0.0433509	85.8782	7.08126	0.00778944	APOM	logTG
White_blood_cell_leukocyte_count	Blood Biomarkers	rs507666	9	136149399	G	0.0658717	1.06809	0.005942	1.47075e-28	linear	540877	NA	NA	2	0.018133	62.1102	2.63923	0.104254	na	LDL
LDL_cor	Blood Biomarkers	rs10176901	2	169830661	A	-0.0219401	0.978299	0.00198046	1.59861e-28	linear	493816	NA	NA	2	0	0	0.299434	0.584237	na	LDL
Hyperplasia of prostate	genitourinary	rs13201681	6	28394680	T	-0.100194	0.904662	0.00904645	1.64981e-28	logistic	712587	127208	585379	2	0	0	0.909823	0.340161	TRIM27	logTG
Essential hypertension	circulatory system	rs62033400	16	53811788	A	-0.045806	0.955227	0.00413792	1.75768e-28	logistic	712006	341291	370715	2	0.000919061	96.2347	26.5583	2.55702e-07	na	logTG
HDL_cholesterol	Blood Biomarkers	rs600626	11	75455309	G	-0.0125481	0.98753	0.00113376	1.79936e-28	linear	509894	NA	NA	2	0	0	0.0867944	0.768293	na	HDL
Red_blood_cell_erythrocyte_distribution_width	Blood Biomarkers	rs35365035	19	17252151	T	-0.0241459	0.976143	0.00218172	1.80653e-28	linear	533750	NA	NA	2	0	0	0.617774	0.431876	MYO9B	TC
Haemoglobin_concentration	Blood Biomarkers	rs738408	22	44324730	T	0.0296272	1.03007	0.00267806	1.89821e-28	linear	550783	NA	NA	2	0	0	0.480323	0.488276	na	HDL,TC,logTG
HDL_cholesterol	Blood Biomarkers	rs2642438	1	220970028	A	-0.00995645	0.990093	0.000900658	2.08182e-28	linear	509923	NA	NA	2	0	0	0.00110238	0.973513	HLX	HDL,LDL,TC,logTG,nonHDL
Lymphocyte_percentage	Blood Biomarkers	rs2980888	8	126507308	T	0.195554	1.21599	0.0176944	2.14899e-28	linear	528232	NA	NA	2	0.00180174	19.9776	1.24965	0.263619	TRIB1	HDL
Eosinophill_percentage	Blood Biomarkers	rs7730247	5	131781288	C	0.0586907	1.06045	0.00531092	2.16909e-28	linear	538829	NA	NA	2	0.00611786	44.3067	1.79555	0.180252	IRF1	nonHDL
Mean_corpuscular_volume	Blood Biomarkers	rs221793	7	100280896	C	0.177618	1.19437	0.0160736	2.18618e-28	linear	546295	NA	NA	2	0	0	0.134075	0.714244	TSC22D4	LDL,TC,nonHDL
Hypothyroidism NOS	endocrine/metabolic	rs1264377	6	30764907	A	0.0861401	1.08996	0.00779626	2.21927e-28	logistic	712628	66030	646598	2	0.00064342	83.4252	6.03327	0.0140387	na	HDL
LDL_cor	Blood Biomarkers	rs13076933	3	12327431	G	-0.0246589	0.975643	0.00223349	2.43693e-28	linear	486766	NA	NA	2	0.0804761	84.276	6.3597	0.0116741	PPARG	LDL
HbA1c	Blood Biomarkers	rs2138157	2	227103717	A	-0.158636	0.853307	0.0143794	2.67381e-28	linear	503170	NA	NA	2	0.00654645	83.7916	6.16964	0.0129961	IRS1	nonHDL
Calculus of kidney	genitourinary	rs4976677	5	176629546	A	-0.104249	0.901001	0.00945155	2.74489e-28	logistic	712388	32962	679426	2	0	0	0.290809	0.589702	LMAN2	logTG
Haemoglobin_concentration	Blood Biomarkers	rs3747207	22	44324855	A	0.02964	1.03008	0.0026892	2.99811e-28	linear	550112	NA	NA	2	0	0	0.683249	0.40847	na	LDL,nonHDL
Hematuria	genitourinary	rs13201681	6	28394680	T	-0.126433	0.881233	0.0114732	3.06572e-28	logistic	712587	52336	660251	2	0.00154443	85.2418	6.77591	0.00923964	TRIM27	logTG
LDL_cor	Blood Biomarkers	rs66491446	2	169832362	A	-0.0220541	0.978187	0.00200211	3.22148e-28	linear	485961	NA	NA	2	0	0	0.278592	0.597626	na	nonHDL
Triglycerides	Blood Biomarkers	rs11635675	15	63793238	T	-0.0263056	0.974037	0.00238836	3.26691e-28	linear	540674	NA	NA	2	0.000976016	55.5897	2.25173	0.133465	HERC1	logTG
Altered mental status	mental disorders	rs483082	19	45416178	G	-0.13909	0.870149	0.0126328	3.4089e-28	logistic	710112	18076	692036	2	0.00297082	88.9512	9.05079	0.00262581	APOE	logTG
Hypothyroidism NOS	endocrine/metabolic	rs35282906	6	32657201	T	0.104858	1.11055	0.0095259	3.50916e-28	logistic	712598	66029	646569	2	0	0	0.0528304	0.818209	BRD2	LDL
Red_blood_cell_erythrocyte_count	Blood Biomarkers	rs6676150	1	155123837	C	-0.00894216	0.991098	0.000812428	3.54735e-28	linear	546254	NA	NA	2	0.0210352	73.7485	3.80931	0.0509686	na	TC
LDL_cor	Blood Biomarkers	rs1077835	15	58723426	A	-0.0257913	0.974538	0.00234324	3.54814e-28	linear	492292	NA	NA	2	0.0343759	68.2956	3.15413	0.075735	LIPC	logTG,nonHDL
Hypothyroidism NOS	endocrine/metabolic	rs35062987	6	32590735	C	0.083152	1.08671	0.00756105	3.93246e-28	logistic	712538	66027	646511	2	0	0	0.653684	0.418799	BRD2	TC
Hyperlipidemia	endocrine/metabolic	rs1883711	20	39179822	G	-0.166887	0.846295	0.0151875	4.34339e-28	logistic	709255	279806	429449	2	0.00108242	68.2891	3.15349	0.0757646	TOP1	LDL,TC,logTG,nonHDL
Hyperlipidemia	endocrine/metabolic	rs117199990	8	19820916	T	-0.0814852	0.921746	0.00741736	4.4755e-28	logistic	712463	280254	432209	2	5.4395e-05	32.76	1.48721	0.22265	LPL	logTG
Hyperlipidemia	endocrine/metabolic	rs2297359	6	160492613	T	-0.198249	0.820165	0.0180682	5.19347e-28	logistic	712288	280235	432053	2	0.0110397	94.3758	17.7804	2.47922e-05	IGF2R	LDL
Triglycerides	Blood Biomarkers	rs577721086	6	127440047	T	-0.0577402	0.943895	0.00526257	5.21773e-28	linear	539392	NA	NA	2	0	0	0.00374403	0.951209	na	logTG
Mean_corpuscular_volume	Blood Biomarkers	rs4955411	3	49145304	A	0.127872	1.13641	0.0116631	5.70508e-28	linear	550793	NA	NA	2	0	0	0.872823	0.350175	WDR6	logTG
Mean_platelet_thrombocyte_volume	Blood Biomarkers	rs3128759	6	31885930	C	0.0271619	1.02753	0.00247948	6.31114e-28	linear	532011	NA	NA	2	0	0	0.0247605	0.874965	APOM	LDL,TC,nonHDL
Triglycerides	Blood Biomarkers	rs62011285	15	63791063	T	-0.0261549	0.974184	0.00238963	7.0111e-28	linear	540467	NA	NA	2	0.000976451	55.6212	2.25333	0.133327	HERC1	TC,nonHDL
Monocyte_percentage	Blood Biomarkers	rs3808460	8	116597635	T	0.0654675	1.06766	0.00598236	7.14508e-28	linear	530084	NA	NA	2	0	0	0.180248	0.67116	na	HDL
Monocyte_count	Blood Biomarkers	rs622871	6	31878495	A	-0.00576857	0.994248	0.000527317	7.46267e-28	linear	505140	NA	NA	2	0	0	0.567985	0.451061	APOM	logTG
HDL_cholesterol	Blood Biomarkers	rs1689801	1	182165484	G	0.00957028	1.00962	0.000875008	7.63878e-28	linear	508671	NA	NA	2	0.00117093	58.9897	2.43841	0.118396	na	LDL,nonHDL
Triglycerides	Blood Biomarkers	rs9472125	6	43756169	T	-0.0440149	0.95694	0.00402613	8.07659e-28	linear	508556	NA	NA	2	0	0	0.812092	0.367503	VEGFA	LDL
LDL_cor	Blood Biomarkers	rs2844795	6	30073847	C	-0.0211448	0.979077	0.00193452	8.26077e-28	linear	494153	NA	NA	2	0.0382134	78.1505	4.57677	0.0324082	na	TC
Psoriasis vulgaris	dermatologic	rs3128759	6	31885930	C	-0.131298	0.876957	0.0120136	8.36921e-28	logistic	711035	16831	694204	2	0.00706871	93.9982	16.6617	4.46734e-05	APOM	LDL,TC,nonHDL
Direct_bilirubin	Blood Biomarkers	rs4418728	10	94839724	T	0.0222935	1.02254	0.00203993	8.41467e-28	linear	424119	NA	NA	2	0	0	0.382277	0.536387	na	HDL,TC,logTG,nonHDL
Glaucoma	sense organs	rs1333047	9	22124504	T	0.0712428	1.07384	0.00652044	8.65089e-28	logistic	711668	58557	653111	2	0.00064602	82.4349	5.69311	0.0170317	na	nonHDL
LDL_cor	Blood Biomarkers	rs2070895	15	58723939	G	-0.0255721	0.974752	0.00234076	8.78428e-28	linear	492994	NA	NA	2	0.0329631	67.4046	3.06791	0.0798519	LIPC	TC
White_blood_cell_leukocyte_count	Blood Biomarkers	rs2339718	12	111702646	G	-0.0583739	0.943297	0.00534852	9.87707e-28	linear	538526	NA	NA	2	0	0	0.583167	0.445073	ATXN2	logTG
HDL_cholesterol	Blood Biomarkers	rs1689797	1	182150978	A	-0.00955573	0.99049	0.00087557	9.911e-28	linear	508235	NA	NA	2	0.000729975	46.1037	1.85542	0.173155	na	HDL
BMI	Physical Measures	rs62136856	19	47573527	A	-0.111479	0.89451	0.0102165	1.01338e-27	linear	563004	NA	NA	2	2.06786e-05	6.63764	1.0711	0.300698	na	logTG
Obesity	endocrine/metabolic	rs6567160	18	57829135	C	0.060025	1.06186	0.00550826	1.18782e-27	logistic	712301	153652	558649	2	0.000391441	83.3875	6.01957	0.0141481	na	HDL
Triglycerides	Blood Biomarkers	rs141783576	6	127439897	G	-0.0496851	0.951529	0.00456034	1.21698e-27	linear	534309	NA	NA	2	0	0	0.187885	0.664683	na	nonHDL
Neutrophill_percentage	Blood Biomarkers	rs55709272	2	113867288	C	0.204692	1.22715	0.0187963	1.28568e-27	linear	513665	NA	NA	2	0.00414167	40.6206	1.68409	0.194382	na	logTG
Red_blood_cell_erythrocyte_distribution_width	Blood Biomarkers	rs2517601	6	30074072	C	0.033884	1.03446	0.00311322	1.37535e-27	linear	528680	NA	NA	2	0	0	0.713262	0.398363	na	logTG
Hypercholesterolemia	endocrine/metabolic	rs2519093	9	136141870	C	-0.0638051	0.938188	0.00586305	1.39571e-27	logistic	712322	116807	595515	2	0	0	0.741204	0.389275	na	HDL,TC,nonHDL
LDL_cor	Blood Biomarkers	rs189671	2	62959308	A	-0.0228473	0.977412	0.00210102	1.52704e-27	linear	491080	NA	NA	2	0.14485	91.7115	12.0649	0.000513812	na	nonHDL
TC_cor	Blood Biomarkers	rs1800978	9	107665978	G	-0.0604756	0.941317	0.00556137	1.52952e-27	linear	492367	NA	NA	2	0.415809	91.2341	11.4078	0.000731363	ABCA1	logTG
Direct_bilirubin	Blood Biomarkers	rs2068888	10	94839642	A	0.0221363	1.02238	0.00203917	1.8776e-27	linear	424476	NA	NA	2	0.00134333	52.7397	2.11594	0.145772	CYP26A1	LDL
Nodular lymphoma	neoplasms	rs35282906	6	32657201	T	-0.522228	0.593198	0.0481121	1.90056e-27	logistic	712598	1483	711115	2	0.0384892	88.8524	8.97052	0.00274371	BRD2	LDL
Red_blood_cell_erythrocyte_distribution_width	Blood Biomarkers	rs7284873	22	30914473	T	0.0272225	1.0276	0.00250965	2.0579e-27	linear	533596	NA	NA	2	0.00135741	12.3121	1.14041	0.285566	na	HDL
TC_cor	Blood Biomarkers	rs483082	19	45416178	G	0.0463022	1.04739	0.00427164	2.23855e-27	linear	492296	NA	NA	2	0	0	0.18163	0.669976	APOE	logTG
LDL_cor	Blood Biomarkers	rs2524143	6	31263510	T	-0.0228151	0.977443	0.00210494	2.2533e-27	linear	492842	NA	NA	2	0	0	0.7777	0.377846	APOM	TC
TC_cor	Blood Biomarkers	rs35282906	6	32657201	T	-0.0603757	0.941411	0.00557075	2.27426e-27	linear	494659	NA	NA	2	0.517314	93.5831	15.5838	7.8926e-05	BRD2	LDL
LDL_cor	Blood Biomarkers	rs116734477	5	52095024	T	-0.0529017	0.948473	0.00488152	2.29535e-27	linear	493773	NA	NA	2	0.460976	82.0728	5.5781	0.0181864	na	LDL,TC
Triglycerides	Blood Biomarkers	rs73728888	6	32596370	T	0.0641781	1.06628	0.00592247	2.31469e-27	linear	542400	NA	NA	2	0.00721351	54.1134	2.17928	0.13988	BRD2	HDL
LDL_cor	Blood Biomarkers	rs115018790	5	52088271	A	-0.052849	0.948523	0.00487932	2.4483e-27	linear	493796	NA	NA	2	0.485541	82.6272	5.75613	0.0164312	ITGA1	nonHDL
BMI	Physical Measures	rs17615494	2	58950363	G	-0.111937	0.8941	0.0103358	2.48135e-27	linear	556097	NA	NA	2	0	0	0.762545	0.382533	na	logTG
Mean_corpuscular_haemoglobin	Blood Biomarkers	rs3768321	1	40035928	T	-0.0551312	0.946361	0.0050907	2.48768e-27	linear	549579	NA	NA	2	0	0	0.76555	0.381597	PABPC4	HDL,logTG
Coronary atherosclerosis	circulatory system	rs10846744	12	125312425	G	-0.0735932	0.92905	0.0067967	2.54257e-27	logistic	712628	123318	589310	2	0	0	0.750118	0.386439	na	LDL,logTG,nonHDL
BMI	Physical Measures	rs6509311	19	47585240	G	0.111015	1.11741	0.0102536	2.56622e-27	linear	563452	NA	NA	2	0	0	0.758869	0.383683	na	HDL
Hypercholesterolemia	endocrine/metabolic	rs507666	9	136149399	G	-0.0634259	0.938544	0.00585859	2.58837e-27	logistic	712628	116844	595784	2	0	0	0.705335	0.400997	na	LDL
LDL_cor	Blood Biomarkers	rs1229984	4	100239319	T	-0.0707291	0.931714	0.00653479	2.66501e-27	linear	494153	NA	NA	2	0	0	0.161712	0.687585	MTTP	nonHDL
Polycythemia, secondary	hematopoietic	rs80215559	6	25918225	C	0.404938	1.49921	0.037433	2.83877e-27	logistic	712628	4280	708348	2	0	0	0.432825	0.510606	na	LDL,TC,nonHDL
Haematocrit_percentage	Blood Biomarkers	rs1321505	6	28052823	C	-0.0973719	0.907219	0.00900185	2.86384e-27	linear	550970	NA	NA	2	0.0470529	73.2427	3.7373	0.0532104	ZKSCAN4	HDL
HDL_cholesterol	Blood Biomarkers	rs465002	5	55808475	T	-0.0102183	0.989834	0.000944927	2.96058e-27	linear	509779	NA	NA	2	0.00591507	86.0956	7.19196	0.00732308	na	HDL
Type 2 diabetes	endocrine/metabolic	rs465002	5	55808475	T	0.0592899	1.06108	0.00548291	2.96868e-27	logistic	712459	136878	575581	2	0	0	0.189031	0.663724	na	HDL
Vitamin B-complex deficiencies	endocrine/metabolic	rs838133	19	49259529	G	0.115025	1.1219	0.0106385	3.01552e-27	logistic	664234	23961	640273	2	0	0	0.446162	0.504163	na	logTG
Albumin	Blood Biomarkers	rs10184004	2	165508389	T	-0.0666894	0.935486	0.00616847	3.0419e-27	linear	504778	NA	NA	2	0.00987794	74.612	3.93888	0.0471823	na	LDL,TC,nonHDL
Haemoglobin_concentration	Blood Biomarkers	rs13107325	4	103188709	C	-0.0455138	0.955506	0.00421231	3.26188e-27	linear	550969	NA	NA	2	0.155997	85.3083	6.80655	0.00908241	na	HDL,LDL,TC,logTG
Gout	endocrine/metabolic	rs6676150	1	155123837	C	0.0894045	1.09352	0.00827566	3.32013e-27	logistic	708050	35827	672223	2	0	0	0.774276	0.378897	na	TC
Atherosclerosis of the extremities	circulatory system	rs10757273	9	22090301	A	0.168147	1.18311	0.0155653	3.34294e-27	logistic	686968	9661	677307	2	0.00146714	62.3888	2.65879	0.102979	na	TC
LDL_cor	Blood Biomarkers	rs1800961	20	43042364	T	-0.059815	0.941939	0.00553908	3.4903e-27	linear	494153	NA	NA	2	0.030311	25.3965	1.34042	0.24696	HNF4A	HDL,LDL,TC,nonHDL
Neutrophill_count	Blood Biomarkers	rs881844	17	37810218	C	0.0361964	1.03686	0.00335273	3.59239e-27	linear	520229	NA	NA	2	0.00613249	48.0641	1.92545	0.165257	na	HDL
Red_blood_cell_erythrocyte_count	Blood Biomarkers	rs80215559	6	25918225	C	-0.015968	0.984159	0.00148037	3.9885e-27	linear	550686	NA	NA	2	0.737415	96.2512	26.6749	2.40723e-07	na	LDL,TC,nonHDL
LDL_cor	Blood Biomarkers	rs9298506	8	55437524	A	-0.025593	0.974732	0.00237394	4.24038e-27	linear	494153	NA	NA	2	0	0	0.269682	0.603545	na	LDL
HDL_cholesterol	Blood Biomarkers	rs12369179	12	122963550	T	-0.0154829	0.984636	0.00143683	4.48075e-27	linear	507948	NA	NA	2	0	0	0.0704839	0.790633	na	HDL
Eosinophill_percentage	Blood Biomarkers	rs137859889	5	141542219	G	0.049488	1.05073	0.00459352	4.59551e-27	linear	534342	NA	NA	2	0	0	0.148216	0.700246	na	HDL
Hematuria	genitourinary	rs622871	6	31878495	A	-0.079382	0.923687	0.00737019	4.73478e-27	logistic	704049	51968	652081	2	0.000650382	85.1897	6.75205	0.00936403	APOM	logTG
Coronary atherosclerosis	circulatory system	rs28601761	8	126500031	G	-0.0551149	0.946376	0.00512117	5.19327e-27	logistic	693871	122063	571808	2	0.000162042	72.1925	3.59616	0.0579133	na	LDL,TC,logTG,nonHDL
Neutrophill_percentage	Blood Biomarkers	rs2305637	3	47045846	T	0.261868	1.29935	0.0243332	5.21705e-27	linear	516992	NA	NA	2	0.00223691	18.3977	1.22546	0.268293	na	HDL
Cancer of prostate	neoplasms	rs4449583	5	1284135	T	-0.0838298	0.919588	0.00779253	5.45044e-27	logistic	705472	44997	660475	2	0	0	0.962416	0.326579	na	HDL
LDL_cor	Blood Biomarkers	rs368213791	13	32976656	G	-0.0215221	0.978708	0.00200121	5.64126e-27	linear	468278	NA	NA	2	0.0243799	67.1245	3.04178	0.0811471	na	LDL,TC,nonHDL
LDL_cor	Blood Biomarkers	rs28503706	8	55441799	A	-0.0255258	0.974797	0.00237409	5.80944e-27	linear	494136	NA	NA	2	0	0	0.223114	0.636677	SOX17	nonHDL
Hyperlipidemia	endocrine/metabolic	rs10096633	8	19830921	T	-0.0723185	0.930235	0.00673869	7.21549e-27	logistic	712628	280273	432355	2	0	0	0.552855	0.457154	LPL	nonHDL
Direct_bilirubin	Blood Biomarkers	rs10761750	10	65128619	G	0.0218222	1.02206	0.00203418	7.54293e-27	linear	424407	NA	NA	2	0.00703696	84.8829	6.61504	0.0101121	JMJD1C	LDL
LDL_cor	Blood Biomarkers	rs10104003	8	55422440	C	-0.0254631	0.974858	0.00237428	7.80574e-27	linear	494124	NA	NA	2	0	0	0.221704	0.637745	na	TC
BMI	Physical Measures	rs6499240	16	69686912	A	-0.102102	0.902938	0.00952143	7.90887e-27	linear	560196	NA	NA	2	0	0	0.679747	0.409674	NFAT5	logTG
Hypothyroidism NOS	endocrine/metabolic	rs73728888	6	32596370	T	-0.190884	0.826229	0.0178029	8.02235e-27	logistic	712476	66021	646455	2	0.00577014	89.6059	9.62086	0.0019238	BRD2	HDL
LDL_cor	Blood Biomarkers	rs3208305	8	19823648	A	0.0229761	1.02324	0.00214338	8.24019e-27	linear	493668	NA	NA	2	0.0210226	62.11	2.63922	0.104255	LPL	HDL
Red_blood_cell_erythrocyte_distribution_width	Blood Biomarkers	rs2409663	8	10643233	T	-0.0232006	0.977066	0.00216433	8.24182e-27	linear	531668	NA	NA	2	0	0	0.903238	0.341915	na	LDL
Thyrotoxicosis with or without goiter	endocrine/metabolic	rs1264347	6	30798697	T	0.234211	1.26391	0.021857	8.59778e-27	logistic	695156	8375	686781	2	0.0242439	96.1041	25.6679	4.05507e-07	na	logTG
LDL_cor	Blood Biomarkers	rs622871	6	31878495	A	-0.0224533	0.977797	0.00209617	8.98076e-27	linear	485982	NA	NA	2	0	0	0.347268	0.555664	APOM	logTG
Albumin	Blood Biomarkers	rs12562207	1	16508059	G	-0.0668702	0.935317	0.00624909	1.00914e-26	linear	505122	NA	NA	2	0	0	0.000840585	0.97687	na	logTG
Alanine_aminotransferase	Blood Biomarkers	rs2972145	2	227101309	C	0.317398	1.37355	0.0296729	1.05612e-26	linear	543275	NA	NA	2	0.00856605	71.9595	3.56627	0.0589645	IRS1	HDL
Haematocrit_percentage	Blood Biomarkers	rs1264377	6	30764907	A	-0.0898242	0.914092	0.00839888	1.07669e-26	linear	550975	NA	NA	2	0.0493131	77.7429	4.49295	0.0340349	na	HDL
HDL_cholesterol	Blood Biomarkers	rs114165349	1	27021913	G	0.0294556	1.02989	0.00275429	1.0805e-26	linear	509234	NA	NA	2	0.00703793	41.2503	1.70214	0.192009	NR0B2	LDL,TC,logTG,nonHDL
Other chronic ischemic heart disease, unspecified	circulatory system	rs7412	19	45412079	T	-0.109181	0.896568	0.0102105	1.09709e-26	logistic	712628	88686	623942	2	0.00114584	81.8532	5.51061	0.0189014	APOE	LDL,TC,nonHDL
Triglycerides	Blood Biomarkers	rs2071805	6	32441696	C	-0.0630901	0.938859	0.00590131	1.12318e-26	linear	542540	NA	NA	2	0.00180828	31.3538	1.45675	0.227449	BRD2	logTG
Triglycerides	Blood Biomarkers	rs41272086	6	161008646	G	-0.0393042	0.961458	0.00367763	1.16629e-26	linear	541722	NA	NA	2	0	0	0.251541	0.615992	IGF2R	HDL,logTG
Gout	endocrine/metabolic	rs760077	1	155178782	A	0.0858694	1.08966	0.00803697	1.20561e-26	logistic	712628	35905	676723	2	0	0	0.169191	0.680832	na	nonHDL
LDL_cor	Blood Biomarkers	rs360804	2	62939397	A	-0.022595	0.977658	0.00211503	1.22172e-26	linear	490088	NA	NA	2	0.123342	90.3136	10.3237	0.00131332	na	LDL
Essential hypertension	circulatory system	rs10750766	11	65473798	C	-0.0479277	0.953203	0.00448693	1.24104e-26	logistic	710353	340833	369520	2	0	0	0.721649	0.395604	RELA	logTG
Triglycerides	Blood Biomarkers	rs1077835	15	58723426	A	-0.0293099	0.971115	0.0027446	1.27486e-26	linear	540681	NA	NA	2	0.00469857	81.4909	5.40276	0.0201049	LIPC	logTG,nonHDL
HDL_cholesterol	Blood Biomarkers	rs11925192	3	50038664	A	-0.00880926	0.991229	0.000824993	1.29047e-26	linear	509900	NA	NA	2	0.004225	85.4797	6.88692	0.00868286	na	HDL
Haematocrit_percentage	Blood Biomarkers	rs3118362	6	28785085	C	0.11731	1.12447	0.0109921	1.37261e-26	linear	550975	NA	NA	2	0	0	0.137364	0.710916	TRIM27	LDL,TC,nonHDL
Red_blood_cell_erythrocyte_distribution_width	Blood Biomarkers	rs1233393	6	29549653	G	0.0339028	1.03448	0.00317695	1.38398e-26	linear	533599	NA	NA	2	0	0	0.0657192	0.797675	na	logTG
Triglycerides	Blood Biomarkers	rs41274050	10	52573772	C	-0.120601	0.886388	0.0113024	1.40075e-26	linear	542544	NA	NA	2	0	0	0.305813	0.580261	A1CF	LDL,TC,logTG,nonHDL
Triglycerides	Blood Biomarkers	rs2070895	15	58723939	G	-0.0292589	0.971165	0.00274243	1.42201e-26	linear	541383	NA	NA	2	0.00450103	80.8525	5.22262	0.0222949	LIPC	TC
Alanine_aminotransferase	Blood Biomarkers	rs2203452	2	227094758	A	-0.316552	0.728657	0.029683	1.49323e-26	linear	543477	NA	NA	2	0.00857258	71.9527	3.56541	0.0589953	na	logTG
Atrial fibrillation	circulatory system	rs2540949	2	65284231	A	0.0774184	1.08049	0.00725951	1.49332e-26	logistic	711293	52148	659145	2	0	0	0.229093	0.632197	na	HDL
LDL_cor	Blood Biomarkers	rs78784525	2	62978981	T	-0.0224572	0.977793	0.00210607	1.51514e-26	linear	489910	NA	NA	2	0.141045	91.3654	11.5813	0.000666186	na	TC
White_blood_cell_leukocyte_count	Blood Biomarkers	rs1292071	17	57926911	C	-0.0494238	0.951778	0.00463721	1.59858e-26	linear	539822	NA	NA	2	0.0346678	82.3824	5.67613	0.0171973	na	LDL,TC
Eosinophill_percentage	Blood Biomarkers	rs2339718	12	111702646	G	-0.0509681	0.950309	0.0047835	1.65283e-26	linear	538686	NA	NA	2	0	0	0.340813	0.55936	ATXN2	logTG
Eosinophill_percentage	Blood Biomarkers	rs9378248	6	31326289	G	-0.0466181	0.954452	0.0043756	1.66825e-26	linear	539295	NA	NA	2	0.0605651	91.9797	12.4684	0.000413888	APOM	logTG
Type 2 diabetes	endocrine/metabolic	rs35895680	17	47060322	C	0.0555421	1.05711	0.00521454	1.71775e-26	logistic	703562	136256	567306	2	0	0	0.324397	0.568977	na	HDL
Triglycerides	Blood Biomarkers	rs3758669	11	47272579	G	-0.0262019	0.974138	0.00246104	1.80699e-26	linear	542419	NA	NA	2	0	0	0.720956	0.395831	NR1H3	logTG
Monocyte_count	Blood Biomarkers	rs7776054	6	135418916	G	-0.00587307	0.994144	0.000552089	1.98543e-26	linear	512179	NA	NA	2	0	0	0.771543	0.37974	na	LDL,TC,nonHDL
Monocyte_count	Blood Biomarkers	rs1321505	6	28052823	C	-0.00716697	0.992859	0.000674028	2.09185e-26	linear	513461	NA	NA	2	0.0165251	56.8387	2.31689	0.127976	ZKSCAN4	HDL
Alanine_aminotransferase	Blood Biomarkers	rs2138157	2	227103717	A	-0.316142	0.728956	0.0297359	2.12314e-26	linear	542572	NA	NA	2	0.00992562	74.7303	3.9573	0.0466684	IRS1	nonHDL
Type 2 diabetes	endocrine/metabolic	rs75265117	2	165518799	C	0.0816715	1.0851	0.00768336	2.1692e-26	logistic	712000	136856	575144	2	0	0	0.160131	0.689036	COBLL1	HDL
TC_cor	Blood Biomarkers	rs77303550	16	72079657	T	-0.0489256	0.952252	0.00460417	2.24662e-26	linear	493159	NA	NA	2	0.378856	93.425	15.2092	9.62326e-05	AP1G1	LDL,TC
HDL_cholesterol	Blood Biomarkers	rs7129071	11	122527120	G	-0.00907383	0.990967	0.00085395	2.26271e-26	linear	509152	NA	NA	2	0	0	0.402264	0.525922	na	nonHDL
HDL_cholesterol	Blood Biomarkers	rs75460349	1	27180088	C	-0.0292948	0.97113	0.00275778	2.33947e-26	linear	508650	NA	NA	2	0.00914013	54.2637	2.18645	0.13923	ARID1A	HDL
Triglycerides	Blood Biomarkers	rs4320509	8	11528339	G	-0.0366406	0.964023	0.003454	2.73055e-26	linear	527186	NA	NA	2	0.000735251	29.4234	1.4169	0.233914	GATA4	logTG
Triglycerides	Blood Biomarkers	rs3758673	11	47278917	C	0.026098	1.02644	0.00246074	2.80125e-26	linear	542529	NA	NA	2	0	0	0.754554	0.385038	NR1H3	HDL
Alanine_aminotransferase	Blood Biomarkers	rs483082	19	45416178	G	0.356021	1.42764	0.0335746	2.85884e-26	linear	541187	NA	NA	2	0.0473683	91.4689	11.7218	0.000617716	APOE	logTG
Monocyte_percentage	Blood Biomarkers	rs2524143	6	31263510	T	0.0683824	1.07077	0.00645405	3.13461e-26	linear	529270	NA	NA	2	0.0130894	63.4573	2.73653	0.0980778	APOM	TC
Benign neoplasm of other parts of digestive system	neoplasms	rs760077	1	155178782	A	-0.123239	0.884053	0.0116334	3.19412e-26	logistic	712628	16396	696232	2	0.00182751	86.5906	7.45744	0.00631748	na	nonHDL
Obesity	endocrine/metabolic	rs7187333	16	28865916	A	0.049766	1.05103	0.00470282	3.6053e-26	logistic	712507	153664	558843	2	0	0	0.61459	0.433065	ATXN2L	HDL
Hypothyroidism NOS	endocrine/metabolic	rs12575636	11	95311260	G	0.0781419	1.08128	0.00738954	3.90592e-26	logistic	710208	65882	644326	2	0.0018719	94.0277	16.7439	4.27789e-05	na	HDL
Chronic venous insufficiency [CVI]	circulatory system	rs7734927	5	127453735	T	0.118828	1.12618	0.0112414	4.07812e-26	logistic	711992	24110	687882	2	0	0	0.1423	0.706006	SLC12A2	logTG
Triglycerides	Blood Biomarkers	rs114165349	1	27021913	G	-0.0800236	0.923095	0.00757161	4.15294e-26	linear	541798	NA	NA	2	0	0	0.585779	0.444056	NR0B2	LDL,TC,logTG,nonHDL
Other disorders of liver	digestive	rs738408	22	44324730	T	0.155106	1.16778	0.0146861	4.49844e-26	logistic	712434	13093	699341	2	0.00385152	87.0806	7.74028	0.00540024	na	HDL,TC,logTG
HDL_cholesterol	Blood Biomarkers	rs7930518	11	122523596	G	-0.00897448	0.991066	0.000850195	4.77608e-26	linear	508982	NA	NA	2	0	0	0.614767	0.432999	na	LDL,TC
HDL_cholesterol	Blood Biomarkers	rs34514836	19	46385438	C	-0.0134444	0.986646	0.00127374	4.81393e-26	linear	508948	NA	NA	2	0	0	0.354795	0.551412	na	HDL
HDL_cholesterol	Blood Biomarkers	rs59391722	22	21920817	C	-0.0110907	0.988971	0.00105137	5.14711e-26	linear	509679	NA	NA	2	0	0	0.670431	0.412902	na	TC
Neutrophill_percentage	Blood Biomarkers	rs13398728	2	113842506	C	0.200722	1.22228	0.0190368	5.42213e-26	linear	516632	NA	NA	2	0.00309045	33.4136	1.50181	0.220393	na	nonHDL
Red_blood_cell_erythrocyte_count	Blood Biomarkers	rs1529585	3	69870595	A	-0.00839141	0.991644	0.000796263	5.74119e-26	linear	549977	NA	NA	2	0	0	0.854591	0.355257	na	logTG
Calcium	Blood Biomarkers	rs10469298	19	50024391	A	0.00301445	1.00302	0.000286089	5.84841e-26	linear	376318	NA	NA	2	0.00586671	34.0345	1.51594	0.218234	na	HDL
Triglycerides	Blood Biomarkers	rs35980001	15	58722590	G	-0.0294802	0.97095	0.00279932	6.20352e-26	linear	535301	NA	NA	2	0.00556027	83.5055	6.06263	0.0138072	LIPC	LDL
Neutrophill_percentage	Blood Biomarkers	rs6734238	2	113841030	G	0.199051	1.22024	0.018906	6.38805e-26	linear	516992	NA	NA	2	0.00177906	23.0238	1.2991	0.254377	na	LDL,TC
Haemoglobin_concentration	Blood Biomarkers	rs2800708	6	127437617	T	0.0233002	1.02357	0.00221508	7.06739e-26	linear	549410	NA	NA	2	0	0	0.239111	0.624849	na	HDL
TC_cor	Blood Biomarkers	rs10455872	6	161010118	A	-0.0700288	0.932367	0.00665851	7.19848e-26	linear	494687	NA	NA	2	1.1968	95.7276	23.4059	1.31174e-06	PLG	LDL,nonHDL
Neutrophill_count	Blood Biomarkers	rs4947249	6	31302029	G	-0.0348538	0.965747	0.00331507	7.4661e-26	linear	509740	NA	NA	2	0	0	3.09535e-05	0.995561	APOM	HDL
Type 2 diabetes	endocrine/metabolic	rs6499240	16	69686912	A	-0.0516549	0.949657	0.00491644	8.05785e-26	logistic	709101	136662	572439	2	0.000179686	75.5171	4.08448	0.0432788	NFAT5	logTG
LDL_cor	Blood Biomarkers	rs1800978	9	107665978	G	-0.0311361	0.969344	0.00296388	8.17612e-26	linear	491832	NA	NA	2	0	0	0.0934835	0.759794	ABCA1	logTG
Alanine_aminotransferase	Blood Biomarkers	rs132644	22	36545826	C	0.386871	1.47237	0.0368344	8.36952e-26	linear	543067	NA	NA	2	0.0784945	93.8858	16.3553	5.25088e-05	na	LDL,TC
Triglycerides	Blood Biomarkers	rs2800708	6	127437617	T	0.0238598	1.02415	0.00227242	8.66182e-26	linear	541017	NA	NA	2	0.000373867	33.0686	1.49407	0.221586	na	HDL
LDL_cor	Blood Biomarkers	rs261291	15	58680178	T	-0.0212313	0.978993	0.0020229	9.06485e-26	linear	492729	NA	NA	2	0.000166612	1.3731	1.01392	0.313965	na	HDL
Triglycerides	Blood Biomarkers	rs1711171	3	136020541	T	-0.0275622	0.972814	0.00262641	9.1805e-26	linear	539857	NA	NA	2	0.00517074	82.7636	5.80169	0.0160108	STAG1	LDL
Albumin	Blood Biomarkers	rs4077194	1	178533832	T	0.063799	1.06588	0.00608313	9.82177e-26	linear	504768	NA	NA	2	0.00229789	41.2894	1.70327	0.191861	na	HDL
HDL_cholesterol	Blood Biomarkers	rs140490	22	21921686	T	-0.0109498	0.98911	0.00104478	1.0627e-25	linear	509688	NA	NA	2	0	0	0.351127	0.553476	YDJC	nonHDL
Hematuria	genitourinary	rs56254331	19	41826020	A	0.0964708	1.10128	0.00921264	1.16684e-25	logistic	712346	52323	660023	2	7.1336e-05	28.7957	1.40441	0.235987	TGFB1	HDL
HDL_cholesterol	Blood Biomarkers	rs79949326	7	6461310	C	-0.00984468	0.990204	0.000940559	1.22673e-25	linear	508538	NA	NA	2	0	0	0.456232	0.49939	KDELR2	HDL,TC
Neutrophill_percentage	Blood Biomarkers	rs2980888	8	126507308	T	-0.212316	0.808709	0.0202907	1.26831e-25	linear	516669	NA	NA	2	0.0426171	85.6592	6.97312	0.00827432	TRIB1	HDL
Mean_corpuscular_volume	Blood Biomarkers	rs6120879	20	30202961	C	0.139655	1.14988	0.0133495	1.29858e-25	linear	549197	NA	NA	2	0	0	3.65531e-05	0.995176	HM13	logTG
Red_blood_cell_erythrocyte_distribution_width	Blood Biomarkers	rs7007256	8	26203081	G	-0.0246401	0.975661	0.00235614	1.34952e-25	linear	532741	NA	NA	2	0	0	0.530306	0.466478	na	logTG
LDL_cor	Blood Biomarkers	rs1107850	2	20371772	A	-0.0203075	0.979897	0.00194236	1.38882e-25	linear	492091	NA	NA	2	0.0380203	77.6894	4.48217	0.0342501	SDC1	logTG
Urea	Blood Biomarkers	rs11172134	12	57645789	A	-0.0395263	0.961245	0.00378243	1.46568e-25	linear	540092	NA	NA	2	0	0	0.519717	0.470962	na	LDL
Calcium	Blood Biomarkers	rs6676150	1	155123837	C	0.00237787	1.00238	0.000227568	1.48009e-25	linear	372947	NA	NA	2	0.0319606	82.6813	5.77409	0.0162641	na	TC
Lymphocyte_percentage	Blood Biomarkers	rs28601761	8	126500031	G	-0.175406	0.839116	0.0167895	1.50632e-25	linear	510384	NA	NA	2	0	0	0.959041	0.327429	na	LDL,TC,logTG,nonHDL
Polycythemia vera	neoplasms	rs80215559	6	25918225	C	0.469782	1.59965	0.0449673	1.50934e-25	logistic	712628	2794	709834	2	0.0107485	67.6309	3.08937	0.0788053	na	LDL,TC,nonHDL
Other disorders of liver	digestive	rs3747207	22	44324855	A	0.154953	1.1676	0.0148328	1.51713e-25	logistic	711743	13084	698659	2	0.0039907	87.3318	7.89378	0.00496051	na	LDL,nonHDL
Albumin	Blood Biomarkers	rs2723509	7	17817037	G	-0.0643991	0.937631	0.0061694	1.65462e-25	linear	503983	NA	NA	2	0.00366735	50.8374	2.03406	0.153809	AHR	logTG
Total_bilirubin	Blood Biomarkers	rs73362918	10	122853958	G	-0.177993	0.836949	0.0170518	1.65697e-25	linear	539991	NA	NA	2	0	0	0.0124045	0.911319	FGFR2	TC
Multiple sclerosis	neurological	rs2524143	6	31263510	T	0.249134	1.28291	0.0238681	1.6634e-25	logistic	711244	4120	707124	2	0.00382327	76.794	4.30924	0.0379059	APOM	TC
Mean_corpuscular_volume	Blood Biomarkers	rs6120890	20	30207659	T	-0.139483	0.869808	0.0133673	1.72189e-25	linear	548650	NA	NA	2	0	0	0.0134275	0.90775	na	HDL
Mean_corpuscular_haemoglobin	Blood Biomarkers	rs140490	22	21921686	T	-0.0534933	0.947912	0.00512737	1.75451e-25	linear	550541	NA	NA	2	0	0	0.592632	0.441403	YDJC	nonHDL
Mean_platelet_thrombocyte_volume	Blood Biomarkers	rs17853159	1	45810865	A	-0.046184	0.954866	0.00442682	1.75659e-25	linear	533561	NA	NA	2	0.0166042	42.5626	1.74102	0.187009	na	LDL
LDL_cor	Blood Biomarkers	rs7640978	3	32533010	T	-0.0353268	0.96529	0.00338894	1.92366e-25	linear	494153	NA	NA	2	0.169191	83.7829	6.16632	0.0130205	na	LDL,TC
HDL_cholesterol	Blood Biomarkers	rs5754217	22	21939675	T	-0.0108834	0.989176	0.00104422	1.95625e-25	linear	509923	NA	NA	2	0	0	0.368451	0.54385	na	logTG
Haematocrit_percentage	Blood Biomarkers	rs13107325	4	103188709	C	-0.128958	0.879011	0.0123779	2.04463e-25	linear	550975	NA	NA	2	0.231571	89.9529	9.95309	0.0016058	na	HDL,LDL,TC,logTG
LDL_cor	Blood Biomarkers	rs79279183	2	20370641	C	-0.0202263	0.979977	0.0019421	2.12663e-25	linear	491470	NA	NA	2	0.0452244	80.6171	5.15917	0.0231239	SDC1	LDL
TC_cor	Blood Biomarkers	rs55730499	6	161005610	C	-0.0692369	0.933106	0.0066496	2.18148e-25	linear	494273	NA	NA	2	1.188	95.595	22.7013	1.89238e-06	IGF2R	TC
Neutrophill_percentage	Blood Biomarkers	rs4761233	12	69722880	C	0.19464	1.21487	0.0186959	2.21286e-25	linear	514824	NA	NA	2	0.0203259	76.745	4.30015	0.0381089	na	logTG
Mean_corpuscular_haemoglobin	Blood Biomarkers	rs11089629	22	21958872	G	-0.0533228	0.948074	0.00512284	2.25969e-25	linear	550559	NA	NA	2	0	0	0.683188	0.408491	na	HDL
HDL_cholesterol	Blood Biomarkers	rs34931250	17	66879927	T	-0.0178396	0.982319	0.00171397	2.27129e-25	linear	509923	NA	NA	2	0.00230398	41.2612	1.70245	0.191968	na	HDL
Calcium	Blood Biomarkers	rs760077	1	155178782	A	0.00234911	1.00235	0.000225839	2.43499e-25	linear	376945	NA	NA	2	0.0323983	83.8075	6.17568	0.0129518	na	nonHDL
LDL_cor	Blood Biomarkers	rs2090034	2	20372409	A	-0.0201929	0.98001	0.001942	2.53308e-25	linear	492238	NA	NA	2	0.0420521	79.3605	4.84508	0.0277251	SDC1	HDL
HDL_cholesterol	Blood Biomarkers	rs11089629	22	21958872	G	-0.0108537	0.989205	0.00104393	2.55845e-25	linear	509689	NA	NA	2	0	0	0.309499	0.577988	na	HDL
LDL_cor	Blood Biomarkers	rs10096633	8	19830921	T	-0.0305541	0.969908	0.00293983	2.66465e-25	linear	494153	NA	NA	2	0.114424	83.0348	5.89441	0.015189	LPL	nonHDL
Type 2 diabetes	endocrine/metabolic	rs2947795	12	66206798	T	-0.0693248	0.933024	0.00667556	2.90575e-25	logistic	709390	136655	572735	2	0.000731487	86.7403	7.54165	0.00602889	HMGA2	logTG
Cholelithiasis	digestive	rs2290846	4	151199080	A	0.089948	1.09412	0.00867068	3.2622e-25	logistic	712628	33620	679008	2	0.00385005	96.1485	25.9642	3.47815e-07	na	HDL,TC
LDL_cor	Blood Biomarkers	rs140974562	2	203460202	T	-0.0224517	0.977798	0.00216489	3.36653e-25	linear	485280	NA	NA	2	0.179322	92.9088	14.1019	0.000173167	SUMO1	LDL
HDL_cholesterol	Blood Biomarkers	rs3800461	6	34616322	C	-0.0133646	0.986724	0.0012887	3.37241e-25	linear	509923	NA	NA	2	0	0	0.00384893	0.950531	na	LDL,TC,nonHDL
Coronary atherosclerosis	circulatory system	rs1412445	10	91002804	T	0.0544432	1.05595	0.00525027	3.40994e-25	logistic	711668	123256	588412	2	4.72596e-05	42.2875	1.73273	0.188063	LIPA	LDL
Type 2 diabetes	endocrine/metabolic	rs343087	12	66260924	G	-0.0704265	0.931996	0.00679408	3.54584e-25	logistic	712241	136863	575378	2	0.000619122	84.9317	6.63647	0.0099912	HMGA2	TC
Haematocrit_percentage	Blood Biomarkers	rs55707100	15	43820717	T	-0.215802	0.805895	0.0208208	3.5883e-25	linear	550975	NA	NA	2	0	0	0.00848529	0.926606	na	HDL
HDL_cholesterol	Blood Biomarkers	rs13173241	5	55861359	G	0.0105345	1.01059	0.00101691	3.79808e-25	linear	509638	NA	NA	2	0.0220325	95.3414	21.4655	3.60259e-06	na	LDL,TC,logTG,nonHDL
BMI	Physical Measures	rs12369179	12	122963550	T	-0.167731	0.845581	0.0161957	3.90867e-25	linear	561437	NA	NA	2	0	0	0.0171129	0.895921	na	HDL
Triglycerides	Blood Biomarkers	rs684773	3	135956305	A	-0.0277268	0.972654	0.00267849	4.11388e-25	linear	542544	NA	NA	2	0.00496491	78.4755	4.64587	0.0311284	STAG1	logTG
LDL_cor	Blood Biomarkers	rs9837622	3	32514647	A	-0.0385741	0.96216	0.00372666	4.14814e-25	linear	492246	NA	NA	2	0.320273	87.9922	8.32793	0.00390402	na	nonHDL
TC_cor	Blood Biomarkers	rs80215559	6	25918225	C	-0.0703918	0.932029	0.0068016	4.21576e-25	linear	494687	NA	NA	2	0.873939	93.2162	14.7409	0.000123341	na	LDL,TC,nonHDL
Essential hypertension	circulatory system	rs2409663	8	10643233	T	-0.0424243	0.958463	0.00410195	4.52751e-25	logistic	710493	340851	369642	2	0	0	0.809198	0.368358	na	LDL
Glucose	Blood Biomarkers	rs5400	3	170732300	G	0.0444826	1.04549	0.00430454	4.95208e-25	linear	362053	NA	NA	2	0	0	0.113705	0.735965	SLC2A2	logTG
Mean_platelet_thrombocyte_volume	Blood Biomarkers	rs964184	11	116648917	G	0.0368231	1.03751	0.00356441	5.11384e-25	linear	533561	NA	NA	2	0.0231636	63.3241	2.72659	0.09869	APOA1	HDL,LDL,TC,logTG,nonHDL
Mean_corpuscular_haemoglobin	Blood Biomarkers	rs5754217	22	21939675	T	-0.0528878	0.948486	0.00512457	5.69722e-25	linear	550815	NA	NA	2	0	0	0.565195	0.452174	na	logTG
Benign neoplasm of other parts of digestive system	neoplasms	rs6676150	1	155123837	C	-0.122134	0.885029	0.0118415	6.08387e-25	logistic	708050	16298	691752	2	0.00211324	87.6967	8.12787	0.00435898	na	TC
Essential hypertension	circulatory system	rs1801253	10	115805056	C	0.0475348	1.04868	0.00461012	6.28607e-25	logistic	706019	339666	366353	2	7.51736e-05	63.0427	2.70582	0.0999824	na	logTG
Red_blood_cell_erythrocyte_count	Blood Biomarkers	rs2248162	6	29915061	T	-0.00846101	0.991575	0.000821067	6.69654e-25	linear	550504	NA	NA	2	0	0	0.398874	0.527671	GABBR1	HDL
Red_blood_cell_erythrocyte_distribution_width	Blood Biomarkers	rs7908745	10	45953767	A	-0.0235929	0.976683	0.00228968	6.75608e-25	linear	533750	NA	NA	2	0	0	0.832631	0.361513	na	LDL
Albumin	Blood Biomarkers	rs10242866	7	17920613	T	0.0639251	1.06601	0.00620585	6.98952e-25	linear	504130	NA	NA	2	0.00398898	53.658	2.15787	0.141841	na	HDL,TC
Eosinophill_count	Blood Biomarkers	rs35045014	6	107432157	C	0.0031864	1.00319	0.000309487	7.36449e-25	linear	524036	NA	NA	2	0	0	0.000951987	0.975386	na	logTG
Mean_corpuscular_haemoglobin	Blood Biomarkers	rs4955411	3	49145304	A	0.0499266	1.05119	0.004851	7.65476e-25	linear	550815	NA	NA	2	0.0138601	58.9995	2.43899	0.118352	WDR6	logTG
Albumin	Blood Biomarkers	rs200489612	17	7106378	A	-0.531573	0.58768	0.0516716	8.02234e-25	linear	503011	NA	NA	2	0	0	0.719277	0.396381	TP53	logTG
Albumin	Blood Biomarkers	rs186021206	17	7069412	A	-0.478081	0.619972	0.0464884	8.3312e-25	linear	502383	NA	NA	2	0	0	0.397706	0.528276	TP53	LDL,TC,nonHDL
Mean_platelet_thrombocyte_volume	Blood Biomarkers	rs838133	19	49259529	G	0.0266013	1.02696	0.00258681	8.367e-25	linear	486673	NA	NA	2	0.0284695	77.6693	4.47814	0.034331	na	logTG
Cholelithiasis	digestive	rs2081687	8	59388565	C	-0.0850554	0.918461	0.00827815	9.16358e-25	logistic	712628	33620	679008	2	0.000244558	63.7274	2.7569	0.0968355	na	logTG
Mean_corpuscular_haemoglobin	Blood Biomarkers	rs59391722	22	21920817	C	-0.0529659	0.948412	0.00515984	1.01302e-24	linear	550534	NA	NA	2	0	0	0.339647	0.560033	na	TC
Direct_bilirubin	Blood Biomarkers	rs80215559	6	25918225	C	0.0387029	1.03946	0.003775	1.15396e-24	linear	424476	NA	NA	2	0	0	0.154901	0.693895	na	LDL,TC,nonHDL
Cholelithiasis	digestive	rs9297994	8	59392324	A	-0.0859676	0.917624	0.00838954	1.22076e-24	logistic	710048	33483	676565	2	6.79047e-05	32.0739	1.47219	0.225001	CYP7A1	LDL,TC,nonHDL
Other chronic nonalcoholic liver disease	digestive	rs429358	19	45411941	C	-0.149873	0.860817	0.0146403	1.35274e-24	logistic	712628	21875	690753	2	0.000410002	44.9896	1.81784	0.177571	APOE	HDL
LDL_cor	Blood Biomarkers	rs907866	2	20371380	A	-0.0200107	0.980188	0.00195506	1.37725e-24	linear	489923	NA	NA	2	0.0341618	75.2568	4.04152	0.0443939	SDC1	TC,nonHDL
HbA1c	Blood Biomarkers	rs3118362	6	28785085	C	-0.240008	0.786621	0.0234505	1.38677e-24	linear	504185	NA	NA	2	0.0177917	81.4339	5.38616	0.0202971	TRIM27	LDL,TC,nonHDL
Abnormal results of function study of liver	digestive	rs28601761	8	126500031	G	-0.0840854	0.919353	0.00822125	1.48836e-24	logistic	693871	35806	658065	2	0.0043512	95.4207	21.8374	2.96766e-06	na	LDL,TC,logTG,nonHDL
Direct_bilirubin	Blood Biomarkers	rs7916868	10	64988931	A	0.0207883	1.02101	0.00203336	1.55434e-24	linear	423588	NA	NA	2	0.00315959	71.3918	3.4955	0.0615358	JMJD1C	HDL
Direct_bilirubin	Blood Biomarkers	rs7924036	10	65191645	T	-0.0207611	0.979453	0.00203079	1.56226e-24	linear	424354	NA	NA	2	0.00435251	77.0733	4.36173	0.0367549	JMJD1C	logTG
Lymphocyte_percentage	Blood Biomarkers	rs17617028	4	106064683	G	-0.205992	0.81384	0.020159	1.64092e-24	linear	527984	NA	NA	2	0	0	0.692799	0.405214	TET2	LDL
Hyperplasia of prostate	genitourinary	rs1233393	6	29549653	G	-0.0882324	0.915548	0.00863659	1.67927e-24	logistic	712468	127203	585265	2	1.86812e-05	8.73438	1.0957	0.295211	na	logTG
Eosinophill_percentage	Blood Biomarkers	rs622871	6	31878495	A	-0.045634	0.955392	0.00447	1.80802e-24	linear	532710	NA	NA	2	0	0	0.0401618	0.841165	APOM	logTG
Monocyte_percentage	Blood Biomarkers	rs3812316	7	73020337	G	0.0902316	1.09443	0.00883922	1.82396e-24	linear	530613	NA	NA	2	0	0	0.00817153	0.927972	MLXIPL	logTG
Ventral hernia	digestive	rs2820441	1	219734960	C	0.131954	1.14106	0.0129319	1.90597e-24	logistic	712628	14194	698434	2	0	0	0.165615	0.684039	na	logTG
Aspartate_aminotransferase	Blood Biomarkers	rs10733608	9	117148430	G	0.232066	1.2612	0.0227461	1.9337e-24	linear	527763	NA	NA	2	0	0	0.535723	0.46421	na	HDL,TC
Creatinine	Blood Biomarkers	rs72992015	1	150842696	C	0.435064	1.54506	0.0426664	2.04727e-24	linear	541186	NA	NA	2	0.0318921	68.1827	3.14295	0.076256	ARNT	HDL
LDL_cor	Blood Biomarkers	rs1151996	3	12445807	C	-0.0203507	0.979855	0.00199584	2.05474e-24	linear	493116	NA	NA	2	0.0464551	80.3414	5.08684	0.0241081	PPARG	nonHDL
LDL_cor	Blood Biomarkers	rs113360274	6	29850784	A	-0.0251987	0.975116	0.00247209	2.12515e-24	linear	493712	NA	NA	2	0.0232647	56.4463	2.29602	0.129706	HLA-A	nonHDL
Hyperlipidemia	endocrine/metabolic	rs77303550	16	72079657	T	-0.0601525	0.941621	0.00590293	2.19114e-24	logistic	711008	280049	430959	2	0	0	0.114092	0.735532	AP1G1	LDL,TC
Primary thrombocytopenia	hematopoietic	rs77375493	9	5073770	T	2.2213	9.21928	0.218307	2.56119e-24	logistic	712119	2128	709991	2	0	0	0.00161976	0.967897	JAK2	HDL,TC
Atrial fibrillation	circulatory system	rs2252867	2	65296280	C	-0.0737013	0.928949	0.00724454	2.60773e-24	logistic	712439	52159	660280	2	0	0	0.15554	0.693297	SPRED2	logTG
Triglycerides	Blood Biomarkers	rs35062987	6	32590735	C	-0.0290875	0.971331	0.00285963	2.6501e-24	linear	542462	NA	NA	2	0.000283157	20.753	1.26188	0.261296	BRD2	TC
HDL_cholesterol	Blood Biomarkers	rs56271783	11	64004723	C	-0.0207207	0.979493	0.0020372	2.66738e-24	linear	507137	NA	NA	2	0.00267844	41.3252	1.70431	0.191725	MARK2	HDL,logTG
Haematocrit_percentage	Blood Biomarkers	rs1135908	19	808742	G	-0.0957785	0.908665	0.00941751	2.69213e-24	linear	550896	NA	NA	2	0	0	0.940884	0.332051	na	logTG
HDL_cholesterol	Blood Biomarkers	rs72997616	11	75474195	A	-0.0145335	0.985572	0.0014305	2.99765e-24	linear	507473	NA	NA	2	0	0	0.934861	0.333603	na	TC
Urea	Blood Biomarkers	rs1260326	2	27730940	C	-0.0315096	0.968982	0.00310172	3.02898e-24	linear	544352	NA	NA	2	0	0	0.748052	0.387094	na	HDL,LDL,TC,logTG,nonHDL
Triglycerides	Blood Biomarkers	rs75460349	1	27180088	C	0.0770133	1.08006	0.00758278	3.10499e-24	linear	541152	NA	NA	2	0	0	0.961643	0.326773	ARID1A	HDL
Abnormal results of function study of liver	digestive	rs1408579	10	101912194	C	0.0802586	1.08357	0.00790403	3.1761e-24	logistic	712540	36057	676483	2	0.0011201	85.2043	6.7587	0.00932915	SCD	HDL,logTG
Gout	endocrine/metabolic	rs10750766	11	65473798	C	-0.0912283	0.912809	0.00898465	3.18696e-24	logistic	710353	35871	674482	2	0	0	0.262256	0.608574	RELA	logTG
Haemoglobin_concentration	Blood Biomarkers	rs11066412	12	113218868	A	0.0255068	1.02583	0.00251317	3.33807e-24	linear	538245	NA	NA	2	0.0166909	59.4429	2.46566	0.116359	PTPN11	LDL,TC
Obesity	endocrine/metabolic	rs10938398	4	45186139	A	0.0476421	1.0488	0.00469423	3.34466e-24	logistic	711777	153620	558157	2	0	0	0.377501	0.538944	na	HDL
Albumin	Blood Biomarkers	rs6869704	5	122833667	C	-0.0617768	0.940093	0.00608778	3.39317e-24	linear	504534	NA	NA	2	0.00692871	68.0799	3.13282	0.076731	na	LDL,TC,nonHDL
TC_cor	Blood Biomarkers	rs681343	19	49206462	C	-0.0368859	0.963786	0.00363528	3.42984e-24	linear	494687	NA	NA	2	0.16341	91.8761	12.3093	0.000450707	na	LDL,nonHDL
LDL_cor	Blood Biomarkers	rs77960347	18	47109955	A	-0.0850174	0.918496	0.00838496	3.69827e-24	linear	494153	NA	NA	2	0.945633	82.8672	5.83677	0.0156946	LIPG	LDL,TC,nonHDL
Urea	Blood Biomarkers	rs6710091	2	239597	C	-0.0322085	0.968305	0.00317694	3.7385e-24	linear	543927	NA	NA	2	0.0273389	73.637	3.79319	0.0514615	na	HDL
Sicca syndrome	dermatologic	rs1264347	6	30798697	T	0.404244	1.49817	0.0398778	3.7824e-24	logistic	695156	2197	692959	2	0.0559819	94.6037	18.5314	1.67133e-05	na	logTG
Haematocrit_percentage	Blood Biomarkers	rs139974673	15	44027885	T	0.211536	1.23557	0.020874	3.9069e-24	linear	550622	NA	NA	2	0	0	0.0961408	0.756511	TP53BP1	logTG,nonHDL
Eosinophill_percentage	Blood Biomarkers	rs12943633	17	37970365	T	-0.0781797	0.924798	0.00771536	3.944e-24	linear	539365	NA	NA	2	0	0	0.544249	0.460677	na	LDL
Total_bilirubin	Blood Biomarkers	rs857725	1	158607935	T	0.110079	1.11637	0.0108708	4.23224e-24	linear	540620	NA	NA	2	0.00177105	35.2743	1.54498	0.213878	SPTA1	TC
Mean_corpuscular_haemoglobin	Blood Biomarkers	rs12048743	1	205114873	C	0.0413378	1.0422	0.00408633	4.68604e-24	linear	549873	NA	NA	2	0.0270354	79.0216	4.76681	0.0290136	na	nonHDL
HbA1c	Blood Biomarkers	rs6602909	13	114551993	T	-0.148576	0.861935	0.0146942	4.92793e-24	linear	502367	NA	NA	2	0.0107562	89.0495	9.13204	0.00251171	GAS6	LDL,TC,logTG,nonHDL
Mean_platelet_thrombocyte_volume	Blood Biomarkers	rs7772800	6	36477260	A	-0.0313645	0.969122	0.00310379	5.23832e-24	linear	532922	NA	NA	2	0	0	0.0254641	0.873216	na	HDL
Triglycerides	Blood Biomarkers	rs2409663	8	10643233	T	0.0232264	1.0235	0.0022995	5.48845e-24	linear	540507	NA	NA	2	0.000319376	30.4061	1.43691	0.230641	na	LDL
Gout	endocrine/metabolic	rs55747707	7	73037366	G	0.105541	1.11131	0.0104677	6.59439e-24	logistic	710622	35886	674736	2	0.000733521	64.4165	2.81029	0.0936614	MLXIPL	HDL
Triglycerides	Blood Biomarkers	rs7459547	8	11854888	G	-0.0229859	0.977276	0.00228029	6.75478e-24	linear	537820	NA	NA	2	0.00060896	45.805	1.84519	0.174344	na	HDL
Haematocrit_percentage	Blood Biomarkers	rs174564	11	61588305	A	-0.0685449	0.933752	0.00680458	7.24717e-24	linear	550237	NA	NA	2	0	0	0.726989	0.393861	na	HDL,LDL,TC,logTG,nonHDL
Direct_bilirubin	Blood Biomarkers	rs1661052	11	2942593	G	0.0351955	1.03582	0.00349667	7.85365e-24	linear	424476	NA	NA	2	0	0	0.000811492	0.977274	SLC22A18	TC
LDL_cor	Blood Biomarkers	rs6435149	2	203271267	T	-0.0222958	0.977951	0.00221744	8.75081e-24	linear	492933	NA	NA	2	0.130393	90.0443	10.0445	0.00152804	SUMO1	nonHDL
White_blood_cell_leukocyte_count	Blood Biomarkers	rs35282906	6	32657201	T	-0.0712822	0.931199	0.00709041	8.88142e-24	linear	540847	NA	NA	2	0	0	0.0089918	0.924454	BRD2	LDL
Mean_corpuscular_haemoglobin	Blood Biomarkers	rs3862948	1	205099959	A	-0.0483078	0.95284	0.00480903	9.64157e-24	linear	550220	NA	NA	2	0	0	0.689929	0.406189	na	HDL
Other chronic ischemic heart disease, unspecified	circulatory system	rs429358	19	45411941	C	0.0765472	1.07955	0.00762294	9.9954e-24	logistic	712628	88686	623942	2	0	0	0.499801	0.479587	APOE	HDL
Hypertension	circulatory system	rs3184504	12	111884608	T	0.051939	1.05331	0.00517458	1.04458e-23	logistic	712628	114535	598093	2	0	0	0.0966673	0.755866	ALDH2	HDL
Thrombocytopenia	hematopoietic	rs738408	22	44324730	T	0.122037	1.1298	0.012162	1.07752e-23	logistic	712434	20021	692413	2	0.00127773	69.5126	3.28004	0.0701271	na	HDL,TC,logTG
Other anemias	hematopoietic	rs80215559	6	25918225	C	-0.111357	0.89462	0.0110977	1.07849e-23	logistic	712628	88205	624423	2	0.000643998	69.5225	3.2811	0.0700818	na	LDL,TC,nonHDL
LDL_cor	Blood Biomarkers	rs9844432	3	58391293	G	-0.0352851	0.96533	0.00352125	1.23746e-23	linear	493651	NA	NA	2	0.28102	89.1575	9.22295	0.00239	na	LDL,TC,nonHDL
HDL_cholesterol	Blood Biomarkers	rs77136196	6	34247047	C	0.0200829	1.02029	0.00200433	1.24839e-23	linear	508281	NA	NA	2	0	0	0.523103	0.469521	HMGA1	logTG
Thrombocytopenia	hematopoietic	rs3747207	22	44324855	A	0.123094	1.13099	0.01229	1.29859e-23	logistic	711743	20013	691730	2	0.00164469	74.3428	3.89754	0.0483569	na	LDL,nonHDL
Mean_corpuscular_haemoglobin	Blood Biomarkers	rs11711179	3	142159885	A	-0.0596307	0.942112	0.00595703	1.37567e-23	linear	550692	NA	NA	2	0	0	0.229966	0.631549	na	LDL
HDL_cholesterol	Blood Biomarkers	rs5754102	22	21916272	A	-0.0108953	0.989164	0.00108859	1.39629e-23	linear	501316	NA	NA	2	0	0	0.701261	0.40236	na	LDL
Mean_corpuscular_volume	Blood Biomarkers	rs34054295	19	4478062	G	0.100404	1.10562	0.0100319	1.39854e-23	linear	548973	NA	NA	2	0	0	7.40205e-06	0.997829	na	LDL,TC,nonHDL
Eosinophill_percentage	Blood Biomarkers	rs1265097	6	31106459	C	0.0763688	1.07936	0.00763289	1.44545e-23	linear	541036	NA	NA	2	0	0	0.903978	0.341717	PRRC2A	LDL,nonHDL
Heart valve disorders	circulatory system	rs10455872	6	161010118	A	-0.234633	0.790861	0.0234525	1.45465e-23	logistic	712628	10736	701892	2	0	0	0.0196702	0.888462	PLG	LDL,nonHDL
BMI	Physical Measures	rs2510344	18	21113285	C	-0.0927333	0.911437	0.00926926	1.45791e-23	linear	563062	NA	NA	2	0	0	0.00278859	0.957886	NPC1	nonHDL
Hyperlipidemia	endocrine/metabolic	rs1169288	12	121416650	A	-0.0485052	0.952652	0.00485227	1.58046e-23	logistic	705719	279318	426401	2	1.7349e-05	26.7802	1.36575	0.242543	HNF1A	LDL,TC
Total_bilirubin	Blood Biomarkers	rs11635675	15	63793238	T	-0.101355	0.903612	0.0101426	1.63428e-23	linear	538760	NA	NA	2	0.000542468	16.0712	1.19149	0.27503	HERC1	logTG
Haematocrit_percentage	Blood Biomarkers	rs1264347	6	30798697	T	-0.0944357	0.909886	0.00945344	1.69338e-23	linear	533986	NA	NA	2	0.0691052	78.8702	4.73264	0.0295954	na	logTG
LDL_cor	Blood Biomarkers	rs3731696	2	203431804	A	-0.029581	0.970852	0.00296144	1.70797e-23	linear	494153	NA	NA	2	0.0115795	32.4091	1.47949	0.223854	na	logTG
Hypothyroidism NOS	endocrine/metabolic	rs11066412	12	113218868	A	0.06892	1.07135	0.00690946	1.96623e-23	logistic	699511	65302	634209	2	0.000633284	86.3032	7.30096	0.00689178	PTPN11	LDL,TC
HDL_cholesterol	Blood Biomarkers	rs28577594	12	123895906	G	0.0092452	1.00929	0.000926983	1.99231e-23	linear	508033	NA	NA	2	0.00288455	76.665	4.2854	0.038441	PITPNM2	logTG
Neutrophill_percentage	Blood Biomarkers	rs2586116	17	38505824	G	0.210914	1.23481	0.0211781	2.30269e-23	linear	516992	NA	NA	2	0.00747876	45.3096	1.82848	0.176308	na	HDL
Red_blood_cell_erythrocyte_count	Blood Biomarkers	rs2339718	12	111702646	G	-0.00910177	0.99094	0.000914049	2.33537e-23	linear	548335	NA	NA	2	0	0	0.0577799	0.81004	ATXN2	logTG
Mean_corpuscular_haemoglobin	Blood Biomarkers	rs77542162	17	67081278	A	-0.134086	0.874515	0.0134692	2.39836e-23	linear	550815	NA	NA	2	0	0	0.314758	0.574775	ABCA5	LDL,TC,logTG,nonHDL
Monocyte_percentage	Blood Biomarkers	rs4795393	17	37893484	C	-0.061707	0.940158	0.00620233	2.54746e-23	linear	524680	NA	NA	2	0.00119934	15.9741	1.19011	0.275308	MED1	TC
HDL_cholesterol	Blood Biomarkers	rs9844949	3	185820283	A	-0.011982	0.988089	0.00120516	2.72639e-23	linear	508493	NA	NA	2	0	0	0.24759	0.618777	na	TC
Neutrophill_count	Blood Biomarkers	rs3893464	6	29935250	G	0.0314432	1.03194	0.00316285	2.74939e-23	linear	520875	NA	NA	2	0	0	0.0512058	0.820978	na	LDL
HbA1c	Blood Biomarkers	rs4947249	6	31302029	G	0.142836	1.15354	0.0143682	2.75869e-23	linear	493202	NA	NA	2	0	0	0.0765025	0.782094	APOM	HDL
Neutrophill_count	Blood Biomarkers	rs1265097	6	31106459	C	-0.0581411	0.943517	0.00585062	2.85608e-23	linear	520893	NA	NA	2	0	0	0.568646	0.450798	PRRC2A	LDL,nonHDL
Mean_corpuscular_volume	Blood Biomarkers	rs10903129	1	25768937	A	0.097103	1.10197	0.00977263	2.89596e-23	linear	550793	NA	NA	2	0	0	0.820726	0.364968	LDLRAP1	LDL
Heart valve disorders	circulatory system	rs55730499	6	161005610	C	-0.232767	0.792338	0.0234397	3.06751e-23	logistic	712194	10725	701469	2	0	0	0.0115706	0.914339	IGF2R	TC
Haematocrit_percentage	Blood Biomarkers	rs17605615	4	87996745	G	0.0656846	1.06789	0.0066182	3.24634e-23	linear	550975	NA	NA	2	0	0	0.941861	0.3318	HSD17B11	TC
Type 2 diabetes with ophthalmic manifestations	endocrine/metabolic	rs7748382	6	20665549	G	-0.0939934	0.910289	0.00947095	3.26074e-23	logistic	712474	27899	684575	2	0	0	0.0131989	0.908535	na	logTG
Calcium	Blood Biomarkers	rs35613341	16	88535407	G	-0.00236818	0.997635	0.000238674	3.33207e-23	linear	367695	NA	NA	2	0	0	0.00168113	0.967295	ZFPM1	TC
HDL_cholesterol	Blood Biomarkers	rs1516725	3	185824004	T	-0.011955	0.988116	0.00120508	3.38908e-23	linear	508430	NA	NA	2	0	0	0.113742	0.735923	ETV5	HDL
Cancer of prostate	neoplasms	rs56193509	8	23525075	T	-0.0837375	0.919673	0.00844186	3.43076e-23	logistic	711881	45208	666673	2	0	0	0.473003	0.491609	na	logTG
Triglycerides	Blood Biomarkers	rs1716393	12	124560456	G	-0.0228958	0.977364	0.00230839	3.45733e-23	linear	541244	NA	NA	2	0	0	0.1221	0.726768	na	LDL
Total_bilirubin	Blood Biomarkers	rs34265667	8	41542093	A	0.260887	1.29808	0.0263113	3.56835e-23	linear	540620	NA	NA	2	0	0	0.685826	0.407588	ANK1	TC
Haematocrit_percentage	Blood Biomarkers	rs8113356	19	795816	G	-0.0934823	0.910754	0.00943137	3.6976e-23	linear	550975	NA	NA	2	0.000654316	3.6215	1.03758	0.308386	na	LDL,nonHDL
Hypercholesterolemia	endocrine/metabolic	rs12916	5	74656539	T	-0.0468671	0.954214	0.0047308	3.8889e-23	logistic	712628	116844	595784	2	0.000278046	86.0747	7.18115	0.00736735	HMGCR	LDL,TC,nonHDL
Monocyte_count	Blood Biomarkers	rs3128759	6	31885930	C	-0.00492573	0.995086	0.000497339	3.99224e-23	linear	511919	NA	NA	2	0	0	0.0767088	0.781808	APOM	LDL,TC,nonHDL
Coronary atherosclerosis	circulatory system	rs2980888	8	126507308	T	0.0533364	1.05478	0.00538704	4.12662e-23	logistic	712299	123296	589003	2	4.12347e-05	37.7574	1.60662	0.204968	TRIB1	HDL
Eosinophill_count	Blood Biomarkers	rs8073510	17	65839210	A	-0.00381585	0.996191	0.000385443	4.16625e-23	linear	530904	NA	NA	2	0.120903	94.5914	18.4891	1.70875e-05	BPTF	LDL,TC,nonHDL
LDL_cor	Blood Biomarkers	rs6869704	5	122833667	C	-0.0192177	0.980966	0.00194174	4.28298e-23	linear	493278	NA	NA	2	0.00171623	13.6068	1.1575	0.281985	na	LDL,TC,nonHDL
HbA1c	Blood Biomarkers	rs7776054	6	135418916	G	-0.154519	0.856828	0.0156197	4.48527e-23	linear	502908	NA	NA	2	0.00118999	45.0953	1.82134	0.177154	na	LDL,TC,nonHDL
HDL_cholesterol	Blood Biomarkers	rs11644601	16	15172118	T	-0.00893208	0.991108	0.000903242	4.65029e-23	linear	508416	NA	NA	2	0	0	0.0951021	0.757788	PDXDC1	HDL
TC_cor	Blood Biomarkers	rs11878908	19	49227443	C	-0.0360267	0.964615	0.00364483	4.86826e-23	linear	493913	NA	NA	2	0.196419	93.0613	14.4119	0.000146874	NUCB1	TC
Triglycerides	Blood Biomarkers	rs4820325	22	38599978	G	-0.0227242	0.977532	0.00229939	4.94797e-23	linear	541898	NA	NA	2	0.000638443	45.7141	1.8421	0.174705	DDX17	logTG
Mean_platelet_thrombocyte_volume	Blood Biomarkers	rs6894249	5	131797547	A	0.0245473	1.02485	0.0024844	5.05456e-23	linear	532866	NA	NA	2	0	0	0.243176	0.621921	IRF1	TC
Mean_corpuscular_volume	Blood Biomarkers	rs9438905	1	25764177	A	0.0967594	1.1016	0.00979322	5.0707e-23	linear	549032	NA	NA	2	0	0	0.674777	0.411391	LDLRAP1	nonHDL
Haemoglobin_concentration	Blood Biomarkers	rs1135908	19	808742	G	-0.0316471	0.968848	0.00320429	5.26558e-23	linear	550890	NA	NA	2	0.0168534	48.1824	1.92985	0.164775	na	logTG
Total_bilirubin	Blood Biomarkers	rs62011285	15	63791063	T	-0.100183	0.904672	0.0101464	5.4089e-23	linear	538551	NA	NA	2	0.000429727	13.1804	1.15181	0.28317	HERC1	TC,nonHDL
HDL_cholesterol	Blood Biomarkers	rs12928099	16	15150505	A	0.00892175	1.00896	0.00090447	5.95886e-23	linear	508846	NA	NA	2	0	0	0.103156	0.748074	PDXDC1	logTG
Mean_platelet_thrombocyte_volume	Blood Biomarkers	rs75763843	18	42062380	C	0.0355196	1.03616	0.00360158	6.06975e-23	linear	533455	NA	NA	2	0	0	0.00545017	0.941149	SETBP1	TC
HDL_cholesterol	Blood Biomarkers	rs577721086	6	127440047	T	0.0188636	1.01904	0.00191325	6.24123e-23	linear	507046	NA	NA	2	0.0020284	33.0207	1.493	0.221752	na	logTG
Diaphragmatic hernia	digestive	rs11031793	11	32470828	T	-0.0583011	0.943366	0.00591962	6.93725e-23	logistic	712376	67711	644665	2	0	0	0.428177	0.512885	na	HDL
Hyperlipidemia	endocrine/metabolic	rs10846744	12	125312425	G	-0.0623006	0.9396	0.00632652	7.02457e-23	logistic	712628	280273	432355	2	0	0	0.497493	0.480604	na	LDL,logTG,nonHDL
Essential hypertension	circulatory system	rs28394864	17	47450775	G	-0.0406531	0.960162	0.00412829	7.03016e-23	logistic	706424	339758	366666	2	0	0	0.870342	0.350861	ZNF652	logTG
Triglycerides	Blood Biomarkers	rs7964492	12	57823585	A	0.0259239	1.02626	0.00263332	7.23544e-23	linear	542287	NA	NA	2	0.00172003	63.2593	2.72178	0.0989878	na	HDL,logTG
Calcium	Blood Biomarkers	rs766448	2	61735446	T	-0.00219373	0.997809	0.000222846	7.26355e-23	linear	375313	NA	NA	2	0	0	0.026816	0.869923	XPO1	logTG
Haemoglobin_concentration	Blood Biomarkers	rs17605615	4	87996745	G	0.022167	1.02241	0.00225193	7.30576e-23	linear	550969	NA	NA	2	0	0	0.725274	0.394419	HSD17B11	TC
LDL_cor	Blood Biomarkers	rs35657082	6	27067657	T	-0.0346042	0.965988	0.00351621	7.4714e-23	linear	487055	NA	NA	2	0.166395	80.9691	5.25461	0.0218887	na	LDL,TC,nonHDL
LDL_cor	Blood Biomarkers	rs3184504	12	111884608	T	-0.0190318	0.981148	0.0019346	7.75588e-23	linear	494153	NA	NA	2	0.296941	96.6005	29.4159	5.83961e-08	ALDH2	HDL
Red_blood_cell_erythrocyte_distribution_width	Blood Biomarkers	rs2921064	8	8316637	T	0.0212502	1.02148	0.00216037	7.84987e-23	linear	525436	NA	NA	2	0	0	0.0605007	0.805706	na	logTG
Eosinophill_count	Blood Biomarkers	rs11171739	12	56470625	T	-0.00302916	0.996975	0.000308077	8.15938e-23	linear	531040	NA	NA	2	0.0282032	86.323	7.31156	0.00685123	na	HDL
Urea	Blood Biomarkers	rs28687959	4	77421345	C	-0.0300185	0.970428	0.00305301	8.16076e-23	linear	543132	NA	NA	2	0	0	0.287448	0.59186	na	logTG
Red_blood_cell_erythrocyte_count	Blood Biomarkers	rs1264347	6	30798697	T	-0.0112932	0.98877	0.00114947	8.81745e-23	linear	533697	NA	NA	2	0.0181393	52.8644	2.12154	0.14524	na	logTG
Obesity	endocrine/metabolic	rs1457489	18	57861961	G	-0.0514157	0.949884	0.00523389	8.90969e-23	logistic	710596	153558	557038	2	0.000195023	73.1315	3.72183	0.0537056	na	logTG
Neutrophill_count	Blood Biomarkers	rs35484700	4	55498781	C	-0.031132	0.969348	0.00317006	9.17747e-23	linear	517944	NA	NA	2	0	0	0.143389	0.704935	KIT	logTG
Triglycerides	Blood Biomarkers	rs72663972	4	87294293	A	0.0231214	1.02339	0.00235494	9.39717e-23	linear	539698	NA	NA	2	0	0	0.489777	0.484027	na	HDL,logTG
Hypothyroidism NOS	endocrine/metabolic	rs2844795	6	30073847	C	0.0584972	1.06024	0.00595911	9.56567e-23	logistic	712628	66030	646598	2	3.47322e-05	31.0983	1.45134	0.228312	na	TC
Mean_corpuscular_volume	Blood Biomarkers	rs11802413	1	25760920	C	0.096203	1.10098	0.00980135	9.67648e-23	linear	548521	NA	NA	2	0	0	0.56794	0.451079	LDLRAP1	TC
Triglycerides	Blood Biomarkers	rs12313762	12	57692470	T	-0.0258946	0.974438	0.00264003	1.03538e-22	linear	542200	NA	NA	2	0	0	0.0407174	0.840084	na	nonHDL
Albumin	Blood Biomarkers	rs75265117	2	165518799	C	0.0918101	1.09616	0.00936559	1.09379e-22	linear	504796	NA	NA	2	0.0042864	33.1366	1.49559	0.221352	COBLL1	HDL
BMI	Physical Measures	rs12446632	16	19935389	G	0.129496	1.13825	0.01321	1.09396e-22	linear	563513	NA	NA	2	0.00012874	20.8422	1.2633	0.261027	na	TC
LDL_cor	Blood Biomarkers	rs653178	12	112007756	C	-0.0189601	0.981219	0.00193454	1.11686e-22	linear	494153	NA	NA	2	0.292587	96.5536	29.0156	7.17989e-08	ALDH2	LDL,TC,nonHDL
Dementias	mental disorders	rs7412	19	45412079	T	-0.245493	0.782319	0.0250648	1.19104e-22	logistic	712628	13839	698789	2	0.0532242	96.5157	28.7	8.45043e-08	APOE	LDL,TC,nonHDL
Lymphocyte_percentage	Blood Biomarkers	rs66970053	14	103307655	C	0.198386	1.21943	0.0202576	1.20469e-22	linear	527529	NA	NA	2	0.0197719	68.3562	3.16018	0.0754548	na	HDL
TC_cor	Blood Biomarkers	rs77542162	17	67081278	A	-0.118364	0.888373	0.0120888	1.22878e-22	linear	494687	NA	NA	2	4.18863	95.7323	23.432	1.29406e-06	ABCA5	LDL,TC,logTG,nonHDL
Urea	Blood Biomarkers	rs62114538	2	256116	T	0.0308069	1.03129	0.00314644	1.23021e-22	linear	543160	NA	NA	2	0.0139787	61.0381	2.56661	0.109142	na	logTG
Hypertension	circulatory system	rs653178	12	112007756	C	0.050656	1.05196	0.00517484	1.25655e-22	logistic	712628	114535	598093	2	0	0	0.128354	0.720145	ALDH2	LDL,TC,nonHDL
TC_cor	Blood Biomarkers	rs3800461	6	34616322	C	-0.0555251	0.945988	0.00567576	1.33394e-22	linear	494687	NA	NA	2	0.755443	95.5605	22.5251	2.07412e-06	na	LDL,TC,nonHDL
HbA1c	Blood Biomarkers	rs5400	3	170732300	G	0.202348	1.22427	0.020697	1.41743e-22	linear	504185	NA	NA	2	0.000698527	22.5069	1.29044	0.255967	SLC2A2	logTG
LDL_cor	Blood Biomarkers	rs3118362	6	28785085	C	-0.0319926	0.968514	0.00327258	1.42819e-22	linear	494153	NA	NA	2	0.0743177	65.3691	2.88759	0.0892643	TRIM27	LDL,TC,nonHDL
Monocyte_percentage	Blood Biomarkers	rs55747707	7	73037366	G	-0.0721751	0.930368	0.00738385	1.44544e-22	linear	528674	NA	NA	2	0	0	0.0801718	0.777065	MLXIPL	HDL
Triglycerides	Blood Biomarkers	rs6689	6	32627700	A	-0.0284031	0.971997	0.00290623	1.46798e-22	linear	541451	NA	NA	2	0	0	0.61591	0.432571	BRD2	nonHDL
HDL_cholesterol	Blood Biomarkers	rs333947	1	110470764	A	-0.0112817	0.988782	0.00115442	1.4751e-22	linear	509923	NA	NA	2	0	0	0.613195	0.433587	GNAI3	HDL
Eosinophill_count	Blood Biomarkers	rs8071463	17	65938655	G	0.00376619	1.00377	0.00038538	1.47531e-22	linear	530429	NA	NA	2	0.144432	95.3812	21.6508	3.27079e-06	BPTF	HDL
Haematocrit_percentage	Blood Biomarkers	rs2800708	6	127437617	T	0.0636065	1.06567	0.00651029	1.51235e-22	linear	549416	NA	NA	2	0	0	0.00704884	0.93309	na	HDL
Monocyte_count	Blood Biomarkers	rs7530780	1	93130268	C	0.00492401	1.00494	0.000504277	1.599e-22	linear	511935	NA	NA	2	0	0	0.84687	0.357439	GFI1	TC
Haematocrit_percentage	Blood Biomarkers	rs77542162	17	67081278	A	-0.211092	0.8097	0.0216205	1.61487e-22	linear	550975	NA	NA	2	0	0	0.436897	0.508624	ABCA5	LDL,TC,logTG,nonHDL
Neutrophill_count	Blood Biomarkers	rs150361490	4	55530748	ATTATTTAT	0.0322512	1.03278	0.00330344	1.62397e-22	linear	489636	NA	NA	2	0	0	0.0637469	0.800669	na	HDL
BMI	Physical Measures	rs11641335	16	19967822	C	0.130168	1.13902	0.0133338	1.63463e-22	linear	560928	NA	NA	2	0	0	0.9809	0.321977	na	HDL
Haemoglobin_concentration	Blood Biomarkers	rs806794	6	26200677	A	0.0242943	1.02459	0.00248957	1.69769e-22	linear	550969	NA	NA	2	0.0265587	73.468	3.76903	0.0522099	HIST1H2BD	HDL
Direct_bilirubin	Blood Biomarkers	rs4410790	7	17284577	T	0.0205488	1.02076	0.00210655	1.7608e-22	linear	424476	NA	NA	2	0	0	0.582829	0.445206	na	nonHDL
Other chronic ischemic heart disease, unspecified	circulatory system	rs73015024	19	11197598	T	-0.0835615	0.919834	0.00856754	1.78623e-22	logistic	712293	88661	623632	2	0	0	0.342472	0.558406	LDLR	LDL,TC,nonHDL
Mean_corpuscular_haemoglobin	Blood Biomarkers	rs5754102	22	21916272	A	-0.0520432	0.949288	0.00533859	1.87218e-22	linear	541297	NA	NA	2	0	0	0.369455	0.543301	na	LDL
Hyperlipidemia	endocrine/metabolic	rs2244608	12	121416988	A	-0.0470615	0.954029	0.00482927	1.9368e-22	logistic	712628	280273	432355	2	3.2395e-06	6.46206	1.06908	0.301152	HNF1A	nonHDL
LDL_cor	Blood Biomarkers	rs6918059	6	116349041	T	-0.0190613	0.981119	0.00195653	1.98779e-22	linear	493636	NA	NA	2	0	0	0.222565	0.637093	na	nonHDL
Myocardial infarction	circulatory system	rs2297359	6	160492613	T	-0.254442	0.775349	0.0261286	2.07411e-22	logistic	712288	48719	663569	2	0.0141818	90.9634	11.0662	0.000879173	IGF2R	LDL
Myeloid leukemia, acute	neoplasms	rs77375493	9	5073770	T	2.7262	15.2747	0.280041	2.13829e-22	logistic	712119	1042	711077	2	0	0	0.00419807	0.948339	JAK2	HDL,TC
LDL_cor	Blood Biomarkers	rs13173241	5	55861359	G	-0.0232408	0.977027	0.00238743	2.14507e-22	linear	493842	NA	NA	2	0	0	0.280904	0.596109	na	LDL,TC,logTG,nonHDL
Calcium	Blood Biomarkers	rs7638903	3	12383714	A	-0.00329551	0.99671	0.000338577	2.17158e-22	linear	376429	NA	NA	2	0	0	0.281326	0.595834	PPARG	logTG
Triglycerides	Blood Biomarkers	rs73079476	12	21343833	A	-0.0309329	0.969541	0.00318096	2.37369e-22	linear	540621	NA	NA	2	0	0	0.0141852	0.905195	na	logTG
Cholelithiasis	digestive	rs556971810	2	44663206	A	0.400514	1.49259	0.0411882	2.38194e-22	logistic	709673	33436	676237	2	0.0253028	85.1439	6.73126	0.00947379	na	TC,nonHDL
Direct_bilirubin	Blood Biomarkers	rs6968554	7	17287106	G	-0.0204417	0.979766	0.00210262	2.42959e-22	linear	423826	NA	NA	2	0	0	0.576872	0.447541	AHR	HDL
Alanine_aminotransferase	Blood Biomarkers	rs114165349	1	27021913	G	-0.937822	0.39148	0.0964679	2.43935e-22	linear	542834	NA	NA	2	0.210831	83.4872	6.0559	0.0138599	NR0B2	LDL,TC,logTG,nonHDL
LDL_cor	Blood Biomarkers	rs2393792	12	121406293	A	-0.0188509	0.981326	0.00193983	2.53258e-22	linear	491963	NA	NA	2	0.015735	59.5727	2.47357	0.115774	MLEC	HDL
Abdominal hernia	digestive	rs11031793	11	32470828	T	-0.0615647	0.940292	0.00633651	2.58062e-22	logistic	712376	59486	652890	2	0	0	0.016597	0.897493	na	HDL
TC_cor	Blood Biomarkers	rs10903129	1	25768937	A	-0.0354279	0.965192	0.00364771	2.67078e-22	linear	494687	NA	NA	2	0.0723935	83.2536	5.97145	0.0145393	LDLRAP1	LDL
Red_blood_cell_erythrocyte_count	Blood Biomarkers	rs11076	16	30995528	G	0.00797856	1.00801	0.000821551	2.69115e-22	linear	546953	NA	NA	2	0.00830424	52.8759	2.12206	0.145191	na	TC
Albumin	Blood Biomarkers	rs67261871	3	156797941	T	-0.0603345	0.94145	0.00622018	3.02071e-22	linear	503848	NA	NA	2	0	0	0.105859	0.744909	na	HDL,logTG
Aspartate_aminotransferase	Blood Biomarkers	rs35062987	6	32590735	C	-0.272907	0.761163	0.0281377	3.04537e-22	linear	538713	NA	NA	2	0.0336565	88.5765	8.75387	0.00308946	BRD2	TC
Direct_bilirubin	Blood Biomarkers	rs2106727	7	17287998	A	0.0204001	1.02061	0.00210384	3.11649e-22	linear	423639	NA	NA	2	0	0	0.569932	0.450286	AHR	logTG
Alanine_aminotransferase	Blood Biomarkers	rs8178824	17	64224775	C	-0.810102	0.444813	0.0835482	3.12881e-22	linear	543192	NA	NA	2	0.280947	91.8127	12.2141	0.000474306	APOH	TC,nonHDL
Hypercholesterolemia	endocrine/metabolic	rs77303550	16	72079657	T	-0.0599552	0.941807	0.00618559	3.2378e-22	logistic	711008	116640	594368	2	0	0	0.200913	0.653985	AP1G1	LDL,TC
Mean_corpuscular_volume	Blood Biomarkers	rs77542162	17	67081278	A	-0.31374	0.730709	0.0324016	3.56572e-22	linear	550793	NA	NA	2	0.0005574	0.599997	1.00604	0.315854	ABCA5	LDL,TC,logTG,nonHDL
Eosinophill_count	Blood Biomarkers	rs13076933	3	12327431	G	-0.00341524	0.996591	0.000352731	3.58619e-22	linear	523503	NA	NA	2	0.00776942	55.7908	2.26197	0.132585	PPARG	LDL
Monocyte_count	Blood Biomarkers	rs2248162	6	29915061	T	-0.0048957	0.995116	0.000505767	3.67623e-22	linear	513285	NA	NA	2	0	0	0.436117	0.509003	GABBR1	HDL
HDL_cholesterol	Blood Biomarkers	rs635769	6	139831981	C	0.00824367	1.00828	0.000851802	3.74254e-22	linear	509723	NA	NA	2	0	0	0.981354	0.321865	na	LDL
Type 1 diabetes	endocrine/metabolic	rs56094641	16	53806453	G	0.0992984	1.1044	0.0102609	3.76371e-22	logistic	712424	20936	691488	2	0.00104199	74.0061	3.84705	0.0498334	na	HDL
Haematocrit_percentage	Blood Biomarkers	rs35742417	6	7247344	A	0.0806046	1.08394	0.00833456	3.99932e-22	linear	550975	NA	NA	2	0.0320894	70.6223	3.40395	0.0650407	na	logTG
LDL_cor	Blood Biomarkers	rs74341202	3	132183991	A	-0.0411091	0.959724	0.00425148	4.06941e-22	linear	492925	NA	NA	2	0.384575	87.6468	8.09506	0.00443861	na	LDL,TC
LDL_cor	Blood Biomarkers	rs56248798	6	30597083	C	-0.0484499	0.952705	0.00501083	4.0822e-22	linear	490813	NA	NA	2	0.0104052	12.9713	1.14905	0.283749	na	nonHDL
Red_blood_cell_erythrocyte_count	Blood Biomarkers	rs2800708	6	127437617	T	0.00765399	1.00768	0.000791641	4.10299e-22	linear	549127	NA	NA	2	0	0	0.496525	0.481031	na	HDL
Albumin	Blood Biomarkers	rs1938498	1	66098653	T	-0.0606278	0.941174	0.00627524	4.3972e-22	linear	505274	NA	NA	2	0	0	0.504766	0.477413	LEPR	HDL
HDL_cholesterol	Blood Biomarkers	rs12366872	12	123804721	G	-0.0137701	0.986324	0.00142587	4.57626e-22	linear	509916	NA	NA	2	0	0	0.216657	0.641599	na	HDL
TC_cor	Blood Biomarkers	rs538969346	18	46545976	G	-0.187037	0.829413	0.0193675	4.58111e-22	linear	491472	NA	NA	2	10.8246	96.6604	29.9441	4.44693e-08	na	HDL,LDL,TC,nonHDL
HDL_cholesterol	Blood Biomarkers	rs7312145	12	123825339	G	-0.0137658	0.986328	0.00142619	4.81183e-22	linear	509895	NA	NA	2	0	0	0.181931	0.669719	na	TC,nonHDL
Eosinophill_count	Blood Biomarkers	rs174564	11	61588305	A	0.00308848	1.00309	0.000320313	5.31031e-22	linear	530303	NA	NA	2	0.0112046	69.8028	3.31156	0.068794	na	HDL,LDL,TC,logTG,nonHDL
Eosinophill_count	Blood Biomarkers	rs11656743	17	65980289	A	-0.00366205	0.996345	0.000379898	5.44242e-22	linear	529449	NA	NA	2	0.0971774	93.6103	15.6502	7.62032e-05	BPTF	logTG
TC_cor	Blood Biomarkers	rs9438905	1	25764177	A	-0.0352291	0.965384	0.00365537	5.54591e-22	linear	492960	NA	NA	2	0.0746298	83.3608	6.0099	0.0142259	LDLRAP1	nonHDL
HDL_cholesterol	Blood Biomarkers	rs4239651	20	46340596	T	-0.00976475	0.990283	0.00101341	5.65933e-22	linear	509923	NA	NA	2	0	0	0.187979	0.664604	na	HDL
Haemoglobin_concentration	Blood Biomarkers	rs8113356	19	795816	G	-0.0309174	0.969556	0.00320905	5.72039e-22	linear	550969	NA	NA	2	0.0194744	51.8378	2.07632	0.149601	na	LDL,nonHDL
Other anemias	hematopoietic	rs11549407	11	5248004	A	1.47512	4.37157	0.153119	5.75565e-22	logistic	712247	88187	624060	2	0.284306	50.0272	2.00109	0.157186	na	TC
Other chronic ischemic heart disease, unspecified	circulatory system	rs11591147	1	55505647	T	-0.218387	0.803814	0.0226722	5.83576e-22	logistic	712628	88686	623942	2	0	0	0.0527299	0.818379	PCSK9	LDL,TC,nonHDL
TC_cor	Blood Biomarkers	rs11802413	1	25760920	C	-0.0352331	0.96538	0.00365833	5.9189e-22	linear	492465	NA	NA	2	0.0775833	83.8825	6.20442	0.0127432	LDLRAP1	TC
Neutrophill_percentage	Blood Biomarkers	rs62551047	9	91434086	A	0.37669	1.45745	0.0391371	6.27842e-22	linear	514533	NA	NA	2	0.0140594	34.4254	1.52498	0.216867	na	LDL
Albumin	Blood Biomarkers	rs12313762	12	57692470	T	-0.0679716	0.934287	0.007063	6.35582e-22	linear	505019	NA	NA	2	0	0	0.269044	0.603974	na	nonHDL
HDL_cholesterol	Blood Biomarkers	rs28461471	12	123856974	A	-0.0137378	0.986356	0.00142754	6.37104e-22	linear	509685	NA	NA	2	0	0	0.202143	0.652997	na	LDL
Pulmonary heart disease	circulatory system	rs149903077	11	46349696	T	0.702558	2.01891	0.0730127	6.43075e-22	logistic	710491	7294	703197	2	0.44411	95.9651	24.7841	6.41253e-07	F2	nonHDL
HDL_cholesterol	Blood Biomarkers	rs2982521	6	139835329	T	0.00819351	1.00823	0.000851697	6.5691e-22	linear	509868	NA	NA	2	0	0	0.756915	0.384296	na	TC,nonHDL
Triglycerides	Blood Biomarkers	rs7133378	12	124409502	A	-0.0234852	0.976788	0.00244157	6.65472e-22	linear	540156	NA	NA	2	0.00361492	81.0637	5.28087	0.021561	na	HDL,nonHDL
Neutrophill_percentage	Blood Biomarkers	rs876038	7	50308527	C	-0.192295	0.825063	0.0199951	6.76873e-22	linear	516651	NA	NA	2	0.00231065	25.6017	1.34412	0.246309	IKZF1	TC
HDL_cholesterol	Blood Biomarkers	rs73243877	4	26047616	A	0.0106084	1.01066	0.00110309	6.77944e-22	linear	509923	NA	NA	2	0.00108819	47.5046	1.90493	0.167528	na	HDL,logTG
HDL_cholesterol	Blood Biomarkers	rs17585887	6	139835498	T	-0.00804244	0.99199	0.000836286	6.78729e-22	linear	509889	NA	NA	2	0	0	0.268176	0.604558	CITED2	HDL,logTG
Hematuria	genitourinary	rs1321505	6	28052823	C	-0.0943532	0.909961	0.00981238	6.86163e-22	logistic	712623	52336	660287	2	0.00152517	88.489	8.68737	0.00320423	ZKSCAN4	HDL
Neutrophill_percentage	Blood Biomarkers	rs876039	7	50308811	G	-0.192266	0.825087	0.0199957	6.88384e-22	linear	516618	NA	NA	2	0.00232398	25.7116	1.34611	0.24596	na	HDL
Hypothyroidism NOS	endocrine/metabolic	rs10984811	9	100784050	A	-0.0645697	0.937471	0.00671682	7.03771e-22	logistic	710479	65908	644571	2	0	0	0.0109832	0.916534	na	HDL
Haematocrit_percentage	Blood Biomarkers	rs3775228	4	87985166	C	0.0640527	1.06615	0.00666466	7.19862e-22	linear	545273	NA	NA	2	0	0	0.575563	0.448057	HSD17B11	nonHDL
LDL_cor	Blood Biomarkers	rs13194714	6	116394819	A	-0.0188203	0.981356	0.00195939	7.60062e-22	linear	492668	NA	NA	2	0	0	0.204233	0.651325	na	LDL
Hyperplasia of prostate	genitourinary	rs2517601	6	30074072	C	-0.0794773	0.923599	0.00827929	8.03088e-22	logistic	707417	126980	580437	2	0	0	0.72103	0.395806	na	logTG
Neutrophill_percentage	Blood Biomarkers	rs9410381	9	91454519	T	0.373367	1.45262	0.0388955	8.0542e-22	linear	515632	NA	NA	2	0.0188283	41.1948	1.70053	0.192219	na	TC
Triglycerides	Blood Biomarkers	rs2899297	22	38594668	A	0.0222087	1.02246	0.00231405	8.20567e-22	linear	541592	NA	NA	2	0.000159047	17.2588	1.20859	0.271612	na	HDL
Chronic venous insufficiency [CVI]	circulatory system	rs56094641	16	53806453	G	0.0937954	1.09833	0.00977338	8.22891e-22	logistic	712424	24110	688314	2	0	0	0.75074	0.386242	na	HDL
Alanine_aminotransferase	Blood Biomarkers	rs3184504	12	111884608	T	0.271543	1.31199	0.0282962	8.27696e-22	linear	543580	NA	NA	2	0.00187663	38.9484	1.63796	0.200606	ALDH2	HDL
Urea	Blood Biomarkers	rs197923	17	45008742	G	-0.0304746	0.969985	0.00317832	8.95832e-22	linear	544299	NA	NA	2	0.0368144	80.782	5.20347	0.0225419	GOSR2	TC
Coronary atherosclerosis	circulatory system	rs3208305	8	19823648	A	0.0520845	1.05346	0.00543211	8.95942e-22	logistic	712117	123287	588830	2	5.28113e-05	42.5447	1.74048	0.187078	LPL	HDL
LDL_cor	Blood Biomarkers	rs113867238	2	203495058	A	-0.0203449	0.979861	0.00212193	8.98746e-22	linear	491572	NA	NA	2	0.189091	93.6323	15.7043	7.40551e-05	SUMO1	TC
Psoriasis vulgaris	dermatologic	rs2524143	6	31263510	T	-0.125633	0.881939	0.0131104	9.46006e-22	logistic	711244	16832	694412	2	0.0111127	95.4209	21.8385	2.96585e-06	APOM	TC
TC_cor	Blood Biomarkers	rs1883711	20	39179822	G	-0.103427	0.901742	0.0107948	9.59564e-22	linear	491448	NA	NA	2	2.53781	91.7107	12.0637	0.000514128	TOP1	LDL,TC,logTG,nonHDL
Triglycerides	Blood Biomarkers	rs687339	3	135932359	T	0.0259138	1.02625	0.00270496	9.69435e-22	linear	541265	NA	NA	2	0.0128184	92.3934	13.1464	0.000288068	STAG1	HDL,nonHDL
Type 2 diabetes	endocrine/metabolic	rs13173241	5	55861359	G	-0.055166	0.946328	0.00576003	9.95373e-22	logistic	712305	136867	575438	2	0	0	0.272561	0.601619	na	LDL,TC,logTG,nonHDL
Hypothyroidism NOS	endocrine/metabolic	rs2517601	6	30074072	C	0.0864608	1.09031	0.00902953	1.01526e-21	logistic	707417	65732	641685	2	0.000607339	78.3319	4.61508	0.031692	na	logTG
Neutrophill_count	Blood Biomarkers	rs11999532	9	139371405	C	0.0338078	1.03439	0.00353123	1.02888e-21	linear	520829	NA	NA	2	0.0181432	71.6579	3.52832	0.0603289	na	LDL
Red_blood_cell_erythrocyte_count	Blood Biomarkers	rs16942887	16	67928042	A	0.011813	1.01188	0.00123454	1.08195e-21	linear	550686	NA	NA	2	0	0	0.650525	0.419925	LCAT	logTG
Ankylosing spondylitis	musculoskeletal	rs2524143	6	31263510	T	-0.359394	0.698099	0.0375925	1.17465e-21	logistic	711244	2187	709057	2	0.00325544	49.2921	1.97208	0.160227	APOM	TC
HDL_cholesterol	Blood Biomarkers	rs7908745	10	45953767	A	-0.00845525	0.99158	0.000884704	1.21042e-21	linear	509923	NA	NA	2	0	0	0.258828	0.610926	na	LDL
Red_blood_cell_erythrocyte_count	Blood Biomarkers	rs55979739	16	31049155	A	0.00778656	1.00782	0.000815316	1.29251e-21	linear	550542	NA	NA	2	0.0096681	56.6921	2.30905	0.128623	HSD3B7	nonHDL
Triglycerides	Blood Biomarkers	rs838133	19	49259529	G	-0.0231652	0.977101	0.00242894	1.46779e-21	linear	496331	NA	NA	2	0.000503084	36.3555	1.57123	0.210029	na	logTG
White_blood_cell_leukocyte_count	Blood Biomarkers	rs881844	17	37810218	C	0.0466339	1.04774	0.00489122	1.51054e-21	linear	540210	NA	NA	2	0.0311563	79.3202	4.83563	0.0278775	na	HDL
LDL_cor	Blood Biomarkers	rs68028452	3	122285218	CT	-0.0201569	0.980045	0.00211444	1.52824e-21	linear	485605	NA	NA	2	0	0	0.190433	0.662556	na	LDL,TC,nonHDL
HbA1c	Blood Biomarkers	rs35742417	6	7247344	A	-0.168198	0.845187	0.0176443	1.53222e-21	linear	504185	NA	NA	2	0	0	0.65182	0.419463	na	logTG
Red_blood_cell_erythrocyte_distribution_width	Blood Biomarkers	rs3208305	8	19823648	A	-0.0225311	0.977721	0.00236377	1.54499e-21	linear	533251	NA	NA	2	0.0355878	81.6405	5.44676	0.0196046	LPL	HDL
HDL_cholesterol	Blood Biomarkers	rs12406245	1	93860625	A	-0.00812641	0.991907	0.000852567	1.54724e-21	linear	509453	NA	NA	2	0	0	0.37117	0.542367	TMED5	HDL
Cholelithiasis	digestive	rs681343	19	49206462	C	-0.0758303	0.926973	0.00795642	1.56223e-21	logistic	712628	33620	679008	2	0.000370005	74.2134	3.87798	0.0489233	na	LDL,nonHDL
Red_blood_cell_erythrocyte_count	Blood Biomarkers	rs3814883	16	29994922	T	-0.00756395	0.992465	0.000793647	1.56333e-21	linear	545250	NA	NA	2	0	0	0.0235144	0.878127	na	HDL
Red_blood_cell_erythrocyte_count	Blood Biomarkers	rs28601761	8	126500031	G	0.00779649	1.00783	0.00081819	1.58887e-21	linear	532483	NA	NA	2	0	0	0.0151746	0.901961	na	LDL,TC,logTG,nonHDL
Haemoglobin_concentration	Blood Biomarkers	rs2894801	6	52643065	A	0.0212858	1.02151	0.00223479	1.65445e-21	linear	547568	NA	NA	2	0	0	0.00298877	0.956402	GSTA1	nonHDL
Triglycerides	Blood Biomarkers	rs12303671	12	124492610	G	-0.022889	0.977371	0.00240352	1.6806e-21	linear	540393	NA	NA	2	0.000988258	54.1407	2.18058	0.139762	na	logTG
HDL_cholesterol	Blood Biomarkers	rs17875424	10	115798268	T	0.0117546	1.01182	0.00123491	1.75575e-21	linear	508258	NA	NA	2	0	0	0.0948947	0.758044	na	LDL
Urea	Blood Biomarkers	rs8065527	17	45024027	G	-0.0302883	0.970166	0.00318314	1.81326e-21	linear	543108	NA	NA	2	0.0430028	82.9288	5.85783	0.0155079	MYL4	HDL
Lymphoid leukemia, chronic	neoplasms	rs6708784	2	111927379	G	0.255623	1.29127	0.0268726	1.86293e-21	logistic	710718	2928	707790	2	0.00455744	72.484	3.63425	0.0566021	BCL2L11	logTG
Mean_platelet_thrombocyte_volume	Blood Biomarkers	rs806794	6	26200677	A	0.0259363	1.02628	0.00272692	1.88451e-21	linear	533561	NA	NA	2	0.00679882	46.3996	1.86566	0.171973	HIST1H2BD	HDL
TC_cor	Blood Biomarkers	rs2642438	1	220970028	A	-0.0377109	0.962991	0.00396536	1.90515e-21	linear	494687	NA	NA	2	0	0	0.675379	0.411182	HLX	HDL,LDL,TC,logTG,nonHDL
Mean_corpuscular_haemoglobin	Blood Biomarkers	rs11240358	1	205070573	G	0.0393494	1.04013	0.00413784	1.91275e-21	linear	550053	NA	NA	2	0.0443916	85.679	6.98275	0.00822992	na	logTG
Mean_corpuscular_volume	Blood Biomarkers	rs12794995	11	67372946	G	0.104004	1.1096	0.010938	1.93454e-21	linear	550659	NA	NA	2	0.00229367	19.7515	1.24613	0.264293	na	HDL
Chronic venous insufficiency [CVI]	circulatory system	rs62033400	16	53811788	A	-0.0929317	0.911256	0.00977552	1.97049e-21	logistic	712006	24109	687897	2	0	0	0.465551	0.495041	na	logTG
Haemoglobin_concentration	Blood Biomarkers	rs3775228	4	87985166	C	0.0215505	1.02178	0.00226789	2.05006e-21	linear	545267	NA	NA	2	0	0	0.395035	0.529665	HSD17B11	nonHDL
Red_blood_cell_erythrocyte_distribution_width	Blood Biomarkers	rs7459547	8	11854888	G	0.0203762	1.02059	0.0021468	2.27966e-21	linear	528946	NA	NA	2	0.0029634	30.5099	1.43905	0.230293	na	HDL
Albumin	Blood Biomarkers	rs577721086	6	127440047	T	-0.133632	0.874912	0.014082	2.31877e-21	linear	502453	NA	NA	2	0.0334498	63.9282	2.77225	0.0959111	na	logTG
Ankylosing spondylitis	musculoskeletal	rs35282906	6	32657201	T	-0.391002	0.676379	0.0412103	2.35573e-21	logistic	712598	2192	710406	2	0	0	0.00166885	0.967414	BRD2	LDL
Eosinophill_percentage	Blood Biomarkers	rs17625587	1	198990494	A	0.0447852	1.0458	0.00472199	2.4379e-21	linear	537331	NA	NA	2	0	0	0.582409	0.44537	PTPRC	nonHDL
Alanine_aminotransferase	Blood Biomarkers	rs75460349	1	27180088	C	0.899312	2.45791	0.0948222	2.44263e-21	linear	542186	NA	NA	2	0.189944	85.0759	6.70059	0.00963809	ARID1A	HDL
Neutrophill_percentage	Blood Biomarkers	rs9884482	4	106081636	C	-0.182172	0.833458	0.0192083	2.4471e-21	linear	516992	NA	NA	2	0.059281	90.7413	10.8006	0.00101467	na	HDL
Mean_corpuscular_volume	Blood Biomarkers	rs2291428	10	45958856	G	-0.107777	0.897828	0.0113678	2.52171e-21	linear	548404	NA	NA	2	0.00211652	18.3134	1.22419	0.26854	na	TC
Albumin	Blood Biomarkers	rs34042070	16	72101525	C	-0.0743548	0.928342	0.00784321	2.53907e-21	linear	501035	NA	NA	2	0.00016096	3.13295	1.03234	0.309609	HP	nonHDL
Haematocrit_percentage	Blood Biomarkers	rs9379828	6	26167951	G	-0.0636343	0.938348	0.00671325	2.56961e-21	linear	550750	NA	NA	2	0	0	0.926978	0.335649	HIST1H2BD	logTG
Alanine_aminotransferase	Blood Biomarkers	rs653178	12	112007756	C	0.267925	1.30725	0.0282937	2.8145e-21	linear	543580	NA	NA	2	0.00235618	44.4913	1.80152	0.179529	ALDH2	LDL,TC,nonHDL
Type 1 diabetes	endocrine/metabolic	rs62033400	16	53811788	A	-0.0972177	0.907358	0.0102689	2.87351e-21	logistic	712006	20930	691076	2	0.000865417	70.1322	3.34809	0.067283	na	logTG
Red_blood_cell_erythrocyte_distribution_width	Blood Biomarkers	rs7904973	10	124693587	G	0.0204186	1.02063	0.0021571	2.9145e-21	linear	533572	NA	NA	2	0.0523808	88.4164	8.63293	0.00330141	na	LDL,TC,nonHDL
LDL_cor	Blood Biomarkers	rs3822855	6	116316882	G	-0.0186766	0.981497	0.00197398	3.03936e-21	linear	493351	NA	NA	2	0	0	0.0276741	0.867877	na	TC
Hypothyroidism NOS	endocrine/metabolic	rs2071805	6	32441696	C	0.144623	1.1556	0.0152865	3.05529e-21	logistic	712624	66030	646594	2	0.0118587	95.4012	21.7449	3.11424e-06	BRD2	logTG
Triglycerides	Blood Biomarkers	rs114816312	4	110638824	T	0.122434	1.13024	0.0129443	3.12327e-21	linear	542544	NA	NA	2	0	0	0.0377497	0.845947	na	HDL,logTG,nonHDL
LDL_cor	Blood Biomarkers	rs41274050	10	52573772	C	-0.0912472	0.912792	0.00964768	3.14039e-21	linear	494153	NA	NA	2	0.841872	74.7996	3.96819	0.0463677	A1CF	LDL,TC,logTG,nonHDL
Alanine_aminotransferase	Blood Biomarkers	rs17605615	4	87996745	G	0.273982	1.31519	0.0289688	3.14377e-21	linear	543580	NA	NA	2	0.0373152	92.1041	12.6648	0.00037261	HSD17B11	TC
Neutrophill_percentage	Blood Biomarkers	rs1938498	1	66098653	T	0.181728	1.19929	0.0192162	3.16884e-21	linear	516926	NA	NA	2	0.0481336	88.5508	8.73426	0.00312286	LEPR	HDL
HDL_cholesterol	Blood Biomarkers	rs114816312	4	110638824	T	-0.04436	0.95661	0.00469369	3.35639e-21	linear	509923	NA	NA	2	0.00125666	4.03384	1.04203	0.307349	na	HDL,logTG,nonHDL
Nontoxic multinodular goiter	endocrine/metabolic	rs4804413	19	7222655	C	0.188648	1.20762	0.019961	3.36059e-21	logistic	712090	5639	706451	2	0.00103827	43.0609	1.75626	0.185091	INSR	logTG
Haemoglobin_concentration	Blood Biomarkers	rs1800961	20	43042364	T	0.0596937	1.06151	0.00631827	3.46064e-21	linear	550969	NA	NA	2	0	0	0.196182	0.65782	HNF4A	HDL,LDL,TC,nonHDL
Red_blood_cell_erythrocyte_distribution_width	Blood Biomarkers	rs6707559	2	219142773	T	0.0205157	1.02073	0.00217169	3.49026e-21	linear	533586	NA	NA	2	0	0	0.214196	0.643498	na	logTG
Nontoxic multinodular goiter	endocrine/metabolic	rs17689024	16	79739978	G	-0.191308	0.825878	0.0202617	3.66133e-21	logistic	709959	5632	704327	2	0	0	0.214214	0.643484	na	logTG
Haematocrit_percentage	Blood Biomarkers	rs1800961	20	43042364	T	0.175263	1.19156	0.0185685	3.77292e-21	linear	550975	NA	NA	2	0	0	0.00207043	0.963707	HNF4A	HDL,LDL,TC,nonHDL
HDL_cholesterol	Blood Biomarkers	rs4619163	11	56119093	C	0.0168059	1.01695	0.00178203	4.07246e-21	linear	498945	NA	NA	2	0	0	0.0594555	0.807359	na	logTG
Red_blood_cell_erythrocyte_distribution_width	Blood Biomarkers	rs10716631	2	219138170	G	0.0218667	1.02211	0.00231902	4.12977e-21	linear	474256	NA	NA	2	0	0	0.259962	0.610146	na	LDL
Mean_corpuscular_volume	Blood Biomarkers	rs1321505	6	28052823	C	-0.127202	0.880555	0.0134902	4.13136e-21	linear	550788	NA	NA	2	0.0380616	71.3317	3.48817	0.061809	ZKSCAN4	HDL
Alanine_aminotransferase	Blood Biomarkers	rs3775228	4	87985166	C	0.275347	1.31699	0.0292021	4.13939e-21	linear	537967	NA	NA	2	0.0351876	91.5285	11.8043	0.000590943	HSD17B11	nonHDL
Mean_corpuscular_haemoglobin	Blood Biomarkers	rs55979739	16	31049155	A	-0.0393828	0.961383	0.00417771	4.22437e-21	linear	550671	NA	NA	2	0.00160567	17.6447	1.21425	0.270492	HSD3B7	nonHDL
Mean_platelet_thrombocyte_volume	Blood Biomarkers	rs2302429	7	75614777	G	0.029466	1.0299	0.00312575	4.22591e-21	linear	533007	NA	NA	2	0	0	0.85459	0.355257	POR	LDL
Total_bilirubin	Blood Biomarkers	rs2022003	1	158586966	A	0.101191	1.10649	0.0107411	4.47009e-21	linear	539540	NA	NA	2	0.00302091	48.921	1.95775	0.161754	SPTA1	LDL,nonHDL
Mean_corpuscular_haemoglobin	Blood Biomarkers	rs4665299	2	26256840	C	-0.0473822	0.953723	0.00503421	4.86607e-21	linear	549643	NA	NA	2	0	0	0.00591442	0.938699	HADHA	TC
Eosinophill_percentage	Blood Biomarkers	rs1047891	2	211540507	A	0.0417373	1.04262	0.00443513	4.93224e-21	linear	541036	NA	NA	2	0	0	0.284952	0.593474	na	HDL
Neutrophill_percentage	Blood Biomarkers	rs59391722	22	21920817	C	0.223071	1.24991	0.0237128	5.09383e-21	linear	516711	NA	NA	2	0.0259135	72.6552	3.657	0.055834	na	TC
Mean_corpuscular_volume	Blood Biomarkers	rs11394256	10	45957247	C	-0.106938	0.898582	0.011368	5.10985e-21	linear	549607	NA	NA	2	0.00226683	19.4143	1.24091	0.265295	na	nonHDL
LDL_cor	Blood Biomarkers	rs1538385	6	116327493	A	-0.0185441	0.981627	0.00197199	5.26473e-21	linear	494042	NA	NA	2	0	0	0.0527719	0.818308	TSPYL1	HDL
Urea	Blood Biomarkers	rs1229984	4	100239319	T	0.0963071	1.1011	0.0102449	5.42866e-21	linear	544352	NA	NA	2	0.63984	91.9917	12.487	0.000409789	MTTP	nonHDL
Hypothyroidism NOS	endocrine/metabolic	rs2339718	12	111702646	G	-0.066456	0.935704	0.00707083	5.52899e-21	logistic	710216	65897	644319	2	8.73615e-05	44.7947	1.81142	0.178338	ATXN2	logTG
Eosinophill_percentage	Blood Biomarkers	rs10868080	9	86626769	T	0.0444748	1.04548	0.00473275	5.60093e-21	linear	540969	NA	NA	2	0	0	0.0638582	0.800499	na	logTG
Hyperplasia of prostate	genitourinary	rs1264347	6	30798697	T	-0.0757036	0.927091	0.008057	5.6673e-21	logistic	695156	126409	568747	2	0	0	0.0671989	0.79546	na	logTG
Mean_corpuscular_haemoglobin	Blood Biomarkers	rs12601110	17	27035335	G	0.067351	1.06967	0.00717195	5.94936e-21	linear	550806	NA	NA	2	0	0	0.025016	0.874327	TRAF4	TC
Creatinine	Blood Biomarkers	rs79760705	5	53298716	G	0.512435	1.66935	0.0545681	5.95856e-21	linear	543573	NA	NA	2	0.268049	91.9301	12.3917	0.000431235	na	TC,nonHDL
Psoriasis	dermatologic	rs3128759	6	31885930	C	-0.212619	0.808464	0.0226466	6.0815e-21	logistic	711035	4421	706614	2	0.0166239	86.0624	7.17482	0.0073934	APOM	LDL,TC,nonHDL
Polycythemia, secondary	hematopoietic	rs17476364	10	71094504	C	0.310019	1.36345	0.0330218	6.09545e-21	logistic	711698	4277	707421	2	0	0	0.0229696	0.879536	HK1	LDL,TC,nonHDL
Neutrophill_percentage	Blood Biomarkers	rs35502362	19	4966041	T	-0.183403	0.832432	0.0195354	6.09965e-21	linear	516681	NA	NA	2	0.00161052	20.2487	1.2539	0.262809	na	logTG
Albumin	Blood Biomarkers	rs7964492	12	57823585	A	0.0661506	1.06839	0.00704615	6.10434e-21	linear	505093	NA	NA	2	0.00131841	22.7674	1.29479	0.255167	na	HDL,logTG
Mean_corpuscular_volume	Blood Biomarkers	rs1047891	2	211540507	A	0.0980497	1.10302	0.0104455	6.18841e-21	linear	550793	NA	NA	2	0	0	0.0967467	0.755769	na	HDL
HDL_cholesterol	Blood Biomarkers	rs72823013	10	115786233	G	-0.0116568	0.988411	0.00124187	6.20575e-21	linear	508152	NA	NA	2	0	0	0.0191376	0.889973	na	HDL,nonHDL
HDL_cholesterol	Blood Biomarkers	rs7170463	15	41888918	A	-0.00837281	0.991662	0.000892172	6.30681e-21	linear	507691	NA	NA	2	0	0	0.504637	0.47747	na	HDL
Type 2 diabetes	endocrine/metabolic	rs58542926	19	19379549	T	0.0813508	1.08475	0.00867097	6.47505e-21	logistic	712628	136891	575737	2	0	0	0.450938	0.50189	na	LDL,TC,logTG,nonHDL
Ventral hernia	digestive	rs2820468	1	219673705	A	0.119239	1.12664	0.0127144	6.7091e-21	logistic	710900	14169	696731	2	0	0	0.169866	0.680231	na	nonHDL
Haematocrit_percentage	Blood Biomarkers	rs1529585	3	69870595	A	-0.0613856	0.940461	0.00654838	6.97305e-21	linear	550266	NA	NA	2	0	0	0.0639401	0.800374	na	logTG
TC_cor	Blood Biomarkers	rs56322906	19	11346155	A	-0.0938969	0.910377	0.0100174	7.02178e-21	linear	494229	NA	NA	2	2.7904	96.6703	30.0325	4.2487e-08	LDLR	HDL
Mean_corpuscular_haemoglobin	Blood Biomarkers	rs73238159	3	142078759	T	-0.0562784	0.945276	0.00600774	7.41608e-21	linear	550815	NA	NA	2	0	0	0.0557242	0.813386	na	TC,logTG
Albumin	Blood Biomarkers	rs2000999	16	72108093	G	-0.0724995	0.930066	0.00774124	7.57863e-21	linear	505330	NA	NA	2	0	0	0.904738	0.341515	na	logTG
Triglycerides	Blood Biomarkers	rs11636087	15	63788267	T	-0.0238638	0.976419	0.0025489	7.79734e-21	linear	526235	NA	NA	2	0	0	0.954411	0.328599	HERC1	LDL
Lymphocyte_percentage	Blood Biomarkers	rs4761233	12	69722880	C	-0.152644	0.858435	0.0163052	7.84532e-21	linear	526387	NA	NA	2	0	0	0.416871	0.518502	na	logTG
Haemoglobin_concentration	Blood Biomarkers	rs35742417	6	7247344	A	0.0265447	1.0269	0.00283593	7.96313e-21	linear	550969	NA	NA	2	0.0153381	52.511	2.10575	0.146746	na	logTG
Coronary atherosclerosis	circulatory system	rs3184504	12	111884608	T	0.0457105	1.04677	0.00488494	8.16957e-21	logistic	712628	123318	589310	2	0.000655309	91.9808	12.4701	0.00041352	ALDH2	HDL
Albumin	Blood Biomarkers	rs3768321	1	40035928	T	-0.0713634	0.931123	0.0076317	8.68929e-21	linear	504219	NA	NA	2	0.0070951	54.384	2.19221	0.13871	PABPC4	HDL,logTG
Red_blood_cell_erythrocyte_distribution_width	Blood Biomarkers	rs145013566	2	219162720	CA	0.0212958	1.02152	0.00227785	8.84223e-21	linear	486463	NA	NA	2	0	0	0.0756161	0.783329	CYP27A1	TC
Direct_bilirubin	Blood Biomarkers	rs440150	11	2936657	G	0.0327492	1.03329	0.00350548	9.4283e-21	linear	421433	NA	NA	2	0	0	0.0021247	0.963235	na	HDL
Calcium	Blood Biomarkers	rs77136196	6	34247047	C	-0.00502239	0.99499	0.000537612	9.45047e-21	linear	375301	NA	NA	2	0	0	0.887161	0.346248	HMGA1	logTG
Angina pectoris	circulatory system	rs2297359	6	160492613	T	-0.232672	0.792414	0.0249122	9.6637e-21	logistic	712288	53054	659234	2	0.0193017	93.9546	16.5415	4.75974e-05	IGF2R	LDL
LDL_cor	Blood Biomarkers	rs117199990	8	19820916	T	-0.0299086	0.970534	0.0032029	9.81936e-21	linear	493994	NA	NA	2	0.198228	87.2428	7.83873	0.00511385	LPL	logTG
Urea	Blood Biomarkers	rs6771713	3	136450593	C	0.0302559	1.03072	0.00324054	9.93953e-21	linear	543871	NA	NA	2	0	0	0.830756	0.362054	STAG1	TC
Neutrophill_count	Blood Biomarkers	rs2844795	6	30073847	C	-0.0295415	0.970891	0.00316554	1.03698e-20	linear	520893	NA	NA	2	0	0	0.513369	0.473684	na	TC
Haemoglobin_concentration	Blood Biomarkers	rs1292071	17	57926911	C	-0.0207002	0.979513	0.00221867	1.05854e-20	linear	549914	NA	NA	2	0.0223333	72.5488	3.64282	0.0563114	na	LDL,TC
Mean_corpuscular_haemoglobin_concentration	Blood Biomarkers	rs28601761	8	126500031	G	-0.0228367	0.977422	0.00244806	1.07381e-20	linear	530033	NA	NA	2	0	0	0.0255855	0.872917	na	LDL,TC,logTG,nonHDL
BMI	Physical Measures	rs12603276	17	34946547	C	-0.0879575	0.9158	0.00942959	1.08071e-20	linear	563259	NA	NA	2	0.000275222	49.5261	1.98122	0.159262	na	nonHDL
Red_blood_cell_erythrocyte_distribution_width	Blood Biomarkers	rs4846913	1	230294715	C	-0.0203566	0.979849	0.0021829	1.10488e-20	linear	533550	NA	NA	2	0.00304135	30.5706	1.44031	0.230089	GALNT2	HDL,logTG
Albumin	Blood Biomarkers	rs7599	19	36038390	G	-0.0586076	0.943077	0.00628519	1.11273e-20	linear	505330	NA	NA	2	0	0	0.306938	0.579565	na	LDL
Lymphocyte_percentage	Blood Biomarkers	rs55709272	2	113867288	C	-0.152836	0.858271	0.016391	1.11615e-20	linear	525228	NA	NA	2	0.00780095	55.9837	2.27189	0.131739	na	logTG
Mean_corpuscular_volume	Blood Biomarkers	rs3768321	1	40035928	T	-0.114172	0.892105	0.0122454	1.12408e-20	linear	549557	NA	NA	2	0	0	0.247229	0.619033	PABPC4	HDL,logTG
Mean_corpuscular_haemoglobin	Blood Biomarkers	rs111834982	3	142019751	G	-0.0560589	0.945483	0.00601425	1.15236e-20	linear	549743	NA	NA	2	0	0	0.00458134	0.946036	na	nonHDL
Neutrophill_percentage	Blood Biomarkers	rs4795393	17	37893484	C	0.181059	1.19849	0.0194294	1.17688e-20	linear	511059	NA	NA	2	0	0	0.882029	0.347646	MED1	TC
Calcium	Blood Biomarkers	rs34088055	16	88535670	T	-0.00225713	0.997745	0.000242309	1.21831e-20	linear	366290	NA	NA	2	0	0	0.644601	0.42205	ZFPM1	HDL
Mean_corpuscular_haemoglobin	Blood Biomarkers	rs11076	16	30995528	G	-0.0392069	0.961552	0.00421038	1.25483e-20	linear	547082	NA	NA	2	0.00143425	16.0361	1.19099	0.27513	na	TC
Mean_corpuscular_haemoglobin_concentration	Blood Biomarkers	rs35365035	19	17252151	T	0.02245	1.0227	0.00241169	1.29248e-20	linear	548236	NA	NA	2	0	0	0.0119514	0.912947	MYO9B	TC
Monocyte_count	Blood Biomarkers	rs7758845	6	135428537	C	-0.00508094	0.994932	0.000546007	1.33202e-20	linear	512188	NA	NA	2	0	0	0.194135	0.659497	na	HDL
Primary/intrinsic cardiomyopathies	circulatory system	rs730506	6	36645968	C	-0.126928	0.880797	0.0136405	1.33626e-20	logistic	711161	19297	691864	2	0.00193184	68.9775	3.22347	0.0725898	CDKN1A	logTG
LDL_cor	Blood Biomarkers	rs7261820	20	34160840	A	-0.0261323	0.974206	0.00280926	1.3754e-20	linear	493575	NA	NA	2	0.0750879	77.982	4.54174	0.033078	RBM39	LDL,TC
Haemoglobin_concentration	Blood Biomarkers	rs1292072	17	57925649	A	0.0250531	1.02537	0.00269336	1.38064e-20	linear	550268	NA	NA	2	0.00833478	39.6284	1.65641	0.198089	RPS6KB1	logTG
LDL_cor	Blood Biomarkers	rs10787429	10	113949664	C	-0.0202187	0.979984	0.00217375	1.3875e-20	linear	493006	NA	NA	2	0.128525	89.4371	9.46709	0.00209191	GPAM	nonHDL
LDL_cor	Blood Biomarkers	rs2792751	10	113940329	C	-0.0201576	0.980044	0.00216735	1.39655e-20	linear	494153	NA	NA	2	0.122689	90.6474	10.6922	0.00107588	na	LDL
Total_bilirubin	Blood Biomarkers	rs557933	1	234853268	A	-0.0900921	0.913847	0.00969334	1.48287e-20	linear	536645	NA	NA	2	0.00122413	29.9697	1.42795	0.232099	IRF2BP2	LDL,TC
Red_blood_cell_erythrocyte_count	Blood Biomarkers	rs881844	17	37810218	C	0.0077714	1.0078	0.000836279	1.50226e-20	linear	550019	NA	NA	2	0.0409298	84.0161	6.2563	0.0123753	na	HDL
Total_bilirubin	Blood Biomarkers	rs558971	1	234853406	A	-0.0900444	0.913891	0.00969481	1.57371e-20	linear	536547	NA	NA	2	0.00137419	32.4365	1.48009	0.22376	na	nonHDL
Glucose	Blood Biomarkers	rs76895963	12	4384844	G	-0.114195	0.892084	0.0122976	1.60211e-20	linear	351351	NA	NA	2	0	0	0.361275	0.547799	na	LDL,TC,logTG,nonHDL
Mean_platelet_thrombocyte_volume	Blood Biomarkers	rs7133378	12	124409502	A	0.0241892	1.02448	0.00260535	1.62579e-20	linear	531119	NA	NA	2	0	0	0.0284655	0.866019	na	HDL,nonHDL
HbA1c	Blood Biomarkers	rs7758845	6	135428537	C	-0.143052	0.866709	0.0154138	1.68297e-20	linear	502926	NA	NA	2	0.000629893	30.3872	1.43652	0.230704	na	HDL
Mean_corpuscular_haemoglobin_concentration	Blood Biomarkers	rs806794	6	26200677	A	0.024641	1.02495	0.00265712	1.79964e-20	linear	548236	NA	NA	2	0.00519899	39.7839	1.66068	0.197511	HIST1H2BD	HDL
LDL_cor	Blood Biomarkers	rs7776054	6	135418916	G	-0.0204238	0.979783	0.00220331	1.86859e-20	linear	492886	NA	NA	2	0.180847	92.9182	14.1207	0.000171446	na	LDL,TC,nonHDL
Aspartate_aminotransferase	Blood Biomarkers	rs115383270	1	161531340	G	-0.41603	0.65966	0.0448827	1.87392e-20	linear	530558	NA	NA	2	0.00815054	38.7156	1.63174	0.201463	na	LDL,TC
Total_bilirubin	Blood Biomarkers	rs553427	1	234852760	C	-0.0894017	0.914478	0.00964935	1.94992e-20	linear	540091	NA	NA	2	0.00214149	42.6284	1.74302	0.186756	na	HDL
Aspartate_aminotransferase	Blood Biomarkers	rs6689	6	32627700	A	-0.268219	0.76474	0.028954	1.97603e-20	linear	537706	NA	NA	2	0.0399156	87.416	7.94658	0.00481785	BRD2	nonHDL
Haematocrit_percentage	Blood Biomarkers	rs11066412	12	113218868	A	0.0684237	1.07082	0.00738768	2.00893e-20	linear	538252	NA	NA	2	0.013082	54.4183	2.19386	0.138562	PTPN11	LDL,TC
Alanine_aminotransferase	Blood Biomarkers	rs1801689	17	64210580	A	-0.766628	0.464577	0.0827939	2.05425e-20	linear	543580	NA	NA	2	0.586437	96.0389	25.2458	5.04688e-07	APOH	LDL,logTG
HDL_cholesterol	Blood Biomarkers	rs2167750	4	89730074	T	-0.00765444	0.992375	0.000826744	2.07257e-20	linear	508887	NA	NA	2	0	0	0.422782	0.515552	na	HDL
Abnormal results of function study of liver	digestive	rs17668357	10	102003906	G	0.077817	1.08092	0.00840561	2.08772e-20	logistic	712071	36051	676020	2	0.00113901	84.8359	6.59451	0.0102294	na	TC,nonHDL
Mean_corpuscular_volume	Blood Biomarkers	rs11239551	10	46026107	G	-0.105589	0.899795	0.0114083	2.1328e-20	linear	547623	NA	NA	2	0.00254561	21.1964	1.26898	0.259958	na	HDL
Haemoglobin_concentration	Blood Biomarkers	rs1292066	17	57932314	A	-0.0248901	0.975417	0.00268972	2.16683e-20	linear	550556	NA	NA	2	0.0127428	50.3083	2.01241	0.156017	RPS6KB1	HDL
Neutrophill_percentage	Blood Biomarkers	rs5754102	22	21916272	A	0.227163	1.25503	0.0245525	2.2e-20	linear	507494	NA	NA	2	0.0197575	65.0195	2.85874	0.0908789	na	LDL
Neutrophill_count	Blood Biomarkers	rs2980888	8	126507308	T	-0.0319589	0.968546	0.00345452	2.21719e-20	linear	520570	NA	NA	2	0.0074936	51.4457	2.05955	0.151255	TRIB1	HDL
Mean_platelet_thrombocyte_volume	Blood Biomarkers	rs17605615	4	87996745	G	0.0228183	1.02308	0.00246664	2.2285e-20	linear	533561	NA	NA	2	0.0193717	73.1552	3.72511	0.0536001	HSD17B11	TC
White_blood_cell_leukocyte_count	Blood Biomarkers	rs4449583	5	1284135	T	0.0458209	1.04689	0.0049534	2.237e-20	linear	533971	NA	NA	2	0	0	0.773809	0.379041	na	HDL
Haematocrit_percentage	Blood Biomarkers	rs28687959	4	77421345	C	-0.0604512	0.94134	0.00653604	2.26789e-20	linear	549726	NA	NA	2	0	0	0.7874	0.374888	na	logTG
Hypothyroidism NOS	endocrine/metabolic	rs1233393	6	29549653	G	0.0864906	1.09034	0.00935191	2.27795e-20	logistic	712468	66019	646449	2	0.000209874	53.9945	2.17365	0.140392	na	logTG
LDL_cor	Blood Biomarkers	rs12481365	20	34131396	T	-0.0259412	0.974392	0.00280503	2.28572e-20	linear	494093	NA	NA	2	0.0683257	76.5151	4.25805	0.0390648	RBM39	logTG
Mean_platelet_thrombocyte_volume	Blood Biomarkers	rs9425300	1	172361977	T	0.0225948	1.02285	0.00244396	2.3489e-20	linear	532346	NA	NA	2	0.00252709	26.4843	1.36025	0.243494	na	HDL,logTG
LDL_cor	Blood Biomarkers	rs1134030	8	145051484	C	-0.0187407	0.981434	0.00202745	2.38602e-20	linear	484364	NA	NA	2	0.0370808	76.1984	4.20139	0.0403908	na	LDL,nonHDL
Total_bilirubin	Blood Biomarkers	rs508293	1	234848712	G	-0.0894508	0.914433	0.00967792	2.40203e-20	linear	539035	NA	NA	2	0.00315839	47.9811	1.92238	0.165595	na	logTG
Lymphocyte_percentage	Blood Biomarkers	rs864745	7	28180556	C	0.149549	1.16131	0.0161829	2.43863e-20	linear	528555	NA	NA	2	0.0191154	76.7344	4.29819	0.038153	na	logTG
Mean_platelet_thrombocyte_volume	Blood Biomarkers	rs12404665	1	172357433	C	-0.0225604	0.977692	0.00244192	2.49305e-20	linear	532959	NA	NA	2	0	0	0.545418	0.460196	na	nonHDL
LDL_cor	Blood Biomarkers	rs11781667	8	145040856	G	-0.0186763	0.981497	0.00202173	2.51592e-20	linear	490382	NA	NA	2	0.0451602	79.4148	4.85787	0.0275203	na	TC
Red_blood_cell_erythrocyte_count	Blood Biomarkers	rs140820592	16	31021880	G	0.00770004	1.00773	0.000833697	2.55859e-20	linear	533741	NA	NA	2	0.0141131	65.7319	2.91816	0.0875875	na	LDL
Creatinine	Blood Biomarkers	rs28601761	8	126500031	G	0.325565	1.38481	0.0352519	2.57359e-20	linear	526932	NA	NA	2	0.0890327	90.2854	10.2938	0.00133481	na	LDL,TC,logTG,nonHDL
LDL_cor	Blood Biomarkers	rs45563939	20	34136791	T	-0.0259237	0.974409	0.00280704	2.57718e-20	linear	493932	NA	NA	2	0.0654241	75.7501	4.12372	0.0422859	TRPC4AP	nonHDL
Hypothyroidism NOS	endocrine/metabolic	rs2921064	8	8316637	T	-0.0570212	0.944574	0.00617764	2.70008e-20	logistic	704059	65544	638515	2	0	0	0.210284	0.646545	na	logTG
Triglycerides	Blood Biomarkers	rs2749013	6	52627165	A	0.0218836	1.02212	0.00237163	2.77637e-20	linear	541652	NA	NA	2	0	0	0.0168794	0.896629	GSTA1	HDL
HDL_cholesterol	Blood Biomarkers	rs10233430	7	1051664	C	-0.0076835	0.992346	0.000832708	2.7801e-20	linear	509742	NA	NA	2	0.000766528	51.64	2.06783	0.150436	na	HDL
Lymphocyte_percentage	Blood Biomarkers	rs35282906	6	32657201	T	-0.2297	0.794772	0.0249009	2.84713e-20	linear	528525	NA	NA	2	0	0	0.936517	0.333175	BRD2	LDL
HDL_cholesterol	Blood Biomarkers	rs141783576	6	127439897	G	0.0153072	1.01542	0.00165943	2.85252e-20	linear	502394	NA	NA	2	0.00344322	49.5674	1.98285	0.159091	na	nonHDL
HDL_cholesterol	Blood Biomarkers	rs10012528	4	89724963	C	0.00762414	1.00765	0.000826781	2.93049e-20	linear	508971	NA	NA	2	0	0	0.493496	0.482372	FAM13A	logTG
Mean_platelet_thrombocyte_volume	Blood Biomarkers	rs3775228	4	87985166	C	0.022899	1.02316	0.00248371	2.98021e-20	linear	527859	NA	NA	2	0.0163076	69.2494	3.25197	0.0713376	HSD17B11	nonHDL
Coronary atherosclerosis	circulatory system	rs653178	12	112007756	C	0.0450219	1.04605	0.00488433	3.0379e-20	logistic	712628	123318	589310	2	0.000670231	92.1442	12.7294	0.000359958	ALDH2	LDL,TC,nonHDL
Triglycerides	Blood Biomarkers	rs6458869	6	52630269	A	-0.0218466	0.97839	0.00237053	3.08654e-20	linear	541428	NA	NA	2	0	0	0.0119604	0.912914	na	logTG
Albumin	Blood Biomarkers	rs28601761	8	126500031	G	-0.0578412	0.9438	0.00627965	3.23455e-20	linear	489018	NA	NA	2	0.000892377	20.6547	1.26031	0.261591	na	LDL,TC,logTG,nonHDL
Coronary atherosclerosis	circulatory system	rs117199990	8	19820916	T	-0.0754584	0.927318	0.00819498	3.32645e-20	logistic	712463	123309	589154	2	5.85398e-05	26.3384	1.35756	0.243961	LPL	logTG
Obesity	endocrine/metabolic	rs2613496	1	72754788	C	0.0570514	1.05871	0.006204	3.7181e-20	logistic	712549	153671	558878	2	6.59548e-06	6.35664	1.06788	0.301424	na	HDL
Red_blood_cell_erythrocyte_distribution_width	Blood Biomarkers	rs3768321	1	40035928	T	0.0246616	1.02497	0.00268366	3.94605e-20	linear	532514	NA	NA	2	0.026326	67.8599	3.11138	0.0777471	PABPC4	HDL,logTG
Other chronic nonalcoholic liver disease	digestive	rs483082	19	45416178	G	0.112283	1.11883	0.0122208	4.00551e-20	logistic	710112	21846	688266	2	0	0	0.126691	0.721888	APOE	logTG
Eosinophill_percentage	Blood Biomarkers	rs1434282	1	199010721	C	0.0427636	1.04369	0.0046559	4.12239e-20	linear	536003	NA	NA	2	0	0	0.806563	0.369138	PTPRC	LDL,TC
BMI	Physical Measures	rs3800461	6	34616322	C	0.132562	1.14175	0.0144349	4.17546e-20	linear	563664	NA	NA	2	0	0	0.119148	0.72996	na	LDL,TC,nonHDL
Haematocrit_percentage	Blood Biomarkers	rs738408	22	44324730	T	0.0722469	1.07492	0.0078707	4.34198e-20	linear	550789	NA	NA	2	0	0	0.26474	0.606882	na	HDL,TC,logTG
Other chronic ischemic heart disease, unspecified	circulatory system	rs10846744	12	125312425	G	-0.0687262	0.933582	0.00748983	4.47671e-20	logistic	712628	88686	623942	2	0	0	0.353662	0.552047	na	LDL,logTG,nonHDL
Neutrophill_percentage	Blood Biomarkers	rs140490	22	21921686	T	0.216095	1.24122	0.0235513	4.49471e-20	linear	516719	NA	NA	2	0.021207	69.7031	3.30067	0.0692517	YDJC	nonHDL
Calcium	Blood Biomarkers	rs148889882	6	34141700	A	0.00524396	1.00526	0.000571544	4.51209e-20	linear	376645	NA	NA	2	0	0	0.438967	0.507621	na	HDL
Neutrophill_percentage	Blood Biomarkers	rs12943633	17	37970365	T	0.31839	1.37491	0.0347126	4.63557e-20	linear	515321	NA	NA	2	0.081369	79.9788	4.9947	0.0254251	na	LDL
HDL_cholesterol	Blood Biomarkers	rs77403571	11	45913607	G	-0.0159995	0.984128	0.00174499	4.78219e-20	linear	504184	NA	NA	2	0.000901707	20.0691	1.25108	0.263346	na	HDL
Lymphocyte_percentage	Blood Biomarkers	rs13398728	2	113842506	C	-0.152159	0.858852	0.0166021	4.95381e-20	linear	528195	NA	NA	2	0.0192419	75.5242	4.08567	0.0432482	na	nonHDL
LDL_cor	Blood Biomarkers	rs2803619	10	113934384	G	0.0198576	1.02006	0.00216691	5.00024e-20	linear	493998	NA	NA	2	0.150893	91.9719	12.4562	0.000416599	na	HDL,TC,logTG
Hypercholesterolemia	endocrine/metabolic	rs34042070	16	72101525	C	-0.0538395	0.947584	0.0058775	5.17667e-20	logistic	707727	116198	591529	2	0.000124011	64.0189	2.77924	0.0954937	HP	nonHDL
Red_blood_cell_erythrocyte_count	Blood Biomarkers	rs7908745	10	45953767	A	0.00776187	1.00779	0.00084745	5.23364e-20	linear	550686	NA	NA	2	0	0	0.458033	0.498545	na	LDL
Triglycerides	Blood Biomarkers	rs17052061	3	52346240	G	-0.0269491	0.973411	0.00294253	5.2636e-20	linear	541847	NA	NA	2	0	0	0.0509226	0.821466	GLYCTK	logTG
Splenomegaly	digestive	rs738408	22	44324730	T	0.222009	1.24858	0.0242504	5.44249e-20	logistic	712434	4561	707873	2	0	0	0.850265	0.356477	na	HDL,TC,logTG
HDL_cholesterol	Blood Biomarkers	rs571298027	16	68866671	G	-0.177997	0.836945	0.0194447	5.48607e-20	linear	509884	NA	NA	2	0	0	0.22932	0.632029	na	HDL
BMI	Physical Measures	rs10460509	2	58772377	T	0.0860868	1.0899	0.00940516	5.53036e-20	linear	560242	NA	NA	2	0	0	0.170245	0.679895	na	HDL
LDL_cor	Blood Biomarkers	rs10832954	11	18643559	G	-0.0202479	0.979956	0.00221238	5.58465e-20	linear	493850	NA	NA	2	0.0312696	69.3441	3.26201	0.0709021	TSG101	TC,nonHDL
Haemoglobin_concentration	Blood Biomarkers	rs2219143	9	2622278	A	0.0219197	1.02216	0.00239638	5.85379e-20	linear	508076	NA	NA	2	0	0	0.0470457	0.828286	na	logTG
Aspartate_aminotransferase	Blood Biomarkers	rs1771582	1	161614490	T	-0.219605	0.802836	0.0240142	5.97579e-20	linear	482339	NA	NA	2	0.0289593	90.9463	11.0453	0.000889142	na	HDL
Monocyte_count	Blood Biomarkers	rs9379828	6	26167951	G	-0.00459518	0.995415	0.000502513	5.99594e-20	linear	513241	NA	NA	2	0	0	0.32193	0.57045	HIST1H2BD	logTG
Mean_corpuscular_volume	Blood Biomarkers	rs72812818	5	173356752	C	0.0969278	1.10178	0.0106022	6.11958e-20	linear	549239	NA	NA	2	0	0	0.991479	0.319381	CPEB4	HDL,logTG
LDL_cor	Blood Biomarkers	rs12942428	17	46529501	C	-0.0191485	0.981034	0.00209455	6.12769e-20	linear	493732	NA	NA	2	0.0400118	75.9928	4.16542	0.0412572	NFE2L1	TC
HDL_cholesterol	Blood Biomarkers	rs687339	3	135932359	T	-0.00898802	0.991052	0.000983212	6.15995e-20	linear	508745	NA	NA	2	0.00818236	88.8323	8.95439	0.00276803	STAG1	HDL,nonHDL
Haematocrit_percentage	Blood Biomarkers	rs1292071	17	57926911	C	-0.0596028	0.942139	0.00652041	6.18934e-20	linear	549920	NA	NA	2	0.0352689	81.262	5.33676	0.0208802	na	LDL,TC
HDL_cholesterol	Blood Biomarkers	rs9296406	6	42940810	T	-0.00756122	0.992467	0.000827207	6.20711e-20	linear	509110	NA	NA	2	0	0	0.198101	0.656258	na	HDL
Mean_corpuscular_haemoglobin	Blood Biomarkers	rs140820592	16	31021880	G	-0.0389704	0.961779	0.00426385	6.26146e-20	linear	533870	NA	NA	2	0.00439447	37.0516	1.5886	0.207526	na	LDL
BMI	Physical Measures	rs12916	5	74656539	T	0.0858978	1.08969	0.00940186	6.46535e-20	linear	563664	NA	NA	2	0.000446486	64.3259	2.80316	0.094079	HMGCR	LDL,TC,nonHDL
HDL_cholesterol	Blood Biomarkers	rs12133907	1	93850283	C	0.00768069	1.00771	0.000840743	6.50478e-20	linear	509377	NA	NA	2	0	0	0.0751289	0.78401	na	logTG
Neutrophill_percentage	Blood Biomarkers	rs5754217	22	21939675	T	0.214834	1.23966	0.0235322	6.8904e-20	linear	516992	NA	NA	2	0.0225382	71.419	3.49883	0.0614122	na	logTG
Neutrophill_percentage	Blood Biomarkers	rs11089629	22	21958872	G	0.214796	1.23961	0.0235302	6.94489e-20	linear	516736	NA	NA	2	0.0192855	68.0164	3.12661	0.0770239	na	HDL
Chronic ulcer of leg or foot	dermatologic	rs56094641	16	53806453	G	0.0997715	1.10492	0.0109307	6.99933e-20	logistic	712424	18446	693978	2	0	0	0.0729712	0.787059	na	HDL
Eosinophill_count	Blood Biomarkers	rs2248162	6	29915061	T	-0.00289967	0.997105	0.000317857	7.33636e-20	linear	530859	NA	NA	2	0	0	0.00930739	0.923143	GABBR1	HDL
HDL_cholesterol	Blood Biomarkers	rs684773	3	135956305	A	0.00887635	1.00892	0.000973109	7.3997e-20	linear	509923	NA	NA	2	0.0129159	90.6748	10.7237	0.00105773	STAG1	logTG
LDL_cor	Blood Biomarkers	rs10832956	11	18645668	T	-0.0201702	0.980032	0.00221223	7.68126e-20	linear	493819	NA	NA	2	0.0293202	67.9221	3.11741	0.0774599	na	LDL
HDL_cholesterol	Blood Biomarkers	rs342469	4	88050554	A	-0.00768309	0.992346	0.000842879	7.84579e-20	linear	509225	NA	NA	2	0	0	0.000773837	0.977807	AFF1	HDL
Red_blood_cell_erythrocyte_count	Blood Biomarkers	rs28687959	4	77421345	C	-0.00723976	0.992786	0.000794716	8.24736e-20	linear	549437	NA	NA	2	0	0	0.223593	0.636316	na	logTG
Calcium	Blood Biomarkers	rs142385484	19	50016759	T	0.00292202	1.00293	0.000321006	8.81379e-20	linear	366106	NA	NA	2	0	0	0.084313	0.771535	FCGRT	LDL,TC,nonHDL
Haematocrit_percentage	Blood Biomarkers	rs3747207	22	44324855	A	0.0719435	1.07459	0.00790376	8.83258e-20	linear	550118	NA	NA	2	0	0	0.435474	0.509315	na	LDL,nonHDL
Chronic ulcer of leg or foot	dermatologic	rs62033400	16	53811788	A	-0.0995385	0.905255	0.0109364	8.90091e-20	logistic	712006	18441	693565	2	0	0	0.000677761	0.97923	na	logTG
Red_blood_cell_erythrocyte_count	Blood Biomarkers	rs713048	15	72543084	A	-0.00845372	0.991582	0.000928865	8.9402e-20	linear	549497	NA	NA	2	0	0	0.589024	0.442797	na	logTG
Obesity	endocrine/metabolic	rs2744944	6	34658080	A	0.0438971	1.04487	0.00482671	9.49183e-20	logistic	709281	153469	555812	2	0.000520647	89.4357	9.46584	0.00209333	na	HDL
Neutrophill_count	Blood Biomarkers	rs76428106	13	28604007	C	0.140908	1.15132	0.0154956	9.59874e-20	linear	517646	NA	NA	2	0	0	0.0828191	0.773513	na	TC
HDL_cholesterol	Blood Biomarkers	rs342467	4	88052219	T	0.00766478	1.00769	0.000842914	9.61643e-20	linear	509171	NA	NA	2	0	0	0.00147505	0.969364	AFF1	LDL
HDL_cholesterol	Blood Biomarkers	rs3803800	17	7462969	A	-0.00916991	0.990872	0.00100861	9.75566e-20	linear	509923	NA	NA	2	0	0	0.605841	0.436358	TP53	HDL
Mean_corpuscular_volume	Blood Biomarkers	rs4665299	2	26256840	C	-0.11	0.895834	0.0121035	1.00612e-19	linear	549621	NA	NA	2	0	0	0.11577	0.733669	HADHA	TC
Red_blood_cell_erythrocyte_distribution_width	Blood Biomarkers	rs964184	11	116648917	G	-0.0285542	0.97185	0.00314223	1.016e-19	linear	533750	NA	NA	2	0.00141443	9.46322	1.10452	0.293276	APOA1	HDL,LDL,TC,logTG,nonHDL
BMI	Physical Measures	rs4796223	17	34841617	G	-0.0841676	0.919277	0.00926513	1.04329e-19	linear	561673	NA	NA	2	9.68195e-05	28.4519	1.39766	0.237116	na	logTG
Mean_platelet_thrombocyte_volume	Blood Biomarkers	rs41301394	7	75612803	C	0.0243904	1.02469	0.00268634	1.09178e-19	linear	532602	NA	NA	2	0	0	0.0828693	0.773446	POR	TC,nonHDL
Hyperlipidemia	endocrine/metabolic	rs186021206	17	7069412	A	-0.365993	0.693508	0.0403341	1.14699e-19	logistic	709266	279879	429387	2	0.0488791	93.6956	15.8619	6.81361e-05	TP53	LDL,TC,nonHDL
LDL_cor	Blood Biomarkers	rs9378248	6	31326289	G	-0.0185958	0.981576	0.00204972	1.16488e-19	linear	492469	NA	NA	2	0.00352985	23.9536	1.31499	0.251494	APOM	logTG
HDL_cholesterol	Blood Biomarkers	rs3818554	6	42934620	T	0.00749556	1.00752	0.000826257	1.17161e-19	linear	509730	NA	NA	2	0	0	0.251595	0.615954	na	nonHDL
Triglycerides	Blood Biomarkers	rs59770119	1	219664627	A	0.0209256	1.02115	0.00230671	1.17248e-19	linear	535009	NA	NA	2	0.010382	93.0855	14.4624	0.000142984	na	HDL
Abdominal aortic aneurysm	circulatory system	rs55730499	6	161005610	C	-0.192532	0.824868	0.0212241	1.17508e-19	logistic	712194	16252	695942	2	0.00205286	54.1092	2.17909	0.139897	IGF2R	TC
Urea	Blood Biomarkers	rs12743272	1	155033334	G	0.0401434	1.04096	0.00442704	1.21459e-19	linear	543684	NA	NA	2	0.0505358	74.7826	3.96551	0.0464414	na	logTG
HDL_cholesterol	Blood Biomarkers	rs342466	4	88053085	C	0.00764284	1.00767	0.000842991	1.23081e-19	linear	509160	NA	NA	2	0	0	0.000551997	0.981256	AFF1	logTG
Albumin	Blood Biomarkers	rs10761750	10	65128619	G	0.0550433	1.05659	0.00607524	1.30136e-19	linear	505260	NA	NA	2	0.0111215	77.1837	4.38283	0.0363027	JMJD1C	LDL
HbA1c	Blood Biomarkers	rs998584	6	43757896	C	-0.125059	0.882445	0.0138088	1.34704e-19	linear	500108	NA	NA	2	0.000559711	32.3903	1.47908	0.223919	VEGFA	TC,logTG,nonHDL
HbA1c	Blood Biomarkers	rs343087	12	66260924	G	-0.179692	0.835528	0.0198427	1.35546e-19	linear	503813	NA	NA	2	0.0114502	82.2384	5.63013	0.0176544	HMGA2	TC
Other chronic ischemic heart disease, unspecified	circulatory system	rs28601761	8	126500031	G	-0.0512547	0.950037	0.00566002	1.35855e-19	logistic	693871	87639	606232	2	0	0	0.533576	0.465107	na	LDL,TC,logTG,nonHDL
Monocyte_count	Blood Biomarkers	rs1584063	3	12266855	A	-0.00442334	0.995586	0.000488666	1.40553e-19	linear	511626	NA	NA	2	0	0	0.0503403	0.822472	PPARG	TC
Cholelithiasis	digestive	rs2085723	4	151206057	G	0.0747383	1.0776	0.00825946	1.44526e-19	logistic	712143	33594	678549	2	0.00200293	93.459	15.2883	9.22885e-05	LRBA	LDL
Actinic keratosis	dermatologic	rs3808460	8	116597635	T	0.0537665	1.05524	0.00594349	1.47913e-19	logistic	712079	90168	621911	2	0	0	0.289293	0.590674	na	HDL
Abdominal aortic aneurysm	circulatory system	rs10455872	6	161010118	A	-0.190043	0.826924	0.0210158	1.52659e-19	logistic	712628	16257	696371	2	0.00223559	56.2596	2.28621	0.130528	PLG	LDL,nonHDL
Red_blood_cell_erythrocyte_distribution_width	Blood Biomarkers	rs59391722	22	21920817	C	0.0245942	1.0249	0.00272092	1.58207e-19	linear	533469	NA	NA	2	0	0	0.272097	0.601928	na	TC
Gout	endocrine/metabolic	rs114165349	1	27021913	G	-0.248523	0.779952	0.0275118	1.66561e-19	logistic	711843	35894	675949	2	0	0	0.10435	0.74667	NR0B2	LDL,TC,logTG,nonHDL
Mean_platelet_thrombocyte_volume	Blood Biomarkers	rs80215559	6	25918225	C	0.04099	1.04184	0.00453774	1.66818e-19	linear	533561	NA	NA	2	0.355252	92.6955	13.6903	0.000215567	na	LDL,TC,nonHDL
Red_blood_cell_erythrocyte_count	Blood Biomarkers	rs6602909	13	114551993	T	-0.00761291	0.992416	0.000844065	1.89228e-19	linear	548814	NA	NA	2	0	0	0.492945	0.482616	GAS6	LDL,TC,logTG,nonHDL
Type 2 diabetes with ophthalmic manifestations	endocrine/metabolic	rs2138157	2	227103717	A	-0.0865616	0.917079	0.00960301	1.98664e-19	logistic	711576	27892	683684	2	0	0	0.575946	0.447906	IRS1	nonHDL
Haemoglobin_concentration	Blood Biomarkers	rs16942887	16	67928042	A	0.0311365	1.03163	0.00345459	2.00355e-19	linear	550969	NA	NA	2	0	0	0.73145	0.392413	LCAT	logTG
Multiple sclerosis	neurological	rs2248162	6	29915061	T	0.205155	1.22772	0.0227656	2.03053e-19	logistic	712438	4123	708315	2	0.0064236	85.8054	7.04496	0.00794888	GABBR1	HDL
LDL_cor	Blood Biomarkers	rs17476364	10	71094504	C	-0.0278994	0.972486	0.0030964	2.05543e-19	linear	493264	NA	NA	2	0.153295	82.8962	5.84665	0.0156068	HK1	LDL,TC,nonHDL
Red_blood_cell_erythrocyte_count	Blood Biomarkers	rs2292318	16	67985706	C	-0.0108969	0.989162	0.00120977	2.10951e-19	linear	550452	NA	NA	2	0	0	0.651095	0.419721	na	HDL
Type 2 diabetes with ophthalmic manifestations	endocrine/metabolic	rs2203452	2	227094758	A	-0.0862637	0.917352	0.0095789	2.14503e-19	logistic	712522	27899	684623	2	0	0	0.735629	0.391065	na	logTG
Neutrophill_count	Blood Biomarkers	rs9378248	6	31326289	G	-0.0301987	0.970253	0.00335372	2.16539e-19	linear	519152	NA	NA	2	0.0396356	86.7339	7.53803	0.00604101	APOM	logTG
Mean_platelet_thrombocyte_volume	Blood Biomarkers	rs1057868	7	75615006	C	0.0240797	1.02437	0.00267433	2.17629e-19	linear	533561	NA	NA	2	0	0	0.190177	0.66277	POR	logTG
Red_blood_cell_erythrocyte_distribution_width	Blood Biomarkers	rs2382818	2	219155907	A	0.0197285	1.01992	0.00219119	2.18564e-19	linear	523401	NA	NA	2	0	0	0.284175	0.593978	CYP27A1	nonHDL
Creatinine	Blood Biomarkers	rs56400413	7	77340821	T	-0.342941	0.70968	0.0381175	2.32081e-19	linear	542883	NA	NA	2	0.102158	89.8732	9.8748	0.00167558	PTPN12	TC
Mean_corpuscular_volume	Blood Biomarkers	rs34265667	8	41542093	A	-0.239125	0.787317	0.0265824	2.34926e-19	linear	550793	NA	NA	2	0	0	0.529868	0.466662	ANK1	TC
Type 2 diabetes with ophthalmic manifestations	endocrine/metabolic	rs2972145	2	227101309	C	0.0860855	1.0899	0.009573	2.41612e-19	logistic	712313	27897	684416	2	0	0	0.603558	0.437224	IRS1	HDL
Lymphocyte_percentage	Blood Biomarkers	rs6734238	2	113841030	G	-0.148281	0.862189	0.01649	2.42348e-19	linear	528555	NA	NA	2	0.0135097	69.1735	3.24396	0.0716873	na	LDL,TC
Type 2 diabetes	endocrine/metabolic	rs429358	19	45411941	C	-0.0602346	0.941544	0.00670055	2.48356e-19	logistic	712628	136891	575737	2	0.000367439	77.0478	4.35688	0.0368598	APOE	HDL
Splenomegaly	digestive	rs3747207	22	44324855	A	0.220318	1.24647	0.0245105	2.50152e-19	logistic	711743	4561	707182	2	0.000479049	18.9497	1.2338	0.266669	na	LDL,nonHDL
Triglycerides	Blood Biomarkers	rs1883711	20	39179822	G	-0.0606285	0.941173	0.00674749	2.57944e-19	linear	539308	NA	NA	2	0.00964797	45.612	1.83864	0.17511	TOP1	LDL,TC,logTG,nonHDL
Hypertension	circulatory system	rs1801253	10	115805056	C	0.0536175	1.05508	0.0059677	2.59655e-19	logistic	706019	112745	593274	2	0	0	0.00882915	0.925138	na	logTG
Red_blood_cell_erythrocyte_distribution_width	Blood Biomarkers	rs4796223	17	34841617	G	-0.0191999	0.980983	0.00213768	2.66717e-19	linear	531764	NA	NA	2	0	0	0.00440263	0.947097	na	logTG
White_blood_cell_leukocyte_count	Blood Biomarkers	rs12943633	17	37970365	T	0.0774309	1.08051	0.00862572	2.78901e-19	linear	539203	NA	NA	2	0.00743846	23.1263	1.30083	0.254061	na	LDL
BMI	Physical Measures	rs35895680	17	47060322	C	0.0904693	1.09469	0.0100811	2.85526e-19	linear	554751	NA	NA	2	0	0	0.0843446	0.771494	na	HDL
Red_blood_cell_erythrocyte_distribution_width	Blood Biomarkers	rs12603276	17	34946547	C	-0.0191337	0.981048	0.00213248	2.89908e-19	linear	533345	NA	NA	2	0	0	0.125481	0.723164	na	nonHDL
Abnormal results of function study of liver	digestive	rs10733608	9	117148430	G	0.0724601	1.07515	0.00807753	2.94971e-19	logistic	701028	35866	665162	2	0.00189753	90.3879	10.4035	0.00125774	na	HDL,TC
Eosinophill_percentage	Blood Biomarkers	rs8073510	17	65839210	A	-0.0467261	0.954349	0.00520891	2.95382e-19	linear	540900	NA	NA	2	0.112669	93.4459	15.2577	9.37932e-05	BPTF	LDL,TC,nonHDL
Gout	endocrine/metabolic	rs75460349	1	27180088	C	0.22227	1.24891	0.0247791	2.96326e-19	logistic	711160	35885	675275	2	0	0	0.0135487	0.907336	ARID1A	HDL
Red_blood_cell_erythrocyte_count	Blood Biomarkers	rs35742417	6	7247344	A	0.00909009	1.00913	0.00101346	2.98217e-19	linear	550686	NA	NA	2	0.0082239	41.368	1.70555	0.191563	na	logTG
Urea	Blood Biomarkers	rs1976668	15	99281192	C	0.0285889	1.029	0.00318792	3.02255e-19	linear	541921	NA	NA	2	0	0	0.563644	0.452796	IGF1R	HDL
HDL_cholesterol	Blood Biomarkers	rs150090666	11	14865399	C	-0.136018	0.872827	0.0151682	3.03967e-19	linear	509526	NA	NA	2	0.414593	68.0979	3.13459	0.0766476	PDE3B	HDL,logTG,nonHDL
Eosinophill_percentage	Blood Biomarkers	rs8071463	17	65938655	G	0.0467019	1.04781	0.00520834	3.05366e-19	linear	540425	NA	NA	2	0.136139	94.454	18.0309	2.17346e-05	BPTF	HDL
LDL_cor	Blood Biomarkers	rs17149279	8	9195638	T	0.0207768	1.02099	0.00231822	3.17681e-19	linear	489239	NA	NA	2	0.110339	87.3696	7.91739	0.00489618	TNKS	logTG
Gout	endocrine/metabolic	rs738408	22	44324730	T	-0.0877185	0.916019	0.0097896	3.23562e-19	logistic	712434	35902	676532	2	0	0	0.801662	0.370597	na	HDL,TC,logTG
Triglycerides	Blood Biomarkers	rs11172134	12	57645789	A	-0.0253282	0.97499	0.00282685	3.25142e-19	linear	538281	NA	NA	2	0	0	0.482097	0.487474	na	LDL
BMI	Physical Measures	rs429358	19	45411941	C	-0.115318	0.891082	0.0128754	3.35265e-19	linear	563664	NA	NA	2	0.00178734	78.2401	4.5956	0.0320541	APOE	HDL
HbA1c	Blood Biomarkers	rs1264377	6	30764907	A	0.159472	1.17289	0.0178069	3.37809e-19	linear	504185	NA	NA	2	0.00338903	62.5269	2.66858	0.102347	na	HDL
LDL_cor	Blood Biomarkers	rs1584063	3	12266855	A	-0.0174274	0.982724	0.00194665	3.47483e-19	linear	492348	NA	NA	2	0.0453341	80.7724	5.20087	0.0225756	PPARG	TC
Mean_corpuscular_volume	Blood Biomarkers	rs754205	13	110411642	A	-0.0903529	0.913609	0.0101053	3.85271e-19	linear	541473	NA	NA	2	0.011351	59.1221	2.44631	0.117801	na	TC
HbA1c	Blood Biomarkers	rs2947795	12	66206798	T	-0.181492	0.834025	0.0203008	3.88721e-19	linear	501090	NA	NA	2	0.0157029	87.0818	7.74101	0.00539805	HMGA2	logTG
Varicose veins	circulatory system	rs17764730	5	127357526	C	-0.110149	0.8957	0.012322	3.9174e-19	logistic	709506	18112	691394	2	0.00443729	90.3627	10.3764	0.00127637	na	HDL
Calcium	Blood Biomarkers	rs17580	14	94847262	T	-0.00458006	0.99543	0.000512387	3.93865e-19	linear	376945	NA	NA	2	0	0	0.0322218	0.857542	SERPINA1	LDL,TC,nonHDL
BMI	Physical Measures	rs2409663	8	10643233	T	-0.0838665	0.919554	0.0093839	3.98868e-19	linear	561568	NA	NA	2	0.000982508	79.7421	4.93635	0.0262976	na	LDL
HDL_cholesterol	Blood Biomarkers	rs4077194	1	178533832	T	-0.00738695	0.99264	0.000826532	3.98891e-19	linear	509361	NA	NA	2	0	0	0.00958944	0.921991	na	HDL
Red_blood_cell_erythrocyte_distribution_width	Blood Biomarkers	rs140490	22	21921686	T	0.024159	1.02445	0.00270405	4.09432e-19	linear	533476	NA	NA	2	0	0	0.045894	0.830369	YDJC	nonHDL
Mean_platelet_thrombocyte_volume	Blood Biomarkers	rs3118362	6	28785085	C	0.0365685	1.03725	0.00409604	4.34626e-19	linear	533561	NA	NA	2	0	0	0.667206	0.414027	TRIM27	LDL,TC,nonHDL
Nontoxic uninodular goiter	endocrine/metabolic	rs4804413	19	7222655	C	0.133051	1.14231	0.0149083	4.47324e-19	logistic	712090	10202	701888	2	0.00140666	48.8946	1.95674	0.161862	INSR	logTG
Disorders of mineral metabolism	endocrine/metabolic	rs806794	6	26200677	A	0.211908	1.23603	0.0237443	4.47418e-19	logistic	712628	5074	707554	2	0.0270433	81.4984	5.40494	0.0200799	HIST1H2BD	HDL
Red_blood_cell_erythrocyte_count	Blood Biomarkers	rs74035509	16	88567333	C	-0.0133742	0.986715	0.00149928	4.64576e-19	linear	547299	NA	NA	2	0	0	0.001418	0.969962	ZFPM1	LDL,nonHDL
Red_blood_cell_erythrocyte_count	Blood Biomarkers	rs2844795	6	30073847	C	-0.00703884	0.992986	0.000789558	4.88217e-19	linear	550686	NA	NA	2	0.00187492	21.6105	1.27568	0.258704	na	TC
Alanine_aminotransferase	Blood Biomarkers	rs13389219	2	165528876	T	-0.257776	0.772768	0.0289232	4.99323e-19	linear	543427	NA	NA	2	0	0	0.676463	0.410807	na	logTG
Triglycerides	Blood Biomarkers	rs1264347	6	30798697	T	-0.0294295	0.970999	0.00330211	4.99754e-19	linear	525858	NA	NA	2	0.00169207	49.9744	1.99898	0.157405	na	logTG
Cholelithiasis	digestive	rs62129968	19	48383542	A	-0.0985845	0.906119	0.0110651	5.12728e-19	logistic	712273	33607	678666	2	0.00556367	95.7431	23.4913	1.25478e-06	na	logTG
Total_bilirubin	Blood Biomarkers	rs855791	22	37462936	G	0.0871359	1.09104	0.00978185	5.20006e-19	linear	532496	NA	NA	2	0	0	0.0329579	0.855941	na	LDL
Cholelithiasis	digestive	rs140879085	2	44663302	T	0.357744	1.4301	0.0401641	5.23998e-19	logistic	709998	33442	676556	2	0.0123847	74.0495	3.85349	0.0496426	na	LDL
Gout	endocrine/metabolic	rs3747207	22	44324855	A	-0.088111	0.915659	0.00989379	5.30564e-19	logistic	711743	35895	675848	2	4.53175e-05	11.0159	1.1238	0.289103	na	LDL,nonHDL
Red_blood_cell_erythrocyte_distribution_width	Blood Biomarkers	rs9379828	6	26167951	G	0.0196401	1.01983	0.00220571	5.3772e-19	linear	533525	NA	NA	2	0	0	0.778151	0.377707	HIST1H2BD	logTG
Monocyte_count	Blood Biomarkers	rs3808460	8	116597635	T	0.00436703	1.00438	0.00049071	5.61446e-19	linear	512937	NA	NA	2	0	0	0.858217	0.354238	na	HDL
Iron deficiency anemias, unspecified or not due to blood loss	hematopoietic	rs80215559	6	25918225	C	-0.13449	0.874161	0.0151142	5.67353e-19	logistic	712628	41916	670712	2	0.000954541	67.0321	3.03325	0.0815744	na	LDL,TC,nonHDL
Eosinophill_count	Blood Biomarkers	rs1151996	3	12445807	C	-0.00280398	0.9972	0.00031521	5.81037e-19	linear	529979	NA	NA	2	0	0	0.774393	0.378861	PPARG	nonHDL
Hematuria	genitourinary	rs1264377	6	30764907	A	-0.0795017	0.923576	0.00893893	5.90165e-19	logistic	712628	52337	660291	2	0.00251444	93.7842	16.0881	6.04631e-05	na	HDL
Red_blood_cell_erythrocyte_distribution_width	Blood Biomarkers	rs11089629	22	21958872	G	0.0240295	1.02432	0.00270189	5.91798e-19	linear	533494	NA	NA	2	0	0	0.0113162	0.915283	na	HDL
Haematocrit_percentage	Blood Biomarkers	rs1476306	16	67973171	C	-0.07795	0.925011	0.00876672	6.02492e-19	linear	550620	NA	NA	2	0	0	0.536031	0.464082	LCAT	TC
HDL_cholesterol	Blood Biomarkers	rs10422861	19	33894846	T	0.00777879	1.00781	0.000874972	6.09299e-19	linear	508891	NA	NA	2	0	0	0.230688	0.631014	CEBPA	logTG
Myocardial infarction	circulatory system	rs3184504	12	111884608	T	0.0603221	1.06218	0.00678734	6.25336e-19	logistic	712628	48726	663902	2	0.000626851	85.8336	7.05897	0.00788695	ALDH2	HDL
Haematocrit_percentage	Blood Biomarkers	rs11407151	6	130367863	T	-0.0613854	0.940461	0.00690766	6.30216e-19	linear	550465	NA	NA	2	0	0	0.111485	0.73846	na	LDL
Red_blood_cell_erythrocyte_distribution_width	Blood Biomarkers	rs5754217	22	21939675	T	0.0240159	1.02431	0.00270251	6.30519e-19	linear	533750	NA	NA	2	0	0	0.059995	0.806504	na	logTG
Hyperlipidemia	endocrine/metabolic	rs200489612	17	7106378	A	-0.387609	0.678678	0.0436339	6.49625e-19	logistic	709957	279953	430004	2	0.0264868	87.4299	7.95541	0.00479437	TP53	logTG
HDL_cholesterol	Blood Biomarkers	rs4418728	10	94839724	T	0.00734891	1.00738	0.000827356	6.54308e-19	linear	509523	NA	NA	2	0.00147077	67.7733	3.10302	0.0781472	na	HDL,TC,logTG,nonHDL
Type 2 diabetes	endocrine/metabolic	rs11688682	2	121347612	G	0.0576981	1.0594	0.00649582	6.54698e-19	logistic	670312	134080	536232	2	6.00436e-05	39.7416	1.65952	0.197668	na	HDL
Red_blood_cell_erythrocyte_count	Blood Biomarkers	rs1264377	6	30764907	A	-0.00906988	0.990971	0.00102126	6.62072e-19	linear	550686	NA	NA	2	0.0119697	49.2532	1.97057	0.160388	na	HDL
HDL_cholesterol	Blood Biomarkers	rs4805881	19	33896432	A	-0.00776509	0.992265	0.000874482	6.70721e-19	linear	509200	NA	NA	2	0	0	0.180322	0.671097	na	HDL
Obesity	endocrine/metabolic	rs2613505	1	72835410	C	-0.0546427	0.946823	0.00615395	6.7286e-19	logistic	710880	153569	557311	2	6.08262e-05	38.9605	1.63828	0.200561	na	logTG
Type 2 diabetes	endocrine/metabolic	rs6066149	20	45602638	G	0.0470448	1.04817	0.00530255	7.17715e-19	logistic	710788	136776	574012	2	0.000436062	86.2907	7.29433	0.00691724	na	HDL
Mean_corpuscular_haemoglobin	Blood Biomarkers	rs80297745	12	53801461	C	0.0473049	1.04844	0.00533212	7.2042e-19	linear	549725	NA	NA	2	0	0	0.654699	0.418438	na	nonHDL
Mean_platelet_thrombocyte_volume	Blood Biomarkers	rs12303671	12	124492610	G	0.0227361	1.023	0.00256395	7.47232e-19	linear	531380	NA	NA	2	0	0	0.44833	0.503129	na	logTG
Lymphocyte_percentage	Blood Biomarkers	rs62551047	9	91434086	A	-0.302611	0.738887	0.0341268	7.49722e-19	linear	526096	NA	NA	2	0.0174212	39.0982	1.64199	0.200053	na	LDL
Cholelithiasis	digestive	rs2291428	10	45958856	G	-0.0809457	0.922244	0.00913043	7.61765e-19	logistic	710176	33500	676676	2	0.00122636	87.8168	8.208	0.0041706	na	TC
BMI	Physical Measures	rs10518739	15	68014971	T	0.0825564	1.08606	0.00931682	7.92948e-19	linear	562321	NA	NA	2	0	0	0.447809	0.503377	na	HDL
LDL_cor	Blood Biomarkers	rs7904973	10	124693587	G	-0.0173359	0.982813	0.00195693	8.09318e-19	linear	493984	NA	NA	2	0.0417082	79.1098	4.78693	0.0286765	na	LDL,TC,nonHDL
Mean_corpuscular_haemoglobin	Blood Biomarkers	rs28601761	8	126500031	G	-0.0371495	0.963532	0.00419626	8.51858e-19	linear	532612	NA	NA	2	0	0	0.230016	0.631512	na	LDL,TC,logTG,nonHDL
Lymphocyte_percentage	Blood Biomarkers	rs9410381	9	91454519	T	-0.300209	0.740664	0.0339105	8.52148e-19	linear	527195	NA	NA	2	0.0171534	38.6529	1.63007	0.201694	na	TC
Hypercholesterolemia	endocrine/metabolic	rs2000999	16	72108093	G	-0.0514691	0.949833	0.00581854	9.09561e-19	logistic	712628	116844	595784	2	7.32702e-05	51.771	2.07344	0.149883	na	logTG
LDL_cor	Blood Biomarkers	rs12562207	1	16508059	G	-0.0176336	0.982521	0.00199361	9.15022e-19	linear	493922	NA	NA	2	0.0115211	50.1101	2.00441	0.156842	na	logTG
TC_cor	Blood Biomarkers	rs2844795	6	30073847	C	-0.0320916	0.968418	0.00362885	9.27995e-19	linear	494687	NA	NA	2	0.166278	91.8709	12.3014	0.000452611	na	TC
HDL_cholesterol	Blood Biomarkers	rs11217133	11	118928249	A	-0.00747706	0.992551	0.000845585	9.36245e-19	linear	508264	NA	NA	2	0.00151707	65.5651	2.90403	0.0883583	na	HDL
Mean_corpuscular_volume	Blood Biomarkers	rs73079476	12	21343833	A	0.120632	1.12821	0.013649	9.73237e-19	linear	548838	NA	NA	2	0	0	0.345187	0.556851	na	logTG
Albumin	Blood Biomarkers	rs3184504	12	111884608	T	-0.053629	0.947784	0.00606799	9.74365e-19	linear	505330	NA	NA	2	0.0572695	94.8344	19.3589	1.08313e-05	ALDH2	HDL
HDL_cholesterol	Blood Biomarkers	rs1711171	3	136020541	T	0.00843395	1.00847	0.000954621	1.00211e-18	linear	507461	NA	NA	2	0.0124736	92.2369	12.8814	0.000331856	STAG1	LDL
Mean_corpuscular_volume	Blood Biomarkers	rs55979739	16	31049155	A	-0.0887234	0.915099	0.0100457	1.02867e-18	linear	550649	NA	NA	2	0	0	0.452749	0.501032	HSD3B7	nonHDL
HbA1c	Blood Biomarkers	rs11967262	6	43760327	G	0.121324	1.12899	0.0137371	1.0302e-18	linear	503026	NA	NA	2	0.000816045	41.5079	1.70963	0.191033	VEGFA	HDL
Lymphocyte_percentage	Blood Biomarkers	rs7808446	7	150214465	G	-0.170131	0.843554	0.0192655	1.03857e-18	linear	525171	NA	NA	2	0.000603535	6.82857	1.07329	0.300203	na	logTG
HbA1c	Blood Biomarkers	rs1151996	3	12445807	C	-0.124868	0.882614	0.0141484	1.08916e-18	linear	503147	NA	NA	2	0.0158731	92.975	14.2349	0.000161351	PPARG	nonHDL
Abnormal results of function study of liver	digestive	rs2980888	8	126507308	T	0.0757356	1.07868	0.00858227	1.09794e-18	logistic	712299	36053	676246	2	0.00622785	96.402	27.7931	1.35005e-07	TRIB1	HDL
HDL_cholesterol	Blood Biomarkers	rs17052061	3	52346240	G	0.00944352	1.00949	0.00107016	1.10045e-18	linear	509283	NA	NA	2	0	0	0.596249	0.440013	GLYCTK	logTG
HDL_cholesterol	Blood Biomarkers	rs2068888	10	94839642	A	0.0072967	1.00732	0.000827017	1.11524e-18	linear	509923	NA	NA	2	0.00245854	78.0925	4.56465	0.0326384	CYP26A1	LDL
HDL_cholesterol	Blood Biomarkers	rs2395943	6	42940673	G	0.00737319	1.0074	0.000836179	1.16808e-18	linear	509923	NA	NA	2	0	0	0.976238	0.323129	PEX6	LDL
Red_blood_cell_erythrocyte_distribution_width	Blood Biomarkers	rs221793	7	100280896	C	-0.0310441	0.969433	0.00352167	1.19514e-18	linear	529252	NA	NA	2	0	0	0.0630905	0.801676	TSC22D4	LDL,TC,nonHDL
HDL_cholesterol	Blood Biomarkers	rs1457489	18	57861961	G	0.00821844	1.00825	0.000932456	1.21023e-18	linear	508151	NA	NA	2	0.00924211	90.8735	10.9571	0.000932432	na	logTG
Aspartate_aminotransferase	Blood Biomarkers	rs622871	6	31878495	A	-0.214009	0.807341	0.0242889	1.2405e-18	linear	530625	NA	NA	2	0	0	0.538974	0.462858	APOM	logTG
Mean_platelet_thrombocyte_volume	Blood Biomarkers	rs12538001	7	158511941	C	0.023282	1.02356	0.00264356	1.28444e-18	linear	528490	NA	NA	2	0	0	0.433476	0.510288	ESYT2	TC
Type 2 diabetes	endocrine/metabolic	rs6066138	20	45594711	A	-0.0463783	0.954681	0.00526638	1.29132e-18	logistic	710677	136760	573917	2	0.000449771	86.7275	7.53436	0.00605333	na	logTG
LDL_cor	Blood Biomarkers	rs3893464	6	29935250	G	-0.0170143	0.98313	0.00193329	1.35967e-18	linear	494133	NA	NA	2	0.0193094	64.9108	2.84988	0.0913809	na	LDL
Iron deficiency anemias, unspecified or not due to blood loss	hematopoietic	rs11549407	11	5248004	A	1.43054	4.18095	0.162563	1.36928e-18	logistic	712247	41908	670339	2	0	0	0.762451	0.382563	na	TC
Haematocrit_percentage	Blood Biomarkers	rs9388766	6	130354855	T	-0.0621751	0.939718	0.0070673	1.39798e-18	linear	549358	NA	NA	2	0	0	0.0584653	0.808938	na	logTG
Abdominal aortic aneurysm	circulatory system	rs7528419	1	109817192	G	-0.126189	0.881448	0.0143437	1.39887e-18	logistic	712628	16257	696371	2	0.0058813	85.3976	6.84821	0.00887304	na	logTG
Mean_corpuscular_volume	Blood Biomarkers	rs11076	16	30995528	G	-0.0890055	0.914841	0.0101218	1.45006e-18	linear	547060	NA	NA	2	0	0	0.457176	0.498947	na	TC
TC_cor	Blood Biomarkers	rs11657987	17	76387363	G	-0.0324937	0.968029	0.00369555	1.46079e-18	linear	479941	NA	NA	2	0.184555	92.3888	13.1386	0.000289275	na	LDL,TC,nonHDL
Cholelithiasis	digestive	rs11394256	10	45957247	C	-0.0802192	0.922914	0.00912374	1.46449e-18	logistic	711411	33565	677846	2	0.00116172	87.2471	7.84136	0.00510641	na	nonHDL
Haemoglobin_concentration	Blood Biomarkers	rs28687959	4	77421345	C	-0.0195544	0.980636	0.00222406	1.46647e-18	linear	549720	NA	NA	2	0	0	0.232128	0.62995	na	logTG
Alanine_aminotransferase	Blood Biomarkers	rs1711171	3	136020541	T	-0.291502	0.747141	0.0331595	1.48384e-18	linear	540893	NA	NA	2	0.0100486	69.3284	3.26034	0.0709744	STAG1	LDL
Haematocrit_percentage	Blood Biomarkers	rs9296208	6	37029684	C	-0.0574486	0.94417	0.00653575	1.49682e-18	linear	546261	NA	NA	2	0	0	0.825217	0.363659	na	nonHDL
Triglycerides	Blood Biomarkers	rs2903809	20	44552895	A	-0.0226217	0.977632	0.00257587	1.60352e-18	linear	541357	NA	NA	2	0	0	0.0392972	0.842861	PLTP	LDL
LDL_cor	Blood Biomarkers	rs10846744	12	125312425	G	-0.0243655	0.975929	0.00277476	1.61889e-18	linear	494153	NA	NA	2	0	0	0.0766029	0.781955	na	LDL,logTG,nonHDL
Red_blood_cell_erythrocyte_distribution_width	Blood Biomarkers	rs72812818	5	173356752	C	-0.0204145	0.979792	0.00232503	1.62981e-18	linear	532196	NA	NA	2	0.0466519	85.6215	6.95485	0.00835924	CPEB4	HDL,logTG
Triglycerides	Blood Biomarkers	rs6001029	22	38555193	A	-0.0208471	0.979369	0.00237498	1.66707e-18	linear	540532	NA	NA	2	0	0	0.874173	0.349803	na	nonHDL
Eosinophill_percentage	Blood Biomarkers	rs4955411	3	49145304	A	-0.0434638	0.957467	0.00495282	1.70068e-18	linear	541036	NA	NA	2	0.00137055	16.3003	1.19475	0.274374	WDR6	logTG
Gout	endocrine/metabolic	rs1321505	6	28052823	C	0.100659	1.1059	0.0114715	1.71382e-18	logistic	712623	35905	676718	2	0	0	0.385688	0.534575	ZKSCAN4	HDL
Neutrophill_count	Blood Biomarkers	rs906578	2	65601600	A	0.0278808	1.02827	0.00317746	1.71587e-18	linear	518574	NA	NA	2	0	0	0.310033	0.57766	na	TC
Mean_corpuscular_haemoglobin	Blood Biomarkers	rs13201681	6	28394680	T	-0.055107	0.946384	0.00628065	1.72292e-18	linear	550776	NA	NA	2	0	0	0.261654	0.608986	TRIM27	logTG
Gout	endocrine/metabolic	rs13201681	6	28394680	T	0.116741	1.12383	0.0133064	1.73602e-18	logistic	712587	35904	676683	2	0	0	0.290364	0.589988	TRIM27	logTG
CRP	Blood Biomarkers	rs4841133	8	9183664	A	-0.146812	0.863456	0.0167379	1.76693e-18	linear	414633	NA	NA	2	0.0122199	78.1604	4.57884	0.0323691	TNKS	nonHDL
Hyperlipidemia	endocrine/metabolic	rs2740488	9	107661742	C	-0.0455034	0.955516	0.00518805	1.77389e-18	logistic	710659	279999	430660	2	0	0	0.0814921	0.775285	ABCA1	HDL,TC,nonHDL
Triglycerides	Blood Biomarkers	rs76895963	12	4384844	G	-0.0857656	0.917809	0.00978112	1.81085e-18	linear	530873	NA	NA	2	0.125968	87.9601	8.30569	0.0039521	na	LDL,TC,logTG,nonHDL
LDL_cor	Blood Biomarkers	rs7758845	6	135428537	C	-0.0190388	0.981141	0.00217179	1.84417e-18	linear	492917	NA	NA	2	0.178009	92.8264	13.9401	0.000188732	na	HDL
LDL_cor	Blood Biomarkers	rs704	17	26694861	A	0.0169446	1.01709	0.00193331	1.87558e-18	linear	494153	NA	NA	2	0.24779	95.9382	24.6195	6.98422e-07	TRAF4	LDL,logTG,nonHDL
LDL_cor	Blood Biomarkers	rs41272086	6	161008646	G	0.0275078	1.02789	0.00313876	1.88578e-18	linear	493332	NA	NA	2	0.557304	94.4532	18.0283	2.17645e-05	IGF2R	HDL,logTG
Hypothyroidism NOS	endocrine/metabolic	rs2248162	6	29915061	T	0.0544878	1.056	0.00621767	1.895e-18	logistic	712438	66024	646414	2	4.89762e-05	37.0846	1.58944	0.207407	GABBR1	HDL
HbA1c	Blood Biomarkers	rs181058325	6	25314597	G	-0.235546	0.79014	0.0268892	1.955e-18	linear	500470	NA	NA	2	0.0179456	77.8553	4.51575	0.0335842	na	LDL,TC,nonHDL
Mean_corpuscular_volume	Blood Biomarkers	rs12048743	1	205114873	C	0.0860692	1.08988	0.0098255	1.95644e-18	linear	549851	NA	NA	2	0.0381213	84.0852	6.28345	0.0121871	na	nonHDL
Calcium	Blood Biomarkers	rs74612335	11	126238633	T	0.00285818	1.00286	0.000326375	1.99905e-18	linear	374683	NA	NA	2	0	0	0.97972	0.322268	na	TC
HDL_cholesterol	Blood Biomarkers	rs6542680	2	3640142	C	0.00952592	1.00957	0.00108788	2.01547e-18	linear	503525	NA	NA	2	0.000246274	17.6835	1.21482	0.270379	na	TC,logTG
Albumin	Blood Biomarkers	rs2820441	1	219734960	C	-0.0568891	0.944699	0.00649804	2.0445e-18	linear	505330	NA	NA	2	0	0	0.483677	0.486762	na	logTG
Red_blood_cell_erythrocyte_count	Blood Biomarkers	rs13107325	4	103188709	C	-0.0131784	0.986908	0.00150543	2.06034e-18	linear	550686	NA	NA	2	0.132851	85.4673	6.88105	0.00871143	na	HDL,LDL,TC,logTG
Other non-epithelial cancer of skin	neoplasms	rs35062987	6	32590735	C	-0.069713	0.932661	0.00796377	2.06349e-18	logistic	712538	60122	652416	2	0.000253526	55.157	2.23	0.135354	BRD2	TC
CRP	Blood Biomarkers	rs4841132	8	9183596	A	-0.146802	0.863465	0.0167731	2.09257e-18	linear	414734	NA	NA	2	0.0124987	78.4586	4.64222	0.0311947	TNKS	HDL,LDL,TC
CRP	Blood Biomarkers	rs1412445	10	91002804	T	0.0895416	1.09367	0.0102319	2.111e-18	linear	413822	NA	NA	2	0.00536203	80.1841	5.04646	0.0246764	LIPA	LDL
Mean_corpuscular_haemoglobin	Blood Biomarkers	rs2608301	12	53793314	C	0.0464623	1.04756	0.00530938	2.11514e-18	linear	549697	NA	NA	2	0.000566379	4.48244	1.04693	0.306216	na	LDL
Albumin	Blood Biomarkers	rs653178	12	112007756	C	-0.053094	0.948291	0.00606763	2.12663e-18	linear	505330	NA	NA	2	0.0558813	94.7175	18.9304	1.35577e-05	ALDH2	LDL,TC,nonHDL
Myocardial infarction	circulatory system	rs653178	12	112007756	C	0.0593817	1.06118	0.00678683	2.14205e-18	logistic	712628	48726	663902	2	0.000711877	87.3088	7.87949	0.00499985	ALDH2	LDL,TC,nonHDL
Eosinophill_percentage	Blood Biomarkers	rs11656743	17	65980289	A	-0.0449117	0.956082	0.00513335	2.15236e-18	linear	539445	NA	NA	2	0.103735	93.1877	14.6794	0.000127433	BPTF	logTG
Atherosclerosis of the extremities	circulatory system	rs55730499	6	161005610	C	-0.229581	0.794866	0.0262461	2.186e-18	logistic	712194	9745	702449	2	0	0	0.965606	0.325779	IGF2R	TC
Mean_platelet_thrombocyte_volume	Blood Biomarkers	rs7730247	5	131781288	C	-0.0272344	0.973133	0.00311439	2.23661e-18	linear	531348	NA	NA	2	0.0414554	80.4311	5.11015	0.0237863	IRF1	nonHDL
Total_bilirubin	Blood Biomarkers	rs11636087	15	63788267	T	-0.0946041	0.909733	0.0108193	2.25026e-18	linear	524369	NA	NA	2	0.000932155	22.1988	1.28533	0.256911	HERC1	LDL
Cholelithiasis	digestive	rs11239551	10	46026107	G	-0.0800101	0.923107	0.00915283	2.29884e-18	logistic	709391	33467	675924	2	0.00117622	87.3155	7.88364	0.0049884	na	HDL
Alanine_aminotransferase	Blood Biomarkers	rs10184004	2	165508389	T	-0.252413	0.776924	0.0288757	2.30319e-18	linear	542966	NA	NA	2	0	0	0.528101	0.467406	na	LDL,TC,nonHDL
Hyperlipidemia	endocrine/metabolic	rs1883025	9	107664301	T	-0.0449446	0.95605	0.00514169	2.30613e-18	logistic	712628	280273	432355	2	0	0	0.073946	0.785676	ABCA1	LDL
TC_cor	Blood Biomarkers	rs186021206	17	7069412	A	-0.243394	0.783962	0.0278674	2.45805e-18	linear	491469	NA	NA	2	22.3794	92.5451	13.414	0.00024975	TP53	LDL,TC,nonHDL
HDL_cholesterol	Blood Biomarkers	rs3820897	2	3642361	C	-0.00951496	0.99053	0.0010896	2.49036e-18	linear	502957	NA	NA	2	0	0	0.456788	0.499129	na	HDL,LDL
Monocyte_count	Blood Biomarkers	rs10892870	11	122517803	A	-0.00436622	0.995643	0.000500005	2.4945e-18	linear	511460	NA	NA	2	0	0	0.860183	0.353687	na	HDL
Haemoglobin_concentration	Blood Biomarkers	rs1434282	1	199010721	C	0.0217614	1.022	0.00249304	2.57257e-18	linear	545929	NA	NA	2	0	0	0.97431	0.323608	PTPRC	LDL,TC
Haematocrit_percentage	Blood Biomarkers	rs16942887	16	67928042	A	0.0886038	1.09265	0.0101514	2.58604e-18	linear	550975	NA	NA	2	0.00777868	30.7318	1.44366	0.229547	LCAT	logTG
Type 2 diabetes	endocrine/metabolic	rs8081417	17	3902650	A	0.0453897	1.04644	0.00520086	2.60733e-18	logistic	709309	136668	572641	2	0	0	0.0312139	0.859764	ZZEF1	HDL
Type 2 diabetes	endocrine/metabolic	rs2540949	2	65284231	A	0.042213	1.04312	0.0048379	2.65064e-18	logistic	711293	136800	574493	2	4.07772e-05	41.1228	1.69845	0.192491	na	HDL
Aspartate_aminotransferase	Blood Biomarkers	rs2517601	6	30074072	C	-0.285803	0.751411	0.0327576	2.66689e-18	linear	533846	NA	NA	2	0.0146147	67.2564	3.05404	0.0805368	na	logTG
HDL_cholesterol	Blood Biomarkers	rs148889882	6	34141700	A	-0.0185868	0.981585	0.00213054	2.68608e-18	linear	509623	NA	NA	2	0	0	0.530049	0.466586	na	HDL
LDL_cor	Blood Biomarkers	rs7581601	2	203497786	C	-0.0182951	0.981871	0.00209714	2.68857e-18	linear	490519	NA	NA	2	0.161595	92.7614	13.8149	0.000201732	SUMO1	HDL
LDL_cor	Blood Biomarkers	rs9496614	6	100613551	C	-0.0197015	0.980491	0.0022591	2.75907e-18	linear	491904	NA	NA	2	0.231675	93.6856	15.8368	6.90478e-05	na	TC,logTG
Alanine_aminotransferase	Blood Biomarkers	rs77303550	16	72079657	T	-0.316305	0.728837	0.0362706	2.76447e-18	linear	542052	NA	NA	2	0.00174179	24.7566	1.32902	0.248979	AP1G1	LDL,TC
Total_bilirubin	Blood Biomarkers	rs964184	11	116648917	G	0.123611	1.13158	0.0141749	2.77107e-18	linear	540620	NA	NA	2	0.100336	95.038	20.153	7.14868e-06	APOA1	HDL,LDL,TC,logTG,nonHDL
Thyrotoxicosis with or without goiter	endocrine/metabolic	rs2517601	6	30074072	C	0.196731	1.21742	0.0225636	2.80756e-18	logistic	707417	8505	698912	2	0.0190454	94.8291	19.3391	1.09442e-05	na	logTG
Triglycerides	Blood Biomarkers	rs11878908	19	49227443	C	-0.0198492	0.980346	0.00227661	2.81248e-18	linear	541771	NA	NA	2	0.000206878	22.578	1.29162	0.255749	NUCB1	TC
Aspartate_aminotransferase	Blood Biomarkers	rs1264347	6	30798697	T	-0.285372	0.751735	0.0327329	2.82681e-18	linear	522176	NA	NA	2	0.0395999	85.5293	6.9105	0.00856909	na	logTG
HDL_cholesterol	Blood Biomarkers	rs2307111	5	75003678	T	-0.00735537	0.992672	0.000843829	2.86527e-18	linear	509923	NA	NA	2	0	0	1.31616e-05	0.997105	na	HDL
Haemoglobin_concentration	Blood Biomarkers	rs1529585	3	69870595	A	-0.0194219	0.980766	0.00222831	2.88274e-18	linear	550260	NA	NA	2	0	0	0.101098	0.750515	na	logTG
Albumin	Blood Biomarkers	rs4655772	1	66130398	A	-0.0534224	0.94798	0.00613136	2.95991e-18	linear	497795	NA	NA	2	0	0	0.369439	0.54331	LEPR	LDL
Hypertension	circulatory system	rs2409663	8	10643233	T	-0.0457324	0.955298	0.00524936	2.98613e-18	logistic	710493	113931	596562	2	0.00544119	58.5814	2.41437	0.120226	na	LDL
Haematocrit_percentage	Blood Biomarkers	rs115383270	1	161531340	G	-0.112683	0.893433	0.0129402	3.09297e-18	linear	542578	NA	NA	2	0.00486925	12.0071	1.13646	0.286402	na	LDL,TC
Type 2 diabetes	endocrine/metabolic	rs6889847	5	53303452	G	-0.0465443	0.954522	0.00534598	3.13652e-18	logistic	712501	136884	575617	2	0	0	0.0245243	0.875558	na	logTG
Alanine_aminotransferase	Blood Biomarkers	rs684773	3	135956305	A	-0.297999	0.742302	0.0342304	3.15682e-18	linear	543580	NA	NA	2	0.00336587	38.0553	1.61434	0.203883	STAG1	logTG
LDL_cor	Blood Biomarkers	rs9496567	6	100602753	A	-0.0197173	0.980476	0.00226609	3.28967e-18	linear	491486	NA	NA	2	0.220843	93.667	15.7903	7.0763e-05	na	LDL
Neurological disorders	mental disorders	rs483082	19	45416178	G	-0.123517	0.883807	0.0141968	3.30935e-18	logistic	710112	13757	696355	2	0.00190798	81.8458	5.50836	0.0189258	APOE	logTG
Disorders of mineral metabolism	endocrine/metabolic	rs9379828	6	26167951	G	-0.185158	0.830973	0.0212818	3.31021e-18	logistic	712396	5073	707323	2	0.018495	76.7778	4.30623	0.037973	HIST1H2BD	logTG
Nontoxic nodular goiter	endocrine/metabolic	rs4804413	19	7222655	C	0.213343	1.23781	0.0245251	3.34966e-18	logistic	712090	3630	708460	2	0	0	0.525611	0.468458	INSR	logTG
Aspartate_aminotransferase	Blood Biomarkers	rs1233393	6	29549653	G	-0.292601	0.74632	0.033637	3.35464e-18	linear	538645	NA	NA	2	0.0019647	20.2104	1.2533	0.262924	na	logTG
Haemoglobin_concentration	Blood Biomarkers	rs9296208	6	37029684	C	-0.0193372	0.980849	0.00222384	3.45573e-18	linear	546255	NA	NA	2	0	0	0.561511	0.453652	na	nonHDL
LDL_cor	Blood Biomarkers	rs17789218	6	100600097	C	-0.0195672	0.980623	0.00225035	3.46304e-18	linear	494153	NA	NA	2	0.240753	94.4104	17.8904	2.33998e-05	na	nonHDL
Hyperlipidemia	endocrine/metabolic	rs17725246	7	44581986	T	-0.0509585	0.950318	0.00586499	3.66946e-18	logistic	712447	280250	432197	2	0	0	0.191386	0.661766	OGDH	LDL,TC,nonHDL
BMI	Physical Measures	rs1711171	3	136020541	T	-0.0943158	0.909995	0.0108554	3.67535e-18	linear	560893	NA	NA	2	0	0	0.00200668	0.96427	STAG1	LDL
Coronary atherosclerosis	circulatory system	rs10096633	8	19830921	T	-0.0642414	0.937779	0.00739685	3.78847e-18	logistic	712628	123318	589310	2	0.000181081	57.2064	2.3368	0.126349	LPL	nonHDL
Hypothyroidism NOS	endocrine/metabolic	rs1265097	6	31106459	C	-0.0850071	0.918506	0.00979245	3.92721e-18	logistic	712628	66030	646598	2	0.00334882	93.7836	16.0864	6.05162e-05	PRRC2A	LDL,nonHDL
Urea	Blood Biomarkers	rs4493564	4	77420407	G	0.0275406	1.02792	0.00317434	4.09864e-18	linear	542109	NA	NA	2	0.019965	69.8121	3.31258	0.0687514	na	LDL
Type 2 diabetes	endocrine/metabolic	rs17109256	14	79939993	A	0.0494317	1.05067	0.00569775	4.11202e-18	logistic	712110	136855	575255	2	0	0	0.431413	0.511297	na	HDL
White_blood_cell_leukocyte_count	Blood Biomarkers	rs1584063	3	12266855	A	-0.0402966	0.960504	0.00464624	4.21067e-18	linear	539034	NA	NA	2	0	0	0.157994	0.69101	PPARG	TC
Triglycerides	Blood Biomarkers	rs11045171	12	20470199	G	-0.0248968	0.975411	0.00287107	4.25971e-18	linear	538008	NA	NA	2	0	0	0.13452	0.713791	PDE3A	logTG
Varicose veins of lower extremity, symptomtic	circulatory system	rs56094641	16	53806453	G	0.112262	1.11881	0.012948	4.3136e-18	logistic	712424	12972	699452	2	0.000242217	21.2611	1.27002	0.259763	na	HDL
Monocyte_percentage	Blood Biomarkers	rs7530780	1	93130268	C	0.0532551	1.0547	0.00614709	4.57637e-18	linear	529082	NA	NA	2	0.00274483	29.3191	1.41481	0.23426	GFI1	TC
HDL_cholesterol	Blood Biomarkers	rs1534696	7	26397239	C	-0.00715455	0.992871	0.000825923	4.61576e-18	linear	509923	NA	NA	2	0.0027293	77.3536	4.4157	0.0356096	CBX3	HDL
Albumin	Blood Biomarkers	rs11208700	1	66133443	A	-0.0530983	0.948287	0.00613025	4.64833e-18	linear	497902	NA	NA	2	0	0	0.398724	0.527749	LEPR	TC
Triglycerides	Blood Biomarkers	rs709821	8	11702594	G	-0.0222497	0.977996	0.00256906	4.69164e-18	linear	542206	NA	NA	2	0.000868041	48.8573	1.95531	0.162016	CTSB	TC
Direct_bilirubin	Blood Biomarkers	rs34265667	8	41542093	A	0.0476521	1.04881	0.00550268	4.72558e-18	linear	424476	NA	NA	2	0.00758779	42.2817	1.73255	0.188085	ANK1	TC
Psoriasis	dermatologic	rs2524143	6	31263510	T	-0.212159	0.808836	0.0245074	4.84624e-18	logistic	711244	4422	706822	2	0.0171888	84.3027	6.37051	0.0116032	APOM	TC
HDL_cholesterol	Blood Biomarkers	rs9472125	6	43756169	T	0.012641	1.01272	0.00146032	4.87061e-18	linear	478773	NA	NA	2	0.00657675	74.846	3.97551	0.0461665	VEGFA	LDL
Neutrophill_percentage	Blood Biomarkers	rs7808446	7	150214465	G	0.191136	1.21062	0.0220871	4.9828e-18	linear	513608	NA	NA	2	0.0109747	57.3371	2.34395	0.12577	na	logTG
Mean_corpuscular_haemoglobin	Blood Biomarkers	rs6120879	20	30202961	C	0.0480096	1.04918	0.00555276	5.32989e-18	linear	549219	NA	NA	2	0	0	0.281993	0.595398	HM13	logTG
Haemoglobin_concentration	Blood Biomarkers	rs2749013	6	52627165	A	-0.0199849	0.980213	0.00231154	5.34624e-18	linear	550074	NA	NA	2	0	0	0.637346	0.424674	GSTA1	HDL
Triglycerides	Blood Biomarkers	rs11045172	12	20470221	A	0.0248054	1.02512	0.00286941	5.3916e-18	linear	538001	NA	NA	2	0	0	0.169399	0.680646	PDE3A	HDL
Mean_corpuscular_volume	Blood Biomarkers	rs964184	11	116648917	G	-0.123822	0.883537	0.0143244	5.4202e-18	linear	550793	NA	NA	2	0	0	0.0532964	0.817423	APOA1	HDL,LDL,TC,logTG,nonHDL
Abdominal aortic aneurysm	circulatory system	rs429358	19	45411941	C	0.138918	1.14903	0.0160746	5.51874e-18	logistic	712628	16257	696371	2	0.00113475	50.2941	2.01183	0.156076	APOE	HDL
Varicose veins of lower extremity, symptomtic	circulatory system	rs62033400	16	53811788	A	-0.111914	0.894121	0.0129502	5.52762e-18	logistic	712006	12972	699034	2	0	0	0.903755	0.341777	na	logTG
Mean_corpuscular_haemoglobin	Blood Biomarkers	rs738408	22	44324730	T	0.0423678	1.04328	0.00490401	5.65006e-18	linear	550629	NA	NA	2	0	0	0.313536	0.575518	na	HDL,TC,logTG
LDL_cor	Blood Biomarkers	rs2251024	12	51103633	T	-0.0175409	0.982612	0.00203049	5.68477e-18	linear	493991	NA	NA	2	0	0	0.0202565	0.886823	na	LDL,TC,nonHDL
Type 2 diabetes with ophthalmic manifestations	endocrine/metabolic	rs10184004	2	165508389	T	-0.0800242	0.923094	0.00926582	5.79655e-18	logistic	711987	27897	684090	2	0	0	0.497528	0.480588	na	LDL,TC,nonHDL
Red_blood_cell_erythrocyte_distribution_width	Blood Biomarkers	rs2519093	9	136141870	C	-0.0237333	0.976546	0.0027481	5.81006e-18	linear	533455	NA	NA	2	0	0	0.192983	0.660446	na	HDL,TC,nonHDL
Glucose	Blood Biomarkers	rs11711206	3	170732945	A	0.0414438	1.04231	0.00480143	6.05268e-18	linear	361996	NA	NA	2	0	0	0.158487	0.690554	SLC2A2	nonHDL
LDL_cor	Blood Biomarkers	rs56322906	19	11346155	A	-0.0460789	0.954967	0.00533853	6.06138e-18	linear	493695	NA	NA	2	0.659895	90.4346	10.4543	0.00122363	LDLR	HDL
LDL_cor	Blood Biomarkers	rs12445804	16	11706100	G	-0.0324006	0.968119	0.00375412	6.09874e-18	linear	488963	NA	NA	2	0.0284587	38.4774	1.62542	0.202338	na	LDL,TC,nonHDL
HDL_cholesterol	Blood Biomarkers	rs4946955	6	109639710	G	-0.00782099	0.99221	0.000906352	6.18467e-18	linear	500125	NA	NA	2	0.000936852	53.7026	2.15995	0.141649	na	HDL
Myocardial infarction	circulatory system	rs73015024	19	11197598	T	-0.0938407	0.910428	0.0108771	6.27714e-18	logistic	712293	48713	663580	2	0	0	0.872146	0.350362	LDLR	LDL,TC,nonHDL
Atherosclerosis of the extremities	circulatory system	rs10455872	6	161010118	A	-0.224462	0.798946	0.0260215	6.35222e-18	logistic	712628	9746	702882	2	0.000403274	15.0029	1.17651	0.278068	PLG	LDL,nonHDL
Eosinophill_percentage	Blood Biomarkers	rs113360274	6	29850784	A	0.0455164	1.04657	0.00527677	6.36416e-18	linear	540590	NA	NA	2	0.0104819	55.1751	2.2309	0.135275	HLA-A	nonHDL
Glucose	Blood Biomarkers	rs10513688	3	170727218	G	0.0414178	1.04229	0.0048019	6.39215e-18	linear	362050	NA	NA	2	0	0	0.185357	0.666809	SLC2A2	TC
Cholelithiasis with acute cholecystitis	digestive	rs4245791	2	44074431	T	0.202042	1.2239	0.0234384	6.68935e-18	logistic	712628	4532	708096	2	0.00228278	67.366	3.06429	0.08003	ABCG5	LDL,TC,logTG,nonHDL
Splenomegaly	digestive	rs3184504	12	111884608	T	0.181824	1.1994	0.0211017	6.90092e-18	logistic	712628	4563	708065	2	0	0	0.0688159	0.793069	ALDH2	HDL
Hypothyroidism NOS	endocrine/metabolic	rs7933222	11	95298828	A	0.0637661	1.06584	0.00740143	6.97156e-18	logistic	704931	65592	639339	2	0.00144375	92.3094	13.003	0.000310999	na	TC
Sicca syndrome	dermatologic	rs1264377	6	30764907	A	0.315377	1.37078	0.0366066	6.97631e-18	logistic	712628	2242	710386	2	0.0295089	91.5534	11.8391	0.000580008	na	HDL
Myocardial infarction	circulatory system	rs7412	19	45412079	T	-0.111664	0.894345	0.0129615	6.99168e-18	logistic	712628	48726	663902	2	0.00221341	85.1859	6.75032	0.00937309	APOE	LDL,TC,nonHDL
Mean_corpuscular_haemoglobin_concentration	Blood Biomarkers	rs964184	11	116648917	G	0.0299216	1.03037	0.00347331	7.01092e-18	linear	548236	NA	NA	2	0	0	0.86932	0.351144	APOA1	HDL,LDL,TC,logTG,nonHDL
Essential hypertension	circulatory system	rs11187838	10	96038686	A	-0.0351576	0.965453	0.00408128	7.03354e-18	logistic	712097	341304	370793	2	0	0	0.000447338	0.983126	na	nonHDL
Mean_corpuscular_volume	Blood Biomarkers	rs140820592	16	31021880	G	-0.0883837	0.91541	0.0102631	7.1911e-18	linear	533848	NA	NA	2	0	0	0.683604	0.408348	na	LDL
TC_cor	Blood Biomarkers	rs2090034	2	20372409	A	-0.0313579	0.969129	0.00364287	7.43427e-18	linear	492769	NA	NA	2	0.211153	93.3423	15.0202	0.000106367	SDC1	HDL
TC_cor	Blood Biomarkers	rs1107850	2	20371772	A	-0.0313583	0.969128	0.00364387	7.58074e-18	linear	492621	NA	NA	2	0.204851	93.162	14.6243	0.000131215	SDC1	logTG
Haemoglobin_concentration	Blood Biomarkers	rs6458869	6	52630269	A	0.0198802	1.02008	0.00231012	7.58324e-18	linear	549844	NA	NA	2	0	0	0.864877	0.352377	na	logTG
Abdominal hernia	digestive	rs2820441	1	219734960	C	0.0568658	1.05851	0.00660837	7.62431e-18	logistic	712628	59513	653115	2	0.0014386	90.5241	10.5531	0.00115996	na	logTG
Hyperlipidemia	endocrine/metabolic	rs2972145	2	227101309	C	0.0408096	1.04165	0.00474264	7.6426e-18	logistic	712313	280235	432078	2	0.000107019	70.296	3.36655	0.0665331	IRS1	HDL
Total_bilirubin	Blood Biomarkers	rs1800961	20	43042364	T	0.237064	1.26752	0.0275544	7.73209e-18	linear	540620	NA	NA	2	0	0	0.790271	0.374018	HNF4A	HDL,LDL,TC,nonHDL
Lymphocyte_percentage	Blood Biomarkers	rs857725	1	158607935	T	-0.157361	0.854396	0.0182964	7.928e-18	linear	528555	NA	NA	2	0.000609902	7.59223	1.08216	0.298215	SPTA1	TC
Essential hypertension	circulatory system	rs2921064	8	8316637	T	0.0356658	1.03631	0.00414876	8.20101e-18	logistic	704059	339066	364993	2	0	0	2.96883e-06	0.998625	na	logTG
Haemoglobin_concentration	Blood Biomarkers	rs11407151	6	130367863	T	-0.0202037	0.979999	0.00235051	8.29503e-18	linear	550459	NA	NA	2	0	0	0.341538	0.558943	na	LDL
Type 2 diabetes with ophthalmic manifestations	endocrine/metabolic	rs76895963	12	4384844	G	-0.434863	0.647354	0.0505958	8.3381e-18	logistic	700356	27831	672525	2	0.0129641	42.2871	1.73272	0.188064	na	LDL,TC,logTG,nonHDL
Hyperlipidemia	endocrine/metabolic	rs2524143	6	31263510	T	-0.0432743	0.957649	0.00503518	8.37056e-18	logistic	711244	280065	431179	2	0	0	0.129234	0.719228	APOM	TC
Red_blood_cell_erythrocyte_distribution_width	Blood Biomarkers	rs507666	9	136149399	G	-0.0235994	0.976677	0.00274598	8.38599e-18	linear	533750	NA	NA	2	0	0	0.182445	0.66928	na	LDL
HDL_cholesterol	Blood Biomarkers	rs145464906	19	11350874	T	0.166039	1.18062	0.0193213	8.42941e-18	linear	509923	NA	NA	2	2.83198	92.7704	13.832	0.0001999	na	logTG
Essential hypertension	circulatory system	rs35895680	17	47060322	C	0.0381504	1.03889	0.00443945	8.43682e-18	logistic	703562	338887	364675	2	0.000413113	90.7739	10.8388	0.000993966	na	HDL
Mean_corpuscular_haemoglobin	Blood Biomarkers	rs6120890	20	30207659	T	-0.0477718	0.953351	0.0055607	8.62385e-18	linear	548672	NA	NA	2	0	0	0.426069	0.513924	na	HDL
BMI	Physical Measures	rs684773	3	135956305	A	-0.0968814	0.907664	0.0112774	8.64015e-18	linear	563664	NA	NA	2	0	0	0.00410798	0.948896	STAG1	logTG
Haemoglobin_concentration	Blood Biomarkers	rs2070895	15	58723939	G	0.0229693	1.02324	0.00267383	8.66476e-18	linear	549804	NA	NA	2	0.0260801	68.2919	3.15377	0.0757516	LIPC	TC
BMI	Physical Measures	rs3850986	15	73091283	G	-0.0850159	0.918498	0.00990023	8.90635e-18	linear	560661	NA	NA	2	0	0	0.128322	0.720178	na	logTG
CRP	Blood Biomarkers	rs1800961	20	43042364	T	-0.237815	0.788348	0.0276958	8.95144e-18	linear	414734	NA	NA	2	0	0	0.165302	0.684321	HNF4A	HDL,LDL,TC,nonHDL
Haematocrit_percentage	Blood Biomarkers	rs2219143	9	2622278	A	0.0604833	1.06235	0.00704451	9.01435e-18	linear	508082	NA	NA	2	0	0	0.0193506	0.889366	na	logTG
HbA1c	Blood Biomarkers	rs1264347	6	30798697	T	0.172374	1.18812	0.0200791	9.10308e-18	linear	487513	NA	NA	2	0.00742022	73.6748	3.79864	0.0512943	na	logTG
Hyperlipidemia	endocrine/metabolic	rs2138157	2	227103717	A	-0.0408109	0.960011	0.00475421	9.14985e-18	logistic	711576	280129	431447	2	0.000103055	69.4027	3.26826	0.0706326	IRS1	nonHDL
Type 2 diabetes with ophthalmic manifestations	endocrine/metabolic	rs864745	7	28180556	C	-0.0761916	0.926639	0.00887604	9.16673e-18	logistic	712628	27899	684729	2	0.00196074	79.7225	4.93158	0.0263703	na	logTG
Albumin	Blood Biomarkers	rs2820468	1	219673705	A	-0.0547222	0.946748	0.00637643	9.32804e-18	linear	503824	NA	NA	2	0	0	0.0570322	0.81125	na	nonHDL
Haemoglobin_concentration	Blood Biomarkers	rs8119374	20	56118666	T	-0.0193133	0.980872	0.0022506	9.37388e-18	linear	550885	NA	NA	2	0	0	0.695077	0.404443	PCK1	logTG
Type 2 diabetes	endocrine/metabolic	rs2252867	2	65296280	C	-0.0414728	0.959375	0.00483408	9.54924e-18	logistic	712439	136876	575563	2	1.66197e-05	22.0641	1.28311	0.257323	SPRED2	logTG
Haematocrit_percentage	Blood Biomarkers	rs913499	6	37038432	G	-0.0558088	0.94572	0.00650518	9.55988e-18	linear	549554	NA	NA	2	0.00369323	31.2554	1.45466	0.227782	na	TC
Neutrophill_percentage	Blood Biomarkers	rs6689	6	32627700	A	0.20495	1.22746	0.0238918	9.63202e-18	linear	515878	NA	NA	2	0.00300779	20.1257	1.25197	0.263177	BRD2	nonHDL
LDL_cor	Blood Biomarkers	rs34514836	19	46385438	C	-0.0256403	0.974686	0.00298899	9.63385e-18	linear	493082	NA	NA	2	0.150502	85.5832	6.93635	0.00844611	na	HDL
Mean_corpuscular_volume	Blood Biomarkers	rs2516079	12	120859188	T	-0.0942691	0.910038	0.0109934	9.90465e-18	linear	535040	NA	NA	2	0.017304	65.9502	2.93688	0.086578	ACADS	TC
Type 2 diabetes with ophthalmic manifestations	endocrine/metabolic	rs13389219	2	165528876	T	-0.0784343	0.924563	0.00914912	1.00926e-17	logistic	712468	27897	684571	2	0	0	0.297638	0.585367	na	logTG
Haemoglobin_concentration	Blood Biomarkers	rs913499	6	37038432	G	-0.0189736	0.981205	0.00221339	1.01524e-17	linear	549548	NA	NA	2	0.000739795	8.05849	1.08765	0.296993	na	TC
Triglycerides	Blood Biomarkers	rs2000999	16	72108093	G	-0.0247989	0.975506	0.00289365	1.03368e-17	linear	542544	NA	NA	2	0.00410546	78.9679	4.75463	0.0292196	na	logTG
TC_cor	Blood Biomarkers	rs3822855	6	116316882	G	-0.0317276	0.96877	0.00370302	1.05271e-17	linear	493882	NA	NA	2	0.0224834	59.5677	2.47327	0.115797	na	TC
Varicose veins	circulatory system	rs7734927	5	127453735	T	0.104534	1.11019	0.0122033	1.07065e-17	logistic	711992	18187	693805	2	0.00390176	89.9181	9.91878	0.00163601	SLC12A2	logTG
Triglycerides	Blood Biomarkers	rs79287178	3	172294500	G	-0.0621435	0.939748	0.00725488	1.07371e-17	linear	533918	NA	NA	2	0.0352467	80.272	5.06893	0.0243584	na	logTG
Lymphocyte_percentage	Blood Biomarkers	rs28577594	12	123895906	G	0.156022	1.16885	0.0182172	1.0849e-17	linear	526445	NA	NA	2	0	0	0.473974	0.491165	PITPNM2	logTG
Thyrotoxicosis with or without goiter	endocrine/metabolic	rs2524143	6	31263510	T	0.145937	1.15712	0.0170482	1.12615e-17	logistic	711244	8537	702707	2	0.0135442	95.6784	23.1396	1.50655e-06	APOM	TC
Essential hypertension	circulatory system	rs57866767	10	96023077	C	-0.0350951	0.965514	0.00410071	1.14557e-17	logistic	712032	341290	370742	2	0	0	0.00209648	0.96348	CYP2C18	TC
Red_blood_cell_erythrocyte_count	Blood Biomarkers	rs342467	4	88052219	T	0.0069133	1.00694	0.000807818	1.14851e-17	linear	549854	NA	NA	2	0.00211581	22.4835	1.29005	0.256039	AFF1	LDL
Hyperlipidemia	endocrine/metabolic	rs6029549	20	39754695	C	-0.0388108	0.961933	0.00453615	1.16962e-17	logistic	711932	280172	431760	2	3.95528e-05	48.8888	1.95652	0.161886	PLCG1	LDL,nonHDL
Essential hypertension	circulatory system	rs3891783	10	96015793	G	-0.0350519	0.965555	0.00410133	1.26909e-17	logistic	712025	341289	370736	2	0	0	0.000532939	0.981582	HELLS	logTG
Red_blood_cell_erythrocyte_count	Blood Biomarkers	rs342469	4	88050554	A	-0.00690344	0.99312	0.000807776	1.2718e-17	linear	549916	NA	NA	2	0.00180864	19.8821	1.24816	0.263904	AFF1	HDL
Hyperlipidemia	endocrine/metabolic	rs6029552	20	39760448	C	-0.038757	0.961984	0.00453606	1.29433e-17	logistic	711980	280174	431806	2	3.8566e-05	48.2587	1.93269	0.164464	PLCG1	TC
Neutrophill_percentage	Blood Biomarkers	rs17617028	4	106064683	G	0.197442	1.21828	0.0231112	1.30635e-17	linear	516421	NA	NA	2	0.0302906	77.3518	4.41536	0.0356167	TET2	LDL
HDL_cholesterol	Blood Biomarkers	rs142449754	6	41986427	T	-0.00821142	0.991822	0.000961311	1.32042e-17	linear	508941	NA	NA	2	0	0	0.0472217	0.82797	na	HDL
Mean_platelet_thrombocyte_volume	Blood Biomarkers	rs636523	1	62920008	G	-0.0216193	0.978613	0.00253164	1.34622e-17	linear	532846	NA	NA	2	0.0421655	82.8429	5.8285	0.0157686	ANGPTL3	LDL,logTG,nonHDL
Alanine_aminotransferase	Blood Biomarkers	rs67890964	16	83979317	C	-0.250439	0.778459	0.0293428	1.40234e-17	linear	543129	NA	NA	2	0.0493802	93.8052	16.1426	5.87462e-05	na	LDL,TC,nonHDL
Red_blood_cell_erythrocyte_count	Blood Biomarkers	rs8065527	17	45024027	G	-0.0070724	0.992953	0.000828889	1.4336e-17	linear	549397	NA	NA	2	0.0292146	79.1658	4.79979	0.0284631	MYL4	HDL
Mean_corpuscular_volume	Blood Biomarkers	rs622871	6	31878495	A	0.0898998	1.09406	0.010537	1.44016e-17	linear	542456	NA	NA	2	0	0	0.165058	0.684542	APOM	logTG
Mean_corpuscular_haemoglobin	Blood Biomarkers	rs3747207	22	44324855	A	0.0420107	1.04291	0.00492452	1.45179e-17	linear	549958	NA	NA	2	0	0	0.473045	0.491589	na	LDL,nonHDL
Obesity	endocrine/metabolic	rs9844949	3	185820283	A	-0.0579955	0.943654	0.00679977	1.47571e-17	logistic	710984	153574	557410	2	0.000886425	87.7322	8.15143	0.00430271	na	TC
Triglycerides	Blood Biomarkers	rs6499240	16	69686912	A	-0.0197303	0.980463	0.00231393	1.5051e-17	linear	539179	NA	NA	2	0.0113647	93.4162	15.1889	9.72729e-05	NFAT5	logTG
Haematocrit_percentage	Blood Biomarkers	rs1292072	17	57925649	A	0.0674805	1.06981	0.00791579	1.53088e-17	linear	550274	NA	NA	2	0.0139006	53.2207	2.1377	0.143717	RPS6KB1	logTG
Type 2 diabetes	endocrine/metabolic	rs17770336	9	28414625	C	-0.0427595	0.958142	0.00501611	1.53564e-17	logistic	712485	136884	575601	2	5.44912e-05	46.926	1.88416	0.169862	na	logTG
HDL_cholesterol	Blood Biomarkers	rs4820325	22	38599978	G	0.00712666	1.00715	0.000836054	1.53917e-17	linear	509325	NA	NA	2	0.00225985	75.3548	4.05759	0.0439733	DDX17	logTG
Red_blood_cell_erythrocyte_count	Blood Biomarkers	rs342466	4	88053085	C	0.0068866	1.00691	0.000807917	1.54274e-17	linear	549836	NA	NA	2	0.00378389	34.0913	1.51725	0.218036	AFF1	logTG
Hyperlipidemia	endocrine/metabolic	rs3128759	6	31885930	C	-0.0399424	0.960845	0.00468724	1.57482e-17	logistic	711035	280017	431018	2	0	0	0.323471	0.569529	APOM	LDL,TC,nonHDL
Other non-epithelial cancer of skin	neoplasms	rs72992015	1	150842696	C	-0.069962	0.932429	0.00821163	1.59732e-17	logistic	708847	60020	648827	2	0	0	0.143314	0.705009	ARNT	HDL
Type 2 diabetes	endocrine/metabolic	rs2519093	9	136141870	C	-0.049914	0.951311	0.00585887	1.60406e-17	logistic	712322	136867	575455	2	0	0	0.0329158	0.856032	na	HDL,TC,nonHDL
Red_blood_cell_erythrocyte_count	Blood Biomarkers	rs77303550	16	72079657	T	-0.00853041	0.991506	0.00100132	1.60746e-17	linear	549117	NA	NA	2	0.000209796	1.68605	1.01715	0.313196	AP1G1	LDL,TC
TC_cor	Blood Biomarkers	rs1538385	6	116327493	A	-0.0315125	0.968979	0.00369928	1.61579e-17	linear	494576	NA	NA	2	0.0262262	63.0859	2.70899	0.0997841	TSPYL1	HDL
Hypothyroidism NOS	endocrine/metabolic	rs76428106	13	28604007	C	0.276364	1.31833	0.0324479	1.63501e-17	logistic	709265	65805	643460	2	0.00865381	80.0364	5.00913	0.025214	na	TC
Urinary calculus	genitourinary	rs4976677	5	176629546	A	-0.106954	0.898567	0.0125593	1.65246e-17	logistic	712388	17537	694851	2	0.000110049	25.843	1.34849	0.245542	LMAN2	logTG
Mean_corpuscular_volume	Blood Biomarkers	rs2248162	6	29915061	T	0.0861342	1.08995	0.0101169	1.68217e-17	linear	550611	NA	NA	2	0	0	0.0375607	0.846328	GABBR1	HDL
Sarcoidosis	dermatologic	rs35282906	6	32657201	T	0.526207	1.6925	0.0618078	1.68616e-17	logistic	712598	1961	710637	2	0.0113632	57.8292	2.37131	0.123584	BRD2	LDL
Mean_corpuscular_haemoglobin	Blood Biomarkers	rs2248162	6	29915061	T	0.0358163	1.03647	0.00420745	1.70082e-17	linear	550633	NA	NA	2	0	0	0.0804799	0.776648	GABBR1	HDL
Haematocrit_percentage	Blood Biomarkers	rs1292066	17	57932314	A	-0.0672361	0.934974	0.00790512	1.80992e-17	linear	550562	NA	NA	2	0.0179909	59.7655	2.48543	0.114905	RPS6KB1	HDL
Abnormal results of function study of liver	digestive	rs1260326	2	27730940	C	0.0674781	1.06981	0.00793395	1.81617e-17	logistic	712628	36058	676570	2	0.00107485	84.1283	6.30051	0.0120703	na	HDL,LDL,TC,logTG,nonHDL
Alanine_aminotransferase	Blood Biomarkers	rs8073510	17	65839210	A	-0.303764	0.738035	0.0357233	1.84341e-17	linear	543450	NA	NA	2	0.0344812	87.9682	8.31133	0.00393986	BPTF	LDL,TC,nonHDL
Haematocrit_percentage	Blood Biomarkers	rs11380614	6	37037818	TA	-0.0553175	0.946185	0.0065079	1.89501e-17	linear	548915	NA	NA	2	0.0070117	46.48	1.86846	0.171651	na	LDL
Albumin	Blood Biomarkers	rs140444852	3	47955346	G	0.212385	1.23662	0.0249925	1.9297e-17	linear	505079	NA	NA	2	0	0	0.927159	0.335602	na	TC
Haemoglobin_concentration	Blood Biomarkers	rs1077835	15	58723426	A	0.0227402	1.023	0.00267633	1.9491e-17	linear	549085	NA	NA	2	0.0300109	71.227	3.47548	0.0622846	LIPC	logTG,nonHDL
Red_blood_cell_erythrocyte_count	Blood Biomarkers	rs197923	17	45008742	G	-0.0070318	0.992993	0.000827689	1.96747e-17	linear	550631	NA	NA	2	0.0250409	76.7005	4.29194	0.0382935	GOSR2	TC
Albumin	Blood Biomarkers	rs11217133	11	118928249	A	0.0528699	1.05429	0.00622333	1.972e-17	linear	503670	NA	NA	2	0.00519397	58.7223	2.42262	0.119595	na	HDL
Essential hypertension	circulatory system	rs7459547	8	11854888	G	0.0346008	1.03521	0.00407395	2.01045e-17	logistic	707682	340071	367611	2	1.91287e-06	5.20424	1.0549	0.304381	na	HDL
TC_cor	Blood Biomarkers	rs907866	2	20371380	A	-0.0311419	0.969338	0.00366763	2.04829e-17	linear	490451	NA	NA	2	0.192419	92.5603	13.4414	0.000246134	SDC1	TC,nonHDL
Lymphocyte_percentage	Blood Biomarkers	rs1938498	1	66098653	T	-0.142283	0.867376	0.0167596	2.07327e-17	linear	528489	NA	NA	2	0	0	0.543105	0.461149	LEPR	HDL
Alanine_aminotransferase	Blood Biomarkers	rs8071463	17	65938655	G	0.303159	1.35413	0.0357466	2.23664e-17	linear	542979	NA	NA	2	0.0475846	90.9031	10.9928	0.000914687	BPTF	HDL
Triglycerides	Blood Biomarkers	rs2540949	2	65284231	A	0.0198547	1.02005	0.00234155	2.26547e-17	linear	541277	NA	NA	2	0.00473221	86.1972	7.24493	0.00711016	na	HDL
Alanine_aminotransferase	Blood Biomarkers	rs3812316	7	73020337	G	0.358802	1.43161	0.0423165	2.27081e-17	linear	543580	NA	NA	2	0.0935562	93.2509	14.8167	0.000118479	MLXIPL	logTG
LDL_cor	Blood Biomarkers	rs36086195	1	16510894	C	-0.0166155	0.983522	0.00195987	2.2946e-17	linear	493093	NA	NA	2	0.0051465	31.2909	1.45541	0.227661	na	LDL,TC,nonHDL
Total_bilirubin	Blood Biomarkers	rs600626	11	75455309	G	0.112161	1.11869	0.0132304	2.30078e-17	linear	540587	NA	NA	2	0	0	0.398799	0.52771	na	HDL
Hyperlipidemia	endocrine/metabolic	rs2203452	2	227094758	A	-0.0402132	0.960585	0.00474449	2.33524e-17	logistic	712522	280258	432264	2	9.46984e-05	67.6649	3.09262	0.0786481	na	logTG
Coronary atherosclerosis	circulatory system	rs2873195	17	2064702	T	0.0457223	1.04678	0.00539567	2.37319e-17	logistic	706928	122896	584032	2	0.000611501	89.8465	9.84887	0.00169936	SMG6	HDL
Haemoglobin_concentration	Blood Biomarkers	rs115383270	1	161531340	G	-0.0372826	0.963404	0.00440229	2.47699e-17	linear	542572	NA	NA	2	0.0228775	38.154	1.61692	0.203522	na	LDL,TC
Eosinophill_percentage	Blood Biomarkers	rs1264377	6	30764907	A	-0.0452268	0.955781	0.00534265	2.55637e-17	linear	541036	NA	NA	2	0.00770338	45.7269	1.84253	0.174655	na	HDL
Edema	symptoms	rs2519093	9	136141870	C	-0.0651386	0.936938	0.00769601	2.5847e-17	logistic	712322	67568	644754	2	0.000471572	53.8053	2.16475	0.141207	na	HDL,TC,nonHDL
Aspartate_aminotransferase	Blood Biomarkers	rs2980888	8	126507308	T	0.206773	1.2297	0.0244328	2.60737e-17	linear	538478	NA	NA	2	0.00258716	42.7369	1.74632	0.186339	TRIB1	HDL
Red_blood_cell_erythrocyte_count	Blood Biomarkers	rs855791	22	37462936	G	-0.00678926	0.993234	0.000802262	2.61387e-17	linear	542400	NA	NA	2	0.00499099	42.4851	1.73868	0.187306	na	LDL
LDL_cor	Blood Biomarkers	rs117139027	8	29024943	A	-0.0627159	0.93921	0.00741155	2.63046e-17	linear	494153	NA	NA	2	0.661715	81.1639	5.30896	0.0212161	na	LDL,TC,nonHDL
Haemoglobin_concentration	Blood Biomarkers	rs11380614	6	37037818	TA	-0.0187335	0.981441	0.00221452	2.68758e-17	linear	548909	NA	NA	2	0.00382558	31.3199	1.45603	0.227563	na	LDL
Type 2 diabetes	endocrine/metabolic	rs507666	9	136149399	G	-0.0495166	0.951689	0.00585389	2.70251e-17	logistic	712628	136891	575737	2	0	0	0.0414434	0.838684	na	LDL
Haemoglobin_concentration	Blood Biomarkers	rs9388766	6	130354855	T	-0.0203392	0.979866	0.00240472	2.71941e-17	linear	549352	NA	NA	2	0	0	0.282281	0.59521	na	logTG
Coronary atherosclerosis	circulatory system	rs4245791	2	44074431	T	-0.0440131	0.956941	0.00520518	2.77594e-17	logistic	712628	123318	589310	2	0.00012242	65.5043	2.89891	0.0886393	ABCG5	LDL,TC,logTG,nonHDL
Cancer of prostate	neoplasms	rs360804	2	62939397	A	-0.0677599	0.934485	0.00801569	2.82924e-17	logistic	708333	45105	663228	2	5.76919e-05	28.9311	1.40708	0.235541	na	LDL
Mean_corpuscular_volume	Blood Biomarkers	rs3862948	1	205099959	A	-0.0977151	0.906907	0.0115638	2.91109e-17	linear	550198	NA	NA	2	0.00262621	20.4121	1.25647	0.26232	na	HDL
Neutrophill_count	Blood Biomarkers	rs137859889	5	141542219	G	0.0297343	1.03018	0.00351902	2.92305e-17	linear	514199	NA	NA	2	0	0	0.00991819	0.92067	na	HDL
Aspartate_aminotransferase	Blood Biomarkers	rs9844432	3	58391293	G	-0.343072	0.709587	0.0406121	2.9753e-17	linear	538294	NA	NA	2	0	0	0.000171991	0.989536	na	LDL,TC,nonHDL
Cholelithiasis	digestive	rs11878908	19	49227443	C	-0.067564	0.934668	0.00800318	3.11596e-17	logistic	711812	33586	678226	2	0.000639329	83.0851	5.91194	0.0150386	NUCB1	TC
Cancer of prostate	neoplasms	rs189671	2	62959308	A	-0.0672883	0.934926	0.0079706	3.11786e-17	logistic	709375	45132	664243	2	1.04478e-06	0.74025	1.00746	0.315513	na	nonHDL
Thyrotoxicosis with or without goiter	endocrine/metabolic	rs1264377	6	30764907	A	0.166674	1.18137	0.019744	3.12627e-17	logistic	712628	8545	704083	2	0.0155877	95.0352	20.1416	7.19135e-06	na	HDL
LDL_cor	Blood Biomarkers	rs7157399	14	70846954	T	-0.0236495	0.976628	0.0028021	3.17589e-17	linear	493247	NA	NA	2	0	0	0.914363	0.338959	COX16	nonHDL
Congestive heart failure (CHF) NOS	circulatory system	rs56094641	16	53806453	G	0.0672792	1.06959	0.00797647	3.3204e-17	logistic	712424	37915	674509	2	0	0	0.0428484	0.836011	na	HDL
HDL_cholesterol	Blood Biomarkers	rs13101828	4	965720	A	-0.00700669	0.993018	0.000830868	3.36977e-17	linear	505404	NA	NA	2	0	0	0.180671	0.670797	na	HDL,nonHDL
Red_blood_cell_erythrocyte_count	Blood Biomarkers	rs3128759	6	31885930	C	-0.00682182	0.993201	0.000809041	3.39852e-17	linear	549136	NA	NA	2	0	0	0.0207046	0.885586	APOM	LDL,TC,nonHDL
HDL_cholesterol	Blood Biomarkers	rs17149279	8	9195638	T	0.00832619	1.00836	0.000987606	3.43661e-17	linear	505424	NA	NA	2	0	0	0.0703289	0.790858	TNKS	logTG
LDL_cor	Blood Biomarkers	rs2008998	17	29413614	G	-0.0177502	0.982406	0.00210565	3.46316e-17	linear	493237	NA	NA	2	0.356287	94.3631	17.7401	2.53231e-05	NF1	LDL,TC
Triglycerides	Blood Biomarkers	rs1045242	5	118729327	G	-0.0216848	0.978549	0.00257242	3.46491e-17	linear	537121	NA	NA	2	0.00134272	58.713	2.42207	0.119637	na	HDL,logTG
Neutrophill_percentage	Blood Biomarkers	rs4449583	5	1284135	T	0.168417	1.18343	0.0199795	3.47186e-17	linear	510101	NA	NA	2	0	0	0.00212492	0.963233	na	HDL
Albumin	Blood Biomarkers	rs11172134	12	57645789	A	-0.0637572	0.938233	0.00756563	3.53965e-17	linear	501399	NA	NA	2	0	0	0.0702844	0.790923	na	LDL
Type 2 diabetes	endocrine/metabolic	rs1412234	9	28410683	C	0.0428494	1.04378	0.0050849	3.55289e-17	logistic	708784	136651	572133	2	3.54862e-05	36.2603	1.56888	0.210369	na	HDL
LDL_cor	Blood Biomarkers	rs6573960	14	70857022	C	-0.023563	0.976712	0.00279644	3.57484e-17	linear	494030	NA	NA	2	0	0	0.916237	0.338465	na	LDL
Alanine_aminotransferase	Blood Biomarkers	rs7638903	3	12383714	A	-0.364377	0.694629	0.0432491	3.60501e-17	linear	543008	NA	NA	2	0.0359995	84.1877	6.32419	0.0119102	PPARG	logTG
Triglycerides	Blood Biomarkers	rs28471687	8	72459582	G	0.035431	1.03607	0.00420608	3.64559e-17	linear	542117	NA	NA	2	0	0	0.177633	0.673415	na	HDL
Edema	symptoms	rs507666	9	136149399	G	-0.0647734	0.93728	0.00768964	3.65513e-17	logistic	712628	67571	645057	2	0.000371604	47.8576	1.91782	0.166097	na	LDL
Mean_platelet_thrombocyte_volume	Blood Biomarkers	rs3850634	1	63050598	G	-0.0212968	0.978928	0.00252846	3.67523e-17	linear	533416	NA	NA	2	0.0242598	75.3908	4.06352	0.0438192	ANGPTL3	HDL
Triglycerides	Blood Biomarkers	rs1534696	7	26397239	C	0.0191294	1.01931	0.00227153	3.72082e-17	linear	542544	NA	NA	2	0.00139202	62.9438	2.69861	0.100436	CBX3	HDL
Hematuria	genitourinary	rs2248162	6	29915061	T	-0.0582575	0.943407	0.00692013	3.8116e-17	logistic	712438	52329	660109	2	0.00054083	84.3036	6.37088	0.0116008	GABBR1	HDL
Mean_corpuscular_haemoglobin	Blood Biomarkers	rs2291428	10	45958856	G	-0.0397736	0.961007	0.00472492	3.83519e-17	linear	548426	NA	NA	2	0	0	0.361969	0.547415	na	TC
Mean_corpuscular_haemoglobin_concentration	Blood Biomarkers	rs34054295	19	4478062	G	0.0204828	1.02069	0.00243358	3.87187e-17	linear	546416	NA	NA	2	0	0	0.0173245	0.895283	na	LDL,TC,nonHDL
HDL_cholesterol	Blood Biomarkers	rs2800708	6	127437617	T	-0.00695601	0.993068	0.000826476	3.87994e-17	linear	508539	NA	NA	2	0.00275261	78.8635	4.73115	0.0296211	na	HDL
HDL_cholesterol	Blood Biomarkers	rs3775228	4	87985166	C	0.00712152	1.00715	0.000846211	3.90316e-17	linear	504764	NA	NA	2	0	0	0.000740835	0.978286	HSD17B11	nonHDL
Thyrotoxicosis with or without goiter	endocrine/metabolic	rs1233393	6	29549653	G	0.196673	1.21735	0.0233697	3.90498e-17	logistic	712468	8542	703926	2	0.0201673	94.8017	19.2371	1.15448e-05	na	logTG
Mean_platelet_thrombocyte_volume	Blood Biomarkers	rs55775305	1	2975119	G	0.0266793	1.02704	0.00317034	3.91973e-17	linear	531983	NA	NA	2	0.00288387	17.478	1.2118	0.270976	PRDM16	HDL
Mean_platelet_thrombocyte_volume	Blood Biomarkers	rs995000	1	63107526	T	-0.0212822	0.978943	0.00252907	3.92747e-17	linear	533397	NA	NA	2	0.0207203	72.9954	3.70307	0.0543125	ANGPTL3	TC
Other chronic ischemic heart disease, unspecified	circulatory system	rs2980888	8	126507308	T	0.0500086	1.05128	0.00594477	4.02395e-17	logistic	712299	88670	623629	2	0	0	0.0241915	0.876399	TRIB1	HDL
Lymphocyte_percentage	Blood Biomarkers	rs507666	9	136149399	G	-0.175359	0.839156	0.0208494	4.07355e-17	linear	528555	NA	NA	2	0.0180639	66.1526	2.95443	0.0856423	na	LDL
HDL_cholesterol	Blood Biomarkers	rs1801253	10	115805056	C	0.00795145	1.00798	0.000945559	4.12601e-17	linear	504120	NA	NA	2	0	0	0.0692295	0.792462	na	logTG
Urea	Blood Biomarkers	rs2749013	6	52627165	A	-0.0266799	0.973673	0.0031737	4.22219e-17	linear	543460	NA	NA	2	0	0	0.972903	0.323957	GSTA1	HDL
BMI	Physical Measures	rs77910749	6	98566506	CT	0.0779703	1.08109	0.00927734	4.30101e-17	linear	563325	NA	NA	2	0	0	0.0992983	0.752673	na	HDL
LDL_cor	Blood Biomarkers	rs6054	4	155489608	C	-0.113671	0.892551	0.0135256	4.31004e-17	linear	493252	NA	NA	2	1.33662	52.3782	2.09988	0.147311	FGB	LDL,TC,logTG,nonHDL
TC_cor	Blood Biomarkers	rs12603290	17	45650196	C	-0.0305698	0.969893	0.00363762	4.32324e-17	linear	492874	NA	NA	2	0.0704375	77.378	4.42048	0.03551	KPNB1	TC
LDL_cor	Blood Biomarkers	rs8022128	14	70847103	A	-0.0236319	0.976645	0.00281263	4.38651e-17	linear	493084	NA	NA	2	0	0	0.93982	0.332324	na	TC
Disorders of iron metabolism	hematopoietic	rs2844795	6	30073847	C	0.18631	1.2048	0.0221744	4.38912e-17	logistic	712628	4152	708476	2	0.0121443	90.4036	10.4206	0.0012462	na	TC
Cancer of prostate	neoplasms	rs78784525	2	62978981	T	-0.0674215	0.934801	0.00802598	4.4496e-17	logistic	708156	45096	663060	2	0	0	0.972929	0.323951	na	TC
HbA1c	Blood Biomarkers	rs13389219	2	165528876	T	-0.117706	0.888958	0.0140131	4.47745e-17	linear	504031	NA	NA	2	0.000565498	32.8416	1.48902	0.222369	na	logTG
HDL_cholesterol	Blood Biomarkers	rs17605615	4	87996745	G	0.00705544	1.00708	0.000840185	4.56131e-17	linear	509923	NA	NA	2	0	0	0.00222604	0.962369	HSD17B11	TC
Myocardial infarction	circulatory system	rs1412445	10	91002804	T	0.0609717	1.06287	0.00726134	4.58969e-17	logistic	711668	48690	662978	2	1.82945e-05	13.5744	1.15706	0.282075	LIPA	LDL
Lymphocyte_percentage	Blood Biomarkers	rs2519093	9	136141870	C	-0.175123	0.839354	0.0208595	4.64466e-17	linear	528260	NA	NA	2	0.0165133	64.0769	2.78373	0.0952264	na	HDL,TC,nonHDL
TC_cor	Blood Biomarkers	rs8077106	17	45653291	G	-0.0305357	0.969926	0.00363728	4.65088e-17	linear	492925	NA	NA	2	0.071008	77.5205	4.4485	0.034932	KPNB1	nonHDL
LDL_cor	Blood Biomarkers	rs17580	14	94847262	T	-0.0376738	0.963027	0.00448813	4.69421e-17	linear	494153	NA	NA	2	0.710562	91.5341	11.8121	0.000588481	SERPINA1	LDL,TC,nonHDL
Mean_corpuscular_haemoglobin_concentration	Blood Biomarkers	rs62551047	9	91434086	A	0.0416513	1.04253	0.00496387	4.82505e-17	linear	545772	NA	NA	2	0	0	0.003133	0.955363	na	LDL
Mean_corpuscular_haemoglobin	Blood Biomarkers	rs13398728	2	113842506	C	-0.0347519	0.965845	0.00414305	4.94542e-17	linear	550455	NA	NA	2	0	0	0.579555	0.446487	na	nonHDL
LDL_cor	Blood Biomarkers	rs115771255	3	132119691	T	-0.0271518	0.973213	0.00323759	5.01173e-17	linear	493070	NA	NA	2	0.269182	87.2065	7.81644	0.00517729	na	nonHDL
Albumin	Blood Biomarkers	rs59770119	1	219664627	A	0.0517688	1.05313	0.00617347	5.0428e-17	linear	498467	NA	NA	2	0	0	0.302015	0.582622	na	HDL
Seborrheic dermatitis	dermatologic	rs1264347	6	30798697	T	-0.101867	0.90315	0.0121558	5.28878e-17	logistic	695156	38498	656658	2	0.00642226	92.4206	13.1937	0.00028089	na	logTG
Albumin	Blood Biomarkers	rs2972145	2	227101309	C	0.0531186	1.05455	0.00633903	5.31052e-17	linear	505051	NA	NA	2	0.0243984	87.2556	7.84661	0.00509162	IRS1	HDL
BMI	Physical Measures	rs2921064	8	8316637	T	0.0790159	1.08222	0.00943388	5.48721e-17	linear	555221	NA	NA	2	0.000368912	58.4885	2.40897	0.120642	na	logTG
Calcium	Blood Biomarkers	rs72992015	1	150842696	C	-0.00228623	0.997716	0.000272966	5.49966e-17	linear	373626	NA	NA	2	0	0	0.723293	0.395066	ARNT	HDL
Mean_platelet_thrombocyte_volume	Blood Biomarkers	rs12878001	14	64239629	T	0.0277961	1.02819	0.00331881	5.50819e-17	linear	531160	NA	NA	2	0.0331723	72.7578	3.67078	0.0553743	na	logTG
Splenomegaly	digestive	rs653178	12	112007756	C	0.176627	1.19319	0.0210973	5.66365e-17	logistic	712628	4563	708065	2	0	0	0.0676116	0.794847	ALDH2	LDL,TC,nonHDL
[truncated: 3,913 more rows]
