# Supplementary material for: Implicating genes, pleiotropy, and sexual dimorphism at blood lipid loci through multi-ancestry meta-analysis
Source: Genome Biol. 2022 Dec 27;23:268. doi: 10.1186/s13059-022-02837-1 (PMC9793579; doi:10.1186/s13059-022-02837-1)
Supplement: Supplementary file 18 — Additional file 18: Table S10. Lambda GC values across minor allele frequency bins for sex-specific meta-analyses. [file 13059_2022_2837_MOESM18_ESM.xlsx]

## Sheet: Sheet1
Table S10. Lambda GC values across minor allele frequency bins for sex-specific meta-analyses
Common: MAF ≥ 5%, Low: 1% ≤ MAF < 5%, Rare: MAF < 1%
AUT		All	Common	Low	Rare
HDL	MALE	1.10727	1.22184	1.08756	1.03878
HDL	FEMALE	1.09096	1.18295	1.062	1.03761
LDL	MALE	1.06968	1.132	1.05655	1.02763
LDL	FEMALE	1.0676	1.11528	1.04722	1.03791
logTG	MALE	1.09111	1.19637	1.06678	1.02506
logTG	FEMALE	1.07538	1.15923	1.04972	1.02523
nonHDL	MALE	1.04635	1.08299	1.02874	1.0215
nonHDL	FEMALE	1.06201	1.10661	1.04085	1.03404
TC	MALE	1.07313	1.15749	1.05947	1.02197
TC	FEMALE	1.06549	1.12355	1.04852	1.03143
X		All	Common	Low	Rare
HDL	ALL	1.10183	1.2534	1.10434	1.07317
HDL	FEMALE	1.05003	1.10526	1.02821	1.03954
HDL	MALE	1.1044	1.24836	1.0931	1.04483
LDL	ALL	1.04205	1.04526	1.02626	1.04422
LDL	FEMALE	1.06421	1.06573	1.06869	1.0628
LDL	MALE	1.01042	1.03751	0.98703	1.00759
logTG	ALL	1.08612	1.20212	1.12138	1.05704
logTG	FEMALE	1.05693	1.07639	1.048	1.05338
logTG	MALE	1.07528	1.2138	1.05893	1.01595
nonHDL	ALL	1.04435	1.04598	1.02189	1.04787
nonHDL	FEMALE	1.06653	1.08871	1.05299	1.06184
nonHDL	MALE	0.996715	1.0011	0.989454	0.99697
TC	ALL	1.05151	1.07488	1.04496	1.04783
TC	FEMALE	1.05695	1.07209	1.05973	1.05233
TC	MALE	1.01842	1.04942	1.00263	1.00969
