# Supplementary material for: Implicating genes, pleiotropy, and sexual dimorphism at blood lipid loci through multi-ancestry meta-analysis
Source: Genome Biol. 2022 Dec 27;23:268. doi: 10.1186/s13059-022-02837-1 (PMC9793579; doi:10.1186/s13059-022-02837-1)
Supplement: Supplementary file 19 — Additional file 19: Table S11. Significant female-specific multi-ancestry meta-analysis results. [file 13059_2022_2837_MOESM19_ESM.xlsx]

## Sheet: Sheet1
Table S11. Significant female-specific multi-ancestry meta-analysis results
trait	chr	pos	interp_cM	rs_dbSNP147	EA	NEA	EAF	Nsample	Ncohort	neg_log10_pvalue_GC	pvalue_GC	SnpEff_ensembl_summary	ANNOVAR_refseq_Closest_gene(intergenic_only)	overlap	Metal Ref	Metal Alt	Freq1	FreqSE	Effect	StdErr	HetPVal	REF	ALT	conditional_BETA	conditional_log10P	variants_conditioned_on	ratio_actual_conditional_pvalue	ratio_actual_conditional_beta	independent	overlap_with_sex_combined	Sex-combined_Pvalue	neg_log10_sex_combined_pvalue	Male_Pvalue	neg_log10_male_pvalue	Sex_heterogeity_Pvalue
logTG	3	64718258	87.1776	rs2371767	C	G	0.289268	667142	288	8.34089	4.56e-09	ADAMTS9-AS2(4):intron_variant(4)	.|.	known	c	g	0.705	0.0874	0.0141	0.0021	0.6306	C	G	0.012	10.1035	3:135932359,3:12383714,3:170736708,3:52490391,3:150066540,3:172294500,3:24520283,3:142648844,3:49145304,3:156797941	0.943138	1.175	yes	no	6.27e-07	6.20273	0.171	0.767004	6.53e-05
TC	3	105480291	117.762	rs7644634	T	C	0.432733	759584	286	7.59514	2.54e-08	CBLB(359):intron_variant(5)	.	novel	t	c	0.5686	0.0978	0.0106	0.0018	0.004986	C	T	-0.00871	7.34104	3:12621075,3:122285218,3:132235344,3:58386274,3:32512038,3:123069058,3:119588051,3:142649110,3:160137748,3:12040065,3:69837571,3:170693472,3:24520283,3:142022265,3:129274814,3:50219991,3:136450593	1.15557	1.21699	yes	no	8.69e-08	7.06098	0.0497	1.30364	0.03561
HDL	4	57779567	75.6337	rs781658	A	G	0.215354	702005	284	7.31237	4.87e-08	REST(4):downstream_gene_variant(2)intron_variant(2)	.|.	known	a	g	0.7722	0.0748	0.0123	0.0022	0.0006672	A	G	0.00984	6.17718	4:103188709,4:89736719,4:110638824,4:110095620,4:88023870,4:26047616,4:982852,4:99998387,4:106071064,4:157682598,4:4990298,4:100504575,4:102681041,4:76572191,4:18032493	1.38271	1.25	yes	no	8.22e-08	7.08513	0.00268	2.57187	0.2804
logTG	5	104006667	112.343	rs325500	G	A	0.608947	660929	285	8.2043	6.25e-09	RP11-6N13.1(9):intron_variant(4)	NUDT12:NM_031438(dist=1108165),RAB9BP1:NR_000039(dist=428508)	novel	a	g	0.608	0.0325	-0.0119	0.0019	0.02306	A	G	-0.0101	8.54212	5:55861359,5:156391628,5:118729327,5:157999022,5:67714246,5:132444128,5:176721272,5:131320462,5:57607142,5:53304179	1.0975	1.17822	yes	no	8e-06	5.09691	0.165	0.782516	0.01768
logTG	7	18768788	33.1182	rs1178130	C	T	0.248285	674376	289	7.97711	1.05e-08	HDAC9(28):intron_variant(6)	.|.|.	known	t	c	0.266	0.1172	-0.0007	0.0022	3.05e-10	C	T	0.000401	0.0772745	7:73020337,7:130434500,7:72330303,7:25991826,7:44197583,7:71808047,7:150312307,7:17284577,7:75607155,7:71256489,7:116976830,7:116472532	118.006	1.74564	no	no	8.36e-06	5.07779	0.628	0.20204	0.5578
TC	7	143092269	158.333	rs34372369	A	G	0.0483579	674546	208	8.47156	3.38e-09	ZYX(11):downstream_gene_variant(4)|EPHA1(13):downstream_gene_variant(1)non_coding_exon_variant(3)upstream_gene_variant(1)missense_variant(1)	.	known	a	g	0.9504	0.0062	-0.0294	0.0043	0.2441	A	G	-0.0248	10.0182	7:21605973,7:44581986,7:25991826,7:1067906,7:73020301,7:100497131,7:6461310,7:97977268,7:87128356,7:137559799,7:2296552,7:50289669,7:155022821,7:17920613,7:75611149	0.943325	1.18548	yes	no	4.6e-06	5.33724	0.225	0.647817	0.01167
nonHDL	7	143092269	158.333	rs34372369	A	G	0.0482202	534955	176	8.23078	5.88e-09	ZYX(11):downstream_gene_variant(4)|EPHA1(13):downstream_gene_variant(1)non_coding_exon_variant(3)upstream_gene_variant(1)missense_variant(1)	.	known	a	g	0.9507	0.0059	-0.0319	0.0048	0.1745	A	G	-0.0272	9.55752	7:44581986,7:21598753,7:73020301,7:130432538,7:25991826,7:97977268,7:1082918,7:100280896,7:75611149,7:36171953,7:87133366	0.947797	1.17279	yes	no	1.63e-05	4.78781	0.216	0.665546	0.001237
LDL	9	125114573	148.982	rs181385018	C	T	0.00141021	304079	32	8.42003	3.8e-09	RP11-498E2.8-PTGS1(1):intergenic_region(1)	MRRF:NM_001173512(dist=28831),PTGS1:NM_001271166(dist=18236)	novel	t	c	0.0068	0.0033	-0.1608	0.0373	0.1214	C	T	0.134	4.40894	9:136149399,9:107665739,9:19296871,9:131466489,9:2640759,9:78729213,9:16901228,9:78196637	2.12034	1.2	yes	no	0.0627	1.20273	0.00674	2.17134	0.01253
TC	11	16246700	29.166	rs11023881	A	T	0.417575	772546	289	8.35254	4.44e-09	SOX6(18):intron_variant(7)	.|.|.|.	novel	a	t	0.5806	0.0475	0.0115	0.0017	0.3111	A	T	0.01	9.87943	11:116648917,11:61588305,11:122535611,11:18643559,11:126225876,11:117175658,11:5701074,11:48048802,11:75474195,11:118449746,11:2936657,11:66272976,11:12071547	0.94328	1.15	yes	no	3.57e-07	6.44733	0.653	0.185087	4.18e-05
TC	12	47180370	59.9374	rs180435	G	C	0.751485	766048	288	8.47111	3.38e-09	SLC38A4(5):intron_variant(4)	.|.	novel	c	g	0.7271	0.1387	-0.0137	0.0021	0.08083	C	G	-0.012	9.94692	12:121416650,12:111884608,12:109998097,12:9098995,12:125312425,12:123885484,12:623129,12:25409070,12:51109875,12:4384844,12:109152649,12:100836797,12:29491528,12:133062952,12:120880707,12:124491529,12:51793821	0.950032	1.14167	yes	no	9.26e-05	4.03339	0.4	0.39794	0.0002328
logTG	12	103456084	120.886	rs7958371	A	T	0.363798	668427	287	15.482	3.3e-16	ASCL1-RP11-328J6.1(1):intergenic_region(1)	ASCL1:NM_004316(dist=101790),LOC101929058:NR_126333(dist=89536)	known	a	t	0.6334	0.0455	0.0172	0.0019	0.2382	A	T	0.0144	16.1811	12:124486678,12:123209159,12:4384844,12:20470221,12:57844049,12:107205390	1.08538	1.19444	yes	no	7.3e-05	4.13668	0.91	0.0409586	2.24e-09
TC	13	76103840	75.4048	rs4643195	A	G	0.733085	712068	277	8.15494	7e-09	COMMD6(12):downstream_gene_variant(3)intron_variant(9)	.|.|.|.|.	novel	a	g	0.269	0.0237	-0.0132	0.002	0.2994	A	G	-0.0112	9.24949	13:114551993,13:32976656,13:41635301,13:111039070,13:113927208,13:74863339	0.983946	1.17857	yes	no	7.54e-08	7.12263	0.0196	1.70774	0.003559
TC	17	16854480	43.467	rs74892229	A	G	0.139096	764675	287	7.73366	1.85e-08	TNFRSF13B(9):intron_variant(7)	.	novel	a	g	0.8196	0.1198	0.0158	0.0025	0.2278	A	G	0.0136	8.40121	17:67081278,17:45717091,17:7069412,17:76378869,17:64224775,17:29452625,17:4692640,17:26949889,17:1645410,17:66004715,17:27645258,17:8219478,17:67668868,17:46529564,17:41926126,17:44989888,17:73869914,17:65370808	1.02795	1.16176	yes	no	5.69e-05	4.24489	0.0634	1.19791	0.8809
