# Supplementary material for: Implicating genes, pleiotropy, and sexual dimorphism at blood lipid loci through multi-ancestry meta-analysis
Source: Genome Biol. 2022 Dec 27;23:268. doi: 10.1186/s13059-022-02837-1 (PMC9793579; doi:10.1186/s13059-022-02837-1)
Supplement: Supplementary file 20 — Additional file 20: Table S12. Significant male-specific multi-ancestry meta-analysis results. [file 13059_2022_2837_MOESM20_ESM.xlsx]

## Sheet: Sheet1
Table S12. Significant male-specific multi-ancestry meta-analysis results
trait	chr	pos	interp_cM	rs_dbSNP147	EA	NEA	EAF	Nsample	Ncohort	neg_log10_pvalue_GC	pvalue_GC	SnpEff_ensembl_summary	ANNOVAR_refseq_Closest_gene(intergenic_only)	overlap	Metal Ref	Metal Alt	Freq1	FreqSE	Effect	StdErr	HetPVal	REF	ALT	conditional_BETA	conditional_log10P	variants_conditioned_on	ratio_actual_conditional_pvalue	ratio_actual_conditional_beta	independent	overlap_with_sex_combined	Sex-combined_Pvalue	neg_log10_sex_combined_pvalue	Female_Pvalue	neg_log10_female_pvalue	Sex_heterogeity_Pvalue
logTG	1	113060432	144.344	rs3737136	G	A	0.205595	841068	274	10.9363	1.16e-11	RP4-671G15.2(1):non_coding_exon_variant(1)|WNT2B(4):downstream_gene_variant(1)intron_variant(3)	.|.|.	known	a	g	0.2168	0.0683	-0.0162	0.002	0.8205	A	G	-0.0127	9.81248	1:62920008,1:230294715,1:219726100,1:39868621,1:63433116,1:51440093,1:27021913,1:149896413,1:61684868,1:220970028	1.31126	1.27559	yes	no	1.59e-07	6.7986	0.969	0.0136762	8.795e-07
HDL	1	207699759	228.049	rs3844496	A	G	0.258569	801400	228	7.45889	3.48e-08	CR1(12):intron_variant(11)	.|.	known	a	g	0.7259	0.1339	-0.0045	0.002	1.06e-08	A	G	-0.00373	1.43063	1:230294715,1:40035928,1:109818530,1:220970028,1:182156079,1:93845655,1:93848513,1:27180088,1:150940625,1:234852204,1:178531850,1:219664627,1:110470764,1:205677148,1:149995966,1:145472741,1:23732762,1:161194641,1:224451838,1:72754788,1:56983585,1:63099023	6.3126	1.20643	yes	no	1.22e-06	5.91364	0.14	0.853872	0.0006772
TC	10	20208680	44.7156	rs17758552	C	T	0.292518	943600	274	8.8251	1.5e-09	PLXDC2(3):intron_variant(2)	.|.	novel	t	c	0.3028	0.0557	0.0098	0.0017	0.01293	C	T	-0.00844	7.34679	10:113936855,10:124693587,10:17268839,10:71094504,10:94839724,10:96015793,10:101999746,10:45958856,10:52573772,10:118394551,10:5257647,10:114647951	1.37717	1.16114	yes	no	1.38e-07	6.86012	0.0241	1.61798	0.356
nonHDL	13	39836087	40.0996	rs2324245	A	G	0.998817	204189	24	7.55778	2.77e-08	NXT1P1-LHFP(1):intergenic_region(1)	NHLRC3:NM_001017370(dist=211843),LHFP:NM_005780(dist=80942)	novel	a	g	0.0127	0.0072	0.0736	0.0493	1.06e-08	A	G	0.0527	0.642065	13:32976656,13:114551993,13:111033821	12.6967	1.39658	yes	no	0.00125	2.90309	0.282	0.549751	1.902e-05
nonHDL	13	76498031	75.6773	rs543914686	T	TAGAC	0.00100317	207496	18	7.46466	3.43e-08	C13orf45-LINC00561(1):intergenic_region(1)	LMO7DN:NM_001257995(dist=40083),KCTD12:NM_138444(dist=956269)	novel	t	tagac	0.9984	0.001	-0.0967	0.0699	0.00437	T	TAGAC	-0.0566	0.643974	13:32976656,13:114551993,13:111033821,13:39836087	12.5044	1.70848	no	no	0.047	1.3279	0.148	0.829738	0.2563
