# Supplementary material for: Implicating genes, pleiotropy, and sexual dimorphism at blood lipid loci through multi-ancestry meta-analysis
Source: Genome Biol. 2022 Dec 27;23:268. doi: 10.1186/s13059-022-02837-1 (PMC9793579; doi:10.1186/s13059-022-02837-1)
Supplement: Supplementary file 21 — Additional file 21: Table S13. Characteristics of replication cohorts (as provided by each participating cohort). [file 13059_2022_2837_MOESM21_ESM.xlsx]

## Sheet: Sheet1
Table S13. Characteristics of replication cohorts (as provided by each participating cohort)
Cohort	Full Cohort Name	Ancestry	Replication	N (from TC)	Percent Male	mean Age	mean Age Women	mean Age Men	Fasting Status	Lipid Lowering Meds	Lipid Lowering Meds Women	Lipid Lowering Meds Men	mean HDL	mean HDL Women	mean HDL Men	mean LDL	LDL measured/Friedewald	mean LDL Women	mean LDL Men	mean TG	mean TG Women	mean TG Men	mean TC	mean TC Women	mean TC Men	Genotyping Array	Imputation Software	Imputation Panel	Association Software	Reference
AADM	Africa America Diabetes Mellitus	AFR	sex-specfic/X-chromosome	4300	0.407	51.39	50.76	52.31	Fasting	35	16	19	45.63	47.01	43.62	130.08	Measured (with Friedewald used for missing values)	135.52	122.15	110	107.94	113.01	198.43	204.72	189.23	Affymetrix Axiom® PANAFR SNP array or the Illumina Consortium Multi-Ethnic Global Array (MEGA)	PBWT	African Genome Resources Haplotype Reference Panel		Pubmed: 14988271; 11164120; 31324766
AWI-Gen	Africa Wits-INDEPTH partnership for Genomic Studies	AFR	sex-specfic	10657	45.52	51.81	51.92	51.68	Fasting	NA	NA	NA	46.404	45.6306	47.5641	87.7809	Yes	90.4878	83.9139	82.3701	82.3701	81.4844	150.426	152.747	147.719	Illumina H3A 2.3M	Sanger Pipeline PBWT	Sanger African Resource	BoltLMM	Ramsay et al. 2016, Ali et al. 2018
GNH	Genes and Health	SAS	sex-specfic/X-chromosome	28290	0.535	44.5	42.55	46.77	NA	13538	5567	7971	46.0173	49.8843	41.6476	124.517	measured	119.877	129.931	149.683	132.855	170.054	199.537	195.284	204.178	GSA v3	Michigan Imputation Server	TOPMED	SAIGE	doi.org/10.1093/ije/dyz174
KODGP	Kuwait Obesity Diabetes Genetic Program	Arabs Living in Kuwait	sex-specfic/X-chromosome	1236	0.506934	47.153	40.65 (controls); 55.36 (cases)	41.75 (controls); 52.86 (cases)	Unknown	0.1009	23 (controls); 32 (cases)	26 (controls); 50 (cases)	43.57	51.96 (controls); 47.43 (cases)	37.03 (controls); 37.93 (cases)	123.22	124.18 (controls); 114.83 (cases)	LDL measured	130.29 (controls); 122.79 (cases)	151.93	114.08 (controls); 152.95 (cases)	157.31 (controls); 185.68 (cases)	195.13	195.77 (controls); 192.73 (cases)	196.34 (controls); 195.40 (cases)	HumanOmniExpress-12V1-Multi_H, HumanOmniExpress-12v1-1_B, HumanOmniExpress-24V1	Minimac	1KGP3	Rvtests	PMID: 32902719; PMID: 30108155
KoGES	Korean Genome and Epidemiology Study	EAS	sex-specfic/X-chromosome	118234	35.6	54.13	53.69	54.91	Fasting	5103	3504	1599	52.15	54.28	48.28	120.3	Friedewald	122.8	115.8	130	117.8	152	197.6	200.2	192.9	Korea Biobank Array	Minimac v4	1KGP3	EPACTS	Moon et al. Scientific Reports 2019 (PMID: 30718733) Choi et al. Genomics & Informatics 2019 (PMID: 31896248)
MVP R3	Million Veteran Project	ASN	sex-specfic/X-chromosome	4362	0.93	52.11	41.93	52.92	NA	NA	NA	NA	39.45	49.47	38.65	143.61	Measured	141.38	143.79	282.12	202.45	288.52	227.16	226.91	227.18	MVP Genotyping Array v1.0	Minimac	1KGP3	plink2
MVP R3sub	Million Veteran Project	HIS	sex-specfic/X-chromosome	8205	0.89	53.13	41.92	54.46	NA	NA	NA	NA	37.12	46.38	36.03	139.92	Measured	135.34	140.46	274.98	194.31	284.47	221.85	218.78	222.21	MVP Genotyping Array v1.0	Minimac	1KGP3	plink2
MVP R3sub	Million Veteran Project	AdmAFR	sex-specfic/X-chromosome	18881	0.85	57.02	48.21	58.59	NA	NA	NA	NA	39.68	47.35	38.32	142.14	Measured	138.54	142.78	224.31	160.11	235.7	221.75	219.63	222.13	MVP Genotyping Array v1.0	Minimac	1KGP3	plink2
MVP R3sub	Million Veteran Project	EUR	sex-specfic/X-chromosome	69789	0.92	62.98	51.56	63.95	NA	NA	NA	NA	36.66	45.43	35.91	140.39	Measured	139.75	147.93	268.08	223.5	271.9	221.13	234.24	220.01	MVP Genotyping Array v1.0	Minimac	1KGP3	plink2
PMBB	Penn Medicine BioBank	AdmAFR	sex-specfic/X-chromosome	4086	35.8	58.7	57.4	61	Non-fasting	872	535	337	51.2	54.1	46.2	103	Measured	105	99.2	110	103	123	177	181	171	GSA V2	TopMed Imputation Server	TOPMED	PLINK	1000G
PMBB	Penn Medicine BioBank	EUR	sex-specfic/X-chromosome	1621	69.6	71.2	69.5	71.9	Non-fasting	186	62	124	49.6	58.2	45.8	90.5	Measured	98.8	86.8	125	121	127	166	182	159	GSA V2	TopMed Imputation Server	TOPMED	PLINK	1000G
ToMMo	Tohoku Medical Megabank Community-Based Cohort Study	EAS	sex-specfic/X-chromosome	41978	0.35547	59.106	57.815	61.445	0.25101	0.11277	0.12204	0.09597	65.174	67.3208	56.7407	128.55	Both	132.296	123.025	111.469	100.191	131.918	215.839	218.152	206.753	Japonica Array v2	SHAPEIT2 & IMPUTE4	Cross-imputed panel (TMM 3.5KJPNv2 & 1000 Genomes Phase3)	GCTA	Kuriyama S et al. J Epidemiol 26:493-511, 2016. Hozawa A et al. J Epidemiol 31:65-76, 2021.
