# Supplementary material for: Implicating genes, pleiotropy, and sexual dimorphism at blood lipid loci through multi-ancestry meta-analysis
Source: Genome Biol. 2022 Dec 27;23:268. doi: 10.1186/s13059-022-02837-1 (PMC9793579; doi:10.1186/s13059-022-02837-1)
Supplement: Supplementary file 22 — Additional file 22: Table S14. Test for difference in effects for index variants from sex-stratified meta-analysis. [file 13059_2022_2837_MOESM22_ESM.xlsx]

## Sheet: Sheet1
Table S14: Test for difference in effects for index variants from sex-stratified meta-analysis
Multi-ancestry index variants from the female sex-specific analysis not overlapping with the sex-combined analysis
Trait	chr	pos	rsID	Ref	Alt	Replication N	replication_Zscore	replication_pvalue
logTG	3	64718258	rs2371767	C	G	311120	0.909	0.3634
TC	3	105480291	rs7644634	T	C	283578	0.295	0.7683
HDL	4	57779567	rs781658	A	G	215472	-0.675	0.4994
logTG	5	104006667	rs325500	A	G	311120	-0.315	0.7527
nonHDL	7	143092269	rs34372369	A	G	153019	0.177	0.8592
TC	7	143092269	rs34372369	A	G	254077	0.597	0.5508
LDL	9	125114573	rs181385018	T	C	226934	0.535	0.5929
TC	11	16246700	rs11023881	A	T	283578	-0.449	0.6536
TC	12	47180370	rs180435	C	G	283578	0.442	0.6583
logTG	12	103456084	rs7958371	A	T	311120	-2.334	0.0196
TC	13	76103840	rs4643195	A	G	214050	0.784	0.4331
TC	17	16854480	rs74892229	A	G	283578	0.312	0.7551
Multi-ancestry index variants from the male sex-specific analysis not overlapping with the sex-combined analysis
Trait	chr	pos	rsID	Ref	Alt	Replication N	replication_Zscore	replication_pvalue
logTG	1	113060432	rs3737136	A	G	311120	-0.177	0.8599
HDL	1	207699759	rs3844496	A	G	274451	-1.102	0.2704
TC	10	20208680	rs17758552	T	C	283578	1.834	0.06672
nonHDL	13	39836087	rs2324245	A	G	10001	0.304	0.7614
