# Supplementary material for: Implicating genes, pleiotropy, and sexual dimorphism at blood lipid loci through multi-ancestry meta-analysis
Source: Genome Biol. 2022 Dec 27;23:268. doi: 10.1186/s13059-022-02837-1 (PMC9793579; doi:10.1186/s13059-022-02837-1)
Supplement: Supplementary file 23 — Additional file 23: Table S15. Comparison of the sex-specific effects. [file 13059_2022_2837_MOESM23_ESM.xlsx]

## Sheet: Sheet1
Table S15. Comparison of the sex-stratified effect size estimates
trait	chr	pos	Ref	Alt	rsID	neg_log10_pvalue_GC	pvalue_GC	Frequency	Effect	StdErr	men_Effect	men_StdErr	men_P-value	women_Effect	women_StdErr	women_P-value	Z_diff	p_diff	sig_diff_by_sex	within_cohort_sex_diff_pvalue	sig_diff_within_cohort
HDL	1	914852	C	G	rs13303368	9.23262	5.85e-10	0.4176	0.0097	0.0014	0.0102	0.0018	7.1e-09	0.0102	0.0021	6.289e-07	0	1	not_sig	0.9928	not_sig
HDL	1	1831012	T	C	rs7542410	7.53166	2.94e-08	0.5159	0.0087	0.0013	0.0068	0.0017	3.862e-05	0.0095	0.0019	3.908e-07	-1.0678	0.285611	not_sig	0.8104	not_sig
logTG	1	2147162	T	C	rs6605083	9.95691	1.1e-10	0.2618	0.0099	0.0015	0.011	0.0019	8.744e-09	0.0073	0.0022	0.001139	1.28031	0.200436	not_sig	0.05547	not_sig
LDL	1	2326009	A	G	rs1123571	11.5873	2.59e-12	0.5531	0.0106	0.0013	0.0083	0.0017	7.732e-07	0.0134	0.0019	3.145e-12	-2.01465	0.0439415	not_sig	0.01569	not_sig
HDL	1	2975119	C	G	rs55775305	7.52921	2.96e-08	0.1646	-0.013	0.0018	-0.0119	0.0024	7.046e-07	-0.0146	0.0026	3.414e-08	0.769405	0.441653	not_sig	0.6176	not_sig
TC	1	10796866	T	C	rs880315	10.0376	9.17e-11	0.3597	-0.01	0.0013	-0.0111	0.0017	3.629e-11	-0.0084	0.0019	9.027e-06	-1.06716	0.2859	not_sig	0.2348	not_sig
HDL	1	12518739	A	G	rs191220001	7.30338	4.97e-08	0.0061	0.0519	0.0093	0.0376	0.0125	0.002581	0.0647	0.0132	8.937e-07	-1.50311	0.132811	not_sig	0.1834	not_sig
LDL	1	15914648	A	G	rs6690758	8.64681	2.26e-09	0.679	-0.01	0.0014	-0.0094	0.0018	1.175e-07	-0.0114	0.002	1.435e-08	0.748598	0.4541	not_sig	0.3377	not_sig
TC	1	15914648	A	G	rs6690758	7.97097	1.07e-08	0.6697	-0.009	0.0013	-0.0077	0.0016	2.717e-06	-0.0112	0.0018	1.099e-09	1.46445	0.143072	not_sig	0.0606	not_sig
logTG	1	16508059	A	G	rs12562207	11.3814	4.16e-12	0.3872	-0.008	0.0013	-0.0076	0.0017	6.097e-06	-0.0095	0.0019	7.086e-07	0.749636	0.453474	not_sig	0.9569	not_sig
LDL	1	16510894	T	C	rs36086195	21.6404	2.29e-22	0.4363	-0.014	0.0013	-0.0132	0.0017	9.442e-15	-0.0149	0.0019	1.523e-14	0.671549	0.501871	not_sig	0.5547	not_sig
nonHDL	1	16510894	T	C	rs36086195	18.3242	4.74e-19	0.418	-0.015	0.0015	-0.0142	0.0022	1.19e-10	-0.0155	0.0021	4.797e-14	0.429271	0.667726	not_sig	0.7476	not_sig
TC	1	16510894	T	C	rs36086195	23.5742	2.67e-24	0.4297	-0.014	0.0012	-0.0122	0.0016	3.268e-14	-0.0167	0.0018	1.859e-20	1.88286	0.0597195	not_sig	0.2281	not_sig
TC	1	18802825	A	G	rs2992732	8.49642	3.19e-09	0.3555	0.009	0.0013	0.0068	0.0016	3.123e-05	0.012	0.0018	7.451e-11	-2.17575	0.0295741	not_sig	0.02192	not_sig
LDL	1	18808526	A	C	rs2992752	11.0107	9.76e-12	0.6388	-0.01	0.0013	-0.0101	0.0017	2.926e-09	-0.011	0.002	1.971e-08	0.3453	0.729869	not_sig	0.2648	not_sig
HDL	1	20916080	C	G	rs589942	11.0112	9.75e-12	0.3081	-0.011	0.0014	-0.011	0.0018	3.836e-10	-0.0125	0.002	3.183e-10	0.562092	0.574054	not_sig	0.9223	not_sig
HDL	1	23734350	A	C	rs1767141	19.0553	8.8e-20	0.9025	0.0222	0.0021	0.0222	0.0028	2.375e-15	0.0217	0.0031	4.048e-12	0.120687	0.903939	not_sig	0.9786	not_sig
logTG	1	23747996	G	GA	rs11340914	13.8179	1.52e-14	0.3183	-0.013	0.0015	-0.0137	0.0019	4.52e-13	-0.0128	0.0023	1.736e-08	-0.303438	0.761556	not_sig	0.284	not_sig
TC	1	23769359	T	C	rs946269	37.8825	1.31e-38	0.7829	0.0225	0.0016	0.0209	0.002	2.596e-25	0.0249	0.0023	9.329e-28	-1.3224	0.186036	not_sig	0.4459	not_sig
LDL	1	23784965	A	G	rs534417	12.7377	1.83e-13	0.792	0.0145	0.0017	0.0131	0.0022	5.012e-09	0.0184	0.0026	1.089e-12	-1.56714	0.117081	not_sig	0.6023	not_sig
nonHDL	1	23785760	T	C	rs7551124	16.8686	1.35e-17	0.1881	-0.019	0.002	-0.0228	0.0029	1.585e-15	-0.0174	0.0027	1.102e-10	-1.36867	0.171101	not_sig	0.1327	not_sig
HDL	1	25049949	A	G	rs2361147	7.46988	3.39e-08	0.2889	-0.009	0.0014	-0.0098	0.0018	2.909e-08	-0.0078	0.002	0.0001058	-0.749456	0.453583	not_sig	0.2362	not_sig
TC	1	25760920	T	C	rs11802413	84.281	5.24e-85	0.4622	-0.025	0.0012	-0.0257	0.0016	4.391e-58	-0.0268	0.0018	3.812e-50	0.460254	0.645334	not_sig	0.08971	not_sig
nonHDL	1	25764177	A	G	rs9438905	64.999	1e-65	0.5205	0.027	0.0015	0.0308	0.0021	2.652e-47	0.0244	0.002	4.963e-35	2.21636	0.0266666	not_sig	0.00646	not_sig
LDL	1	25768937	A	G	rs10903129	81.1785	6.63e-82	0.5377	0.0254	0.0013	0.0255	0.0016	9.943e-55	0.0269	0.0019	1.171e-46	-0.567603	0.570304	not_sig	0.1027	not_sig
logTG	1	26232356	A	C	rs213641	8.5056	3.12e-09	0.3871	-0.009	0.0013	-0.0075	0.0017	9.719e-06	-0.0108	0.0019	1.06e-08	1.302	0.192917	not_sig	0.3097	not_sig
LDL	1	26512556	T	C	rs113565903	11.7925	1.61e-12	0.9745	-0.034	0.0044	-0.0307	0.0057	9.073e-08	-0.0409	0.0064	1.6e-10	1.19864	0.230668	not_sig	0.7209	not_sig
nonHDL	1	26512556	T	C	rs113565903	12.5392	2.89e-13	0.9753	-0.041	0.0051	-0.0313	0.0076	3.682e-05	-0.0483	0.0069	1.963e-12	1.66319	0.0962736	not_sig	0.254	not_sig
LDL	1	27021913	C	G	rs114165349	66.6192	2.4e-67	0.9773	-0.083	0.0045	-0.0584	0.006	3.092e-22	-0.1121	0.0065	7.576e-66	6.11402	9.71503e-10	sig	2.785e-07	sig
logTG	1	27021913	C	G	rs114165349	43.0802	8.31e-44	0.9773	-0.068	0.0045	-0.0519	0.006	2.97e-18	-0.0862	0.0065	1.016e-40	3.90043	9.60205e-05	sig	0.002522	not_sig
nonHDL	1	27021913	C	G	rs114165349	69.8397	1.45e-70	0.9768	-0.097	0.0052	-0.0717	0.0079	1.235e-19	-0.1201	0.007	1.249e-65	4.60501	4.12441e-06	sig	2.804e-06	sig
TC	1	27021913	C	G	rs114165349	35.2077	6.2e-36	0.9775	-0.06	0.0044	-0.0407	0.0059	4.182e-12	-0.0838	0.0063	1.785e-40	5.03193	4.85571e-07	sig	1.258e-05	sig
HDL	1	27180088	A	C	rs75460349	73.6249	2.37e-74	0.023	-0.086	0.0044	-0.0763	0.0058	1.006e-39	-0.0976	0.0065	1.23e-50	2.4653	0.01369	not_sig	0.2209	not_sig
LDL	1	27668610	T	C	rs41291086	21.1181	7.62e-22	0.9626	-0.038	0.0037	-0.0289	0.0048	1.969e-09	-0.05	0.0053	4.962e-21	2.9719	0.00295963	not_sig	0.03153	not_sig
logTG	1	27688814	T	C	rs41309280	7.8551	1.4e-08	0.9637	-0.023	0.0037	-0.0161	0.0049	0.0009137	-0.032	0.0053	1.786e-09	2.21585	0.0267021	not_sig	0.1304	not_sig
nonHDL	1	27688814	T	C	rs41309280	19.3736	4.23e-20	0.9629	-0.044	0.0043	-0.0278	0.0063	9.998e-06	-0.0551	0.0058	1.515e-21	3.20167	0.00136633	not_sig	0.002498	not_sig
TC	1	27688814	T	C	rs41309280	11.1475	7.12e-12	0.9639	-0.029	0.0036	-0.0206	0.0048	1.786e-05	-0.0399	0.0052	1.335e-14	2.74825	0.00599135	not_sig	0.05999	not_sig
HDL	1	28319484	A	G	rs7549174	17.8445	1.43e-18	0.3375	-0.014	0.0013	-0.0104	0.0017	9.715e-10	-0.0186	0.0019	4.843e-22	3.24295	0.001183	not_sig	0.004164	not_sig
TC	1	28319484	A	G	rs7549174	16.136	7.31e-17	0.3415	-0.012	0.0013	-0.0106	0.0016	7.981e-11	-0.0148	0.0018	5.825e-16	1.75734	0.0788607	not_sig	0.08643	not_sig
logTG	1	36021738	T	C	rs6696836	7.69495	2.02e-08	0.3323	0.017	0.0024	0.015	0.0031	1.132e-06	0.0176	0.0037	2.401e-06	-0.541782	0.587969	not_sig	0.6525	not_sig
logTG	1	39312160	A	G	rs59703905	7.90199	1.25e-08	0.8016	-0.011	0.0016	-0.0074	0.0021	0.0005305	-0.0162	0.0024	2.756e-11	2.77567	0.00550873	not_sig	0.0005113	not_sig
HDL	1	39438889	T	C	rs4660446	11.6457	2.26e-12	0.5963	-0.012	0.0014	-0.0086	0.0018	1.822e-06	-0.0154	0.0021	9.167e-14	2.4788	0.0131827	not_sig	0.02076	not_sig
TC	1	39451488	A	G	rs4329504	9.75294	1.77e-10	0.3897	-0.01	0.0013	-0.0087	0.0017	3.257e-07	-0.0125	0.0019	1.956e-11	1.50193	0.133116	not_sig	0.06818	not_sig
HDL	1	40035928	T	G	rs3768321	134.802	1.58e-135	0.8175	0.0441	0.0017	0.0431	0.0022	3.766e-87	0.0475	0.0024	6.909e-88	-1.36267	0.172986	not_sig	0.2946	not_sig
logTG	1	40035928	T	G	rs3768321	29.6563	2.21e-30	0.8165	-0.021	0.0017	-0.0203	0.0022	3.75e-20	-0.0239	0.0024	3.878e-23	1.11227	0.266023	not_sig	0.3696	not_sig
TC	1	45494828	C	G	rs7514998	11.1264	7.48e-12	0.706	0.0093	0.0013	0.0107	0.0017	3.598e-10	0.0088	0.0019	4.403e-06	0.750963	0.452675	not_sig	0.3612	not_sig
LDL	1	45810865	A	G	rs17853159	13.5603	2.75e-14	0.9246	0.0217	0.0025	0.0196	0.0033	2.587e-09	0.0243	0.0037	6.196e-11	-0.954754	0.339702	not_sig	0.2393	not_sig
nonHDL	1	49204135	A	G	rs143064733	8.36488	4.32e-09	0.9979	0.1267	0.0196	0.1121	0.0262	1.911e-05	0.1456	0.0295	7.973e-07	-0.852691	0.393831	not_sig	0.892	not_sig
LDL	1	49263479	A	G	rs547856250	11.1003	7.94e-12	0.9978	0.1356	0.0192	0.1391	0.0259	8.13e-08	0.1408	0.0284	7.02e-07	-0.0445447	0.96447	not_sig	0.1674	not_sig
logTG	1	51209148	T	C	rs79090772	20.7794	1.66e-21	0.0944	-0.023	0.0022	-0.0253	0.0028	1.929e-19	-0.0236	0.0032	1.104e-13	-0.402157	0.687568	not_sig	0.8611	not_sig
LDL	1	52262405	A	G	rs570553136	14.2577	5.53e-15	0.0026	-0.168	0.0186	-0.1506	0.0251	1.908e-09	-0.1935	0.0274	1.791e-12	1.16276	0.244927	not_sig	0.1508	not_sig
nonHDL	1	52262405	A	G	rs570553136	11.9353	1.16e-12	0.0026	-0.159	0.0191	-0.1578	0.0306	2.409e-07	-0.1827	0.0285	1.455e-10	0.598011	0.549832	not_sig	0.2519	not_sig
TC	1	52262405	A	G	rs570553136	11.7102	1.95e-12	0.0026	-0.157	0.0183	-0.1485	0.0248	2.225e-09	-0.1704	0.0271	3.165e-10	0.600752	0.548005	not_sig	0.2505	not_sig
LDL	1	54246772	T	C	rs191875604	28.2162	6.08e-29	0.0024	-0.189	0.0167	-0.1676	0.0218	1.429e-14	-0.2252	0.0257	2.117e-18	1.72127	0.0852026	not_sig	0.9891	not_sig
nonHDL	1	54246772	T	C	rs191875604	19.9867	1.03e-20	0.0024	-0.183	0.0183	-0.1648	0.0231	9.144e-13	-0.2046	0.0268	2.135e-14	1.12966	0.25862	not_sig	0.4453	not_sig
TC	1	54246772	T	C	rs191875604	18.9494	1.12e-19	0.0024	-0.165	0.0165	-0.1444	0.0215	1.886e-11	-0.2006	0.0254	3.104e-15	1.70168	0.088815	not_sig	0.8036	not_sig
LDL	1	54824117	A	G	rs146568567	62.4702	3.39e-63	0.995	0.1162	0.0102	0.1201	0.0133	2.01e-19	0.1013	0.015	1.268e-11	0.944467	0.344931	not_sig	0.8056	not_sig
nonHDL	1	54824117	A	G	rs146568567	42.945	1.14e-43	0.9947	0.1093	0.0112	0.1173	0.0152	1.229e-14	0.087	0.0157	3.228e-08	1.39252	0.163764	not_sig	0.6398	not_sig
logTG	1	54890956	T	G	rs1883783	17.4626	3.45e-18	0.6	0.0115	0.0013	0.0094	0.0017	2.175e-08	0.0147	0.0019	7.182e-15	-2.09109	0.0365201	not_sig	0.1656	not_sig
LDL	1	55505647	T	G	rs11591147	1363.47	0	0.9841	0.4337	0.0053	0.4373	0.0069	0	0.4477	0.0079	0	-0.99856	0.318008	not_sig	0.1529	not_sig
nonHDL	1	55505647	T	G	rs11591147	874.114	0	0.984	0.4116	0.0063	0.4241	0.0091	0	0.4148	0.0085	0	0.750049	0.453225	not_sig	0.4656	not_sig
TC	1	55505647	T	G	rs11591147	1069.83	0	0.9842	0.3773	0.0052	0.3718	0.0067	0	0.3996	0.0076	0	-2.76491	0.00569382	not_sig	0.6051	not_sig
nonHDL	1	56105434	C	G	rs150103689	68.4841	3.28e-69	0.0018	-0.366	0.0201	-0.3522	0.0318	1.938e-28	-0.3446	0.0297	3.333e-31	-0.175411	0.860757	not_sig	0.2013	not_sig
LDL	1	56840574	A	C	rs186538116	68.9699	1.07e-69	0.0021	-0.361	0.0191	-0.3915	0.0254	1.47e-53	-0.3327	0.029	1.968e-30	-1.53611	0.124511	not_sig	0.6498	not_sig
nonHDL	1	56840574	A	C	rs186538116	54.3257	4.72e-55	0.0021	-0.327	0.0198	-0.3282	0.0317	4.551e-25	-0.2978	0.0305	1.472e-22	-0.694028	0.487664	not_sig	0.8727	not_sig
TC	1	56840574	A	C	rs186538116	49.0988	7.97e-50	0.002	-0.307	0.0188	-0.3379	0.025	1.233e-41	-0.2808	0.0287	1.189e-22	-1.51168	0.130616	not_sig	0.5059	not_sig
HDL	1	56983585	A	G	rs61772595	9.90598	1.24e-10	0.8789	0.0151	0.002	0.0181	0.0026	5.67e-12	0.012	0.0029	4.497e-05	1.57914	0.114304	not_sig	0.03651	not_sig
nonHDL	1	57851746	A	G	rs115947018	11.6641	2.17e-12	0.9796	0.0213	0.0057	0.0363	0.0083	1.172e-05	0.0107	0.0076	0.1608	2.2845	0.0223421	not_sig	0.06753	not_sig
LDL	1	57872099	T	C	rs185172024	15.5314	2.94e-16	0.0019	-0.141	0.0182	-0.1261	0.0233	5.886e-08	-0.1664	0.0285	5.348e-09	1.10244	0.27027	not_sig	0.04258	not_sig
TC	1	57872099	T	C	rs185172024	11.4688	3.4e-12	0.0018	-0.119	0.0178	-0.0911	0.0229	7.088e-05	-0.1656	0.0279	2.952e-09	2.07966	0.0375569	not_sig	0.02487	not_sig
logTG	1	61684630	A	G	rs72929847	14.1557	6.99e-15	0.9143	0.021	0.0024	0.0253	0.0031	1.222e-16	0.0174	0.0035	5.859e-07	1.69962	0.0892021	not_sig	0.01191	not_sig
nonHDL	1	61684630	A	G	rs72929847	9.85306	1.4e-10	0.9184	0.021	0.0029	0.0238	0.0043	2.451e-08	0.0176	0.0038	3.878e-06	1.08503	0.277907	not_sig	0.2883	not_sig
TC	1	61692655	T	C	rs17121833	9.13137	7.39e-10	0.0742	-0.018	0.0024	-0.0218	0.0031	2.301e-12	-0.0123	0.0035	0.0004522	-2.04746	0.0406125	not_sig	0.1262	not_sig
LDL	1	61865627	T	C	rs2207794	8.36258	4.34e-09	0.7353	0.0098	0.0015	0.0093	0.0019	1.229e-06	0.0113	0.0022	2.604e-07	-0.692904	0.48837	not_sig	0.7393	not_sig
LDL	1	62920008	A	G	rs636523	190.017	9.61e-191	0.344	-0.041	0.0013	-0.0364	0.0018	6.99e-96	-0.0499	0.002	3.09e-140	5.05303	4.34848e-07	sig	0.01078	not_sig
logTG	1	62920008	A	G	rs636523	598.137	0	0.3437	-0.073	0.0013	-0.0787	0.0017	0	-0.0685	0.0019	1.22e-271	-4.02436	5.71305e-05	sig	0.0001637	not_sig
nonHDL	1	62920008	A	G	rs636523	323.13	0	0.3335	-0.063	0.0016	-0.0639	0.0023	3.73e-173	-0.0647	0.0021	7.48e-209	0.257963	0.796435	not_sig	0.9735	not_sig
HDL	1	63050598	T	G	rs3850634	20.4104	3.89e-21	0.334	-0.013	0.0013	-0.0098	0.0017	7.886e-09	-0.0173	0.0019	4.339e-19	2.96611	0.00301591	not_sig	8.569e-05	sig
TC	1	63107526	T	C	rs995000	518.919	0	0.6676	0.0647	0.0013	0.0615	0.0016	2.99e-308	0.0711	0.0018	0	-4.01677	5.90022e-05	sig	0.00923	not_sig
logTG	1	63433116	A	G	rs772075075	31.2738	5.32e-32	0.9988	0.3593	0.0285	0.399	0.0396	7.805e-24	0.3104	0.037	4.977e-17	1.6445	0.100074	not_sig	0.1114	not_sig
nonHDL	1	63433116	A	G	rs772075075	18.3966	4.01e-19	0.9987	0.2823	0.029	0.3188	0.041	7.576e-15	0.2356	0.0384	8.518e-10	1.48745	0.136896	not_sig	0.1308	not_sig
LDL	1	63679932	A	C	rs574313788	10.157	6.97e-11	0.0003	-0.423	0.0602	-0.3618	0.0872	3.35e-05	-0.3825	0.0789	1.255e-06	0.177282	0.859287	not_sig	0.7886	not_sig
TC	1	63679932	A	C	rs574313788	19.341	4.56e-20	0.0003	-0.554	0.0573	-0.4822	0.0863	2.285e-08	-0.4819	0.0752	1.472e-10	-0.0026409	0.997893	not_sig	0.7595	not_sig
logTG	1	64576995	T	C	rs530208504	8.19261	6.42e-09	0.9982	0.0775	0.0218	0.1266	0.0302	2.801e-05	0.0719	0.0286	0.01193	1.32291	0.185866	not_sig	0.3071	not_sig
HDL	1	66098653	T	C	rs1938498	11.8602	1.38e-12	0.4145	0.0108	0.0013	0.007	0.0016	2.171e-05	0.0152	0.0019	8.333e-16	-3.32831	0.000873753	not_sig	0.01299	not_sig
LDL	1	66130398	A	G	rs4655772	7.31414	4.85e-08	0.5578	0.008	0.0013	0.0074	0.0017	9.919e-06	0.0094	0.0019	1.041e-06	-0.790058	0.429494	not_sig	0.3167	not_sig
TC	1	66133443	A	T	rs11208700	12.547	2.84e-13	0.5625	0.0102	0.0012	0.0084	0.0016	1.843e-07	0.0136	0.0018	5.75e-14	-2.17575	0.0295741	not_sig	0.03974	not_sig
logTG	1	71397835	A	G	rs583691	7.98846	1.03e-08	0.5398	-0.009	0.0013	-0.0078	0.0017	3.145e-06	-0.0108	0.0019	1.089e-08	1.18364	0.236557	not_sig	0.2611	not_sig
HDL	1	71428732	A	C	rs657262	12.2633	5.45e-13	0.6282	0.0111	0.0013	0.0091	0.0016	2.79e-08	0.0131	0.0019	2.353e-12	-1.62356	0.104469	not_sig	0.1579	not_sig
HDL	1	72754788	T	C	rs2613496	11.7903	1.62e-12	0.804	-0.013	0.0016	-0.0135	0.0021	2.912e-10	-0.0135	0.0024	3.613e-08	0	1	not_sig	0.3807	not_sig
logTG	1	72835410	T	C	rs2613505	10.4445	3.59e-11	0.1811	-0.013	0.0017	-0.0135	0.0022	6.402e-10	-0.0128	0.0024	1.746e-07	-0.216274	0.828774	not_sig	0.6863	not_sig
nonHDL	1	78070458	T	C	rs9787306	7.33709	4.6e-08	0.768	0.0095	0.0018	0.0101	0.0026	9.395e-05	0.0092	0.0024	0.0001297	0.255444	0.79838	not_sig	0.7368	not_sig
HDL	1	85721911	T	C	rs11161570	7.85363	1.4e-08	0.5124	-0.008	0.0012	-0.0077	0.0016	1.967e-06	-0.0074	0.0018	5.387e-05	-0.125599	0.900049	not_sig	0.7728	not_sig
logTG	1	91533297	A	G	rs165316	11.9916	1.02e-12	0.1931	-0.013	0.0016	-0.0137	0.002	1.679e-11	-0.0111	0.0023	1.493e-06	-0.858044	0.390868	not_sig	0.5082	not_sig
nonHDL	1	91533297	A	G	rs165316	11.1406	7.23e-12	0.1932	-0.013	0.0019	-0.0076	0.0027	0.004134	-0.0166	0.0025	1.359e-11	2.45634	0.014036	not_sig	0.02546	not_sig
TC	1	91533297	A	G	rs165316	17.7175	1.92e-18	0.1937	-0.014	0.0015	-0.0102	0.0019	1.235e-07	-0.0191	0.0022	7.863e-19	3.08509	0.00203488	not_sig	0.001245	not_sig
nonHDL	1	92946479	A	G	rs11164605	26.9722	1.07e-27	0.1974	-0.023	0.002	-0.0235	0.0029	5.115e-16	-0.0234	0.0026	5.192e-19	-0.0257844	0.979429	not_sig	0.6891	not_sig
LDL	1	92971951	T	C	rs2391159	38.9418	1.14e-39	0.8039	0.0234	0.0016	0.023	0.0021	5.578e-27	0.0238	0.0024	7.51e-23	-0.252643	0.800544	not_sig	0.6698	not_sig
TC	1	93130268	T	C	rs7530780	43.5535	2.8e-44	0.3592	-0.019	0.0013	-0.0168	0.0017	1.569e-23	-0.0223	0.0019	7.101e-32	2.17384	0.0297171	not_sig	0.09196	not_sig
logTG	1	93850283	A	C	rs12133907	13.6551	2.21e-14	0.4127	-0.011	0.0013	-0.0121	0.0017	4.216e-13	-0.0105	0.0019	3.226e-08	-0.631272	0.527863	not_sig	0.5398	not_sig
HDL	1	93860625	A	G	rs12406245	72.642	2.28e-73	0.3896	0.0257	0.0013	0.0245	0.0017	1.246e-48	0.0283	0.0019	2.217e-50	-1.50283	0.132883	not_sig	0.3847	not_sig
logTG	1	98395881	T	G	rs4378243	11.2178	6.06e-12	0.1767	0.0133	0.0017	0.0096	0.0022	9.996e-06	0.0188	0.0025	2.301e-14	-2.77888	0.00545461	not_sig	0.02402	not_sig
nonHDL	1	107551018	CA	C	rs397981117	8.54373	2.86e-09	0.6728	-0.012	0.0017	-0.0073	0.0024	0.002459	-0.0151	0.0023	2.159e-11	2.35653	0.0184466	not_sig	0.03702	not_sig
LDL	1	107607037	T	G	rs1977658	14.634	2.32e-15	0.6805	-0.013	0.0015	-0.0126	0.0019	1.68e-11	-0.0161	0.0022	3.574e-13	1.21258	0.225289	not_sig	0.03627	not_sig
LDL	1	109310728	A	G	rs115292790	18.6001	2.51e-19	0.9868	0.0585	0.0059	0.0802	0.0078	7.836e-25	0.0393	0.0087	5.655e-06	3.5253	0.000423009	not_sig	0.002612	not_sig
TC	1	109310728	A	G	rs115292790	10.4413	3.62e-11	0.9869	0.0435	0.0058	0.0609	0.0076	1.309e-15	0.0291	0.0083	0.0004474	2.84744	0.00440729	not_sig	0.01998	not_sig
logTG	1	109817192	A	G	rs7528419	9.73289	1.85e-10	0.2212	-0.012	0.0015	-0.0107	0.0019	4.008e-08	-0.0137	0.0022	8.544e-10	1.03809	0.299229	not_sig	0.3169	not_sig
HDL	1	109817590	T	G	rs12740374	96.8786	1.32e-97	0.7805	-0.034	0.0015	-0.036	0.002	2.842e-75	-0.0327	0.0023	3.232e-47	-1.09163	0.274995	not_sig	0.3729	not_sig
LDL	1	109817590	T	G	rs12740374	2030.86	0	0.7805	0.1514	0.0015	0.1602	0.002	0	0.1465	0.0023	0	4.52676	5.98952e-06	sig	4.862e-07	sig
nonHDL	1	109817590	T	G	rs12740374	1188.38	0	0.7828	0.1393	0.0018	0.1567	0.0027	0	0.1324	0.0025	0	6.63212	3.30893e-11	sig	8.126e-10	sig
TC	1	109817590	T	G	rs12740374	1496.7	0	0.7805	0.127	0.0015	0.1354	0.0019	0	0.1227	0.0022	0	4.40232	1.07097e-05	sig	5.286e-07	sig
LDL	1	110326545	A	G	rs140266316	18.2212	6.01e-19	0.9839	0.0591	0.0059	0.0748	0.0078	8.389e-22	0.0497	0.0084	3.045e-09	2.20532	0.0274314	not_sig	0.1182	not_sig
nonHDL	1	110326545	A	G	rs140266316	10.5478	2.83e-11	0.9837	0.0522	0.0067	0.0704	0.0101	2.619e-12	0.0433	0.0089	1.257e-06	2.02168	0.0432094	not_sig	0.01399	not_sig
TC	1	110326545	A	G	rs140266316	10.0712	8.49e-11	0.9839	0.0442	0.0057	0.0592	0.0076	5.268e-15	0.0362	0.008	6.068e-06	2.10046	0.0356887	not_sig	0.1951	not_sig
HDL	1	110470764	A	G	rs333947	46.2801	5.25e-47	0.8247	0.0278	0.0017	0.0256	0.0023	2.268e-28	0.0317	0.0025	9.166e-36	-1.81059	0.0702047	not_sig	0.6306	not_sig
TC	1	114489689	T	C	rs1503832	7.42711	3.74e-08	0.272	-0.009	0.0013	-0.0063	0.0017	0.0002314	-0.0123	0.0019	1.732e-10	2.37146	0.0177178	not_sig	0.1541	not_sig
TC	1	118172538	A	G	rs6696923	8.3918	4.06e-09	0.3648	0.0086	0.0013	0.0071	0.0017	1.733e-05	0.0113	0.0018	9.231e-10	-1.70945	0.0873678	not_sig	0.163	not_sig
HDL	1	120484718	T	C	rs186147970	8.07623	8.39e-09	0.0045	0.0889	0.0129	0.1006	0.0174	7.323e-09	0.0735	0.018	4.495e-05	1.0915	0.275055	not_sig	0.7118	not_sig
HDL	1	145472741	A	C	rs181473381	24.0204	9.54e-25	0.996	-0.144	0.0128	-0.1345	0.0165	3.071e-16	-0.1488	0.0191	6.652e-15	0.571232	0.567842	not_sig	0.6553	not_sig
TC	1	145472741	A	C	rs181473381	13.3844	4.13e-14	0.996	-0.104	0.0124	-0.0994	0.016	5.229e-10	-0.1098	0.0184	2.396e-09	0.429779	0.667356	not_sig	0.8111	not_sig
logTG	1	149899389	A	G	rs45548131	19.9169	1.21e-20	0.9266	0.0253	0.0025	0.0279	0.0033	1.609e-17	0.0221	0.0037	1.945e-09	1.17676	0.23929	not_sig	0.2313	not_sig
HDL	1	149992277	T	C	rs192434510	17.8988	1.26e-18	0.0845	0.0244	0.0024	0.0283	0.0031	2.236e-19	0.0213	0.0036	2.238e-09	1.48558	0.137389	not_sig	0.1838	not_sig
HDL	1	150842696	T	C	rs72992015	36.4318	3.7e-37	0.8066	-0.022	0.0016	-0.0246	0.0021	2.589e-32	-0.0197	0.0023	2.486e-17	-1.58636	0.112659	not_sig	0.1997	not_sig
LDL	1	150958836	A	G	rs267733	21.5728	2.67e-22	0.1476	-0.02	0.0018	-0.0175	0.0024	1.199e-13	-0.0228	0.0027	2.341e-17	1.47759	0.139518	not_sig	0.4681	not_sig
nonHDL	1	150958836	A	G	rs267733	14.2389	5.77e-15	0.1488	-0.02	0.0022	-0.0158	0.0032	6.764e-07	-0.0211	0.0029	3.326e-13	1.2325	0.217761	not_sig	0.1071	not_sig
TC	1	151064116	A	G	rs61819215	9.89518	1.27e-10	0.0657	-0.018	0.0025	-0.0156	0.0032	1.091e-06	-0.0204	0.0036	1.545e-08	1.00419	0.315286	not_sig	0.7104	not_sig
LDL	1	151658543	A	G	rs184980867	13.1726	6.72e-14	0.9966	0.1125	0.0132	0.0956	0.0178	8.234e-08	0.1319	0.0184	7.817e-13	-1.42809	0.153265	not_sig	0.09393	not_sig
TC	1	154243457	A	T	rs12354278	7.48279	3.29e-08	0.1211	0.0126	0.0019	0.0111	0.0025	7.405e-06	0.0155	0.0028	2.551e-08	-1.18119	0.237529	not_sig	0.4663	not_sig
logTG	1	154251626	A	G	rs12750321	17.857	1.39e-18	0.2947	-0.014	0.0014	-0.0123	0.0019	3.737e-11	-0.0166	0.0021	1.405e-15	1.52735	0.126675	not_sig	0.4517	not_sig
nonHDL	1	154251626	A	G	rs12750321	7.43697	3.66e-08	0.3099	-0.011	0.0016	-0.0124	0.0023	9.383e-08	-0.0111	0.0022	3.955e-07	-0.410202	0.681658	not_sig	0.4262	not_sig
HDL	1	154555733	A	T	rs9616	7.6313	2.34e-08	0.2825	0.0095	0.0014	0.0044	0.0019	0.01626	0.016	0.0021	7.496e-15	-4.13007	3.62645e-05	sig	3.949e-05	sig
logTG	1	155033334	A	G	rs12743272	8.03947	9.13e-09	0.8718	-0.013	0.0019	-0.0125	0.0025	4.474e-07	-0.015	0.0028	1.191e-07	0.669942	0.502895	not_sig	0.5156	not_sig
LDL	1	155106054	A	G	rs4390169	14.0655	8.6e-15	0.4817	-0.011	0.0013	-0.0103	0.0017	6.821e-10	-0.0129	0.0019	1.205e-11	1.02708	0.304385	not_sig	0.6277	not_sig
TC	1	155123837	C	G	rs6676150	11.3763	4.2e-12	0.6391	0.0092	0.0013	0.0096	0.0017	6.642e-09	0.0088	0.0019	2.341e-06	0.316195	0.751854	not_sig	0.4463	not_sig
nonHDL	1	155178782	A	T	rs760077	9.55493	2.79e-10	0.6264	0.0082	0.0016	0.0067	0.0022	0.002963	0.0108	0.0021	2.158e-07	-1.35385	0.175783	not_sig	0.09937	not_sig
HDL	1	156705822	T	C	rs12161427	10.4896	3.24e-11	0.6885	-0.011	0.0014	-0.0096	0.0018	4.204e-08	-0.0134	0.002	1.962e-11	1.42397	0.154456	not_sig	0.2511	not_sig
LDL	1	158586966	A	T	rs2022003	12.0448	9.02e-13	0.2928	0.0106	0.0014	0.0108	0.0018	1.567e-09	0.0104	0.002	3.509e-07	0.14972	0.880986	not_sig	0.224	not_sig
nonHDL	1	158586966	A	T	rs2022003	11.5468	2.84e-12	0.3013	0.0124	0.0016	0.0135	0.0023	3.178e-09	0.0116	0.0021	4.233e-08	0.612662	0.5401	not_sig	0.3695	not_sig
TC	1	158607935	T	G	rs857725	15.037	9.18e-16	0.2766	0.0122	0.0014	0.0119	0.0018	4.184e-11	0.0127	0.002	2.623e-10	-0.299602	0.764481	not_sig	0.3169	not_sig
HDL	1	161078909	T	C	rs4656984	9.30417	4.96e-10	0.6333	0.0105	0.0014	0.0117	0.0018	1.132e-10	0.0092	0.002	5.178e-06	0.936819	0.348851	not_sig	0.824	not_sig
LDL	1	161531340	A	G	rs115383270	9.03197	9.29e-10	0.9288	-0.019	0.0027	-0.0154	0.0034	7.087e-06	-0.0235	0.004	4.456e-09	1.55385	0.12022	not_sig	0.1518	not_sig
TC	1	161531340	A	G	rs115383270	17.0154	9.65e-18	0.9288	-0.025	0.0026	-0.0194	0.0033	6.989e-09	-0.032	0.0038	6.162e-17	2.52268	0.0116464	not_sig	0.0163	not_sig
HDL	1	161614490	T	G	rs1771582	8.18593	6.52e-09	0.5857	0.01	0.0015	0.01	0.0018	7.156e-08	0.0125	0.0023	9.272e-08	-0.862907	0.388188	not_sig	0.8989	not_sig
nonHDL	1	172357433	T	C	rs12404665	10.087	8.18e-11	0.5779	-0.011	0.0015	-0.0085	0.0022	0.0001386	-0.0134	0.0021	8.223e-11	1.61802	0.105658	not_sig	0.2637	not_sig
HDL	1	172361977	T	G	rs9425300	12.5086	3.1e-13	0.5663	0.0113	0.0013	0.0099	0.0017	3.692e-09	0.0139	0.0019	2.502e-13	-1.58193	0.113666	not_sig	0.2863	not_sig
logTG	1	172361977	T	G	rs9425300	20.5005	3.16e-21	0.5631	-0.013	0.0013	-0.0102	0.0017	9.383e-10	-0.0163	0.0019	8.536e-18	2.40672	0.0160963	not_sig	0.02156	not_sig
HDL	1	174168805	T	G	rs4442420	7.95798	1.1e-08	0.6056	0.0094	0.0013	0.0077	0.0017	6.4e-06	0.0113	0.0019	3.541e-09	-1.42373	0.154524	not_sig	0.456	not_sig
nonHDL	1	174538958	C	G	rs7414200	8.32294	4.75e-09	0.2486	0.0122	0.0018	0.0096	0.0026	0.0001933	0.0143	0.0024	1.41e-09	-1.33398	0.182209	not_sig	0.3322	not_sig
HDL	1	177885762	A	G	rs630372	10.0628	8.65e-11	0.7621	0.0117	0.0015	0.0074	0.0019	0.0001184	0.0161	0.0022	1.306e-13	-3.01757	0.0025481	not_sig	0.07014	not_sig
LDL	1	177938437	A	G	rs6682862	11.054	8.83e-12	0.791	0.0121	0.0016	0.0123	0.0021	7.16e-09	0.0129	0.0024	7.583e-08	-0.189482	0.849715	not_sig	0.5957	not_sig
TC	1	177938437	A	G	rs6682862	7.50843	3.1e-08	0.7935	0.0092	0.0016	0.009	0.0021	1.294e-05	0.0103	0.0023	9.333e-06	-0.420616	0.674035	not_sig	0.9003	not_sig
HDL	1	178533832	T	G	rs4077194	40.3554	4.41e-41	0.4977	0.0183	0.0012	0.0178	0.0016	6.349e-29	0.0203	0.0018	1.181e-29	-1.04666	0.295256	not_sig	0.3522	not_sig
HDL	1	182150978	A	C	rs1689797	65.0175	9.6e-66	0.6866	0.0242	0.0013	0.0261	0.0017	1.984e-52	0.0239	0.0019	5.584e-35	0.870059	0.384268	not_sig	0.2404	not_sig
LDL	1	182165484	A	G	rs1689801	17.6339	2.32e-18	0.6863	-0.013	0.0013	-0.0125	0.0018	1.156e-12	-0.0148	0.002	1.405e-13	0.860887	0.3893	not_sig	0.65	not_sig
nonHDL	1	182165484	A	G	rs1689801	15.4603	3.46e-16	0.6877	-0.015	0.0016	-0.0128	0.0023	1.338e-08	-0.0155	0.0021	1.599e-13	0.870625	0.383959	not_sig	0.3042	not_sig
LDL	1	183065406	A	G	rs7525917	15.9652	1.08e-16	0.5635	0.0115	0.0013	0.0129	0.0017	8.373e-15	0.0106	0.0019	3.049e-08	0.908567	0.363579	not_sig	0.2017	not_sig
TC	1	183112041	C	G	rs3359	18.1616	6.89e-19	0.4354	-0.012	0.0012	-0.0117	0.0015	3.661e-14	-0.0128	0.0017	1.844e-13	0.488908	0.624907	not_sig	0.9073	not_sig
nonHDL	1	183115018	T	C	rs10911263	10.5921	2.56e-11	0.4355	-0.011	0.0015	-0.0125	0.0022	6.315e-09	-0.0089	0.002	8.883e-06	-1.21599	0.22399	not_sig	0.3237	not_sig
HDL	1	184035116	A	G	rs1952256	7.57024	2.69e-08	0.3487	-0.008	0.0013	-0.0085	0.0017	4.128e-07	-0.0074	0.0019	0.0001044	-0.43503	0.663541	not_sig	0.952	not_sig
logTG	1	184865132	A	T	rs115276619	15.3126	4.87e-16	0.9847	0.0502	0.0055	0.0527	0.0073	5.734e-13	0.0496	0.008	4.938e-10	0.287932	0.773399	not_sig	0.6296	not_sig
LDL	1	197129981	T	C	rs12137359	7.87317	1.34e-08	0.7796	-0.011	0.0017	-0.0084	0.0022	0.000133	-0.0146	0.0025	5.039e-09	1.87502	0.0607902	not_sig	0.2292	not_sig
TC	1	197159347	A	G	rs10922179	9.52815	2.96e-10	0.7544	-0.012	0.0016	-0.0098	0.002	1.17e-06	-0.014	0.0023	5.81e-10	1.38852	0.16498	not_sig	0.4187	not_sig
nonHDL	1	198990494	A	G	rs17625587	7.97036	1.07e-08	0.7447	0.0101	0.0017	0.0097	0.0024	5.464e-05	0.0109	0.0023	1.453e-06	-0.362543	0.716946	not_sig	0.3692	not_sig
LDL	1	199010721	T	C	rs1434282	8.58944	2.57e-09	0.2685	-0.01	0.0014	-0.0089	0.0019	2.684e-06	-0.0115	0.0021	5.301e-08	0.924646	0.35515	not_sig	0.3897	not_sig
TC	1	199010721	T	C	rs1434282	9.58602	2.59e-10	0.2664	-0.009	0.0014	-0.0074	0.0018	2.651e-05	-0.0105	0.002	7.949e-08	1.16096	0.245659	not_sig	0.2233	not_sig
HDL	1	200049302	A	T	rs6658424	8.12712	7.46e-09	0.7206	0.0092	0.0014	0.0096	0.0018	6.827e-08	0.0102	0.002	4.388e-07	-0.224837	0.822106	not_sig	0.5245	not_sig
logTG	1	202184600	T	C	rs6686987	7.89963	1.26e-08	0.6205	0.0091	0.0013	0.0085	0.0017	3.516e-07	0.0099	0.0019	1.681e-07	-0.552363	0.5807	not_sig	0.7974	not_sig
HDL	1	202197659	T	C	rs12143329	10.3971	4.01e-11	0.6254	-0.01	0.0013	-0.0105	0.0017	3.459e-10	-0.0074	0.0019	0.0001003	-1.22599	0.220201	not_sig	0.2372	not_sig
TC	1	203255493	A	T	rs2486942	7.36119	4.35e-08	0.4207	-0.008	0.0012	-0.0068	0.0016	1.328e-05	-0.0086	0.0017	7.062e-07	0.776981	0.43717	not_sig	0.3565	not_sig
logTG	1	203517292	A	G	rs2821226	16.1797	6.61e-17	0.5263	-0.013	0.0014	-0.0117	0.0018	4.771e-11	-0.0164	0.0021	1.973e-15	1.70925	0.0874044	not_sig	0.003506	not_sig
HDL	1	203518873	A	C	rs13303359	11.5601	2.75e-12	0.5145	0.0118	0.0014	0.0095	0.0018	8.86e-08	0.0135	0.002	3.326e-11	-1.49891	0.133897	not_sig	0.01732	not_sig
logTG	1	205070573	A	G	rs11240358	18.7173	1.92e-19	0.5884	-0.011	0.0013	-0.0109	0.0017	1.246e-10	-0.0134	0.0019	5.051e-12	0.986363	0.323955	not_sig	0.3406	not_sig
HDL	1	205099959	A	C	rs3862948	13.5672	2.71e-14	0.7405	0.0127	0.0014	0.0119	0.0019	2.206e-10	0.014	0.0021	5.186e-11	-0.747686	0.45465	not_sig	0.3274	not_sig
nonHDL	1	205114873	C	G	rs12048743	9.43514	3.67e-10	0.4769	0.0101	0.0015	0.0096	0.0022	1.81e-05	0.0107	0.0021	1.972e-07	-0.363229	0.716434	not_sig	0.6864	not_sig
HDL	1	205677148	A	G	rs3747973	25.271	5.36e-26	0.5581	0.0149	0.0013	0.015	0.0016	3.934e-20	0.0153	0.0018	1.562e-16	-0.125599	0.900049	not_sig	0.8679	not_sig
HDL	1	209849714	T	TA	rs397982763	7.78605	1.64e-08	0.1631	0.0175	0.0024	0.0163	0.0031	9.806e-08	0.017	0.0035	1.075e-06	-0.150956	0.88001	not_sig	0.7651	not_sig
HDL	1	212537553	A	G	rs3767861	9.2753	5.31e-10	0.6379	-0.01	0.0013	-0.0099	0.0017	8.637e-09	-0.0116	0.0019	2.039e-09	0.672319	0.501381	not_sig	0.368	not_sig
HDL	1	219664627	A	G	rs59770119	28.6077	2.47e-29	0.4628	0.0159	0.0013	0.017	0.0016	5.503e-25	0.015	0.0019	5.902e-16	0.811782	0.416917	not_sig	0.5389	not_sig
nonHDL	1	219673705	A	G	rs2820468	8.93357	1.17e-09	0.6623	0.0099	0.0016	0.0086	0.0022	0.0001082	0.0112	0.0021	9.233e-08	-0.858542	0.390593	not_sig	0.1512	not_sig
logTG	1	219734960	A	C	rs2820441	40.9361	1.16e-41	0.3083	-0.019	0.0014	-0.019	0.0018	1.197e-26	-0.0183	0.002	7.197e-20	-0.261688	0.793562	not_sig	0.9818	not_sig
HDL	1	220970028	A	G	rs2642438	76.0582	8.75e-77	0.7232	0.028	0.0014	0.0285	0.0018	2.354e-55	0.0291	0.0021	5.356e-45	-0.218717	0.82687	not_sig	0.6408	not_sig
LDL	1	220970028	A	G	rs2642438	80.8545	1.4e-81	0.7212	0.0286	0.0014	0.0267	0.0019	7.091e-47	0.0315	0.0021	5.097e-50	-1.70704	0.0878148	not_sig	0.458	not_sig
logTG	1	220970028	A	G	rs2642438	24.3417	4.55e-25	0.7214	-0.016	0.0014	-0.0135	0.0018	1.671e-13	-0.0181	0.0021	4.053e-18	1.67288	0.0943501	not_sig	0.2823	not_sig
nonHDL	1	220970028	A	G	rs2642438	34.3539	4.43e-35	0.7203	0.0223	0.0017	0.0236	0.0024	7.63e-23	0.0221	0.0022	3.001e-23	0.462692	0.643585	not_sig	0.7856	not_sig
TC	1	220970028	A	G	rs2642438	91.6355	2.31e-92	0.724	0.0294	0.0014	0.0263	0.0018	7.831e-51	0.0342	0.002	5e-68	-2.95857	0.00309071	not_sig	0.1322	not_sig
HDL	1	224544746	A	G	rs56105022	11.0401	9.12e-12	0.9663	0.0304	0.0038	0.0323	0.005	1.132e-10	0.0292	0.0057	2.752e-07	0.41223	0.680171	not_sig	0.6832	not_sig
LDL	1	224545410	T	C	rs11803981	9.84783	1.42e-10	0.2485	-0.011	0.0016	-0.0115	0.002	9.514e-09	-0.0115	0.0023	5.11e-07	0	1	not_sig	0.7241	not_sig
TC	1	224549524	T	C	rs7519734	17.0767	8.38e-18	0.2488	-0.014	0.0015	-0.0133	0.0019	8.46e-12	-0.0154	0.0022	2.456e-12	0.727943	0.466648	not_sig	0.6435	not_sig
nonHDL	1	224646328	T	C	rs6663522	9.31018	4.9e-10	0.7707	0.0127	0.0019	0.0127	0.0027	3.518e-06	0.0133	0.0025	7.288e-08	-0.163756	0.869923	not_sig	0.639	not_sig
logTG	1	228056868	T	C	rs6690181	8.65506	2.21e-09	0.4336	-0.008	0.0014	-0.0084	0.0018	4.623e-06	-0.0077	0.0021	0.0003333	-0.254569	0.799056	not_sig	0.1108	not_sig
HDL	1	230294715	A	C	rs4846913	284.424	3.77e-285	0.4467	-0.048	0.0013	-0.0482	0.0017	5.86e-185	-0.0489	0.0019	2.72e-146	0.276837	0.781905	not_sig	0.0978	not_sig
logTG	1	230294715	A	C	rs4846913	224.277	5.29e-225	0.4397	0.0424	0.0013	0.0418	0.0017	1.17e-137	0.0434	0.0019	1.68e-114	-0.631272	0.527863	not_sig	0.8855	not_sig
nonHDL	1	230307222	T	G	rs4846923	21.8635	1.37e-22	0.6899	-0.015	0.0016	-0.0121	0.0023	1.646e-07	-0.0161	0.0022	1.452e-13	1.26216	0.206891	not_sig	0.6565	not_sig
HDL	1	230796872	CAT	C	rs145957520	7.65395	2.22e-08	0.0425	-0.025	0.0037	-0.0254	0.0047	6.611e-08	-0.0251	0.0056	6.991e-06	-0.0413711	0.967	not_sig	0.4967	not_sig
logTG	1	230823363	A	G	rs75054794	10.1296	7.42e-11	0.05	0.0224	0.0031	0.0203	0.004	3.544e-07	0.028	0.0045	5.981e-10	-1.28644	0.198291	not_sig	0.2438	not_sig
logTG	1	234848712	A	G	rs508293	8.16854	6.78e-09	0.4403	-0.009	0.0013	-0.0076	0.0017	9.844e-06	-0.01	0.0019	1.349e-07	0.946908	0.343686	not_sig	0.1154	not_sig
HDL	1	234852760	T	C	rs553427	28.7807	1.66e-29	0.4373	-0.016	0.0013	-0.0197	0.0017	2.925e-32	-0.011	0.0019	2.761e-09	-3.44069	0.000580235	not_sig	1.943e-05	sig
LDL	1	234853268	A	C	rs557933	185.541	2.88e-186	0.5604	0.0391	0.0013	0.04	0.0017	2.69e-122	0.0392	0.0019	2.63e-94	0.316023	0.751985	not_sig	0.3275	not_sig
TC	1	234853268	A	C	rs557933	227.256	5.55e-228	0.5653	0.0414	0.0012	0.0437	0.0016	4.49e-165	0.04	0.0018	9.4e-115	1.54813	0.121591	not_sig	0.01248	not_sig
nonHDL	1	234853406	A	G	rs558971	140.664	2.17e-141	0.5573	0.0395	0.0015	0.043	0.0021	3.1e-89	0.0382	0.002	1.513e-81	1.66227	0.0964582	not_sig	0.06187	not_sig
LDL	1	246892695	A	G	rs12121187	8.8618	1.37e-09	0.8844	-0.015	0.0021	-0.014	0.0027	1.765e-07	-0.0158	0.0031	4.143e-07	0.440965	0.659238	not_sig	0.4249	not_sig
HDL	2	239597	C	G	rs6710091	23.533	2.93e-24	0.3307	0.0154	0.0013	0.0141	0.0017	2.954e-16	0.0182	0.0019	7.189e-21	-1.62147	0.104916	not_sig	0.2726	not_sig
logTG	2	256116	T	G	rs62114538	11.2415	5.73e-12	0.6481	0.0107	0.0013	0.0095	0.0017	1.794e-08	0.0119	0.0019	4.994e-10	-0.946908	0.343686	not_sig	0.6075	not_sig
nonHDL	2	3636478	T	G	rs56236159	7.36936	4.27e-08	0.2532	0.0122	0.002	0.0119	0.0028	2.541e-05	0.0126	0.0027	4.056e-06	-0.180733	0.856577	not_sig	0.943	not_sig
logTG	2	3640142	T	C	rs6542680	17.3979	4e-18	0.2425	-0.016	0.0016	-0.0154	0.0021	8.939e-14	-0.0166	0.0024	2.337e-12	0.378501	0.705058	not_sig	0.8484	not_sig
TC	2	3640142	T	C	rs6542680	23.0452	9.01e-24	0.2671	0.0168	0.0015	0.0143	0.0019	1.122e-13	0.02	0.0022	3.723e-20	-1.97585	0.0481722	not_sig	0.1407	not_sig
HDL	2	3642361	T	C	rs3820897	36.1041	7.87e-37	0.7589	-0.022	0.0016	-0.0212	0.0021	6.327e-25	-0.0243	0.0024	1.621e-24	0.980109	0.327032	not_sig	0.5554	not_sig
LDL	2	3642361	T	C	rs3820897	20.4299	3.72e-21	0.7594	-0.016	0.0016	-0.0151	0.0021	2.164e-13	-0.0185	0.0024	1.07e-14	1.07373	0.282943	not_sig	0.3685	not_sig
LDL	2	8718961	A	G	rs11679703	8.85901	1.38e-09	0.7165	0.0104	0.0014	0.0117	0.0019	2.916e-10	0.0086	0.0021	4.117e-05	1.10246	0.270261	not_sig	0.6422	not_sig
TC	2	8723673	A	G	rs4669294	10.5283	2.96e-11	0.7056	0.0109	0.0014	0.0123	0.0018	4.803e-12	0.0082	0.002	2.751e-05	1.53546	0.124671	not_sig	0.2373	not_sig
LDL	2	16890382	C	G	rs798383	7.4953	3.2e-08	0.2172	-0.005	0.0018	-0.0082	0.0023	0.0002819	0.0002	0.0028	0.9281	-2.33449	0.01957	not_sig	0.2501	not_sig
LDL	2	17967586	A	G	rs750772	14.7433	1.81e-15	0.1466	-0.018	0.0019	-0.0162	0.0025	1.057e-10	-0.02	0.0029	7.608e-12	0.999511	0.317547	not_sig	0.7266	not_sig
nonHDL	2	17967586	A	G	rs750772	12.0216	9.51e-13	0.1232	-0.018	0.0023	-0.0188	0.0034	3.227e-08	-0.0164	0.0031	1.443e-07	-0.523846	0.600385	not_sig	0.187	not_sig
TC	2	17967586	A	G	rs750772	16.2233	5.98e-17	0.1442	-0.018	0.0019	-0.0174	0.0024	2.216e-13	-0.0185	0.0027	7.947e-12	0.306836	0.758968	not_sig	0.7184	not_sig
LDL	2	19693384	A	G	rs759257847	20.2785	5.27e-21	0.0002	0.5752	0.0916	0.3435	0.14	0.01414	0.7176	0.1203	2.471e-09	-2.04107	0.041244	not_sig	0.1187	not_sig
nonHDL	2	19693384	A	G	rs759257847	14.7853	1.64e-15	0.0002	0.4422	0.0884	-0.0588	0.1536	0.7019	0.5588	0.1227	5.271e-06	-3.15469	0.00160666	not_sig	0.746	not_sig
TC	2	19693384	A	G	rs759257847	11.0691	8.53e-12	0.0002	0.381	0.078	0.1871	0.1234	0.1295	0.5106	0.1052	1.199e-06	-2.01021	0.0444091	not_sig	0.07549	not_sig
LDL	2	20370641	A	C	rs79279183	36.3299	4.68e-37	0.5027	-0.018	0.0013	-0.0165	0.0017	1.608e-22	-0.0213	0.002	1.509e-25	1.8416	0.0655334	not_sig	0.2069	not_sig
nonHDL	2	20371380	A	G	rs907866	44.0975	7.99e-45	0.5454	0.0225	0.0015	0.0206	0.0021	2.939e-22	0.0242	0.002	1.422e-34	-1.2467	0.212506	not_sig	0.2462	not_sig
TC	2	20371380	A	G	rs907866	91.1487	7.1e-92	0.5454	0.0259	0.0012	0.0261	0.0015	7.637e-64	0.0275	0.0017	1.166e-56	-0.622247	0.533779	not_sig	0.6348	not_sig
logTG	2	20371772	A	G	rs1107850	41.0355	9.21e-42	0.5129	0.0181	0.0012	0.0169	0.0016	1.049e-25	0.0195	0.0018	1.983e-26	-1.08595	0.2775	not_sig	0.415	not_sig
HDL	2	20372409	A	G	rs2090034	25.3153	4.84e-26	0.5254	0.0137	0.0012	0.0169	0.0016	2.245e-26	0.0118	0.0018	9.032e-11	2.13519	0.0327456	not_sig	0.0283	not_sig
HDL	2	21231524	A	G	rs676210	292.715	1.93e-293	0.7397	-0.057	0.0015	-0.0541	0.0019	1.17e-169	-0.0633	0.0022	1.48e-177	3.19099	0.00141784	not_sig	0.1016	not_sig
logTG	2	21231524	A	G	rs676210	397.368	0	0.7402	0.0642	0.0015	0.0608	0.0019	3.69e-218	0.0731	0.0022	1.15e-241	-4.25616	2.07963e-05	sig	0.005484	not_sig
LDL	2	21267461	A	G	rs934197	970.067	0	0.6901	-0.095	0.0014	-0.0916	0.0018	0	-0.1033	0.002	0	4.3793	1.19064e-05	sig	0.07779	not_sig
nonHDL	2	21267461	A	G	rs934197	669.651	0	0.6888	-0.093	0.0016	-0.0901	0.0024	0	-0.0975	0.0022	0	2.28262	0.022453	not_sig	0.01874	not_sig
TC	2	21267461	A	G	rs934197	795.345	0	0.6932	-0.084	0.0013	-0.0802	0.0017	0	-0.091	0.0019	0	4.26863	1.96674e-05	sig	0.02758	not_sig
logTG	2	21778585	A	G	rs114040256	8.14547	7.15e-09	0.0095	-0.051	0.0078	-0.0627	0.0104	1.507e-09	-0.0349	0.0108	0.001251	-1.86515	0.0621602	not_sig	0.3872	not_sig
nonHDL	2	21818551	A	G	rs147821144	33.7075	1.96e-34	0.0113	0.3834	0.0278	0.4169	0.0263	1.566e-56	0.3765	0.0294	1.639e-37	1.02854	0.303698	not_sig	0.1962	not_sig
TC	2	21818551	A	G	rs147821144	33.1228	7.54e-34	0.0125	0.2897	0.0208	0.3468	0.02	2.465e-67	0.3246	0.0219	8.848e-50	0.754287	0.450677	not_sig	0.2125	not_sig
LDL	2	21942500	C	G	rs191450029	27.2177	6.06e-28	0.9997	-0.799	0.0744	-0.6367	0.1169	5.081e-08	-0.7135	0.1041	7.083e-12	0.494129	0.621215	not_sig	0.1497	not_sig
HDL	2	21979516	A	G	rs116500366	8.2091	6.18e-09	0.9762	-0.015	0.0044	-0.021	0.0057	0.0002038	-0.0072	0.0068	0.2899	-1.56804	0.116871	not_sig	0.2079	not_sig
nonHDL	2	22445083	T	C	rs148868229	15.3481	4.49e-16	0.0086	0.2867	0.0295	0.315	0.0279	1.426e-29	0.2619	0.0314	6.882e-17	1.26954	0.204247	not_sig	0.1481	not_sig
TC	2	22445083	T	C	rs148868229	17.7529	1.77e-18	0.01	0.2323	0.0222	0.2708	0.0211	1.352e-37	0.2478	0.0233	1.97e-26	0.737316	0.46093	not_sig	0.1812	not_sig
LDL	2	22501253	T	G	rs4665495	8.01735	9.61e-09	0.4782	-0.0005	0.0013	-0.0012	0.0017	0.4776	0	0.0019	0.9819	-0.474035	0.635475	not_sig	0.3789	not_sig
LDL	2	23015285	T	C	rs11889451	11.1615	6.89e-12	0.7578	0.0058	0.0016	0.0096	0.0021	6.677e-06	0.0008	0.0025	0.7538	2.71433	0.00664107	not_sig	0.2309	not_sig
nonHDL	2	23117602	T	C	rs557901815	12.6905	2.04e-13	0.0071	0.3928	0.0484	0.3937	0.0419	5.365e-21	0.3938	0.0494	1.631e-15	-0.00155032	0.998763	not_sig	0.5249	not_sig
TC	2	23117602	T	C	rs557901815	14.4586	3.48e-15	0.0067	0.3009	0.0351	0.3436	0.0319	4.734e-27	0.3343	0.0356	5.553e-21	0.196049	0.844572	not_sig	0.4086	not_sig
TC	2	23882347	A	G	rs749331	8.3137	4.86e-09	0.5409	0.003	0.0013	0.0021	0.0016	0.1902	0.0035	0.0018	0.0544	-0.585778	0.558024	not_sig	0.7076	not_sig
LDL	2	24400769	A	C	rs55661701	13.1563	6.98e-14	0.2406	0.0098	0.0015	0.0099	0.002	4.965e-07	0.0105	0.0022	2.341e-06	-0.203243	0.838945	not_sig	0.4721	not_sig
TC	2	24726602	G	GT	rs72387328	13.2159	6.08e-14	0.655	0.0123	0.0016	0.0148	0.002	9.703e-14	0.0061	0.0024	0.01053	2.80596	0.00501667	not_sig	0.03202	not_sig
logTG	2	25592918	T	C	rs11903847	8.09053	8.12e-09	0.661	-0.008	0.0014	-0.0072	0.0018	5.494e-05	-0.0093	0.002	3.948e-06	0.785064	0.432416	not_sig	0.3323	not_sig
TC	2	26256840	A	C	rs4665299	10.4948	3.2e-11	0.8009	-0.01	0.0015	-0.0098	0.002	6.515e-07	-0.008	0.0022	0.0003054	-0.610062	0.541821	not_sig	0.8287	not_sig
LDL	2	26358156	A	G	rs142787485	8.97825	1.05e-09	0.0351	-0.028	0.0039	-0.0305	0.0052	3.808e-09	-0.0275	0.0055	6.511e-07	-0.399192	0.689752	not_sig	0.3951	not_sig
nonHDL	2	26358156	A	G	rs142787485	8.71061	1.95e-09	0.0362	-0.031	0.0044	-0.0333	0.0066	4.497e-07	-0.03	0.0059	3.004e-07	-0.374359	0.708137	not_sig	0.824	not_sig
HDL	2	26571411	A	G	rs13432533	8.41549	3.84e-09	0.465	0.009	0.0013	0.0086	0.0017	3.161e-07	0.0099	0.0019	2.71e-07	-0.514126	0.607164	not_sig	0.5324	not_sig
TC	2	26911509	A	C	rs1275984	15.9074	1.24e-16	0.5585	0.0105	0.0012	0.0113	0.0016	1.727e-12	0.0108	0.0018	2.55e-09	0.209207	0.834287	not_sig	0.8123	not_sig
LDL	2	26923568	T	C	rs1275979	9.88191	1.31e-10	0.5693	0.0095	0.0013	0.0088	0.0017	1.939e-07	0.0113	0.002	6.704e-09	-0.959168	0.337474	not_sig	0.1849	not_sig
logTG	2	26924018	C	G	rs57035494	20.9771	1.05e-21	0.0371	-0.038	0.0035	-0.036	0.0046	9.963e-15	-0.0412	0.0051	1.181e-15	0.761598	0.4463	not_sig	0.1533	not_sig
nonHDL	2	26929282	T	G	rs13394970	13.2853	5.18e-14	0.5627	0.0123	0.0015	0.0122	0.0022	3.093e-08	0.0122	0.002	2.678e-09	0	1	not_sig	0.9654	not_sig
HDL	2	27730940	T	C	rs1260326	7.6653	2.16e-08	0.6158	0.004	0.0013	0.0014	0.0017	0.4216	0.0085	0.0019	9.148e-06	-2.80792	0.00498628	not_sig	0.05748	not_sig
LDL	2	27730940	T	C	rs1260326	113.318	4.8e-114	0.6161	-0.031	0.0013	-0.0276	0.0017	1.818e-59	-0.0358	0.0019	6.63e-77	3.23924	0.00119849	not_sig	0.005866	not_sig
logTG	2	27730940	T	C	rs1260326	1472.16	0	0.6156	-0.11	0.0013	-0.1094	0.0017	0	-0.1143	0.0019	0	1.93327	0.0532028	not_sig	0.8369	not_sig
nonHDL	2	27730940	T	C	rs1260326	299.009	9.79e-300	0.6138	-0.059	0.0015	-0.0622	0.0023	2.71e-166	-0.0603	0.0021	5.53e-185	-0.612662	0.5401	not_sig	0.4918	not_sig
TC	2	27730940	T	C	rs1260326	460.508	0	0.6156	-0.06	0.0013	-0.0626	0.0017	0	-0.0586	0.0019	2.3e-219	-1.58098	0.113884	not_sig	0.6169	not_sig
TC	2	29133905	C	G	rs34588907	7.44981	3.55e-08	0.211	0.0086	0.0016	0.0106	0.002	2.183e-07	0.0072	0.0023	0.001588	1.12404	0.260997	not_sig	0.07285	not_sig
HDL	2	30480750	T	G	rs13389106	9.0493	8.93e-10	0.2039	-0.012	0.0015	-0.0113	0.002	1.01e-08	-0.0115	0.0023	3.363e-07	0.0661595	0.947251	not_sig	0.7089	not_sig
TC	2	32182528	T	C	rs62142080	7.66521	2.16e-08	0.3996	-0.008	0.0013	-0.0108	0.0016	2.58e-11	-0.0068	0.0018	0.0001359	-1.67365	0.0941989	not_sig	0.09076	not_sig
HDL	2	42590122	C	G	rs3755303	8.02235	9.5e-09	0.3303	0.0091	0.0013	0.008	0.0017	3.323e-06	0.0119	0.002	1.084e-09	-1.498	0.134132	not_sig	0.06815	not_sig
nonHDL	2	43455654	T	C	rs745763	19.2452	5.69e-20	0.1747	0.0196	0.002	0.0172	0.0028	6.427e-10	0.0202	0.0027	2.522e-14	-0.774572	0.438593	not_sig	0.618	not_sig
logTG	2	43490619	A	T	rs58839393	12.465	3.43e-13	0.1726	0.0143	0.0017	0.0136	0.0023	2.043e-09	0.0139	0.0025	2.578e-08	-0.0888339	0.929214	not_sig	0.9324	not_sig
LDL	2	43561161	A	C	rs12468394	21.6324	2.33e-22	0.5126	-0.014	0.0013	-0.0112	0.0017	2.208e-11	-0.0163	0.0019	8.174e-18	2.01465	0.0439415	not_sig	0.1298	not_sig
TC	2	43561161	A	C	rs12468394	19.5885	2.58e-20	0.5183	-0.013	0.0012	-0.0106	0.0016	1.095e-11	-0.0143	0.0017	2.385e-16	1.59713	0.110237	not_sig	0.3621	not_sig
LDL	2	44074431	T	C	rs4245791	487.896	0	0.2963	0.069	0.0014	0.0628	0.0018	4.06e-257	0.0794	0.0021	5.2e-308	-6.04429	1.50066e-09	sig	0.0004061	not_sig
logTG	2	44074431	T	C	rs4245791	9.01683	9.62e-10	0.2962	0.0103	0.0014	0.0097	0.0018	7.804e-08	0.0117	0.0021	1.905e-08	-0.727341	0.467017	not_sig	0.4364	not_sig
nonHDL	2	44074431	T	C	rs4245791	350.771	0	0.2978	0.07	0.0017	0.0602	0.0025	2.23e-129	0.0789	0.0023	1.81e-261	-5.52832	3.23307e-08	sig	2.867e-05	sig
TC	2	44074431	T	C	rs4245791	435.293	0	0.297	0.064	0.0014	0.0563	0.0018	3.79e-218	0.076	0.002	7.81e-308	-7.3777	1.6105e-13	sig	2.539e-05	sig
nonHDL	2	44663206	A	T	rs556971810	19.1055	7.84e-20	0.9895	0.0933	0.0092	0.1002	0.0135	9.261e-14	0.097	0.0121	1.219e-15	0.177266	0.859299	not_sig	0.9806	not_sig
TC	2	44663206	A	T	rs556971810	25.5414	2.87e-26	0.9901	0.0945	0.008	0.0934	0.0106	9.655e-19	0.1059	0.0112	3.701e-21	-0.816849	0.414015	not_sig	0.4425	not_sig
LDL	2	44663302	T	C	rs140879085	33.3622	4.34e-34	0.9897	0.0957	0.0073	0.095	0.0099	5.945e-22	0.1038	0.01	4.486e-25	-0.62986	0.528786	not_sig	0.1413	not_sig
LDL	2	46166321	A	G	rs12712955	15.919	1.21e-16	0.4755	-0.012	0.0013	-0.011	0.0017	4.31e-11	-0.0131	0.0019	4.568e-12	0.829561	0.406787	not_sig	0.2183	not_sig
nonHDL	2	46166321	A	G	rs12712955	7.6956	2.02e-08	0.4768	-0.01	0.0015	-0.0103	0.0022	3.035e-06	-0.01	0.002	8.558e-07	-0.101332	0.919287	not_sig	0.7561	not_sig
TC	2	46166321	A	G	rs12712955	15.9556	1.11e-16	0.4765	-0.012	0.0012	-0.0106	0.0016	6.844e-11	-0.0127	0.0018	1.893e-12	0.878668	0.379582	not_sig	0.1954	not_sig
HDL	2	48962291	T	G	rs17326656	17.52	3.02e-18	0.7735	0.0152	0.0015	0.005	0.002	0.01262	0.0265	0.0023	1.681e-31	-7.11215	1.14253e-12	sig	1.462e-12	sig
logTG	2	48962291	T	G	rs17326656	10.1458	7.15e-11	0.7736	-0.012	0.0015	-0.0026	0.002	0.1875	-0.0228	0.0022	2.711e-24	6.83412	8.25086e-12	sig	1.301e-09	sig
HDL	2	54033988	C	G	rs2253760	11.5563	2.78e-12	0.43	0.0105	0.0013	0.0089	0.0016	3.875e-08	0.0126	0.0018	6.513e-12	-1.54906	0.121368	not_sig	0.1681	not_sig
HDL	2	58772377	A	T	rs10460509	12.6596	2.19e-13	0.5324	-0.01	0.0013	-0.0086	0.0016	1.247e-07	-0.0119	0.0018	8.065e-11	1.38159	0.167097	not_sig	0.1663	not_sig
logTG	2	58950363	T	G	rs17615494	9.71077	1.95e-10	0.7128	-0.01	0.0014	-0.0099	0.0018	3.938e-08	-0.0108	0.002	1.219e-07	0.336456	0.736527	not_sig	0.9738	not_sig
HDL	2	59293596	A	C	rs35603314	7.31391	4.85e-08	0.6623	-0.009	0.0014	-0.0083	0.0018	2.597e-06	-0.0103	0.002	2.104e-07	0.749456	0.453583	not_sig	0.3539	not_sig
TC	2	61563408	A	G	rs921153	8.40673	3.92e-09	0.8092	0.0107	0.0016	0.0084	0.0021	5.256e-05	0.0125	0.0023	6.062e-08	-1.32656	0.184655	not_sig	0.2181	not_sig
nonHDL	2	61577435	T	C	rs2166720	7.44205	3.61e-08	0.1937	-0.012	0.002	-0.0091	0.0028	0.0009609	-0.0147	0.0026	1.974e-08	1.47186	0.141058	not_sig	0.2953	not_sig
logTG	2	61735446	T	C	rs766448	10.3784	4.18e-11	0.5491	0.01	0.0013	0.0091	0.0016	2.311e-08	0.0116	0.0018	3.975e-10	-1.04418	0.2964	not_sig	0.2547	not_sig
LDL	2	62939397	A	G	rs360804	53.2628	5.46e-54	0.6953	0.0225	0.0014	0.0184	0.0018	9.735e-25	0.029	0.002	1.439e-46	-3.96757	7.26101e-05	sig	0.0003603	not_sig
nonHDL	2	62959308	A	T	rs189671	42.6044	2.49e-43	0.6909	0.023	0.0016	0.019	0.0023	4.56e-17	0.028	0.0021	3.852e-40	-2.90208	0.00370688	not_sig	0.003929	not_sig
TC	2	62978981	T	G	rs78784525	41.8865	1.3e-42	0.6848	0.0188	0.0013	0.0155	0.0017	1.934e-20	0.0253	0.0019	7.679e-42	-3.87339	0.000107332	not_sig	0.001026	not_sig
nonHDL	2	64913045	C	G	rs954680	12.2516	5.6e-13	0.7058	0.0124	0.0017	0.0111	0.0024	4.781e-06	0.0135	0.0022	1.58e-09	-0.740308	0.459113	not_sig	0.4343	not_sig
LDL	2	64923808	T	C	rs1477034	12.2149	6.1e-13	0.2841	-0.012	0.0014	-0.0117	0.0018	1.892e-10	-0.0118	0.0021	2.306e-08	0.0364114	0.970954	not_sig	0.7105	not_sig
TC	2	64923808	T	C	rs1477034	20.5397	2.89e-21	0.2817	-0.015	0.0014	-0.0143	0.0018	3.21e-16	-0.0153	0.002	1.744e-14	0.374502	0.708031	not_sig	0.5373	not_sig
HDL	2	65284231	A	T	rs2540949	26.4657	3.42e-27	0.3808	0.0151	0.0013	0.0171	0.0016	1.098e-25	0.013	0.0019	3.524e-12	1.66415	0.0960817	not_sig	0.1219	not_sig
logTG	2	65296280	T	C	rs2252867	41.3822	4.15e-42	0.3741	-0.019	0.0013	-0.0208	0.0016	1.293e-36	-0.0182	0.0019	7.496e-22	-1.05284	0.292414	not_sig	0.257	not_sig
TC	2	65601600	A	C	rs906578	15.6632	2.17e-16	0.5921	0.0116	0.0012	0.0136	0.0016	1.38e-17	0.0096	0.0018	7.17e-08	1.67365	0.0941989	not_sig	0.3214	not_sig
logTG	2	66665146	T	C	rs2280334	10.696	2.01e-11	0.6379	-0.01	0.0013	-0.0107	0.0017	2.055e-10	-0.0092	0.0019	2.211e-06	-0.591818	0.553973	not_sig	0.884	not_sig
HDL	2	66677881	T	G	rs1519103	10.4228	3.78e-11	0.3601	-0.011	0.0013	-0.0084	0.0017	6.659e-07	-0.0134	0.0019	3.839e-12	1.97741	0.0479956	not_sig	0.1459	not_sig
HDL	2	70233392	T	C	rs6546564	7.62873	2.35e-08	0.5789	-0.009	0.0013	-0.0091	0.0017	3.913e-08	-0.0079	0.0019	3.373e-05	-0.474578	0.635088	not_sig	0.6577	not_sig
LDL	2	70449776	A	G	rs2592182	12.294	5.08e-13	0.4419	0.0108	0.0013	0.0096	0.0017	2.096e-08	0.0124	0.0019	2.049e-10	-1.10608	0.268691	not_sig	0.3086	not_sig
TC	2	70471899	A	G	rs2706770	21.8467	1.42e-22	0.445	0.0136	0.0012	0.0123	0.0016	1.485e-14	0.0146	0.0018	3.062e-16	-0.96235	0.335874	not_sig	0.1358	not_sig
nonHDL	2	70511784	T	G	rs55634460	8.34593	4.51e-09	0.4412	0.0101	0.0015	0.0075	0.0022	0.0005789	0.0124	0.002	1.203e-09	-1.65509	0.0979054	not_sig	0.05232	not_sig
TC	2	71648425	T	G	rs2419077	8.49611	3.19e-09	0.7196	0.0082	0.0014	0.0087	0.0018	7.65e-07	0.0086	0.002	1.259e-05	0.0374502	0.970126	not_sig	0.8127	not_sig
logTG	2	72329685	T	C	rs10185019	7.88376	1.31e-08	0.628	-0.008	0.0013	-0.0088	0.0017	2.904e-07	-0.0068	0.0019	0.0004606	-0.78909	0.430059	not_sig	0.5988	not_sig
HDL	2	85542718	A	G	rs7608892	11.6873	2.05e-12	0.4552	-0.01	0.0013	-0.0084	0.0017	4.769e-07	-0.0134	0.0019	1.922e-12	1.97741	0.0479956	not_sig	0.3421	not_sig
TC	2	85874044	T	C	rs58588820	10.1158	7.66e-11	0.6311	0.0098	0.0013	0.0115	0.0017	7.827e-12	0.0062	0.0018	0.0006784	2.15716	0.0309931	not_sig	0.03719	not_sig
LDL	2	85879041	T	G	rs11887443	10.6273	2.36e-11	0.7518	0.0114	0.0016	0.0104	0.0021	6.02e-07	0.0119	0.0025	1.382e-06	-0.462669	0.643601	not_sig	0.8475	not_sig
TC	2	86859298	A	C	rs308915	8.4571	3.49e-09	0.5111	-0.009	0.0013	-0.007	0.0017	2.005e-05	-0.011	0.0018	2.255e-09	1.62805	0.103515	not_sig	0.01224	not_sig
nonHDL	2	88428571	T	C	rs2919872	8.28142	5.23e-09	0.5702	-0.011	0.0015	-0.0082	0.0023	0.0002776	-0.0129	0.0021	3.085e-10	1.51553	0.129637	not_sig	0.1562	not_sig
LDL	2	88438050	A	C	rs4246598	10.1945	6.39e-11	0.5614	-0.01	0.0013	-0.0082	0.0017	7.285e-07	-0.0125	0.0019	3.199e-11	1.69862	0.0893899	not_sig	0.3402	not_sig
TC	2	88438050	A	C	rs4246598	10.5026	3.14e-11	0.5606	-0.009	0.0012	-0.0072	0.0016	9.244e-06	-0.0124	0.0018	6.197e-12	2.17575	0.0295741	not_sig	0.1803	not_sig
HDL	2	100729293	T	C	rs4851250	11.9984	1e-12	0.1798	0.0135	0.0017	0.012	0.0022	3.167e-08	0.0153	0.0024	4.104e-10	-1.022	0.306779	not_sig	0.2474	not_sig
LDL	2	101631888	C	G	rs10171847	15.8969	1.27e-16	0.3491	-0.012	0.0013	-0.0132	0.0017	7.336e-15	-0.012	0.002	8.484e-10	-0.4604	0.645229	not_sig	0.371	not_sig
nonHDL	2	101631888	C	G	rs10171847	12.2466	5.67e-13	0.3388	-0.013	0.0015	-0.014	0.0022	4.732e-10	-0.0122	0.0021	4.428e-09	-0.594375	0.552261	not_sig	0.5062	not_sig
TC	2	101631888	C	G	rs10171847	13.4208	3.79e-14	0.3442	-0.011	0.0012	-0.0119	0.0016	1.413e-13	-0.0106	0.0018	5.353e-09	-0.543937	0.586485	not_sig	0.4675	not_sig
LDL	2	109090267	C	G	rs2577619	25.0758	8.4e-26	0.7956	-0.018	0.0016	-0.0169	0.0021	1.661e-16	-0.02	0.0024	3.285e-17	0.978991	0.327585	not_sig	0.8736	not_sig
nonHDL	2	109093836	A	G	rs1992172	18.5768	2.65e-19	0.1974	0.019	0.0019	0.0197	0.0027	4.771e-13	0.0195	0.0025	9.736e-15	0.0545854	0.956469	not_sig	0.8759	not_sig
TC	2	109146017	A	T	rs2718744	20.555	2.79e-21	0.8263	-0.018	0.0016	-0.017	0.0021	4.021e-16	-0.0191	0.0024	9.071e-16	0.663547	0.50698	not_sig	0.2829	not_sig
TC	2	111698040	A	C	rs3789129	8.88357	1.31e-09	0.203	0.0109	0.0015	0.0124	0.0019	9.926e-11	0.0068	0.0021	0.001671	1.99263	0.046302	not_sig	0.3231	not_sig
HDL	2	111714577	T	C	rs3789112	9.0853	8.22e-10	0.7211	0.0102	0.0014	0.0088	0.0018	6.969e-07	0.0109	0.002	7.113e-08	-0.786928	0.431324	not_sig	0.456	not_sig
logTG	2	111927379	A	G	rs6708784	18.7778	1.67e-19	0.472	-0.013	0.0013	-0.0108	0.0016	4.282e-11	-0.0156	0.0019	3.868e-17	1.9437	0.0519311	not_sig	0.06576	not_sig
logTG	2	112763640	C	G	rs7583987	7.97848	1.05e-08	0.5981	-0.009	0.0013	-0.0107	0.0017	1.16e-10	-0.0063	0.0019	0.001004	-1.736	0.0825641	not_sig	0.1442	not_sig
LDL	2	113841030	A	G	rs6734238	7.97053	1.07e-08	0.4016	-0.009	0.0013	-0.0043	0.0017	0.009367	-0.0162	0.0019	8.443e-17	4.70085	2.59086e-06	sig	0.000137	not_sig
TC	2	113841030	A	G	rs6734238	20.8516	1.41e-21	0.402	-0.014	0.0013	-0.0095	0.0016	6.225e-09	-0.0194	0.0019	1.84e-25	4.01593	5.92121e-05	sig	6.949e-05	sig
nonHDL	2	113842506	T	C	rs13398728	9.69572	2.02e-10	0.379	-0.012	0.0016	-0.0086	0.0023	0.0001605	-0.0156	0.0021	8.424e-14	2.25718	0.023997	not_sig	0.02127	not_sig
logTG	2	113867288	T	C	rs55709272	9.7504	1.78e-10	0.4331	-0.009	0.0013	-0.0087	0.0017	1.679e-07	-0.01	0.0019	1.691e-07	0.512909	0.608015	not_sig	0.02938	not_sig
LDL	2	118843158	A	G	rs55938402	66.5646	2.73e-67	0.9081	0.0421	0.0023	0.0398	0.003	3.612e-40	0.0459	0.0034	1.496e-41	-1.35487	0.175458	not_sig	0.2286	not_sig
nonHDL	2	118843158	A	G	rs55938402	47.7586	1.74e-48	0.9074	0.0424	0.0027	0.0417	0.004	7.699e-26	0.0425	0.0036	2.568e-31	-0.149294	0.881322	not_sig	0.9238	not_sig
TC	2	118843158	A	G	rs55938402	55.2385	5.77e-56	0.9078	0.0376	0.0022	0.0359	0.0029	8.129e-35	0.0413	0.0032	5.708e-37	-1.26003	0.207659	not_sig	0.2991	not_sig
logTG	2	119749146	C	G	rs78198921	11.4209	3.79e-12	0.0134	0.0439	0.0056	0.0432	0.0073	2.756e-09	0.0488	0.0083	4.479e-09	-0.509608	0.610326	not_sig	0.8562	not_sig
LDL	2	121306440	A	G	rs17050272	54.7289	1.87e-55	0.5903	0.0219	0.0013	0.0199	0.0017	3.175e-31	0.0233	0.002	9.683e-31	-1.30447	0.192074	not_sig	0.2807	not_sig
nonHDL	2	121306440	A	G	rs17050272	41.7425	1.81e-42	0.5846	0.0228	0.0016	0.0223	0.0023	1.636e-22	0.0228	0.0021	6.691e-27	-0.161227	0.871915	not_sig	0.9118	not_sig
TC	2	121306440	A	G	rs17050272	42.2884	5.15e-43	0.5908	0.0191	0.0013	0.0174	0.0017	1.818e-25	0.0207	0.0019	7.256e-27	-1.3043	0.19213	not_sig	0.4466	not_sig
logTG	2	121309231	C	G	rs954244	23.4198	3.8e-24	0.2491	0.0162	0.0014	0.0171	0.0019	1.236e-19	0.0144	0.0021	1.608e-11	0.959032	0.337543	not_sig	0.3328	not_sig
HDL	2	121347612	C	G	rs11688682	19.1645	6.85e-20	0.758	-0.017	0.0017	-0.0216	0.0022	8.069e-23	-0.0119	0.0025	1.513e-06	-2.93685	0.00331565	not_sig	0.03502	not_sig
LDL	2	122797791	C	G	rs563563230	8.29673	5.05e-09	0.0001	-0.466	0.086	-0.5685	0.1322	1.694e-05	-0.3313	0.1177	0.004888	-1.34964	0.177132	not_sig	0.02828	not_sig
TC	2	134874008	A	G	rs60668151	8.01355	9.69e-09	0.2711	0.0093	0.0014	0.0093	0.0018	4.071e-07	0.0117	0.0021	2.652e-08	-0.874346	0.38193	not_sig	0.7231	not_sig
LDL	2	135014116	A	G	rs2460382	11.4623	3.45e-12	0.2306	-0.012	0.0015	-0.0124	0.0019	1.144e-10	-0.0102	0.0022	3.375e-06	-0.762195	0.445944	not_sig	0.3159	not_sig
LDL	2	135954797	T	C	rs1375131	24.9858	1.03e-25	0.3535	0.0191	0.0017	0.0192	0.002	8.878e-21	0.0191	0.0025	2.326e-14	0.0314533	0.974908	not_sig	0.7629	not_sig
nonHDL	2	135954797	T	C	rs1375131	11.8378	1.45e-12	0.3045	0.0165	0.002	0.0162	0.0028	1.15e-08	0.0164	0.0026	5.825e-10	-0.0525666	0.958077	not_sig	0.7364	not_sig
TC	2	135954797	T	C	rs1375131	31.0587	8.74e-32	0.3501	0.0207	0.0016	0.0196	0.002	3.817e-22	0.0231	0.0024	2.472e-21	-1.12884	0.258967	not_sig	0.3933	not_sig
HDL	2	136602491	T	G	rs3739020	20.3559	4.41e-21	0.2737	0.014	0.0015	0.015	0.0018	3.418e-16	0.0134	0.0022	1.447e-09	0.567476	0.570391	not_sig	0.2964	not_sig
TC	2	136898078	A	G	rs950176	10.2531	5.58e-11	0.3535	0.0094	0.0014	0.0092	0.0017	1.232e-07	0.0117	0.002	5.77e-09	-0.959686	0.337214	not_sig	0.5502	not_sig
TC	2	144248762	A	G	rs35825582	11.2848	5.19e-12	0.5441	0.0095	0.0012	0.0103	0.0016	3.11e-11	0.0094	0.0017	6.613e-08	0.388491	0.697653	not_sig	0.8292	not_sig
logTG	2	146347459	A	G	rs6430090	11.7937	1.61e-12	0.6046	-0.011	0.0013	-0.0114	0.0017	9.151e-12	-0.01	0.0019	1.206e-07	-0.552363	0.5807	not_sig	0.9527	not_sig
HDL	2	146353184	A	T	rs7571848	7.69681	2.01e-08	0.394	-0.009	0.0013	-0.0096	0.0016	4.139e-09	-0.0065	0.0019	0.0004636	-1.25826	0.208297	not_sig	0.4232	not_sig
LDL	2	158434569	T	C	rs12614487	31.5672	2.71e-32	0.8883	0.0282	0.0022	0.0314	0.0028	1.523e-28	0.025	0.0033	1.66e-14	1.48927	0.136416	not_sig	0.1397	not_sig
nonHDL	2	158481992	A	G	rs10164853	25.7902	1.62e-26	0.1232	-0.03	0.0026	-0.0328	0.0036	1.535e-19	-0.0279	0.0034	2.92e-16	-0.993788	0.320326	not_sig	0.05472	not_sig
TC	2	158481992	A	G	rs10164853	39.8949	1.27e-40	0.1282	-0.03	0.0021	-0.0311	0.0026	7.227e-33	-0.0284	0.0029	3.359e-22	-0.698544	0.484837	not_sig	0.136	not_sig
logTG	2	158508271	T	C	rs11900786	7.89037	1.29e-08	0.8421	0.0124	0.0018	0.014	0.0024	2.807e-09	0.0109	0.0028	7.244e-05	0.845534	0.397813	not_sig	0.5971	not_sig
HDL	2	158514969	T	C	rs2509902	9.36449	4.32e-10	0.8459	-0.013	0.0018	-0.0143	0.0023	8.062e-10	-0.0125	0.0027	4.739e-06	-0.511671	0.608881	not_sig	0.1776	not_sig
logTG	2	161118687	T	C	rs10170600	9.99648	1.01e-10	0.717	0.0105	0.0014	0.008	0.0018	1.203e-05	0.014	0.002	8.234e-12	-2.24304	0.0248943	not_sig	0.04298	not_sig
HDL	2	162966841	A	C	rs62189714	8.21394	6.11e-09	0.5525	-0.008	0.0013	-0.0078	0.0017	6.534e-06	-0.0082	0.002	2.786e-05	0.153641	0.877893	not_sig	0.3176	not_sig
TC	2	163110536	A	G	rs2111485	7.30855	4.91e-08	0.5622	-0.008	0.0013	-0.0085	0.0016	1.998e-07	-0.0084	0.0019	6.514e-06	-0.0405649	0.967643	not_sig	0.2965	not_sig
LDL	2	165508389	T	C	rs10184004	10.6123	2.44e-11	0.5824	0.01	0.0013	0.0037	0.0017	0.03078	0.0197	0.002	4.812e-24	-6.13867	8.32139e-10	sig	8.888e-06	sig
nonHDL	2	165508389	T	C	rs10184004	29.6845	2.07e-30	0.5985	0.0191	0.0016	0.012	0.0023	1.408e-07	0.0257	0.0021	7.061e-35	-4.41762	9.97947e-06	sig	1.12e-05	sig
TC	2	165508389	T	C	rs10184004	8.39829	4e-09	0.5871	0.0084	0.0013	0.0048	0.0016	0.003	0.0133	0.0018	6.009e-13	-3.55651	0.000375812	not_sig	0.007733	not_sig
HDL	2	165518799	C	G	rs75265117	90.1207	7.57e-91	0.1247	0.0427	0.002	0.0333	0.0026	1.498e-38	0.0557	0.0029	1.034e-81	-5.79881	6.67871e-09	sig	4.28e-05	sig
logTG	2	165528876	T	C	rs13389219	124.956	1.11e-125	0.5933	0.0325	0.0013	0.0281	0.0017	7.933e-63	0.0398	0.0019	3.51e-95	-4.61618	3.90873e-06	sig	0.0002173	not_sig
logTG	2	169700838	A	C	rs531328	8.27373	5.32e-09	0.6333	0.0092	0.0013	0.0111	0.0017	1.006e-10	0.0076	0.0019	7.766e-05	1.38091	0.167307	not_sig	0.05445	not_sig
LDL	2	169830661	A	G	rs10176901	54.8561	1.39e-55	0.4022	0.0212	0.0013	0.0203	0.0016	4.535e-35	0.0225	0.0019	1.924e-32	-0.891948	0.372421	not_sig	0.9092	not_sig
TC	2	169831376	T	G	rs28689500	71.0219	9.51e-72	0.3981	0.0235	0.0012	0.0224	0.0016	6.899e-47	0.0252	0.0018	1.498e-46	-1.17156	0.241375	not_sig	0.7299	not_sig
nonHDL	2	169832362	A	G	rs66491446	42.4568	3.49e-43	0.3902	0.0226	0.0015	0.024	0.0022	5.702e-28	0.022	0.002	3.953e-27	0.675549	0.499327	not_sig	0.623	not_sig
logTG	2	171635168	A	G	rs1420377	8.18306	6.56e-09	0.3513	0.0088	0.0013	0.0074	0.0017	1.218e-05	0.0112	0.0019	5.227e-09	-1.49927	0.133803	not_sig	0.2544	not_sig
HDL	2	174075761	A	G	rs1866631	9.61645	2.42e-10	0.4175	0.0095	0.0013	0.0082	0.0016	4.397e-07	0.011	0.0019	3.583e-09	-1.1365	0.255749	not_sig	0.1862	not_sig
logTG	2	180707310	T	C	rs4894128	7.68851	2.05e-08	0.3027	-0.009	0.0014	-0.0092	0.0018	2.643e-07	-0.0095	0.002	2.874e-06	0.112152	0.910703	not_sig	0.8638	not_sig
HDL	2	188292458	T	C	rs16829016	8.82664	1.49e-09	0.6976	-0.01	0.0014	-0.0096	0.0018	4.292e-08	-0.0115	0.002	1.506e-08	0.711983	0.476475	not_sig	0.811	not_sig
TC	2	191566439	A	G	rs1155060	7.70596	1.97e-08	0.5778	0.0082	0.0012	0.0077	0.0016	8.619e-07	0.0091	0.0018	2.83e-07	-0.585778	0.558024	not_sig	0.465	not_sig
logTG	2	202185132	A	G	rs2110690	8.76218	1.73e-09	0.4908	0.0091	0.0013	0.01	0.0016	9.493e-10	0.0092	0.0019	6.449e-07	0.323951	0.745975	not_sig	0.3372	not_sig
TC	2	202223566	A	G	rs2349075	7.41861	3.81e-08	0.621	0.0077	0.0012	0.008	0.0016	6.979e-07	0.0068	0.0018	0.000145	0.502096	0.6156	not_sig	0.8559	not_sig
nonHDL	2	202314833	T	C	rs62189254	8.07005	8.51e-09	0.4306	-0.009	0.0015	-0.0068	0.0022	0.001746	-0.0092	0.002	4.53e-06	0.810658	0.417562	not_sig	0.7689	not_sig
nonHDL	2	203271267	T	C	rs6435149	33.5255	2.98e-34	0.2663	0.0227	0.0017	0.0172	0.0025	4.788e-12	0.0268	0.0023	2.434e-31	-2.83807	0.00453873	not_sig	0.02124	not_sig
logTG	2	203431804	A	G	rs3731696	15.1295	7.42e-16	0.1241	0.0179	0.0019	0.0187	0.0025	9.847e-14	0.0192	0.0029	2.209e-11	-0.131354	0.895495	not_sig	0.6036	not_sig
LDL	2	203460202	T	TGGCTCACGCCTGTA	rs140974562	39.2809	5.24e-40	0.7287	0.0224	0.0016	0.0216	0.002	2.316e-27	0.0232	0.0024	4.524e-22	-0.515761	0.606021	not_sig	0.6284	not_sig
TC	2	203495058	A	G	rs113867238	70.8989	1.26e-71	0.7157	0.0266	0.0014	0.0276	0.0018	3.364e-52	0.0268	0.002	7.836e-40	0.299602	0.764481	not_sig	0.7672	not_sig
HDL	2	203497786	A	C	rs7581601	29.1354	7.32e-30	0.2972	-0.018	0.0014	-0.0175	0.0018	2.188e-21	-0.0182	0.0021	2.41e-18	0.25517	0.798592	not_sig	0.6726	not_sig
HDL	2	208372913	T	G	rs2551657	9.72917	1.87e-10	0.1982	0.0125	0.0016	0.0096	0.0021	5.378e-06	0.0163	0.0024	2.07e-11	-2.1183	0.0341497	not_sig	0.3458	not_sig
TC	2	208429351	T	C	rs6740584	11.7106	1.95e-12	0.4623	-0.01	0.0012	-0.0082	0.0016	2.665e-07	-0.0119	0.0018	1.212e-11	1.54813	0.121591	not_sig	0.3991	not_sig
HDL	2	211540507	A	C	rs1047891	24.0749	8.42e-25	0.6963	0.0159	0.0014	0.0115	0.0018	4.603e-11	0.0235	0.0021	3.07e-30	-4.37434	1.21798e-05	sig	0.002356	not_sig
HDL	2	212274447	A	G	rs3791699	7.72361	1.89e-08	0.7265	0.0085	0.0014	0.0099	0.0018	3.868e-08	0.006	0.002	0.00327	1.46144	0.143895	not_sig	0.09377	not_sig
HDL	2	215377588	A	T	rs4416211	10.4744	3.35e-11	0.5207	0.0084	0.0013	0.0074	0.0016	4.82e-06	0.01	0.0018	5.299e-08	-1.08853	0.276362	not_sig	0.4921	not_sig
nonHDL	2	216300185	T	C	rs1250258	18.9308	1.17e-19	0.2662	-0.018	0.0017	-0.0184	0.0025	4.006e-13	-0.0169	0.0023	6.255e-13	-0.443448	0.657441	not_sig	0.453	not_sig
TC	2	216300185	T	C	rs1250258	23.871	1.35e-24	0.2589	-0.016	0.0014	-0.0175	0.0019	1.34e-20	-0.0149	0.0021	1.052e-12	-0.925149	0.354888	not_sig	0.1171	not_sig
LDL	2	216300482	A	T	rs1250259	24.9915	1.02e-25	0.258	-0.017	0.0015	-0.0171	0.0019	9.318e-19	-0.0168	0.0022	1.401e-14	-0.103936	0.91722	not_sig	0.2402	not_sig
LDL	2	219138170	T	G	rs10716631	9.79823	1.59e-10	0.5422	-0.01	0.0014	-0.0102	0.0018	8.003e-09	-0.0103	0.0022	1.837e-06	0.0354272	0.971739	not_sig	0.2521	not_sig
logTG	2	219142773	T	C	rs6707559	10.151	7.06e-11	0.3978	0.009	0.0013	0.0096	0.0016	5.753e-09	0.0091	0.0019	1.175e-06	0.202469	0.83955	not_sig	0.4055	not_sig
nonHDL	2	219155907	A	T	rs2382818	9.31932	4.79e-10	0.4006	0.0108	0.0015	0.0111	0.0022	3.038e-07	0.0105	0.002	1.979e-07	0.202665	0.839397	not_sig	0.7934	not_sig
TC	2	219162720	CA	C	rs145013566	12.8306	1.48e-13	0.4664	0.0115	0.0014	0.0113	0.0017	2.086e-11	0.0109	0.002	5.484e-08	0.15355	0.877965	not_sig	0.4237	not_sig
HDL	2	219699999	A	G	rs78058190	100.682	2.08e-101	0.9487	0.0804	0.0035	0.0848	0.0047	8.159e-74	0.0753	0.005	2.182e-50	1.39591	0.162741	not_sig	0.2145	not_sig
LDL	2	219699999	A	G	rs78058190	8.01385	9.69e-09	0.9485	-0.024	0.0036	-0.0159	0.0047	0.0006317	-0.0314	0.0051	5.211e-10	2.25089	0.0243927	not_sig	0.003788	not_sig
logTG	2	219699999	A	G	rs78058190	94.316	4.83e-95	0.9485	-0.076	0.0035	-0.0738	0.0046	9.045e-58	-0.0763	0.005	3.401e-53	0.370141	0.711277	not_sig	0.6903	not_sig
nonHDL	2	219699999	A	G	rs78058190	24.4314	3.7e-25	0.9466	-0.044	0.004	-0.0395	0.0059	1.732e-11	-0.046	0.0053	8.163e-18	0.823073	0.410466	not_sig	0.2723	not_sig
logTG	2	227094758	A	G	rs2203452	128.539	2.89e-129	0.6494	0.0331	0.0013	0.0407	0.0017	2.13e-126	0.0262	0.002	3.806e-41	5.5564	2.75389e-08	sig	7.589e-07	sig
HDL	2	227101309	T	C	rs2972145	151.052	8.87e-152	0.6553	-0.037	0.0013	-0.0433	0.0017	2.53e-141	-0.03	0.002	1.13e-52	-5.10858	3.24598e-07	sig	8.859e-07	sig
nonHDL	2	227103717	A	C	rs2138157	11.181	6.59e-12	0.6552	0.0125	0.0016	0.0116	0.0023	5.968e-07	0.0131	0.0021	9.242e-10	-0.483681	0.628612	not_sig	0.7407	not_sig
logTG	2	227605895	T	C	rs79639690	11.9125	1.22e-12	0.0881	0.018	0.0026	0.0143	0.0034	2.948e-05	0.0233	0.0039	2.52e-09	-1.7497	0.0801702	not_sig	0.3981	not_sig
nonHDL	2	228451050	A	G	rs116001967	8.2843	5.2e-09	0.987	0.0507	0.0073	0.0545	0.0109	5.928e-07	0.0471	0.0098	1.616e-06	0.507008	0.612149	not_sig	0.1772	not_sig
HDL	2	228565656	A	G	rs11694828	18.4204	3.8e-19	0.5709	-0.014	0.0014	-0.0137	0.0018	1.013e-14	-0.0144	0.002	5.161e-13	0.262309	0.793083	not_sig	0.4215	not_sig
HDL	2	230019348	A	G	rs985891	8.96639	1.08e-09	0.6718	0.0099	0.0013	0.0089	0.0017	2.247e-07	0.0104	0.002	1.026e-07	-0.576155	0.56451	not_sig	0.7338	not_sig
TC	2	234144942	T	C	rs62192912	8.36057	4.36e-09	0.7261	-0.011	0.0016	-0.0094	0.002	2.344e-06	-0.0117	0.0023	2.752e-07	0.760379	0.447028	not_sig	0.2843	not_sig
logTG	2	234512095	T	C	rs17868301	7.3955	4.02e-08	0.9397	-0.017	0.0028	-0.0172	0.0037	3.967e-06	-0.0163	0.004	4.925e-05	-0.166149	0.868039	not_sig	0.9523	not_sig
LDL	2	234679549	T	C	rs35203651	25.3533	4.43e-26	0.1055	0.0241	0.0021	0.0234	0.0027	2.496e-18	0.0267	0.0031	3.733e-18	-0.808437	0.418839	not_sig	0.7026	not_sig
nonHDL	2	234679549	T	C	rs35203651	27.0876	8.17e-28	0.1066	0.0285	0.0024	0.0276	0.0034	4.759e-16	0.0299	0.0032	1.709e-20	-0.494718	0.6208	not_sig	0.8092	not_sig
TC	2	234679549	T	C	rs35203651	36.3675	4.29e-37	0.1055	0.0271	0.002	0.0275	0.0025	2.55e-28	0.0265	0.0028	4.737e-21	0.268451	0.788352	not_sig	0.2022	not_sig
HDL	2	242395674	A	G	rs4675812	21.7244	1.89e-22	0.4102	-0.014	0.0013	-0.0126	0.0016	5.226e-15	-0.0169	0.0019	6.809e-20	1.74533	0.0809271	not_sig	0.2561	not_sig
logTG	3	4762734	A	T	rs7639927	14.3711	4.25e-15	0.4899	0.0113	0.0013	0.0107	0.0017	1.096e-10	0.0124	0.0019	6.131e-11	-0.670727	0.502395	not_sig	0.914	not_sig
logTG	3	9498143	A	G	rs62246311	9.45933	3.47e-10	0.9015	-0.015	0.0022	-0.015	0.0029	1.606e-07	-0.0159	0.0033	1.138e-06	0.206069	0.836737	not_sig	0.435	not_sig
nonHDL	3	11886116	T	C	rs138426171	7.74882	1.78e-08	0.9956	0.0753	0.0126	0.0827	0.0184	6.685e-06	0.0708	0.0168	2.386e-05	0.47965	0.631476	not_sig	0.7472	not_sig
TC	3	12266855	A	G	rs1584063	66.2004	6.3e-67	0.5486	0.0223	0.0012	0.0227	0.0016	8.903e-48	0.0219	0.0018	2.476e-35	0.334731	0.737828	not_sig	0.39	not_sig
LDL	3	12327431	T	G	rs13076933	49.4294	3.72e-50	0.2458	-0.025	0.0015	-0.0278	0.002	7.82e-44	-0.0222	0.0023	9.757e-23	-1.85035	0.0642625	not_sig	0.01315	not_sig
HDL	3	12360494	T	C	rs12633551	43.3152	4.84e-44	0.8733	0.047	0.0031	0.0473	0.004	6.246e-33	0.0431	0.0043	8.844e-24	0.721105	0.470845	not_sig	0.06116	not_sig
logTG	3	12383714	A	G	rs7638903	35.1694	6.77e-36	0.8717	0.0254	0.0019	0.0239	0.0024	2.515e-23	0.0284	0.0028	1.002e-24	-1.22739	0.219677	not_sig	0.2655	not_sig
nonHDL	3	12445807	A	C	rs1151996	35.5957	2.54e-36	0.3675	-0.019	0.0015	-0.0225	0.0023	4.664e-23	-0.019	0.0021	8.322e-20	-1.12859	0.259071	not_sig	0.1538	not_sig
TC	3	12793024	A	G	rs113223234	16.2312	5.87e-17	0.9076	0.0204	0.0022	0.0224	0.0028	2.209e-15	0.019	0.0031	1.206e-09	0.820175	0.412117	not_sig	0.393	not_sig
LDL	3	12856856	A	G	rs2305398	7.34894	4.48e-08	0.5897	-0.009	0.0013	-0.0095	0.0017	3.326e-08	-0.0083	0.002	2.535e-05	-0.4604	0.645229	not_sig	0.4659	not_sig
logTG	3	15667215	A	C	rs11128749	7.51916	3.03e-08	0.6	-0.008	0.0013	-0.0083	0.0017	1.129e-06	-0.0072	0.0019	0.0002159	-0.434	0.664289	not_sig	0.5742	not_sig
HDL	3	15782711	A	C	rs2455850	14.7557	1.76e-15	0.666	0.0116	0.0014	0.0124	0.0018	4.105e-12	0.0115	0.0021	2.344e-08	0.328076	0.742854	not_sig	0.3969	not_sig
logTG	3	23368583	A	G	rs11717397	7.84339	1.43e-08	0.5553	-0.009	0.0013	-0.0115	0.0016	2.952e-12	-0.0064	0.0019	0.0006412	-2.06519	0.0389054	not_sig	0.2155	not_sig
HDL	3	24302811	A	G	rs113967141	14.3821	4.15e-15	0.8802	0.0177	0.0019	0.0167	0.0025	1.858e-11	0.0203	0.0028	4.669e-13	-0.967006	0.333541	not_sig	0.8203	not_sig
LDL	3	24520283	A	G	rs6792725	18.4858	3.27e-19	0.6756	-0.015	0.0014	-0.0161	0.0019	1.452e-17	-0.0127	0.0021	8.486e-10	-1.20915	0.226604	not_sig	0.1777	not_sig
logTG	3	24520283	A	G	rs6792725	22.812	1.54e-23	0.6747	-0.016	0.0014	-0.0148	0.0019	1.392e-15	-0.0175	0.002	1.048e-17	0.984549	0.324846	not_sig	0.9579	not_sig
nonHDL	3	24520283	A	G	rs6792725	24.1587	6.94e-25	0.6687	-0.019	0.0017	-0.0211	0.0024	3.369e-18	-0.0168	0.0022	5.643e-14	-1.32639	0.184712	not_sig	0.1144	not_sig
TC	3	24520283	A	G	rs6792725	27.9357	1.16e-28	0.6753	-0.017	0.0014	-0.0197	0.0018	3.462e-27	-0.0147	0.002	1.54e-13	-1.87251	0.0611358	not_sig	0.07239	not_sig
nonHDL	3	32514647	A	T	rs9837622	30.989	1.03e-31	0.9112	0.034	0.0028	0.0316	0.0041	2.533e-14	0.0367	0.0038	2.061e-22	-0.916222	0.35955	not_sig	0.606	not_sig
LDL	3	32533010	T	C	rs7640978	42.6822	2.08e-43	0.8832	0.0309	0.0021	0.031	0.0027	1.085e-29	0.0323	0.0032	1.618e-23	-0.312689	0.754517	not_sig	0.6861	not_sig
TC	3	32533010	T	C	rs7640978	39.5996	2.51e-40	0.8836	0.0294	0.0021	0.03	0.0027	4.741e-29	0.0302	0.0031	1.529e-22	-0.0490227	0.960901	not_sig	0.5199	not_sig
HDL	3	36960660	A	C	rs7622114	17.3326	4.65e-18	0.4237	-0.013	0.0013	-0.0116	0.0017	1.852e-12	-0.015	0.0019	1.225e-15	1.34464	0.178742	not_sig	0.3521	not_sig
logTG	3	37025661	T	C	rs9831084	12.3615	4.35e-13	0.4354	-0.011	0.0013	-0.011	0.0017	3.845e-11	-0.0108	0.0019	1.538e-08	-0.078909	0.937105	not_sig	0.9558	not_sig
HDL	3	47045846	T	C	rs2305637	25.1283	7.44e-26	0.8318	0.0205	0.0017	0.0204	0.0022	4.731e-20	0.0201	0.0025	2.075e-15	0.0908304	0.927627	not_sig	0.8196	not_sig
TC	3	47955346	G	GT	rs140444852	12.3002	5.01e-13	0.9831	0.0426	0.0056	0.0475	0.0073	6.026e-11	0.0403	0.0082	9.642e-07	0.660853	0.508707	not_sig	0.1672	not_sig
logTG	3	49145304	A	G	rs4955411	15.0528	8.86e-16	0.7699	0.0141	0.0015	0.0132	0.002	2.522e-11	0.0164	0.0023	1.272e-12	-1.05605	0.290943	not_sig	0.5699	not_sig
HDL	3	50038664	A	G	rs11925192	53.2607	5.49e-54	0.52	0.0216	0.0013	0.0204	0.0016	8.337e-36	0.024	0.0019	2.392e-37	-1.46121	0.143958	not_sig	0.1385	not_sig
TC	3	50219991	C	G	rs6446202	10.9307	1.17e-11	0.1421	-0.013	0.0018	-0.0118	0.0023	3.169e-07	-0.0157	0.0026	1.846e-09	1.13211	0.257588	not_sig	0.9582	not_sig
nonHDL	3	50374293	A	G	rs2073499	8.04869	8.94e-09	0.2576	-0.014	0.002	-0.0143	0.0028	3.214e-07	-0.0117	0.0026	8.289e-06	-0.683365	0.494376	not_sig	0.2234	not_sig
TC	3	52063885	T	C	rs56208706	8.06456	8.62e-09	0.9822	0.0294	0.0051	0.0285	0.0067	2.287e-05	0.0306	0.0074	3.433e-05	-0.211986	0.832118	not_sig	0.6352	not_sig
HDL	3	52124388	T	C	rs138789058	10.5838	2.61e-11	0.9827	0.0404	0.0052	0.0398	0.0068	6.174e-09	0.0442	0.0076	5.478e-09	-0.43503	0.663541	not_sig	0.8957	not_sig
logTG	3	52346240	T	G	rs17052061	23.5914	2.56e-24	0.1811	-0.018	0.0017	-0.0171	0.0022	2.294e-15	-0.0232	0.0025	1.156e-20	1.84252	0.0653991	not_sig	0.3827	not_sig
LDL	3	52558133	T	C	rs13621	14.4356	3.67e-15	0.4484	0.0108	0.0013	0.0105	0.0016	1.483e-10	0.0109	0.0019	6.054e-09	-0.162172	0.87117	not_sig	0.6907	not_sig
TC	3	52572056	A	G	rs7638808	11.8254	1.49e-12	0.4807	0.0095	0.0012	0.0095	0.0016	2.159e-09	0.0094	0.0018	1.761e-07	0.0418413	0.966625	not_sig	0.915	not_sig
nonHDL	3	52584787	T	C	rs2251219	8.51251	3.07e-09	0.3957	0.0097	0.0015	0.0112	0.0023	6.807e-07	0.0089	0.0021	1.775e-05	0.741644	0.458303	not_sig	0.8967	not_sig
HDL	3	52838654	T	C	rs9968117	29.8879	1.29e-30	0.8596	-0.023	0.0019	-0.0222	0.0024	1.633e-20	-0.0249	0.0028	6.68e-19	0.738171	0.460411	not_sig	0.875	not_sig
logTG	3	57533658	T	C	rs28879486	7.90851	1.23e-08	0.7894	0.0114	0.0017	0.0114	0.0021	7.79e-08	0.0133	0.0025	7.838e-08	-0.585336	0.558322	not_sig	0.6544	not_sig
HDL	3	57596105	T	C	rs4597680	9.13744	7.29e-10	0.751	-0.011	0.0016	-0.0097	0.002	1.978e-06	-0.0137	0.0024	6.346e-09	1.29086	0.196751	not_sig	0.5051	not_sig
LDL	3	58391293	C	G	rs9844432	47.1602	6.91e-48	0.0801	-0.037	0.0024	-0.0357	0.0031	2.199e-31	-0.039	0.0035	3.779e-28	0.710838	0.477184	not_sig	0.8957	not_sig
nonHDL	3	58391293	C	G	rs9844432	33.2169	6.07e-34	0.0807	-0.037	0.0028	-0.0389	0.0041	4.432e-21	-0.0355	0.0038	2.24e-20	-0.610815	0.541322	not_sig	0.4107	not_sig
TC	3	58391293	C	G	rs9844432	47.984	1.04e-48	0.0798	-0.036	0.0023	-0.036	0.003	1.639e-33	-0.0374	0.0034	3.749e-28	0.311124	0.755707	not_sig	0.9214	not_sig
HDL	3	62459819	A	C	rs76824303	7.55533	2.78e-08	0.0964	0.0145	0.0023	0.0158	0.003	1.83e-07	0.0148	0.0034	1.511e-05	0.222364	0.82403	not_sig	0.6964	not_sig
logTG	3	66868609	T	C	rs10049466	11.4129	3.86e-12	0.6761	-0.01	0.0014	-0.0095	0.0018	9.091e-08	-0.0113	0.002	1.38e-08	0.672912	0.501003	not_sig	0.7082	not_sig
HDL	3	66874481	A	C	rs12486424	7.98675	1.03e-08	0.3454	-0.008	0.0013	-0.0094	0.0017	5.112e-08	-0.0077	0.002	8.492e-05	-0.652976	0.513772	not_sig	0.2751	not_sig
HDL	3	69803691	A	T	rs2114660	8.73618	1.84e-09	0.761	-0.01	0.0015	-0.0082	0.002	3.173e-05	-0.0153	0.0022	6.398e-12	2.4078	0.0160488	not_sig	0.02567	not_sig
LDL	3	69837571	C	G	rs9834743	14.8909	1.29e-15	0.601	0.0122	0.0013	0.0109	0.0017	1.207e-10	0.0142	0.0019	2.793e-13	-1.3036	0.192371	not_sig	0.777	not_sig
nonHDL	3	69837571	C	G	rs9834743	21.0776	8.36e-22	0.6094	0.0166	0.0015	0.0185	0.0023	3.566e-16	0.0159	0.0021	2.579e-14	0.83838	0.401817	not_sig	0.3553	not_sig
TC	3	69837571	C	G	rs9834743	20.3198	4.79e-21	0.6017	0.0136	0.0013	0.0127	0.0016	1.392e-14	0.0152	0.0019	3.663e-16	-1.01412	0.310524	not_sig	0.5595	not_sig
logTG	3	69870595	A	G	rs1529585	8.63278	2.33e-09	0.4031	0.009	0.0013	0.0072	0.0017	3.044e-05	0.0121	0.002	6.086e-10	-1.87768	0.0604248	not_sig	0.04117	not_sig
HDL	3	70508703	C	G	rs4974290	9.07524	8.41e-10	0.4621	0.009	0.0013	0.0094	0.0016	6.353e-09	0.0086	0.0018	2.825e-06	0.334932	0.737677	not_sig	0.5573	not_sig
HDL	3	71532738	T	C	rs62247166	8.19242	6.42e-09	0.5437	-0.009	0.0013	-0.0119	0.0017	9.489e-13	-0.0066	0.0019	0.0006151	-2.09605	0.0360776	not_sig	0.3684	not_sig
HDL	3	87037543	A	G	rs13066793	8.91975	1.2e-09	0.0872	0.0172	0.0024	0.0175	0.003	9.348e-09	0.0182	0.0035	2.604e-07	-0.153102	0.878318	not_sig	0.6532	not_sig
logTG	3	87037543	A	G	rs13066793	8.33241	4.65e-09	0.0873	-0.017	0.0023	-0.0134	0.003	8.301e-06	-0.0229	0.0035	4.773e-11	2.07292	0.0381795	not_sig	0.1899	not_sig
LDL	3	100465609	A	G	rs3796276	7.45142	3.54e-08	0.6448	-0.009	0.0014	-0.0102	0.0018	9.464e-09	-0.0076	0.002	0.0001314	-0.973177	0.330465	not_sig	0.9767	not_sig
HDL	3	114753078	A	C	rs7643617	14.9678	1.08e-15	0.2073	-0.018	0.0019	-0.018	0.0024	8.118e-14	-0.0181	0.0027	2.467e-11	0.027911	0.977733	not_sig	0.7251	not_sig
HDL	3	119529113	T	G	rs3732356	26.1641	6.85e-27	0.105	0.0273	0.0023	0.0242	0.003	3.098e-16	0.0317	0.0035	4.118e-20	-1.64038	0.100926	not_sig	0.2453	not_sig
TC	3	119529113	T	G	rs3732356	35.4522	3.53e-36	0.1035	0.0303	0.0022	0.0321	0.0029	6.094e-29	0.0288	0.0033	2.384e-18	0.75692	0.449098	not_sig	0.5185	not_sig
LDL	3	119536429	A	G	rs3732359	16.238	5.78e-17	0.3001	0.0131	0.0014	0.0155	0.0019	9.58e-17	0.0107	0.0021	5.496e-07	1.70704	0.0878148	not_sig	0.1158	not_sig
nonHDL	3	119536429	A	G	rs3732359	12.123	7.53e-13	0.2918	0.0133	0.0017	0.0185	0.0025	1.659e-13	0.01	0.0023	1.704e-05	2.51287	0.0119752	not_sig	0.05305	not_sig
LDL	3	122285218	CT	C	rs68028452	30.3911	4.06e-31	0.305	0.0189	0.0015	0.0128	0.0019	8.099e-12	0.0273	0.0022	4.953e-34	-5.02356	5.07233e-07	sig	1.018e-05	sig
nonHDL	3	122285218	CT	C	rs68028452	19.32	4.79e-20	0.3142	0.0173	0.0017	0.0115	0.0024	1.713e-06	0.0238	0.0023	1.206e-25	-3.71607	0.000202349	not_sig	0.0002741	not_sig
TC	3	122285218	CT	C	rs68028452	25.1955	6.37e-26	0.3091	0.0165	0.0014	0.0123	0.0017	1.845e-12	0.025	0.002	9.049e-35	-4.8752	1.08697e-06	sig	2.704e-05	sig
HDL	3	123065778	A	G	rs11708067	11.0893	8.14e-12	0.2237	-0.013	0.0015	-0.0103	0.002	2.47e-07	-0.016	0.0023	2.925e-12	1.88555	0.0593562	not_sig	0.4591	not_sig
LDL	3	123068744	T	C	rs11719201	8.6847	2.07e-09	0.7722	0.0099	0.0015	0.0062	0.002	0.001581	0.015	0.0023	4.831e-11	-2.9077	0.00364098	not_sig	0.0003632	not_sig
TC	3	123068744	T	C	rs11719201	17.8139	1.53e-18	0.7724	0.014	0.0015	0.0104	0.0019	5.833e-08	0.0198	0.0022	1.089e-19	-3.25841	0.00112037	not_sig	0.001573	not_sig
LDL	3	124959834	T	C	rs2011442	11.647	2.25e-12	0.351	-0.011	0.0013	-0.0125	0.0018	1.248e-12	-0.0089	0.002	5.952e-06	-1.34748	0.177827	not_sig	0.06142	not_sig
TC	3	124959834	T	C	rs2011442	13.579	2.64e-14	0.3503	-0.011	0.0013	-0.0128	0.0017	6.799e-14	-0.0099	0.0019	1.695e-07	-1.14621	0.251709	not_sig	0.1301	not_sig
TC	3	126058362	A	G	rs9862203	14.1728	6.72e-15	0.7439	0.0125	0.0014	0.0114	0.0018	1.051e-10	0.0108	0.002	4.446e-08	0.224701	0.822212	not_sig	0.4271	not_sig
LDL	3	126060315	T	C	rs7641302	15.7531	1.77e-16	0.752	0.0136	0.0015	0.0137	0.0019	1.247e-12	0.0121	0.0022	2.505e-08	0.554323	0.579357	not_sig	0.7174	not_sig
LDL	3	127281890	A	G	rs12489933	8.61314	2.44e-09	0.8708	-0.013	0.0019	-0.0125	0.0025	8.123e-07	-0.013	0.0029	5.377e-06	0.131515	0.895368	not_sig	0.738	not_sig
TC	3	127292333	A	G	rs62264113	7.74686	1.79e-08	0.8605	-0.012	0.0018	-0.0114	0.0024	1.35e-06	-0.0134	0.0026	2.101e-07	0.569586	0.568958	not_sig	0.8628	not_sig
LDL	3	129274936	A	G	rs56203737	14.6887	2.05e-15	0.1371	0.0178	0.0019	0.0189	0.0025	2.221e-14	0.0176	0.0029	1.206e-09	0.341938	0.732398	not_sig	0.4339	not_sig
TC	3	129278182	A	G	rs56299595	17.1569	6.97e-18	0.1743	0.0111	0.0017	0.0106	0.0021	4.899e-07	0.0099	0.0024	3.165e-05	0.221182	0.824951	not_sig	0.5832	not_sig
HDL	3	129296847	A	G	rs2811468	12.1536	7.02e-13	0.2088	0.0126	0.0015	0.0105	0.002	1.075e-07	0.0133	0.0022	2.825e-09	-0.949556	0.342338	not_sig	0.4907	not_sig
nonHDL	3	132119691	A	T	rs115771255	30.2006	6.3e-31	0.0933	-0.033	0.0027	-0.0285	0.0039	5.068e-13	-0.0374	0.0037	1.265e-24	1.66265	0.0963834	not_sig	0.04696	not_sig
LDL	3	132183991	A	G	rs74341202	35.4249	3.76e-36	0.9522	0.0425	0.0031	0.0422	0.004	6.818e-26	0.0433	0.0046	9.101e-21	-0.181731	0.855794	not_sig	0.9418	not_sig
TC	3	132183991	A	G	rs74341202	41.3838	4.13e-42	0.9529	0.0444	0.003	0.0416	0.0039	8.266e-27	0.0474	0.0044	4.706e-27	-0.994023	0.320212	not_sig	0.4468	not_sig
HDL	3	133478557	T	G	rs6762415	7.68396	2.07e-08	0.531	-0.009	0.0012	-0.0111	0.0016	5.819e-12	-0.0066	0.0018	0.0003096	-1.88399	0.0595663	not_sig	0.4567	not_sig
LDL	3	133490334	A	C	rs6794370	9.3131	4.86e-10	0.7931	-0.011	0.0017	-0.0113	0.0021	1.291e-07	-0.0107	0.0025	2.579e-05	-0.185068	0.853176	not_sig	0.5978	not_sig
TC	3	133490334	A	C	rs6794370	12.6384	2.3e-13	0.7922	-0.013	0.0016	-0.0126	0.002	2.504e-10	-0.0136	0.0023	3.572e-09	0.330599	0.740947	not_sig	0.6015	not_sig
HDL	3	135932359	T	C	rs687339	48.6479	2.25e-49	0.219	0.0244	0.0015	0.0227	0.002	2.506e-30	0.0269	0.0022	2.894e-33	-1.42433	0.15435	not_sig	0.2596	not_sig
nonHDL	3	135932359	T	C	rs687339	20.6849	2.07e-21	0.219	-0.019	0.0018	-0.0193	0.0027	3.694e-13	-0.0211	0.0024	3.761e-18	0.500398	0.616795	not_sig	0.4894	not_sig
logTG	3	135956305	A	C	rs684773	41.7215	1.9e-42	0.8002	0.0243	0.0016	0.0213	0.0022	4.253e-22	0.0285	0.0023	1.398e-36	-2.27559	0.0228704	not_sig	0.06422	not_sig
LDL	3	136020541	T	C	rs1711171	11.1438	7.18e-12	0.7693	0.0121	0.0015	0.0112	0.002	1.235e-08	0.0147	0.0022	4.248e-11	-1.18559	0.235786	not_sig	0.9068	not_sig
TC	3	136450593	T	C	rs6771713	8.48967	3.24e-09	0.6668	-0.01	0.0014	-0.008	0.0018	1.135e-05	-0.0128	0.002	6.596e-11	1.79761	0.0722386	not_sig	0.04892	not_sig
nonHDL	3	142019751	A	G	rs111834982	7.88443	1.3e-08	0.1231	-0.015	0.0022	-0.0108	0.0032	0.000791	-0.0158	0.003	1.137e-07	1.14479	0.252297	not_sig	0.2153	not_sig
logTG	3	142078759	T	C	rs73238159	9.40487	3.94e-10	0.8764	0.0142	0.0019	0.0143	0.0025	8.198e-09	0.0141	0.0028	5.009e-07	0.0535954	0.957258	not_sig	0.7722	not_sig
TC	3	142078759	T	C	rs73238159	12.3576	4.39e-13	0.8764	0.0157	0.0019	0.0127	0.0024	2.034e-07	0.0195	0.0027	9.183e-13	-1.89681	0.0578535	not_sig	0.1727	not_sig
LDL	3	142159885	A	G	rs11711179	7.5279	2.97e-08	0.8739	0.0128	0.0019	0.0099	0.0025	6.767e-05	0.016	0.0028	1.023e-08	-1.63666	0.101701	not_sig	0.4243	not_sig
nonHDL	3	142649110	C	G	rs9832727	16.6945	2.02e-17	0.3177	-0.016	0.0016	-0.0132	0.0024	4.552e-08	-0.0183	0.0022	7.313e-17	1.57315	0.115683	not_sig	0.08833	not_sig
TC	3	142649110	C	G	rs9832727	22.6763	2.11e-23	0.3288	-0.014	0.0013	-0.013	0.0017	9.589e-14	-0.0174	0.002	1.069e-18	1.68905	0.0912105	not_sig	0.03867	not_sig
LDL	3	142660706	A	G	rs9653945	14.8362	1.46e-15	0.668	0.0121	0.0014	0.0117	0.0018	3.049e-11	0.014	0.002	4.051e-12	-0.860887	0.3893	not_sig	0.609	not_sig
logTG	3	142660706	A	G	rs9653945	16.1181	7.62e-17	0.6682	0.0121	0.0013	0.0106	0.0017	8.907e-10	0.0154	0.002	7.196e-15	-1.83936	0.065862	not_sig	0.003885	not_sig
TC	3	145924454	A	C	rs143201630	7.93511	1.16e-08	0.9936	0.0685	0.0098	0.0713	0.0141	4.309e-07	0.0741	0.013	1.035e-08	-0.147122	0.883036	not_sig	0.9815	not_sig
nonHDL	3	147076791	T	G	rs884370	9.35072	4.46e-10	0.7609	-0.013	0.0017	-0.0109	0.0026	2.021e-05	-0.0144	0.0023	7.913e-10	1.01256	0.311269	not_sig	0.2091	not_sig
TC	3	147076791	T	G	rs884370	8.43768	3.65e-09	0.7598	-0.01	0.0014	-0.0089	0.0019	1.865e-06	-0.0114	0.0021	4.684e-08	0.889567	0.373699	not_sig	0.9853	not_sig
HDL	3	150066540	A	T	rs62271373	26.8597	1.38e-27	0.9487	0.0364	0.0031	0.0396	0.004	8.978e-23	0.0346	0.0045	1.113e-14	0.837329	0.402408	not_sig	0.2137	not_sig
logTG	3	150066540	A	T	rs62271373	24.9879	1.03e-25	0.9486	-0.035	0.003	-0.0325	0.004	4.188e-16	-0.0404	0.0044	6.011e-20	1.33638	0.181427	not_sig	0.5925	not_sig
HDL	3	152016969	T	C	rs1426383	15.2511	5.61e-16	0.684	-0.013	0.0014	-0.015	0.0018	2.153e-16	-0.0108	0.002	8.725e-08	-1.57386	0.115521	not_sig	0.234	not_sig
HDL	3	153851061	A	G	rs16846895	8.05287	8.85e-09	0.2249	-0.012	0.0017	-0.008	0.0022	0.0002192	-0.017	0.0025	9.449e-12	2.72491	0.00643187	not_sig	0.01078	not_sig
nonHDL	3	155532694	A	T	rs439765	10.4036	3.95e-11	0.2493	0.0133	0.0017	0.0141	0.0024	8.859e-09	0.0138	0.0023	2.007e-09	0.0906358	0.927782	not_sig	0.8298	not_sig
logTG	3	155535351	C	G	rs6787781	11.7328	1.85e-12	0.6816	-0.012	0.0014	-0.0106	0.0018	3.758e-09	-0.0135	0.0021	9.215e-11	1.05464	0.291588	not_sig	0.2836	not_sig
LDL	3	155546124	T	C	rs76440173	10.0404	9.11e-11	0.9955	-0.079	0.0109	-0.0744	0.014	1.083e-07	-0.0813	0.0162	5.114e-07	0.324549	0.745523	not_sig	0.6345	not_sig
TC	3	155560978	T	C	rs407258	12.456	3.5e-13	0.2458	0.0116	0.0014	0.0111	0.0018	9.85e-10	0.0129	0.002	2.343e-10	-0.674104	0.500245	not_sig	0.6249	not_sig
HDL	3	156244888	T	C	rs62285077	7.4919	3.22e-08	0.8357	-0.009	0.0017	-0.0099	0.0023	1.263e-05	-0.01	0.0026	0.0001111	0.0290459	0.976828	not_sig	0.2134	not_sig
HDL	3	156797941	T	C	rs67261871	49.2437	5.71e-50	0.3916	0.0205	0.0013	0.0242	0.0016	3.051e-50	0.0166	0.0019	3.98e-19	3.08477	0.00203708	not_sig	0.01365	not_sig
logTG	3	156797941	T	C	rs67261871	37.5728	2.67e-38	0.3896	-0.018	0.0013	-0.0219	0.0017	3.215e-40	-0.0132	0.0019	2.898e-12	-3.43254	0.000597951	not_sig	0.2788	not_sig
LDL	3	160028014	T	C	rs4679881	17.7418	1.81e-18	0.5198	-0.013	0.0013	-0.0124	0.0017	1.668e-13	-0.0126	0.0019	3.729e-11	0.0790058	0.937028	not_sig	0.7656	not_sig
TC	3	160029964	C	G	rs55687857	28.5055	3.12e-29	0.4886	0.0153	0.0012	0.0149	0.0016	4.559e-21	0.015	0.0018	1.925e-17	-0.0418413	0.966625	not_sig	0.9746	not_sig
nonHDL	3	160063356	A	C	rs60009222	11.309	4.91e-12	0.5085	-0.012	0.0015	-0.0117	0.0021	5.268e-08	-0.0116	0.002	6.436e-09	-0.0346307	0.972374	not_sig	0.8174	not_sig
TC	3	170727218	A	G	rs10513688	13.5482	2.83e-14	0.8733	-0.017	0.002	-0.0141	0.0025	1.97e-08	-0.0222	0.0029	3.655e-14	2.13169	0.0330324	not_sig	0.1859	not_sig
logTG	3	170732300	A	G	rs5400	26.2103	6.16e-27	0.8215	-0.022	0.0018	-0.0198	0.0023	5.651e-18	-0.0262	0.0027	3.463e-22	1.815	0.0695243	not_sig	0.05852	not_sig
nonHDL	3	170732945	A	G	rs11711206	9.3121	4.87e-10	0.1062	0.0184	0.0026	0.0132	0.0038	0.0004429	0.0238	0.0034	2.443e-12	-2.0877	0.0368246	not_sig	0.1389	not_sig
LDL	3	170758329	T	G	rs57005472	8.06512	8.61e-09	0.1083	0.0144	0.0023	0.0108	0.0029	0.0001842	0.0214	0.0034	4.886e-10	-2.38882	0.0169028	not_sig	0.1236	not_sig
LDL	3	171536255	T	G	rs4515081	10.5966	2.53e-11	0.1621	0.0131	0.0017	0.0104	0.0022	1.867e-06	0.018	0.0025	1.51e-12	-2.29841	0.0215385	not_sig	0.1187	not_sig
HDL	3	171959684	A	G	rs4894529	9.01596	9.64e-10	0.5254	-0.008	0.0013	-0.0096	0.0016	4.367e-09	-0.0073	0.0018	8.805e-05	-0.962928	0.335583	not_sig	0.5063	not_sig
logTG	3	172294500	A	G	rs79287178	40.3158	4.83e-41	0.9715	-0.06	0.0041	-0.067	0.0054	6.469e-35	-0.0515	0.006	5.182e-18	-1.93151	0.0534205	not_sig	0.1282	not_sig
TC	3	185820283	A	G	rs9844949	17.9284	1.18e-18	0.8677	0.0182	0.0018	0.0196	0.0024	1.01e-16	0.017	0.0027	1.733e-10	0.725249	0.468299	not_sig	0.5604	not_sig
HDL	3	185824004	T	C	rs1516725	45.7311	1.86e-46	0.8653	0.0292	0.0019	0.0285	0.0024	5.351e-32	0.0314	0.0028	1.327e-29	-0.79285	0.427865	not_sig	0.9304	not_sig
HDL	3	195298892	T	C	rs139828053	8.02326	9.48e-09	0.027	-0.029	0.0042	-0.0256	0.0055	3.57e-06	-0.0324	0.0062	1.496e-07	0.827259	0.40809	not_sig	0.2834	not_sig
LDL	3	195942080	T	TG	rs397726270	10.4818	3.3e-11	0.5866	-0.011	0.0015	-0.0102	0.0018	3.541e-08	-0.0112	0.0023	9.333e-07	0.344777	0.730262	not_sig	0.4745	not_sig
TC	3	195942080	T	TG	rs397726270	9.04025	9.11e-10	0.5876	-0.01	0.0015	-0.0091	0.0018	5.63e-07	-0.01	0.0022	4.804e-06	0.319016	0.749714	not_sig	0.6087	not_sig
HDL	3	196198533	T	C	rs4916497	7.99204	1.02e-08	0.6818	0.009	0.0014	0.008	0.0018	8.879e-06	0.0103	0.0021	5.188e-07	-0.838416	0.401797	not_sig	0.9172	not_sig
logTG	4	951947	T	C	rs34311866	19.7528	1.77e-20	0.1802	0.0175	0.0017	0.0163	0.0022	4.922e-14	0.0196	0.0025	1.786e-15	-0.996773	0.318875	not_sig	0.4487	not_sig
HDL	4	965720	A	G	rs13101828	19.799	1.59e-20	0.4499	0.0135	0.0013	0.0121	0.0016	9.249e-14	0.015	0.0019	6.819e-16	-1.17708	0.239162	not_sig	0.3339	not_sig
nonHDL	4	965720	A	G	rs13101828	8.39893	3.99e-09	0.452	-0.011	0.0015	-0.0077	0.0021	0.0003547	-0.0139	0.002	5.603e-12	2.1471	0.0317852	not_sig	0.1418	not_sig
HDL	4	2260812	T	C	rs28619238	8.3781	4.19e-09	0.212	0.012	0.0017	0.0118	0.0021	3.357e-08	0.013	0.0025	1.463e-07	-0.370556	0.710969	not_sig	0.7071	not_sig
logTG	4	2888622	A	G	rs3775067	15.6842	2.07e-16	0.6047	-0.011	0.0013	-0.01	0.0017	2.284e-09	-0.0138	0.0019	5.148e-13	1.49927	0.133803	not_sig	0.1787	not_sig
nonHDL	4	2888622	A	G	rs3775067	7.52144	3.01e-08	0.6056	-0.01	0.0015	-0.0074	0.0022	0.0007284	-0.0124	0.002	1.095e-09	1.68887	0.0912441	not_sig	0.1689	not_sig
HDL	4	3241845	T	C	rs362307	7.90462	1.25e-08	0.9267	0.0181	0.0026	0.0202	0.0034	3.572e-09	0.0173	0.0038	4.292e-06	0.573448	0.566341	not_sig	0.1251	not_sig
LDL	4	3443931	A	G	rs13108218	37.4183	3.82e-38	0.5991	-0.018	0.0013	-0.0139	0.0017	5.973e-16	-0.0236	0.002	2.64e-33	3.72157	0.000197988	not_sig	0.001743	not_sig
logTG	4	3443931	A	G	rs13108218	86.2256	5.95e-87	0.5986	-0.027	0.0013	-0.026	0.0017	4.45e-53	-0.0303	0.0019	1.184e-55	1.69654	0.0897829	not_sig	0.2961	not_sig
nonHDL	4	3443931	A	G	rs13108218	57.7292	1.87e-58	0.5991	-0.026	0.0015	-0.0236	0.0022	8.555e-27	-0.0306	0.0021	2.368e-50	2.31146	0.0208075	not_sig	0.04955	not_sig
TC	4	3443931	A	G	rs13108218	75.0341	9.24e-76	0.5928	-0.024	0.0013	-0.0215	0.0016	2.61e-40	-0.0286	0.0018	3.572e-55	2.97073	0.0029709	not_sig	0.007299	not_sig
HDL	4	4990298	A	G	rs4450871	10.1653	6.83e-11	0.4552	0.011	0.0014	0.0072	0.0018	7.695e-05	0.0163	0.0021	5.322e-15	-3.31721	0.000909208	not_sig	0.0003197	not_sig
logTG	4	4990298	A	G	rs4450871	17.744	1.8e-18	0.4571	-0.014	0.0014	-0.0106	0.0018	3.783e-09	-0.0197	0.0021	7.709e-22	3.3094	0.000934956	not_sig	0.0003643	not_sig
nonHDL	4	7219933	T	G	rs4234798	9.32462	4.74e-10	0.6219	0.0113	0.0015	0.0094	0.0022	2.759e-05	0.0137	0.0021	3.381e-11	-1.4199	0.155638	not_sig	0.4229	not_sig
LDL	4	7222253	A	G	rs4689088	13.1547	7e-14	0.3734	-0.011	0.0013	-0.0101	0.0017	2.118e-09	-0.014	0.0019	3.689e-13	1.54061	0.123411	not_sig	0.5597	not_sig
TC	4	7223319	T	G	rs4689653	11.9099	1.23e-12	0.6275	0.0103	0.0012	0.0088	0.0016	2.499e-08	0.0133	0.0018	9.991e-14	-1.88286	0.0597195	not_sig	0.298	not_sig
LDL	4	15028043	C	G	rs62409270	8.27955	5.25e-09	0.6609	-0.009	0.0014	-0.0092	0.0018	2.1e-07	-0.0095	0.002	2.976e-06	0.11229	0.910594	not_sig	0.9001	not_sig
nonHDL	4	17880416	A	C	rs7700107	8.53662	2.91e-09	0.1535	0.0148	0.0021	0.016	0.003	7.357e-08	0.0151	0.0028	9.421e-08	0.220256	0.825672	not_sig	0.963	not_sig
logTG	4	17884986	T	C	rs16895971	25.5243	2.99e-26	0.1468	0.0217	0.0018	0.0213	0.0024	2.438e-19	0.0239	0.0027	6.053e-19	-0.723968	0.469085	not_sig	0.3014	not_sig
HDL	4	17957688	A	T	rs7673321	11.8357	1.46e-12	0.8506	0.0138	0.0017	0.0131	0.0022	4.993e-09	0.0158	0.0026	1.242e-09	-0.799263	0.424138	not_sig	0.4717	not_sig
HDL	4	26047616	A	G	rs73243877	25.7549	1.76e-26	0.1584	-0.021	0.0018	-0.019	0.0023	3.876e-16	-0.0236	0.0027	8.433e-19	1.3076	0.191007	not_sig	0.7409	not_sig
logTG	4	26047616	A	G	rs73243877	27.9994	1e-28	0.1584	0.0216	0.0018	0.0186	0.0023	8.654e-16	0.0255	0.0026	3.013e-22	-1.99943	0.0455622	not_sig	0.1965	not_sig
nonHDL	4	26098810	A	G	rs6448432	9.66746	2.15e-10	0.712	-0.011	0.0017	-0.0089	0.0025	0.0004318	-0.0121	0.0023	1.294e-07	0.946023	0.344137	not_sig	0.6044	not_sig
HDL	4	39698824	A	G	rs3912391	8.2152	6.09e-09	0.4999	-0.009	0.0013	-0.0067	0.0016	4.387e-05	-0.0126	0.0019	1.116e-11	2.39476	0.0166313	not_sig	0.1616	not_sig
logTG	4	39698824	A	G	rs3912391	7.72985	1.86e-08	0.4995	0.0078	0.0012	0.0051	0.0016	0.001759	0.0116	0.0018	2.801e-10	-2.71488	0.00662997	not_sig	0.1168	not_sig
HDL	4	45186139	A	G	rs10938398	8.78194	1.65e-09	0.5958	0.009	0.0013	0.0118	0.0016	3.772e-13	0.0071	0.0019	0.0001334	1.90769	0.0564315	not_sig	0.005707	not_sig
LDL	4	54453676	T	C	rs17083112	9.1486	7.1e-10	0.1481	-0.013	0.0018	-0.0123	0.0023	9.498e-08	-0.0129	0.0026	8.531e-07	0.174076	0.861806	not_sig	0.9523	not_sig
logTG	4	55498781	CG	C	rs35484700	10.5049	3.13e-11	0.462	-0.01	0.0013	-0.0086	0.0017	4.92e-07	-0.0121	0.002	2.234e-09	1.3412	0.179855	not_sig	0.1103	not_sig
HDL	4	55530748	A	ATTATTTAT	rs150361490	11.1367	7.3e-12	0.5532	-0.011	0.0014	-0.0098	0.0017	1.638e-08	-0.0112	0.0021	7.856e-08	0.522387	0.601401	not_sig	0.2195	not_sig
HDL	4	69339933	A	G	rs35662434	14.665	2.16e-15	0.2122	0.0149	0.0016	0.0166	0.0021	8.741e-16	0.0139	0.0024	8.467e-09	0.853643	0.393303	not_sig	0.5516	not_sig
LDL	4	69491284	A	T	rs4860987	59.0589	8.73e-60	0.2423	0.031	0.0018	0.0422	0.0023	7.527e-77	0.016	0.0026	9.381e-10	7.60133	2.93112e-14	sig	4.247e-15	sig
nonHDL	4	69491284	A	T	rs4860987	50.079	8.34e-51	0.2401	0.0329	0.0021	0.0523	0.003	1.83e-69	0.0147	0.0028	9.845e-08	9.20182	3.51953e-20	sig	2.871e-18	sig
TC	4	69491284	A	T	rs4860987	96.3914	4.06e-97	0.2407	0.0386	0.0017	0.0545	0.0022	8.63e-134	0.0186	0.0025	1.227e-13	10.8629	1.73251e-27	sig	1.59e-24	sig
logTG	4	69588052	T	C	rs293435	22.6809	2.08e-23	0.6627	-0.015	0.0014	-0.0187	0.0018	3.346e-26	-0.0103	0.002	4.033e-07	-3.14026	0.00168801	not_sig	0.0004091	not_sig
TC	4	70117093	T	C	rs183970949	13.2626	5.46e-14	0.9953	0.0832	0.0099	0.1003	0.0129	7.783e-15	0.0625	0.0146	1.84e-05	1.95507	0.0505746	not_sig	0.09228	not_sig
LDL	4	70264840	A	G	rs187479321	10.5607	2.75e-11	0.0041	-0.084	0.011	-0.095	0.0146	8.586e-11	-0.0701	0.0158	8.675e-06	-1.16573	0.243724	not_sig	0.6245	not_sig
nonHDL	4	70264840	A	G	rs187479321	8.81001	1.55e-09	0.0041	-0.089	0.0126	-0.1185	0.0188	2.669e-10	-0.0659	0.017	0.0001071	-2.08411	0.0371499	not_sig	0.1525	not_sig
nonHDL	4	71297926	T	C	rs142641018	7.78088	1.66e-08	0.9976	-0.112	0.0175	-0.1011	0.0272	0.0001999	-0.1288	0.025	2.615e-07	0.752997	0.451452	not_sig	0.8632	not_sig
nonHDL	4	71820941	A	G	rs368790862	11.7047	1.97e-12	0.9978	-0.111	0.0193	-0.0861	0.0302	0.004421	-0.1079	0.0271	6.928e-05	0.539551	0.589507	not_sig	0.7774	not_sig
LDL	4	72754788	A	C	rs938075289	37.0218	9.51e-38	0.0015	0.3237	0.0232	0.3193	0.0326	1.269e-22	0.3372	0.0327	6.549e-25	-0.390444	0.696208	not_sig	0.04538	not_sig
nonHDL	4	72754788	A	C	rs938075289	31.7064	1.97e-32	0.0016	0.3079	0.0236	0.268	0.0399	1.93e-11	0.3352	0.034	5.949e-23	-1.28735	0.197971	not_sig	0.05586	not_sig
TC	4	72754788	A	C	rs938075289	48.4812	3.3e-49	0.0015	0.364	0.0225	0.3327	0.0317	8.866e-26	0.4028	0.0321	4.035e-36	-1.56584	0.117387	not_sig	0.01462	not_sig
LDL	4	73491622	A	G	rs537526354	65.2722	5.34e-66	0.9982	-0.399	0.0217	-0.409	0.0298	5.683e-43	-0.3907	0.0315	2.114e-35	-0.425049	0.670801	not_sig	0.4236	not_sig
nonHDL	4	73491622	A	G	rs537526354	61.7126	1.94e-62	0.9982	-0.401	0.0223	-0.3783	0.0367	5.647e-25	-0.4062	0.0328	3.69e-35	0.569247	0.569188	not_sig	0.2063	not_sig
TC	4	73491622	A	G	rs537526354	87.53	2.95e-88	0.9983	-0.459	0.0212	-0.4422	0.0291	3.277e-52	-0.4796	0.0309	2.708e-54	0.887925	0.374581	not_sig	0.1021	not_sig
LDL	4	74033564	C	G	rs187918276	88.5875	2.59e-89	0.9987	-0.467	0.0216	-0.4715	0.0302	5.025e-55	-0.4635	0.0311	2.619e-50	-0.185867	0.852549	not_sig	0.5576	not_sig
HDL	4	74512280	A	G	rs573930512	9.41591	3.84e-10	0.9982	-0.158	0.0208	-0.1374	0.0285	1.379e-06	-0.1872	0.0304	7.13e-10	1.20504	0.228188	not_sig	0.2652	not_sig
logTG	4	74512280	A	G	rs573930512	8.26284	5.46e-09	0.9982	-0.156	0.0208	-0.133	0.0285	3.024e-06	-0.1824	0.0302	1.564e-09	1.1967	0.231422	not_sig	0.372	not_sig
nonHDL	4	74512280	A	G	rs573930512	81.5563	2.78e-82	0.9982	-0.451	0.0218	-0.4512	0.0351	8.854e-38	-0.4443	0.0318	2.522e-44	-0.146306	0.88368	not_sig	0.3909	not_sig
TC	4	74512280	A	G	rs573930512	115.276	5.29e-116	0.9983	-0.512	0.0206	-0.508	0.0284	8.671e-72	-0.5155	0.0299	1.126e-66	0.183275	0.854583	not_sig	0.6651	not_sig
LDL	4	74793806	A	G	rs181372486	54.9157	1.21e-55	0.9981	-0.342	0.0202	-0.3563	0.0275	2.362e-38	-0.3275	0.0293	4.712e-29	-0.721838	0.470394	not_sig	0.9441	not_sig
TC	4	75180409	T	C	rs190217562	43.0057	9.87e-44	0.0053	0.0892	0.0102	0.0895	0.0143	4.219e-10	0.0827	0.0139	2.54e-09	0.343615	0.731136	not_sig	0.1786	not_sig
LDL	4	75416194	T	C	rs189087436	30.9983	1e-31	0.0015	0.2327	0.0196	0.24	0.0262	5.226e-20	0.2286	0.0295	9.157e-15	0.290996	0.771054	not_sig	0.5249	not_sig
nonHDL	4	75684215	T	C	rs77021821	15.9032	1.25e-16	0.9879	-0.037	0.0076	-0.0399	0.011	0.0002796	-0.0347	0.0103	0.0007339	-0.346546	0.728932	not_sig	0.7937	not_sig
TC	4	75684215	T	C	rs77021821	20.7371	1.83e-21	0.9881	-0.03	0.0064	-0.0267	0.0085	0.001612	-0.0341	0.0093	0.0002559	0.591858	0.553946	not_sig	0.8648	not_sig
HDL	4	76572191	A	C	rs2175766	9.79983	1.59e-10	0.534	0.0098	0.0013	0.0068	0.0017	4.242e-05	0.0134	0.0019	1.25e-12	-2.61018	0.00904951	not_sig	0.02702	not_sig
TC	4	76650443	T	C	rs7662940	13.4912	3.23e-14	0.1194	-0.017	0.0019	-0.0141	0.0025	1.218e-08	-0.0196	0.0028	1.286e-12	1.47648	0.139814	not_sig	0.2051	not_sig
nonHDL	4	76740008	A	G	rs324682	7.80986	1.55e-08	0.1222	-0.014	0.0023	-0.0126	0.0033	0.0001084	-0.016	0.003	1.505e-07	0.765622	0.443901	not_sig	0.5736	not_sig
LDL	4	77420407	A	G	rs4493564	11.8017	1.58e-12	0.6267	-0.01	0.0013	-0.0091	0.0017	7.97e-08	-0.012	0.0019	6.343e-10	1.14558	0.251967	not_sig	0.5033	not_sig
logTG	4	77421345	T	C	rs28687959	12.7332	1.85e-13	0.4562	-0.01	0.0012	-0.0119	0.0016	3.037e-13	-0.0084	0.0019	6.448e-06	-1.41728	0.1564	not_sig	0.1804	not_sig
TC	4	77439399	A	C	rs71607360	8.62542	2.37e-09	0.0966	-0.014	0.0021	-0.012	0.0027	5.96e-06	-0.0174	0.003	7.166e-09	1.34821	0.177591	not_sig	0.2318	not_sig
HDL	4	83907105	A	G	rs11099563	10.4706	3.38e-11	0.729	0.0114	0.0014	0.0115	0.0018	4.459e-10	0.0107	0.0021	4.069e-07	0.291623	0.770575	not_sig	0.7448	not_sig
logTG	4	87294293	A	C	rs72663972	24.2209	6.01e-25	0.6576	-0.014	0.0013	-0.0145	0.0017	1.14e-16	-0.0161	0.002	1.964e-16	0.61312	0.539797	not_sig	0.9993	not_sig
nonHDL	4	87985166	T	C	rs3775228	24.769	1.7e-25	0.6185	-0.018	0.0015	-0.0204	0.0022	5.427e-20	-0.0166	0.002	5.296e-16	-1.28354	0.199302	not_sig	0.1311	not_sig
TC	4	87996745	A	G	rs17605615	17.6452	2.26e-18	0.6204	-0.012	0.0012	-0.0148	0.0016	8.884e-21	-0.0103	0.0018	5.623e-09	-1.88286	0.0597195	not_sig	0.03696	not_sig
HDL	4	88050554	A	G	rs342469	26.7393	1.82e-27	0.4046	0.0154	0.0012	0.0156	0.0016	2.673e-22	0.0167	0.0018	5.652e-20	-0.460531	0.645135	not_sig	0.8698	not_sig
LDL	4	88052219	T	C	rs342467	9.41155	3.88e-10	0.5956	0.0089	0.0013	0.0093	0.0017	1.999e-08	0.0092	0.0019	1.147e-06	0.0395029	0.968489	not_sig	0.8357	not_sig
logTG	4	88053085	T	C	rs342466	88.2896	5.13e-89	0.3926	-0.027	0.0013	-0.0288	0.0017	6.733e-68	-0.0262	0.0019	1.045e-44	-1.02582	0.304978	not_sig	0.3854	not_sig
logTG	4	89724963	C	G	rs10012528	19.508	3.1e-20	0.4848	0.0125	0.0012	0.0103	0.0016	1.545e-10	0.0151	0.0018	2.447e-16	-2.00483	0.0449807	not_sig	0.04098	not_sig
HDL	4	89730074	T	C	rs2167750	45.624	2.38e-46	0.511	0.0192	0.0012	0.0164	0.0016	4.856e-25	0.0236	0.0018	1.571e-38	-3.01438	0.00257501	not_sig	0.001538	not_sig
LDL	4	99713350	T	C	rs144198753	10.9098	1.23e-11	0.9888	0.0568	0.0071	0.0632	0.0091	3.351e-12	0.0521	0.0109	1.65e-06	0.787247	0.431137	not_sig	0.07204	not_sig
TC	4	99713350	T	C	rs144198753	7.93752	1.15e-08	0.9889	0.0472	0.0068	0.0529	0.0088	1.855e-09	0.0404	0.0103	8.943e-05	0.929732	0.35251	not_sig	0.2534	not_sig
HDL	4	99788480	T	C	rs12650112	10.9964	1.01e-11	0.5958	-0.009	0.0013	-0.0072	0.0017	1.484e-05	-0.0106	0.0019	1.929e-08	1.34464	0.178742	not_sig	0.9356	not_sig
logTG	4	100045616	T	C	rs1126673	18.5603	2.75e-19	0.2936	-0.014	0.0014	-0.0173	0.0018	1.328e-21	-0.009	0.0021	1.763e-05	-3.01847	0.00254059	not_sig	0.00438	not_sig
nonHDL	4	100239319	T	C	rs1229984	13.5032	3.14e-14	0.6723	0.0266	0.0038	0.0379	0.0051	1.329e-13	0.0157	0.0052	0.002468	3.06105	0.00220559	not_sig	1.36e-05	sig
HDL	4	100465173	A	G	rs1873518	22.8683	1.35e-23	0.8836	-0.029	0.0026	-0.0295	0.0032	8.044e-20	-0.0285	0.0037	3.087e-14	-0.206108	0.836706	not_sig	0.8604	not_sig
LDL	4	100488580	C	G	rs9307240	24.4847	3.28e-25	0.7488	0.0164	0.0014	0.0172	0.0019	3.934e-20	0.0161	0.0022	9.571e-14	0.381097	0.703131	not_sig	0.07025	not_sig
TC	4	100495817	T	C	rs1800804	23.1917	6.43e-24	0.251	-0.016	0.0014	-0.0153	0.0018	2.801e-17	-0.0165	0.0021	1.157e-15	0.437173	0.661986	not_sig	0.231	not_sig
HDL	4	103188709	T	C	rs13107325	184.904	1.25e-185	0.9377	0.0817	0.0027	0.0892	0.0035	1.16e-144	0.0732	0.0041	2.05e-71	2.99249	0.00276714	not_sig	0.0008089	not_sig
LDL	4	103188709	T	C	rs13107325	16.8911	1.29e-17	0.9373	0.0253	0.0027	0.0279	0.0035	1.122e-15	0.0238	0.0041	6.639e-09	0.765953	0.443704	not_sig	0.2439	not_sig
logTG	4	103188709	T	C	rs13107325	36.7589	1.74e-37	0.9373	-0.037	0.0027	-0.0365	0.0034	3.496e-26	-0.0373	0.004	2.932e-20	0.15328	0.878177	not_sig	0.995	not_sig
TC	4	103188709	T	C	rs13107325	44.2026	6.27e-45	0.9375	0.039	0.0026	0.0395	0.0034	2.135e-31	0.0405	0.0039	5.236e-25	-0.194754	0.845585	not_sig	0.2373	not_sig
HDL	4	103766720	A	G	rs74332078	14.0887	8.15e-15	0.9681	0.0349	0.0039	0.0422	0.005	5.117e-17	0.03	0.0058	2.162e-07	1.60631	0.108207	not_sig	0.2072	not_sig
logTG	4	103861380	A	G	rs10017313	11.7896	1.62e-12	0.5064	-0.011	0.0013	-0.0082	0.0016	4.909e-07	-0.0138	0.0019	1.278e-13	2.26765	0.0233503	not_sig	0.00437	not_sig
LDL	4	106064683	A	G	rs17617028	11.191	6.44e-12	0.7508	-0.012	0.0015	-0.0092	0.002	4.01e-06	-0.0154	0.0022	6.518e-12	2.10018	0.0357131	not_sig	0.0826	not_sig
HDL	4	106081636	T	C	rs9884482	12.5031	3.14e-13	0.3845	-0.011	0.0013	-0.008	0.0017	2.58e-06	-0.0155	0.0019	7.015e-16	2.96611	0.00301591	not_sig	0.01834	not_sig
HDL	4	110095620	T	C	rs138307849	30.6638	2.17e-31	0.0058	-0.117	0.0092	-0.1052	0.0122	7.81e-18	-0.1255	0.0135	1.222e-20	1.12489	0.260636	not_sig	0.3404	not_sig
logTG	4	110095620	T	C	rs138307849	32.5284	2.96e-33	0.0059	0.1207	0.0092	0.112	0.0121	1.5e-20	0.127	0.0132	7.355e-22	-0.842626	0.399437	not_sig	0.3755	not_sig
nonHDL	4	110095620	T	C	rs138307849	9.59948	2.51e-10	0.0059	0.0779	0.0109	0.0549	0.0162	0.0006967	0.1	0.0145	5.203e-12	-2.08323	0.0372299	not_sig	0.01609	not_sig
HDL	4	110638824	T	C	rs114816312	37.8934	1.28e-38	0.9941	0.1259	0.009	0.11	0.0118	8.207e-21	0.1411	0.0134	4.975e-26	-1.75621	0.079052	not_sig	0.3542	not_sig
logTG	4	110638824	T	C	rs114816312	43.8905	1.29e-44	0.994	-0.133	0.0089	-0.1281	0.0116	1.588e-28	-0.1389	0.0131	2.54e-26	0.620859	0.534693	not_sig	0.5084	not_sig
nonHDL	4	110638824	T	C	rs114816312	12.6381	2.3e-13	0.994	-0.085	0.0108	-0.0673	0.0158	2.049e-05	-0.1021	0.0143	1.048e-12	1.63999	0.101007	not_sig	0.03503	not_sig
LDL	4	110942277	C	G	rs7699288	9.86021	1.38e-10	0.6892	0.0101	0.0014	0.0093	0.0018	2.592e-07	0.0113	0.002	1.914e-08	-0.748598	0.4541	not_sig	0.8436	not_sig
TC	4	120114100	C	G	rs11729857	9.19441	6.39e-10	0.124	-0.014	0.0019	-0.0123	0.0025	6.833e-07	-0.0169	0.0027	5.493e-10	1.25974	0.207763	not_sig	0.3811	not_sig
LDL	4	120128060	A	C	rs71610255	8.20315	6.26e-09	0.1242	-0.014	0.002	-0.0141	0.0026	4.303e-08	-0.0149	0.0029	2.14e-07	0.206863	0.836117	not_sig	0.639	not_sig
logTG	4	124641827	A	G	rs192929239	10.1365	7.3e-11	0.0126	0.0459	0.0061	0.0399	0.008	6.743e-07	0.054	0.0089	1.528e-09	-1.18519	0.235943	not_sig	0.3869	not_sig
LDL	4	128662796	T	C	rs4435753	7.81092	1.55e-08	0.3966	-0.007	0.0013	-0.0069	0.0017	4.807e-05	-0.0066	0.0019	0.0007087	-0.118509	0.905665	not_sig	0.3722	not_sig
TC	4	128999619	T	C	rs34659062	9.02553	9.43e-10	0.413	-0.009	0.0012	-0.0096	0.0016	2.103e-09	-0.0089	0.0018	5.387e-07	-0.292889	0.769607	not_sig	0.4121	not_sig
logTG	4	141801478	T	C	rs7681503	8.77172	1.69e-09	0.4224	-0.009	0.0013	-0.011	0.0016	2.266e-11	-0.0065	0.0019	0.0005339	-1.82222	0.0684212	not_sig	0.2095	not_sig
HDL	4	143319721	T	C	rs62328321	8.71495	1.93e-09	0.3844	-0.009	0.0013	-0.0096	0.0017	8.379e-09	-0.0094	0.0019	6.973e-07	-0.0790963	0.936956	not_sig	0.987	not_sig
logTG	4	143326714	T	G	rs7696969	14.8602	1.38e-15	0.6202	-0.011	0.0013	-0.0115	0.0017	8.703e-12	-0.012	0.0019	3.957e-10	0.197273	0.843614	not_sig	0.7009	not_sig
logTG	4	148985862	T	C	rs2358183	8.73184	1.85e-09	0.7457	0.0104	0.0014	0.0128	0.0019	8.737e-12	0.0077	0.0021	0.0003067	1.8115	0.0700629	not_sig	0.08548	not_sig
HDL	4	151199080	A	G	rs2290846	8.02815	9.37e-09	0.7338	0.0102	0.0014	0.0128	0.0018	4.334e-12	0.0078	0.0021	0.0001573	1.82264	0.0683574	not_sig	0.05203	not_sig
TC	4	151199080	A	G	rs2290846	8.39933	3.99e-09	0.7326	0.0097	0.0014	0.008	0.0018	7.055e-06	0.0132	0.002	1.956e-11	-1.94741	0.0514853	not_sig	0.0605	not_sig
LDL	4	151206057	T	G	rs2085723	8.3025	4.98e-09	0.3702	-0.008	0.0013	-0.0078	0.0017	4.992e-06	-0.0085	0.0019	1.259e-05	0.27652	0.782148	not_sig	0.7222	not_sig
LDL	4	154191226	A	G	rs41280463	12.3307	4.67e-13	0.8416	0.0145	0.0018	0.014	0.0023	1.58e-09	0.0155	0.0026	4.047e-09	-0.43519	0.663424	not_sig	0.1966	not_sig
nonHDL	4	154191226	A	G	rs41280463	13.1137	7.7e-14	0.8393	0.0175	0.0021	0.021	0.0031	6.969e-12	0.0129	0.0028	4.044e-06	1.94733	0.0514956	not_sig	0.02021	not_sig
TC	4	154191226	A	G	rs41280463	23.7458	1.8e-24	0.843	0.019	0.0017	0.0198	0.0022	7.694e-19	0.0189	0.0025	3.49e-14	0.272328	0.78537	not_sig	0.04894	not_sig
HDL	4	154208278	T	C	rs72729623	14.1915	6.43e-15	0.8628	0.017	0.0019	0.0185	0.0024	4.213e-14	0.0152	0.0027	2.775e-08	0.921062	0.357018	not_sig	0.7793	not_sig
LDL	4	155489608	T	C	rs6054	25.2343	5.83e-26	0.9953	-0.125	0.0108	-0.0807	0.0148	5.112e-08	-0.1559	0.0148	8.122e-26	3.61865	0.000296149	not_sig	0.0002219	not_sig
logTG	4	155489608	T	C	rs6054	22.3747	4.22e-23	0.9953	-0.116	0.0107	-0.0945	0.0147	1.16e-10	-0.1345	0.0146	3.889e-20	1.94211	0.0521237	not_sig	0.03801	not_sig
nonHDL	4	155489608	T	C	rs6054	34.0759	8.4e-35	0.9949	-0.159	0.012	-0.1294	0.0184	2.292e-12	-0.1839	0.0158	1.797e-31	2.2567	0.0240269	not_sig	0.004635	not_sig
TC	4	155489608	T	C	rs6054	36.2044	6.25e-37	0.9953	-0.144	0.0103	-0.1043	0.0144	3.85e-13	-0.1735	0.0142	1.598e-34	3.44815	0.000564432	not_sig	0.00089	not_sig
HDL	4	157682598	T	C	rs11100083	27.8758	1.33e-28	0.284	0.0176	0.0014	0.0189	0.0018	7.918e-25	0.016	0.0021	2.968e-14	1.05713	0.290451	not_sig	0.1752	not_sig
logTG	4	157697086	A	G	rs13108763	21.358	4.39e-22	0.3584	-0.014	0.0013	-0.0182	0.0017	2.721e-26	-0.0105	0.002	7.738e-08	-2.95064	0.00317114	not_sig	0.001828	not_sig
LDL	4	185251995	A	T	rs72701754	7.57031	2.69e-08	0.4129	0.0082	0.0013	0.0092	0.0017	5.273e-08	0.0071	0.0019	0.0002751	0.829561	0.406787	not_sig	0.3662	not_sig
TC	4	185251995	A	T	rs72701754	10.6477	2.25e-11	0.415	0.0091	0.0012	0.0095	0.0016	1.263e-09	0.0081	0.0018	5.503e-06	0.585778	0.558024	not_sig	0.4815	not_sig
HDL	5	665148	A	G	rs72707016	7.55277	2.8e-08	0.1848	0.0112	0.0017	0.0101	0.0022	3.98e-06	0.0136	0.0025	6.483e-08	-1.05969	0.289287	not_sig	0.7175	not_sig
HDL	5	1284135	T	C	rs4449583	8.26512	5.43e-09	0.6765	0.0092	0.0014	0.009	0.0018	5.397e-07	0.0093	0.0021	7.845e-06	-0.109359	0.912918	not_sig	0.6776	not_sig
HDL	5	39451982	T	C	rs16868954	14.197	6.35e-15	0.937	-0.027	0.003	-0.0207	0.004	2.726e-07	-0.0346	0.0044	1.915e-15	2.35693	0.0184265	not_sig	0.005763	not_sig
TC	5	39549119	A	G	rs2221258	11.9017	1.25e-12	0.6373	-0.011	0.0013	-0.0115	0.0016	8.909e-13	-0.0088	0.0018	1.136e-06	-1.12972	0.258596	not_sig	0.2685	not_sig
nonHDL	5	52088271	A	G	rs115018790	17.0506	8.9e-18	0.9627	0.0394	0.0041	0.0423	0.006	2.425e-12	0.0415	0.0055	5.086e-14	0.0987077	0.92137	not_sig	0.8453	not_sig
LDL	5	52095024	T	C	rs116734477	42.7524	1.77e-43	0.9636	0.0518	0.0035	0.0549	0.0045	1.206e-33	0.0502	0.0051	1.171e-22	0.695946	0.486463	not_sig	0.2028	not_sig
TC	5	52095024	T	C	rs116734477	18.9625	1.09e-19	0.9636	0.0347	0.0034	0.035	0.0044	2.686e-15	0.0363	0.0049	1.343e-13	-0.198917	0.842328	not_sig	0.5354	not_sig
HDL	5	52697383	A	G	rs6866562	10.632	2.33e-11	0.4593	0.0097	0.0012	0.0119	0.0016	5.344e-13	0.0077	0.0018	2.917e-05	1.75839	0.078681	not_sig	0.2301	not_sig
HDL	5	53276301	A	G	rs1664781	17.0579	8.75e-18	0.2943	0.0127	0.0014	0.0174	0.0018	2.637e-23	0.007	0.002	0.0004719	3.89717	9.73239e-05	not_sig	7.363e-06	sig
nonHDL	5	53298716	T	G	rs79760705	13.0571	8.77e-14	0.8936	-0.021	0.0025	-0.0245	0.0037	3.094e-11	-0.0204	0.0034	2.016e-09	-0.819422	0.412546	not_sig	0.1942	not_sig
TC	5	53298716	T	G	rs79760705	7.99895	1e-08	0.8944	-0.014	0.0021	-0.0138	0.0027	2.945e-07	-0.015	0.003	5.906e-07	0.299602	0.764481	not_sig	0.8849	not_sig
logTG	5	53303452	C	G	rs6889847	29.1377	7.28e-30	0.7263	-0.017	0.0014	-0.0203	0.0018	3.828e-29	-0.0147	0.0021	1.115e-12	-2.03655	0.0416947	not_sig	0.07254	not_sig
HDL	5	55808475	T	C	rs465002	66.2288	5.9e-67	0.309	0.0254	0.0014	0.0259	0.0017	4.691e-50	0.0257	0.002	7.259e-38	0.0768207	0.938766	not_sig	0.6656	not_sig
LDL	5	55861359	A	G	rs13173241	17.9963	1.01e-18	0.8053	-0.015	0.0016	-0.0109	0.002	9.517e-08	-0.0208	0.0023	8.191e-19	3.27116	0.00107107	not_sig	0.05979	not_sig
logTG	5	55861359	A	G	rs13173241	104.398	4e-105	0.8053	-0.035	0.0016	-0.0323	0.002	5.175e-58	-0.0409	0.0023	3.634e-70	2.83815	0.00453764	not_sig	0.1411	not_sig
nonHDL	5	55861359	A	G	rs13173241	31.9609	1.09e-32	0.812	-0.024	0.0019	-0.0204	0.0027	3.941e-14	-0.0261	0.0025	1.215e-25	1.55568	0.119783	not_sig	0.1989	not_sig
TC	5	55861359	A	G	rs13173241	17.689	2.05e-18	0.8077	-0.015	0.0015	-0.0126	0.0019	8.226e-11	-0.0167	0.0022	2.694e-14	1.42122	0.155252	not_sig	0.3403	not_sig
nonHDL	5	57578037	A	G	rs43217	10.2052	6.23e-11	0.6894	-0.012	0.0016	-0.0101	0.0024	1.814e-05	-0.0152	0.0022	2.626e-12	1.57315	0.115683	not_sig	0.2174	not_sig
TC	5	57578037	A	G	rs43217	7.68762	2.05e-08	0.6943	-0.009	0.0013	-0.0076	0.0017	1.536e-05	-0.011	0.0019	1.391e-08	1.34383	0.179004	not_sig	0.2983	not_sig
logTG	5	57607142	A	T	rs151912	15.1402	7.24e-16	0.5762	-0.012	0.0013	-0.0108	0.0017	9.825e-11	-0.015	0.0019	1.471e-15	1.65709	0.0975014	not_sig	0.1236	not_sig
HDL	5	67714246	A	G	rs4976033	16.2055	6.23e-17	0.4241	-0.012	0.0013	-0.0105	0.0017	2.859e-10	-0.0166	0.002	4.679e-17	2.34303	0.0191278	not_sig	0.1026	not_sig
logTG	5	67714246	A	G	rs4976033	31.0347	9.23e-32	0.4244	0.0165	0.0013	0.0126	0.0017	2.42e-14	0.0219	0.0019	2.403e-29	-3.66927	0.000243245	not_sig	0.003567	not_sig
TC	5	72013573	T	G	rs3010278	22.4877	3.25e-23	0.2431	-0.016	0.0015	-0.0138	0.0019	8.423e-13	-0.0191	0.0022	1.272e-18	1.83719	0.0661818	not_sig	0.2699	not_sig
LDL	5	72159179	T	C	rs4704043	24.4017	3.97e-25	0.3295	-0.016	0.0014	-0.0136	0.0018	3.978e-14	-0.0189	0.0021	3.572e-20	1.9298	0.0536311	not_sig	0.1338	not_sig
nonHDL	5	72159179	T	C	rs4704043	21.6261	2.37e-22	0.3247	-0.017	0.0016	-0.0151	0.0023	4.442e-11	-0.0194	0.0021	1.703e-19	1.38655	0.165579	not_sig	0.09984	not_sig
HDL	5	72919127	C	G	rs2544645	13.8932	1.28e-14	0.2578	-0.013	0.0015	-0.015	0.0019	1.068e-15	-0.0114	0.0021	9.566e-08	-1.28175	0.199931	not_sig	0.2585	not_sig
LDL	5	74656539	T	C	rs12916	601.851	0	0.4054	0.0688	0.0013	0.0665	0.0017	0	0.0763	0.0019	0	-3.87128	0.000108263	sig	0.02851	not_sig
nonHDL	5	74656539	T	C	rs12916	398.693	0	0.4142	0.0667	0.0015	0.0635	0.0022	2.96e-180	0.0722	0.002	4e-275	-2.93864	0.0032966	not_sig	0.02351	not_sig
TC	5	74656539	T	C	rs12916	545.65	0	0.4048	0.0643	0.0012	0.0611	0.0016	0	0.0727	0.0018	0	-4.85359	1.21245e-06	sig	0.004962	not_sig
HDL	5	75003678	T	C	rs2307111	28.9517	1.12e-29	0.4299	0.0161	0.0013	0.0166	0.0017	5.676e-23	0.0162	0.0019	3.093e-17	0.158193	0.874305	not_sig	0.7488	not_sig
HDL	5	75700310	T	C	rs9293683	10.339	4.58e-11	0.3233	-0.011	0.0014	-0.0124	0.0019	3.06e-11	-0.0083	0.0021	5.641e-05	-1.45977	0.144354	not_sig	0.4317	not_sig
logTG	5	78472599	T	G	rs10052346	11.3474	4.49e-12	0.5735	0.0096	0.0013	0.0105	0.0017	2.966e-10	0.0094	0.0019	7.268e-07	0.434	0.664289	not_sig	0.5086	not_sig
HDL	5	78543716	T	G	rs7733997	8.30745	4.93e-09	0.3817	0.0081	0.0013	0.0083	0.0017	4.643e-07	0.0077	0.0019	5.208e-05	0.237289	0.812433	not_sig	0.4432	not_sig
HDL	5	82815158	A	G	rs115912456	12.8891	1.29e-13	0.0411	0.0273	0.0033	0.0307	0.0043	1.429e-12	0.024	0.0049	9.568e-07	1.03623	0.300096	not_sig	0.02098	not_sig
logTG	5	82815158	A	G	rs115912456	11.7003	1.99e-12	0.041	-0.026	0.0033	-0.0257	0.0043	2.039e-09	-0.0272	0.0048	2.04e-08	0.234134	0.814881	not_sig	0.1112	not_sig
logTG	5	90255685	A	G	rs7704653	8.6335	2.33e-09	0.7158	0.0102	0.0014	0.0084	0.0019	6.935e-06	0.0121	0.0021	6.862e-09	-1.31423	0.188769	not_sig	0.2394	not_sig
HDL	5	96105926	A	G	rs25863	7.67543	2.11e-08	0.5675	-0.008	0.0013	-0.0092	0.0016	1.664e-08	-0.0076	0.0019	4.606e-05	-0.649426	0.516063	not_sig	0.5377	not_sig
logTG	5	107316915	A	G	rs172305	7.30964	4.9e-08	0.6721	0.008	0.0013	0.008	0.0017	3.51e-06	0.0088	0.002	6.968e-06	-0.30656	0.759178	not_sig	0.9795	not_sig
logTG	5	112304202	T	G	rs33568	8.0502	8.91e-09	0.503	0.0087	0.0013	0.0077	0.0016	3.122e-06	0.0094	0.0019	6.098e-07	-0.688395	0.491204	not_sig	0.6078	not_sig
HDL	5	112379659	T	C	rs7732198	8.72181	1.9e-09	0.4465	-0.009	0.0013	-0.0099	0.0017	2.102e-09	-0.0088	0.0019	2.34e-06	-0.43503	0.663541	not_sig	0.5016	not_sig
HDL	5	118729327	A	G	rs1045242	24.7967	1.6e-25	0.2788	0.0159	0.0014	0.0082	0.0018	6.234e-06	0.0266	0.0021	1.738e-37	-6.70733	1.9822e-11	sig	3.413e-10	sig
logTG	5	118729327	A	G	rs1045242	34.0556	8.8e-35	0.2789	-0.019	0.0014	-0.0111	0.0018	7.691e-10	-0.0289	0.0021	4.877e-45	6.47334	9.5863e-11	sig	3.218e-10	sig
LDL	5	122833667	T	C	rs6869704	31.5395	2.89e-32	0.4596	-0.016	0.0013	-0.0162	0.0017	1.091e-22	-0.0169	0.0019	3.725e-19	0.27652	0.782148	not_sig	0.7658	not_sig
nonHDL	5	122833667	T	C	rs6869704	19.3693	4.27e-20	0.4765	-0.014	0.0015	-0.0133	0.0021	4.735e-10	-0.0146	0.002	2.347e-13	0.450199	0.652567	not_sig	0.7125	not_sig
TC	5	122833667	T	C	rs6869704	25.1347	7.33e-26	0.4673	-0.014	0.0012	-0.0134	0.0016	5.738e-18	-0.0144	0.0017	1.761e-16	0.431656	0.665991	not_sig	0.6014	not_sig
HDL	5	127357526	T	C	rs17764730	11.8825	1.31e-12	0.7601	-0.012	0.0015	-0.012	0.002	1.942e-09	-0.0137	0.0022	5.999e-10	0.576516	0.564266	not_sig	0.8431	not_sig
logTG	5	127453735	A	T	rs7734927	8.53851	2.89e-09	0.2374	-0.011	0.0015	-0.0115	0.002	4.665e-09	-0.0106	0.0022	1.57e-06	-0.304491	0.760754	not_sig	0.986	not_sig
HDL	5	129196638	A	T	rs10478901	8.47167	3.38e-09	0.3603	0.0083	0.0013	0.0089	0.0016	7.591e-08	0.0084	0.0019	8.044e-06	0.202946	0.839178	not_sig	0.4629	not_sig
HDL	5	131008194	T	C	rs26008	10.3054	4.95e-11	0.906	0.0182	0.0023	0.0156	0.003	2.408e-07	0.0224	0.0035	1.15e-10	-1.48728	0.136942	not_sig	0.3539	not_sig
logTG	5	131008194	T	C	rs26008	18.3904	4.07e-19	0.9059	-0.024	0.0023	-0.0223	0.003	1.069e-13	-0.027	0.0034	4.548e-15	1.04264	0.297114	not_sig	0.2212	not_sig
nonHDL	5	131781288	A	C	rs7730247	13.8078	1.56e-14	0.2361	-0.015	0.0018	-0.0085	0.0026	0.001177	-0.0189	0.0024	8.033e-15	2.9518	0.00315932	not_sig	0.01213	not_sig
TC	5	131797547	A	G	rs6894249	21.4769	3.34e-22	0.4277	0.0131	0.0012	0.0145	0.0015	8.18e-21	0.0123	0.0018	2.878e-12	0.946071	0.344112	not_sig	0.2791	not_sig
LDL	5	131807624	A	G	rs2057655	28.0078	9.82e-29	0.7695	0.0183	0.0015	0.0146	0.002	9.776e-14	0.0219	0.0023	9.312e-22	-2.41207	0.0158623	not_sig	0.1983	not_sig
HDL	5	132444128	A	G	rs72801474	20.8269	1.49e-21	0.9071	-0.026	0.0024	-0.0256	0.0031	9.045e-17	-0.0244	0.0035	1.395e-12	-0.258782	0.795803	not_sig	0.8365	not_sig
logTG	5	132444128	A	G	rs72801474	31.2186	6.05e-32	0.9071	0.0301	0.0023	0.0257	0.0031	4.19e-17	0.035	0.0034	8.377e-25	-2.0332	0.042032	not_sig	0.05809	not_sig
logTG	5	134136333	T	C	rs2108665	8.00642	9.85e-09	0.8604	-0.014	0.0019	-0.0129	0.0025	3.625e-07	-0.0156	0.0028	2.966e-08	0.723537	0.46935	not_sig	0.5182	not_sig
HDL	5	134444982	A	C	rs254559	10.744	1.8e-11	0.6147	0.0104	0.0013	0.0112	0.0017	1.286e-11	0.0088	0.0019	3.453e-06	0.949156	0.342541	not_sig	0.03652	not_sig
LDL	5	139527721	A	G	rs13179861	8.56885	2.7e-09	0.8171	0.011	0.0016	0.0098	0.0021	4.071e-06	0.0132	0.0024	4.715e-08	-1.07373	0.282943	not_sig	0.8338	not_sig
TC	5	139651321	T	C	rs60714373	13.3693	4.27e-14	0.2151	-0.013	0.0014	-0.0131	0.0019	1.382e-12	-0.0142	0.0021	8.945e-12	0.391409	0.695495	not_sig	0.9546	not_sig
nonHDL	5	139664820	T	C	rs12187444	9.51453	3.06e-10	0.2097	-0.013	0.0018	-0.0144	0.0027	6.597e-08	-0.0126	0.0025	2.824e-07	-0.491268	0.623237	not_sig	0.587	not_sig
logTG	5	140063891	A	AAAAC	rs60987104	9.91567	1.21e-10	0.7612	0.0111	0.0016	0.011	0.002	6.264e-08	0.0109	0.0024	5.4e-06	0.032196	0.974316	not_sig	0.6382	not_sig
HDL	5	141542219	G	GA	rs137859889	11.4755	3.35e-12	0.299	0.0096	0.0015	0.0105	0.0019	1.816e-08	0.0089	0.0022	7.28e-05	0.554955	0.578925	not_sig	0.1079	not_sig
logTG	5	141707225	A	G	rs12523418	7.96815	1.08e-08	0.3361	-0.009	0.0014	-0.0088	0.0018	1.065e-06	-0.0105	0.002	1.892e-07	0.635528	0.525084	not_sig	0.1384	not_sig
LDL	5	141888881	T	C	rs11167778	18.0066	9.85e-19	0.8929	-0.019	0.0021	-0.0154	0.0027	1.346e-08	-0.0238	0.0031	2.224e-14	2.05784	0.0396056	not_sig	0.08875	not_sig
TC	5	141888881	T	C	rs11167778	9.96521	1.08e-10	0.8929	-0.014	0.002	-0.0107	0.0026	5.537e-05	-0.0178	0.003	2.779e-09	1.80214	0.0715233	not_sig	0.3801	not_sig
nonHDL	5	141911176	A	G	rs10077941	9.87486	1.33e-10	0.8675	-0.014	0.0022	-0.0109	0.0032	0.0006743	-0.0164	0.003	2.83e-08	1.25927	0.207934	not_sig	0.1097	not_sig
HDL	5	148844793	T	G	rs35553545	8.2762	5.29e-09	0.7626	0.0098	0.0015	0.0119	0.0019	8.657e-10	0.0065	0.0022	0.002751	1.87297	0.0610719	not_sig	0.08871	not_sig
logTG	5	149353598	A	G	rs245078	8.16315	6.87e-09	0.4342	-0.008	0.0013	-0.0083	0.0017	6.39e-07	-0.0078	0.0019	3.437e-05	-0.197273	0.843614	not_sig	0.5805	not_sig
nonHDL	5	149443298	T	C	rs216140	8.58582	2.6e-09	0.3076	-0.012	0.0017	-0.0088	0.0024	0.0003087	-0.014	0.0022	3.965e-10	1.604	0.108714	not_sig	0.1045	not_sig
HDL	5	153444950	A	G	rs1438588	11.9894	1.02e-12	0.6489	-0.011	0.0013	-0.0112	0.0017	3.149e-11	-0.011	0.002	2.086e-08	-0.0768207	0.938766	not_sig	0.6163	not_sig
nonHDL	5	155581796	A	G	rs185653065	9.43306	3.69e-10	0.0011	0.1702	0.0281	0.0756	0.059	0.1999	0.1723	0.0386	8.083e-06	-1.37693	0.168535	not_sig	0.04773	not_sig
LDL	5	156391628	T	C	rs6874202	155.107	7.81e-156	0.6239	0.0361	0.0013	0.0327	0.0017	2.674e-83	0.042	0.002	1.33e-102	-3.5681	0.000359575	not_sig	0.06612	not_sig
logTG	5	156391628	T	C	rs6874202	140.412	3.87e-141	0.6242	0.0342	0.0013	0.0353	0.0017	5.96e-99	0.0337	0.0019	5.286e-69	0.631272	0.527863	not_sig	0.2038	not_sig
nonHDL	5	156391628	T	C	rs6874202	183.164	6.85e-184	0.6424	0.0463	0.0015	0.0469	0.0022	4.62e-98	0.0471	0.0021	9.31e-115	-0.0660417	0.947345	not_sig	0.9252	not_sig
TC	5	156391628	T	C	rs6874202	246.296	5.06e-247	0.6297	0.0438	0.0012	0.0418	0.0016	4e-149	0.0479	0.0018	5.21e-153	-2.55232	0.0107008	not_sig	0.2518	not_sig
logTG	5	158011435	C	G	rs2914231	42.7002	1.99e-43	0.7262	-0.022	0.0014	-0.0195	0.0019	9.658e-26	-0.0244	0.0021	3.566e-30	1.74046	0.0817775	not_sig	0.0483	not_sig
HDL	5	158020425	A	G	rs1651274	33.3605	4.36e-34	0.2727	-0.019	0.0014	-0.0189	0.0018	4.944e-25	-0.0198	0.0021	5.463e-21	0.328076	0.742854	not_sig	0.911	not_sig
HDL	5	158622532	A	C	rs55801554	10.369	4.28e-11	0.7265	-0.011	0.0014	-0.0105	0.0018	1.124e-08	-0.0117	0.0021	1.391e-08	0.437434	0.661796	not_sig	0.7273	not_sig
HDL	5	170612546	A	G	rs2339234	9.50855	3.1e-10	0.3008	0.0105	0.0014	0.0123	0.0018	9.758e-12	0.0075	0.002	0.0002169	1.79869	0.0720672	not_sig	0.2899	not_sig
HDL	5	172591337	T	G	rs8543	8.14256	7.2e-09	0.1248	0.0127	0.002	0.0146	0.0026	1.88e-08	0.0115	0.0029	7.796e-05	0.802514	0.422256	not_sig	0.3941	not_sig
HDL	5	173356752	C	G	rs72812818	9.46148	3.46e-10	0.7108	0.0108	0.0014	0.0141	0.0018	9.759e-15	0.0068	0.0021	0.001003	2.66106	0.00778952	not_sig	0.0009433	not_sig
logTG	5	173356752	C	G	rs72812818	8.7966	1.6e-09	0.7083	-0.01	0.0014	-0.0131	0.0018	6.164e-13	-0.0062	0.0021	0.002821	-2.50933	0.0120962	not_sig	0.006525	not_sig
LDL	5	176522036	T	C	rs31778	7.94421	1.14e-08	0.6968	0.0096	0.0014	0.0101	0.0018	2.907e-08	0.0094	0.0021	1.089e-05	0.25488	0.798816	not_sig	0.9133	not_sig
HDL	5	176551103	A	C	rs78523677	16.3472	4.5e-17	0.7952	-0.016	0.0017	-0.0161	0.0022	1.161e-13	-0.0178	0.0024	2.152e-13	0.526487	0.59855	not_sig	0.84	not_sig
logTG	5	176629546	A	G	rs4976677	17.5206	3.02e-18	0.2341	0.015	0.0016	0.0123	0.002	9.359e-10	0.0184	0.0023	9.794e-16	-2.0131	0.0441037	not_sig	0.08797	not_sig
TC	5	180308441	T	C	rs188238483	8.47041	3.39e-09	0.009	-0.042	0.0074	-0.0385	0.0096	6.337e-05	-0.0392	0.0108	0.0002817	0.0488149	0.961067	not_sig	0.9856	not_sig
HDL	5	180349778	T	C	rs138692142	16.0918	8.09e-17	0.9912	0.0724	0.0077	0.0832	0.0101	1.83e-16	0.0537	0.0115	2.737e-06	1.94334	0.0519756	not_sig	0.07989	not_sig
logTG	6	7247344	A	C	rs35742417	7.95562	1.11e-08	0.8195	0.0116	0.0017	0.0127	0.0022	3.902e-09	0.0107	0.0025	1.671e-05	0.604105	0.545774	not_sig	0.8634	not_sig
LDL	6	11842824	A	G	rs113251986	13.7295	1.86e-14	0.8832	0.0206	0.0024	0.0169	0.003	2.482e-08	0.0275	0.0036	1.944e-14	-2.27795	0.0227298	not_sig	0.5734	not_sig
nonHDL	6	11865597	T	C	rs34451811	13.1561	6.98e-14	0.0955	-0.024	0.0029	-0.0181	0.0043	2.376e-05	-0.0268	0.0038	1.397e-12	1.52255	0.127872	not_sig	0.0885	not_sig
TC	6	11868682	T	C	rs4713979	17.2051	6.24e-18	0.7579	-0.013	0.0015	-0.0125	0.0019	4.676e-11	-0.0132	0.0021	4.159e-10	0.249079	0.8033	not_sig	0.251	not_sig
LDL	6	16126934	A	G	rs7746081	98.3678	4.29e-99	0.623	0.0295	0.0013	0.0263	0.0017	3.507e-52	0.035	0.002	9.816e-69	-3.3379	0.000844131	not_sig	0.2723	not_sig
nonHDL	6	16131156	T	C	rs2235215	67.8018	1.58e-68	0.3774	-0.03	0.0016	-0.0274	0.0023	4.83e-33	-0.0305	0.0021	3.1e-46	0.999607	0.317501	not_sig	0.3053	not_sig
TC	6	16131156	T	C	rs2235215	78.0643	8.62e-79	0.3877	-0.026	0.0013	-0.022	0.0017	1.924e-40	-0.0296	0.0019	3.12e-56	3.00385	0.00266584	not_sig	0.3551	not_sig
HDL	6	16810627	T	G	rs1262925	12.326	4.72e-13	0.6561	-0.012	0.0014	-0.0111	0.0018	3.241e-10	-0.0121	0.002	2.139e-09	0.374728	0.707863	not_sig	0.9765	not_sig
logTG	6	18747705	T	G	rs6924805	9.36434	4.32e-10	0.3909	0.0091	0.0013	0.009	0.0017	7.26e-08	0.0107	0.0019	1.31e-08	-0.670727	0.502395	not_sig	0.934	not_sig
nonHDL	6	18747705	T	G	rs6924805	10.9068	1.24e-11	0.3861	0.012	0.0015	0.0123	0.0022	1.939e-08	0.0124	0.002	7.893e-10	-0.0337774	0.973055	not_sig	0.8065	not_sig
TC	6	18747705	T	G	rs6924805	10.9015	1.25e-11	0.3854	0.01	0.0012	0.0104	0.0016	8.453e-11	0.0101	0.0018	1.611e-08	0.125524	0.900109	not_sig	0.1187	not_sig
LDL	6	18757805	T	C	rs12189754	8.3222	4.76e-09	0.6636	-0.01	0.0014	-0.0083	0.0018	6.171e-06	-0.0109	0.0022	6.457e-07	0.921108	0.356994	not_sig	0.9651	not_sig
LDL	6	20413721	A	G	rs9368188	8.90048	1.26e-09	0.6696	0.0093	0.0013	0.0102	0.0017	5.401e-09	0.0087	0.002	1.045e-05	0.575501	0.564953	not_sig	0.2064	not_sig
nonHDL	6	20413721	A	G	rs9368188	12.091	8.11e-13	0.6631	0.0121	0.0015	0.0149	0.0022	1.451e-11	0.0093	0.0021	5.492e-06	1.84917	0.0644336	not_sig	0.08414	not_sig
TC	6	20413721	A	G	rs9368188	17.0347	9.23e-18	0.6683	0.012	0.0013	0.0133	0.0016	2.981e-16	0.0107	0.0018	2.931e-09	1.08787	0.276651	not_sig	0.09373	not_sig
logTG	6	20665549	A	G	rs7748382	11.963	1.09e-12	0.6553	-0.011	0.0013	-0.0103	0.0017	1.74e-09	-0.0125	0.0019	1.185e-10	0.867999	0.385395	not_sig	0.462	not_sig
LDL	6	21384613	A	G	rs9466056	8.57214	2.68e-09	0.6216	0.0094	0.0013	0.01	0.0017	1.803e-09	0.0074	0.0019	0.0001049	1.02708	0.304385	not_sig	0.3493	not_sig
TC	6	21385702	T	C	rs4710973	8.26958	5.38e-09	0.6324	0.0089	0.0012	0.0097	0.0016	6.653e-10	0.0077	0.0018	1.542e-05	0.836826	0.40269	not_sig	0.3527	not_sig
nonHDL	6	21391282	T	C	rs10946458	7.66394	2.17e-08	0.3277	-0.011	0.0016	-0.0114	0.0023	7.053e-07	-0.0103	0.0022	1.748e-06	-0.347094	0.728521	not_sig	0.806	not_sig
LDL	6	22343592	A	G	rs113760175	10.0658	8.59e-11	0.9365	0.021	0.0028	0.0219	0.0036	9.919e-10	0.0188	0.0041	5.154e-06	0.572204	0.567184	not_sig	0.6367	not_sig
TC	6	22343592	A	G	rs113760175	13.0465	8.98e-14	0.9368	0.0227	0.0027	0.0253	0.0035	4.559e-13	0.0197	0.0039	6.114e-07	1.07686	0.281541	not_sig	0.3878	not_sig
LDL	6	25314597	A	G	rs181058325	17.4222	3.78e-18	0.0655	-0.027	0.0028	-0.0285	0.0036	4.232e-15	-0.0265	0.004	3.569e-11	-0.374299	0.708182	not_sig	0.7847	not_sig
nonHDL	6	25314597	A	G	rs181058325	9.04494	9.02e-10	0.068	-0.023	0.0032	-0.0231	0.0048	1.483e-06	-0.0225	0.0043	1.611e-07	-0.0935018	0.925505	not_sig	0.8324	not_sig
TC	6	25314597	A	G	rs181058325	14.1009	7.93e-15	0.0656	-0.024	0.0027	-0.0235	0.0035	2.899e-11	-0.0243	0.0038	2.251e-10	0.156044	0.875998	not_sig	0.606	not_sig
LDL	6	25918225	T	C	rs80215559	88.9972	1.01e-89	0.0648	-0.058	0.0028	-0.0643	0.0036	1.836e-71	-0.0509	0.004	9.653e-37	-2.5078	0.0121485	not_sig	0.001276	not_sig
nonHDL	6	25918225	T	C	rs80215559	47.6588	2.19e-48	0.0663	-0.051	0.0033	-0.0607	0.0049	7.436e-35	-0.0427	0.0043	4.865e-23	-2.77283	0.0055571	not_sig	0.006538	not_sig
TC	6	25918225	T	C	rs80215559	69.8994	1.26e-70	0.0648	-0.051	0.0027	-0.0557	0.0035	1.758e-56	-0.0444	0.0039	1.379e-30	-2.17296	0.0297836	not_sig	0.004463	not_sig
logTG	6	26167951	C	G	rs9379828	8.45909	3.47e-09	0.3375	-0.008	0.0013	-0.0103	0.0017	2.081e-09	-0.0059	0.002	0.002912	-1.68608	0.0917801	not_sig	0.04495	not_sig
HDL	6	26200677	A	G	rs806794	8.90824	1.24e-09	0.3365	0.0098	0.0013	0.0097	0.0017	2.05e-08	0.0099	0.002	7.51e-07	-0.0768207	0.938766	not_sig	0.8319	not_sig
LDL	6	27067657	A	T	rs35657082	29.3589	4.38e-30	0.0749	-0.033	0.0026	-0.0393	0.0034	1.013e-30	-0.0279	0.0039	6.037e-13	-2.219	0.026487	not_sig	0.04816	not_sig
nonHDL	6	27067657	A	T	rs35657082	12.2448	5.69e-13	0.0764	-0.026	0.0032	-0.0324	0.0047	6.964e-12	-0.0225	0.0042	6.662e-08	-1.57734	0.114717	not_sig	0.1937	not_sig
TC	6	27067657	A	T	rs35657082	24.2189	6.04e-25	0.0749	-0.029	0.0026	-0.0347	0.0033	2.309e-25	-0.0263	0.0037	1.787e-12	-1.7073	0.0877669	not_sig	0.1363	not_sig
HDL	6	28052823	A	C	rs1321505	10.4717	3.38e-11	0.129	-0.013	0.0019	-0.0137	0.0024	1.226e-08	-0.0136	0.0027	6.648e-07	-0.027911	0.977733	not_sig	0.3014	not_sig
logTG	6	28394680	T	C	rs13201681	11.2849	5.19e-12	0.9079	0.0183	0.0024	0.022	0.0031	1.08e-12	0.0151	0.0034	1.178e-05	1.50851	0.131425	not_sig	0.8494	not_sig
TC	6	28785085	T	C	rs3118362	18.9841	1.04e-19	0.0819	-0.027	0.0026	-0.0302	0.0033	1.844e-19	-0.0269	0.0038	8.264e-13	-0.660702	0.508803	not_sig	0.5378	not_sig
logTG	6	29549653	C	G	rs1233393	14.6106	2.45e-15	0.0996	-0.021	0.0024	-0.0256	0.0031	5.708e-17	-0.0167	0.0035	1.326e-06	-1.91476	0.0555226	not_sig	0.693	not_sig
nonHDL	6	29850784	A	G	rs113360274	16.5395	2.89e-17	0.2568	0.0187	0.0019	0.0185	0.0026	2.227e-12	0.0235	0.0026	6.557e-20	-1.36566	0.172045	not_sig	0.188	not_sig
HDL	6	29915061	T	C	rs2248162	8.68523	2.06e-09	0.6791	0.0105	0.0014	0.0111	0.0018	1.37e-09	0.011	0.0022	4.002e-07	0.0354673	0.971707	not_sig	0.2984	not_sig
LDL	6	29935250	A	G	rs3893464	22.4433	3.6e-23	0.5228	-0.015	0.0013	-0.0149	0.0017	6.867e-19	-0.0152	0.002	1.319e-14	0.1151	0.908366	not_sig	0.5107	not_sig
TC	6	30073847	T	C	rs2844795	28.081	8.3e-29	0.4374	-0.016	0.0013	-0.017	0.0017	2.664e-24	-0.0165	0.0019	1.588e-17	-0.197622	0.843341	not_sig	0.6007	not_sig
logTG	6	30074072	C	G	rs2517601	18.1604	6.91e-19	0.898	0.0229	0.0026	0.0254	0.0032	3.369e-15	0.0183	0.0042	1.647e-05	1.35235	0.176264	not_sig	0.8417	not_sig
nonHDL	6	30597083	T	C	rs56248798	11.855	1.4e-12	0.9597	-0.036	0.0044	-0.0322	0.0061	1.551e-07	-0.045	0.0059	1.87e-14	1.51476	0.129833	not_sig	0.09957	not_sig
HDL	6	30764907	A	G	rs1264377	10.5797	2.63e-11	0.8517	0.0147	0.0019	0.0147	0.0024	1.002e-09	0.0184	0.0029	1.232e-10	-0.990964	0.321703	not_sig	0.6233	not_sig
logTG	6	30798697	T	C	rs1264347	31.1038	7.87e-32	0.886	0.0246	0.0022	0.0277	0.0028	1.318e-23	0.0225	0.0032	1.33e-12	1.23013	0.218649	not_sig	0.9768	not_sig
nonHDL	6	31106459	A	C	rs1265097	26.1999	6.31e-27	0.906	-0.03	0.0026	-0.028	0.0037	4.792e-14	-0.0368	0.0035	3.395e-26	1.73523	0.0827008	not_sig	0.2269	not_sig
TC	6	31263510	T	C	rs2524143	53.6251	2.37e-54	0.744	0.023	0.0015	0.0226	0.0019	9.644e-34	0.0252	0.0021	1.148e-32	-0.925149	0.354888	not_sig	0.1614	not_sig
HDL	6	31302029	A	G	rs4947249	33.8143	1.53e-34	0.3566	-0.018	0.0014	-0.0202	0.0017	9.533e-32	-0.017	0.002	3.601e-17	-1.22913	0.219023	not_sig	0.006657	not_sig
logTG	6	31326289	A	G	rs9378248	78.9809	1.05e-79	0.5807	-0.024	0.0013	-0.0272	0.0017	2.386e-59	-0.0232	0.0019	1.218e-32	-1.57818	0.114524	not_sig	0.05043	not_sig
logTG	6	31878495	A	G	rs622871	64.1327	7.37e-65	0.7232	0.0269	0.0015	0.0286	0.0019	1.627e-49	0.0276	0.0022	1.712e-36	0.34603	0.72932	not_sig	0.5715	not_sig
LDL	6	31885930	T	C	rs3128759	28.2169	6.07e-29	0.336	-0.017	0.0014	-0.0159	0.0018	7.907e-19	-0.0193	0.0021	1.73e-20	1.23799	0.215721	not_sig	0.3731	not_sig
nonHDL	6	31885930	T	C	rs3128759	30.8947	1.27e-31	0.3387	-0.02	0.0017	-0.0222	0.0023	3.12e-21	-0.0214	0.0022	1.817e-21	-0.252432	0.800707	not_sig	0.7177	not_sig
TC	6	31885930	T	C	rs3128759	49.253	5.58e-50	0.3322	-0.021	0.0013	-0.0221	0.0017	3.227e-37	-0.0216	0.002	4.986e-28	-0.191937	0.847791	not_sig	0.7202	not_sig
logTG	6	32441696	T	C	rs2071805	103.529	2.96e-104	0.9363	-0.063	0.0028	-0.0666	0.0037	2.196e-74	-0.0654	0.0043	1.485e-52	-0.212779	0.831499	not_sig	0.271	not_sig
TC	6	32590735	T	C	rs35062987	124.602	2.5e-125	0.7991	-0.04	0.0016	-0.0401	0.002	2.35e-89	-0.0423	0.0024	1.74e-70	0.709553	0.477981	not_sig	0.5391	not_sig
HDL	6	32596370	T	C	rs73728888	22.0095	9.78e-23	0.9461	0.0378	0.0035	0.035	0.0045	7.526e-15	0.044	0.0049	3.421e-19	-1.36405	0.172553	not_sig	0.5152	not_sig
nonHDL	6	32627700	A	G	rs6689	95.2142	6.11e-96	0.1985	0.045	0.0021	0.0435	0.003	2.013e-47	0.0482	0.0027	5.487e-69	-1.16947	0.242215	not_sig	0.2459	not_sig
LDL	6	32657201	A	T	rs35282906	92.4132	3.86e-93	0.8809	-0.043	0.002	-0.0408	0.0026	5.152e-57	-0.0489	0.003	3.545e-60	2.05485	0.0398935	not_sig	0.2312	not_sig
HDL	6	34141700	A	C	rs148889882	20.6416	2.28e-21	0.9695	0.0416	0.0039	0.0414	0.0052	1.268e-15	0.0445	0.0057	8.068e-15	-0.40512	0.685389	not_sig	0.4746	not_sig
logTG	6	34247047	T	C	rs77136196	8.20614	6.22e-09	0.9633	-0.024	0.0036	-0.0159	0.0047	0.0006967	-0.0378	0.0052	2.831e-13	3.14287	0.00167299	not_sig	0.001127	not_sig
LDL	6	34616322	C	G	rs3800461	27.2933	5.09e-28	0.8865	0.0244	0.0021	0.0218	0.0027	3.727e-16	0.0279	0.003	5.657e-20	-1.52215	0.127972	not_sig	0.1497	not_sig
nonHDL	6	34616322	C	G	rs3800461	14.3219	4.77e-15	0.8872	0.0218	0.0024	0.0202	0.0036	1.503e-08	0.0248	0.0033	5.491e-14	-0.945949	0.344175	not_sig	0.513	not_sig
TC	6	34616322	C	G	rs3800461	57.9412	1.14e-58	0.887	0.0346	0.002	0.0318	0.0026	2.922e-34	0.039	0.0029	1.213e-40	-1.86278	0.0624928	not_sig	0.2422	not_sig
HDL	6	34658080	A	C	rs2744944	85.4814	3.3e-86	0.6159	0.027	0.0013	0.0302	0.0017	4.369e-72	0.0243	0.0019	5.528e-37	2.33334	0.0196303	not_sig	0.00331	not_sig
logTG	6	35237153	T	C	rs6934083	8.6592	2.19e-09	0.8779	-0.015	0.0029	-0.0123	0.0036	0.0006773	-0.0184	0.0045	4.698e-05	1.06464	0.28704	not_sig	0.9969	not_sig
HDL	6	35476562	A	T	rs11754612	11.1008	7.93e-12	0.8912	0.0167	0.0021	0.0192	0.0027	2.887e-12	0.0125	0.0031	5.929e-05	1.64324	0.100332	not_sig	0.588	not_sig
nonHDL	6	35508531	A	G	rs11759543	7.86878	1.35e-08	0.937	0.0217	0.0032	0.0141	0.0045	0.001694	0.026	0.0042	8.142e-10	-1.94152	0.0521955	not_sig	0.08331	not_sig
HDL	6	36477260	A	G	rs7772800	9.04548	9.01e-10	0.7694	0.0109	0.0015	0.0144	0.0019	1.302e-13	0.006	0.0022	0.006472	2.91352	0.00357383	not_sig	0.02198	not_sig
logTG	6	36645968	C	G	rs730506	8.75517	1.76e-09	0.7977	0.0111	0.0015	0.0117	0.002	4.648e-09	0.0121	0.0023	1.583e-07	-0.132007	0.894979	not_sig	0.7746	not_sig
nonHDL	6	37029684	A	C	rs9296208	14.6229	2.38e-15	0.5566	-0.014	0.0015	-0.0139	0.0022	4.28e-10	-0.015	0.002	1.776e-13	0.371552	0.710227	not_sig	0.1694	not_sig
LDL	6	37037818	T	TA	rs11380614	14.697	2.01e-15	0.5376	-0.013	0.0014	-0.0117	0.0017	9.085e-12	-0.0142	0.0021	1.065e-11	0.931783	0.351448	not_sig	0.2355	not_sig
TC	6	37038432	A	G	rs913499	28.8462	1.43e-29	0.5461	-0.016	0.0012	-0.0146	0.0016	5.486e-20	-0.0173	0.0018	5.633e-22	1.12972	0.258596	not_sig	0.1741	not_sig
LDL	6	39238772	T	C	rs11759627	7.71825	1.91e-08	0.6938	-0.009	0.0014	-0.0092	0.0018	5.374e-07	-0.0107	0.0021	3.531e-07	0.546171	0.584948	not_sig	0.864	not_sig
TC	6	39238772	T	C	rs11759627	8.44075	3.62e-09	0.6937	-0.01	0.0014	-0.0089	0.0018	6.846e-07	-0.0121	0.002	1.853e-09	1.19841	0.230758	not_sig	0.5461	not_sig
nonHDL	6	40962537	A	T	rs143069752	10.472	3.37e-11	0.9325	0.0221	0.003	0.0194	0.0044	1.07e-05	0.0226	0.004	2.235e-08	-0.540439	0.588894	not_sig	0.8645	not_sig
logTG	6	40998167	T	C	rs742493	14.9366	1.16e-15	0.1107	-0.018	0.002	-0.0163	0.0026	4.761e-10	-0.02	0.003	1.538e-11	0.93749	0.348507	not_sig	0.4445	not_sig
HDL	6	41986427	T	C	rs142449754	26.9066	1.24e-27	0.7651	0.0166	0.0015	0.0159	0.0019	6.803e-17	0.0191	0.0022	1.361e-18	-1.10991	0.267037	not_sig	0.7577	not_sig
logTG	6	42839062	A	G	rs7747505	8.01496	9.66e-09	0.3077	0.0099	0.0015	0.0104	0.0019	2.018e-08	0.0088	0.0022	4.559e-05	0.553647	0.57982	not_sig	0.8578	not_sig
nonHDL	6	42934620	T	C	rs3818554	11.3398	4.57e-12	0.4847	0.012	0.0015	0.0126	0.0022	5.593e-09	0.0129	0.002	1.294e-10	-0.101332	0.919287	not_sig	0.8101	not_sig
LDL	6	42940673	A	G	rs2395943	19.3544	4.42e-20	0.5822	-0.013	0.0013	-0.0143	0.0017	2.502e-17	-0.0129	0.0019	1.747e-11	-0.553041	0.580236	not_sig	0.15	not_sig
HDL	6	42940810	T	C	rs9296406	28.5521	2.8e-29	0.5261	0.0155	0.0013	0.0146	0.0016	5.729e-19	0.0172	0.0019	3.09e-20	-1.05532	0.29128	not_sig	0.9864	not_sig
LDL	6	43756169	T	C	rs9472125	7.87945	1.32e-08	0.8906	0.0143	0.0022	0.009	0.0028	0.001544	0.0207	0.0032	8.489e-11	-2.77117	0.00558544	not_sig	0.112	not_sig
logTG	6	43757896	A	C	rs998584	158.09	8.13e-159	0.5235	-0.036	0.0013	-0.0375	0.0017	1.68e-112	-0.0367	0.0019	2.305e-80	-0.315636	0.752279	not_sig	0.614	not_sig
nonHDL	6	43757896	A	C	rs998584	39.7701	1.7e-40	0.5151	-0.022	0.0015	-0.0188	0.0023	1.706e-16	-0.0254	0.0021	1.162e-34	2.1282	0.0333209	not_sig	0.07145	not_sig
TC	6	43757896	A	C	rs998584	8.75894	1.74e-09	0.5246	-0.009	0.0013	-0.007	0.0016	2.099e-05	-0.0134	0.0019	1.137e-12	2.59616	0.00942732	not_sig	0.05514	not_sig
HDL	6	43760327	C	G	rs11967262	116.056	8.79e-117	0.482	-0.031	0.0013	-0.033	0.0016	5.9e-92	-0.0299	0.0019	1.241e-56	-1.25826	0.208297	not_sig	0.04947	not_sig
LDL	6	52458678	C	G	rs9367489	19.6072	2.47e-20	0.6559	0.0137	0.0013	0.0124	0.0017	6.525e-13	0.0163	0.002	6.539e-17	-1.4963	0.134575	not_sig	0.1371	not_sig
TC	6	52458678	C	G	rs9367489	16.6541	2.22e-17	0.6597	0.0122	0.0013	0.0113	0.0016	3.742e-12	0.0145	0.0018	1.063e-15	-1.33892	0.180596	not_sig	0.2482	not_sig
HDL	6	52627165	A	G	rs2749013	17.4513	3.54e-18	0.6681	0.0135	0.0013	0.012	0.0018	6.195e-12	0.0154	0.002	9.292e-15	-1.27407	0.202637	not_sig	0.4733	not_sig
logTG	6	52630269	A	C	rs6458869	37.6265	2.36e-38	0.342	0.0184	0.0013	0.0155	0.0017	1.902e-19	0.0223	0.002	2.657e-30	-2.60576	0.00916701	not_sig	0.1839	not_sig
nonHDL	6	52643065	A	G	rs2894801	16.5572	2.77e-17	0.4054	0.0149	0.0016	0.0146	0.0023	1.413e-10	0.0144	0.0021	7.475e-12	0.0644908	0.948579	not_sig	0.8233	not_sig
nonHDL	6	53508265	T	G	rs6458949	19.0021	9.95e-20	0.7455	-0.017	0.0017	-0.0158	0.0024	8.051e-11	-0.0162	0.0023	5.815e-13	0.120848	0.903812	not_sig	0.583	not_sig
LDL	6	53509035	C	G	rs12662589	17.9374	1.16e-18	0.7517	-0.014	0.0015	-0.0144	0.0019	2.999e-14	-0.0136	0.0021	2.197e-10	-0.284506	0.776022	not_sig	0.1906	not_sig
TC	6	53509035	C	G	rs12662589	18.5902	2.57e-19	0.7544	-0.014	0.0014	-0.0138	0.0018	2.305e-14	-0.0141	0.002	1.959e-12	0.112351	0.910545	not_sig	0.6374	not_sig
logTG	6	86296925	CA	C	rs398085093	12.245	5.69e-13	0.4084	0.0106	0.0014	0.0103	0.0018	5.043e-09	0.0121	0.0021	6.898e-09	-0.654607	0.512721	not_sig	0.4022	not_sig
HDL	6	86302034	A	G	rs2842611	8.30964	4.9e-09	0.4812	-0.009	0.0013	-0.009	0.0016	2.316e-08	-0.0089	0.0018	1.283e-06	-0.0418665	0.966605	not_sig	0.692	not_sig
TC	6	88166740	T	C	rs146824639	8.05673	8.78e-09	0.2867	0.0098	0.0014	0.0098	0.0018	2.379e-08	0.0094	0.0021	4.913e-06	0.145724	0.884139	not_sig	0.3974	not_sig
HDL	6	98566506	CT	C	rs77910749	10.8451	1.43e-11	0.4462	0.0104	0.0013	0.0108	0.0017	1.77e-10	0.0114	0.002	1.485e-08	-0.230462	0.817733	not_sig	0.8258	not_sig
nonHDL	6	100600097	T	C	rs17789218	26.5184	3.03e-27	0.2236	-0.022	0.0019	-0.0179	0.0027	7.66e-11	-0.0268	0.0025	2.598e-26	2.42905	0.0151385	not_sig	0.03875	not_sig
LDL	6	100602753	A	G	rs9496567	31.323	4.75e-32	0.766	0.0189	0.0015	0.0168	0.002	2.078e-17	0.0231	0.0023	8.032e-24	-2.08165	0.0373746	not_sig	0.1365	not_sig
logTG	6	100613551	T	C	rs9496614	9.74237	1.81e-10	0.235	-0.012	0.0015	-0.0058	0.002	0.003053	-0.0197	0.0023	3.49e-18	4.58724	4.49152e-06	sig	0.001677	not_sig
TC	6	100613551	T	C	rs9496614	34.8692	1.35e-35	0.2347	-0.02	0.0015	-0.0191	0.0019	4.409e-23	-0.0212	0.0022	4.575e-22	0.727943	0.466648	not_sig	0.8624	not_sig
nonHDL	6	101431977	T	C	rs12524934	13.3489	4.48e-14	0.5535	-0.012	0.0015	-0.0105	0.0021	1.022e-06	-0.0123	0.002	6.247e-10	0.623352	0.533053	not_sig	0.7156	not_sig
TC	6	101431977	T	C	rs12524934	18.5032	3.14e-19	0.556	-0.012	0.0012	-0.0115	0.0016	2.027e-13	-0.0145	0.0017	1.048e-16	1.29497	0.195331	not_sig	0.7005	not_sig
LDL	6	101432314	A	G	rs1358756	16.2629	5.46e-17	0.448	0.0122	0.0013	0.0115	0.0017	4.713e-12	0.013	0.0019	5.687e-12	-0.592544	0.553487	not_sig	0.5458	not_sig
LDL	6	106378009	T	G	rs6913325	11.9046	1.25e-12	0.5788	0.0107	0.0013	0.0087	0.0017	1.975e-07	0.0141	0.0019	8.789e-14	-2.13316	0.0329119	not_sig	0.5375	not_sig
logTG	6	106378009	T	G	rs6913325	8.81622	1.53e-09	0.58	0.0091	0.0013	0.0083	0.0016	4.318e-07	0.0108	0.0019	6.726e-09	-1.01235	0.311373	not_sig	0.4956	not_sig
nonHDL	6	106378009	T	G	rs6913325	16.0119	9.73e-17	0.5739	0.014	0.0015	0.0148	0.0022	1.85e-11	0.0147	0.002	4.588e-13	0.0337774	0.973055	not_sig	0.5201	not_sig
TC	6	106378009	T	G	rs6913325	11.7439	1.8e-12	0.579	0.0103	0.0012	0.0087	0.0016	8.582e-08	0.0129	0.0018	1.171e-12	-1.75734	0.0788607	not_sig	0.6361	not_sig
logTG	6	107432157	A	C	rs35045014	16.2332	5.85e-17	0.5457	-0.012	0.0013	-0.0126	0.0017	6.567e-14	-0.0113	0.0019	6.08e-09	-0.512909	0.608015	not_sig	0.8508	not_sig
HDL	6	107444903	C	G	rs60033497	7.3392	4.58e-08	0.7019	-0.009	0.0014	-0.0086	0.0018	1.771e-06	-0.0096	0.0021	4.314e-06	0.364529	0.715463	not_sig	0.9176	not_sig
HDL	6	109064220	T	C	rs565216100	10.4408	3.62e-11	0.8493	-0.017	0.0022	-0.017	0.0029	2.738e-09	-0.02	0.0033	2.219e-09	0.688522	0.491124	not_sig	0.7688	not_sig
logTG	6	109189021	C	G	rs9480889	16.5299	2.95e-17	0.7786	0.0143	0.0015	0.015	0.002	1.909e-14	0.0143	0.0022	1.581e-10	0.236826	0.812792	not_sig	0.8449	not_sig
TC	6	109300661	T	C	rs11153143	11.2263	5.94e-12	0.8786	0.0153	0.0019	0.0154	0.0024	2.348e-10	0.0143	0.0027	1.841e-07	0.306836	0.758968	not_sig	0.2121	not_sig
LDL	6	109323519	T	G	rs2273668	8.93963	1.15e-09	0.878	0.0137	0.002	0.0149	0.0026	6.682e-09	0.0112	0.0029	0.0001256	0.956743	0.338697	not_sig	0.07158	not_sig
HDL	6	109639710	C	G	rs4946955	29.2441	5.7e-30	0.3252	-0.016	0.0013	-0.0157	0.0017	7.1e-20	-0.0172	0.0019	1.334e-18	0.593222	0.553032	not_sig	0.7903	not_sig
TC	6	116316882	T	G	rs3822855	53.4738	3.36e-54	0.5681	-0.021	0.0012	-0.0204	0.0016	1.328e-38	-0.0212	0.0018	3.435e-33	0.334731	0.737828	not_sig	0.4993	not_sig
HDL	6	116327493	A	G	rs1538385	26.7808	1.66e-27	0.4322	0.0157	0.0013	0.0166	0.0017	9.436e-24	0.0153	0.0019	3.599e-16	0.514126	0.607164	not_sig	0.1984	not_sig
nonHDL	6	116349041	T	C	rs6918059	23.643	2.28e-24	0.6095	0.0175	0.0016	0.0214	0.0023	3.583e-21	0.0157	0.0021	5.856e-14	1.83799	0.0660643	not_sig	0.4387	not_sig
LDL	6	116394819	A	T	rs13194714	31.9122	1.22e-32	0.6059	0.0169	0.0013	0.0201	0.0017	8.478e-33	0.0136	0.0019	2.224e-12	2.56769	0.0102379	not_sig	0.003046	not_sig
LDL	6	126873423	T	G	rs9388498	11.1685	6.78e-12	0.7943	0.0132	0.0017	0.0129	0.0023	1.617e-08	0.0152	0.0025	1.133e-09	-0.681897	0.495304	not_sig	0.7869	not_sig
TC	6	126873423	T	G	rs9388498	13.8266	1.49e-14	0.7903	0.0144	0.0016	0.0144	0.0022	3.872e-11	0.015	0.0024	2.025e-10	-0.185707	0.852675	not_sig	0.8383	not_sig
HDL	6	127437617	T	C	rs2800708	42.1866	6.51e-43	0.4581	0.0185	0.0012	0.0141	0.0016	7.676e-19	0.0245	0.0018	4.957e-42	-4.35411	1.33608e-05	sig	8.007e-05	sig
nonHDL	6	127439897	C	G	rs141783576	24.1305	7.4e-25	0.9291	-0.039	0.0035	-0.0139	0.0051	0.006357	-0.0602	0.0046	1.088e-38	6.77017	1.28635e-11	sig	3.856e-11	sig
logTG	6	127440047	T	C	rs577721086	57.0525	8.86e-58	0.0512	0.0527	0.0031	0.0296	0.0041	3.882e-13	0.085	0.0045	2.902e-80	-9.15409	5.48186e-20	sig	8.382e-16	sig
logTG	6	130354855	T	C	rs9388766	16.2708	5.36e-17	0.6898	0.0115	0.0013	0.012	0.0017	6.76e-12	0.0118	0.002	4.097e-09	0.0766401	0.93891	not_sig	0.7326	not_sig
nonHDL	6	130364482	T	C	rs4895864	13.0713	8.49e-14	0.4167	-0.012	0.0015	-0.0119	0.0021	3.262e-08	-0.0127	0.002	3.038e-10	0.277045	0.781745	not_sig	0.7169	not_sig
LDL	6	130367863	T	TA	rs11407151	10.0473	8.97e-11	0.6499	0.0092	0.0014	0.0099	0.0018	4.696e-08	0.0095	0.0022	1.433e-05	0.141709	0.88731	not_sig	0.297	not_sig
TC	6	130371055	T	C	rs3890746	9.80592	1.56e-10	0.4305	-0.009	0.0012	-0.0102	0.0016	1.022e-10	-0.0085	0.0018	2.238e-06	-0.711302	0.476897	not_sig	0.3314	not_sig
HDL	6	131931092	T	C	rs2245133	13.0196	9.56e-14	0.1919	-0.014	0.0016	-0.0144	0.0021	5.237e-12	-0.0134	0.0024	1.76e-08	-0.316164	0.751878	not_sig	0.348	not_sig
LDL	6	135418916	A	G	rs7776054	63.4458	3.58e-64	0.2602	-0.025	0.0014	-0.0286	0.0019	1.352e-53	-0.0191	0.0021	1.439e-19	-3.37851	0.000728786	not_sig	0.001556	not_sig
nonHDL	6	135418916	A	G	rs7776054	45.2659	5.42e-46	0.2638	-0.025	0.0017	-0.031	0.0025	2.263e-35	-0.0208	0.0023	5.688e-20	-3.01545	0.00256599	not_sig	0.01054	not_sig
TC	6	135418916	A	G	rs7776054	79.4332	3.69e-80	0.2598	-0.027	0.0014	-0.0306	0.0018	9.834e-64	-0.0216	0.002	1.991e-26	-3.37052	0.000750259	not_sig	0.0003406	not_sig
HDL	6	135428537	A	C	rs7758845	12.0726	8.46e-13	0.2856	-0.012	0.0014	-0.0147	0.0018	4.041e-17	-0.0074	0.002	0.0001997	-2.73551	0.00622832	not_sig	4.307e-05	sig
HDL	6	137082948	A	G	rs6924387	17.3899	4.08e-18	0.4283	-0.013	0.0013	-0.0143	0.0016	3.046e-18	-0.0115	0.0018	5.408e-10	-1.17226	0.241092	not_sig	0.0425	not_sig
HDL	6	139261477	A	G	rs2750415	14.0838	8.25e-15	0.1922	0.0141	0.0016	0.0154	0.0021	7.445e-14	0.0123	0.0023	1.297e-07	1.00361	0.315565	not_sig	0.1503	not_sig
LDL	6	139331253	A	G	rs62441843	26.373	4.24e-27	0.1753	0.0206	0.0017	0.0176	0.0022	3.212e-15	0.023	0.0025	1.089e-19	-1.63308	0.102452	not_sig	0.04936	not_sig
nonHDL	6	139331253	A	G	rs62441843	18.0049	9.89e-19	0.1743	0.0204	0.002	0.0161	0.003	6.888e-08	0.0228	0.0027	4.734e-17	-1.66711	0.0954919	not_sig	0.009507	not_sig
TC	6	139331253	A	G	rs62441843	26.1603	6.91e-27	0.1735	0.0199	0.0017	0.0182	0.0022	4.191e-17	0.0217	0.0024	1.821e-19	-1.08329	0.278679	not_sig	0.1008	not_sig
LDL	6	139831981	T	C	rs635769	8.57592	2.66e-09	0.5975	-0.008	0.0013	-0.0028	0.0017	0.0915	-0.0152	0.0019	1.3e-15	4.89836	9.66398e-07	sig	2.069e-05	sig
nonHDL	6	139835329	A	T	rs2982521	25.1193	7.6e-26	0.5821	-0.017	0.0015	-0.0107	0.0022	7.431e-07	-0.0229	0.002	3.779e-30	4.12085	3.77484e-05	sig	0.0001213	sig
TC	6	139835329	A	T	rs2982521	9.54065	2.88e-10	0.5806	-0.009	0.0012	-0.0056	0.0016	0.000377	-0.0125	0.0018	1.425e-12	2.88705	0.00388872	not_sig	0.01191	not_sig
HDL	6	139835498	T	C	rs17585887	48.0869	8.19e-49	0.5469	0.0201	0.0012	0.0159	0.0016	4.601e-23	0.0264	0.0018	3.392e-47	-4.39598	1.10275e-05	sig	0.0001043	not_sig
logTG	6	139835498	T	C	rs17585887	80.7405	1.82e-81	0.5535	-0.026	0.0012	-0.0212	0.0016	8.026e-39	-0.0329	0.0019	1.081e-70	4.73778	2.16073e-06	sig	5.93e-06	sig
logTG	6	140360260	A	T	rs36126113	10.994	1.01e-11	0.7785	0.0123	0.0016	0.0109	0.002	1.07e-07	0.0146	0.0023	1.259e-10	-1.22106	0.222062	not_sig	0.1827	not_sig
TC	6	143268110	C	G	rs9399414	8.67277	2.12e-09	0.6982	0.0096	0.0013	0.008	0.0017	1.984e-06	0.0108	0.0019	8.984e-09	-1.10668	0.268431	not_sig	0.1216	not_sig
LDL	6	151015562	A	G	rs9480534	7.6625	2.18e-08	0.0924	-0.015	0.0022	-0.0157	0.0029	7.828e-08	-0.013	0.0033	8.016e-05	-0.618962	0.535941	not_sig	0.6822	not_sig
LDL	6	151898506	T	C	rs1871859	16.6792	2.09e-17	0.81	-0.017	0.0018	-0.0194	0.0023	3.307e-17	-0.0135	0.0026	1.827e-07	-1.71175	0.0869429	not_sig	0.02885	not_sig
nonHDL	6	151898506	T	C	rs1871859	13.4011	3.97e-14	0.7987	-0.017	0.0021	-0.0212	0.003	1.847e-12	-0.0139	0.0028	5.691e-07	-1.78652	0.0740147	not_sig	0.03021	not_sig
TC	6	151898506	T	C	rs1871859	22.6004	2.51e-23	0.8111	-0.019	0.0017	-0.0208	0.0022	1.362e-20	-0.0149	0.0025	2.175e-09	-1.78526	0.0742192	not_sig	0.02445	not_sig
LDL	6	153043035	A	G	rs17710008	7.44823	3.56e-08	0.8325	-0.011	0.0017	-0.0105	0.0022	2.732e-06	-0.0117	0.0025	3.619e-06	0.362907	0.716675	not_sig	0.564	not_sig
HDL	6	153462557	A	G	rs1281951	19.7393	1.82e-20	0.3957	0.0137	0.0013	0.0121	0.0017	7.772e-13	0.0166	0.0019	5e-18	-1.77967	0.0751305	not_sig	0.01651	not_sig
logTG	6	153463135	A	C	rs685162	10.6288	2.35e-11	0.6015	0.0096	0.0013	0.0076	0.0017	5.894e-06	0.012	0.0019	2.828e-10	-1.736	0.0825641	not_sig	0.003646	not_sig
LDL	6	160492613	T	C	rs2297359	85.9293	1.18e-86	0.0587	0.0662	0.0039	0.0654	0.0051	1.013e-37	0.0759	0.0058	1.17e-38	-1.36919	0.17094	not_sig	0.09468	not_sig
logTG	6	160501825	A	G	rs78425119	28.8062	1.56e-29	0.9354	-0.034	0.0027	-0.033	0.0035	9.947e-21	-0.0373	0.0039	2.741e-21	0.825415	0.409136	not_sig	0.535	not_sig
nonHDL	6	160501825	A	G	rs78425119	68.2192	6.04e-69	0.9354	-0.06	0.0032	-0.0584	0.0048	5.438e-34	-0.0612	0.0043	1.022e-45	0.436342	0.662589	not_sig	0.9874	not_sig
TC	6	160501825	A	G	rs78425119	64.9054	1.24e-65	0.9357	-0.048	0.0026	-0.0476	0.0035	1.402e-42	-0.0521	0.0038	3.1e-42	0.877747	0.380081	not_sig	0.6621	not_sig
TC	6	161005610	T	C	rs55730499	302.215	6.09e-303	0.9325	-0.1	0.0026	-0.0824	0.0034	2.01e-131	-0.1252	0.0038	1.05e-242	8.45822	2.71492e-17	sig	2.485e-11	sig
HDL	6	161008646	A	G	rs41272086	128.437	3.65e-129	0.9009	0.057	0.0023	0.054	0.003	1.201e-73	0.0616	0.0033	6.194e-78	-1.71824	0.085752	not_sig	0.2087	not_sig
logTG	6	161008646	A	G	rs41272086	55.9015	1.25e-56	0.9005	-0.038	0.0022	-0.0367	0.0029	1.008e-35	-0.0394	0.0032	7.675e-34	0.628899	0.529415	not_sig	0.8774	not_sig
LDL	6	161010118	A	G	rs10455872	366.047	0	0.0677	0.1137	0.0027	0.0995	0.0035	2.06e-179	0.1358	0.004	1.76e-257	-6.8782	6.06144e-12	sig	6.675e-08	sig
nonHDL	6	161010118	A	G	rs10455872	219.916	1.21e-220	0.0685	0.1049	0.0032	0.0857	0.0047	2.963e-74	0.1231	0.0043	1.66e-183	-5.89616	3.72055e-09	sig	2.835e-10	sig
logTG	6	161520837	A	G	rs1464780	9.49502	3.2e-10	0.053	-0.023	0.003	-0.025	0.0039	2.151e-10	-0.0215	0.0043	6.465e-07	-0.606471	0.544202	not_sig	0.3857	not_sig
HDL	6	161588372	T	C	rs147829643	10.8027	1.58e-11	0.9639	0.0301	0.0037	0.0261	0.005	1.888e-07	0.0352	0.0054	6.569e-11	-1.2468	0.212471	not_sig	0.4409	not_sig
LDL	6	161659369	C	G	rs148349043	40.5123	3.07e-41	0.0135	0.0861	0.006	0.0858	0.0078	1.784e-28	0.0896	0.009	3.692e-23	-0.321335	0.747957	not_sig	0.7533	not_sig
nonHDL	6	161659369	C	G	rs148349043	23.4223	3.78e-24	0.0133	0.0805	0.0073	0.0827	0.0108	1.864e-14	0.0798	0.0097	2.115e-16	0.200625	0.840992	not_sig	0.5757	not_sig
TC	6	161659369	C	G	rs148349043	29.1402	7.24e-30	0.0135	0.0722	0.0058	0.0726	0.0075	6.79e-22	0.0744	0.0086	6.547e-18	-0.15895	0.873708	not_sig	0.7322	not_sig
HDL	6	163033350	A	G	rs13191362	8.74226	1.81e-09	0.117	0.0133	0.002	0.0106	0.0026	5.874e-05	0.0157	0.003	1.624e-07	-1.29527	0.195227	not_sig	0.173	not_sig
HDL	6	163745049	A	G	rs7761309	13.3112	4.88e-14	0.4693	-0.011	0.0013	-0.0108	0.0016	3.507e-11	-0.0128	0.0019	1.128e-11	0.811782	0.416917	not_sig	0.9807	not_sig
logTG	6	164113762	A	G	rs73029263	15.7018	1.99e-16	0.1341	-0.018	0.0019	-0.0151	0.0025	8.284e-10	-0.0199	0.0028	5.181e-13	1.28629	0.198342	not_sig	0.353	not_sig
HDL	7	1051664	T	C	rs10233430	35.8125	1.54e-36	0.4315	-0.017	0.0013	-0.0151	0.0016	5.972e-21	-0.0196	0.0018	1.053e-26	1.88399	0.0595663	not_sig	0.8201	not_sig
LDL	7	1067906	T	C	rs2362529	37.2539	5.57e-38	0.2144	-0.021	0.0015	-0.0209	0.002	1.388e-25	-0.0217	0.0023	2.23e-21	0.264336	0.791521	not_sig	0.9108	not_sig
nonHDL	7	1067906	T	C	rs2362529	19.1564	6.98e-20	0.2108	-0.018	0.0018	-0.0185	0.0026	9.168e-13	-0.0192	0.0024	1.225e-15	0.198679	0.842514	not_sig	0.6835	not_sig
TC	7	1067906	T	C	rs2362529	48.4219	3.79e-49	0.214	-0.023	0.0015	-0.0223	0.0019	9.35e-33	-0.0244	0.0021	3.943e-31	0.747236	0.454921	not_sig	0.5791	not_sig
HDL	7	2296552	A	G	rs144787122	8.8434	1.43e-09	0.0036	0.0882	0.0122	0.0911	0.016	1.266e-08	0.0911	0.018	4.32e-07	0	1	not_sig	0.574	not_sig
LDL	7	2296552	A	G	rs144787122	15.2408	5.74e-16	0.0036	0.11	0.0121	0.0959	0.0158	1.406e-09	0.13	0.018	4.636e-13	-1.43388	0.151606	not_sig	0.1516	not_sig
nonHDL	7	2296552	A	G	rs144787122	7.37078	4.26e-08	0.0036	0.0986	0.015	0.0612	0.0223	0.006174	0.1294	0.02	1.047e-10	-2.28648	0.022226	not_sig	0.0781	not_sig
TC	7	2296552	A	G	rs144787122	18.1698	6.76e-19	0.0036	0.1177	0.0118	0.1036	0.0155	2.58e-11	0.1404	0.0173	4.529e-16	-1.59646	0.110386	not_sig	0.136	not_sig
logTG	7	5567596	T	C	rs852424	8.3209	4.78e-09	0.669	-0.009	0.0013	-0.0069	0.0017	6.3e-05	-0.0105	0.002	1.226e-07	1.37952	0.167734	not_sig	0.4505	not_sig
HDL	7	6461310	T	C	rs79949326	66.5875	2.59e-67	0.7541	-0.027	0.0014	-0.028	0.0019	2.357e-50	-0.0286	0.0021	5.271e-42	0.213625	0.83084	not_sig	0.529	not_sig
TC	7	6461310	T	C	rs79949326	21.4842	3.28e-22	0.7544	-0.015	0.0014	-0.0132	0.0018	3.241e-13	-0.018	0.002	2.218e-19	1.79761	0.0722386	not_sig	0.4011	not_sig
LDL	7	8471545	T	C	rs115942176	7.60828	2.46e-08	0.9952	-0.126	0.039	-0.1597	0.0463	0.0005675	-0.1015	0.0729	0.1642	-0.678293	0.497586	not_sig	0.81	not_sig
HDL	7	12267552	A	G	rs4721060	14.4922	3.22e-15	0.5446	0.0113	0.0012	0.0119	0.0016	1.02e-13	0.0104	0.0018	1.28e-08	0.627997	0.530006	not_sig	0.7407	not_sig
logTG	7	12268082	CTTAA	C	rs34046032	10.3906	4.07e-11	0.4554	0.0095	0.0013	0.012	0.0017	1.103e-12	0.0073	0.002	0.0002687	1.80104	0.0716964	not_sig	0.1498	not_sig
HDL	7	15903403	A	T	rs38189	8.44452	3.59e-09	0.6147	0.0088	0.0013	0.0074	0.0016	4.284e-06	0.01	0.0019	6.012e-08	-1.05532	0.29128	not_sig	0.3094	not_sig
logTG	7	15913588	A	C	rs38205	14.7339	1.85e-15	0.6168	-0.012	0.0013	-0.0127	0.0017	3.198e-14	-0.0122	0.0019	1.479e-10	-0.197273	0.843614	not_sig	0.176	not_sig
nonHDL	7	17284577	T	C	rs4410790	10.2197	6.03e-11	0.6	0.0116	0.0015	0.0112	0.0023	7.701e-07	0.0122	0.0021	5.198e-09	-0.322454	0.747109	not_sig	0.9636	not_sig
HDL	7	17287106	A	G	rs6968554	13.5881	2.58e-14	0.6124	-0.012	0.0013	-0.0084	0.0017	6.854e-07	-0.0159	0.0019	2.063e-16	2.96611	0.00301591	not_sig	0.05324	not_sig
logTG	7	17287998	A	G	rs2106727	18.1169	7.64e-19	0.6102	0.0132	0.0013	0.0111	0.0017	2.989e-11	0.0167	0.0019	1.65e-18	-2.20945	0.0271432	not_sig	0.6201	not_sig
logTG	7	17817037	A	G	rs2723509	18.9193	1.2e-19	0.55	-0.013	0.0013	-0.0164	0.0017	1.191e-22	-0.0095	0.0019	5.501e-07	-2.72236	0.00648173	not_sig	0.01403	not_sig
HDL	7	17920613	T	C	rs10242866	71.9796	1.05e-72	0.5722	0.0248	0.0013	0.0247	0.0016	3.788e-52	0.0261	0.0019	4.672e-45	-0.568248	0.569867	not_sig	0.6336	not_sig
TC	7	17920613	T	C	rs10242866	16.4588	3.48e-17	0.5719	0.011	0.0012	0.0096	0.0016	8.148e-10	0.0127	0.0018	4.709e-13	-1.29708	0.194603	not_sig	0.2981	not_sig
LDL	7	21605973	A	G	rs55696093	107.899	1.26e-108	0.2038	0.0367	0.0016	0.0334	0.0021	8.372e-58	0.0432	0.0023	8.461e-77	-3.16907	0.00152926	not_sig	0.06857	not_sig
logTG	7	21605973	A	G	rs55696093	9.06552	8.6e-10	0.2036	0.0109	0.0016	0.0103	0.0021	6.335e-07	0.0119	0.0023	2.078e-07	-0.516764	0.605321	not_sig	0.299	not_sig
nonHDL	7	21605973	A	G	rs55696093	89.361	4.36e-90	0.2119	0.0381	0.0018	0.0375	0.0026	7.524e-48	0.0406	0.0024	5.508e-64	-0.879862	0.378934	not_sig	0.3018	not_sig
TC	7	21605973	A	G	rs55696093	112.018	9.6e-113	0.2103	0.0357	0.0015	0.0331	0.0019	4.234e-67	0.0398	0.0021	6.184e-80	-2.38404	0.0171238	not_sig	0.249	not_sig
LDL	7	25991826	T	C	rs4722551	79.6585	2.2e-80	0.1567	0.0354	0.0018	0.0327	0.0023	4.508e-46	0.0385	0.0026	2.251e-48	-1.68274	0.0924262	not_sig	0.5952	not_sig
logTG	7	25991826	T	C	rs4722551	48.6623	2.18e-49	0.1569	-0.028	0.0017	-0.0246	0.0023	2.271e-27	-0.0338	0.0026	4.879e-39	2.6659	0.0076782	not_sig	0.08691	not_sig
nonHDL	7	25991826	T	C	rs4722551	26.8206	1.51e-27	0.1569	0.0248	0.0021	0.0202	0.0031	4.821e-11	0.0281	0.0028	4.219e-23	-1.89924	0.0575323	not_sig	0.1065	not_sig
TC	7	25991826	T	C	rs4722551	44.1956	6.37e-45	0.1566	0.0258	0.0017	0.0216	0.0022	4.374e-22	0.0309	0.0025	1.664e-34	-2.81405	0.0048921	not_sig	0.1236	not_sig
HDL	7	26397239	A	C	rs1534696	26.7431	1.81e-27	0.4287	-0.015	0.0013	-0.0106	0.0017	1.754e-10	-0.0211	0.0019	4.309e-29	4.15256	3.28783e-05	sig	9.717e-05	not_sig
logTG	7	28180556	T	C	rs864745	10.4789	3.32e-11	0.462	-0.009	0.0012	-0.0107	0.0016	4.655e-11	-0.0079	0.0018	1.774e-05	-1.16949	0.242207	not_sig	0.3805	not_sig
LDL	7	28215361	C	G	rs3735569	11.1499	7.08e-12	0.8489	-0.016	0.002	-0.0188	0.0027	3.251e-12	-0.0138	0.003	5.135e-06	-1.24766	0.212155	not_sig	0.01855	not_sig
nonHDL	7	28215361	C	G	rs3735569	11.0775	8.37e-12	0.8087	-0.018	0.0023	-0.0227	0.0032	6.313e-13	-0.0137	0.003	6.549e-06	-2.06062	0.0393396	not_sig	0.1126	not_sig
TC	7	28215361	C	G	rs3735569	10.9547	1.11e-11	0.8156	-0.015	0.0019	-0.0186	0.0024	4.05e-15	-0.013	0.0026	7.452e-07	-1.59484	0.110748	not_sig	0.00992	not_sig
HDL	7	35671204	CATATATAAATATATATAA	C	rs71553019	7.53712	2.9e-08	0.3221	-0.01	0.0015	-0.0091	0.0018	6.797e-07	-0.0109	0.0022	1.009e-06	0.638411	0.523206	not_sig	0.9257	not_sig
TC	7	36170409	T	C	rs34578041	15.5344	2.92e-16	0.4323	0.0112	0.0012	0.0111	0.0016	1.382e-12	0.0107	0.0017	9.394e-10	0.172663	0.862917	not_sig	0.6831	not_sig
LDL	7	36171953	T	C	rs12533280	20.6137	2.43e-21	0.8043	-0.017	0.0016	-0.0157	0.0021	3.343e-14	-0.0185	0.0024	3.997e-15	0.88425	0.376562	not_sig	0.3152	not_sig
nonHDL	7	36190426	T	C	rs11771125	18.5931	2.55e-19	0.8141	-0.019	0.0019	-0.0193	0.0027	1.499e-12	-0.0166	0.0025	7.245e-11	-0.736903	0.461182	not_sig	0.4338	not_sig
HDL	7	36192606	T	G	rs12533197	26.759	1.74e-27	0.4235	-0.016	0.0013	-0.0169	0.0016	8.241e-25	-0.0142	0.0019	3.202e-14	-1.09591	0.27312	not_sig	0.2592	not_sig
HDL	7	38265179	CTTGAAAAGACAACCTTTCCCCATTGTACTGAT	C	rs138994411	21.5199	3.02e-22	0.4702	0.0143	0.0013	0.0163	0.0017	4.83e-22	0.0133	0.002	3.025e-11	1.15231	0.249194	not_sig	0.1895	not_sig
LDL	7	41746922	C	G	rs7808613	9.35817	4.38e-10	0.2397	0.0113	0.0015	0.011	0.002	2.52e-08	0.0115	0.0022	2.762e-07	-0.169369	0.865506	not_sig	0.6868	not_sig
nonHDL	7	41746922	C	G	rs7808613	9.56932	2.7e-10	0.2436	0.013	0.0017	0.0145	0.0025	3.699e-09	0.0118	0.0023	4.211e-07	0.798207	0.42475	not_sig	0.5827	not_sig
TC	7	41764992	T	C	rs995124	10.0394	9.13e-11	0.7602	-0.011	0.0014	-0.0115	0.0019	1.392e-09	-0.0111	0.0021	1.023e-07	-0.142331	0.886819	not_sig	0.8512	not_sig
logTG	7	44197583	T	G	rs2070971	44.1849	6.53e-45	0.8169	-0.025	0.0017	-0.0239	0.0022	5.366e-27	-0.0261	0.0026	1.541e-24	0.649722	0.515872	not_sig	0.8879	not_sig
LDL	7	44581986	T	C	rs17725246	122.745	1.8e-123	0.2152	0.0377	0.0016	0.0354	0.002	8.019e-68	0.0444	0.0024	9.008e-78	-2.90116	0.00371787	not_sig	0.03232	not_sig
nonHDL	7	44581986	T	C	rs17725246	98.9149	1.22e-99	0.2173	0.0394	0.0019	0.0391	0.0027	4.653e-47	0.0423	0.0025	9e-64	-0.873366	0.382464	not_sig	0.3619	not_sig
TC	7	44581986	T	C	rs17725246	111.63	2.34e-112	0.2149	0.0349	0.0015	0.0331	0.002	1.115e-62	0.0409	0.0023	3.294e-72	-2.57868	0.009918	not_sig	0.06395	not_sig
TC	7	50308527	T	C	rs876038	9.22032	6.02e-10	0.6858	-0.009	0.0013	-0.0072	0.0017	1.481e-05	-0.0125	0.0019	1.525e-11	2.09479	0.0361894	not_sig	0.01168	not_sig
HDL	7	50308811	C	G	rs876039	27.0647	8.62e-28	0.688	-0.017	0.0013	-0.015	0.0017	3.961e-18	-0.0209	0.002	1.885e-26	2.26621	0.0234385	not_sig	0.2127	not_sig
HDL	7	72330303	T	C	rs35753501	7.4139	3.86e-08	0.9748	-0.03	0.0046	-0.0259	0.0062	2.721e-05	-0.0368	0.0066	2.391e-08	1.21372	0.224856	not_sig	0.5986	not_sig
LDL	7	73020301	T	C	rs799157	12.9856	1.03e-13	0.9644	-0.03	0.0037	-0.0198	0.0049	6.036e-05	-0.0446	0.0054	7.875e-17	3.42538	0.000613943	not_sig	0.06738	not_sig
nonHDL	7	73020301	T	C	rs799157	40.4792	3.32e-41	0.9641	-0.062	0.0043	-0.0547	0.0063	6.706e-18	-0.0704	0.0058	3.192e-34	1.84125	0.0655844	not_sig	0.04102	not_sig
TC	7	73020301	T	C	rs799157	23.5551	2.79e-24	0.9643	-0.04	0.0036	-0.036	0.0048	6.413e-14	-0.049	0.0051	1.029e-21	1.87051	0.0614129	not_sig	0.1843	not_sig
logTG	7	73020337	C	G	rs3812316	808.784	0	0.1191	-0.123	0.0019	-0.1197	0.0025	0	-0.1313	0.0028	0	3.10853	0.0018802	not_sig	0.19	not_sig
HDL	7	73037366	A	G	rs55747707	102.79	1.62e-103	0.815	-0.037	0.0016	-0.0373	0.0021	2.805e-71	-0.0399	0.0024	1.296e-63	0.822027	0.411062	not_sig	0.2777	not_sig
HDL	7	74361240	T	C	rs112924314	11.7976	1.59e-12	0.9474	0.0252	0.0031	0.0261	0.0041	1.487e-10	0.0254	0.0045	1.461e-08	0.11594	0.9077	not_sig	0.9874	not_sig
nonHDL	7	75612803	T	C	rs41301394	14.8838	1.31e-15	0.7004	-0.015	0.0016	-0.0137	0.0023	2.724e-09	-0.0166	0.0022	1.408e-14	0.915066	0.360157	not_sig	0.2237	not_sig
TC	7	75612803	T	C	rs41301394	13.1171	7.64e-14	0.7066	-0.012	0.0013	-0.0111	0.0017	4.871e-11	-0.0129	0.0019	8.356e-12	0.711439	0.476812	not_sig	0.9768	not_sig
LDL	7	75614777	A	G	rs2302429	11.0561	8.79e-12	0.8052	-0.013	0.0016	-0.0105	0.0021	5.843e-07	-0.0159	0.0024	2.291e-11	1.70534	0.0881313	not_sig	0.5131	not_sig
logTG	7	75615006	T	C	rs1057868	13.5202	3.02e-14	0.7089	-0.012	0.0014	-0.0111	0.0018	4.251e-10	-0.0145	0.002	7.611e-13	1.27106	0.203709	not_sig	0.9278	not_sig
TC	7	77340821	A	T	rs56400413	7.73051	1.86e-08	0.7334	-0.009	0.0014	-0.0095	0.0018	6.346e-08	-0.0067	0.002	0.0006291	-1.04861	0.294359	not_sig	0.0656	not_sig
HDL	7	80300449	T	G	rs3211938	42.1181	7.62e-43	0.0844	0.1321	0.0084	0.0969	0.0105	2.258e-20	0.1954	0.014	4.84e-44	-5.67359	1.39835e-08	sig	0.05715	not_sig
HDL	7	80851648	C	G	rs74705598	11.6983	2e-12	0.9574	-0.098	0.0115	-0.0848	0.0141	1.993e-09	-0.1209	0.0194	4.679e-10	1.51718	0.129221	not_sig	0.2136	not_sig
TC	7	81568750	T	G	rs1229498	10.9077	1.24e-11	0.7266	-0.011	0.0014	-0.0113	0.0018	2.5e-10	-0.0116	0.002	7.004e-09	0.112351	0.910545	not_sig	0.8939	not_sig
logTG	7	81573045	A	T	rs1229499	10.9857	1.03e-11	0.2893	0.0105	0.0014	0.009	0.0018	6.995e-07	0.0131	0.002	1.646e-10	-1.53274	0.125339	not_sig	0.1484	not_sig
nonHDL	7	87074964	T	C	rs1468615	7.3087	4.91e-08	0.1937	-0.013	0.0019	-0.0081	0.0028	0.003568	-0.0181	0.0026	1.349e-12	2.62833	0.00858057	not_sig	0.004532	not_sig
LDL	7	87076587	A	C	rs1014283	13.6122	2.44e-14	0.776	0.0137	0.0016	0.0127	0.002	3.13e-10	0.0165	0.0024	2.134e-12	-1.22493	0.2206	not_sig	0.1254	not_sig
TC	7	87076587	A	C	rs1014283	15.3765	4.2e-16	0.7762	0.0144	0.0015	0.0125	0.002	2.001e-10	0.0175	0.0023	9.754e-15	-1.653	0.0983315	not_sig	0.1639	not_sig
HDL	7	94953895	A	G	rs705379	9.16669	6.81e-10	0.5498	0.0091	0.0013	0.0059	0.0016	0.0003315	0.0119	0.0018	1.053e-10	-2.51199	0.0120053	not_sig	0.001088	not_sig
TC	7	94953895	A	G	rs705379	7.8692	1.35e-08	0.5488	0.0084	0.0012	0.0065	0.0016	4.422e-05	0.0096	0.0017	3.875e-08	-1.33813	0.180853	not_sig	0.1433	not_sig
nonHDL	7	97915637	A	G	rs6967728	17.9283	1.18e-18	0.8006	0.019	0.0019	0.0178	0.0027	3.25e-11	0.0208	0.0025	9.659e-17	-0.818781	0.412912	not_sig	0.2925	not_sig
LDL	7	97977268	A	G	rs112758337	22.2736	5.33e-23	0.8099	0.0187	0.0017	0.0166	0.0022	9.776e-14	0.0213	0.0024	9.684e-19	-1.45391	0.145971	not_sig	0.2459	not_sig
TC	7	97977268	A	G	rs112758337	21.3345	4.63e-22	0.8051	0.0173	0.0016	0.014	0.002	5.732e-12	0.0191	0.0022	2.601e-18	-1.72851	0.0838972	not_sig	0.07218	not_sig
LDL	7	100280896	A	C	rs221793	30.8276	1.49e-31	0.9025	-0.029	0.0023	-0.0287	0.003	8.993e-22	-0.0286	0.0033	9.511e-18	-0.0225826	0.981983	not_sig	0.2633	not_sig
nonHDL	7	100280896	A	C	rs221793	23.103	7.89e-24	0.8995	-0.029	0.0027	-0.0303	0.004	2.28e-14	-0.026	0.0036	4.369e-13	-0.802454	0.422291	not_sig	0.4912	not_sig
TC	7	100280896	A	C	rs221793	29.2812	5.23e-30	0.9028	-0.027	0.0022	-0.0278	0.0029	1.306e-21	-0.0268	0.0032	6.225e-17	-0.233339	0.815498	not_sig	0.1956	not_sig
nonHDL	7	100873835	A	G	rs10250685	8.38527	4.12e-09	0.2751	-0.011	0.0017	-0.0126	0.0024	1.169e-07	-0.0093	0.0022	2.129e-05	-1.01792	0.308714	not_sig	0.1858	not_sig
TC	7	100873835	A	G	rs10250685	8.11489	7.68e-09	0.2818	-0.009	0.0013	-0.0096	0.0017	2.956e-08	-0.0079	0.0019	4.306e-05	-0.671915	0.501638	not_sig	0.2747	not_sig
HDL	7	101886704	A	G	rs427534	7.90723	1.24e-08	0.4259	0.0083	0.0013	0.0093	0.0017	7.638e-08	0.0082	0.0019	1.935e-05	0.43503	0.663541	not_sig	0.9163	not_sig
TC	7	101928279	A	G	rs803073	8.03083	9.31e-09	0.544	0.0087	0.0012	0.0093	0.0016	1.129e-08	0.0082	0.0018	6.728e-06	0.460254	0.645334	not_sig	0.4008	not_sig
LDL	7	104638501	A	C	rs10264718	7.96455	1.09e-08	0.2363	-0.013	0.0018	-0.0126	0.0023	5.846e-08	-0.0122	0.0027	6.029e-06	-0.113576	0.909574	not_sig	0.8363	not_sig
HDL	7	106801395	C	G	rs257378	13.6409	2.29e-14	0.1911	0.0145	0.0016	0.0115	0.0021	5.798e-08	0.0182	0.0024	3.299e-14	-2.1183	0.0341497	not_sig	0.313	not_sig
logTG	7	106835410	T	C	rs2283038	8.06087	8.69e-09	0.7676	0.0098	0.0015	0.007	0.002	0.0005586	0.0125	0.0022	1.417e-08	-1.86078	0.0627758	not_sig	0.09214	not_sig
nonHDL	7	106946195	C	G	rs2299421	8.14046	7.24e-09	0.3245	0.0104	0.0016	0.0098	0.0023	2.066e-05	0.0112	0.0021	1.808e-07	-0.451435	0.651676	not_sig	0.8551	not_sig
LDL	7	107056795	A	G	rs10248717	15.2605	5.49e-16	0.3478	0.013	0.0014	0.0112	0.0018	4.225e-10	0.0156	0.002	1.47e-14	-1.64691	0.0995756	not_sig	0.148	not_sig
TC	7	107056795	A	G	rs10248717	7.66368	2.17e-08	0.3562	0.0091	0.0013	0.0073	0.0017	1.222e-05	0.0107	0.0019	7.249e-09	-1.34383	0.179004	not_sig	0.3186	not_sig
logTG	7	107624109	T	C	rs6970946	9.03502	9.23e-10	0.9102	0.0162	0.0022	0.0172	0.0028	9.749e-10	0.0135	0.0032	2.893e-05	0.875284	0.38142	not_sig	0.222	not_sig
TC	7	116305314	CA	C	rs138340572	7.37161	4.25e-08	0.1858	0.0095	0.0018	0.0092	0.0022	2.798e-05	0.0114	0.0026	1.521e-05	-0.650863	0.515135	not_sig	0.5199	not_sig
logTG	7	116399131	A	G	rs10215153	12.6312	2.34e-13	0.6933	-0.011	0.0014	-0.0119	0.0018	1.938e-11	-0.0116	0.002	1.028e-08	-0.112152	0.910703	not_sig	0.5129	not_sig
HDL	7	116982907	A	G	rs10229792	15.6359	2.31e-16	0.61	0.0122	0.0013	0.0113	0.0017	9.964e-12	0.0122	0.0019	8.033e-11	-0.355933	0.72189	not_sig	0.6021	not_sig
logTG	7	116982907	A	G	rs10229792	17.0652	8.61e-18	0.6122	-0.013	0.0013	-0.013	0.0017	9.746e-15	-0.0123	0.0019	9.053e-11	-0.276182	0.782409	not_sig	0.7192	not_sig
LDL	7	127015083	A	G	rs62621812	7.84664	1.42e-08	0.9769	-0.029	0.0045	-0.0282	0.0059	1.558e-06	-0.0365	0.0067	4.748e-08	0.93633	0.349103	not_sig	0.9061	not_sig
TC	7	130275219	A	G	rs147138679	8.31828	4.81e-09	0.8043	0.0094	0.0016	0.012	0.002	3.899e-09	0.0062	0.0024	0.01008	1.87064	0.0613949	not_sig	0.1217	not_sig
HDL	7	130429186	A	T	rs13234269	101.319	4.8e-102	0.539	-0.029	0.0013	-0.0189	0.0016	7.677e-31	-0.043	0.0019	3.23e-119	9.78198	1.34555e-22	sig	3.819e-17	sig
logTG	7	130429186	A	T	rs13234269	73.1955	6.38e-74	0.5345	0.0245	0.0013	0.0137	0.0017	1.273e-16	0.0383	0.0019	4.62e-93	-9.70581	2.84808e-22	sig	4.208e-19	sig
nonHDL	7	130432538	A	T	rs13241165	20.9464	1.13e-21	0.4681	-0.016	0.0015	-0.0063	0.0021	0.002812	-0.0234	0.002	3.243e-32	5.92185	3.18349e-09	sig	2.026e-08	sig
LDL	7	130442141	C	G	rs6467314	9.92308	1.19e-10	0.3144	0.0099	0.0014	0.0051	0.0018	0.004616	0.0165	0.002	3.708e-16	-4.26701	1.98114e-05	sig	0.0001495	not_sig
HDL	7	137561861	A	G	rs73729085	8.68426	2.07e-09	0.0778	-0.051	0.0068	-0.0537	0.0085	3.041e-10	-0.0469	0.0109	1.545e-05	-0.495929	0.619944	not_sig	0.5654	not_sig
LDL	7	137561861	A	G	rs73729085	21.1035	7.88e-22	0.08	-0.076	0.007	-0.0768	0.0089	5.221e-18	-0.0748	0.0116	1.146e-10	-0.137738	0.890447	not_sig	0.175	not_sig
TC	7	137561861	A	G	rs73729085	26.7677	1.71e-27	0.076	-0.082	0.0067	-0.0814	0.0083	1.266e-22	-0.0859	0.0103	9.339e-17	0.342755	0.731783	not_sig	0.1519	not_sig
HDL	7	139036598	T	G	rs10273527	9.03955	9.13e-10	0.7125	-0.011	0.0015	-0.0104	0.0019	5.782e-08	-0.0124	0.0022	1.597e-08	0.693694	0.487874	not_sig	0.9874	not_sig
logTG	7	149180625	C	G	rs6949316	7.45416	3.51e-08	0.2519	-0.009	0.0015	-0.0088	0.0019	5.715e-06	-0.0104	0.0022	2.019e-06	0.553647	0.57982	not_sig	0.7853	not_sig
logTG	7	150214465	T	G	rs7808446	18.5429	2.87e-19	0.7585	-0.014	0.0015	-0.0128	0.0019	1.274e-11	-0.0167	0.0022	1.182e-14	1.34952	0.177171	not_sig	0.1314	not_sig
HDL	7	150537635	A	G	rs62492368	26.8099	1.55e-27	0.6388	0.0155	0.0013	0.0151	0.0017	3.53e-19	0.017	0.0019	1.04e-18	-0.751415	0.452403	not_sig	0.3653	not_sig
nonHDL	7	155024830	A	G	rs10279638	12.8129	1.54e-13	0.8525	-0.021	0.0025	-0.0201	0.0036	2.791e-08	-0.0218	0.0034	1.884e-10	0.344784	0.730257	not_sig	0.5704	not_sig
TC	7	155024830	A	G	rs10279638	17.6982	2e-18	0.8682	-0.021	0.0021	-0.0196	0.0027	7.342e-13	-0.0218	0.0031	1.3e-12	0.53925	0.589715	not_sig	0.953	not_sig
LDL	7	155026807	T	C	rs4374942	13.4856	3.27e-14	0.1347	0.0188	0.0021	0.0167	0.0028	1.882e-09	0.0219	0.0032	7.441e-12	-1.23163	0.218086	not_sig	0.9597	not_sig
TC	7	158511941	T	C	rs12538001	7.8848	1.3e-08	0.6736	-0.008	0.0013	-0.005	0.0016	0.002119	-0.0115	0.0019	5.512e-10	2.63672	0.00837116	not_sig	0.03129	not_sig
nonHDL	7	158583806	T	C	rs11977408	7.47654	3.34e-08	0.8025	-0.015	0.0027	-0.0128	0.0036	0.0003984	-0.018	0.0035	2.18e-07	1.04011	0.298291	not_sig	0.07826	not_sig
logTG	8	4780903	A	G	rs13271435	8.00444	9.9e-09	0.6617	0.0094	0.0014	0.0077	0.0018	1.531e-05	0.0105	0.002	2.563e-07	-1.04675	0.295214	not_sig	0.2838	not_sig
LDL	8	6600349	T	C	rs2928576	12.0129	9.71e-13	0.6827	0.0114	0.0014	0.0082	0.0018	5.053e-06	0.0153	0.002	3.745e-14	-2.65752	0.00787176	not_sig	0.3832	not_sig
TC	8	6600349	T	C	rs2928576	13.3152	4.84e-14	0.6845	0.0116	0.0013	0.007	0.0017	2.848e-05	0.0174	0.0019	9.642e-21	-4.11054	3.94741e-05	sig	0.01674	not_sig
HDL	8	6620392	A	G	rs11783088	9.30357	4.97e-10	0.2484	-0.011	0.0015	-0.01	0.002	3.036e-07	-0.0138	0.0022	2.618e-10	1.28868	0.197508	not_sig	0.02341	not_sig
logTG	8	8316637	T	C	rs2921064	23.3276	4.7e-24	0.5012	0.0144	0.0013	0.0149	0.0017	1.438e-18	0.014	0.002	7.99e-13	0.34488	0.730184	not_sig	0.9291	not_sig
LDL	8	8569030	T	C	rs2001354	12.0334	9.26e-13	0.7339	-0.011	0.0014	-0.0101	0.0019	6.554e-08	-0.0121	0.0021	1.544e-08	0.711266	0.476919	not_sig	0.368	not_sig
HDL	8	9183596	A	G	rs4841132	389.691	0	0.8994	0.0954	0.0021	0.0971	0.0028	3.67e-271	0.096	0.0032	4.66e-196	0.260835	0.794219	not_sig	0.5908	not_sig
LDL	8	9183596	A	G	rs4841132	156.931	1.17e-157	0.8998	0.0601	0.0021	0.0598	0.0028	3.39e-104	0.0595	0.0032	1.327e-75	0.0710558	0.943353	not_sig	0.04294	not_sig
TC	8	9183596	A	G	rs4841132	276.024	9.46e-277	0.9	0.0779	0.0021	0.0744	0.0027	1.25e-167	0.0822	0.0031	1.46e-154	-1.91189	0.0558909	not_sig	0.4954	not_sig
nonHDL	8	9183664	A	G	rs4841133	87.5137	3.06e-88	0.899	0.0539	0.0026	0.0593	0.0038	8.516e-55	0.0485	0.0035	3.309e-44	2.09944	0.0357778	not_sig	0.0196	not_sig
logTG	8	9195638	T	C	rs17149279	25.5746	2.66e-26	0.7711	0.0176	0.0015	0.017	0.002	7.121e-18	0.0186	0.0022	4.321e-17	-0.541317	0.588289	not_sig	0.4793	not_sig
LDL	8	9723964	A	T	rs4645567	12.4394	3.64e-13	0.2545	0.0111	0.0015	0.0148	0.002	5.709e-14	0.008	0.0023	0.0004422	2.24686	0.0246491	not_sig	0.006432	not_sig
TC	8	9723964	A	T	rs4645567	13.3689	4.28e-14	0.2549	0.0109	0.0014	0.013	0.0019	2.998e-12	0.0088	0.0021	3.047e-05	1.49447	0.135052	not_sig	0.01622	not_sig
HDL	8	9788582	A	G	rs614197	14.7721	1.69e-15	0.2624	0.0134	0.0015	0.0133	0.0019	1.112e-12	0.0137	0.0021	1.647e-10	-0.142416	0.886751	not_sig	0.9884	not_sig
HDL	8	10643164	T	C	rs9657541	23.0982	7.98e-24	0.8054	0.0181	0.0016	0.0175	0.0021	4.815e-17	0.0192	0.0024	9.504e-16	-0.537479	0.590937	not_sig	0.6893	not_sig
logTG	8	10643164	T	C	rs9657541	59.4839	3.28e-60	0.8055	-0.028	0.0016	-0.0306	0.0021	1.132e-49	-0.0245	0.0024	2.622e-25	-1.92405	0.0543487	not_sig	0.2337	not_sig
LDL	8	10643233	T	G	rs2409663	10.0205	9.54e-11	0.4278	0.0097	0.0013	0.011	0.0017	6.647e-11	0.0082	0.0019	2.35e-05	1.10608	0.268691	not_sig	0.9856	not_sig
logTG	8	11528339	C	G	rs4320509	44.313	4.86e-45	0.8673	-0.03	0.002	-0.0317	0.0025	1.667e-35	-0.0285	0.0029	1.293e-22	-0.840667	0.400535	not_sig	0.1168	not_sig
TC	8	11702594	C	G	rs709821	12.3314	4.66e-13	0.7552	-0.012	0.0015	-0.0141	0.0019	1.754e-13	-0.0096	0.0022	8.317e-06	-1.55988	0.118789	not_sig	0.1616	not_sig
HDL	8	11854888	T	G	rs7459547	8.30341	4.97e-09	0.5057	-0.002	0.0013	-0.0044	0.0017	0.01033	0.0009	0.002	0.643	-2.03575	0.0417757	not_sig	0.5527	not_sig
HDL	8	12617942	A	T	rs12680202	8.15536	6.99e-09	0.6913	0.0102	0.0015	0.0116	0.0019	1.342e-09	0.0093	0.0022	1.929e-05	0.797748	0.425016	not_sig	0.2732	not_sig
logTG	8	13506575	A	G	rs9632849	8.63868	2.3e-09	0.6137	-0.01	0.0013	-0.0113	0.0017	2.034e-11	-0.0068	0.0019	0.0004088	-1.77545	0.0758231	not_sig	0.05966	not_sig
logTG	8	17616562	T	C	rs1968041	8.49356	3.21e-09	0.6212	0.0089	0.0013	0.0083	0.0017	1.209e-06	0.0096	0.0019	7.013e-07	-0.512909	0.608015	not_sig	0.8041	not_sig
HDL	8	17800472	T	C	rs208771	11.0815	8.29e-12	0.4417	0.0102	0.0013	0.0092	0.0016	2.139e-08	0.0107	0.0019	1.228e-08	-0.608837	0.542633	not_sig	0.8949	not_sig
logTG	8	18272535	T	C	rs35246381	108.575	2.66e-109	0.2691	0.0335	0.0014	0.0368	0.0019	3.408e-87	0.0306	0.0021	2.378e-46	2.20222	0.0276497	not_sig	0.02587	not_sig
TC	8	18272635	T	C	rs35570672	93.8892	1.29e-94	0.7119	-0.03	0.0014	-0.0273	0.0018	5.77e-55	-0.0342	0.002	2.029e-66	2.58407	0.00976429	not_sig	0.01331	not_sig
nonHDL	8	18272881	A	G	rs1495741	63.6407	2.29e-64	0.2671	0.0305	0.0017	0.0278	0.0026	3.977e-27	0.0338	0.0024	1.149e-46	-1.70296	0.0885757	not_sig	0.4092	not_sig
LDL	8	18273300	C	G	rs1495743	36.1297	7.42e-37	0.2688	0.0185	0.0015	0.0153	0.0019	6.164e-16	0.0245	0.0022	1.85e-29	-3.18736	0.00143578	not_sig	0.01498	not_sig
HDL	8	19251679	T	C	rs2958557	16.4918	3.22e-17	0.9922	0.0779	0.0084	0.0799	0.0112	8.956e-13	0.076	0.012	2.577e-10	0.239569	0.810665	not_sig	0.7096	not_sig
logTG	8	19251679	T	C	rs2958557	17.0073	9.83e-18	0.9923	-0.078	0.0083	-0.0854	0.011	1.072e-14	-0.0751	0.0118	2.057e-10	-0.642263	0.520702	not_sig	0.5935	not_sig
logTG	8	19820916	T	C	rs117199990	1503.41	0	0.9026	0.1782	0.0021	0.1879	0.0027	0	0.1764	0.0031	0	2.81384	0.00489538	not_sig	0.002323	not_sig
HDL	8	19823648	A	T	rs3208305	1197.18	0	0.3012	0.1053	0.0014	0.114	0.0017	0	0.1014	0.002	0	4.8397	1.30034e-06	sig	5.537e-14	sig
nonHDL	8	19830921	T	C	rs10096633	120.157	6.97e-121	0.8593	0.0542	0.0022	0.0502	0.0033	1.033e-51	0.0588	0.003	3.911e-85	-1.93657	0.0527976	not_sig	0.1389	not_sig
HDL	8	20485546	A	G	rs147158682	9.02574	9.42e-10	0.9955	0.0878	0.0191	0.0526	0.0232	0.02362	0.1779	0.0342	1.955e-07	-3.05542	0.00224749	not_sig	0.2079	not_sig
logTG	8	20610866	T	C	rs2616213	10.7642	1.72e-11	0.5202	-0.009	0.0013	-0.0104	0.0016	2.232e-10	-0.0085	0.0019	5.679e-06	-0.769383	0.441666	not_sig	0.6281	not_sig
LDL	8	21918089	A	C	rs900776	26.4205	3.8e-27	0.2078	-0.02	0.0017	-0.0212	0.0022	9.605e-23	-0.0195	0.0025	6.575e-15	-0.514118	0.60717	not_sig	0.831	not_sig
nonHDL	8	21918089	A	C	rs900776	22.0159	9.64e-23	0.1828	-0.022	0.002	-0.0216	0.0029	1.062e-13	-0.0224	0.0027	7.098e-17	0.202767	0.839317	not_sig	0.9113	not_sig
TC	8	21918089	A	C	rs900776	24.1094	7.77e-25	0.2047	-0.018	0.0016	-0.0202	0.0021	2.676e-22	-0.0177	0.0024	7.021e-14	-0.789937	0.429565	not_sig	0.5596	not_sig
LDL	8	23358480	T	TG	rs397950126	8.59561	2.54e-09	0.5451	-0.007	0.0013	-0.0078	0.0017	4.06e-06	-0.0068	0.002	0.0008976	-0.383667	0.701225	not_sig	0.8717	not_sig
TC	8	23358480	T	TG	rs397950126	9.45637	3.5e-10	0.5485	-0.007	0.0013	-0.0076	0.0016	1.594e-06	-0.0057	0.0019	0.002099	-0.770734	0.440865	not_sig	0.8126	not_sig
logTG	8	23525075	A	T	rs56193509	7.78185	1.65e-08	0.7456	-0.009	0.0014	-0.0085	0.0019	4.178e-06	-0.0096	0.0021	5.631e-06	0.390717	0.696007	not_sig	0.5703	not_sig
HDL	8	25464670	T	G	rs73221948	11.2321	5.86e-12	0.7334	0.013	0.0017	0.0163	0.0021	2.46e-14	0.0098	0.0024	4.901e-05	2.05507	0.0398726	not_sig	0.1131	not_sig
logTG	8	25464690	T	G	rs11992444	10.2719	5.35e-11	0.4901	0.0111	0.0015	0.0147	0.0018	1.184e-15	0.0068	0.0021	0.001278	2.873	0.00406598	not_sig	0.002364	not_sig
logTG	8	26203081	A	G	rs7007256	8.23164	5.87e-09	0.2773	-0.01	0.0014	-0.0089	0.0018	8.347e-07	-0.0103	0.0021	6.273e-07	0.509139	0.610655	not_sig	0.3957	not_sig
LDL	8	29024943	A	G	rs117139027	32.2179	6.06e-33	0.9871	0.0803	0.0062	0.0828	0.0077	1.076e-26	0.0676	0.0099	7.394e-12	1.22036	0.222328	not_sig	0.1759	not_sig
nonHDL	8	29024943	A	G	rs117139027	17.1888	6.47e-18	0.988	0.0765	0.0081	0.0879	0.0118	9.412e-14	0.0641	0.0107	2.085e-09	1.50053	0.133478	not_sig	0.3505	not_sig
TC	8	29024943	A	G	rs117139027	24.3551	4.41e-25	0.9874	0.0692	0.0061	0.0715	0.0076	6.319e-21	0.0601	0.0095	3.094e-10	0.944104	0.345117	not_sig	0.1301	not_sig
HDL	8	34519519	A	G	rs4609187	8.45663	3.49e-09	0.6739	-0.009	0.0014	-0.0092	0.0018	1.981e-07	-0.0103	0.002	3.647e-07	0.412201	0.680192	not_sig	0.4771	not_sig
HDL	8	36848357	T	C	rs16885613	8.84128	1.44e-09	0.2145	-0.011	0.0015	-0.0075	0.002	0.0001171	-0.0172	0.0023	2.957e-14	3.20874	0.0013332	not_sig	0.004088	not_sig
logTG	8	36853213	T	C	rs10096213	13.5002	3.16e-14	0.7857	-0.014	0.0016	-0.0122	0.002	1.816e-09	-0.0157	0.0023	2.495e-11	1.15506	0.248066	not_sig	0.2887	not_sig
logTG	8	37385495	A	C	rs4739514	7.62969	2.35e-08	0.1953	-0.017	0.0024	-0.0185	0.0032	1.159e-08	-0.0178	0.0036	6.3e-07	-0.146186	0.883775	not_sig	0.9461	not_sig
logTG	8	38328302	A	G	rs10958704	15.092	8.09e-16	0.3903	0.0118	0.0013	0.0105	0.0017	2.028e-10	0.014	0.0019	1.164e-13	-1.38091	0.167307	not_sig	0.3121	not_sig
HDL	8	38328902	A	G	rs4082204	9.59213	2.56e-10	0.6147	0.0097	0.0013	0.0087	0.0016	1.17e-07	0.0117	0.0019	4.495e-10	-1.21767	0.223348	not_sig	0.3135	not_sig
TC	8	41542093	A	G	rs34265667	8.84394	1.43e-09	0.97	0.0254	0.0037	0.0307	0.0049	2.421e-10	0.0199	0.0054	0.000253	1.49251	0.135566	not_sig	0.00759	not_sig
TC	8	55422440	T	C	rs10104003	47.287	5.16e-48	0.7951	-0.023	0.0015	-0.0218	0.0019	4.74e-31	-0.0261	0.0021	3.526e-35	1.53005	0.126003	not_sig	0.9676	not_sig
LDL	8	55437524	A	G	rs9298506	44.6219	2.39e-45	0.2051	0.0234	0.0015	0.0227	0.002	1.799e-29	0.0262	0.0023	1.398e-30	-1.15647	0.247488	not_sig	0.796	not_sig
nonHDL	8	55441799	A	G	rs28503706	44.5563	2.78e-45	0.2116	0.027	0.0018	0.0252	0.0026	1.185e-22	0.0296	0.0024	4.697e-35	-1.24884	0.211725	not_sig	0.3525	not_sig
logTG	8	59388565	T	C	rs2081687	55.129	7.43e-56	0.6744	-0.022	0.0013	-0.0206	0.0017	1.151e-33	-0.0233	0.002	6.86e-33	1.03464	0.300837	not_sig	0.814	not_sig
LDL	8	59392324	A	G	rs9297994	131.189	6.47e-132	0.3228	0.0349	0.0014	0.032	0.0018	4.725e-72	0.0392	0.002	1.448e-83	-2.69495	0.0070399	not_sig	0.2041	not_sig
nonHDL	8	59392324	A	G	rs9297994	124.039	9.14e-125	0.3226	0.0393	0.0016	0.0369	0.0023	9.704e-59	0.041	0.0021	1.523e-81	-1.32206	0.186148	not_sig	0.3513	not_sig
TC	8	59392324	A	G	rs9297994	172.205	6.23e-173	0.3185	0.0386	0.0013	0.0356	0.0017	7.84e-99	0.0427	0.0019	7.94e-113	-2.80623	0.00501247	not_sig	0.06198	not_sig
HDL	8	60654261	A	G	rs1949102	9.4423	3.61e-10	0.2527	0.0106	0.0015	0.0107	0.0019	2.901e-08	0.0101	0.0022	5.276e-06	0.208108	0.835144	not_sig	0.6835	not_sig
LDL	8	61409871	T	G	rs6471886	12.0283	9.37e-13	0.6147	-0.011	0.0013	-0.0134	0.0017	1.355e-15	-0.0085	0.0019	9.921e-06	-1.93564	0.0529115	not_sig	0.01058	not_sig
logTG	8	61531713	A	T	rs660865	8.89013	1.29e-09	0.4075	0.0094	0.0013	0.0101	0.0017	1.959e-09	0.0068	0.0019	0.0004047	1.302	0.192917	not_sig	0.2251	not_sig
nonHDL	8	61539278	A	T	rs615031	14.4827	3.29e-15	0.4051	0.0137	0.0015	0.0174	0.0022	6.779e-16	0.0108	0.002	6.486e-08	2.22931	0.0257933	not_sig	0.02023	not_sig
TC	8	61539278	A	T	rs615031	23.7545	1.76e-24	0.4117	0.0141	0.0012	0.0162	0.0016	7.652e-25	0.0116	0.0018	3.851e-11	1.9247	0.0542668	not_sig	0.01196	not_sig
logTG	8	64622944	A	AT	rs112067118	7.63032	2.34e-08	0.8246	-0.009	0.0018	-0.0076	0.0023	0.0009925	-0.0123	0.0028	8.388e-06	1.30462	0.192021	not_sig	0.8341	not_sig
HDL	8	64799004	T	G	rs6994609	11.532	2.94e-12	0.5172	0.0103	0.0013	0.0105	0.0016	1.437e-10	0.0106	0.0019	1.19e-08	-0.0405891	0.967623	not_sig	0.6729	not_sig
HDL	8	71196058	A	C	rs35395175	30.0533	8.85e-31	0.8271	0.0248	0.0019	0.027	0.0024	1.989e-28	0.0223	0.0027	2.65e-16	1.31182	0.189582	not_sig	0.1347	not_sig
HDL	8	72459582	A	G	rs28471687	14.3554	4.41e-15	0.0806	-0.021	0.0023	-0.0181	0.003	1.848e-09	-0.0243	0.0034	6.375e-13	1.37866	0.168	not_sig	0.2552	not_sig
logTG	8	72466324	A	G	rs745578	23.1998	6.31e-24	0.6773	-0.016	0.0014	-0.0115	0.0018	4.044e-10	-0.0218	0.0021	1.771e-25	3.74581	0.000179815	not_sig	0.001694	not_sig
nonHDL	8	72466324	A	G	rs745578	9.35839	4.38e-10	0.6738	-0.011	0.0017	-0.0089	0.0024	0.000227	-0.0139	0.0022	4.733e-10	1.54231	0.122999	not_sig	0.1425	not_sig
LDL	8	74888494	T	C	rs2306486	20.939	1.15e-21	0.6973	0.0145	0.0014	0.0126	0.0018	2.142e-12	0.0174	0.002	1.28e-17	-1.79663	0.0723937	not_sig	0.3412	not_sig
nonHDL	8	74899700	T	G	rs4385461	17.4367	3.66e-18	0.6948	0.0157	0.0016	0.0118	0.0023	3.521e-07	0.0185	0.0022	9.695e-18	-2.11412	0.0345051	not_sig	0.05779	not_sig
TC	8	74899700	T	G	rs4385461	18.4304	3.71e-19	0.7018	0.0132	0.0013	0.0115	0.0017	1.136e-11	0.0155	0.0019	3.248e-16	-1.58098	0.113884	not_sig	0.274	not_sig
LDL	8	81357702	T	C	rs400824	7.40517	3.93e-08	0.6895	-0.01	0.0014	-0.0095	0.0019	3.62e-07	-0.0104	0.0021	1.025e-06	0.32007	0.748915	not_sig	0.4186	not_sig
TC	8	81357702	T	C	rs400824	7.63872	2.3e-08	0.6947	-0.01	0.0014	-0.0091	0.0018	2.443e-07	-0.0097	0.002	8.355e-07	0.224701	0.822212	not_sig	0.557	not_sig
logTG	8	82404216	T	C	rs6473280	9.41561	3.84e-10	0.3386	-0.01	0.0014	-0.0111	0.0019	2.175e-09	-0.0106	0.002	2.134e-07	-0.182324	0.855329	not_sig	0.6448	not_sig
HDL	8	103876183	A	G	rs1802539	11.8871	1.3e-12	0.813	-0.013	0.0016	-0.0134	0.0021	8.349e-11	-0.0127	0.0023	5.705e-08	-0.226622	0.820718	not_sig	0.935	not_sig
HDL	8	106385695	A	C	rs979646	10.9111	1.23e-11	0.477	0.0097	0.0012	0.0102	0.0016	1.731e-10	0.0103	0.0018	1.842e-08	-0.0418665	0.966605	not_sig	0.6763	not_sig
logTG	8	106433378	T	C	rs67057051	9.42057	3.8e-10	0.2577	0.0109	0.0015	0.0086	0.0019	5.768e-06	0.0143	0.0022	7.169e-11	-1.97237	0.0485675	not_sig	0.19	not_sig
HDL	8	116597635	T	C	rs3808460	123.986	1.03e-124	0.6019	0.0325	0.0013	0.0273	0.0017	1.532e-60	0.0399	0.0019	7.02e-99	-4.98307	6.25843e-07	sig	6.489e-05	sig
logTG	8	116638975	T	C	rs13265978	12.1907	6.45e-13	0.0721	0.0204	0.0026	0.0197	0.0033	2.458e-09	0.0234	0.0038	7.467e-10	-0.739482	0.459614	not_sig	0.8354	not_sig
LDL	8	116657911	T	G	rs2721961	59.414	3.85e-60	0.3037	-0.023	0.0014	-0.0227	0.0018	3.602e-36	-0.0237	0.0021	1.304e-30	0.364114	0.715773	not_sig	0.3544	not_sig
TC	8	116658583	T	G	rs2737245	83.9947	1.01e-84	0.7292	0.0276	0.0013	0.0282	0.0017	1.391e-59	0.0287	0.0019	8.064e-50	-0.197622	0.843341	not_sig	0.4085	not_sig
nonHDL	8	116659578	C	G	rs2737246	62.7302	1.86e-63	0.7239	0.0286	0.0016	0.0314	0.0024	1.065e-40	0.0271	0.0022	2.823e-35	1.32639	0.184712	not_sig	0.2208	not_sig
HDL	8	121872464	A	C	rs10955992	40.4916	3.22e-41	0.6539	-0.02	0.0013	-0.0172	0.0017	4.139e-24	-0.0236	0.0019	3.882e-34	2.53108	0.0113711	not_sig	0.04427	not_sig
TC	8	121872464	A	C	rs10955992	10.9129	1.22e-11	0.6535	-0.01	0.0013	-0.01	0.0016	9.294e-10	-0.0096	0.0018	1.602e-07	-0.167365	0.867083	not_sig	0.6963	not_sig
logTG	8	125756010	A	C	rs35360670	7.36094	4.36e-08	0.955	-0.021	0.0032	-0.0247	0.0042	3.69e-09	-0.0189	0.0046	4.504e-05	-0.936636	0.348946	not_sig	0.9989	not_sig
LDL	8	126500031	C	G	rs28601761	449.799	0	0.3993	-0.058	0.0013	-0.0594	0.0017	3.5e-270	-0.0615	0.0019	7.93e-222	0.829561	0.406787	not_sig	0.1672	not_sig
logTG	8	126500031	C	G	rs28601761	893.697	0	0.399	-0.083	0.0013	-0.0909	0.0017	0	-0.0772	0.0019	0	-5.40527	6.47117e-08	sig	2.447e-07	sig
nonHDL	8	126500031	C	G	rs28601761	598.247	0	0.3957	-0.081	0.0015	-0.0895	0.0022	0	-0.0744	0.002	1.11e-288	-5.10039	3.38952e-07	sig	5.029e-07	sig
TC	8	126500031	C	G	rs28601761	626.171	0	0.3936	-0.067	0.0012	-0.0719	0.0016	0	-0.0608	0.0018	4.28e-250	-4.64439	3.41089e-06	sig	1.195e-06	sig
HDL	8	126507308	T	C	rs2980888	169.254	5.57e-170	0.7084	0.04	0.0014	0.043	0.0018	1.57e-130	0.0378	0.002	1.638e-78	1.94858	0.0513451	not_sig	0.02302	not_sig
logTG	8	129567373	T	C	rs1561929	9.32379	4.74e-10	0.1179	-0.014	0.002	-0.0116	0.0026	7.339e-06	-0.0202	0.003	9.023e-12	2.17903	0.0293294	not_sig	0.1474	not_sig
HDL	8	144296480	C	G	rs58301047	51.7755	1.68e-52	0.7912	-0.026	0.0016	-0.0225	0.002	1.315e-29	-0.0308	0.0023	2.169e-40	2.74562	0.00603969	not_sig	0.0992	not_sig
logTG	8	144306970	A	G	rs72691637	11.6958	2.01e-12	0.7853	0.0134	0.0016	0.0105	0.0021	3.51e-07	0.0189	0.0024	2.075e-15	-2.64951	0.00806092	not_sig	0.2265	not_sig
TC	8	145040856	T	G	rs11781667	44.1211	7.57e-45	0.6679	-0.02	0.0013	-0.0188	0.0017	2.975e-29	-0.021	0.0019	2.381e-28	0.869537	0.384554	not_sig	0.6828	not_sig
LDL	8	145051484	T	C	rs1134030	55.2425	5.72e-56	0.6546	-0.023	0.0014	-0.0229	0.0018	8.813e-39	-0.0234	0.002	1.736e-30	0.187149	0.851544	not_sig	0.3867	not_sig
nonHDL	8	145051484	T	C	rs1134030	39.1829	6.56e-40	0.6591	-0.023	0.0016	-0.0229	0.0023	9.389e-23	-0.023	0.0022	2.435e-26	0.031554	0.974828	not_sig	0.9722	not_sig
logTG	9	1033773	C	G	rs1567353	12.5593	2.76e-13	0.3546	0.0113	0.0013	0.0109	0.0017	3.617e-10	0.0114	0.002	9.568e-09	-0.1916	0.848055	not_sig	0.5818	not_sig
HDL	9	1038666	T	C	rs10959032	14.4773	3.33e-15	0.7174	0.0119	0.0014	0.0134	0.0018	4.604e-13	0.01	0.0021	1.575e-06	1.2394	0.215198	not_sig	0.3429	not_sig
logTG	9	2622278	A	G	rs2219143	8.1368	7.3e-09	0.6139	0.008	0.0014	0.0068	0.0018	0.0001581	0.0078	0.002	9.095e-05	-0.37384	0.708523	not_sig	0.4749	not_sig
LDL	9	2640759	A	G	rs3780181	43.7413	1.81e-44	0.094	-0.035	0.0023	-0.0358	0.003	4.212e-32	-0.036	0.0035	7.275e-25	0.0436937	0.965149	not_sig	0.8166	not_sig
nonHDL	9	2640759	A	G	rs3780181	22.478	3.33e-23	0.0839	-0.031	0.0028	-0.0314	0.0042	5.995e-14	-0.0321	0.0038	2.084e-17	0.124117	0.901222	not_sig	0.7486	not_sig
TC	9	2640759	A	G	rs3780181	38.5108	3.08e-39	0.0939	-0.033	0.0023	-0.0339	0.003	1.86e-30	-0.0326	0.0033	1.848e-22	-0.293733	0.768962	not_sig	0.895	not_sig
HDL	9	5073770	T	G	rs77375493	21.8239	1.5e-22	0.9997	0.3579	0.0457	0.3976	0.053	6.339e-14	0.2146	0.0974	0.02759	1.66187	0.0965392	not_sig	0.03226	not_sig
TC	9	5073770	T	G	rs77375493	12.2206	6.02e-13	0.9997	0.3096	0.0451	0.3802	0.0524	4.023e-13	0.0278	0.0953	0.7702	3.26138	0.00110869	not_sig	0.5136	not_sig
logTG	9	6666512	A	T	rs2773513	10.1685	6.78e-11	0.1589	0.0135	0.0017	0.0146	0.0022	4.359e-11	0.0109	0.0026	2.47e-05	1.09271	0.27452	not_sig	0.6494	not_sig
TC	9	6667928	A	C	rs820503	9.29801	5.03e-10	0.8588	-0.012	0.0017	-0.0115	0.0022	1.412e-07	-0.0134	0.0025	6.097e-08	0.574914	0.565349	not_sig	0.5556	not_sig
HDL	9	13452771	A	G	rs10961056	7.32873	4.69e-08	0.5969	0.0085	0.0013	0.0083	0.0017	8.937e-07	0.009	0.0019	3.116e-06	-0.276837	0.781905	not_sig	0.6075	not_sig
logTG	9	13697152	A	C	rs1590404	10.9823	1.04e-11	0.5469	-0.011	0.0013	-0.0097	0.0017	8.154e-09	-0.0122	0.0019	9.803e-11	0.986363	0.323955	not_sig	0.4518	not_sig
HDL	9	14068327	A	C	rs543458	9.10373	7.88e-10	0.1838	0.0125	0.0017	0.013	0.0022	3.708e-09	0.0126	0.0025	4.737e-07	0.121107	0.903606	not_sig	0.8863	not_sig
HDL	9	15304782	A	C	rs686030	132.855	1.4e-133	0.1344	-0.049	0.0019	-0.0435	0.0024	1.786e-71	-0.0561	0.0028	1.25e-91	3.4448	0.00057149	not_sig	0.006241	not_sig
logTG	9	15304782	A	C	rs686030	12.9428	1.14e-13	0.1344	-0.016	0.0019	-0.0141	0.0024	4.215e-09	-0.0192	0.0027	1.831e-12	1.42009	0.155581	not_sig	0.5335	not_sig
TC	9	15304782	A	C	rs686030	35.9758	1.06e-36	0.1346	-0.025	0.0018	-0.0246	0.0024	2.747e-25	-0.0266	0.0027	1.332e-23	0.557884	0.576923	not_sig	0.4959	not_sig
nonHDL	9	16884586	A	T	rs10810657	21.7813	1.65e-22	0.4511	0.0166	0.0015	0.0195	0.0022	2.028e-18	0.0152	0.0021	2.051e-13	1.4199	0.155638	not_sig	0.2225	not_sig
LDL	9	16900695	A	G	rs28498684	20.9343	1.16e-21	0.5465	-0.014	0.0013	-0.0148	0.0017	5.525e-18	-0.0136	0.002	3.875e-12	-0.4604	0.645229	not_sig	0.1536	not_sig
TC	9	16900695	A	G	rs28498684	20.7742	1.68e-21	0.5377	-0.013	0.0012	-0.0152	0.0016	3.04e-21	-0.0106	0.0018	4.022e-09	-1.9247	0.0542668	not_sig	0.03661	not_sig
HDL	9	16901067	A	C	rs62543565	8.74949	1.78e-09	0.4127	-0.009	0.0013	-0.0084	0.0016	3.444e-07	-0.0096	0.0019	3.645e-07	0.487069	0.626209	not_sig	0.9201	not_sig
logTG	9	16901067	A	C	rs62543565	23.7376	1.83e-24	0.4079	0.0144	0.0013	0.0144	0.0017	5.922e-18	0.014	0.0019	2.657e-13	0.157818	0.8746	not_sig	0.8292	not_sig
HDL	9	19254604	A	G	rs34025997	7.8197	1.51e-08	0.9192	-0.017	0.0024	-0.0162	0.0032	4.652e-07	-0.0195	0.0035	2.475e-08	0.701633	0.482908	not_sig	0.4966	not_sig
nonHDL	9	19313913	A	G	rs34150222	22.8081	1.56e-23	0.0859	0.0303	0.0028	0.0273	0.0041	2.237e-11	0.0338	0.0038	4.957e-19	-1.16773	0.242914	not_sig	0.632	not_sig
LDL	9	19323815	A	G	rs72700413	37.2283	5.91e-38	0.9162	-0.033	0.0024	-0.0278	0.0031	9.356e-20	-0.0381	0.0035	2.17e-27	2.21868	0.0265087	not_sig	0.02887	not_sig
TC	9	19352260	A	T	rs10114039	41.0723	8.47e-42	0.1579	0.0296	0.002	0.0243	0.0026	1.194e-20	0.0368	0.0031	7.37e-33	-3.11298	0.00185206	not_sig	0.01457	not_sig
TC	9	22090301	A	C	rs10757273	16.0647	8.62e-17	0.5298	0.0118	0.0013	0.0149	0.0016	1.213e-19	0.0062	0.0019	0.001373	3.52915	0.000416897	not_sig	0.01912	not_sig
LDL	9	22103341	T	G	rs1537373	16.3077	4.92e-17	0.5176	-0.012	0.0013	-0.0148	0.0017	9.471e-19	-0.0075	0.0019	8.665e-05	-2.88371	0.00393018	not_sig	0.2117	not_sig
nonHDL	9	22124504	A	T	rs1333047	10.331	4.67e-11	0.5084	-0.011	0.0015	-0.0142	0.0022	5.278e-11	-0.0078	0.002	0.0001328	-2.16176	0.030637	not_sig	0.2292	not_sig
HDL	9	28410683	T	C	rs1412234	13.5077	3.11e-14	0.2988	-0.012	0.0014	-0.0112	0.0018	1.764e-10	-0.013	0.002	5.398e-11	0.67451	0.499987	not_sig	0.2452	not_sig
logTG	9	28414625	T	C	rs17770336	8.18847	6.48e-09	0.7011	-0.01	0.0014	-0.0093	0.0018	1.552e-07	-0.0104	0.002	2.388e-07	0.411224	0.680908	not_sig	0.7374	not_sig
logTG	9	32450187	T	C	rs12985	7.83582	1.46e-08	0.3857	-0.008	0.0013	-0.0076	0.0017	6.582e-06	-0.0089	0.0019	2.508e-06	0.512909	0.608015	not_sig	0.8206	not_sig
HDL	9	32523737	T	C	rs11795343	9.27234	5.34e-10	0.3951	0.0099	0.0013	0.0098	0.0017	6.789e-09	0.0103	0.0019	5.131e-08	-0.197741	0.843248	not_sig	0.9971	not_sig
HDL	9	33128429	A	G	rs10758191	9.11695	7.64e-10	0.495	-0.009	0.0012	-0.0099	0.0016	4.506e-10	-0.0091	0.0018	5.233e-07	-0.334932	0.737677	not_sig	0.395	not_sig
logTG	9	34151463	T	C	rs10971957	13.7628	1.73e-14	0.4272	0.0102	0.0013	0.0091	0.0017	6.113e-08	0.0111	0.0019	3.25e-09	-0.78909	0.430059	not_sig	0.125	not_sig
HDL	9	34175780	T	C	rs10971974	7.76335	1.72e-08	0.5802	-0.009	0.0013	-0.0104	0.0017	1.124e-09	-0.0082	0.0019	2.377e-05	-0.870059	0.384268	not_sig	0.3193	not_sig
LDL	9	78212428	A	G	rs7864568	20.4343	3.68e-21	0.6714	0.0149	0.0014	0.0154	0.0018	1.599e-17	0.0151	0.0021	4.908e-13	0.109234	0.913017	not_sig	0.1933	not_sig
TC	9	78212428	A	G	rs7864568	14.6514	2.23e-15	0.6719	0.0125	0.0013	0.0118	0.0018	2.105e-11	0.0138	0.002	5.225e-12	-0.749005	0.453854	not_sig	0.6936	not_sig
nonHDL	9	78214833	A	G	rs2209915	14.9857	1.03e-15	0.6819	0.0151	0.0017	0.0145	0.0023	5.177e-10	0.0152	0.0022	4.222e-12	-0.220878	0.825187	not_sig	0.7627	not_sig
LDL	9	78729213	T	C	rs1571791	17.1514	7.06e-18	0.6138	-0.012	0.0013	-0.0116	0.0017	7.064e-12	-0.0144	0.0019	4.056e-14	1.10608	0.268691	not_sig	0.511	not_sig
nonHDL	9	78729213	T	C	rs1571791	15.7576	1.75e-16	0.6151	-0.013	0.0015	-0.0128	0.0022	1.043e-08	-0.0141	0.0021	7.213e-12	0.429271	0.667726	not_sig	0.8594	not_sig
TC	9	78729213	T	C	rs1571791	15.5199	3.02e-16	0.6146	-0.011	0.0012	-0.0113	0.0016	6.29e-12	-0.0125	0.0018	7.347e-12	0.502096	0.6156	not_sig	0.8851	not_sig
logTG	9	86626769	A	T	rs10868080	10.0949	8.04e-11	0.279	-0.01	0.0014	-0.0091	0.0018	4.175e-07	-0.0134	0.0021	1.07e-10	1.56378	0.117868	not_sig	0.1842	not_sig
HDL	9	88940359	T	C	rs41310053	8.15173	7.05e-09	0.9943	-0.063	0.0091	-0.065	0.0118	3.877e-08	-0.0637	0.0136	2.977e-06	-0.0727957	0.941969	not_sig	0.7135	not_sig
LDL	9	91434086	A	G	rs62551047	10.0438	9.04e-11	0.9385	0.0197	0.0028	0.021	0.0036	7.526e-09	0.0202	0.0041	7.23e-07	0.147666	0.882607	not_sig	0.6659	not_sig
TC	9	91454519	T	C	rs9410381	8.51418	3.06e-09	0.9383	0.0183	0.0027	0.0199	0.0035	1.38e-08	0.0175	0.0039	5.974e-06	0.461513	0.644431	not_sig	0.9246	not_sig
logTG	9	92215734	T	C	rs1571535	14.5964	2.53e-15	0.4988	0.0102	0.0012	0.0099	0.0016	9.916e-10	0.0111	0.0018	1.771e-09	-0.501209	0.616224	not_sig	0.844	not_sig
HDL	9	93944244	T	C	rs773519	8.84595	1.43e-09	0.2351	-0.008	0.0016	-0.0059	0.0021	0.004398	-0.0095	0.0024	5.178e-05	1.13819	0.255041	not_sig	0.4838	not_sig
logTG	9	95445032	C	G	rs10992409	8.41765	3.82e-09	0.7739	-0.01	0.0016	-0.0083	0.0021	5.902e-05	-0.0133	0.0024	2.336e-08	1.57709	0.114775	not_sig	0.2366	not_sig
logTG	9	96970677	A	G	rs12004367	8.99071	1.02e-09	0.3021	0.0099	0.0014	0.0127	0.0019	9.248e-12	0.0076	0.002	0.0002218	1.8597	0.0629275	not_sig	0.1471	not_sig
TC	9	100640410	A	G	rs4592135	9.82363	1.5e-10	0.3769	-0.01	0.0015	-0.01	0.0018	6.886e-08	-0.0087	0.0022	8.888e-05	-0.460801	0.644941	not_sig	0.6765	not_sig
HDL	9	100784050	A	C	rs10984811	7.44512	3.59e-08	0.2783	0.0084	0.0014	0.0087	0.0019	2.368e-06	0.0087	0.0021	2.715e-05	0	1	not_sig	0.8356	not_sig
logTG	9	102119689	T	TA	rs200675438	8.74524	1.8e-09	0.6032	-0.011	0.0015	-0.0105	0.0019	2.972e-08	-0.0115	0.0023	7.491e-07	0.337154	0.736001	not_sig	0.52	not_sig
HDL	9	102247368	A	G	rs10760688	7.58797	2.58e-08	0.3639	-0.007	0.0013	-0.0088	0.0017	2.239e-07	-0.0046	0.0019	0.0181	-1.66102	0.096709	not_sig	0.1089	not_sig
HDL	9	105805994	T	G	rs746125435	12.4002	3.98e-13	0.0004	-0.411	0.0536	-0.5098	0.0802	2.07e-10	-0.4455	0.0755	3.677e-09	-0.588624	0.556113	not_sig	0.7237	not_sig
TC	9	106526397	A	C	rs149360185	7.99502	1.01e-08	0.9957	0.0572	0.0104	0.0462	0.0137	0.0007607	0.0681	0.015	5.648e-06	-1.08633	0.277334	not_sig	0.956	not_sig
HDL	9	106532723	T	TA	rs549466628	10.6079	2.47e-11	0.9943	-0.076	0.01	-0.0689	0.0127	6.424e-08	-0.0807	0.0154	1.53e-07	0.595983	0.551187	not_sig	0.1908	not_sig
HDL	9	107093784	T	G	rs186793936	61.2965	5.05e-62	0.9984	0.336	0.0196	0.3366	0.0268	3.243e-36	0.3404	0.0274	1.686e-35	-0.0999717	0.920367	not_sig	0.7877	not_sig
TC	9	107093784	T	G	rs186793936	15.5039	3.13e-16	0.9984	0.1753	0.0192	0.1711	0.026	4.762e-11	0.1834	0.0265	4.858e-12	-0.333874	0.738474	not_sig	0.6838	not_sig
HDL	9	107661742	A	C	rs2740488	475.63	0	0.271	-0.067	0.0014	-0.0615	0.0018	1.4e-257	-0.0775	0.002	0	5.99564	2.02681e-09	sig	0.001936	not_sig
nonHDL	9	107661742	A	C	rs2740488	78.2492	5.63e-79	0.2656	-0.032	0.0017	-0.0323	0.0024	3.859e-42	-0.0324	0.0022	9.58e-49	0.0308462	0.975392	not_sig	0.7808	not_sig
TC	9	107661742	A	C	rs2740488	309.368	0	0.271	-0.052	0.0013	-0.0469	0.0017	2.21e-163	-0.0613	0.0019	2.83e-221	5.69151	1.2592e-08	sig	0.0002712	not_sig
LDL	9	107664301	T	C	rs1883025	59.08	8.32e-60	0.737	0.0241	0.0014	0.0227	0.0018	2.133e-35	0.0269	0.0021	7.551e-37	-1.52928	0.126195	not_sig	0.9707	not_sig
logTG	9	107665978	C	G	rs1800978	31.022	9.51e-32	0.1318	-0.025	0.0019	-0.0206	0.0025	2.556e-16	-0.0321	0.0028	1.391e-30	3.08173	0.00205799	not_sig	0.00241	not_sig
TC	9	108179115	T	G	rs16924584	19.9274	1.18e-20	0.2823	0.0509	0.0048	0.0512	0.0058	1.455e-18	0.0529	0.0081	7.348e-11	-0.171888	0.863525	not_sig	0.8987	not_sig
HDL	9	109062494	A	C	rs535372564	15.0687	8.54e-16	0.9992	0.2771	0.0338	0.2646	0.0485	4.865e-08	0.3479	0.0467	9.472e-14	-1.24752	0.212206	not_sig	0.3101	not_sig
HDL	9	110112471	C	G	rs763060665	8.28867	5.14e-09	0.9986	0.1617	0.0294	0.1544	0.0402	0.0001205	0.1756	0.0373	2.564e-06	-0.389799	0.696685	not_sig	0.3061	not_sig
logTG	9	110488875	A	C	rs11789974	11.5444	2.85e-12	0.9645	0.027	0.0035	0.0268	0.0045	3.073e-09	0.0278	0.0053	1.3e-07	-0.144671	0.884971	not_sig	0.9338	not_sig
TC	9	110530324	A	G	rs1967604	7.88236	1.31e-08	0.7291	-0.009	0.0013	-0.0099	0.0017	1.379e-08	-0.0095	0.0019	9.248e-07	-0.158098	0.87438	not_sig	0.6047	not_sig
TC	9	112223059	A	G	rs12000215	8.36619	4.3e-09	0.3408	-0.009	0.0013	-0.0075	0.0016	3.807e-06	-0.0118	0.0018	7.12e-11	1.79918	0.0719908	not_sig	0.4805	not_sig
logTG	9	112245773	C	G	rs75113691	14.8309	1.48e-15	0.9193	0.0285	0.0031	0.0292	0.0042	2.096e-12	0.0283	0.0045	3.162e-10	0.147076	0.883072	not_sig	0.4443	not_sig
nonHDL	9	112247790	G	GA	rs397959160	8.82642	1.49e-09	0.1104	-0.026	0.0035	-0.0272	0.0048	1.463e-08	-0.023	0.0047	8.021e-07	-0.627881	0.530082	not_sig	0.7172	not_sig
HDL	9	112556911	T	C	rs2094453	9.40557	3.93e-10	0.7882	0.0118	0.0016	0.0108	0.0021	2.998e-07	0.0133	0.0023	1.404e-08	-0.809365	0.418305	not_sig	0.4946	not_sig
HDL	9	113830547	T	C	rs2418130	8.80243	1.58e-09	0.6379	-0.009	0.0013	-0.011	0.0017	1.249e-10	-0.0077	0.0019	4.927e-05	-1.30509	0.191863	not_sig	0.2401	not_sig
logTG	9	117083803	A	C	rs150611042	8.52105	3.01e-09	0.9334	0.0194	0.0028	0.0159	0.0037	1.409e-05	0.0225	0.0039	1.135e-08	-1.23498	0.216837	not_sig	0.5323	not_sig
LDL	9	117133524	A	G	rs56294298	9.7613	1.73e-10	0.9175	0.0189	0.0026	0.019	0.0034	1.963e-08	0.0191	0.0036	1.564e-07	-0.0203395	0.983773	not_sig	0.9779	not_sig
nonHDL	9	117133524	A	G	rs56294298	9.97169	1.07e-10	0.914	0.0217	0.0029	0.0203	0.0043	1.907e-06	0.0224	0.0039	8.657e-09	-0.363293	0.716386	not_sig	0.8634	not_sig
HDL	9	117148430	T	G	rs10733608	14.8484	1.42e-15	0.5312	-0.011	0.0012	-0.0101	0.0016	3.363e-10	-0.0127	0.0018	3.125e-12	1.08853	0.276362	not_sig	0.3849	not_sig
TC	9	117148430	T	G	rs10733608	15.6949	2.02e-16	0.5311	-0.011	0.0012	-0.011	0.0016	1.174e-12	-0.0121	0.0017	2.732e-12	0.474822	0.634914	not_sig	0.4955	not_sig
HDL	9	123480600	A	C	rs2416797	7.96084	1.09e-08	0.3195	0.0097	0.0013	0.0086	0.0017	4.689e-07	0.0119	0.002	1.161e-09	-1.26754	0.204962	not_sig	0.3446	not_sig
logTG	9	123481206	A	T	rs10984997	12.5818	2.62e-13	0.3139	-0.012	0.0013	-0.0115	0.0018	5.523e-11	-0.0115	0.002	8.269e-09	0	1	not_sig	0.6081	not_sig
HDL	9	126539944	A	G	rs4620350	9.8065	1.56e-10	0.1382	-0.015	0.0022	-0.0091	0.0028	0.00105	-0.0215	0.0033	7.32e-11	2.88875	0.0038678	not_sig	0.003882	not_sig
TC	9	130758224	A	G	rs80025019	12.8723	1.34e-13	0.8397	-0.042	0.0046	-0.0401	0.0055	2.535e-13	-0.0371	0.0058	1.197e-10	-0.378218	0.705268	not_sig	0.8988	not_sig
nonHDL	9	130770031	A	G	rs7874186	7.81358	1.54e-08	0.9051	-0.017	0.0031	-0.0152	0.0043	0.0004456	-0.0196	0.004	1.002e-06	0.752424	0.451796	not_sig	0.164	not_sig
nonHDL	9	131466489	T	G	rs13289095	21.3776	4.19e-22	0.8696	0.0245	0.0023	0.0238	0.0033	6.862e-13	0.0245	0.0031	2.523e-15	-0.155267	0.876611	not_sig	0.816	not_sig
TC	9	131466489	T	G	rs13289095	41.2894	5.14e-42	0.87	0.0272	0.0018	0.0265	0.0023	1.417e-29	0.0275	0.0027	1.783e-24	-0.284092	0.77634	not_sig	0.8133	not_sig
LDL	9	131468740	A	G	rs9697210	43.8062	1.56e-44	0.8691	0.0293	0.0019	0.0274	0.0025	1.988e-28	0.0298	0.0029	8.685e-25	-0.63127	0.527864	not_sig	0.6432	not_sig
HDL	9	131561110	A	G	rs6478851	8.0833	8.25e-09	0.7252	0.01	0.0014	0.0088	0.0019	2.492e-06	0.0108	0.0021	4.917e-07	-0.712082	0.476414	not_sig	0.4811	not_sig
HDL	9	132214501	C	G	rs1147348	8.31241	4.87e-09	0.4416	-0.009	0.0013	-0.0077	0.0017	6.475e-06	-0.0109	0.002	2.838e-08	1.22913	0.219023	not_sig	0.321	not_sig
HDL	9	136141870	T	C	rs2519093	17.3769	4.2e-18	0.8136	-0.015	0.0016	-0.0069	0.002	0.0006965	-0.0249	0.0023	1.78e-27	5.95435	2.61101e-09	sig	2.861e-07	sig
nonHDL	9	136141870	T	C	rs2519093	251.594	2.54e-252	0.8126	-0.066	0.0019	-0.0663	0.0027	7.96e-137	-0.0664	0.0025	3.58e-157	0.0272927	0.978226	not_sig	0.67	not_sig
TC	9	136141870	T	C	rs2519093	404.566	0	0.8117	-0.068	0.0015	-0.0654	0.0019	2.64e-250	-0.0737	0.0022	1.45e-253	2.87711	0.00401336	not_sig	0.1309	not_sig
LDL	9	136149399	A	G	rs507666	431.396	0	0.8159	-0.073	0.0016	-0.0737	0.0021	8.2e-273	-0.0761	0.0024	2.47e-225	0.757928	0.448494	not_sig	0.6705	not_sig
logTG	9	137175998	A	G	rs72619338	7.81712	1.52e-08	0.9679	0.0204	0.0039	0.0151	0.0051	0.00315	0.0258	0.0057	5.439e-06	-1.40721	0.159365	not_sig	0.0595	not_sig
HDL	9	137268682	T	C	rs35182096	7.59928	2.52e-08	0.287	0.0092	0.0015	0.0078	0.0019	3.388e-05	0.011	0.0021	2.958e-07	-1.13933	0.254565	not_sig	0.9579	not_sig
nonHDL	9	139108324	A	G	rs10858248	13.6166	2.42e-14	0.4843	-0.013	0.0015	-0.0117	0.0021	4.948e-08	-0.0134	0.002	1.828e-11	0.588721	0.556048	not_sig	0.6098	not_sig
TC	9	139108324	A	G	rs10858248	16.9162	1.21e-17	0.48	-0.012	0.0012	-0.0125	0.0016	1.346e-15	-0.0116	0.0018	3.553e-11	-0.376572	0.706492	not_sig	0.7941	not_sig
LDL	9	139371405	C	G	rs11999532	19.5032	3.14e-20	0.7439	0.0155	0.0015	0.0165	0.0019	9.153e-18	0.0135	0.0022	8.398e-10	1.03936	0.298639	not_sig	0.03199	not_sig
HDL	9	139973820	T	C	rs7037849	7.83125	1.47e-08	0.5951	-0.009	0.0013	-0.0063	0.0017	0.000145	-0.0133	0.0019	6.067e-12	2.76837	0.00563374	not_sig	0.004893	not_sig
TC	10	5247302	T	C	rs6601924	17.7707	1.7e-18	0.85	0.0166	0.0017	0.0174	0.0022	2.166e-15	0.0144	0.0024	3.91e-09	0.928535	0.35313	not_sig	0.2303	not_sig
HDL	10	5257647	A	G	rs75406471	11.6967	2.01e-12	0.8504	0.0136	0.0017	0.0117	0.0023	2.072e-07	0.0155	0.0026	1.339e-09	-1.10374	0.269704	not_sig	0.6869	not_sig
logTG	10	5267191	A	G	rs140107293	29.1688	6.78e-30	0.1498	-0.022	0.0018	-0.0223	0.0023	7.649e-22	-0.0214	0.0026	1.708e-16	-0.260795	0.794251	not_sig	0.4849	not_sig
nonHDL	10	8089033	A	G	rs263423	7.41123	3.88e-08	0.7953	0.0122	0.0019	0.0122	0.0028	1.495e-05	0.0124	0.0026	1.152e-06	-0.0525666	0.958077	not_sig	0.5755	not_sig
TC	10	8099021	T	C	rs2388486	8.00555	9.87e-09	0.796	0.011	0.0016	0.0106	0.0021	2.337e-07	0.012	0.0024	3.542e-07	-0.442365	0.658225	not_sig	0.6902	not_sig
HDL	10	13574659	C	G	rs7091423	7.79568	1.6e-08	0.5547	-0.007	0.0013	-0.005	0.0017	0.003275	-0.0088	0.0019	2.958e-06	1.50283	0.132883	not_sig	0.7061	not_sig
LDL	10	17259642	C	G	rs7903259	26.7471	1.79e-27	0.4345	0.0148	0.0013	0.0124	0.0016	3.987e-14	0.0176	0.0019	7.695e-20	-2.10824	0.0350102	not_sig	0.02364	not_sig
nonHDL	10	17259642	C	G	rs7903259	19.8338	1.47e-20	0.4475	0.0157	0.0015	0.0134	0.0021	3.673e-10	0.0171	0.002	1.094e-17	-1.28133	0.200076	not_sig	0.2147	not_sig
TC	10	17259642	C	G	rs7903259	47.7651	1.72e-48	0.4439	0.0186	0.0012	0.0168	0.0015	1.709e-27	0.0197	0.0018	1.208e-28	-1.24709	0.212363	not_sig	0.2197	not_sig
HDL	10	17265447	T	C	rs11254464	19.5353	2.92e-20	0.4484	0.0128	0.0013	0.0139	0.0016	6.154e-18	0.0116	0.0019	9.244e-10	0.93355	0.350536	not_sig	0.1852	not_sig
HDL	10	33630848	A	G	rs10827239	22.8585	1.39e-23	0.1074	-0.023	0.0021	-0.0247	0.0027	2.138e-20	-0.0207	0.003	3.823e-12	-0.999274	0.317662	not_sig	0.1374	not_sig
logTG	10	33633866	A	G	rs4934932	13.169	6.78e-14	0.8761	-0.018	0.002	-0.0213	0.0026	3.476e-16	-0.0138	0.003	3.353e-06	-1.90032	0.0573915	not_sig	0.38	not_sig
LDL	10	43918823	A	T	rs12354765	8.11613	7.65e-09	0.7594	0.0107	0.0016	0.0117	0.002	7.565e-09	0.0093	0.0025	0.0001685	0.75488	0.450321	not_sig	0.215	not_sig
LDL	10	45953767	A	G	rs7908745	8.64857	2.25e-09	0.3121	0.0097	0.0013	0.0085	0.0017	9.34e-07	0.0125	0.002	4.557e-10	-1.53467	0.124865	not_sig	0.08609	not_sig
nonHDL	10	45957247	CA	C	rs11394256	8.44049	3.63e-09	0.7686	-0.013	0.0019	-0.0116	0.0027	1.785e-05	-0.0146	0.0025	6.2e-09	0.818781	0.412912	not_sig	0.5029	not_sig
TC	10	45958856	C	G	rs2291428	37.7649	1.72e-38	0.7656	-0.021	0.0014	-0.0184	0.0019	3.173e-23	-0.0249	0.0021	1.274e-32	2.31287	0.0207296	not_sig	0.04573	not_sig
HDL	10	46026107	A	G	rs11239551	58.3838	4.13e-59	0.7685	-0.026	0.0015	-0.024	0.0019	1.029e-35	-0.0305	0.0022	7.252e-44	2.25451	0.0241643	not_sig	0.1353	not_sig
LDL	10	52573772	T	C	rs41274050	17.8482	1.42e-18	0.9915	-0.073	0.0076	-0.0776	0.0098	2.794e-15	-0.0691	0.0112	7.216e-10	-0.575213	0.565147	not_sig	0.6182	not_sig
logTG	10	52573772	T	C	rs41274050	26.5664	2.71e-27	0.9916	-0.089	0.0075	-0.088	0.0097	1.619e-19	-0.1029	0.0111	1.507e-20	1.01672	0.309286	not_sig	0.9838	not_sig
nonHDL	10	52573772	T	C	rs41274050	15.6042	2.49e-16	0.9916	-0.085	0.0093	-0.0977	0.014	3.386e-12	-0.0861	0.0121	1.272e-12	-0.629544	0.528993	not_sig	0.4801	not_sig
TC	10	52573772	T	C	rs41274050	23.6626	2.17e-24	0.9916	-0.081	0.0073	-0.0881	0.0096	5.326e-20	-0.0737	0.0108	7.544e-12	-1.00419	0.315286	not_sig	0.4593	not_sig
TC	10	54533360	A	G	rs1031101	8.56663	2.71e-09	0.1456	0.0115	0.0017	0.0084	0.0022	0.0001202	0.0135	0.0024	2.588e-08	-1.57851	0.114449	not_sig	0.1455	not_sig
LDL	10	54534837	A	T	rs11003128	9.37641	4.2e-10	0.1423	0.0119	0.0018	0.0107	0.0024	5.797e-06	0.0131	0.0027	9.526e-07	-0.669097	0.503433	not_sig	0.3602	not_sig
HDL	10	61409469	A	G	rs10826337	13.8705	1.35e-14	0.5642	0.011	0.0013	0.0103	0.0017	3.875e-10	0.0118	0.0019	3.95e-10	-0.593222	0.553032	not_sig	0.9204	not_sig
logTG	10	61469090	T	C	rs1171615	18.0083	9.81e-19	0.2213	-0.015	0.0015	-0.0144	0.002	4.531e-13	-0.017	0.0023	1.627e-13	0.858044	0.390868	not_sig	0.6332	not_sig
HDL	10	63837006	A	G	rs2393730	11.3489	4.48e-12	0.6042	-0.011	0.0013	-0.008	0.0017	1.66e-06	-0.0146	0.0019	1.235e-14	2.61018	0.00904951	not_sig	0.005559	not_sig
logTG	10	63837016	T	C	rs2393729	11.6164	2.42e-12	0.6037	0.0106	0.0013	0.0085	0.0017	2.622e-07	0.0138	0.0019	1.959e-13	-2.09109	0.0365201	not_sig	0.009685	not_sig
HDL	10	64988931	A	T	rs7916868	11.8625	1.37e-12	0.5078	0.0108	0.0013	0.0025	0.0016	0.1238	0.0231	0.0019	1.41e-35	-8.36136	6.20001e-17	sig	6.217e-11	sig
LDL	10	65128619	A	G	rs10761750	23.8991	1.26e-24	0.5381	-0.015	0.0013	-0.0166	0.0016	4.727e-24	-0.0131	0.0019	2.481e-12	-1.41901	0.155897	not_sig	0.02823	not_sig
logTG	10	65191645	T	G	rs7924036	102.252	5.59e-103	0.4956	0.029	0.0013	0.0291	0.0016	9.446e-71	0.032	0.0018	5.354e-67	-1.21125	0.225798	not_sig	0.6125	not_sig
TC	10	70409357	T	C	rs1977825	7.40092	3.97e-08	0.1627	-0.011	0.0018	-0.0107	0.0023	2.558e-06	-0.0091	0.0027	0.0007025	-0.454548	0.649435	not_sig	0.3141	not_sig
LDL	10	71094504	T	C	rs17476364	25.9733	1.06e-26	0.0958	-0.027	0.0023	-0.0282	0.003	1.385e-21	-0.0243	0.0033	2.789e-13	-0.88072	0.378469	not_sig	0.07777	not_sig
nonHDL	10	71094504	T	C	rs17476364	16.8588	1.38e-17	0.0974	-0.026	0.0027	-0.0329	0.0039	7.963e-17	-0.0196	0.0036	4.014e-08	-2.5166	0.0118495	not_sig	0.04723	not_sig
TC	10	71094504	T	C	rs17476364	35.434	3.68e-36	0.0959	-0.03	0.0022	-0.0332	0.0029	5.914e-31	-0.0264	0.0032	1.06e-16	-1.5867	0.11258	not_sig	0.05904	not_sig
HDL	10	71941078	A	G	rs9415951	8.96166	1.09e-09	0.3905	-0.008	0.0013	-0.0069	0.0017	4.407e-05	-0.0085	0.0019	9.952e-06	0.63277	0.526884	not_sig	0.3334	not_sig
LDL	10	74665640	A	C	rs11000443	26.0628	8.65e-27	0.9121	0.03	0.0028	0.0267	0.0037	3.391e-13	0.0312	0.0041	1.868e-14	-0.820637	0.411853	not_sig	0.9776	not_sig
nonHDL	10	74665640	A	C	rs11000443	10.5954	2.54e-11	0.8907	0.0176	0.003	0.0151	0.0041	0.0002417	0.0231	0.004	8.984e-09	-1.40264	0.160723	not_sig	0.2948	not_sig
HDL	10	74666065	A	G	rs2394931	8.61142	2.45e-09	0.768	0.016	0.0023	0.0138	0.003	3.587e-06	0.0177	0.0035	5.182e-07	-0.852997	0.393661	not_sig	0.6351	not_sig
logTG	10	74710484	C	G	rs7904738	26.3839	4.13e-27	0.8211	-0.024	0.002	-0.0252	0.0025	4.343e-23	-0.0229	0.003	4.241e-14	-0.592406	0.553578	not_sig	0.4576	not_sig
TC	10	74712546	T	C	rs7898735	13.9418	1.14e-14	0.1829	-0.013	0.0019	-0.0115	0.0023	9.451e-07	-0.0174	0.0027	2.34e-10	1.67614	0.0937099	not_sig	0.5696	not_sig
HDL	10	76861680	T	C	rs6480771	7.3995	3.99e-08	0.4543	-0.008	0.0013	-0.0068	0.0017	5.186e-05	-0.0103	0.0019	1.175e-07	1.38419	0.166302	not_sig	0.04933	not_sig
logTG	10	77257376	T	C	rs3012042	8.2341	5.83e-09	0.8375	-0.013	0.0018	-0.0097	0.0023	2.662e-05	-0.0182	0.0027	1.261e-11	2.41054	0.0159288	not_sig	0.09798	not_sig
HDL	10	80954251	A	G	rs703966	11.8208	1.51e-12	0.6001	-0.01	0.0013	-0.0083	0.0017	5.826e-07	-0.0118	0.0019	3.186e-10	1.38419	0.166302	not_sig	0.8568	not_sig
TC	10	81074125	A	T	rs1782652	10.7039	1.98e-11	0.5876	-0.011	0.0013	-0.0091	0.0017	1.151e-07	-0.0128	0.002	6.11e-11	1.42033	0.15551	not_sig	0.1647	not_sig
logTG	10	81094251	A	C	rs11002931	8.77001	1.7e-09	0.2751	0.0104	0.0014	0.0098	0.0019	1.173e-07	0.0114	0.0021	1.135e-07	-0.568315	0.569821	not_sig	0.5346	not_sig
nonHDL	10	82284512	A	T	rs7096909	7.61481	2.43e-08	0.8033	0.0132	0.002	0.0143	0.0029	7.85e-07	0.0116	0.0026	1.111e-05	0.696179	0.486317	not_sig	0.8014	not_sig
TC	10	82284512	A	T	rs7096909	7.63089	2.34e-08	0.8049	0.011	0.0016	0.0116	0.0021	3.875e-08	0.0095	0.0023	5.26e-05	0.679457	0.496848	not_sig	0.7599	not_sig
LDL	10	89805410	A	C	rs477418	8.92246	1.2e-09	0.9676	0.0235	0.0037	0.022	0.0048	3.974e-06	0.0278	0.0054	2.877e-07	-0.808493	0.418807	not_sig	0.5814	not_sig
nonHDL	10	89805410	A	C	rs477418	12.4773	3.33e-13	0.9691	0.0329	0.0043	0.0324	0.0062	1.49e-07	0.0332	0.0057	6.198e-09	-0.0953959	0.924	not_sig	0.5798	not_sig
TC	10	89805410	A	C	rs477418	10.4591	3.47e-11	0.968	0.0248	0.0035	0.0213	0.0045	1.795e-06	0.0324	0.005	6.967e-11	-1.66279	0.0963543	not_sig	0.1549	not_sig
LDL	10	91002804	T	C	rs1412445	8.12345	7.53e-09	0.645	0.0083	0.0013	0.008	0.0017	2.844e-06	0.0089	0.0019	4.755e-06	-0.355526	0.722195	not_sig	0.1847	not_sig
nonHDL	10	91010157	A	G	rs2250398	9.24538	5.68e-10	0.5228	-0.01	0.0015	-0.0096	0.0021	6.261e-06	-0.0101	0.002	2.9e-07	0.173153	0.862531	not_sig	0.8038	not_sig
TC	10	91011692	T	G	rs1332326	13.3247	4.73e-14	0.5311	-0.011	0.0012	-0.0096	0.0016	1.674e-09	-0.0117	0.0018	4.661e-11	0.878668	0.379582	not_sig	0.1465	not_sig
HDL	10	93575831	A	G	rs149590572	8.09344	8.06e-09	0.9381	0.0167	0.0027	0.0168	0.0035	1.72e-06	0.0166	0.004	3.132e-05	0.0379397	0.969736	not_sig	0.1917	not_sig
logTG	10	93622950	T	TGTTTTTTCA	rs144316780	14.9213	1.2e-15	0.9391	-0.025	0.0029	-0.0264	0.0036	4.185e-13	-0.0231	0.0043	1.127e-07	-0.591878	0.553932	not_sig	0.3036	not_sig
logTG	10	94215014	CTTGA	C	rs201503938	21.5617	2.74e-22	0.8961	-0.024	0.0024	-0.0259	0.0031	2.558e-17	-0.0244	0.0035	5.866e-12	-0.322713	0.746913	not_sig	0.7404	not_sig
HDL	10	94274809	A	G	rs17875327	10.1547	7e-11	0.1067	-0.017	0.0022	-0.0176	0.0029	1.24e-09	-0.0164	0.0032	3.012e-07	-0.280175	0.779343	not_sig	0.3916	not_sig
LDL	10	94839642	A	G	rs2068888	33.9017	1.25e-34	0.5407	0.0169	0.0013	0.014	0.0017	1.928e-17	0.0216	0.0019	8.962e-30	-3.00222	0.00268018	not_sig	0.006609	not_sig
HDL	10	94839724	T	G	rs4418728	45.5411	2.88e-46	0.5355	-0.02	0.0013	-0.0191	0.0016	1.934e-32	-0.0214	0.0019	5.184e-31	0.93355	0.350536	not_sig	0.2866	not_sig
logTG	10	94839724	T	G	rs4418728	104.302	4.99e-105	0.5405	0.0294	0.0013	0.0283	0.0016	6.679e-67	0.0326	0.0019	2.771e-67	-1.74123	0.0816424	not_sig	0.2189	not_sig
nonHDL	10	94839724	T	G	rs4418728	52.6117	2.45e-53	0.523	0.0249	0.0015	0.0253	0.0022	6.013e-32	0.0262	0.002	4.654e-39	-0.303997	0.76113	not_sig	0.4415	not_sig
TC	10	94839724	T	G	rs4418728	38.4674	3.41e-39	0.5331	0.0174	0.0012	0.0168	0.0015	1.728e-27	0.0193	0.0018	2.945e-28	-1.07508	0.282338	not_sig	0.07171	not_sig
HDL	10	95340811	T	G	rs8181419	18.0332	9.26e-19	0.1946	-0.018	0.0017	-0.0157	0.0022	2.285e-12	-0.0206	0.0026	8.048e-16	1.45051	0.146915	not_sig	0.2442	not_sig
logTG	10	95342772	A	T	rs7091593	13.274	5.32e-14	0.1161	0.0159	0.002	0.0106	0.0026	3.117e-05	0.0245	0.0029	4.36e-17	-3.58985	0.000330873	not_sig	0.002427	not_sig
logTG	10	96015793	C	G	rs3891783	12.0674	8.56e-13	0.4471	-0.011	0.0012	-0.0125	0.0016	1.177e-14	-0.0095	0.0018	2.198e-07	-1.25302	0.210198	not_sig	0.05804	not_sig
TC	10	96023077	T	C	rs57866767	18.545	2.85e-19	0.4484	-0.012	0.0012	-0.0167	0.0015	8.707e-28	-0.0071	0.0017	3.71e-05	-4.26684	1.98264e-05	sig	0.0002677	not_sig
LDL	10	96032866	T	C	rs61886339	8.86547	1.36e-09	0.2922	-0.01	0.0014	-0.015	0.0018	1.344e-16	-0.0045	0.002	0.0268	-3.93014	8.48975e-05	sig	0.0006453	not_sig
nonHDL	10	96038686	A	G	rs11187838	9.43557	3.67e-10	0.5589	0.0113	0.0015	0.016	0.0021	3.463e-14	0.007	0.002	0.000373	3.11676	0.0018285	not_sig	0.002425	not_sig
HDL	10	101912194	T	C	rs1408579	21.8026	1.58e-22	0.5502	-0.014	0.0013	-0.0153	0.0017	1.983e-19	-0.0133	0.0019	7.553e-12	-0.790963	0.428966	not_sig	0.5271	not_sig
logTG	10	101912194	T	C	rs1408579	10.5871	2.59e-11	0.5466	-0.01	0.0013	-0.0098	0.0017	7.51e-09	-0.0118	0.0019	8.565e-10	0.78909	0.430059	not_sig	0.7775	not_sig
nonHDL	10	102003906	C	G	rs17668357	12.2015	6.29e-13	0.5974	-0.013	0.0016	-0.016	0.0023	3.874e-12	-0.0112	0.0021	1.213e-07	-1.54778	0.121676	not_sig	0.2436	not_sig
TC	10	102003906	C	G	rs17668357	27.8678	1.36e-28	0.6023	-0.016	0.0013	-0.0169	0.0017	3.315e-23	-0.0156	0.0019	9.805e-17	-0.513817	0.60738	not_sig	0.4905	not_sig
LDL	10	102075479	A	G	rs603424	14.9156	1.21e-15	0.766	-0.015	0.0017	-0.0163	0.0022	5.565e-14	-0.0164	0.0025	5.878e-11	0.0302422	0.975874	not_sig	0.7494	not_sig
logTG	10	104142294	A	G	rs1057050	19.1852	6.53e-20	0.9417	0.0276	0.0027	0.0273	0.0035	1.275e-14	0.026	0.004	8.424e-11	0.246026	0.805662	not_sig	0.3829	not_sig
HDL	10	113934384	C	G	rs2803619	101.602	2.5e-102	0.2737	0.0319	0.0014	0.0283	0.0018	1.067e-55	0.0371	0.002	4.407e-74	-3.2976	0.000975135	not_sig	0.04331	not_sig
logTG	10	113934384	C	G	rs2803619	28.7039	1.98e-29	0.2753	-0.018	0.0014	-0.0155	0.0018	2.009e-17	-0.0204	0.0021	3.577e-23	1.78199	0.0747516	not_sig	0.2099	not_sig
TC	10	113934384	C	G	rs2803619	78.03	9.33e-79	0.2728	0.027	0.0013	0.0211	0.0017	3.846e-34	0.0345	0.0019	2.808e-71	-5.29627	1.18193e-07	sig	4.17e-05	sig
LDL	10	113940329	T	C	rs2792751	63.4387	3.64e-64	0.7257	-0.025	0.0014	-0.0221	0.0018	4.608e-33	-0.0283	0.0021	1.083e-41	2.25751	0.0239764	not_sig	0.01514	not_sig
nonHDL	10	113949664	T	C	rs10787429	21.3577	4.39e-22	0.728	-0.018	0.0017	-0.0106	0.0024	9.728e-06	-0.0232	0.0023	1.013e-24	3.8067	0.000140832	not_sig	0.0003735	not_sig
TC	10	114711983	A	G	rs7094463	12.2942	5.08e-13	0.5297	0.0102	0.0012	0.0106	0.0016	2.286e-11	0.0103	0.0018	9.642e-09	0.125524	0.900109	not_sig	0.6441	not_sig
HDL	10	115786233	A	G	rs72823013	42.5055	3.12e-43	0.8865	-0.031	0.0021	-0.0303	0.0027	1.583e-29	-0.0322	0.003	3.206e-26	0.474655	0.635033	not_sig	0.8775	not_sig
nonHDL	10	115786233	A	G	rs72823013	14.6296	2.35e-15	0.8854	0.0206	0.0025	0.018	0.0036	4.83e-07	0.0233	0.0033	1.185e-12	-1.0899	0.275758	not_sig	0.4435	not_sig
LDL	10	115798268	T	TAA	rs17875424	9.35859	4.38e-10	0.8861	0.0148	0.0022	0.0134	0.0028	1.42e-06	0.0198	0.0033	2.703e-09	-1.48927	0.136416	not_sig	0.9157	not_sig
logTG	10	115805056	C	G	rs1801253	9.78944	1.62e-10	0.2699	0.0107	0.0014	0.0112	0.0018	1.248e-09	0.0111	0.0021	9.57e-08	0.0363671	0.97099	not_sig	0.9017	not_sig
LDL	10	118397894	A	G	rs4751996	29.7066	1.97e-30	0.5167	0.0158	0.0013	0.0167	0.0016	1.291e-24	0.016	0.0019	1.022e-17	0.283802	0.776562	not_sig	0.4099	not_sig
TC	10	118397894	A	G	rs4751996	19.2831	5.21e-20	0.5084	0.0126	0.0012	0.0139	0.0015	8.724e-20	0.0126	0.0017	3.278e-13	0.577801	0.563399	not_sig	0.4053	not_sig
nonHDL	10	118398046	A	C	rs7910135	24.3517	4.45e-25	0.4987	-0.017	0.0015	-0.0192	0.0021	1.019e-19	-0.0171	0.002	2.728e-18	-0.727244	0.467076	not_sig	0.7183	not_sig
HDL	10	118407116	A	T	rs11197783	12.8388	1.45e-13	0.4649	0.0106	0.0013	0.0097	0.0016	1.926e-09	0.0126	0.0018	6.811e-12	-1.21413	0.224699	not_sig	0.951	not_sig
logTG	10	120493295	A	G	rs12772930	8.75264	1.77e-09	0.6618	-0.01	0.0014	-0.0108	0.0018	9.855e-10	-0.0091	0.002	4.708e-06	-0.635528	0.525084	not_sig	0.3347	not_sig
TC	10	121582556	T	C	rs2289307	8.52912	2.96e-09	0.3244	-0.009	0.0013	-0.0096	0.0017	1.276e-08	-0.0088	0.0019	3.333e-06	-0.316195	0.751854	not_sig	0.5941	not_sig
HDL	10	121641900	A	G	rs9420286	7.304	4.97e-08	0.3844	-0.009	0.0013	-0.0114	0.0017	4.884e-12	-0.0063	0.0019	0.0006886	-2.01696	0.0437001	not_sig	0.05074	not_sig
TC	10	122853958	T	G	rs73362918	8.68539	2.06e-09	0.1554	-0.013	0.0019	-0.0126	0.0023	6.516e-08	-0.0143	0.0027	9.564e-08	0.482957	0.629126	not_sig	0.451	not_sig
HDL	10	122929493	T	C	rs10886863	24.7433	1.81e-25	0.7345	-0.029	0.0025	-0.0304	0.0032	8.751e-22	-0.0273	0.0037	1.144e-13	-0.638936	0.522864	not_sig	0.2051	not_sig
logTG	10	122929493	T	C	rs10886863	20.4222	3.78e-21	0.7375	0.0284	0.0027	0.0296	0.0035	1.361e-17	0.0292	0.004	5.039e-13	0.0757002	0.939658	not_sig	0.6561	not_sig
LDL	10	124693587	T	G	rs7904973	49.8222	1.51e-50	0.4369	-0.02	0.0013	-0.0202	0.0016	9.15e-35	-0.0202	0.0019	3.75e-27	0	1	not_sig	0.5881	not_sig
nonHDL	10	124693587	T	G	rs7904973	32.4117	3.88e-33	0.4356	-0.02	0.0015	-0.0194	0.0021	4.367e-20	-0.0191	0.002	2.051e-22	-0.103892	0.917255	not_sig	0.8196	not_sig
TC	10	124693587	T	G	rs7904973	49.227	5.93e-50	0.4367	-0.019	0.0012	-0.0184	0.0015	1.701e-33	-0.0202	0.0017	7.946e-32	0.800032	0.423692	not_sig	0.8538	not_sig
HDL	10	126733319	A	G	rs4962724	9.13133	7.39e-10	0.27	-0.01	0.0014	-0.0068	0.0018	0.0001895	-0.0132	0.002	7.138e-11	2.39826	0.0164733	not_sig	0.007756	not_sig
logTG	10	134459388	A	G	rs1133400	10.9519	1.12e-11	0.2166	0.0121	0.0015	0.0123	0.002	7.428e-10	0.0126	0.0023	2.59e-08	-0.0990051	0.921134	not_sig	0.8079	not_sig
logTG	10	135436812	CGCTTTCCTCTCT	C	rs566663060	10.2366	5.8e-11	0.0851	0.0252	0.0041	0.0209	0.0052	5.842e-05	0.0306	0.0062	7.799e-07	-1.20572	0.227925	not_sig	0.6424	not_sig
logTG	11	380315	T	C	rs117291242	8.03657	9.19e-09	0.9652	-0.024	0.0037	-0.0184	0.0049	0.0001488	-0.0334	0.0055	9.482e-10	2.04835	0.0405261	not_sig	0.08634	not_sig
HDL	11	823586	C	G	rs140201358	16.0369	9.18e-17	0.0127	-0.056	0.006	-0.0429	0.0078	4.189e-08	-0.0745	0.0089	5.085e-17	2.69227	0.00709665	not_sig	0.09698	not_sig
LDL	11	1081287	A	G	rs151191319	11.0207	9.53e-12	0.9676	0.03	0.0038	0.0371	0.0049	5.795e-14	0.0197	0.0055	0.0003644	2.379	0.0173599	not_sig	0.05236	not_sig
HDL	11	2936657	A	G	rs440150	20.9396	1.15e-21	0.0954	-0.023	0.0021	-0.0238	0.0028	1.674e-17	-0.0228	0.0031	2.758e-13	-0.241373	0.809266	not_sig	0.4358	not_sig
TC	11	2942593	A	G	rs1661052	19.92	1.2e-20	0.0964	-0.022	0.0021	-0.0187	0.0027	6.352e-12	-0.0249	0.003	3.077e-16	1.54794	0.121636	not_sig	0.3839	not_sig
LDL	11	4993424	A	T	rs188513096	11.5713	2.68e-12	0.9989	0.1919	0.0253	0.2371	0.0352	1.53e-11	0.1584	0.0362	1.183e-05	1.56983	0.116455	not_sig	0.685	not_sig
nonHDL	11	4993424	A	T	rs188513096	7.54004	2.88e-08	0.9986	0.1805	0.0278	0.2229	0.0412	6.495e-08	0.156	0.0376	3.329e-05	1.20452	0.228387	not_sig	0.2906	not_sig
TC	11	5248004	A	G	rs11549407	31.6432	2.27e-32	0.9993	0.4299	0.0326	0.4881	0.0449	1.504e-27	0.3602	0.0468	1.481e-14	1.9873	0.0468896	not_sig	0.1458	not_sig
LDL	11	5701074	A	C	rs11601507	42.6473	2.25e-43	0.9199	-0.042	0.0028	-0.0306	0.0035	4.258e-18	-0.0576	0.0044	7.231e-40	4.83589	1.32552e-06	sig	0.004937	not_sig
nonHDL	11	5701074	A	C	rs11601507	27.8352	1.46e-28	0.9163	-0.041	0.0034	-0.0331	0.005	4.575e-11	-0.0487	0.0047	5.143e-25	2.28306	0.0224267	not_sig	0.2731	not_sig
TC	11	6092869	A	G	rs189043145	9.01636	9.63e-10	0.9938	-0.005	0.0098	0.0042	0.0128	0.7451	-0.0103	0.0139	0.4598	0.773276	0.439359	not_sig	0.2037	not_sig
HDL	11	10381766	A	T	rs2923078	14.236	5.81e-15	0.337	-0.012	0.0013	-0.0085	0.0017	1.045e-06	-0.0162	0.002	3.451e-16	2.9576	0.00310048	not_sig	0.4217	not_sig
logTG	11	10665235	T	C	rs11042906	16.2832	5.21e-17	0.724	0.0138	0.0015	0.0146	0.0019	2.156e-14	0.0132	0.0021	7.625e-10	0.497276	0.618995	not_sig	0.8625	not_sig
TC	11	12071547	A	G	rs11022130	7.3508	4.46e-08	0.2428	0.0095	0.0014	0.005	0.0018	0.005841	0.0151	0.0021	5.855e-13	-3.67954	0.000233655	not_sig	0.002278	not_sig
nonHDL	11	12071855	A	G	rs10765918	7.90833	1.24e-08	0.2679	0.0111	0.0017	0.0074	0.0024	0.001991	0.0149	0.0022	3.477e-11	-2.31346	0.0206972	not_sig	0.1303	not_sig
HDL	11	13355770	T	C	rs6486121	7.97055	1.07e-08	0.4117	0.0091	0.0013	0.0087	0.0017	3.017e-07	0.0099	0.0019	3.188e-07	-0.474578	0.635088	not_sig	0.8139	not_sig
logTG	11	13361524	T	C	rs6486122	31.4279	3.73e-32	0.3409	-0.017	0.0013	-0.0131	0.0017	3.578e-14	-0.0223	0.002	1.015e-29	3.52544	0.000422776	not_sig	0.007094	not_sig
logTG	11	13970901	T	G	rs1528662	8.12289	7.54e-09	0.9658	0.0243	0.0039	0.0228	0.0052	9.998e-06	0.0272	0.0055	8.584e-07	-0.584761	0.558708	not_sig	0.2703	not_sig
HDL	11	14012524	T	C	rs2618514	7.75089	1.77e-08	0.5138	0.0088	0.0013	0.0091	0.0016	2.037e-08	0.009	0.0018	9.451e-07	0.0418665	0.966605	not_sig	0.8591	not_sig
HDL	11	14865399	T	C	rs150090666	35.9401	1.15e-36	0.9991	-0.342	0.0249	-0.2706	0.0324	7.102e-17	-0.4581	0.0385	1.403e-32	3.75682	0.000172086	not_sig	8.362e-05	sig
logTG	11	14865399	T	C	rs150090666	27.8895	1.29e-28	0.9991	0.3025	0.0249	0.2214	0.0321	4.97e-12	0.4184	0.0385	1.664e-27	-3.953	7.71785e-05	sig	0.001213	not_sig
nonHDL	11	14865399	T	C	rs150090666	8.29321	5.09e-09	0.9991	0.2073	0.0317	0.1908	0.046	3.411e-05	0.2225	0.0433	2.771e-07	-0.503944	0.614301	not_sig	0.5194	not_sig
TC	11	17299762	A	G	rs214080	11.0289	9.36e-12	0.6078	0.0098	0.0012	0.0079	0.0016	6.633e-07	0.0117	0.0018	8.104e-11	-1.58997	0.111842	not_sig	0.2628	not_sig
nonHDL	11	18643559	A	G	rs10832954	31.2574	5.53e-32	0.3251	-0.021	0.0016	-0.0181	0.0023	2.935e-15	-0.022	0.0021	1.095e-24	1.25757	0.208547	not_sig	0.3608	not_sig
TC	11	18643559	A	G	rs10832954	42.1635	6.86e-43	0.3358	-0.019	0.0013	-0.0182	0.0017	1.249e-27	-0.0228	0.0019	6.659e-34	1.81812	0.0690455	not_sig	0.4504	not_sig
LDL	11	18645668	T	C	rs10832956	37.1436	7.19e-38	0.6732	0.0193	0.0014	0.018	0.0018	3.21e-23	0.0224	0.0021	2.525e-27	-1.6021	0.109133	not_sig	0.753	not_sig
logTG	11	26197972	A	T	rs72887658	10.3584	4.38e-11	0.0614	0.0206	0.0027	0.0195	0.0035	3.856e-08	0.0229	0.004	1.194e-08	-0.643452	0.519931	not_sig	0.3033	not_sig
logTG	11	27675712	T	C	rs1519480	21.2177	6.06e-22	0.3522	0.0142	0.0013	0.0172	0.0017	1.762e-23	0.0128	0.002	5.465e-11	1.68608	0.0917801	not_sig	0.1084	not_sig
HDL	11	27690399	T	C	rs2353487	21.5918	2.56e-22	0.3568	-0.015	0.0013	-0.0147	0.0017	5.364e-18	-0.0152	0.0019	3.664e-15	0.197741	0.843248	not_sig	0.8183	not_sig
HDL	11	29200527	T	C	rs2035837	9.4916	3.22e-10	0.1737	0.0129	0.0017	0.015	0.0021	1.47e-12	0.0113	0.0025	4.073e-06	1.14255	0.253227	not_sig	0.3166	not_sig
logTG	11	30402714	A	G	rs75160368	7.8711	1.35e-08	0.9149	0.0165	0.0024	0.0186	0.0032	4.559e-09	0.0142	0.0035	5.01e-05	0.93329	0.35067	not_sig	0.357	not_sig
HDL	11	32470828	T	C	rs11031793	13.5717	2.68e-14	0.5485	0.0113	0.0013	0.0132	0.0016	7.529e-16	0.0089	0.0019	2.031e-06	1.74533	0.0809271	not_sig	0.6712	not_sig
HDL	11	36328427	T	TA	rs5791099	7.33009	4.68e-08	0.3457	0.0102	0.0015	0.0076	0.0018	3.133e-05	0.0146	0.0022	2.145e-11	-2.48271	0.0130388	not_sig	0.018	not_sig
HDL	11	45913607	A	G	rs77403571	28.7008	1.99e-29	0.9418	-0.035	0.0029	-0.037	0.0038	1.428e-22	-0.0363	0.0042	5.332e-18	-0.124614	0.900829	not_sig	0.9731	not_sig
TC	11	46241757	T	C	rs61884130	11.6658	2.16e-12	0.9718	0.0336	0.004	0.033	0.0053	5.909e-10	0.0341	0.0057	1.905e-09	-0.142417	0.886751	not_sig	0.6069	not_sig
nonHDL	11	46349696	T	G	rs149903077	8.6492	2.24e-09	0.9909	0.0601	0.0086	0.0678	0.0125	5.609e-08	0.0533	0.0114	3.197e-06	0.860754	0.389374	not_sig	0.4879	not_sig
logTG	11	47272579	A	G	rs3758669	56.1351	7.33e-57	0.3543	-0.023	0.0013	-0.0244	0.0017	7.382e-46	-0.0198	0.002	7.466e-24	-1.76272	0.0779475	not_sig	0.3212	not_sig
HDL	11	47278917	T	C	rs3758673	172.559	2.76e-173	0.6358	-0.039	0.0013	-0.0415	0.0017	5.39e-132	-0.0366	0.0019	8.384e-79	-1.93786	0.0526404	not_sig	0.03748	not_sig
LDL	11	47974373	A	C	rs1631174	8.5947	2.54e-09	0.6419	-0.01	0.0014	-0.0107	0.0018	1.135e-09	-0.009	0.002	8.162e-06	-0.636308	0.524576	not_sig	0.4735	not_sig
TC	11	48021778	A	G	rs34895872	29.093	8.07e-30	0.2798	0.0175	0.0014	0.0159	0.0018	7.303e-19	0.0199	0.002	1.448e-22	-1.49801	0.134131	not_sig	0.1744	not_sig
logTG	11	56119093	T	C	rs4619163	8.47897	3.32e-09	0.0598	-0.02	0.003	-0.0231	0.0038	1.363e-09	-0.0177	0.0043	3.185e-05	-0.946559	0.343864	not_sig	0.4215	not_sig
TC	11	56225592	A	G	rs75230704	10.6488	2.25e-11	0.9587	-0.029	0.0036	-0.0262	0.0048	6.065e-08	-0.0311	0.0049	2.228e-10	0.719877	0.471601	not_sig	0.1803	not_sig
HDL	11	56652022	A	G	rs17640714	15.547	2.84e-16	0.9312	-0.024	0.0027	-0.0268	0.0035	3.313e-14	-0.0215	0.0039	3.705e-08	-1.01979	0.307829	not_sig	0.2219	not_sig
logTG	11	57119156	T	C	rs10792091	7.49977	3.16e-08	0.1267	0.0132	0.002	0.0128	0.0025	5.017e-07	0.0143	0.0028	4.579e-07	-0.401965	0.68771	not_sig	0.6528	not_sig
HDL	11	58162382	A	G	rs12575459	9.96663	1.08e-10	0.925	-0.018	0.0024	-0.0215	0.0032	1.094e-11	-0.0148	0.0035	2.01e-05	-1.42453	0.154294	not_sig	0.07226	not_sig
TC	11	60152584	A	G	rs950802	9.96269	1.09e-10	0.6648	0.0097	0.0013	0.0113	0.0017	2.276e-11	0.0089	0.0019	2.606e-06	0.948585	0.342832	not_sig	0.5231	not_sig
HDL	11	61588305	A	G	rs174564	215.289	5.14e-216	0.3521	-0.043	0.0013	-0.0407	0.0017	5.48e-127	-0.0462	0.0019	3.53e-126	2.17515	0.029619	not_sig	0.7005	not_sig
LDL	11	61588305	A	G	rs174564	199.745	1.8e-200	0.3497	-0.042	0.0014	-0.0368	0.0018	6.52e-98	-0.05	0.002	4.79e-138	4.94074	7.78252e-07	sig	0.02103	not_sig
logTG	11	61588305	A	G	rs174564	295.774	1.68e-296	0.3504	0.0513	0.0013	0.0533	0.0017	4.31e-208	0.0507	0.002	2.44e-146	0.996321	0.319094	not_sig	0.3183	not_sig
nonHDL	11	61588305	A	G	rs174564	90.4329	3.69e-91	0.3568	-0.034	0.0016	-0.0269	0.0022	1.922e-33	-0.0388	0.0021	6.383e-77	3.92948	8.51293e-05	sig	0.0001329	not_sig
TC	11	61588305	A	G	rs174564	199.521	3.01e-200	0.3521	-0.041	0.0013	-0.0307	0.0016	4.899e-79	-0.0535	0.0018	3.19e-188	9.53982	1.43081e-21	sig	1.128e-07	sig
logTG	11	62378221	A	G	rs11231161	11.4243	3.76e-12	0.3392	0.0108	0.0014	0.0072	0.0018	3.657e-05	0.016	0.002	8.115e-16	-3.28979	0.00100262	not_sig	0.0002594	not_sig
LDL	11	63615561	T	C	rs10751001	12.183	6.56e-13	0.6229	-0.011	0.0013	-0.0103	0.0017	2.967e-09	-0.0131	0.002	4.161e-11	1.07427	0.282703	not_sig	0.2437	not_sig
TC	11	63659778	T	C	rs10897459	11.0339	9.25e-12	0.3631	0.0105	0.0013	0.0095	0.0017	2.032e-08	0.0121	0.0019	3.095e-10	-1.02763	0.304122	not_sig	0.3974	not_sig
nonHDL	11	63669411	A	G	rs11605500	8.92254	1.2e-09	0.4336	0.011	0.0015	0.0098	0.0022	1.137e-05	0.0112	0.0021	7.395e-08	-0.462292	0.643872	not_sig	0.5609	not_sig
HDL	11	64004723	C	G	rs56271783	47.3963	4.02e-48	0.9548	0.0501	0.0032	0.0471	0.0041	4.966e-30	0.0556	0.0047	3.399e-32	-1.37409	0.169413	not_sig	0.5579	not_sig
logTG	11	64004723	C	G	rs56271783	56.7926	1.61e-57	0.9547	-0.054	0.0032	-0.0513	0.0041	5.564e-36	-0.0585	0.0046	2.455e-36	1.17534	0.239858	not_sig	0.3647	not_sig
TC	11	64162955	A	G	rs117073213	7.58649	2.59e-08	0.9633	0.0226	0.0035	0.0231	0.0047	7.027e-07	0.0214	0.0051	2.198e-05	0.247006	0.804903	not_sig	0.6284	not_sig
TC	11	65351074	A	G	rs10896018	11.2867	5.17e-12	0.699	-0.011	0.0013	-0.0117	0.0017	8.453e-12	-0.0095	0.0019	5.707e-07	-0.869537	0.384554	not_sig	0.5516	not_sig
HDL	11	65405600	T	G	rs2306363	28.3982	4e-29	0.7966	-0.02	0.0016	-0.021	0.002	5.009e-25	-0.0189	0.0023	1.55e-16	-0.694675	0.487259	not_sig	0.2962	not_sig
logTG	11	65473798	A	C	rs10750766	23.7133	1.94e-24	0.3547	-0.015	0.0013	-0.0146	0.0017	9.165e-17	-0.0151	0.002	3.528e-14	0.1916	0.848055	not_sig	0.3706	not_sig
LDL	11	65570517	T	C	rs7119612	9.66988	2.14e-10	0.8505	-0.014	0.002	-0.0148	0.0026	1.133e-08	-0.0144	0.003	1.531e-06	-0.101474	0.919174	not_sig	0.6635	not_sig
HDL	11	66066993	T	G	rs4930352	9.95636	1.11e-10	0.5373	-0.009	0.0013	-0.0094	0.0016	1.103e-08	-0.0119	0.0018	8.175e-11	1.04666	0.295256	not_sig	0.7101	not_sig
TC	11	66272976	A	C	rs10501397	14.8344	1.46e-15	0.7597	0.0125	0.0014	0.0095	0.0019	2.546e-07	0.0158	0.0021	2.382e-14	-2.24171	0.0249802	not_sig	0.1704	not_sig
nonHDL	11	66288123	T	C	rs11822028	11.0355	9.21e-12	0.247	-0.014	0.0017	-0.0097	0.0025	0.0001202	-0.0178	0.0023	1.494e-14	2.39462	0.0166376	not_sig	0.01236	not_sig
LDL	11	66302743	T	C	rs57596493	17.4464	3.58e-18	0.7626	0.0138	0.0015	0.0099	0.0019	2.563e-07	0.0181	0.0022	1.214e-16	-2.84091	0.00449853	not_sig	0.01515	not_sig
HDL	11	67372946	A	G	rs12794995	10.2418	5.73e-11	0.7596	-0.011	0.0015	-0.0083	0.0019	1.594e-05	-0.016	0.0022	2.223e-13	2.67072	0.0075688	not_sig	0.02662	not_sig
HDL	11	68597886	T	G	rs11605837	17.5024	3.15e-18	0.675	0.0132	0.0013	0.0112	0.0017	7.816e-11	0.0181	0.002	2.789e-20	-2.65031	0.00804171	not_sig	0.0371	not_sig
logTG	11	68613864	T	C	rs4365062	20.5967	2.53e-21	0.515	0.0138	0.0013	0.0132	0.0017	1.623e-15	0.0137	0.0019	3.329e-13	-0.197273	0.843614	not_sig	0.8935	not_sig
logTG	11	69305417	A	G	rs10796821	8.06519	8.61e-09	0.4829	0.009	0.0013	0.0081	0.0017	9.339e-07	0.0103	0.0019	4.963e-08	-0.867999	0.385395	not_sig	0.3414	not_sig
HDL	11	75455309	A	G	rs600626	63.3445	4.52e-64	0.2004	-0.029	0.0016	-0.0227	0.002	5.42e-30	-0.0375	0.0023	2.478e-60	4.8958	9.79055e-07	sig	0.0001066	not_sig
TC	11	75474195	A	C	rs72997616	28.8937	1.28e-29	0.8692	0.0237	0.0019	0.0209	0.0024	1.548e-18	0.0251	0.0026	1.469e-21	-1.19613	0.231645	not_sig	0.3957	not_sig
HDL	11	76156973	A	G	rs61894507	7.86134	1.38e-08	0.7001	-0.009	0.0014	-0.0109	0.0018	1.797e-09	-0.0074	0.002	0.0002134	-1.31155	0.189673	not_sig	0.4786	not_sig
HDL	11	77198233	T	C	rs11237204	7.64513	2.26e-08	0.2271	-0.011	0.0015	-0.0121	0.002	2.614e-09	-0.0099	0.0022	7.474e-06	-0.74608	0.455619	not_sig	0.5338	not_sig
logTG	11	78072383	T	C	rs10899485	13.3458	4.51e-14	0.2336	-0.012	0.0016	-0.0151	0.002	7.893e-14	-0.0101	0.0023	1.529e-05	-1.65009	0.0989256	not_sig	0.02672	not_sig
TC	11	78072875	A	T	rs11237469	13.1784	6.63e-14	0.209	-0.012	0.0016	-0.0144	0.002	5.357e-13	-0.0101	0.0022	5.531e-06	-1.45737	0.145014	not_sig	0.3537	not_sig
TC	11	95298828	A	T	rs7933222	9.54151	2.87e-10	0.8092	0.0102	0.0015	0.0099	0.0019	2.991e-07	0.0094	0.0022	1.406e-05	0.17332	0.8624	not_sig	0.5631	not_sig
HDL	11	95311260	T	G	rs12575636	9.03099	9.31e-10	0.1861	-0.012	0.0016	-0.0112	0.0021	1.419e-07	-0.0144	0.0024	2.728e-09	1.01173	0.311669	not_sig	0.4135	not_sig
nonHDL	11	103870621	A	ATCTTG	rs145567604	7.6971	2.01e-08	0.8163	0.0131	0.002	0.0167	0.0029	6.24e-09	0.01	0.0027	0.0002172	1.69817	0.0894755	not_sig	0.1044	not_sig
LDL	11	103870755	C	G	rs11226108	13.6048	2.48e-14	0.8153	0.0147	0.0017	0.0144	0.0022	3.393e-11	0.0147	0.0024	1.018e-09	-0.0928029	0.92606	not_sig	0.8468	not_sig
TC	11	103870755	C	G	rs11226108	14.6066	2.47e-15	0.8166	0.0144	0.0016	0.0127	0.002	5.727e-10	0.0152	0.0022	8.452e-12	-0.847308	0.396824	not_sig	0.8012	not_sig
HDL	11	103873662	A	C	rs72988923	8.57132	2.68e-09	0.1586	-0.012	0.0017	-0.0114	0.0023	5.199e-07	-0.0132	0.0025	1.924e-07	0.534272	0.593154	not_sig	0.5261	not_sig
TC	11	109957826	A	G	rs10891052	8.12162	7.56e-09	0.51	0.0069	0.0012	0.0086	0.0016	2.773e-08	0.0056	0.0017	0.001231	1.29497	0.195331	not_sig	0.8104	not_sig
HDL	11	109966513	A	C	rs10891054	25.2703	5.37e-26	0.7024	-0.016	0.0014	-0.0174	0.0018	1.344e-22	-0.0162	0.002	1.946e-15	-0.449673	0.652946	not_sig	0.5693	not_sig
logTG	11	111623694	A	AAAAC	rs112125399	8.6684	2.15e-09	0.6687	-0.01	0.0014	-0.0055	0.0018	0.002907	-0.0175	0.0022	6.546e-16	4.24613	2.17491e-05	sig	0.0007421	not_sig
HDL	11	111861156	T	C	rs603646	7.52067	3.02e-08	0.581	-0.009	0.0013	-0.006	0.0016	0.0002952	-0.0119	0.0019	2.174e-10	2.39476	0.0166313	not_sig	0.05898	not_sig
logTG	11	113579598	T	C	rs10891588	8.27876	5.26e-09	0.8345	-0.007	0.0023	-0.0064	0.0029	0.0311	-0.0036	0.0034	0.2962	-0.63024	0.528538	not_sig	0.8971	not_sig
logTG	11	114850006	T	C	rs10891789	10.8064	1.56e-11	0.6107	-0.003	0.0013	-0.003	0.0017	0.07542	-0.0034	0.0019	0.08346	0.157818	0.8746	not_sig	0.8208	not_sig
HDL	11	116014665	T	C	rs776902938	7.50206	3.15e-08	0.9993	-0.251	0.05	-0.2083	0.0671	0.001923	-0.3725	0.0653	1.19e-08	1.76833	0.0770053	not_sig	0.0776	not_sig
logTG	11	116139965	T	C	rs117288140	9.43872	3.64e-10	0.9838	-0.039	0.0055	-0.0457	0.0072	2.833e-10	-0.0321	0.0079	4.75e-05	-1.27988	0.200588	not_sig	0.5566	not_sig
HDL	11	116648917	C	G	rs964184	700.539	0	0.1633	-0.098	0.0017	-0.1021	0.0022	0	-0.0933	0.0025	3.15e-305	-2.66436	0.00771354	not_sig	7.444e-13	sig
LDL	11	116648917	C	G	rs964184	154.705	1.97e-155	0.1579	0.0405	0.0017	0.0236	0.0023	1.436e-25	0.0714	0.0026	2.96e-163	-13.8681	9.89049e-44	sig	3.232e-18	sig
logTG	11	116648917	C	G	rs964184	3750.87	0	0.1591	0.225	0.0017	0.2307	0.0022	0	0.2274	0.0026	0	0.974582	0.329768	not_sig	1.46e-06	sig
nonHDL	11	116648917	C	G	rs964184	801.118	0	0.1605	0.1244	0.002	0.1194	0.0029	0	0.1303	0.0027	0	-2.7627	0.00573262	not_sig	0.06882	not_sig
TC	11	116648917	C	G	rs964184	599.712	0	0.1649	0.0844	0.0016	0.079	0.0021	0	0.0923	0.0024	0	-4.20246	2.64026e-05	sig	0.006274	not_sig
HDL	11	117220429	A	C	rs192489212	243.685	2.07e-244	0.0016	0.6597	0.0195	0.6918	0.0245	1.44e-175	0.6117	0.0304	4.39e-90	2.06825	0.0386162	not_sig	0.004733	not_sig
LDL	11	117220429	A	C	rs192489212	13.1395	7.25e-14	0.0016	-0.145	0.0196	-0.1429	0.0244	4.444e-09	-0.1186	0.0305	9.845e-05	-0.626489	0.530994	not_sig	0.07118	not_sig
logTG	11	117220429	A	C	rs192489212	474.304	0	0.0016	-0.895	0.0194	-0.9241	0.0241	0	-0.8625	0.03	3.02e-181	-1.61005	0.107387	not_sig	0.002664	not_sig
logTG	11	117849058	C	G	rs747437837	26.1391	7.26e-27	0.0005	-0.414	0.0512	-0.5629	0.0691	3.598e-16	-0.4251	0.0681	4.311e-10	-1.42879	0.153065	not_sig	0.9572	not_sig
HDL	11	118122491	T	C	rs758391044	14.1546	7e-15	0.0018	0.1488	0.0264	0.1632	0.0353	3.732e-06	0.18	0.034	1.233e-07	-0.345635	0.729617	not_sig	0.9553	not_sig
LDL	11	118449370	A	G	rs17122278	19.0381	9.16e-20	0.1824	0.0187	0.0018	0.0213	0.0024	3.041e-18	0.0162	0.0027	2.17e-09	1.42183	0.155075	not_sig	0.3541	not_sig
TC	11	118449396	A	G	rs73023350	22.7619	1.73e-23	0.7906	-0.018	0.0016	-0.0193	0.0021	2.012e-20	-0.0184	0.0023	2.554e-15	-0.291196	0.770901	not_sig	0.6333	not_sig
nonHDL	11	118449746	T	C	rs11216909	13.3489	4.48e-14	0.7793	-0.016	0.002	-0.0184	0.0028	3.131e-11	-0.0142	0.0027	9.011e-08	-1.0844	0.278187	not_sig	0.4046	not_sig
HDL	11	118928249	A	G	rs11217133	25.1066	7.82e-26	0.6412	0.0156	0.0013	0.0148	0.0017	4.255e-18	0.0171	0.0019	6.209e-19	-0.909607	0.36303	not_sig	0.8106	not_sig
TC	11	118980039	T	C	rs510435	8.92702	1.18e-09	0.6335	0.008	0.0013	0.0087	0.0017	1.767e-07	0.0085	0.0019	5.558e-06	0.0790488	0.936994	not_sig	0.9012	not_sig
logTG	11	119834755	T	G	rs748962992	7.84822	1.42e-08	0.999	0.158	0.0303	0.2123	0.0427	6.471e-07	0.1471	0.0393	0.0001834	1.13015	0.258413	not_sig	0.6305	not_sig
logTG	11	120559994	A	C	rs772703454	7.85003	1.41e-08	0.9993	0.1647	0.0359	0.3264	0.0507	1.226e-10	0.0869	0.0472	0.06576	3.47795	0.000505268	not_sig	0.003229	not_sig
LDL	11	121330087	A	G	rs3862606	10.0767	8.38e-11	0.4275	0.0086	0.0013	0.0075	0.0017	1.16e-05	0.01	0.0019	2.055e-07	-0.987573	0.323362	not_sig	0.5172	not_sig
HDL	11	121801129	T	C	rs1666658	8.76076	1.73e-09	0.3761	-0.01	0.0013	-0.0117	0.0017	1.172e-11	-0.007	0.002	0.0003322	-1.80529	0.07103	not_sig	0.06796	not_sig
HDL	11	122517803	A	G	rs10892870	66.0059	9.87e-67	0.3919	0.0234	0.0013	0.0251	0.0016	2.54e-54	0.0211	0.0019	9.457e-30	1.62356	0.104469	not_sig	0.05471	not_sig
LDL	11	122523596	A	G	rs7930518	27.8341	1.47e-28	0.6049	-0.016	0.0013	-0.0164	0.0017	1.802e-22	-0.0143	0.0019	6.594e-14	-0.829561	0.406787	not_sig	0.1425	not_sig
TC	11	122523596	A	G	rs7930518	59.4694	3.39e-60	0.6055	-0.022	0.0012	-0.0215	0.0016	1.354e-42	-0.0207	0.0018	6.852e-32	-0.334731	0.737828	not_sig	0.2286	not_sig
nonHDL	11	122527120	A	G	rs7129071	23.9663	1.08e-24	0.6439	-0.016	0.0015	-0.0159	0.0022	9.816e-13	-0.0168	0.0021	2.952e-16	0.297188	0.766323	not_sig	0.88	not_sig
HDL	11	126225876	C	G	rs112771035	39.6141	2.43e-40	0.0715	-0.036	0.0024	-0.034	0.0031	1.501e-27	-0.0371	0.0035	4.067e-26	0.668521	0.503801	not_sig	0.9814	not_sig
LDL	11	126225876	C	G	rs112771035	123.646	2.26e-124	0.0693	0.0622	0.0025	0.062	0.0033	1.488e-79	0.0634	0.0037	2.915e-66	-0.284395	0.776108	not_sig	0.6096	not_sig
nonHDL	11	126225876	C	G	rs112771035	88.9888	1.03e-89	0.0732	0.0597	0.0028	0.0624	0.004	2.42e-55	0.0547	0.0038	1.635e-47	1.40161	0.161032	not_sig	0.07147	not_sig
TC	11	126238633	T	C	rs74612335	76.9061	1.24e-77	0.158	0.0341	0.0017	0.037	0.0022	9.699e-65	0.0284	0.0025	8.252e-31	2.60224	0.00926161	not_sig	0.003095	not_sig
logTG	12	508859	T	G	rs2369280	7.37415	4.23e-08	0.2814	0.0093	0.0015	0.0074	0.0019	0.0001207	0.0109	0.0021	3.035e-07	-1.24319	0.213798	not_sig	0.4736	not_sig
LDL	12	623129	A	G	rs35882350	26.3964	4.01e-27	0.2474	0.0182	0.0015	0.0156	0.002	3.076e-15	0.024	0.0023	3.161e-26	-2.77553	0.00551117	not_sig	0.1356	not_sig
nonHDL	12	623129	A	G	rs35882350	28.5086	3.1e-29	0.2476	0.0216	0.0018	0.019	0.0027	1.292e-12	0.0236	0.0025	5.954e-22	-1.25546	0.209311	not_sig	0.2247	not_sig
TC	12	623129	A	G	rs35882350	21.8293	1.48e-22	0.246	0.0164	0.0015	0.0129	0.0019	1.67e-11	0.0229	0.0022	4.406e-26	-3.4664	0.000527483	not_sig	0.008159	not_sig
HDL	12	2908330	A	C	rs56196860	10.2347	5.82e-11	0.9748	-0.031	0.0043	-0.0322	0.0055	3.896e-09	-0.0289	0.0065	8.632e-06	-0.390751	0.695981	not_sig	0.9109	not_sig
LDL	12	4384844	T	G	rs76895963	18.5952	2.54e-19	0.0176	-0.054	0.0055	-0.0534	0.0074	4.178e-13	-0.0571	0.0079	4.792e-13	0.344264	0.730648	not_sig	0.47	not_sig
logTG	12	4384844	T	G	rs76895963	68.59	2.57e-69	0.0175	-0.102	0.0055	-0.1132	0.0073	1.699e-54	-0.0857	0.0078	5.63e-28	-2.58938	0.0096148	not_sig	0.000173	not_sig
nonHDL	12	4384844	T	G	rs76895963	28.3362	4.61e-29	0.0177	-0.075	0.0063	-0.0806	0.0095	2.372e-17	-0.0732	0.0085	5.501e-18	-0.582981	0.559906	not_sig	0.6892	not_sig
TC	12	4384844	T	G	rs76895963	34.6841	2.07e-35	0.0175	-0.073	0.0053	-0.0752	0.0072	7.05e-26	-0.0721	0.0076	1.689e-21	-0.298397	0.7654	not_sig	0.1548	not_sig
HDL	12	4388084	C	G	rs3217805	7.65037	2.24e-08	0.3685	0.0095	0.0014	0.0096	0.0018	8.54e-08	0.009	0.0021	1.833e-05	0.218717	0.82687	not_sig	0.7239	not_sig
HDL	12	6713450	A	G	rs1734114	21.0004	9.99e-22	0.2317	-0.016	0.0016	-0.0155	0.002	1.797e-14	-0.0173	0.0023	6.375e-14	0.595435	0.551552	not_sig	0.8888	not_sig
logTG	12	6739497	T	C	rs35104374	7.75762	1.75e-08	0.7179	-0.01	0.0015	-0.0104	0.002	1.247e-07	-0.0111	0.0022	4.426e-07	0.236826	0.812792	not_sig	0.3652	not_sig
nonHDL	12	7625014	T	C	rs117692263	7.64642	2.26e-08	0.0853	-0.018	0.0026	-0.0134	0.0037	0.0003443	-0.0223	0.0035	2.497e-10	1.75494	0.0792689	not_sig	0.0965	not_sig
HDL	12	7681181	T	G	rs7305678	25.2423	5.72e-26	0.7586	-0.019	0.0017	-0.0202	0.0021	3.746e-21	-0.0201	0.0024	2.431e-16	-0.0316164	0.974778	not_sig	0.1379	not_sig
HDL	12	9082581	A	G	rs4883201	35.0811	8.3e-36	0.1348	-0.028	0.002	-0.0256	0.0026	1.705e-22	-0.03	0.003	3.416e-24	1.11749	0.263786	not_sig	0.4698	not_sig
LDL	12	9082581	A	G	rs4883201	27.7716	1.69e-28	0.1345	-0.024	0.002	-0.0242	0.0026	3.349e-20	-0.0236	0.003	2.054e-15	-0.152211	0.87902	not_sig	0.2386	not_sig
nonHDL	12	9082581	A	G	rs4883201	22.9688	1.07e-23	0.1453	-0.025	0.0023	-0.0268	0.0034	1.291e-15	-0.0224	0.0032	1.399e-12	-0.946416	0.343936	not_sig	0.0979	not_sig
TC	12	9082581	A	G	rs4883201	52.1854	6.53e-53	0.1335	-0.032	0.0019	-0.0316	0.0026	4.992e-35	-0.0329	0.0029	1.192e-30	0.336336	0.736618	not_sig	0.5417	not_sig
HDL	12	13345397	T	G	rs74976859	7.65158	2.23e-08	0.1503	0.0128	0.0018	0.0103	0.0023	9.93e-06	0.0133	0.0026	3.078e-07	-0.871376	0.383549	not_sig	0.5716	not_sig
HDL	12	16503789	T	G	rs9332891	14.5181	3.03e-15	0.0279	-0.129	0.0134	-0.131	0.0163	9.467e-16	-0.1284	0.0233	3.828e-08	-0.0921503	0.926579	not_sig	0.7868	not_sig
logTG	12	20470199	A	G	rs11045171	30.7452	1.8e-31	0.1959	-0.02	0.0016	-0.0157	0.0021	6.634e-14	-0.0231	0.0024	1.177e-22	2.33409	0.019591	not_sig	0.1093	not_sig
HDL	12	20470221	A	C	rs11045172	52.7584	1.74e-53	0.1951	0.0267	0.0016	0.0257	0.0021	1.901e-35	0.0277	0.0023	4.541e-33	-0.647492	0.517314	not_sig	0.4889	not_sig
logTG	12	21343833	A	C	rs73079476	43.8456	1.43e-44	0.1532	0.0263	0.0017	0.0302	0.0023	5.297e-41	0.0219	0.0025	8.927e-18	2.45774	0.0139815	not_sig	0.05743	not_sig
logTG	12	22747967	T	G	rs11046481	15.8627	1.37e-16	0.2233	-0.016	0.0016	-0.015	0.0021	1.859e-12	-0.0159	0.0023	4.325e-12	0.29068	0.771296	not_sig	0.8747	not_sig
nonHDL	12	25408464	A	G	rs12320328	25.5824	2.62e-26	0.0848	-0.027	0.0027	-0.0209	0.004	1.213e-07	-0.0308	0.0037	3.947e-17	1.82468	0.0680501	not_sig	0.1435	not_sig
LDL	12	25409070	T	C	rs75667995	22.37	4.27e-23	0.0662	-0.029	0.0027	-0.0244	0.0035	2.249e-12	-0.0324	0.0039	2.228e-16	1.53754	0.124161	not_sig	0.4606	not_sig
logTG	12	25409070	T	C	rs75667995	10.3066	4.94e-11	0.0662	-0.02	0.0027	-0.0165	0.0034	1.494e-06	-0.0241	0.0039	5.789e-10	1.47752	0.139535	not_sig	0.266	not_sig
TC	12	25409070	T	C	rs75667995	31.6204	2.4e-32	0.0662	-0.033	0.0026	-0.0273	0.0034	6.474e-16	-0.0391	0.0038	4.057e-25	2.33194	0.0197039	not_sig	0.03254	not_sig
HDL	12	26440698	A	G	rs12814794	14.7608	1.73e-15	0.3154	-0.012	0.0014	-0.0104	0.0018	1.007e-08	-0.0131	0.002	1.403e-10	1.01176	0.31165	not_sig	0.2111	not_sig
logTG	12	26472562	A	G	rs7132434	21.2423	5.72e-22	0.6822	-0.015	0.0014	-0.0132	0.0018	4.763e-13	-0.0171	0.0021	1.011e-16	1.41831	0.156099	not_sig	0.002485	not_sig
TC	12	26803949	T	C	rs7969023	9.41526	3.84e-10	0.3815	0.009	0.0012	0.0072	0.0016	6.425e-06	0.0115	0.0018	8.406e-11	-1.79918	0.0719908	not_sig	0.2212	not_sig
LDL	12	29491528	A	G	rs966541	7.9887	1.03e-08	0.3147	-0.009	0.0014	-0.0079	0.0018	7.576e-06	-0.0107	0.002	1.263e-07	1.04804	0.294622	not_sig	0.4217	not_sig
TC	12	29491528	A	G	rs966541	21.4705	3.38e-22	0.3191	-0.014	0.0013	-0.0131	0.0016	1.843e-15	-0.0141	0.0019	3.39e-14	0.405649	0.685	not_sig	0.9927	not_sig
nonHDL	12	29496991	T	C	rs10843390	13.4185	3.81e-14	0.688	0.0137	0.0016	0.012	0.0023	1.391e-07	0.0143	0.0021	1.81e-11	-0.741644	0.458303	not_sig	0.3844	not_sig
logTG	12	29508642	A	G	rs10843391	15.4405	3.63e-16	0.3257	-0.012	0.0013	-0.0116	0.0017	2.211e-11	-0.0135	0.002	1.367e-11	0.728081	0.466564	not_sig	0.5214	not_sig
HDL	12	33588388	T	C	rs11052705	8.01402	9.68e-09	0.6148	-0.009	0.0014	-0.0093	0.0018	1.346e-07	-0.0094	0.002	2.173e-06	0.0374728	0.970108	not_sig	0.7459	not_sig
nonHDL	12	40565161	A	C	rs2638250	13.6583	2.2e-14	0.8298	-0.018	0.0023	-0.0184	0.0032	1.224e-08	-0.0179	0.0031	7.545e-09	-0.112707	0.910263	not_sig	0.6013	not_sig
TC	12	40565161	A	C	rs2638250	14.9469	1.13e-15	0.8392	-0.016	0.0019	-0.0163	0.0024	1.712e-11	-0.0165	0.0027	9.638e-10	0.0557884	0.95551	not_sig	0.5183	not_sig
LDL	12	40580318	T	C	rs11175518	17.0437	9.04e-18	0.1216	0.0204	0.0023	0.0196	0.0031	3.381e-10	0.0209	0.0034	1.294e-09	-0.28456	0.775981	not_sig	0.8237	not_sig
logTG	12	46224063	A	G	rs7298844	15.7889	1.63e-16	0.1933	0.0154	0.0016	0.0171	0.0022	2.253e-15	0.0136	0.0024	7.968e-09	1.08137	0.279532	not_sig	0.5079	not_sig
TC	12	46322449	T	C	rs10880868	10.6002	2.51e-11	0.8032	-0.012	0.0016	-0.0132	0.002	8.935e-11	-0.0115	0.0023	5.189e-07	-0.562019	0.574103	not_sig	0.8927	not_sig
logTG	12	48143315	A	G	rs145878042	9.44344	3.6e-10	0.0111	0.0443	0.0064	0.0452	0.0083	5.534e-08	0.0401	0.0094	2.042e-05	0.409095	0.68247	not_sig	0.03109	not_sig
HDL	12	49399132	C	G	rs1126930	10.0363	9.2e-11	0.9671	0.0295	0.0038	0.0282	0.0049	7.24e-09	0.0296	0.0056	1.112e-07	-0.189698	0.849545	not_sig	0.7077	not_sig
logTG	12	49399132	C	G	rs1126930	8.88631	1.3e-09	0.9668	-0.027	0.0037	-0.0288	0.0048	2.453e-09	-0.0285	0.0055	1.79e-07	-0.0413375	0.967027	not_sig	0.838	not_sig
LDL	12	50127304	A	ATAATAT	rs149806222	7.95915	1.1e-08	0.9738	0.0296	0.0047	0.0265	0.006	1.113e-05	0.0285	0.0071	5.568e-05	-0.216675	0.828461	not_sig	0.9389	not_sig
nonHDL	12	50127304	A	ATAATAT	rs149806222	8.84879	1.42e-09	0.9726	0.0356	0.0053	0.0309	0.0075	3.522e-05	0.0297	0.007	2.493e-05	0.11747	0.906488	not_sig	0.7082	not_sig
TC	12	50127304	A	ATAATAT	rs149806222	13.9667	1.08e-14	0.9725	0.0365	0.0043	0.0351	0.0054	9.611e-11	0.0364	0.0062	4.68e-09	-0.159324	0.873414	not_sig	0.7541	not_sig
HDL	12	50263148	A	G	rs7132908	14.8524	1.4e-15	0.6361	0.0122	0.0013	0.0145	0.0017	1.527e-17	0.0097	0.0019	5.205e-07	1.89831	0.0576551	not_sig	0.02249	not_sig
LDL	12	51103633	T	C	rs2251024	26.6079	2.47e-27	0.6745	0.0165	0.0014	0.0165	0.0018	1.853e-19	0.0176	0.0021	2.989e-17	-0.400525	0.68877	not_sig	0.965	not_sig
nonHDL	12	51103633	T	C	rs2251024	18.7906	1.62e-19	0.6704	0.0166	0.0017	0.0159	0.0024	6.649e-11	0.0173	0.0022	1.42e-14	-0.431846	0.665853	not_sig	0.9324	not_sig
TC	12	51103633	T	C	rs2251024	33.865	1.36e-34	0.6738	0.0183	0.0014	0.0179	0.0018	1.158e-23	0.0202	0.002	3.413e-24	-0.861356	0.389042	not_sig	0.7957	not_sig
HDL	12	51211692	A	G	rs11169570	11.2449	5.69e-12	0.3781	0.0096	0.0013	0.0078	0.0016	1.393e-06	0.0128	0.0019	6.281e-12	-2.02946	0.0424119	not_sig	0.4183	not_sig
TC	12	51779544	A	AG	rs61177162	22.3367	4.61e-23	0.5288	0.016	0.0015	0.0164	0.0018	5.314e-19	0.0151	0.0022	4.496e-12	0.460801	0.644941	not_sig	0.06187	not_sig
LDL	12	51783420	A	T	rs10876169	17.6234	2.38e-18	0.6124	0.0127	0.0013	0.0137	0.0017	2.813e-15	0.0118	0.002	3.312e-09	0.728967	0.466022	not_sig	0.08464	not_sig
nonHDL	12	51788340	T	C	rs907348	12.3987	3.99e-13	0.6282	-0.011	0.0016	-0.0119	0.0022	8.51e-08	-0.0098	0.0021	2.46e-06	-0.693438	0.488035	not_sig	0.3707	not_sig
LDL	12	53265945	T	C	rs7316678	9.70514	1.97e-10	0.4017	-0.01	0.0013	-0.0096	0.0017	7.031e-09	-0.0109	0.0019	6.741e-09	0.513538	0.607575	not_sig	0.6792	not_sig
TC	12	53443278	T	G	rs11170385	8.3814	4.16e-09	0.5423	-0.008	0.0013	-0.0093	0.0016	1.731e-08	-0.007	0.0019	0.0001784	-0.932994	0.350823	not_sig	0.6178	not_sig
LDL	12	53793314	A	C	rs2608301	11.6184	2.41e-12	0.7717	-0.013	0.0016	-0.0107	0.0021	3.051e-07	-0.016	0.0024	1.935e-11	1.67376	0.0941782	not_sig	0.6086	not_sig
HDL	12	53796744	T	C	rs11170538	20.705	1.97e-21	0.5191	-0.014	0.0014	-0.0156	0.0018	5.788e-18	-0.0106	0.0022	1.131e-06	-1.77336	0.0761686	not_sig	0.06409	not_sig
logTG	12	53796754	A	G	rs10783578	11.2171	6.07e-12	0.4866	-0.009	0.0014	-0.0117	0.0018	7.553e-11	-0.0061	0.0021	0.004294	-2.03655	0.0416947	not_sig	0.1344	not_sig
nonHDL	12	53801461	A	C	rs80297745	10.3404	4.57e-11	0.8238	-0.014	0.0019	-0.0132	0.0027	1.358e-06	-0.014	0.0025	3.38e-08	0.218341	0.827163	not_sig	0.6997	not_sig
HDL	12	56470625	T	C	rs11171739	14.3131	4.86e-15	0.4258	0.0104	0.0013	0.0089	0.0017	1.029e-07	0.0129	0.0019	1.47e-11	-1.58193	0.113666	not_sig	0.5395	not_sig
logTG	12	56941146	A	C	rs7312441	10.7621	1.73e-11	0.6579	0.0098	0.0013	0.0109	0.0017	3.128e-10	0.0107	0.002	5.836e-08	0.0766401	0.93891	not_sig	0.329	not_sig
TC	12	57313335	A	T	rs9739473	8.85382	1.4e-09	0.5963	0.0079	0.0012	0.0072	0.0016	6.387e-06	0.0101	0.0018	1.52e-08	-1.2134	0.224978	not_sig	0.4085	not_sig
LDL	12	57645789	A	T	rs11172134	14.2516	5.6e-15	0.7982	0.0146	0.0016	0.0119	0.0021	1.34e-08	0.0191	0.0024	6.214e-16	-2.27378	0.0229789	not_sig	0.5958	not_sig
nonHDL	12	57692470	T	C	rs12313762	29.9724	1.07e-30	0.7622	0.0226	0.0018	0.0244	0.0026	2.836e-20	0.021	0.0024	2.183e-18	0.96501	0.33454	not_sig	0.1404	not_sig
HDL	12	57823585	A	C	rs7964492	63.6596	2.19e-64	0.2373	0.0277	0.0015	0.0258	0.0019	2.972e-40	0.0315	0.0022	5.068e-47	-1.97703	0.0480384	not_sig	0.342	not_sig
logTG	12	57823585	A	C	rs7964492	51.3742	4.22e-52	0.2394	-0.024	0.0015	-0.0261	0.0019	3.208e-41	-0.022	0.0022	8.837e-24	-1.41872	0.15598	not_sig	0.01576	not_sig
TC	12	58256010	T	C	rs10877029	7.50145	3.15e-08	0.3777	0.0086	0.0013	0.0076	0.0017	5.355e-06	0.0105	0.0019	1.47e-08	-1.14621	0.251709	not_sig	0.4904	not_sig
logTG	12	62838230	T	C	rs113439801	8.04874	8.94e-09	0.842	0.0127	0.0018	0.0124	0.0023	1.207e-07	0.0139	0.0026	1.123e-07	-0.434658	0.663811	not_sig	0.9685	not_sig
logTG	12	63503447	T	C	rs12229749	10.0887	8.15e-11	0.6557	0.0097	0.0013	0.0086	0.0018	9.611e-07	0.0115	0.0019	3.682e-09	-1.1146	0.265023	not_sig	0.1532	not_sig
logTG	12	66206798	T	C	rs2947795	10.8707	1.35e-11	0.2299	0.0125	0.0017	0.0123	0.0022	2.772e-08	0.0124	0.0026	1.723e-06	-0.0295328	0.97644	not_sig	0.4315	not_sig
TC	12	66260924	A	G	rs343087	7.93578	1.16e-08	0.7689	-0.011	0.0017	-0.0106	0.0022	1.306e-06	-0.0107	0.0025	1.607e-05	0.0302586	0.975861	not_sig	0.4554	not_sig
HDL	12	67689927	T	TA	rs139934847	9.18994	6.46e-10	0.4631	-0.01	0.0013	-0.0082	0.0017	1.156e-06	-0.0115	0.002	1.296e-08	1.26754	0.204962	not_sig	0.253	not_sig
logTG	12	69722880	T	C	rs4761233	10.2197	6.03e-11	0.4281	-0.009	0.0013	-0.0088	0.0017	9.121e-08	-0.0104	0.0019	2.575e-08	0.631272	0.527863	not_sig	0.5202	not_sig
HDL	12	69868820	CAT	C	rs56339634	10.215	6.1e-11	0.3522	-0.011	0.0014	-0.011	0.0018	6.742e-10	-0.0116	0.0021	3.9e-08	0.218717	0.82687	not_sig	0.6887	not_sig
LDL	12	72179446	T	C	rs61754230	14.8703	1.35e-15	0.9844	-0.049	0.0056	-0.048	0.0071	1.086e-11	-0.0587	0.0085	6.307e-12	0.972943	0.330582	not_sig	0.4311	not_sig
nonHDL	12	72179446	T	C	rs61754230	12.7852	1.64e-13	0.985	-0.058	0.0069	-0.0542	0.0104	1.832e-07	-0.064	0.0092	3.479e-12	0.708794	0.478453	not_sig	0.3621	not_sig
TC	12	72179446	T	C	rs61754230	14.388	4.09e-15	0.9846	-0.048	0.0054	-0.0471	0.0069	1.025e-11	-0.0548	0.0083	4.021e-11	0.718809	0.472258	not_sig	0.4543	not_sig
HDL	12	89674799	T	C	rs2126606	9.71043	1.95e-10	0.3746	-0.011	0.0013	-0.01	0.0017	7.842e-09	-0.0109	0.002	2.905e-08	0.345693	0.729573	not_sig	0.9621	not_sig
nonHDL	12	89874816	CAGGGCCTAATTGTT	C	rs111848146	7.63249	2.33e-08	0.2916	0.0127	0.0019	0.0124	0.0027	4.316e-06	0.0139	0.0025	2.046e-08	-0.40939	0.682253	not_sig	0.2902	not_sig
TC	12	89885473	T	C	rs876554	7.50165	3.15e-08	0.4945	0.0081	0.0012	0.0091	0.0015	2.477e-09	0.0072	0.0017	2.67e-05	0.844478	0.398402	not_sig	0.6579	not_sig
LDL	12	89921860	A	T	rs12306780	10.6331	2.33e-11	0.3203	0.0101	0.0014	0.009	0.0018	3.776e-07	0.012	0.002	2.33e-09	-1.1229	0.261482	not_sig	0.06922	not_sig
LDL	12	92802078	T	C	rs4760388	8.56963	2.69e-09	0.5438	0.0093	0.0013	0.007	0.0017	3.008e-05	0.0123	0.0019	1.211e-10	-2.09365	0.0362908	not_sig	0.0205	not_sig
TC	12	92819139	A	C	rs1515563	7.44376	3.6e-08	0.5415	0.0084	0.0012	0.0063	0.0016	0.0001011	0.0111	0.0018	7.238e-10	-2.00838	0.0446026	not_sig	0.0275	not_sig
LDL	12	100836797	T	C	rs1536464	17.602	2.5e-18	0.4614	-0.012	0.0013	-0.0097	0.0017	8.398e-09	-0.0138	0.0019	7.472e-13	1.61962	0.105314	not_sig	0.4388	not_sig
nonHDL	12	100836797	T	C	rs1536464	11.578	2.64e-12	0.4534	-0.012	0.0015	-0.0117	0.0022	7.311e-08	-0.0125	0.002	5.875e-10	0.270219	0.786991	not_sig	0.6787	not_sig
TC	12	100836797	T	C	rs1536464	16.6851	2.06e-17	0.4584	-0.012	0.0012	-0.0098	0.0016	4.354e-10	-0.0137	0.0018	6.125e-15	1.63181	0.102719	not_sig	0.4067	not_sig
HDL	12	101867997	A	G	rs10860738	11.6206	2.4e-12	0.3559	-0.011	0.0013	-0.0104	0.0017	9.774e-10	-0.0118	0.0019	1.302e-09	0.553674	0.579802	not_sig	0.7377	not_sig
LDL	12	102806305	T	C	rs4764883	11.9978	1.01e-12	0.3214	0.0108	0.0014	0.0106	0.0018	4.087e-09	0.0111	0.002	5.924e-08	-0.187149	0.851544	not_sig	0.9776	not_sig
TC	12	102806305	T	C	rs4764883	7.72926	1.87e-08	0.328	0.0087	0.0013	0.0094	0.0017	2.131e-08	0.0079	0.0019	2.285e-05	0.592866	0.553271	not_sig	0.3891	not_sig
LDL	12	105606068	C	G	rs1196760	12.3145	4.85e-13	0.0893	0.0192	0.0024	0.0189	0.0031	1.294e-09	0.0204	0.0035	6.25e-09	-0.323108	0.746613	not_sig	0.7226	not_sig
nonHDL	12	105606068	C	G	rs1196760	9.49949	3.17e-10	0.0913	0.0206	0.0028	0.0216	0.0042	1.853e-07	0.0178	0.0038	2.256e-06	0.67378	0.500451	not_sig	0.3641	not_sig
TC	12	105606068	C	G	rs1196760	12.0354	9.22e-13	0.0894	0.0185	0.0023	0.0178	0.003	4.806e-09	0.0194	0.0034	7.405e-09	-0.35557	0.722163	not_sig	0.6379	not_sig
HDL	12	107100717	T	C	rs4964188	8.8865	1.3e-09	0.5225	-0.01	0.0013	-0.006	0.0017	0.0003382	-0.0141	0.0018	2.101e-14	3.29879	0.000971041	not_sig	0.01777	not_sig
logTG	12	107199142	A	G	rs11113118	22.7746	1.68e-23	0.7533	-0.016	0.0014	-0.0119	0.0019	1.447e-10	-0.0216	0.0021	2.62e-24	3.44541	0.000570195	not_sig	0.009863	not_sig
HDL	12	109057037	A	T	rs11114023	11.2157	6.08e-12	0.3043	-0.011	0.0014	-0.0092	0.0018	4.828e-07	-0.0144	0.0021	6.682e-12	1.89555	0.0580197	not_sig	0.3809	not_sig
logTG	12	109100503	T	C	rs4964736	8.7572	1.75e-09	0.6487	-0.009	0.0013	-0.0068	0.0017	9.097e-05	-0.0117	0.002	2.161e-09	1.87768	0.0604248	not_sig	0.1041	not_sig
TC	12	109152649	T	C	rs4964275	12.104	7.87e-13	0.6981	-0.011	0.0013	-0.0066	0.0017	8.093e-05	-0.0165	0.0019	4.656e-19	3.91291	9.11889e-05	sig	8.663e-05	sig
nonHDL	12	109156737	T	C	rs4964750	17.1539	7.02e-18	0.3044	0.0151	0.0016	0.0098	0.0024	3.515e-05	0.0201	0.0022	2.231e-20	-3.17715	0.00148728	not_sig	0.0006946	not_sig
LDL	12	109171697	A	T	rs4964756	17.0823	8.27e-18	0.6842	-0.013	0.0014	-0.0086	0.0018	1.278e-06	-0.0187	0.002	6.29e-21	3.78042	0.000156566	not_sig	0.0004646	not_sig
logTG	12	109709680	T	G	rs12316300	23.009	9.79e-24	0.7969	0.0174	0.0016	0.0155	0.002	1.535e-14	0.02	0.0023	3.913e-18	-1.48508	0.137524	not_sig	0.09125	not_sig
nonHDL	12	109876128	T	C	rs10850141	9.60003	2.51e-10	0.6905	-0.011	0.0016	-0.0125	0.0023	4.341e-08	-0.0117	0.0021	3.027e-08	-0.257963	0.796435	not_sig	0.715	not_sig
HDL	12	109920071	T	G	rs1543896	101.536	2.91e-102	0.4814	-0.029	0.0012	-0.0261	0.0016	4.966e-60	-0.0316	0.0018	2.439e-67	2.30265	0.0212983	not_sig	0.141	not_sig
TC	12	109998097	A	G	rs7953014	46.0239	9.46e-47	0.5163	0.0182	0.0012	0.0162	0.0015	6.412e-26	0.0217	0.0017	1.111e-35	-2.44454	0.0145036	not_sig	0.2183	not_sig
LDL	12	110000193	T	C	rs7134594	8.14319	7.19e-09	0.4762	-0.008	0.0013	-0.0063	0.0016	0.0001199	-0.0094	0.0019	5.128e-07	1.25684	0.208813	not_sig	0.871	not_sig
HDL	12	111344621	T	G	rs75295329	27.3397	4.57e-28	0.8754	0.0651	0.0064	0.1349	0.0079	1.804e-65	0.0155	0.009	0.08668	10.0528	8.9249e-24	sig	0.0209	not_sig
logTG	12	111702646	A	G	rs2339718	12.3036	4.97e-13	0.3048	-0.011	0.0014	-0.0107	0.0018	2.654e-09	-0.0125	0.0021	1.426e-09	0.654607	0.512721	not_sig	0.5601	not_sig
HDL	12	111884608	T	C	rs3184504	50.1563	6.98e-51	0.5475	0.0221	0.0013	0.0225	0.0017	4.619e-38	0.0238	0.002	1.38e-32	-0.499334	0.617544	not_sig	0.8423	not_sig
LDL	12	112007756	T	C	rs653178	60.1918	6.43e-61	0.453	-0.024	0.0013	-0.027	0.0017	1.885e-54	-0.0198	0.002	4.007e-23	-2.7624	0.00573777	not_sig	0.001114	not_sig
nonHDL	12	112007756	T	C	rs653178	29.9703	1.07e-30	0.4543	-0.02	0.0016	-0.0257	0.0024	2.037e-27	-0.0168	0.0022	6.567e-15	-2.74531	0.0060454	not_sig	0.006372	not_sig
TC	12	112007756	T	C	rs653178	83.0245	9.45e-84	0.4535	-0.027	0.0013	-0.0305	0.0017	2.552e-72	-0.024	0.0019	3.131e-36	-2.56909	0.0101967	not_sig	0.0009282	not_sig
LDL	12	113218868	A	G	rs11066412	16.2163	6.08e-17	0.7394	0.0145	0.0016	0.0155	0.002	1.506e-14	0.0134	0.0023	4.063e-09	0.693883	0.487756	not_sig	0.4618	not_sig
TC	12	113218868	A	G	rs11066412	15.383	4.14e-16	0.74	0.014	0.0015	0.0149	0.002	2.466e-14	0.0135	0.0022	5.434e-10	0.474492	0.635149	not_sig	0.5655	not_sig
HDL	12	113409176	A	G	rs2072134	19.842	1.44e-20	0.8576	0.0636	0.0061	0.1024	0.0087	4.815e-32	0.0292	0.0077	0.0001407	6.35265	2.11642e-10	sig	0.0005459	not_sig
TC	12	120859188	T	G	rs2516079	13.4133	3.86e-14	0.3271	0.0105	0.0013	0.0096	0.0017	4.35e-08	0.012	0.002	9.319e-10	-0.921298	0.356895	not_sig	0.7007	not_sig
HDL	12	121406293	A	G	rs2393792	22.9432	1.14e-23	0.5269	0.0144	0.0012	0.0163	0.0016	1.98e-24	0.0138	0.0018	5.415e-14	1.04666	0.295256	not_sig	0.03151	not_sig
LDL	12	121416650	A	C	rs1169288	129.227	5.93e-130	0.3243	0.0344	0.0014	0.029	0.0018	6.839e-60	0.0432	0.002	7.77e-102	-5.31504	1.06633e-07	sig	2.311e-06	sig
TC	12	121416650	A	C	rs1169288	135.595	2.54e-136	0.3241	0.0346	0.0013	0.0296	0.0017	2.649e-65	0.042	0.0019	1.78e-104	-4.90102	9.53384e-07	sig	8.549e-06	sig
nonHDL	12	121416988	A	G	rs2244608	74.8474	1.42e-75	0.3389	0.0304	0.0016	0.0241	0.0022	3.177e-27	0.0367	0.0021	3.261e-69	-4.16063	3.17375e-05	sig	2.921e-05	sig
TC	12	122370206	T	C	rs1667583	7.46635	3.42e-08	0.8641	-0.011	0.0018	-0.0129	0.0024	5.394e-08	-0.0101	0.0026	0.0001264	-0.797421	0.425207	not_sig	0.4879	not_sig
LDL	12	122380274	A	G	rs2247139	7.55062	2.81e-08	0.864	-0.012	0.0018	-0.0122	0.0024	4.021e-07	-0.0122	0.0027	7.676e-06	0	1	not_sig	0.7141	not_sig
HDL	12	122381427	A	C	rs189392453	8.28003	5.25e-09	0.9385	0.0182	0.003	0.0176	0.0039	5.826e-06	0.0235	0.0043	3.545e-08	-1.02477	0.305473	not_sig	0.2919	not_sig
HDL	12	122963550	T	C	rs12369179	30.6223	2.39e-31	0.9193	0.0298	0.0024	0.0225	0.0031	7.879e-13	0.0447	0.0036	3.859e-36	-4.71142	2.45992e-06	sig	1.504e-06	sig
logTG	12	123203258	T	G	rs488635	18.3481	4.49e-19	0.2476	-0.015	0.0015	-0.0079	0.0019	4.695e-05	-0.025	0.0022	7.49e-30	5.91711	3.27653e-09	sig	7.441e-10	sig
HDL	12	123804721	C	G	rs12366872	86.6196	2.4e-87	0.8682	-0.042	0.0019	-0.0468	0.0025	2.953e-78	-0.0359	0.0028	2.414e-37	-2.92788	0.00341284	not_sig	5.943e-05	sig
nonHDL	12	123825339	A	G	rs7312145	9.4762	3.34e-10	0.8582	-0.017	0.0023	-0.0203	0.0033	4.293e-10	-0.0151	0.0031	8.517e-07	-1.15341	0.248742	not_sig	0.1062	not_sig
TC	12	123825339	A	G	rs7312145	51.0715	8.48e-52	0.8651	-0.031	0.0019	-0.0326	0.0024	2.421e-42	-0.0282	0.0027	6.965e-26	-1.22735	0.219693	not_sig	0.1185	not_sig
LDL	12	123856974	A	G	rs28461471	17.3232	4.75e-18	0.1274	0.021	0.0021	0.0225	0.0027	2.439e-16	0.0194	0.0033	3.936e-09	0.732163	0.464069	not_sig	0.2155	not_sig
logTG	12	123895906	C	G	rs28577594	9.49863	3.17e-10	0.3202	-0.009	0.0014	-0.0058	0.0018	0.001661	-0.0143	0.0021	9.69e-12	3.0912	0.0019935	not_sig	0.0002966	not_sig
HDL	12	124409502	A	G	rs7133378	100.166	6.83e-101	0.6709	-0.03	0.0013	-0.0249	0.0018	1.196e-45	-0.0385	0.002	7.304e-82	5.0963	3.46361e-07	sig	0.0005704	not_sig
nonHDL	12	124409502	A	G	rs7133378	20.1999	6.31e-21	0.6859	0.0167	0.0016	0.0058	0.0024	0.01493	0.0264	0.0022	8.119e-34	-6.35431	2.09364e-10	sig	3.436e-09	sig
logTG	12	124492610	T	G	rs12303671	61.518	3.03e-62	0.3426	-0.023	0.0013	-0.0157	0.0017	1.516e-19	-0.0341	0.002	4.653e-65	7.05089	1.77783e-12	sig	3.77e-08	sig
LDL	12	124560456	T	G	rs1716393	10.6275	2.36e-11	0.4116	-0.009	0.0013	-0.0068	0.0017	4.199e-05	-0.0137	0.0019	5.775e-13	2.7257	0.00641652	not_sig	0.04156	not_sig
TC	12	125265201	A	G	rs921919	35.4992	3.17e-36	0.3816	0.0187	0.0013	0.017	0.0017	1.418e-22	0.0205	0.002	8.9e-26	-1.34356	0.179091	not_sig	0.1463	not_sig
LDL	12	125312425	C	G	rs10846744	29.6274	2.36e-30	0.7497	-0.02	0.0017	-0.0167	0.0022	1.023e-14	-0.0256	0.0025	9.585e-24	2.69156	0.0071119	not_sig	0.2623	not_sig
logTG	12	125312425	C	G	rs10846744	23.6599	2.19e-24	0.7501	-0.019	0.0017	-0.0198	0.0021	1.045e-20	-0.018	0.0025	6.688e-13	-0.554529	0.579217	not_sig	0.4874	not_sig
nonHDL	12	125312425	C	G	rs10846744	38.9433	1.14e-39	0.7499	-0.028	0.002	-0.0272	0.0028	2.201e-22	-0.029	0.0026	4.407e-28	0.473099	0.636142	not_sig	0.2612	not_sig
HDL	12	125325010	C	G	rs61941677	172.174	6.71e-173	0.125	-0.059	0.002	-0.0526	0.0027	2.299e-85	-0.0676	0.003	7.77e-116	3.74728	0.000178764	not_sig	0.0217	not_sig
LDL	12	133065832	A	G	rs73486469	13.0734	8.44e-14	0.1354	0.0158	0.002	0.0141	0.0025	2.349e-08	0.0181	0.003	8.57e-10	-1.03152	0.302296	not_sig	0.3598	not_sig
TC	12	133065832	A	G	rs73486469	18.2813	5.23e-19	0.1357	0.0183	0.0019	0.0167	0.0025	1.109e-11	0.0208	0.0028	1.814e-13	-1.10065	0.271049	not_sig	0.2873	not_sig
nonHDL	12	133140329	C	G	rs78644250	13.1679	6.79e-14	0.1729	0.0204	0.0025	0.0174	0.0037	3.297e-06	0.022	0.0035	1.988e-10	-0.90705	0.36438	not_sig	0.1535	not_sig
logTG	13	23908034	A	G	rs2737700	13.9976	1.01e-14	0.4295	-0.011	0.0013	-0.0093	0.0016	1.223e-08	-0.0143	0.0019	1.457e-14	2.02469	0.042899	not_sig	0.05523	not_sig
TC	13	28604007	T	C	rs76428106	11.3233	4.75e-12	0.0115	-0.053	0.0065	-0.0574	0.0089	8.641e-11	-0.0468	0.0091	2.358e-07	-0.839196	0.401359	not_sig	0.5921	not_sig
HDL	13	28687084	T	C	rs4397962	14.4933	3.21e-15	0.2745	-0.013	0.0014	-0.0099	0.0018	5.119e-08	-0.0153	0.0021	3.136e-13	1.96846	0.0490157	not_sig	0.2532	not_sig
logTG	13	29145323	A	C	rs1340819	10.065	8.61e-11	0.3239	-0.009	0.0013	-0.0075	0.0017	1.522e-05	-0.0122	0.002	5.587e-10	1.80104	0.0716964	not_sig	0.1611	not_sig
logTG	13	31001091	A	AT	rs398098735	12.9218	1.2e-13	0.6235	0.0111	0.0014	0.0109	0.0017	4.893e-10	0.0119	0.0021	1.082e-08	-0.372264	0.709696	not_sig	0.9861	not_sig
TC	13	31005142	T	C	rs4769036	9.56939	2.7e-10	0.6145	0.0087	0.0012	0.0083	0.0016	1.202e-07	0.0092	0.0018	2.357e-07	-0.376572	0.706492	not_sig	0.9714	not_sig
nonHDL	13	31010795	A	C	rs5026917	12.0864	8.2e-13	0.3895	-0.013	0.0015	-0.0126	0.0022	1.704e-08	-0.0131	0.0021	1.995e-10	0.165104	0.868862	not_sig	0.5321	not_sig
TC	13	32444439	T	C	rs12868611	10.3387	4.58e-11	0.3274	-0.01	0.0013	-0.0104	0.0016	1.07e-10	-0.01	0.0018	3.308e-08	-0.167365	0.867083	not_sig	0.4362	not_sig
LDL	13	32445660	T	C	rs7997102	9.48836	3.25e-10	0.3226	-0.01	0.0013	-0.0097	0.0017	2.034e-08	-0.0099	0.002	5.37e-07	0.0767334	0.938836	not_sig	0.4606	not_sig
LDL	13	32976656	G	GC	rs368213791	61.6939	2.02e-62	0.5306	0.0244	0.0014	0.0245	0.0017	1.485e-44	0.0242	0.0021	6.712e-31	0.111814	0.910971	not_sig	0.1037	not_sig
nonHDL	13	32976656	G	GC	rs368213791	51.468	3.4e-52	0.5261	0.026	0.0016	0.0281	0.0023	2.066e-35	0.0246	0.0021	1.134e-30	1.12859	0.259071	not_sig	0.416	not_sig
TC	13	32976656	G	GC	rs368213791	47.8222	1.51e-48	0.5295	0.0208	0.0013	0.0205	0.0016	5.131e-36	0.0221	0.002	1.659e-29	-0.629403	0.529086	not_sig	0.3158	not_sig
HDL	13	41635301	C	G	rs17532371	16.3358	4.62e-17	0.0679	-0.024	0.0026	-0.0209	0.0034	5.292e-10	-0.0255	0.0038	2.414e-11	0.909607	0.36303	not_sig	0.7914	not_sig
LDL	13	41635301	C	G	rs17532371	10.1393	7.26e-11	0.0681	-0.02	0.0026	-0.0183	0.0034	5.698e-08	-0.0235	0.0038	8.765e-10	1.02708	0.304385	not_sig	0.3871	not_sig
TC	13	41635301	C	G	rs17532371	21.6296	2.35e-22	0.0681	-0.028	0.0025	-0.0238	0.0033	4.618e-13	-0.0322	0.0037	1.9e-18	1.7073	0.0877669	not_sig	0.1599	not_sig
HDL	13	45492138	T	G	rs73179655	8.15506	7e-09	0.9704	-0.025	0.0039	-0.0226	0.0052	1.346e-05	-0.0272	0.0058	2.774e-06	0.595414	0.551567	not_sig	0.656	not_sig
logTG	13	45970147	A	G	rs138358301	7.84188	1.44e-08	0.0044	0.0686	0.0102	0.0721	0.0129	2.007e-08	0.0756	0.0155	1.09e-06	-0.174574	0.861415	not_sig	0.7332	not_sig
TC	13	50048401	CA	C	rs11386165	9.81171	1.54e-10	0.8584	-0.013	0.002	-0.0106	0.0024	1.337e-05	-0.0139	0.0028	1.119e-06	0.90167	0.367232	not_sig	0.7582	not_sig
LDL	13	50104386	A	G	rs9535255	8.35066	4.46e-09	0.5091	-0.008	0.0013	-0.0078	0.0016	1.741e-06	-0.0087	0.0019	2.885e-06	0.364888	0.715195	not_sig	0.8948	not_sig
logTG	13	50655989	T	G	rs41284816	19.6717	2.13e-20	0.9792	0.0502	0.0048	0.0469	0.0063	1.022e-13	0.054	0.0069	7.48e-15	-0.764381	0.44464	not_sig	0.8971	not_sig
nonHDL	13	50655989	T	G	rs41284816	10.8308	1.48e-11	0.9795	0.0431	0.0057	0.0361	0.0086	2.703e-05	0.0476	0.0076	4.057e-10	-1.00628	0.314281	not_sig	0.7595	not_sig
HDL	13	50707087	C	G	rs2812208	7.67985	2.09e-08	0.9778	-0.032	0.0046	-0.0316	0.0062	3.173e-07	-0.0316	0.0067	2.464e-06	0	1	not_sig	0.9108	not_sig
TC	13	51151633	A	G	rs1239707	9.20608	6.22e-10	0.4066	-0.009	0.0012	-0.0096	0.0016	7.995e-10	-0.0087	0.0018	6.318e-07	-0.376572	0.706492	not_sig	0.1847	not_sig
logTG	13	51172963	A	G	rs558003	11.1189	7.6e-12	0.8886	0.0165	0.0021	0.0137	0.0027	3.104e-07	0.0206	0.003	8.074e-12	-1.71966	0.0854936	not_sig	0.1619	not_sig
HDL	13	51214613	A	G	rs797482	14.6149	2.43e-15	0.8707	-0.017	0.0018	-0.0165	0.0024	3.265e-12	-0.0165	0.0027	1.164e-09	0	1	not_sig	0.9876	not_sig
HDL	13	58391491	T	C	rs12428841	8.98663	1.03e-09	0.2659	-0.01	0.0014	-0.01	0.0019	1.092e-07	-0.0102	0.0021	1.686e-06	0.0712082	0.943232	not_sig	0.8026	not_sig
LDL	13	74748606	A	G	rs4885160	9.02468	9.45e-10	0.4834	-0.01	0.0013	-0.0111	0.0017	1.604e-10	-0.0077	0.002	8.738e-05	-1.30447	0.192074	not_sig	0.08131	not_sig
nonHDL	13	74748606	A	G	rs4885160	7.9129	1.22e-08	0.466	-0.011	0.0015	-0.0128	0.0022	5.712e-09	-0.0083	0.0021	5.3e-05	-1.48594	0.137295	not_sig	0.2885	not_sig
TC	13	74748606	A	G	rs4885160	15.7021	1.99e-16	0.477	-0.012	0.0013	-0.0122	0.0016	1.063e-13	-0.0106	0.0018	1.043e-08	-0.669461	0.503201	not_sig	0.3936	not_sig
LDL	13	95226210	C	G	rs7322453	14.6637	2.17e-15	0.7117	-0.013	0.0015	-0.0118	0.0019	4.823e-10	-0.0157	0.0022	8.682e-13	1.35116	0.176643	not_sig	0.9549	not_sig
logTG	13	95258944	T	C	rs6492721	34.9231	1.19e-35	0.6456	-0.018	0.0013	-0.0197	0.0017	2.846e-30	-0.0148	0.002	4.088e-14	-1.87768	0.0604248	not_sig	0.1674	not_sig
HDL	13	108960380	T	TGCTG	rs200748895	11.6717	2.13e-12	0.9807	0.0435	0.0053	0.0363	0.0066	4.602e-08	0.0554	0.0084	5.143e-11	-1.80241	0.0714803	not_sig	0.5425	not_sig
TC	13	110411642	A	C	rs754205	7.50704	3.11e-08	0.405	0.0079	0.0012	0.0072	0.0016	4.266e-06	0.0092	0.0018	1.408e-07	-0.836826	0.40269	not_sig	0.5241	not_sig
nonHDL	13	111033821	A	C	rs9521732	20.8282	1.49e-21	0.6025	0.0161	0.0015	0.0173	0.0022	6.865e-15	0.0146	0.002	7.617e-13	0.911991	0.361774	not_sig	0.4052	not_sig
TC	13	111033821	A	C	rs9521732	24.6164	2.42e-25	0.5999	0.0142	0.0012	0.0155	0.0016	3.551e-22	0.0127	0.0018	2.7e-12	1.17156	0.241375	not_sig	0.1621	not_sig
logTG	13	111038379	T	C	rs75345389	7.70342	1.98e-08	0.2616	-0.01	0.0015	-0.0108	0.0019	3.333e-08	-0.0106	0.0023	2.689e-06	-0.0674307	0.946239	not_sig	0.6616	not_sig
LDL	13	111039070	A	G	rs4771674	25.7005	1.99e-26	0.5939	0.0151	0.0013	0.0158	0.0017	2.083e-20	0.0151	0.0019	7.17e-15	0.27652	0.782148	not_sig	0.39	not_sig
HDL	13	113927208	T	G	rs9604045	17.2593	5.5e-18	0.7258	-0.016	0.0017	-0.0159	0.0021	3.798e-14	-0.0161	0.0025	1.167e-10	0.0617593	0.950755	not_sig	0.6449	not_sig
TC	13	113927208	T	G	rs9604045	12.6535	2.22e-13	0.7276	-0.014	0.0016	-0.0108	0.0021	1.54e-07	-0.0176	0.0024	2.653e-13	2.14863	0.0316639	not_sig	0.01689	not_sig
LDL	13	114551993	T	C	rs6602909	48.7947	1.6e-49	0.3578	0.0216	0.0014	0.0192	0.0018	8.883e-28	0.0244	0.002	2.439e-33	-1.94635	0.0516123	not_sig	0.2353	not_sig
logTG	13	114551993	T	C	rs6602909	70.7768	1.67e-71	0.3575	0.0256	0.0013	0.0256	0.0017	2.502e-49	0.0251	0.002	4.115e-36	0.1916	0.848055	not_sig	0.04997	not_sig
nonHDL	13	114551993	T	C	rs6602909	65.919	1.21e-66	0.3409	0.0296	0.0016	0.0287	0.0023	4.27e-36	0.0304	0.0021	1.037e-45	-0.548172	0.583574	not_sig	0.3798	not_sig
TC	13	114551993	T	C	rs6602909	80.424	3.77e-81	0.3548	0.0264	0.0013	0.0243	0.0016	1.191e-49	0.028	0.0019	7.054e-51	-1.5009	0.133381	not_sig	0.3303	not_sig
LDL	14	21492229	A	G	rs1998848	7.85178	1.41e-08	0.9783	0.0375	0.0053	0.0315	0.0072	1.123e-05	0.0426	0.0079	7.343e-08	-1.04589	0.295611	not_sig	0.3614	not_sig
TC	14	21492229	A	G	rs1998848	10.1428	7.2e-11	0.9615	0.0364	0.0046	0.0281	0.0058	1.202e-06	0.0438	0.0066	2.582e-11	-1.80055	0.0717735	not_sig	0.1337	not_sig
logTG	14	23685442	A	G	rs34210072	8.73137	1.86e-09	0.8245	0.0107	0.0017	0.0097	0.0022	7.477e-06	0.0134	0.0025	6.913e-08	-1.11759	0.26374	not_sig	0.2163	not_sig
logTG	14	24560159	A	G	rs79873985	7.84487	1.43e-08	0.0142	-0.037	0.0058	-0.0289	0.0075	0.0001086	-0.0443	0.0085	1.627e-07	1.36653	0.171774	not_sig	0.4172	not_sig
LDL	14	24871926	T	C	rs11621792	54.2505	5.62e-55	0.5736	-0.022	0.0013	-0.0186	0.0017	7.728e-27	-0.0284	0.002	3.702e-45	3.75994	0.000169956	not_sig	0.02982	not_sig
TC	14	24871926	T	C	rs11621792	51.9679	1.08e-52	0.5773	-0.021	0.0013	-0.0192	0.0017	1.798e-30	-0.0247	0.0019	5.539e-38	2.17384	0.0297171	not_sig	0.333	not_sig
nonHDL	14	24872209	T	C	rs6573778	40.5895	2.57e-41	0.5419	-0.023	0.0016	-0.0194	0.0023	2.002e-17	-0.0264	0.0021	4.402e-35	2.25718	0.023997	not_sig	0.02463	not_sig
nonHDL	14	31725111	A	G	rs139262716	15.272	5.35e-16	0.898	0.0369	0.0041	0.0382	0.0053	4.239e-13	0.0325	0.0052	5.76e-10	0.770977	0.44072	not_sig	0.3628	not_sig
TC	14	31727404	G	GT	rs138804630	14.4523	3.53e-15	0.1115	-0.031	0.0035	-0.0321	0.0042	2.169e-14	-0.0271	0.0046	3.725e-09	-0.808878	0.418586	not_sig	0.4044	not_sig
LDL	14	31735087	T	G	rs11845699	12.1012	7.92e-13	0.8147	0.0196	0.0029	0.0177	0.0038	3.44e-06	0.0231	0.0046	5.154e-07	-0.911418	0.362075	not_sig	0.4499	not_sig
HDL	14	33175822	A	G	rs1955512	8.80878	1.55e-09	0.4145	-0.01	0.0013	-0.0097	0.0017	2.125e-08	-0.0095	0.0019	1.128e-06	-0.0790963	0.936956	not_sig	0.4867	not_sig
LDL	14	35186694	T	C	rs11846704	13.5603	2.75e-14	0.6896	0.0112	0.0014	0.0104	0.0018	1.167e-08	0.0132	0.0021	3.864e-10	-1.01952	0.307956	not_sig	0.607	not_sig
nonHDL	14	35186694	T	C	rs11846704	9.12329	7.53e-10	0.6793	0.0117	0.0017	0.0127	0.0024	1.616e-07	0.0115	0.0022	2.827e-07	0.370154	0.711268	not_sig	0.5496	not_sig
TC	14	35186694	T	C	rs11846704	10.8713	1.34e-11	0.676	0.0094	0.0013	0.0084	0.0017	1.106e-06	0.0115	0.002	7.98e-09	-1.19001	0.234042	not_sig	0.7694	not_sig
logTG	14	38848824	A	T	rs1168548	9.38782	4.09e-10	0.6596	0.0068	0.0014	0.0084	0.0018	4.456e-06	0.0058	0.0021	0.005039	0.945543	0.344382	not_sig	0.4335	not_sig
TC	14	39766074	T	C	rs62000665	11.0812	8.3e-12	0.8048	-0.012	0.0015	-0.0109	0.0019	1.768e-08	-0.013	0.0022	2.796e-09	0.727943	0.466648	not_sig	0.7615	not_sig
logTG	14	50655357	C	G	rs72681869	8.40041	3.98e-09	0.9916	0.053	0.0076	0.0553	0.0099	2.381e-08	0.053	0.011	1.599e-06	0.156333	0.875771	not_sig	0.9217	not_sig
logTG	14	52470889	A	G	rs1151574	8.2184	6.05e-09	0.1489	0.011	0.0018	0.01	0.0024	2.965e-05	0.0115	0.0027	2.155e-05	-0.417674	0.676186	not_sig	0.4826	not_sig
HDL	14	52493161	T	C	rs17124920	7.56355	2.73e-08	0.2495	-0.004	0.0014	-0.0036	0.0018	0.05393	-0.0034	0.0021	0.1041	-0.0729057	0.941881	not_sig	0.8912	not_sig
logTG	14	60749118	C	G	rs7154773	10.6191	2.4e-11	0.6308	-0.009	0.0013	-0.0093	0.0017	5.431e-08	-0.008	0.002	4.49e-05	-0.49816	0.618371	not_sig	0.2665	not_sig
LDL	14	64233980	T	C	rs8012828	15.8059	1.56e-16	0.8396	-0.015	0.0017	-0.013	0.0022	4.919e-09	-0.0176	0.0026	8.607e-12	1.36016	0.173779	not_sig	0.05418	not_sig
TC	14	64236157	A	G	rs35372182	20.99	1.02e-21	0.1853	0.0166	0.0016	0.0156	0.002	2.36e-14	0.0178	0.0024	8.738e-14	-0.709553	0.477981	not_sig	0.4174	not_sig
nonHDL	14	64239351	T	C	rs12897637	14.3501	4.47e-15	0.1584	0.0179	0.0021	0.0165	0.003	3.234e-08	0.0179	0.0027	5.73e-11	-0.348352	0.727576	not_sig	0.4855	not_sig
logTG	14	64239629	T	G	rs12878001	23.2696	5.38e-24	0.1876	0.018	0.0017	0.0171	0.0021	6.866e-16	0.02	0.0025	1.74e-15	-0.893408	0.371639	not_sig	0.9095	not_sig
HDL	14	65870594	T	G	rs2185454	9.68484	2.07e-10	0.32	-0.01	0.0013	-0.0086	0.0017	6.015e-07	-0.0118	0.002	2.035e-09	1.22913	0.219023	not_sig	0.3505	not_sig
HDL	14	69149372	A	G	rs72729582	13.4129	3.86e-14	0.0783	0.0202	0.0023	0.0156	0.003	3.037e-07	0.0277	0.0034	5.402e-16	-2.69061	0.00713215	not_sig	0.01986	not_sig
logTG	14	69285264	A	G	rs4899263	8.48105	3.3e-09	0.4684	-0.009	0.0013	-0.0085	0.0016	2.572e-07	-0.0082	0.0019	1.006e-05	-0.121482	0.90331	not_sig	0.7239	not_sig
HDL	14	70833819	C	G	rs1044527	11.2082	6.19e-12	0.4422	-0.01	0.0012	-0.0109	0.0016	1.489e-11	-0.01	0.0018	4.914e-08	-0.376798	0.706324	not_sig	0.9341	not_sig
nonHDL	14	70846954	T	C	rs7157399	19.612	2.44e-20	0.8668	0.0217	0.0022	0.0235	0.0031	3.761e-14	0.0185	0.0029	1.486e-10	1.1829	0.236847	not_sig	0.166	not_sig
TC	14	70847103	A	G	rs8022128	19.3399	4.57e-20	0.8668	0.0179	0.0018	0.0199	0.0023	1.056e-18	0.0152	0.0025	1.806e-09	1.3942	0.163256	not_sig	0.044	not_sig
LDL	14	70857022	T	C	rs6573960	34.1515	7.06e-35	0.1346	-0.025	0.0019	-0.0282	0.0024	1.47e-31	-0.0214	0.0027	7.868e-15	-1.89578	0.0579897	not_sig	0.007797	not_sig
HDL	14	74250126	T	C	rs13379043	27.847	1.42e-28	0.3022	0.0169	0.0014	0.0143	0.0018	4.226e-15	0.0219	0.0021	6.544e-25	-2.77042	0.00559844	not_sig	0.01026	not_sig
LDL	14	74250126	T	C	rs13379043	25.2662	5.42e-26	0.3023	-0.016	0.0014	-0.0156	0.0018	1.225e-17	-0.019	0.0021	5.85e-19	1.23799	0.215721	not_sig	0.3123	not_sig
nonHDL	14	74250126	T	C	rs13379043	19.3047	4.96e-20	0.2782	-0.017	0.0017	-0.0176	0.0025	1.206e-12	-0.0187	0.0023	6.622e-16	0.325195	0.745033	not_sig	0.8928	not_sig
TC	14	74250126	T	C	rs13379043	9.06903	8.53e-10	0.3014	-0.01	0.0014	-0.0106	0.0018	2.854e-09	-0.0096	0.002	3.06e-06	-0.374502	0.708031	not_sig	0.3978	not_sig
TC	14	75293374	A	G	rs11159104	16.0878	8.17e-17	0.453	-0.012	0.0012	-0.0122	0.0016	8.934e-14	-0.0121	0.0018	2.569e-11	-0.0418413	0.966625	not_sig	0.6992	not_sig
HDL	14	75299101	A	G	rs7150254	8.2991	5.02e-09	0.5461	0.0088	0.0013	0.0066	0.0016	4.778e-05	0.0126	0.0018	7.234e-12	-2.51199	0.0120053	not_sig	0.09024	not_sig
nonHDL	14	75326771	T	C	rs2359239	11.4763	3.34e-12	0.6134	-0.012	0.0015	-0.0131	0.0022	1.467e-09	-0.0108	0.002	7.444e-08	-0.776881	0.437229	not_sig	0.6629	not_sig
LDL	14	75327443	T	C	rs722599	9.55737	2.77e-10	0.4011	0.0091	0.0013	0.0092	0.0017	3.163e-08	0.0106	0.0019	2.968e-08	-0.553041	0.580236	not_sig	0.8419	not_sig
HDL	14	79939993	A	G	rs17109256	8.47985	3.31e-09	0.7869	0.0109	0.0016	0.0129	0.002	2.339e-10	0.0092	0.0023	7.399e-05	1.22395	0.220971	not_sig	0.3271	not_sig
HDL	14	81701004	T	C	rs12586249	11.7713	1.69e-12	0.2495	0.0122	0.0015	0.0113	0.0019	4.157e-09	0.0132	0.0021	4.609e-10	-0.676478	0.498737	not_sig	0.8776	not_sig
HDL	14	89804507	T	C	rs7141800	15.8414	1.44e-16	0.7582	0.0144	0.0015	0.0122	0.002	6.726e-10	0.0165	0.0023	9.189e-13	-1.42243	0.154902	not_sig	0.08725	not_sig
logTG	14	89804856	A	G	rs4904550	10.3834	4.14e-11	0.2339	0.0109	0.0016	0.0078	0.002	0.0001008	0.0147	0.0023	1.791e-10	-2.27712	0.0227792	not_sig	0.03625	not_sig
nonHDL	14	90048934	T	C	rs11626777	7.76232	1.73e-08	0.581	-0.01	0.0016	-0.0049	0.0023	0.02958	-0.0153	0.0021	5.82e-13	3.35352	0.000797906	not_sig	0.0006655	not_sig
LDL	14	90058243	A	G	rs34513589	7.80253	1.58e-08	0.4345	0.0088	0.0013	0.0058	0.0017	0.0008917	0.014	0.002	1.489e-12	-3.14607	0.00165481	not_sig	0.004263	not_sig
TC	14	90058243	A	G	rs34513589	7.72838	1.87e-08	0.4422	0.0085	0.0013	0.0056	0.0017	0.0007923	0.0133	0.0019	9.409e-13	-3.04338	0.00233938	not_sig	0.007191	not_sig
HDL	14	92504973	T	TA	rs3835249	7.43779	3.65e-08	0.2603	0.0098	0.0015	0.0084	0.0019	1.403e-05	0.0112	0.0023	1.187e-06	-0.946244	0.344024	not_sig	0.5624	not_sig
LDL	14	94847262	A	T	rs17580	40.0209	9.53e-41	0.9619	-0.05	0.0035	-0.0439	0.0045	1.916e-22	-0.0582	0.0052	9.898e-29	2.09423	0.0362397	not_sig	0.001737	not_sig
nonHDL	14	94847262	A	T	rs17580	19.7181	1.91e-20	0.9625	-0.044	0.0043	-0.0356	0.0062	1.111e-08	-0.0505	0.0056	3.846e-19	1.79106	0.0732837	not_sig	0.07637	not_sig
TC	14	94847262	A	T	rs17580	37.5143	3.06e-38	0.9621	-0.048	0.0034	-0.0407	0.0044	2.083e-20	-0.0563	0.005	2.381e-29	2.36017	0.0182664	not_sig	0.0009541	not_sig
HDL	14	100359294	T	C	rs10131519	10.3983	4e-11	0.2517	-0.011	0.0015	-0.0107	0.0019	3.617e-08	-0.0108	0.0022	9.438e-07	0.0346847	0.972331	not_sig	0.7071	not_sig
logTG	14	100765823	T	C	rs61993685	10.1508	7.07e-11	0.0692	-0.02	0.0026	-0.0185	0.0034	4.62e-08	-0.0197	0.0039	3.8e-07	0.233293	0.815534	not_sig	0.6165	not_sig
HDL	14	101194561	A	G	rs10139403	8.06542	8.6e-09	0.6405	-0.01	0.0014	-0.0111	0.0018	6.782e-10	-0.0087	0.0021	3.039e-05	-0.874869	0.381645	not_sig	0.1128	not_sig
LDL	14	102622225	T	C	rs1211836	9.30948	4.9e-10	0.2581	-0.011	0.0015	-0.012	0.002	1.525e-09	-0.0093	0.0023	5.417e-05	-0.892135	0.372321	not_sig	0.1655	not_sig
TC	14	102675350	C	G	rs6575900	12.6428	2.28e-13	0.7468	0.0124	0.0015	0.0141	0.0019	1.553e-13	0.011	0.0022	4.62e-07	1.07458	0.282561	not_sig	0.141	not_sig
HDL	14	103307655	C	G	rs66970053	15.6199	2.4e-16	0.7232	0.0127	0.0015	0.0148	0.0019	3.758e-15	0.0103	0.0021	1.553e-06	1.60218	0.109115	not_sig	0.02151	not_sig
logTG	14	104293533	T	C	rs12891399	12.5187	3.03e-13	0.3244	0.0108	0.0013	0.0106	0.0017	9.459e-10	0.0126	0.002	1.553e-10	-0.766401	0.443438	not_sig	0.2645	not_sig
HDL	14	105258437	T	G	rs2494747	74.0467	8.98e-75	0.4356	0.0268	0.0014	0.0226	0.0017	9.438e-39	0.0329	0.002	2.383e-60	-3.95626	7.61308e-05	sig	2.104e-05	sig
HDL	15	23932467	A	G	rs3743340	8.66548	2.16e-09	0.4767	-0.009	0.0013	-0.0088	0.0017	1.448e-07	-0.0103	0.0019	4.937e-08	0.593222	0.553032	not_sig	0.7173	not_sig
logTG	15	31637666	T	C	rs28624578	8.44808	3.56e-09	0.1598	0.012	0.0018	0.0091	0.0023	9.179e-05	0.0142	0.0026	2.861e-08	-1.47784	0.139451	not_sig	0.5392	not_sig
HDL	15	39447529	A	G	rs275179	10.1507	7.07e-11	0.2904	0.0104	0.0016	0.0077	0.002	0.0001647	0.0136	0.0023	3.986e-09	-1.9517	0.0509732	not_sig	0.1876	not_sig
logTG	15	39447529	A	G	rs275179	12.6298	2.35e-13	0.2751	-0.013	0.0016	-0.0152	0.0021	4.873e-13	-0.0119	0.0024	6.043e-07	-1.04088	0.297932	not_sig	0.4087	not_sig
logTG	15	40400195	T	C	rs35477346	13.46	3.47e-14	0.2855	0.0115	0.0014	0.0113	0.0018	2.997e-10	0.0113	0.0021	1.044e-07	0	1	not_sig	0.8658	not_sig
TC	15	40616986	T	C	rs2289334	9.37368	4.23e-10	0.2185	-0.012	0.0019	-0.013	0.0024	5.58e-08	-0.0115	0.0027	2.072e-05	-0.418413	0.675645	not_sig	0.6021	not_sig
HDL	15	40751555	A	C	rs3803357	10.7063	1.97e-11	0.4718	-0.01	0.0013	-0.0091	0.0017	3.765e-08	-0.0118	0.0019	5.739e-10	1.0678	0.285611	not_sig	0.07913	not_sig
logTG	15	41057507	T	C	rs72735627	12.0657	8.6e-13	0.9146	0.0207	0.0025	0.0215	0.0033	9.598e-11	0.0204	0.0035	5.821e-09	0.230025	0.818072	not_sig	0.8388	not_sig
logTG	15	41880619	A	G	rs8025212	10.4889	3.24e-11	0.3161	-0.011	0.0014	-0.0085	0.0018	1.942e-06	-0.0153	0.002	9.429e-14	2.54211	0.0110185	not_sig	0.121	not_sig
HDL	15	41888918	A	G	rs7170463	15.9043	1.25e-16	0.3106	0.0132	0.0014	0.0112	0.0018	7.024e-10	0.0172	0.0021	6.459e-17	-2.18717	0.0287299	not_sig	0.1572	not_sig
HDL	15	43820717	T	C	rs55707100	115.553	2.8e-116	0.9742	0.1023	0.0042	0.0881	0.0054	1.453e-59	0.1236	0.0062	3.81e-88	-4.35337	1.34059e-05	sig	0.002551	not_sig
logTG	15	44027885	T	C	rs139974673	202.725	1.88e-203	0.0259	0.1328	0.0042	0.1095	0.0054	8.02e-92	0.163	0.0061	1.75e-157	-6.60569	3.95678e-11	sig	1.147e-05	sig
nonHDL	15	44027885	T	C	rs139974673	10.7974	1.59e-11	0.0253	0.0404	0.0051	0.0545	0.0075	2.794e-13	0.0318	0.0068	2.754e-06	2.25184	0.0243325	not_sig	0.0003038	not_sig
logTG	15	45001900	A	G	rs1901529	10.9985	1e-11	0.1164	0.0171	0.0021	0.0143	0.0028	2.971e-07	0.0217	0.0032	5.971e-12	-1.75057	0.0800205	not_sig	0.5213	not_sig
LDL	15	49336477	A	T	rs2413926	17.5951	2.54e-18	0.6483	0.0132	0.0013	0.0116	0.0018	4.644e-11	0.0156	0.002	2.282e-15	-1.4972	0.134343	not_sig	0.3169	not_sig
TC	15	49336477	A	T	rs2413926	14.8574	1.39e-15	0.6535	0.0117	0.0013	0.0109	0.0017	5.675e-11	0.0134	0.0018	4.055e-13	-1.01753	0.308902	not_sig	0.7424	not_sig
nonHDL	15	49527624	T	C	rs55979115	16.129	7.43e-17	0.3382	-0.015	0.0016	-0.0142	0.0024	1.431e-09	-0.0166	0.0022	2.279e-14	0.740308	0.459113	not_sig	0.6033	not_sig
HDL	15	50993673	T	TAAAA	rs35336805	8.34822	4.49e-09	0.7754	0.0119	0.0017	0.0124	0.0021	7.316e-09	0.0108	0.0025	1.787e-05	0.494074	0.621254	not_sig	0.5164	not_sig
HDL	15	53001538	T	C	rs2414178	8.19594	6.37e-09	0.2269	0.0095	0.0015	0.0097	0.002	8.889e-07	0.0091	0.0022	4.822e-05	0.203476	0.838763	not_sig	0.5639	not_sig
LDL	15	53096084	C	G	rs6493583	13.1186	7.61e-14	0.147	-0.014	0.0018	-0.0158	0.0024	2.004e-11	-0.0116	0.0027	1.476e-05	-1.17092	0.241631	not_sig	0.5188	not_sig
nonHDL	15	53096084	C	G	rs6493583	10.4197	3.8e-11	0.1423	-0.015	0.0021	-0.016	0.003	1.34e-07	-0.0124	0.0028	1.129e-05	-0.881025	0.378304	not_sig	0.4497	not_sig
TC	15	53096084	C	G	rs6493583	14.1219	7.55e-15	0.1477	-0.013	0.0017	-0.0161	0.0022	3.04e-13	-0.0105	0.0025	1.751e-05	-1.69448	0.0901734	not_sig	0.1688	not_sig
LDL	15	53739426	A	C	rs79391862	27.9988	1e-28	0.0199	-0.065	0.0053	-0.0782	0.0069	4.71e-30	-0.0495	0.0075	3.522e-11	-2.8363	0.00456398	not_sig	0.001257	not_sig
nonHDL	15	53739426	A	C	rs79391862	17.7969	1.6e-18	0.0229	-0.058	0.0058	-0.0854	0.0086	2.785e-23	-0.0395	0.0078	3.835e-07	-3.97027	7.17913e-05	sig	0.0002366	not_sig
TC	15	53739426	A	C	rs79391862	24.6657	2.16e-25	0.0202	-0.06	0.0051	-0.0698	0.0067	1.301e-25	-0.0479	0.0072	2.18e-11	-2.24387	0.0248409	not_sig	0.02209	not_sig
HDL	15	57254842	A	T	rs1642929	9.00261	9.94e-10	0.7402	-0.01	0.0014	-0.0117	0.0018	2.08e-10	-0.0078	0.0021	0.0001669	-1.42166	0.155124	not_sig	0.1357	not_sig
LDL	15	57297078	A	T	rs72749502	22.7973	1.59e-23	0.0704	0.0289	0.0027	0.0246	0.0035	1.614e-12	0.0356	0.0038	1.437e-20	-2.14443	0.0319981	not_sig	0.07822	not_sig
logTG	15	57297078	A	T	rs72749502	24.6156	2.42e-25	0.0704	0.029	0.0026	0.0317	0.0034	2.885e-20	0.0264	0.0038	2.906e-12	1.04554	0.295771	not_sig	0.5276	not_sig
nonHDL	15	57297078	A	T	rs72749502	29.9782	1.05e-30	0.0711	0.0382	0.003	0.0363	0.0044	7.419e-17	0.0412	0.0041	3.697e-24	-0.818236	0.413223	not_sig	0.5703	not_sig
TC	15	57297078	A	T	rs72749502	29.9901	1.02e-30	0.0694	0.0319	0.0025	0.032	0.0033	3.897e-22	0.0342	0.0036	1.996e-21	-0.45395	0.649865	not_sig	0.9655	not_sig
HDL	15	57920703	A	G	rs2433204	9.51524	3.05e-10	0.4333	0.0089	0.0012	0.0076	0.0016	2.344e-06	0.0118	0.0018	1.331e-10	-1.75839	0.078681	not_sig	0.4409	not_sig
HDL	15	58680178	T	C	rs261291	1240.62	0	0.3729	0.1004	0.0013	0.1011	0.0016	0	0.1041	0.0019	0	-1.21767	0.223348	not_sig	0.03446	not_sig
LDL	15	58722590	G	GC	rs35980001	17.8177	1.52e-18	0.2371	0.0134	0.0016	0.0155	0.002	1.805e-14	0.0098	0.0025	6.804e-05	1.79284	0.0729985	not_sig	0.0002602	not_sig
logTG	15	58723426	A	G	rs1077835	192.794	1.61e-193	0.2703	0.0451	0.0014	0.0344	0.0019	7.196e-76	0.0602	0.0022	1.69e-169	-8.92757	4.35487e-19	sig	8.164e-10	sig
nonHDL	15	58723426	A	G	rs1077835	42.629	2.35e-43	0.2635	0.0248	0.0017	0.0296	0.0024	1.753e-34	0.02	0.0023	2.459e-18	2.90034	0.00372753	not_sig	2.473e-05	sig
TC	15	58723939	A	G	rs2070895	404.632	0	0.7186	-0.062	0.0014	-0.0605	0.0017	3.06e-266	-0.0658	0.002	9.54e-243	2.03453	0.0418979	not_sig	0.5119	not_sig
HDL	15	59277019	T	C	rs112147665	50.6694	2.14e-51	0.0021	0.3018	0.0177	0.3034	0.0249	3.012e-34	0.3173	0.0254	1.019e-35	-0.394044	0.693548	not_sig	0.2658	not_sig
logTG	15	59277019	T	C	rs112147665	16.4924	3.22e-17	0.0021	0.1836	0.018	0.1436	0.025	9.512e-09	0.2174	0.0256	1.768e-17	-2.07472	0.0380128	not_sig	0.01219	not_sig
TC	15	59277019	T	C	rs112147665	13.6764	2.11e-14	0.0021	0.1596	0.0176	0.1485	0.0246	1.607e-09	0.1675	0.0251	2.323e-11	-0.544794	0.585895	not_sig	0.2395	not_sig
HDL	15	59780362	C	G	rs187359403	10.3373	4.6e-11	0.0015	0.1542	0.0201	0.1552	0.0248	3.845e-10	0.151	0.0326	3.576e-06	0.10336	0.917677	not_sig	0.2728	not_sig
HDL	15	61947280	C	G	rs12438742	12.6777	2.1e-13	0.5414	0.01	0.0013	0.0087	0.0016	8.477e-08	0.0107	0.0019	9.999e-09	-0.811782	0.416917	not_sig	0.8337	not_sig
logTG	15	61952501	A	G	rs2245899	10.7097	1.95e-11	0.5685	-0.01	0.0012	-0.0097	0.0016	1.896e-09	-0.0095	0.0018	2.386e-07	-0.0835348	0.933426	not_sig	0.6937	not_sig
HDL	15	63344167	A	G	rs55719615	25.917	1.21e-26	0.3229	-0.016	0.0014	-0.012	0.0018	1.177e-11	-0.0206	0.002	7.277e-25	3.22266	0.00127007	not_sig	0.01614	not_sig
LDL	15	63788267	T	C	rs11636087	16.1902	6.45e-17	0.2855	0.0138	0.0015	0.0125	0.0019	5.927e-11	0.0157	0.0022	5.47e-13	-1.10865	0.267583	not_sig	0.5165	not_sig
nonHDL	15	63791063	T	C	rs62011285	21.5314	2.94e-22	0.3413	0.0171	0.0017	0.0143	0.0024	2.918e-09	0.0185	0.0022	8.018e-17	-1.29554	0.195134	not_sig	0.2013	not_sig
TC	15	63791063	T	C	rs62011285	27.9287	1.18e-28	0.3383	0.0165	0.0013	0.0164	0.0018	8.87e-21	0.0165	0.002	5.913e-17	-0.0374502	0.970126	not_sig	0.5256	not_sig
logTG	15	63793238	T	G	rs11635675	57.5006	3.16e-58	0.3394	0.0235	0.0014	0.0232	0.0018	8.563e-39	0.0236	0.002	2.751e-31	-0.149536	0.881131	not_sig	0.8276	not_sig
HDL	15	63910433	T	G	rs75663391	13.7526	1.77e-14	0.3623	-0.012	0.0015	-0.0117	0.0019	3.208e-10	-0.0138	0.0023	1.168e-09	0.709683	0.477901	not_sig	0.7892	not_sig
logTG	15	66872114	T	C	rs4776793	19.6309	2.34e-20	0.6524	-0.013	0.0013	-0.0143	0.0017	1.274e-17	-0.0128	0.0019	1.787e-11	-0.591818	0.553973	not_sig	0.6544	not_sig
HDL	15	66877172	A	G	rs2469128	12.1615	6.9e-13	0.5683	-0.01	0.0013	-0.01	0.0016	1.116e-09	-0.0113	0.0019	1.678e-09	0.527659	0.597736	not_sig	0.8218	not_sig
LDL	15	67428014	A	C	rs4147358	7.51407	3.06e-08	0.7269	-0.009	0.0015	-0.0076	0.0019	4.915e-05	-0.0104	0.0022	1.893e-06	0.970066	0.332014	not_sig	0.4992	not_sig
nonHDL	15	67428014	A	C	rs4147358	9.08178	8.28e-10	0.7184	-0.012	0.0017	-0.0111	0.0024	4.519e-06	-0.0116	0.0023	3.072e-07	0.15106	0.879929	not_sig	0.9629	not_sig
TC	15	67428014	A	C	rs4147358	7.97635	1.06e-08	0.7128	-0.01	0.0014	-0.0086	0.0017	6.963e-07	-0.0109	0.002	3.676e-08	0.882911	0.377285	not_sig	0.376	not_sig
HDL	15	68014971	T	C	rs10518739	7.92598	1.19e-08	0.5415	0.009	0.0013	0.0082	0.0017	9.803e-07	0.0104	0.0019	3.679e-08	-0.870059	0.384268	not_sig	0.9488	not_sig
HDL	15	70182851	A	G	rs77648222	12.9979	1e-13	0.144	0.0354	0.0039	0.0372	0.005	7.113e-14	0.0302	0.0054	3.063e-08	0.959076	0.33752	not_sig	0.08433	not_sig
logTG	15	70189590	A	C	rs12591142	7.58603	2.59e-08	0.1402	-0.022	0.0043	-0.0305	0.006	2.957e-07	-0.0178	0.0065	0.006287	-1.44418	0.148687	not_sig	0.3234	not_sig
logTG	15	72543084	A	G	rs713048	11.3518	4.45e-12	0.7513	0.0123	0.0015	0.0127	0.002	8.552e-11	0.0121	0.0022	2.334e-08	0.202994	0.83914	not_sig	0.3194	not_sig
logTG	15	73091283	T	G	rs3850986	10.1343	7.34e-11	0.3741	-0.01	0.0013	-0.0118	0.0017	6.414e-12	-0.0092	0.002	2.692e-06	-0.996321	0.319094	not_sig	0.1406	not_sig
HDL	15	73431600	T	G	rs2415142	7.42831	3.73e-08	0.5569	-0.009	0.0013	-0.0089	0.0016	4.455e-08	-0.009	0.0018	1.098e-06	0.0418665	0.966605	not_sig	0.7875	not_sig
LDL	15	75116167	T	C	rs12917376	14.4115	3.88e-15	0.4672	-0.012	0.0013	-0.0105	0.0017	1.756e-09	-0.0141	0.002	1.591e-12	1.3812	0.167217	not_sig	0.1747	not_sig
nonHDL	15	75125645	A	C	rs6495122	7.97062	1.07e-08	0.5347	0.0102	0.0016	0.0065	0.0023	0.004978	0.0131	0.0021	3.902e-10	-2.1282	0.0333209	not_sig	0.05541	not_sig
TC	15	75125645	A	C	rs6495122	13.5252	2.98e-14	0.5306	0.0109	0.0013	0.0099	0.0016	1.62e-09	0.0124	0.0019	2.34e-11	-1.01412	0.310524	not_sig	0.3448	not_sig
TC	15	89086653	A	T	rs9920066	8.44881	3.56e-09	0.6624	0.0088	0.0013	0.0096	0.0016	3.657e-09	0.0081	0.0018	8.883e-06	0.62762	0.530253	not_sig	0.1885	not_sig
HDL	15	90214777	A	G	rs139271800	8.01862	9.58e-09	0.0009	0.191	0.0282	0.1911	0.0353	6.277e-08	0.2257	0.0453	6.256e-07	-0.607343	0.543623	not_sig	0.7418	not_sig
logTG	15	90214777	A	G	rs139271800	8.13108	7.39e-09	0.0009	-0.193	0.0282	-0.1882	0.0348	6.21e-08	-0.2303	0.0455	4.166e-07	0.739161	0.459809	not_sig	0.2771	not_sig
HDL	15	96714816	A	C	rs56332871	11.8761	1.33e-12	0.7124	-0.012	0.0014	-0.0093	0.0018	1.717e-07	-0.016	0.002	3.245e-15	2.51068	0.01205	not_sig	0.04924	not_sig
HDL	15	99281192	T	C	rs1976668	8.3898	4.08e-09	0.3983	-0.009	0.0013	-0.0088	0.0016	6.627e-08	-0.01	0.0019	7.488e-08	0.487069	0.626209	not_sig	0.5664	not_sig
HDL	15	102068658	A	G	rs1037117	8.41001	3.89e-09	0.7111	-0.01	0.0014	-0.0103	0.0018	1.014e-08	-0.0095	0.0021	5.345e-06	-0.291623	0.770575	not_sig	0.4361	not_sig
LDL	15	102068658	A	G	rs1037117	9.0188	9.58e-10	0.7216	0.0103	0.0014	0.013	0.0019	2.668e-12	0.0066	0.0022	0.002287	2.21729	0.026603	not_sig	0.06237	not_sig
logTG	15	102068658	A	G	rs1037117	19.5499	2.82e-20	0.7215	-0.015	0.0014	-0.016	0.0018	3.204e-18	-0.0152	0.0021	8.366e-13	-0.290936	0.7711	not_sig	0.2088	not_sig
logTG	16	962154	T	C	rs12600110	20.253	5.58e-21	0.4076	-0.012	0.0013	-0.0129	0.0017	2.881e-14	-0.0127	0.0019	5.171e-11	-0.078909	0.937105	not_sig	0.4954	not_sig
HDL	16	1012393	T	C	rs7404696	15.1349	7.33e-16	0.3254	0.0117	0.0014	0.0132	0.0017	5.249e-14	0.0091	0.002	7.064e-06	1.57482	0.115297	not_sig	0.3157	not_sig
TC	16	1374951	C	G	rs9597	8.48331	3.29e-09	0.0368	-0.024	0.0034	-0.0271	0.0043	2.222e-10	-0.0176	0.0048	0.0002689	-1.48547	0.137418	not_sig	0.1048	not_sig
TC	16	2146288	T	C	rs74002781	7.59302	2.55e-08	0.8619	-0.012	0.002	-0.0125	0.0026	1.68e-06	-0.0116	0.0031	0.0002182	-0.224135	0.822652	not_sig	0.736	not_sig
HDL	16	2163962	A	G	rs28605000	8.43843	3.64e-09	0.1126	0.0108	0.0022	0.0077	0.0028	0.006354	0.0146	0.0034	1.721e-05	-1.57938	0.114249	not_sig	0.6227	not_sig
HDL	16	4014282	C	G	rs2238435	8.59809	2.52e-09	0.5612	-0.009	0.0013	-0.0115	0.0017	4.257e-12	-0.008	0.0019	2.682e-05	-1.38419	0.166302	not_sig	0.0312	not_sig
HDL	16	4677604	A	C	rs12921195	8.42778	3.73e-09	0.8723	0.0148	0.0021	0.0095	0.0028	0.0005779	0.0207	0.0031	1.431e-11	-2.70338	0.00686386	not_sig	0.09598	not_sig
logTG	16	4677604	A	C	rs12921195	12.492	3.22e-13	0.8721	-0.017	0.0021	-0.0179	0.0027	7.497e-11	-0.0149	0.003	9.762e-07	-0.74768	0.454653	not_sig	0.1867	not_sig
HDL	16	11464263	A	G	rs62025680	13.7201	1.91e-14	0.8082	-0.014	0.0016	-0.0139	0.0021	8.146e-11	-0.0163	0.0024	8.813e-12	0.758794	0.447976	not_sig	0.7954	not_sig
LDL	16	11706100	A	G	rs12445804	31.7402	1.82e-32	0.8648	-0.029	0.0023	-0.024	0.0031	7.477e-15	-0.0348	0.0033	2.382e-25	2.4024	0.0162878	not_sig	0.0545	not_sig
nonHDL	16	11706100	A	G	rs12445804	27.3477	4.49e-28	0.8327	-0.03	0.0026	-0.0251	0.0036	3.695e-12	-0.0371	0.0034	1.928e-27	2.43377	0.0149426	not_sig	0.00474	not_sig
TC	16	11706100	A	G	rs12445804	36.6708	2.13e-37	0.8546	-0.031	0.0022	-0.025	0.0029	2.693e-18	-0.0362	0.003	3.261e-33	2.70495	0.00683147	not_sig	0.01717	not_sig
logTG	16	11839326	T	G	rs4780401	8.1254	7.49e-09	0.4305	-0.009	0.0013	-0.0083	0.0017	7.374e-07	-0.0101	0.0019	9.445e-08	0.710181	0.477592	not_sig	0.5879	not_sig
LDL	16	14395073	T	TG	rs142861907	7.78243	1.65e-08	0.6595	0.0101	0.0015	0.0099	0.0019	1.1e-07	0.0102	0.0023	7.786e-06	-0.101269	0.919337	not_sig	0.9455	not_sig
TC	16	14395073	T	TG	rs142861907	9.24751	5.66e-10	0.6594	0.0106	0.0014	0.0102	0.0018	3.334e-08	0.011	0.0022	4.339e-07	-0.28357	0.77674	not_sig	0.5466	not_sig
logTG	16	15150505	A	C	rs12928099	60.4407	3.62e-61	0.7142	0.0259	0.0015	0.0273	0.0019	2.356e-47	0.0257	0.0021	1.794e-33	0.568315	0.569821	not_sig	0.1882	not_sig
HDL	16	15172118	T	C	rs11644601	28.4718	3.37e-29	0.2874	0.0186	0.0015	0.0192	0.0019	1.809e-23	0.0197	0.0022	1.324e-19	-0.173424	0.862318	not_sig	0.6758	not_sig
TC	16	19935389	A	G	rs12446632	9.9404	1.15e-10	0.8686	-0.014	0.0018	-0.0164	0.0024	1.003e-11	-0.0114	0.0027	2.87e-05	-1.39471	0.163103	not_sig	0.1686	not_sig
HDL	16	19967822	T	C	rs11641335	8.4506	3.54e-09	0.8526	-0.012	0.0018	-0.008	0.0024	0.0008247	-0.0176	0.0028	1.973e-10	2.62461	0.00867491	not_sig	0.101	not_sig
TC	16	21089905	T	G	rs66487676	8.12991	7.41e-09	0.5708	-0.008	0.0012	-0.008	0.0015	1.829e-07	-0.0074	0.0017	1.833e-05	-0.266677	0.789718	not_sig	0.2148	not_sig
HDL	16	28865916	A	G	rs7187333	8.71364	1.93e-09	0.6226	0.009	0.0013	0.0105	0.0017	7.597e-10	0.0079	0.002	5.919e-05	0.998669	0.317955	not_sig	0.2393	not_sig
TC	16	28899411	T	C	rs7501203	7.73607	1.84e-08	0.6663	-0.008	0.0013	-0.0093	0.0017	3.567e-08	-0.0068	0.0019	0.0003325	-0.98811	0.323099	not_sig	0.3215	not_sig
HDL	16	29994922	T	C	rs3814883	15.965	1.08e-16	0.5496	0.0123	0.0013	0.0121	0.0017	6.943e-13	0.0146	0.0019	1.591e-14	-0.988704	0.322808	not_sig	0.6473	not_sig
TC	16	30995528	A	G	rs11076	16.3925	4.05e-17	0.6124	-0.012	0.0013	-0.0128	0.0017	9.718e-15	-0.0117	0.0019	3.887e-10	-0.434768	0.663731	not_sig	0.3008	not_sig
LDL	16	31021880	T	G	rs140820592	15.0762	8.39e-16	0.5979	-0.013	0.0014	-0.0112	0.0018	5.001e-10	-0.0168	0.0022	3.535e-14	1.98393	0.0472641	not_sig	0.1291	not_sig
nonHDL	16	31049155	A	G	rs55979739	15.6747	2.12e-16	0.3736	0.0147	0.0016	0.0145	0.0023	2.216e-10	0.0151	0.0021	5.066e-13	-0.193472	0.846589	not_sig	0.8685	not_sig
logTG	16	31110981	A	G	rs7196161	20.6426	2.28e-21	0.3936	-0.014	0.0013	-0.0125	0.0017	1.024e-13	-0.0168	0.0019	3.02e-18	1.69654	0.0897829	not_sig	0.06135	not_sig
HDL	16	31378235	A	G	rs12444713	8.97987	1.05e-09	0.3593	0.0095	0.0014	0.0081	0.0017	3.723e-06	0.0116	0.002	5.577e-09	-1.34436	0.178831	not_sig	0.1638	not_sig
logTG	16	49886366	T	C	rs1861649	7.71101	1.95e-08	0.148	-0.01	0.0018	-0.011	0.0023	1.738e-06	-0.0098	0.0027	0.0003095	-0.340312	0.733622	not_sig	0.7046	not_sig
HDL	16	53126338	T	C	rs8050947	7.50426	3.13e-08	0.6244	-0.008	0.0013	-0.0071	0.0017	1.842e-05	-0.0105	0.0019	2.432e-08	1.34464	0.178742	not_sig	0.07963	not_sig
HDL	16	53806453	A	G	rs56094641	39.3298	4.68e-40	0.3815	-0.019	0.0013	-0.0208	0.0017	2.903e-35	-0.0161	0.0019	3.209e-17	-1.85876	0.0630607	not_sig	0.032	not_sig
logTG	16	53811788	A	G	rs62033400	25.6691	2.14e-26	0.3766	0.0158	0.0013	0.0154	0.0017	9.613e-20	0.0159	0.0019	1.649e-16	-0.197273	0.843614	not_sig	0.2228	not_sig
HDL	16	54820862	A	T	rs568403150	7.30719	4.93e-08	0.9997	0.2002	0.0596	0.2797	0.092	0.002371	0.1076	0.081	0.1841	1.41563	0.156884	not_sig	0.007279	not_sig
HDL	16	55349464	T	C	rs191043807	10.2319	5.86e-11	0.0004	0.279	0.0484	0.2646	0.0741	0.0003542	0.2355	0.0655	0.0003261	0.296673	0.766716	not_sig	0.3109	not_sig
LDL	16	55870239	T	G	rs74019283	9.29086	5.12e-10	0.9457	0.0234	0.0032	0.0224	0.0042	9.531e-08	0.0249	0.0048	2.02e-07	-0.394754	0.693024	not_sig	0.5955	not_sig
HDL	16	55872708	A	G	rs557090110	12.9241	1.19e-13	0.9995	-0.338	0.052	-0.2191	0.0746	0.003327	-0.451	0.0732	7.309e-10	2.23731	0.025266	not_sig	0.0001975	not_sig
HDL	16	56393734	CCT	C	rs560117104	89.4779	3.33e-90	0.0063	-0.22	0.0103	-0.2264	0.0141	9.672e-58	-0.2234	0.0139	9.054e-58	-0.152782	0.87857	not_sig	0.5065	not_sig
LDL	16	56990716	A	C	rs247617	136.37	4.26e-137	0.6896	0.0319	0.0014	0.0157	0.0018	4.356e-19	0.0557	0.002	7.84e-167	-14.972	1.11988e-50	sig	1.102e-29	sig
logTG	16	56990716	A	C	rs247617	117.228	5.91e-118	0.6896	0.0331	0.0013	0.0316	0.0017	1.078e-73	0.0359	0.002	1.582e-72	-1.64776	0.0994017	not_sig	0.8157	not_sig
HDL	16	56991363	T	C	rs183130	5901.29	0	0.6918	-0.231	0.0013	-0.2293	0.0017	0	-0.2413	0.002	0	4.60924	4.04142e-06	sig	0.1118	not_sig
nonHDL	16	56991363	T	C	rs183130	183.922	1.2e-184	0.6913	0.0457	0.0016	0.0319	0.0023	7.553e-44	0.0583	0.0021	5.41e-164	-8.51278	1.69809e-17	sig	4.889e-15	sig
TC	16	56991363	T	C	rs183130	235.19	6.45e-236	0.6928	-0.044	0.0013	-0.0487	0.0017	3.4e-190	-0.0385	0.0019	4.74e-94	-4.03149	5.5425e-05	sig	8.486e-05	sig
HDL	16	57551366	T	C	rs12924311	34.7478	1.79e-35	0.9676	0.0504	0.0038	0.058	0.0051	1.054e-29	0.0469	0.0055	1.692e-17	1.49217	0.135655	not_sig	0.3188	not_sig
HDL	16	63630178	A	G	rs575687164	7.87065	1.35e-08	0.9996	0.1401	0.0505	0.1366	0.0804	0.08912	0.1395	0.0692	0.04389	-0.0275634	0.97801	not_sig	0.7812	not_sig
HDL	16	66071124	C	G	rs191678888	19.0598	8.71e-20	0.9995	0.2622	0.053	0.2222	0.0791	0.004969	0.3521	0.0708	6.651e-07	-1.23379	0.217282	not_sig	0.5867	not_sig
logTG	16	67928042	A	G	rs16942887	12.0282	9.37e-13	0.8653	0.0155	0.0019	0.0137	0.0024	7.372e-09	0.0191	0.0028	7.018e-12	-1.47287	0.140787	not_sig	0.1489	not_sig
TC	16	67973171	T	C	rs1476306	25.9176	1.21e-26	0.7778	-0.018	0.0015	-0.0167	0.002	2.88e-17	-0.02	0.0023	1.87e-18	1.09098	0.275283	not_sig	0.1904	not_sig
HDL	16	67985706	T	C	rs2292318	299.318	4.8e-300	0.8603	-0.07	0.0018	-0.0678	0.0023	2.09e-193	-0.0768	0.0027	4.03e-184	2.55836	0.0105168	not_sig	0.08237	not_sig
HDL	16	68866671	C	G	rs571298027	40.1766	6.66e-41	0.0005	-0.452	0.0328	-0.3986	0.0445	3.093e-19	-0.5218	0.0505	4.978e-25	1.8455	0.0649649	not_sig	0.9907	not_sig
nonHDL	16	69160925	A	G	rs56285339	7.90014	1.26e-08	0.2417	0.0116	0.0018	0.012	0.0025	2.478e-06	0.0113	0.0023	1.365e-06	0.206943	0.836055	not_sig	0.9086	not_sig
TC	16	69376269	A	G	rs11540992	11.8053	1.57e-12	0.9627	0.0282	0.0034	0.0256	0.0045	9.165e-09	0.0329	0.005	4.114e-11	-1.09355	0.274154	not_sig	0.9891	not_sig
LDL	16	69527385	A	G	rs4783577	7.92511	1.19e-08	0.0534	0.0174	0.0031	0.0144	0.004	0.0002973	0.0213	0.0044	1.638e-06	-1.16865	0.242545	not_sig	0.5077	not_sig
logTG	16	69686912	A	G	rs6499240	25.4295	3.72e-26	0.6033	0.015	0.0013	0.0165	0.0017	1.855e-21	0.015	0.0019	1.067e-14	0.591818	0.553973	not_sig	0.9511	not_sig
LDL	16	70375296	A	G	rs62049432	12.7586	1.74e-13	0.9422	-0.023	0.0031	-0.0218	0.0041	9.746e-08	-0.0241	0.0045	1.003e-07	0.38051	0.703567	not_sig	0.656	not_sig
nonHDL	16	70375296	A	G	rs62049432	14.4959	3.19e-15	0.939	-0.031	0.0036	-0.0322	0.0053	1.558e-09	-0.0304	0.0048	2.434e-10	-0.252806	0.800418	not_sig	0.6327	not_sig
TC	16	70375296	A	G	rs62049432	13.3408	4.56e-14	0.9422	-0.023	0.003	-0.0246	0.004	5.267e-10	-0.0227	0.0043	1.692e-07	-0.326017	0.744411	not_sig	0.3942	not_sig
LDL	16	72079657	T	C	rs77303550	247.704	1.98e-248	0.8055	0.0435	0.0016	0.0419	0.0021	1.282e-87	0.0468	0.0024	2.849e-86	-1.54744	0.121758	not_sig	0.9384	not_sig
TC	16	72079657	T	C	rs77303550	293.02	9.54e-294	0.805	0.045	0.0015	0.0447	0.002	2.59e-111	0.0482	0.0022	9.68e-104	-1.18623	0.235531	not_sig	0.7778	not_sig
nonHDL	16	72101525	C	G	rs34042070	207.199	6.32e-208	0.2137	0.0588	0.0018	0.0617	0.0026	6.64e-127	0.0595	0.0024	1.06e-130	0.624418	0.532353	not_sig	0.3451	not_sig
logTG	16	72108093	A	G	rs2000999	35.3935	4.04e-36	0.7972	-0.022	0.0016	-0.0183	0.002	3.26e-19	-0.0297	0.0023	1.514e-37	3.76219	0.000168429	not_sig	0.001349	not_sig
HDL	16	72847307	A	G	rs569043928	17.9641	1.09e-18	0.0002	-0.409	0.0691	-0.3967	0.1092	0.0002785	-0.4805	0.0925	2.063e-07	0.590371	0.554942	not_sig	0.1764	not_sig
TC	16	73095270	CTT	C	rs55725932	11.5327	2.93e-12	0.7188	0.0102	0.0015	0.0112	0.0019	2.401e-09	0.0081	0.0023	0.0003517	1.047	0.295097	not_sig	0.07338	not_sig
LDL	16	73101013	A	G	rs7405169	9.27707	5.28e-10	0.2537	-0.01	0.0015	-0.0121	0.002	6.043e-10	-0.0082	0.0022	0.0002148	-1.32108	0.186475	not_sig	0.1013	not_sig
HDL	16	75205213	A	G	rs17673793	9.36906	4.28e-10	0.2931	0.0094	0.0014	0.0109	0.0018	2.523e-09	0.0094	0.0021	6.051e-06	0.546793	0.584521	not_sig	0.302	not_sig
HDL	16	76458533	A	G	rs559636178	7.30835	4.92e-08	0.9991	0.0585	0.0375	0.09	0.0523	0.08517	0.0038	0.0481	0.9376	1.22321	0.22125	not_sig	0.02056	not_sig
LDL	16	79363079	A	C	rs1121985	10.2965	5.05e-11	0.584	0.009	0.0013	0.0096	0.0017	2.125e-08	0.0085	0.0019	1.365e-05	0.434532	0.663902	not_sig	0.1769	not_sig
nonHDL	16	79363079	A	C	rs1121985	10.7276	1.87e-11	0.5877	0.011	0.0015	0.0118	0.0022	5.848e-08	0.0086	0.002	2.864e-05	1.08088	0.279752	not_sig	0.1602	not_sig
TC	16	79363079	A	C	rs1121985	11.1526	7.04e-12	0.5757	0.0088	0.0012	0.0091	0.0016	1.108e-08	0.0094	0.0018	1.27e-07	-0.125524	0.900109	not_sig	0.373	not_sig
logTG	16	79739978	C	G	rs17689024	11.1882	6.48e-12	0.6957	-0.011	0.0013	-0.0133	0.0017	3.377e-14	-0.0086	0.002	1.397e-05	-1.80104	0.0716964	not_sig	0.04496	not_sig
nonHDL	16	81524274	A	C	rs12443634	9.60272	2.5e-10	0.7243	-0.012	0.0017	-0.0021	0.0025	0.4005	-0.0215	0.0023	3.76e-21	5.73527	9.73599e-09	sig	2.73e-08	sig
HDL	16	81534790	T	C	rs2925979	127.651	2.23e-128	0.6954	0.0349	0.0013	0.0216	0.0018	9.115e-35	0.0529	0.002	2.05e-153	-11.729	9.05446e-32	sig	2.079e-29	sig
logTG	16	81534790	T	C	rs2925979	68.4624	3.45e-69	0.6951	-0.025	0.0013	-0.0127	0.0017	3.822e-13	-0.0438	0.002	9.97e-108	11.9175	9.59107e-33	sig	1.46e-30	sig
TC	16	81683801	T	C	rs184068091	8.6003	2.51e-09	0.9997	0.3073	0.0649	0.4322	0.108	6.315e-05	0.3396	0.0885	0.0001248	0.668209	0.504	not_sig	0.1332	not_sig
LDL	16	83979317	T	C	rs67890964	35.1409	7.23e-36	0.3916	-0.019	0.0014	-0.0196	0.0018	7.04e-29	-0.0178	0.002	2.583e-18	-0.673738	0.500478	not_sig	0.869	not_sig
nonHDL	16	83979317	T	C	rs67890964	22.0076	9.83e-23	0.4108	-0.018	0.0016	-0.0194	0.0024	2.207e-16	-0.0174	0.0022	1.55e-15	-0.616923	0.537285	not_sig	0.7086	not_sig
TC	16	83979317	T	C	rs67890964	32.2822	5.22e-33	0.3942	-0.018	0.0013	-0.0178	0.0017	1.866e-25	-0.0168	0.0019	4.373e-18	-0.395244	0.692663	not_sig	0.7732	not_sig
HDL	16	85150163	A	G	rs79311290	8.2569	5.53e-09	0.1057	-0.017	0.0024	-0.0139	0.003	4.724e-06	-0.0199	0.0035	1.412e-08	1.3123	0.189418	not_sig	0.3796	not_sig
logTG	16	85150163	A	G	rs79311290	11.5883	2.58e-12	0.1064	0.0191	0.0023	0.0184	0.003	9.458e-10	0.0208	0.0034	1.074e-09	-0.532413	0.59444	not_sig	0.7393	not_sig
HDL	16	85927519	C	G	rs896263	9.44848	3.56e-10	0.2634	0.0111	0.0015	0.0099	0.002	6.425e-07	0.0135	0.0022	6.22e-10	-1.22086	0.22214	not_sig	0.2899	not_sig
nonHDL	16	86430254	A	G	rs17265458	8.78007	1.66e-09	0.2415	0.0127	0.0018	0.0145	0.0026	1.397e-08	0.0132	0.0024	2.402e-08	0.368975	0.712147	not_sig	0.8591	not_sig
logTG	16	86434553	T	C	rs8054124	11.0638	8.63e-12	0.2288	0.012	0.0015	0.011	0.0019	1.079e-08	0.0137	0.0022	3.826e-10	-0.93428	0.350159	not_sig	0.183	not_sig
HDL	16	88004092	A	G	rs12926107	14.2159	6.08e-15	0.4109	-0.012	0.0014	-0.014	0.0018	2.134e-14	-0.0123	0.002	9.395e-10	-0.637037	0.524101	not_sig	0.8805	not_sig
logTG	16	88006065	T	C	rs12931143	8.83054	1.48e-09	0.4503	0.0093	0.0014	0.0112	0.0018	2.418e-10	0.0092	0.002	2.563e-06	0.74768	0.454653	not_sig	0.803	not_sig
TC	16	88535407	C	G	rs35613341	18.3078	4.92e-19	0.3367	-0.014	0.0013	-0.0104	0.0017	2.168e-09	-0.0182	0.002	5.238e-20	2.99422	0.00275149	not_sig	0.009772	not_sig
HDL	16	88535670	T	C	rs34088055	12.7161	1.92e-13	0.6531	0.012	0.0014	0.0107	0.0018	4.053e-09	0.0127	0.0021	1.168e-09	-0.729057	0.465967	not_sig	0.942	not_sig
LDL	16	88567333	T	C	rs74035509	17.3562	4.4e-18	0.9104	-0.023	0.0024	-0.0242	0.0031	4.853e-15	-0.0225	0.0036	2.749e-10	-0.360374	0.718567	not_sig	0.7487	not_sig
nonHDL	16	88567333	T	C	rs74035509	13.3233	4.75e-14	0.9131	-0.024	0.0028	-0.0285	0.0041	2.328e-12	-0.0208	0.0038	5.884e-08	-1.38332	0.166568	not_sig	0.1119	not_sig
HDL	17	481604	T	C	rs11870735	14.3716	4.25e-15	0.8273	0.0146	0.0017	0.0136	0.0022	4.902e-10	0.0162	0.0025	9.723e-11	-0.787197	0.431167	not_sig	0.4846	not_sig
logTG	17	481604	T	C	rs11870735	8.77975	1.66e-09	0.8268	-0.012	0.0017	-0.0093	0.0022	1.71e-05	-0.0147	0.0025	3.502e-09	1.63108	0.102873	not_sig	0.1026	not_sig
logTG	17	1618363	T	C	rs11078597	23.101	7.92e-24	0.194	0.0182	0.0016	0.0176	0.0021	9.344e-18	0.0204	0.0024	7.624e-18	-0.883169	0.377145	not_sig	0.7358	not_sig
nonHDL	17	1622850	C	G	rs12948283	10.2816	5.23e-11	0.7186	-0.014	0.0021	-0.013	0.0029	9.183e-06	-0.0155	0.0026	4.718e-09	0.64461	0.51918	not_sig	0.6109	not_sig
LDL	17	1958609	T	C	rs4480845	8.01854	9.58e-09	0.6168	-0.009	0.0013	-0.0108	0.0017	4.62e-10	-0.0079	0.002	5.884e-05	-1.11263	0.265865	not_sig	0.4283	not_sig
TC	17	1958609	T	C	rs4480845	15.6639	2.17e-16	0.6062	-0.012	0.0013	-0.0133	0.0016	3.871e-16	-0.0107	0.0018	3.71e-09	-1.08787	0.276651	not_sig	0.3291	not_sig
HDL	17	2064702	A	T	rs2873195	8.54803	2.83e-09	0.6614	-0.009	0.0014	-0.0072	0.0018	6.796e-05	-0.0117	0.0022	8.529e-08	1.59603	0.110483	not_sig	0.2109	not_sig
HDL	17	3902650	A	T	rs8081417	10.9092	1.23e-11	0.6835	0.0092	0.0014	0.0078	0.0018	9.713e-06	0.011	0.002	3.49e-08	-1.19913	0.230478	not_sig	0.6772	not_sig
LDL	17	4676420	A	G	rs2089483	21.1159	7.66e-22	0.6746	-0.014	0.0014	-0.0161	0.0018	8.815e-19	-0.0124	0.0021	2.645e-09	-1.34722	0.177909	not_sig	0.2304	not_sig
logTG	17	4692640	T	G	rs79202680	52.7341	1.84e-53	0.9943	0.1476	0.0089	0.1312	0.0117	4.584e-29	0.1615	0.013	1.503e-35	-1.74267	0.0813914	not_sig	0.01933	not_sig
nonHDL	17	4692640	T	G	rs79202680	28.0363	9.2e-29	0.9939	0.1183	0.01	0.1156	0.0145	1.825e-15	0.116	0.0141	1.713e-16	-0.0198622	0.984153	not_sig	0.8508	not_sig
TC	17	4692640	T	G	rs79202680	35.823	1.5e-36	0.9944	0.1184	0.0087	0.1072	0.0116	2.145e-20	0.1276	0.0127	1.007e-23	-1.19515	0.232028	not_sig	0.1521	not_sig
LDL	17	5270010	A	G	rs145437104	8.73362	1.85e-09	0.9953	0.0647	0.0097	0.0569	0.0128	8.29e-06	0.0764	0.0143	8.863e-08	-1.0233	0.306167	not_sig	0.6905	not_sig
LDL	17	7069412	A	G	rs186021206	211.297	5.05e-212	0.9948	0.321	0.0106	0.3029	0.014	1.8e-103	0.3196	0.0149	8.81e-102	-0.822663	0.4107	not_sig	0.3072	not_sig
nonHDL	17	7069412	A	G	rs186021206	168.207	6.22e-169	0.9947	0.3179	0.0118	0.2985	0.0177	1.299e-63	0.3201	0.0158	3.81e-91	-0.914273	0.360574	not_sig	0.2832	not_sig
TC	17	7069412	A	G	rs186021206	150.957	1.1e-151	0.9949	0.2663	0.0101	0.2601	0.0136	1.21e-81	0.2636	0.0142	2.258e-76	-0.179381	0.857639	not_sig	0.6458	not_sig
logTG	17	7106378	A	G	rs200489612	18.4147	3.85e-19	0.996	0.1134	0.012	0.0989	0.0158	3.57e-10	0.1321	0.0169	6.09e-15	-1.44352	0.148874	not_sig	0.03941	not_sig
HDL	17	7462969	A	G	rs3803800	23.9281	1.18e-24	0.7242	0.0158	0.0015	0.0124	0.0019	4.578e-11	0.0216	0.0022	1.222e-22	-3.19099	0.00141784	not_sig	0.03736	not_sig
LDL	17	7571080	A	G	rs9894946	15.1489	7.1e-16	0.8414	-0.017	0.0019	-0.017	0.0024	2.157e-12	-0.0179	0.0028	8.344e-11	0.245777	0.805855	not_sig	0.9581	not_sig
nonHDL	17	7571080	A	G	rs9894946	20.2313	5.87e-21	0.8387	-0.023	0.0022	-0.0235	0.0032	1.223e-13	-0.0202	0.003	9.032e-12	-0.75556	0.449913	not_sig	0.8505	not_sig
TC	17	7571080	A	G	rs9894946	21.9328	1.17e-22	0.8423	-0.02	0.0018	-0.0219	0.0023	5.996e-21	-0.0174	0.0026	2.528e-11	-1.30628	0.191457	not_sig	0.3558	not_sig
HDL	17	8109598	A	G	rs6503091	10.4764	3.34e-11	0.428	0.0097	0.0013	0.0095	0.0016	7.746e-09	0.0104	0.0019	2.873e-08	-0.365302	0.714886	not_sig	0.3971	not_sig
LDL	17	8214427	A	G	rs9908765	20.3441	4.53e-21	0.4848	-0.014	0.0013	-0.0154	0.0017	9.047e-21	-0.0113	0.0019	2.499e-09	-1.61962	0.105314	not_sig	0.01863	not_sig
TC	17	8216468	T	C	rs871841	25.3515	4.45e-26	0.5189	0.0147	0.0012	0.0151	0.0016	5.522e-21	0.0145	0.0018	1.559e-15	0.251048	0.801777	not_sig	0.2179	not_sig
nonHDL	17	8219478	A	G	rs2270445	13.0249	9.44e-14	0.5099	0.0127	0.0015	0.0127	0.0022	5.391e-09	0.012	0.002	2.297e-09	0.236442	0.81309	not_sig	0.6153	not_sig
LDL	17	9791780	A	T	rs77902029	10.1874	6.49e-11	0.6932	-0.01	0.0015	-0.0089	0.0019	2.238e-06	-0.0103	0.0021	1.657e-06	0.497886	0.618564	not_sig	0.5575	not_sig
TC	17	9791780	A	T	rs77902029	13.9822	1.04e-14	0.693	-0.012	0.0014	-0.0102	0.0018	2.774e-08	-0.0125	0.0021	1.272e-09	0.837915	0.402078	not_sig	0.6728	not_sig
logTG	17	17456746	A	G	rs9897362	23.33	4.68e-24	0.9003	-0.027	0.0025	-0.0223	0.0031	1.27e-12	-0.0344	0.0037	1.489e-20	2.52137	0.0116899	not_sig	0.02713	not_sig
HDL	17	17483297	A	G	rs28583584	14.8924	1.28e-15	0.9328	0.0248	0.0027	0.0202	0.0034	4.931e-09	0.0324	0.004	2.665e-16	-2.34303	0.0191278	not_sig	0.1436	not_sig
nonHDL	17	17634550	T	C	rs71367414	9.29867	5.03e-10	0.8012	0.014	0.0021	0.0096	0.0031	0.001714	0.0162	0.0028	5.307e-09	-1.58671	0.112578	not_sig	0.2458	not_sig
TC	17	18112675	T	C	rs3088233	14.9067	1.24e-15	0.7962	-0.014	0.0015	-0.0158	0.002	3.578e-15	-0.0122	0.0023	9.598e-08	-1.19016	0.233984	not_sig	0.09484	not_sig
LDL	17	18116455	T	C	rs62072467	11.1867	6.51e-12	0.8159	-0.013	0.0017	-0.0156	0.0022	2.269e-12	-0.0111	0.0025	1.006e-05	-1.3609	0.173545	not_sig	0.3023	not_sig
LDL	17	18679442	A	G	rs9909417	7.67637	2.11e-08	0.6946	-0.01	0.0014	-0.0095	0.0018	2.155e-07	-0.0089	0.0021	1.814e-05	-0.218468	0.827064	not_sig	0.9489	not_sig
TC	17	21281466	A	G	rs7215815	7.74745	1.79e-08	0.6336	-0.009	0.0013	-0.0085	0.0017	3.401e-07	-0.0089	0.0018	1.116e-06	0.162805	0.870672	not_sig	0.7254	not_sig
LDL	17	26694861	A	G	rs704	46.9493	1.12e-47	0.5022	-0.019	0.0013	-0.0205	0.0016	2.466e-36	-0.0187	0.0019	3.996e-23	-0.729775	0.465527	not_sig	0.2587	not_sig
logTG	17	26694861	A	G	rs704	14.6514	2.23e-15	0.5022	0.0112	0.0012	0.0095	0.0016	3.542e-09	0.0136	0.0019	2.182e-13	-1.66025	0.0968647	not_sig	0.0915	not_sig
nonHDL	17	26694861	A	G	rs704	18.0566	8.78e-19	0.5032	-0.015	0.0015	-0.0167	0.0022	5.74e-14	-0.0139	0.002	7.501e-12	-0.945768	0.344267	not_sig	0.5221	not_sig
HDL	17	26721895	A	G	rs1128161	9.37951	4.17e-10	0.4249	0.0088	0.0012	0.0092	0.0016	1.243e-08	0.0099	0.0018	6.549e-08	-0.293065	0.769472	not_sig	0.4417	not_sig
TC	17	27035335	A	G	rs12601110	22.9226	1.19e-23	0.0983	-0.022	0.0021	-0.0207	0.0027	1.496e-14	-0.0252	0.0031	1.817e-16	1.10301	0.270022	not_sig	0.4202	not_sig
nonHDL	17	27645258	A	G	rs56336338	10.7992	1.59e-11	0.8472	0.0171	0.0021	0.0188	0.0031	7.747e-10	0.0182	0.0029	3.488e-10	0.141949	0.887121	not_sig	0.7483	not_sig
TC	17	27648542	A	G	rs56853305	22.5464	2.84e-23	0.8534	0.02	0.0018	0.0183	0.0023	1.954e-15	0.0211	0.0025	1.234e-16	-0.830589	0.406206	not_sig	0.5228	not_sig
logTG	17	27889643	T	C	rs62070804	10.5475	2.83e-11	0.9839	-0.041	0.0052	-0.0229	0.0066	0.0004768	-0.0604	0.0078	9.781e-15	3.6916	0.000222848	not_sig	0.0003612	not_sig
LDL	17	28583498	C	G	rs111919672	7.97456	1.06e-08	0.0722	-0.02	0.0029	-0.0193	0.004	1.31e-06	-0.0222	0.004	2.515e-08	0.516331	0.605623	not_sig	0.8144	not_sig
TC	17	28640992	C	G	rs11870192	11.8055	1.56e-12	0.733	0.0104	0.0014	0.0093	0.0018	2.645e-07	0.0114	0.002	1.487e-08	-0.786455	0.431601	not_sig	0.2878	not_sig
nonHDL	17	29410944	A	G	rs2940182	23.3243	4.74e-24	0.664	0.018	0.0016	0.0177	0.0023	3.267e-14	0.0203	0.0022	5.544e-21	-0.820404	0.411986	not_sig	0.2879	not_sig
LDL	17	29413614	A	G	rs2008998	29.0735	8.44e-30	0.3447	-0.018	0.0014	-0.0169	0.0019	9.052e-19	-0.0196	0.0021	4.89e-21	0.960209	0.33695	not_sig	0.2173	not_sig
TC	17	29413614	A	G	rs2008998	31.3822	4.15e-32	0.3493	-0.017	0.0014	-0.0165	0.0018	1.171e-20	-0.0197	0.0019	5.561e-25	1.23209	0.217916	not_sig	0.2425	not_sig
nonHDL	17	32893285	A	T	rs757225592	7.97335	1.06e-08	0.0003	-0.392	0.0784	-0.3944	0.1195	0.0009641	-0.3545	0.0995	0.0003656	-0.257674	0.796659	not_sig	0.3133	not_sig
logTG	17	34841617	T	G	rs4796223	7.73275	1.85e-08	0.4628	-0.009	0.0013	-0.0077	0.0016	1.915e-06	-0.0102	0.0019	4.463e-08	1.01235	0.311373	not_sig	0.2123	not_sig
nonHDL	17	34946547	T	C	rs12603276	10.277	5.29e-11	0.4723	-0.01	0.0015	-0.0101	0.0022	3.518e-06	-0.0101	0.002	4.769e-07	0	1	not_sig	0.6343	not_sig
nonHDL	17	37067261	T	C	rs640306	7.58212	2.62e-08	0.6436	-0.01	0.0016	-0.0118	0.0023	1.85e-07	-0.0097	0.0021	3.345e-06	-0.677153	0.498309	not_sig	0.6667	not_sig
LDL	17	37070737	A	G	rs525767	10.3942	4.03e-11	0.6536	-0.01	0.0013	-0.0106	0.0017	1.053e-09	-0.0102	0.002	2.361e-07	-0.153467	0.87803	not_sig	0.6673	not_sig
TC	17	37070737	A	G	rs525767	9.36694	4.3e-10	0.6482	-0.009	0.0013	-0.0111	0.0016	5.521e-12	-0.0075	0.0018	3.364e-05	-1.50629	0.131993	not_sig	0.4328	not_sig
HDL	17	37810218	C	G	rs881844	93.6614	2.18e-94	0.6179	0.0288	0.0013	0.0315	0.0017	6.518e-78	0.0271	0.0019	2.633e-45	1.74012	0.0818382	not_sig	0.007715	not_sig
TC	17	37893484	T	C	rs4795393	20.5836	2.61e-21	0.4101	-0.013	0.0013	-0.016	0.0016	2.054e-22	-0.0107	0.0019	9.533e-09	-2.14994	0.0315598	not_sig	0.01365	not_sig
LDL	17	37970365	T	C	rs12943633	9.33557	4.62e-10	0.888	0.0146	0.0023	0.0171	0.0029	3.543e-09	0.0126	0.0034	0.0002173	1.01412	0.310526	not_sig	0.08623	not_sig
HDL	17	38505824	C	G	rs2586116	10.7933	1.61e-11	0.2427	-0.013	0.0016	-0.0116	0.0021	3.451e-08	-0.0145	0.0023	4.856e-10	0.938863	0.347801	not_sig	0.7662	not_sig
nonHDL	17	39967442	T	C	rs13412	7.81271	1.54e-08	0.367	-0.011	0.0016	-0.0109	0.0023	2.577e-06	-0.0129	0.0021	1.915e-09	0.644908	0.518987	not_sig	0.4036	not_sig
HDL	17	40359483	A	G	rs180705493	10.6129	2.44e-11	0.9966	0.1109	0.0135	0.1193	0.0173	5.775e-12	0.1019	0.02	3.62e-07	0.663419	0.507062	not_sig	0.6383	not_sig
TC	17	40536804	C	G	rs62075782	10.1316	7.39e-11	0.775	0.0123	0.0016	0.0133	0.0022	9.111e-10	0.0117	0.0023	5.764e-07	0.506588	0.612444	not_sig	0.1461	not_sig
LDL	17	40546652	A	G	rs2354155	8.27027	5.37e-09	0.4829	0.0086	0.0014	0.0079	0.0018	8.286e-06	0.0107	0.002	6.611e-08	-1.04804	0.294622	not_sig	0.6274	not_sig
nonHDL	17	40598129	A	G	rs34349578	10.6306	2.34e-11	0.7298	-0.012	0.0019	-0.0105	0.0026	6.78e-05	-0.0127	0.0025	2.79e-07	0.612553	0.540172	not_sig	0.7839	not_sig
logTG	17	40731597	A	T	rs6963	17.2544	5.57e-18	0.709	-0.013	0.0014	-0.012	0.0018	1.832e-11	-0.0161	0.002	2.177e-15	1.53274	0.125339	not_sig	0.7424	not_sig
HDL	17	41166479	T	TTC	rs200576810	32.9075	1.24e-33	0.9888	0.0954	0.0074	0.1025	0.0097	5.92e-26	0.0894	0.0107	6.2e-17	0.914582	0.360411	not_sig	0.4751	not_sig
logTG	17	41387617	A	G	rs62079603	13.8061	1.56e-14	0.5749	0.0129	0.0015	0.0141	0.0019	1.363e-13	0.0121	0.0022	4.833e-08	0.692059	0.4889	not_sig	0.6426	not_sig
HDL	17	41926126	T	C	rs72836561	453.378	0	0.9706	0.1874	0.004	0.1982	0.0051	0	0.1725	0.0059	1.65e-187	3.32259	0.000891856	not_sig	1.778e-05	sig
LDL	17	41926126	T	C	rs72836561	13.6324	2.33e-14	0.9705	0.0324	0.004	0.0419	0.0051	1.817e-16	0.0198	0.0059	0.000757	2.85392	0.0043184	not_sig	0.134	not_sig
logTG	17	41926126	T	C	rs72836561	298.381	4.16e-299	0.9705	-0.149	0.0039	-0.1551	0.005	1.12e-207	-0.1405	0.0058	1.51e-129	-1.91777	0.05514	not_sig	0.07458	not_sig
TC	17	41926126	T	C	rs72836561	16.637	2.31e-17	0.9706	0.0375	0.0038	0.0336	0.005	1.426e-11	0.0427	0.0057	4.631e-14	-1.20937	0.226521	not_sig	0.6878	not_sig
logTG	17	42626279	A	G	rs72824773	9.6907	2.04e-10	0.9942	-0.075	0.0099	-0.0832	0.0133	4.08e-10	-0.0664	0.0136	1.1e-06	-0.88841	0.37432	not_sig	0.9328	not_sig
TC	17	45008742	C	G	rs197923	11.7633	1.72e-12	0.652	-0.01	0.0013	-0.0083	0.0016	2.668e-07	-0.0124	0.0018	4.319e-12	1.71549	0.0862547	not_sig	0.05119	not_sig
HDL	17	45024027	A	G	rs8065527	7.94567	1.13e-08	0.6538	-0.009	0.0013	-0.0103	0.0017	1.022e-09	-0.0078	0.0019	3.922e-05	-0.988704	0.322808	not_sig	0.1517	not_sig
TC	17	45650196	T	C	rs12603290	81.5573	2.77e-82	0.5166	-0.026	0.0012	-0.0205	0.0016	1.445e-37	-0.0342	0.0018	8.494e-85	5.73226	9.91011e-09	sig	3.047e-06	sig
nonHDL	17	45653291	T	G	rs8077106	49.7431	1.81e-50	0.523	-0.024	0.0015	-0.0178	0.0021	1.307e-16	-0.0313	0.002	1.745e-55	4.67514	2.93752e-06	sig	2.932e-06	sig
logTG	17	45697549	C	G	rs7207542	9.90373	1.25e-10	0.487	0.0095	0.0013	0.0087	0.0016	8.774e-08	0.0102	0.0019	4.138e-08	-0.607408	0.54358	not_sig	0.09949	not_sig
LDL	17	45732605	A	G	rs11870935	87.0812	8.3e-88	0.4834	0.0264	0.0013	0.0221	0.0016	8.186e-42	0.0344	0.0019	7.275e-76	-4.9868	6.13879e-07	sig	9.378e-06	sig
HDL	17	45737275	A	T	rs4264433	22.7684	1.7e-23	0.5248	-0.014	0.0013	-0.0126	0.0016	7.079e-15	-0.0172	0.0019	1.14e-20	1.8671	0.0618877	not_sig	0.1051	not_sig
logTG	17	46197755	A	G	rs10775406	18.011	9.75e-19	0.7327	0.0143	0.0014	0.0158	0.0018	6.149e-18	0.0153	0.0021	5.501e-13	0.181835	0.855712	not_sig	0.4517	not_sig
HDL	17	46272609	A	G	rs11650182	20.284	5.2e-21	0.0686	0.0279	0.0026	0.0269	0.0034	5.907e-15	0.0284	0.0038	1.27e-13	-0.296611	0.766763	not_sig	0.8866	not_sig
TC	17	46529501	T	C	rs12942428	18.5845	2.6e-19	0.3249	-0.013	0.0013	-0.0123	0.0016	3.711e-14	-0.0135	0.0018	1.207e-13	0.502096	0.6156	not_sig	0.6326	not_sig
LDL	17	46657927	A	G	rs3809782	19.8335	1.47e-20	0.3541	-0.014	0.0013	-0.0129	0.0017	4.166e-14	-0.0169	0.0019	4.335e-18	1.58012	0.11408	not_sig	0.08174	not_sig
nonHDL	17	46661292	A	G	rs2288278	14.285	5.19e-15	0.3546	-0.014	0.0016	-0.0121	0.0023	1.424e-07	-0.0169	0.0021	1.521e-15	1.54778	0.121676	not_sig	0.09852	not_sig
HDL	17	47060322	A	C	rs35895680	11.2664	5.42e-12	0.7004	-0.011	0.0014	-0.0124	0.0019	3.761e-11	-0.0098	0.0021	3.727e-06	-0.925706	0.354599	not_sig	0.197	not_sig
logTG	17	47450775	A	G	rs28394864	24.3987	3.99e-25	0.5642	-0.014	0.0013	-0.0156	0.0017	4.318e-21	-0.0136	0.0019	3.654e-13	-0.78909	0.430059	not_sig	0.9787	not_sig
logTG	17	48624523	A	C	rs9890200	7.38657	4.11e-08	0.3791	-0.008	0.0013	-0.009	0.0017	1.562e-07	-0.0079	0.002	6.32e-05	-0.42152	0.673375	not_sig	0.3527	not_sig
TC	17	49252238	T	C	rs41524846	8.2222	6e-09	0.2465	-0.009	0.0014	-0.0082	0.0019	1.399e-05	-0.011	0.0021	1.019e-07	0.996315	0.319097	not_sig	0.134	not_sig
nonHDL	17	49328705	T	C	rs9896627	8.82702	1.49e-09	0.7596	0.0123	0.0017	0.0122	0.0025	1.2e-06	0.0135	0.0023	5.199e-09	-0.384322	0.70074	not_sig	0.6983	not_sig
logTG	17	49338257	T	C	rs14180	8.79746	1.59e-09	0.8922	0.014	0.0021	0.0116	0.0027	1.845e-05	0.0168	0.003	1.842e-08	-1.29598	0.194983	not_sig	0.2988	not_sig
HDL	17	53400110	T	C	rs12940636	11.8152	1.53e-12	0.3294	0.0103	0.0013	0.0103	0.0017	1.929e-09	0.0106	0.0019	3.299e-08	-0.118644	0.905557	not_sig	0.2267	not_sig
logTG	17	55210713	A	G	rs8066617	9.35296	4.44e-10	0.375	-0.01	0.0013	-0.0097	0.0017	1.422e-08	-0.0115	0.0019	3.372e-09	0.710181	0.477592	not_sig	0.3058	not_sig
TC	17	56409956	T	C	rs116985917	7.73946	1.82e-08	0.1076	-0.015	0.0021	-0.0137	0.0028	9.506e-07	-0.0177	0.0029	1.415e-09	0.99994	0.31734	not_sig	0.9242	not_sig
logTG	17	57925649	A	G	rs1292072	20.5481	2.83e-21	0.2339	0.0153	0.0015	0.017	0.002	9.195e-18	0.0135	0.0022	1.258e-09	1.18413	0.236362	not_sig	0.04511	not_sig
LDL	17	57926911	T	C	rs1292071	11.9928	1.02e-12	0.4799	-0.011	0.0013	-0.0139	0.0017	8.323e-17	-0.0072	0.0019	0.0001398	-2.64669	0.00812827	not_sig	0.0069	not_sig
TC	17	57926911	T	C	rs1292071	8.25445	5.57e-09	0.4837	-0.009	0.0012	-0.0103	0.0016	3.041e-11	-0.007	0.0017	6.567e-05	-1.42447	0.154312	not_sig	0.1007	not_sig
HDL	17	57932314	A	T	rs1292066	10.135	7.33e-11	0.7429	0.0106	0.0015	0.0142	0.0019	1.613e-14	0.0064	0.0021	0.002738	2.77712	0.00548431	not_sig	0.002719	not_sig
HDL	17	61887693	T	C	rs2727295	7.41507	3.85e-08	0.4108	-0.008	0.0013	-0.009	0.0017	6.144e-08	-0.0073	0.0019	0.0001202	-0.672319	0.501381	not_sig	0.5792	not_sig
LDL	17	64210580	A	C	rs1801689	93.7261	1.88e-94	0.0255	0.0896	0.0042	0.0868	0.0053	6.744e-60	0.0928	0.0063	4.117e-49	-0.733938	0.462987	not_sig	0.6393	not_sig
logTG	17	64210580	A	C	rs1801689	43.1073	7.81e-44	0.0254	-0.06	0.0041	-0.0756	0.0053	1.459e-46	-0.0403	0.0062	8.632e-11	-4.35315	1.34195e-05	sig	0.0003098	not_sig
nonHDL	17	64224775	T	C	rs8178824	29.3661	4.3e-30	0.9765	-0.063	0.0052	-0.0547	0.0075	4.084e-13	-0.0727	0.0069	3.157e-26	1.77379	0.0760973	not_sig	0.1089	not_sig
TC	17	64224775	T	C	rs8178824	44.8108	1.55e-45	0.9748	-0.062	0.004	-0.0574	0.0052	6.356e-28	-0.0681	0.006	1.564e-29	1.35795	0.174479	not_sig	0.3471	not_sig
nonHDL	17	65109591	T	G	rs9893194	14.9731	1.06e-15	0.5052	0.0139	0.0015	0.0166	0.0022	3.133e-14	0.012	0.002	3.011e-09	1.55376	0.120241	not_sig	0.2245	not_sig
TC	17	65123352	A	C	rs6504487	15.8491	1.42e-16	0.4738	-0.012	0.0012	-0.0137	0.0016	1.926e-17	-0.0098	0.0018	8.588e-08	-1.63181	0.102719	not_sig	0.08999	not_sig
LDL	17	65140921	A	C	rs12450155	16.2862	5.17e-17	0.4933	0.0123	0.0013	0.0144	0.0017	3.601e-18	0.0096	0.0019	5.006e-07	1.89614	0.0579416	not_sig	0.08315	not_sig
logTG	17	65272255	A	G	rs4790985	7.83358	1.47e-08	0.6532	-0.009	0.0014	-0.0071	0.0018	7.672e-05	-0.0113	0.002	2.475e-08	1.57013	0.116385	not_sig	0.04217	not_sig
LDL	17	65839210	A	G	rs8073510	18.5142	3.06e-19	0.236	0.0159	0.0016	0.013	0.002	1.816e-10	0.0178	0.0023	1.851e-14	-1.58602	0.112735	not_sig	0.1421	not_sig
nonHDL	17	65839210	A	G	rs8073510	25.5927	2.55e-26	0.2682	0.0214	0.0018	0.0196	0.0026	2.812e-14	0.0203	0.0024	5.805e-17	-0.198679	0.842514	not_sig	0.655	not_sig
TC	17	65839210	A	G	rs8073510	20.9169	1.21e-21	0.2594	0.016	0.0015	0.0143	0.0019	4.148e-14	0.0179	0.0021	3.576e-17	-1.28098	0.200202	not_sig	0.2225	not_sig
HDL	17	65938655	A	G	rs8071463	15.9386	1.15e-16	0.2953	-0.014	0.0015	-0.0144	0.0019	1.896e-14	-0.0137	0.0022	2.108e-10	-0.242793	0.808166	not_sig	0.9221	not_sig
logTG	17	65980289	A	G	rs11656743	46.3413	4.56e-47	0.2866	0.0231	0.0015	0.0214	0.0019	4.6e-29	0.0253	0.0022	2.746e-30	-1.34952	0.177171	not_sig	0.3426	not_sig
LDL	17	66394054	T	C	rs9889884	11.7163	1.92e-12	0.771	0.0127	0.0016	0.0135	0.0021	6.075e-11	0.0124	0.0023	7.577e-08	0.355712	0.722056	not_sig	0.7079	not_sig
HDL	17	66879927	T	C	rs34931250	55.0076	9.83e-56	0.9419	0.0485	0.0029	0.0486	0.0038	3.166e-37	0.0501	0.0043	2.979e-31	-0.263556	0.792122	not_sig	0.187	not_sig
LDL	17	67081278	A	G	rs77542162	274.602	2.5e-275	0.0192	0.1832	0.005	0.1789	0.0065	9.88e-167	0.182	0.0073	2.29e-136	-0.319413	0.749413	not_sig	0.9726	not_sig
logTG	17	67081278	A	G	rs77542162	18.0263	9.41e-19	0.0191	-0.049	0.005	-0.0412	0.0065	1.678e-10	-0.0539	0.0072	7.826e-14	1.31701	0.187837	not_sig	0.263	not_sig
nonHDL	17	67081278	A	G	rs77542162	145.409	3.9e-146	0.0194	0.1587	0.006	0.1664	0.0088	3.912e-80	0.1466	0.0079	3.9e-77	1.68145	0.0926753	not_sig	0.1237	not_sig
TC	17	67081278	A	G	rs77542162	174.962	1.09e-175	0.0191	0.1431	0.0048	0.139	0.0064	3.1e-106	0.1463	0.007	1.14e-96	-0.775581	0.437996	not_sig	0.3836	not_sig
LDL	17	68169005	A	G	rs9890133	10.5583	2.77e-11	0.1238	0.0146	0.002	0.0123	0.0025	1.443e-06	0.0168	0.0029	4.515e-09	-1.18363	0.236559	not_sig	0.4306	not_sig
nonHDL	17	68169005	A	G	rs9890133	11.6894	2.04e-12	0.1201	0.0169	0.0023	0.0172	0.0033	1.644e-07	0.0163	0.003	6.963e-08	0.202665	0.839397	not_sig	0.6203	not_sig
TC	17	68169005	A	G	rs9890133	10.8065	1.56e-11	0.1232	0.0143	0.0018	0.0123	0.0024	2.981e-07	0.0147	0.0027	3.892e-08	-0.669461	0.503201	not_sig	0.8167	not_sig
logTG	17	68431026	T	C	rs1396514	13.6003	2.51e-14	0.4705	0.0112	0.0013	0.0094	0.0016	5.925e-09	0.0137	0.0018	9.659e-14	-1.796	0.0724948	not_sig	0.1121	not_sig
HDL	17	68507436	T	C	rs1594477	10.852	1.41e-11	0.676	0.0107	0.0013	0.0096	0.0017	2.28e-08	0.0126	0.0019	7.648e-11	-1.18644	0.235447	not_sig	0.1392	not_sig
HDL	17	70295760	A	G	rs1029645	7.36285	4.34e-08	0.4554	0.0088	0.0012	0.0081	0.0016	7.443e-07	0.0093	0.0019	4.685e-07	-0.487069	0.626209	not_sig	0.9183	not_sig
logTG	17	70295760	A	G	rs1029645	7.4331	3.69e-08	0.4558	-0.009	0.0012	-0.0092	0.0016	1.355e-08	-0.0071	0.0018	9.658e-05	-0.877115	0.380424	not_sig	0.2028	not_sig
logTG	17	73272060	A	T	rs7222784	11.9579	1.1e-12	0.3115	-0.011	0.0015	-0.0131	0.0019	4.67e-12	-0.0076	0.0023	0.0009419	-1.85434	0.0636899	not_sig	0.1209	not_sig
LDL	17	73767437	A	G	rs4485425	28.2892	5.14e-29	0.673	0.0172	0.0014	0.0184	0.0018	9.346e-24	0.0174	0.0021	1.416e-16	0.364114	0.715773	not_sig	0.2604	not_sig
nonHDL	17	73767437	A	G	rs4485425	18.6634	2.17e-19	0.6892	0.017	0.0017	0.0199	0.0024	4.127e-16	0.0162	0.0023	1.289e-12	1.11784	0.263635	not_sig	0.1581	not_sig
TC	17	73767437	A	G	rs4485425	24.5047	3.13e-25	0.6737	0.0156	0.0014	0.0181	0.0018	3.499e-24	0.0137	0.002	1.141e-11	1.64781	0.0993915	not_sig	0.05316	not_sig
HDL	17	74214276	T	C	rs7214563	8.68848	2.05e-09	0.8653	0.0153	0.0022	0.0128	0.0028	4.453e-06	0.0206	0.0033	6.76e-10	-1.81712	0.0691995	not_sig	0.2709	not_sig
logTG	17	74268619	T	C	rs193220	15.1171	7.64e-16	0.6757	0.012	0.0014	0.0111	0.0018	3.081e-10	0.0134	0.002	2.368e-11	-0.859832	0.389882	not_sig	0.1639	not_sig
LDL	17	76387363	T	G	rs11657987	36.1045	7.86e-37	0.522	-0.017	0.0013	-0.0193	0.0017	2.118e-31	-0.0169	0.0019	8.583e-19	-0.94807	0.343094	not_sig	0.1032	not_sig
nonHDL	17	76387363	T	G	rs11657987	11.5479	2.83e-12	0.5258	-0.012	0.0015	-0.0136	0.0021	2.663e-10	-0.0121	0.002	1.683e-09	-0.51946	0.60344	not_sig	0.4563	not_sig
TC	17	76387363	T	G	rs11657987	51.4109	3.88e-52	0.5276	-0.02	0.0012	-0.0202	0.0016	1.647e-38	-0.0214	0.0018	3.328e-34	0.502096	0.6156	not_sig	0.7643	not_sig
HDL	17	76394042	A	G	rs16971107	105.379	4.18e-106	0.4019	-0.029	0.0012	-0.0312	0.0016	1.896e-84	-0.0285	0.0018	8.741e-55	-1.13039	0.25831	not_sig	0.1495	not_sig
logTG	17	76395750	T	C	rs12450500	43.6384	2.3e-44	0.3991	0.0187	0.0013	0.0201	0.0016	6.258e-35	0.0169	0.0019	9.668e-20	1.2958	0.195043	not_sig	0.5235	not_sig
logTG	17	80052073	A	G	rs9905991	11.6535	2.22e-12	0.5216	-0.01	0.0013	-0.0084	0.0017	5.78e-07	-0.012	0.0019	5.51e-10	1.42036	0.155502	not_sig	0.5292	not_sig
TC	17	81011652	T	C	rs12950377	9.10048	7.93e-10	0.1518	0.0116	0.0017	0.0099	0.0021	4.057e-06	0.0126	0.0024	1.905e-07	-0.853132	0.393586	not_sig	0.8408	not_sig
HDL	18	287534	A	G	rs6506032	12.5821	2.62e-13	0.883	-0.018	0.0022	-0.0151	0.0028	5.764e-08	-0.0202	0.0033	1.422e-09	1.18811	0.234789	not_sig	0.3106	not_sig
logTG	18	293519	A	G	rs8083730	10.6648	2.16e-11	0.8836	0.0157	0.0021	0.0162	0.0027	1.884e-09	0.0192	0.0032	2.258e-09	-0.720713	0.471086	not_sig	0.7968	not_sig
logTG	18	2846812	A	T	rs11664106	9.37363	4.23e-10	0.3532	-0.011	0.0015	-0.0088	0.0019	2.336e-06	-0.0136	0.0022	3.267e-10	1.66094	0.096725	not_sig	0.02903	not_sig
HDL	18	2987038	T	C	rs650543	9.80391	1.57e-10	0.292	0.0108	0.0014	0.0118	0.0018	4.957e-11	0.0095	0.002	3.533e-06	0.861874	0.388757	not_sig	0.4431	not_sig
TC	18	2989738	A	G	rs3016593	7.5056	3.12e-08	0.4363	0.008	0.0012	0.0077	0.0016	1.54e-06	0.0072	0.0018	5.039e-05	0.209207	0.834287	not_sig	0.7918	not_sig
LDL	18	9545961	T	C	rs2840354	8.57827	2.64e-09	0.8001	-0.012	0.0016	-0.0106	0.0021	3.811e-07	-0.0132	0.0024	3.305e-08	0.821089	0.411596	not_sig	0.6367	not_sig
TC	18	9545961	T	C	rs2840354	10.1772	6.65e-11	0.8001	-0.012	0.0016	-0.0108	0.002	1.012e-07	-0.0135	0.0023	4.099e-09	0.892618	0.372062	not_sig	0.5943	not_sig
logTG	18	13725674	A	C	rs3809898	11.825	1.5e-12	0.6416	0.0109	0.0013	0.0121	0.0017	2.022e-12	0.0093	0.002	3.062e-06	1.07296	0.283289	not_sig	0.03908	not_sig
logTG	18	19905141	T	C	rs35321365	13.5834	2.61e-14	0.5077	0.0111	0.0013	0.0126	0.0017	5.49e-14	0.0098	0.0019	1.553e-07	1.10473	0.269278	not_sig	0.414	not_sig
HDL	18	20070591	T	C	rs16967814	7.39389	4.04e-08	0.7405	0.0097	0.0015	0.0081	0.0019	1.879e-05	0.0116	0.0022	1.074e-07	-1.21397	0.224761	not_sig	0.44	not_sig
nonHDL	18	21113285	T	C	rs2510344	9.22096	6.01e-10	0.5007	-0.007	0.0015	-0.0075	0.0022	0.0005788	-0.0078	0.002	9.056e-05	0.101332	0.919287	not_sig	0.7692	not_sig
HDL	18	21143739	T	G	rs2960578	19.133	7.36e-20	0.514	0.0133	0.0013	0.014	0.0016	1.597e-17	0.0132	0.0019	2.507e-12	0.324713	0.745398	not_sig	0.3045	not_sig
logTG	18	21143739	T	G	rs2960578	23.3342	4.63e-24	0.5111	-0.014	0.0013	-0.0132	0.0016	6.921e-16	-0.018	0.0019	1.119e-21	1.9437	0.0519311	not_sig	0.06389	not_sig
HDL	18	29772887	T	C	rs150261265	9.48735	3.26e-10	0.0012	-0.187	0.0238	-0.2188	0.0315	3.533e-12	-0.1538	0.0366	2.609e-05	-1.35716	0.17473	not_sig	0.1825	not_sig
logTG	18	29772887	T	C	rs150261265	9.56869	2.7e-10	0.0011	0.1901	0.0239	0.1935	0.0315	7.883e-10	0.1816	0.0366	6.716e-07	0.24788	0.804228	not_sig	0.1033	not_sig
HDL	18	40705900	A	G	rs1518166	13.1462	7.14e-14	0.3868	0.0109	0.0013	0.0107	0.0017	2.115e-10	0.012	0.0019	2.859e-10	-0.514126	0.607164	not_sig	0.944	not_sig
TC	18	42062380	A	C	rs75763843	7.78108	1.66e-08	0.1409	-0.012	0.0018	-0.0106	0.0023	2.758e-06	-0.0139	0.0025	1.978e-08	0.978908	0.327625	not_sig	0.05855	not_sig
logTG	18	42599167	A	G	rs12962548	7.6949	2.02e-08	0.6591	-0.008	0.0013	-0.0113	0.0017	3.293e-11	-0.0049	0.0019	0.01198	-2.52509	0.0115669	not_sig	0.01608	not_sig
HDL	18	45692874	T	C	NA	7.8853	1.3e-08	0.9996	-0.37	0.0523	-0.452	0.0694	7.218e-11	-0.2956	0.0862	0.0006082	-1.42478	0.154222	not_sig	0.04739	not_sig
HDL	18	46545976	C	G	rs538969346	90.3925	4.05e-91	0.9903	-0.153	0.0071	-0.1444	0.0093	3.436e-54	-0.1841	0.0106	1.224e-67	2.83859	0.00453139	not_sig	0.05655	not_sig
LDL	18	46545976	C	G	rs538969346	10.6487	2.25e-11	0.9902	-0.054	0.0072	-0.0655	0.0093	1.739e-12	-0.0422	0.0106	7.098e-05	-1.66407	0.0960985	not_sig	0.01992	not_sig
nonHDL	18	46545976	C	G	rs538969346	8.8973	1.27e-09	0.9907	-0.059	0.0086	-0.0935	0.013	7.317e-13	-0.0469	0.0114	3.811e-05	-2.7066	0.00679755	not_sig	0.009702	not_sig
TC	18	46545976	C	G	rs538969346	59.7191	1.91e-60	0.9903	-0.121	0.0069	-0.127	0.0091	1.176e-44	-0.1268	0.0101	7.531e-36	-0.0148245	0.988172	not_sig	0.3334	not_sig
LDL	18	47109955	A	G	rs77960347	24.4739	3.36e-25	0.0122	0.068	0.006	0.0767	0.0078	1.156e-22	0.0629	0.0089	1.955e-12	1.1744	0.240235	not_sig	0.2491	not_sig
nonHDL	18	47109955	A	G	rs77960347	24.1818	6.58e-25	0.0122	0.0815	0.0072	0.1043	0.0107	1.985e-22	0.0755	0.0096	4.734e-15	2.01199	0.0442214	not_sig	0.02679	not_sig
TC	18	47109955	A	G	rs77960347	175.756	1.75e-176	0.0122	0.1733	0.0058	0.1711	0.0076	2.72e-111	0.1903	0.0086	1.15e-109	-1.68575	0.0918446	not_sig	0.387	not_sig
HDL	18	47181668	A	T	rs2156552	388.681	0	0.8314	0.075	0.0017	0.0729	0.0022	5.09e-246	0.081	0.0024	5.75e-240	-2.50855	0.0121226	not_sig	0.4731	not_sig
TC	18	47632322	T	C	rs143376213	30.7852	1.64e-31	0.01	0.0846	0.0068	0.085	0.0089	1.152e-21	0.096	0.0101	1.603e-21	-0.82339	0.410286	not_sig	0.7687	not_sig
HDL	18	48211367	T	C	rs572456306	13.3923	4.05e-14	0.9978	-0.048	0.0182	-0.0593	0.0265	0.02556	-0.0306	0.0245	0.2123	-0.801839	0.422646	not_sig	0.9881	not_sig
HDL	18	48712504	A	G	rs1053011568	8.19802	6.34e-09	0.0017	0.7553	0.0983	0.8295	0.1556	9.758e-08	0.7734	0.1347	9.242e-09	0.274837	0.783441	not_sig	0.7369	not_sig
HDL	18	50285398	T	C	rs768048	7.70736	1.96e-08	0.8268	0.0123	0.0018	0.0143	0.0023	5.057e-10	0.0083	0.0027	0.00229	1.70557	0.0880879	not_sig	0.058	not_sig
nonHDL	18	55322011	T	C	rs12963741	7.96701	1.08e-08	0.8745	-0.016	0.0024	-0.019	0.0035	7.348e-08	-0.0171	0.0032	9.971e-08	-0.402358	0.687421	not_sig	0.7319	not_sig
LDL	18	55322502	T	C	rs12968116	7.51101	3.08e-08	0.8785	-0.014	0.002	-0.0113	0.0026	1.871e-05	-0.0178	0.003	2.532e-09	1.64895	0.0991571	not_sig	0.1675	not_sig
TC	18	55322502	T	C	rs12968116	14.0846	8.23e-15	0.8786	-0.018	0.002	-0.0161	0.0026	4.242e-10	-0.0199	0.0029	3.608e-12	0.983135	0.325541	not_sig	0.3904	not_sig
logTG	18	56089858	T	G	rs143393480	10.0111	9.75e-11	0.9909	-0.054	0.0071	-0.0516	0.0093	3.057e-08	-0.0623	0.0104	1.951e-09	0.771453	0.440438	not_sig	0.8575	not_sig
HDL	18	56118358	T	C	rs41292412	13.4935	3.21e-14	0.9904	0.0618	0.007	0.0546	0.0093	3.711e-09	0.0772	0.0102	5.008e-14	-1.65088	0.0987623	not_sig	0.7115	not_sig
HDL	18	57829135	T	C	rs6567160	28.3257	4.72e-29	0.2351	-0.019	0.0015	-0.0138	0.0019	8.714e-13	-0.0273	0.0022	1.364e-35	4.68244	2.83485e-06	sig	0.001895	not_sig
logTG	18	57861961	A	G	rs1457489	16.0291	9.35e-17	0.7196	-0.014	0.0014	-0.0128	0.0018	1.347e-12	-0.0161	0.0021	4.937e-15	1.20011	0.230096	not_sig	0.7368	not_sig
HDL	18	60845884	T	C	rs12454712	13.5507	2.81e-14	0.3783	0.0121	0.0013	0.0142	0.0017	1.576e-16	0.0097	0.002	1.289e-06	1.72847	0.0839049	not_sig	0.1973	not_sig
logTG	18	60845884	T	C	rs12454712	21.4796	3.31e-22	0.3792	-0.015	0.0013	-0.0134	0.0017	3.839e-15	-0.0159	0.002	7.419e-16	0.958001	0.338062	not_sig	0.2691	not_sig
LDL	18	61034420	T	G	rs402348	7.47092	3.38e-08	0.2442	-0.01	0.0016	-0.0088	0.002	1.343e-05	-0.0115	0.0023	9.448e-07	0.892135	0.372321	not_sig	0.4293	not_sig
LDL	18	77825981	A	G	rs12454507	7.61394	2.43e-08	0.3357	0.009	0.0014	0.0094	0.0018	3.488e-07	0.0088	0.0021	2.982e-05	0.218468	0.827064	not_sig	0.343	not_sig
[truncated: 288 more rows]
