# Supplementary material for: Implicating genes, pleiotropy, and sexual dimorphism at blood lipid loci through multi-ancestry meta-analysis
Source: Genome Biol. 2022 Dec 27;23:268. doi: 10.1186/s13059-022-02837-1 (PMC9793579; doi:10.1186/s13059-022-02837-1)
Supplement: Supplementary file 25 — Additional file 25: Table S16. Comparison of effect size estimates for sex-stratified analysis in the replication cohorts. [file 13059_2022_2837_MOESM25_ESM.xlsx]

## Sheet: Sheet1
Table S16: Comparison of effect size estimates for sex-stratified analysis in the replication cohorts
Multi-ancestry index variants from the sex-combined analysis with sex-specific effects
Trait	chr	pos	rsID	Ref	Alt	within_cohort_sex_diff_Zscore	within_cohort_sex_diff_pvalue	Replication N	replication_Zscore	replication_pvalue
LDL	1	27021913	rs114165349	C	G	5.137	2.785e-07	134766	1.427	0.1536
nonHDL	1	27021913	rs114165349	C	G	4.685	2.804e-06	33557	0.937	0.3487
TC	1	27021913	rs114165349	C	G	4.367	1.258e-05	134607	1.546	0.122
HDL	1	63050598	rs3850634	T	G	3.928	8.569e-05	188643	0.739	0.4602
LDL	1	109817590	rs12740374	T	G	5.032	4.862e-07	297305	0.467	0.6403
nonHDL	1	109817590	rs12740374	T	G	6.142	8.126e-10	171539	2.099	0.0358
TC	1	109817590	rs12740374	T	G	5.016	5.286e-07	283379	0.987	0.3237
HDL	1	154555733	rs9616	A	T	-4.11	3.949e-05	204696	-1.08	0.2802
HDL	1	234852760	rs553427	T	C	-4.271	1.943e-05	215472	-1.115	0.2646
nonHDL	2	44074431	rs4245791	T	C	-4.184	2.867e-05	39081	-1.943	0.05202
TC	2	44074431	rs4245791	T	C	-4.211	2.539e-05	150919	-1.766	0.0774
HDL	2	48962291	rs17326656	T	G	-7.078	1.462e-12	285227	-2.207	0.02733
logTG	2	48962291	rs17326656	T	G	6.067	1.301e-09	311120	1.657	0.09757
TC	2	113841030	rs6734238	A	G	3.978	6.949e-05	283578	3.134	0.001725
LDL	2	165508389	rs10184004	T	C	-4.443	8.888e-06	297504	-2.042	0.04112
nonHDL	2	165508389	rs10184004	T	C	-4.393	1.12e-05	171738	-1.713	0.0868
HDL	2	165518799	rs75265117	C	G	-4.092	4.28e-05	215472	0.814	0.4154
logTG	2	227094758	rs2203452	A	G	4.946	7.589e-07	311120	1.341	0.1799
HDL	2	227101309	rs2972145	T	C	-4.915	8.859e-07	285227	-0.292	0.77
LDL	3	122285218	rs68028452	CT	C	-4.413	1.018e-05	286728	0.871	0.3839
TC	3	122285218	rs68028452	CT	C	-4.197	2.704e-05	272802	1.216	0.2239
LDL	4	69491284	rs4860987	A	T	7.847	4.247e-15	218437	-0.147	0.8829
nonHDL	4	69491284	rs4860987	A	T	8.716	2.871e-18	170508	0.238	0.8115
TC	4	69491284	rs4860987	A	T	10.221	1.59e-24	204698	-0.18	0.857
nonHDL	4	100239319	rs1229984	T	C	4.35	1.36e-05	167444	0.623	0.5331
HDL	5	53276301	rs1664781	A	G	4.483	7.363e-06	285227	-0.185	0.8534
HDL	5	118729327	rs1045242	A	G	-6.279	3.413e-10	285227	-2.902	0.003702
logTG	5	118729327	rs1045242	A	G	6.288	3.218e-10	311120	3.49	0.0004831
HDL	6	127437617	rs2800708	T	C	-3.944	8.007e-05	285227	-1.472	0.1411
nonHDL	6	127439897	rs141783576	C	G	6.61	3.856e-11	47982	-0.474	0.6355
logTG	6	127440047	rs577721086	T	C	-8.048	8.382e-16	176752	-1.66	0.09693
HDL	6	135428537	rs7758845	A	C	-4.09	4.307e-05	285227	-0.056	0.9554
LDL	6	139831981	rs635769	T	C	4.257	2.069e-05	297504	2.782	0.005397
nonHDL	6	139835329	rs2982521	A	T	3.844	0.0001213	171738	1.544	0.1226
logTG	6	139835498	rs17585887	T	C	4.529	5.93e-06	311120	4.107	4.005e-05
TC	6	161005610	rs55730499	T	C	6.674	2.485e-11	150268	0.267	0.7892
LDL	6	161010118	rs10455872	A	G	-5.4	6.675e-08	169507	-0.738	0.4605
nonHDL	6	161010118	rs10455872	A	G	-6.308	2.835e-10	52276	-0.829	0.4071
HDL	7	130429186	rs13234269	A	T	8.418	3.819e-17	215472	6.045	1.49e-09
logTG	7	130429186	rs13234269	A	T	-8.931	4.208e-19	241511	-3.812	0.0001378
nonHDL	7	130432538	rs13241165	A	T	5.61	2.026e-08	171738	3.758	0.0001712
HDL	8	19823648	rs3208305	A	T	7.519	5.537e-14	285227	4.633	3.607e-06
HDL	8	116597635	rs3808460	T	C	-3.994	6.489e-05	285227	-1.026	0.305
logTG	8	126500031	rs28601761	C	G	-5.162	2.447e-07	292424	-1.545	0.1224
nonHDL	8	126500031	rs28601761	C	G	-5.025	5.029e-07	171738	-0.793	0.4279
TC	8	126500031	rs28601761	C	G	-4.856	1.195e-06	264875	-0.9	0.3679
HDL	9	136141870	rs2519093	T	C	5.132	2.861e-07	285227	1.69	0.09096
HDL	10	64988931	rs7916868	A	T	-6.538	6.217e-11	285227	-2.989	0.002795
TC	10	113934384	rs2803619	C	G	-4.098	4.17e-05	272802	-0.792	0.4284
HDL	11	14865399	NA	T	C	3.934	8.362e-05	5707	-0.657	0.511
TC	11	61588305	rs174564	A	G	5.305	1.128e-07	279309	2.714	0.006649
HDL	11	116648917	rs964184	C	G	-7.171	7.444e-13	285227	-2.553	0.01069
LDL	11	116648917	rs964184	C	G	-8.703	3.232e-18	297504	-5.814	6.11e-09
logTG	11	116648917	rs964184	C	G	4.817	1.46e-06	311120	2.492	0.01271
TC	12	109152649	rs4964275	T	C	3.925	8.663e-05	283578	1.463	0.1435
LDL	12	121416650	rs1169288	A	C	-4.724	2.311e-06	297504	-0.799	0.4241
TC	12	121416650	rs1169288	A	C	-4.451	8.549e-06	283578	-0.701	0.4833
nonHDL	12	121416988	rs2244608	A	G	-4.18	2.921e-05	171738	-0.117	0.9072
HDL	12	122963550	rs12369179	T	C	-4.811	1.504e-06	137483	0.622	0.5341
logTG	12	123203258	rs488635	T	G	6.156	7.441e-10	311120	0.134	0.8932
HDL	12	123804721	rs12366872	C	G	-4.015	5.943e-05	285227	-2.271	0.02316
nonHDL	12	124409502	rs7133378	A	G	-5.909	3.436e-09	171738	0.254	0.7994
logTG	12	124492610	rs12303671	T	G	5.501	3.77e-08	311120	-0.135	0.8927
HDL	14	105258437	rs2494747	T	G	-4.254	2.104e-05	215472	-0.227	0.8206
logTG	15	44027885	rs139974673	T	C	-4.387	1.147e-05	254058	-0.135	0.8924
logTG	15	58723426	rs1077835	A	G	-6.142	8.164e-10	311120	-3.347	0.0008167
nonHDL	15	58723426	rs1077835	A	G	4.217	2.473e-05	171738	0.078	0.9377
LDL	16	56990716	rs247617	A	C	-11.315	1.102e-29	297504	-5.361	8.272e-08
nonHDL	16	56991363	rs183130	T	C	-7.83	4.889e-15	171738	-4.113	3.905e-05
TC	16	56991363	rs183130	T	C	-3.93	8.486e-05	283578	-3.324	0.0008876
nonHDL	16	81524274	rs12443634	A	C	5.558	2.73e-08	171738	-0.429	0.668
HDL	16	81534790	rs2925979	T	C	-11.26	2.079e-29	285227	-5.549	2.865e-08
logTG	16	81534790	rs2925979	T	C	11.491	1.46e-30	311120	3.807	0.0001405
HDL	17	41926126	rs72836561	T	C	4.291	1.778e-05	150678	0.39	0.6965
TC	17	45650196	rs12603290	T	C	4.668	3.047e-06	195353	1.891	0.05857
nonHDL	17	45653291	rs8077106	T	G	4.675	2.932e-06	171738	1.526	0.1271
LDL	17	45732605	rs11870935	A	G	-4.431	9.378e-06	196622	-1.445	0.1484
HDL	19	8429323	rs116843064	A	G	-7.207	5.705e-13	150678	-0.466	0.6415
LDL	19	11197598	rs73015024	T	G	-5.276	1.321e-07	296337	-1.058	0.29
nonHDL	19	11197598	rs73015024	T	G	-4.261	2.033e-05	156081	0.903	0.3667
TC	19	11197598	rs73015024	T	G	-4.926	8.399e-07	267915	-1.38	0.1674
TC	19	18520231	rs11086110	A	G	3.971	7.143e-05	283578	-0.72	0.4713
LDL	19	19379549	rs58542926	T	C	14.047	8.007e-45	297504	1.921	0.0547
logTG	19	19379549	rs58542926	T	C	6.274	3.508e-10	311120	2.809	0.004976
nonHDL	19	19379549	rs58542926	T	C	16.255	2.066e-59	171738	1.733	0.0831
TC	19	19379549	rs58542926	T	C	14.734	3.872e-49	283578	2.664	0.007718
HDL	19	45411941	rs429358	T	C	-7.594	3.096e-14	285227	-2.276	0.02283
LDL	19	45412079	rs7412	T	C	-23.986	3.89e-127	297504	-10.212	1.758e-24
nonHDL	19	45412079	rs7412	T	C	-22.431	1.95e-111	171738	-9.133	6.67e-20
TC	19	45412079	rs7412	T	C	-24.564	3.06e-133	283578	-10.856	1.868e-27
logTG	19	45416178	rs483082	T	G	-9.844	7.274e-23	311120	-1.319	0.1873
HDL	20	44551855	rs6073958	T	C	7.44	1.006e-13	285227	3.037	0.002387
