# Supplementary material for: Implicating genes, pleiotropy, and sexual dimorphism at blood lipid loci through multi-ancestry meta-analysis
Source: Genome Biol. 2022 Dec 27;23:268. doi: 10.1186/s13059-022-02837-1 (PMC9793579; doi:10.1186/s13059-022-02837-1)
Supplement: Supplementary file 26 — Additional file 26: Figure S10. Comparison of effect sizes for trans-ancestry index variants excluding cholesterol-lowering medication. [file 13059_2022_2837_MOESM26_ESM.pdf]

**A. Females (all index variants)**

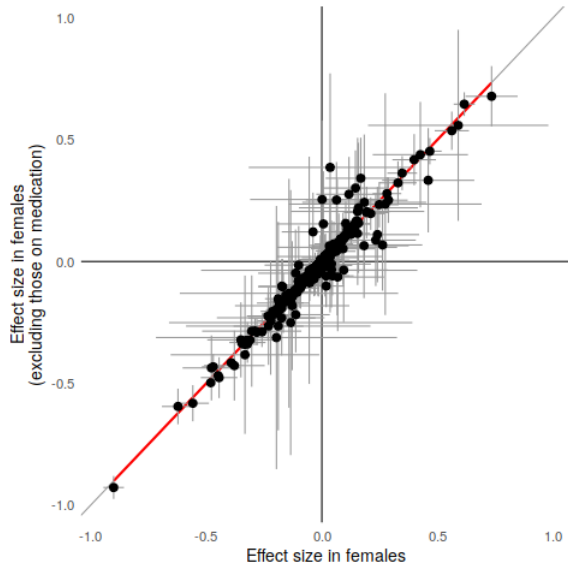

**B. Females (only variants with significant difference by sex)**

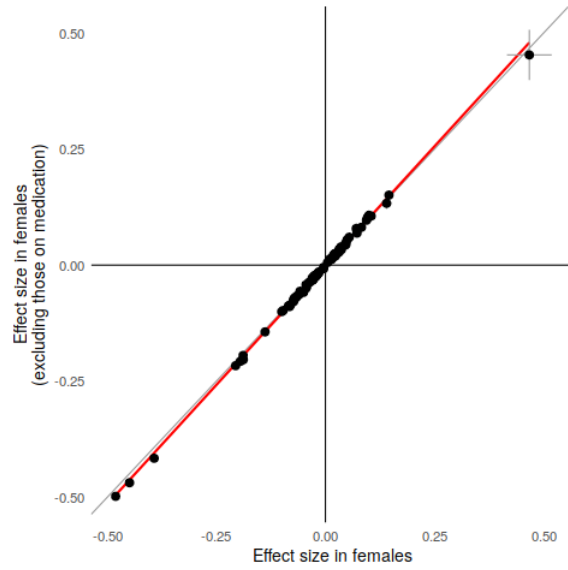

**C. Males (all index variants)**

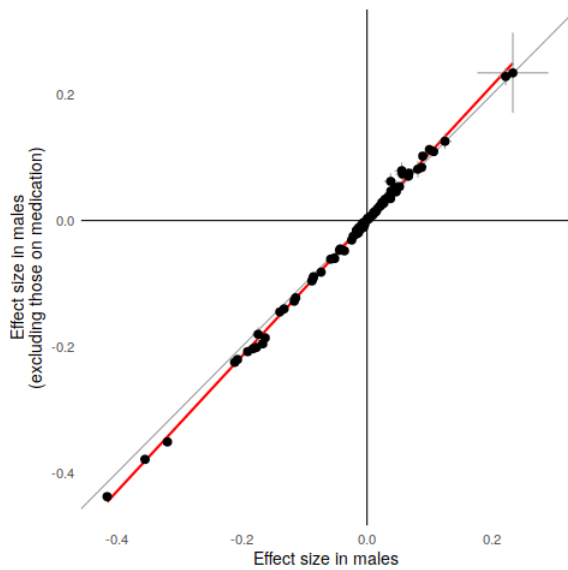

**D. Males (only variants with significant difference by sex)**

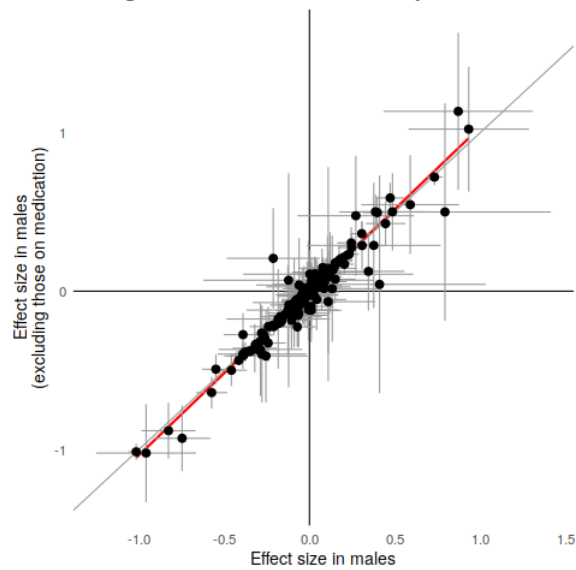

**Figure S10. Comparison of effect sizes for trans-ancestry index variants excluding cholesterol-lowering medication.** Grey lines show the  $y=x$  diagonal while red lines are from linear regression. Effect sizes were slightly larger after excluding individuals on cholesterol-lowering medication.
