# Supplementary material for: Implicating genes, pleiotropy, and sexual dimorphism at blood lipid loci through multi-ancestry meta-analysis
Source: Genome Biol. 2022 Dec 27;23:268. doi: 10.1186/s13059-022-02837-1 (PMC9793579; doi:10.1186/s13059-022-02837-1)
Supplement: Supplementary file 27 — Additional file 27: Table S17. Sex-stratified effect sizes in UK Biobank considering all individuals or only those not on cholesterol lowering medications. [file 13059_2022_2837_MOESM27_ESM.xlsx]

## Sheet: Sheet1
Table S17. Sex-stratified effect sizes in UK Biobank considering all individuals or only those not on cholesterol lowering medications
trait	chr	pos	Ref	Alt	P-value for sex difference within cohort	sig_diff_within_cohort	men_Effect	men_SE	women_Effect	women_SE	p_diff	sig_diff_within_UKB	men_no_meds_Effect	men_no_meds_SE	women_no_meds_Effect	women_no_meds_SE	p_diff_no_meds	sig_diff_within_UKB_no_meds
HDL	1	914852	G	C	0.9928	not_sig	-0.00993862	0.00342327	-0.00925852	0.00316617	0.883719	not_sig	-0.0100145	0.00393379	-0.0102742	0.00340546	0.960093	not_sig
HDL	1	1831012	C	T	0.8104	not_sig	-0.00584415	0.00335333	-0.0100468	0.00310756	0.356638	not_sig	-0.00741448	0.00385176	-0.00938217	0.00333994	0.698739	not_sig
logTG	1	2147162	T	C	0.05547	not_sig	0.0118522	0.00388562	0.00525782	0.00356086	0.209599	not_sig	0.0144018	0.00444728	0.00588847	0.00382118	0.145413	not_sig
LDL	1	2326009	G	A	0.01569	not_sig	-0.00553089	0.00327071	-0.0102286	0.00296743	0.286121	not_sig	-0.00730536	0.0037295	-0.0109873	0.00316208	0.450202	not_sig
HDL	1	2975119	C	G	0.6176	not_sig	-0.00443938	0.00437349	-0.0133001	0.00405042	0.136072	not_sig	-0.00649898	0.00502848	-0.0116449	0.00435394	0.437879	not_sig
TC	1	10796866	T	C	0.2348	not_sig	-0.0153592	0.00346453	-0.00865003	0.00315882	0.151294	not_sig	-0.014741	0.00393801	-0.00983485	0.00336	0.341932	not_sig
HDL	1	12518739	A	G	0.1834	not_sig	0.0314372	0.018206	0.0714729	0.0167112	0.104263	not_sig	0.0414835	0.0209687	0.0780174	0.0179988	0.184942	not_sig
LDL	1	15914648	G	A	0.3377	not_sig	0.0102282	0.00350358	0.00522318	0.00318358	0.28906	not_sig	0.0118688	0.00400035	0.00499531	0.00339722	0.189093	not_sig
TC	1	15914648	G	A	0.0606	not_sig	0.00923111	0.00351503	0.00411529	0.0032118	0.281298	not_sig	0.0109309	0.0039981	0.00469689	0.00341782	0.234655	not_sig
logTG	1	16508059	G	A	0.9569	not_sig	0.00616458	0.00336536	0.0116914	0.0030884	0.225001	not_sig	0.0071771	0.0038496	0.0132479	0.0033148	0.230796	not_sig
LDL	1	16510894	C	T	0.5547	not_sig	0.0118369	0.00329069	0.0171921	0.00299761	0.227667	not_sig	0.0122561	0.00375197	0.017223	0.00319476	0.312157	not_sig
nonHDL	1	16510894	C	T	0.7476	not_sig	0.0124942	0.0034388	0.017452	0.00315793	0.286948	not_sig	0.0132349	0.00390973	0.0183053	0.0033633	0.324202	not_sig
TC	1	16510894	C	T	0.2281	not_sig	0.00999834	0.00330168	0.0173159	0.00302437	0.10125	not_sig	0.0106585	0.00375022	0.0183534	0.00321426	0.118237	not_sig
TC	1	18802825	G	A	0.02192	not_sig	-0.00841273	0.00336871	-0.0068488	0.00308034	0.731176	not_sig	-0.00895604	0.00382953	-0.00764705	0.00327264	0.794426	not_sig
LDL	1	18808526	A	C	0.2648	not_sig	-0.0100318	0.00336075	-0.00566119	0.00305493	0.334553	not_sig	-0.010549	0.00383435	-0.00619601	0.00325469	0.385464	not_sig
HDL	1	20916080	C	G	0.9223	not_sig	-0.0107002	0.00353412	-0.00665017	0.00327226	0.399105	not_sig	-0.0105906	0.00405933	-0.00490628	0.00352145	0.288836	not_sig
HDL	1	23734350	A	C	0.9786	not_sig	0.0214912	0.0058522	0.0129159	0.0053724	0.279063	not_sig	0.023902	0.00671171	0.0167903	0.00577453	0.420569	not_sig
logTG	1	23747996	GA	G	0.284	not_sig	0.00997146	0.00371698	0.0107118	0.00339316	0.882725	not_sig	0.00995324	0.00425074	0.0103912	0.00364059	0.937458	not_sig
TC	1	23769359	T	C	0.4459	not_sig	0.0221258	0.00476357	0.0183769	0.00434388	0.559809	not_sig	0.0242676	0.00539976	0.0184457	0.00461783	0.411275	not_sig
LDL	1	23784965	A	G	0.6023	not_sig	0.0197053	0.00490998	0.0150872	0.00444972	0.484641	not_sig	0.0221938	0.00558481	0.0161927	0.00474325	0.411494	not_sig
nonHDL	1	23785760	C	T	0.1327	not_sig	0.0223729	0.00513997	0.0150311	0.0046961	0.290312	not_sig	0.0243855	0.00582899	0.0153725	0.00500178	0.23933	not_sig
HDL	1	25049949	A	G	0.2362	not_sig	-0.0100115	0.00387194	-0.0100812	0.00356657	0.989408	not_sig	-0.0128597	0.00445772	-0.00942254	0.00383661	0.557867	not_sig
TC	1	25760920	C	T	0.08971	not_sig	0.0276058	0.00328498	0.0220219	0.00300121	0.208233	not_sig	0.029804	0.00373519	0.0223062	0.00318885	0.125803	not_sig
nonHDL	1	25764177	A	G	0.00646	not_sig	0.026147	0.00342071	0.0203108	0.00313376	0.207122	not_sig	0.0277676	0.00389364	0.0206822	0.00333678	0.16588	not_sig
LDL	1	25768937	A	G	0.1027	not_sig	0.0267506	0.00327073	0.0207031	0.00297099	0.169939	not_sig	0.0296954	0.00373316	0.0209436	0.00316546	0.0729774	not_sig
logTG	1	26232356	C	A	0.3097	not_sig	0.00931483	0.00333064	0.00490448	0.00303853	0.326614	not_sig	0.00984999	0.00380919	0.0059509	0.00325922	0.435451	not_sig
LDL	1	26512556	C	T	0.7209	not_sig	0.0116285	0.0096778	0.0268852	0.00874838	0.240915	not_sig	0.0162118	0.0110881	0.0307992	0.00936859	0.313613	not_sig
nonHDL	1	26512556	C	T	0.254	not_sig	0.00778736	0.0101221	0.0283447	0.00923323	0.132424	not_sig	0.0153612	0.0115681	0.0296866	0.00988683	0.345188	not_sig
LDL	1	27021913	G	C	2.79e-07	sig	0.0565	0.0108531	0.0962932	0.00979186	0.0063555	not_sig	0.0735752	0.0125383	0.102	0.0105623	0.0867	not_sig
logTG	1	27021913	G	C	0.002522	not_sig	0.0683991	0.0109205	0.086159	0.00990829	0.227141	not_sig	0.077289	0.0126566	0.0875	0.0107631	0.539	not_sig
nonHDL	1	27021913	G	C	2.8e-06	sig	0.0555	0.0113435	0.0998544	0.0103292	0.00373774	not_sig	0.0789024	0.013092	0.107	0.0111366	0.0994	not_sig
TC	1	27021913	G	C	1.26e-05	sig	0.0378	0.0108941	0.0707468	0.00987925	0.024801	not_sig	0.0619452	0.012538	0.0789	0.0106288	0.3	not_sig
HDL	1	27180088	A	C	0.2209	not_sig	-0.07254	0.0112369	-0.0813538	0.010324	0.562458	not_sig	-0.0619392	0.0130885	-0.0796654	0.0112289	0.302672	not_sig
LDL	1	27668610	C	T	0.03153	not_sig	0.0245019	0.00856442	0.0379035	0.00774974	0.244627	not_sig	0.0306328	0.00983792	0.0411802	0.00830691	0.411418	not_sig
logTG	1	27688814	C	T	0.1304	not_sig	0.0172051	0.00868788	0.0266865	0.00791072	0.418417	not_sig	0.0189206	0.0100103	0.0260618	0.00853646	0.586228	not_sig
nonHDL	1	27688814	C	T	0.002498	not_sig	0.0251836	0.00902879	0.0369778	0.00823247	0.33307	not_sig	0.0322963	0.0103424	0.0401223	0.00881605	0.563634	not_sig
TC	1	27688814	C	T	0.05999	not_sig	0.019576	0.00866577	0.0279636	0.00788842	0.472916	not_sig	0.0267737	0.00991481	0.0298443	0.00842898	0.812963	not_sig
HDL	1	28319484	A	G	0.004164	not_sig	-0.00897482	0.00364043	-0.0104135	0.00336178	0.77095	not_sig	-0.0106466	0.0041765	-0.0117007	0.00361306	0.848212	not_sig
TC	1	28319484	A	G	0.08643	not_sig	-0.00664942	0.00354819	-0.0119326	0.00323963	0.270189	not_sig	-0.00797283	0.00402571	-0.0131827	0.00344205	0.323971	not_sig
logTG	1	36021738	T	C	0.6525	not_sig	0.0211321	0.0105304	0.000191883	0.0097044	0.142551	not_sig	0.0149949	0.0120856	0.00171541	0.0104438	0.40447	not_sig
logTG	1	39312160	G	A	0.0005113	not_sig	0.0104903	0.00451594	0.0157735	0.00413704	0.387023	not_sig	0.00993435	0.00515732	0.0135662	0.00444703	0.5928	not_sig
HDL	1	39438889	T	C	0.02076	not_sig	-0.00462807	0.00355465	-0.0102553	0.00327846	0.243244	not_sig	-0.00286346	0.00408353	-0.0123046	0.00352422	0.0792389	not_sig
TC	1	39451488	A	G	0.06818	not_sig	-0.00586087	0.00329997	-0.00797544	0.0030178	0.635373	not_sig	-0.00622703	0.00375266	-0.00809303	0.00320933	0.704735	not_sig
HDL	1	40035928	G	T	0.2946	not_sig	-0.0409423	0.00420979	-0.0359864	0.00388393	0.385588	not_sig	-0.0409351	0.00484732	-0.0370462	0.00418018	0.542369	not_sig
logTG	1	40035928	G	T	0.3696	not_sig	0.0199515	0.00411826	0.0219794	0.0037551	0.71521	not_sig	0.0188846	0.00471958	0.0210353	0.00403523	0.728359	not_sig
TC	1	45494828	C	G	0.3612	not_sig	0.0100303	0.00370901	0.00623985	0.00337836	0.448686	not_sig	0.0122521	0.00421282	0.00777704	0.0035915	0.417601	not_sig
LDL	1	45810865	G	A	0.2393	not_sig	-0.0134329	0.00594642	-0.016781	0.00540476	0.676087	not_sig	-0.018886	0.00676991	-0.0198646	0.00575201	0.912042	not_sig
nonHDL	1	49204135	G	A	0.892	not_sig	-0.00584426	0.247045	0.0664994	0.259218	0.839456	not_sig	0.027002	0.292006	0.0580481	0.279269	0.938584	not_sig
LDL	1	49263479	G	A	0.1674	not_sig	0.121019	0.222125	0.460379	0.199416	0.254286	not_sig	0.120534	0.252035	0.333391	0.214156	0.518696	not_sig
logTG	1	51209148	T	C	0.8611	not_sig	-0.0223459	0.00579934	-0.0209201	0.00528551	0.855408	not_sig	-0.0187063	0.00661456	-0.0232827	0.00567066	0.598397	not_sig
LDL	1	52262405	A	G	0.1508	not_sig	-0.00552965	0.172442	-0.173727	0.145724	0.455039	not_sig	-0.118607	0.193991	-0.232264	0.154028	0.645456	not_sig
nonHDL	1	52262405	A	G	0.2519	not_sig	0.0105311	0.176995	-0.230941	0.151027	0.298028	not_sig	-0.121032	0.199413	-0.265558	0.159169	0.57005	not_sig
TC	1	52262405	A	G	0.2505	not_sig	0.0423082	0.173195	-0.112862	0.147145	0.493564	not_sig	-0.0526028	0.194112	-0.218531	0.155101	0.5031	not_sig
LDL	1	54246772	T	C	0.9891	not_sig	-0.0675285	0.175121	0.262577	0.172179	0.177695	not_sig	-0.152632	0.204009	0.0676092	0.18746	0.425375	not_sig
nonHDL	1	54246772	T	C	0.4453	not_sig	-0.0628553	0.183986	0.240554	0.180304	0.237569	not_sig	-0.138958	0.210448	0.110318	0.196075	0.384822	not_sig
TC	1	54246772	T	C	0.8036	not_sig	-0.104898	0.175886	0.233265	0.173333	0.169686	not_sig	-0.161841	0.204136	0.087411	0.188087	0.367881	not_sig
LDL	1	54824117	G	A	0.8056	not_sig	0.00513268	0.0298035	0.0217522	0.027215	0.679661	not_sig	-0.00159023	0.0340537	0.0110851	0.0288324	0.775758	not_sig
nonHDL	1	54824117	G	A	0.6398	not_sig	0.00908473	0.0311532	0.027826	0.0289265	0.658439	not_sig	0.00686362	0.0354684	0.0174571	0.0306275	0.820674	not_sig
logTG	1	54890956	T	G	0.1656	not_sig	0.0115162	0.00330381	0.0135628	0.00301652	0.646436	not_sig	0.0110667	0.00377896	0.0128474	0.00323948	0.71979	not_sig
LDL	1	55505647	G	T	0.1529	not_sig	-0.387711	0.0123417	-0.334739	0.0112564	0.00147262	not_sig	-0.407135	0.0134545	-0.34011	0.0118015	0.000173053	not_sig
nonHDL	1	55505647	G	T	0.4656	not_sig	-0.358726	0.0128813	-0.318115	0.0118938	0.0201938	not_sig	-0.381967	0.0140126	-0.325318	0.0124581	0.00244828	not_sig
TC	1	55505647	G	T	0.6051	not_sig	-0.344127	0.0123859	-0.311232	0.0113556	0.0496422	not_sig	-0.379361	0.0134529	-0.322743	0.0118716	0.00155446	not_sig
nonHDL	1	56105434	C	G	0.2013	not_sig	0.0736129	0.13606	-0.167015	0.114108	0.174214	not_sig	0.118928	0.149895	-0.170906	0.122792	0.133652	not_sig
LDL	1	56840574	A	C	0.6498	not_sig	0.151172	0.120875	0.0137669	0.117811	0.414319	not_sig	0.075402	0.139972	-0.016328	0.127491	0.627082	not_sig
nonHDL	1	56840574	A	C	0.8727	not_sig	0.0898827	0.127601	0.0341166	0.121305	0.750769	not_sig	0.060336	0.144707	0.0160404	0.130671	0.81979	not_sig
TC	1	56840574	A	C	0.5059	not_sig	0.0717443	0.121409	0.0186909	0.11896	0.754286	not_sig	0.0258355	0.14006	-0.0594641	0.128379	0.652565	not_sig
HDL	1	56983585	G	A	0.03651	not_sig	-0.0145895	0.00512439	-0.00555888	0.00473142	0.19416	not_sig	-0.0109048	0.00591241	-0.00462168	0.0051041	0.419881	not_sig
nonHDL	1	57851746	G	A	0.06753	not_sig	-0.00512325	0.0124069	-0.00294969	0.0113103	0.896704	not_sig	0.00016203	0.0140902	-0.00554124	0.0120596	0.757809	not_sig
LDL	1	57872099	T	C	0.04258	not_sig	0.0291564	0.0936479	-0.0291334	0.0821335	0.638894	not_sig	0.105955	0.106447	-0.0516103	0.0879715	0.252577	not_sig
TC	1	57872099	T	C	0.02487	not_sig	0.012181	0.0940577	-0.0172706	0.0829329	0.813811	not_sig	0.0682261	0.106514	-0.0517108	0.0885824	0.385332	not_sig
logTG	1	61684630	G	A	0.01191	not_sig	-0.0276525	0.00616348	-0.00986913	0.00564305	0.0328458	not_sig	-0.0303373	0.0070251	-0.0110654	0.00605186	0.0371481	not_sig
nonHDL	1	61684630	G	A	0.2883	not_sig	-0.0244939	0.00639956	-0.00828111	0.00586879	0.0611616	not_sig	-0.0286615	0.00725086	-0.00958286	0.00624612	0.0456051	not_sig
TC	1	61692655	T	C	0.1262	not_sig	-0.0146604	0.00615827	-0.00311284	0.00563945	0.165526	not_sig	-0.0181763	0.00697061	-0.00408489	0.0059883	0.124141	not_sig
LDL	1	61865627	C	T	0.7393	not_sig	-0.0161944	0.00399106	-0.00675279	0.0036283	0.0792073	not_sig	-0.0172045	0.00454465	-0.00510092	0.00386854	0.0419943	not_sig
LDL	1	62920008	A	G	0.01078	not_sig	-0.0395424	0.00340091	-0.0426835	0.00309107	0.493108	not_sig	-0.0432546	0.00386975	-0.0448	0.00328924	0.765	not_sig
logTG	1	62920008	A	G	0.0001637	not_sig	-0.0701737	0.00342028	-0.0561329	0.00312772	0.00238263	not_sig	-0.0732481	0.00390468	-0.0577	0.00335177	0.00251	not_sig
nonHDL	1	62920008	A	G	0.9735	not_sig	-0.0534303	0.00355422	-0.0494202	0.00325751	0.40424	not_sig	-0.0580132	0.00403372	-0.0511422	0.00346361	0.195013	not_sig
HDL	1	63050598	T	G	8.57e-05	sig	-0.00597	0.00349639	-0.0155045	0.0032342	0.0446828	not_sig	-0.00356976	0.00400957	-0.0170379	0.00347101	0.0108785	not_sig
TC	1	63107526	C	T	0.00923	not_sig	-0.0510396	0.00340976	-0.0546911	0.00311702	0.42802	not_sig	-0.0556392	0.00386557	-0.0568	0.00330781	0.824	not_sig
logTG	1	63433116	G	A	0.1114	not_sig	-0.388667	0.0524032	-0.289361	0.0472415	0.158124	not_sig	-0.394766	0.0591101	-0.285361	0.0500258	0.156575	not_sig
nonHDL	1	63433116	G	A	0.1308	not_sig	-0.375785	0.0546983	-0.209374	0.0494912	0.0236852	not_sig	-0.383949	0.0612012	-0.213538	0.0520714	0.0334591	not_sig
LDL	1	63679932	A	C	0.7886	not_sig	-0.457751	0.0906939	-0.322049	0.0785773	0.256805	not_sig	-0.499829	0.100329	-0.332645	0.0835663	0.199181	not_sig
TC	1	63679932	A	C	0.7595	not_sig	-0.573375	0.0910909	-0.444869	0.0790776	0.285405	not_sig	-0.640856	0.100392	-0.477068	0.0838276	0.209211	not_sig
logTG	1	64576995	C	T	0.3071	not_sig	0.0152412	0.0433319	0.0154768	0.0403998	0.996818	not_sig	-0.00137368	0.0509693	0.0164465	0.0433564	0.789438	not_sig
HDL	1	66098653	T	C	0.01299	not_sig	0.00948141	0.00346257	0.0115025	0.00320261	0.66741	not_sig	0.0113945	0.00397382	0.0123565	0.0034461	0.854484	not_sig
LDL	1	66130398	A	G	0.3167	not_sig	0.00865059	0.00326749	0.00625764	0.00297531	0.587134	not_sig	0.00916795	0.00372242	0.00640836	0.00317335	0.571589	not_sig
TC	1	66133443	A	T	0.03974	not_sig	0.0103113	0.00327795	0.00964888	0.00300142	0.881201	not_sig	0.0113049	0.00372016	0.0105842	0.00319234	0.882785	not_sig
logTG	1	71397835	A	G	0.2611	not_sig	-0.00547104	0.00328468	-0.0107336	0.00299853	0.235407	not_sig	-0.00548513	0.00375759	-0.0107849	0.00322216	0.28299	not_sig
HDL	1	71428732	A	C	0.1579	not_sig	0.00474904	0.00344089	0.0105615	0.00318149	0.213597	not_sig	0.00654156	0.00395161	0.00983926	0.00342389	0.527098	not_sig
HDL	1	72754788	T	C	0.3807	not_sig	-0.0102905	0.00423347	-0.0109357	0.00391675	0.910677	not_sig	-0.00763478	0.00485279	-0.0133928	0.00421175	0.368877	not_sig
logTG	1	72835410	C	T	0.6863	not_sig	0.0130607	0.00409876	0.00871612	0.00374379	0.432571	not_sig	0.0123329	0.00467756	0.00866845	0.00402001	0.551327	not_sig
nonHDL	1	78070458	C	T	0.7368	not_sig	-0.0102628	0.00416983	-0.00495974	0.00382332	0.347228	not_sig	-0.0147172	0.00474375	-0.00583654	0.00407536	0.154471	not_sig
HDL	1	85721911	T	C	0.7728	not_sig	-0.00761164	0.00334219	-0.00797967	0.00309261	0.935405	not_sig	-0.00851032	0.00383942	-0.00722767	0.0033284	0.800174	not_sig
logTG	1	91533297	A	G	0.5082	not_sig	-0.0110283	0.00411768	-0.00781573	0.00374995	0.562972	not_sig	-0.0087224	0.00469837	-0.00804636	0.00402469	0.912745	not_sig
nonHDL	1	91533297	A	G	0.02546	not_sig	-0.0114794	0.00427587	-0.0118658	0.00390471	0.946643	not_sig	-0.00863416	0.0048508	-0.0126553	0.00415789	0.527964	not_sig
TC	1	91533297	A	G	0.001245	not_sig	-0.0111944	0.004108	-0.0122557	0.00373945	0.848063	not_sig	-0.0085915	0.00465423	-0.0131231	0.00397397	0.457786	not_sig
nonHDL	1	92946479	G	A	0.6891	not_sig	0.0180825	0.00420685	0.0111924	0.00385382	0.225886	not_sig	0.0230749	0.00478639	0.0103501	0.00411017	0.0431265	not_sig
LDL	1	92971951	T	C	0.6698	not_sig	0.0182903	0.00400799	0.0125455	0.00364357	0.287539	not_sig	0.023825	0.00457276	0.0125878	0.00388877	0.0604967	not_sig
TC	1	93130268	C	T	0.09196	not_sig	0.012659	0.00338352	0.0133503	0.00308618	0.879696	not_sig	0.0155926	0.00384554	0.0143708	0.00328222	0.808518	not_sig
logTG	1	93850283	C	A	0.5398	not_sig	0.0114654	0.00333646	0.00914264	0.00304956	0.606355	not_sig	0.00882994	0.00382022	0.0111276	0.00327164	0.646905	not_sig
HDL	1	93860625	G	A	0.3847	not_sig	-0.0166889	0.0034619	-0.0187797	0.00319983	0.656506	not_sig	-0.0164647	0.00398137	-0.0195661	0.00343818	0.554396	not_sig
logTG	1	98395881	G	T	0.02402	not_sig	-0.0184575	0.0043885	-0.0151719	0.00402445	0.58005	not_sig	-0.019722	0.00502766	-0.015878	0.00432495	0.561101	not_sig
nonHDL	1	107551018	CA	C	0.03702	not_sig	-0.00577266	0.00359644	-0.0152511	0.00329267	0.0512649	not_sig	-0.00531272	0.00409335	-0.0152415	0.00350805	0.0647736	not_sig
LDL	1	107607037	T	G	0.03627	not_sig	-0.00934392	0.00344874	-0.0140274	0.00313486	0.313606	not_sig	-0.0105049	0.00393706	-0.0148368	0.00334421	0.400415	not_sig
LDL	1	109310728	G	A	0.002612	not_sig	-0.0550755	0.0121647	-0.0204234	0.0112028	0.0356231	not_sig	-0.05989	0.0137624	-0.0178712	0.0119056	0.0205913	not_sig
TC	1	109310728	G	A	0.01998	not_sig	-0.0427775	0.0122042	-0.013036	0.0113023	0.0729779	not_sig	-0.0533799	0.0137553	-0.0125972	0.0119804	0.0249666	not_sig
logTG	1	109817192	A	G	0.3169	not_sig	-0.00910158	0.00392718	-0.0107776	0.00359578	0.752283	not_sig	-0.00790392	0.00445138	-0.00929614	0.00384202	0.812333	not_sig
HDL	1	109817590	G	T	0.3729	not_sig	0.022851	0.00402447	0.0226483	0.00372649	0.970435	not_sig	0.0147262	0.00457993	0.0174806	0.00398737	0.649227	not_sig
LDL	1	109817590	G	T	4.86e-07	sig	-0.139	0.00390879	-0.100152	0.00355688	1.24e-13	sig	-0.144796	0.00441475	-0.1	0.003773	1.29e-14	sig
nonHDL	1	109817590	G	T	8.13e-10	sig	-0.132	0.00408799	-0.0967377	0.00375075	1.03e-10	sig	-0.140009	0.00460427	-0.0976	0.00397643	2.63e-12	sig
TC	1	109817590	G	T	5.29e-07	sig	-0.116	0.00392212	-0.08484	0.00358858	2.82e-09	sig	-0.127835	0.0044132	-0.0879	0.00379601	5.7e-12	sig
LDL	1	110326545	G	A	0.1182	not_sig	-0.0454593	0.0137975	-0.00871275	0.0123109	0.0462918	not_sig	-0.0392152	0.0156609	-0.00373239	0.0131021	0.0814201	not_sig
nonHDL	1	110326545	G	A	0.01399	not_sig	-0.0479781	0.0144181	-0.00733394	0.0129514	0.0354732	not_sig	-0.0414888	0.0163185	0.000152481	0.0137749	0.0505481	not_sig
TC	1	110326545	G	A	0.1951	not_sig	-0.036933	0.0138468	-0.00147027	0.012411	0.0558239	not_sig	-0.0303395	0.0156584	0.00508806	0.0131693	0.0825129	not_sig
HDL	1	110470764	G	A	0.6306	not_sig	-0.0280582	0.00469953	-0.0224286	0.0043266	0.376841	not_sig	-0.0322686	0.00539982	-0.0238078	0.00465619	0.234084	not_sig
TC	1	114489689	T	C	0.1541	not_sig	-0.00339652	0.00378222	-0.00990188	0.00345608	0.202932	not_sig	-0.00597195	0.00429657	-0.00928144	0.00367338	0.557158	not_sig
TC	1	118172538	A	G	0.163	not_sig	0.00964225	0.0033701	0.00777982	0.00308527	0.682727	not_sig	0.00826636	0.00382879	0.00590836	0.00328308	0.63921	not_sig
HDL	1	120484718	T	C	0.7118	not_sig	0.0547053	0.0250291	0.0346262	0.0224543	0.54931	not_sig	0.0465411	0.0289363	0.0494798	0.0243911	0.937934	not_sig
HDL	1	145472741	C	A	0.6553	not_sig	0.139791	0.0319469	0.127507	0.0290104	0.775293	not_sig	0.137282	0.0366092	0.113339	0.0312705	0.618018	not_sig
TC	1	145472741	C	A	0.8111	not_sig	0.105252	0.0310379	0.111234	0.0282039	0.886256	not_sig	0.0890735	0.0351734	0.13485	0.0300871	0.32134	not_sig
logTG	1	149899389	G	A	0.2313	not_sig	-0.0240159	0.00603283	-0.0210593	0.00550276	0.716534	not_sig	-0.0310901	0.00689037	-0.0178678	0.00590385	0.143956	not_sig
HDL	1	149992277	T	C	0.1838	not_sig	0.021346	0.00588873	0.0169274	0.00543204	0.580224	not_sig	0.021804	0.006751	0.0166095	0.00583833	0.55949	not_sig
HDL	1	150842696	C	T	0.1997	not_sig	0.0185205	0.00412979	0.0164325	0.00380386	0.709207	not_sig	0.0188776	0.00475131	0.0159014	0.00408568	0.633893	not_sig
LDL	1	150958836	A	G	0.4681	not_sig	-0.0126412	0.00442451	-0.0157266	0.0040095	0.604345	not_sig	-0.0134825	0.00504496	-0.0192166	0.00426779	0.384232	not_sig
nonHDL	1	150958836	A	G	0.1071	not_sig	-0.0106771	0.00462142	-0.0149785	0.0042233	0.49084	not_sig	-0.0113586	0.00525771	-0.0189713	0.004491	0.269606	not_sig
TC	1	151064116	A	G	0.7104	not_sig	-0.00969452	0.00632863	-0.0168758	0.00578799	0.401098	not_sig	-0.0103771	0.00717416	-0.0212688	0.00615218	0.247835	not_sig
LDL	1	151658543	G	A	0.09393	not_sig	-0.0528445	0.0284205	-0.10284	0.0254595	0.18888	not_sig	-0.0689202	0.0319	-0.0812909	0.0271236	0.767041	not_sig
TC	1	154243457	A	T	0.4663	not_sig	0.0170408	0.00481479	0.0182093	0.00439579	0.857368	not_sig	0.0172448	0.0054792	0.0168957	0.00467977	0.961247	not_sig
logTG	1	154251626	A	G	0.4517	not_sig	-0.0172113	0.00357318	-0.0167256	0.00328067	0.920038	not_sig	-0.0183224	0.0040923	-0.0165727	0.00351989	0.745141	not_sig
nonHDL	1	154251626	A	G	0.4262	not_sig	-0.0127135	0.00371146	-0.0118058	0.00341828	0.856844	not_sig	-0.0123607	0.0042246	-0.0127113	0.00363815	0.949712	not_sig
HDL	1	154555733	A	T	3.95e-05	sig	0.000191	0.00366583	0.0129316	0.00339682	0.0105769	not_sig	0.00183608	0.00421067	0.0142	0.0036532	0.026	not_sig
logTG	1	155033334	G	A	0.5156	not_sig	0.00602075	0.00476421	0.00480634	0.00436439	0.850503	not_sig	0.00927377	0.0054469	0.00659128	0.00469202	0.708288	not_sig
LDL	1	155106054	A	G	0.6277	not_sig	-0.00708474	0.00324541	-0.0104772	0.00295913	0.438594	not_sig	-0.00661924	0.00370426	-0.010934	0.00315407	0.373836	not_sig
TC	1	155123837	G	C	0.4463	not_sig	-0.0100435	0.00334016	-0.00889223	0.00306286	0.798914	not_sig	-0.0113232	0.00379355	-0.00906928	0.0032548	0.651148	not_sig
nonHDL	1	155178782	A	T	0.09937	not_sig	0.00860581	0.0034682	0.00894442	0.00318263	0.942496	not_sig	0.00851831	0.00394198	0.00845389	0.00339016	0.990086	not_sig
HDL	1	156705822	C	T	0.2511	not_sig	0.00190204	0.00353107	0.00379378	0.00327024	0.693466	not_sig	0.00082039	0.00405933	0.00523442	0.00351706	0.409891	not_sig
LDL	1	158586966	A	T	0.224	not_sig	0.0122881	0.00362941	0.0083547	0.00329552	0.421062	not_sig	0.0121149	0.00414593	0.00828428	0.0035166	0.479842	not_sig
nonHDL	1	158586966	A	T	0.3695	not_sig	0.0108843	0.00379386	0.00882497	0.00347545	0.688153	not_sig	0.011567	0.0043234	0.00905598	0.00370488	0.658323	not_sig
TC	1	158607935	T	G	0.3169	not_sig	0.0117895	0.00368992	0.0105508	0.00336528	0.803568	not_sig	0.0130696	0.00419815	0.0102954	0.00358126	0.614173	not_sig
HDL	1	161078909	T	C	0.824	not_sig	0.00923249	0.00344164	0.00781923	0.00318607	0.762521	not_sig	0.0112147	0.00395967	0.00780215	0.0034265	0.513434	not_sig
LDL	1	161531340	G	A	0.1518	not_sig	0.0168879	0.00629343	0.0204073	0.00573814	0.678592	not_sig	0.0182905	0.00718756	0.0205156	0.00612381	0.813211	not_sig
TC	1	161531340	G	A	0.0163	not_sig	0.0186875	0.00631304	0.0232518	0.00578931	0.593106	not_sig	0.0214066	0.00718297	0.0225936	0.00616109	0.899916	not_sig
HDL	1	161614490	T	G	0.8989	not_sig	0.0149543	0.00347616	0.0104106	0.00321745	0.33608	not_sig	0.0178589	0.00399291	0.0101155	0.00345917	0.141622	not_sig
nonHDL	1	172357433	T	C	0.2637	not_sig	-0.00394751	0.00342902	-0.011592	0.00314175	0.0992935	not_sig	-0.00836488	0.00390194	-0.0137362	0.00334682	0.294758	not_sig
HDL	1	172361977	T	G	0.2863	not_sig	0.00697845	0.00337755	0.0102552	0.00312261	0.475018	not_sig	0.00437863	0.00388362	0.00836355	0.00335741	0.436354	not_sig
logTG	1	172361977	T	G	0.02156	not_sig	-0.00924118	0.00330245	-0.0135807	0.00301677	0.330622	not_sig	-0.0108293	0.00378148	-0.0124799	0.00323941	0.73959	not_sig
HDL	1	174168805	G	T	0.456	not_sig	-0.00522016	0.00344118	-0.00771581	0.00318264	0.593409	not_sig	-0.00513218	0.00395757	-0.00762873	0.00342133	0.632271	not_sig
nonHDL	1	174538958	C	G	0.3322	not_sig	0.00900759	0.00394372	0.00904865	0.00360867	0.993855	not_sig	0.00993032	0.00448756	0.0106207	0.00384233	0.906722	not_sig
HDL	1	177885762	G	A	0.07014	not_sig	-0.00762727	0.00394195	-0.00708383	0.00365013	0.919206	not_sig	-0.00753515	0.00453579	-0.00771767	0.00392748	0.975664	not_sig
LDL	1	177938437	G	A	0.5957	not_sig	-0.00785898	0.00436615	-0.0113102	0.0039705	0.557598	not_sig	-0.00790239	0.00497942	-0.0124152	0.00423278	0.48868	not_sig
TC	1	177938437	G	A	0.9003	not_sig	-0.00780216	0.00438046	-0.0114703	0.00400664	0.535509	not_sig	-0.00655028	0.00497689	-0.0128181	0.00425954	0.337341	not_sig
HDL	1	178533832	G	T	0.3522	not_sig	-0.0156003	0.00335991	-0.0141943	0.00309862	0.757726	not_sig	-0.0173663	0.00386311	-0.0146728	0.00333159	0.59649	not_sig
HDL	1	182150978	C	A	0.2404	not_sig	-0.0234775	0.00355476	-0.0167707	0.00328048	0.164418	not_sig	-0.0236465	0.00408774	-0.0173144	0.00352554	0.239492	not_sig
LDL	1	182165484	G	A	0.65	not_sig	0.0098662	0.00345402	0.0125393	0.00313269	0.565393	not_sig	0.00888172	0.00394213	0.011832	0.00333834	0.566854	not_sig
nonHDL	1	182165484	G	A	0.3042	not_sig	0.00839482	0.0036107	0.0130855	0.00330116	0.336332	not_sig	0.00816778	0.00410939	0.0119092	0.00351528	0.487837	not_sig
LDL	1	183065406	A	G	0.2017	not_sig	0.0126714	0.00328013	0.00770399	0.00297831	0.260896	not_sig	0.0144312	0.00374265	0.00869816	0.0031716	0.241257	not_sig
TC	1	183112041	G	C	0.9073	not_sig	0.0120489	0.00328726	0.00960575	0.00300257	0.58213	not_sig	0.0144972	0.0037359	0.0110973	0.00318839	0.487597	not_sig
nonHDL	1	183115018	C	T	0.3237	not_sig	0.0113778	0.00343507	0.00608209	0.00314686	0.254327	not_sig	0.014168	0.00390841	0.00719729	0.00334834	0.17441	not_sig
HDL	1	184035116	A	G	0.952	not_sig	-0.00707118	0.00351561	-0.00434552	0.00324584	0.56785	not_sig	-0.00650085	0.00404325	-0.00290065	0.00349228	0.49922	not_sig
logTG	1	184865132	T	A	0.6296	not_sig	-0.0426728	0.0131195	-0.0462562	0.0118858	0.839151	not_sig	-0.0527103	0.0150464	-0.047769	0.012738	0.801556	not_sig
LDL	1	197129981	C	T	0.2292	not_sig	0.00748317	0.00443094	0.0111299	0.0040169	0.540906	not_sig	0.00585376	0.00506338	0.0116642	0.00428784	0.379878	not_sig
TC	1	197159347	G	A	0.4187	not_sig	0.0104353	0.00445406	0.0125913	0.00406097	0.719833	not_sig	0.00928176	0.00507032	0.0128696	0.00432274	0.589221	not_sig
nonHDL	1	198990494	G	A	0.3692	not_sig	-0.0110144	0.003872	-0.0165224	0.00355364	0.293287	not_sig	-0.0137448	0.00439518	-0.0149376	0.0037872	0.836666	not_sig
LDL	1	199010721	C	T	0.3897	not_sig	0.0102235	0.00365471	0.0148643	0.00332391	0.3462	not_sig	0.0120291	0.00416169	0.0141238	0.00354545	0.700833	not_sig
TC	1	199010721	C	T	0.2233	not_sig	0.00933252	0.00366671	0.016345	0.0033536	0.157025	not_sig	0.0122393	0.00415936	0.0145238	0.00356717	0.675899	not_sig
HDL	1	200049302	T	A	0.5245	not_sig	-0.00493335	0.00368463	-0.00830899	0.00339465	0.499264	not_sig	-0.00669727	0.00423001	-0.00949815	0.00364858	0.615122	not_sig
logTG	1	202184600	C	T	0.7974	not_sig	-0.00386629	0.00333488	-0.00956786	0.00304668	0.20561	not_sig	-0.00419068	0.00381912	-0.010341	0.00327181	0.220068	not_sig
HDL	1	202197659	C	T	0.2372	not_sig	0.00561435	0.00342625	0.001872	0.00316932	0.42137	not_sig	0.00442742	0.00394295	0.00190248	0.00340832	0.627114	not_sig
TC	1	203255493	T	A	0.3565	not_sig	4.5e-05	0.00327	0.00545325	0.0029894	0.220927	not_sig	0.000311	0.0037105	0.00340393	0.00317798	0.525588	not_sig
logTG	1	203517292	A	G	0.003506	not_sig	-0.00625213	0.00329791	-0.00992207	0.00301094	0.409886	not_sig	-0.00586375	0.00377599	-0.00905951	0.00323293	0.519148	not_sig
HDL	1	203518873	A	C	0.01732	not_sig	0.00520237	0.00337621	0.00958574	0.00311812	0.33886	not_sig	0.00542991	0.00388298	0.00693421	0.00335305	0.768741	not_sig
logTG	1	205070573	G	A	0.3406	not_sig	0.0125891	0.00334299	0.0103051	0.00306122	0.613365	not_sig	0.0127437	0.00383421	0.0110652	0.00328824	0.738981	not_sig
HDL	1	205099959	C	A	0.3274	not_sig	-0.0143941	0.00397558	-0.00776795	0.00368018	0.220012	not_sig	-0.0143225	0.00456793	-0.00977306	0.0039629	0.450626	not_sig
nonHDL	1	205114873	C	G	0.6864	not_sig	0.00829289	0.00342588	0.0085145	0.00314827	0.961906	not_sig	0.0110825	0.0039051	0.0111526	0.00335491	0.989105	not_sig
HDL	1	205677148	A	G	0.8679	not_sig	0.0124579	0.00340024	0.0149557	0.00315524	0.589224	not_sig	0.0149019	0.00390643	0.0138551	0.00339239	0.839224	not_sig
HDL	1	209849714	TA	T	0.7651	not_sig	-0.00891483	0.00754149	-0.0108621	0.00696354	0.849125	not_sig	-0.00757772	0.00866996	-0.0100305	0.00747171	0.829849	not_sig
HDL	1	212537553	G	A	0.368	not_sig	0.00932465	0.00343877	0.0107674	0.00318934	0.75772	not_sig	0.00954807	0.0039503	0.0115611	0.0034308	0.699647	not_sig
HDL	1	219664627	G	A	0.5389	not_sig	-0.016207	0.00338577	-0.00998025	0.00313565	0.176037	not_sig	-0.0167308	0.00388864	-0.0102529	0.00337275	0.206978	not_sig
nonHDL	1	219673705	A	G	0.1512	not_sig	0.00686938	0.0035678	0.0096954	0.00326989	0.558172	not_sig	0.00605749	0.00405806	0.00818376	0.00348155	0.690071	not_sig
logTG	1	219734960	A	C	0.9818	not_sig	-0.0154627	0.00350123	-0.0136844	0.00320421	0.707124	not_sig	-0.0145462	0.00400279	-0.0131749	0.00343756	0.794396	not_sig
HDL	1	220970028	A	G	0.6408	not_sig	0.0256502	0.00365663	0.025373	0.00338316	0.955505	not_sig	0.0285455	0.00420714	0.0249127	0.00363622	0.512414	not_sig
LDL	1	220970028	A	G	0.458	not_sig	0.0255428	0.00355197	0.0234539	0.0032324	0.662726	not_sig	0.0273387	0.00405592	0.0231846	0.00344476	0.433755	not_sig
logTG	1	220970028	A	G	0.2823	not_sig	-0.012315	0.00357267	-0.00980831	0.00327056	0.603784	not_sig	-0.0131258	0.00409296	-0.009038	0.00351006	0.447129	not_sig
nonHDL	1	220970028	A	G	0.7856	not_sig	0.02139	0.00371437	0.0196665	0.00340529	0.731616	not_sig	0.0227664	0.00422969	0.0201498	0.00362634	0.637691	not_sig
TC	1	220970028	A	G	0.1322	not_sig	0.0266036	0.00356389	0.0301902	0.00326131	0.456577	not_sig	0.0290011	0.00405432	0.0303029	0.00346585	0.806652	not_sig
HDL	1	224544746	G	A	0.6832	not_sig	-0.0310045	0.00946745	-0.0305941	0.0087475	0.974533	not_sig	-0.0296671	0.0108609	-0.0331987	0.00942036	0.805438	not_sig
LDL	1	224545410	T	C	0.7241	not_sig	-0.0139528	0.00396732	-0.0130721	0.0036142	0.869293	not_sig	-0.0130456	0.0045286	-0.014452	0.00385277	0.812511	not_sig
TC	1	224549524	T	C	0.6435	not_sig	-0.0142365	0.00398093	-0.0155554	0.00364672	0.80647	not_sig	-0.0132784	0.00452685	-0.0161789	0.00387653	0.625535	not_sig
nonHDL	1	224646328	C	T	0.639	not_sig	-0.0145878	0.00415064	-0.0122605	0.00380808	0.678644	not_sig	-0.0133168	0.00472568	-0.0133527	0.00405665	0.995384	not_sig
logTG	1	228056868	T	C	0.1108	not_sig	-0.0152295	0.00343038	-0.0088464	0.00312818	0.16798	not_sig	-0.0164126	0.00392346	-0.00905929	0.0033574	0.153322	not_sig
HDL	1	230294715	C	A	0.0978	not_sig	0.0539357	0.00342343	0.054594	0.00317165	0.887526	not_sig	0.0572095	0.00393748	0.0555475	0.00341335	0.749109	not_sig
logTG	1	230294715	C	A	0.8855	not_sig	-0.0415342	0.00334628	-0.0423985	0.00306561	0.848533	not_sig	-0.043745	0.00383339	-0.0422884	0.00329383	0.772588	not_sig
nonHDL	1	230307222	T	G	0.6565	not_sig	-0.0176449	0.00374138	-0.0137659	0.00344272	0.444232	not_sig	-0.021393	0.00425688	-0.015519	0.00366938	0.294608	not_sig
HDL	1	230796872	CAT	C	0.4967	not_sig	-0.0261601	0.00842741	-0.0187109	0.00775418	0.514225	not_sig	-0.0334381	0.00965839	-0.0166884	0.00834594	0.188242	not_sig
logTG	1	230823363	A	G	0.2438	not_sig	0.0142353	0.00751993	0.0296872	0.00684676	0.127615	not_sig	0.0232632	0.00858533	0.0296434	0.00736195	0.571607	not_sig
logTG	1	234848712	G	A	0.1154	not_sig	-5.69e-05	0.00328	0.00887288	0.00300704	0.0443493	not_sig	-0.000292	0.00376427	0.0102039	0.00323066	0.0338548	not_sig
HDL	1	234852760	C	T	1.94e-05	sig	0.0216	0.00334865	0.00943842	0.00310284	0.00752582	not_sig	0.0235456	0.00385399	0.0112889	0.00333883	0.0159397	not_sig
LDL	1	234853268	A	C	0.3275	not_sig	0.039498	0.00326067	0.0350984	0.0029665	0.316917	not_sig	0.041783	0.00372443	0.0369182	0.00316488	0.318231	not_sig
TC	1	234853268	A	C	0.01248	not_sig	0.040963	0.00327174	0.0369322	0.00299315	0.362022	not_sig	0.0434845	0.00372304	0.0391021	0.00318428	0.369724	not_sig
nonHDL	1	234853406	A	G	0.06187	not_sig	0.0368026	0.00340758	0.0343805	0.00312737	0.599503	not_sig	0.0384773	0.00388152	0.036124	0.00333413	0.64468	not_sig
LDL	1	246892695	G	A	0.4249	not_sig	0.0141689	0.00562914	0.011462	0.00509763	0.720768	not_sig	0.0184393	0.00641444	0.0136504	0.00544552	0.568197	not_sig
HDL	2	239597	C	G	0.2726	not_sig	0.0062161	0.00349672	0.0164951	0.00324631	0.0307491	not_sig	0.00493712	0.0040206	0.0156025	0.00349057	0.0445761	not_sig
logTG	2	256116	G	T	0.6075	not_sig	-0.00604772	0.0033852	-0.00969274	0.00310611	0.426277	not_sig	-0.00656735	0.00387435	-0.00785847	0.00333486	0.800064	not_sig
nonHDL	2	3636478	T	G	0.943	not_sig	0.0148779	0.00503385	0.00972645	0.00462283	0.449752	not_sig	0.0226581	0.00573604	0.00980322	0.00493361	0.0884323	not_sig
logTG	2	3640142	C	T	0.8484	not_sig	0.0148233	0.00428896	0.0199489	0.00392572	0.376704	not_sig	0.0170491	0.00491364	0.0215669	0.00422208	0.484375	not_sig
TC	2	3640142	C	T	0.1407	not_sig	-0.0159508	0.00427899	-0.0162295	0.00391455	0.961559	not_sig	-0.0211352	0.0048678	-0.016558	0.004169	0.473906	not_sig
HDL	2	3642361	T	C	0.5554	not_sig	-0.0192171	0.00438937	-0.020713	0.00406494	0.802015	not_sig	-0.0230644	0.00505018	-0.0212814	0.00437831	0.789086	not_sig
LDL	2	3642361	T	C	0.3685	not_sig	-0.0150836	0.0042678	-0.0121098	0.0038828	0.605265	not_sig	-0.0201994	0.00487349	-0.0123611	0.00414692	0.219345	not_sig
LDL	2	8718961	G	A	0.6422	not_sig	-0.0087525	0.00371081	-0.0102818	0.00336599	0.759536	not_sig	-0.0126272	0.0042302	-0.00951615	0.00358707	0.573797	not_sig
TC	2	8723673	G	A	0.2373	not_sig	-0.011002	0.00373557	-0.0101137	0.00340754	0.860146	not_sig	-0.0138246	0.00424303	-0.00913993	0.00362113	0.399715	not_sig
LDL	2	16890382	C	G	0.2501	not_sig	-0.00457914	0.00462826	0.00131329	0.00420964	0.344944	not_sig	-0.00386478	0.00529121	0.00196631	0.0044859	0.399285	not_sig
LDL	2	17967586	A	G	0.7266	not_sig	-0.0154268	0.00529065	-0.00877093	0.00481238	0.35071	not_sig	-0.0229938	0.00603667	-0.00876815	0.0051297	0.0717525	not_sig
nonHDL	2	17967586	A	G	0.187	not_sig	-0.0136508	0.00553283	-0.0114116	0.00507369	0.764862	not_sig	-0.0193272	0.00629706	-0.0119663	0.00540285	0.373688	not_sig
TC	2	17967586	A	G	0.7184	not_sig	-0.0179697	0.00530753	-0.0112174	0.00485565	0.346576	not_sig	-0.0251248	0.00603317	-0.0111842	0.00516141	0.0783019	not_sig
LDL	2	19693384	A	G	0.1187	not_sig	-0.0893955	0.24215	0.0944458	0.191988	0.550828	not_sig	-0.0721331	0.283413	-0.0354814	0.213652	0.917532	not_sig
nonHDL	2	19693384	A	G	0.746	not_sig	-0.0607243	0.251201	0.0687449	0.200389	0.686213	not_sig	0.0385398	0.296778	-0.0638111	0.22263	0.782076	not_sig
TC	2	19693384	A	G	0.07549	not_sig	-0.126183	0.243207	0.182498	0.193859	0.319646	not_sig	-0.119778	0.283588	0.0647988	0.215138	0.603118	not_sig
LDL	2	20370641	A	C	0.2069	not_sig	-0.0166851	0.00325956	-0.0175044	0.00296099	0.852012	not_sig	-0.0181286	0.00371863	-0.0185943	0.00315753	0.923747	not_sig
nonHDL	2	20371380	G	A	0.2462	not_sig	-0.0161302	0.00342877	-0.0210782	0.00313627	0.28562	not_sig	-0.0180922	0.00389918	-0.0226026	0.00334256	0.378511	not_sig
TC	2	20371380	G	A	0.6348	not_sig	-0.0221184	0.00329157	-0.0248706	0.00300382	0.535692	not_sig	-0.0244484	0.00373885	-0.0265169	0.00319472	0.673195	not_sig
logTG	2	20371772	G	A	0.415	not_sig	-0.00962883	0.00328013	-0.0184346	0.00299865	0.0469346	not_sig	-0.0105539	0.00375357	-0.0188466	0.00322051	0.0927025	not_sig
HDL	2	20372409	G	A	0.0283	not_sig	-0.0189325	0.00335523	-0.0109703	0.00310165	0.0805659	not_sig	-0.0217227	0.00385663	-0.011965	0.00333608	0.0550097	not_sig
HDL	2	21231524	G	A	0.1016	not_sig	0.049591	0.00414855	0.0496562	0.00383245	0.990752	not_sig	0.0551393	0.00475529	0.0493768	0.00411052	0.357939	not_sig
logTG	2	21231524	G	A	0.005484	not_sig	-0.0605687	0.00405261	-0.0613746	0.00370284	0.882975	not_sig	-0.0673137	0.00462701	-0.0623	0.00396695	0.41	not_sig
LDL	2	21267461	G	A	0.07779	not_sig	0.0817825	0.0034397	0.0807416	0.00311864	0.822136	not_sig	0.089168	0.00394042	0.0845	0.0033336	0.369	not_sig
nonHDL	2	21267461	G	A	0.01874	not_sig	0.0776722	0.00359352	0.0771829	0.00328683	0.919738	not_sig	0.0858834	0.00410623	0.0811349	0.00351119	0.378148	not_sig
TC	2	21267461	G	A	0.02758	not_sig	0.0722601	0.00345148	0.0722385	0.00314667	0.99629	not_sig	0.0823049	0.00393897	0.0776	0.0033542	0.358	not_sig
logTG	2	21778585	A	G	0.3872	not_sig	-0.0405986	0.0157856	0.00673319	0.0144124	0.0263878	not_sig	-0.0471024	0.0179919	0.00673438	0.0154901	0.0229735	not_sig
LDL	2	21942500	G	C	0.1497	not_sig	0.446169	0.116434	0.734738	0.112739	0.0741874	not_sig	0.426945	0.140335	0.678263	0.123879	0.178208	not_sig
HDL	2	21979516	G	A	0.2079	not_sig	0.00784409	0.00990087	0.00566393	0.00914122	0.87112	not_sig	0.00505791	0.0113287	0.00688557	0.00980976	0.902665	not_sig
LDL	2	22501253	T	G	0.3789	not_sig	-0.00318187	0.00326025	-0.00375605	0.00296981	0.896125	not_sig	-0.00347616	0.0037208	-0.00456283	0.0031639	0.823458	not_sig
LDL	2	23015285	C	T	0.2309	not_sig	0.00397463	0.00463044	0.00223113	0.00421026	0.779971	not_sig	0.00783381	0.00528015	0.00329217	0.00448404	0.51091	not_sig
TC	2	23882347	G	A	0.7076	not_sig	-0.00118546	0.0032944	-0.00207607	0.00300577	0.841276	not_sig	-0.00277677	0.00374182	-0.00128209	0.00319804	0.760755	not_sig
LDL	2	24400769	A	C	0.4721	not_sig	0.0134106	0.00368012	0.0111322	0.00335845	0.646541	not_sig	0.0131163	0.0042122	0.0125326	0.00358262	0.915696	not_sig
TC	2	24726602	GT	G	0.03202	not_sig	-0.0111075	0.00369442	-0.00395696	0.00338442	0.152394	not_sig	-0.00802481	0.00419862	-0.00334114	0.00360052	0.395811	not_sig
logTG	2	25592918	T	C	0.3323	not_sig	-0.00549679	0.00351195	-0.0141331	0.00321071	0.0687599	not_sig	-0.00540227	0.00401925	-0.0140505	0.00344779	0.101499	not_sig
TC	2	26256840	A	C	0.8287	not_sig	-0.00540951	0.00405252	-0.00520346	0.00370924	0.969997	not_sig	-0.00644188	0.00460527	-0.00389451	0.0039429	0.673511	not_sig
LDL	2	26358156	A	G	0.3951	not_sig	-0.0267875	0.00861792	-0.0230949	0.00783644	0.750568	not_sig	-0.0304999	0.00979801	-0.0246383	0.00839361	0.648696	not_sig
nonHDL	2	26358156	A	G	0.824	not_sig	-0.0221697	0.00899388	-0.0245031	0.00826627	0.848099	not_sig	-0.0292476	0.0101933	-0.0246717	0.0088557	0.733991	not_sig
HDL	2	26571411	G	A	0.5324	not_sig	-0.00549731	0.00335559	-0.00772001	0.00310852	0.626064	not_sig	-0.00430621	0.00385639	-0.00748835	0.00334447	0.531906	not_sig
TC	2	26911509	A	C	0.8123	not_sig	0.0123302	0.00336214	0.00883726	0.00306991	0.441698	not_sig	0.0127121	0.00382516	0.00948581	0.00326667	0.520134	not_sig
LDL	2	26923568	T	C	0.1849	not_sig	0.0115811	0.00334805	0.0111702	0.00304009	0.927398	not_sig	0.0118723	0.00382305	0.0120419	0.00324422	0.972944	not_sig
logTG	2	26924018	C	G	0.1533	not_sig	-0.0283535	0.00822249	-0.0191919	0.00747267	0.408319	not_sig	-0.0275046	0.00938757	-0.0202304	0.00800223	0.554302	not_sig
nonHDL	2	26929282	T	G	0.9654	not_sig	0.0151842	0.00348905	0.012237	0.00319658	0.532264	not_sig	0.0148583	0.00397209	0.0136185	0.00340834	0.812243	not_sig
HDL	2	27730940	T	C	0.05748	not_sig	-0.000563898	0.0034244	0.00686158	0.00316459	0.110282	not_sig	-0.00220582	0.00393938	0.00470217	0.00341014	0.183693	not_sig
LDL	2	27730940	T	C	0.005866	not_sig	-0.0493027	0.0033281	-0.0423654	0.00302265	0.121789	not_sig	-0.0454479	0.00380057	-0.0428016	0.00322871	0.59465	not_sig
logTG	2	27730940	T	C	0.8369	not_sig	-0.0937041	0.00334716	-0.0875534	0.00305805	0.173701	not_sig	-0.0934873	0.00383482	-0.0876163	0.00328969	0.243939	not_sig
nonHDL	2	27730940	T	C	0.4918	not_sig	-0.0619485	0.00347838	-0.0519804	0.00318529	0.0340635	not_sig	-0.0602521	0.00396034	-0.0528234	0.00340088	0.153582	not_sig
TC	2	27730940	T	C	0.6169	not_sig	-0.058566	0.00333915	-0.0481635	0.0030495	0.0210697	not_sig	-0.05808	0.00379867	-0.0498454	0.00324832	0.0985263	not_sig
TC	2	29133905	C	G	0.07285	not_sig	0.00608899	0.0038601	0.0110552	0.00353212	0.341206	not_sig	0.00724226	0.00438383	0.0102687	0.00375497	0.599061	not_sig
HDL	2	30480750	T	G	0.7089	not_sig	-0.0121692	0.00413865	-0.00938048	0.00382865	0.619896	not_sig	-0.0120583	0.00474955	-0.00843572	0.00411654	0.563297	not_sig
TC	2	32182528	T	C	0.09076	not_sig	-0.0100713	0.00334001	-0.00708927	0.00305172	0.508645	not_sig	-0.00923131	0.00379722	-0.00700957	0.0032427	0.655484	not_sig
HDL	2	42590122	C	G	0.06815	not_sig	0.00615408	0.00358643	0.00861848	0.00331335	0.612774	not_sig	0.00397333	0.00412342	0.00775612	0.00355886	0.486176	not_sig
nonHDL	2	43455654	T	C	0.618	not_sig	0.0177433	0.0046939	0.0190723	0.00429493	0.834085	not_sig	0.0132235	0.00534973	0.0182566	0.00458343	0.473735	not_sig
logTG	2	43490619	A	T	0.9324	not_sig	0.0136733	0.00449376	0.0168875	0.00409724	0.596105	not_sig	0.0137017	0.00515424	0.0146505	0.00440645	0.88842	not_sig
LDL	2	43561161	C	A	0.1298	not_sig	0.00763716	0.00326457	0.00857411	0.00296729	0.831348	not_sig	0.0057811	0.00372227	0.010404	0.00316629	0.342823	not_sig
TC	2	43561161	C	A	0.3621	not_sig	0.00669536	0.00327542	0.00919192	0.00299366	0.572632	not_sig	0.00609108	0.0037207	0.0109356	0.00318548	0.321301	not_sig
LDL	2	44074431	C	T	0.0004061	not_sig	-0.0571379	0.00346805	-0.0694065	0.00314927	0.00863465	not_sig	-0.0620054	0.00396935	-0.0705	0.00336908	0.102	not_sig
logTG	2	44074431	C	T	0.4364	not_sig	-0.0100529	0.00348789	-0.00362311	0.0031863	0.172311	not_sig	-0.011211	0.00400532	-0.00240751	0.00343277	0.0942341	not_sig
nonHDL	2	44074431	C	T	2.87e-05	sig	-0.0532	0.00362439	-0.0649155	0.0033172	0.0167505	not_sig	-0.05989	0.00413657	-0.0663	0.00354569	0.238	not_sig
TC	2	44074431	C	T	2.54e-05	sig	-0.0518	0.00347965	-0.0668916	0.00317755	0.00128248	not_sig	-0.060228	0.00396769	-0.0695	0.00338979	0.0736	not_sig
nonHDL	2	44663206	T	A	0.9806	not_sig	-0.0649624	0.017716	-0.0496879	0.0159285	0.520277	not_sig	-0.0699997	0.0201243	-0.0452647	0.016919	0.345486	not_sig
TC	2	44663206	T	A	0.4425	not_sig	-0.0585883	0.0170052	-0.0640325	0.0152128	0.810903	not_sig	-0.0619053	0.0192876	-0.0581195	0.0161115	0.879936	not_sig
LDL	2	44663302	C	T	0.1413	not_sig	-0.055705	0.0160765	-0.0562901	0.0142335	0.978198	not_sig	-0.0577351	0.0182986	-0.0531319	0.0151448	0.845921	not_sig
LDL	2	46166321	A	G	0.2183	not_sig	-0.0117923	0.00325565	-0.0058446	0.00295272	0.17479	not_sig	-0.0140746	0.00371979	-0.0049537	0.00314791	0.0605391	not_sig
nonHDL	2	46166321	A	G	0.7561	not_sig	-0.0120687	0.00340267	-0.0033834	0.00310997	0.0588502	not_sig	-0.0146103	0.00387637	-0.00252318	0.0033128	0.0174566	not_sig
TC	2	46166321	A	G	0.1954	not_sig	-0.0115879	0.00326683	-0.00682043	0.00297906	0.279559	not_sig	-0.0148813	0.00371862	-0.00627206	0.00316713	0.0771651	not_sig
HDL	2	48962291	G	T	1.46e-12	sig	-0.00572	0.00393895	-0.0303298	0.00363904	4.18e-06	sig	-0.0033702	0.00452814	-0.0278	0.00391678	4.18e-05	sig
logTG	2	48962291	G	T	1.3e-09	sig	0.00334	0.00385214	0.0272536	0.0035186	4.28e-06	sig	0.00327992	0.00440703	0.0255	0.00378284	0.000123	not_sig
HDL	2	54033988	C	G	0.1681	not_sig	0.00142852	0.00339308	0.01034	0.00312954	0.0528763	not_sig	0.0010059	0.0039017	0.0121819	0.00336525	0.0296282	not_sig
HDL	2	58772377	T	A	0.1663	not_sig	0.00839337	0.00338122	0.00823476	0.00312225	0.972431	not_sig	0.0114291	0.00388905	0.00422187	0.00335626	0.159472	not_sig
logTG	2	58950363	G	T	0.9738	not_sig	0.00957999	0.0036283	0.00481018	0.00331447	0.33041	not_sig	0.0103137	0.00415573	0.00458477	0.00356376	0.294019	not_sig
HDL	2	59293596	C	A	0.3539	not_sig	0.00645552	0.00350572	0.0056159	0.00324228	0.860045	not_sig	0.00825132	0.0040283	0.00560718	0.00348768	0.618761	not_sig
TC	2	61563408	G	A	0.2181	not_sig	-0.00461972	0.00449654	-0.0126399	0.00407847	0.185239	not_sig	-0.0090715	0.00510193	-0.0131582	0.00433261	0.540378	not_sig
nonHDL	2	61577435	T	C	0.2953	not_sig	-0.00742016	0.00475357	-0.0123882	0.00432014	0.438006	not_sig	-0.0116548	0.0053987	-0.0125714	0.0045994	0.896895	not_sig
logTG	2	61735446	C	T	0.2547	not_sig	-0.00265727	0.00329524	-0.00755907	0.00301013	0.270753	not_sig	-0.00504434	0.00376868	-0.00730206	0.00323143	0.648366	not_sig
LDL	2	62939397	G	A	0.0003603	not_sig	-0.015492	0.00354682	-0.0239466	0.00321539	0.076575	not_sig	-0.0213032	0.00403955	-0.0272	0.00342544	0.262	not_sig
nonHDL	2	62959308	T	A	0.003929	not_sig	-0.0128867	0.00368971	-0.023885	0.00337035	0.0273184	not_sig	-0.0199841	0.00419018	-0.0267379	0.00358785	0.219568	not_sig
TC	2	62978981	G	T	0.001026	not_sig	-0.0116358	0.00354661	-0.0210948	0.00322988	0.0480032	not_sig	-0.0179311	0.00402511	-0.02494	0.00343153	0.183934	not_sig
nonHDL	2	64913045	C	G	0.4343	not_sig	0.00829737	0.00371592	0.0134271	0.00340658	0.307542	not_sig	0.0103343	0.00422864	0.0142722	0.00362607	0.478399	not_sig
LDL	2	64923808	C	T	0.7105	not_sig	0.00878845	0.00354655	0.0117866	0.00322595	0.530598	not_sig	0.0117025	0.00404717	0.0125062	0.00343658	0.879364	not_sig
TC	2	64923808	C	T	0.5373	not_sig	0.0108539	0.00355848	0.0123029	0.00325503	0.763196	not_sig	0.0137719	0.0040455	0.0130323	0.00345779	0.889178	not_sig
HDL	2	65284231	A	T	0.1219	not_sig	0.0179628	0.00344926	0.0101327	0.00320272	0.0952847	not_sig	0.0166842	0.00396086	0.00982292	0.00344357	0.189895	not_sig
logTG	2	65296280	T	C	0.257	not_sig	-0.018208	0.00339024	-0.0146635	0.00311263	0.439943	not_sig	-0.0176449	0.00387709	-0.0140043	0.00334228	0.475746	not_sig
TC	2	65601600	C	A	0.3214	not_sig	-0.0118978	0.00327229	-0.00539096	0.00299295	0.141198	not_sig	-0.0155254	0.00371839	-0.0058946	0.00318221	0.0484694	not_sig
logTG	2	66665146	T	C	0.884	not_sig	-0.00507365	0.00349285	-0.00967821	0.00319958	0.329672	not_sig	-0.00553453	0.00400086	-0.0102966	0.00343675	0.365267	not_sig
HDL	2	66677881	G	T	0.1459	not_sig	0.00779007	0.00354707	0.0116145	0.00328587	0.427687	not_sig	0.00677035	0.00408123	0.0127665	0.00353522	0.265462	not_sig
HDL	2	70233392	C	T	0.6577	not_sig	0.00795501	0.00345937	0.00737993	0.00320722	0.902705	not_sig	0.0085365	0.00397888	0.00912357	0.00345069	0.911004	not_sig
LDL	2	70449776	A	G	0.3086	not_sig	0.009068	0.00332731	0.00742319	0.00302579	0.713813	not_sig	0.0102397	0.00379768	0.00828481	0.00322754	0.694083	not_sig
TC	2	70471899	A	G	0.1358	not_sig	0.0110083	0.00333639	0.00975594	0.00305092	0.781182	not_sig	0.0133641	0.00379338	0.0116129	0.00324529	0.725024	not_sig
nonHDL	2	70511784	G	T	0.05232	not_sig	-0.00763502	0.00347431	-0.00761619	0.00318553	0.996803	not_sig	-0.00963557	0.00395362	-0.00836594	0.00339496	0.806995	not_sig
TC	2	71648425	G	T	0.8127	not_sig	-0.00642941	0.00371811	-0.00643076	0.00340121	0.999785	not_sig	-0.00606853	0.00421908	-0.00376333	0.00361499	0.677376	not_sig
logTG	2	72329685	C	T	0.5988	not_sig	0.00507262	0.00346209	0.00359434	0.00316052	0.751833	not_sig	0.00214959	0.00396586	0.00438439	0.00339296	0.667658	not_sig
HDL	2	85542718	G	A	0.3421	not_sig	0.00911494	0.0033508	0.00879615	0.00309171	0.9441	not_sig	0.00817523	0.00384736	0.0111818	0.00332411	0.553212	not_sig
TC	2	85874044	C	T	0.03719	not_sig	-0.0107324	0.00340557	-0.00735482	0.00310386	0.462316	not_sig	-0.0123443	0.00387084	-0.00749957	0.00329942	0.33951	not_sig
LDL	2	85879041	G	T	0.8475	not_sig	-0.0122521	0.00362085	-0.00858471	0.00328546	0.451946	not_sig	-0.0149433	0.00412846	-0.00947474	0.00350049	0.311014	not_sig
TC	2	86859298	A	C	0.01224	not_sig	-0.00671867	0.00335339	-0.0134672	0.00306738	0.136475	not_sig	-0.00732487	0.00381097	-0.0150543	0.00326326	0.122392	not_sig
nonHDL	2	88428571	C	T	0.1562	not_sig	0.00303796	0.00346016	0.00519519	0.0031751	0.645062	not_sig	0.00574674	0.00393643	0.00591202	0.00338479	0.974533	not_sig
LDL	2	88438050	C	A	0.3402	not_sig	0.0048983	0.00327302	0.0056625	0.00297958	0.862545	not_sig	0.00850975	0.00373366	0.0048222	0.00317934	0.450835	not_sig
TC	2	88438050	C	A	0.1803	not_sig	0.00471758	0.00328384	0.00645809	0.00300629	0.695042	not_sig	0.00764945	0.00373177	0.00593217	0.00319898	0.726084	not_sig
HDL	2	100729293	T	C	0.2474	not_sig	0.0129273	0.00440999	0.0119021	0.00405786	0.863794	not_sig	0.0109751	0.00506735	0.00871519	0.00435656	0.734529	not_sig
LDL	2	101631888	C	G	0.371	not_sig	-0.0112957	0.00337443	-0.00761694	0.0030661	0.418458	not_sig	-0.0102866	0.00384618	-0.00820048	0.0032694	0.67858	not_sig
nonHDL	2	101631888	C	G	0.5062	not_sig	-0.011007	0.00352715	-0.00891553	0.00323272	0.661132	not_sig	-0.0101811	0.00400982	-0.00992323	0.00344542	0.960995	not_sig
TC	2	101631888	C	G	0.4675	not_sig	-0.0102035	0.00338562	-0.00656577	0.00309344	0.426371	not_sig	-0.0104331	0.00384438	-0.00748292	0.00328932	0.558746	not_sig
LDL	2	109090267	G	C	0.8736	not_sig	0.013095	0.00412418	0.0191302	0.00374436	0.277281	not_sig	0.0132195	0.00470687	0.0191522	0.00399512	0.335256	not_sig
nonHDL	2	109093836	A	G	0.8759	not_sig	0.0135527	0.00430663	0.0202628	0.00394509	0.24929	not_sig	0.0141949	0.00490137	0.0199401	0.00420565	0.372387	not_sig
TC	2	109146017	T	A	0.2829	not_sig	0.0159214	0.00442495	0.0172284	0.00404193	0.826889	not_sig	0.0168252	0.00503299	0.0172395	0.00429927	0.949961	not_sig
TC	2	111698040	A	C	0.3231	not_sig	0.00976784	0.00429876	0.00921987	0.00393043	0.924842	not_sig	0.0158841	0.00489504	0.00902143	0.00417897	0.284985	not_sig
HDL	2	111714577	C	T	0.456	not_sig	-0.00917782	0.003673	-0.00913763	0.00339317	0.993569	not_sig	-0.0109902	0.00422225	-0.00991872	0.00364775	0.847301	not_sig
logTG	2	111927379	A	G	0.06576	not_sig	-0.0105323	0.00327784	-0.0106879	0.00299373	0.971956	not_sig	-0.010915	0.00375092	-0.0106344	0.003212	0.954552	not_sig
logTG	2	112763640	C	G	0.1442	not_sig	-0.00663747	0.00337149	-0.00296285	0.00308849	0.420301	not_sig	-0.0048259	0.00385866	-0.00263005	0.00331503	0.665135	not_sig
LDL	2	113841030	A	G	0.000137	not_sig	-0.00279685	0.00331126	-0.0125585	0.00300681	0.0286312	not_sig	-0.00610531	0.00378019	-0.0122	0.00320403	0.218	not_sig
TC	2	113841030	A	G	6.95e-05	sig	-0.00387	0.00332295	-0.0146083	0.00303361	0.0166617	not_sig	-0.00693735	0.00377923	-0.0144	0.0032235	0.13	not_sig
nonHDL	2	113842506	T	C	0.02127	not_sig	-0.0047061	0.00348243	-0.0130722	0.00318885	0.0756215	not_sig	-0.00795188	0.00396458	-0.0132224	0.00339519	0.311293	not_sig
logTG	2	113867288	T	C	0.02938	not_sig	-0.00667895	0.0033031	-0.00997414	0.00301616	0.460073	not_sig	-0.00769457	0.00378185	-0.00755727	0.00323716	0.977937	not_sig
LDL	2	118843158	G	A	0.2286	not_sig	-0.0348022	0.00540463	-0.0316108	0.0049382	0.662016	not_sig	-0.0369513	0.00615332	-0.0337024	0.00525073	0.687139	not_sig
nonHDL	2	118843158	G	A	0.9238	not_sig	-0.0368699	0.00565103	-0.0325406	0.00519471	0.57168	not_sig	-0.0387317	0.0064192	-0.033679	0.00551725	0.549452	not_sig
TC	2	118843158	G	A	0.2991	not_sig	-0.0352566	0.0054231	-0.0315488	0.00498202	0.61364	not_sig	-0.0381827	0.00615067	-0.0341937	0.00528277	0.621771	not_sig
logTG	2	119749146	C	G	0.8562	not_sig	0.0590925	0.013438	0.0356026	0.0124268	0.198114	not_sig	0.0567318	0.0154144	0.0283561	0.0134028	0.163622	not_sig
LDL	2	121306440	G	A	0.2807	not_sig	-0.0228472	0.00330148	-0.0226093	0.00300267	0.957357	not_sig	-0.025879	0.0037689	-0.0207794	0.00320094	0.301066	not_sig
nonHDL	2	121306440	G	A	0.9118	not_sig	-0.0226161	0.00345083	-0.0219976	0.0031632	0.89459	not_sig	-0.0268289	0.00392897	-0.0205964	0.00336891	0.227236	not_sig
TC	2	121306440	G	A	0.4466	not_sig	-0.0207613	0.00331247	-0.018137	0.00302929	0.557712	not_sig	-0.0253935	0.003767	-0.0175055	0.00322026	0.110483	not_sig
logTG	2	121309231	C	G	0.3328	not_sig	0.0160828	0.00375867	0.0124302	0.00343494	0.471927	not_sig	0.0180546	0.00430666	0.0124451	0.00369054	0.321307	not_sig
HDL	2	121347612	G	C	0.03502	not_sig	0.0179845	0.00388261	0.00897877	0.00359771	0.0879906	not_sig	0.0154657	0.00445612	0.00579975	0.00386634	0.100403	not_sig
LDL	2	122797791	C	G	0.02828	not_sig	-0.826648	0.158756	-0.350393	0.145484	0.026567	not_sig	-0.881389	0.176815	-0.32194	0.154316	0.01683	not_sig
TC	2	134874008	A	G	0.7231	not_sig	0.0086598	0.00419977	0.00811828	0.00382313	0.923827	not_sig	0.0114247	0.00477979	0.00821116	0.00406574	0.607587	not_sig
LDL	2	135014116	G	A	0.3159	not_sig	0.00891742	0.00389276	0.00749888	0.00354098	0.786921	not_sig	0.00565272	0.00444115	0.00713513	0.00377683	0.798745	not_sig
LDL	2	135954797	T	C	0.7629	not_sig	0.0121545	0.00371902	0.0151064	0.00338199	0.55595	not_sig	0.0165951	0.00424523	0.0184435	0.00360825	0.739374	not_sig
nonHDL	2	135954797	T	C	0.7364	not_sig	0.0106071	0.00388956	0.0145504	0.00356847	0.45378	not_sig	0.0142398	0.00442932	0.0172287	0.00380431	0.607729	not_sig
TC	2	135954797	T	C	0.3933	not_sig	0.0151385	0.00373158	0.0196601	0.00341241	0.369887	not_sig	0.0194453	0.00424356	0.0228684	0.00363053	0.538796	not_sig
HDL	2	136602491	T	G	0.2964	not_sig	0.0170028	0.00429461	0.0173903	0.00397512	0.947059	not_sig	0.0206565	0.00494753	0.0204058	0.00427893	0.969348	not_sig
TC	2	136898078	A	G	0.5502	not_sig	0.00890446	0.00376112	0.00930462	0.00343985	0.937248	not_sig	0.0116952	0.00427783	0.0109047	0.00365969	0.888027	not_sig
TC	2	144248762	G	A	0.8292	not_sig	-0.00792033	0.0032598	-0.00764117	0.00298424	0.949495	not_sig	-0.00957071	0.00370377	-0.00859549	0.00317282	0.841078	not_sig
logTG	2	146347459	A	G	0.9527	not_sig	-0.0113396	0.00333664	-0.00309664	0.00305115	0.0675247	not_sig	-0.0117976	0.00382133	-0.00415138	0.00327701	0.127738	not_sig
HDL	2	146353184	T	A	0.4232	not_sig	0.00826606	0.0034169	0.0012364	0.00316085	0.12992	not_sig	0.00644458	0.00392973	0.000671013	0.00339877	0.265152	not_sig
LDL	2	158434569	C	T	0.1397	not_sig	-0.0340728	0.00614617	-0.0119532	0.00559329	0.00760575	not_sig	-0.0350386	0.00699615	-0.00878143	0.00595069	0.00414811	not_sig
nonHDL	2	158481992	A	G	0.05472	not_sig	-0.0363556	0.00646633	-0.00937186	0.00594373	0.0020646	not_sig	-0.0375333	0.00734036	-0.00666153	0.0063159	0.00138947	not_sig
TC	2	158481992	A	G	0.136	not_sig	-0.0362445	0.00620429	-0.0118204	0.0056814	0.00359903	not_sig	-0.0378399	0.00703426	-0.00957804	0.00602595	0.00221622	not_sig
logTG	2	158508271	T	C	0.5971	not_sig	0.00946678	0.00472503	0.00796361	0.0043299	0.814057	not_sig	0.00920014	0.00540603	0.00631024	0.00464802	0.684404	not_sig
HDL	2	158514969	T	C	0.1776	not_sig	-0.0103911	0.0047889	-0.0083857	0.00443204	0.757933	not_sig	-0.00870651	0.00549941	-0.00664357	0.00476366	0.776167	not_sig
logTG	2	161118687	T	C	0.04298	not_sig	0.0066993	0.00362423	0.00637186	0.00331861	0.946726	not_sig	0.00693839	0.00414398	0.00601092	0.00356428	0.864894	not_sig
HDL	2	162966841	C	A	0.3176	not_sig	0.00515851	0.00340841	0.00634816	0.00315731	0.79736	not_sig	0.00697427	0.0039214	0.00695274	0.00339636	0.996679	not_sig
TC	2	163110536	A	G	0.2965	not_sig	-0.00340513	0.00334117	-0.00872155	0.0030507	0.238673	not_sig	-0.00322464	0.00379804	-0.00916741	0.00324527	0.232928	not_sig
LDL	2	165508389	C	T	8.89e-06	sig	-0.00897	0.0033065	-0.0191416	0.00300608	0.0224103	not_sig	-0.012275	0.00377077	-0.021	0.00320473	0.0761	not_sig
nonHDL	2	165508389	C	T	1.12e-05	sig	-0.0131	0.00345567	-0.0218425	0.00316763	0.0614019	not_sig	-0.0163226	0.00393024	-0.024	0.00337513	0.137	not_sig
TC	2	165508389	C	T	0.007733	not_sig	-0.00504057	0.00331681	-0.0125643	0.00303291	0.0932203	not_sig	-0.00819091	0.00376839	-0.0150774	0.00322444	0.163824	not_sig
HDL	2	165518799	C	G	4.28e-05	sig	0.0342	0.00514365	0.0452879	0.00479628	0.115175	not_sig	0.0380908	0.0059007	0.043	0.0051444	0.526	not_sig
logTG	2	165528876	C	T	0.0002173	not_sig	-0.0241592	0.00334265	-0.0394453	0.00305676	0.000714148	not_sig	-0.0239428	0.0038246	-0.0401	0.00328206	0.00128	not_sig
logTG	2	169700838	C	A	0.05445	not_sig	-0.00887877	0.00342701	-0.00300138	0.00312162	0.203591	not_sig	-0.010744	0.00391926	-0.00374058	0.00334728	0.173027	not_sig
LDL	2	169830661	G	A	0.9092	not_sig	-0.0237448	0.00333231	-0.0213148	0.00302894	0.588426	not_sig	-0.027358	0.00380214	-0.0206591	0.0032289	0.178099	not_sig
TC	2	169831376	G	T	0.7299	not_sig	-0.0238952	0.00335031	-0.0230099	0.00306223	0.844929	not_sig	-0.0270718	0.00380825	-0.0227355	0.00325526	0.38544	not_sig
nonHDL	2	169832362	G	A	0.623	not_sig	-0.0226696	0.00349939	-0.019632	0.00320481	0.520936	not_sig	-0.0256933	0.00398135	-0.0190091	0.00341365	0.201241	not_sig
logTG	2	171635168	G	A	0.2544	not_sig	-0.00779905	0.00339747	-0.0141846	0.00310454	0.164132	not_sig	-0.00992745	0.00389268	-0.0150733	0.00333291	0.313973	not_sig
HDL	2	174075761	G	A	0.1862	not_sig	-0.00842059	0.00338506	-0.00874002	0.00313053	0.944614	not_sig	-0.00567623	0.00389071	-0.00981676	0.00336241	0.419434	not_sig
logTG	2	180707310	T	C	0.8638	not_sig	-0.00492892	0.0035347	-0.00708873	0.00323503	0.651272	not_sig	-0.0038388	0.00404425	-0.00896332	0.00347186	0.335007	not_sig
HDL	2	188292458	C	T	0.811	not_sig	0.00741325	0.00366844	0.0111511	0.0034002	0.453644	not_sig	0.00810747	0.00420787	0.00969639	0.00365423	0.774962	not_sig
TC	2	191566439	A	G	0.465	not_sig	0.00467193	0.00331429	0.00728739	0.00303582	0.559534	not_sig	0.00440007	0.00376703	0.00884819	0.00322786	0.368591	not_sig
logTG	2	202185132	A	G	0.3372	not_sig	0.0106253	0.00327283	0.00597834	0.00299093	0.293247	not_sig	0.0108238	0.00374981	0.00529043	0.00321253	0.261135	not_sig
TC	2	202223566	A	G	0.8559	not_sig	0.00707557	0.00334371	0.00652078	0.0030593	0.902303	not_sig	0.00654074	0.00380196	0.00633728	0.00325282	0.967475	not_sig
nonHDL	2	202314833	C	T	0.7689	not_sig	0.0137495	0.00347309	0.007198	0.00318104	0.16304	not_sig	0.0134639	0.00395005	0.00860354	0.00339114	0.349188	not_sig
nonHDL	2	203271267	T	C	0.02124	not_sig	0.0176535	0.00388714	0.0228168	0.00356107	0.326028	not_sig	0.0217232	0.00443136	0.0237787	0.00379531	0.723883	not_sig
logTG	2	203431804	A	G	0.6036	not_sig	0.0196178	0.0050058	0.0173552	0.00457693	0.737995	not_sig	0.0184489	0.00574829	0.016361	0.00492679	0.782134	not_sig
LDL	2	203460202	TGGCTCACGCCTGTA	T	0.6284	not_sig	-0.0219096	0.00361209	-0.0223426	0.00328381	0.929136	not_sig	-0.0211853	0.00411243	-0.0217556	0.00349833	0.915642	not_sig
TC	2	203495058	G	A	0.7672	not_sig	-0.0248491	0.00357369	-0.0248102	0.0032606	0.993558	not_sig	-0.0260143	0.00405347	-0.0256031	0.00346246	0.938342	not_sig
HDL	2	203497786	A	C	0.6726	not_sig	-0.0155849	0.00362108	-0.0156617	0.00334427	0.987528	not_sig	-0.0167248	0.00415452	-0.0188348	0.00359182	0.700056	not_sig
HDL	2	208372913	T	G	0.3458	not_sig	0.0131439	0.00421437	0.0133051	0.00389094	0.977507	not_sig	0.0123217	0.0048439	0.0149412	0.00418065	0.681422	not_sig
TC	2	208429351	T	C	0.3991	not_sig	-0.00402282	0.00327402	-0.00518543	0.00298508	0.792448	not_sig	-0.00443649	0.00372188	-0.00419753	0.00317509	0.960935	not_sig
HDL	2	211540507	C	A	0.002356	not_sig	-0.0127759	0.00359833	-0.0189082	0.00332014	0.209125	not_sig	-0.0137648	0.00413483	-0.022	0.00357129	0.13	not_sig
HDL	2	212274447	G	A	0.09377	not_sig	-0.00582385	0.0038599	-0.00975252	0.00357373	0.4539	not_sig	-0.00926826	0.00444419	-0.00943029	0.00384528	0.977943	not_sig
HDL	2	215377588	A	T	0.4921	not_sig	0.0079478	0.00334973	0.00763825	0.00309383	0.945727	not_sig	0.0130541	0.00384675	0.00837949	0.0033285	0.356802	not_sig
nonHDL	2	216300185	C	T	0.453	not_sig	0.0153161	0.00385659	0.0130828	0.00354347	0.668929	not_sig	0.0129208	0.00439059	0.0135251	0.00377675	0.916669	not_sig
TC	2	216300185	C	T	0.1171	not_sig	0.0142692	0.00370307	0.0124728	0.00339238	0.719814	not_sig	0.0114821	0.00421154	0.0127053	0.00360858	0.824973	not_sig
LDL	2	216300482	T	A	0.2402	not_sig	0.0146156	0.00368991	0.0135024	0.00336077	0.823024	not_sig	0.0120732	0.00421232	0.0145072	0.00358453	0.659027	not_sig
LDL	2	219138170	T	G	0.2521	not_sig	-0.0103486	0.00339233	-0.0085795	0.00307821	0.698562	not_sig	-0.0102164	0.00386394	-0.00908022	0.00328156	0.822178	not_sig
logTG	2	219142773	C	T	0.4055	not_sig	-0.0103516	0.00333219	-0.0120158	0.00304191	0.71149	not_sig	-0.0122682	0.00380913	-0.0125623	0.00326642	0.953129	not_sig
nonHDL	2	219155907	A	T	0.7934	not_sig	0.00954869	0.00346767	0.0108763	0.00317841	0.777168	not_sig	0.0127134	0.00393984	0.0113264	0.0033864	0.788909	not_sig
TC	2	219162720	C	CA	0.4237	not_sig	-0.00826943	0.00336838	-0.00974802	0.00308258	0.745391	not_sig	-0.00820127	0.00382127	-0.00952084	0.00327735	0.792674	not_sig
HDL	2	219699999	G	A	0.2145	not_sig	-0.0856637	0.00859837	-0.0757828	0.00792282	0.396745	not_sig	-0.0855045	0.00996405	-0.0684398	0.00857072	0.192934	not_sig
LDL	2	219699999	G	A	0.003788	not_sig	0.00440902	0.00835345	0.0306062	0.00756427	0.0197496	not_sig	0.00658993	0.00960301	0.0275846	0.0081168	0.0940718	not_sig
logTG	2	219699999	G	A	0.6903	not_sig	0.0691457	0.00840176	0.0809002	0.00765392	0.299692	not_sig	0.0667948	0.00969141	0.0800116	0.00827124	0.298254	not_sig
nonHDL	2	219699999	G	A	0.2723	not_sig	0.0181843	0.0087343	0.0409462	0.00797422	0.0536166	not_sig	0.0211875	0.0100166	0.0416989	0.00854713	0.11829	not_sig
logTG	2	227094758	A	G	7.59e-07	sig	0.037	0.00342306	0.0277697	0.00312322	0.0462149	not_sig	0.0380851	0.0039086	0.027	0.00335072	0.0311	not_sig
HDL	2	227101309	T	C	8.86e-07	sig	-0.0437	0.00350257	-0.0267989	0.00323037	0.000378353	not_sig	-0.0472261	0.00401748	-0.0246	0.00347047	1.85e-05	sig
nonHDL	2	227103717	A	C	0.7407	not_sig	0.00939874	0.00356219	0.012635	0.00325427	0.501194	not_sig	0.0147347	0.00404379	0.0132565	0.003464	0.780726	not_sig
logTG	2	227605895	T	C	0.3981	not_sig	0.0236126	0.00795338	0.0139632	0.00726779	0.369127	not_sig	0.0231022	0.00910697	0.0140544	0.00780848	0.44947	not_sig
nonHDL	2	228451050	G	A	0.1772	not_sig	-0.0700981	0.0146992	-0.0345887	0.0134812	0.0742155	not_sig	-0.0668549	0.0167092	-0.034018	0.0143888	0.135372	not_sig
HDL	2	228565656	G	A	0.4215	not_sig	0.00922022	0.00347597	0.00840185	0.00320991	0.8623	not_sig	0.0104382	0.0039968	0.00617002	0.00345141	0.417672	not_sig
HDL	2	230019348	G	A	0.7338	not_sig	-0.00828878	0.00347626	-0.0114373	0.00322744	0.505675	not_sig	-0.00765842	0.00398712	-0.013533	0.0034692	0.265024	not_sig
TC	2	234144942	C	T	0.2843	not_sig	0.00395761	0.00361532	0.00941521	0.00329409	0.263165	not_sig	0.00847622	0.00411796	0.0107048	0.00350352	0.679372	not_sig
logTG	2	234512095	C	T	0.9523	not_sig	0.017932	0.00638905	0.0178018	0.00581532	0.987938	not_sig	0.014219	0.00733823	0.0179185	0.00626122	0.700555	not_sig
LDL	2	234679549	T	C	0.7026	not_sig	0.0180357	0.00516553	0.026424	0.00470159	0.22849	not_sig	0.0189028	0.00590736	0.0245255	0.00502374	0.467186	not_sig
nonHDL	2	234679549	T	C	0.8092	not_sig	0.0225529	0.00539984	0.030363	0.00496141	0.285518	not_sig	0.0225636	0.00616033	0.0284336	0.00529809	0.468806	not_sig
TC	2	234679549	T	C	0.2022	not_sig	0.0209768	0.00518343	0.027641	0.00474356	0.341559	not_sig	0.0224163	0.00590546	0.0262414	0.00505444	0.621697	not_sig
HDL	2	242395674	G	A	0.2561	not_sig	0.0104372	0.00339549	0.0118475	0.00313839	0.759712	not_sig	0.00904252	0.00389932	0.0112252	0.00337246	0.671168	not_sig
logTG	3	4762734	A	T	0.914	not_sig	0.0110347	0.00329089	0.0110217	0.0030126	0.997667	not_sig	0.0111235	0.00376844	0.010426	0.00323503	0.888005	not_sig
logTG	3	9498143	G	A	0.435	not_sig	0.0109309	0.00541686	0.0138072	0.00495012	0.694281	not_sig	0.0112485	0.00621976	0.012452	0.00531536	0.88274	not_sig
nonHDL	3	11886116	C	T	0.7472	not_sig	-0.0694567	0.0266558	-0.0404275	0.0239978	0.41702	not_sig	-0.0573354	0.0301595	-0.0286198	0.0253384	0.464784	not_sig
TC	3	12266855	G	A	0.39	not_sig	-0.0185083	0.00328305	-0.0126967	0.00299708	0.189869	not_sig	-0.0249035	0.00372799	-0.0144387	0.0031845	0.032334	not_sig
LDL	3	12327431	T	G	0.01315	not_sig	-0.0264322	0.00373282	-0.0153952	0.00338951	0.0281607	not_sig	-0.0292893	0.00424769	-0.0161802	0.00360838	0.0183478	not_sig
HDL	3	12360494	C	T	0.06116	not_sig	-0.0508594	0.0106509	-0.040553	0.0097543	0.474245	not_sig	-0.0629091	0.0122102	-0.036081	0.0104788	0.0945363	not_sig
logTG	3	12383714	G	A	0.2655	not_sig	-0.0333069	0.00499156	-0.0186	0.00458542	0.0295703	not_sig	-0.0394315	0.00571702	-0.0160915	0.00491843	0.00191337	not_sig
nonHDL	3	12445807	C	A	0.1538	not_sig	0.0166573	0.00350911	0.0138801	0.00320827	0.558074	not_sig	0.0194072	0.00398669	0.0140319	0.0034159	0.304568	not_sig
TC	3	12793024	G	A	0.393	not_sig	-0.0255843	0.00565593	-0.0103717	0.00515904	0.0462972	not_sig	-0.028841	0.0064128	-0.0111995	0.00547469	0.0359054	not_sig
LDL	3	12856856	A	G	0.4659	not_sig	-0.0102538	0.00334533	-0.00517882	0.00304375	0.260503	not_sig	-0.0115987	0.0038171	-0.00609429	0.00324465	0.270571	not_sig
logTG	3	15667215	C	A	0.5742	not_sig	0.00860919	0.00341785	0.00625366	0.00312513	0.61003	not_sig	0.00852388	0.00391603	0.0063972	0.0033564	0.67926	not_sig
HDL	3	15782711	A	C	0.3969	not_sig	0.0139939	0.00357217	0.0118002	0.00330741	0.651376	not_sig	0.0152864	0.00410623	0.0128376	0.00355751	0.65128	not_sig
logTG	3	23368583	G	A	0.2155	not_sig	0.01128	0.00328171	0.00366026	0.00300305	0.0858537	not_sig	0.0124777	0.0037553	0.0021489	0.00322214	0.0363379	not_sig
HDL	3	24302811	G	A	0.8203	not_sig	-0.0213755	0.0054256	-0.0152517	0.00503058	0.406563	not_sig	-0.0237793	0.00624609	-0.0163611	0.00540942	0.36799	not_sig
LDL	3	24520283	A	G	0.1777	not_sig	-0.0123503	0.00363062	-0.00934698	0.00329524	0.539061	not_sig	-0.0125291	0.00414196	-0.0110053	0.00351585	0.778521	not_sig
logTG	3	24520283	A	G	0.9579	not_sig	-0.0164644	0.00365142	-0.0152557	0.0033341	0.806364	not_sig	-0.0146402	0.00417929	-0.0150383	0.00358244	0.942184	not_sig
nonHDL	3	24520283	A	G	0.1144	not_sig	-0.0146159	0.0037953	-0.0116159	0.00347333	0.558736	not_sig	-0.0141984	0.00431787	-0.0138288	0.00370276	0.948044	not_sig
TC	3	24520283	A	G	0.07239	not_sig	-0.0136456	0.00364293	-0.00844997	0.00332474	0.290797	not_sig	-0.0137015	0.00414033	-0.0115928	0.00353736	0.697797	not_sig
nonHDL	3	32514647	T	A	0.606	not_sig	-0.032877	0.00652611	-0.0329829	0.00594794	0.990405	not_sig	-0.0363077	0.00742095	-0.0332098	0.00632118	0.749982	not_sig
LDL	3	32533010	C	T	0.6861	not_sig	-0.0323088	0.00570512	-0.0286031	0.00517436	0.629474	not_sig	-0.0342341	0.00650675	-0.0276265	0.00550646	0.436982	not_sig
TC	3	32533010	C	T	0.5199	not_sig	-0.0302066	0.00572362	-0.0279102	0.0052195	0.766253	not_sig	-0.030877	0.00650383	-0.0272773	0.0055389	0.672635	not_sig
HDL	3	36960660	C	A	0.3521	not_sig	0.0053247	0.00340982	0.00897266	0.00314797	0.43055	not_sig	0.00290395	0.00391621	0.00818704	0.00338563	0.306146	not_sig
logTG	3	37025661	T	C	0.9558	not_sig	-0.0124219	0.00328836	-0.00728206	0.00299911	0.246839	not_sig	-0.0103852	0.00376294	-0.00777464	0.00321906	0.59706	not_sig
HDL	3	47045846	C	T	0.8196	not_sig	-0.0128632	0.00438664	-0.00717307	0.00405682	0.339592	not_sig	-0.0120504	0.00504132	-0.00804307	0.00435432	0.546362	not_sig
TC	3	47955346	GT	G	0.1672	not_sig	-0.0555907	0.0134096	-0.0295964	0.0122125	0.150673	not_sig	-0.0530633	0.0152116	-0.0291204	0.0129826	0.229938	not_sig
logTG	3	49145304	A	G	0.5699	not_sig	0.0123311	0.00392992	0.00444827	0.00358302	0.137181	not_sig	0.0144716	0.00449034	0.00472151	0.00384321	0.0980936	not_sig
HDL	3	50038664	G	A	0.1385	not_sig	-0.015736	0.0033492	-0.0165415	0.0030985	0.85949	not_sig	-0.0168651	0.00384422	-0.016542	0.00333108	0.949201	not_sig
TC	3	50219991	C	G	0.9582	not_sig	-0.0145154	0.00520014	-0.0148785	0.00475999	0.958811	not_sig	-0.011183	0.00589442	-0.0142184	0.0050626	0.695263	not_sig
nonHDL	3	50374293	A	G	0.2234	not_sig	-0.0109387	0.00491903	-0.00711214	0.00453198	0.56617	not_sig	-0.00672225	0.00558268	-0.00684051	0.00482873	0.987181	not_sig
TC	3	52063885	C	T	0.6352	not_sig	-0.0333699	0.013381	-0.0145332	0.0121242	0.295524	not_sig	-0.0358694	0.0152224	-0.0116362	0.0129309	0.223751	not_sig
HDL	3	52124388	C	T	0.8957	not_sig	-0.0510035	0.0135847	-0.0284571	0.0124635	0.22007	not_sig	-0.0430768	0.0156474	-0.0265488	0.0134425	0.421733	not_sig
logTG	3	52346240	T	G	0.3827	not_sig	-0.0193439	0.00424519	-0.0245825	0.00387679	0.360854	not_sig	-0.0224519	0.00485952	-0.0245712	0.00416129	0.739759	not_sig
LDL	3	52558133	T	C	0.6907	not_sig	0.00685382	0.00326494	0.0103575	0.00297329	0.426253	not_sig	0.00893146	0.00372644	0.0115128	0.00317025	0.596763	not_sig
TC	3	52572056	A	G	0.915	not_sig	0.00382512	0.003264	0.00975237	0.00299016	0.179363	not_sig	0.00686208	0.00371178	0.0114842	0.00317885	0.342921	not_sig
nonHDL	3	52584787	T	C	0.8967	not_sig	0.0035324	0.00348532	0.00942033	0.00319972	0.212068	not_sig	0.00449606	0.00396768	0.00978958	0.00340861	0.310212	not_sig
HDL	3	52838654	C	T	0.875	not_sig	0.0211424	0.00510334	0.0205251	0.00474627	0.929222	not_sig	0.0250622	0.00586934	0.0241648	0.00510401	0.9079	not_sig
logTG	3	57533658	C	T	0.6544	not_sig	-0.00666674	0.00428718	-0.00941696	0.00391403	0.634738	not_sig	-0.00570238	0.00489501	-0.0120969	0.00420278	0.320287	not_sig
HDL	3	57596105	T	C	0.5051	not_sig	-0.00695984	0.00408411	-0.00402233	0.00377435	0.596327	not_sig	-0.00426008	0.00468793	-0.00426075	0.00405908	0.999914	not_sig
LDL	3	58391293	C	G	0.8957	not_sig	-0.0378104	0.00590311	-0.0323186	0.00538528	0.490697	not_sig	-0.0442914	0.00671321	-0.0356248	0.00572898	0.324774	not_sig
nonHDL	3	58391293	C	G	0.4107	not_sig	-0.0332257	0.00616822	-0.0289645	0.00566861	0.610004	not_sig	-0.0411011	0.00699851	-0.0317506	0.0060267	0.310009	not_sig
TC	3	58391293	C	G	0.9214	not_sig	-0.0370197	0.00592213	-0.0315431	0.00543267	0.49438	not_sig	-0.0455127	0.00670899	-0.0352004	0.00576328	0.242342	not_sig
HDL	3	62459819	A	C	0.6964	not_sig	0.0210238	0.0057301	0.0117536	0.00532069	0.234513	not_sig	0.0190553	0.00656585	0.00563549	0.00572	0.122265	not_sig
logTG	3	66868609	C	T	0.7082	not_sig	0.0102766	0.00364413	0.00828564	0.0033336	0.686043	not_sig	0.0107124	0.00417491	0.00974586	0.00358002	0.860119	not_sig
HDL	3	66874481	A	C	0.2751	not_sig	-0.0126795	0.00374593	-0.00740257	0.00346748	0.299898	not_sig	-0.0124795	0.00431118	-0.00853855	0.00372931	0.488149	not_sig
HDL	3	69803691	T	A	0.02567	not_sig	0.00798817	0.0040079	0.00623205	0.00369187	0.746568	not_sig	0.00595925	0.00460388	0.00517366	0.00396842	0.896879	not_sig
LDL	3	69837571	C	G	0.777	not_sig	0.0139177	0.00342357	0.0113646	0.00311202	0.580024	not_sig	0.0104191	0.00390417	0.0124974	0.00331751	0.684184	not_sig
nonHDL	3	69837571	C	G	0.3553	not_sig	0.0172255	0.00357889	0.011678	0.00328209	0.251973	not_sig	0.0137172	0.0040704	0.0127612	0.00349679	0.858219	not_sig
TC	3	69837571	C	G	0.5595	not_sig	0.0144973	0.00343514	0.0118396	0.00313997	0.566884	not_sig	0.0110796	0.00390243	0.0130669	0.00333795	0.697975	not_sig
logTG	3	69870595	A	G	0.04117	not_sig	0.0063488	0.00329628	0.00686266	0.00301806	0.90821	not_sig	0.00771912	0.0037728	0.00673977	0.00324243	0.843508	not_sig
HDL	3	70508703	G	C	0.5573	not_sig	-0.00885813	0.00340214	-0.00790608	0.00313679	0.836552	not_sig	-0.0107563	0.0039153	-0.00753038	0.00337203	0.531303	not_sig
HDL	3	71532738	C	T	0.3684	not_sig	0.0137842	0.00335791	0.00898006	0.00309986	0.291809	not_sig	0.0156353	0.00386608	0.00926029	0.00333503	0.210565	not_sig
HDL	3	87037543	A	G	0.6532	not_sig	0.0179195	0.00583932	0.0138463	0.00540523	0.607733	not_sig	0.0154787	0.0067044	0.0137227	0.00581279	0.842701	not_sig
logTG	3	87037543	A	G	0.1899	not_sig	-0.0155005	0.00570972	-0.0185056	0.0052227	0.696962	not_sig	-0.0178474	0.00652889	-0.0198417	0.00560685	0.816252	not_sig
LDL	3	100465609	A	G	0.9767	not_sig	-0.00272606	0.00339316	-0.00539848	0.00308666	0.559075	not_sig	-0.00631079	0.00386817	-0.00414741	0.00328989	0.669234	not_sig
HDL	3	114753078	A	C	0.7251	not_sig	-0.0142246	0.00565581	-0.0195646	0.00523869	0.487308	not_sig	-0.0125657	0.00650314	-0.0223474	0.00563253	0.254246	not_sig
HDL	3	119529113	G	T	0.2453	not_sig	-0.0186234	0.00684294	-0.0414949	0.00626618	0.0134426	not_sig	-0.0115492	0.00790266	-0.0393513	0.00673563	0.00725668	not_sig
TC	3	119529113	G	T	0.5185	not_sig	-0.0350824	0.00666685	-0.0367698	0.00603331	0.850735	not_sig	-0.026231	0.00761232	-0.0367605	0.00641209	0.28877	not_sig
LDL	3	119536429	G	A	0.1158	not_sig	-0.0196261	0.003955	-0.0115763	0.00358407	0.130439	not_sig	-0.0208188	0.00451183	-0.0139982	0.00381962	0.247299	not_sig
nonHDL	3	119536429	G	A	0.05305	not_sig	-0.0237923	0.0041328	-0.0132569	0.00377905	0.0592289	not_sig	-0.0252069	0.00470048	-0.0154766	0.00402437	0.114844	not_sig
LDL	3	122285218	CT	C	1.02e-05	sig	0.0116	0.00353584	0.0221121	0.00320989	0.0274331	not_sig	0.0130461	0.00403618	0.0243	0.00342408	0.0328	not_sig
nonHDL	3	122285218	CT	C	0.0002741	not_sig	0.0114589	0.00369494	0.0225868	0.00338503	0.0259609	not_sig	0.013019	0.00420702	0.024122	0.00360851	0.0445677	not_sig
TC	3	122285218	CT	C	2.7e-05	sig	0.0108	0.00354743	0.0216986	0.00323865	0.0226971	not_sig	0.0126609	0.00403408	0.0238	0.00344523	0.0356	not_sig
HDL	3	123065778	A	G	0.4591	not_sig	-0.00705515	0.00388404	-0.0110166	0.00358599	0.452384	not_sig	-0.0110335	0.00446073	-0.0128058	0.00385698	0.763137	not_sig
LDL	3	123068744	C	T	0.0003632	not_sig	-0.00159364	0.00376231	-0.00824466	0.00341869	0.189532	not_sig	-0.00470244	0.00428953	-0.00943352	0.00364621	0.399415	not_sig
TC	3	123068744	C	T	0.001573	not_sig	-0.00231372	0.00377477	-0.012042	0.00344941	0.0564219	not_sig	-0.00539337	0.00428738	-0.0136973	0.00366865	0.140037	not_sig
LDL	3	124959834	C	T	0.06142	not_sig	0.0110337	0.00344716	0.00490597	0.00312627	0.186698	not_sig	0.0124611	0.00392996	0.00596682	0.00333678	0.206538	not_sig
TC	3	124959834	C	T	0.1301	not_sig	0.0111714	0.0034589	0.00681493	0.00315428	0.350708	not_sig	0.012904	0.00392859	0.00727812	0.00335724	0.274983	not_sig
TC	3	126058362	A	G	0.4271	not_sig	0.00840597	0.00383767	0.0104501	0.00350286	0.693219	not_sig	0.0089994	0.0043566	0.0109423	0.00372283	0.733882	not_sig
LDL	3	126060315	T	C	0.7174	not_sig	0.0113991	0.00383927	0.0101948	0.00348362	0.81581	not_sig	0.0111728	0.0043748	0.0113523	0.0037129	0.974976	not_sig
LDL	3	127281890	G	A	0.738	not_sig	0.0116028	0.00524612	0.00450252	0.00477087	0.315344	not_sig	0.00928771	0.00600424	0.00367453	0.00508944	0.474547	not_sig
TC	3	127292333	G	A	0.8628	not_sig	0.0113586	0.00525951	0.00495207	0.00481103	0.367444	not_sig	0.0124646	0.00599952	0.00493656	0.00511747	0.338428	not_sig
LDL	3	129274936	A	G	0.4339	not_sig	0.0175388	0.00487464	0.0142223	0.00444776	0.614272	not_sig	0.0158911	0.00556544	0.0148593	0.00473883	0.887445	not_sig
TC	3	129278182	A	G	0.5832	not_sig	0.0182525	0.00486013	0.0173816	0.00446137	0.89469	not_sig	0.0180977	0.00553112	0.0196272	0.00473916	0.83323	not_sig
HDL	3	129296847	A	G	0.4907	not_sig	0.00816505	0.00420434	0.0109653	0.00389298	0.624093	not_sig	0.00794858	0.00483408	0.0107752	0.00418253	0.657475	not_sig
nonHDL	3	132119691	A	T	0.04696	not_sig	-0.0246736	0.00568261	-0.0321845	0.00522277	0.329141	not_sig	-0.0257803	0.00642945	-0.0342822	0.00554737	0.31541	not_sig
LDL	3	132183991	G	A	0.9418	not_sig	-0.0330425	0.00714908	-0.038876	0.00646698	0.543976	not_sig	-0.0332086	0.00814321	-0.0396538	0.00688684	0.54452	not_sig
TC	3	132183991	G	A	0.4468	not_sig	-0.0344748	0.00717339	-0.0421301	0.00652376	0.428538	not_sig	-0.0336048	0.00813946	-0.0446356	0.00692704	0.300713	not_sig
HDL	3	133478557	T	G	0.4567	not_sig	-0.0113714	0.00335776	-0.0120614	0.0031076	0.879792	not_sig	-0.0143644	0.00385663	-0.0142722	0.00334481	0.985559	not_sig
LDL	3	133490334	A	C	0.5978	not_sig	-0.0111519	0.00411189	-0.00763808	0.0037493	0.526601	not_sig	-0.0139821	0.00469337	-0.00954385	0.00399793	0.470387	not_sig
TC	3	133490334	A	C	0.6015	not_sig	-0.0120692	0.00412593	-0.0115895	0.00378242	0.931521	not_sig	-0.0158704	0.00469148	-0.0139709	0.00402207	0.757907	not_sig
HDL	3	135932359	C	T	0.2596	not_sig	-0.0172525	0.00398413	-0.0210331	0.00369391	0.485307	not_sig	-0.0185256	0.00456507	-0.0195599	0.00396143	0.863763	not_sig
nonHDL	3	135932359	C	T	0.4894	not_sig	0.0191951	0.00404692	0.0186311	0.00371815	0.918028	not_sig	0.0239851	0.00458945	0.0207999	0.00395064	0.597887	not_sig
logTG	3	135956305	A	C	0.06422	not_sig	0.0224902	0.003864	0.024731	0.00353361	0.667821	not_sig	0.0264103	0.00440836	0.0247915	0.00378569	0.77998	not_sig
LDL	3	136020541	T	C	0.9068	not_sig	0.0152459	0.00376476	0.0125409	0.003418	0.593735	not_sig	0.0182183	0.00428117	0.0145272	0.00363731	0.509984	not_sig
TC	3	136450593	C	T	0.04892	not_sig	0.0108957	0.00348121	0.0117026	0.00318876	0.863906	not_sig	0.0135667	0.00395839	0.0134693	0.00339356	0.985064	not_sig
nonHDL	3	142019751	A	G	0.2153	not_sig	-0.0124092	0.00505665	-0.018543	0.00461259	0.368834	not_sig	-0.0137656	0.00573867	-0.0214451	0.00491554	0.308146	not_sig
logTG	3	142078759	C	T	0.7722	not_sig	-0.013654	0.00487672	-0.0152162	0.00443266	0.812102	not_sig	-0.0148358	0.00557087	-0.017237	0.00476056	0.742473	not_sig
TC	3	142078759	C	T	0.1727	not_sig	-0.00883233	0.0048647	-0.0218861	0.00442035	0.0464305	not_sig	-0.0114272	0.00551854	-0.025158	0.00470095	0.0575294	not_sig
LDL	3	142159885	G	A	0.4243	not_sig	-0.00889186	0.00481012	-0.0180537	0.0043484	0.156531	not_sig	-0.0095981	0.00547776	-0.0210237	0.00463713	0.11041	not_sig
nonHDL	3	142649110	C	G	0.08833	not_sig	-0.0128514	0.00359351	-0.0159741	0.00328567	0.520165	not_sig	-0.013696	0.00407989	-0.0164456	0.00349895	0.607966	not_sig
TC	3	142649110	C	G	0.03867	not_sig	-0.0139987	0.00344792	-0.0163386	0.00314335	0.615032	not_sig	-0.0164922	0.00391059	-0.0162152	0.00334076	0.956937	not_sig
LDL	3	142660706	G	A	0.609	not_sig	-0.0143872	0.00341413	-0.0136287	0.0030924	0.86886	not_sig	-0.0147378	0.00388604	-0.0136344	0.00329629	0.828119	not_sig
logTG	3	142660706	G	A	0.003885	not_sig	-0.0100527	0.00343334	-0.0120579	0.00312886	0.665099	not_sig	-0.00901916	0.00392068	-0.0121173	0.00335891	0.54734	not_sig
TC	3	145924454	C	A	0.9815	not_sig	-0.044268	0.0203681	-0.0445482	0.0189087	0.991935	not_sig	-0.0217505	0.0230892	-0.0576513	0.0199858	0.238453	not_sig
nonHDL	3	147076791	T	G	0.2091	not_sig	-0.0124837	0.00397589	-0.0128094	0.00362623	0.951607	not_sig	-0.0128482	0.00453154	-0.0118793	0.00385903	0.870346	not_sig
TC	3	147076791	T	G	0.9853	not_sig	-0.0128957	0.00381563	-0.00967552	0.00347204	0.531359	not_sig	-0.012563	0.00434376	-0.00891707	0.00368793	0.521128	not_sig
HDL	3	150066540	T	A	0.2137	not_sig	-0.0429722	0.00719616	-0.0313784	0.00664716	0.235326	not_sig	-0.0414546	0.00830012	-0.0318893	0.00717143	0.381889	not_sig
logTG	3	150066540	T	A	0.5925	not_sig	0.0371751	0.00703596	0.0398123	0.00642591	0.78138	not_sig	0.0409494	0.00807655	0.0433499	0.00692297	0.820982	not_sig
HDL	3	152016969	C	T	0.234	not_sig	0.00832838	0.00363591	0.00867	0.00336949	0.944905	not_sig	0.00561506	0.00417438	0.00877026	0.00362528	0.567151	not_sig
HDL	3	153851061	A	G	0.01078	not_sig	-0.00574034	0.00517555	-0.0128126	0.00478592	0.314388	not_sig	-0.00666805	0.00595317	-0.0138536	0.00514232	0.359704	not_sig
nonHDL	3	155532694	A	T	0.8298	not_sig	0.00846677	0.00392493	0.00615923	0.00358961	0.663532	not_sig	0.0113206	0.00446733	0.00821897	0.0038248	0.596913	not_sig
logTG	3	155535351	G	C	0.2836	not_sig	0.00817304	0.00367415	0.00991688	0.00336066	0.725448	not_sig	0.0075952	0.00420633	0.00787555	0.00360892	0.959548	not_sig
LDL	3	155546124	C	T	0.6345	not_sig	0.0949265	0.0226546	0.0789212	0.0203744	0.598366	not_sig	0.106505	0.0259998	0.0637554	0.0218108	0.206545	not_sig
TC	3	155560978	T	C	0.6249	not_sig	0.00545016	0.00376256	0.0065027	0.00343611	0.835904	not_sig	0.00875804	0.00427732	0.00959742	0.0036545	0.881072	not_sig
HDL	3	156244888	C	T	0.2134	not_sig	0.0146208	0.00454662	0.0155166	0.00419526	0.884555	not_sig	0.0175652	0.00523167	0.0170127	0.00450917	0.936072	not_sig
HDL	3	156797941	T	C	0.01365	not_sig	0.019478	0.00342508	0.0106076	0.00317146	0.0567046	not_sig	0.0205558	0.0039355	0.0100062	0.00340781	0.0421484	not_sig
logTG	3	156797941	T	C	0.2788	not_sig	-0.0152497	0.00334826	-0.00995098	0.00306561	0.241829	not_sig	-0.0149675	0.00383044	-0.00993368	0.00328916	0.317423	not_sig
LDL	3	160028014	T	C	0.7656	not_sig	-0.0122358	0.00326192	-0.00792435	0.00296596	0.326768	not_sig	-0.0164732	0.00371906	-0.00785916	0.00316267	0.0768443	not_sig
TC	3	160029964	G	C	0.9746	not_sig	-0.0145101	0.00327298	-0.0101747	0.00299278	0.326963	not_sig	-0.0178737	0.00371757	-0.0109569	0.00318236	0.156391	not_sig
nonHDL	3	160063356	A	C	0.8174	not_sig	-0.0122411	0.00340774	-0.00659017	0.00312544	0.220397	not_sig	-0.0153706	0.0038757	-0.0075047	0.00333006	0.122687	not_sig
TC	3	170727218	G	A	0.1859	not_sig	0.0163789	0.0055194	0.0181725	0.00503492	0.809752	not_sig	0.0175162	0.00627474	0.0202844	0.00536466	0.736688	not_sig
logTG	3	170732300	G	A	0.05852	not_sig	0.0177125	0.00496009	0.0197538	0.00452472	0.76046	not_sig	0.0156994	0.00568437	0.0209124	0.00486963	0.484949	not_sig
nonHDL	3	170732945	A	G	0.1389	not_sig	0.0146118	0.00575306	0.0202039	0.00525374	0.471679	not_sig	0.0157934	0.00655397	0.0205	0.00561075	0.584359	not_sig
LDL	3	170758329	T	G	0.1236	not_sig	0.0155552	0.00608488	0.0207148	0.00552994	0.529184	not_sig	0.0163079	0.00694855	0.0193859	0.00590732	0.735048	not_sig
LDL	3	171536255	T	G	0.1187	not_sig	0.00678722	0.00441399	0.00877911	0.0040022	0.73745	not_sig	0.00739004	0.00504464	0.00898121	0.00426833	0.809205	not_sig
HDL	3	171959684	A	G	0.5063	not_sig	-0.00782276	0.00334683	-0.00764489	0.00309865	0.968807	not_sig	-0.0102877	0.00384506	-0.00930785	0.00333186	0.846861	not_sig
logTG	3	172294500	G	A	0.1282	not_sig	0.056702	0.00982642	0.0470215	0.00906788	0.467843	not_sig	0.0433298	0.0112938	0.039084	0.00974577	0.775333	not_sig
TC	3	185820283	A	G	0.5604	not_sig	0.0170282	0.00476589	0.00717808	0.0043461	0.125676	not_sig	0.0194345	0.00540678	0.00446437	0.00461481	0.0347081	not_sig
HDL	3	185824004	T	C	0.9304	not_sig	0.0301512	0.00488312	0.0230629	0.00451077	0.284966	not_sig	0.0314126	0.00560195	0.0227188	0.00484319	0.239103	not_sig
HDL	3	195298892	T	C	0.2834	not_sig	-0.0209543	0.00973135	-0.0318914	0.00895703	0.406972	not_sig	-0.0182216	0.0111695	-0.038903	0.00961948	0.15947	not_sig
LDL	3	195942080	T	TG	0.4745	not_sig	-0.0115675	0.00334479	-0.0109534	0.00303873	0.891619	not_sig	-0.0112696	0.00380906	-0.00902576	0.00323937	0.652734	not_sig
TC	3	195942080	T	TG	0.6087	not_sig	-0.010275	0.00335577	-0.0133326	0.00306597	0.499967	not_sig	-0.00943315	0.00380733	-0.0115656	0.00325919	0.669638	not_sig
HDL	3	196198533	T	C	0.9172	not_sig	0.00891865	0.00370899	0.0102457	0.00342756	0.792162	not_sig	0.0104309	0.00426432	0.0114476	0.0036875	0.856493	not_sig
logTG	4	951947	T	C	0.4487	not_sig	0.0111831	0.00431707	0.0121857	0.00394467	0.8635	not_sig	0.00914493	0.00494309	0.0127971	0.00423275	0.573608	not_sig
HDL	4	965720	A	G	0.3339	not_sig	0.0138213	0.00336378	0.0118857	0.00310832	0.671718	not_sig	0.016413	0.00385956	0.0111931	0.00334085	0.305182	not_sig
nonHDL	4	965720	A	G	0.1418	not_sig	-0.00105907	0.00341677	-0.00807062	0.00312856	0.129097	not_sig	-0.00331326	0.00388007	-0.00941316	0.00333167	0.23169	not_sig
HDL	4	2260812	T	C	0.7071	not_sig	0.0129863	0.00495671	0.0109461	0.00457415	0.761632	not_sig	0.0169533	0.00568435	0.0136308	0.00491857	0.65761	not_sig
logTG	4	2888622	G	A	0.1787	not_sig	0.00741826	0.00336419	0.0101359	0.00307707	0.550021	not_sig	0.00565143	0.00385359	0.013323	0.00330228	0.129569	not_sig
nonHDL	4	2888622	G	A	0.1689	not_sig	0.00663245	0.00349514	0.00888617	0.00320474	0.633655	not_sig	0.00831657	0.00397999	0.0111966	0.00341356	0.581789	not_sig
HDL	4	3241845	C	T	0.1251	not_sig	-0.0132481	0.00637678	-0.00808059	0.00588583	0.550418	not_sig	-0.00835751	0.00734648	-0.0125482	0.00632427	0.664653	not_sig
LDL	4	3443931	A	G	0.001743	not_sig	-0.016807	0.00337594	-0.0205889	0.00306186	0.405358	not_sig	-0.0203585	0.00385989	-0.022962	0.00326925	0.60578	not_sig
logTG	4	3443931	A	G	0.2961	not_sig	-0.0230242	0.00339481	-0.022446	0.00309813	0.899609	not_sig	-0.0268431	0.00389426	-0.0237635	0.00333138	0.54678	not_sig
nonHDL	4	3443931	A	G	0.04955	not_sig	-0.0197153	0.00352641	-0.0235114	0.00322613	0.425777	not_sig	-0.0242963	0.00402166	-0.0253312	0.00344195	0.84457	not_sig
TC	4	3443931	A	G	0.007299	not_sig	-0.0181619	0.00338687	-0.0229768	0.00308956	0.292248	not_sig	-0.0232351	0.00385788	-0.0250295	0.00328954	0.722665	not_sig
HDL	4	4990298	A	G	0.0003197	not_sig	0.00391159	0.00336627	0.011186	0.00310863	0.11139	not_sig	0.00296994	0.0038663	0.0136466	0.00334087	0.0361529	not_sig
logTG	4	4990298	A	G	0.0003643	not_sig	-0.00675814	0.00328941	-0.0168119	0.00300476	0.0236426	not_sig	-0.00867375	0.00376109	-0.0185047	0.00322439	0.0466041	not_sig
nonHDL	4	7219933	T	G	0.4229	not_sig	0.010619	0.00349154	0.0117339	0.0031985	0.813353	not_sig	0.00887993	0.00397393	0.0128204	0.00340582	0.45027	not_sig
LDL	4	7222253	G	A	0.5597	not_sig	0.0121109	0.00334682	0.0123542	0.00304214	0.95699	not_sig	0.0110516	0.00381999	0.0132372	0.00324132	0.661768	not_sig
TC	4	7223319	T	G	0.298	not_sig	0.0113134	0.00336478	0.0110294	0.00307524	0.950183	not_sig	0.0103081	0.00382553	0.0123314	0.00326736	0.686742	not_sig
LDL	4	15028043	G	C	0.9001	not_sig	0.00515586	0.00341204	0.00619072	0.00309771	0.82184	not_sig	0.0040302	0.00389774	0.00706983	0.00330633	0.550952	not_sig
nonHDL	4	17880416	A	C	0.963	not_sig	0.0192086	0.00493378	0.0131956	0.00452537	0.367783	not_sig	0.0173781	0.00563116	0.0131385	0.00482877	0.566578	not_sig
logTG	4	17884986	T	C	0.3014	not_sig	0.0242396	0.00475343	0.019029	0.00435453	0.417638	not_sig	0.0225097	0.00545937	0.0185834	0.00468147	0.584077	not_sig
HDL	4	17957688	T	A	0.4717	not_sig	-0.0124385	0.00459048	-0.0133541	0.00424802	0.883296	not_sig	-0.011545	0.00529373	-0.0116815	0.00457357	0.984391	not_sig
HDL	4	26047616	A	G	0.7409	not_sig	-0.0196493	0.00447584	-0.027831	0.00414635	0.178717	not_sig	-0.0194006	0.00514772	-0.0270867	0.00446012	0.257818	not_sig
logTG	4	26047616	A	G	0.1965	not_sig	0.01328	0.00437205	0.0322587	0.00400582	0.00132974	not_sig	0.0116836	0.00500688	0.0330594	0.00430258	0.00116675	not_sig
nonHDL	4	26098810	G	A	0.6044	not_sig	0.0128092	0.00369801	0.00972668	0.00337369	0.536906	not_sig	0.0161288	0.00421636	0.0102499	0.00359583	0.287413	not_sig
HDL	4	39698824	G	A	0.1616	not_sig	0.00715995	0.00334652	0.0137335	0.00309291	0.148024	not_sig	0.00728879	0.0038432	0.0136136	0.00332449	0.211999	not_sig
logTG	4	39698824	G	A	0.1168	not_sig	-0.00734373	0.00327214	-0.0100666	0.00298765	0.537749	not_sig	-0.00536132	0.00374162	-0.010956	0.00320684	0.254932	not_sig
HDL	4	45186139	G	A	0.005707	not_sig	-0.00978	0.00338176	-2.88e-05	0.00313	0.0338141	not_sig	-0.0126712	0.00388698	-1.4e-05	0.00337	0.0135817	not_sig
LDL	4	54453676	T	C	0.9523	not_sig	-0.00361574	0.00463158	-0.00728508	0.00420664	0.556478	not_sig	-0.00771523	0.0052746	-0.00868571	0.00448435	0.888216	not_sig
logTG	4	55498781	CG	C	0.1103	not_sig	-0.00743009	0.00326979	-0.0120231	0.00299204	0.298729	not_sig	-0.00834433	0.00374161	-0.0121427	0.00321382	0.439991	not_sig
HDL	4	55530748	ATTATTTAT	A	0.2195	not_sig	0.00827683	0.00341003	0.0136482	0.00315755	0.246467	not_sig	0.0107388	0.00391866	0.0132534	0.00339599	0.626784	not_sig
HDL	4	69339933	A	G	0.5516	not_sig	0.0150729	0.00394927	0.0138421	0.00365479	0.818586	not_sig	0.021995	0.00455009	0.0169022	0.00392846	0.395584	not_sig
LDL	4	69491284	A	T	4.25e-15	sig	0.0461	0.00390792	0.0140454	0.00355116	1.21e-09	sig	0.0459298	0.00446983	0.0131	0.00378897	1.94e-08	sig
nonHDL	4	69491284	A	T	2.87e-18	sig	0.0464	0.00408647	0.0133931	0.00374078	2.21e-09	sig	0.0455648	0.00466117	0.012	0.0039879	4.26e-08	sig
TC	4	69491284	A	T	1.59e-24	sig	0.0518	0.00392103	0.0164198	0.00358295	2.45e-11	sig	0.0536701	0.00446767	0.0159	0.00381211	1.09e-10	sig
logTG	4	69588052	C	T	0.0004091	not_sig	0.0212824	0.0036187	0.00635696	0.00330351	0.00225392	not_sig	0.0193032	0.00414947	0.00534488	0.00354431	0.0103222	not_sig
TC	4	70117093	C	T	0.09228	not_sig	-0.102568	0.022378	-0.0751097	0.0201779	0.360828	not_sig	-0.122733	0.0252829	-0.0697259	0.0212847	0.107776	not_sig
LDL	4	70264840	A	G	0.6245	not_sig	-0.100977	0.0229095	-0.0806053	0.0204969	0.506348	not_sig	-0.119247	0.0259423	-0.0726966	0.0216903	0.167469	not_sig
nonHDL	4	70264840	A	G	0.1525	not_sig	-0.10763	0.0239008	-0.0801896	0.0216062	0.393094	not_sig	-0.128142	0.0269368	-0.0745951	0.0228518	0.128504	not_sig
nonHDL	4	71297926	C	T	0.8632	not_sig	0.0170213	0.0522558	0.0453565	0.049613	0.693338	not_sig	0.00822143	0.0596529	0.0370333	0.0530946	0.717516	not_sig
nonHDL	4	71820941	G	A	0.7774	not_sig	-0.0414178	0.0479416	-0.0851186	0.0419782	0.491649	not_sig	0.0221645	0.0555595	-0.0687224	0.0450226	0.202522	not_sig
LDL	4	72754788	A	C	0.04538	not_sig	-0.255211	0.244019	0.158326	0.257513	0.242443	not_sig	-0.409755	0.293546	0.220372	0.267373	0.111526	not_sig
nonHDL	4	72754788	A	C	0.05586	not_sig	-0.278736	0.260138	0.154867	0.28842	0.262944	not_sig	-0.397759	0.306419	0.205487	0.302181	0.159831	not_sig
TC	4	72754788	A	C	0.01462	not_sig	-0.287516	0.245087	0.183517	0.268166	0.193546	not_sig	-0.368239	0.293732	0.242748	0.278416	0.13006	not_sig
LDL	4	73491622	G	A	0.4236	not_sig	-0.0393511	0.145366	0.117408	0.141633	0.43862	not_sig	-0.0326351	0.178469	0.275904	0.15352	0.188769	not_sig
nonHDL	4	73491622	G	A	0.2063	not_sig	0.0115992	0.152997	0.168429	0.151957	0.465813	not_sig	0.0253108	0.187612	0.341837	0.166653	0.205929	not_sig
TC	4	73491622	G	A	0.1021	not_sig	-0.0315306	0.146002	0.145434	0.143014	0.385237	not_sig	-0.0200206	0.17858	0.301497	0.154588	0.172258	not_sig
LDL	4	74033564	G	C	0.5576	not_sig	0.387148	0.0908313	0.3996	0.0942003	0.923981	not_sig	0.50116	0.108634	0.417844	0.105176	0.580578	not_sig
HDL	4	74512280	G	A	0.2652	not_sig	0.245041	0.0830552	0.287926	0.0836027	0.715169	not_sig	0.304885	0.0995162	0.251647	0.0933345	0.695583	not_sig
logTG	4	74512280	G	A	0.372	not_sig	0.107901	0.080891	0.103456	0.0807302	0.968888	not_sig	0.091349	0.0969876	0.156181	0.0898351	0.622884	not_sig
nonHDL	4	74512280	G	A	0.3909	not_sig	0.397901	0.0843576	0.248504	0.0841399	0.208614	not_sig	0.49637	0.10004	0.233267	0.0930711	0.0534991	not_sig
TC	4	74512280	G	A	0.6651	not_sig	0.473208	0.0807437	0.329618	0.0805103	0.206662	not_sig	0.588664	0.0961321	0.322901	0.0887094	0.0416166	not_sig
LDL	4	74793806	G	A	0.9441	not_sig	0.174006	0.0779052	0.084116	0.0758346	0.40705	not_sig	0.192995	0.0909189	0.080023	0.0812873	0.352954	not_sig
TC	4	75180409	T	C	0.1786	not_sig	-0.0268839	0.0289488	0.0114034	0.0261579	0.325101	not_sig	-0.0326278	0.0328042	0.0227159	0.0277838	0.196731	not_sig
LDL	4	75416194	T	C	0.5249	not_sig	-0.0713081	0.107831	-0.170349	0.105775	0.510852	not_sig	-0.225359	0.125156	-0.103755	0.113985	0.471317	not_sig
nonHDL	4	75684215	C	T	0.7937	not_sig	0.0157487	0.0155531	0.000455689	0.014242	0.467112	not_sig	0.0218644	0.0176322	-0.00999721	0.0151838	0.169738	not_sig
TC	4	75684215	C	T	0.8648	not_sig	0.0116623	0.0149835	-0.00539085	0.0136998	0.399631	not_sig	0.0172545	0.0169372	-0.0177296	0.0145762	0.116442	not_sig
HDL	4	76572191	A	C	0.02702	not_sig	0.00504938	0.00336162	0.0129168	0.00310438	0.0846837	not_sig	0.00891509	0.0038629	0.015572	0.00334011	0.191158	not_sig
TC	4	76650443	C	T	0.2051	not_sig	0.0115879	0.00487592	0.0128338	0.00446334	0.85009	not_sig	0.0156814	0.00553525	0.0125676	0.00474103	0.668345	not_sig
nonHDL	4	76740008	A	G	0.5736	not_sig	-0.010429	0.00494893	-0.0112995	0.00454115	0.896594	not_sig	-0.0125247	0.00562346	-0.0113256	0.00483557	0.871211	not_sig
LDL	4	77420407	A	G	0.5033	not_sig	-0.00871081	0.00340015	-0.00863379	0.00308846	0.986587	not_sig	-0.00979738	0.00387777	-0.00958208	0.00329542	0.966161	not_sig
logTG	4	77421345	C	T	0.1804	not_sig	0.0109984	0.00329076	0.00806109	0.0030074	0.508796	not_sig	0.0120562	0.00376454	0.00892524	0.00323209	0.526894	not_sig
TC	4	77439399	A	C	0.2318	not_sig	-0.0164489	0.00594625	-0.0157988	0.00544818	0.935576	not_sig	-0.0209286	0.00675619	-0.0160315	0.00579402	0.581136	not_sig
HDL	4	83907105	G	A	0.7448	not_sig	-0.0163567	0.00382995	-0.00651839	0.00353448	0.0583594	not_sig	-0.018087	0.00439834	-0.00649205	0.00379982	0.0454621	not_sig
logTG	4	87294293	C	A	0.9993	not_sig	0.0165921	0.00339269	0.0130824	0.00309975	0.443763	not_sig	0.0150652	0.00388885	0.0144769	0.00333089	0.908278	not_sig
nonHDL	4	87985166	C	T	0.1311	not_sig	0.0172273	0.00348003	0.0132446	0.00318842	0.397463	not_sig	0.0211054	0.00396388	0.0130644	0.00340136	0.122658	not_sig
TC	4	87996745	G	A	0.03696	not_sig	0.0127889	0.00332543	0.00850513	0.00304157	0.3405	not_sig	0.0162671	0.00378361	0.00932235	0.00323762	0.161982	not_sig
HDL	4	88050554	G	A	0.8698	not_sig	-0.0134422	0.00342767	-0.0138843	0.0031591	0.924222	not_sig	-0.0136364	0.00393833	-0.0130597	0.00339768	0.911479	not_sig
LDL	4	88052219	T	C	0.8357	not_sig	0.0122639	0.00333088	0.00831907	0.0030199	0.378953	not_sig	0.0124917	0.00379763	0.00798313	0.00322029	0.363896	not_sig
logTG	4	88053085	C	T	0.3854	not_sig	0.0238242	0.00335037	0.0229689	0.00305569	0.849978	not_sig	0.0242548	0.00383233	0.0231562	0.00328147	0.827169	not_sig
logTG	4	89724963	C	G	0.04098	not_sig	0.00617342	0.00328173	0.0155926	0.00299516	0.0335164	not_sig	0.0079338	0.00375524	0.0169259	0.00321726	0.0682361	not_sig
HDL	4	89730074	C	T	0.001538	not_sig	-0.0092997	0.00335704	-0.0205303	0.00310004	0.0137182	not_sig	-0.0105786	0.00385854	-0.0207395	0.00333553	0.045752	not_sig
LDL	4	99713350	C	T	0.07204	not_sig	-0.0880219	0.017357	-0.0615704	0.0160188	0.261428	not_sig	-0.0918402	0.01943	-0.0563769	0.017051	0.168937	not_sig
TC	4	99713350	C	T	0.2534	not_sig	-0.0658261	0.0174156	-0.0520571	0.0161672	0.561216	not_sig	-0.0755582	0.0194182	-0.0484361	0.0171604	0.293949	not_sig
HDL	4	99788480	C	T	0.9356	not_sig	0.0149023	0.00353904	0.0105539	0.00326739	0.365316	not_sig	0.0175565	0.00407184	0.0123089	0.00351043	0.327691	not_sig
logTG	4	100045616	C	T	0.00438	not_sig	0.0192588	0.00356172	0.00670822	0.00325528	0.00910097	not_sig	0.0176512	0.00407717	0.00636794	0.00349465	0.03512	not_sig
nonHDL	4	100239319	T	C	1.36e-05	sig	0.0811	0.0113519	0.0349663	0.0105847	0.00286498	not_sig	0.0812717	0.01271	0.0369745	0.0112647	0.00891057	not_sig
HDL	4	100465173	G	A	0.8604	not_sig	0.0198282	0.00859664	0.0261214	0.00797911	0.590552	not_sig	0.0180997	0.00987197	0.0272211	0.00860533	0.484914	not_sig
LDL	4	100488580	G	C	0.07025	not_sig	-0.0187266	0.00373215	-0.00816525	0.00339738	0.0358674	not_sig	-0.0227453	0.00424948	-0.00786431	0.00361789	0.00750172	not_sig
TC	4	100495817	T	C	0.231	not_sig	-0.0187014	0.00374402	-0.00766431	0.00342803	0.0292394	not_sig	-0.0231006	0.0042472	-0.00866438	0.00364044	0.00965881	not_sig
HDL	4	103188709	C	T	0.0008089	not_sig	-0.0803232	0.00634328	-0.0648425	0.00592368	0.0736751	not_sig	-0.0825459	0.00727377	-0.0679355	0.00636062	0.129462	not_sig
LDL	4	103188709	C	T	0.2439	not_sig	-0.0296835	0.00615645	-0.0217858	0.00566397	0.343794	not_sig	-0.0325513	0.00700468	-0.0201616	0.00603101	0.178921	not_sig
logTG	4	103188709	C	T	0.995	not_sig	0.0224954	0.00619192	0.0292495	0.00572901	0.422043	not_sig	0.0225623	0.00706693	0.0289831	0.00614336	0.491715	not_sig
TC	4	103188709	C	T	0.2373	not_sig	-0.0453255	0.00617709	-0.038492	0.00571311	0.415416	not_sig	-0.0483336	0.00700071	-0.0379084	0.00606659	0.259109	not_sig
HDL	4	103766720	G	A	0.2072	not_sig	-0.0413453	0.00901309	-0.0207036	0.00834094	0.091885	not_sig	-0.057683	0.0103423	-0.0152454	0.00898108	0.00189172	not_sig
logTG	4	103861380	A	G	0.00437	not_sig	-0.00778775	0.003267	-0.00662688	0.00298987	0.792662	not_sig	-0.00792464	0.00373848	-0.00593556	0.00321082	0.685673	not_sig
LDL	4	106064683	G	A	0.0826	not_sig	0.00484751	0.00405504	0.00974107	0.00367097	0.369656	not_sig	0.00272918	0.00462929	0.0093693	0.00391646	0.27218	not_sig
HDL	4	106081636	T	C	0.01834	not_sig	-0.00752612	0.00346848	-0.0130374	0.00319692	0.241356	not_sig	-0.00931001	0.00399226	-0.012934	0.00343844	0.490379	not_sig
HDL	4	110095620	T	C	0.3404	not_sig	-0.097019	0.0202771	-0.117042	0.0184756	0.4642	not_sig	-0.0987591	0.0235329	-0.11767	0.0199524	0.538802	not_sig
logTG	4	110095620	T	C	0.3755	not_sig	0.100308	0.0198693	0.110334	0.0178837	0.706871	not_sig	0.112814	0.0229494	0.125258	0.0192684	0.677108	not_sig
nonHDL	4	110095620	T	C	0.01609	not_sig	0.0546511	0.0205951	0.0810638	0.0185943	0.33981	not_sig	0.0739967	0.0236569	0.0924068	0.0198961	0.550366	not_sig
HDL	4	110638824	C	T	0.3542	not_sig	-0.108949	0.0192179	-0.130961	0.0174911	0.395642	not_sig	-0.113751	0.0223216	-0.132527	0.0188707	0.519485	not_sig
logTG	4	110638824	C	T	0.5084	not_sig	0.118933	0.0187757	0.112273	0.01699	0.791994	not_sig	0.133775	0.0217068	0.127415	0.0182958	0.822251	not_sig
nonHDL	4	110638824	C	T	0.03503	not_sig	0.0637178	0.0195193	0.0834988	0.0176035	0.450459	not_sig	0.0798537	0.0224392	0.0920317	0.0188174	0.676691	not_sig
LDL	4	110942277	G	C	0.8436	not_sig	-0.0104605	0.00349923	-0.00673188	0.00317886	0.429008	not_sig	-0.010923	0.00399206	-0.00513872	0.00338995	0.268083	not_sig
TC	4	120114100	C	G	0.3811	not_sig	-0.0114572	0.0049227	-0.0175984	0.00449835	0.355748	not_sig	-0.0146407	0.00558588	-0.019428	0.00477811	0.51372	not_sig
LDL	4	120128060	A	C	0.639	not_sig	-0.0118006	0.00490403	-0.0139979	0.00445692	0.739511	not_sig	-0.0153427	0.00558567	-0.0165268	0.00474721	0.871332	not_sig
logTG	4	124641827	A	G	0.3869	not_sig	0.0334492	0.0148688	0.0441692	0.0140115	0.598774	not_sig	0.0420776	0.0171975	0.0471914	0.0150764	0.822589	not_sig
LDL	4	128662796	C	T	0.3722	not_sig	0.00540082	0.00337983	0.0037367	0.00306973	0.714749	not_sig	0.0060295	0.00385857	0.00371882	0.00327237	0.646976	not_sig
TC	4	128999619	C	T	0.4121	not_sig	0.00692048	0.00337121	0.00456237	0.00307638	0.604376	not_sig	0.00756861	0.00383489	0.00546918	0.00326996	0.676152	not_sig
logTG	4	141801478	T	C	0.2095	not_sig	-0.0100477	0.00333495	-0.00554202	0.00305125	0.317532	not_sig	-0.0121735	0.00381396	-0.00377863	0.00327783	0.0941525	not_sig
HDL	4	143319721	C	T	0.987	not_sig	0.0092994	0.00343317	0.00420077	0.00317194	0.274027	not_sig	0.0103953	0.00394446	0.00398216	0.00340975	0.21743	not_sig
logTG	4	143326714	T	G	0.7009	not_sig	-0.0090449	0.0033677	-0.00457473	0.00307541	0.325668	not_sig	-0.0112848	0.00385282	-0.00472873	0.00330167	0.195098	not_sig
logTG	4	148985862	T	C	0.08548	not_sig	0.00924441	0.00381349	0.0038439	0.00348432	0.294465	not_sig	0.00787657	0.00437071	0.00370863	0.00374482	0.46775	not_sig
HDL	4	151199080	G	A	0.05203	not_sig	-0.00818659	0.00368272	-0.00629812	0.00341288	0.706055	not_sig	-0.010435	0.00422332	-0.00643605	0.00366991	0.473559	not_sig
TC	4	151199080	G	A	0.0605	not_sig	-0.00601729	0.0035946	-0.0104727	0.00328618	0.358966	not_sig	-0.00816222	0.00407562	-0.00988621	0.0034936	0.747422	not_sig
LDL	4	151206057	G	T	0.7222	not_sig	0.00492689	0.00336823	0.00847713	0.00305752	0.433859	not_sig	0.00509816	0.00383941	0.00872203	0.00326068	0.470663	not_sig
LDL	4	154191226	G	A	0.1966	not_sig	-0.0189329	0.00437526	-0.015607	0.00395626	0.571804	not_sig	-0.0169304	0.00498211	-0.0138437	0.004218	0.635397	not_sig
nonHDL	4	154191226	G	A	0.02021	not_sig	-0.0204088	0.00457167	-0.0135569	0.00417031	0.266849	not_sig	-0.0193582	0.00519129	-0.011614	0.00444384	0.255797	not_sig
TC	4	154191226	G	A	0.04894	not_sig	-0.0217545	0.00438957	-0.0174533	0.00399174	0.467253	not_sig	-0.0215137	0.00497951	-0.0156733	0.00424403	0.37073	not_sig
HDL	4	154208278	C	T	0.7793	not_sig	-0.0115528	0.00476636	-0.0086214	0.00438806	0.650027	not_sig	-0.0103541	0.00547091	-0.00963698	0.00471706	0.920705	not_sig
LDL	4	155489608	C	T	0.0002219	not_sig	0.111239	0.0222399	0.144306	0.0197951	0.26541	not_sig	0.104907	0.0257473	0.157588	0.021385	0.1145	not_sig
logTG	4	155489608	C	T	0.03801	not_sig	0.0774528	0.0223733	0.108453	0.0200464	0.300766	not_sig	0.0722158	0.0259945	0.109319	0.0218117	0.272905	not_sig
nonHDL	4	155489608	C	T	0.004635	not_sig	0.115018	0.0232475	0.152208	0.0209197	0.233093	not_sig	0.115839	0.0268803	0.165999	0.022556	0.151751	not_sig
TC	4	155489608	C	T	0.00089	not_sig	0.118625	0.0223209	0.149013	0.0199841	0.309097	not_sig	0.123958	0.0257474	0.165992	0.0215337	0.209208	not_sig
HDL	4	157682598	T	C	0.1752	not_sig	0.0101798	0.00401925	0.0100052	0.00370315	0.974435	not_sig	0.0135196	0.00461362	0.00825488	0.00397934	0.386227	not_sig
logTG	4	157697086	A	G	0.001828	not_sig	-0.012263	0.00351406	-0.00818017	0.0032136	0.389914	not_sig	-0.0120082	0.00401898	-0.00732377	0.00344893	0.375099	not_sig
LDL	4	185251995	A	T	0.3662	not_sig	0.00558016	0.00333126	0.00283731	0.00302187	0.540851	not_sig	0.00730847	0.00380313	0.00421855	0.00322193	0.534196	not_sig
TC	4	185251995	A	T	0.4815	not_sig	0.00448111	0.00334221	0.00379129	0.00304882	0.878472	not_sig	0.0079578	0.0038012	0.0060081	0.00324173	0.695546	not_sig
HDL	5	665148	A	G	0.7175	not_sig	0.00966206	0.00417886	0.00386248	0.00385774	0.306509	not_sig	0.0100843	0.00479952	0.00197387	0.00414802	0.199829	not_sig
HDL	5	1284135	C	T	0.6776	not_sig	-0.0100478	0.00357639	-0.0107605	0.00331057	0.883412	not_sig	-0.0107171	0.004114	-0.0124775	0.00355583	0.74546	not_sig
HDL	5	39451982	C	T	0.005763	not_sig	0.0103802	0.00874507	0.0109316	0.00808675	0.96298	not_sig	0.00718703	0.0100532	0.0128533	0.0087076	0.669227	not_sig
TC	5	39549119	G	A	0.2685	not_sig	0.00782303	0.00342476	0.00946015	0.00312597	0.723307	not_sig	0.00709417	0.00389374	0.0124024	0.003321	0.2983	not_sig
nonHDL	5	52088271	G	A	0.8453	not_sig	-0.041685	0.00854676	-0.0377215	0.00786699	0.73224	not_sig	-0.0475616	0.0096817	-0.0374748	0.00836266	0.429171	not_sig
LDL	5	52095024	C	T	0.2028	not_sig	-0.0531131	0.00818372	-0.0416387	0.00746057	0.298791	not_sig	-0.0592314	0.0092896	-0.0416214	0.00793669	0.148392	not_sig
TC	5	52095024	C	T	0.5354	not_sig	-0.0405966	0.0082132	-0.0346587	0.00752495	0.592972	not_sig	-0.047007	0.00928791	-0.0338441	0.00798354	0.281171	not_sig
HDL	5	52697383	G	A	0.2301	not_sig	-0.00946166	0.00335699	-0.00599016	0.00310049	0.446192	not_sig	-0.012724	0.00385426	-0.00448754	0.00333321	0.105057	not_sig
HDL	5	53276301	G	A	7.36e-06	sig	-0.0167	0.00362541	-0.00425513	0.00335956	0.0117414	not_sig	-0.0169252	0.00416221	-0.00483	0.00361144	0.0277	not_sig
nonHDL	5	53298716	G	T	0.1942	not_sig	0.0192268	0.00536912	0.0144463	0.00491907	0.510326	not_sig	0.0253563	0.0061202	0.0127353	0.00524847	0.116485	not_sig
TC	5	53298716	G	T	0.8849	not_sig	0.0110725	0.00515279	0.00872856	0.00471352	0.736444	not_sig	0.0183034	0.0058691	0.00727967	0.00501755	0.152265	not_sig
logTG	5	53303452	G	C	0.07254	not_sig	0.0153875	0.00375836	0.0118209	0.00343363	0.48233	not_sig	0.0161374	0.00430594	0.0125685	0.00369133	0.528056	not_sig
HDL	5	55808475	C	T	0.6656	not_sig	-0.0247916	0.00383825	-0.0205592	0.00354798	0.416801	not_sig	-0.0256323	0.00440448	-0.0194495	0.0038105	0.287093	not_sig
LDL	5	55861359	G	A	0.05979	not_sig	0.0112704	0.00400648	0.0264955	0.00365128	0.00485538	not_sig	0.0128428	0.00457731	0.0270272	0.00390176	0.0180399	not_sig
logTG	5	55861359	G	A	0.1411	not_sig	0.0291076	0.00402917	0.0394423	0.00369421	0.0579829	not_sig	0.0290446	0.00461833	0.038273	0.00397546	0.128871	not_sig
nonHDL	5	55861359	G	A	0.1989	not_sig	0.0160673	0.0041855	0.0285173	0.00384815	0.0281079	not_sig	0.0185921	0.00476882	0.0296179	0.00410862	0.0790133	not_sig
TC	5	55861359	G	A	0.3403	not_sig	0.00716217	0.00402039	0.0194783	0.00368386	0.0235191	not_sig	0.0092565	0.00457587	0.021496	0.00392552	0.041781	not_sig
nonHDL	5	57578037	A	G	0.2174	not_sig	-0.00574635	0.00367373	-0.0081625	0.00336098	0.626547	not_sig	-0.00442457	0.00418984	-0.0106575	0.00358117	0.256812	not_sig
TC	5	57578037	A	G	0.2983	not_sig	-0.00342149	0.00352357	-0.00530948	0.00321598	0.691474	not_sig	-0.00257905	0.00401205	-0.0080564	0.00341976	0.297479	not_sig
logTG	5	57607142	A	T	0.1236	not_sig	-0.0102975	0.00334682	-0.00989761	0.00305152	0.929448	not_sig	-0.0130318	0.00383556	-0.010942	0.00327853	0.67793	not_sig
HDL	5	67714246	A	G	0.1026	not_sig	-0.0101846	0.00345311	-0.0118634	0.00319106	0.720305	not_sig	-0.0115606	0.00396719	-0.00901249	0.0034307	0.626136	not_sig
logTG	5	67714246	A	G	0.003567	not_sig	0.0127844	0.00337465	0.0186786	0.00308451	0.196084	not_sig	0.0127837	0.00386079	0.0163232	0.00331155	0.485312	not_sig
TC	5	72013573	T	G	0.2699	not_sig	-0.0150491	0.00400591	-0.0174547	0.00365266	0.656343	not_sig	-0.0141473	0.00455451	-0.0195043	0.00388403	0.369501	not_sig
LDL	5	72159179	C	T	0.1338	not_sig	0.00984649	0.00359937	0.0178682	0.00326253	0.0977553	not_sig	0.00867747	0.00410682	0.0192828	0.00348008	0.048206	not_sig
nonHDL	5	72159179	C	T	0.09984	not_sig	0.0104053	0.00376082	0.019138	0.00343589	0.0856047	not_sig	0.00924158	0.00427993	0.0210768	0.00366236	0.0351328	not_sig
HDL	5	72919127	G	C	0.2585	not_sig	0.00840718	0.00372494	0.00764093	0.00344502	0.87963	not_sig	0.0106526	0.00428752	0.00776356	0.00370491	0.609171	not_sig
LDL	5	74656539	T	C	0.02851	not_sig	0.0563846	0.0033136	0.0559475	0.00301352	0.922051	not_sig	0.0588774	0.00379226	0.0597917	0.0032141	0.85368	not_sig
nonHDL	5	74656539	T	C	0.02351	not_sig	0.0530321	0.003464	0.0542241	0.00317583	0.799228	not_sig	0.0548761	0.00395302	0.0580087	0.0033854	0.546138	not_sig
TC	5	74656539	T	C	0.004962	not_sig	0.0531506	0.00332445	0.0553958	0.00304046	0.617255	not_sig	0.0573089	0.00379056	0.0591	0.00323389	0.719	not_sig
HDL	5	75003678	T	C	0.7488	not_sig	0.014171	0.00342785	0.0161335	0.00316741	0.67329	not_sig	0.0172006	0.00394412	0.0165401	0.00340647	0.898873	not_sig
HDL	5	75700310	C	T	0.4317	not_sig	0.00857287	0.00352871	0.00665092	0.00326216	0.688382	not_sig	0.00944415	0.00405425	0.00690185	0.00350911	0.634473	not_sig
logTG	5	78472599	G	T	0.5086	not_sig	-0.0122847	0.00337219	-0.0124616	0.00308227	0.969014	not_sig	-0.0124233	0.00385958	-0.0129616	0.00330777	0.915432	not_sig
HDL	5	78543716	T	G	0.4432	not_sig	0.00871777	0.00344992	0.00853108	0.00319045	0.96822	not_sig	0.00769592	0.00396866	0.0107634	0.0034296	0.557595	not_sig
HDL	5	82815158	A	G	0.02098	not_sig	0.0311446	0.00842948	0.0271709	0.00776605	0.728098	not_sig	0.0264828	0.00965664	0.031365	0.00833869	0.701197	not_sig
logTG	5	82815158	A	G	0.1112	not_sig	-0.0248881	0.00824186	-0.0312889	0.00752323	0.565174	not_sig	-0.0281792	0.00939854	-0.0352593	0.0080608	0.566379	not_sig
logTG	5	90255685	A	G	0.2394	not_sig	0.0100248	0.00369441	0.0111808	0.00337208	0.816726	not_sig	0.00737058	0.00422499	0.0102657	0.00361678	0.601683	not_sig
HDL	5	96105926	G	A	0.5377	not_sig	0.00564981	0.00335642	0.00627072	0.00310843	0.89174	not_sig	0.00768474	0.00385798	0.00614212	0.00334223	0.761854	not_sig
logTG	5	107316915	G	A	0.9795	not_sig	-0.00763279	0.00353201	-0.00918128	0.00322342	0.745387	not_sig	-0.00650305	0.00404045	-0.00928258	0.00345886	0.600258	not_sig
logTG	5	112304202	T	G	0.6078	not_sig	0.00606715	0.00326554	0.0052168	0.00298649	0.847201	not_sig	0.00533003	0.00373592	0.00488852	0.00320652	0.928348	not_sig
HDL	5	112379659	T	C	0.5016	not_sig	-0.00697388	0.00335696	-0.0059559	0.00310456	0.823341	not_sig	-0.00549232	0.0038608	-0.00532494	0.00333904	0.97377	not_sig
HDL	5	118729327	A	G	3.41e-10	sig	0.00906	0.00378185	0.0227287	0.00348929	0.00772696	not_sig	0.00855496	0.00434191	0.0194	0.00374762	0.0569	not_sig
logTG	5	118729327	A	G	3.22e-10	sig	-0.0115	0.00369861	-0.0247486	0.00337346	0.00781342	not_sig	-0.012553	0.00422861	-0.0223	0.00361772	0.0802	not_sig
LDL	5	122833667	C	T	0.7658	not_sig	0.014236	0.00326771	0.0146132	0.0029647	0.931684	not_sig	0.0138762	0.00372848	0.0161276	0.00316027	0.644155	not_sig
nonHDL	5	122833667	C	T	0.7125	not_sig	0.0141087	0.00341458	0.0158209	0.00312291	0.710604	not_sig	0.0139704	0.00388559	0.0171258	0.00332573	0.53615	not_sig
TC	5	122833667	C	T	0.6014	not_sig	0.0137367	0.00327829	0.0144991	0.00299104	0.863217	not_sig	0.0137724	0.00372646	0.0153537	0.00317938	0.746161	not_sig
HDL	5	127357526	C	T	0.8431	not_sig	0.014904	0.00388562	0.0135015	0.00359589	0.790506	not_sig	0.0186233	0.00446375	0.0104722	0.00386269	0.166164	not_sig
logTG	5	127453735	T	A	0.986	not_sig	0.00690399	0.00380082	0.00612364	0.00347599	0.879246	not_sig	0.00740961	0.0043474	0.00526321	0.00372901	0.707082	not_sig
HDL	5	129196638	T	A	0.4629	not_sig	-0.00914581	0.00352366	-0.00938537	0.00325863	0.960079	not_sig	-0.0094838	0.00404463	-0.00992342	0.0035037	0.934344	not_sig
HDL	5	131008194	T	C	0.3539	not_sig	0.0237554	0.00715843	0.0165346	0.00662413	0.457836	not_sig	0.0299815	0.00821507	0.0153778	0.00713551	0.178371	not_sig
logTG	5	131008194	T	C	0.2212	not_sig	-0.0240644	0.00699875	-0.016826	0.00639155	0.443786	not_sig	-0.0252416	0.00799741	-0.0155344	0.00687469	0.356016	not_sig
nonHDL	5	131781288	A	C	0.01213	not_sig	-0.0112405	0.00436428	-0.0197912	0.00399104	0.147105	not_sig	-0.0124396	0.00496091	-0.0221416	0.00425172	0.136483	not_sig
TC	5	131797547	A	G	0.2791	not_sig	0.0129141	0.00334741	0.00898405	0.00306501	0.385224	not_sig	0.0134238	0.00380542	0.0103399	0.00325837	0.537062	not_sig
LDL	5	131807624	G	A	0.1983	not_sig	-0.0131793	0.00419202	-0.0219133	0.0038018	0.121722	not_sig	-0.0136973	0.00477646	-0.0248711	0.00405277	0.0736689	not_sig
HDL	5	132444128	G	A	0.8365	not_sig	0.0201319	0.00574555	0.0146185	0.00532108	0.480188	not_sig	0.0201755	0.00658916	0.0159008	0.00570658	0.622893	not_sig
logTG	5	132444128	G	A	0.05809	not_sig	-0.0201116	0.00562191	-0.0286484	0.00513854	0.261034	not_sig	-0.0237482	0.00641974	-0.0296069	0.00550361	0.487209	not_sig
logTG	5	134136333	C	T	0.5182	not_sig	0.00391006	0.00534085	0.00467331	0.00487439	0.915703	not_sig	0.00334709	0.00610528	0.0051488	0.00523689	0.822283	not_sig
HDL	5	134444982	C	A	0.03652	not_sig	-0.0137103	0.00340091	-0.00818947	0.00315423	0.232663	not_sig	-0.00943973	0.00391431	-0.00815956	0.00339185	0.804254	not_sig
LDL	5	139527721	G	A	0.8338	not_sig	-0.013308	0.0043259	-0.0134133	0.00392947	0.985593	not_sig	-0.0125779	0.00492585	-0.0133791	0.00418556	0.901087	not_sig
TC	5	139651321	T	C	0.9546	not_sig	-0.0119958	0.00399936	-0.0149574	0.00366013	0.583828	not_sig	-0.0103751	0.00453705	-0.0162138	0.00388824	0.327166	not_sig
nonHDL	5	139664820	T	C	0.587	not_sig	-0.0119318	0.00418955	-0.0129931	0.0038454	0.85155	not_sig	-0.00866622	0.00475754	-0.0140408	0.00409537	0.390603	not_sig
logTG	5	140063891	AAAAC	A	0.6382	not_sig	-0.0150071	0.00391949	-0.0156211	0.00358359	0.907699	not_sig	-0.0176795	0.0044848	-0.0167856	0.00384928	0.879453	not_sig
HDL	5	141542219	G	GA	0.1079	not_sig	0.011912	0.0037062	0.00537085	0.0034211	0.193441	not_sig	0.00980285	0.0042614	0.00478536	0.00367825	0.371445	not_sig
logTG	5	141707225	A	G	0.1384	not_sig	-0.00334708	0.00355636	-0.0116592	0.00325226	0.0837074	not_sig	-0.000941157	0.00406575	-0.0112807	0.00349416	0.0531149	not_sig
LDL	5	141888881	C	T	0.08875	not_sig	0.0135428	0.00523722	0.0190965	0.0047869	0.432507	not_sig	0.0151128	0.00599252	0.0174912	0.00510695	0.761965	not_sig
TC	5	141888881	C	T	0.3801	not_sig	0.00943869	0.00525459	0.0181054	0.00483002	0.223353	not_sig	0.0123918	0.0059894	0.0177923	0.00513871	0.492583	not_sig
nonHDL	5	141911176	G	A	0.1097	not_sig	0.0104447	0.00533559	0.0200217	0.00492237	0.185864	not_sig	0.0105956	0.00608822	0.0204782	0.00524878	0.217648	not_sig
HDL	5	148844793	G	T	0.08871	not_sig	-0.00636269	0.00388502	-0.0084695	0.00359327	0.689733	not_sig	-0.00828304	0.00446731	-0.00993894	0.00386321	0.778598	not_sig
logTG	5	149353598	A	G	0.5805	not_sig	-0.0110595	0.00331724	-0.00982262	0.00303233	0.782562	not_sig	-0.0131164	0.00379297	-0.00887203	0.00325393	0.394418	not_sig
nonHDL	5	149443298	C	T	0.1045	not_sig	0.00801022	0.00381166	0.0135379	0.00348836	0.283372	not_sig	0.0102416	0.00432953	0.0122991	0.00371531	0.71763	not_sig
HDL	5	153444950	A	G	0.6163	not_sig	-0.0118449	0.00345535	-0.00911525	0.00320228	0.561229	not_sig	-0.0117274	0.00397156	-0.00860346	0.00344212	0.551145	not_sig
nonHDL	5	155581796	A	G	0.04773	not_sig	-0.104571	0.109255	0.193637	0.0982301	0.0418181	not_sig	-0.184381	0.125929	0.201054	0.106229	0.01898	not_sig
LDL	5	156391628	T	C	0.06612	not_sig	0.0360801	0.00337347	0.0339519	0.00306534	0.639641	not_sig	0.0396477	0.00384088	0.0379634	0.00326722	0.73767	not_sig
logTG	5	156391628	T	C	0.2038	not_sig	0.0306489	0.0033927	0.0253892	0.00310134	0.251203	not_sig	0.0333275	0.00387554	0.0270642	0.003329	0.218962	not_sig
nonHDL	5	156391628	T	C	0.9252	not_sig	0.0404837	0.00352523	0.0369036	0.00322825	0.452623	not_sig	0.0455239	0.00400236	0.0405219	0.00343784	0.341783	not_sig
TC	5	156391628	T	C	0.2518	not_sig	0.0399154	0.00338458	0.03738	0.00309268	0.579214	not_sig	0.0446501	0.00383915	0.0418802	0.00328721	0.582629	not_sig
logTG	5	158011435	G	C	0.0483	not_sig	0.0158233	0.00388457	0.0193828	0.00355307	0.497755	not_sig	0.0174059	0.00445377	0.0200612	0.00381371	0.64976	not_sig
HDL	5	158020425	A	G	0.911	not_sig	-0.0185613	0.00399297	-0.0151834	0.0036985	0.533704	not_sig	-0.0206481	0.00459841	-0.0138843	0.00397572	0.264525	not_sig
HDL	5	158622532	C	A	0.7273	not_sig	0.00831875	0.00389125	0.0120097	0.00360245	0.485193	not_sig	0.00715774	0.00447208	0.0126788	0.00387243	0.349341	not_sig
HDL	5	170612546	G	A	0.2899	not_sig	-0.0127837	0.0035979	-0.0065733	0.0033434	0.204812	not_sig	-0.0122519	0.00413575	-0.00662058	0.00359372	0.30271	not_sig
HDL	5	172591337	T	G	0.3941	not_sig	0.0071512	0.0049462	0.00511025	0.00455584	0.760865	not_sig	0.00625606	0.00568576	0.00578013	0.00490296	0.949316	not_sig
HDL	5	173356752	G	C	0.0009433	not_sig	-0.0128908	0.00364912	-0.00261362	0.00336875	0.0379775	not_sig	-0.0171294	0.0041952	-0.00352195	0.00361953	0.0137929	not_sig
logTG	5	173356752	G	C	0.006525	not_sig	0.0165626	0.00356609	0.00385792	0.00325579	0.00833183	not_sig	0.0190147	0.00408171	0.00417724	0.00349341	0.00561768	not_sig
LDL	5	176522036	C	T	0.9133	not_sig	-0.00644293	0.00358415	-0.00929402	0.003255	0.554854	not_sig	-0.00508171	0.00408781	-0.00980711	0.00347118	0.376929	not_sig
HDL	5	176551103	C	A	0.84	not_sig	0.0127923	0.00482447	0.0118902	0.00445511	0.890439	not_sig	0.0127091	0.00553266	0.0141199	0.00478804	0.846688	not_sig
logTG	5	176629546	G	A	0.08797	not_sig	-0.00870968	0.00389726	-0.0127299	0.00355553	0.444769	not_sig	-0.00865008	0.00446044	-0.0124219	0.00382173	0.519629	not_sig
TC	5	180308441	T	C	0.9856	not_sig	-0.0338779	0.0159241	-0.0452791	0.014403	0.594407	not_sig	-0.0399068	0.0180173	-0.0490712	0.0153229	0.697621	not_sig
HDL	5	180349778	C	T	0.07989	not_sig	-0.0600842	0.0167632	-0.0489118	0.0153826	0.62242	not_sig	-0.0651428	0.0191363	-0.0466675	0.0165489	0.464001	not_sig
logTG	6	7247344	C	A	0.8634	not_sig	-0.012232	0.00420191	-0.0102724	0.00383571	0.729809	not_sig	-0.0111563	0.00480017	-0.0103161	0.00410959	0.893934	not_sig
LDL	6	11842824	G	A	0.5734	not_sig	-0.0265021	0.00627036	-0.024989	0.00569017	0.857782	not_sig	-0.0218969	0.00713033	-0.025828	0.00605473	0.673461	not_sig
nonHDL	6	11865597	T	C	0.0885	not_sig	-0.0249398	0.00624959	-0.0242066	0.00572272	0.930858	not_sig	-0.0205764	0.00708554	-0.0235768	0.00609103	0.747455	not_sig
TC	6	11868682	T	C	0.251	not_sig	-0.00878729	0.00373149	-0.0140329	0.00341426	0.298331	not_sig	-0.00666801	0.00424241	-0.0136738	0.00363339	0.208504	not_sig
LDL	6	16126934	G	A	0.2723	not_sig	-0.0256422	0.00354363	-0.0280781	0.00322225	0.610068	not_sig	-0.0298299	0.00403806	-0.0305654	0.00343212	0.889312	not_sig
nonHDL	6	16131156	T	C	0.3053	not_sig	-0.0248262	0.00370309	-0.0262761	0.00339465	0.772256	not_sig	-0.0289018	0.00420964	-0.0289386	0.00361314	0.994686	not_sig
TC	6	16131156	T	C	0.3551	not_sig	-0.0223711	0.00355609	-0.0261019	0.00325189	0.437535	not_sig	-0.0266807	0.00403698	-0.028771	0.00345421	0.693204	not_sig
HDL	6	16810627	G	T	0.9765	not_sig	0.0103749	0.00368739	0.0100001	0.00341399	0.940376	not_sig	0.00954614	0.00423743	0.00926914	0.00367138	0.960487	not_sig
logTG	6	18747705	G	T	0.934	not_sig	-0.00764191	0.00332929	-0.00831906	0.00304167	0.880311	not_sig	-0.00606892	0.00380702	-0.00895609	0.00326767	0.563905	not_sig
nonHDL	6	18747705	G	T	0.8065	not_sig	-0.0102351	0.00345746	-0.00824981	0.00316626	0.671094	not_sig	-0.00966558	0.00393062	-0.00931684	0.00337491	0.946184	not_sig
TC	6	18747705	G	T	0.1187	not_sig	-0.00857302	0.00332134	-0.00663945	0.00303327	0.666423	not_sig	-0.00727446	0.00377105	-0.00744812	0.00322673	0.972011	not_sig
LDL	6	18757805	T	C	0.9651	not_sig	-0.00936113	0.00340542	-0.00779156	0.00308872	0.732095	not_sig	-0.00844066	0.00388348	-0.00832237	0.00329603	0.981422	not_sig
LDL	6	20413721	A	G	0.2064	not_sig	0.0123222	0.00345503	0.00644918	0.00314427	0.207431	not_sig	0.0109865	0.00393825	0.00786144	0.00335106	0.544509	not_sig
nonHDL	6	20413721	A	G	0.08414	not_sig	0.0128258	0.00360949	0.00799491	0.00331289	0.322785	not_sig	0.0116494	0.00410148	0.00925648	0.00352799	0.657391	not_sig
TC	6	20413721	A	G	0.09373	not_sig	0.0123309	0.00346683	0.0100481	0.00317241	0.626169	not_sig	0.0115797	0.00393674	0.0116991	0.00337165	0.981563	not_sig
logTG	6	20665549	G	A	0.462	not_sig	0.00688178	0.00352245	0.0127762	0.00322534	0.21587	not_sig	0.00636029	0.00403697	0.0128252	0.00346676	0.223124	not_sig
LDL	6	21384613	A	G	0.3493	not_sig	0.00684197	0.00333746	0.00783921	0.00304477	0.824815	not_sig	0.00795966	0.0038067	0.00906474	0.00324261	0.824626	not_sig
TC	6	21385702	T	C	0.3527	not_sig	0.00590452	0.00337281	0.00764827	0.00309239	0.702366	not_sig	0.00619159	0.00383312	0.00949886	0.00328461	0.511198	not_sig
nonHDL	6	21391282	T	C	0.806	not_sig	-0.00700956	0.00363026	-0.00887579	0.00333583	0.704256	not_sig	-0.00719625	0.00412987	-0.00921549	0.00355165	0.710098	not_sig
LDL	6	22343592	G	A	0.6367	not_sig	-0.0143032	0.00639337	-0.0165427	0.00580332	0.794798	not_sig	-0.0147134	0.00728868	-0.0164324	0.00618644	0.856913	not_sig
TC	6	22343592	G	A	0.3878	not_sig	-0.0173869	0.00641506	-0.0174557	0.00585533	0.993658	not_sig	-0.0192642	0.0072858	-0.0171458	0.00622443	0.824569	not_sig
LDL	6	25314597	A	G	0.7847	not_sig	-0.0172317	0.00628575	-0.0201514	0.00567046	0.729456	not_sig	-0.0200293	0.00714778	-0.0244388	0.0060452	0.636698	not_sig
nonHDL	6	25314597	A	G	0.8324	not_sig	-0.0143519	0.00656744	-0.0177314	0.00597424	0.702684	not_sig	-0.0190086	0.00743716	-0.0214952	0.00636178	0.7989	not_sig
TC	6	25314597	A	G	0.606	not_sig	-0.0149117	0.00630771	-0.0213467	0.00572201	0.448631	not_sig	-0.0178893	0.00714588	-0.0229667	0.00608285	0.587447	not_sig
LDL	6	25918225	T	C	0.001276	not_sig	-0.0590997	0.00610722	-0.0386887	0.00551468	0.0128693	not_sig	-0.0659838	0.00694643	-0.041976	0.00586467	0.00809559	not_sig
nonHDL	6	25918225	T	C	0.006538	not_sig	-0.0574513	0.0063867	-0.0349584	0.00581287	0.00900739	not_sig	-0.06397	0.00723676	-0.0375328	0.00617464	0.00532477	not_sig
TC	6	25918225	T	C	0.004463	not_sig	-0.0557454	0.00612869	-0.0341332	0.00556526	0.00884792	not_sig	-0.0627525	0.00694468	-0.0355415	0.00590184	0.00275435	not_sig
logTG	6	26167951	C	G	0.04495	not_sig	-0.00953291	0.00338463	-0.00486022	0.00309337	0.306833	not_sig	-0.0108739	0.00387302	-0.00436052	0.00331964	0.200409	not_sig
HDL	6	26200677	A	G	0.8319	not_sig	0.00729738	0.00377317	0.00865226	0.00348257	0.791318	not_sig	0.00543863	0.00433121	0.00738911	0.00374259	0.732591	not_sig
LDL	6	27067657	A	T	0.04816	not_sig	-0.0329042	0.00588688	-0.0161834	0.00533418	0.034804	not_sig	-0.0322949	0.00668697	-0.0153808	0.00567616	0.0531568	not_sig
nonHDL	6	27067657	A	T	0.1937	not_sig	-0.0289391	0.00615873	-0.0139642	0.00561423	0.0715614	not_sig	-0.0285343	0.00697632	-0.0138368	0.00596907	0.108455	not_sig
TC	6	27067657	A	T	0.1363	not_sig	-0.0312256	0.00590747	-0.015469	0.0053816	0.0480189	not_sig	-0.0312749	0.00668516	-0.0146037	0.0057108	0.0572591	not_sig
HDL	6	28052823	A	C	0.3014	not_sig	-0.0127116	0.00464266	-0.00788989	0.00429103	0.444387	not_sig	-0.0112432	0.00534269	-0.00710452	0.00461147	0.556516	not_sig
logTG	6	28394680	C	T	0.8494	not_sig	-0.00887928	0.00508432	-0.00606893	0.00463872	0.682197	not_sig	-0.0119215	0.00581108	-0.0082238	0.0049798	0.628029	not_sig
TC	6	28785085	C	T	0.5378	not_sig	0.0261402	0.00551152	0.0157582	0.00505065	0.163738	not_sig	0.0307366	0.00624646	0.0148598	0.00535918	0.0530699	not_sig
logTG	6	29549653	C	G	0.693	not_sig	-0.010013	0.00486725	-0.00694015	0.00445545	0.640519	not_sig	-0.0122391	0.00555697	-0.00711549	0.00477974	0.483346	not_sig
nonHDL	6	29850784	A	G	0.188	not_sig	0.0221533	0.0043387	0.0172616	0.00398152	0.404849	not_sig	0.0263422	0.00494338	0.017328	0.0042451	0.165381	not_sig
HDL	6	29915061	T	C	0.2984	not_sig	0.0087882	0.00347656	0.0117781	0.00321905	0.526866	not_sig	0.0106681	0.00399359	0.0127971	0.00345766	0.686113	not_sig
LDL	6	29935250	G	A	0.5107	not_sig	0.0148635	0.0032524	0.0110389	0.00295321	0.382666	not_sig	0.0168063	0.0037103	0.010764	0.0031492	0.21314	not_sig
TC	6	30073847	C	T	0.6007	not_sig	0.0143897	0.00326089	0.011199	0.00298439	0.469179	not_sig	0.0133794	0.00370462	0.0111087	0.00317272	0.640629	not_sig
logTG	6	30074072	G	C	0.8417	not_sig	-0.0114732	0.00473099	-0.00862661	0.00432839	0.656211	not_sig	-0.012605	0.00540505	-0.00838443	0.00464395	0.552576	not_sig
nonHDL	6	30597083	C	T	0.09957	not_sig	0.0422606	0.00873918	0.0310138	0.00795448	0.3399	not_sig	0.0436947	0.00997177	0.0329374	0.0084955	0.410268	not_sig
HDL	6	30764907	G	A	0.6233	not_sig	-0.0136075	0.00432276	-0.00757183	0.00400684	0.304492	not_sig	-0.0156314	0.00496034	-0.0100625	0.00430074	0.394998	not_sig
logTG	6	30798697	C	T	0.9768	not_sig	-0.012993	0.00459946	-0.00997438	0.00421689	0.627603	not_sig	-0.012263	0.00525221	-0.00991987	0.00452006	0.734554	not_sig
nonHDL	6	31106459	C	A	0.2269	not_sig	0.032227	0.0062907	0.0297415	0.00575245	0.769991	not_sig	0.03443	0.00718528	0.0315236	0.0061418	0.75784	not_sig
TC	6	31263510	T	C	0.1614	not_sig	0.0145227	0.00354297	0.0130978	0.00323683	0.765903	not_sig	0.0172668	0.00401872	0.0142187	0.00343683	0.563251	not_sig
HDL	6	31302029	A	G	0.006657	not_sig	-0.0200736	0.00347795	-0.0133971	0.00322248	0.157935	not_sig	-0.0224289	0.00399899	-0.0158624	0.00346441	0.213314	not_sig
logTG	6	31326289	G	A	0.05043	not_sig	0.0242234	0.00344936	0.0168619	0.00316342	0.114744	not_sig	0.0253908	0.00394982	0.0170458	0.00339998	0.108356	not_sig
logTG	6	31878495	A	G	0.5715	not_sig	0.0172073	0.0035216	0.0138767	0.00321667	0.483777	not_sig	0.0200626	0.0040206	0.0156997	0.00344861	0.408847	not_sig
LDL	6	31885930	C	T	0.3731	not_sig	0.0131613	0.00332302	0.00948974	0.00302077	0.412309	not_sig	0.01384	0.00378268	0.0111909	0.00321843	0.592761	not_sig
nonHDL	6	31885930	C	T	0.7177	not_sig	0.0149118	0.0034722	0.0118957	0.00318176	0.520745	not_sig	0.0164784	0.00394185	0.0134256	0.00338786	0.555894	not_sig
TC	6	31885930	C	T	0.7202	not_sig	0.0135497	0.00333396	0.0125679	0.00304802	0.827484	not_sig	0.0150017	0.00378066	0.0142492	0.00323836	0.879511	not_sig
logTG	6	32441696	C	T	0.271	not_sig	0.0630359	0.00853943	0.048249	0.00778086	0.199316	not_sig	0.0637405	0.00977463	0.0526418	0.00838265	0.387432	not_sig
TC	6	32590735	C	T	0.5391	not_sig	0.0266179	0.00412406	0.0275358	0.00375902	0.868981	not_sig	0.0281462	0.00469763	0.0285543	0.00400339	0.947141	not_sig
HDL	6	32596370	C	T	0.5152	not_sig	-0.0308561	0.00875627	-0.0344988	0.00808388	0.759215	not_sig	-0.0281382	0.0100759	-0.0378572	0.00872158	0.464586	not_sig
nonHDL	6	32627700	A	G	0.2459	not_sig	0.029884	0.00435009	0.0313626	0.00397661	0.801386	not_sig	0.031096	0.00496146	0.0326738	0.00424265	0.808509	not_sig
LDL	6	32657201	T	A	0.2312	not_sig	0.0310048	0.00501251	0.0370767	0.00452264	0.36713	not_sig	0.0314	0.00573206	0.0377893	0.00482987	0.39269	not_sig
HDL	6	34141700	C	A	0.4746	not_sig	-0.0409424	0.00866896	-0.0435173	0.00798664	0.826607	not_sig	-0.0471812	0.00996481	-0.0420552	0.00860514	0.696237	not_sig
logTG	6	34247047	C	T	0.001127	not_sig	0.0261208	0.00792684	0.0433749	0.00722267	0.106659	not_sig	0.035837	0.00908839	0.0398417	0.00776771	0.736962	not_sig
LDL	6	34616322	G	C	0.1497	not_sig	-0.0219403	0.00507535	-0.0189063	0.00463403	0.657992	not_sig	-0.0246632	0.00580062	-0.0232282	0.00494069	0.850217	not_sig
nonHDL	6	34616322	G	C	0.513	not_sig	-0.0206171	0.00530031	-0.0175452	0.00488386	0.669084	not_sig	-0.0218199	0.006043	-0.0206975	0.00520424	0.88777	not_sig
TC	6	34616322	G	C	0.2422	not_sig	-0.0285963	0.00509342	-0.0266617	0.00467471	0.779011	not_sig	-0.029931	0.00579955	-0.0303601	0.00497019	0.955082	not_sig
HDL	6	34658080	A	C	0.00331	not_sig	0.0245004	0.00348337	0.0178957	0.00322938	0.163221	not_sig	0.026303	0.00400377	0.0191199	0.00347219	0.174103	not_sig
logTG	6	35237153	C	T	0.9969	not_sig	0.0261807	0.00921271	0.0164578	0.00848078	0.4362	not_sig	0.0300807	0.0105558	0.0177429	0.00914397	0.375682	not_sig
HDL	6	35476562	T	A	0.588	not_sig	-0.0108445	0.00526558	-0.0025207	0.00490071	0.245896	not_sig	-0.00937962	0.00605811	-0.00252573	0.00526696	0.391916	not_sig
nonHDL	6	35508531	G	A	0.08331	not_sig	-0.00910634	0.00687737	-0.0184542	0.0063192	0.315552	not_sig	-0.00676197	0.00781792	-0.0205934	0.00671772	0.178449	not_sig
HDL	6	36477260	G	A	0.02198	not_sig	-0.00899001	0.0043006	-0.00640205	0.00395971	0.657098	not_sig	-0.00569269	0.00494362	-0.00568387	0.00425515	0.998918	not_sig
logTG	6	36645968	G	C	0.7746	not_sig	-0.0111086	0.00411488	-0.0065675	0.00377029	0.414539	not_sig	-0.00881556	0.00469918	-0.0068635	0.00404458	0.752222	not_sig
nonHDL	6	37029684	A	C	0.1694	not_sig	-0.0091082	0.00341133	-0.0173526	0.00312776	0.0740537	not_sig	-0.0100394	0.00388229	-0.0167528	0.00333256	0.188266	not_sig
LDL	6	37037818	T	TA	0.2355	not_sig	-0.00833267	0.00325929	-0.014466	0.00296224	0.162583	not_sig	-0.00941457	0.00371791	-0.0129804	0.00315875	0.4636	not_sig
TC	6	37038432	A	G	0.1741	not_sig	-0.0095965	0.00326813	-0.0173768	0.00298691	0.0780414	not_sig	-0.0115509	0.00371416	-0.0166117	0.00317611	0.299079	not_sig
LDL	6	39238772	C	T	0.864	not_sig	0.0116341	0.00346555	0.013395	0.00315426	0.706322	not_sig	0.0108824	0.00395418	0.0141991	0.00336595	0.521864	not_sig
TC	6	39238772	C	T	0.5461	not_sig	0.010594	0.00347709	0.0142292	0.00318264	0.439329	not_sig	0.0109976	0.00395252	0.0153633	0.00338689	0.400326	not_sig
nonHDL	6	40962537	T	A	0.8645	not_sig	-0.0111079	0.00672962	-0.0111814	0.00617053	0.993562	not_sig	-0.0121864	0.0076571	-0.00897771	0.00657125	0.749819	not_sig
logTG	6	40998167	T	C	0.4445	not_sig	-0.00613264	0.00519687	-0.0128991	0.00473297	0.334396	not_sig	-0.00630716	0.00595009	-0.0126476	0.00508876	0.416759	not_sig
HDL	6	41986427	C	T	0.7577	not_sig	-0.0184993	0.00390443	-0.0135538	0.00360085	0.350462	not_sig	-0.0202485	0.00448833	-0.0146142	0.00387215	0.340541	not_sig
logTG	6	42839062	A	G	0.8578	not_sig	0.0104407	0.00364924	0.00592692	0.00334705	0.360677	not_sig	0.01298	0.00417463	0.00585289	0.00359558	0.194583	not_sig
nonHDL	6	42934620	C	T	0.8101	not_sig	-0.0105406	0.00340743	-0.00846921	0.00312411	0.653209	not_sig	-0.0128713	0.00387294	-0.010363	0.00332824	0.622338	not_sig
LDL	6	42940673	A	G	0.15	not_sig	-0.012802	0.00329463	-0.00900106	0.00300168	0.392458	not_sig	-0.0155002	0.00375661	-0.0114421	0.00319901	0.409534	not_sig
HDL	6	42940810	T	C	0.9864	not_sig	0.0137644	0.00335659	0.0188684	0.003106	0.263073	not_sig	0.0138492	0.00385503	0.0187321	0.0033399	0.337078	not_sig
LDL	6	43756169	C	T	0.112	not_sig	-0.00375218	0.00538805	-0.0278999	0.00487884	0.000864299	not_sig	-0.0132831	0.0061214	-0.0290412	0.00518986	0.0489609	not_sig
logTG	6	43757896	C	A	0.614	not_sig	0.0327798	0.00327586	0.0349326	0.00299911	0.626931	not_sig	0.0353786	0.00374825	0.0341347	0.00321978	0.800712	not_sig
nonHDL	6	43757896	C	A	0.07145	not_sig	0.0139561	0.0034041	0.022118	0.00312535	0.0765513	not_sig	0.0183975	0.00387181	0.0232892	0.00332974	0.336789	not_sig
TC	6	43757896	C	A	0.05514	not_sig	0.00288086	0.00326795	0.0125505	0.00299084	0.0286094	not_sig	0.00630189	0.00371298	0.0147648	0.00317942	0.0825569	not_sig
HDL	6	43760327	C	G	0.04947	not_sig	-0.0308607	0.00334702	-0.0273562	0.00310006	0.441119	not_sig	-0.0318857	0.00384592	-0.0255852	0.00333397	0.214508	not_sig
LDL	6	52458678	C	G	0.1371	not_sig	0.00794366	0.00338753	0.00683563	0.00308526	0.808397	not_sig	0.00963606	0.00386324	0.0064989	0.00328791	0.535188	not_sig
TC	6	52458678	C	G	0.2482	not_sig	0.00752383	0.00339892	0.00747101	0.00311294	0.99083	not_sig	0.00972324	0.00386157	0.00725666	0.00330811	0.626669	not_sig
HDL	6	52627165	A	G	0.4733	not_sig	0.0072041	0.00350705	0.0110047	0.00323041	0.424117	not_sig	0.010722	0.00403498	0.00740823	0.00347756	0.532758	not_sig
logTG	6	52630269	C	A	0.1839	not_sig	-0.0178292	0.00342731	-0.0194232	0.00311975	0.73018	not_sig	-0.0187311	0.00392601	-0.016939	0.00335243	0.727765	not_sig
nonHDL	6	52643065	G	A	0.8233	not_sig	-0.0134252	0.00343245	-0.00766241	0.00314216	0.214308	not_sig	-0.0115423	0.00390789	-0.005392	0.00335046	0.23088	not_sig
nonHDL	6	53508265	G	T	0.583	not_sig	0.0181448	0.00385169	0.0146053	0.00352269	0.496523	not_sig	0.0220226	0.00438654	0.0153782	0.00375679	0.24865	not_sig
LDL	6	53509035	G	C	0.1906	not_sig	0.0173777	0.00369375	0.0156053	0.00334972	0.721508	not_sig	0.0195461	0.00421807	0.0162413	0.00357556	0.548979	not_sig
TC	6	53509035	G	C	0.6374	not_sig	0.0166466	0.00370611	0.0148293	0.00337983	0.716377	not_sig	0.0204771	0.00421631	0.0158358	0.00359762	0.401081	not_sig
logTG	6	86296925	CA	C	0.4022	not_sig	0.00977714	0.00334383	0.00955577	0.00306437	0.960965	not_sig	0.0117384	0.00381972	0.0105631	0.00329101	0.815195	not_sig
HDL	6	86302034	A	G	0.692	not_sig	-0.00535874	0.00335307	-0.00336502	0.00310524	0.661775	not_sig	-0.00640682	0.00384857	-0.00419901	0.00333926	0.663928	not_sig
TC	6	88166740	T	C	0.3974	not_sig	0.00862844	0.00358466	0.00915454	0.00327846	0.91352	not_sig	0.00775624	0.00407328	0.00865084	0.00348684	0.867132	not_sig
HDL	6	98566506	CT	C	0.8258	not_sig	0.0142852	0.0033518	0.00951006	0.00309785	0.294118	not_sig	0.0155673	0.0038499	0.0106432	0.00333024	0.332054	not_sig
nonHDL	6	100600097	T	C	0.03875	not_sig	-0.0175901	0.00395686	-0.0243429	0.00361996	0.206714	not_sig	-0.0152273	0.00450539	-0.0270881	0.00385396	0.0448537	not_sig
LDL	6	100602753	G	A	0.1365	not_sig	-0.017874	0.00380461	-0.0222633	0.00345085	0.391498	not_sig	-0.0144532	0.00434329	-0.0235401	0.00367724	0.10935	not_sig
logTG	6	100613551	T	C	0.001677	not_sig	-0.00439425	0.00381506	-0.0184947	0.00348266	0.0061959	not_sig	-0.00228792	0.00436982	-0.0198	0.00373695	0.0023	not_sig
TC	6	100613551	T	C	0.8624	not_sig	-0.0194204	0.0038059	-0.0207229	0.00347302	0.799886	not_sig	-0.0175316	0.00432879	-0.0238529	0.00369001	0.265117	not_sig
nonHDL	6	101431977	C	T	0.7156	not_sig	0.00678606	0.00340658	0.00799947	0.00311674	0.792144	not_sig	0.00890732	0.0038762	0.00900284	0.00332204	0.985031	not_sig
TC	6	101431977	C	T	0.7005	not_sig	0.00824649	0.00327119	0.0100363	0.00298233	0.685151	not_sig	0.0108043	0.00371886	0.0114675	0.00317227	0.891786	not_sig
LDL	6	101432314	A	G	0.5458	not_sig	0.00789663	0.00326045	0.00978812	0.00295593	0.666479	not_sig	0.0103119	0.00372058	0.0107514	0.00315291	0.927985	not_sig
LDL	6	106378009	G	T	0.5375	not_sig	-0.0109951	0.00326845	-0.00931607	0.00297237	0.703128	not_sig	-0.0155781	0.00373109	-0.0108696	0.00316905	0.334795	not_sig
logTG	6	106378009	G	T	0.4956	not_sig	-0.0130244	0.00328726	-0.00791714	0.0030075	0.250362	not_sig	-0.0135396	0.00376478	-0.0083842	0.00322921	0.297293	not_sig
nonHDL	6	106378009	G	T	0.5201	not_sig	-0.0155372	0.00341425	-0.010087	0.00313079	0.238077	not_sig	-0.0194337	0.00388668	-0.0118146	0.00333538	0.135774	not_sig
TC	6	106378009	G	T	0.6361	not_sig	-0.0101905	0.00327927	-0.00772763	0.00299904	0.578384	not_sig	-0.0147352	0.00372946	-0.00967261	0.00318867	0.300858	not_sig
logTG	6	107432157	C	A	0.8508	not_sig	0.00863137	0.00329799	0.0124168	0.00301465	0.395582	not_sig	0.00809744	0.00377405	0.0110294	0.00323507	0.554211	not_sig
HDL	6	107444903	G	C	0.9176	not_sig	0.00667182	0.00361119	0.0102366	0.00333538	0.467119	not_sig	0.00905694	0.00415414	0.00903178	0.00358443	0.996331	not_sig
HDL	6	109064220	C	T	0.7688	not_sig	0.0108458	0.00478153	0.0122961	0.00442773	0.823415	not_sig	0.0147446	0.00548683	0.0130985	0.00475693	0.820189	not_sig
logTG	6	109189021	C	G	0.8449	not_sig	0.0166287	0.00396568	0.0165527	0.00362722	0.988695	not_sig	0.0148809	0.00453749	0.0157445	0.00389245	0.884827	not_sig
TC	6	109300661	C	T	0.2121	not_sig	-0.0155865	0.00494565	-0.0134809	0.00451834	0.752612	not_sig	-0.0140722	0.00560449	-0.0157947	0.00479948	0.81492	not_sig
LDL	6	109323519	G	T	0.07158	not_sig	-0.0142191	0.00499289	-0.00982718	0.00453428	0.513764	not_sig	-0.0114518	0.00567969	-0.0118296	0.00482871	0.959471	not_sig
HDL	6	109639710	C	G	0.7903	not_sig	-0.0153213	0.00365746	-0.0196167	0.00337797	0.386957	not_sig	-0.0183752	0.00420333	-0.0198939	0.00363357	0.784011	not_sig
TC	6	116316882	G	T	0.4993	not_sig	0.0222661	0.00332947	0.0199423	0.0030387	0.605191	not_sig	0.0262944	0.00378524	0.0188153	0.00323104	0.131821	not_sig
HDL	6	116327493	A	G	0.1984	not_sig	0.0161586	0.00341236	0.00932332	0.00315192	0.140072	not_sig	0.0203342	0.00392269	0.00962983	0.00338973	0.0384128	not_sig
nonHDL	6	116349041	C	T	0.4387	not_sig	-0.0197912	0.00343553	-0.0151299	0.00314796	0.315803	not_sig	-0.0230867	0.00390846	-0.0147903	0.0033524	0.106179	not_sig
LDL	6	116394819	T	A	0.003046	not_sig	-0.0193686	0.00328973	-0.0142493	0.00298899	0.248117	not_sig	-0.0227393	0.00375342	-0.0140275	0.00318555	0.0759834	not_sig
LDL	6	126873423	G	T	0.7869	not_sig	-0.0176048	0.00430067	-0.0119922	0.00388984	0.331763	not_sig	-0.0199475	0.00490361	-0.0133515	0.00414541	0.302982	not_sig
TC	6	126873423	G	T	0.8383	not_sig	-0.0184023	0.00431475	-0.0119959	0.00392481	0.270734	not_sig	-0.021315	0.00490097	-0.0136755	0.00417094	0.233914	not_sig
HDL	6	127437617	C	T	8.01e-05	sig	-0.0069	0.00335022	-0.0184286	0.00310163	0.0113487	not_sig	-0.00740841	0.00385274	-0.019	0.00333736	0.0231	not_sig
nonHDL	6	127439897	G	C	3.86e-11	sig	0.00599	0.0066264	0.0465444	0.00607229	6.04e-06	sig	0.00681593	0.00755229	0.0481	0.00649081	3.15e-05	sig
logTG	6	127440047	T	C	8.38e-16	sig	0.0289	0.00755297	0.0720425	0.00689842	2.37e-05	sig	0.0337214	0.00865717	0.0745	0.00744517	0.000341	not_sig
logTG	6	130354855	T	C	0.7326	not_sig	0.0125895	0.00355943	0.0131889	0.003247	0.90071	not_sig	0.0150444	0.00407263	0.0120199	0.0034836	0.571462	not_sig
nonHDL	6	130364482	C	T	0.7169	not_sig	0.0112362	0.0034369	0.00922011	0.00314489	0.664311	not_sig	0.0120158	0.00391212	0.00841766	0.00334754	0.483457	not_sig
LDL	6	130367863	T	TA	0.297	not_sig	0.0117978	0.00346332	0.00770214	0.00314118	0.379735	not_sig	0.0127409	0.0039495	0.00669711	0.00334594	0.241684	not_sig
TC	6	130371055	C	T	0.3314	not_sig	0.0102872	0.00330024	0.0063663	0.00301071	0.378785	not_sig	0.0116189	0.00375268	0.00545363	0.00319889	0.209943	not_sig
HDL	6	131931092	T	C	0.348	not_sig	-0.0170995	0.00448352	-0.0107139	0.00415126	0.294652	not_sig	-0.0139674	0.00516255	-0.00822272	0.00446979	0.398908	not_sig
LDL	6	135418916	A	G	0.001556	not_sig	-0.025401	0.00370352	-0.0176679	0.00336049	0.120995	not_sig	-0.0274202	0.00421015	-0.0199621	0.00358072	0.176018	not_sig
nonHDL	6	135418916	A	G	0.01054	not_sig	-0.023127	0.00387311	-0.0172865	0.00354262	0.264509	not_sig	-0.0262057	0.00439114	-0.0199135	0.00377245	0.275754	not_sig
TC	6	135418916	A	G	0.0003406	not_sig	-0.0266513	0.0037158	-0.0182104	0.00339077	0.092446	not_sig	-0.030513	0.0042082	-0.0221632	0.00360296	0.130697	not_sig
HDL	6	135428537	A	C	4.31e-05	sig	-0.0154	0.00375876	-0.00407913	0.00347143	0.026366	not_sig	-0.0173891	0.00430879	-0.00775312	0.00373092	0.0900201	not_sig
HDL	6	137082948	A	G	0.0425	not_sig	-0.0139563	0.00342897	-0.00917	0.00316747	0.303864	not_sig	-0.0133433	0.00394128	-0.0104411	0.00340731	0.576439	not_sig
HDL	6	139261477	G	A	0.1503	not_sig	-0.0114553	0.00448353	-0.00843132	0.00416259	0.62014	not_sig	-0.0198282	0.00516063	-0.00582591	0.00447076	0.0397435	not_sig
LDL	6	139331253	A	G	0.04936	not_sig	0.0151512	0.00424417	0.0169769	0.00386987	0.74991	not_sig	0.0151402	0.00484665	0.0201476	0.00413714	0.430719	not_sig
nonHDL	6	139331253	A	G	0.009507	not_sig	0.0172653	0.00442853	0.0159822	0.00407571	0.830713	not_sig	0.0166722	0.00504518	0.0203951	0.00435572	0.575413	not_sig
TC	6	139331253	A	G	0.1008	not_sig	0.0156377	0.00425754	0.0163324	0.00390388	0.904012	not_sig	0.0162168	0.00484345	0.0214019	0.00416215	0.415555	not_sig
LDL	6	139831981	T	C	2.07e-05	sig	-0.00366	0.00335916	-0.0171275	0.00305859	0.00295109	not_sig	-0.00361381	0.00383819	-0.0171	0.00326457	0.00727	not_sig
nonHDL	6	139835329	A	T	0.0001213	sig	-0.00649617	0.0035076	-0.0211753	0.00322342	0.00200201	not_sig	-0.00789718	0.00399651	-0.0212	0.00343895	0.0115	not_sig
TC	6	139835329	A	T	0.01191	not_sig	-0.00277525	0.00336899	-0.0130761	0.00308638	0.0237741	not_sig	-0.00448952	0.00383524	-0.0138698	0.00328536	0.0625209	not_sig
HDL	6	139835498	T	C	0.0001043	not_sig	0.00928775	0.00339282	0.0193491	0.00314282	0.029141	not_sig	0.00819477	0.00390454	0.0191	0.00338356	0.0347	not_sig
logTG	6	139835498	T	C	5.93e-06	sig	-0.0142	0.00331828	-0.0283939	0.0030375	0.00160055	not_sig	-0.0153088	0.00380285	-0.0276	0.00326511	0.0142	not_sig
logTG	6	140360260	T	A	0.1827	not_sig	-0.00977399	0.00408233	-0.0119476	0.00374498	0.693995	not_sig	-0.00901695	0.00466173	-0.0134597	0.00402133	0.4693	not_sig
TC	6	143268110	G	C	0.1216	not_sig	-0.010787	0.00368786	-0.00768336	0.00336625	0.533088	not_sig	-0.0103473	0.00418644	-0.00866071	0.00357925	0.758809	not_sig
LDL	6	151015562	A	G	0.6822	not_sig	-0.0125759	0.00553599	-0.00835695	0.00506375	0.57283	not_sig	-0.0203728	0.00629805	-0.00988919	0.00539585	0.204956	not_sig
LDL	6	151898506	C	T	0.02885	not_sig	0.0177042	0.00499065	0.0115791	0.00451852	0.3616	not_sig	0.0196198	0.00570422	0.00816683	0.00482198	0.124156	not_sig
nonHDL	6	151898506	C	T	0.03021	not_sig	0.0214475	0.00521081	0.0112221	0.00476415	0.146421	not_sig	0.024001	0.00593768	0.00727912	0.00507966	0.0318838	not_sig
TC	6	151898506	C	T	0.02445	not_sig	0.0194915	0.00500676	0.0123392	0.00455897	0.289515	not_sig	0.0213927	0.00570121	0.0102035	0.00485162	0.133937	not_sig
LDL	6	153043035	G	A	0.564	not_sig	0.010561	0.00418676	0.0120841	0.00379573	0.786966	not_sig	0.0139564	0.00477282	0.0103538	0.00404715	0.563749	not_sig
HDL	6	153462557	A	G	0.01651	not_sig	0.0117468	0.00338636	0.0141988	0.00312914	0.593839	not_sig	0.0123658	0.0038883	0.0127641	0.00336353	0.938072	not_sig
logTG	6	153463135	C	A	0.003646	not_sig	-0.00568603	0.00330994	-0.0101292	0.00302391	0.32032	not_sig	-0.00512605	0.00378311	-0.00967399	0.00324607	0.360267	not_sig
LDL	6	160492613	T	C	0.09468	not_sig	0.0806646	0.0129767	0.0946968	0.0117151	0.420898	not_sig	0.0923692	0.015217	0.0932804	0.0126389	0.963156	not_sig
logTG	6	160501825	G	A	0.535	not_sig	0.0273175	0.00646867	0.0225345	0.00588285	0.583325	not_sig	0.0267083	0.0074307	0.025581	0.00633126	0.907812	not_sig
nonHDL	6	160501825	G	A	0.9874	not_sig	0.0394261	0.00672257	0.0501738	0.00613186	0.236231	not_sig	0.0444849	0.00767324	0.0574466	0.00655011	0.197643	not_sig
TC	6	160501825	G	A	0.6621	not_sig	0.0306414	0.0064535	0.0447907	0.00586591	0.103753	not_sig	0.0371188	0.00736119	0.0513365	0.00625076	0.139863	not_sig
TC	6	161005610	C	T	2.49e-11	sig	0.0667	0.00598317	0.0976364	0.00545338	0.000127441	not_sig	0.0749931	0.00692402	0.104	0.00585416	0.00145	not_sig
HDL	6	161008646	G	A	0.2087	not_sig	-0.0515693	0.00541489	-0.0563429	0.00502448	0.516974	not_sig	-0.0565511	0.00618494	-0.0576729	0.00538996	0.890942	not_sig
logTG	6	161008646	G	A	0.8774	not_sig	0.040091	0.00529466	0.0320243	0.00485582	0.260187	not_sig	0.0367207	0.0060233	0.0314531	0.0052056	0.507019	not_sig
LDL	6	161010118	A	G	6.68e-08	sig	0.0872	0.00597705	0.104782	0.00541783	0.0288105	not_sig	0.0840531	0.00694303	0.106	0.0058331	0.017	not_sig
nonHDL	6	161010118	A	G	2.84e-10	sig	0.0662	0.00624093	0.0940569	0.0057025	0.00096046	not_sig	0.0703097	0.00723601	0.0966	0.00613605	0.00546	not_sig
logTG	6	161520837	G	A	0.3857	not_sig	0.019226	0.00754059	0.00368764	0.00690292	0.127472	not_sig	0.0182953	0.00861964	0.00551967	0.00742051	0.26002	not_sig
HDL	6	161588372	C	T	0.4409	not_sig	-0.0173505	0.00907954	-0.028632	0.00842873	0.361162	not_sig	-0.0139089	0.0103803	-0.0264892	0.00906095	0.359908	not_sig
LDL	6	161659369	C	G	0.7533	not_sig	0.0739611	0.0151564	0.0640939	0.0137394	0.628616	not_sig	0.0695253	0.017657	0.0662159	0.0147484	0.885309	not_sig
nonHDL	6	161659369	C	G	0.5757	not_sig	0.0564871	0.0158322	0.0515312	0.0144507	0.816663	not_sig	0.0577454	0.0184121	0.055405	0.0155183	0.92236	not_sig
TC	6	161659369	C	G	0.7322	not_sig	0.0575212	0.0152086	0.057532	0.0138679	0.999577	not_sig	0.0660628	0.0176543	0.063127	0.0148453	0.898444	not_sig
HDL	6	163033350	A	G	0.173	not_sig	0.0110429	0.00507567	0.00934043	0.00467576	0.804612	not_sig	0.016534	0.0058246	0.00907113	0.0050264	0.33071	not_sig
HDL	6	163745049	A	G	0.9807	not_sig	-0.0121854	0.00336248	-0.00885332	0.00311563	0.466062	not_sig	-0.01337	0.00386347	-0.00883968	0.00335049	0.374366	not_sig
logTG	6	164113762	A	G	0.353	not_sig	-0.0151424	0.00483946	-0.017763	0.00442102	0.68848	not_sig	-0.0158372	0.00552849	-0.0162795	0.0047421	0.951445	not_sig
HDL	7	1051664	T	C	0.8201	not_sig	-0.0146513	0.00338099	-0.0219941	0.00312511	0.109758	not_sig	-0.016591	0.00388342	-0.0236206	0.00335841	0.169774	not_sig
LDL	7	1067906	T	C	0.9108	not_sig	-0.0202565	0.00394198	-0.0175943	0.00359448	0.616775	not_sig	-0.0189235	0.00448618	-0.0170812	0.00382893	0.754108	not_sig
nonHDL	7	1067906	T	C	0.6835	not_sig	-0.0178948	0.00411721	-0.0149263	0.00378961	0.594751	not_sig	-0.0168255	0.00467196	-0.0144646	0.004034	0.701322	not_sig
TC	7	1067906	T	C	0.5791	not_sig	-0.0210292	0.00395496	-0.0205921	0.0036267	0.934901	not_sig	-0.0209982	0.00448383	-0.0214893	0.00385251	0.933614	not_sig
HDL	7	2296552	A	G	0.574	not_sig	0.100488	0.0268739	0.0803306	0.0247591	0.580149	not_sig	0.117472	0.0308152	0.0910312	0.0267586	0.515916	not_sig
LDL	7	2296552	A	G	0.1516	not_sig	0.096821	0.0261175	0.140459	0.0237924	0.215506	not_sig	0.115458	0.0297911	0.143395	0.0255466	0.47534	not_sig
nonHDL	7	2296552	A	G	0.0781	not_sig	0.0791526	0.0272953	0.132252	0.0249181	0.149667	not_sig	0.103039	0.0309776	0.136134	0.0266832	0.416975	not_sig
TC	7	2296552	A	G	0.136	not_sig	0.117069	0.0262223	0.154135	0.0239732	0.295492	not_sig	0.141736	0.0297959	0.161607	0.02567	0.612404	not_sig
logTG	7	5567596	C	T	0.4505	not_sig	0.00766159	0.00347232	0.0112648	0.0031754	0.442557	not_sig	0.0102361	0.00397411	0.0116994	0.003411	0.779346	not_sig
HDL	7	6461310	C	T	0.529	not_sig	0.0221378	0.0038165	0.0204774	0.00352152	0.748496	not_sig	0.0186083	0.00438786	0.0234771	0.00378582	0.399539	not_sig
TC	7	6461310	C	T	0.4011	not_sig	0.0145246	0.00372114	0.0153197	0.00339052	0.874153	not_sig	0.0112623	0.00422968	0.0171082	0.00360426	0.291482	not_sig
LDL	7	8471545	C	T	0.81	not_sig	1.28347	0.543751	1.72311	0.672698	0.610298	not_sig	1.65813	0.657505	NA	NA	NA	NA
HDL	7	12267552	G	A	0.7407	not_sig	-0.00686677	0.00339281	-0.00915606	0.00312871	0.618901	not_sig	-0.00763928	0.00390904	-0.00894409	0.00336583	0.799772	not_sig
logTG	7	12268082	CTTAA	C	0.1498	not_sig	0.00332174	0.00332224	0.00919126	0.00303115	0.190618	not_sig	0.00302884	0.00380913	0.0103871	0.00325499	0.140854	not_sig
HDL	7	15903403	A	T	0.3094	not_sig	0.00571288	0.0034711	0.009571	0.00321316	0.413396	not_sig	0.00520421	0.00398748	0.00932085	0.00345454	0.433958	not_sig
logTG	7	15913588	A	C	0.176	not_sig	-0.0128327	0.00339716	-0.0117511	0.00310864	0.813806	not_sig	-0.0135823	0.00388823	-0.0121378	0.00333693	0.777421	not_sig
nonHDL	7	17284577	T	C	0.9636	not_sig	0.0111035	0.00353227	0.00883285	0.00323309	0.634425	not_sig	0.0134803	0.00401425	0.0113202	0.00344101	0.682042	not_sig
HDL	7	17287106	A	G	0.05324	not_sig	-0.00530455	0.00348205	-0.0124738	0.00321612	0.12935	not_sig	-0.00481868	0.00399743	-0.0135998	0.00345547	0.0956283	not_sig
logTG	7	17287998	A	G	0.6201	not_sig	0.0111953	0.00340525	0.0149468	0.00310787	0.414502	not_sig	0.0125451	0.00389418	0.0182919	0.00333459	0.261005	not_sig
logTG	7	17817037	G	A	0.01403	not_sig	0.0139649	0.00332045	0.00537862	0.00304165	0.0558679	not_sig	0.0138385	0.00380444	0.00543339	0.00326475	0.092723	not_sig
HDL	7	17920613	C	T	0.6336	not_sig	-0.0221911	0.00341883	-0.0182743	0.00316583	0.399254	not_sig	-0.0244909	0.00393421	-0.0201661	0.00340157	0.404361	not_sig
TC	7	17920613	C	T	0.2981	not_sig	-0.00940424	0.00333451	-0.0100405	0.00305092	0.887729	not_sig	-0.00821463	0.00379317	-0.00970757	0.00324214	0.764169	not_sig
LDL	7	21605973	A	G	0.06857	not_sig	0.0274072	0.00392602	0.0350731	0.00356662	0.147262	not_sig	0.0339365	0.00449538	0.0374458	0.003806	0.550221	not_sig
logTG	7	21605973	A	G	0.299	not_sig	0.00368524	0.00394845	0.00827393	0.00360871	0.389669	not_sig	0.00443924	0.00453657	0.00858279	0.00387814	0.486323	not_sig
nonHDL	7	21605973	A	G	0.3018	not_sig	0.024959	0.00410291	0.0349684	0.00375693	0.0711975	not_sig	0.0308313	0.0046858	0.0370125	0.00400645	0.314717	not_sig
TC	7	21605973	A	G	0.249	not_sig	0.0238826	0.00393868	0.0333773	0.00359847	0.0743232	not_sig	0.0320275	0.00449317	0.0363259	0.00382917	0.465316	not_sig
LDL	7	25991826	T	C	0.5952	not_sig	0.0248592	0.00444214	0.0230272	0.00404349	0.759736	not_sig	0.0252165	0.00508636	0.0234188	0.00431398	0.786936	not_sig
logTG	7	25991826	T	C	0.08691	not_sig	-0.0263493	0.00446811	-0.0343191	0.00409099	0.187095	not_sig	-0.0279141	0.0051332	-0.0356133	0.00439577	0.253299	not_sig
nonHDL	7	25991826	T	C	0.1065	not_sig	0.0157239	0.00464296	0.0176794	0.00426134	0.755683	not_sig	0.0144463	0.00530328	0.0178313	0.00454335	0.626928	not_sig
TC	7	25991826	T	C	0.1236	not_sig	0.0174177	0.00445703	0.0211055	0.0040792	0.54049	not_sig	0.0191474	0.00508426	0.0213026	0.00434005	0.746466	not_sig
HDL	7	26397239	C	A	9.72e-05	not_sig	0.0129	0.00335505	0.0174931	0.00310078	0.31129	not_sig	0.0125151	0.00385995	0.017	0.00333185	0.382	not_sig
logTG	7	28180556	T	C	0.3805	not_sig	-0.0100086	0.00326598	-0.00539694	0.00298776	0.296145	not_sig	-0.0118407	0.00373754	-0.00518518	0.00320984	0.175533	not_sig
LDL	7	28215361	G	C	0.01855	not_sig	0.0218292	0.00603553	0.0139078	0.00549016	0.330273	not_sig	0.0265834	0.00692794	0.0187946	0.00586178	0.389451	not_sig
nonHDL	7	28215361	G	C	0.1126	not_sig	0.0191966	0.00630347	0.0183927	0.00578395	0.924925	not_sig	0.0242057	0.00721406	0.0228983	0.00617281	0.890184	not_sig
TC	7	28215361	G	C	0.00992	not_sig	0.0196346	0.0060552	0.010811	0.00553885	0.280949	not_sig	0.0271045	0.00692489	0.0156362	0.00589687	0.206105	not_sig
HDL	7	35671204	CATATATAAATATATATAA	C	0.9257	not_sig	-0.0109569	0.00348762	-0.00727354	0.0032237	0.436742	not_sig	-0.01472	0.0040101	-0.00819814	0.00346564	0.217246	not_sig
TC	7	36170409	T	C	0.6831	not_sig	0.0131694	0.00333423	0.0115796	0.00304218	0.723945	not_sig	0.0139598	0.00378918	0.010453	0.00323635	0.480387	not_sig
LDL	7	36171953	C	T	0.3152	not_sig	0.0140347	0.00419112	0.0219208	0.00381523	0.162927	not_sig	0.0132593	0.00478604	0.0210841	0.00407231	0.211808	not_sig
nonHDL	7	36190426	C	T	0.4338	not_sig	0.0136841	0.00434292	0.01805	0.00399027	0.457895	not_sig	0.0135153	0.0049464	0.0185502	0.00425513	0.439064	not_sig
HDL	7	36192606	T	G	0.2592	not_sig	-0.0139279	0.00338027	-0.00950976	0.00313554	0.336593	not_sig	-0.0139228	0.00388275	-0.00935209	0.00337227	0.372814	not_sig
HDL	7	38265179	CTTGAAAAGACAACCTTTCCCCATTGTACTGAT	C	0.1895	not_sig	0.0109131	0.0034241	0.00956271	0.0031616	0.771394	not_sig	0.0116434	0.00393722	0.00985407	0.00339924	0.730144	not_sig
LDL	7	41746922	C	G	0.6868	not_sig	0.0086888	0.00380299	0.00947472	0.00345816	0.878145	not_sig	0.00875947	0.00433825	0.0112076	0.00368547	0.66629	not_sig
nonHDL	7	41746922	C	G	0.5827	not_sig	0.00911076	0.00397244	0.0108959	0.00364516	0.739877	not_sig	0.00915183	0.00451898	0.013335	0.00388151	0.481345	not_sig
TC	7	41764992	C	T	0.8512	not_sig	0.00950597	0.00379487	0.00735706	0.00346952	0.675156	not_sig	0.00950238	0.0043123	0.00945365	0.00368771	0.993129	not_sig
logTG	7	44197583	G	T	0.8879	not_sig	0.0225271	0.00475179	0.0199911	0.00436341	0.693439	not_sig	0.0209175	0.0054508	0.0236946	0.00469505	0.698689	not_sig
LDL	7	44581986	T	C	0.03232	not_sig	0.0327381	0.00420233	0.0378086	0.00381518	0.370351	not_sig	0.0375082	0.00481149	0.0403329	0.00407612	0.65331	not_sig
nonHDL	7	44581986	T	C	0.3619	not_sig	0.0325901	0.00439135	0.0368167	0.00402154	0.476605	not_sig	0.0384298	0.00501557	0.0390888	0.00429138	0.920257	not_sig
TC	7	44581986	T	C	0.06395	not_sig	0.0286783	0.00421708	0.0355823	0.00384956	0.225327	not_sig	0.0334172	0.0048102	0.039269	0.00410138	0.35327	not_sig
TC	7	50308527	C	T	0.01168	not_sig	0.0066284	0.00350954	0.00760653	0.00320595	0.836523	not_sig	0.00817898	0.00398866	0.00844136	0.00340761	0.960001	not_sig
HDL	7	50308811	G	C	0.2127	not_sig	0.0105245	0.0035998	0.0160588	0.00332746	0.257595	not_sig	0.012583	0.00413815	0.0159592	0.00357658	0.535942	not_sig
HDL	7	72330303	C	T	0.5986	not_sig	0.0136209	0.0102012	0.0176196	0.00941515	0.772696	not_sig	0.0187471	0.0117392	0.0256962	0.0101309	0.653156	not_sig
LDL	7	73020301	T	C	0.06738	not_sig	-0.0329571	0.00801184	-0.0441879	0.00724215	0.29705	not_sig	-0.0352612	0.0092094	-0.0396108	0.0077614	0.717246	not_sig
nonHDL	7	73020301	T	C	0.04102	not_sig	-0.0453477	0.00838114	-0.05048	0.00764375	0.650045	not_sig	-0.0501071	0.00960522	-0.047741	0.00818309	0.850856	not_sig
TC	7	73020301	T	C	0.1843	not_sig	-0.0331648	0.00803732	-0.0386359	0.00730748	0.613525	not_sig	-0.0358652	0.00920542	-0.0384644	0.007809	0.82906	not_sig
logTG	7	73020337	C	G	0.19	not_sig	-0.104609	0.00488174	-0.112237	0.00445154	0.246967	not_sig	-0.104978	0.00557398	-0.114753	0.00477014	0.181535	not_sig
HDL	7	73037366	G	A	0.2777	not_sig	0.0296346	0.00416227	0.0326181	0.00384616	0.597565	not_sig	0.0322781	0.00477223	0.0297733	0.00412713	0.690557	not_sig
HDL	7	74361240	C	T	0.9874	not_sig	-0.0151924	0.00726856	-0.0122404	0.00673532	0.765148	not_sig	-0.0139744	0.00834046	-0.0142641	0.00724206	0.97902	not_sig
nonHDL	7	75612803	C	T	0.2237	not_sig	0.0148263	0.00376282	0.0139889	0.00346233	0.869551	not_sig	0.0167212	0.00428403	0.0126064	0.00369118	0.465598	not_sig
TC	7	75612803	C	T	0.9768	not_sig	0.0127795	0.00361159	0.0121491	0.00331301	0.897367	not_sig	0.0169293	0.00410991	0.0113798	0.00352427	0.304034	not_sig
LDL	7	75614777	G	A	0.5131	not_sig	0.0154935	0.00419326	0.015265	0.00382317	0.967797	not_sig	0.0202865	0.0047894	0.0146085	0.00407929	0.365461	not_sig
logTG	7	75615006	C	T	0.9278	not_sig	0.00911759	0.00360687	0.013747	0.00331043	0.343019	not_sig	0.00530892	0.00413309	0.0117427	0.00355637	0.236725	not_sig
TC	7	77340821	T	A	0.0656	not_sig	0.00822082	0.00360089	0.00440288	0.00328671	0.432288	not_sig	0.00979399	0.00409485	0.00399306	0.0034926	0.279787	not_sig
HDL	7	80300449	T	G	0.05715	not_sig	0.271905	0.341796	0.274398	0.417096	0.9963	not_sig	0.476359	0.378912	0.235	0.455402	0.683	not_sig
HDL	7	80851648	G	C	0.2136	not_sig	0.872432	0.437427	-0.188717	0.399151	0.0723461	not_sig	1.13575	0.496099	-0.265284	0.428206	0.0320537	not_sig
TC	7	81568750	T	G	0.8939	not_sig	-0.00886323	0.00370298	-0.00775639	0.00338853	0.824997	not_sig	-0.00714194	0.00421177	-0.00873606	0.00360345	0.773051	not_sig
logTG	7	81573045	T	A	0.1484	not_sig	-0.00946288	0.00363945	-0.00679832	0.0033318	0.588153	not_sig	-0.00847502	0.00417048	-0.00477871	0.00357808	0.499987	not_sig
nonHDL	7	87074964	T	C	0.004532	not_sig	-0.0077977	0.0044476	-0.0152991	0.00407653	0.21247	not_sig	-0.0125313	0.00505974	-0.0170766	0.0043374	0.494039	not_sig
LDL	7	87076587	C	A	0.1254	not_sig	-0.0106318	0.00424082	-0.0165133	0.00385588	0.303488	not_sig	-0.0155482	0.00483802	-0.0183797	0.0041056	0.65454	not_sig
TC	7	87076587	C	A	0.1639	not_sig	-0.0106227	0.00425492	-0.0149281	0.00389066	0.453961	not_sig	-0.0154199	0.00483615	-0.017297	0.00413114	0.76728	not_sig
HDL	7	94953895	G	A	0.001088	not_sig	-0.00421256	0.00338913	-0.0143661	0.0031238	0.0271741	not_sig	-0.00251497	0.00390058	-0.0173543	0.00336085	0.003852	not_sig
TC	7	94953895	G	A	0.1433	not_sig	-0.00497224	0.00330478	-0.0100637	0.00300979	0.253376	not_sig	-0.00709646	0.00375959	-0.0109581	0.00320139	0.432937	not_sig
nonHDL	7	97915637	A	G	0.2925	not_sig	0.0112398	0.00435777	0.0191878	0.00401043	0.178378	not_sig	0.0124418	0.00495545	0.0197532	0.00426461	0.262124	not_sig
LDL	7	97977268	G	A	0.2459	not_sig	-0.0148318	0.00416847	-0.0202615	0.00380487	0.334688	not_sig	-0.0147153	0.00475154	-0.0206154	0.00404941	0.343299	not_sig
TC	7	97977268	G	A	0.07218	not_sig	-0.0131365	0.0041823	-0.016056	0.00383925	0.606082	not_sig	-0.0136588	0.00474973	-0.0173106	0.00407464	0.558441	not_sig
LDL	7	100280896	A	C	0.2633	not_sig	-0.0232329	0.00536153	-0.0240819	0.00485004	0.906257	not_sig	-0.0309832	0.00611725	-0.0215885	0.00517961	0.239881	not_sig
nonHDL	7	100280896	A	C	0.4912	not_sig	-0.0233804	0.00560277	-0.0223584	0.00510635	0.892454	not_sig	-0.0301189	0.00637397	-0.0195933	0.00545078	0.208222	not_sig
TC	7	100280896	A	C	0.1956	not_sig	-0.0237944	0.0053793	-0.0266783	0.00489322	0.690861	not_sig	-0.0329305	0.00611337	-0.0242327	0.00521138	0.277607	not_sig
nonHDL	7	100873835	A	G	0.1858	not_sig	-0.00286151	0.00381748	-0.00382132	0.00349251	0.85243	not_sig	-0.00153863	0.00434055	-0.0033133	0.00371987	0.75557	not_sig
TC	7	100873835	A	G	0.2747	not_sig	-0.00345496	0.00366626	-0.00366571	0.00334396	0.96603	not_sig	-0.00286041	0.00416501	-0.00325873	0.00355395	0.941846	not_sig
HDL	7	101886704	A	G	0.9163	not_sig	0.00681016	0.00341075	0.00465344	0.00315794	0.641734	not_sig	0.00665064	0.00391996	0.00369999	0.00339411	0.568256	not_sig
TC	7	101928279	G	A	0.4008	not_sig	-0.00758984	0.00327268	-0.00667899	0.00299362	0.836846	not_sig	-0.00813986	0.00371856	-0.00723744	0.00318143	0.853301	not_sig
LDL	7	104638501	A	C	0.8363	not_sig	-0.0161835	0.00507977	-0.00540496	0.00461935	0.115446	not_sig	-0.0144943	0.00578959	-0.00580864	0.00492103	0.251704	not_sig
HDL	7	106801395	C	G	0.313	not_sig	0.0122807	0.00414585	0.0153777	0.00383861	0.582552	not_sig	0.0104824	0.00476332	0.0137846	0.00412279	0.599148	not_sig
logTG	7	106835410	C	T	0.09214	not_sig	-0.0084883	0.00386045	-0.007491	0.00352312	0.848253	not_sig	-0.0084175	0.00443255	-0.00852003	0.00378293	0.985923	not_sig
nonHDL	7	106946195	C	G	0.8551	not_sig	0.00517959	0.00373323	0.00631404	0.00342326	0.822296	not_sig	0.00876764	0.00425669	0.00608693	0.0036484	0.6316	not_sig
LDL	7	107056795	A	G	0.148	not_sig	0.00760063	0.00353004	0.00824318	0.00320383	0.892485	not_sig	0.00900873	0.00403437	0.00780748	0.00341535	0.81974	not_sig
TC	7	107056795	A	G	0.3186	not_sig	0.00492694	0.00354203	0.00636721	0.00323238	0.763273	not_sig	0.00682479	0.00403303	0.00678649	0.00343609	0.994217	not_sig
logTG	7	107624109	C	T	0.222	not_sig	-0.0170381	0.00562082	-0.0134716	0.00513146	0.638423	not_sig	-0.0137585	0.00641825	-0.016339	0.00550648	0.759616	not_sig
TC	7	116305314	C	CA	0.5199	not_sig	-0.0118272	0.00429176	-0.00572983	0.00391755	0.292707	not_sig	-0.0114924	0.00488205	-0.00705484	0.00416639	0.488121	not_sig
logTG	7	116399131	G	A	0.5129	not_sig	0.00733798	0.00351857	0.0128338	0.00321851	0.247798	not_sig	0.00701063	0.00403074	0.0144838	0.00345659	0.158167	not_sig
HDL	7	116982907	G	A	0.6021	not_sig	-0.00466283	0.00351196	-0.00873426	0.00324393	0.393124	not_sig	-0.00581206	0.00403654	-0.00780211	0.0034915	0.708478	not_sig
logTG	7	116982907	G	A	0.7192	not_sig	0.00542429	0.00343419	0.01081	0.00313464	0.245437	not_sig	0.00759162	0.0039293	0.011821	0.00336941	0.412593	not_sig
LDL	7	127015083	G	A	0.9061	not_sig	0.0236988	0.011727	0.0432034	0.0107891	0.219674	not_sig	0.0266082	0.0134663	0.0486496	0.0115006	0.212006	not_sig
TC	7	130275219	G	A	0.1217	not_sig	-0.0101165	0.00460184	-0.00119569	0.0042125	0.151611	not_sig	-0.00922196	0.00522735	-0.00140274	0.00447493	0.254517	not_sig
HDL	7	130429186	T	A	3.82e-17	sig	0.014	0.00336303	0.0364076	0.00310132	9.25e-07	sig	0.0137921	0.00386934	0.0333	0.00333546	0.000128	not_sig
logTG	7	130429186	T	A	4.21e-19	sig	-0.0155	0.00328503	-0.0382436	0.00299608	3.07e-07	sig	-0.0153999	0.00376369	-0.0379	0.00321797	5.19e-06	sig
nonHDL	7	130432538	A	T	2.03e-08	sig	-0.00581	0.00340461	-0.0222464	0.0031112	0.000353177	not_sig	-0.00518914	0.00387674	-0.024	0.00331534	0.000217	not_sig
LDL	7	130442141	C	G	0.0001495	not_sig	0.00370691	0.00352093	0.0194829	0.00318704	0.000865148	not_sig	0.000743911	0.00401783	0.0206	0.00340116	0.000155	not_sig
HDL	7	137561861	A	G	0.5654	not_sig	-0.0829284	0.065417	-0.173924	0.0621734	0.311981	not_sig	-0.0728991	0.0779348	-0.192428	0.0661921	0.241124	not_sig
LDL	7	137561861	A	G	0.175	not_sig	0.00681893	0.0629979	-0.22016	0.0588533	0.00828781	not_sig	0.00516817	0.0744341	-0.243817	0.0619716	0.00994528	not_sig
TC	7	137561861	A	G	0.1519	not_sig	-0.0265494	0.0632736	-0.259063	0.0591655	0.00711208	not_sig	-0.0139856	0.0744811	-0.289233	0.0620969	0.00442438	not_sig
HDL	7	139036598	G	T	0.9874	not_sig	0.0126272	0.00397206	0.00396769	0.00368116	0.108837	not_sig	0.012876	0.00456825	0.0032734	0.00396051	0.111245	not_sig
logTG	7	149180625	C	G	0.7853	not_sig	-0.00839153	0.00376288	-0.00735439	0.00343817	0.838323	not_sig	-0.00839794	0.0043057	-0.00646712	0.00368934	0.732757	not_sig
logTG	7	150214465	T	G	0.1314	not_sig	-0.0121149	0.00387925	-0.0165697	0.00354128	0.395059	not_sig	-0.0118067	0.00443867	-0.0160377	0.00380153	0.467857	not_sig
HDL	7	150537635	G	A	0.3653	not_sig	-0.0142537	0.00366068	-0.0148358	0.00338341	0.906784	not_sig	-0.013106	0.00421617	-0.0153464	0.00363996	0.686714	not_sig
nonHDL	7	155024830	G	A	0.5704	not_sig	0.0242785	0.00651826	0.0201428	0.00603904	0.640709	not_sig	0.0239978	0.00744846	0.0160566	0.0064557	0.419162	not_sig
TC	7	155024830	G	A	0.953	not_sig	0.0240923	0.00626037	0.022348	0.0057901	0.837479	not_sig	0.0258862	0.00714737	0.019757	0.00617539	0.515258	not_sig
LDL	7	155026807	T	C	0.9597	not_sig	0.0262498	0.00618888	0.020832	0.00568505	0.517969	not_sig	0.0245407	0.00709143	0.0172385	0.00608023	0.433116	not_sig
TC	7	158511941	T	C	0.03129	not_sig	0.000951146	0.003552	-0.0105024	0.00324529	0.01698	not_sig	0.00225861	0.00403923	-0.00776887	0.00345076	0.0583983	not_sig
nonHDL	7	158583806	C	T	0.07826	not_sig	0.0036991	0.00739271	0.021718	0.00672735	0.0706539	not_sig	-0.000343847	0.00842868	0.0176141	0.00717352	0.103746	not_sig
logTG	8	4780903	G	A	0.2838	not_sig	-0.0080697	0.00341472	-0.00531003	0.00312914	0.550184	not_sig	-0.00652816	0.00390874	-0.00472492	0.00336042	0.725748	not_sig
LDL	8	6600349	T	C	0.3832	not_sig	0.00682943	0.00346687	0.0127511	0.00314827	0.204801	not_sig	0.00647242	0.00395155	0.0127656	0.0033597	0.223741	not_sig
TC	8	6600349	T	C	0.01674	not_sig	0.00667977	0.00347855	0.0153299	0.00317648	0.0655666	not_sig	0.00747895	0.00394974	0.0168	0.00338034	0.0735	not_sig
HDL	8	6620392	A	G	0.02341	not_sig	-0.00878108	0.00386786	-0.0120811	0.00356979	0.529543	not_sig	-0.0111086	0.00444376	-0.0163014	0.00384055	0.375318	not_sig
logTG	8	8316637	C	T	0.9291	not_sig	-0.0079472	0.00329786	-0.00741962	0.00301426	0.905742	not_sig	-0.00941772	0.00377733	-0.00727125	0.00323562	0.665196	not_sig
LDL	8	8569030	C	T	0.368	not_sig	0.0088476	0.00376225	0.0108128	0.00342205	0.698398	not_sig	0.00963293	0.00429564	0.0136302	0.00364784	0.476927	not_sig
HDL	8	9183596	A	G	0.5908	not_sig	0.0801917	0.00582327	0.0719127	0.00535122	0.293835	not_sig	0.0878374	0.00666149	0.0755288	0.00574429	0.160567	not_sig
LDL	8	9183596	A	G	0.04294	not_sig	0.0577735	0.00565378	0.0471845	0.00511635	0.163758	not_sig	0.0628357	0.00641784	0.0472495	0.00544567	0.0633307	not_sig
TC	8	9183596	A	G	0.4954	not_sig	0.074472	0.00567211	0.0675457	0.00516238	0.365158	not_sig	0.0808514	0.00641533	0.0682915	0.00547944	0.135493	not_sig
nonHDL	8	9183664	A	G	0.0196	not_sig	0.0558856	0.00589998	0.0418025	0.005377	0.0768754	not_sig	0.0596472	0.00668206	0.0417645	0.00571877	0.0414662	not_sig
logTG	8	9195638	C	T	0.4793	not_sig	-0.00562444	0.00390862	-0.00711934	0.0035667	0.776948	not_sig	-0.00879439	0.00448212	-0.0064463	0.00383488	0.689777	not_sig
LDL	8	9723964	T	A	0.006432	not_sig	-0.00819921	0.00399538	-0.00940945	0.00363206	0.822167	not_sig	-0.0105546	0.00455599	-0.00929404	0.00387339	0.832599	not_sig
TC	8	9723964	T	A	0.01622	not_sig	-0.0111484	0.00400881	-0.0123588	0.00366465	0.823163	not_sig	-0.0120802	0.00455403	-0.0129642	0.00389741	0.882446	not_sig
HDL	8	9788582	A	G	0.9884	not_sig	0.0120621	0.00406396	0.0101531	0.00375709	0.729434	not_sig	0.0102782	0.00467041	0.0115663	0.00404138	0.83435	not_sig
HDL	8	10643164	C	T	0.6893	not_sig	-0.0192368	0.00416785	-0.016668	0.00384822	0.649768	not_sig	-0.0180504	0.00478626	-0.0180787	0.00414064	0.996419	not_sig
logTG	8	10643164	C	T	0.2337	not_sig	0.0265962	0.00407375	0.0227057	0.0037176	0.479332	not_sig	0.0256972	0.00465473	0.0223983	0.00399338	0.589638	not_sig
LDL	8	10643233	G	T	0.9856	not_sig	-0.0062139	0.00329573	-0.00401435	0.00299352	0.620323	not_sig	-0.00558317	0.00376435	-0.00401985	0.00319299	0.750804	not_sig
logTG	8	11528339	G	C	0.1168	not_sig	0.0258106	0.00486873	0.0232965	0.00445999	0.702596	not_sig	0.0275468	0.00558197	0.0233892	0.00479259	0.570938	not_sig
TC	8	11702594	G	C	0.1616	not_sig	0.0168955	0.00369359	0.00977094	0.00338532	0.153891	not_sig	0.0182678	0.0042005	0.0111836	0.00360085	0.199159	not_sig
HDL	8	11854888	T	G	0.5527	not_sig	0.00022985	0.00335403	0.00385772	0.00310804	0.426277	not_sig	0.00096717	0.00385758	0.0043106	0.00334429	0.511385	not_sig
HDL	8	12617942	T	A	0.2732	not_sig	-0.0155009	0.00369118	-0.00840702	0.00340012	0.15635	not_sig	-0.0167606	0.00425375	-0.00927289	0.0036579	0.180793	not_sig
logTG	8	13506575	A	G	0.05966	not_sig	-0.00844361	0.00340795	-0.0058945	0.003123	0.580272	not_sig	-0.00616885	0.00390363	-0.00770875	0.00335433	0.764166	not_sig
logTG	8	17616562	C	T	0.8041	not_sig	-0.0099632	0.00343688	-0.00672546	0.00314129	0.48562	not_sig	-0.00816371	0.0039309	-0.00620694	0.00337116	0.704759	not_sig
HDL	8	17800472	C	T	0.8949	not_sig	-0.00802447	0.00344874	-0.00849275	0.0031937	0.920421	not_sig	-0.00950278	0.0039623	-0.00813309	0.00343245	0.793325	not_sig
logTG	8	18272535	C	T	0.02587	not_sig	-0.0351977	0.00393384	-0.0263975	0.00360174	0.0980238	not_sig	-0.0362734	0.00451493	-0.0272253	0.00387536	0.127298	not_sig
TC	8	18272635	T	C	0.01331	not_sig	-0.0253322	0.00392833	-0.0264833	0.00359585	0.8284	not_sig	-0.0312982	0.00447735	-0.0306008	0.00383104	0.905541	not_sig
nonHDL	8	18272881	G	A	0.4092	not_sig	-0.0280598	0.00408516	-0.0282745	0.00375118	0.969021	not_sig	-0.0332657	0.00465798	-0.0313073	0.00400298	0.749164	not_sig
LDL	8	18273300	G	C	0.01498	not_sig	-0.0220509	0.00389112	-0.0229625	0.0035384	0.862005	not_sig	-0.0268662	0.00444815	-0.0266713	0.00378066	0.973295	not_sig
HDL	8	19251679	T	C	0.7096	not_sig	0.0552631	0.0188948	0.0718608	0.0177561	0.520933	not_sig	0.0594979	0.0217498	0.069429	0.0191916	0.731358	not_sig
logTG	8	19251679	T	C	0.5935	not_sig	-0.0498225	0.0184998	-0.0550193	0.0171778	0.836458	not_sig	-0.053582	0.0212037	-0.0505161	0.0185349	0.913071	not_sig
logTG	8	19820916	C	T	0.002323	not_sig	-0.159435	0.00540987	-0.1448	0.00495351	0.0454172	not_sig	-0.162768	0.00614029	-0.146378	0.00530086	0.0427576	not_sig
HDL	8	19823648	A	T	5.54e-14	sig	0.106	0.0037037	0.0825551	0.00343026	2.18e-06	sig	0.109199	0.00424722	0.0815	0.00368194	7.64e-07	sig
nonHDL	8	19830921	C	T	0.1389	not_sig	-0.0434417	0.00515547	-0.0478337	0.00473842	0.529375	not_sig	-0.0514975	0.00582774	-0.0509363	0.00503393	0.941746	not_sig
logTG	8	20610866	T	C	0.6281	not_sig	-0.00732939	0.00330128	-0.00870454	0.00301855	0.757879	not_sig	-0.00882515	0.00378389	-0.007385	0.0032402	0.771903	not_sig
LDL	8	21918089	A	C	0.831	not_sig	-0.0185283	0.00428315	-0.0157279	0.00389791	0.627755	not_sig	-0.0190846	0.00487609	-0.015589	0.00415267	0.584186	not_sig
nonHDL	8	21918089	A	C	0.9113	not_sig	-0.0180517	0.004474	-0.014874	0.00411173	0.599989	not_sig	-0.0196302	0.00507999	-0.0143537	0.00437916	0.43018	not_sig
TC	8	21918089	A	C	0.5596	not_sig	-0.0162028	0.00429763	-0.0133243	0.00393286	0.620264	not_sig	-0.0160378	0.00487444	-0.0128224	0.00417834	0.615526	not_sig
LDL	8	23358480	T	TG	0.8717	not_sig	-0.00438561	0.00328428	-0.00540258	0.00298368	0.818227	not_sig	-0.00616857	0.00374258	-0.0068587	0.00317864	0.887921	not_sig
TC	8	23358480	T	TG	0.8126	not_sig	-0.00408122	0.00329502	-0.0050377	0.00301039	0.829845	not_sig	-0.00556914	0.00374046	-0.0065098	0.00319825	0.848005	not_sig
logTG	8	23525075	T	A	0.5703	not_sig	0.00767463	0.00385503	0.00833013	0.00350893	0.899657	not_sig	0.00857187	0.00441304	0.00704532	0.0037656	0.791886	not_sig
HDL	8	25464670	G	T	0.1131	not_sig	-0.0213868	0.00382994	-0.00892965	0.00354606	0.0166984	not_sig	-0.0230855	0.00440408	-0.00867718	0.00381319	0.0131334	not_sig
logTG	8	25464690	G	T	0.002364	not_sig	-0.0191128	0.00327189	-0.00591852	0.00299303	0.00284784	not_sig	-0.021243	0.00374143	-0.00548349	0.00321295	0.00135362	not_sig
logTG	8	26203081	G	A	0.3957	not_sig	0.00772678	0.00361099	0.00922186	0.00330268	0.759325	not_sig	0.008336	0.00413482	0.00936784	0.00354286	0.849292	not_sig
LDL	8	29024943	G	A	0.1759	not_sig	-0.0999744	0.0124077	-0.0506489	0.0113697	0.00329192	not_sig	-0.104883	0.0140398	-0.0565881	0.0120898	0.00895388	not_sig
nonHDL	8	29024943	G	A	0.3505	not_sig	-0.0896043	0.0129505	-0.0445337	0.012034	0.0105725	not_sig	-0.093983	0.0146048	-0.0504401	0.012805	0.0245788	not_sig
TC	8	29024943	G	A	0.1301	not_sig	-0.0909933	0.012438	-0.0468295	0.0114667	0.00884874	not_sig	-0.0951052	0.014021	-0.0571958	0.0121591	0.0405325	not_sig
HDL	8	34519519	G	A	0.4771	not_sig	0.00882648	0.00380211	0.00908611	0.00351192	0.959882	not_sig	0.00968684	0.00437434	0.00942079	0.00377578	0.963176	not_sig
HDL	8	36848357	T	C	0.004088	not_sig	-0.00533753	0.00450592	-0.0110546	0.00416519	0.350157	not_sig	-0.00283355	0.00518663	-0.0111183	0.00449022	0.22591	not_sig
logTG	8	36853213	C	T	0.2887	not_sig	0.00933902	0.00442057	0.0110007	0.00404445	0.780931	not_sig	0.0091577	0.00506498	0.00965749	0.0043539	0.940187	not_sig
logTG	8	37385495	A	C	0.9461	not_sig	-0.0275505	0.00839313	-0.019023	0.00759917	0.450095	not_sig	-0.028799	0.00956374	-0.0193587	0.00815582	0.451371	not_sig
logTG	8	38328302	A	G	0.3121	not_sig	0.00553476	0.00332998	0.0116243	0.00304716	0.176107	not_sig	0.0071937	0.00381253	0.0124162	0.00326962	0.297102	not_sig
HDL	8	38328902	G	A	0.3135	not_sig	-0.00532126	0.00340621	-0.0114318	0.003152	0.18672	not_sig	-0.00468389	0.00391704	-0.0097408	0.00338625	0.327415	not_sig
TC	8	41542093	G	A	0.00759	not_sig	-0.0387781	0.00892164	-0.0246652	0.00814299	0.24135	not_sig	-0.045184	0.0101485	-0.0193285	0.00867198	0.0521112	not_sig
TC	8	55422440	C	T	0.9676	not_sig	0.0178125	0.00400988	0.0221815	0.00365587	0.419449	not_sig	0.0176113	0.00457208	0.0227735	0.00389383	0.388718	not_sig
LDL	8	55437524	A	G	0.796	not_sig	0.0176743	0.00399581	0.0224556	0.00362366	0.374095	not_sig	0.0168053	0.0045736	0.0224831	0.00387033	0.341981	not_sig
nonHDL	8	55441799	A	G	0.3525	not_sig	0.0164823	0.00417833	0.0231679	0.00381464	0.236041	not_sig	0.0165271	0.00476882	0.0236788	0.00407223	0.252796	not_sig
logTG	8	59388565	T	C	0.814	not_sig	-0.0218792	0.00345065	-0.0255845	0.00316738	0.42763	not_sig	-0.0208834	0.00395834	-0.0265143	0.00340167	0.279323	not_sig
LDL	8	59392324	G	A	0.2041	not_sig	-0.0311978	0.00343595	-0.0386405	0.003134	0.108534	not_sig	-0.028495	0.00392877	-0.0399294	0.00334217	0.0262237	not_sig
nonHDL	8	59392324	G	A	0.3513	not_sig	-0.032807	0.003592	-0.0399787	0.00330312	0.140554	not_sig	-0.0307323	0.00409602	-0.0416145	0.00352007	0.0433332	not_sig
TC	8	59392324	G	A	0.06198	not_sig	-0.0321439	0.00344737	-0.0388421	0.00316214	0.151051	not_sig	-0.0305761	0.00392697	-0.0404768	0.00336272	0.0548206	not_sig
HDL	8	60654261	G	A	0.6835	not_sig	-0.0111991	0.00376222	-0.00692825	0.00349413	0.404223	not_sig	-0.0126034	0.00432259	-0.00936807	0.0037561	0.571031	not_sig
LDL	8	61409871	G	T	0.01058	not_sig	0.015786	0.00338092	0.00890736	0.00306226	0.130505	not_sig	0.0126754	0.00386192	0.00908816	0.00326408	0.476861	not_sig
logTG	8	61531713	A	T	0.2251	not_sig	0.00891608	0.00339135	0.00367027	0.00309035	0.25159	not_sig	0.00715642	0.00388656	0.00247878	0.00331716	0.35864	not_sig
nonHDL	8	61539278	A	T	0.02023	not_sig	0.0169401	0.00352534	0.00903252	0.00321944	0.0967308	not_sig	0.013766	0.00401775	0.00899518	0.00342903	0.365106	not_sig
TC	8	61539278	A	T	0.01196	not_sig	0.0188972	0.00338314	0.0120256	0.00308128	0.132114	not_sig	0.0156728	0.00384964	0.0124313	0.00327497	0.520155	not_sig
logTG	8	64622944	A	AT	0.8341	not_sig	-0.0066611	0.00421636	-0.012943	0.00385946	0.270443	not_sig	-0.00866028	0.00482317	-0.0131867	0.00415	0.475632	not_sig
HDL	8	64799004	T	G	0.6729	not_sig	0.0118524	0.00335017	0.00952764	0.00309572	0.609308	not_sig	0.0108039	0.00384573	0.0100245	0.0033287	0.877879	not_sig
HDL	8	71196058	C	A	0.1347	not_sig	-0.0185786	0.00562083	-0.0220775	0.00518604	0.646399	not_sig	-0.0202956	0.00648609	-0.0185144	0.00557464	0.834576	not_sig
HDL	8	72459582	A	G	0.2552	not_sig	-0.0186817	0.00621368	-0.0256952	0.0057285	0.405312	not_sig	-0.0198978	0.00716159	-0.0257714	0.006176	0.53341	not_sig
logTG	8	72466324	G	A	0.001694	not_sig	0.0111529	0.0038099	0.0196664	0.00347384	0.0977612	not_sig	0.0109596	0.00436234	0.0202457	0.00373143	0.104784	not_sig
nonHDL	8	72466324	G	A	0.1425	not_sig	0.00514314	0.00395935	0.0158801	0.00362136	0.0447953	not_sig	0.00568999	0.00450583	0.0152737	0.00385993	0.105287	not_sig
LDL	8	74888494	C	T	0.3412	not_sig	-0.007549	0.00348196	-0.0159869	0.00316724	0.0722377	not_sig	-0.00579819	0.00397476	-0.0162895	0.00337688	0.0436883	not_sig
nonHDL	8	74899700	G	T	0.05779	not_sig	-0.0063346	0.00363821	-0.0161545	0.00334041	0.046186	not_sig	-0.00520232	0.00414299	-0.0155098	0.00355876	0.0584321	not_sig
TC	8	74899700	G	T	0.274	not_sig	-0.00625911	0.00349307	-0.0146961	0.00319486	0.0739014	not_sig	-0.00585392	0.0039725	-0.0141685	0.00339661	0.110672	not_sig
LDL	8	81357702	C	T	0.4186	not_sig	0.00278355	0.00358086	0.00577818	0.00324858	0.534534	not_sig	0.0050138	0.00408342	0.00842038	0.00346616	0.523632	not_sig
TC	8	81357702	C	T	0.557	not_sig	0.00421064	0.0035923	0.00723558	0.00327756	0.532774	not_sig	0.00487694	0.00408092	0.00936159	0.00348724	0.402172	not_sig
logTG	8	82404216	T	C	0.6448	not_sig	-0.00851515	0.00365924	-0.0100168	0.00332932	0.760845	not_sig	-0.0111021	0.00418419	-0.00866418	0.00357184	0.656785	not_sig
HDL	8	103876183	G	A	0.935	not_sig	0.0162973	0.00433555	0.0155039	0.00400857	0.892817	not_sig	0.0191088	0.0049824	0.0172822	0.004309	0.780976	not_sig
HDL	8	106385695	C	A	0.6763	not_sig	-0.00718589	0.00334707	-0.00643408	0.00309824	0.868712	not_sig	-0.00729358	0.00384782	-0.00855609	0.00333043	0.803537	not_sig
logTG	8	106433378	T	C	0.19	not_sig	0.00969789	0.00407026	0.010907	0.00371508	0.825866	not_sig	0.00963396	0.00465687	0.0118306	0.00398851	0.719417	not_sig
HDL	8	116597635	T	C	6.49e-05	sig	0.0268	0.00337653	0.0359692	0.00312214	0.0466155	not_sig	0.0274909	0.00388462	0.0376	0.00335669	0.0493	not_sig
logTG	8	116638975	T	C	0.8354	not_sig	0.0203754	0.00595502	0.0213973	0.00542664	0.898794	not_sig	0.0229106	0.00683761	0.0195741	0.00583533	0.70975	not_sig
LDL	8	116657911	T	G	0.3544	not_sig	-0.0283319	0.00361379	-0.0239538	0.0032861	0.36876	not_sig	-0.0296308	0.0041173	-0.027453	0.0034993	0.686099	not_sig
TC	8	116658583	G	T	0.4085	not_sig	-0.0291039	0.00363205	-0.0256548	0.0033218	0.482255	not_sig	-0.0318119	0.00412225	-0.0293851	0.00352735	0.653767	not_sig
nonHDL	8	116659578	G	C	0.2208	not_sig	-0.0268034	0.00377826	-0.0236328	0.00346248	0.535001	not_sig	-0.0283098	0.00429384	-0.0266336	0.00368444	0.766408	not_sig
HDL	8	121872464	A	C	0.04427	not_sig	-0.0155605	0.00359479	-0.0165002	0.00332202	0.847328	not_sig	-0.0163264	0.00413494	-0.0197515	0.00357216	0.529645	not_sig
TC	8	121872464	A	C	0.6963	not_sig	-0.00838471	0.00350408	-0.00231014	0.00319953	0.199235	not_sig	-0.0105095	0.0039844	-0.00574951	0.00340204	0.362279	not_sig
logTG	8	125756010	C	A	0.9989	not_sig	0.0203454	0.0074318	0.00704402	0.00672954	0.183393	not_sig	0.0205912	0.00853107	0.00805118	0.00722293	0.260627	not_sig
LDL	8	126500031	C	G	0.1672	not_sig	-0.0756135	0.00333004	-0.0644837	0.00302165	0.0130643	not_sig	-0.0797691	0.00379597	-0.0652886	0.00321956	0.00353185	not_sig
logTG	8	126500031	C	G	2.45e-07	sig	-0.0854	0.00334926	-0.0727293	0.0030572	0.00503538	not_sig	-0.0890015	0.00383025	-0.074	0.00328055	0.00286	not_sig
nonHDL	8	126500031	C	G	5.03e-07	sig	-0.088	0.00347893	-0.0716475	0.00318441	0.000506256	not_sig	-0.0958098	0.00395583	-0.0737	0.0033903	2.06e-05	sig
TC	8	126500031	C	G	1.2e-06	sig	-0.0734	0.00334138	-0.0605091	0.00304861	0.00440894	not_sig	-0.0818303	0.00379441	-0.0636	0.00323923	0.000242	not_sig
HDL	8	126507308	T	C	0.02302	not_sig	0.0339465	0.0036488	0.0328377	0.00338206	0.82316	not_sig	0.0309833	0.00421989	0.027745	0.00364592	0.560376	not_sig
logTG	8	129567373	C	T	0.1474	not_sig	0.0159018	0.00512537	0.0196527	0.00465251	0.586867	not_sig	0.0185772	0.00586138	0.0185045	0.0049872	0.992437	not_sig
HDL	8	144296480	G	C	0.0992	not_sig	0.0261377	0.00429129	0.0358678	0.00398947	0.0958668	not_sig	0.0255294	0.00492692	0.0385276	0.0042896	0.046019	not_sig
logTG	8	144306970	G	A	0.2265	not_sig	-0.0152289	0.00423268	-0.0124626	0.00388156	0.629084	not_sig	-0.0158297	0.00484167	-0.0153966	0.00416844	0.945804	not_sig
TC	8	145040856	G	T	0.6828	not_sig	0.0140964	0.003413	0.0166318	0.00310466	0.581607	not_sig	0.0181847	0.00388047	0.0182901	0.00330231	0.983446	not_sig
LDL	8	145051484	C	T	0.3867	not_sig	0.0186134	0.00339341	0.0181939	0.0030715	0.926777	not_sig	0.0207702	0.00387381	0.0198496	0.00327571	0.855623	not_sig
nonHDL	8	145051484	C	T	0.9722	not_sig	0.0183627	0.00354799	0.0173768	0.00323614	0.836888	not_sig	0.0209078	0.00403931	0.0186006	0.00344901	0.66315	not_sig
logTG	9	1033773	C	G	0.5818	not_sig	0.0097085	0.00355483	0.0111814	0.0032432	0.758886	not_sig	0.00987884	0.00406929	0.0103589	0.00348438	0.928406	not_sig
HDL	9	1038666	C	T	0.3429	not_sig	-0.0107871	0.00398107	-0.0103531	0.00367403	0.935972	not_sig	-0.00988383	0.00457995	-0.00933553	0.00395294	0.92759	not_sig
logTG	9	2622278	G	A	0.4749	not_sig	-0.00765336	0.00343002	-0.0086143	0.00313671	0.835764	not_sig	-0.00865986	0.00392177	-0.0091875	0.0033663	0.918463	not_sig
LDL	9	2640759	A	G	0.8166	not_sig	-0.0341551	0.00654977	-0.0257758	0.00594979	0.342327	not_sig	-0.0294292	0.00745142	-0.0244457	0.0063247	0.609152	not_sig
nonHDL	9	2640759	A	G	0.7486	not_sig	-0.0315728	0.00684032	-0.0211877	0.00626733	0.261651	not_sig	-0.0283079	0.00776056	-0.0198248	0.00665595	0.405398	not_sig
TC	9	2640759	A	G	0.895	not_sig	-0.0335961	0.00657079	-0.0252013	0.00600316	0.344235	not_sig	-0.030354	0.0074478	-0.0241581	0.00636423	0.525955	not_sig
HDL	9	5073770	G	T	0.03226	not_sig	0.308591	0.137286	-0.0382736	0.13538	0.0712292	not_sig	0.28805	0.1535	0.121539	0.161144	0.453096	not_sig
TC	9	5073770	G	T	0.5136	not_sig	-0.029371	0.134504	0.0634415	0.133413	0.623233	not_sig	-0.0732186	0.151782	0.252672	0.155765	0.13294	not_sig
logTG	9	6666512	A	T	0.6494	not_sig	0.0124153	0.00472172	0.00780445	0.00432335	0.470164	not_sig	0.0097313	0.00539574	0.00466675	0.00464586	0.475695	not_sig
TC	9	6667928	C	A	0.5556	not_sig	0.0119988	0.00473178	0.00907123	0.00433105	0.647198	not_sig	0.0114278	0.00536974	0.00726702	0.00460833	0.555445	not_sig
HDL	9	13452771	A	G	0.6075	not_sig	0.00528375	0.00351396	0.00766838	0.00323851	0.616797	not_sig	0.0035697	0.00404423	0.00751359	0.00348527	0.458843	not_sig
logTG	9	13697152	A	C	0.4518	not_sig	-0.00501261	0.00331382	-0.011757	0.00302456	0.131706	not_sig	-0.00562482	0.00379649	-0.0120091	0.00324589	0.199959	not_sig
HDL	9	14068327	A	C	0.8863	not_sig	0.00784234	0.00421883	0.0124495	0.00390263	0.421474	not_sig	0.0092563	0.00485177	0.0106166	0.00419317	0.831559	not_sig
HDL	9	15304782	C	A	0.006241	not_sig	0.0411306	0.00480555	0.0496655	0.00444012	0.190841	not_sig	0.0412791	0.00552169	0.0496132	0.00476528	0.251881	not_sig
logTG	9	15304782	C	A	0.5335	not_sig	0.016561	0.00469288	0.0146396	0.00429249	0.761925	not_sig	0.0196399	0.00536945	0.0159554	0.00460078	0.60131	not_sig
TC	9	15304782	C	A	0.4959	not_sig	0.028757	0.0046825	0.025602	0.00428068	0.618008	not_sig	0.0311886	0.00532011	0.0256126	0.00454304	0.424154	not_sig
nonHDL	9	16884586	T	A	0.2225	not_sig	-0.017219	0.00353036	-0.0136627	0.00323525	0.456445	not_sig	-0.0215502	0.00402165	-0.0148046	0.00344919	0.20171	not_sig
LDL	9	16900695	A	G	0.1536	not_sig	-0.0153715	0.00335249	-0.0108674	0.00304472	0.31861	not_sig	-0.0190175	0.00382833	-0.0106497	0.00324774	0.0946522	not_sig
TC	9	16900695	A	G	0.03661	not_sig	-0.0140466	0.00336371	-0.00946044	0.00307176	0.312694	not_sig	-0.0187946	0.00382656	-0.00956138	0.00326751	0.065768	not_sig
HDL	9	16901067	C	A	0.9201	not_sig	0.00620854	0.00352701	0.00801015	0.00325996	0.706801	not_sig	0.00336185	0.00406072	0.00720398	0.00350817	0.472789	not_sig
logTG	9	16901067	C	A	0.8292	not_sig	-0.00845367	0.00344857	-0.00974498	0.00314949	0.781581	not_sig	-0.00833822	0.00395288	-0.00919487	0.00338425	0.868884	not_sig
HDL	9	19254604	G	A	0.4966	not_sig	0.0212259	0.00629038	0.0202343	0.00580735	0.907539	not_sig	0.0285807	0.00728246	0.0230707	0.00626564	0.565209	not_sig
nonHDL	9	19313913	A	G	0.632	not_sig	0.0231633	0.00637645	0.028971	0.00582772	0.500197	not_sig	0.025104	0.00730582	0.0315599	0.00623115	0.500194	not_sig
LDL	9	19323815	G	A	0.02887	not_sig	0.0241163	0.00609839	0.0335206	0.00553379	0.252139	not_sig	0.026772	0.00700444	0.0339015	0.00591891	0.435633	not_sig
TC	9	19352260	A	T	0.01457	not_sig	0.0281165	0.00607301	0.0360525	0.00554782	0.333309	not_sig	0.0335509	0.00694944	0.0373233	0.0059173	0.67855	not_sig
TC	9	22090301	C	A	0.01912	not_sig	-0.0102737	0.00332978	-0.00966524	0.00304341	0.892405	not_sig	-0.0082427	0.00378634	-0.0087656	0.00323574	0.916158	not_sig
LDL	9	22103341	T	G	0.2117	not_sig	-0.00855314	0.00325141	-0.00636205	0.00295721	0.617138	not_sig	-0.0075725	0.00370749	-0.0059984	0.00315305	0.7457	not_sig
nonHDL	9	22124504	A	T	0.2292	not_sig	-0.0109325	0.00339779	-0.00656768	0.00311572	0.342404	not_sig	-0.00748969	0.00386369	-0.00505468	0.00331932	0.631686	not_sig
HDL	9	28410683	T	C	0.2452	not_sig	-0.0100439	0.00356191	-0.0095406	0.00330416	0.917256	not_sig	-0.00973468	0.00409558	-0.0100005	0.00355236	0.960794	not_sig
logTG	9	28414625	C	T	0.7374	not_sig	0.00773059	0.00348217	0.00504233	0.00318943	0.568086	not_sig	0.00822877	0.00398597	0.00581629	0.00342399	0.645248	not_sig
logTG	9	32450187	T	C	0.8206	not_sig	-0.00373903	0.00340034	-0.00789565	0.00311334	0.365951	not_sig	-0.00483234	0.00389334	-0.00790186	0.00333978	0.548476	not_sig
HDL	9	32523737	T	C	0.9971	not_sig	0.00771287	0.00341595	0.00700983	0.00316626	0.879691	not_sig	0.00753098	0.0039249	0.0075713	0.00340523	0.993791	not_sig
HDL	9	33128429	A	G	0.395	not_sig	-0.003875	0.00334822	-0.00735571	0.00309968	0.444288	not_sig	-0.00192802	0.00384782	-0.00860448	0.00333189	0.188404	not_sig
logTG	9	34151463	C	T	0.125	not_sig	-0.00924765	0.00333293	-0.00452373	0.00305313	0.294629	not_sig	-0.0090266	0.00381715	-0.00359212	0.00327998	0.278905	not_sig
HDL	9	34175780	C	T	0.3193	not_sig	0.00811669	0.00335122	0.00451943	0.00310675	0.429893	not_sig	0.00951121	0.00385331	0.0040742	0.00334098	0.285064	not_sig
LDL	9	78212428	A	G	0.1933	not_sig	0.0133992	0.00354099	0.0119491	0.00321409	0.761082	not_sig	0.015673	0.00403414	0.0112035	0.00342425	0.397012	not_sig
TC	9	78212428	A	G	0.6936	not_sig	0.0112367	0.00355261	0.00967571	0.00324296	0.744868	not_sig	0.0134127	0.00403196	0.00980089	0.00344541	0.494677	not_sig
nonHDL	9	78214833	G	A	0.7627	not_sig	-0.0134568	0.0037294	-0.0106628	0.00341388	0.579477	not_sig	-0.0139852	0.00423742	-0.0104138	0.00363513	0.521227	not_sig
LDL	9	78729213	T	C	0.511	not_sig	-0.0146187	0.00335186	-0.0128889	0.00305254	0.702006	not_sig	-0.0127916	0.00382565	-0.0132021	0.00325494	0.934677	not_sig
nonHDL	9	78729213	T	C	0.8594	not_sig	-0.0135702	0.00350039	-0.0123069	0.00321615	0.789863	not_sig	-0.0114233	0.00398336	-0.0125105	0.00342734	0.835647	not_sig
TC	9	78729213	T	C	0.8851	not_sig	-0.0127157	0.00336322	-0.0117182	0.00307985	0.826382	not_sig	-0.0111886	0.00382424	-0.0119845	0.0032749	0.874047	not_sig
logTG	9	86626769	T	A	0.1842	not_sig	0.0134227	0.00374525	0.0178896	0.00343077	0.377829	not_sig	0.0152086	0.00428899	0.0192465	0.00368243	0.473833	not_sig
HDL	9	88940359	C	T	0.7135	not_sig	0.056446	0.0220974	0.0692918	0.020691	0.670457	not_sig	0.061277	0.0256149	0.0638957	0.0222458	0.938306	not_sig
LDL	9	91434086	G	A	0.6659	not_sig	-0.0179761	0.0067934	-0.0130532	0.0061908	0.591196	not_sig	-0.0215585	0.00773488	-0.0134722	0.006585	0.424747	not_sig
TC	9	91454519	C	T	0.9246	not_sig	-0.017216	0.00679251	-0.015617	0.00622363	0.861827	not_sig	-0.021879	0.00770322	-0.0179	0.00660223	0.694116	not_sig
logTG	9	92215734	T	C	0.844	not_sig	0.0115707	0.00329903	0.0111867	0.00301347	0.931332	not_sig	0.0116037	0.00378187	0.0127684	0.00323405	0.814438	not_sig
HDL	9	93944244	C	T	0.4838	not_sig	0.0157723	0.00430627	0.0108067	0.00397682	0.395612	not_sig	0.0155387	0.00495046	0.0116126	0.00427109	0.54709	not_sig
logTG	9	95445032	G	C	0.2366	not_sig	0.0100133	0.00430094	0.0125416	0.00394678	0.66406	not_sig	0.00970994	0.00492419	0.0117489	0.00423885	0.753006	not_sig
logTG	9	96970677	A	G	0.1471	not_sig	0.00818928	0.00354251	0.00313748	0.00323413	0.29093	not_sig	0.0073904	0.00405317	0.00301961	0.00347596	0.411748	not_sig
TC	9	100640410	G	A	0.6765	not_sig	0.00797415	0.00342068	0.00772558	0.00311596	0.957039	not_sig	0.00785826	0.00388856	0.0072572	0.00331078	0.906057	not_sig
HDL	9	100784050	A	C	0.8356	not_sig	0.0066417	0.00368643	0.0114067	0.0033997	0.340672	not_sig	0.00532868	0.00423425	0.0128018	0.00365495	0.180343	not_sig
logTG	9	102119689	T	TA	0.52	not_sig	-0.00879682	0.00357793	-0.00719271	0.00328042	0.740359	not_sig	-0.00761592	0.00409259	-0.00863764	0.00352461	0.849554	not_sig
HDL	9	102247368	A	G	0.1089	not_sig	-0.00632957	0.00346745	-0.00634447	0.00321437	0.997479	not_sig	-0.00748215	0.00398048	-0.00771014	0.00345336	0.965396	not_sig
HDL	9	105805994	T	G	0.7237	not_sig	-0.320394	0.129924	-0.378666	0.131198	0.751645	not_sig	-0.360676	0.152476	-0.427717	0.143743	0.748347	not_sig
TC	9	106526397	C	A	0.956	not_sig	-0.0286316	0.0248735	-0.0445131	0.0236361	0.642554	not_sig	-0.00175877	0.0282633	-0.0486794	0.0249685	0.212179	not_sig
HDL	9	106532723	TA	T	0.1908	not_sig	0.0539766	0.0206658	0.0429249	0.0193343	0.695351	not_sig	0.0598072	0.0237812	0.0432799	0.0207575	0.599569	not_sig
HDL	9	107093784	G	T	0.7877	not_sig	-0.233253	0.0526049	-0.322959	0.0475367	0.204537	not_sig	-0.222624	0.0601385	-0.339724	0.050164	0.133781	not_sig
TC	9	107093784	G	T	0.6838	not_sig	-0.0793104	0.0512876	-0.188566	0.0458116	0.11113	not_sig	-0.0599506	0.0576456	-0.18964	0.0476712	0.0821286	not_sig
HDL	9	107661742	A	C	0.001936	not_sig	-0.0501963	0.00380008	-0.0655652	0.00351252	0.00289947	not_sig	-0.0587674	0.00436534	-0.0717	0.00376904	0.0243	not_sig
nonHDL	9	107661742	A	C	0.7808	not_sig	-0.0285166	0.00385988	-0.0271929	0.00353568	0.799822	not_sig	-0.0294766	0.00438853	-0.0287671	0.00375901	0.902013	not_sig
TC	9	107661742	A	C	0.0002712	not_sig	-0.0432119	0.00370444	-0.0509405	0.00338495	0.122487	not_sig	-0.0467625	0.00420641	-0.0543	0.00359231	0.172	not_sig
LDL	9	107664301	C	T	0.9707	not_sig	-0.027483	0.00373721	-0.0266581	0.00339508	0.86987	not_sig	-0.0292139	0.00425697	-0.029	0.00361271	0.969349	not_sig
logTG	9	107665978	C	G	0.00241	not_sig	-0.0222437	0.00500139	-0.0232279	0.00457066	0.884189	not_sig	-0.0233805	0.00571787	-0.0223664	0.00489036	0.892494	not_sig
TC	9	108179115	T	G	0.8987	not_sig	0.101973	0.0876324	0.062705	0.0832119	0.744542	not_sig	0.114481	0.0978063	0.0416216	0.0875111	0.577737	not_sig
HDL	9	109062494	C	A	0.3101	not_sig	-0.0778463	0.0854128	-0.0920595	0.0807321	0.903477	not_sig	-0.0601279	0.096847	-0.109428	0.0845367	0.700564	not_sig
HDL	9	110112471	G	C	0.3061	not_sig	0.0898706	0.0673205	-0.0375099	0.0568563	0.147187	not_sig	0.10098	0.0776821	-0.0512415	0.0608487	0.121912	not_sig
logTG	9	110488875	C	A	0.9338	not_sig	-0.0178694	0.0101165	-0.0264012	0.00920161	0.531567	not_sig	-0.0202766	0.0115275	-0.0249377	0.00984133	0.757806	not_sig
TC	9	110530324	A	G	0.6047	not_sig	-0.0107145	0.0036213	-0.00902065	0.00330298	0.728936	not_sig	-0.0142583	0.00412113	-0.00892007	0.00351189	0.32285	not_sig
TC	9	112223059	A	G	0.4805	not_sig	-0.00660931	0.00350755	-0.0118757	0.00320812	0.266577	not_sig	-0.00617132	0.00398079	-0.0125872	0.00340922	0.219636	not_sig
logTG	9	112245773	G	C	0.4443	not_sig	-0.0232822	0.00873791	-0.0352916	0.00797341	0.308651	not_sig	-0.0294557	0.00999899	-0.0372848	0.00854156	0.550523	not_sig
nonHDL	9	112247790	G	GA	0.7172	not_sig	-0.0145954	0.00906713	-0.0230462	0.00830672	0.490742	not_sig	-0.0212897	0.010299	-0.0253224	0.00882922	0.765635	not_sig
HDL	9	112556911	T	C	0.4946	not_sig	0.00547411	0.0040243	0.011762	0.00371421	0.24958	not_sig	0.0112389	0.0046339	0.00999228	0.00399754	0.838145	not_sig
HDL	9	113830547	C	T	0.2401	not_sig	0.0105438	0.00356419	0.00751202	0.00328987	0.5308	not_sig	0.0112237	0.00409588	0.00738895	0.00353415	0.477206	not_sig
logTG	9	117083803	C	A	0.5323	not_sig	0.00310201	0.00649212	-0.0159933	0.00594397	0.0296009	not_sig	0.00384558	0.00742239	-0.0119377	0.00638361	0.105958	not_sig
LDL	9	117133524	G	A	0.9779	not_sig	-0.0127537	0.00588262	-0.0147751	0.00533421	0.798521	not_sig	-0.0130768	0.00671527	-0.011848	0.00569064	0.888668	not_sig
nonHDL	9	117133524	G	A	0.8634	not_sig	-0.0146184	0.00614572	-0.0169968	0.00562924	0.774749	not_sig	-0.0126978	0.00700459	-0.0140091	0.0059995	0.886627	not_sig
HDL	9	117148430	G	T	0.3849	not_sig	0.0109687	0.00336797	0.0142451	0.00311735	0.474055	not_sig	0.00976808	0.00387323	0.0149079	0.00335294	0.314385	not_sig
TC	9	117148430	G	T	0.4955	not_sig	0.0099641	0.00328391	0.0131311	0.00300539	0.4756	not_sig	0.00574561	0.00373379	0.0105438	0.00319618	0.327614	not_sig
HDL	9	123480600	C	A	0.3446	not_sig	-0.00610296	0.00364235	-0.00799498	0.0033632	0.701943	not_sig	-0.00465921	0.00419076	-0.0085468	0.00361602	0.48126	not_sig
logTG	9	123481206	T	A	0.6081	not_sig	0.0106693	0.00356338	0.00799508	0.00325144	0.578278	not_sig	0.00877601	0.00408064	0.00852247	0.00349049	0.962237	not_sig
HDL	9	126539944	A	G	0.003882	not_sig	-0.013602	0.00698837	-0.0252017	0.00651184	0.223326	not_sig	-0.0100455	0.00804935	-0.0223847	0.00701939	0.246645	not_sig
TC	9	130758224	G	A	0.8988	not_sig	0.00965395	0.133264	0.091734	0.139356	0.669476	not_sig	-0.0965398	0.151008	0.052272	0.148484	0.481044	not_sig
nonHDL	9	130770031	G	A	0.164	not_sig	-0.00451019	0.00825506	0.00966052	0.00759904	0.205344	not_sig	-0.0039796	0.00940308	0.00956307	0.00808087	0.273384	not_sig
nonHDL	9	131466489	G	T	0.816	not_sig	-0.0214577	0.00483157	-0.0186089	0.00441927	0.662641	not_sig	-0.0236478	0.00549175	-0.0201611	0.00470541	0.628769	not_sig
TC	9	131466489	G	T	0.8133	not_sig	-0.0280247	0.0046398	-0.0198729	0.00422917	0.192897	not_sig	-0.0322718	0.00526511	-0.0227333	0.00449412	0.167058	not_sig
LDL	9	131468740	G	A	0.6432	not_sig	-0.0273885	0.00462326	-0.0187661	0.00419035	0.165837	not_sig	-0.0312232	0.00526633	-0.0211631	0.0044653	0.144009	not_sig
HDL	9	131561110	G	A	0.4811	not_sig	-0.0135232	0.00392083	-0.00921375	0.00361224	0.417604	not_sig	-0.0150616	0.00450797	-0.0100501	0.00388129	0.398233	not_sig
HDL	9	132214501	G	C	0.321	not_sig	0.0041889	0.00337705	0.00810374	0.0031195	0.39316	not_sig	0.00615963	0.00388071	0.0071373	0.00335465	0.848435	not_sig
HDL	9	136141870	C	T	2.86e-07	sig	0.0113	0.00429142	0.0223021	0.00398428	0.0595219	not_sig	0.0118653	0.00495541	0.025	0.00429601	0.0443	not_sig
nonHDL	9	136141870	C	T	0.67	not_sig	0.0521515	0.00435894	0.0522387	0.00401033	0.988223	not_sig	0.0591364	0.00498172	0.0548013	0.00428433	0.508231	not_sig
TC	9	136141870	C	T	0.1309	not_sig	0.0528388	0.00418445	0.0577183	0.00383687	0.388756	not_sig	0.0600642	0.00477774	0.0609735	0.00409017	0.884726	not_sig
LDL	9	136149399	G	A	0.6705	not_sig	0.0583906	0.0041688	0.0570897	0.00380207	0.817164	not_sig	0.0640269	0.00477724	0.0595008	0.00406448	0.469329	not_sig
logTG	9	137175998	G	A	0.0595	not_sig	-0.0105153	0.0096488	-0.0249418	0.0087898	0.267709	not_sig	-0.00395474	0.011049	-0.024378	0.00940945	0.158206	not_sig
HDL	9	137268682	C	T	0.9579	not_sig	-0.012076	0.00386224	-0.00406657	0.00357156	0.126814	not_sig	-0.0140117	0.00444317	-0.005243	0.00383965	0.13431	not_sig
nonHDL	9	139108324	A	G	0.6098	not_sig	-0.00871621	0.00339889	-0.0131755	0.00311099	0.33181	not_sig	-0.00878816	0.00387023	-0.0144311	0.0033144	0.266787	not_sig
TC	9	139108324	A	G	0.7941	not_sig	-0.00857041	0.00326286	-0.0112758	0.00298035	0.539285	not_sig	-0.00871182	0.00371112	-0.0115225	0.00316892	0.563573	not_sig
LDL	9	139371405	G	C	0.03199	not_sig	-0.0154803	0.00363472	-0.010694	0.00329637	0.32801	not_sig	-0.0198136	0.00414477	-0.0128778	0.00351014	0.200375	not_sig
HDL	9	139973820	C	T	0.004893	not_sig	0.00799108	0.00344132	0.0110196	0.00319455	0.517786	not_sig	0.00994798	0.00395308	0.0103198	0.00343632	0.943249	not_sig
TC	10	5247302	T	C	0.2303	not_sig	0.0214398	0.00450791	0.0139534	0.00411234	0.218579	not_sig	0.0221501	0.00512398	0.0140455	0.00437737	0.227854	not_sig
HDL	10	5257647	G	A	0.6869	not_sig	-0.0153972	0.00462044	-0.0117918	0.00426899	0.565478	not_sig	-0.0142428	0.00531209	-0.0117535	0.00459578	0.722321	not_sig
logTG	10	5267191	A	G	0.4849	not_sig	-0.0211932	0.00451302	-0.0184785	0.00411948	0.655957	not_sig	-0.0217965	0.00516657	-0.0191175	0.00442788	0.692993	not_sig
nonHDL	10	8089033	A	G	0.5755	not_sig	0.0120069	0.00426722	0.0116373	0.00391017	0.948944	not_sig	0.00822438	0.00484499	0.00979625	0.00416738	0.805188	not_sig
TC	10	8099021	T	C	0.6902	not_sig	0.014944	0.00433057	0.0121698	0.00395157	0.635127	not_sig	0.0134172	0.00491406	0.0120478	0.00419976	0.831773	not_sig
HDL	10	13574659	G	C	0.7061	not_sig	0.00326147	0.00335926	0.00887479	0.00310476	0.218492	not_sig	0.00300891	0.00386053	0.00959827	0.00333775	0.195412	not_sig
LDL	10	17259642	C	G	0.02364	not_sig	0.00720392	0.00329932	0.0129438	0.00299564	0.196503	not_sig	0.00820333	0.00376201	0.0144766	0.00319354	0.202403	not_sig
nonHDL	10	17259642	C	G	0.2147	not_sig	0.0085992	0.00344693	0.0157855	0.00315784	0.12319	not_sig	0.0082209	0.00391945	0.0165594	0.0033633	0.105454	not_sig
TC	10	17259642	C	G	0.2197	not_sig	0.0121215	0.00331019	0.0179046	0.00302252	0.195762	not_sig	0.0130325	0.00376026	0.0184086	0.00321319	0.275752	not_sig
HDL	10	17265447	T	C	0.1852	not_sig	0.0133288	0.00339248	0.00878038	0.00313807	0.323662	not_sig	0.0155055	0.00389747	0.00868407	0.00337329	0.184498	not_sig
HDL	10	33630848	A	G	0.1374	not_sig	-0.0163407	0.00576355	-0.0206767	0.00534729	0.580243	not_sig	-0.018627	0.00663307	-0.0227208	0.00575875	0.640262	not_sig
logTG	10	33633866	G	A	0.38	not_sig	0.00708511	0.00562364	0.0168827	0.00515093	0.19764	not_sig	0.00436174	0.00644268	0.0188372	0.00553939	0.0875711	not_sig
LDL	10	43918823	T	A	0.215	not_sig	-0.0134407	0.00370592	-0.00813589	0.00337051	0.288283	not_sig	-0.0113778	0.00422778	-0.00726885	0.00359128	0.457628	not_sig
LDL	10	45953767	A	G	0.08609	not_sig	0.00623322	0.00349529	0.0095874	0.00317135	0.476056	not_sig	0.00393308	0.00399478	0.00924904	0.00338221	0.308492	not_sig
nonHDL	10	45957247	C	CA	0.5029	not_sig	0.00448895	0.00397866	0.00955735	0.00363282	0.345505	not_sig	0.00206788	0.00453473	0.0105514	0.00386951	0.153574	not_sig
TC	10	45958856	G	C	0.04573	not_sig	0.0113857	0.0038138	0.018598	0.00347353	0.160915	not_sig	0.00934467	0.00434269	0.0195144	0.00369198	0.0736029	not_sig
HDL	10	46026107	G	A	0.1353	not_sig	0.0211026	0.00392476	0.0265	0.0036149	0.310426	not_sig	0.0222316	0.00452032	0.02696	0.00388653	0.426411	not_sig
LDL	10	52573772	C	T	0.6182	not_sig	0.105162	0.0163669	0.064859	0.0146343	0.0656598	not_sig	0.111106	0.0189537	0.0657382	0.0157577	0.0649458	not_sig
logTG	10	52573772	C	T	0.9838	not_sig	0.107668	0.0164594	0.0924688	0.0148042	0.491143	not_sig	0.0967203	0.0191203	0.0941164	0.0160561	0.916712	not_sig
nonHDL	10	52573772	C	T	0.4801	not_sig	0.11861	0.0171159	0.0752807	0.0153511	0.0587887	not_sig	0.123066	0.0197636	0.0786472	0.0165024	0.0836511	not_sig
TC	10	52573772	C	T	0.4593	not_sig	0.107535	0.0164225	0.0606155	0.0147585	0.0330984	not_sig	0.112648	0.0189411	0.066229	0.0158485	0.0594729	not_sig
TC	10	54533360	A	G	0.1455	not_sig	0.00453543	0.00466527	0.00692665	0.00427232	0.704651	not_sig	0.0056079	0.0053016	0.00649582	0.00454849	0.898576	not_sig
LDL	10	54534837	A	T	0.3602	not_sig	0.00573712	0.00465181	0.00892227	0.00423868	0.611791	not_sig	0.00672739	0.00530715	0.00757756	0.00452485	0.902712	not_sig
HDL	10	61409469	G	A	0.9204	not_sig	-0.00944958	0.00340421	-0.0109842	0.00314995	0.74004	not_sig	-0.00870278	0.00391624	-0.0128051	0.00338929	0.427048	not_sig
logTG	10	61469090	C	T	0.6332	not_sig	0.016267	0.00388675	0.0135845	0.00354474	0.609101	not_sig	0.0146688	0.00444607	0.016388	0.00380723	0.768374	not_sig
HDL	10	63837006	G	A	0.005559	not_sig	0.00597504	0.00339327	0.00984339	0.0031382	0.401318	not_sig	0.0060754	0.0038969	0.00972934	0.00337179	0.47707	not_sig
logTG	10	63837016	C	T	0.009685	not_sig	-0.00712923	0.00331689	-0.0143765	0.00303352	0.105921	not_sig	-0.00495926	0.00379403	-0.0148845	0.00325473	0.0464827	not_sig
HDL	10	64988931	A	T	6.22e-11	sig	0.0011	0.00334425	0.0187548	0.00309832	0.00010286	not_sig	0.00155497	0.00384646	0.0196	0.00333195	0.000371	not_sig
LDL	10	65128619	G	A	0.02823	not_sig	0.0114562	0.00325535	0.00821573	0.00296039	0.460215	not_sig	0.0112607	0.00371316	0.00726629	0.0031564	0.411148	not_sig
logTG	10	65191645	G	T	0.6125	not_sig	-0.0218268	0.00326881	-0.0254025	0.0029913	0.418388	not_sig	-0.0207364	0.00374291	-0.0240829	0.00321184	0.496254	not_sig
TC	10	70409357	T	C	0.3141	not_sig	-0.0141224	0.00511669	-0.0104535	0.00465601	0.594858	not_sig	-0.0120174	0.00581793	-0.0112237	0.00495534	0.917049	not_sig
LDL	10	71094504	T	C	0.07777	not_sig	-0.0332308	0.00519531	-0.0179881	0.0047288	0.0295747	not_sig	-0.0355349	0.00589833	-0.0182946	0.00503327	0.0257791	not_sig
nonHDL	10	71094504	T	C	0.04723	not_sig	-0.0314058	0.00541951	-0.0162691	0.00498234	0.0392231	not_sig	-0.0334068	0.00613348	-0.0172301	0.00530255	0.0454255	not_sig
TC	10	71094504	T	C	0.05904	not_sig	-0.0348965	0.00521154	-0.0197578	0.00477047	0.0316622	not_sig	-0.0379123	0.0058952	-0.020077	0.00506358	0.0213731	not_sig
HDL	10	71941078	A	G	0.3334	not_sig	-0.00296698	0.00346748	-0.0107394	0.00319381	0.0982708	not_sig	-0.00594966	0.00398316	-0.0112418	0.00343362	0.312925	not_sig
LDL	10	74665640	C	A	0.9776	not_sig	-0.00765566	0.0079636	-0.0166434	0.00725861	0.402918	not_sig	-0.00296781	0.00907202	-0.0199608	0.00774697	0.153194	not_sig
nonHDL	10	74665640	C	A	0.2948	not_sig	0.00365713	0.00833709	-0.012583	0.00765219	0.150134	not_sig	0.00882538	0.00946562	-0.0157897	0.00816356	0.0483051	not_sig
HDL	10	74666065	G	A	0.6351	not_sig	-0.0164268	0.00776485	-0.00964572	0.00719287	0.52059	not_sig	-0.0240497	0.00890535	-0.0073534	0.00774557	0.156033	not_sig
logTG	10	74710484	G	C	0.4576	not_sig	0.0248855	0.00575705	0.0141466	0.00524645	0.166806	not_sig	0.0288779	0.00657945	0.0154151	0.00564308	0.119367	not_sig
TC	10	74712546	T	C	0.5696	not_sig	0.000545261	0.00572935	-0.0082621	0.00522014	0.254512	not_sig	0.00254038	0.00650244	-0.00798523	0.00555967	0.217316	not_sig
HDL	10	76861680	T	C	0.04933	not_sig	-0.00454452	0.00339682	-0.00983797	0.00314323	0.251397	not_sig	-0.00356801	0.00390313	-0.00868266	0.00337829	0.320449	not_sig
logTG	10	77257376	T	C	0.09798	not_sig	-0.0140899	0.00492515	-0.0149391	0.00451331	0.898566	not_sig	-0.0124646	0.00563585	-0.0140892	0.00484738	0.826535	not_sig
HDL	10	80954251	G	A	0.8568	not_sig	0.0100833	0.00339232	0.0149222	0.00313197	0.293276	not_sig	0.0117877	0.00389909	0.0148109	0.00336896	0.556321	not_sig
TC	10	81074125	T	A	0.1647	not_sig	0.00803512	0.00340335	0.0108252	0.00310233	0.543486	not_sig	0.00447144	0.00386483	0.0107188	0.00329758	0.21755	not_sig
logTG	10	81094251	A	C	0.5346	not_sig	0.00786132	0.00386769	0.0108506	0.00352993	0.567021	not_sig	0.00538564	0.00442936	0.010666	0.00378986	0.363722	not_sig
nonHDL	10	82284512	A	T	0.8014	not_sig	0.00856048	0.00419489	0.00527349	0.00384594	0.562475	not_sig	0.00448766	0.0047719	0.00419121	0.00409547	0.962297	not_sig
TC	10	82284512	A	T	0.7599	not_sig	0.00934068	0.00402475	0.00493149	0.00368247	0.417656	not_sig	0.00518701	0.00457321	0.00443865	0.003914	0.900789	not_sig
LDL	10	89805410	C	A	0.5814	not_sig	-0.0272343	0.00885269	-0.0345933	0.00806027	0.537657	not_sig	-0.0299527	0.0100895	-0.041444	0.00856974	0.384055	not_sig
nonHDL	10	89805410	C	A	0.5798	not_sig	-0.0308692	0.00923073	-0.0374585	0.00848772	0.598244	not_sig	-0.0323216	0.0104925	-0.045445	0.00901775	0.341524	not_sig
TC	10	89805410	C	A	0.1549	not_sig	-0.0255396	0.00887849	-0.0346666	0.00813174	0.447146	not_sig	-0.027575	0.0100813	-0.0427466	0.00862088	0.251421	not_sig
LDL	10	91002804	C	T	0.1847	not_sig	-0.00741783	0.00343808	-0.00820286	0.00312173	0.865392	not_sig	-0.011921	0.00392904	-0.00955002	0.00332782	0.644265	not_sig
nonHDL	10	91010157	A	G	0.8038	not_sig	-0.00847637	0.00340463	-0.00587522	0.00312548	0.5725	not_sig	-0.0105885	0.00387881	-0.00736384	0.00333055	0.527083	not_sig
TC	10	91011692	T	G	0.1465	not_sig	-0.00903287	0.00331586	-0.00763978	0.00303429	0.75595	not_sig	-0.0111107	0.00377208	-0.00761729	0.00322663	0.480377	not_sig
HDL	10	93575831	G	A	0.1917	not_sig	-0.0238267	0.0069163	-0.00868443	0.00640132	0.107129	not_sig	-0.022522	0.00795921	-0.00924123	0.00687925	0.205552	not_sig
logTG	10	93622950	TGTTTTTTCA	T	0.3036	not_sig	0.0275771	0.00674063	0.0178445	0.00616894	0.285478	not_sig	0.0311484	0.00772334	0.0177881	0.00662171	0.187879	not_sig
logTG	10	94215014	C	CTTGA	0.7404	not_sig	0.0271599	0.00532438	0.0206873	0.00488518	0.369065	not_sig	0.0302149	0.00610882	0.0212465	0.00524915	0.264184	not_sig
HDL	10	94274809	A	G	0.3916	not_sig	-0.0191397	0.00539863	-0.016788	0.00501504	0.748944	not_sig	-0.0148553	0.0062236	-0.0155813	0.00539353	0.929562	not_sig
LDL	10	94839642	G	A	0.006609	not_sig	-0.0213624	0.00326452	-0.0195402	0.00296626	0.678679	not_sig	-0.0243973	0.00372567	-0.0213506	0.00316325	0.531922	not_sig
HDL	10	94839724	G	T	0.2866	not_sig	0.0149166	0.00335952	0.014979	0.00310656	0.989082	not_sig	0.0166412	0.00386286	0.0142166	0.00334036	0.634019	not_sig
logTG	10	94839724	G	T	0.2189	not_sig	-0.0264902	0.00328425	-0.0240131	0.00300216	0.576682	not_sig	-0.0278749	0.00376029	-0.0245699	0.00322433	0.503459	not_sig
nonHDL	10	94839724	G	T	0.4415	not_sig	-0.0257855	0.00341258	-0.0214908	0.00312684	0.352134	not_sig	-0.0279007	0.00388357	-0.0236021	0.00333121	0.399536	not_sig
TC	10	94839724	G	T	0.07171	not_sig	-0.0193134	0.00327644	-0.0162735	0.00299378	0.492184	not_sig	-0.0224127	0.00372524	-0.0186658	0.00318382	0.443261	not_sig
HDL	10	95340811	T	G	0.2442	not_sig	-0.0100488	0.00462325	-0.0196568	0.00427793	0.126116	not_sig	-0.00947321	0.00531455	-0.0215431	0.00459988	0.0850805	not_sig
logTG	10	95342772	A	T	0.002427	not_sig	0.0197622	0.00515559	0.0297461	0.00472574	0.152286	not_sig	0.021749	0.00590853	0.0309149	0.00507703	0.238069	not_sig
logTG	10	96015793	C	G	0.05804	not_sig	-0.0123707	0.00330024	-0.00139055	0.00301843	0.0138206	not_sig	-0.0130407	0.00377356	-0.000430077	0.00323873	0.0109947	not_sig
TC	10	96023077	T	C	0.0002677	not_sig	-0.0103024	0.00329234	0.000566864	0.00301009	0.0145547	not_sig	-0.0101529	0.00373801	0.000756	0.00319814	0.0262	not_sig
LDL	10	96032866	T	C	0.0006453	not_sig	-0.012339	0.00356252	0.0023515	0.00323632	0.00220828	not_sig	-0.0120306	0.00406269	0.00242	0.00344913	0.00655	not_sig
nonHDL	10	96038686	G	A	0.002425	not_sig	-0.0116287	0.00343066	0.00180948	0.00314395	0.0037815	not_sig	-0.011483	0.00389806	0.00149981	0.00334672	0.0112786	not_sig
HDL	10	101912194	C	T	0.5271	not_sig	0.0114398	0.00333534	0.00950627	0.00309498	0.670027	not_sig	0.0136669	0.00383297	0.00803211	0.00332943	0.265751	not_sig
logTG	10	101912194	C	T	0.7775	not_sig	0.0121911	0.00326091	0.00669043	0.00298959	0.212455	not_sig	0.0118493	0.00373098	0.00854323	0.00321206	0.500707	not_sig
nonHDL	10	102003906	G	C	0.2436	not_sig	0.0158318	0.00341248	0.00908689	0.00313368	0.144325	not_sig	0.0147435	0.00388088	0.00755207	0.00333861	0.158949	not_sig
TC	10	102003906	G	C	0.4905	not_sig	0.0181271	0.0032753	0.0111962	0.00299791	0.117517	not_sig	0.0181046	0.00372092	0.00940984	0.0031882	0.0751858	not_sig
LDL	10	102075479	G	A	0.7494	not_sig	0.020978	0.00433751	0.0148407	0.0039407	0.293643	not_sig	0.0226499	0.00496652	0.0148424	0.00421048	0.229209	not_sig
logTG	10	104142294	G	A	0.3829	not_sig	-0.0172847	0.00645456	-0.024349	0.00592828	0.418914	not_sig	-0.0157913	0.00737662	-0.025453	0.00636257	0.319965	not_sig
HDL	10	113934384	G	C	0.04331	not_sig	-0.0300826	0.00374952	-0.0293378	0.00346173	0.883642	not_sig	-0.0319403	0.00431284	-0.0320585	0.00372316	0.983402	not_sig
logTG	10	113934384	G	C	0.2099	not_sig	0.0129463	0.00366624	0.0139033	0.00334489	0.846678	not_sig	0.0149037	0.00419844	0.0157741	0.00359199	0.87449	not_sig
TC	10	113934384	G	C	4.17e-05	sig	-0.0159	0.00365756	-0.0311772	0.00333561	0.00200432	not_sig	-0.015976	0.00415885	-0.0327	0.00354695	0.00216	not_sig
LDL	10	113940329	T	C	0.01514	not_sig	-0.0122598	0.00364696	-0.0252121	0.00330782	0.00834137	not_sig	-0.0120119	0.00416257	-0.026083	0.00352728	0.0097081	not_sig
nonHDL	10	113949664	T	C	0.0003735	not_sig	-0.00677885	0.00382316	-0.0228501	0.00349817	0.00187139	not_sig	-0.00542668	0.00435286	-0.023504	0.00372763	0.00156118	not_sig
TC	10	114711983	A	G	0.6441	not_sig	0.00771228	0.00327227	0.0101971	0.00298988	0.574025	not_sig	0.00837599	0.00372199	0.0111876	0.00317636	0.564492	not_sig
HDL	10	115786233	G	A	0.8775	not_sig	0.0306444	0.00503259	0.0232562	0.00464429	0.279315	not_sig	0.0350929	0.00578244	0.0247555	0.00499544	0.174927	not_sig
nonHDL	10	115786233	G	A	0.4435	not_sig	-0.0196377	0.00511192	-0.0192167	0.00467468	0.951411	not_sig	-0.0231108	0.00581332	-0.0194389	0.00498187	0.630563	not_sig
LDL	10	115798268	TAA	T	0.9157	not_sig	-0.0159871	0.00486216	-0.0184497	0.00440734	0.706694	not_sig	-0.0189469	0.00554302	-0.0189406	0.00469998	0.999303	not_sig
logTG	10	115805056	G	C	0.9017	not_sig	-0.0154454	0.00373341	-0.0139106	0.0034098	0.760838	not_sig	-0.0178415	0.00427218	-0.0138105	0.00365936	0.472407	not_sig
LDL	10	118397894	A	G	0.4099	not_sig	0.0135216	0.00325321	0.0119259	0.00295642	0.715862	not_sig	0.018514	0.00370885	0.0109902	0.00315136	0.121108	not_sig
TC	10	118397894	A	G	0.4053	not_sig	0.0102188	0.00326398	0.00944368	0.0029829	0.860458	not_sig	0.0162635	0.00370712	0.00861116	0.00317085	0.115722	not_sig
nonHDL	10	118398046	C	A	0.7183	not_sig	0.0133458	0.00339927	0.011896	0.00311843	0.752634	not_sig	0.0188994	0.00386785	0.0111113	0.00332201	0.125601	not_sig
HDL	10	118407116	T	A	0.951	not_sig	-0.0104039	0.00338843	-0.00613651	0.00313472	0.35391	not_sig	-0.0108973	0.00389594	-0.00677378	0.00336878	0.422076	not_sig
logTG	10	120493295	G	A	0.3347	not_sig	0.00958886	0.00341115	0.00563138	0.00312291	0.390847	not_sig	0.00838404	0.00390481	0.00707362	0.00335612	0.798565	not_sig
TC	10	121582556	T	C	0.5941	not_sig	-0.00672803	0.00342617	-0.00385322	0.00312498	0.534169	not_sig	-0.00883316	0.00389567	-0.00532373	0.00332275	0.491903	not_sig
HDL	10	121641900	G	A	0.05074	not_sig	0.00995766	0.00341393	0.00306279	0.00315212	0.136758	not_sig	0.0143385	0.00392495	0.00328349	0.00338934	0.0325458	not_sig
TC	10	122853958	T	G	0.451	not_sig	-0.0125071	0.00576083	-0.00853127	0.005293	0.610317	not_sig	-0.0142678	0.00653825	-0.0134543	0.00562672	0.924659	not_sig
HDL	10	122929493	T	C	0.2051	not_sig	-0.0400289	0.0114514	-0.0181568	0.0105964	0.15979	not_sig	-0.0395878	0.0131027	-0.0159677	0.0113655	0.172089	not_sig
logTG	10	122929493	T	C	0.6561	not_sig	0.0397487	0.011218	0.0125169	0.010235	0.072138	not_sig	0.0353723	0.0127881	0.0171957	0.0109622	0.279205	not_sig
LDL	10	124693587	G	T	0.5881	not_sig	0.0155057	0.00328934	0.0145209	0.00299152	0.824226	not_sig	0.0206365	0.00374966	0.01429	0.00318696	0.195934	not_sig
nonHDL	10	124693587	G	T	0.8196	not_sig	0.0152202	0.00343681	0.013413	0.00315341	0.697622	not_sig	0.0196562	0.00390723	0.0130475	0.00335782	0.198335	not_sig
TC	10	124693587	G	T	0.8538	not_sig	0.0156983	0.00330029	0.0154421	0.00301825	0.954208	not_sig	0.0217299	0.00374807	0.0158186	0.00320646	0.229462	not_sig
HDL	10	126733319	A	G	0.007756	not_sig	-0.00870244	0.00371118	-0.00789168	0.00343792	0.872321	not_sig	-0.00684121	0.0042664	-0.00714441	0.003696	0.957044	not_sig
logTG	10	134459388	A	G	0.8079	not_sig	0.0083294	0.0039375	0.0101603	0.00358888	0.730391	not_sig	0.00788339	0.00451282	0.0080524	0.003856	0.977223	not_sig
logTG	10	135436812	CGCTTTCCTCTCT	C	0.6424	not_sig	0.0338579	0.0106678	0.0222932	0.00959141	0.418875	not_sig	0.0321326	0.0122129	0.0249688	0.0102719	0.652616	not_sig
logTG	11	380315	C	T	0.08634	not_sig	0.0248128	0.00861168	0.0316428	0.00792108	0.558312	not_sig	0.0252523	0.00983165	0.0346464	0.00850657	0.468723	not_sig
HDL	11	823586	C	G	0.09698	not_sig	-0.0310671	0.0142627	-0.0667115	0.013113	0.0650594	not_sig	-0.0265895	0.0164124	-0.0629553	0.0142052	0.0929616	not_sig
LDL	11	1081287	G	A	0.05236	not_sig	-0.0380425	0.0091649	-0.00990349	0.00839096	0.0231584	not_sig	-0.0296299	0.0103652	-0.0122879	0.0089478	0.204097	not_sig
HDL	11	2936657	G	A	0.4358	not_sig	0.0273213	0.00578504	0.0245919	0.00534816	0.728292	not_sig	0.0267842	0.00662984	0.0240411	0.00574469	0.753863	not_sig
TC	11	2942593	G	A	0.3839	not_sig	0.0211297	0.00566759	0.0255411	0.0051706	0.564205	not_sig	0.0221893	0.00641764	0.0273374	0.00549154	0.54108	not_sig
LDL	11	4993424	T	A	0.685	not_sig	-0.107269	0.0765266	-0.0339555	0.0666604	0.468841	not_sig	-0.148073	0.0889834	-0.0723922	0.0704758	0.503795	not_sig
nonHDL	11	4993424	T	A	0.2906	not_sig	-0.115355	0.0796255	-0.0531148	0.0697156	0.555376	not_sig	-0.122702	0.0924433	-0.0881707	0.0737666	0.769698	not_sig
TC	11	5248004	G	A	0.1458	not_sig	0.0102326	0.165164	-0.100327	0.14746	0.616571	not_sig	-0.00565484	0.187073	-0.0148807	0.160085	0.970028	not_sig
LDL	11	5701074	C	A	0.004937	not_sig	0.0286567	0.00635	0.0426737	0.00579483	0.102042	not_sig	0.0345761	0.00728382	0.0456	0.00620652	0.25	not_sig
nonHDL	11	5701074	C	A	0.2731	not_sig	0.0287631	0.0066285	0.0412894	0.00609766	0.163121	not_sig	0.0335662	0.00757412	0.0452751	0.00652704	0.240281	not_sig
TC	11	6092869	G	A	0.2037	not_sig	-0.000573021	0.0245592	0.022254	0.0222392	0.489643	not_sig	-0.02606	0.0277927	0.0181179	0.0235239	0.223749	not_sig
HDL	11	10381766	A	T	0.4217	not_sig	-0.0150899	0.00371499	-0.0116443	0.00342871	0.494326	not_sig	-0.015506	0.00427257	-0.0105302	0.00368828	0.376703	not_sig
logTG	11	10665235	C	T	0.8625	not_sig	-0.0122526	0.0036148	-0.0128405	0.00329618	0.904074	not_sig	-0.0150022	0.0041301	-0.0121454	0.00353966	0.598432	not_sig
TC	11	12071547	A	G	0.002278	not_sig	0.0035591	0.00379336	0.0144438	0.00346176	0.033555	not_sig	0.00447826	0.00431758	0.0147221	0.00368271	0.0702807	not_sig
nonHDL	11	12071855	A	G	0.1303	not_sig	0.00444281	0.00385065	0.0122729	0.00351545	0.132094	not_sig	0.0047353	0.00438789	0.0142652	0.00374824	0.0977371	not_sig
HDL	11	13355770	C	T	0.8139	not_sig	-0.00574733	0.00347979	-0.00469809	0.00322123	0.824402	not_sig	-0.00857576	0.00400093	-0.00518711	0.00346635	0.520943	not_sig
logTG	11	13361524	C	T	0.007094	not_sig	0.0137339	0.00353397	0.0178014	0.00323167	0.394361	not_sig	0.0175693	0.00404604	0.0202977	0.00347275	0.607865	not_sig
logTG	11	13970901	G	T	0.2703	not_sig	-0.0287537	0.00878942	-0.0168766	0.00795384	0.315032	not_sig	-0.0271976	0.0100453	-0.0147923	0.00850762	0.34468	not_sig
HDL	11	14012524	T	C	0.8591	not_sig	0.00882767	0.00335704	0.00805802	0.00310143	0.865901	not_sig	0.00736634	0.00386069	0.00734342	0.00333317	0.996405	not_sig
HDL	11	14865399	C	T	8.36e-05	sig	0.233	0.0567506	0.467238	0.0512367	0.00211535	not_sig	0.233886	0.0634201	0.452667	0.0540402	0.0084644	not_sig
logTG	11	14865399	C	T	0.001213	not_sig	-0.268138	0.0557686	-0.469931	0.0495395	0.00667415	not_sig	-0.277701	0.0625814	-0.433	0.0524074	0.057	not_sig
nonHDL	11	14865399	C	T	0.5194	not_sig	-0.169579	0.0576405	-0.281417	0.0515659	0.147047	not_sig	-0.159756	0.0637541	-0.28911	0.0538877	0.120226	not_sig
TC	11	17299762	A	G	0.2628	not_sig	0.00884916	0.00329938	0.00554931	0.0030116	0.458855	not_sig	0.00740613	0.00374225	0.00844921	0.00319901	0.831754	not_sig
nonHDL	11	18643559	G	A	0.3608	not_sig	0.0167059	0.00388567	0.014931	0.00356674	0.735796	not_sig	0.0216764	0.00441725	0.0153161	0.0037979	0.273597	not_sig
TC	11	18643559	G	A	0.4504	not_sig	0.0171216	0.0037296	0.017978	0.00341275	0.865113	not_sig	0.0223393	0.004236	0.0181168	0.00362575	0.447641	not_sig
LDL	11	18645668	T	C	0.753	not_sig	0.017218	0.00371721	0.0146533	0.00338273	0.608872	not_sig	0.0208623	0.00423794	0.0144713	0.00360397	0.249342	not_sig
logTG	11	26197972	A	T	0.3033	not_sig	0.0161075	0.00660145	0.0193454	0.00608442	0.717609	not_sig	0.0118678	0.00759079	0.018064	0.00655066	0.535469	not_sig
logTG	11	27675712	C	T	0.1084	not_sig	-0.0108024	0.00349059	-0.0124633	0.00318764	0.724586	not_sig	-0.0128293	0.00399165	-0.0135034	0.00342113	0.897692	not_sig
HDL	11	27690399	C	T	0.8183	not_sig	0.0169886	0.00355098	0.0119405	0.0032848	0.295349	not_sig	0.018798	0.00407667	0.012937	0.00353179	0.275882	not_sig
HDL	11	29200527	T	C	0.3166	not_sig	0.0123407	0.00471433	0.00275493	0.0043707	0.134856	not_sig	0.014393	0.00541125	0.00203223	0.00469726	0.083673	not_sig
logTG	11	30402714	G	A	0.357	not_sig	-0.0170031	0.00555565	-0.00551118	0.00510246	0.126587	not_sig	-0.016801	0.00635001	-0.0082488	0.00547362	0.306345	not_sig
HDL	11	32470828	C	T	0.6712	not_sig	-0.00953946	0.00340774	-0.00621053	0.00315313	0.472136	not_sig	-0.00654502	0.00392151	-0.00492713	0.00339271	0.754383	not_sig
HDL	11	36328427	T	TA	0.018	not_sig	0.00575056	0.00353289	0.0101009	0.00327298	0.365031	not_sig	0.00396714	0.00406016	0.00920957	0.00351724	0.327773	not_sig
HDL	11	45913607	G	A	0.9731	not_sig	0.0258741	0.00697176	0.0242	0.00642623	0.859466	not_sig	0.039769	0.00800289	0.0243972	0.00689807	0.144589	not_sig
TC	11	46241757	C	T	0.6069	not_sig	-0.0268976	0.00945823	-0.0214197	0.00868474	0.668808	not_sig	-0.0390411	0.0107363	-0.0244758	0.00922909	0.302256	not_sig
nonHDL	11	46349696	G	T	0.4879	not_sig	-0.0689385	0.0165173	-0.0171507	0.0152574	0.0209147	not_sig	-0.067686	0.0185939	-0.0214302	0.0162696	0.0604712	not_sig
logTG	11	47272579	A	G	0.3212	not_sig	-0.0255335	0.00355397	-0.0157531	0.00324734	0.0416269	not_sig	-0.0253948	0.00406263	-0.0163786	0.00348382	0.0911597	not_sig
HDL	11	47278917	C	T	0.03748	not_sig	0.0365816	0.00363532	0.0268773	0.00335862	0.0492792	not_sig	0.040672	0.004174	0.0277014	0.00360851	0.0184106	not_sig
LDL	11	47974373	A	C	0.4735	not_sig	-0.00526628	0.00343873	-0.00561288	0.00312321	0.940359	not_sig	-0.00824112	0.00391839	-0.00497458	0.00332805	0.524036	not_sig
TC	11	48021778	A	G	0.1744	not_sig	0.0151612	0.00375303	0.0169864	0.00342566	0.7187	not_sig	0.0215745	0.00426529	0.015688	0.00364157	0.292576	not_sig
logTG	11	56119093	T	C	0.4215	not_sig	-0.0155025	0.00693563	-0.0142496	0.00630224	0.89335	not_sig	-0.00918587	0.00792751	-0.0141331	0.00676484	0.634063	not_sig
TC	11	56225592	G	A	0.1803	not_sig	0.0214508	0.00801775	0.0126102	0.00732528	0.414331	not_sig	0.0319287	0.00911312	0.0164128	0.00778299	0.194204	not_sig
HDL	11	56652022	G	A	0.2219	not_sig	0.0233777	0.00683803	0.0129558	0.00629129	0.260705	not_sig	0.0327821	0.00787554	0.0163847	0.00675784	0.113096	not_sig
logTG	11	57119156	T	C	0.6528	not_sig	0.0139156	0.0047059	0.011033	0.00431537	0.650755	not_sig	0.012528	0.00539691	0.0113878	0.00463833	0.872354	not_sig
HDL	11	58162382	G	A	0.07226	not_sig	0.0112728	0.00611378	0.011463	0.00567726	0.981755	not_sig	0.0159319	0.00700099	0.0095066	0.00609201	0.487519	not_sig
TC	11	60152584	G	A	0.5231	not_sig	-0.0117935	0.00353617	-0.00818425	0.00322844	0.449727	not_sig	-0.0116688	0.00401543	-0.00671133	0.00343046	0.346565	not_sig
HDL	11	61588305	A	G	0.7005	not_sig	-0.0486016	0.00350542	-0.0533119	0.00324083	0.322472	not_sig	-0.0498983	0.00402922	-0.0577832	0.0034827	0.13765	not_sig
LDL	11	61588305	A	G	0.02103	not_sig	-0.0288057	0.00340958	-0.0356339	0.00309613	0.137095	not_sig	-0.0417167	0.00388826	-0.0429	0.00329886	0.82	not_sig
logTG	11	61588305	A	G	0.3183	not_sig	0.0454677	0.00342889	0.0412895	0.00313265	0.366997	not_sig	0.0403024	0.00392313	0.0384276	0.00336137	0.715935	not_sig
nonHDL	11	61588305	A	G	0.0001329	not_sig	-0.0224513	0.00356062	-0.0313013	0.00326202	0.0660972	not_sig	-0.0338206	0.00405066	-0.0381	0.00347325	0.424	not_sig
TC	11	61588305	A	G	1.13e-07	sig	-0.0361	0.00342093	-0.05029	0.00312373	0.00216078	not_sig	-0.04807	0.00388661	-0.0588	0.00331897	0.0356	not_sig
logTG	11	62378221	A	G	0.0002594	not_sig	0.00467481	0.00337517	0.0187918	0.00309179	0.00198321	not_sig	0.00235993	0.00386602	0.0191696	0.00332001	0.000940667	not_sig
LDL	11	63615561	T	C	0.2437	not_sig	-0.00967888	0.00335753	-0.00997244	0.00305093	0.948264	not_sig	-0.00976925	0.00383593	-0.0098012	0.00325516	0.994919	not_sig
TC	11	63659778	C	T	0.3974	not_sig	-0.00650517	0.00335647	-0.00816158	0.00306692	0.714868	not_sig	-0.00762405	0.00382156	-0.00812474	0.0032627	0.920411	not_sig
nonHDL	11	63669411	G	A	0.5609	not_sig	-0.00889228	0.00341912	-0.00836975	0.00313557	0.910073	not_sig	-0.00963305	0.00389137	-0.00861908	0.00334163	0.842867	not_sig
HDL	11	64004723	G	C	0.5579	not_sig	-0.0458228	0.00816113	-0.0504252	0.00746712	0.676517	not_sig	-0.0524774	0.00942968	-0.0501624	0.00809116	0.851797	not_sig
logTG	11	64004723	G	C	0.3647	not_sig	0.0494846	0.00796836	0.0569587	0.00721486	0.485656	not_sig	0.0529184	0.00917202	0.0588873	0.00780067	0.619124	not_sig
TC	11	64162955	G	A	0.6284	not_sig	-0.0177378	0.00851575	-0.0171201	0.00786574	0.95739	not_sig	-0.0233833	0.0096677	-0.0185305	0.00831614	0.702764	not_sig
TC	11	65351074	G	A	0.5516	not_sig	0.00851858	0.00361865	0.00835127	0.00330844	0.972703	not_sig	0.00774602	0.00410911	0.00786203	0.00351491	0.982837	not_sig
HDL	11	65405600	G	T	0.2962	not_sig	0.0184066	0.00413341	0.0118739	0.00382805	0.244914	not_sig	0.0185366	0.00473976	0.0105997	0.00411504	0.204815	not_sig
logTG	11	65473798	C	A	0.3706	not_sig	0.0147625	0.0036128	0.0135725	0.00330306	0.807407	not_sig	0.0141987	0.00412611	0.0136108	0.00354319	0.913679	not_sig
LDL	11	65570517	C	T	0.6635	not_sig	0.00918032	0.00554462	0.0109559	0.00505538	0.812423	not_sig	0.0117855	0.00630904	0.0116492	0.00539042	0.986854	not_sig
HDL	11	66066993	G	T	0.7101	not_sig	0.0124156	0.00340467	0.0118498	0.00315091	0.902653	not_sig	0.0138189	0.00391009	0.012869	0.0033869	0.853909	not_sig
TC	11	66272976	C	A	0.1704	not_sig	-0.0125446	0.00381261	-0.0133056	0.00349496	0.882711	not_sig	-0.0172211	0.00433525	-0.0130592	0.00371237	0.464665	not_sig
nonHDL	11	66288123	T	C	0.01236	not_sig	-0.0134295	0.00396706	-0.0156755	0.003651	0.676138	not_sig	-0.0177953	0.00451624	-0.0152869	0.00388735	0.672949	not_sig
LDL	11	66302743	C	T	0.01515	not_sig	-0.0120728	0.00380504	-0.0155597	0.0034678	0.49703	not_sig	-0.0175077	0.00434227	-0.0156108	0.00369383	0.73864	not_sig
HDL	11	67372946	G	A	0.02662	not_sig	0.00596295	0.00376383	0.0091725	0.00347956	0.530075	not_sig	0.00787211	0.00432727	0.00952822	0.00374266	0.771615	not_sig
HDL	11	68597886	G	T	0.0371	not_sig	-0.0123184	0.00362242	-0.0170508	0.00334357	0.335728	not_sig	-0.0138306	0.00416359	-0.0182007	0.00359483	0.42566	not_sig
logTG	11	68613864	C	T	0.8935	not_sig	-0.007936	0.00329144	-0.0124897	0.00300384	0.305485	not_sig	-0.00669925	0.00376831	-0.0123887	0.0032267	0.250154	not_sig
logTG	11	69305417	A	G	0.3414	not_sig	0.00690541	0.00326977	0.00638354	0.00299951	0.906115	not_sig	0.00652546	0.0037414	0.00686483	0.00321937	0.945033	not_sig
HDL	11	75455309	A	G	0.0001066	not_sig	-0.02558	0.00461151	-0.0304504	0.00425419	0.436319	not_sig	-0.0312286	0.00529918	-0.0328	0.00457135	0.817	not_sig
TC	11	75474195	C	A	0.3957	not_sig	-0.0266433	0.00563169	-0.0233151	0.00513546	0.661463	not_sig	-0.0241325	0.00639327	-0.0230437	0.00545556	0.89664	not_sig
HDL	11	76156973	G	A	0.4786	not_sig	0.0112482	0.00359296	0.00877963	0.00332332	0.613016	not_sig	0.0107436	0.00412643	0.0089175	0.0035723	0.737253	not_sig
HDL	11	77198233	T	C	0.5338	not_sig	-0.0132023	0.00389938	-0.0086235	0.00362075	0.38821	not_sig	-0.0154216	0.00447941	-0.0088236	0.00389255	0.264899	not_sig
logTG	11	78072383	T	C	0.02672	not_sig	-0.0168626	0.00447495	-0.0101417	0.00408298	0.265902	not_sig	-0.0184946	0.00512427	-0.00936544	0.00437937	0.174447	not_sig
TC	11	78072875	A	T	0.3537	not_sig	-0.0128745	0.00447253	-0.0133392	0.00407943	0.938644	not_sig	-0.0117912	0.00508578	-0.0139475	0.004333	0.746225	not_sig
TC	11	95298828	T	A	0.5631	not_sig	-0.0017229	0.00418055	-0.0100814	0.00383024	0.139334	not_sig	-0.00314022	0.0047453	-0.0113427	0.00407585	0.188554	not_sig
HDL	11	95311260	T	G	0.4135	not_sig	-0.0185828	0.0042726	-0.0135828	0.00396742	0.389832	not_sig	-0.0214175	0.00490611	-0.0125081	0.00426959	0.169547	not_sig
nonHDL	11	103870621	ATCTTG	A	0.1044	not_sig	-0.0207723	0.0043385	-0.0130277	0.00397384	0.186838	not_sig	-0.0248182	0.00492811	-0.0139092	0.00422885	0.0920784	not_sig
LDL	11	103870755	G	C	0.8468	not_sig	-0.0214623	0.00413959	-0.0121943	0.0037574	0.0964361	not_sig	-0.0253453	0.00471485	-0.01279	0.00400252	0.0417867	not_sig
TC	11	103870755	G	C	0.8012	not_sig	-0.0224492	0.00415368	-0.0158375	0.00379094	0.238411	not_sig	-0.0262099	0.00471289	-0.017002	0.0040269	0.136362	not_sig
HDL	11	103873662	A	C	0.5261	not_sig	-0.0112231	0.00466167	-0.0109682	0.00431991	0.967922	not_sig	-0.0100406	0.00534888	-0.0120331	0.00464152	0.777858	not_sig
TC	11	109957826	G	A	0.8104	not_sig	-0.00612179	0.00326809	-0.0011408	0.00298412	0.259055	not_sig	-0.00442266	0.00371407	-0.00133452	0.00317296	0.526132	not_sig
HDL	11	109966513	A	C	0.5693	not_sig	-0.0142054	0.00364998	-0.012371	0.00338534	0.711752	not_sig	-0.0132485	0.00419187	-0.0120975	0.0036399	0.835308	not_sig
logTG	11	111623694	A	AAAAC	0.0007421	not_sig	-0.007272	0.00348881	-0.0187615	0.00318966	0.014798	not_sig	-0.00916274	0.00399521	-0.0194	0.00342655	0.0509	not_sig
HDL	11	111861156	C	T	0.05898	not_sig	0.00680839	0.00345535	0.00781329	0.00319573	0.830469	not_sig	0.00809227	0.003966	0.00722392	0.00343718	0.868225	not_sig
logTG	11	113579598	C	T	0.8971	not_sig	-0.00513054	0.00756594	-0.0153258	0.00695071	0.319696	not_sig	-0.00460204	0.00865951	-0.0190806	0.00744839	0.203703	not_sig
logTG	11	114850006	C	T	0.8208	not_sig	0.00270493	0.00342877	0.00312443	0.00313384	0.927843	not_sig	0.00375602	0.00393165	0.00473597	0.00336518	0.849405	not_sig
HDL	11	116014665	C	T	0.0776	not_sig	0.00266756	0.129716	0.0734747	0.126192	0.6948	not_sig	0.108566	0.151966	0.0657342	0.131253	0.830633	not_sig
logTG	11	116139965	C	T	0.5566	not_sig	0.0439757	0.0117567	0.0197673	0.0107455	0.127478	not_sig	0.0463887	0.0134583	0.017597	0.011538	0.103392	not_sig
HDL	11	116648917	G	C	7.44e-13	sig	0.0997	0.00494005	0.0723067	0.00455173	4.27e-05	sig	0.112485	0.00576649	0.0689104	0.00493986	8.69e-09	sig
LDL	11	116648917	G	C	3.23e-18	sig	-0.058	0.00480186	-0.0826102	0.0043486	0.000138862	not_sig	-0.0611995	0.00556412	-0.088	0.00468004	0.000219	not_sig
logTG	11	116648917	G	C	1.46e-06	sig	-0.211	0.00482947	-0.188701	0.0043997	0.00049978	not_sig	-0.224612	0.00561391	-0.194607	0.00476851	4.41e-05	sig
nonHDL	11	116648917	G	C	0.06882	not_sig	-0.102953	0.00501805	-0.110458	0.00458131	0.268088	not_sig	-0.113448	0.00579733	-0.117221	0.00492618	0.618987	not_sig
TC	11	116648917	G	C	0.006274	not_sig	-0.0690574	0.0048164	-0.0815654	0.00438719	0.054206	not_sig	-0.0763598	0.0055599	-0.0896	0.0047083	0.0683	not_sig
HDL	11	117220429	A	C	0.004733	not_sig	0.7332	0.0474073	0.616423	0.0456979	0.0753371	not_sig	0.72062	0.0522329	0.645997	0.0485272	0.293917	not_sig
LDL	11	117220429	A	C	0.07118	not_sig	-0.280261	0.0456659	-0.197966	0.0439486	0.19289	not_sig	-0.264028	0.0502583	-0.198688	0.046237	0.33734	not_sig
logTG	11	117220429	A	C	0.002664	not_sig	-1.0161	0.0459456	-0.901143	0.0444089	0.0712255	not_sig	-1.01472	0.0507323	-0.928235	0.0470432	0.210041	not_sig
logTG	11	117849058	C	G	0.9572	not_sig	0.0357242	0.0988131	-0.0146821	0.0900283	0.705338	not_sig	0.0930885	0.112875	-0.0467688	0.0972068	0.346471	not_sig
HDL	11	118122491	T	C	0.9553	not_sig	-0.0508735	0.057924	-0.0487372	0.0558747	0.978764	not_sig	-0.0626559	0.0676607	-0.0748904	0.0587214	0.891079	not_sig
LDL	11	118449370	A	G	0.3541	not_sig	0.0180891	0.0049238	0.00520392	0.00448539	0.05239	not_sig	0.0193752	0.00563091	0.00453233	0.00478435	0.0439791	not_sig
TC	11	118449396	G	A	0.6333	not_sig	0.0190435	0.00493275	0.00786211	0.00451761	0.0936842	not_sig	0.0207939	0.00562044	0.00644268	0.00480486	0.0516337	not_sig
nonHDL	11	118449746	C	T	0.4046	not_sig	0.0153349	0.00513589	0.00520367	0.00471444	0.14505	not_sig	0.016203	0.00585587	0.00365856	0.00502467	0.103056	not_sig
HDL	11	118928249	G	A	0.8106	not_sig	-0.0155395	0.00342196	-0.0152794	0.00317682	0.955444	not_sig	-0.0112336	0.00393768	-0.0160946	0.00341674	0.349802	not_sig
TC	11	118980039	C	T	0.9012	not_sig	-0.0106345	0.00337477	-0.00699872	0.00308358	0.425139	not_sig	-0.0146491	0.00383555	-0.00650513	0.0032773	0.105511	not_sig
logTG	11	119834755	G	T	0.6305	not_sig	0.00616205	0.0703422	0.0333441	0.0611083	0.769886	not_sig	-0.00269392	0.0823762	0.0433245	0.0644183	0.659034	not_sig
logTG	11	120559994	C	A	0.003229	not_sig	-0.0987014	0.085762	0.0327073	0.0770637	0.253093	not_sig	-0.084591	0.0971364	0.063698	0.0815777	0.241104	not_sig
LDL	11	121330087	A	G	0.5172	not_sig	0.00730727	0.0032974	0.0120532	0.0029916	0.285105	not_sig	0.0076697	0.00376592	0.0109161	0.00319167	0.50961	not_sig
HDL	11	121801129	T	C	0.06796	not_sig	-0.0099758	0.00342413	-0.0150884	0.00316638	0.271648	not_sig	-0.00946074	0.00393867	-0.0164744	0.00340489	0.176751	not_sig
HDL	11	122517803	A	G	0.05471	not_sig	0.0276073	0.00343291	0.0167661	0.00318201	0.0202047	not_sig	0.0326774	0.0039444	0.0202603	0.00342205	0.0171058	not_sig
LDL	11	122523596	G	A	0.1425	not_sig	0.0166455	0.003349	0.0124837	0.00305098	0.356947	not_sig	0.0165113	0.00381963	0.0118586	0.00325331	0.352442	not_sig
TC	11	122523596	G	A	0.2286	not_sig	0.0221105	0.00336036	0.01847	0.0030783	0.423095	not_sig	0.0246784	0.00381821	0.0193536	0.00327341	0.288391	not_sig
nonHDL	11	122527120	G	A	0.88	not_sig	0.0147464	0.00351786	0.0129108	0.00322966	0.699906	not_sig	0.0154976	0.004001	0.0131949	0.00344204	0.661757	not_sig
HDL	11	126225876	C	G	0.9814	not_sig	-0.0317813	0.00643821	-0.0288741	0.00598945	0.740247	not_sig	-0.0305712	0.00745201	-0.0277957	0.00645206	0.777672	not_sig
LDL	11	126225876	C	G	0.6096	not_sig	0.069975	0.00627132	0.0491612	0.00572528	0.0139764	not_sig	0.0695119	0.00720049	0.0517165	0.00611901	0.0589703	not_sig
nonHDL	11	126225876	C	G	0.07147	not_sig	0.0642444	0.00654007	0.045639	0.00602828	0.0359419	not_sig	0.0657096	0.00749226	0.0479418	0.00643426	0.071223	not_sig
TC	11	126238633	T	C	0.003095	not_sig	0.0413403	0.00482008	0.021471	0.00438605	0.0022333	not_sig	0.0403417	0.00549356	0.0221347	0.00466822	0.0113257	not_sig
logTG	12	508859	G	T	0.4736	not_sig	-0.00905295	0.00371295	-0.00915342	0.00339576	0.984025	not_sig	-0.0118741	0.0042489	-0.00987105	0.00364809	0.719846	not_sig
LDL	12	623129	A	G	0.1356	not_sig	0.0162308	0.00369346	0.0141678	0.00336041	0.678653	not_sig	0.0177376	0.00421708	0.0181813	0.00358327	0.935915	not_sig
nonHDL	12	623129	A	G	0.2247	not_sig	0.017575	0.00386086	0.0125192	0.00354615	0.333489	not_sig	0.0189892	0.0043974	0.0164971	0.00377907	0.666468	not_sig
TC	12	623129	A	G	0.008159	not_sig	0.0145444	0.00370558	0.0139838	0.00339049	0.910878	not_sig	0.0160768	0.00421515	0.0177575	0.00360533	0.761237	not_sig
HDL	12	2908330	C	A	0.9109	not_sig	0.0262437	0.00954651	0.0298348	0.00885646	0.782135	not_sig	0.0225176	0.0109272	0.0319135	0.00952123	0.515643	not_sig
LDL	12	4384844	T	G	0.47	not_sig	-0.0501164	0.0126111	-0.0703415	0.0114106	0.233062	not_sig	-0.0742208	0.0141833	-0.0693774	0.0120555	0.794166	not_sig
logTG	12	4384844	T	G	0.000173	not_sig	-0.0951922	0.0126773	-0.0815473	0.0115397	0.42478	not_sig	-0.0980758	0.0143004	-0.0730436	0.012279	0.182956	not_sig
nonHDL	12	4384844	T	G	0.6892	not_sig	-0.0653583	0.0131831	-0.0745967	0.0120275	0.603673	not_sig	-0.0922888	0.0147651	-0.0756946	0.0126795	0.39256	not_sig
TC	12	4384844	T	G	0.1548	not_sig	-0.0596674	0.0126504	-0.0716071	0.011511	0.48392	not_sig	-0.0915871	0.0141717	-0.077538	0.0121287	0.450105	not_sig
HDL	12	4388084	C	G	0.7239	not_sig	0.0100982	0.00340362	0.00463977	0.0031543	0.238194	not_sig	0.011556	0.00391083	0.00506855	0.00339223	0.208912	not_sig
HDL	12	6713450	A	G	0.8888	not_sig	-0.017781	0.00437536	-0.0216202	0.0040432	0.51814	not_sig	-0.0213644	0.00503102	-0.0232066	0.00435026	0.781215	not_sig
logTG	12	6739497	T	C	0.3652	not_sig	-0.00713725	0.0036752	-0.0155909	0.0033651	0.0889103	not_sig	-0.0061689	0.0042113	-0.0141779	0.00361698	0.147989	not_sig
nonHDL	12	7625014	T	C	0.0965	not_sig	-0.0123207	0.00615817	-0.0235153	0.00566038	0.179571	not_sig	-0.0166112	0.00701315	-0.0235485	0.00602148	0.451709	not_sig
HDL	12	7681181	T	G	0.1379	not_sig	-0.0169499	0.00496462	-0.0117172	0.00459343	0.437873	not_sig	-0.0216651	0.00569816	-0.0122175	0.00493892	0.208993	not_sig
HDL	12	9082581	A	G	0.4698	not_sig	-0.023403	0.00553442	-0.0277181	0.00511739	0.565931	not_sig	-0.0287622	0.00635662	-0.0303944	0.00549751	0.84559	not_sig
LDL	12	9082581	A	G	0.2386	not_sig	-0.0273	0.00537039	-0.0212033	0.00488817	0.399857	not_sig	-0.028975	0.00611961	-0.0207126	0.00520617	0.302459	not_sig
nonHDL	12	9082581	A	G	0.0979	not_sig	-0.0260314	0.00562172	-0.0214379	0.00515093	0.545758	not_sig	-0.025617	0.00639065	-0.0204871	0.00548271	0.54126	not_sig
TC	12	9082581	A	G	0.5417	not_sig	-0.033404	0.00538706	-0.0293765	0.0049314	0.580277	not_sig	-0.0358601	0.00611673	-0.0294097	0.00523798	0.421867	not_sig
HDL	12	13345397	T	G	0.5716	not_sig	0.00918588	0.00493044	0.0102158	0.00456934	0.877897	not_sig	0.00914662	0.00566535	0.0105	0.00490961	0.856344	not_sig
HDL	12	16503789	T	G	0.7868	not_sig	-0.183352	0.303788	-0.33284	0.321638	0.734744	not_sig	-0.175754	0.314718	-0.383055	0.324912	0.645834	not_sig
logTG	12	20470199	A	G	0.1093	not_sig	-0.0206975	0.00412416	-0.0271271	0.00377677	0.248944	not_sig	-0.0226959	0.00471524	-0.0253888	0.00405052	0.664002	not_sig
HDL	12	20470221	A	C	0.4889	not_sig	0.030804	0.00421911	0.0292205	0.00390505	0.782393	not_sig	0.0321849	0.00484679	0.0270524	0.00419385	0.421987	not_sig
logTG	12	21343833	A	C	0.05743	not_sig	0.0325578	0.00457122	0.0196987	0.0041969	0.0377182	not_sig	0.0292497	0.00522864	0.0187916	0.00450535	0.128663	not_sig
logTG	12	22747967	T	G	0.8747	not_sig	-0.0129759	0.0038568	-0.00730359	0.00353261	0.276792	not_sig	-0.0124501	0.00441296	-0.00829739	0.0037904	0.474101	not_sig
nonHDL	12	25408464	A	G	0.1435	not_sig	-0.0172024	0.00616069	-0.0234844	0.00563943	0.450709	not_sig	-0.0181405	0.00699675	-0.0250776	0.00599801	0.450362	not_sig
LDL	12	25409070	T	C	0.4606	not_sig	-0.018989	0.00628859	-0.0263624	0.0057194	0.384406	not_sig	-0.0220309	0.00714903	-0.0272034	0.00608433	0.580604	not_sig
logTG	12	25409070	T	C	0.266	not_sig	-0.00670086	0.00632274	-0.0211136	0.00578872	0.0918047	not_sig	-0.00119069	0.0072114	-0.0207624	0.00620196	0.0390798	not_sig
TC	12	25409070	T	C	0.03254	not_sig	-0.0192424	0.00630818	-0.0283911	0.00577101	0.28326	not_sig	-0.0213274	0.00714446	-0.0303199	0.00612203	0.337864	not_sig
HDL	12	26440698	G	A	0.2111	not_sig	0.0118554	0.00390879	0.0108863	0.00361565	0.855184	not_sig	0.00937473	0.00449746	0.00971794	0.00388988	0.953846	not_sig
logTG	12	26472562	A	G	0.002485	not_sig	-0.00686448	0.00381649	-0.016654	0.0034889	0.0576361	not_sig	-0.0047286	0.00437411	-0.0172292	0.00374828	0.0295519	not_sig
TC	12	26803949	T	C	0.2212	not_sig	0.00571884	0.00333199	0.0134312	0.00304794	0.0867866	not_sig	0.00689145	0.00378559	0.0119327	0.00324055	0.310371	not_sig
LDL	12	29491528	A	G	0.4217	not_sig	-0.00688821	0.00364661	-0.00900078	0.00330818	0.667008	not_sig	-0.0096321	0.00415591	-0.0105796	0.00352154	0.861541	not_sig
TC	12	29491528	A	G	0.9927	not_sig	-0.010915	0.00365897	-0.00974607	0.00333784	0.812911	not_sig	-0.0148205	0.00415417	-0.012243	0.00354323	0.635946	not_sig
nonHDL	12	29496991	C	T	0.3844	not_sig	-0.00794013	0.00380866	-0.0106024	0.00348846	0.60523	not_sig	-0.0112294	0.00432829	-0.0127493	0.003711	0.789217	not_sig
logTG	12	29508642	A	G	0.5214	not_sig	-0.00912284	0.00363623	-0.0109971	0.00331847	0.702619	not_sig	-0.0119157	0.00415915	-0.0131421	0.00355736	0.822214	not_sig
HDL	12	33588388	T	C	0.7459	not_sig	-0.00626504	0.00339083	-0.00545875	0.0031474	0.861266	not_sig	-0.00722995	0.00389955	-0.00558553	0.00338393	0.749445	not_sig
nonHDL	12	40565161	A	C	0.6013	not_sig	-0.0228741	0.00622227	-0.0185613	0.00568774	0.607937	not_sig	-0.0258165	0.00708869	-0.0197051	0.00607118	0.511433	not_sig
TC	12	40565161	A	C	0.5183	not_sig	-0.0201515	0.00598463	-0.0155555	0.00544944	0.569081	not_sig	-0.0237205	0.00680924	-0.0173809	0.00580547	0.477438	not_sig
LDL	12	40580318	T	C	0.8237	not_sig	0.0227347	0.00642992	0.0183233	0.0058353	0.610433	not_sig	0.025554	0.00734972	0.0203044	0.00624037	0.585094	not_sig
logTG	12	46224063	A	G	0.5079	not_sig	0.0134079	0.00401828	0.0104743	0.00367614	0.589085	not_sig	0.0145876	0.00460544	0.0116901	0.00395299	0.632139	not_sig
TC	12	46322449	C	T	0.8927	not_sig	0.0132321	0.00398379	0.00385511	0.0036441	0.0815815	not_sig	0.015655	0.00453604	0.0039071	0.00387932	0.0484188	not_sig
logTG	12	48143315	A	G	0.03109	not_sig	0.0417271	0.0154441	0.0418374	0.0142996	0.995808	not_sig	0.0361028	0.0176995	0.0372114	0.0152913	0.962091	not_sig
HDL	12	49399132	G	C	0.7077	not_sig	-0.0232732	0.00890936	-0.00904271	0.00830489	0.241355	not_sig	-0.0214171	0.010264	-0.00624376	0.0089349	0.263531	not_sig
logTG	12	49399132	G	C	0.838	not_sig	0.0237689	0.00873446	0.0113503	0.00801623	0.293533	not_sig	0.0217553	0.0100083	0.00651169	0.0086186	0.247146	not_sig
LDL	12	50127304	ATAATAT	A	0.9389	not_sig	-0.0219719	0.0142644	-0.037095	0.0129703	0.431526	not_sig	-0.0265304	0.0161479	-0.0390246	0.0137446	0.554643	not_sig
nonHDL	12	50127304	ATAATAT	A	0.7082	not_sig	-0.0224604	0.0149417	-0.0315632	0.0136232	0.651674	not_sig	-0.0254083	0.0169125	-0.036403	0.0144177	0.619838	not_sig
TC	12	50127304	ATAATAT	A	0.7541	not_sig	-0.0251438	0.014306	-0.0425357	0.0130828	0.368326	not_sig	-0.0277638	0.0161282	-0.047675	0.0138278	0.34731	not_sig
HDL	12	50263148	G	A	0.02249	not_sig	-0.0141454	0.00343503	-0.00550717	0.00318384	0.0643915	not_sig	-0.0134746	0.00394871	-0.00382422	0.00342386	0.0640894	not_sig
LDL	12	51103633	C	T	0.965	not_sig	-0.00986677	0.00341493	-0.0152711	0.00310127	0.240075	not_sig	-0.0138268	0.00389188	-0.0156688	0.0033059	0.717558	not_sig
nonHDL	12	51103633	C	T	0.9324	not_sig	-0.00970355	0.00356639	-0.0149858	0.00326941	0.273598	not_sig	-0.0137271	0.00405271	-0.0157415	0.00348219	0.705408	not_sig
TC	12	51103633	C	T	0.7957	not_sig	-0.0111561	0.00342585	-0.0181688	0.00312914	0.12962	not_sig	-0.0155319	0.00388966	-0.0184948	0.00332646	0.561584	not_sig
HDL	12	51211692	A	G	0.4183	not_sig	0.0118886	0.00340667	0.0102354	0.00313528	0.720287	not_sig	0.0157921	0.00391556	0.0111279	0.003372	0.365413	not_sig
TC	12	51779544	AG	A	0.06187	not_sig	-0.0178438	0.00343163	-0.0119549	0.00313189	0.203717	not_sig	-0.0185113	0.00389286	-0.0121517	0.00332873	0.213116	not_sig
LDL	12	51783420	T	A	0.08464	not_sig	-0.0140739	0.00329961	-0.0101181	0.00299771	0.373573	not_sig	-0.0115082	0.00376058	-0.0107623	0.00319586	0.87954	not_sig
nonHDL	12	51788340	T	C	0.3707	not_sig	-0.0144045	0.0035364	-0.00976907	0.00324649	0.332915	not_sig	-0.0157026	0.00402226	-0.0107929	0.00346266	0.353614	not_sig
LDL	12	53265945	C	T	0.6792	not_sig	0.00713807	0.00331314	0.00748421	0.00300859	0.93818	not_sig	0.0105519	0.00377959	0.00898514	0.00320799	0.75132	not_sig
TC	12	53443278	T	G	0.6178	not_sig	-0.00761495	0.00332138	-0.00254652	0.00304398	0.259269	not_sig	-0.00621911	0.00377877	-0.0035453	0.0032357	0.589925	not_sig
LDL	12	53793314	C	A	0.6086	not_sig	0.0149103	0.00426621	0.0124937	0.00387663	0.674214	not_sig	0.0175098	0.00487906	0.0117667	0.00413799	0.368027	not_sig
HDL	12	53796744	T	C	0.06409	not_sig	-0.0143915	0.00336874	-0.00859861	0.00311748	0.205658	not_sig	-0.0135244	0.00387368	-0.00708949	0.00335215	0.207808	not_sig
logTG	12	53796754	G	A	0.1344	not_sig	0.0118497	0.00328231	0.00592029	0.00300416	0.181462	not_sig	0.0120583	0.00375853	0.00427798	0.00322576	0.11522	not_sig
nonHDL	12	53801461	C	A	0.6997	not_sig	0.0161137	0.00447929	0.01196	0.00410268	0.492887	not_sig	0.0210928	0.00510889	0.0117845	0.00437681	0.165302	not_sig
HDL	12	56470625	C	T	0.5395	not_sig	-0.0112416	0.00337686	-0.0103685	0.00311767	0.848917	not_sig	-0.0100055	0.00387814	-0.00905908	0.00335204	0.853122	not_sig
logTG	12	56941146	C	A	0.329	not_sig	-0.0112575	0.00344141	-0.0110602	0.00315046	0.966177	not_sig	-0.0158805	0.00393599	-0.0110253	0.00338348	0.348245	not_sig
TC	12	57313335	T	A	0.4085	not_sig	-0.00729152	0.00338915	-0.00727246	0.00309711	0.996678	not_sig	-0.0119492	0.00384927	-0.00732273	0.00329041	0.359607	not_sig
LDL	12	57645789	T	A	0.5958	not_sig	-0.0200115	0.00405231	-0.016814	0.00366489	0.557315	not_sig	-0.0232534	0.0046085	-0.0169928	0.00390217	0.298522	not_sig
nonHDL	12	57692470	C	T	0.1404	not_sig	-0.0246255	0.00396434	-0.0190233	0.00361807	0.295245	not_sig	-0.029001	0.00450264	-0.0212634	0.00385089	0.190344	not_sig
HDL	12	57823585	A	C	0.342	not_sig	0.0237643	0.00389231	0.0275172	0.00358836	0.477176	not_sig	0.0259089	0.00446689	0.0282172	0.00385478	0.694827	not_sig
logTG	12	57823585	A	C	0.01576	not_sig	-0.0263668	0.00380662	-0.0192413	0.0034685	0.165296	not_sig	-0.0279204	0.00434931	-0.0205911	0.00372097	0.199137	not_sig
TC	12	58256010	T	C	0.4904	not_sig	0.00668688	0.00349008	0.00900983	0.00318591	0.622059	not_sig	0.00805077	0.00396689	0.0102842	0.00338643	0.667637	not_sig
logTG	12	62838230	C	T	0.9685	not_sig	-0.0133899	0.00438095	-0.0152608	0.00401698	0.752274	not_sig	-0.0158259	0.00500814	-0.0145513	0.00431027	0.846622	not_sig
logTG	12	63503447	C	T	0.1532	not_sig	-0.0056396	0.00346151	-0.00947527	0.00317407	0.412799	not_sig	-0.00550767	0.00396102	-0.00950219	0.00340635	0.443253	not_sig
logTG	12	66206798	T	C	0.4315	not_sig	0.0137589	0.0048316	0.0125241	0.00442315	0.850061	not_sig	0.0118531	0.00555336	0.0131501	0.00474745	0.85871	not_sig
TC	12	66260924	A	G	0.4554	not_sig	-0.00872676	0.00469994	-0.00697	0.00430588	0.782265	not_sig	-0.00956345	0.00536154	-0.006754	0.00457903	0.689485	not_sig
HDL	12	67689927	TA	T	0.253	not_sig	0.0024751	0.00341615	0.0127315	0.00316182	0.0271397	not_sig	-9.57e-06	0.00393	0.0135288	0.00339883	0.00893198	not_sig
logTG	12	69722880	T	C	0.5202	not_sig	-0.00538801	0.00328532	-0.00976599	0.00299877	0.323665	not_sig	-0.00711675	0.00375832	-0.00969516	0.00321782	0.601274	not_sig
HDL	12	69868820	CAT	C	0.6887	not_sig	-0.0115025	0.00353812	-0.00645535	0.003271	0.293553	not_sig	-0.00837588	0.00406569	-0.00731963	0.00351583	0.843786	not_sig
LDL	12	72179446	C	T	0.4311	not_sig	0.0485632	0.0117493	0.0550678	0.0105171	0.679142	not_sig	0.0629989	0.0135387	0.0556988	0.0112631	0.677667	not_sig
nonHDL	12	72179446	C	T	0.3621	not_sig	0.0522697	0.0122898	0.0534724	0.0110768	0.941891	not_sig	0.0671905	0.0141344	0.0541176	0.0118581	0.477389	not_sig
TC	12	72179446	C	T	0.4543	not_sig	0.0440077	0.0117915	0.0500126	0.0106061	0.704189	not_sig	0.0622397	0.0135383	0.0498106	0.0113301	0.480205	not_sig
HDL	12	89674799	T	C	0.9621	not_sig	-0.00956278	0.00362928	-0.00783017	0.0033482	0.724946	not_sig	-0.00747168	0.00417433	-0.00833592	0.00360214	0.875106	not_sig
nonHDL	12	89874816	CAGGGCCTAATTGTT	C	0.2902	not_sig	0.00868564	0.00370146	0.0114135	0.00339143	0.585838	not_sig	0.00554667	0.00421273	0.0121545	0.00361382	0.232562	not_sig
TC	12	89885473	T	C	0.6579	not_sig	0.00815675	0.00326018	0.00542602	0.00298685	0.535713	not_sig	0.00603885	0.00370834	0.00536773	0.00317671	0.890383	not_sig
LDL	12	89921860	A	T	0.06922	not_sig	0.00690301	0.00341474	0.0108088	0.00310271	0.395949	not_sig	0.00395611	0.00389879	0.0107541	0.00330833	0.182488	not_sig
LDL	12	92802078	T	C	0.0205	not_sig	0.00382098	0.00325478	0.00717971	0.00295848	0.443835	not_sig	0.00409716	0.00371041	0.00608322	0.00315479	0.682606	not_sig
TC	12	92819139	A	C	0.0275	not_sig	0.00317304	0.00326077	0.00856378	0.00298054	0.22109	not_sig	0.00358095	0.00370309	0.00803281	0.00316948	0.359745	not_sig
LDL	12	100836797	T	C	0.4388	not_sig	-0.00587361	0.00326246	-0.0103494	0.0029755	0.30942	not_sig	-0.00823834	0.00371936	-0.0116634	0.00317262	0.48235	not_sig
nonHDL	12	100836797	T	C	0.6787	not_sig	-0.00369536	0.0034095	-0.0111969	0.00313516	0.104365	not_sig	-0.00533822	0.00387674	-0.0118117	0.00334079	0.204651	not_sig
TC	12	100836797	T	C	0.4067	not_sig	-0.00505891	0.00327352	-0.0103088	0.00300199	0.235918	not_sig	-0.00744653	0.00371798	-0.0113241	0.00319204	0.427504	not_sig
HDL	12	101867997	G	A	0.7377	not_sig	0.00604844	0.00354895	0.0107981	0.00328696	0.324813	not_sig	0.00842356	0.00408416	0.0104302	0.00353543	0.709526	not_sig
LDL	12	102806305	C	T	0.9776	not_sig	-0.0081988	0.00360398	-0.00784264	0.00327348	0.941523	not_sig	-0.00665079	0.00411311	-0.0078158	0.00348826	0.828512	not_sig
TC	12	102806305	C	T	0.3891	not_sig	-0.00671047	0.00361676	-0.0067431	0.0033028	0.99467	not_sig	-0.00435315	0.00411204	-0.00757189	0.00350963	0.550493	not_sig
LDL	12	105606068	G	C	0.7226	not_sig	-0.0196585	0.00556648	-0.0163451	0.00509411	0.659702	not_sig	-0.0217993	0.00635778	-0.015162	0.00543904	0.426343	not_sig
nonHDL	12	105606068	G	C	0.3641	not_sig	-0.0223326	0.00581751	-0.0170858	0.00536157	0.506027	not_sig	-0.0246757	0.00662813	-0.0159072	0.00572112	0.315277	not_sig
TC	12	105606068	G	C	0.6379	not_sig	-0.0202177	0.00558452	-0.0149937	0.00514043	0.490093	not_sig	-0.0227937	0.00635465	-0.0140902	0.00547286	0.298033	not_sig
HDL	12	107100717	T	C	0.01777	not_sig	-0.00819734	0.00334681	-0.0125053	0.00309505	0.343313	not_sig	-0.0054303	0.00384738	-0.0107486	0.00333044	0.294631	not_sig
logTG	12	107199142	G	A	0.009863	not_sig	0.0130247	0.00376837	0.0155359	0.00345422	0.622303	not_sig	0.0135042	0.00431405	0.0160455	0.00371237	0.654343	not_sig
HDL	12	109057037	A	T	0.3809	not_sig	-0.00715277	0.0036552	-0.0111079	0.00337356	0.425247	not_sig	-0.0055349	0.00420395	-0.0105703	0.00362895	0.363254	not_sig
logTG	12	109100503	C	T	0.1041	not_sig	0.000876092	0.00341433	0.00871907	0.00311886	0.0889985	not_sig	0.000846754	0.00390682	0.0101056	0.00335023	0.0712365	not_sig
TC	12	109152649	C	T	8.66e-05	sig	0.00146	0.00358921	0.0100265	0.00327574	0.0772487	not_sig	0.00395052	0.0040811	0.0127	0.00348521	0.102	not_sig
nonHDL	12	109156737	T	C	0.0006946	not_sig	0.00322597	0.00373907	0.0142845	0.00342252	0.0286939	not_sig	0.00588899	0.00425493	0.0163795	0.00364901	0.060564	not_sig
LDL	12	109171697	T	A	0.0004646	not_sig	0.00475944	0.00354417	0.0132754	0.00321692	0.074403	not_sig	0.0065124	0.00404609	0.0150508	0.00343069	0.106529	not_sig
logTG	12	109709680	G	T	0.09125	not_sig	-0.0125801	0.00420134	-0.0140575	0.0038475	0.794826	not_sig	-0.0158103	0.00480772	-0.0149681	0.00412825	0.893982	not_sig
nonHDL	12	109876128	C	T	0.715	not_sig	0.0172275	0.00370096	0.00833268	0.00338073	0.0751752	not_sig	0.0143492	0.00422306	0.00817243	0.00360642	0.264719	not_sig
HDL	12	109920071	G	T	0.141	not_sig	0.020522	0.00334706	0.0243564	0.00309021	0.398644	not_sig	0.0219296	0.00384955	0.0247365	0.00332424	0.579995	not_sig
TC	12	109998097	A	G	0.2183	not_sig	0.0150501	0.00326405	0.0147639	0.00297777	0.948207	not_sig	0.0140111	0.00371132	0.013847	0.00316703	0.973097	not_sig
LDL	12	110000193	C	T	0.871	not_sig	0.0093815	0.00325292	0.00603418	0.0029511	0.444728	not_sig	0.00749358	0.0037128	0.00533642	0.00314736	0.656745	not_sig
HDL	12	111344621	G	T	0.0209	not_sig	0.933724	0.352302	0.0359524	0.352409	0.0708158	not_sig	1.0234	0.394166	0.386	0.385921	0.247	not_sig
logTG	12	111702646	A	G	0.5601	not_sig	-0.00877741	0.0037869	-0.0107799	0.00345588	0.695299	not_sig	-0.00902942	0.00432471	-0.00945479	0.00370843	0.940317	not_sig
HDL	12	111884608	T	C	0.8423	not_sig	0.0231019	0.00334882	0.019154	0.0030944	0.385258	not_sig	0.0274398	0.00385143	0.0206213	0.00332918	0.17926	not_sig
LDL	12	112007756	C	T	0.001114	not_sig	0.0185396	0.00325429	0.0130648	0.00295348	0.211583	not_sig	0.017463	0.0037141	0.0140953	0.00315037	0.488071	not_sig
nonHDL	12	112007756	C	T	0.006372	not_sig	0.018364	0.00340184	0.0119895	0.00311403	0.165744	not_sig	0.0153107	0.00387229	0.0122243	0.00331958	0.543989	not_sig
TC	12	112007756	C	T	0.0009282	not_sig	0.0238415	0.00326506	0.019079	0.00297965	0.279971	not_sig	0.021726	0.00371222	0.0194217	0.0031694	0.63594	not_sig
LDL	12	113218868	G	A	0.4618	not_sig	-0.00832848	0.00366644	-0.00877088	0.00333119	0.928642	not_sig	-0.00986411	0.00418493	-0.0108711	0.00355437	0.854093	not_sig
TC	12	113218868	G	A	0.5655	not_sig	-0.00925026	0.00367882	-0.0113979	0.0033611	0.665614	not_sig	-0.010993	0.00418334	-0.0120188	0.00357619	0.851738	not_sig
HDL	12	113409176	G	A	0.0005459	not_sig	0.37695	0.392217	0.590212	0.390204	0.699098	not_sig	0.288908	0.395682	0.559	0.392198	0.627	not_sig
TC	12	120859188	T	G	0.7007	not_sig	0.0129905	0.00364889	0.0107922	0.00333182	0.655514	not_sig	0.0132478	0.00415061	0.0118114	0.00354647	0.791913	not_sig
HDL	12	121406293	G	A	0.03151	not_sig	-0.0161954	0.00335267	-0.0098561	0.00309544	0.163591	not_sig	-0.0177871	0.00385769	-0.0130384	0.00332822	0.350001	not_sig
LDL	12	121416650	A	C	2.31e-06	sig	0.0234	0.00352554	0.0356496	0.00320328	0.0096509	not_sig	0.0252631	0.00403722	0.0375	0.00342144	0.0203	not_sig
TC	12	121416650	A	C	8.55e-06	sig	0.0239	0.00353705	0.035875	0.00323182	0.0124158	not_sig	0.0285963	0.00403501	0.0392	0.00344232	0.044	not_sig
nonHDL	12	121416988	A	G	2.92e-05	sig	0.02	0.00365727	0.0314578	0.00334661	0.0201859	not_sig	0.0220777	0.00417536	0.034	0.00357014	0.0295	not_sig
TC	12	122370206	T	C	0.4879	not_sig	-0.0103302	0.00494647	-0.00289137	0.00450734	0.264995	not_sig	-0.00831972	0.00562528	-0.00480829	0.00480073	0.633988	not_sig
LDL	12	122380274	A	G	0.7141	not_sig	-0.0124823	0.00493296	-0.00566111	0.00447007	0.304185	not_sig	-0.0105158	0.00563081	-0.00619826	0.00477412	0.557572	not_sig
HDL	12	122381427	C	A	0.2919	not_sig	-0.0184448	0.00678691	-0.0201203	0.00626013	0.855606	not_sig	-0.0177249	0.00778681	-0.021556	0.00672678	0.708898	not_sig
HDL	12	122963550	C	T	1.5e-06	sig	-0.0134	0.00582472	-0.0364529	0.00535608	0.00351475	not_sig	-0.0115487	0.00669622	-0.0373	0.00576336	0.00345	not_sig
logTG	12	123203258	T	G	7.44e-10	sig	-0.00759	0.00400146	-0.020825	0.00366551	0.0144581	not_sig	-0.00600345	0.00457582	-0.0221	0.00393279	0.00734	not_sig
HDL	12	123804721	G	C	5.94e-05	sig	0.0456	0.00577263	0.0187965	0.00536676	0.000660015	not_sig	0.0524185	0.00664998	0.0218717	0.00579327	0.000514508	not_sig
nonHDL	12	123825339	A	G	0.1062	not_sig	-0.0199918	0.00586529	-0.018656	0.00540248	0.8666	not_sig	-0.0246182	0.00668733	-0.0176376	0.0057781	0.428345	not_sig
TC	12	123825339	A	G	0.1185	not_sig	-0.033641	0.00563161	-0.0289925	0.00516994	0.542032	not_sig	-0.0402984	0.00641382	-0.0296623	0.00551456	0.207346	not_sig
LDL	12	123856974	G	A	0.2155	not_sig	-0.0215279	0.00561448	-0.0207879	0.00512649	0.922258	not_sig	-0.0267321	0.00641934	-0.0202164	0.00548338	0.438994	not_sig
logTG	12	123895906	G	C	0.0002966	not_sig	0.000784187	0.00367472	0.0114464	0.00335601	0.0316816	not_sig	0.00214226	0.00420827	0.0122585	0.00360787	0.0672461	not_sig
HDL	12	124409502	G	A	0.0005704	not_sig	0.0206929	0.00359803	0.0326527	0.00333029	0.0144377	not_sig	0.022421	0.00413732	0.0343	0.00357621	0.0291	not_sig
nonHDL	12	124409502	G	A	3.44e-09	sig	-0.0057	0.00365481	-0.0219105	0.00335199	0.00104788	not_sig	-0.0111206	0.00415942	-0.0225	0.00356641	0.0367	not_sig
logTG	12	124492610	T	G	3.77e-08	sig	-0.0137	0.00345746	-0.0273991	0.00316802	0.0032843	not_sig	-0.019249	0.00395938	-0.0286	0.00339768	0.0721	not_sig
LDL	12	124560456	G	T	0.04156	not_sig	0.0066234	0.0033123	0.016499	0.00300882	0.0268965	not_sig	0.00611783	0.00377598	0.0180343	0.0032074	0.0158715	not_sig
TC	12	125265201	G	A	0.1463	not_sig	-0.0115464	0.00353652	-0.0161351	0.00323114	0.33677	not_sig	-0.00935454	0.00401961	-0.0177154	0.00343588	0.112865	not_sig
LDL	12	125312425	G	C	0.2623	not_sig	0.0201397	0.00466632	0.0218057	0.00423866	0.791002	not_sig	0.0235811	0.00535224	0.0254458	0.0045269	0.789667	not_sig
logTG	12	125312425	G	C	0.4874	not_sig	0.0174298	0.00469266	0.0131611	0.00428799	0.500704	not_sig	0.0169548	0.00539985	0.0137348	0.00461229	0.649354	not_sig
nonHDL	12	125312425	G	C	0.2612	not_sig	0.0255764	0.00487819	0.0239806	0.0044652	0.808808	not_sig	0.0295856	0.00558363	0.0284348	0.00476336	0.87506	not_sig
HDL	12	125325010	C	G	0.0217	not_sig	-0.0468075	0.00509417	-0.0610506	0.00471645	0.0396545	not_sig	-0.0488823	0.00585963	-0.0624737	0.00507078	0.0786176	not_sig
LDL	12	133065832	A	G	0.3598	not_sig	0.00991774	0.00468555	0.0155209	0.00424312	0.374082	not_sig	0.00933973	0.00535874	0.0152526	0.00453414	0.398304	not_sig
TC	12	133065832	A	G	0.2873	not_sig	0.0126332	0.00470024	0.0186603	0.00428062	0.341769	not_sig	0.0138097	0.00535564	0.0199543	0.00456151	0.381115	not_sig
nonHDL	12	133140329	C	G	0.1535	not_sig	0.0144235	0.00457536	0.0195955	0.00418157	0.402745	not_sig	0.0162175	0.00521991	0.02143	0.00445844	0.446425	not_sig
logTG	13	23908034	A	G	0.05523	not_sig	-0.0035423	0.00327763	-0.0109721	0.0029996	0.0935656	not_sig	-0.00449143	0.00375221	-0.0108292	0.0032211	0.198741	not_sig
TC	13	28604007	T	C	0.5921	not_sig	-0.064321	0.0149346	-0.0749961	0.0137561	0.598046	not_sig	-0.0762207	0.0169865	-0.0728655	0.0146644	0.880821	not_sig
HDL	13	28687084	T	C	0.2532	not_sig	-0.0066407	0.00406822	-0.0137498	0.00374636	0.197391	not_sig	-0.00874707	0.00467764	-0.012968	0.00402775	0.492915	not_sig
logTG	13	29145323	A	C	0.1611	not_sig	-0.0103837	0.00343897	-0.0118311	0.00314031	0.755295	not_sig	-0.0107483	0.00393906	-0.0127387	0.00337154	0.700276	not_sig
logTG	13	31001091	AT	A	0.9861	not_sig	-0.00999536	0.00339219	-0.0147493	0.00309499	0.299202	not_sig	-0.012559	0.00387692	-0.0140749	0.00332245	0.765928	not_sig
TC	13	31005142	T	C	0.9714	not_sig	0.00618769	0.00337001	0.0098031	0.00307392	0.426721	not_sig	0.00688318	0.00382626	0.0105841	0.0032673	0.46077	not_sig
nonHDL	13	31010795	C	A	0.5321	not_sig	0.00759312	0.00353073	0.0126096	0.00323305	0.293364	not_sig	0.00838861	0.00401071	0.013423	0.00344521	0.339682	not_sig
TC	13	32444439	T	C	0.4362	not_sig	-0.00401609	0.00350169	-0.0080899	0.00318894	0.388394	not_sig	-0.00663913	0.00398112	-0.00909967	0.00338747	0.636922	not_sig
LDL	13	32445660	T	C	0.4606	not_sig	-0.00407198	0.0034902	-0.00763769	0.00316103	0.447658	not_sig	-0.00619938	0.00398325	-0.00809385	0.00336726	0.7157	not_sig
LDL	13	32976656	GC	G	0.1037	not_sig	-0.0226992	0.00331062	-0.0176216	0.00301416	0.255442	not_sig	-0.0247943	0.00377738	-0.0181109	0.00321201	0.176506	not_sig
nonHDL	13	32976656	GC	G	0.416	not_sig	-0.0209466	0.00346204	-0.016712	0.00317681	0.366136	not_sig	-0.0230164	0.0039402	-0.016599	0.00338158	0.215225	not_sig
TC	13	32976656	GC	G	0.3158	not_sig	-0.0198617	0.00332183	-0.015582	0.0030411	0.340644	not_sig	-0.0223439	0.0037759	-0.0166052	0.00323161	0.246925	not_sig
HDL	13	41635301	C	G	0.7914	not_sig	-0.0251983	0.00637508	-0.0232005	0.00588258	0.817358	not_sig	-0.0313574	0.00731878	-0.0237992	0.00631732	0.433093	not_sig
LDL	13	41635301	C	G	0.3871	not_sig	-0.0105072	0.00619413	-0.0232514	0.00561626	0.126405	not_sig	-0.0143633	0.00706032	-0.0235777	0.00598035	0.317994	not_sig
TC	13	41635301	C	G	0.1599	not_sig	-0.0149432	0.0062155	-0.0299087	0.00566574	0.074366	not_sig	-0.0175506	0.00705834	-0.0311437	0.00601639	0.141653	not_sig
HDL	13	45492138	G	T	0.656	not_sig	0.0407816	0.00968354	0.023132	0.00893018	0.179084	not_sig	0.0352238	0.0111159	0.0265697	0.00960562	0.554729	not_sig
logTG	13	45970147	A	G	0.7332	not_sig	0.08149	0.0207356	0.0675707	0.0186848	0.617031	not_sig	0.0725687	0.0237753	0.0673672	0.0200868	0.866916	not_sig
TC	13	50048401	C	CA	0.7582	not_sig	0.016359	0.00551597	0.00900232	0.00502759	0.32294	not_sig	0.0212863	0.00627382	0.0126289	0.00534987	0.292391	not_sig
LDL	13	50104386	A	G	0.8948	not_sig	-0.00226011	0.00325792	-0.00338572	0.00296164	0.797672	not_sig	-0.00283141	0.00371692	-0.0034377	0.00315719	0.900792	not_sig
logTG	13	50655989	G	T	0.8971	not_sig	-0.0546082	0.0121917	-0.0475831	0.0110332	0.668346	not_sig	-0.046845	0.0138604	-0.042132	0.0117912	0.795092	not_sig
nonHDL	13	50655989	G	T	0.7595	not_sig	-0.0365552	0.0126425	-0.0411577	0.0114505	0.786721	not_sig	-0.0332053	0.0142832	-0.0395831	0.0121324	0.73291	not_sig
HDL	13	50707087	G	C	0.9108	not_sig	0.0151843	0.0116147	0.0132206	0.0106188	0.900419	not_sig	0.00888921	0.0132797	0.00463212	0.0113592	0.807016	not_sig
TC	13	51151633	G	A	0.1847	not_sig	0.00894201	0.00330079	0.00377299	0.00302019	0.246642	not_sig	0.0094897	0.00374863	0.00247422	0.00321023	0.154048	not_sig
logTG	13	51172963	G	A	0.1619	not_sig	-0.00990717	0.00561166	-0.0148921	0.00511744	0.510418	not_sig	-0.00795748	0.00640485	-0.0158915	0.0054829	0.345364	not_sig
HDL	13	51214613	A	G	0.9876	not_sig	-0.0121035	0.00515075	-0.0130224	0.00475442	0.895421	not_sig	-0.0121952	0.0059174	-0.012246	0.00510216	0.994798	not_sig
HDL	13	58391491	T	C	0.8026	not_sig	-0.00827876	0.00372355	-0.0128633	0.00344362	0.365	not_sig	-0.0114515	0.00428663	-0.0109444	0.00370293	0.928469	not_sig
LDL	13	74748606	G	A	0.08131	not_sig	0.0116417	0.00328788	0.00786802	0.00298357	0.394031	not_sig	0.0119034	0.00375001	0.00759505	0.00317795	0.379464	not_sig
nonHDL	13	74748606	G	A	0.2885	not_sig	0.00958303	0.00343419	0.00660965	0.00314466	0.521966	not_sig	0.00888497	0.00390722	0.00622714	0.00334706	0.604443	not_sig
TC	13	74748606	G	A	0.3936	not_sig	0.010715	0.00329871	0.0100127	0.00301034	0.874687	not_sig	0.0117713	0.00374829	0.00961326	0.00319752	0.660503	not_sig
LDL	13	95226210	G	C	0.9549	not_sig	0.00944866	0.00364483	0.00428637	0.00330772	0.292925	not_sig	0.0115488	0.00416347	0.00541289	0.00352914	0.259615	not_sig
logTG	13	95258944	T	C	0.1674	not_sig	-0.0171176	0.0035139	-0.0131652	0.00322034	0.405683	not_sig	-0.0188342	0.0040235	-0.0142716	0.00345776	0.388464	not_sig
HDL	13	108960380	TGCTG	T	0.5425	not_sig	-0.0437664	0.0127247	-0.050456	0.0117004	0.697968	not_sig	-0.0469357	0.0145829	-0.0469709	0.0125918	0.998538	not_sig
TC	13	110411642	A	C	0.5241	not_sig	0.00550891	0.00337311	0.00491421	0.00307526	0.896055	not_sig	0.00474415	0.00383262	0.00500577	0.00326817	0.958461	not_sig
nonHDL	13	111033821	C	A	0.4052	not_sig	-0.012785	0.00349847	-0.0114587	0.00319822	0.779027	not_sig	-0.0146794	0.00398295	-0.0141703	0.00340844	0.92242	not_sig
TC	13	111033821	C	A	0.1621	not_sig	-0.0112931	0.00335886	-0.00919463	0.00306111	0.64333	not_sig	-0.013356	0.0038185	-0.0123928	0.00325473	0.847347	not_sig
logTG	13	111038379	T	C	0.6616	not_sig	-0.00894139	0.00375617	-0.00892836	0.00342474	0.997948	not_sig	-0.00754157	0.0043034	-0.00784364	0.00367848	0.95733	not_sig
LDL	13	111039070	A	G	0.39	not_sig	0.0129646	0.00337204	0.0101629	0.00305449	0.536901	not_sig	0.0158289	0.00384843	0.013098	0.00325633	0.586992	not_sig
HDL	13	113927208	G	T	0.6449	not_sig	0.0158414	0.00401938	0.0176023	0.00372429	0.747266	not_sig	0.0166839	0.00462706	0.0179185	0.00400883	0.839739	not_sig
TC	13	113927208	G	T	0.01689	not_sig	0.0134957	0.00392058	0.0155342	0.0035875	0.70048	not_sig	0.0127583	0.00445993	0.0143863	0.00381792	0.780968	not_sig
LDL	13	114551993	T	C	0.2353	not_sig	0.0260296	0.00347144	0.0255646	0.00316024	0.920884	not_sig	0.026477	0.00396584	0.0270574	0.00337338	0.91099	not_sig
logTG	13	114551993	T	C	0.04997	not_sig	0.0289159	0.00349163	0.0215599	0.00319728	0.11922	not_sig	0.0307052	0.00400225	0.0227371	0.00343713	0.129896	not_sig
nonHDL	13	114551993	T	C	0.3798	not_sig	0.0282229	0.00362943	0.0286391	0.00332991	0.932481	not_sig	0.0301535	0.00413671	0.0309111	0.00355166	0.889175	not_sig
TC	13	114551993	T	C	0.3303	not_sig	0.0275334	0.00348282	0.0272689	0.00318818	0.955201	not_sig	0.0301028	0.00396424	0.0292471	0.00339379	0.869397	not_sig
LDL	14	21492229	G	A	0.3614	not_sig	-0.0296145	0.0161099	-0.0335949	0.014897	0.855654	not_sig	-0.0240349	0.0183248	-0.0290164	0.0158016	0.836447	not_sig
TC	14	21492229	G	A	0.1337	not_sig	-0.0285522	0.0161692	-0.0376866	0.01503	0.678199	not_sig	-0.0278048	0.0183201	-0.0347063	0.0159053	0.775454	not_sig
logTG	14	23685442	G	A	0.2163	not_sig	-0.011788	0.00417267	-0.0126991	0.00381348	0.871604	not_sig	-0.00901641	0.00476812	-0.0154619	0.00409253	0.303674	not_sig
logTG	14	24560159	A	G	0.4172	not_sig	-0.0263165	0.0131312	-0.0441086	0.0119747	0.315408	not_sig	-0.0244388	0.0149104	-0.0423232	0.0128169	0.36172	not_sig
LDL	14	24871926	C	T	0.02982	not_sig	0.0184009	0.00327844	0.0212605	0.00299104	0.518186	not_sig	0.0187564	0.0037424	0.0214954	0.00319122	0.576551	not_sig
TC	14	24871926	C	T	0.333	not_sig	0.0182213	0.00328903	0.0205233	0.00301796	0.60507	not_sig	0.0190507	0.00374052	0.0203346	0.00321102	0.793974	not_sig
nonHDL	14	24872209	T	C	0.02463	not_sig	-0.015695	0.00340906	-0.0202332	0.00313234	0.325617	not_sig	-0.0170984	0.00388016	-0.0203047	0.00333867	0.529943	not_sig
nonHDL	14	31725111	G	A	0.3628	not_sig	-0.0425458	0.0132481	-0.0443243	0.0122711	0.921326	not_sig	-0.0320067	0.015054	-0.0446993	0.01301	0.522381	not_sig
TC	14	31727404	G	GT	0.4044	not_sig	-0.0408794	0.012745	-0.039988	0.0117486	0.958872	not_sig	-0.0318819	0.0144823	-0.0406736	0.0124384	0.644232	not_sig
LDL	14	31735087	G	T	0.4499	not_sig	-0.0424905	0.0120934	-0.0332716	0.0110628	0.572736	not_sig	-0.0382085	0.0137711	-0.0308605	0.0117508	0.683998	not_sig
HDL	14	33175822	G	A	0.4867	not_sig	0.0114982	0.00344112	0.00649185	0.0031847	0.284296	not_sig	0.0129427	0.00394993	0.0072853	0.00342465	0.277853	not_sig
LDL	14	35186694	C	T	0.607	not_sig	-0.0120355	0.00368576	-0.0149637	0.00335128	0.555566	not_sig	-0.0131976	0.00419436	-0.0147017	0.00357443	0.784326	not_sig
nonHDL	14	35186694	C	T	0.5496	not_sig	-0.01067	0.00385219	-0.0126126	0.00353169	0.709337	not_sig	-0.0114526	0.00437127	-0.0117971	0.00376368	0.952248	not_sig
TC	14	35186694	C	T	0.7694	not_sig	-0.00982116	0.00369842	-0.0138133	0.00338114	0.424364	not_sig	-0.0125456	0.00419319	-0.0131112	0.00359626	0.918226	not_sig
logTG	14	38848824	T	A	0.4335	not_sig	-0.00585766	0.00376498	-0.00688208	0.0034584	0.840748	not_sig	-0.00492262	0.00430076	-0.0069919	0.00371023	0.714878	not_sig
TC	14	39766074	C	T	0.7615	not_sig	0.00474002	0.0041608	0.0129262	0.00381027	0.14567	not_sig	0.00746849	0.00472425	0.0118854	0.00405327	0.476758	not_sig
logTG	14	50655357	G	C	0.9217	not_sig	-0.0440735	0.0156992	-0.0398731	0.0141727	0.842146	not_sig	-0.041409	0.017886	-0.0312588	0.0151182	0.663854	not_sig
logTG	14	52470889	A	G	0.4826	not_sig	0.00824545	0.00473611	0.00722268	0.00434055	0.87316	not_sig	0.0104639	0.00542014	0.00856269	0.00466246	0.789737	not_sig
HDL	14	52493161	T	C	0.8912	not_sig	-0.00797177	0.00378878	-0.00895303	0.00350203	0.848746	not_sig	-0.00719903	0.004359	-0.00857596	0.00376637	0.810581	not_sig
logTG	14	60749118	G	C	0.2665	not_sig	0.00803761	0.003421	0.00470916	0.00312363	0.471226	not_sig	0.00801502	0.00391547	0.00296793	0.00335406	0.32628	not_sig
LDL	14	64233980	C	T	0.05418	not_sig	0.0121643	0.00443146	0.0198514	0.00404532	0.198901	not_sig	0.0185014	0.00505397	0.0222609	0.00431646	0.57058	not_sig
TC	14	64236157	A	G	0.4174	not_sig	0.0121186	0.00444095	0.0194332	0.00407681	0.223716	not_sig	0.017352	0.00504588	0.021849	0.004338	0.497988	not_sig
nonHDL	14	64239351	T	C	0.4855	not_sig	0.0156261	0.00463792	0.0187718	0.00427042	0.616837	not_sig	0.0221108	0.00527393	0.020991	0.00455345	0.871977	not_sig
logTG	14	64239629	T	G	0.9095	not_sig	0.0216314	0.0044614	0.0159864	0.00409732	0.350048	not_sig	0.0227265	0.0051043	0.0164991	0.00440302	0.354261	not_sig
HDL	14	65870594	G	T	0.3505	not_sig	0.00726982	0.00356127	0.00414248	0.00329718	0.51817	not_sig	0.00853418	0.00408584	0.00717236	0.00354312	0.800652	not_sig
HDL	14	69149372	A	G	0.01986	not_sig	0.0213286	0.00654528	0.030153	0.00605105	0.320844	not_sig	0.0179064	0.00750782	0.0319444	0.00649095	0.156091	not_sig
logTG	14	69285264	G	A	0.7239	not_sig	0.0116113	0.00328451	0.0072112	0.00300302	0.321477	not_sig	0.0114912	0.00376085	0.0073748	0.00322486	0.404742	not_sig
HDL	14	70833819	C	G	0.9341	not_sig	-0.00639274	0.0033463	-0.00429313	0.00309853	0.644323	not_sig	-0.00556333	0.0038481	-0.0039869	0.00333243	0.756155	not_sig
nonHDL	14	70846954	T	C	0.166	not_sig	0.0222096	0.0049226	0.0187224	0.00450319	0.600174	not_sig	0.026065	0.0055859	0.0179024	0.00479646	0.266264	not_sig
TC	14	70847103	A	G	0.044	not_sig	0.0180351	0.00474309	0.0168382	0.00432948	0.851749	not_sig	0.0215566	0.0053734	0.0178534	0.00459999	0.599608	not_sig
LDL	14	70857022	C	T	0.007797	not_sig	0.0245509	0.00470484	0.0205016	0.00427	0.522764	not_sig	0.0266132	0.00534934	0.0210016	0.00455007	0.422982	not_sig
HDL	14	74250126	T	C	0.01026	not_sig	0.0134117	0.00379962	0.0168821	0.0035135	0.501288	not_sig	0.0116713	0.00435895	0.0159576	0.00377313	0.455951	not_sig
LDL	14	74250126	T	C	0.3123	not_sig	-0.0166428	0.00368965	-0.0139876	0.00335584	0.593444	not_sig	-0.0150815	0.0042006	-0.0164615	0.00357376	0.801886	not_sig
nonHDL	14	74250126	T	C	0.8928	not_sig	-0.0158171	0.00385963	-0.0137016	0.00353643	0.685304	not_sig	-0.0157009	0.00438228	-0.0159517	0.00376281	0.965275	not_sig
TC	14	74250126	T	C	0.3978	not_sig	-0.0109834	0.00370207	-0.00682677	0.00338586	0.406079	not_sig	-0.0112324	0.00419882	-0.0103951	0.00359575	0.879281	not_sig
TC	14	75293374	A	G	0.6992	not_sig	-0.010993	0.00326863	-0.0104229	0.00298068	0.897174	not_sig	-0.0130592	0.00371581	-0.00993811	0.00316844	0.521587	not_sig
HDL	14	75299101	G	A	0.09024	not_sig	-0.00871403	0.00335233	-0.0119701	0.00309389	0.474155	not_sig	-0.00828277	0.0038538	-0.013344	0.00332591	0.318776	not_sig
nonHDL	14	75326771	C	T	0.6629	not_sig	0.0068101	0.00347456	0.00696223	0.0031902	0.9742	not_sig	0.0084155	0.00395181	0.00711983	0.00339759	0.80313	not_sig
LDL	14	75327443	T	C	0.8419	not_sig	0.00681925	0.00332532	0.00753966	0.00302575	0.872345	not_sig	0.0088418	0.00379245	0.00861302	0.00322515	0.963247	not_sig
HDL	14	79939993	G	A	0.3271	not_sig	-0.0124505	0.00403361	-0.00529479	0.00371486	0.19069	not_sig	-0.0120618	0.00464426	-0.00371594	0.00399299	0.171819	not_sig
HDL	14	81701004	T	C	0.8776	not_sig	0.0103119	0.00397523	0.011751	0.0036686	0.789632	not_sig	0.00822309	0.00456127	0.0120649	0.00394213	0.522825	not_sig
HDL	14	89804507	T	C	0.08725	not_sig	0.00956752	0.00423505	0.0191825	0.00393254	0.0952551	not_sig	0.00821685	0.00486726	0.0181557	0.00423212	0.122303	not_sig
logTG	14	89804856	G	A	0.03625	not_sig	-0.00113972	0.00413041	-0.0190414	0.00379278	0.00136841	not_sig	0.00151284	0.0047279	-0.0182276	0.00407638	0.00151955	not_sig
nonHDL	14	90048934	T	C	0.0006655	not_sig	-0.00514393	0.00353722	-0.0090612	0.00325152	0.413601	not_sig	-0.00840619	0.00402619	-0.00955562	0.00346478	0.828218	not_sig
LDL	14	90058243	G	A	0.004263	not_sig	-0.00685119	0.00337289	-0.00628027	0.00307389	0.900165	not_sig	-0.00920182	0.0038518	-0.00610804	0.00327686	0.53958	not_sig
TC	14	90058243	G	A	0.007191	not_sig	-0.00426752	0.00338425	-0.00311151	0.00310128	0.800628	not_sig	-0.00803551	0.0038502	-0.00339801	0.00329686	0.358925	not_sig
HDL	14	92504973	T	TA	0.5624	not_sig	0.0107528	0.00390793	0.00903582	0.00361658	0.746424	not_sig	0.00948832	0.00449471	0.0103252	0.00388881	0.88772	not_sig
LDL	14	94847262	T	A	0.001737	not_sig	0.0285236	0.0075414	0.0366338	0.00686043	0.425039	not_sig	0.0245438	0.00860616	0.0360121	0.00733178	0.309078	not_sig
nonHDL	14	94847262	T	A	0.07637	not_sig	0.0262344	0.0078697	0.0330965	0.00722563	0.519531	not_sig	0.021277	0.00895181	0.0330668	0.00771704	0.317179	not_sig
TC	14	94847262	T	A	0.0009541	not_sig	0.0227614	0.00756754	0.0321725	0.00691981	0.357409	not_sig	0.0193316	0.00860305	0.031932	0.00737406	0.264809	not_sig
HDL	14	100359294	T	C	0.7071	not_sig	-0.011815	0.00438488	-0.00866342	0.00406362	0.597056	not_sig	-0.0169006	0.00504298	-0.00906466	0.00436667	0.238835	not_sig
logTG	14	100765823	T	C	0.6165	not_sig	-0.0264798	0.00607989	-0.0198558	0.00556945	0.420473	not_sig	-0.0270209	0.0069403	-0.022587	0.00597939	0.627441	not_sig
HDL	14	101194561	A	G	0.1128	not_sig	-0.00803585	0.00371381	-0.00787379	0.00343885	0.974386	not_sig	-0.00781541	0.0042746	-0.00747851	0.00369611	0.952329	not_sig
LDL	14	102622225	C	T	0.1655	not_sig	0.00945668	0.00403107	0.00496313	0.00365053	0.407356	not_sig	0.00912459	0.00459904	0.00501995	0.00389242	0.494529	not_sig
TC	14	102675350	G	C	0.141	not_sig	-0.0113408	0.00407752	-0.00596565	0.00371339	0.328404	not_sig	-0.0114493	0.0046349	-0.00643312	0.00394973	0.408808	not_sig
HDL	14	103307655	G	C	0.02151	not_sig	-0.0140238	0.00416939	-0.0138495	0.00386758	0.975484	not_sig	-0.0143265	0.00479815	-0.0138156	0.00416061	0.935706	not_sig
logTG	14	104293533	T	C	0.2645	not_sig	0.00553716	0.00346147	0.0100481	0.00315769	0.334322	not_sig	0.00386319	0.00396292	0.0112681	0.00339186	0.154598	not_sig
HDL	14	105258437	G	T	2.1e-05	sig	-0.0169	0.00344699	-0.0250073	0.00318587	0.0842885	not_sig	-0.0157917	0.00396685	-0.0272	0.00342624	0.0294	not_sig
HDL	15	23932467	G	A	0.7173	not_sig	0.00808975	0.0033774	0.00966759	0.00312994	0.731142	not_sig	0.00836549	0.00388389	0.0107506	0.0033679	0.641762	not_sig
logTG	15	31637666	T	C	0.5392	not_sig	0.0127495	0.00435063	0.0146786	0.0039794	0.742839	not_sig	0.0138154	0.00498196	0.0140899	0.00427378	0.966556	not_sig
HDL	15	39447529	A	G	0.1876	not_sig	0.00910897	0.0047365	0.00724617	0.00437451	0.772033	not_sig	0.00889307	0.00545092	0.00611356	0.00470511	0.698708	not_sig
logTG	15	39447529	A	G	0.4087	not_sig	-0.0138763	0.00463033	-0.0106078	0.00422242	0.600958	not_sig	-0.012605	0.00530698	-0.00989597	0.00453463	0.697161	not_sig
logTG	15	40400195	T	C	0.8658	not_sig	0.0153105	0.00355824	0.0110464	0.00326095	0.375663	not_sig	0.0143922	0.00407239	0.0121024	0.00350434	0.669104	not_sig
TC	15	40616986	T	C	0.6021	not_sig	-0.00882066	0.00610742	-0.0114464	0.00559119	0.750497	not_sig	-0.00816828	0.00694395	-0.0147593	0.00594036	0.469529	not_sig
HDL	15	40751555	C	A	0.07913	not_sig	0.00816053	0.00334771	0.00851111	0.00309995	0.938581	not_sig	0.00826787	0.00385211	0.00864383	0.003333	0.941003	not_sig
logTG	15	41057507	C	T	0.8388	not_sig	-0.0164128	0.00561947	-0.016223	0.0051191	0.980024	not_sig	-0.0204751	0.0064105	-0.011943	0.00548771	0.310649	not_sig
logTG	15	41880619	A	G	0.121	not_sig	-0.00936353	0.00349843	-0.00791135	0.00319833	0.758682	not_sig	-0.0114703	0.00400215	-0.00947531	0.00343484	0.704464	not_sig
HDL	15	41888918	A	G	0.1572	not_sig	0.0149404	0.00361345	0.017613	0.0033442	0.586217	not_sig	0.0160638	0.00415151	0.0186463	0.00359567	0.637281	not_sig
HDL	15	43820717	C	T	0.002551	not_sig	-0.077494	0.010758	-0.100859	0.00987156	0.108563	not_sig	-0.075111	0.012449	-0.0967	0.0106547	0.186	not_sig
logTG	15	44027885	T	C	1.15e-05	sig	0.124	0.010525	0.145626	0.0095526	0.134928	not_sig	0.125464	0.0121296	0.151	0.0103017	0.111	not_sig
nonHDL	15	44027885	T	C	0.0003038	not_sig	0.059376	0.0109181	0.0160456	0.00992996	0.00323885	not_sig	0.075937	0.0125095	0.0237187	0.0106232	0.00142015	not_sig
logTG	15	45001900	A	G	0.5213	not_sig	0.018101	0.0050432	0.0146983	0.00458185	0.616535	not_sig	0.0137532	0.00577233	0.0153111	0.00491453	0.836738	not_sig
LDL	15	49336477	T	A	0.3169	not_sig	-0.0089505	0.00335013	-0.011384	0.00304557	0.589897	not_sig	-0.0110572	0.00382447	-0.0130762	0.00324517	0.686479	not_sig
TC	15	49336477	T	A	0.7424	not_sig	-0.00800164	0.00336102	-0.0104579	0.00307296	0.588605	not_sig	-0.00989934	0.00382241	-0.0120641	0.00326536	0.665894	not_sig
nonHDL	15	49527624	T	C	0.6033	not_sig	-0.011315	0.00354254	-0.0110748	0.00324493	0.960015	not_sig	-0.0141791	0.00403266	-0.0138092	0.0034557	0.944317	not_sig
HDL	15	50993673	TAAAA	T	0.5164	not_sig	-0.00839229	0.00420346	-0.00332435	0.00390309	0.375638	not_sig	-0.0107974	0.00483578	-0.00398467	0.00419437	0.285882	not_sig
HDL	15	53001538	T	C	0.5639	not_sig	0.0111295	0.00405656	0.00728507	0.00375477	0.485531	not_sig	0.0140331	0.00466435	0.00763891	0.00403592	0.298561	not_sig
LDL	15	53096084	C	G	0.5188	not_sig	-0.0149737	0.00474193	-0.00851444	0.00431918	0.312583	not_sig	-0.0144246	0.00540202	-0.00728433	0.00460688	0.313221	not_sig
nonHDL	15	53096084	C	G	0.4497	not_sig	-0.0100288	0.00495693	-0.00702152	0.00455209	0.654094	not_sig	-0.009357	0.00562903	-0.00776848	0.00485154	0.830273	not_sig
TC	15	53096084	C	G	0.1688	not_sig	-0.0141759	0.00475858	-0.00768728	0.0043571	0.313237	not_sig	-0.0133892	0.00540032	-0.00666489	0.00463406	0.343362	not_sig
LDL	15	53739426	A	C	0.001257	not_sig	-0.0748143	0.0141054	-0.0251999	0.0127087	0.00878223	not_sig	-0.0683597	0.0160098	-0.0282	0.0134945	0.0544479	not_sig
nonHDL	15	53739426	A	C	0.0002366	not_sig	-0.073761	0.0147587	-0.0181934	0.0134074	0.00519719	not_sig	-0.0685249	0.016705	-0.0208	0.0142341	0.0291	not_sig
TC	15	53739426	A	C	0.02209	not_sig	-0.0662325	0.0141582	-0.0183007	0.0128178	0.0118471	not_sig	-0.0609571	0.0160092	-0.0219663	0.0135732	0.0624895	not_sig
HDL	15	57254842	T	A	0.1357	not_sig	0.0135651	0.00384325	0.00221561	0.00355128	0.0296351	not_sig	0.0140355	0.00441577	0.00331621	0.0038162	0.065517	not_sig
LDL	15	57297078	A	T	0.07822	not_sig	0.0335957	0.0062546	0.0267959	0.0057064	0.420607	not_sig	0.0310017	0.00716616	0.0282919	0.00608412	0.772535	not_sig
logTG	15	57297078	A	T	0.5276	not_sig	0.0333159	0.00629053	0.0186669	0.00577349	0.0853568	not_sig	0.0366976	0.00723109	0.0167129	0.00619966	0.0353859	not_sig
nonHDL	15	57297078	A	T	0.5703	not_sig	0.0367967	0.00653425	0.028919	0.00601503	0.373756	not_sig	0.0358505	0.00746633	0.0302752	0.00641298	0.570026	not_sig
TC	15	57297078	A	T	0.9655	not_sig	0.0332428	0.00627557	0.0267589	0.00575703	0.445184	not_sig	0.0319719	0.00716304	0.0280789	0.00612155	0.678661	not_sig
HDL	15	57920703	A	G	0.4409	not_sig	0.00853307	0.00340982	0.00657143	0.00315797	0.672111	not_sig	0.0106605	0.00392108	0.00652386	0.00339422	0.423812	not_sig
HDL	15	58680178	T	C	0.03446	not_sig	0.0987564	0.00349295	0.0900863	0.00323622	0.0678753	not_sig	0.109672	0.00402182	0.0927297	0.00348061	0.00140227	not_sig
LDL	15	58722590	G	GC	0.0002602	not_sig	0.0344835	0.00399466	0.0224661	0.00363326	0.0256355	not_sig	0.0367567	0.00456426	0.0240269	0.00387775	0.0330618	not_sig
logTG	15	58723426	A	G	8.16e-10	sig	0.0382	0.00395289	0.0499785	0.00361892	0.0270195	not_sig	0.0466606	0.00453241	0.0546	0.00388969	0.181	not_sig
nonHDL	15	58723426	A	G	2.47e-05	sig	0.0364	0.00410718	0.0217197	0.00376899	0.00826942	not_sig	0.0372315	0.00468045	0.0227599	0.00401961	0.0186685	not_sig
TC	15	58723939	G	A	0.5119	not_sig	0.0677405	0.00394306	0.0618573	0.00360748	0.26965	not_sig	0.0712814	0.00448915	0.065034	0.0038394	0.288913	not_sig
HDL	15	59277019	T	C	0.2658	not_sig	0.30632	0.0651993	0.347698	0.0642584	0.650362	not_sig	0.363196	0.0753048	0.362844	0.0699325	0.997262	not_sig
logTG	15	59277019	T	C	0.01219	not_sig	0.0668869	0.0644555	0.281767	0.0620925	0.0160574	not_sig	0.0548131	0.0740072	0.278646	0.0676765	0.0252119	not_sig
TC	15	59277019	T	C	0.2395	not_sig	0.10226	0.0643381	0.211513	0.0619858	0.220087	not_sig	0.0963905	0.0733544	0.19663	0.0669085	0.311342	not_sig
HDL	15	59780362	C	G	0.2728	not_sig	-0.0137197	0.183802	-0.113778	0.162165	0.68229	not_sig	-0.024163	0.21107	-0.0479874	0.179117	0.931229	not_sig
HDL	15	61947280	C	G	0.8337	not_sig	0.00867387	0.00338405	0.00777795	0.0031333	0.845547	not_sig	0.0107355	0.0038898	0.00899041	0.00336984	0.733839	not_sig
logTG	15	61952501	G	A	0.6937	not_sig	0.00792045	0.00331353	0.0127034	0.00303463	0.285776	not_sig	0.00704721	0.00379176	0.0133192	0.00325831	0.208389	not_sig
HDL	15	63344167	A	G	0.01614	not_sig	-0.0155844	0.00368304	-0.0189598	0.00340119	0.499581	not_sig	-0.016559	0.00422977	-0.0179247	0.0036632	0.806652	not_sig
LDL	15	63788267	T	C	0.5165	not_sig	0.0118892	0.00361337	0.0187857	0.00328369	0.156658	not_sig	0.0117655	0.00412229	0.0202017	0.00350114	0.117795	not_sig
nonHDL	15	63791063	T	C	0.2013	not_sig	0.016151	0.0035738	0.0168128	0.00328481	0.891247	not_sig	0.0189612	0.00406483	0.01776	0.00350159	0.822359	not_sig
TC	15	63791063	T	C	0.5256	not_sig	0.0151362	0.00343089	0.0177375	0.00314469	0.57516	not_sig	0.018015	0.00389838	0.0198177	0.0033444	0.724878	not_sig
logTG	15	63793238	T	G	0.8276	not_sig	0.0270183	0.003436	0.0193835	0.00315089	0.100545	not_sig	0.0298608	0.00393159	0.0205877	0.00338431	0.073057	not_sig
HDL	15	63910433	G	T	0.7892	not_sig	0.00583756	0.0036292	0.0164495	0.00334904	0.0311742	not_sig	0.00597666	0.00417113	0.0151554	0.00360072	0.094855	not_sig
logTG	15	66872114	C	T	0.6544	not_sig	0.0152799	0.00340924	0.0133258	0.00312587	0.671829	not_sig	0.0159119	0.00390684	0.0144411	0.00335674	0.77463	not_sig
HDL	15	66877172	G	A	0.8218	not_sig	0.00890857	0.00337234	0.00968423	0.00311872	0.865534	not_sig	0.00715643	0.00388351	0.0097779	0.00334871	0.608215	not_sig
LDL	15	67428014	C	A	0.4992	not_sig	0.00503436	0.00405092	0.00474458	0.00367199	0.957614	not_sig	0.0045479	0.00463026	0.00630764	0.00391529	0.771048	not_sig
nonHDL	15	67428014	C	A	0.9629	not_sig	0.00676976	0.00423159	0.00441375	0.00387138	0.680392	not_sig	0.00663005	0.00482346	0.00682988	0.0041242	0.974812	not_sig
TC	15	67428014	C	A	0.376	not_sig	0.00492803	0.00406449	0.00370248	0.00370485	0.823178	not_sig	0.00583507	0.00462815	0.00596761	0.00393926	0.982553	not_sig
HDL	15	68014971	C	T	0.9488	not_sig	-0.00616459	0.00334894	-0.0106857	0.00309187	0.319895	not_sig	-0.00532581	0.00385058	-0.0108192	0.0033256	0.278952	not_sig
HDL	15	70182851	A	G	0.08433	not_sig	0.0779698	0.058361	0.152631	0.0569117	0.358386	not_sig	0.149684	0.0659509	0.154544	0.06037	0.956529	not_sig
logTG	15	70189590	A	C	0.3234	not_sig	-0.0802189	0.0571569	-0.133315	0.0539614	0.498177	not_sig	-0.102105	0.0646789	-0.170291	0.0573258	0.428874	not_sig
logTG	15	72543084	G	A	0.3194	not_sig	-0.00906427	0.0038502	-0.00824659	0.00351212	0.874981	not_sig	-0.00852836	0.00440673	-0.00787548	0.00376908	0.91011	not_sig
logTG	15	73091283	G	T	0.1406	not_sig	0.00866928	0.00348863	0.00555817	0.00318373	0.508907	not_sig	0.00940318	0.00398961	0.00507316	0.00341971	0.408634	not_sig
HDL	15	73431600	T	G	0.7875	not_sig	-0.00514231	0.00336788	-0.00698571	0.00311173	0.686849	not_sig	-0.00560189	0.00387417	-0.00767729	0.00334701	0.684383	not_sig
LDL	15	75116167	C	T	0.1747	not_sig	0.0103357	0.00333582	0.00940848	0.00302442	0.836407	not_sig	0.0109331	0.00380831	0.00977167	0.00322253	0.815408	not_sig
nonHDL	15	75125645	A	C	0.05541	not_sig	0.00877508	0.00346121	0.00957797	0.00316894	0.86378	not_sig	0.00930009	0.00394063	0.00888434	0.00337452	0.935954	not_sig
TC	15	75125645	A	C	0.3448	not_sig	0.0107123	0.00332449	0.0108574	0.0030333	0.974219	not_sig	0.0114679	0.00378052	0.00978327	0.0032231	0.73383	not_sig
TC	15	89086653	A	T	0.1885	not_sig	0.00438712	0.00340956	0.00435239	0.00311532	0.993985	not_sig	0.00750004	0.00387355	0.00494067	0.00330821	0.614394	not_sig
HDL	15	90214777	A	G	0.7418	not_sig	0.20445	0.0562313	0.154219	0.0541788	0.518877	not_sig	0.170022	0.0624102	0.115185	0.0575524	0.517168	not_sig
logTG	15	90214777	A	G	0.2771	not_sig	-0.208623	0.0544125	-0.21296	0.0517037	0.953788	not_sig	-0.218357	0.0602876	-0.204744	0.0549132	0.867062	not_sig
HDL	15	96714816	C	A	0.04924	not_sig	0.00464669	0.0037787	0.0104022	0.00348766	0.261708	not_sig	0.00705962	0.00434163	0.010562	0.00375305	0.540557	not_sig
HDL	15	99281192	C	T	0.5664	not_sig	0.00575226	0.00350794	0.00624909	0.00325258	0.917055	not_sig	0.00588475	0.00402983	0.00408993	0.0034978	0.735907	not_sig
HDL	15	102068658	G	A	0.4361	not_sig	0.0054954	0.00385449	0.00709292	0.00356952	0.760417	not_sig	0.00457217	0.00442864	0.00842538	0.00383802	0.50969	not_sig
LDL	15	102068658	G	A	0.06237	not_sig	-0.010887	0.00374571	-0.00476093	0.00340779	0.225095	not_sig	-0.00685126	0.00427093	-0.00414186	0.00363356	0.628029	not_sig
logTG	15	102068658	G	A	0.2088	not_sig	0.0202482	0.00376687	0.0162143	0.00344811	0.428303	not_sig	0.0208793	0.00430901	0.0150422	0.00370267	0.302893	not_sig
logTG	16	962154	T	C	0.4954	not_sig	-0.018292	0.0033676	-0.0102488	0.00308456	0.0773756	not_sig	-0.0174583	0.00385159	-0.0120649	0.00331039	0.286927	not_sig
HDL	16	1012393	T	C	0.3157	not_sig	0.0109182	0.00375633	0.00793453	0.00347647	0.558835	not_sig	0.0130968	0.00431607	0.00791902	0.00373997	0.363283	not_sig
TC	16	1374951	C	G	0.1048	not_sig	-0.0297991	0.00822645	-0.00669223	0.00745806	0.0369134	not_sig	-0.0307354	0.0093475	-0.0069692	0.00792283	0.0517902	not_sig
TC	16	2146288	C	T	0.736	not_sig	0.0136012	0.00543648	0.00932824	0.00495906	0.560366	not_sig	0.0197186	0.006173	0.00893461	0.00527636	0.182989	not_sig
HDL	16	2163962	A	G	0.6227	not_sig	0.0159	0.00565526	0.0119521	0.00524823	0.607872	not_sig	0.0198923	0.00648259	0.0121248	0.00563991	0.364691	not_sig
HDL	16	4014282	C	G	0.0312	not_sig	-0.00483425	0.00344908	-0.00718903	0.00318755	0.615116	not_sig	-0.00593662	0.00396562	-0.00632318	0.00342511	0.941032	not_sig
HDL	16	4677604	C	A	0.09598	not_sig	-0.00806536	0.00499038	-0.0203168	0.0046291	0.0710946	not_sig	-0.0112477	0.00574778	-0.0232004	0.00497435	0.114848	not_sig
logTG	16	4677604	C	A	0.1867	not_sig	0.0197789	0.00487521	0.0126473	0.00447621	0.279912	not_sig	0.0199557	0.00558833	0.014432	0.00480324	0.452262	not_sig
HDL	16	11464263	G	A	0.7954	not_sig	0.00678144	0.00406988	0.0122085	0.0037588	0.325944	not_sig	0.00430137	0.00466967	0.0126477	0.00404238	0.175397	not_sig
LDL	16	11706100	G	A	0.0545	not_sig	0.0245536	0.00625734	0.0393833	0.00566415	0.0780866	not_sig	0.0278818	0.00715998	0.0375701	0.00606469	0.300509	not_sig
nonHDL	16	11706100	G	A	0.00474	not_sig	0.0239212	0.00653837	0.040094	0.0059709	0.0670147	not_sig	0.0298797	0.00745529	0.040022	0.00638914	0.300289	not_sig
TC	16	11706100	G	A	0.01717	not_sig	0.0217321	0.00627782	0.0373618	0.00571427	0.0648543	not_sig	0.0256544	0.00715578	0.0373572	0.00610123	0.212067	not_sig
logTG	16	11839326	G	T	0.5879	not_sig	0.00431592	0.00334467	0.00614014	0.00305797	0.686474	not_sig	0.00475829	0.00382665	0.00638709	0.00328536	0.74606	not_sig
LDL	16	14395073	TG	T	0.9455	not_sig	-0.00839881	0.0035136	-0.00764367	0.00320868	0.873558	not_sig	-0.00857419	0.00400225	-0.00962722	0.00342081	0.841046	not_sig
TC	16	14395073	TG	T	0.5466	not_sig	-0.00756654	0.00352518	-0.00817981	0.0032373	0.897762	not_sig	-0.00886003	0.00400045	-0.0111234	0.00344174	0.667146	not_sig
logTG	16	15150505	C	A	0.1882	not_sig	-0.0247043	0.00359609	-0.0203038	0.0032701	0.363954	not_sig	-0.0244303	0.00411515	-0.0201357	0.00350739	0.425769	not_sig
HDL	16	15172118	T	C	0.6758	not_sig	0.015129	0.00367569	0.0200542	0.00338264	0.322805	not_sig	0.0149704	0.00422642	0.0196153	0.00363458	0.403401	not_sig
TC	16	19935389	G	A	0.1686	not_sig	0.0149637	0.00467453	0.0116836	0.0042683	0.603337	not_sig	0.0211291	0.00531535	0.011406	0.00453915	0.163055	not_sig
HDL	16	19967822	C	T	0.101	not_sig	0.0161177	0.00480032	0.0119474	0.00443291	0.52217	not_sig	0.015536	0.00551976	0.0109389	0.00476599	0.527309	not_sig
TC	16	21089905	G	T	0.2148	not_sig	0.00896539	0.0032934	0.00226026	0.00301109	0.131878	not_sig	0.00847726	0.00374885	0.00301572	0.00320069	0.266563	not_sig
HDL	16	28865916	G	A	0.2393	not_sig	-0.00774204	0.00340849	-0.00596695	0.00315512	0.701541	not_sig	-0.00673138	0.00391838	-0.00618211	0.00339096	0.915353	not_sig
TC	16	28899411	C	T	0.3215	not_sig	0.00520957	0.00356818	0.00518193	0.00325294	0.99542	not_sig	0.00753709	0.00405424	0.00413372	0.00345595	0.521779	not_sig
HDL	16	29994922	C	T	0.6473	not_sig	-0.0130684	0.0033549	-0.0140608	0.00310247	0.827604	not_sig	-0.0136443	0.00385734	-0.0152887	0.00333607	0.746446	not_sig
TC	16	30995528	A	G	0.3008	not_sig	-0.0109769	0.0033904	-0.00898988	0.00309158	0.664097	not_sig	-0.0134157	0.00385945	-0.00940401	0.00328868	0.427573	not_sig
LDL	16	31021880	G	T	0.1291	not_sig	0.0109685	0.00340481	0.0128702	0.00309083	0.678379	not_sig	0.0142463	0.00389242	0.0122424	0.00329803	0.693686	not_sig
nonHDL	16	31049155	A	G	0.8685	not_sig	0.0121389	0.0035148	0.0135857	0.00321264	0.76062	not_sig	0.0140938	0.00400925	0.0128492	0.00342457	0.812893	not_sig
logTG	16	31110981	G	A	0.06135	not_sig	0.00956032	0.00339513	0.0158082	0.00310057	0.173002	not_sig	0.00946254	0.00388299	0.0140762	0.00332808	0.365667	not_sig
HDL	16	31378235	A	G	0.1638	not_sig	0.00948944	0.00359742	0.00734601	0.00332018	0.660619	not_sig	0.00751416	0.00413471	0.00766389	0.00356751	0.978066	not_sig
logTG	16	49886366	T	C	0.7046	not_sig	-0.0106917	0.00494129	-0.00779714	0.00449495	0.663902	not_sig	-0.00906311	0.00565549	-0.00655341	0.00482778	0.735031	not_sig
HDL	16	53126338	C	T	0.07963	not_sig	-0.00162876	0.00351204	0.00625958	0.00325933	0.0987559	not_sig	-0.00259299	0.00404021	0.00676668	0.0035051	0.0793103	not_sig
HDL	16	53806453	A	G	0.032	not_sig	-0.0195281	0.00340549	-0.00777525	0.00315659	0.0111	not_sig	-0.0173467	0.00392051	-0.0051322	0.00339864	0.0182451	not_sig
logTG	16	53811788	A	G	0.2228	not_sig	0.00322067	0.0033416	0.000962818	0.00306241	0.617	not_sig	0.00543475	0.003829	0.00148564	0.00329257	0.432948	not_sig
HDL	16	54820862	T	A	0.007279	not_sig	-0.0820438	0.102397	-0.00190477	0.0927505	0.560798	not_sig	-0.097216	0.11858	0.00679731	0.102812	0.506328	not_sig
HDL	16	55349464	T	C	0.3109	not_sig	0.0330519	0.0932176	-0.0952867	0.0883559	0.316343	not_sig	0.110773	0.108867	-0.0956651	0.0951337	0.152196	not_sig
LDL	16	55870239	G	T	0.5955	not_sig	-0.0280499	0.00887359	-0.019808	0.00800154	0.489126	not_sig	-0.0422004	0.0101187	-0.0150343	0.00850928	0.0393609	not_sig
HDL	16	55872708	G	A	0.0001975	not_sig	0.247112	0.0800991	0.562512	0.0740192	0.00373247	not_sig	0.275182	0.091973	0.536971	0.0786716	0.030086	not_sig
HDL	16	56393734	CCT	C	0.5065	not_sig	-0.0976399	0.0208146	-0.132929	0.0191381	0.210753	not_sig	-0.107105	0.0237661	-0.146819	0.0206484	0.205899	not_sig
LDL	16	56990716	C	A	1.1e-29	sig	-0.022	0.00347593	-0.043072	0.00315934	6.72e-06	sig	-0.0248302	0.00395729	-0.0466	0.00336789	2.65e-05	sig
logTG	16	56990716	C	A	0.8157	not_sig	-0.0302858	0.00349539	-0.0249108	0.00319652	0.255156	not_sig	-0.0336618	0.00399261	-0.0266113	0.00343176	0.179314	not_sig
HDL	16	56991363	C	T	0.1118	not_sig	0.198578	0.00357195	0.194965	0.00330774	0.456785	not_sig	0.213171	0.00409723	0.204	0.00355572	0.087	not_sig
nonHDL	16	56991363	C	T	4.89e-15	sig	-0.0245	0.00362826	-0.0447124	0.00332928	3.69e-05	sig	-0.0309614	0.00411915	-0.0502	0.00354597	0.000384	not_sig
TC	16	56991363	C	T	8.49e-05	sig	0.0375	0.00348495	0.0312663	0.00318537	0.184771	not_sig	0.0346783	0.00395267	0.0281	0.00338622	0.203	not_sig
HDL	16	57551366	C	T	0.3188	not_sig	-0.0298477	0.0098851	-0.03613	0.00909725	0.639115	not_sig	-0.0398083	0.0114081	-0.0421806	0.00978727	0.874253	not_sig
HDL	16	63630178	G	A	0.7812	not_sig	0.0302864	0.0938943	-0.106349	0.0839902	0.276775	not_sig	-0.0303736	0.107244	-0.126389	0.08877	0.489209	not_sig
HDL	16	66071124	G	C	0.5867	not_sig	0.044265	0.0934617	0.0516263	0.0839269	0.953139	not_sig	0.0475774	0.108085	0.071989	0.0920372	0.863099	not_sig
logTG	16	67928042	G	A	0.1489	not_sig	-0.0123532	0.00511164	-0.01216	0.00468361	0.977706	not_sig	-0.0144216	0.00586638	-0.0110865	0.00503241	0.665247	not_sig
TC	16	67973171	C	T	0.1904	not_sig	0.0137918	0.00440784	0.0155301	0.00402755	0.770326	not_sig	0.0119845	0.00501944	0.0172893	0.00428277	0.420136	not_sig
HDL	16	67985706	C	T	0.08237	not_sig	0.0517702	0.00512573	0.049001	0.0047476	0.691031	not_sig	0.0558713	0.00591507	0.0501469	0.00511027	0.462747	not_sig
HDL	16	68866671	C	G	0.9907	not_sig	-0.548675	0.080898	-0.622655	0.0695694	0.486886	not_sig	-0.493451	0.0927445	-0.595398	0.0730597	0.38659	not_sig
nonHDL	16	69160925	A	G	0.9086	not_sig	0.00776404	0.00389388	0.0129556	0.00357385	0.324632	not_sig	0.0105036	0.00443745	0.0146059	0.00380615	0.481659	not_sig
TC	16	69376269	G	A	0.9891	not_sig	-0.0285583	0.00795436	-0.0295275	0.00730705	0.928297	not_sig	-0.0297555	0.00903573	-0.0298762	0.00775564	0.991886	not_sig
LDL	16	69527385	A	G	0.5077	not_sig	0.00702353	0.00697393	0.01542	0.00634777	0.371944	not_sig	0.0102805	0.00795562	0.0182834	0.006787	0.442846	not_sig
logTG	16	69686912	A	G	0.9511	not_sig	0.016004	0.00332725	0.0170342	0.00304817	0.818935	not_sig	0.0163466	0.00380577	0.0159318	0.0032692	0.933915	not_sig
LDL	16	70375296	G	A	0.656	not_sig	0.016663	0.00688644	0.0125296	0.00628975	0.656742	not_sig	0.0219256	0.00786824	0.0135413	0.00672662	0.416693	not_sig
nonHDL	16	70375296	G	A	0.6327	not_sig	0.0184003	0.00719788	0.0149356	0.00662345	0.722445	not_sig	0.023125	0.00819929	0.0164739	0.00707663	0.538039	not_sig
TC	16	70375296	G	A	0.3942	not_sig	0.0177651	0.00690898	0.00955401	0.00634383	0.380034	not_sig	0.0231739	0.00786379	0.011433	0.00676564	0.256411	not_sig
LDL	16	72079657	C	T	0.9384	not_sig	-0.0504124	0.00411944	-0.0411128	0.00374618	0.0939769	not_sig	-0.0545179	0.00467729	-0.0419102	0.00398444	0.0396327	not_sig
TC	16	72079657	C	T	0.7778	not_sig	-0.0490454	0.00413336	-0.0408334	0.0037797	0.141499	not_sig	-0.0552154	0.00467533	-0.0425025	0.00400875	0.0384611	not_sig
nonHDL	16	72101525	C	G	0.3451	not_sig	0.0539743	0.00438426	0.0569376	0.00400899	0.616938	not_sig	0.0598401	0.00501753	0.0600213	0.0042873	0.978036	not_sig
logTG	16	72108093	G	A	0.001349	not_sig	0.0185902	0.00418202	0.0255399	0.00381464	0.218258	not_sig	0.0183794	0.00481355	0.0274619	0.00410792	0.150092	not_sig
HDL	16	72847307	A	G	0.1764	not_sig	0.106039	0.170568	0.041624	0.170681	0.788936	not_sig	0.144358	0.202144	-0.0105744	0.178742	0.564776	not_sig
TC	16	73095270	CTT	C	0.07338	not_sig	0.0088501	0.00366033	0.00988657	0.00334005	0.833866	not_sig	0.00808015	0.00415993	0.00950904	0.00355064	0.793338	not_sig
LDL	16	73101013	G	A	0.1013	not_sig	0.00667252	0.00375312	0.0070664	0.00340337	0.937861	not_sig	0.00717854	0.00428343	0.00679944	0.00362811	0.946009	not_sig
HDL	16	75205213	A	G	0.302	not_sig	0.0116428	0.0036096	0.00971921	0.00333566	0.69471	not_sig	0.0140144	0.00414903	0.00885791	0.00358592	0.34574	not_sig
HDL	16	76458533	G	A	0.02056	not_sig	-0.2414	0.108454	-0.00636367	0.0945339	0.101388	not_sig	-0.224113	0.124624	0.00826144	0.0996043	0.144152	not_sig
LDL	16	79363079	A	C	0.1769	not_sig	0.0078988	0.00337852	0.00656142	0.00307216	0.769002	not_sig	0.0102038	0.00385294	0.00648213	0.00327446	0.460485	not_sig
nonHDL	16	79363079	A	C	0.1602	not_sig	0.00963071	0.00353239	0.00797524	0.00323557	0.728931	not_sig	0.0115117	0.0040172	0.00831249	0.00344607	0.544437	not_sig
TC	16	79363079	A	C	0.373	not_sig	0.00837425	0.00339013	0.00684499	0.00309922	0.738487	not_sig	0.0119335	0.0038519	0.00590436	0.00329414	0.232934	not_sig
logTG	16	79739978	G	C	0.04496	not_sig	0.00899133	0.00351278	0.00790479	0.00321945	0.819132	not_sig	0.00835287	0.00402103	0.00639094	0.00345601	0.710604	not_sig
nonHDL	16	81524274	A	C	2.73e-08	sig	-0.00501	0.00378782	-0.0222057	0.00347039	0.000787996	not_sig	-0.00525092	0.00431351	-0.0232	0.00370206	0.00154	not_sig
HDL	16	81534790	T	C	2.08e-29	sig	0.0148	0.00364578	0.0470306	0.00337273	7.46e-11	sig	0.0151073	0.00419607	0.0447	0.00363169	9.13e-08	sig
logTG	16	81534790	T	C	1.46e-30	sig	-0.00892	0.00356411	-0.0443427	0.00325836	1.9e-13	sig	-0.00748341	0.00408408	-0.0422	0.00350324	1e-10	sig
TC	16	81683801	C	T	0.1332	not_sig	-0.746753	0.166898	-0.477893	0.124753	0.195755	not_sig	-0.929378	0.207266	-0.437213	0.133373	0.0452945	not_sig
LDL	16	83979317	T	C	0.869	not_sig	-0.0149983	0.00335956	-0.0127901	0.00305364	0.625734	not_sig	-0.0151592	0.00383371	-0.0118401	0.00325498	0.50811	not_sig
nonHDL	16	83979317	T	C	0.7086	not_sig	-0.0151677	0.00351259	-0.0126398	0.00321824	0.594657	not_sig	-0.0161031	0.00399744	-0.0114219	0.00342712	0.372672	not_sig
TC	16	83979317	T	C	0.7732	not_sig	-0.0143622	0.00337062	-0.0129512	0.0030808	0.756678	not_sig	-0.0151305	0.00383168	-0.0120271	0.00327479	0.536982	not_sig
HDL	16	85150163	A	G	0.3796	not_sig	-0.0206646	0.00569649	-0.0237064	0.00528404	0.69464	not_sig	-0.0204527	0.00655146	-0.0161941	0.00568907	0.622612	not_sig
logTG	16	85150163	A	G	0.7393	not_sig	0.0189462	0.00556481	0.0227678	0.00510255	0.611759	not_sig	0.020291	0.00637846	0.0206976	0.0054853	0.961346	not_sig
HDL	16	85927519	C	G	0.2899	not_sig	0.00763504	0.00387174	0.0100516	0.00358042	0.645868	not_sig	0.00782017	0.00445671	0.0112753	0.00385258	0.556451	not_sig
nonHDL	16	86430254	A	G	0.8591	not_sig	0.00997114	0.00392979	0.0100195	0.00360625	0.992746	not_sig	0.0092647	0.00447731	0.0116775	0.0038415	0.681724	not_sig
logTG	16	86434553	T	C	0.183	not_sig	0.00836116	0.00390773	0.0120234	0.00357502	0.488066	not_sig	0.00662661	0.00447827	0.0138335	0.00383776	0.220451	not_sig
HDL	16	88004092	A	G	0.8805	not_sig	-0.0123254	0.0033673	-0.00964158	0.00310622	0.556891	not_sig	-0.0178642	0.00387275	-0.00879431	0.00334101	0.0753767	not_sig
logTG	16	88006065	T	C	0.803	not_sig	0.0105162	0.00327525	0.00796762	0.00298821	0.564322	not_sig	0.0128294	0.00375241	0.00774043	0.00321149	0.301521	not_sig
TC	16	88535407	C	G	0.009772	not_sig	-0.00700622	0.00349751	-0.01323	0.00319127	0.187452	not_sig	-0.00736249	0.00396887	-0.0134097	0.00339244	0.245484	not_sig
HDL	16	88535670	C	T	0.942	not_sig	-0.0109758	0.00364295	-0.0105965	0.00335698	0.938804	not_sig	-0.0167482	0.00417844	-0.0139967	0.00360969	0.617292	not_sig
LDL	16	88567333	C	T	0.7487	not_sig	0.0277462	0.00612911	0.0164503	0.00555893	0.171023	not_sig	0.0320611	0.00701387	0.0212495	0.00593113	0.237897	not_sig
nonHDL	16	88567333	C	T	0.1119	not_sig	0.0294654	0.00639902	0.0124479	0.00585462	0.0491234	not_sig	0.0332384	0.00729496	0.0168606	0.00623926	0.0871088	not_sig
HDL	17	481604	C	T	0.4846	not_sig	-0.0154754	0.00435451	-0.013219	0.00403347	0.703049	not_sig	-0.0144254	0.00500295	-0.0135863	0.00434336	0.898933	not_sig
logTG	17	481604	C	T	0.1026	not_sig	0.0124675	0.00426167	0.0094323	0.00389768	0.598192	not_sig	0.0105523	0.00487619	0.00990892	0.00419031	0.920074	not_sig
logTG	17	1618363	T	C	0.7358	not_sig	0.0158856	0.00419014	0.0197735	0.00383762	0.492613	not_sig	0.017211	0.00480454	0.0207823	0.00412038	0.571529	not_sig
nonHDL	17	1622850	G	C	0.6109	not_sig	0.0115257	0.00388156	0.0117501	0.00356301	0.965946	not_sig	0.0116947	0.0044222	0.0124145	0.00379629	0.901436	not_sig
LDL	17	1958609	T	C	0.4283	not_sig	-0.00983106	0.00340754	-0.00749182	0.00309846	0.610531	not_sig	-0.0107788	0.00389032	-0.00718379	0.00330445	0.480035	not_sig
TC	17	1958609	T	C	0.3291	not_sig	-0.0131137	0.00341873	-0.00994277	0.00312601	0.492466	not_sig	-0.0139826	0.00388858	-0.0103871	0.00332457	0.480988	not_sig
HDL	17	2064702	A	T	0.2109	not_sig	-0.00575155	0.00360857	-0.00714217	0.00333066	0.776437	not_sig	-0.00437009	0.00414475	-0.00953953	0.00358354	0.344109	not_sig
HDL	17	3902650	T	A	0.6772	not_sig	-0.0100638	0.00360539	-0.0119634	0.00332884	0.69788	not_sig	-0.00972777	0.00415031	-0.00995985	0.00358048	0.966135	not_sig
LDL	17	4676420	G	A	0.2304	not_sig	0.0122415	0.00341619	0.0089417	0.00309551	0.472905	not_sig	0.0138361	0.00389904	0.0112749	0.00329892	0.615074	not_sig
logTG	17	4692640	G	T	0.01933	not_sig	-0.100551	0.0232924	-0.139025	0.0221758	0.230287	not_sig	-0.0839167	0.0261787	-0.163729	0.0236864	0.0233929	not_sig
nonHDL	17	4692640	G	T	0.8508	not_sig	-0.107316	0.0241546	-0.130662	0.0230372	0.483064	not_sig	-0.112909	0.0269973	-0.14606	0.0244592	0.361499	not_sig
TC	17	4692640	G	T	0.1521	not_sig	-0.100497	0.0232499	-0.128944	0.0221085	0.373953	not_sig	-0.111897	0.0259477	-0.142756	0.0233818	0.375647	not_sig
LDL	17	5270010	G	A	0.6905	not_sig	-0.0711579	0.0224681	-0.0876365	0.0217547	0.597243	not_sig	-0.0518816	0.0253794	-0.0990036	0.0230007	0.167715	not_sig
LDL	17	7069412	G	A	0.3072	not_sig	-0.31494	0.0218102	-0.344698	0.0201683	0.315116	not_sig	-0.334576	0.0243939	-0.337726	0.0210886	0.921961	not_sig
nonHDL	17	7069412	G	A	0.2832	not_sig	-0.288312	0.0226751	-0.327968	0.021259	0.20077	not_sig	-0.315569	0.0253408	-0.324397	0.0221997	0.792725	not_sig
TC	17	7069412	G	A	0.6458	not_sig	-0.261679	0.0218845	-0.282288	0.0203542	0.489266	not_sig	-0.298734	0.0243997	-0.290687	0.0212232	0.802969	not_sig
logTG	17	7106378	G	A	0.03941	not_sig	-0.0813467	0.0243595	-0.156153	0.0222657	0.0230266	not_sig	-0.101995	0.0271768	-0.139025	0.0233828	0.30034	not_sig
HDL	17	7462969	A	G	0.03736	not_sig	0.0138019	0.0040938	0.0216024	0.00378961	0.160867	not_sig	0.0127718	0.0047137	0.025135	0.00407139	0.046549	not_sig
LDL	17	7571080	A	G	0.9581	not_sig	-0.0160247	0.00453415	-0.0170325	0.00411544	0.868905	not_sig	-0.017629	0.00518389	-0.0167704	0.00439036	0.899148	not_sig
nonHDL	17	7571080	A	G	0.8505	not_sig	-0.0181969	0.00473699	-0.0182438	0.00433539	0.994159	not_sig	-0.0205494	0.00540019	-0.0188352	0.00462232	0.808918	not_sig
TC	17	7571080	A	G	0.3558	not_sig	-0.0194673	0.00454886	-0.0184691	0.00415219	0.870895	not_sig	-0.0216667	0.00518046	-0.0184965	0.00441723	0.640545	not_sig
HDL	17	8109598	G	A	0.3971	not_sig	-0.0144827	0.00343996	-0.00870147	0.00317372	0.215484	not_sig	-0.0139403	0.00395563	-0.00812149	0.00341243	0.264043	not_sig
LDL	17	8214427	G	A	0.01863	not_sig	0.00893001	0.00326014	0.00659277	0.0029568	0.594375	not_sig	0.00619024	0.00371974	0.00836843	0.00315195	0.654168	not_sig
TC	17	8216468	T	C	0.2179	not_sig	0.0110977	0.00326484	0.00811374	0.0029781	0.498337	not_sig	0.00845589	0.00371035	0.0104994	0.00316495	0.674355	not_sig
nonHDL	17	8219478	A	G	0.6153	not_sig	0.00828569	0.00342576	0.00841347	0.0031324	0.97798	not_sig	0.00705636	0.00389681	0.0105521	0.0033352	0.494353	not_sig
LDL	17	9791780	T	A	0.5575	not_sig	0.00741682	0.00346037	0.00956053	0.00313903	0.645436	not_sig	0.00762958	0.00394791	0.00995966	0.00334982	0.651795	not_sig
TC	17	9791780	T	A	0.6728	not_sig	0.00742966	0.00347206	0.0120204	0.00316685	0.327294	not_sig	0.00803798	0.00394618	0.013079	0.00337012	0.330023	not_sig
logTG	17	17456746	G	A	0.02713	not_sig	0.0233219	0.00686897	0.0440947	0.006244	0.0248345	not_sig	0.0228988	0.00784808	0.0474903	0.00673038	0.0170739	not_sig
HDL	17	17483297	G	A	0.1436	not_sig	-0.0185878	0.00708979	-0.0370218	0.00652369	0.0550305	not_sig	-0.0218049	0.0081288	-0.0378861	0.00704175	0.133773	not_sig
nonHDL	17	17634550	C	T	0.2458	not_sig	-0.00997955	0.00416583	-0.0112371	0.00380832	0.823212	not_sig	-0.00807855	0.0047372	-0.0104416	0.00405365	0.703905	not_sig
TC	17	18112675	C	T	0.09484	not_sig	0.0153731	0.00415003	0.00813961	0.00380683	0.19774	not_sig	0.0173838	0.00471624	0.0101111	0.00404981	0.240745	not_sig
LDL	17	18116455	C	T	0.3023	not_sig	0.0148863	0.00419694	0.00855512	0.00382521	0.263564	not_sig	0.0160851	0.00478807	0.00985673	0.00408069	0.320834	not_sig
LDL	17	18679442	G	A	0.9489	not_sig	0.00821706	0.00363121	0.00282219	0.00330648	0.270655	not_sig	0.00579466	0.00414199	0.0043065	0.00352601	0.783829	not_sig
TC	17	21281466	A	G	0.7254	not_sig	-0.00673044	0.00340773	-0.00348496	0.0031114	0.480641	not_sig	-0.00765747	0.00387353	-0.0045465	0.00330777	0.540255	not_sig
LDL	17	26694861	G	A	0.2587	not_sig	0.015597	0.0032512	0.012038	0.0029542	0.416562	not_sig	0.0168861	0.00370883	0.0106815	0.00315023	0.201057	not_sig
logTG	17	26694861	G	A	0.0915	not_sig	-0.00708888	0.00326948	-0.0107992	0.00298892	0.400966	not_sig	-0.00666234	0.00374204	-0.0120474	0.00320989	0.273393	not_sig
nonHDL	17	26694861	G	A	0.5221	not_sig	0.0123098	0.00339524	0.0105601	0.00311319	0.703285	not_sig	0.0131474	0.00386361	0.00983018	0.00331838	0.513687	not_sig
HDL	17	26721895	G	A	0.4417	not_sig	-0.00806764	0.00336754	-0.00916125	0.00311466	0.81105	not_sig	-0.00753245	0.00387052	-0.00894385	0.00334885	0.782148	not_sig
TC	17	27035335	A	G	0.4202	not_sig	-0.0133714	0.00578916	-0.0274753	0.00529162	0.0713548	not_sig	-0.020547	0.00655645	-0.027515	0.0056167	0.418331	not_sig
nonHDL	17	27645258	G	A	0.7483	not_sig	-0.0127885	0.00488409	-0.0209316	0.00447283	0.217583	not_sig	-0.0152401	0.00555553	-0.0214082	0.00475405	0.397623	not_sig
TC	17	27648542	G	A	0.5228	not_sig	-0.0150505	0.00469333	-0.0233568	0.00429382	0.190399	not_sig	-0.0156112	0.00533207	-0.0250202	0.00455499	0.1785	not_sig
logTG	17	27889643	C	T	0.0003612	not_sig	0.028019	0.0123175	0.0379148	0.0113114	0.55293	not_sig	0.0254942	0.014064	0.0431673	0.0122363	0.341789	not_sig
LDL	17	28583498	C	G	0.8144	not_sig	-0.0166155	0.00595071	-0.0130216	0.00540304	0.653891	not_sig	-0.0174421	0.00678891	-0.0127247	0.00575771	0.59514	not_sig
TC	17	28640992	G	C	0.2878	not_sig	-0.00454671	0.00363667	-0.00782816	0.00331919	0.503935	not_sig	-0.00394243	0.00413426	-0.00782612	0.00353048	0.47379	not_sig
nonHDL	17	29410944	A	G	0.2879	not_sig	0.0169084	0.00370948	0.0152169	0.00340619	0.736271	not_sig	0.0156919	0.00421836	0.0139763	0.00362607	0.757119	not_sig
LDL	17	29413614	G	A	0.2173	not_sig	0.015466	0.00353673	0.0135621	0.00321822	0.689694	not_sig	0.0137145	0.00403283	0.0124425	0.00342851	0.809581	not_sig
TC	17	29413614	G	A	0.2425	not_sig	0.0162298	0.0035493	0.0155089	0.00324729	0.880554	not_sig	0.015359	0.00403197	0.0141633	0.00344994	0.821232	not_sig
nonHDL	17	32893285	A	T	0.3133	not_sig	-0.389678	0.112834	-0.232784	0.0919328	0.279734	not_sig	-0.274921	0.135547	-0.223916	0.0970732	0.759045	not_sig
logTG	17	34841617	G	T	0.2123	not_sig	0.00577715	0.00327699	0.00578995	0.00299427	0.997693	not_sig	0.0056457	0.00375302	0.00592673	0.00321381	0.954518	not_sig
nonHDL	17	34946547	T	C	0.6343	not_sig	-0.00160204	0.00339975	-0.0020871	0.00311571	0.915998	not_sig	-0.00224236	0.00387076	-0.00390224	0.00331965	0.744117	not_sig
nonHDL	17	37067261	T	C	0.6667	not_sig	-0.00426231	0.00360361	-0.00881975	0.00330489	0.349969	not_sig	-0.00414245	0.00410127	-0.00947872	0.00352144	0.322233	not_sig
LDL	17	37070737	A	G	0.6673	not_sig	-0.00368215	0.00343986	-0.00922186	0.00312761	0.232145	not_sig	-0.00476238	0.00392474	-0.00915422	0.00333548	0.39254	not_sig
TC	17	37070737	A	G	0.4328	not_sig	-0.00398594	0.0034512	-0.00816817	0.00315559	0.369821	not_sig	-0.0048967	0.00392316	-0.00828515	0.00335599	0.510454	not_sig
HDL	17	37810218	C	G	0.007715	not_sig	0.0290628	0.00354154	0.0220673	0.00327658	0.145966	not_sig	0.0318623	0.00406788	0.022639	0.00352335	0.0856915	not_sig
TC	17	37893484	C	T	0.01365	not_sig	0.0153038	0.00340119	0.00965079	0.00310438	0.218321	not_sig	0.0155882	0.00386296	0.00659045	0.00330008	0.0757583	not_sig
LDL	17	37970365	C	T	0.08623	not_sig	-0.0209602	0.00606859	-0.0100146	0.00550471	0.180369	not_sig	-0.0165441	0.00689732	-0.00517837	0.00588104	0.208624	not_sig
HDL	17	38505824	C	G	0.7662	not_sig	-0.012809	0.00379929	-0.0123878	0.00351829	0.934984	not_sig	-0.017218	0.00436982	-0.0137372	0.00378422	0.545969	not_sig
nonHDL	17	39967442	T	C	0.4036	not_sig	-0.00926254	0.00356347	-0.00905936	0.00326989	0.966396	not_sig	-0.00777833	0.00405626	-0.00729321	0.0034841	0.927513	not_sig
HDL	17	40359483	G	A	0.6383	not_sig	-0.0667628	0.0406183	-0.0532524	0.037449	0.806286	not_sig	-0.0856583	0.0461265	-0.058766	0.0402856	0.659702	not_sig
TC	17	40536804	G	C	0.1461	not_sig	-0.00968789	0.00387557	-0.0075248	0.00353807	0.679356	not_sig	-0.0102784	0.00440532	-0.00936283	0.003762	0.874086	not_sig
LDL	17	40546652	G	A	0.6274	not_sig	-0.00654548	0.00332121	-0.00829754	0.00301628	0.695352	not_sig	-0.00767833	0.00379018	-0.0080952	0.00321458	0.932968	not_sig
nonHDL	17	40598129	G	A	0.7839	not_sig	0.0152607	0.00398397	0.011951	0.00364339	0.53872	not_sig	0.0173939	0.00453416	0.0114403	0.00388279	0.317278	not_sig
logTG	17	40731597	T	A	0.7424	not_sig	0.0147228	0.00361935	0.0153348	0.00330404	0.900341	not_sig	0.0178621	0.00414403	0.0173774	0.00355071	0.929024	not_sig
HDL	17	41166479	TTC	T	0.4751	not_sig	-0.0608135	0.0145526	-0.0753058	0.0135672	0.465128	not_sig	-0.0584156	0.0168241	-0.0811905	0.0146254	0.30562	not_sig
logTG	17	41387617	A	G	0.6426	not_sig	0.0106651	0.00332005	0.00506847	0.00304538	0.212879	not_sig	0.00923194	0.00379905	0.00584131	0.00327117	0.497654	not_sig
HDL	17	41926126	C	T	1.78e-05	sig	-0.174	0.00952996	-0.138353	0.00873771	0.00586732	not_sig	-0.180234	0.0110039	-0.143786	0.00939959	0.0115554	not_sig
LDL	17	41926126	C	T	0.134	not_sig	-0.0169733	0.00926699	-0.00651293	0.00837131	0.400945	not_sig	-0.0250676	0.010621	-0.00163532	0.00892914	0.0903887	not_sig
logTG	17	41926126	C	T	0.07458	not_sig	0.133055	0.00931634	0.118223	0.00846967	0.237477	not_sig	0.131287	0.0107112	0.122666	0.00909819	0.538435	not_sig
TC	17	41926126	C	T	0.6878	not_sig	-0.0378547	0.00928925	-0.0376041	0.0084462	0.984033	not_sig	-0.0428581	0.0106038	-0.0339723	0.00898387	0.521447	not_sig
logTG	17	42626279	G	A	0.9328	not_sig	0.0579491	0.0254228	0.0482757	0.022934	0.77694	not_sig	0.0560892	0.0288529	0.0383497	0.0246128	0.63904	not_sig
TC	17	45008742	G	C	0.05119	not_sig	0.00538267	0.00341903	0.00659811	0.00312714	0.792516	not_sig	0.00632675	0.0038863	0.00520866	0.00332649	0.82652	not_sig
HDL	17	45024027	G	A	0.1517	not_sig	0.00967062	0.00351209	0.00370226	0.0032477	0.210881	not_sig	0.0117842	0.00403665	0.00381104	0.00349402	0.134249	not_sig
TC	17	45650196	T	C	3.05e-06	sig	-0.0155	0.00326692	-0.0293693	0.00298059	0.0017257	not_sig	-0.0204295	0.00371277	-0.0321	0.0031692	0.0168	not_sig
nonHDL	17	45653291	T	G	2.93e-06	sig	-0.0165	0.00340163	-0.0292144	0.0031148	0.0058627	not_sig	-0.0206459	0.0038697	-0.0317	0.00331868	0.0294	not_sig
logTG	17	45697549	C	G	0.09949	not_sig	0.00262618	0.00327065	5.09e-05	0.00298	0.559713	not_sig	0.000701757	0.00374335	-0.00150983	0.00320468	0.652683	not_sig
LDL	17	45732605	G	A	9.38e-06	sig	-0.0175	0.00325511	-0.0288899	0.00295343	0.0094795	not_sig	-0.0213295	0.00371315	-0.0316	0.00314894	0.0347	not_sig
HDL	17	45737275	A	T	0.1051	not_sig	-0.00311555	0.00335421	-0.00796856	0.00310004	0.286657	not_sig	-0.00565147	0.00385542	-0.00884633	0.00333366	0.529637	not_sig
logTG	17	46197755	A	G	0.4517	not_sig	0.0153673	0.00383173	0.013388	0.0034985	0.702079	not_sig	0.0139453	0.00438212	0.0126769	0.00375451	0.825559	not_sig
HDL	17	46272609	A	G	0.8866	not_sig	0.0215047	0.00658635	0.0200235	0.00608807	0.868469	not_sig	0.0234721	0.00756584	0.0212809	0.00653839	0.826079	not_sig
TC	17	46529501	T	C	0.6326	not_sig	-0.0139397	0.00353465	-0.0153406	0.00322789	0.769161	not_sig	-0.0171275	0.00400965	-0.0144596	0.00342852	0.612097	not_sig
LDL	17	46657927	G	A	0.08174	not_sig	0.00758797	0.00342952	0.0121746	0.00311245	0.320665	not_sig	0.00796765	0.00390856	0.0132927	0.00331755	0.297627	not_sig
nonHDL	17	46661292	G	A	0.09852	not_sig	0.00799144	0.00357871	0.0132189	0.0032758	0.279942	not_sig	0.00880185	0.0040679	0.0148953	0.00348851	0.254204	not_sig
HDL	17	47060322	C	A	0.197	not_sig	0.00984668	0.0035926	0.00560204	0.00332002	0.384236	not_sig	0.0115118	0.00412087	0.00556795	0.00356886	0.274254	not_sig
logTG	17	47450775	G	A	0.9787	not_sig	0.0116404	0.00329627	0.0155021	0.00300537	0.385328	not_sig	0.0141609	0.00377869	0.0160918	0.00322677	0.696777	not_sig
logTG	17	48624523	A	C	0.3527	not_sig	-0.0102904	0.0033856	-0.0107824	0.00309404	0.914329	not_sig	-0.0119686	0.00387384	-0.0119622	0.00332237	0.998995	not_sig
TC	17	49252238	T	C	0.134	not_sig	-0.00334105	0.00369323	-0.00551223	0.00337304	0.663354	not_sig	-0.00528349	0.0042002	-0.00625898	0.00358076	0.859332	not_sig
nonHDL	17	49328705	T	C	0.6983	not_sig	0.00771051	0.00389893	0.00628084	0.00356412	0.786088	not_sig	0.00909241	0.00443662	0.00621088	0.00379237	0.620559	not_sig
logTG	17	49338257	C	T	0.2988	not_sig	-0.00547172	0.00512414	-0.0119391	0.00467875	0.349978	not_sig	-0.00683026	0.00586095	-0.0105723	0.00501358	0.626611	not_sig
HDL	17	53400110	T	C	0.2267	not_sig	0.0115152	0.00353225	0.00739354	0.00326147	0.389962	not_sig	0.00958184	0.00405855	0.00552648	0.00350589	0.448308	not_sig
logTG	17	55210713	A	G	0.3058	not_sig	-0.00479733	0.00345381	-0.0103234	0.00315254	0.236015	not_sig	-0.0031025	0.00395314	-0.00978451	0.00338479	0.197926	not_sig
TC	17	56409956	T	C	0.9242	not_sig	-0.0243189	0.00616147	-0.0131491	0.00559162	0.178249	not_sig	-0.025195	0.00698776	-0.0141698	0.00593461	0.227856	not_sig
logTG	17	57925649	A	G	0.04511	not_sig	0.0184139	0.00397637	0.00916472	0.0036522	0.0858241	not_sig	0.0154536	0.00455067	0.0107589	0.00392114	0.433218	not_sig
LDL	17	57926911	T	C	0.0069	not_sig	-0.00996209	0.00326224	-0.003116	0.0029671	0.119521	not_sig	-0.00914219	0.00372524	-0.00316377	0.00316374	0.219977	not_sig
TC	17	57926911	T	C	0.1007	not_sig	-0.00946025	0.00327315	-0.00264109	0.00299387	0.123186	not_sig	-0.00833032	0.00372372	-0.00299823	0.00318337	0.275097	not_sig
HDL	17	57932314	T	A	0.002719	not_sig	-0.0181162	0.00406488	-0.00385626	0.00377465	0.0099431	not_sig	-0.0157028	0.00467266	-0.00510412	0.0040576	0.0859142	not_sig
HDL	17	61887693	C	T	0.5792	not_sig	0.00501275	0.00343061	0.00500624	0.00317075	0.998885	not_sig	0.00654917	0.00394584	0.00218282	0.00341034	0.401182	not_sig
LDL	17	64210580	A	C	0.6393	not_sig	0.0666277	0.00954356	0.0683106	0.00871278	0.896101	not_sig	0.0778285	0.0109499	0.0711534	0.00935399	0.642089	not_sig
logTG	17	64210580	A	C	0.0003098	not_sig	-0.0728655	0.0096013	-0.0419065	0.00881516	0.0172289	not_sig	-0.0686489	0.0110546	-0.041	0.00953029	0.0575	not_sig
nonHDL	17	64224775	C	T	0.1089	not_sig	0.0441327	0.0100785	0.0534816	0.00923716	0.492882	not_sig	0.0536405	0.0115433	0.059999	0.00990609	0.675096	not_sig
TC	17	64224775	C	T	0.3471	not_sig	0.0516996	0.00963151	0.0519938	0.00884205	0.981998	not_sig	0.0618414	0.0110122	0.0568218	0.00946451	0.728861	not_sig
nonHDL	17	65109591	T	G	0.2245	not_sig	0.00971254	0.00340624	0.00653381	0.00312453	0.490441	not_sig	0.0112592	0.00387297	0.00866233	0.00332986	0.61017	not_sig
TC	17	65123352	C	A	0.08999	not_sig	0.00875726	0.00326409	0.00451167	0.00298362	0.335692	not_sig	0.0106632	0.00370711	0.00693341	0.00317272	0.443387	not_sig
LDL	17	65140921	A	C	0.08315	not_sig	0.0103053	0.00326123	0.00580268	0.00296536	0.305677	not_sig	0.0125308	0.00371884	0.00795547	0.0031626	0.34732	not_sig
logTG	17	65272255	G	A	0.04217	not_sig	0.0067637	0.00352586	0.00448279	0.00322953	0.632392	not_sig	0.00477109	0.00403871	0.00581886	0.00346754	0.843533	not_sig
LDL	17	65839210	A	G	0.1421	not_sig	0.0127024	0.00410319	0.0177305	0.0037296	0.363193	not_sig	0.0101722	0.0046856	0.0152118	0.00398438	0.41129	not_sig
nonHDL	17	65839210	A	G	0.655	not_sig	0.0174337	0.00428327	0.0193514	0.00392919	0.740774	not_sig	0.0146787	0.00487924	0.0173525	0.00419476	0.676917	not_sig
TC	17	65839210	A	G	0.2225	not_sig	0.0113918	0.00411716	0.0158089	0.00376236	0.4271	not_sig	0.0096959	0.00468374	0.0141111	0.00400821	0.472648	not_sig
HDL	17	65938655	G	A	0.9221	not_sig	0.011014	0.00421484	0.0104337	0.00390307	0.919318	not_sig	0.0114288	0.00485057	0.00986221	0.00420535	0.806686	not_sig
logTG	17	65980289	G	A	0.3426	not_sig	-0.0230671	0.00406249	-0.0195159	0.00371128	0.517528	not_sig	-0.0214858	0.0046546	-0.0177154	0.00399344	0.537585	not_sig
LDL	17	66394054	T	C	0.7079	not_sig	0.0124933	0.0038324	0.0122727	0.00347604	0.96589	not_sig	0.0143971	0.00436921	0.0133843	0.00370503	0.859296	not_sig
HDL	17	66879927	C	T	0.187	not_sig	-0.0506819	0.0069441	-0.0369792	0.00644775	0.147042	not_sig	-0.0560716	0.00800262	-0.0386687	0.00695296	0.0997393	not_sig
LDL	17	67081278	A	G	0.9726	not_sig	0.179957	0.010847	0.144026	0.0098459	0.0139111	not_sig	0.201014	0.0126272	0.145334	0.0106039	0.000709193	not_sig
logTG	17	67081278	A	G	0.263	not_sig	-0.0293649	0.0109141	-0.0409945	0.00995996	0.429957	not_sig	-0.03957	0.0127493	-0.0449639	0.0108023	0.746187	not_sig
nonHDL	17	67081278	A	G	0.1237	not_sig	0.160399	0.0113329	0.129944	0.0103837	0.0469414	not_sig	0.18112	0.0131533	0.132657	0.0111636	0.00484978	not_sig
TC	17	67081278	A	G	0.3836	not_sig	0.151509	0.0108865	0.125943	0.00993283	0.0819259	not_sig	0.178036	0.0126268	0.132272	0.0106682	0.00550162	not_sig
LDL	17	68169005	A	G	0.4306	not_sig	0.0148832	0.00508361	0.0153452	0.00461287	0.946194	not_sig	0.0168787	0.00581101	0.0134001	0.00492452	0.646991	not_sig
nonHDL	17	68169005	A	G	0.6203	not_sig	0.0182894	0.00530773	0.0192549	0.0048614	0.892995	not_sig	0.0189283	0.00604687	0.0169703	0.00518713	0.805343	not_sig
TC	17	68169005	A	G	0.8167	not_sig	0.0152338	0.00510104	0.0133093	0.00465389	0.779874	not_sig	0.0166792	0.00580861	0.0124097	0.00495427	0.574948	not_sig
logTG	17	68431026	C	T	0.1121	not_sig	-0.00729798	0.00327356	-0.0102383	0.00298973	0.506016	not_sig	-0.00681398	0.0037504	-0.00899814	0.00321095	0.657327	not_sig
HDL	17	68507436	T	C	0.1392	not_sig	0.00510547	0.00360034	0.011391	0.00333379	0.198956	not_sig	0.00605431	0.00414215	0.00840872	0.00358657	0.666549	not_sig
HDL	17	70295760	G	A	0.9183	not_sig	-0.00478118	0.00336919	-0.00731138	0.00311273	0.580172	not_sig	-0.0037648	0.00386725	-0.00701919	0.00334728	0.52345	not_sig
logTG	17	70295760	G	A	0.2028	not_sig	0.0098099	0.00329339	0.0078727	0.00300803	0.663185	not_sig	0.00964434	0.0037636	0.0074725	0.00322988	0.660578	not_sig
logTG	17	73272060	T	A	0.1209	not_sig	0.0105502	0.00360075	0.00679371	0.00329329	0.440142	not_sig	0.00884745	0.00412183	0.00755824	0.00353642	0.811855	not_sig
LDL	17	73767437	A	G	0.2604	not_sig	0.0129917	0.0036136	0.0121532	0.00328654	0.863327	not_sig	0.015607	0.0041161	0.0108313	0.00350008	0.37545	not_sig
nonHDL	17	73767437	A	G	0.1581	not_sig	0.0144144	0.0037759	0.012874	0.00346637	0.763138	not_sig	0.0172032	0.00428913	0.0121833	0.00368887	0.373583	not_sig
TC	17	73767437	A	G	0.05316	not_sig	0.0118468	0.00362568	0.0101428	0.00331585	0.728014	not_sig	0.0157758	0.00411438	0.00916846	0.00352144	0.221174	not_sig
HDL	17	74214276	C	T	0.2709	not_sig	-0.0126254	0.00617413	-0.0181313	0.0057824	0.513958	not_sig	-0.0126749	0.0071151	-0.0187045	0.006218	0.522258	not_sig
logTG	17	74268619	C	T	0.1639	not_sig	-0.0111259	0.00351887	-0.0149957	0.0032134	0.415461	not_sig	-0.0107652	0.00402703	-0.0169322	0.00344974	0.243532	not_sig
LDL	17	76387363	G	T	0.1032	not_sig	0.0137749	0.00328521	0.0140388	0.00298495	0.952464	not_sig	0.016022	0.00374885	0.0131766	0.00318391	0.561846	not_sig
nonHDL	17	76387363	G	T	0.4563	not_sig	0.0127489	0.00343268	0.0117175	0.00314661	0.824236	not_sig	0.0145559	0.00390587	0.0109172	0.00335328	0.478468	not_sig
TC	17	76387363	G	T	0.7643	not_sig	0.0185661	0.0032961	0.0189576	0.00301165	0.929933	not_sig	0.0201387	0.00374704	0.0181916	0.00320344	0.692064	not_sig
HDL	17	76394042	G	A	0.1495	not_sig	0.0285359	0.00342286	0.0202038	0.00316289	0.0730055	not_sig	0.0258357	0.00393475	0.0208302	0.00340177	0.334545	not_sig
logTG	17	76395750	C	T	0.5235	not_sig	-0.0180132	0.00334335	-0.0130349	0.00305606	0.270419	not_sig	-0.0164711	0.00382643	-0.0133619	0.00328231	0.536286	not_sig
logTG	17	80052073	A	G	0.5292	not_sig	-0.00678723	0.00329193	-0.0100072	0.00301286	0.469338	not_sig	-0.00694518	0.00376947	-0.00872745	0.00323501	0.719007	not_sig
TC	17	81011652	T	C	0.8408	not_sig	0.0131766	0.00449114	0.0121717	0.00410496	0.86846	not_sig	0.00927971	0.00511327	0.0135636	0.00436746	0.522956	not_sig
HDL	18	287534	G	A	0.3106	not_sig	0.0213485	0.00648276	0.0212574	0.00602128	0.991757	not_sig	0.0303487	0.007452	0.0228367	0.00647629	0.445483	not_sig
logTG	18	293519	G	A	0.7968	not_sig	-0.0243367	0.00589742	-0.0167683	0.00541184	0.343039	not_sig	-0.0342133	0.00675455	-0.0214952	0.00581327	0.152413	not_sig
logTG	18	2846812	A	T	0.02903	not_sig	-0.00921681	0.00346597	-0.0101901	0.00316436	0.83527	not_sig	-0.0100245	0.00396874	-0.0103296	0.00339857	0.95331	not_sig
HDL	18	2987038	C	T	0.4431	not_sig	-0.00762159	0.0037372	-0.0106638	0.00346342	0.549356	not_sig	-0.00758757	0.00430401	-0.00961733	0.00372391	0.720629	not_sig
TC	18	2989738	G	A	0.7918	not_sig	-0.00450721	0.00334932	-0.00715169	0.003066	0.559218	not_sig	-0.00432681	0.00381448	-0.00829211	0.00325905	0.428056	not_sig
LDL	18	9545961	C	T	0.6367	not_sig	0.00897178	0.00407291	0.0105356	0.0037092	0.775901	not_sig	0.00701605	0.00464886	0.0123535	0.00395339	0.380475	not_sig
TC	18	9545961	C	T	0.5943	not_sig	0.00908483	0.00408581	0.0121021	0.00374227	0.585003	not_sig	0.00840499	0.00464569	0.0129259	0.00397759	0.458547	not_sig
logTG	18	13725674	C	A	0.03908	not_sig	-0.00987038	0.00345435	-0.00702577	0.00315153	0.541842	not_sig	-0.0112815	0.00395176	-0.0076039	0.00338405	0.478447	not_sig
logTG	18	19905141	C	T	0.414	not_sig	-0.0124958	0.00328413	-0.00909783	0.00300266	0.443845	not_sig	-0.013599	0.00376029	-0.00960102	0.00322323	0.418249	not_sig
HDL	18	20070591	C	T	0.44	not_sig	-0.00398265	0.00380232	-0.0101307	0.00352591	0.234478	not_sig	-0.00521211	0.0043709	-0.0113115	0.00378911	0.290368	not_sig
nonHDL	18	21113285	T	C	0.7692	not_sig	-0.0105659	0.00340276	-0.00795881	0.00311094	0.570683	not_sig	-0.00743978	0.00387529	-0.00803026	0.00331538	0.907574	not_sig
HDL	18	21143739	T	G	0.3045	not_sig	0.0131967	0.00334914	0.00958867	0.00309052	0.427241	not_sig	0.0106555	0.0038536	0.00745058	0.00332463	0.527758	not_sig
logTG	18	21143739	T	G	0.06389	not_sig	-0.0104286	0.00327248	-0.0133569	0.00298679	0.507487	not_sig	-0.00803798	0.00374931	-0.0124208	0.00320857	0.373156	not_sig
HDL	18	29772887	T	C	0.1825	not_sig	-0.957921	0.293223	-0.221532	0.232875	0.0486177	not_sig	-1.02268	0.308993	-0.230985	0.234105	0.0405887	not_sig
logTG	18	29772887	T	C	0.1033	not_sig	0.590871	0.28664	0.0356856	0.228812	0.129056	not_sig	0.546295	0.31278	0.0203498	0.229764	0.174219	not_sig
HDL	18	40705900	A	G	0.944	not_sig	0.0109848	0.00346304	0.00614832	0.00320565	0.304076	not_sig	0.0121697	0.00397588	0.00693757	0.0034482	0.318814	not_sig
TC	18	42062380	A	C	0.05855	not_sig	-0.00402684	0.00485675	-0.0139573	0.00443951	0.130188	not_sig	-0.00765761	0.00549731	-0.0123135	0.00471255	0.519074	not_sig
logTG	18	42599167	G	A	0.01608	not_sig	0.00743033	0.00356629	0.00670278	0.00326163	0.880008	not_sig	0.00818237	0.00408487	0.00756064	0.00350052	0.907739	not_sig
HDL	18	45692874	C	T	0.04739	not_sig	0.486687	0.219681	0.00667511	0.200785	0.105807	not_sig	0.501055	0.243932	0.154124	0.216182	0.28582	not_sig
HDL	18	46545976	G	C	0.05655	not_sig	0.151782	0.0171333	0.134445	0.0158319	0.456106	not_sig	0.170169	0.0198467	0.143618	0.0170683	0.309125	not_sig
LDL	18	46545976	G	C	0.01992	not_sig	0.0871175	0.0166348	0.0559807	0.0151517	0.16525	not_sig	0.0948798	0.0191502	0.0549207	0.01618	0.109988	not_sig
nonHDL	18	46545976	G	C	0.009702	not_sig	0.09381	0.0174047	0.0589715	0.0159336	0.138738	not_sig	0.093746	0.0199553	0.056531	0.0170202	0.154792	not_sig
TC	18	46545976	G	C	0.3334	not_sig	0.138365	0.0166906	0.113203	0.015281	0.264846	not_sig	0.144833	0.0191539	0.111805	0.0162724	0.187583	not_sig
LDL	18	47109955	A	G	0.2491	not_sig	0.0715956	0.0139774	0.0674172	0.0129126	0.825723	not_sig	0.0837111	0.0160113	0.0637444	0.0138302	0.343988	not_sig
nonHDL	18	47109955	A	G	0.02679	not_sig	0.0841847	0.014608	0.0774201	0.0136062	0.734009	not_sig	0.0870547	0.0166838	0.0705188	0.0145896	0.454366	not_sig
TC	18	47109955	A	G	0.387	not_sig	0.146886	0.0140176	0.159431	0.0130236	0.510869	not_sig	0.15781	0.0159984	0.157856	0.0139096	0.998253	not_sig
HDL	18	47181668	A	T	0.4731	not_sig	0.0647175	0.00436989	0.062387	0.00403833	0.694491	not_sig	0.0697093	0.00501855	0.0662604	0.00433467	0.602004	not_sig
TC	18	47632322	T	C	0.7687	not_sig	0.0977821	0.0172832	0.0639807	0.0159972	0.150075	not_sig	0.0968596	0.0196878	0.058383	0.0170679	0.138675	not_sig
HDL	18	48211367	C	T	0.9881	not_sig	0.0170193	0.0336179	-0.027359	0.0310264	0.330668	not_sig	0.0104461	0.0389615	-0.0238513	0.0332282	0.501822	not_sig
HDL	18	50285398	C	T	0.058	not_sig	-0.0172688	0.00484167	-0.00865909	0.00448408	0.190777	not_sig	-0.0169736	0.00557466	-0.00611715	0.00482037	0.13963	not_sig
nonHDL	18	55322011	C	T	0.7319	not_sig	0.0137257	0.00514078	0.0164767	0.00471386	0.69246	not_sig	0.010028	0.00584534	0.0147858	0.00502511	0.535966	not_sig
LDL	18	55322502	C	T	0.1675	not_sig	0.01444	0.00491846	0.0162753	0.00447036	0.781853	not_sig	0.0111119	0.00560847	0.0159554	0.00476957	0.509455	not_sig
TC	18	55322502	C	T	0.3904	not_sig	0.0154668	0.00493487	0.0182483	0.0045097	0.676516	not_sig	0.0122028	0.00560584	0.0170329	0.00479861	0.511596	not_sig
logTG	18	56089858	G	T	0.8575	not_sig	0.055687	0.0156812	0.0647069	0.0144029	0.670979	not_sig	0.0696066	0.0180753	0.056993	0.0155247	0.595532	not_sig
HDL	18	56118358	C	T	0.7115	not_sig	-0.063208	0.0153593	-0.0643575	0.0143111	0.95621	not_sig	-0.0770736	0.0177313	-0.0711368	0.0154193	0.8	not_sig
HDL	18	57829135	T	C	0.001895	not_sig	-0.0163618	0.00395931	-0.0170122	0.00364675	0.903561	not_sig	-0.0164361	0.00456382	-0.0179	0.00392331	0.803	not_sig
logTG	18	57861961	G	A	0.7368	not_sig	0.0124722	0.00370067	0.00836448	0.00337415	0.410783	not_sig	0.0116275	0.00424191	0.00798119	0.00362365	0.512224	not_sig
HDL	18	60845884	T	C	0.1973	not_sig	0.00977396	0.00345066	0.00480624	0.00318902	0.289051	not_sig	0.00881548	0.00396228	0.00313984	0.00342771	0.277349	not_sig
logTG	18	60845884	T	C	0.2691	not_sig	-0.0103952	0.00337449	-0.0100475	0.00308281	0.939194	not_sig	-0.00964861	0.00385916	-0.0103968	0.00330947	0.882673	not_sig
LDL	18	61034420	T	G	0.4293	not_sig	-0.0113819	0.00399704	-0.0111728	0.00363284	0.969034	not_sig	-0.0129661	0.00455473	-0.0123098	0.00387304	0.912351	not_sig
LDL	18	77825981	A	G	0.343	not_sig	0.00798229	0.00362726	0.00573593	0.0032957	0.645784	not_sig	0.0116664	0.00414195	0.00598443	0.00351674	0.294363	not_sig
nonHDL	18	77880802	G	A	0.4743	not_sig	-0.0140369	0.00515291	-0.0106545	0.00472059	0.627429	not_sig	-0.0194719	0.00588155	-0.0116478	0.00503766	0.311004	not_sig
LDL	19	795816	G	A	0.5152	not_sig	0.00847627	0.00472495	0.00636014	0.00429123	0.739546	not_sig	0.010946	0.00540137	0.00611176	0.00457272	0.493369	not_sig
nonHDL	19	795816	G	A	0.2745	not_sig	0.00968938	0.00494124	0.00610809	0.00451572	0.591617	not_sig	0.0107884	0.00563552	0.00678398	0.00480857	0.587806	not_sig
logTG	19	808742	G	T	0.8239	not_sig	0.00872256	0.00474381	0.0088976	0.00433674	0.978213	not_sig	0.0130758	0.0054397	0.0102631	0.00465374	0.693593	not_sig
TC	19	1171020	A	G	0.09787	not_sig	-0.0100501	0.00425095	-0.0120812	0.00387492	0.723273	not_sig	-0.00861988	0.00482208	-0.0104329	0.0041187	0.774358	not_sig
nonHDL	19	2786397	C	G	0.06599	not_sig	0.0159737	0.00377295	0.00970762	0.00346322	0.219865	not_sig	0.0193246	0.00429547	0.0107818	0.00369166	0.130418	not_sig
LDL	19	2789337	T	C	0.1881	not_sig	0.0155836	0.0036017	0.00923819	0.00327792	0.191364	not_sig	0.0182545	0.00411223	0.00951599	0.00349716	0.104539	not_sig
TC	19	2793194	A	C	0.1667	not_sig	0.0175213	0.0036129	0.0131322	0.00330615	0.368806	not_sig	0.0210296	0.00410923	0.0139448	0.00351727	0.18904	not_sig
[truncated: 278 more rows]
