# Supplementary material for: Implicating genes, pleiotropy, and sexual dimorphism at blood lipid loci through multi-ancestry meta-analysis
Source: Genome Biol. 2022 Dec 27;23:268. doi: 10.1186/s13059-022-02837-1 (PMC9793579; doi:10.1186/s13059-022-02837-1)
Supplement: Supplementary file 28 — Additional file 28: Table S18. Sex-participation association of the variants with significant sex-specific lipid results. [file 13059_2022_2837_MOESM28_ESM.xlsx]

## Sheet: Sheet1
Table S18. Sex-participation association of the variants with significant sex-specific lipid results
Variant	sex_gwas_p_value
1:107551018:CA:C	0.047
1:107607037:T:G	0.014
1:10796866:T:C	0.42
1:109310728:G:A	0.036
1:109817192:A:G	0.38
1:109817590:G:T	0.4
1:110326545:G:A	0.11
1:110470764:G:A	0.049
1:114489689:T:C	0.88
1:118172538:A:G	0.22
1:120484718:T:C	0.27
1:12518739:A:G	0.48
1:145472741:C:A	0.87
1:149899389:G:A	0.44
1:149992277:T:C	0.48
1:150842696:C:T	0.49
1:150958836:A:G	0.92
1:151064116:A:G	0.72
1:151658543:G:A	0.14
1:154243457:A:T	0.24
1:154251626:A:G	0.89
1:154555733:A:T	0.079
1:155033334:G:A	0.27
1:155106054:A:G	0.00017
1:155123837:G:C	0.012
1:155178782:A:T	0.015
1:156705822:C:T	0.52
1:158586966:A:T	0.37
1:158607935:T:G	0.24
1:15914648:G:A	0.73
1:161078909:T:C	0.59
1:161531340:G:A	0.47
1:161614490:T:G	0.059
1:16508059:G:A	0.019
1:16510894:C:T	0.037
1:172357433:T:C	0.032
1:172361977:T:G	0.026
1:174168805:G:T	0.61
1:174538958:C:G	0.31
1:177885762:G:A	0.63
1:177938437:G:A	0.91
1:178533832:G:T	0.49
1:182150978:C:A	0.096
1:182165484:G:A	0.087
1:183065406:A:G	0.16
1:1831012:C:T	0.017
1:183112041:G:C	0.48
1:183115018:C:T	0.58
1:184035116:A:G	0.87
1:184865132:T:A	0.17
1:18802825:G:A	0.71
1:18808526:A:C	0.69
1:197129981:C:T	0.92
1:197159347:G:A	0.93
1:198990494:G:A	0.044
1:199010721:C:T	0.036
1:200049302:T:A	0.19
1:202184600:C:T	0.19
1:202197659:C:T	0.12
1:203255493:T:A	0.21
1:203517292:A:G	0.91
1:203518873:A:C	0.99
1:205070573:G:A	0.6
1:205099959:C:A	0.97
1:205114873:C:G	0.66
1:205677148:A:G	0.6
1:20916080:C:G	0.95
1:209849714:TA:T	0.84
1:212537553:G:A	0.69
1:2147162:T:C	0.038
1:219664627:G:A	0.56
1:219673705:A:G	0.93
1:219734960:A:C	0.86
1:220970028:A:G	0.056
1:224544746:G:A	0.89
1:224545410:T:C	0.34
1:224549524:T:C	0.33
1:224646328:C:T	0.45
1:228056868:T:C	0.54
1:230294715:C:A	0.12
1:230307222:T:G	0.39
1:230796872:CAT:C	0.76
1:230823363:A:G	0.9
1:2326009:G:A	0.38
1:234848712:G:A	0.39
1:234852760:C:T	0.44
1:234853268:A:C	0.37
1:234853406:A:G	0.37
1:23734350:A:C	0.095
1:23747996:GA:G	0.26
1:23769359:T:C	0.7
1:23784965:A:G	0.61
1:23785760:C:T	0.62
1:246892695:G:A	0.25
1:25049949:A:G	0.85
1:25760920:C:T	0.3
1:25764177:A:G	0.34
1:25768937:A:G	0.34
1:26232356:C:A	0.37
1:26512556:C:T	0.1
1:27021913:G:C	0.088
1:27180088:A:C	0.054
1:27668610:C:T	0.19
1:27688814:C:T	0.21
1:28319484:A:G	0.26
1:2975119:C:G	0.85
1:36021738:T:C	0.26
1:39312160:G:A	0.21
1:39438889:T:C	0.82
1:39451488:A:G	0.94
1:40035928:G:T	0.66
1:45494828:C:G	0.54
1:45810865:G:A	0.41
1:49204135:G:A	NA
1:49263479:G:A	NA
1:51209148:T:C	0.39
1:52262405:A:G	NA
1:54246772:T:C	NA
1:54824117:G:A	0.64
1:54890956:T:G	0.84
1:55505647:G:T	0.76
1:56105434:C:G	NA
1:56840574:A:C	NA
1:56983585:G:A	0.25
1:57851746:G:A	0.53
1:57872099:T:C	NA
1:61684630:G:A	0.84
1:61692655:T:C	0.62
1:61865627:C:T	0.41
1:62920008:A:G	0.85
1:63050598:T:G	0.84
1:63107526:C:T	0.84
1:63433116:G:A	0.74
1:63679932:A:C	NA
1:64576995:C:T	0.51
1:66098653:T:C	0.3
1:66130398:A:G	0.73
1:66133443:A:T	0.74
1:71397835:A:G	0.4
1:71428732:A:C	0.23
1:72754788:T:C	0.48
1:72835410:C:T	0.61
1:78070458:C:T	0.46
1:85721911:T:C	0.5
1:914852:G:C	0.046
1:91533297:A:G	0.27
1:92946479:G:A	0.74
1:92971951:T:C	0.62
1:93130268:C:T	0.82
1:93850283:C:A	0.25
1:93860625:G:A	0.47
1:98395881:G:T	0.33
10:101912194:C:T	0.15
10:102003906:G:C	0.21
10:102075479:G:A	0.99
10:104142294:G:A	0.44
10:113934384:G:C	0.21
10:113940329:T:C	0.24
10:113949664:T:C	0.22
10:114711983:A:G	0.65
10:115786233:G:A	0.73
10:115798268:TAA:T	0.78
10:115805056:G:C	0.092
10:118397894:A:G	0.41
10:118398046:C:A	0.52
10:118407116:T:A	0.35
10:120493295:G:A	0.98
10:121582556:T:C	0.028
10:121641900:G:A	0.076
10:122853958:T:G	0.26
10:122929493:T:C	0.94
10:124693587:G:T	0.45
10:126733319:A:G	0.94
10:134459388:A:G	0.39
10:135436812:CGCTTTCCTCTCT:C	0.019
10:13574659:G:C	0.45
10:17259642:C:G	0.85
10:17265447:T:C	0.86
10:33630848:A:G	0.37
10:33633866:G:A	0.36
10:43918823:T:A	0.43
10:45953767:A:G	0.27
10:45957247:C:CA	0.11
10:45958856:G:C	0.085
10:46026107:G:A	0.12
10:5247302:T:C	0.53
10:52573772:C:T	0.17
10:5257647:G:A	0.48
10:5267191:A:G	0.65
10:54533360:A:G	0.8
10:54534837:A:T	0.88
10:61409469:G:A	0.91
10:61469090:C:T	0.43
10:63837006:G:A	0.98
10:63837016:C:T	0.98
10:64988931:A:T	0.84
10:65128619:G:A	0.97
10:65191645:G:T	0.83
10:70409357:T:C	0.15
10:71094504:T:C	0.51
10:71941078:A:G	0.052
10:74665640:C:A	0.38
10:74666065:G:A	0.32
10:74710484:G:C	0.36
10:74712546:T:C	0.38
10:76861680:T:C	0.39
10:77257376:T:C	0.76
10:8089033:A:G	0.45
10:80954251:G:A	0.99
10:8099021:T:C	0.28
10:81074125:T:A	0.65
10:81094251:A:C	0.32
10:82284512:A:T	0.57
10:89805410:C:A	0.73
10:91002804:C:T	0.92
10:91010157:A:G	0.79
10:91011692:T:G	0.76
10:93575831:G:A	0.52
10:93622950:TGTTTTTTCA:T	0.55
10:94215014:C:CTTGA	0.37
10:94274809:A:G	0.54
10:94839642:G:A	0.067
10:94839724:G:T	0.064
10:95340811:T:G	0.56
10:95342772:A:T	0.13
10:96015793:C:G	0.93
10:96023077:T:C	0.94
10:96032866:T:C	0.28
10:96038686:G:A	0.99
11:10381766:A:T	0.065
11:103870621:ATCTTG:A	0.71
11:103870755:G:C	0.59
11:103873662:A:C	0.46
11:10665235:C:T	0.93
11:1081287:G:A	0.29
11:109957826:G:A	0.99
11:109966513:A:C	0.45
11:111623694:A:AAAAC	0.66
11:111861156:C:T	0.2
11:113579598:C:T	0.1
11:114850006:C:T	1
11:116014665:C:T	NA
11:116139965:C:T	0.58
11:116648917:G:C	0.2
11:117220429:A:C	0.048
11:117849058:C:G	NA
11:118122491:T:C	0.64
11:118449370:A:G	0.25
11:118449396:G:A	0.21
11:118449746:C:T	0.23
11:118928249:G:A	0.075
11:118980039:C:T	0.7
11:119834755:G:T	0.48
11:120559994:C:A	NA
11:12071547:A:G	0.39
11:12071855:A:G	0.18
11:121330087:A:G	0.77
11:121801129:T:C	0.12
11:122517803:A:G	0.67
11:122523596:G:A	0.77
11:122527120:G:A	0.71
11:126225876:C:G	0.9
11:126238633:T:C	0.6
11:13355770:C:T	0.77
11:13361524:C:T	0.79
11:13970901:G:T	0.42
11:14012524:T:C	0.37
11:14865399:C:T	0.47
11:17299762:A:G	0.36
11:18643559:G:A	0.96
11:18645668:T:C	0.99
11:26197972:A:T	0.048
11:27675712:C:T	0.13
11:27690399:C:T	0.14
11:29200527:T:C	0.77
11:2936657:G:A	0.88
11:2942593:G:A	0.88
11:30402714:G:A	0.034
11:32470828:C:T	0.24
11:36328427:T:TA	0.47
11:380315:C:T	0.2
11:45913607:G:A	0.64
11:46241757:C:T	0.4
11:46349696:G:T	0.47
11:47272579:A:G	0.64
11:47278917:C:T	0.64
11:47974373:A:C	0.84
11:48021778:A:G	0.59
11:4993424:T:A	0.3
11:5248004:G:A	NA
11:56119093:T:C	0.35
11:56225592:G:A	0.98
11:56652022:G:A	0.51
11:5701074:C:A	0.49
11:57119156:T:C	0.029
11:58162382:G:A	0.77
11:60152584:G:A	0.41
11:6092869:G:A	0.32
11:61588305:A:G	0.28
11:62378221:A:G	0.59
11:63615561:T:C	0.66
11:63659778:C:T	0.37
11:63669411:G:A	0.56
11:64004723:G:C	0.011
11:64162955:G:A	0.28
11:65351074:G:A	0.91
11:65405600:G:T	0.8
11:65473798:C:A	0.72
11:65570517:C:T	0.52
11:66066993:G:T	0.9
11:66272976:C:A	0.2
11:66288123:T:C	0.2
11:66302743:C:T	0.18
11:67372946:G:A	0.48
11:68597886:G:T	0.21
11:68613864:C:T	0.5
11:69305417:A:G	0.4
11:75455309:A:G	0.2
11:75474195:C:A	0.29
11:76156973:G:A	0.27
11:77198233:T:C	0.19
11:78072383:T:C	0.18
11:78072875:A:T	0.19
11:823586:C:G	0.32
11:95298828:T:A	0.026
11:95311260:T:G	0.017
12:100836797:T:C	0.21
12:101867997:G:A	0.22
12:102806305:C:T	0.56
12:105606068:G:C	0.051
12:107100717:T:C	0.98
12:107199142:G:A	0.64
12:109057037:A:T	0.046
12:109100503:C:T	0.01
12:109152649:C:T	0.051
12:109156737:T:C	0.048
12:109171697:T:A	0.061
12:109709680:G:T	0.51
12:109876128:C:T	0.69
12:109920071:G:T	0.89
12:109998097:A:G	0.9
12:110000193:C:T	0.9
12:111344621:G:T	0.86
12:111702646:A:G	0.8
12:111884608:T:C	0.64
12:112007756:C:T	0.77
12:113218868:G:A	0.76
12:113409176:G:A	0.53
12:120859188:T:G	0.66
12:121406293:G:A	0.15
12:121416650:A:C	0.48
12:121416988:A:G	0.29
12:122370206:T:C	0.033
12:122380274:A:G	0.034
12:122381427:C:A	0.24
12:122963550:C:T	0.19
12:123203258:T:G	0.47
12:123804721:G:C	0.23
12:123825339:A:G	0.24
12:123856974:G:A	0.23
12:123895906:G:C	0.64
12:124409502:G:A	0.015
12:124492610:T:G	0.012
12:124560456:G:T	0.48
12:125265201:G:A	0.72
12:125312425:G:C	0.66
12:125325010:C:G	0.49
12:133065832:A:G	0.21
12:133140329:C:G	0.74
12:13345397:T:G	0.11
12:16503789:T:G	0.86
12:20470199:A:G	0.52
12:20470221:A:C	0.53
12:21343833:A:C	0.51
12:22747967:T:G	0.19
12:25408464:A:G	0.16
12:25409070:T:C	0.33
12:26440698:G:A	0.92
12:26472562:A:G	0.81
12:26803949:T:C	0.32
12:2908330:C:A	0.95
12:29491528:A:G	0.59
12:29496991:C:T	0.58
12:29508642:A:G	0.43
12:33588388:T:C	0.95
12:40565161:A:C	0.7
12:40580318:T:C	0.82
12:4384844:T:G	0.91
12:4388084:C:G	0.64
12:46224063:A:G	0.71
12:46322449:C:T	0.69
12:48143315:A:G	0.29
12:49399132:G:C	0.86
12:50127304:ATAATAT:A	0.81
12:50263148:G:A	0.54
12:508859:G:T	0.66
12:51103633:C:T	0.95
12:51211692:A:G	0.6
12:51779544:AG:A	0.53
12:51783420:T:A	0.95
12:51788340:T:C	0.93
12:53265945:C:T	0.076
12:53443278:T:G	0.29
12:53793314:C:A	0.64
12:53796744:T:C	0.89
12:53796754:G:A	0.96
12:53801461:C:A	0.56
12:56470625:C:T	0.6
12:56941146:C:A	0.85
12:57313335:T:A	0.71
12:57645789:T:A	0.013
12:57692470:C:T	0.054
12:57823585:A:C	0.1
12:58256010:T:C	0.56
12:623129:A:G	0.21
12:62838230:C:T	0.92
12:63503447:C:T	0.19
12:66206798:T:C	0.42
12:66260924:A:G	0.81
12:6713450:A:G	0.45
12:6739497:T:C	0.09
12:67689927:TA:T	0.69
12:69722880:T:C	0.15
12:69868820:CAT:C	0.74
12:72179446:C:T	0.043
12:7625014:T:C	0.52
12:7681181:T:G	0.84
12:89674799:T:C	0.84
12:89874816:CAGGGCCTAATTGTT:C	0.031
12:89885473:T:C	0.0028
12:89921860:A:T	0.038
12:9082581:A:G	0.57
12:92802078:T:C	0.58
12:92819139:A:C	0.61
13:108960380:TGCTG:T	0.32
13:110411642:A:C	0.47
13:111033821:C:A	0.25
13:111038379:T:C	0.53
13:111039070:A:G	0.25
13:113927208:G:T	0.83
13:114551993:T:C	0.86
13:23908034:A:G	0.78
13:28604007:T:C	0.38
13:28687084:T:C	0.42
13:29145323:A:C	0.087
13:31001091:AT:A	0.45
13:31005142:T:C	0.41
13:31010795:C:A	0.46
13:32444439:T:C	0.78
13:32445660:T:C	0.78
13:32976656:GC:G	0.67
13:41635301:C:G	0.81
13:45492138:G:T	0.84
13:45970147:A:G	0.63
13:50048401:C:CA	0.98
13:50104386:A:G	0.026
13:50655989:G:T	0.69
13:50707087:G:C	0.65
13:51151633:G:A	0.96
13:51172963:G:A	0.95
13:51214613:A:G	0.97
13:58391491:T:C	0.0003
13:74748606:G:A	0.84
13:95226210:G:C	0.088
13:95258944:T:C	0.55
14:100359294:T:C	0.19
14:100765823:T:C	0.45
14:101194561:A:G	0.7
14:102622225:C:T	0.38
14:102675350:G:C	0.3
14:103307655:G:C	0.51
14:104293533:T:C	0.071
14:105258437:G:T	0.42
14:21492229:G:A	0.032
14:23685442:G:A	0.82
14:24560159:A:G	0.64
14:24871926:C:T	0.23
14:24872209:T:C	0.53
14:31725111:G:A	0.59
14:31727404:G:GT	0.59
14:31735087:G:T	0.66
14:33175822:G:A	0.019
14:35186694:C:T	0.89
14:38848824:T:A	0.058
14:39766074:C:T	0.69
14:50655357:G:C	0.28
14:52470889:A:G	0.49
14:52493161:T:C	0.51
14:60749118:G:C	0.02
14:64233980:C:T	0.11
14:64236157:A:G	0.096
14:64239351:T:C	0.093
14:64239629:T:G	0.096
14:65870594:G:T	0.73
14:69149372:A:G	0.78
14:69285264:G:A	0.63
14:70833819:C:G	0.9
14:70846954:T:C	0.79
14:70847103:A:G	0.86
14:70857022:C:T	0.74
14:74250126:T:C	0.003
14:75293374:A:G	0.12
14:75299101:G:A	0.1
14:75326771:C:T	0.01
14:75327443:T:C	0.01
14:79939993:G:A	0.4
14:81701004:T:C	0.8
14:89804507:T:C	0.25
14:89804856:G:A	0.17
14:90048934:T:C	0.14
14:90058243:G:A	0.14
14:92504973:T:TA	0.35
14:94847262:T:A	0.5
15:102068658:G:A	0.12
15:23932467:G:A	0.96
15:31637666:T:C	0.32
15:39447529:A:G	0.13
15:40400195:T:C	0.49
15:40616986:T:C	0.39
15:40751555:C:A	0.3
15:41057507:C:T	0.78
15:41880619:A:G	0.64
15:41888918:A:G	0.45
15:43820717:C:T	0.47
15:44027885:T:C	0.53
15:45001900:A:G	0.19
15:49336477:T:A	0.6
15:49527624:T:C	0.5
15:50993673:TAAAA:T	0.024
15:53001538:T:C	0.67
15:53096084:C:G	0.45
15:53739426:A:C	0.35
15:57254842:T:A	0.27
15:57297078:A:T	0.18
15:57920703:A:G	0.71
15:58680178:T:C	0.021
15:58722590:G:GC	0.34
15:58723426:A:G	0.5
15:58723939:G:A	0.43
15:59277019:T:C	0.34
15:59780362:C:G	NA
15:61947280:C:G	0.11
15:61952501:G:A	0.14
15:63344167:A:G	0.86
15:63788267:T:C	0.81
15:63791063:T:C	0.33
15:63793238:T:G	0.29
15:63910433:G:T	0.5
15:66872114:C:T	0.71
15:66877172:G:A	0.091
15:67428014:C:A	0.68
15:68014971:C:T	0.59
15:70182851:A:G	0.32
15:70189590:A:C	0.44
15:72543084:G:A	0.1
15:73091283:G:T	0.25
15:73431600:T:G	0.43
15:75116167:C:T	0.25
15:75125645:A:C	0.18
15:89086653:A:T	0.86
15:90214777:A:G	0.13
15:96714816:C:A	0.69
15:99281192:C:T	0.34
16:1012393:T:C	0.78
16:11464263:G:A	0.075
16:11706100:G:A	0.39
16:11839326:G:T	0.034
16:1374951:C:G	0.065
16:14395073:TG:T	0.43
16:15150505:C:A	0.15
16:15172118:T:C	0.13
16:19935389:G:A	0.27
16:19967822:C:T	0.29
16:21089905:G:T	0.36
16:2146288:C:T	0.17
16:2163962:A:G	0.69
16:28865916:G:A	0.052
16:28899411:C:T	0.048
16:29994922:C:T	0.67
16:30995528:A:G	0.079
16:31021880:G:T	0.043
16:31049155:A:G	0.017
16:31110981:G:A	0.071
16:31378235:A:G	0.84
16:4014282:C:G	0.72
16:4677604:C:A	0.26
16:49886366:T:C	0.2
16:53126338:C:T	0.15
16:53806453:A:G	1.5e-05
16:53811788:A:G	2.4e-05
16:54820862:T:A	NA
16:55349464:T:C	NA
16:55870239:G:T	0.18
16:55872708:G:A	NA
16:56393734:CCT:C	0.68
16:56990716:C:A	0.38
16:56991363:C:T	0.35
16:57551366:C:T	0.38
16:63630178:G:A	NA
16:66071124:G:C	NA
16:67928042:G:A	0.24
16:67973171:C:T	0.31
16:67985706:C:T	0.34
16:68866671:C:G	NA
16:69160925:A:G	0.48
16:69376269:G:A	0.53
16:69527385:A:G	0.83
16:69686912:A:G	0.028
16:70375296:G:A	0.15
16:72079657:C:T	0.45
16:72101525:C:G	0.5
16:72108093:G:A	0.57
16:72847307:A:G	NA
16:73095270:CTT:C	0.93
16:73101013:G:A	0.78
16:75205213:A:G	0.25
16:76458533:G:A	NA
16:79363079:A:C	0.19
16:79739978:G:C	0.22
16:81524274:A:C	0.97
16:81534790:T:C	0.8
16:81683801:C:T	NA
16:83979317:T:C	0.86
16:85150163:A:G	0.97
16:85927519:C:G	0.61
16:86430254:A:G	0.24
16:86434553:T:C	0.34
16:88004092:A:G	0.042
16:88006065:T:C	0.065
16:88535407:C:G	0.71
16:88535670:C:T	0.85
16:88567333:C:T	0.69
16:962154:T:C	0.64
17:1618363:T:C	0.68
17:1622850:G:C	0.46
17:17456746:G:A	0.12
17:17483297:G:A	0.13
17:17634550:C:T	0.27
17:18112675:C:T	0.8
17:18116455:C:T	0.95
17:18679442:G:A	0.0012
17:1958609:T:C	0.91
17:2064702:A:T	0.88
17:21281466:A:G	0.095
17:26694861:G:A	0.6
17:26721895:G:A	0.82
17:27035335:A:G	0.95
17:27645258:G:A	0.2
17:27648542:G:A	0.2
17:27889643:C:T	0.23
17:28583498:C:G	1
17:28640992:G:C	0.68
17:29410944:A:G	0.76
17:29413614:G:A	0.85
17:32893285:A:T	NA
17:34841617:G:T	0.0049
17:34946547:T:C	0.011
17:37067261:T:C	0.29
17:37070737:A:G	0.24
17:37810218:C:G	0.2
17:37893484:C:T	0.52
17:37970365:C:T	0.85
17:38505824:C:G	0.39
17:3902650:T:A	0.7
17:39967442:T:C	0.34
17:40359483:G:A	0.81
17:40536804:G:C	0.87
17:40546652:G:A	0.85
17:40598129:G:A	0.55
17:40731597:T:A	0.58
17:41166479:TTC:T	0.76
17:41387617:A:G	0.55
17:41926126:C:T	0.3
17:42626279:G:A	0.38
17:45008742:G:C	0.57
17:45024027:G:A	0.58
17:45650196:T:C	0.7
17:45653291:T:G	0.71
17:45697549:C:G	0.52
17:45732605:G:A	0.71
17:45737275:A:T	0.67
17:46197755:A:G	0.95
17:46272609:A:G	0.9
17:46529501:T:C	0.93
17:46657927:G:A	0.28
17:46661292:G:A	0.39
17:4676420:G:A	0.77
17:4692640:G:T	0.053
17:47060322:C:A	0.8
17:47450775:G:A	0.076
17:481604:C:T	0.53
17:48624523:A:C	0.25
17:49252238:T:C	0.72
17:49328705:T:C	0.67
17:49338257:C:T	0.47
17:5270010:G:A	0.0012
17:53400110:T:C	0.053
17:55210713:A:G	0.86
17:56409956:T:C	0.072
17:57925649:A:G	0.0083
17:57926911:T:C	0.43
17:57932314:T:A	0.0098
17:61887693:C:T	0.16
17:64210580:A:C	0.45
17:64224775:C:T	0.44
17:65109591:T:G	0.87
17:65123352:C:A	0.94
17:65140921:A:C	0.86
17:65272255:G:A	0.17
17:65839210:A:G	0.26
17:65938655:G:A	0.32
17:65980289:G:A	0.23
17:66394054:T:C	0.33
17:66879927:C:T	0.47
17:67081278:A:G	0.99
17:68169005:A:G	0.11
17:68431026:C:T	0.017
17:68507436:T:C	0.31
17:70295760:G:A	0.0067
17:7069412:G:A	0.3
17:7106378:G:A	0.97
17:73272060:T:A	0.98
17:73767437:A:G	0.095
17:74214276:C:T	0.004
17:74268619:C:T	0.86
17:7462969:A:G	0.19
17:7571080:A:G	0.68
17:76387363:G:T	0.47
17:76394042:G:A	0.21
17:76395750:C:T	0.22
17:80052073:A:G	0.33
17:81011652:T:C	0.32
17:8109598:G:A	0.52
17:8214427:G:A	0.86
17:8216468:T:C	0.99
17:8219478:A:G	0.7
17:9791780:T:A	0.28
18:13725674:C:A	0.64
18:19905141:C:T	0.99
18:20070591:C:T	0.65
18:21113285:T:C	0.085
18:21143739:T:G	0.15
18:2846812:A:T	0.68
18:287534:G:A	0.16
18:293519:G:A	0.43
18:29772887:T:C	NA
18:2987038:C:T	0.23
18:2989738:G:A	0.35
18:40705900:A:G	0.31
18:42062380:A:C	0.97
18:42599167:G:A	0.44
18:45692874:C:T	NA
18:46545976:G:C	0.93
18:47109955:A:G	0.29
18:47181668:A:T	0.89
18:47632322:T:C	0.38
18:48211367:C:T	0.53
18:48712504:NA:NA	NA
18:50285398:C:T	0.27
18:55322011:C:T	0.97
18:55322502:C:T	0.97
18:56089858:G:T	0.22
18:56118358:C:T	0.25
18:57829135:T:C	0.91
18:57861961:G:A	0.68
18:60845884:T:C	0.96
18:61034420:T:G	0.92
18:77825981:A:G	0.5
18:77880802:G:A	0.22
18:9545961:C:T	0.69
19:10332988:C:T	0.16
19:11197598:G:T	0.9
19:11346155:G:A	0.29
19:11350874:C:T	NA
19:1171020:A:G	0.62
19:12295949:A:G	NA
19:12784944:C:T	NA
19:13295968:C:T	0.049
19:14172728:C:T	0.51
19:14172951:T:G	0.45
19:15796507:A:G	0.15
19:16404594:C:T	0.71
19:17252151:T:C	0.97
19:17462094:T:G	0.93
19:17527370:G:A	0.35
19:18334443:C:T	0.71
19:18335715:G:C	0.99
19:18520231:A:G	0.058
19:18597196:G:A	0.17
19:18735666:T:C	0.45
19:19379549:C:T	0.68
19:2786397:C:G	0.53
19:2789337:T:C	0.39
19:2793194:A:C	0.42
19:33751349:G:A	0.57
19:33803443:A:C	0.55
19:33864260:G:A	0.88
19:33894846:C:T	0.26
19:33896432:A:C	0.28
19:3414088:G:A	0.79
19:3474213:T:TCAGGGCTCAAAGTC	0.91
19:35487933:C:G	0.92
19:35551428:C:A	0.55
19:35553830:G:C	0.49
19:35693120:T:C	1
19:36038390:A:G	0.45
19:38444695:A:G	0.32
19:4028783:C:T	0.95
19:41353107:T:C	0.091
19:4147445:A:C	0.34
19:41754430:G:A	0.056
19:41826020:A:C	0.75
19:41969706:G:A	0.26
19:42584958:C:T	NA
19:42649075:T:C	NA
19:43234281:G:A	NA
19:43829420:A:C	NA
19:44153100:A:G	0.9
19:44296689:G:A	0.91
19:44356388:T:A	0.36
19:44388711:G:C	0.6
19:4478062:A:G	0.64
19:44890969:C:G	0.92
19:45411941:T:C	0.61
19:45412079:C:T	0.86
19:45416178:G:T	0.43
19:46018119:G:A	0.95
19:46385438:A:C	0.17
19:46854055:C:T	0.13
19:46887199:A:G	0.16
19:46896217:A:G	0.19
19:47220338:T:TCGG	0.3
19:47573527:A:G	0.098
19:47585240:A:G	0.076
19:47601215:C:T	0.37
19:48105080:T:C	0.26
19:48383542:C:A	0.9
19:49206462:C:T	0.2
19:49227443:C:T	0.12
19:49259529:A:G	0.082
19:4965064:G:A	0.023
19:4966041:C:T	0.15
19:50016759:C:T	0.91
19:50024391:A:G	0.59
19:50044741:C:G	0.49
19:52314655:G:C	0.43
19:53601172:C:T	0.18
19:54796719:C:G	0.78
19:54797848:C:T	0.63
19:54800500:A:G	0.62
19:56099951:G:A	0.96
19:56102362:G:A	0.91
19:56154339:C:T	0.094
19:57010947:T:G	0.65
19:57046007:T:C	0.7
19:57488423:C:T	0.21
19:57969606:C:T	0.94
19:5840926:C:A	0.29
19:58662235:C:T	0.12
19:58662254:T:C	0.12
19:7222655:C:T	0.3
19:7238681:C:T	0.95
19:7827576:T:C	0.27
19:7909765:G:A	0.61
19:7912816:C:T	0.31
19:795816:G:A	0.29
19:8022788:NA:NA	NA
19:808742:G:T	0.29
19:8429323:G:A	0.05
19:8441779:C:T	0.54
19:8945880:A:G	0.96
19:9901805:G:A	NA
2:100729293:T:C	0.06
2:101631888:C:G	0.53
2:109090267:G:C	0.33
2:109093836:A:G	0.33
2:109146017:T:A	0.41
2:111698040:A:C	0.42
2:111714577:C:T	0.98
2:111927379:A:G	0.46
2:112763640:C:G	0.96
2:113841030:A:G	1
2:113842506:T:C	0.89
2:113867288:T:C	0.85
2:118843158:G:A	0.28
2:119749146:C:G	0.25
2:121306440:G:A	0.6
2:121309231:C:G	0.61
2:121347612:G:C	0.94
2:122797791:C:G	NA
2:134874008:A:G	0.13
2:135014116:G:A	0.66
2:135954797:T:C	0.31
2:136602491:T:G	0.84
2:136898078:A:G	0.21
2:144248762:G:A	0.8
2:146347459:A:G	0.083
2:146353184:T:A	0.12
2:158434569:C:T	0.77
2:158481992:A:G	0.73
2:158508271:T:C	0.45
2:158514969:T:C	0.81
2:161118687:T:C	0.1
2:162966841:C:A	0.53
2:163110536:A:G	0.73
2:165508389:C:T	0.27
2:165518799:C:G	0.0042
2:165528876:C:T	0.24
2:16890382:C:G	0.48
2:169700838:C:A	0.8
2:169830661:G:A	0.26
2:169831376:G:T	0.27
2:169832362:G:A	0.28
2:171635168:G:A	0.92
2:174075761:G:A	0.83
2:17967586:A:G	0.68
2:180707310:T:C	0.72
2:188292458:C:T	0.094
2:191566439:A:G	0.84
2:19693384:A:G	NA
2:202185132:A:G	0.94
2:202223566:A:G	0.98
2:202314833:C:T	0.95
2:203271267:T:C	0.65
2:203431804:A:G	0.83
2:203460202:TGGCTCACGCCTGTA:T	0.24
2:203495058:G:A	0.076
2:203497786:A:C	0.11
2:20370641:A:C	0.097
2:20371380:G:A	0.1
2:20371772:G:A	0.15
2:20372409:G:A	0.15
2:208372913:T:G	0.057
2:208429351:T:C	0.98
2:211540507:C:A	0.62
2:212274447:G:A	0.46
2:21231524:G:A	0.38
2:21267461:G:A	0.36
2:215377588:A:T	0.54
2:216300185:C:T	0.49
2:216300482:T:A	0.55
2:21778585:A:G	0.83
2:21818551:NA:NA	NA
2:219138170:T:G	0.36
2:219142773:C:T	0.66
2:219155907:A:T	0.75
2:219162720:C:CA	0.77
2:21942500:G:C	NA
2:219699999:G:A	0.23
2:21979516:G:A	0.94
2:22445083:NA:NA	NA
2:22501253:T:G	0.077
2:227094758:A:G	0.99
2:227101309:T:C	0.93
2:227103717:A:C	0.94
2:227605895:T:C	0.67
2:228451050:G:A	0.69
2:228565656:G:A	0.5
2:230019348:G:A	0.41
2:23015285:C:T	0.65
2:23117602:NA:NA	NA
2:234144942:C:T	0.9
2:234512095:C:T	0.32
2:234679549:T:C	0.73
2:23882347:G:A	0.5
2:239597:C:G	0.82
2:242395674:G:A	0.54
2:24400769:A:C	0.4
2:24726602:GT:G	0.082
2:25592918:T:C	0.85
2:256116:G:T	0.78
2:26256840:A:C	0.99
2:26358156:A:G	0.64
2:26571411:G:A	0.56
2:26911509:A:C	0.24
2:26923568:T:C	0.26
2:26924018:C:G	0.23
2:26929282:T:G	0.26
2:27730940:T:C	0.18
2:29133905:C:G	0.81
2:30480750:T:G	0.19
2:32182528:T:C	0.11
2:3636478:T:G	0.86
2:3640142:C:T	0.98
2:3642361:T:C	0.91
2:42590122:C:G	0.064
2:43455654:T:C	0.9
2:43490619:A:T	0.89
2:43561161:C:A	0.53
2:44074431:C:T	0.78
2:44663206:T:A	0.051
2:44663302:C:T	0.014
2:46166321:A:G	0.62
2:48962291:G:T	0.65
2:54033988:C:G	0.48
2:58772377:T:A	0.26
2:58950363:G:T	0.29
2:59293596:C:A	0.89
2:61563408:G:A	0.026
2:61577435:T:C	0.021
2:61735446:C:T	0.64
2:62939397:G:A	0.42
2:62959308:T:A	0.27
2:62978981:G:T	0.25
2:64913045:C:G	0.91
2:64923808:C:T	0.72
2:65284231:A:T	0.97
2:65296280:T:C	0.83
2:65601600:C:A	0.23
2:66665146:T:C	0.11
2:66677881:G:T	0.079
2:70233392:C:T	0.81
2:70449776:A:G	0.48
2:70471899:A:G	0.51
2:70511784:G:T	0.48
2:71648425:G:T	0.73
2:72329685:C:T	0.38
2:85542718:G:A	0.99
2:85874044:C:T	0.86
2:85879041:G:T	0.5
2:86859298:A:C	0.78
2:8718961:G:A	0.9
2:8723673:G:A	0.68
2:88428571:C:T	0.66
2:88438050:C:A	0.59
20:12959885:A:G	0.55
20:12966089:T:G	0.54
20:17596155:C:A	0.067
20:17844684:G:T	0.16
20:21951847:A:G	0.014
20:25207931:A:G	0.079
20:25263136:T:C	0.45
20:25534854:C:T	0.36
20:30202961:T:C	0.88
20:30207659:T:G	0.89
20:31335978:T:C	0.21
20:32308275:C:T	0.038
20:32952125:G:A	0.77
20:34131396:C:T	0.41
20:34136791:C:T	0.41
20:34160840:G:A	0.33
20:38620281:T:C	0.42
20:38624741:A:G	0.58
20:39179822:G:C	0.056
20:39754695:C:G	0.48
20:39760448:C:G	0.48
20:39856080:A:C	0.46
20:399761:G:A	0.54
20:402710:A:G	0.82
20:42294613:T:C	0.66
20:42315091:G:A	0.7
20:43034079:G:A	0.6
20:43042364:C:T	0.039
20:43965903:A:G	0.69
20:44551855:T:C	0.31
20:44552895:C:A	0.82
20:44736371:TA:T	0.95
20:45594711:G:A	0.1
20:45602638:G:A	0.13
20:46340596:T:C	0.55
20:47541517:G:A	0.71
20:47582884:G:A	0.69
20:47701765:T:C	0.7
20:51033910:T:G	0.66
20:51588847:T:C	0.057
20:52532637:G:C	0.13
20:52535287:T:C	0.085
20:52535400:C:T	0.084
20:5547384:C:T	0.69
20:5572957:T:C	0.99
20:55836040:G:A	0.075
20:56118666:T:C	0.54
20:569164:C:T	0.52
20:61341472:G:A	0.45
20:62711459:C:T	0.97
20:62712053:T:C	0.67
21:16340289:C:T	0.8
21:16586682:T:A	0.14
21:30741454:A:G	0.47
21:33089703:A:C	0.42
21:33112255:G:T	0.33
21:33119592:G:C	0.31
21:40554355:C:A	0.81
21:40690561:G:T	0.99
21:40709617:A:AT	0.89
21:40716136:C:A	0.77
21:42622479:A:G	0.95
21:42653567:T:C	0.47
21:43721337:T:G	0.32
21:46271452:C:T	0.31
21:46875775:G:A	NA
21:46897079:A:G	0.32
21:46898174:T:C	0.21
21:47401057:NA:NA	NA
22:17625915:G:A	0.1
22:18481857:C:T	0.56
22:19949013:C:T	0.93
22:19950235:C:T	0.87
22:21916272:C:A	0.082
22:21920817:G:C	0.18
22:21921686:G:T	0.14
22:21939675:G:T	0.12
22:21958872:T:G	0.13
22:24265659:C:T	0.23
22:29130012:T:C	0.52
22:29130300:C:T	0.52
22:29963508:C:T	0.024
22:30151700:A:G	0.77
22:30529960:T:G	0.13
22:30575749:T:C	0.12
22:30914473:G:T	0.12
22:31507049:A:G	0.29
22:31551160:C:T	0.14
22:35685048:A:G	0.12
22:35689415:G:T	0.16
22:35707236:G:A	0.14
22:36042986:C:T	0.94
22:36425023:G:A	0.65
22:36545826:T:C	0.14
22:37462936:A:G	0.21
22:38555193:C:A	0.98
22:38594668:G:A	0.83
22:38599978:G:A	0.94
22:39133803:C:T	0.46
22:39139913:C:T	0.27
22:41181336:G:A	0.55
22:41227086:C:G	0.22
22:41249522:A:G	0.22
22:42538514:T:TC	0.96
22:42538670:G:T	0.92
22:44324730:C:T	0.67
22:44324855:G:A	0.69
22:45996298:A:G	0.62
22:46623905:C:T	0.072
22:46645148:G:A	0.069
22:46687681:G:C	0.13
22:46730338:C:G	0.54
22:50165082:G:A	0.79
22:50746706:C:T	0.7
22:50837224:A:G	0.28
22:50840573:G:A	0.22
3:100465609:A:G	0.52
3:114753078:A:C	0.31
3:11886116:C:T	0.38
3:119529113:G:T	0.046
3:119536429:G:A	0.85
3:122285218:CT:C	0.33
3:12266855:G:A	0.6
3:123065778:A:G	0.28
3:123068744:C:T	0.37
3:12327431:T:G	0.25
3:12360494:C:T	0.084
3:12383714:G:A	0.041
3:12445807:C:A	0.38
3:124959834:C:T	0.56
3:126058362:A:G	0.52
3:126060315:T:C	0.49
3:127281890:G:A	0.92
3:127292333:G:A	0.69
3:12793024:G:A	0.94
3:12856856:A:G	0.37
3:129274936:A:G	0.37
3:129278182:A:G	0.35
3:129296847:A:G	0.97
3:132119691:A:T	0.97
3:132183991:G:A	0.18
3:133478557:T:G	0.93
3:133490334:A:C	0.43
3:135932359:C:T	0.42
3:135956305:A:C	0.33
3:136020541:T:C	0.5
3:136450593:C:T	0.59
3:142019751:A:G	0.041
3:142078759:C:T	0.033
3:142159885:G:A	0.033
3:142649110:C:G	0.12
3:142660706:G:A	0.17
3:145924454:C:A	0.16
3:147076791:T:G	0.34
3:150066540:T:A	0.72
3:152016969:C:T	0.78
3:153851061:A:G	0.39
3:155532694:A:T	0.11
3:155535351:G:C	0.038
3:155546124:C:T	0.37
3:155560978:T:C	0.1
3:156244888:C:T	0.22
3:15667215:C:A	0.11
3:156797941:T:C	0.93
3:15782711:A:C	0.67
3:160028014:T:C	0.23
3:160029964:G:C	0.23
3:160063356:A:C	0.24
3:170727218:G:A	0.96
3:170732300:G:A	0.74
3:170732945:A:G	1
3:170758329:T:G	0.81
3:171536255:T:G	0.7
3:171959684:A:G	0.32
3:172294500:G:A	0.061
3:185820283:A:G	0.49
3:185824004:T:C	0.49
3:195298892:T:C	0.15
3:195942080:T:TG	0.46
3:196198533:T:C	0.34
3:23368583:G:A	0.59
3:24302811:G:A	0.77
3:24520283:A:G	0.047
3:32514647:T:A	0.48
3:32533010:C:T	0.4
3:36960660:C:A	0.38
3:37025661:T:C	0.89
3:47045846:C:T	0.62
3:4762734:A:T	0.37
3:47955346:GT:G	0.41
3:49145304:A:G	0.91
3:50038664:G:A	0.0062
3:50219991:C:G	0.28
3:50374293:A:G	0.026
3:52063885:C:T	0.22
3:52124388:C:T	0.29
3:52346240:T:G	0.87
3:52558133:T:C	0.52
3:52572056:A:G	0.36
3:52584787:T:C	0.23
3:52838654:C:T	0.094
3:57533658:C:T	0.35
3:57596105:T:C	0.15
3:58391293:C:G	0.39
3:62459819:A:C	0.44
3:66868609:C:T	0.77
3:66874481:A:C	0.93
3:69803691:T:A	0.62
3:69837571:C:G	0.11
3:69870595:A:G	0.18
3:70508703:G:C	0.67
3:71532738:C:T	0.5
3:87037543:A:G	0.92
3:9498143:G:A	0.59
4:100045616:C:T	0.6
4:100239319:T:C	0.0012
4:100465173:G:A	0.18
4:100488580:G:C	0.26
4:100495817:T:C	0.26
4:103188709:C:T	0.00023
4:103766720:G:A	0.96
4:103861380:A:G	0.94
4:106064683:G:A	0.28
4:106081636:T:C	0.04
4:110095620:T:C	0.56
4:110638824:C:T	0.58
4:110942277:G:C	0.28
4:120114100:C:G	0.6
4:120128060:A:C	0.61
4:124641827:A:G	0.027
4:128662796:C:T	0.83
4:128999619:C:T	0.91
4:141801478:T:C	0.67
4:143319721:C:T	0.017
4:143326714:T:G	0.024
4:148985862:T:C	0.69
4:15028043:G:C	0.39
4:151199080:G:A	0.72
4:151206057:G:T	0.22
4:154191226:G:A	0.088
4:154208278:C:T	0.23
4:155489608:C:T	0.3
4:157682598:T:C	0.33
4:157697086:A:G	0.96
4:17880416:A:C	0.92
4:17884986:T:C	0.81
4:17957688:T:A	0.66
4:185251995:A:T	0.2
4:2260812:T:C	0.93
4:26047616:A:G	0.8
4:26098810:G:A	0.29
4:2888622:G:A	0.47
4:3241845:C:T	0.53
4:3443931:A:G	0.7
4:39698824:G:A	0.58
4:45186139:G:A	0.0041
4:4990298:A:G	0.75
4:54453676:T:C	0.47
4:55498781:CG:C	0.52
4:55530748:ATTATTTAT:A	0.81
4:69339933:A:G	0.48
4:69491284:A:T	0.58
4:69588052:C:T	0.98
4:70117093:C:T	0.21
4:70264840:A:G	0.14
4:71297926:C:T	0.47
4:71820941:G:A	0.27
4:7219933:T:G	0.66
4:7222253:G:A	0.54
4:7223319:T:G	0.75
4:72754788:A:C	NA
4:73491622:G:A	NA
4:74033564:G:C	NA
4:74512280:G:A	NA
4:74793806:G:A	NA
4:75180409:T:C	0.77
4:75416194:T:C	NA
4:75684215:C:T	0.83
4:76572191:A:C	0.93
4:76650443:C:T	0.081
4:76740008:A:G	0.11
4:77420407:A:G	0.75
4:77421345:C:T	0.54
4:77439399:A:C	0.065
4:83907105:G:A	0.8
4:87294293:C:A	0.73
4:87985166:C:T	0.75
4:87996745:G:A	0.67
4:88050554:G:A	0.7
4:88052219:T:C	0.69
4:88053085:C:T	0.65
4:89724963:C:G	0.88
4:89730074:C:T	0.86
4:951947:T:C	0.55
4:965720:A:G	0.16
4:99713350:C:T	0.011
4:99788480:C:T	0.87
5:107316915:G:A	0.88
5:112304202:T:G	0.92
5:112379659:T:C	0.87
5:118729327:A:G	0.057
5:122833667:C:T	0.036
5:127357526:C:T	0.83
5:127453735:T:A	0.91
5:1284135:C:T	0.62
5:129196638:T:A	0.27
5:131008194:T:C	0.85
5:131781288:A:C	0.37
5:131797547:A:G	0.57
5:131807624:G:A	0.24
5:132444128:G:A	0.39
5:134136333:C:T	0.095
5:134444982:C:A	0.87
5:139527721:G:A	0.68
5:139651321:T:C	0.55
5:139664820:T:C	0.49
5:140063891:AAAAC:A	0.51
5:141542219:G:GA	0.75
5:141707225:A:G	0.8
5:141888881:C:T	0.053
5:141911176:G:A	0.04
5:148844793:G:T	0.72
5:149353598:A:G	0.86
5:149443298:C:T	0.71
5:153444950:A:G	0.57
5:155581796:A:G	NA
5:156391628:T:C	0.89
5:158011435:G:C	0.4
5:158020425:A:G	0.45
5:158622532:C:A	0.7
5:170612546:G:A	0.13
5:172591337:T:G	0.17
5:173356752:G:C	0.61
5:176522036:C:T	0.99
5:176551103:C:A	0.9
5:176629546:G:A	0.45
5:180308441:T:C	0.7
5:180349778:C:T	0.6
5:39451982:C:T	0.23
5:39549119:G:A	0.26
5:52088271:G:A	0.34
5:52095024:C:T	0.35
5:52697383:G:A	0.072
5:53276301:G:A	0.26
5:53298716:G:T	0.84
5:53303452:G:C	0.96
5:55808475:C:T	0.31
5:55861359:G:A	0.22
5:57578037:A:G	0.31
5:57607142:A:T	0.41
5:665148:A:G	0.92
5:67714246:A:G	0.73
5:72013573:T:G	0.91
5:72159179:C:T	0.41
5:72919127:G:C	0.93
5:74656539:T:C	0.72
5:75003678:T:C	0.82
5:75700310:C:T	0.44
5:78472599:G:T	0.83
5:78543716:T:G	1
5:82815158:A:G	0.28
5:90255685:A:G	0.29
5:96105926:G:A	0.38
6:100600097:T:C	0.26
6:100602753:G:A	0.26
6:100613551:T:C	0.34
6:101431977:C:T	0.97
6:101432314:A:G	0.97
6:106378009:G:T	0.2
6:107432157:C:A	0.38
6:107444903:G:C	0.87
6:109064220:C:T	0.84
6:109189021:C:G	0.076
6:109300661:C:T	0.73
6:109323519:G:T	0.64
6:109639710:C:G	0.11
6:116316882:G:T	0.38
6:116327493:A:G	0.37
6:116349041:C:T	0.44
6:116394819:T:A	0.47
6:11842824:G:A	0.58
6:11865597:T:C	0.85
6:11868682:T:C	0.98
6:126873423:G:T	0.047
6:127437617:C:T	0.97
6:127439897:G:C	0.96
6:127440047:T:C	0.48
6:130354855:T:C	0.82
6:130364482:C:T	0.38
6:130367863:T:TA	0.54
6:130371055:C:T	0.36
6:131931092:T:C	0.38
6:135418916:A:G	0.12
6:135428537:A:C	0.094
6:137082948:A:G	0.75
6:139261477:G:A	0.023
6:139331253:A:G	0.38
6:139831981:T:C	0.27
6:139835329:A:T	0.31
6:139835498:T:C	0.81
6:140360260:T:A	0.43
6:143268110:G:C	0.17
6:151015562:A:G	0.0022
6:151898506:C:T	0.99
6:153043035:G:A	0.99
6:153462557:A:G	0.68
6:153463135:C:A	0.68
6:160492613:T:C	0.42
6:160501825:G:A	0.052
6:161005610:C:T	0.65
6:161008646:G:A	0.32
6:161010118:A:G	0.61
6:16126934:G:A	0.49
6:16131156:T:C	0.47
6:161520837:G:A	0.72
6:161588372:C:T	0.79
6:161659369:C:G	0.59
6:163033350:A:G	0.14
6:163745049:A:G	0.56
6:164113762:A:G	0.68
6:16810627:G:T	0.56
6:18747705:G:T	0.036
6:18757805:T:C	0.1
6:20413721:A:G	0.6
6:20665549:G:A	0.16
6:21384613:A:G	0.32
6:21385702:T:C	0.41
6:21391282:T:C	0.44
6:22343592:G:A	0.81
6:25314597:A:G	0.11
6:25918225:T:C	0.82
6:26167951:C:G	0.58
6:26200677:A:G	0.32
6:27067657:A:T	0.86
6:28052823:A:C	0.62
6:28394680:C:T	0.82
6:28785085:C:T	0.39
6:29549653:C:G	0.37
6:29850784:A:G	0.53
6:29915061:T:C	0.68
6:29935250:G:A	0.76
6:30073847:C:T	0.42
6:30074072:G:C	0.33
6:30597083:C:T	0.089
6:30764907:G:A	0.062
6:30798697:C:T	0.037
6:31106459:C:A	0.59
6:31263510:T:C	0.55
6:31302029:A:G	0.32
6:31326289:G:A	0.69
6:31878495:A:G	0.42
6:31885930:C:T	0.19
6:32441696:C:T	0.95
6:32590735:C:T	0.4
6:32596370:C:T	0.98
6:32627700:A:G	0.34
6:32657201:T:A	0.11
6:34141700:C:A	0.45
6:34247047:C:T	0.3
6:34616322:G:C	0.28
6:34658080:A:C	0.053
6:35237153:C:T	0.16
6:35476562:T:A	0.53
6:35508531:G:A	0.93
6:36477260:G:A	0.58
6:36645968:G:C	0.29
6:37029684:A:C	0.98
6:37037818:T:TA	0.71
6:37038432:A:G	0.76
6:39238772:C:T	0.83
6:40962537:T:A	0.54
6:40998167:T:C	0.28
6:41986427:C:T	0.49
6:42839062:A:G	0.31
6:42934620:C:T	0.97
6:42940673:A:G	0.97
6:42940810:T:C	0.98
6:43756169:C:T	0.47
6:43757896:C:A	0.21
6:43760327:C:G	0.22
6:52458678:C:G	0.89
6:52627165:A:G	0.61
6:52630269:C:A	0.66
6:52643065:G:A	0.76
6:53508265:G:T	0.12
6:53509035:G:C	0.12
6:7247344:C:A	0.66
6:86296925:CA:C	0.14
6:86302034:A:G	0.19
6:88166740:T:C	0.68
6:98566506:CT:C	0.52
7:100280896:A:C	0.39
7:100873835:A:G	0.69
7:101886704:A:G	0.72
7:101928279:G:A	0.95
7:104638501:A:C	0.81
7:1051664:T:C	0.28
7:1067906:T:C	0.13
7:106801395:C:G	0.43
7:106835410:C:T	0.14
7:106946195:C:G	0.85
7:107056795:A:G	0.69
7:107624109:C:T	0.63
7:116305314:C:CA	0.3
7:116399131:G:A	0.66
7:116982907:G:A	0.26
7:12267552:G:A	0.043
7:12268082:CTTAA:C	0.048
7:127015083:G:A	0.084
7:130275219:G:A	0.097
7:130429186:T:A	0.022
7:130432538:A:T	0.023
7:130442141:C:G	0.045
7:137561861:A:G	0.28
7:139036598:G:T	0.62
7:149180625:C:G	0.69
7:150214465:T:G	0.58
7:150537635:G:A	0.81
7:155024830:G:A	0.004
7:155026807:T:C	0.0056
7:158511941:T:C	0.23
7:158583806:C:T	0.12
7:15903403:A:T	0.52
7:15913588:A:C	0.65
7:17284577:T:C	0.11
7:17287106:A:G	0.1
7:17287998:A:G	0.11
7:17817037:G:A	0.29
7:17920613:C:T	0.31
7:21605973:A:G	0.031
7:2296552:A:G	0.4
7:25991826:T:C	0.19
7:26397239:C:A	0.29
7:28180556:T:C	0.32
7:28215361:G:C	0.64
7:35671204:CATATATAAATATATATAA:C	0.6
7:36170409:T:C	0.95
7:36171953:C:T	0.74
7:36190426:C:T	0.81
7:36192606:T:G	0.34
7:38265179:CTTGAAAAGACAACCTTTCCCCATTGTACTGAT:C	0.45
7:41746922:C:G	0.77
7:41764992:C:T	0.71
7:44197583:G:T	0.094
7:44581986:T:C	0.75
7:50308527:C:T	0.94
7:50308811:G:C	0.94
7:5567596:C:T	0.51
7:6461310:C:T	0.36
7:72330303:C:T	0.81
7:73020301:T:C	0.3
7:73020337:C:G	0.62
7:73037366:G:A	0.76
7:74361240:C:T	0.33
7:75612803:C:T	0.85
7:75614777:G:A	0.96
7:75615006:C:T	0.76
7:77340821:T:A	0.35
7:80300449:T:G	0.84
7:80851648:G:C	0.095
7:81568750:T:G	0.088
7:81573045:T:A	0.21
7:8471545:C:T	NA
7:87074964:T:C	0.65
7:87076587:C:A	0.62
7:94953895:G:A	0.81
7:97915637:A:G	0.25
7:97977268:G:A	0.27
8:103876183:G:A	0.11
8:106385695:C:A	0.043
8:10643164:C:T	0.51
8:10643233:G:T	0.014
8:106433378:T:C	0.28
8:11528339:G:C	0.038
8:116597635:T:C	0.013
8:116638975:T:C	0.94
8:116657911:T:G	0.91
8:116658583:G:T	0.84
8:116659578:G:C	0.99
8:11702594:G:C	0.054
8:11854888:T:G	0.025
8:121872464:A:C	0.061
8:125756010:C:A	0.24
8:12617942:T:A	0.13
8:126500031:C:G	0.014
8:126507308:T:C	0.14
8:129567373:C:T	0.067
8:13506575:A:G	0.34
8:144296480:G:C	0.018
8:144306970:G:A	0.062
8:145040856:G:T	0.021
8:145051484:C:T	0.056
8:17616562:C:T	0.42
8:17800472:C:T	0.67
8:18272535:C:T	0.56
8:18272635:T:C	0.55
8:18272881:G:A	0.54
8:18273300:G:C	0.55
8:19251679:T:C	0.22
8:19820916:C:T	0.61
8:19823648:A:T	0.87
8:19830921:C:T	0.88
8:20485546:NA:NA	NA
8:20610866:T:C	0.96
8:21918089:A:C	0.47
8:23358480:T:TG	0.29
8:23525075:T:A	0.16
8:25464670:G:T	0.92
8:25464690:G:T	0.93
8:26203081:G:A	0.72
8:29024943:G:A	0.16
8:34519519:G:A	0.53
8:36848357:T:C	0.87
8:36853213:C:T	0.86
8:37385495:A:C	0.14
8:38328302:A:G	0.16
8:38328902:G:A	0.16
8:41542093:G:A	0.86
8:4780903:G:A	0.5
8:55422440:C:T	0.81
8:55437524:A:G	0.85
8:55441799:A:G	0.82
8:59388565:T:C	0.0071
8:59392324:G:A	0.01
8:60654261:G:A	0.16
8:61409871:G:T	0.5
8:61531713:A:T	0.68
8:61539278:A:T	0.63
8:64622944:A:AT	0.62
8:64799004:T:G	0.51
8:6600349:T:C	0.6
8:6620392:A:G	0.95
8:71196058:C:A	0.28
8:72459582:A:G	0.9
8:72466324:G:A	0.46
8:74888494:C:T	0.035
8:74899700:G:T	0.03
8:81357702:C:T	0.7
8:82404216:T:C	0.31
8:8316637:C:T	0.035
8:8569030:C:T	0.36
8:9183596:A:G	0.37
8:9183664:A:G	0.33
8:9195638:C:T	0.041
8:9723964:T:A	0.91
8:9788582:A:G	0.87
9:100640410:G:A	0.43
9:100784050:A:C	0.53
9:102119689:T:TA	0.93
9:102247368:A:G	0.42
9:1033773:C:G	0.4
9:1038666:C:T	0.6
9:105805994:T:G	NA
9:106526397:C:A	0.011
9:106532723:TA:T	0.21
9:107093784:G:T	0.46
9:107661742:A:C	0.2
9:107664301:C:T	0.23
9:107665978:C:G	0.45
9:108179115:T:G	0.2
9:109062494:C:A	0.76
9:110112471:G:C	0.19
9:110488875:C:A	0.18
9:110530324:A:G	0.44
9:112223059:A:G	0.11
9:112245773:G:C	0.63
9:112247790:G:GA	0.74
9:112556911:T:C	0.29
9:113830547:C:T	0.86
9:117083803:C:A	0.69
9:117133524:G:A	0.12
9:117148430:G:T	0.81
9:123480600:C:A	0.43
9:123481206:T:A	0.49
9:126539944:A:G	0.1
9:130758224:G:A	0.32
9:130770031:G:A	0.47
9:131466489:G:T	0.12
9:131468740:G:A	0.11
9:131561110:G:A	0.22
9:132214501:G:C	0.0016
9:13452771:A:G	0.68
9:136141870:C:T	0.9
9:136149399:G:A	0.84
9:13697152:A:C	0.18
9:137175998:G:A	0.72
9:137268682:C:T	0.67
9:139108324:A:G	0.98
9:139371405:G:C	0.58
9:139973820:C:T	0.027
9:14068327:A:C	0.57
9:15304782:C:A	0.15
9:16884586:T:A	0.39
9:16900695:A:G	0.58
9:16901067:C:A	0.41
9:19254604:G:A	0.78
9:19313913:A:G	0.71
9:19323815:G:A	0.73
9:19352260:A:T	0.87
9:22090301:C:A	0.65
9:22103341:T:G	0.26
9:22124504:A:T	0.6
9:2622278:G:A	0.39
9:2640759:A:G	0.93
9:28410683:T:C	0.0086
9:28414625:C:T	0.024
9:32450187:T:C	0.18
9:32523737:T:C	0.52
9:33128429:A:G	0.54
9:34151463:C:T	0.77
9:34175780:C:T	0.5
9:5073770:G:T	NA
9:6666512:A:T	0.18
9:6667928:C:A	0.18
9:78212428:A:G	0.054
9:78214833:G:A	0.053
9:78729213:T:C	0.43
9:86626769:T:A	0.47
9:88940359:C:T	0.75
9:91434086:G:A	0.44
9:91454519:C:T	0.43
9:92215734:T:C	0.004
9:93944244:C:T	0.23
9:95445032:G:C	0.63
9:96970677:A:G	0.68
