# Supplementary material for: Implicating genes, pleiotropy, and sexual dimorphism at blood lipid loci through multi-ancestry meta-analysis
Source: Genome Biol. 2022 Dec 27;23:268. doi: 10.1186/s13059-022-02837-1 (PMC9793579; doi:10.1186/s13059-022-02837-1)
Supplement: Supplementary file 29 — Additional file 29: Table S19. Comparison of sex-stratified effect sizes in the UK Biobank for BMI, waist hip ratio adjusted for BMI, alcohol use, and smoking status. [file 13059_2022_2837_MOESM29_ESM.xlsx]

## Sheet: Sheet1
Table S19: Comparison of sex-stratified effect sizes in the UK Biobank for BMI, waist hip ratio adjusted for BMI, alcohol use, and smoking status
Alcohol and smoking status (20116-0.0 and 20117-0.0) results were obtained from: https://datashare.ed.ac.uk/handle/10283/3917
BMI and WHRadjBMI results were obtained from the GIANT consortium
Significance was based on Bonferroni correction for the number of tested variants in each trait
Chr	pos (build 37)	Ref	Alt	trait	men_Effect	men_StdErr	men_P-value	women_Effect	women_StdErr	women_P-value	within_cohort_sex_diff_pvalue	sig_diff_within_cohort	BMI_men_BETA	BMI_men_SE	BMI_women_BETA	BMI_women_SE	BMI_p_diff	sig_diff_by_sex_BMI	WHRadjBMI_men_BETA	WHRadjBMI_men_SE	WHRadjBMI_women_BETA	WHRadjBMI_women_SE	WHRadjBMI_p_diff	sig_diff_by_sex_WHRadjBMI	Drinking_men_BETA	Drinking_men_SE	Drinking_women_BETA	Drinking_women_SE	Drinking_p_sex_comparison	sig_diff_by_sex_drinking	Smoking_men_BETA	Smoking_men_SE	Smoking_women_BETA	Smoking_women_SE	Smoking_p_sex_comparison	sig_diff_by_sex_smoking
1	914852	C	G	HDL	0.0102	0.0018	7.1e-09	0.0102	0.0021	6.289e-07	0.9928	not_sig	-0.0034118	0.00298009	-0.00194762	0.00273617	0.714701	not_sig	-0.00619751	0.00309748	-0.0110978	0.00274664	0.234476	not_sig	3.1939e-05	0.00097075	0.0014712	0.0012506	0.436673	not_sig	0.0023349	0.0019661	0.0015192	0.0017139	0.768602	not_sig
1	1831012	T	C	HDL	0.0068	0.0017	3.862e-05	0.0095	0.0019	3.908e-07	0.8104	not_sig	-0.0124669	0.00292664	-0.0147354	0.00268832	0.564222	not_sig	8.51421e-05	0.00304201	-0.00192294	0.00269852	0.619895	not_sig	-0.00152	0.00095225	0.00099462	0.0012273	0.0788696	not_sig	-0.00052843	0.0019286	-0.0020476	0.0016819	0.506932	not_sig
1	2975119	C	G	HDL	-0.0119	0.0024	7.046e-07	-0.0146	0.0026	3.414e-08	0.6176	not_sig	-0.00705534	0.00383145	-0.00233156	0.00352048	0.359153	not_sig	0.020665	0.00398204	0.0231155	0.00353394	0.643865	not_sig	-0.0016193	0.0012467	-0.0014467	0.0016074	0.714841	not_sig	0.0019583	0.002525	0.00026789	0.0022028	0.601672	not_sig
1	12518739	A	G	HDL	0.0376	0.0125	0.002581	0.0647	0.0132	8.937e-07	0.1834	not_sig	-0.0163533	0.0158504	0.00409737	0.0144575	0.335632	not_sig	-0.00555088	0.0164816	-0.0101395	0.0145214	0.833812	not_sig	0.0018306	0.0051475	0.0061988	0.0065906	0.71104	not_sig	-0.0053223	0.010425	0.0072522	0.0090321	0.326892	not_sig
1	20916080	C	G	HDL	-0.011	0.0018	3.836e-10	-0.0125	0.002	3.183e-10	0.9223	not_sig	-0.00319535	0.0030812	-0.00259608	0.00283168	0.884993	not_sig	-0.00555562	0.00320267	-0.00101869	0.0028422	0.287229	not_sig	7.6355e-05	0.0010032	-0.0011404	0.001294	0.509822	not_sig	-0.0015923	0.0020317	0.0011911	0.0017734	0.270752	not_sig
1	23734350	A	C	HDL	0.0222	0.0028	2.375e-15	0.0217	0.0031	4.048e-12	0.9786	not_sig	-0.00624661	0.00511894	0.000368046	0.00466871	0.33488	not_sig	-0.00243897	0.00532027	-0.00880737	0.00468685	0.366977	not_sig	0.00013076	0.0016592	0.0017782	0.0021235	0.61031	not_sig	-0.0030929	0.0033604	0.0011203	0.0029102	0.315855	not_sig
1	25049949	A	G	HDL	-0.0098	0.0018	2.909e-08	-0.0078	0.002	0.0001058	0.2362	not_sig	-0.00197573	0.00336525	0.000108211	0.00307734	0.644381	not_sig	0.00293911	0.00349781	0.000493476	0.00308891	0.598613	not_sig	-0.002038	0.0010975	-0.0022011	0.0014081	0.734141	not_sig	-0.0015064	0.0022228	-0.0019274	0.0019298	0.852933	not_sig
1	27180088	A	C	HDL	-0.0763	0.0058	1.006e-39	-0.0976	0.0065	1.23e-50	0.2209	not_sig	-0.00672972	0.00983974	-0.0123018	0.00889997	0.671426	not_sig	0.00823618	0.0102306	0.0183997	0.00893459	0.452316	not_sig	0.0033094	0.0032037	-0.0011459	0.0040761	0.329917	not_sig	0.0035752	0.0064885	-0.0026591	0.0055862	0.437085	not_sig
1	28319484	A	G	HDL	-0.0104	0.0017	9.715e-10	-0.0186	0.0019	4.843e-22	0.004164	not_sig	0.00177849	0.00318039	-2.47441e-05	0.002915	0.672893	not_sig	0.000318848	0.00330592	-0.00620642	0.00292594	0.137657	not_sig	0.0019709	0.0010337	-0.0010632	0.0013286	0.0470914	not_sig	-0.0010413	0.0020936	0.00020272	0.0018207	0.636984	not_sig
1	39438889	T	C	HDL	-0.0086	0.0018	1.822e-06	-0.0154	0.0021	9.167e-14	0.02076	not_sig	0.00782263	0.00309222	0.00638447	0.00282762	0.728836	not_sig	-0.00196477	0.00321419	0.00366985	0.00283835	0.186892	not_sig	0.0010511	0.0010075	-0.0012346	0.0012927	0.150203	not_sig	-0.0037596	0.0020405	0.00032851	0.0017716	0.11286	not_sig
1	40035928	T	G	HDL	0.0431	0.0022	3.766e-87	0.0475	0.0024	6.909e-88	0.2946	not_sig	-0.0190739	0.00367544	-0.0155882	0.00336325	0.479759	not_sig	-0.002176	0.00382083	-0.0132634	0.00337609	0.0289515	not_sig	-0.0020527	0.0011969	0.0014037	0.0015371	0.0551234	not_sig	0.00010356	0.0024241	-0.0043353	0.0021066	0.129311	not_sig
1	56983585	A	G	HDL	0.0181	0.0026	5.67e-12	0.012	0.0029	4.497e-05	0.03651	not_sig	-0.00453851	0.00446086	0.00281954	0.00408855	0.219367	not_sig	-0.00737186	0.00463782	-0.0125938	0.00410439	0.397053	not_sig	-0.0008914	0.001449	0.0015538	0.0018632	0.30161	not_sig	0.0021398	0.0029346	-0.003922	0.0025534	0.092613	not_sig
1	63050598	T	G	HDL	-0.0098	0.0017	7.886e-09	-0.0173	0.0019	4.339e-19	8.569e-05	sig	-0.00492659	0.00304718	-0.00826189	0.00280051	0.415645	not_sig	0.00587329	0.00316757	-0.00712867	0.00281126	0.00204551	not_sig	0.00019034	0.00099312	-0.0019206	0.0012811	0.242743	not_sig	0.00051206	0.0020114	0.00044339	0.0017556	0.985897	not_sig
1	66098653	T	C	HDL	0.007	0.0016	2.171e-05	0.0152	0.0019	8.333e-16	0.01299	not_sig	0.00145141	0.00301707	-0.00117149	0.00276679	0.517524	not_sig	0.001847	0.00313621	-0.0104336	0.00277704	0.00323414	not_sig	0.002975	0.00098344	-0.00064733	0.0012656	0.0084764	not_sig	0.0047924	0.0019918	0.0039384	0.0017345	0.798612	not_sig
1	71428732	A	C	HDL	0.0091	0.0016	2.79e-08	0.0131	0.0019	2.353e-12	0.1579	not_sig	-0.00323	0.00299894	-0.00637941	0.00275202	0.434488	not_sig	-0.000557236	0.00311734	-0.00683604	0.00276256	0.130009	not_sig	0.00072147	0.00097767	-0.0001161	0.0012589	0.535354	not_sig	-0.0027682	0.0019801	-0.0020303	0.0017252	0.802167	not_sig
1	72754788	T	C	HDL	-0.0135	0.0021	2.912e-10	-0.0135	0.0024	3.613e-08	0.3807	not_sig	0.0390181	0.00369368	0.0261749	0.0033868	0.00963724	not_sig	-0.00505748	0.00383961	0.00247486	0.00339923	0.140127	not_sig	5.5087e-05	0.0012039	-0.0015434	0.0015482	0.475187	not_sig	0.0030936	0.0024383	0.005892	0.0021217	0.315355	not_sig
1	85721911	T	C	HDL	-0.0077	0.0016	1.967e-06	-0.0074	0.0018	5.387e-05	0.7728	not_sig	0.00442137	0.00291138	0.00928495	0.00267294	0.213891	not_sig	0.00172449	0.00302625	-0.00176941	0.00268314	0.385564	not_sig	-0.00025768	0.00094936	-0.00093002	0.0012229	0.753492	not_sig	3.2883e-05	0.0019227	0.00054282	0.0016759	0.825586	not_sig
1	93860625	A	G	HDL	0.0245	0.0017	1.246e-48	0.0283	0.0019	2.217e-50	0.3847	not_sig	0.00045312	0.00301787	-0.00260412	0.0027655	0.450617	not_sig	0.001435	0.00313702	0.000607739	0.00277584	0.84276	not_sig	0.00026786	0.00098338	0.001549	0.0012649	0.529252	not_sig	0.00077999	0.0019916	-0.0031184	0.0017334	0.108293	not_sig
1	109817590	T	G	HDL	-0.036	0.002	2.842e-75	-0.0327	0.0023	3.232e-47	0.3729	not_sig	-0.00193183	0.00350018	-0.00235129	0.00321685	0.928985	not_sig	-0.000629209	0.00363853	-0.00859229	0.00322925	0.10016	not_sig	-0.0013215	0.0011424	-0.0010995	0.0014727	0.71659	not_sig	-0.0054728	0.0023136	-0.0044253	0.0020183	0.782168	not_sig
1	110470764	A	G	HDL	0.0256	0.0023	2.268e-28	0.0317	0.0025	9.166e-36	0.6306	not_sig	-0.00298421	0.00408517	-0.00194129	0.00373453	0.849059	not_sig	-0.0169643	0.00424658	-0.00190619	0.00374814	0.00757963	not_sig	0.0012066	0.0013345	0.00020721	0.0017125	0.547802	not_sig	-0.004755	0.0027028	0.0011239	0.0023469	0.0834094	not_sig
1	120484718	T	C	HDL	0.1006	0.0174	7.323e-09	0.0735	0.018	4.495e-05	0.7118	not_sig	0.00116653	0.0282062	0.0404743	0.0250246	0.292389	not_sig	0.0280489	0.0293517	-0.0104723	0.0250943	0.316388	not_sig	NA	NA	NA	NA	NA	NA	NA	NA	NA	NA	NA	NA
1	145472741	A	C	HDL	-0.1345	0.0165	3.071e-16	-0.1488	0.0191	6.652e-15	0.6553	not_sig	-0.029961	0.0346465	0.0462515	0.0320251	0.102766	not_sig	0.0184787	0.0360213	0.00211481	0.0320924	0.733337	not_sig	NA	NA	NA	NA	NA	NA	NA	NA	NA	NA	NA	NA
1	149992277	T	C	HDL	0.0283	0.0031	2.236e-19	0.0213	0.0036	2.238e-09	0.1838	not_sig	-0.0089324	0.00518889	-0.00372357	0.00476071	0.45499	not_sig	-0.0108791	0.00539215	0.00151274	0.00477796	0.0840576	not_sig	-0.0025384	0.0016784	0.00033016	0.0021554	0.212346	not_sig	-0.0066046	0.0033993	-0.0033784	0.0029539	0.480064	not_sig
1	150842696	T	C	HDL	-0.0246	0.0021	2.589e-32	-0.0197	0.0023	2.486e-17	0.1997	not_sig	-0.00343345	0.00360944	0.00283386	0.00329976	0.19552	not_sig	-0.00990195	0.00375207	-0.015218	0.00331178	0.286008	not_sig	-0.00015962	0.0011737	0.00073002	0.0015049	0.665053	not_sig	0.004492	0.0023771	0.0032795	0.0020624	0.730415	not_sig
1	154555733	A	T	HDL	0.0044	0.0019	0.01626	0.016	0.0021	7.496e-15	3.949e-05	sig	0.00569486	0.00319997	-0.00417738	0.00294362	0.0218263	not_sig	0.00324769	0.00332641	-0.000608244	0.00295474	0.384038	not_sig	0.0005459	0.0010415	0.00096053	0.0013437	0.925998	not_sig	-0.0026947	0.0021093	0.0007228	0.0018415	0.197818	not_sig
1	156705822	T	C	HDL	-0.0096	0.0018	4.204e-08	-0.0134	0.002	1.962e-11	0.2511	not_sig	0.00130732	0.00307823	-0.00299845	0.00282233	0.2977	not_sig	0.00571876	0.00319985	0.00241991	0.0028331	0.438174	not_sig	0.0019058	0.0010035	-0.000138	0.0012908	0.131837	not_sig	0.0024821	0.0020324	0.0012787	0.0017689	0.660018	not_sig
1	161078909	T	C	HDL	0.0117	0.0018	1.132e-10	0.0092	0.002	5.178e-06	0.824	not_sig	-0.00569184	0.00301131	-0.00862972	0.00276547	0.467964	not_sig	0.00107693	0.00313026	0.00764539	0.00277602	0.114825	not_sig	0.00071971	0.00097759	0.00072606	0.0012594	0.871176	not_sig	-0.00069112	0.0019799	0.00077395	0.0017259	0.549635	not_sig
1	161614490	T	G	HDL	0.01	0.0018	7.156e-08	0.0125	0.0023	9.272e-08	0.8989	not_sig	NA	NA	NA	NA	NA	NA	NA	NA	NA	NA	NA	NA	NA	NA	NA	NA	NA	NA	NA	NA	NA	NA	NA	NA
1	172361977	T	G	HDL	0.0099	0.0017	3.692e-09	0.0139	0.0019	2.502e-13	0.2863	not_sig	0.00254976	0.00294449	0.000643813	0.00269915	0.629843	not_sig	-0.0174351	0.0030607	-0.0372534	0.00270937	1.11728e-06	sig	-0.0014646	0.00095913	-0.0014339	0.0012336	0.718318	not_sig	-0.00054936	0.0019425	-0.0021299	0.0016906	0.492646	not_sig
1	174168805	T	G	HDL	0.0077	0.0017	6.4e-06	0.0113	0.0019	3.541e-09	0.456	not_sig	-0.0049236	0.00299773	-0.00952661	0.00274961	0.253057	not_sig	0.00356959	0.00311617	0.00145878	0.00276002	0.610534	not_sig	-0.00073827	0.00097625	0.00036979	0.0012561	0.440311	not_sig	0.005309	0.0019772	0.003282	0.0017214	0.460647	not_sig
1	177885762	A	G	HDL	0.0074	0.0019	0.0001184	0.0161	0.0022	1.306e-13	0.07014	not_sig	-0.0337548	0.00344369	-0.0474147	0.00316712	0.00318817	not_sig	0.00239244	0.00357981	0.00763275	0.00317896	0.271595	not_sig	0.0012476	0.0011221	-0.0017051	0.0014478	0.100464	not_sig	-0.0037726	0.0022725	-0.0037744	0.0019842	0.944478	not_sig
1	178533832	T	G	HDL	0.0178	0.0016	6.349e-29	0.0203	0.0018	1.181e-29	0.3522	not_sig	-0.00186701	0.00292426	0.00189977	0.00267976	0.33745	not_sig	0.00751265	0.0030399	-0.0024906	0.00268991	0.0133143	not_sig	0.0006841	0.00095318	-0.0021655	0.0012252	0.0807187	not_sig	0.00015646	0.0019305	0.00076274	0.0016791	0.791992	not_sig
1	182150978	A	C	HDL	0.0261	0.0017	1.984e-52	0.0239	0.0019	5.584e-35	0.2404	not_sig	-0.00246475	0.00309855	0.0028097	0.00283902	0.204909	not_sig	0.000896097	0.00322081	0.00469021	0.00284984	0.375553	not_sig	0.0013886	0.0010086	0.0012447	0.0012967	0.699787	not_sig	0.0032327	0.0020426	0.00034992	0.001777	0.269593	not_sig
1	184035116	A	G	HDL	-0.0085	0.0017	4.128e-07	-0.0074	0.0019	0.0001044	0.952	not_sig	-0.00567798	0.00307224	-0.00189981	0.00281652	0.359875	not_sig	0.00756862	0.00319365	0.00572049	0.002827	0.6634	not_sig	0.00018065	0.00099914	0.0012271	0.0012853	0.607001	not_sig	0.0023438	0.0020236	0.00023141	0.0017614	0.413995	not_sig
1	200049302	A	T	HDL	0.0096	0.0018	6.827e-08	0.0102	0.002	4.388e-07	0.5245	not_sig	0.00139742	0.0032158	-0.00188637	0.00294193	0.446658	not_sig	0.0137225	0.00334265	0.0149746	0.00295297	0.77797	not_sig	0.00098787	0.0010456	0.00036063	0.0013426	0.595409	not_sig	-0.0026867	0.0021177	-0.0002288	0.00184	0.362933	not_sig
1	202197659	T	C	HDL	-0.0105	0.0017	3.459e-10	-0.0074	0.0019	0.0001003	0.2372	not_sig	0.00208833	0.00300807	0.00463971	0.00275837	0.527765	not_sig	0.000192115	0.00312662	0.00555919	0.00276863	0.196769	not_sig	-0.001356	0.00097354	9.8321e-05	0.0012532	0.269215	not_sig	0.0020703	0.0019717	-0.00028828	0.0017174	0.343464	not_sig
1	203518873	A	C	HDL	0.0095	0.0018	8.86e-08	0.0135	0.002	3.326e-11	0.01732	not_sig	0.012625	0.00296675	0.00437616	0.00271925	0.0384242	not_sig	0.000899214	0.00308382	-0.0204813	0.00272953	1.84306e-07	sig	0.00038026	0.00095916	0.00026921	0.0012332	0.880266	not_sig	-0.0011553	0.0019426	0.0016444	0.0016901	0.242057	not_sig
1	205099959	A	C	HDL	0.0119	0.0019	2.206e-10	0.014	0.0021	5.186e-11	0.3274	not_sig	-0.00448185	0.00346257	-0.00472596	0.00317957	0.95817	not_sig	-0.00670371	0.00359936	-0.0156882	0.0031915	0.0606665	not_sig	0.00050601	0.0011282	-0.00052066	0.0014536	0.560017	not_sig	-0.0073275	0.0022849	-0.002115	0.0019921	0.0791231	not_sig
1	205677148	A	G	HDL	0.015	0.0016	3.934e-20	0.0153	0.0018	1.562e-16	0.8679	not_sig	-0.0114838	0.00297486	-0.00442234	0.00273345	0.0774861	not_sig	0.0043164	0.00309254	-0.00372885	0.00274353	0.0506233	not_sig	-0.0013031	0.00096671	-0.0010836	0.0012463	0.672052	not_sig	0.0019129	0.0019579	0.00547	0.0017079	0.122403	not_sig
1	212537553	A	G	HDL	-0.0099	0.0017	8.637e-09	-0.0116	0.0019	2.039e-09	0.368	not_sig	-0.000686419	0.00300036	0.00248723	0.00276288	0.431908	not_sig	0.00449416	0.0031188	0.0119519	0.00277329	0.0726828	not_sig	-0.0012037	0.00097653	-0.0012791	0.0012619	0.813391	not_sig	-0.0048738	0.0019777	-0.0034417	0.0017293	0.619526	not_sig
1	219664627	A	G	HDL	0.017	0.0016	5.503e-25	0.015	0.0019	5.902e-16	0.5389	not_sig	0.00828434	0.00296549	0.0095633	0.00272514	0.748398	not_sig	-0.00580989	0.00308265	-0.0535058	0.00273556	3.11996e-31	sig	0.0011613	0.00096177	0.0020181	0.0012403	0.841393	not_sig	0.0013119	0.0019479	0.0012042	0.0016998	0.98582	not_sig
1	220970028	A	G	HDL	0.0285	0.0018	2.354e-55	0.0291	0.0021	5.356e-45	0.6408	not_sig	-0.00421277	0.00318144	8.40832e-05	0.00292356	0.315152	not_sig	-0.00125332	0.00330724	0.00019818	0.00293456	0.741602	not_sig	-0.00068022	0.0010379	0.00063611	0.0013383	0.412906	not_sig	0.00064687	0.0021021	0.0028929	0.0018341	0.369558	not_sig
1	224544746	A	G	HDL	0.0323	0.005	1.132e-10	0.0292	0.0057	2.752e-07	0.6832	not_sig	-0.00120581	0.0106014	-0.00155989	0.00967718	0.980122	not_sig	-0.00250909	0.0110213	-0.010936	0.00971586	0.564558	not_sig	NA	NA	NA	NA	NA	NA	NA	NA	NA	NA	NA	NA
1	230294715	A	C	HDL	-0.0482	0.0017	5.86e-185	-0.0489	0.0019	2.72e-146	0.0978	not_sig	0.00502906	0.00298133	0.00969032	0.00273888	0.24485	not_sig	0.000515992	0.00309879	-0.00245516	0.00274925	0.471285	not_sig	0.00050755	0.00097224	0.0032415	0.0012533	0.170226	not_sig	-0.00033533	0.0019691	0.00040432	0.0017176	0.761194	not_sig
1	234852760	T	C	HDL	-0.0197	0.0017	2.925e-32	-0.011	0.0019	2.761e-09	1.943e-05	sig	0.00379379	0.00291747	-0.00174952	0.00267735	0.157369	not_sig	0.00109641	0.00303262	-0.00463905	0.00268736	0.15511	not_sig	-0.00016882	0.00095118	0.00091257	0.0012245	0.520711	not_sig	-0.0012893	0.0019264	-0.00032114	0.0016781	0.697641	not_sig
10	5257647	A	G	HDL	0.0117	0.0023	2.072e-07	0.0155	0.0026	1.339e-09	0.6869	not_sig	-0.00919261	0.00404911	-0.0050461	0.00371318	0.445861	not_sig	4.8969e-05	0.0041987	0.0064047	0.00373089	0.255727	not_sig	-0.0020294	0.0013212	0.0006217	0.0016988	0.158701	not_sig	-0.0018759	0.0026626	0.0003236	0.002324	0.512822	not_sig
10	13574659	C	G	HDL	-0.005	0.0017	0.003275	-0.0088	0.0019	2.958e-06	0.7061	not_sig	0.00433336	0.00294527	0.00800726	0.00270377	0.353333	not_sig	-0.00362209	0.00305357	0.00450397	0.00271646	0.0458193	not_sig	-0.0004446	0.00095266	-0.00061717	0.0012259	0.992782	not_sig	0.0053095	0.0019198	0.0057605	0.0016771	0.757118	not_sig
10	17265447	T	C	HDL	0.0139	0.0016	6.154e-18	0.0116	0.0019	9.244e-10	0.1852	not_sig	-0.00151691	0.0029735	0.00888576	0.00272906	0.00923131	not_sig	0.00175321	0.00308297	-0.00377815	0.00274191	0.178118	not_sig	-0.0013486	0.00096222	-0.00071921	0.0012377	0.507876	not_sig	-0.0018536	0.0019392	-8.3269e-05	0.0016933	0.474145	not_sig
10	33630848	A	G	HDL	-0.0247	0.0027	2.138e-20	-0.0207	0.003	3.823e-12	0.1374	not_sig	-0.00129562	0.00505034	0.00816168	0.00465137	0.164143	not_sig	-0.0106421	0.00523584	0.00228705	0.00467314	0.0642529	not_sig	0.0019567	0.0016359	0.0013113	0.0021119	0.632968	not_sig	-0.0054231	0.0032969	-0.0027102	0.0028892	0.540803	not_sig
10	46026107	A	G	HDL	-0.024	0.0019	1.029e-35	-0.0305	0.0022	7.252e-44	0.1353	not_sig	0.0039038	0.00344431	0.00491619	0.00314804	0.826539	not_sig	0.00250563	0.00357106	-0.00999638	0.00316307	0.00848177	not_sig	-0.00011468	0.0011143	-0.00066824	0.001428	0.80993	not_sig	0.00034346	0.0022456	-0.001535	0.0019536	0.492064	not_sig
10	61409469	A	G	HDL	0.0103	0.0017	3.875e-10	0.0118	0.0019	3.95e-10	0.9204	not_sig	-0.00564254	0.0029822	-0.0011764	0.00273548	0.264969	not_sig	-0.00267853	0.00309176	0.0019502	0.00274843	0.261071	not_sig	0.0001675	0.00096733	-0.00092931	0.0012434	0.522107	not_sig	-0.00073883	0.0019495	0.0019988	0.001701	0.251493	not_sig
10	63837006	A	G	HDL	-0.008	0.0017	1.66e-06	-0.0146	0.0019	1.235e-14	0.005559	not_sig	-0.00212933	0.00297275	-0.000168477	0.00272762	0.623492	not_sig	0.000164226	0.00308193	0.0202772	0.00274047	9.66081e-07	sig	-0.00071862	0.00096317	-0.0029582	0.0012385	0.287083	not_sig	-0.0028693	0.001941	-0.004017	0.0016943	0.581752	not_sig
10	64988931	A	T	HDL	0.0025	0.0016	0.1238	0.0231	0.0019	1.41e-35	6.217e-11	sig	-0.0115043	0.00292815	-0.0145121	0.0026908	0.444896	not_sig	-0.00535648	0.00303604	-0.0130397	0.00270372	0.0576646	not_sig	0.00059587	0.00094898	0.00044424	0.0012223	0.821289	not_sig	-0.002619	0.0019125	-0.0040417	0.0016721	0.501508	not_sig
10	71941078	A	G	HDL	-0.0069	0.0017	4.407e-05	-0.0085	0.0019	9.952e-06	0.3334	not_sig	0.0043458	0.00305093	0.00187074	0.00279026	0.545406	not_sig	-6.02259e-05	0.00316335	-0.00169768	0.00280356	0.697204	not_sig	-0.00075683	0.00098406	0.0016786	0.0012611	0.136955	not_sig	0.0025102	0.0019832	-0.00071145	0.0017253	0.195708	not_sig
10	74666065	A	G	HDL	0.0138	0.003	3.587e-06	0.0177	0.0035	5.182e-07	0.6351	not_sig	-0.0138941	0.00678945	0.00478651	0.00624691	0.040843	not_sig	0.00104547	0.00704073	0.0136347	0.00627641	0.180047	not_sig	0.0010347	0.0021997	-0.0020613	0.0028346	0.394701	not_sig	0.012849	0.004433	0.0089267	0.0038778	0.541028	not_sig
10	76861680	T	C	HDL	-0.0068	0.0017	5.186e-05	-0.0103	0.0019	1.175e-07	0.04933	not_sig	0.0113808	0.0029714	0.0079906	0.00272719	0.39587	not_sig	0.0037627	0.00308076	0.00111574	0.0027402	0.519044	not_sig	-0.00052314	0.00096695	-0.0022878	0.0012441	0.397928	not_sig	0.005446	0.0019486	0.0008146	0.001702	0.0642427	not_sig
10	80954251	A	G	HDL	-0.0083	0.0017	5.826e-07	-0.0118	0.0019	3.186e-10	0.8568	not_sig	0.00588681	0.0029759	0.00710333	0.00272453	0.760715	not_sig	0.0148997	0.00308524	0.0153401	0.00273757	0.914596	not_sig	-0.00015613	0.00096384	-0.00045711	0.0012367	0.897216	not_sig	-0.0041952	0.0019424	6.0538e-05	0.0016918	0.0844685	not_sig
10	93575831	A	G	HDL	0.0168	0.0035	1.72e-06	0.0166	0.004	3.132e-05	0.1917	not_sig	0.00143964	0.00607664	0.0011191	0.00557874	0.968693	not_sig	-0.00298826	0.00629967	-0.00325706	0.00560613	0.97446	not_sig	0.0017527	0.0019643	0.00064301	0.0025289	0.617036	not_sig	0.00024397	0.0039587	0.0025429	0.0034596	0.62913	not_sig
10	94274809	A	G	HDL	-0.0176	0.0029	1.24e-09	-0.0164	0.0032	3.012e-07	0.3916	not_sig	-0.00756619	0.00474803	-0.00557057	0.00436596	0.754662	not_sig	0.00418958	0.0049216	0.0115176	0.00438807	0.264307	not_sig	-0.00082512	0.0015488	-0.00349	0.0019952	0.428686	not_sig	0.0023632	0.0031213	0.00029742	0.0027296	0.60594	not_sig
10	94839724	T	G	HDL	-0.0191	0.0016	1.934e-32	-0.0214	0.0019	5.184e-31	0.2866	not_sig	-0.00737678	0.00294118	-0.00852941	0.00269723	0.770491	not_sig	-0.00635704	0.0030493	0.00310572	0.00271019	0.0198192	not_sig	0.0008517	0.00095382	0.002543	0.0012258	0.459874	not_sig	0.0015152	0.0019222	-0.0026223	0.001677	0.0802593	not_sig
10	95340811	T	G	HDL	-0.0157	0.0022	2.285e-12	-0.0206	0.0026	8.048e-16	0.2442	not_sig	-0.00109112	0.00409158	-0.00281893	0.00375534	0.753341	not_sig	-0.000757556	0.00424211	0.0241832	0.0037734	1.02278e-05	sig	0.00051374	0.0013126	0.0017673	0.0016877	0.675859	not_sig	0.0009573	0.0026453	0.0016161	0.0023088	0.824954	not_sig
10	101912194	T	C	HDL	-0.0153	0.0017	1.983e-19	-0.0133	0.0019	7.553e-12	0.5271	not_sig	0.00479373	0.00291833	-9.12513e-05	0.00268616	0.213506	not_sig	0.00860483	0.00302561	0.000649659	0.00269886	0.04875	not_sig	-0.00054694	0.00094648	0.0013022	0.0012208	0.244394	not_sig	0.0013655	0.0019074	0.0035269	0.0016701	0.333903	not_sig
10	113934384	C	G	HDL	0.0283	0.0018	1.067e-55	0.0371	0.002	4.407e-74	0.04331	not_sig	-0.00564455	0.00327823	-0.00905607	0.00300258	0.438265	not_sig	0.00185947	0.00339912	0.00977836	0.00301707	0.0801129	not_sig	2.624e-05	0.0010636	0.0015469	0.0013647	0.45144	not_sig	-3.468e-05	0.0021434	-0.00036575	0.001867	0.897645	not_sig
10	115786233	A	G	HDL	-0.0303	0.0027	1.583e-29	-0.0322	0.003	3.206e-26	0.8775	not_sig	-0.00890897	0.00442295	-0.000811082	0.0040535	0.172775	not_sig	-0.00709112	0.00458602	-0.0129426	0.00407275	0.337941	not_sig	-0.00017832	0.0014296	0.0023741	0.001836	0.329561	not_sig	-0.0018956	0.002881	-0.0020857	0.0025118	0.934645	not_sig
10	118407116	A	T	HDL	0.0097	0.0016	1.926e-09	0.0126	0.0018	6.811e-12	0.951	not_sig	0.000283674	0.00297177	0.00343769	0.00272529	0.429487	not_sig	-0.00358504	0.00308114	-0.00305201	0.00273841	0.896662	not_sig	-0.00021125	0.00096137	-0.00075509	0.0012358	0.802264	not_sig	-0.0012564	0.0019374	0.00044156	0.0016906	0.48485	not_sig
10	121641900	A	G	HDL	-0.0114	0.0017	4.884e-12	-0.0063	0.0019	0.0006886	0.05074	not_sig	-0.0064336	0.00298898	-0.00569372	0.00273808	0.853729	not_sig	0.00375946	0.003099	0.00164596	0.00275097	0.608454	not_sig	0.00079037	0.00096864	0.00040602	0.0012435	0.693351	not_sig	-0.00052611	0.0019521	0.0016516	0.0017011	0.36134	not_sig
10	122929493	T	C	HDL	-0.0304	0.0032	8.751e-22	-0.0273	0.0037	1.144e-13	0.2051	not_sig	-0.0039768	0.0100168	-0.00707747	0.00916834	0.817599	not_sig	0.00472126	0.0103883	0.0307982	0.00921098	0.0592249	not_sig	0.0018099	0.0032436	0.0045394	0.0041639	0.748464	not_sig	0.0027908	0.0065369	-0.0026607	0.0056963	0.50094	not_sig
10	126733319	A	G	HDL	-0.0068	0.0018	0.0001895	-0.0132	0.002	7.138e-11	0.007756	not_sig	0.0114544	0.00325681	0.0157436	0.00299208	0.32729	not_sig	-0.00587992	0.00337655	-0.0115058	0.003006	0.211317	not_sig	0.00084165	0.0010543	0.0022663	0.0013578	0.591846	not_sig	0.00035798	0.0021248	0.0022869	0.0018576	0.44855	not_sig
11	823586	C	G	HDL	-0.0429	0.0078	4.189e-08	-0.0745	0.0089	5.085e-17	0.09698	not_sig	-0.0255154	0.0125619	-0.0391677	0.0114478	0.417165	not_sig	0.0684724	0.0130251	0.097559	0.0115012	0.0927008	not_sig	-0.0030862	0.0040717	0.0003775	0.0052035	0.533112	not_sig	0.0078835	0.0082236	0.0022951	0.0071212	0.599942	not_sig
11	2936657	A	G	HDL	-0.0238	0.0028	1.674e-17	-0.0228	0.0031	2.758e-13	0.4358	not_sig	0.0120514	0.00510109	0.00466733	0.00467251	0.280963	not_sig	0.00124155	0.00528929	-0.0113991	0.00469421	0.0726015	not_sig	0.002066	0.0016427	0.0016988	0.0021096	0.687786	not_sig	0.0014444	0.0033178	-0.003325	0.002887	0.240655	not_sig
11	10381766	A	T	HDL	-0.0085	0.0017	1.045e-06	-0.0162	0.002	3.451e-16	0.4217	not_sig	0.0057788	0.00325239	-0.00232609	0.00297713	0.0633628	not_sig	-0.00877562	0.00337211	-0.00638502	0.00299134	0.594256	not_sig	0.00042131	0.0010545	-0.00093388	0.0013532	0.4402	not_sig	-3.6997e-05	0.0021298	0.0014598	0.001852	0.560599	not_sig
11	13355770	T	C	HDL	0.0087	0.0017	3.017e-07	0.0099	0.0019	3.188e-07	0.8139	not_sig	-0.0105953	0.00304461	-0.0115055	0.00279476	0.823963	not_sig	-0.00740275	0.0031568	-0.0107822	0.00280805	0.421742	not_sig	9.7361e-05	0.00098703	0.0014999	0.0012698	0.464879	not_sig	5.8319e-05	0.0019935	-0.0005464	0.0017378	0.802586	not_sig
11	14012524	T	C	HDL	0.0091	0.0016	2.037e-08	0.009	0.0018	9.451e-07	0.8591	not_sig	0.000635696	0.00294608	-0.00337254	0.00270058	0.311059	not_sig	0.00426219	0.00305489	-0.000438035	0.00271337	0.247917	not_sig	0.00019273	0.00095273	0.0017165	0.0012243	0.422291	not_sig	0.0017037	0.0019242	-0.0022903	0.0016755	0.0923707	not_sig
11	14865399	T	C	HDL	-0.2706	0.0324	7.102e-17	-0.4581	0.0385	1.403e-32	8.362e-05	sig	-0.101071	0.055921	-0.162522	0.0500411	0.408179	not_sig	0.0863191	0.0579928	0.352553	0.050356	0.000498336	not_sig	-0.020434	0.014935	-0.022648	0.018918	0.81733	not_sig	0.023932	0.030164	-0.053781	0.025891	0.034411	not_sig
11	27690399	T	C	HDL	-0.0147	0.0017	5.364e-18	-0.0152	0.0019	3.664e-15	0.8183	not_sig	0.0313324	0.00311621	0.0267946	0.00285491	0.27814	not_sig	-0.0029163	0.00323117	0.0011614	0.00286846	0.343169	not_sig	NA	NA	NA	NA	NA	NA	NA	NA	NA	NA	NA	NA
11	29200527	T	C	HDL	0.015	0.0021	1.47e-12	0.0113	0.0025	4.073e-06	0.3166	not_sig	-0.0186121	0.00413439	-0.00830173	0.00379621	0.063542	not_sig	0.00333381	0.00428599	0.00196231	0.00381423	0.810253	not_sig	-3.7743e-05	0.0013384	0.0032376	0.0017225	0.19257	not_sig	-0.0023296	0.0027031	0.0019721	0.0023574	0.199898	not_sig
11	32470828	T	C	HDL	0.0132	0.0016	7.529e-16	0.0089	0.0019	2.031e-06	0.6712	not_sig	-0.00349109	0.00297976	-0.00171333	0.00273282	0.65696	not_sig	0.0174505	0.00308966	0.00583238	0.00274588	0.0047558	not_sig	1.5892e-05	0.00096681	0.0020769	0.0012425	0.259935	not_sig	0.0012232	0.0019527	0.0013408	0.0017005	0.939451	not_sig
11	36328427	T	TA	HDL	0.0076	0.0018	3.133e-05	0.0146	0.0022	2.145e-11	0.018	not_sig	NA	NA	NA	NA	NA	NA	NA	NA	NA	NA	NA	NA	NA	NA	NA	NA	NA	NA	NA	NA	NA	NA	NA	NA
11	45913607	A	G	HDL	-0.037	0.0038	1.428e-22	-0.0363	0.0042	5.332e-18	0.9731	not_sig	0.0225977	0.00623855	0.00619738	0.00570726	0.0500964	not_sig	-0.00667581	0.0064694	-0.00388537	0.00573499	0.745795	not_sig	-0.00026248	0.0019873	0.0015184	0.002548	0.613282	not_sig	-0.0010045	0.0040139	0.0025796	0.0034871	0.465268	not_sig
11	47278917	T	C	HDL	-0.0415	0.0017	5.39e-132	-0.0366	0.0019	8.384e-79	0.03748	not_sig	0.00973434	0.00318193	0.0076322	0.00291725	0.622819	not_sig	-0.0106319	0.00329914	-0.00254141	0.00293155	0.0655855	not_sig	7.4414e-05	0.001032	-0.0012218	0.0013264	0.495148	not_sig	-0.0024233	0.0020843	-0.0028842	0.0018152	0.816863	not_sig
11	56652022	A	G	HDL	-0.0268	0.0035	3.313e-14	-0.0215	0.0039	3.705e-08	0.2219	not_sig	0.0152709	0.00596663	0.0111642	0.00545777	0.607976	not_sig	-0.00934973	0.00618604	-0.0053135	0.00548454	0.623869	not_sig	-0.0018036	0.0019318	-0.0012	0.002479	0.706803	not_sig	-0.011297	0.0039016	-0.0074167	0.0033926	0.481415	not_sig
11	58162382	A	G	HDL	-0.0215	0.0032	1.094e-11	-0.0148	0.0035	2.01e-05	0.07226	not_sig	0.00327045	0.00541872	0.00170907	0.00499678	0.830578	not_sig	0.0018566	0.00561852	-0.000963764	0.00502091	0.706953	not_sig	-0.00071023	0.0017514	-0.0026479	0.0022612	0.621134	not_sig	0.0038993	0.0035374	0.0011273	0.0030946	0.547065	not_sig
11	61588305	A	G	HDL	-0.0407	0.0017	5.48e-127	-0.0462	0.0019	3.53e-126	0.7005	not_sig	-0.00203168	0.00307048	0.00788664	0.00281719	0.0162125	not_sig	-0.00860246	0.00318362	-0.00438129	0.00283086	0.319632	not_sig	-8.4694e-05	0.00099536	-0.00023355	0.00128	0.952066	not_sig	0.00025924	0.0020103	0.00080198	0.0017518	0.818879	not_sig
11	64004723	C	G	HDL	0.0471	0.0041	4.966e-30	0.0556	0.0047	3.399e-32	0.5579	not_sig	0.0209292	0.0072765	-0.0011869	0.00660761	0.0230443	not_sig	-0.0201251	0.00754828	-0.0896717	0.00663955	3.68979e-12	sig	0.00089858	0.0023133	-0.0030375	0.0029457	0.320391	not_sig	-0.013907	0.0046721	-0.0027635	0.0040313	0.0628851	not_sig
11	65405600	T	G	HDL	-0.021	0.002	5.009e-25	-0.0189	0.0023	1.55e-16	0.2962	not_sig	-0.00701171	0.00361787	0.00136976	0.00332334	0.0848394	not_sig	0.0132086	0.00375066	0.0233775	0.00333933	0.041963	not_sig	0.0015334	0.0011712	0.0010903	0.0015081	0.62061	not_sig	0.0030716	0.0023654	0.0019612	0.0020639	0.737907	not_sig
11	66066993	T	G	HDL	-0.0094	0.0016	1.103e-08	-0.0119	0.0018	8.175e-11	0.7101	not_sig	NA	NA	NA	NA	NA	NA	NA	NA	NA	NA	NA	NA	0.0012204	0.00096638	0.0007001	0.0012433	0.568977	not_sig	0.0034708	0.0019518	0.0022607	0.0017015	0.660301	not_sig
11	67372946	A	G	HDL	-0.0083	0.0019	1.594e-05	-0.016	0.0022	2.223e-13	0.02662	not_sig	0.00369198	0.00329741	0.0020051	0.00302074	0.703196	not_sig	0.0137463	0.00341894	0.0102803	0.00303544	0.446394	not_sig	0.00024429	0.0010693	0.0010986	0.001373	0.709673	not_sig	0.0053275	0.0021596	0.0022077	0.001879	0.273634	not_sig
11	68597886	T	G	HDL	0.0112	0.0017	7.816e-11	0.0181	0.002	2.789e-20	0.0371	not_sig	-0.01449	0.00316498	-0.00978366	0.00289747	0.267938	not_sig	0.00498237	0.00328149	0.00308214	0.00291181	0.663526	not_sig	-0.0015208	0.0010256	-1.8629e-05	0.0013164	0.266525	not_sig	0.0034479	0.0020714	2.1348e-05	0.0018016	0.19289	not_sig
11	75455309	A	G	HDL	-0.0227	0.002	5.42e-30	-0.0375	0.0023	2.478e-60	0.0001066	not_sig	0.0100257	0.00402952	0.00478217	0.0036808	0.331832	not_sig	-0.00215344	0.00417825	0.00482195	0.00369845	0.209266	not_sig	0.001777	0.0013077	-0.00045068	0.0016735	0.225714	not_sig	-0.0019386	0.0026412	0.0018888	0.0022902	0.241045	not_sig
11	76156973	A	G	HDL	-0.0109	0.0018	1.797e-09	-0.0074	0.002	0.0002134	0.4786	not_sig	0.000950077	0.00315953	0.00431346	0.00289811	0.428145	not_sig	0.00339842	0.00327582	0.00464852	0.00291232	0.774526	not_sig	-0.00022672	0.0010201	8.6416e-05	0.0013115	0.831512	not_sig	-0.0017621	0.0020603	-0.0040553	0.0017949	0.338256	not_sig
11	77198233	T	C	HDL	-0.0121	0.002	2.614e-09	-0.0099	0.0022	7.474e-06	0.5338	not_sig	-0.000558732	0.00341311	-9.00717e-05	0.003139	0.91869	not_sig	0.00443552	0.00353927	-0.00424563	0.00315388	0.0658688	not_sig	0.00069287	0.0011071	-0.00045871	0.0014272	0.489271	not_sig	-0.0037518	0.002236	0.0016448	0.0019532	0.0539537	not_sig
11	95311260	T	G	HDL	-0.0112	0.0021	1.419e-07	-0.0144	0.0024	2.728e-09	0.4135	not_sig	0.0050938	0.00374273	0.00168755	0.00344942	0.499069	not_sig	-0.0051524	0.00388049	-0.000135854	0.00346612	0.332842	not_sig	-0.0010463	0.0012114	0.00052967	0.0015645	0.37761	not_sig	-0.0022663	0.0024468	-0.0025232	0.0021411	0.900322	not_sig
11	103873662	A	C	HDL	-0.0114	0.0023	5.199e-07	-0.0132	0.0025	1.924e-07	0.5261	not_sig	0.00351502	0.00407828	0.00549881	0.00374345	0.717386	not_sig	-0.00222577	0.00422942	0.000875325	0.00376159	0.582115	not_sig	0.0026975	0.0013229	0.00046445	0.0017019	0.175893	not_sig	-0.0013554	0.002672	-0.00017095	0.0023292	0.729328	not_sig
11	109966513	A	C	HDL	-0.0174	0.0018	1.344e-22	-0.0162	0.002	1.946e-15	0.5693	not_sig	-0.000696785	0.00319417	0.000377219	0.0029329	0.802464	not_sig	0.00242389	0.00331146	0.000435899	0.00294689	0.652386	not_sig	-0.0019011	0.001036	-0.0025185	0.0013337	0.922578	not_sig	-0.0027097	0.0020924	-0.004205	0.0018253	0.518615	not_sig
11	111861156	T	C	HDL	-0.006	0.0016	0.0002952	-0.0119	0.0019	2.174e-10	0.05898	not_sig	0.00380215	0.0030231	0.000176843	0.00277532	0.372246	not_sig	0.0165872	0.00313419	0.0280206	0.00278852	0.00619197	not_sig	NA	NA	NA	NA	NA	NA	NA	NA	NA	NA	NA	NA
11	116014665	T	C	HDL	-0.2083	0.0671	0.001923	-0.3725	0.0653	1.19e-08	0.0776	not_sig	0.0486615	0.130614	0.144562	0.122502	0.588553	not_sig	-0.18062	0.135453	0.137301	0.123099	0.0810458	not_sig	NA	NA	NA	NA	NA	NA	NA	NA	NA	NA	NA	NA
2	48962291	T	G	HDL	0.005	0.002	0.01262	0.0265	0.0023	1.681e-31	1.462e-12	sig	-0.00945245	0.00343943	-0.00465277	0.00315299	0.298804	not_sig	-0.00365793	0.00357812	-0.0272623	0.00317036	7.07407e-07	sig	0.0030518	0.0011191	-0.0022607	0.0014388	0.00174561	not_sig	0.0021557	0.0022673	0.0017325	0.0019763	0.908409	not_sig
11	117220429	A	C	HDL	0.6918	0.0245	1.44e-175	0.6117	0.0304	4.39e-90	0.004733	not_sig	-0.0694524	0.0463305	0.0236531	0.0457303	0.148553	not_sig	0.0407146	0.0480469	0.113616	0.0459532	0.270729	not_sig	NA	NA	NA	NA	NA	NA	NA	NA	NA	NA	NA	NA
11	118122491	T	C	HDL	0.1632	0.0353	3.732e-06	0.18	0.034	1.233e-07	0.9553	not_sig	-0.00180176	0.0622665	-0.0518232	0.0583792	0.553884	not_sig	-0.0377638	0.064433	-0.00652733	0.0586638	0.718805	not_sig	NA	NA	NA	NA	NA	NA	NA	NA	NA	NA	NA	NA
11	118928249	A	G	HDL	0.0148	0.0017	4.255e-18	0.0171	0.0019	6.209e-19	0.8106	not_sig	-0.0145796	0.00300105	-0.013093	0.00275578	0.712476	not_sig	-0.00691999	0.00311148	-0.0102232	0.00276921	0.425725	not_sig	0.00039237	0.00097231	-0.00035257	0.0012514	0.61936	not_sig	-0.0035964	0.0019638	-0.0020781	0.0017126	0.572736	not_sig
11	121801129	T	C	HDL	-0.0117	0.0017	1.172e-11	-0.007	0.002	0.0003322	0.06796	not_sig	0.00592448	0.00299455	0.00981856	0.00274612	0.333023	not_sig	0.0092148	0.00310469	0.00372816	0.00275929	0.184591	not_sig	-0.0022259	0.00097385	-0.0016282	0.001251	0.400754	not_sig	-0.002949	0.0019669	-0.0015976	0.001712	0.612152	not_sig
11	122517803	A	G	HDL	0.0251	0.0016	2.54e-54	0.0211	0.0019	9.457e-30	0.05471	not_sig	0.0101726	0.00300254	0.0135228	0.00276406	0.407012	not_sig	-0.000127029	0.00311335	-0.000330683	0.00277726	0.960896	not_sig	0.0018548	0.00097329	0.002147	0.0012554	0.787525	not_sig	-0.0019203	0.0019658	-0.0019906	0.0017181	0.944068	not_sig
11	126225876	C	G	HDL	-0.034	0.0031	1.501e-27	-0.0371	0.0035	4.067e-26	0.9814	not_sig	-0.000156992	0.00566194	0.0103274	0.00520653	0.168591	not_sig	-0.00696393	0.00587196	-0.00207615	0.005231	0.532445	not_sig	-0.0029559	0.0018347	0.00074991	0.0023641	0.152138	not_sig	-0.0042028	0.0037056	-0.0010995	0.0032354	0.518326	not_sig
12	2908330	A	C	HDL	-0.0322	0.0055	3.896e-09	-0.0289	0.0065	8.632e-06	0.9109	not_sig	-0.0143827	0.00837559	-0.00222599	0.00768582	0.280067	not_sig	0.0569188	0.00868132	0.0251112	0.00770357	0.00591245	not_sig	-0.0020929	0.002722	0.0043391	0.0034975	0.15384	not_sig	0.0017561	0.0054821	-0.0011853	0.0047832	0.666576	not_sig
12	4388084	C	G	HDL	0.0096	0.0018	8.54e-08	0.009	0.0021	1.833e-05	0.7239	not_sig	0.00189973	0.00297748	0.00431824	0.00273817	0.545913	not_sig	0.00474252	0.00308711	-0.00490065	0.00274471	0.0190399	not_sig	-0.00084396	0.00096679	-0.00015773	0.0012452	0.567086	not_sig	-0.004499	0.001947	-0.00048469	0.0017029	0.107619	not_sig
12	6713450	A	G	HDL	-0.0155	0.002	1.797e-14	-0.0173	0.0023	6.375e-14	0.8888	not_sig	0.0017499	0.00383262	0.00714645	0.00351654	0.294667	not_sig	-0.00225778	0.00397353	-0.00262326	0.00352506	0.944903	not_sig	-0.0013833	0.0012434	0.00064898	0.0015975	0.26389	not_sig	0.0059118	0.0025042	-0.003945	0.0021847	0.00157529	not_sig
12	7681181	T	G	HDL	-0.0202	0.0021	3.746e-21	-0.0201	0.0024	2.431e-16	0.1379	not_sig	-0.0040889	0.00440525	-0.00328924	0.00404339	0.892551	not_sig	-0.00610547	0.00456727	-0.00431839	0.00405342	0.768804	not_sig	-0.0010909	0.0014107	-0.00047601	0.0018143	0.685401	not_sig	0.0015672	0.0028411	-0.00094772	0.0024813	0.477986	not_sig
12	9082581	A	G	HDL	-0.0256	0.0026	1.705e-22	-0.03	0.003	3.416e-24	0.4698	not_sig	-0.000995395	0.00482476	0.0047042	0.00443879	0.379883	not_sig	-0.00874206	0.00500201	-0.00367411	0.00444921	0.447028	not_sig	0.0013695	0.0015677	-0.0031617	0.0020206	0.0841831	not_sig	-0.0044268	0.0031573	-0.00051366	0.0027634	0.333867	not_sig
12	13345397	T	G	HDL	0.0103	0.0023	9.93e-06	0.0133	0.0026	3.078e-07	0.5716	not_sig	-0.00291961	0.00434935	0.00279474	0.00399325	0.328308	not_sig	-0.00165569	0.00450909	-0.0100175	0.00400302	0.163646	not_sig	0.0027203	0.001399	-0.0013548	0.0018012	0.0476316	not_sig	0.00016256	0.0028175	-0.0005643	0.0024634	0.832913	not_sig
12	16503789	T	G	HDL	-0.131	0.0163	9.467e-16	-0.1284	0.0233	3.828e-08	0.7868	not_sig	NA	NA	NA	NA	NA	NA	NA	NA	NA	NA	NA	NA	NA	NA	NA	NA	NA	NA	NA	NA	NA	NA	NA	NA
12	20470221	A	C	HDL	0.0257	0.0021	1.901e-35	0.0277	0.0023	4.541e-33	0.4889	not_sig	0.00770059	0.00370273	0.00854381	0.00340254	0.865507	not_sig	0.000910103	0.00383849	-0.0183414	0.00341006	0.000165864	not_sig	0.0013525	0.0011963	0.0017193	0.0015398	0.926727	not_sig	0.0019892	0.0024093	0.0047874	0.0021058	0.319741	not_sig
12	26440698	A	G	HDL	-0.0104	0.0018	1.007e-08	-0.0131	0.002	1.403e-10	0.2111	not_sig	-0.00195597	0.00341073	-0.00617643	0.00313152	0.357231	not_sig	0.0129264	0.00353645	0.0492684	0.0031388	1.16621e-14	sig	-0.0020942	0.0011061	-0.0033118	0.0014224	0.875053	not_sig	-0.004943	0.0022276	-0.0040162	0.0019453	0.800979	not_sig
12	33588388	T	C	HDL	-0.0093	0.0018	1.346e-07	-0.0094	0.002	2.173e-06	0.7459	not_sig	0.00688349	0.00297996	0.00253531	0.00273577	0.277624	not_sig	0.0064109	0.00308939	0.0108077	0.00274202	0.285021	not_sig	-0.00052009	0.0009628	-0.00050988	0.0012385	0.898772	not_sig	-0.0011967	0.001939	0.00020376	0.0016937	0.567349	not_sig
12	49399132	C	G	HDL	0.0282	0.0049	7.24e-09	0.0296	0.0056	1.112e-07	0.7077	not_sig	-0.0435538	0.00787894	-0.0257595	0.00725119	0.0932469	not_sig	0.0197826	0.00816954	0.0299773	0.00726599	0.348982	not_sig	0.0022159	0.0025586	-0.0046326	0.0032971	0.106914	not_sig	-0.012572	0.0051528	0.0088643	0.0045091	0.000843816	not_sig
12	50263148	A	G	HDL	0.0145	0.0017	1.527e-17	0.0097	0.0019	5.205e-07	0.02249	not_sig	-0.0344777	0.00300549	-0.0254788	0.00276405	0.0260132	not_sig	0.00135055	0.00311574	0.00775729	0.00277055	0.122734	not_sig	0.00099894	0.00097816	0.001634	0.0012597	0.909123	not_sig	0.0031245	0.00197	0.001209	0.0017227	0.460364	not_sig
12	51211692	A	G	HDL	0.0078	0.0016	1.393e-06	0.0128	0.0019	6.281e-12	0.4183	not_sig	0.00121354	0.00298124	0.00325496	0.00272473	0.60968	not_sig	-0.00538268	0.00309086	0.00205394	0.00273122	0.0701549	not_sig	5.7335e-05	0.0009669	-0.00016742	0.001238	0.891171	not_sig	0.0014443	0.0019473	0.00043812	0.0016931	0.69097	not_sig
12	53796744	T	C	HDL	-0.0156	0.0018	5.788e-18	-0.0106	0.0022	1.131e-06	0.06409	not_sig	0.000258613	0.00297154	0.00523024	0.00272913	0.213268	not_sig	0.0140272	0.00308091	0.00131146	0.00273551	0.0019358	not_sig	NA	NA	NA	NA	NA	NA	NA	NA	NA	NA	NA	NA
12	56470625	T	C	HDL	0.0089	0.0017	1.029e-07	0.0129	0.0019	1.47e-11	0.5395	not_sig	-0.0138564	0.00295341	-0.0101184	0.00270653	0.345946	not_sig	0.0019626	0.00306164	-0.00610226	0.00271292	0.0476783	not_sig	0.00055519	0.000959	0.00027323	0.0012311	0.774577	not_sig	-0.0069501	0.0019313	-0.0061848	0.0016835	0.858315	not_sig
12	57823585	A	C	HDL	0.0258	0.0019	2.972e-40	0.0315	0.0022	5.068e-47	0.342	not_sig	0.00737363	0.00341725	0.00462167	0.00312704	0.548451	not_sig	-0.000741777	0.0035427	0.00186334	0.00313443	0.580151	not_sig	0.00059518	0.0011084	-0.0012861	0.0014203	0.306711	not_sig	0.0034017	0.0022323	0.001145	0.0019424	0.438645	not_sig
12	89674799	T	C	HDL	-0.01	0.0017	7.842e-09	-0.0109	0.002	2.905e-08	0.9621	not_sig	NA	NA	NA	NA	NA	NA	NA	NA	NA	NA	NA	NA	NA	NA	NA	NA	NA	NA	NA	NA	NA	NA	NA	NA
12	101867997	A	G	HDL	-0.0104	0.0017	9.774e-10	-0.0118	0.0019	1.302e-09	0.7377	not_sig	-0.00150718	0.0031056	0.00357341	0.00285348	0.223694	not_sig	5.85545e-05	0.00321968	0.002326	0.00286007	0.59692	not_sig	-0.0018728	0.0010076	-0.001204	0.0012967	0.441302	not_sig	0.0011838	0.0020292	-0.00055352	0.0017734	0.493978	not_sig
12	107100717	T	C	HDL	-0.006	0.0017	0.0003382	-0.0141	0.0018	2.101e-14	0.01777	not_sig	-0.00177286	0.00293146	0.00217654	0.0026896	0.316007	not_sig	0.010248	0.00303916	0.0164097	0.0026956	0.127641	not_sig	-0.0014995	0.00094988	-0.00036985	0.0012206	0.324098	not_sig	0.0018294	0.001913	-0.00076379	0.0016693	0.27909	not_sig
12	109057037	A	T	HDL	-0.0092	0.0018	4.828e-07	-0.0144	0.0021	6.682e-12	0.3809	not_sig	-0.00948832	0.00319409	0.00395627	0.0029294	0.00172853	not_sig	-0.000889934	0.00331147	-0.0018431	0.00293643	0.828745	not_sig	0.00010321	0.0010356	0.0023377	0.0013302	0.261944	not_sig	-0.0020812	0.0020857	-0.0038777	0.0018192	0.450469	not_sig
12	109920071	T	G	HDL	-0.0261	0.0016	4.966e-60	-0.0316	0.0018	2.439e-67	0.141	not_sig	-0.00955034	0.00292829	-0.00812059	0.0026841	0.716197	not_sig	0.000706635	0.00303592	0.00460417	0.00269032	0.334511	not_sig	7.6594e-05	0.00094967	0.0012164	0.0012194	0.536295	not_sig	-0.0030563	0.0019126	-0.0012757	0.0016677	0.481139	not_sig
12	111344621	T	G	HDL	0.1349	0.0079	1.804e-65	0.0155	0.009	0.08668	0.0209	not_sig	NA	NA	NA	NA	NA	NA	NA	NA	NA	NA	NA	NA	NA	NA	NA	NA	NA	NA	NA	NA	NA	NA	NA	NA
12	111884608	T	C	HDL	0.0225	0.0017	4.619e-38	0.0238	0.002	1.38e-32	0.8423	not_sig	0.00744791	0.00292547	0.00808459	0.00268241	0.871289	not_sig	-0.00790987	0.00303295	-0.0140205	0.00268875	0.129957	not_sig	0.0001772	0.00095044	8.2504e-05	0.0012208	0.924448	not_sig	-0.006681	0.0019141	-0.0044944	0.0016695	0.423298	not_sig
12	113409176	A	G	HDL	0.1024	0.0087	4.815e-32	0.0292	0.0077	0.0001407	0.0005459	not_sig	NA	NA	NA	NA	NA	NA	NA	NA	NA	NA	NA	NA	NA	NA	NA	NA	NA	NA	NA	NA	NA	NA	NA	NA
12	121406293	A	G	HDL	0.0163	0.0016	1.98e-24	0.0138	0.0018	5.415e-14	0.03151	not_sig	NA	NA	NA	NA	NA	NA	NA	NA	NA	NA	NA	NA	NA	NA	NA	NA	NA	NA	NA	NA	NA	NA	NA	NA
12	122381427	A	C	HDL	0.0176	0.0039	5.826e-06	0.0235	0.0043	3.545e-08	0.2919	not_sig	0.0229928	0.00623107	0.0242714	0.00570094	0.878465	not_sig	-0.00806472	0.00646015	-0.0338163	0.00571461	0.00270985	not_sig	-0.00058931	0.0019245	-0.0013773	0.0024659	0.882082	not_sig	-0.0041051	0.0038759	0.0061762	0.0033724	0.0311946	not_sig
2	48962291	T	G	logTG	-0.0026	0.002	0.1875	-0.0228	0.0022	2.711e-24	1.301e-09	sig	-0.00945245	0.00343943	-0.00465277	0.00315299	0.298804	not_sig	-0.00365793	0.00357812	-0.0272623	0.00317036	7.07407e-07	sig	0.0030518	0.0011191	-0.0022607	0.0014388	0.00174561	not_sig	0.0021557	0.0022673	0.0017325	0.0019763	0.908409	not_sig
12	123804721	C	G	HDL	-0.0468	0.0025	2.953e-78	-0.0359	0.0028	2.414e-37	5.943e-05	sig	0.000749994	0.0050324	0.00141193	0.00463786	0.922174	not_sig	0.00144781	0.00521737	-0.011498	0.00464931	0.0627917	not_sig	0.00025332	0.001633	-0.00089643	0.0021067	0.68362	not_sig	-0.0011775	0.0032888	-0.00064386	0.0028812	0.905101	not_sig
12	124409502	A	G	HDL	-0.0249	0.0018	1.196e-45	-0.0385	0.002	7.304e-82	0.0005704	not_sig	-0.0092969	0.00314729	-0.015304	0.00289122	0.155688	not_sig	0.016803	0.003263	0.0639403	0.00289813	2.02621e-27	sig	0.0018798	0.0010196	-3.7792e-05	0.0013122	0.158119	not_sig	0.0002835	0.0020534	0.00087348	0.0017946	0.807691	not_sig
12	125325010	C	G	HDL	-0.0526	0.0027	2.299e-85	-0.0676	0.003	7.77e-116	0.0217	not_sig	0.00194468	0.00458915	0.00236996	0.00421852	0.94506	not_sig	0.00577263	0.0047572	0.0153769	0.00422832	0.129609	not_sig	-0.000411	0.0014492	0.0029279	0.0018657	0.199	not_sig	0.0035324	0.0029186	0.0013049	0.0025516	0.561261	not_sig
13	28687084	T	C	HDL	-0.0099	0.0018	5.119e-08	-0.0153	0.0021	3.136e-13	0.2532	not_sig	0.00410912	0.00357272	0.0162793	0.00326217	0.0110591	not_sig	0.000400714	0.00370177	0.000146294	0.00328065	0.958797	not_sig	-0.00067773	0.0011505	-0.00099559	0.0014731	0.988948	not_sig	0.001874	0.002316	0.0012217	0.0020123	0.84156	not_sig
13	41635301	C	G	HDL	-0.0209	0.0034	5.292e-10	-0.0255	0.0038	2.414e-11	0.7914	not_sig	-0.00426378	0.00558397	-0.00322976	0.0051188	0.89034	not_sig	0.00552307	0.00578569	0.0090097	0.00514983	0.651177	not_sig	-0.0010039	0.0018048	-0.0028173	0.0023198	0.683689	not_sig	-0.0027005	0.0036332	0.0026591	0.003169	0.233864	not_sig
13	45492138	T	G	HDL	-0.0226	0.0052	1.346e-05	-0.0272	0.0058	2.774e-06	0.656	not_sig	NA	NA	NA	NA	NA	NA	NA	NA	NA	NA	NA	NA	NA	NA	NA	NA	NA	NA	NA	NA	NA	NA	NA	NA
13	50707087	C	G	HDL	-0.0316	0.0062	3.173e-07	-0.0316	0.0067	2.464e-06	0.9108	not_sig	-0.0159782	0.0102492	0.00227651	0.00933932	0.183609	not_sig	0.0392125	0.010622	0.0468375	0.00939369	0.589123	not_sig	-0.0011957	0.0033099	-0.0021094	0.0042326	0.94805	not_sig	-0.017584	0.0066629	-0.00058067	0.005782	0.0446686	not_sig
13	51214613	A	G	HDL	-0.0165	0.0024	3.265e-12	-0.0165	0.0027	1.164e-09	0.9876	not_sig	-0.00888939	0.00453247	0.00387486	0.00414446	0.0357996	not_sig	0.0333884	0.00469663	0.0420468	0.00416818	0.166076	not_sig	-0.0029757	0.0014644	1.2557e-05	0.0018775	0.123283	not_sig	0.0022032	0.0029479	0.0031709	0.0025648	0.761734	not_sig
13	58391491	T	C	HDL	-0.01	0.0019	1.092e-07	-0.0102	0.0021	1.686e-06	0.8026	not_sig	0.00857068	0.0032658	0.0146573	0.00299927	0.165597	not_sig	0.000326242	0.00338345	0.00373339	0.00301671	0.450281	not_sig	-0.00060773	0.0010564	-0.0011493	0.0013599	0.886958	not_sig	0.0017839	0.0021265	0.0041351	0.0018577	0.342295	not_sig
13	113927208	T	G	HDL	-0.0159	0.0021	3.798e-14	-0.0161	0.0025	1.167e-10	0.6449	not_sig	NA	NA	NA	NA	NA	NA	NA	NA	NA	NA	NA	NA	0.00063171	0.0011381	-0.0017993	0.0014643	0.208805	not_sig	-0.00092903	0.0022911	0.0032729	0.0020004	0.133374	not_sig
14	33175822	A	G	HDL	-0.0097	0.0017	2.125e-08	-0.0095	0.0019	1.128e-06	0.4867	not_sig	NA	NA	NA	NA	NA	NA	NA	NA	NA	NA	NA	NA	-0.00070886	0.0009752	-0.0030144	0.0012577	0.276566	not_sig	0.00055215	0.0019636	0.00076369	0.0017186	0.919765	not_sig
14	52493161	T	C	HDL	-0.0036	0.0018	0.05393	-0.0034	0.0021	0.1041	0.8912	not_sig	-0.000734927	0.0033254	-0.00335873	0.00304604	0.556753	not_sig	0.00957534	0.00344533	0.00620085	0.00306194	0.462136	not_sig	0.0005581	0.0010754	8.9456e-05	0.0013813	0.727839	not_sig	-0.0039103	0.0021652	0.0012265	0.0018874	0.0587991	not_sig
14	65870594	T	G	HDL	-0.0086	0.0017	6.015e-07	-0.0118	0.002	2.035e-09	0.3505	not_sig	0.00758695	0.00312414	0.0106956	0.00286626	0.458947	not_sig	-0.00393819	0.00323699	0.000357372	0.00288088	0.319413	not_sig	-0.0001996	0.00101	-0.0016236	0.0012993	0.48224	not_sig	-0.00069413	0.0020336	0.00063076	0.0017754	0.599584	not_sig
14	69149372	A	G	HDL	0.0156	0.003	3.037e-07	0.0277	0.0034	5.402e-16	0.01986	not_sig	0.0104955	0.00581007	-0.00726217	0.00533364	0.0229571	not_sig	-0.0055886	0.00601907	-0.00509249	0.00536205	0.95071	not_sig	-0.0018762	0.0018513	0.0026229	0.0023843	0.129706	not_sig	0.001198	0.0037275	-0.0023542	0.0032579	0.43838	not_sig
14	70833819	C	G	HDL	-0.0109	0.0016	1.489e-11	-0.01	0.0018	4.914e-08	0.9341	not_sig	-0.00079458	0.00293432	-0.000346763	0.00269831	0.909661	not_sig	-0.00357194	0.00304011	0.00131487	0.0027124	0.228304	not_sig	-0.00018075	0.00094816	-0.001511	0.001222	0.483907	not_sig	0.0011918	0.0019091	-0.00057746	0.0016698	0.459046	not_sig
14	74250126	T	C	HDL	0.0143	0.0018	4.226e-15	0.0219	0.0021	6.544e-25	0.01026	not_sig	NA	NA	NA	NA	NA	NA	NA	NA	NA	NA	NA	NA	-0.00055863	0.0010752	0.00097946	0.0013856	0.381916	not_sig	-0.0041827	0.0021649	-1.0708e-05	0.0018933	0.130177	not_sig
14	75299101	A	G	HDL	0.0066	0.0016	4.778e-05	0.0126	0.0018	7.234e-12	0.09024	not_sig	-0.00522251	0.00293645	-0.00434563	0.00268953	0.823984	not_sig	-7.16051e-05	0.00304221	-0.0100269	0.00270341	0.0140134	not_sig	0.002604	0.0009494	0.00051596	0.0012193	0.0743833	not_sig	-0.0031228	0.0019116	-0.0027564	0.001666	0.927643	not_sig
14	79939993	A	G	HDL	0.0129	0.002	2.339e-10	0.0092	0.0023	7.399e-05	0.3271	not_sig	-0.0339165	0.00353205	-0.023663	0.00323333	0.0305571	not_sig	-0.00816863	0.0036593	0.00492222	0.00325018	0.00722008	not_sig	0.0023199	0.0011425	0.0015564	0.0014659	0.416702	not_sig	0.0037253	0.0023005	0.0045552	0.002003	0.714142	not_sig
14	81701004	T	C	HDL	0.0113	0.0019	4.157e-09	0.0132	0.0021	4.609e-10	0.8776	not_sig	-0.00750186	0.00349148	0.00188877	0.00320304	0.0453009	not_sig	0.000649706	0.00361716	-0.0029428	0.00321984	0.456198	not_sig	-0.001204	0.0011272	0.00017175	0.0014488	0.374764	not_sig	-0.00035982	0.0022696	-0.0021361	0.0019797	0.512749	not_sig
14	89804507	T	C	HDL	0.0122	0.002	6.726e-10	0.0165	0.0023	9.189e-13	0.08725	not_sig	0.0049894	0.00371585	-0.00847271	0.00342297	0.0071148	not_sig	0.00960117	0.00384972	0.013075	0.00344109	0.499205	not_sig	0.00063618	0.0012001	0.0006639	0.0015495	0.914865	not_sig	0.0016715	0.0024165	-0.00041325	0.0021172	0.493888	not_sig
14	92504973	T	TA	HDL	0.0084	0.0019	1.403e-05	0.0112	0.0023	1.187e-06	0.5624	not_sig	0.00432257	0.0034365	0.00264361	0.00315453	0.716203	not_sig	-0.00873963	0.00356054	-0.00507212	0.00317054	0.439725	not_sig	NA	NA	NA	NA	NA	NA	NA	NA	NA	NA	NA	NA
14	100359294	T	C	HDL	-0.0107	0.0019	3.617e-08	-0.0108	0.0022	9.438e-07	0.7071	not_sig	0.00396704	0.00383671	0.00315766	0.00352875	0.875378	not_sig	0.000611753	0.0039752	-0.00308723	0.00354699	0.485571	not_sig	-0.0019556	0.0012418	-0.00094832	0.0016001	0.433175	not_sig	0.0012026	0.0025004	-0.00080127	0.0021864	0.520348	not_sig
14	101194561	A	G	HDL	-0.0111	0.0018	6.782e-10	-0.0087	0.0021	3.039e-05	0.1128	not_sig	NA	NA	NA	NA	NA	NA	NA	NA	NA	NA	NA	NA	-0.0012307	0.0010533	-0.0011836	0.0013557	0.774396	not_sig	-0.0037462	0.0021208	0.00050719	0.0018524	0.112725	not_sig
14	103307655	C	G	HDL	0.0148	0.0019	3.758e-15	0.0103	0.0021	1.553e-06	0.02151	not_sig	-0.0164241	0.00365531	-0.0196881	0.00336154	0.506769	not_sig	-0.00364192	0.00378757	-0.00480935	0.00337927	0.817308	not_sig	-0.0004508	0.0011818	0.0020826	0.0015225	0.222036	not_sig	-0.0038654	0.0023795	-0.0051042	0.0020803	0.618446	not_sig
14	105258437	T	G	HDL	0.0226	0.0017	9.438e-39	0.0329	0.002	2.383e-60	2.104e-05	sig	-0.000386049	0.00302865	-0.00660789	0.00277515	0.126052	not_sig	-0.00514372	0.003138	-0.00388037	0.00278947	0.762479	not_sig	0.0021014	0.00097733	0.0017901	0.0012548	0.513533	not_sig	0.00095877	0.0019679	-0.00091192	0.0017146	0.442981	not_sig
15	23932467	A	G	HDL	-0.0088	0.0017	1.448e-07	-0.0103	0.0019	4.937e-08	0.7173	not_sig	0.0113121	0.00299671	0.00848062	0.00275182	0.482089	not_sig	-0.00187911	0.00310268	-0.00200864	0.00276554	0.975028	not_sig	-0.00034121	0.00095848	-0.00067485	0.0012331	0.916898	not_sig	-0.0020882	0.001929	0.0015868	0.0016842	0.125607	not_sig
15	39447529	A	G	HDL	0.0077	0.002	0.0001647	0.0136	0.0023	3.986e-09	0.1876	not_sig	0.010188	0.00423548	0.00365319	0.0038747	0.250217	not_sig	0.00481203	0.00438512	-0.0209893	0.00389326	9.89958e-06	sig	-0.00086961	0.001342	0.00066617	0.0017188	0.450958	not_sig	0.0033306	0.0027009	-0.00012794	0.0023477	0.312256	not_sig
15	40751555	A	C	HDL	-0.0091	0.0017	3.765e-08	-0.0118	0.0019	5.739e-10	0.07913	not_sig	0.00268837	0.00293513	-0.00421579	0.00269369	0.0800382	not_sig	-0.00112683	0.00303889	0.010515	0.0027072	0.00406432	not_sig	0.0012908	0.00095189	-0.0013928	0.0012238	0.0718938	not_sig	0.0032969	0.0019157	0.0022634	0.0016715	0.707615	not_sig
15	41888918	A	G	HDL	0.0112	0.0018	7.024e-10	0.0172	0.0021	6.459e-17	0.1572	not_sig	-0.00432845	0.00317553	0.000258792	0.00291406	0.282359	not_sig	-0.00321515	0.00328777	-0.0170726	0.00292883	0.00157184	not_sig	0.0011126	0.0010253	0.0035724	0.0013184	0.304245	not_sig	-0.0028677	0.0020634	-0.0019776	0.0018008	0.764713	not_sig
15	43820717	T	C	HDL	0.0881	0.0054	1.453e-59	0.1236	0.0062	3.81e-88	0.002551	not_sig	0.0336278	0.00931639	0.0202958	0.00850167	0.285668	not_sig	0.00395253	0.00964333	-0.0270268	0.00854567	0.0157391	not_sig	-0.0019141	0.0030371	-0.0026749	0.0038818	0.992716	not_sig	0.0013423	0.0061124	-0.0084356	0.0053019	0.187298	not_sig
15	53001538	T	C	HDL	0.0097	0.002	8.889e-07	0.0091	0.0022	4.822e-05	0.5639	not_sig	-0.00209817	0.0036229	-0.00272054	0.0033245	0.898271	not_sig	-0.00726739	0.00375097	-0.00633272	0.00334099	0.851744	not_sig	-0.0003858	0.001152	0.00074589	0.0014808	0.551038	not_sig	0.0033781	0.0023184	-0.0024589	0.0020226	0.0429965	not_sig
15	57254842	A	T	HDL	-0.0117	0.0018	2.08e-10	-0.0078	0.0021	0.0001669	0.1357	not_sig	0.0141302	0.0033651	2.44096e-05	0.00308744	0.00180986	not_sig	0.00365598	0.00348431	0.0103607	0.00310279	0.148907	not_sig	-0.00012729	0.0010887	0.00054299	0.0013993	0.724287	not_sig	-0.0035308	0.002191	0.00045341	0.0019112	0.150284	not_sig
15	57920703	A	G	HDL	0.0076	0.0016	2.344e-06	0.0118	0.0018	1.331e-10	0.4409	not_sig	-0.00764563	0.00300942	0.00379009	0.00276023	0.00467553	not_sig	-0.000579236	0.00311582	0.00430343	0.00277405	0.239766	not_sig	0.00014302	0.00096736	4.5934e-05	0.0012429	0.931058	not_sig	-0.00015357	0.0019468	-0.00018403	0.0016977	0.987047	not_sig
15	58680178	T	C	HDL	0.1011	0.0016	4.30e-831	0.1041	0.0019	5.16e-684	0.03446	not_sig	0.00249382	0.0030643	-0.00290034	0.00281713	0.190557	not_sig	-0.00292114	0.00317265	-0.00333002	0.00283114	0.923058	not_sig	0.0013189	0.00099028	-0.00024939	0.0012752	0.254887	not_sig	-0.001982	0.001993	-0.00036558	0.0017418	0.528958	not_sig
15	59277019	T	C	HDL	0.3034	0.0249	3.012e-34	0.3173	0.0254	1.019e-35	0.2658	not_sig	-0.138111	0.0765724	0.0364866	0.0684211	0.0859202	not_sig	-0.0411746	0.0792951	-0.0187966	0.0687679	0.830437	not_sig	NA	NA	NA	NA	NA	NA	NA	NA	NA	NA	NA	NA
15	59780362	C	G	HDL	0.1552	0.0248	3.845e-10	0.151	0.0326	3.576e-06	0.2728	not_sig	NA	NA	NA	NA	NA	NA	NA	NA	NA	NA	NA	NA	NA	NA	NA	NA	NA	NA	NA	NA	NA	NA	NA	NA
15	61947280	C	G	HDL	0.0087	0.0016	8.477e-08	0.0107	0.0019	9.999e-09	0.8337	not_sig	0.000798375	0.00297344	-0.00327824	0.0027301	0.307707	not_sig	0.00204071	0.00307832	-0.0117821	0.00274367	0.00076004	not_sig	0.0008208	0.00095953	-0.0013992	0.0012344	0.155999	not_sig	0.0036827	0.0019311	-0.00062846	0.0016861	0.0770146	not_sig
15	63344167	A	G	HDL	-0.012	0.0018	1.177e-11	-0.0206	0.002	7.277e-25	0.01614	not_sig	-0.00282168	0.00325907	0.00712364	0.00298638	0.0230576	not_sig	-0.0082128	0.00337402	0.00535301	0.00300116	0.00254914	not_sig	-0.00049522	0.0010432	0.00044896	0.0013388	0.557114	not_sig	-0.0015235	0.0020996	-0.00049779	0.0018286	0.707988	not_sig
15	63910433	T	G	HDL	-0.0117	0.0019	3.208e-10	-0.0138	0.0023	1.168e-09	0.7892	not_sig	-0.00105744	0.00320213	0.00515871	0.00293199	0.148141	not_sig	0.00900707	0.00331554	0.0174728	0.00294666	0.0552431	not_sig	NA	NA	NA	NA	NA	NA	NA	NA	NA	NA	NA	NA
15	66877172	A	G	HDL	-0.01	0.0016	1.116e-09	-0.0113	0.0019	1.678e-09	0.8218	not_sig	-0.0031112	0.00296158	-0.0051243	0.00271293	0.61267	not_sig	-0.00805866	0.00306621	0.000721203	0.00272628	0.031608	not_sig	-0.00032389	0.00095719	0.0013122	0.0012285	0.325596	not_sig	0.001555	0.0019264	0.0031934	0.0016779	0.460395	not_sig
15	68014971	T	C	HDL	0.0082	0.0017	9.803e-07	0.0104	0.0019	3.679e-08	0.9488	not_sig	-0.018348	0.00293295	-0.0143262	0.00268954	0.307346	not_sig	-0.0129688	0.00303661	0.00420328	0.00270303	2.20927e-05	sig	0.0012276	0.00094823	0.0036361	0.0012179	0.291226	not_sig	-0.005546	0.0019083	-0.0043811	0.0016636	0.700478	not_sig
15	70182851	A	G	HDL	0.0372	0.005	7.113e-14	0.0302	0.0054	3.063e-08	0.08433	not_sig	0.0170594	0.0504856	-0.100198	0.0472343	0.0866943	not_sig	-0.112576	0.0524304	-0.131639	0.0474738	0.786614	not_sig	NA	NA	NA	NA	NA	NA	NA	NA	NA	NA	NA	NA
15	73431600	T	G	HDL	-0.0089	0.0016	4.455e-08	-0.009	0.0018	1.098e-06	0.7875	not_sig	0.010127	0.00295534	0.0142579	0.00270885	0.297983	not_sig	0.00839544	0.00305981	0.00184154	0.00272229	0.107983	not_sig	0.0003537	0.00095428	-0.0012025	0.0012255	0.34293	not_sig	0.003238	0.0019205	0.0030102	0.0016738	0.977566	not_sig
15	90214777	A	G	HDL	0.1911	0.0353	6.277e-08	0.2257	0.0453	6.256e-07	0.7418	not_sig	0.0996832	0.0581184	0.0811547	0.0563725	0.817199	not_sig	-0.175813	0.0600714	-0.250471	0.0566582	0.36381	not_sig	0.0091681	0.013197	0.013874	0.01762	0.974427	not_sig	0.026332	0.02656	0.0062217	0.024067	0.564995	not_sig
15	96714816	A	C	HDL	-0.0093	0.0018	1.717e-07	-0.016	0.002	3.245e-15	0.04924	not_sig	-0.00617822	0.00330931	-0.0060235	0.00303315	0.972229	not_sig	0.00344214	0.00342594	0.00112545	0.00304827	0.611857	not_sig	-0.00061779	0.0010695	0.0016741	0.001373	0.205204	not_sig	-0.00030774	0.0021524	-0.0013574	0.0018754	0.681875	not_sig
15	99281192	T	C	HDL	-0.0088	0.0016	6.627e-08	-0.01	0.0019	7.488e-08	0.5664	not_sig	0.00629619	0.00307444	0.0110798	0.00283077	0.247623	not_sig	-0.00701174	0.00318263	-0.00297996	0.00284532	0.342831	not_sig	-0.00072379	0.00099323	0.0021019	0.0012815	0.0950142	not_sig	0.0031391	0.0019989	0.0035676	0.0017503	0.80851	not_sig
15	102068658	A	G	HDL	-0.0103	0.0018	1.014e-08	-0.0095	0.0021	5.345e-06	0.4361	not_sig	-0.00267319	0.00338397	-0.00116561	0.00310659	0.74028	not_sig	-0.000706916	0.00350338	-0.00626434	0.00312213	0.234243	not_sig	-7.5851e-05	0.0010926	0.0018773	0.0014051	0.335483	not_sig	0.001226	0.0021988	-0.0040267	0.0019191	0.050686	not_sig
16	1012393	T	C	HDL	0.0132	0.0017	5.249e-14	0.0091	0.002	7.064e-06	0.3157	not_sig	0.00511273	0.0032857	9.83084e-05	0.00301998	0.256411	not_sig	-0.00580885	0.00341164	0.00803975	0.00303798	0.00232762	not_sig	0.0002887	0.0010647	-0.0012919	0.0013708	0.396734	not_sig	0.0017235	0.0021441	0.0022955	0.0018727	0.799386	not_sig
16	2163962	A	G	HDL	0.0077	0.0028	0.006354	0.0146	0.0034	1.721e-05	0.6227	not_sig	-0.0115425	0.00499731	-0.015303	0.00458614	0.575484	not_sig	-0.0130755	0.00518823	-0.0112844	0.00461333	0.79554	not_sig	-0.00077622	0.0016046	0.00038125	0.0020641	0.6233	not_sig	3.758e-05	0.0032312	-0.0050738	0.0028198	0.190558	not_sig
16	4014282	C	G	HDL	-0.0115	0.0017	4.257e-12	-0.008	0.0019	2.682e-05	0.0312	not_sig	0.020744	0.00301752	0.0243998	0.00277008	0.367344	not_sig	-0.00380572	0.00313299	-0.00558027	0.00278663	0.670772	not_sig	-0.001519	0.00097694	-0.0014885	0.0012565	0.713948	not_sig	0.0025889	0.0019673	0.0054655	0.0017165	0.205815	not_sig
16	4677604	A	C	HDL	0.0095	0.0028	0.0005779	0.0207	0.0031	1.431e-11	0.09598	not_sig	NA	NA	NA	NA	NA	NA	NA	NA	NA	NA	NA	NA	0.00065911	0.0014141	0.0016923	0.0018283	0.778206	not_sig	-0.00075116	0.0028477	-0.0012247	0.0024977	0.882129	not_sig
16	11464263	A	G	HDL	-0.0139	0.0021	8.146e-11	-0.0163	0.0024	8.813e-12	0.7954	not_sig	-0.00273851	0.00359398	0.00193664	0.00330287	0.333331	not_sig	-0.00310223	0.00373185	0.00454745	0.00332223	0.124097	not_sig	0.00061128	0.0011555	-0.00043284	0.0014865	0.549877	not_sig	0.0045064	0.0023269	-0.0020832	0.0020308	0.0236011	not_sig
16	15172118	T	C	HDL	0.0192	0.0019	1.809e-23	0.0197	0.0022	1.324e-19	0.6758	not_sig	-0.00068481	0.00321411	-0.00137731	0.00293672	0.872363	not_sig	-0.000780704	0.00333721	-0.00716334	0.00295428	0.150329	not_sig	-0.0010735	0.0010414	-0.0035785	0.0013334	0.296053	not_sig	-0.0011595	0.0020971	-0.0037265	0.0018216	0.299089	not_sig
16	19967822	T	C	HDL	-0.008	0.0024	0.0008247	-0.0176	0.0028	1.973e-10	0.101	not_sig	0.0333029	0.00420204	0.0335814	0.00385026	0.960635	not_sig	-0.00756842	0.00436347	-0.000561959	0.00387355	0.227773	not_sig	0.0018651	0.0013576	0.0036926	0.001743	0.685832	not_sig	-0.0026889	0.0027339	0.0038085	0.0023813	0.0538531	not_sig
16	28865916	A	G	HDL	0.0105	0.0017	7.597e-10	0.0079	0.002	5.919e-05	0.2393	not_sig	-0.0253248	0.00298392	-0.0238013	0.0027397	0.704041	not_sig	-0.000849592	0.00309781	-0.00173598	0.00275584	0.829981	not_sig	0.0042849	0.00096747	0.0027257	0.0012444	0.0641518	not_sig	-0.00045963	0.0019483	0.0013911	0.0017001	0.437439	not_sig
16	29994922	T	C	HDL	0.0121	0.0017	6.943e-13	0.0146	0.0019	1.591e-14	0.6473	not_sig	-0.024599	0.00294091	-0.0240549	0.0027023	0.890555	not_sig	-0.00517515	0.00305301	-0.0104915	0.00271846	0.191467	not_sig	0.0005588	0.00095102	0.0038179	0.0012242	0.0922967	not_sig	0.00019284	0.0019151	-0.003257	0.0016725	0.137166	not_sig
16	31378235	A	G	HDL	0.0081	0.0017	3.723e-06	0.0116	0.002	5.577e-09	0.1638	not_sig	NA	NA	NA	NA	NA	NA	NA	NA	NA	NA	NA	NA	0.001258	0.0010195	0.0018303	0.0013084	0.984226	not_sig	-0.0035809	0.002053	-0.002489	0.0017875	0.712777	not_sig
16	53126338	T	C	HDL	-0.0071	0.0017	1.842e-05	-0.0105	0.0019	2.432e-08	0.07963	not_sig	-0.000175064	0.00307906	0.00570934	0.0028368	0.15571	not_sig	-0.00708111	0.00319675	-0.00206437	0.00285378	0.239646	not_sig	0.0034898	0.00099669	0.00026597	0.0012865	0.0124716	not_sig	-0.00018591	0.0020072	0.00018641	0.0017575	0.881186	not_sig
16	53806453	A	G	HDL	-0.0208	0.0017	2.903e-35	-0.0161	0.0019	3.209e-17	0.032	not_sig	0.0829	0.00297541	0.0696451	0.00273835	0.000930091	not_sig	-0.00381197	0.00308904	-0.000262289	0.00275477	0.38901	not_sig	-0.0017052	0.00096473	-0.00055297	0.001244	0.303143	not_sig	0.0028351	0.0019427	0.0044498	0.0016995	0.454562	not_sig
16	54820862	A	T	HDL	0.2797	0.092	0.002371	0.1076	0.081	0.1841	0.007279	not_sig	-0.00992985	0.100357	0.070141	0.0885774	0.545728	not_sig	-0.0685322	0.104215	0.163592	0.0891119	0.0890753	not_sig	NA	NA	NA	NA	NA	NA	NA	NA	NA	NA	NA	NA
16	55349464	T	C	HDL	0.2646	0.0741	0.0003542	0.2355	0.0655	0.0003261	0.3109	not_sig	0.0282971	0.0866717	0.0425293	0.0849021	0.905681	not_sig	0.000735074	0.0900041	0.00931481	0.0854144	0.944629	not_sig	NA	NA	NA	NA	NA	NA	NA	NA	NA	NA	NA	NA
16	55872708	A	G	HDL	-0.2191	0.0746	0.003327	-0.451	0.0732	7.309e-10	0.0001975	not_sig	-0.0892123	0.0776587	0.093985	0.0703872	0.0774895	not_sig	-0.13883	0.0806445	0.0354102	0.070812	0.102955	not_sig	NA	NA	NA	NA	NA	NA	NA	NA	NA	NA	NA	NA
16	56991363	T	C	HDL	-0.2293	0.0017	4.85e-3889	-0.2413	0.002	1.80e-3256	0.1118	not_sig	0.00564074	0.00312595	0.00288551	0.0028718	0.512081	not_sig	-0.00051706	0.00324529	0.00900559	0.00288895	0.0277097	not_sig	0.00042473	0.0010133	0.001311	0.0013041	0.712051	not_sig	-0.00151	0.0020405	0.0044567	0.0017816	0.0168866	not_sig
16	57551366	T	C	HDL	0.058	0.0051	1.054e-29	0.0469	0.0055	1.692e-17	0.3188	not_sig	0.0151328	0.00876926	-0.0151478	0.0080014	0.00998298	not_sig	0.00308794	0.00910421	-0.0112046	0.00804862	0.237463	not_sig	-0.000224	0.0028094	-0.0019289	0.0035948	0.760833	not_sig	0.0018156	0.0056575	0.0013025	0.004911	0.950657	not_sig
16	63630178	A	G	HDL	0.1366	0.0804	0.08912	0.1395	0.0692	0.04389	0.7812	not_sig	0.0389026	0.105253	-0.0822701	0.0956009	0.389374	not_sig	0.0848459	0.1093	0.0111547	0.0961779	0.611184	not_sig	NA	NA	NA	NA	NA	NA	NA	NA	NA	NA	NA	NA
16	66071124	C	G	HDL	0.2222	0.0791	0.004969	0.3521	0.0708	6.651e-07	0.5867	not_sig	0.146213	0.119554	-0.169913	0.102124	0.0422975	not_sig	-0.00724415	0.124151	0.00991131	0.10274	0.914851	not_sig	NA	NA	NA	NA	NA	NA	NA	NA	NA	NA	NA	NA
16	67985706	T	C	HDL	-0.0678	0.0023	2.09e-193	-0.0768	0.0027	4.03e-184	0.08237	not_sig	-6.89711e-05	0.00447667	-0.00128279	0.00412036	0.840301	not_sig	0.00540411	0.0046483	-0.00755585	0.00414484	0.0366044	not_sig	-3.902e-05	0.001452	0.003404	0.0018716	0.2071	not_sig	0.0016743	0.0029239	-0.0034109	0.0025569	0.157216	not_sig
16	68866671	C	G	HDL	-0.3986	0.0445	3.093e-19	-0.5218	0.0505	4.978e-25	0.9907	not_sig	0.0190044	0.0724317	0.0579281	0.0619665	0.680038	not_sig	0.0534414	0.0752165	-0.0622563	0.0623404	0.234253	not_sig	NA	NA	NA	NA	NA	NA	NA	NA	NA	NA	NA	NA
16	72847307	A	G	HDL	-0.3967	0.1092	0.0002785	-0.4805	0.0925	2.063e-07	0.1764	not_sig	NA	NA	NA	NA	NA	NA	NA	NA	NA	NA	NA	NA	NA	NA	NA	NA	NA	NA	NA	NA	NA	NA	NA	NA
16	75205213	A	G	HDL	0.0109	0.0018	2.523e-09	0.0094	0.0021	6.051e-06	0.302	not_sig	0.00834645	0.00316153	0.00464106	0.0029024	0.38318	not_sig	-0.00967458	0.00328281	-0.0080857	0.00291965	0.716414	not_sig	-0.00017123	0.0010244	0.0014976	0.0013174	0.367537	not_sig	7.253e-05	0.0020629	-0.0032769	0.0017997	0.179366	not_sig
16	76458533	A	G	HDL	0.09	0.0523	0.08517	0.0038	0.0481	0.9376	0.02056	not_sig	0.198255	0.114159	0.161652	0.0918883	0.800861	not_sig	-0.00650874	0.117687	-0.0896244	0.0928861	0.577684	not_sig	NA	NA	NA	NA	NA	NA	NA	NA	NA	NA	NA	NA
2	165508389	T	C	LDL	0.0037	0.0017	0.03078	0.0197	0.002	4.812e-24	8.888e-06	sig	-0.00323403	0.00296345	-0.0137984	0.00271838	0.0079674	not_sig	-0.00571642	0.00308245	0.0647141	0.00273358	4.42042e-66	sig	-0.0015569	0.00096656	-0.00087438	0.0012439	0.461332	not_sig	0.00094401	0.0019582	-1.0829e-05	0.0017086	0.701265	not_sig
16	85150163	A	G	HDL	-0.0139	0.003	4.724e-06	-0.0199	0.0035	1.412e-08	0.3796	not_sig	NA	NA	NA	NA	NA	NA	NA	NA	NA	NA	NA	NA	NA	NA	NA	NA	NA	NA	NA	NA	NA	NA	NA	NA
16	85927519	C	G	HDL	0.0099	0.002	6.425e-07	0.0135	0.0022	6.22e-10	0.2899	not_sig	0.00365223	0.00340342	0.002974	0.00312282	0.882098	not_sig	-0.003016	0.00353359	0.00103483	0.00314151	0.389497	not_sig	0.00064971	0.0010977	-0.00092806	0.0014111	0.370657	not_sig	0.0007961	0.0022106	-0.0016771	0.0019278	0.362082	not_sig
16	88004092	A	G	HDL	-0.014	0.0018	2.134e-14	-0.0123	0.002	9.395e-10	0.8805	not_sig	0.00917107	0.00294674	0.00612471	0.00270056	0.441409	not_sig	0.00468767	0.0030594	0.00600137	0.00271667	0.747075	not_sig	-0.00089077	0.0009544	0.002138	0.0012252	0.0582695	not_sig	0.00025994	0.0019219	0.0011308	0.0016739	0.703176	not_sig
16	88535670	T	C	HDL	0.0107	0.0018	4.053e-09	0.0127	0.0021	1.168e-09	0.942	not_sig	-0.00437643	0.00320976	-0.00105006	0.0029385	0.440076	not_sig	0.00234229	0.00333249	-0.000291442	0.00295589	0.552607	not_sig	-0.00087864	0.0010316	0.0013628	0.0013229	0.178596	not_sig	0.0074662	0.0020773	0.00017518	0.0018073	0.00578546	not_sig
17	481604	T	C	HDL	0.0136	0.0022	4.902e-10	0.0162	0.0025	9.723e-11	0.4846	not_sig	0.000881413	0.00381684	0.00344139	0.00350168	0.617643	not_sig	0.0110617	0.00395146	-0.00761404	0.00351287	0.000388377	not_sig	-0.00087413	0.0012331	-0.0025849	0.0015868	0.564881	not_sig	-0.00032778	0.0024823	0.0044809	0.0021682	0.110181	not_sig
17	2064702	A	T	HDL	-0.0072	0.0018	6.796e-05	-0.0117	0.0022	8.529e-08	0.2109	not_sig	0.00441372	0.00317543	0.00335286	0.00290777	0.803465	not_sig	0.0069165	0.00328781	0.0092061	0.00291728	0.600837	not_sig	NA	NA	NA	NA	NA	NA	NA	NA	NA	NA	NA	NA
17	3902650	A	T	HDL	0.0078	0.0018	9.713e-06	0.011	0.002	3.49e-08	0.6772	not_sig	-0.00648022	0.00317173	-0.0120101	0.00290483	0.194058	not_sig	-0.00991474	0.00328363	-0.0129634	0.00291429	0.485514	not_sig	-0.0017014	0.0010225	-0.00022757	0.0013135	0.254643	not_sig	-0.0012232	0.0020583	0.0019066	0.0017948	0.21705	not_sig
17	7462969	A	G	HDL	0.0124	0.0019	4.578e-11	0.0216	0.0022	1.222e-22	0.03736	not_sig	-0.00591119	0.00358757	-0.00348432	0.00329662	0.614885	not_sig	-0.00797198	0.00371448	-0.00859493	0.00330744	0.899887	not_sig	-9.6529e-05	0.0011635	0.0030694	0.0014994	0.144411	not_sig	-0.00047542	0.0023422	0.0029255	0.0020489	0.233189	not_sig
17	8109598	A	G	HDL	0.0095	0.0016	7.746e-09	0.0104	0.0019	2.873e-08	0.3971	not_sig	-0.0027791	0.00302162	-0.00723116	0.00276663	0.272372	not_sig	0.00198289	0.00312843	0.00646761	0.00277563	0.281456	not_sig	0.00053998	0.00097394	0.00014807	0.0012506	0.735117	not_sig	-0.0024204	0.0019605	-0.0053055	0.0017088	0.20403	not_sig
17	17483297	A	G	HDL	0.0202	0.0034	4.931e-09	0.0324	0.004	2.665e-16	0.1436	not_sig	0.0184043	0.00623933	-0.00650252	0.00569104	0.0028924	not_sig	-0.00913053	0.00645874	-0.037916	0.0057098	0.000797031	not_sig	-0.0011609	0.0020099	0.0013271	0.0025714	0.430719	not_sig	0.0062405	0.0040459	-0.0073434	0.0035137	0.00650904	not_sig
17	26721895	A	G	HDL	0.0092	0.0016	1.243e-08	0.0099	0.0018	6.549e-08	0.4417	not_sig	-0.00501616	0.00296398	-0.00545314	0.00271893	0.912619	not_sig	0.00128078	0.00306883	0.00632015	0.00272778	0.217664	not_sig	0.00045689	0.00095506	0.001972	0.0012284	0.463494	not_sig	-0.00077817	0.0019225	0.0012107	0.0016785	0.401283	not_sig
17	37810218	C	G	HDL	0.0315	0.0017	6.518e-78	0.0271	0.0019	2.633e-45	0.007715	not_sig	0.000359342	0.00310816	-0.001008	0.00285104	0.743328	not_sig	0.00694134	0.00321752	-0.0050962	0.00286027	0.00497765	not_sig	0.0013303	0.0010044	0.0013476	0.001292	0.772579	not_sig	-0.0080304	0.0020219	-0.0050562	0.0017654	0.292668	not_sig
17	38505824	C	G	HDL	-0.0116	0.0021	3.451e-08	-0.0145	0.0023	4.856e-10	0.7662	not_sig	-0.00325508	0.00333219	0.00476104	0.00306203	0.0735893	not_sig	-0.00946358	0.00344981	-0.00301429	0.00307184	0.160813	not_sig	-0.002045	0.0010792	-0.0005298	0.0013903	0.242066	not_sig	0.0027446	0.0021725	0.0037448	0.0018997	0.664863	not_sig
17	40359483	A	G	HDL	0.1193	0.0173	5.775e-12	0.1019	0.02	3.62e-07	0.6383	not_sig	0.0168171	0.0512159	0.0112669	0.048029	0.936361	not_sig	-0.00637501	0.0530336	-0.0229517	0.0481884	0.81626	not_sig	NA	NA	NA	NA	NA	NA	NA	NA	NA	NA	NA	NA
17	41926126	T	C	HDL	0.1982	0.0051	7.15e-329	0.1725	0.0059	1.65e-187	1.778e-05	sig	0.0073565	0.00842642	0.0185777	0.00767241	0.319957	not_sig	-0.00671985	0.00872567	-0.0116038	0.00770013	0.67337	not_sig	-0.0034351	0.0027242	-0.0011531	0.0034809	0.465418	not_sig	0.0052808	0.0054838	-0.004844	0.0047565	0.135605	not_sig
17	45024027	A	G	HDL	-0.0103	0.0017	1.022e-09	-0.0078	0.0019	3.922e-05	0.1517	not_sig	0.00294042	0.00307943	-0.00228547	0.00282967	0.206895	not_sig	-0.00727638	0.00318798	-0.00155051	0.00283898	0.177904	not_sig	0.00091169	0.00099486	0.00029672	0.0012822	0.593744	not_sig	-0.0010795	0.0020027	0.0016697	0.0017521	0.265867	not_sig
17	45737275	A	T	HDL	-0.0126	0.0016	7.079e-15	-0.0172	0.0019	1.14e-20	0.1051	not_sig	0.00131042	0.00294418	0.00595457	0.00269687	0.240049	not_sig	0.000755111	0.00304805	-0.00709296	0.00270584	0.0531101	not_sig	-0.0016746	0.00095038	-0.0037687	0.0012207	0.440321	not_sig	0.0020201	0.0019131	0.0035319	0.0016681	0.485001	not_sig
17	46272609	A	G	HDL	0.0269	0.0034	5.907e-15	0.0284	0.0038	1.27e-13	0.8866	not_sig	-0.0189459	0.00579643	-0.0216709	0.00531625	0.726379	not_sig	-0.00833443	0.00600156	-0.000567523	0.00533305	0.331219	not_sig	-0.0035308	0.0018683	0.0075185	0.0024035	0.000371474	not_sig	-0.008892	0.003761	-0.012328	0.0032843	0.392969	not_sig
17	47060322	A	C	HDL	-0.0124	0.0019	3.761e-11	-0.0098	0.0021	3.727e-06	0.197	not_sig	0.020309	0.00316787	0.0192899	0.00290312	0.810676	not_sig	-0.00132534	0.00327948	-0.00601246	0.00291232	0.2831	not_sig	-0.00023066	0.0010165	-0.0018549	0.001307	0.426085	not_sig	0.0038754	0.0020462	0.0042237	0.0017859	0.826175	not_sig
17	53400110	T	C	HDL	0.0103	0.0017	1.929e-09	0.0106	0.0019	3.299e-08	0.2267	not_sig	0.0020773	0.00311744	-0.00407707	0.00285323	0.141308	not_sig	0.000764884	0.00322763	-0.000317897	0.00286271	0.800975	not_sig	0.00025683	0.001001	-0.00075292	0.0012849	0.553233	not_sig	0.0015148	0.0020151	-0.0017381	0.0017558	0.191591	not_sig
17	57932314	A	T	HDL	0.0142	0.0019	1.613e-14	0.0064	0.0021	0.002738	0.002719	not_sig	-0.00659231	0.00356847	-0.00112702	0.00329065	0.255441	not_sig	0.00952034	0.00369427	-0.00776297	0.0033013	0.000458542	not_sig	0.0031815	0.0011528	0.00060914	0.0014909	0.0719475	not_sig	0.0082682	0.0023205	0.0013645	0.0020372	0.0209837	not_sig
17	61887693	T	C	HDL	-0.009	0.0017	6.144e-08	-0.0073	0.0019	0.0001202	0.5792	not_sig	0.00564368	0.00300829	0.00865486	0.00275768	0.456109	not_sig	-0.00635785	0.0031146	-0.00279355	0.00276657	0.390138	not_sig	0.00075661	0.0009722	0.0029007	0.0012497	0.320252	not_sig	-0.0041169	0.001957	0.0015378	0.0017076	0.0211957	not_sig
17	65938655	A	G	HDL	-0.0144	0.0019	1.896e-14	-0.0137	0.0022	2.108e-10	0.9221	not_sig	0.0155775	0.0036977	0.0184215	0.00339066	0.56693	not_sig	0.00432051	0.0038282	0.0110834	0.00340163	0.184705	not_sig	-0.0030213	0.0011948	-0.0033375	0.0015367	0.667945	not_sig	0.006713	0.0024051	0.0030163	0.0020999	0.247676	not_sig
17	66879927	T	C	HDL	0.0486	0.0038	3.166e-37	0.0501	0.0043	2.979e-31	0.187	not_sig	-0.0131817	0.00611916	0.0048557	0.00564193	0.0286027	not_sig	-0.00972246	0.00633536	-0.0209587	0.00566077	0.184052	not_sig	0.00043581	0.0020322	0.0021585	0.0026328	0.689374	not_sig	0.0014968	0.0040908	-0.00067346	0.0035977	0.672699	not_sig
17	68507436	T	C	HDL	0.0096	0.0017	2.28e-08	0.0126	0.0019	7.648e-11	0.1392	not_sig	0.000530803	0.00316277	0.00537176	0.00290091	0.254566	not_sig	-0.00153762	0.00327403	-0.035722	0.00291026	4.57106e-15	sig	0.00068997	0.0010217	0.00078649	0.0013136	0.918784	not_sig	-0.00071878	0.0020567	0.0011115	0.001795	0.470249	not_sig
17	70295760	A	G	HDL	0.0081	0.0016	7.443e-07	0.0093	0.0019	4.685e-07	0.9183	not_sig	-0.00351193	0.00295851	-0.00652808	0.00271354	0.447931	not_sig	0.0144439	0.00306296	0.0131361	0.00272219	0.748548	not_sig	0.0018169	0.00095434	0.00077166	0.0012272	0.312905	not_sig	0.00055918	0.0019211	0.00061042	0.0016769	0.972739	not_sig
17	74214276	T	C	HDL	0.0128	0.0028	4.453e-06	0.0206	0.0033	6.76e-10	0.2709	not_sig	0.00333255	0.00544364	0.00232159	0.00504345	0.890555	not_sig	-0.0145374	0.00563575	-0.0434949	0.00506018	0.000122976	not_sig	0.0016123	0.0017522	0.0034356	0.0022757	0.731695	not_sig	-0.0048243	0.0035271	0.0028906	0.0031097	0.0808857	not_sig
17	76394042	A	G	HDL	-0.0312	0.0016	1.896e-84	-0.0285	0.0018	8.741e-55	0.1495	not_sig	0.00643765	0.00299867	0.00500105	0.00275209	0.721459	not_sig	0.00436468	0.00310454	0.00131808	0.00276094	0.461403	not_sig	-0.00088986	0.00096984	-0.0005641	0.0012477	0.70059	not_sig	0.0026975	0.0019523	0.0016862	0.0017049	0.710462	not_sig
18	287534	A	G	HDL	-0.0151	0.0028	5.764e-08	-0.0202	0.0033	1.422e-09	0.3106	not_sig	0.000828004	0.00566525	0.00458288	0.0052303	0.622802	not_sig	0.00972228	0.00587248	-0.00722535	0.00526124	0.0308533	not_sig	0.00051623	0.0018329	0.00092661	0.0023737	0.956063	not_sig	-0.0013238	0.0036891	-0.0062141	0.0032415	0.267539	not_sig
18	2987038	T	C	HDL	0.0118	0.0018	4.957e-11	0.0095	0.002	3.533e-06	0.4431	not_sig	0.00202583	0.00327664	0.00373696	0.00301069	0.697714	not_sig	-0.0057355	0.00339638	-0.00348754	0.00302796	0.619738	not_sig	-0.0011981	0.0010609	0.00057176	0.0013671	0.255355	not_sig	-0.00277	0.0021352	0.00025455	0.001867	0.263731	not_sig
18	20070591	T	C	HDL	0.0081	0.0019	1.879e-05	0.0116	0.0022	1.074e-07	0.44	not_sig	0.000677554	0.00333913	-0.000935849	0.00307254	0.719495	not_sig	-0.00239125	0.00346076	-0.00763243	0.00309036	0.256536	not_sig	-0.0001756	0.001079	-0.001064	0.0013928	0.689818	not_sig	0.0045901	0.0021717	-0.0013319	0.0019021	0.0303278	not_sig
18	21143739	T	G	HDL	0.014	0.0016	1.597e-17	0.0132	0.0019	2.507e-12	0.3045	not_sig	-0.0236928	0.0029347	-0.0165437	0.00268901	0.0696549	not_sig	-0.0039662	0.00304182	-0.0037505	0.00270461	0.957551	not_sig	0.00067878	0.0009489	0.0055995	0.0012196	0.00964695	not_sig	0.0017267	0.0019099	0.00099891	0.0016655	0.781058	not_sig
18	29772887	T	C	HDL	-0.2188	0.0315	3.533e-12	-0.1538	0.0366	2.609e-05	0.1825	not_sig	NA	NA	NA	NA	NA	NA	NA	NA	NA	NA	NA	NA	NA	NA	NA	NA	NA	NA	NA	NA	NA	NA	NA	NA
18	40705900	A	G	HDL	0.0107	0.0017	2.115e-10	0.012	0.0019	2.859e-10	0.944	not_sig	-0.0113376	0.00304666	-0.0153941	0.00279345	0.321566	not_sig	-0.00578466	0.0031577	-0.00730005	0.00280966	0.718766	not_sig	-0.00093155	0.00098283	0.000632	0.0012642	0.290745	not_sig	-0.0020461	0.0019782	-0.0016775	0.0017265	0.911426	not_sig
18	45692874	T	C	HDL	-0.452	0.0694	7.218e-11	-0.2956	0.0862	0.0006082	0.04739	not_sig	NA	NA	NA	NA	NA	NA	NA	NA	NA	NA	NA	NA	NA	NA	NA	NA	NA	NA	NA	NA	NA	NA	NA	NA
18	46545976	C	G	HDL	-0.1444	0.0093	3.436e-54	-0.1841	0.0106	1.224e-67	0.05655	not_sig	0.00519086	0.0156848	-0.00188346	0.0143271	0.736599	not_sig	-0.0312171	0.0162565	-0.031909	0.0144142	0.974483	not_sig	NA	NA	NA	NA	NA	NA	NA	NA	NA	NA	NA	NA
18	47181668	A	T	HDL	0.0729	0.0022	5.09e-246	0.081	0.0024	5.75e-240	0.4731	not_sig	0.0052314	0.00383305	0.00294852	0.00351154	0.657356	not_sig	0.00479616	0.0039725	-0.00946056	0.00353177	0.00706086	not_sig	0.0010154	0.0012419	-0.001773	0.0015951	0.169161	not_sig	0.0042654	0.0024997	-0.0015756	0.0021784	0.0622589	not_sig
18	48211367	T	C	HDL	-0.0593	0.0265	0.02556	-0.0306	0.0245	0.2123	0.9881	not_sig	-0.0615667	0.0318803	0.0155057	0.0284622	0.0685323	not_sig	0.00814358	0.0330513	-0.0159193	0.0286288	0.580451	not_sig	NA	NA	NA	NA	NA	NA	NA	NA	NA	NA	NA	NA
18	48712504	A	G	HDL	0.8295	0.1556	9.758e-08	0.7734	0.1347	9.242e-09	0.7369	not_sig	NA	NA	NA	NA	NA	NA	NA	NA	NA	NA	NA	NA	NA	NA	NA	NA	NA	NA	NA	NA	NA	NA	NA	NA
18	50285398	T	C	HDL	0.0143	0.0023	5.057e-10	0.0083	0.0027	0.00229	0.058	not_sig	-0.0137052	0.00424634	-0.00541146	0.00389281	0.145894	not_sig	-0.00743987	0.00440144	-0.0142338	0.0039154	0.24671	not_sig	-0.0021194	0.0013754	0.0015212	0.001769	0.0801581	not_sig	-0.0022981	0.0027684	-0.0015736	0.0024157	0.855481	not_sig
18	56118358	T	C	HDL	0.0546	0.0093	3.711e-09	0.0772	0.0102	5.008e-14	0.7115	not_sig	0.0260098	0.0136972	0.0230989	0.012735	0.875082	not_sig	0.0167077	0.0141945	-0.0354544	0.0128051	0.0061317	not_sig	-0.0091325	0.0043656	0.0081665	0.0056916	0.0106059	not_sig	0.0015164	0.0087871	-0.0045344	0.0077727	0.575914	not_sig
18	57829135	T	C	HDL	-0.0138	0.0019	8.714e-13	-0.0273	0.0022	1.364e-35	0.001895	not_sig	0.0545813	0.0034719	0.0551076	0.00317732	0.910068	not_sig	-0.0128526	0.00359832	0.00565682	0.00319535	0.000111887	not_sig	0.00028452	0.0011228	-0.0024423	0.0014416	0.178543	not_sig	0.003672	0.0022599	0.0010416	0.0019688	0.369924	not_sig
18	60845884	T	C	HDL	0.0142	0.0017	1.576e-16	0.0097	0.002	1.289e-06	0.1973	not_sig	0.0153859	0.00302211	0.0116195	0.00277315	0.353669	not_sig	-0.00140293	0.00313258	-0.0306554	0.00278917	2.46891e-12	sig	0.0020864	0.00098033	0.0014875	0.0012616	0.422165	not_sig	0.0022235	0.0019732	-0.0021535	0.0017229	0.0736351	not_sig
19	3414088	A	G	HDL	0.013	0.0018	4.111e-13	0.017	0.002	1.048e-16	0.2936	not_sig	-0.00309168	0.00323783	-0.00655946	0.00297142	0.425436	not_sig	-0.00716372	0.0033497	0.0016046	0.00298237	0.049568	not_sig	0.00053613	0.0010384	-0.0016983	0.0013362	0.208963	not_sig	0.0042515	0.0020883	-0.00087322	0.0018242	0.0516736	not_sig
19	4028783	T	C	HDL	0.0145	0.002	4.884e-13	0.0195	0.0023	1.292e-17	0.5766	not_sig	-0.0131115	0.00342904	-0.0027599	0.00315221	0.0247819	not_sig	-0.00369454	0.00354746	-0.014637	0.00316369	0.0207631	not_sig	0.0013331	0.0011018	0.00087533	0.0014199	0.622625	not_sig	-0.0026929	0.0022159	0.0010268	0.0019384	0.181045	not_sig
19	4965064	A	G	HDL	0.0093	0.0017	8.05e-08	0.0116	0.002	9.415e-09	0.0794	not_sig	1.00812e-05	0.00312533	-0.00339408	0.00286013	0.417018	not_sig	-0.00445189	0.00323292	-0.000648809	0.00287074	0.376963	not_sig	-0.00066267	0.0010169	-0.0010694	0.0013061	0.947908	not_sig	-0.0070576	0.0020452	-0.0033589	0.0017832	0.175706	not_sig
19	7238681	T	C	HDL	0.0171	0.0022	2.569e-15	0.0153	0.0025	8.471e-10	0.8057	not_sig	0.0063219	0.00374255	0.00294447	0.00342862	0.501515	not_sig	-0.00116998	0.003871	-0.0176976	0.00344121	0.00135019	not_sig	0.00050846	0.0012048	0.0005818	0.0015489	0.949965	not_sig	0.0027931	0.002423	0.0036618	0.0021146	0.730338	not_sig
19	7912816	T	C	HDL	0.0077	0.0018	1.092e-05	0.009	0.0021	1.607e-05	0.9363	not_sig	-0.0052831	0.00307443	-0.0047178	0.00282626	0.891247	not_sig	0.00479652	0.00318095	-0.00625419	0.00283645	0.00920491	not_sig	NA	NA	NA	NA	NA	NA	NA	NA	NA	NA	NA	NA
19	8429323	A	G	HDL	-0.2488	0.0063	2.05e-341	-0.1866	0.0072	4.35e-148	5.705e-13	sig	-0.00947941	0.010523	-0.00972896	0.00979155	0.986009	not_sig	0.0141555	0.0108888	0.0561374	0.00982885	0.00404477	not_sig	-0.00066771	0.0034021	0.00124	0.0044353	0.734382	not_sig	-0.0028769	0.006842	-0.0038745	0.0060552	0.890803	not_sig
19	8945880	A	G	HDL	0.0829	0.0143	6.881e-09	0.0894	0.0154	6.175e-09	0.3129	not_sig	0.00934845	0.0244236	0.00636146	0.0225765	0.927722	not_sig	0.00166027	0.0252715	-0.0561534	0.0226612	0.0871283	not_sig	-0.0044374	0.0073952	-0.0094077	0.0095349	0.825171	not_sig	-0.0029289	0.014873	-0.0096941	0.013017	0.700832	not_sig
19	11346155	A	G	HDL	0.0674	0.003	3.38e-110	0.0827	0.0035	3.43e-122	0.02809	not_sig	0.00585761	0.00803817	0.00173089	0.00738541	0.702574	not_sig	-0.0258297	0.00831314	-0.0393219	0.00741017	0.223645	not_sig	-0.0014792	0.0025867	0.00076888	0.0033371	0.556165	not_sig	-0.0020938	0.0052022	0.002622	0.0045559	0.463887	not_sig
19	18597196	A	G	HDL	-0.0187	0.0026	1.137e-12	-0.0091	0.0029	0.001557	0.009659	not_sig	0.00466167	0.0045676	0.00390553	0.00419049	0.90194	not_sig	0.0209926	0.00472449	0.0167601	0.0042064	0.501553	not_sig	-0.0014545	0.0014663	-0.00058008	0.0018866	0.589697	not_sig	-0.0027149	0.002949	-0.0050165	0.0025756	0.493941	not_sig
19	33896432	A	C	HDL	0.0188	0.0017	4.464e-29	0.0175	0.0019	4.592e-20	0.09631	not_sig	0.00157319	0.00311536	0.0092673	0.00285551	0.0659235	not_sig	0.0172413	0.00322273	0.0058562	0.00286616	0.00801475	not_sig	0.00038211	0.0010052	-0.00080856	0.0012923	0.475532	not_sig	0.0027741	0.0020215	0.0043891	0.0017642	0.472554	not_sig
19	35487933	C	G	HDL	0.0102	0.0018	2.356e-08	0.0129	0.0021	4.722e-10	0.2897	not_sig	-0.00338506	0.00320562	-0.00698347	0.00294012	0.403389	not_sig	0.0048533	0.00331634	0.00545612	0.0029507	0.891505	not_sig	0.00045458	0.0010291	-0.0014156	0.0013236	0.287957	not_sig	-0.00062045	0.0020696	0.0031744	0.001807	0.132328	not_sig
19	41826020	A	C	HDL	0.0163	0.0024	7.413e-12	0.0148	0.0027	5.848e-08	0.3422	not_sig	-0.00122037	0.00392529	-0.00241533	0.00359992	0.820723	not_sig	0.00324137	0.00406012	-0.00328873	0.00361346	0.227531	not_sig	8.922e-05	0.0012666	0.0016733	0.0016298	0.517718	not_sig	0.0015639	0.0025473	0.00070529	0.0022251	0.799974	not_sig
19	44153100	A	G	HDL	-0.0168	0.0024	4.998e-12	-0.0162	0.0028	5.594e-09	0.324	not_sig	0.00284281	0.00404385	-0.00248438	0.00370472	0.326537	not_sig	0.0155299	0.00418331	0.0103531	0.00371854	0.352895	not_sig	-0.00093508	0.0013083	0.0014869	0.0016804	0.253139	not_sig	0.0022803	0.0026313	-0.00017861	0.0022941	0.460623	not_sig
19	44890969	C	G	HDL	0.1525	0.0243	3.626e-10	0.131	0.0265	7.938e-07	0.5617	not_sig	0.00181646	0.0419658	-0.0593676	0.0389331	0.280331	not_sig	0.00774713	0.0434227	0.0256681	0.0390133	0.75781	not_sig	0.010372	0.013006	0.016163	0.016876	0.955145	not_sig	0.0050131	0.026156	-0.024753	0.023039	0.35232	not_sig
19	45411941	T	C	HDL	-0.0964	0.0022	5.55e-405	-0.0776	0.0026	9.65e-198	3.096e-14	sig	-0.0235035	0.00405379	-0.0267341	0.00372476	0.553363	not_sig	-0.0237205	0.00419372	-0.0278076	0.00373874	0.464979	not_sig	0.00047391	0.0013089	-0.0010073	0.0016869	0.496085	not_sig	-0.0030606	0.0026323	-0.0024323	0.0023029	0.881491	not_sig
19	46385438	A	C	HDL	-0.0349	0.0028	2.82e-36	-0.0281	0.0031	3.563e-19	0.0338	not_sig	0.005089	0.00454348	-0.00113764	0.00415023	0.306769	not_sig	0.0216847	0.0047006	0.011103	0.00416497	0.0905835	not_sig	-0.00089067	0.0014657	0.00012716	0.0018761	0.612906	not_sig	0.0024957	0.0029477	0.0032137	0.0025613	0.812441	not_sig
19	47585240	A	G	HDL	-0.0146	0.0017	6.067e-17	-0.0164	0.002	3.583e-16	0.7732	not_sig	0.0279119	0.00324945	0.0194453	0.00298754	0.0527009	not_sig	-0.00398424	0.00336119	-0.00137968	0.0029988	0.561397	not_sig	-0.0022547	0.0010494	-0.0016647	0.0013528	0.434896	not_sig	0.0050877	0.0021105	0.0042169	0.0018468	0.809525	not_sig
19	48105080	T	C	HDL	0.0182	0.0024	1.268e-14	0.0166	0.0027	4.625e-10	0.1961	not_sig	-0.00431749	0.00433758	0.00553451	0.00397431	0.0907438	not_sig	-0.0100231	0.00448688	0.00424783	0.00398838	0.0169549	not_sig	0.0029155	0.0013999	-0.0017861	0.001799	0.0244678	not_sig	0.0013279	0.0028153	0.0007155	0.0024561	0.872507	not_sig
19	50024391	A	G	HDL	0.0135	0.0021	9.214e-11	0.0076	0.0024	0.001362	0.1413	not_sig	-0.00484559	0.00378566	-0.00445851	0.00347759	0.939374	not_sig	0.00516873	0.0039163	-0.000899526	0.00348978	0.245259	not_sig	-0.00018928	0.0012221	-8.7551e-05	0.0015739	0.937083	not_sig	0.00016866	0.0024577	-0.0036746	0.0021487	0.196878	not_sig
19	52314655	C	G	HDL	0.0194	0.0018	2.954e-26	0.0223	0.0021	2.237e-27	0.8487	not_sig	-0.00124594	0.00332956	0.00603238	0.00304823	0.103412	not_sig	-0.00272822	0.00344458	-0.00411976	0.0030594	0.761602	not_sig	0.00029005	0.001075	-0.0013257	0.0013797	0.390803	not_sig	0.0044529	0.0021619	-0.0023965	0.0018836	0.0111246	not_sig
19	53601172	T	C	HDL	-0.0103	0.0019	3.47e-08	-0.0113	0.0021	7.367e-08	0.8403	not_sig	0.0075076	0.00330228	0.000490586	0.00302006	0.11324	not_sig	-0.00685046	0.00341594	0.00955039	0.00303097	0.00030953	not_sig	-0.0018458	0.001061	0.00021552	0.0013611	0.154748	not_sig	-0.0029619	0.0021338	0.0010279	0.0018583	0.135848	not_sig
19	54800500	A	G	HDL	0.0534	0.002	2.53e-160	0.0548	0.0022	2.88e-132	0.76	not_sig	0.00269875	0.0035297	0.00548944	0.00322994	0.555767	not_sig	0.00605376	0.00365143	0.0015364	0.00324165	0.352759	not_sig	-0.00084265	0.0011355	-0.00055411	0.0014576	0.762657	not_sig	0.0026442	0.0022836	1.5437e-05	0.0019899	0.365282	not_sig
19	56154339	T	C	HDL	0.0149	0.0023	1.204e-10	0.0125	0.0026	2.401e-06	0.4227	not_sig	-0.00677142	0.00417372	-0.0166452	0.00381859	0.0779085	not_sig	1.64793e-05	0.00431834	-0.00572963	0.00383263	0.317509	not_sig	0.0010475	0.0013472	0.00074496	0.0017284	0.768466	not_sig	-0.0023095	0.0027094	0.00088417	0.0023596	0.34663	not_sig
19	57488423	T	C	HDL	0.0065	0.0016	8.137e-05	0.012	0.0019	1.802e-10	0.0221	not_sig	0.00155526	0.00297174	0.000488075	0.00273516	0.789557	not_sig	0.0022321	0.00307416	-0.0114095	0.00274529	0.000885934	not_sig	0.0002922	0.00096114	0.0020247	0.0012405	0.375864	not_sig	0.0048756	0.001933	-0.00024166	0.0016936	0.0372748	not_sig
2	239597	C	G	HDL	0.0141	0.0017	2.954e-16	0.0182	0.0019	7.189e-21	0.2726	not_sig	-0.00973439	0.00304886	-0.0120646	0.00280257	0.569804	not_sig	0.014873	0.00317149	0.00127101	0.0028183	0.00128161	not_sig	0.0013994	0.00099471	-0.001897	0.0012826	0.0383819	not_sig	-0.0034557	0.0020152	-0.0043101	0.0017617	0.673103	not_sig
2	3642361	T	C	HDL	-0.0212	0.0021	6.327e-25	-0.0243	0.0024	1.621e-24	0.5554	not_sig	-0.00373138	0.00385451	0.00545475	0.00353031	0.0758746	not_sig	-0.00653867	0.00400993	0.0127279	0.00355001	0.000302261	not_sig	0.00040533	0.0012483	0.0022279	0.0016057	0.483488	not_sig	-0.00027736	0.0025289	-0.0027558	0.0022054	0.414471	not_sig
2	20372409	A	G	HDL	0.0169	0.0016	2.245e-26	0.0118	0.0018	9.032e-11	0.0283	not_sig	0.000304227	0.00292432	0.000181677	0.00268189	0.975113	not_sig	0.00289451	0.00304209	0.00893602	0.00269681	0.135528	not_sig	0.00019215	0.0009528	0.00062389	0.0012256	0.845586	not_sig	-0.0047026	0.0019303	-0.0003069	0.0016834	0.0743822	not_sig
2	21231524	A	G	HDL	-0.0541	0.0019	1.17e-169	-0.0633	0.0022	1.48e-177	0.1016	not_sig	-0.00441274	0.00360245	-0.010213	0.00330196	0.230582	not_sig	-0.00927017	0.00374732	0.00372645	0.00332056	0.00912802	not_sig	-0.00079069	0.0011775	0.0023123	0.0015135	0.121552	not_sig	-0.0031028	0.0023855	-0.0026005	0.0020788	0.904238	not_sig
2	21979516	A	G	HDL	-0.021	0.0057	0.0002038	-0.0072	0.0068	0.2899	0.2079	not_sig	-0.009026	0.0085653	-0.00262164	0.00786389	0.577993	not_sig	0.00996341	0.0089102	-0.0147375	0.00790892	0.0373039	not_sig	-0.0015828	0.0028031	0.0038635	0.003605	0.247303	not_sig	0.010483	0.0056787	-0.0090545	0.0049516	0.00556813	not_sig
2	26571411	A	G	HDL	0.0086	0.0017	3.161e-07	0.0099	0.0019	2.71e-07	0.5324	not_sig	-0.00124284	0.00291922	-0.00413636	0.00268181	0.460956	not_sig	0.0026191	0.0030366	0.00380944	0.00269679	0.768459	not_sig	-0.001287	0.00095242	1.8542e-05	0.0012271	0.303057	not_sig	0.00011107	0.0019295	0.00069498	0.0016855	0.80044	not_sig
2	27730940	T	C	HDL	0.0014	0.0017	0.4216	0.0085	0.0019	9.148e-06	0.05748	not_sig	0.0202071	0.00297399	0.00251718	0.00272775	9.52682e-06	sig	-0.00847591	0.00309343	-0.00361155	0.00274269	0.237283	not_sig	0.0026624	0.00097391	0.0022376	0.0012526	0.397238	not_sig	-0.0010126	0.0019731	-0.0019295	0.0017205	0.684642	not_sig
2	30480750	T	G	HDL	-0.0113	0.002	1.01e-08	-0.0115	0.0023	3.363e-07	0.7089	not_sig	0.000961048	0.00362117	0.00794093	0.00332041	0.151297	not_sig	0.00200227	0.00376658	0.00487429	0.0033392	0.566587	not_sig	-0.0019596	0.0011763	-0.0019514	0.0015136	0.704965	not_sig	-0.0039763	0.002383	0.00077872	0.002079	0.113525	not_sig
2	42590122	C	G	HDL	0.008	0.0017	3.323e-06	0.0119	0.002	1.084e-09	0.06815	not_sig	-0.00290644	0.00312782	-0.00184187	0.00286388	0.799844	not_sig	-0.00419187	0.00325316	-0.00647227	0.00287984	0.598066	not_sig	-0.00071094	0.0010181	0.0017072	0.0013075	0.156489	not_sig	-0.00086528	0.0020627	0.0019604	0.0017959	0.263707	not_sig
2	165508389	T	C	nonHDL	0.012	0.0023	1.408e-07	0.0257	0.0021	7.061e-35	1.12e-05	sig	-0.00323403	0.00296345	-0.0137984	0.00271838	0.0079674	not_sig	-0.00571642	0.00308245	0.0647141	0.00273358	4.42042e-66	sig	-0.0015569	0.00096656	-0.00087438	0.0012439	0.461332	not_sig	0.00094401	0.0019582	-1.0829e-05	0.0017086	0.701265	not_sig
2	54033988	C	G	HDL	0.0089	0.0016	3.875e-08	0.0126	0.0018	6.513e-12	0.1681	not_sig	-0.00452149	0.00295911	-0.00861622	0.0027057	0.302313	not_sig	0.00456012	0.00307831	-0.00132484	0.00272081	0.150223	not_sig	-0.0005237	0.00096393	0.0015764	0.0012367	0.201096	not_sig	-0.0053288	0.0019528	-0.0022782	0.0016986	0.237439	not_sig
2	58772377	A	T	HDL	-0.0086	0.0016	1.247e-07	-0.0119	0.0018	8.065e-11	0.1663	not_sig	0.0147863	0.00294823	0.0157609	0.002699	0.805467	not_sig	0.00332184	0.00306663	-0.00219548	0.00271388	0.175972	not_sig	-0.00045467	0.00096016	-0.00046225	0.0012326	0.918361	not_sig	1.1097e-05	0.0019452	9.5643e-05	0.0016929	0.971076	not_sig
2	59293596	A	C	HDL	-0.0083	0.0018	2.597e-06	-0.0103	0.002	2.104e-07	0.3539	not_sig	0.0155962	0.00305704	0.0113533	0.00280647	0.301751	not_sig	0.00201702	0.00317968	0.00298442	0.00282233	0.819224	not_sig	-0.0017529	0.00099494	-0.0013491	0.0012819	0.54105	not_sig	0.0054717	0.0020156	0.0044183	0.0017608	0.749258	not_sig
2	65284231	A	T	HDL	0.0171	0.0016	1.098e-25	0.013	0.0019	3.524e-12	0.1219	not_sig	-0.00291543	0.00300249	-0.00332976	0.00276248	0.918302	not_sig	0.0073279	0.0031232	-0.0134681	0.00277753	5.80606e-07	sig	0.0010969	0.00097862	0.00022811	0.0012632	0.470493	not_sig	0.00052155	0.0019826	0.00070251	0.0017351	0.931168	not_sig
2	66677881	T	G	HDL	-0.0084	0.0017	6.659e-07	-0.0134	0.0019	3.839e-12	0.1459	not_sig	0.000921398	0.00309818	0.0021566	0.00284794	0.766872	not_sig	0.00916523	0.00322284	0.0101941	0.00286366	0.810564	not_sig	-0.0021125	0.0010061	-0.0016367	0.0012972	0.469981	not_sig	-0.0015004	0.0020382	-0.00065561	0.0017817	0.75485	not_sig
2	70233392	T	C	HDL	-0.0091	0.0017	3.913e-08	-0.0079	0.0019	3.373e-05	0.6577	not_sig	-0.00361314	0.00301422	-0.0039037	0.0027712	0.942859	not_sig	0.00475871	0.0031352	-0.000371125	0.00278658	0.21931	not_sig	0.0013192	0.00098242	0.00013494	0.0012676	0.347306	not_sig	0.0017873	0.0019903	0.0011236	0.001741	0.811533	not_sig
2	85542718	A	G	HDL	-0.0084	0.0017	4.769e-07	-0.0134	0.0019	1.922e-12	0.3421	not_sig	-0.00394474	0.00291361	-0.00543569	0.00266828	0.703076	not_sig	0.0034054	0.00303096	0.00613661	0.00268293	0.497954	not_sig	0.0010727	0.00095061	0.0012376	0.0012214	0.871184	not_sig	0.0043064	0.0019258	-0.0011798	0.0016776	0.023391	not_sig
2	100729293	T	C	HDL	0.012	0.0022	3.167e-08	0.0153	0.0024	4.104e-10	0.2474	not_sig	-0.00609527	0.0038521	-0.020256	0.00351479	0.00609069	not_sig	-0.0169604	0.00400715	-0.0050404	0.00353439	0.0250433	not_sig	0.0013005	0.0012521	0.00026002	0.0016032	0.499301	not_sig	-0.0020716	0.0025367	0.0023382	0.002202	0.159015	not_sig
2	111714577	T	C	HDL	0.0088	0.0018	6.969e-07	0.0109	0.002	7.113e-08	0.456	not_sig	-0.00700942	0.00320719	-0.00714164	0.00293897	0.975509	not_sig	-0.00499874	0.00333606	0.00230101	0.00295527	0.0999445	not_sig	0.00044016	0.0010424	0.00051596	0.0013398	0.95492	not_sig	0.0017812	0.0021117	0.004275	0.0018402	0.310942	not_sig
2	121347612	C	G	HDL	-0.0216	0.0022	8.069e-23	-0.0119	0.0025	1.513e-06	0.03502	not_sig	NA	NA	NA	NA	NA	NA	NA	NA	NA	NA	NA	NA	-0.00043373	0.0011048	-0.0010788	0.0014211	0.825034	not_sig	-0.0033668	0.0022383	0.0027342	0.0019519	0.028204	not_sig
2	136602491	T	G	HDL	0.015	0.0018	3.418e-16	0.0134	0.0022	1.447e-09	0.2964	not_sig	NA	NA	NA	NA	NA	NA	NA	NA	NA	NA	NA	NA	2.5715e-05	0.0012004	-0.00025376	0.0015422	0.897926	not_sig	-0.00026731	0.002432	-0.0036957	0.0021182	0.240999	not_sig
2	146353184	A	T	HDL	-0.0096	0.0016	4.139e-09	-0.0065	0.0019	0.0004636	0.4232	not_sig	0.00654084	0.00298705	-0.00281594	0.00273808	0.0196835	not_sig	-0.000462396	0.0031072	0.00612074	0.00275317	0.11122	not_sig	0.0004405	0.00097055	-0.0014545	0.0012481	0.255503	not_sig	-0.008708	0.0019661	-0.0048776	0.0017143	0.152972	not_sig
2	158514969	T	C	HDL	-0.0143	0.0023	8.062e-10	-0.0125	0.0027	4.739e-06	0.1776	not_sig	-0.00928116	0.0041646	-0.00179817	0.00382541	0.181359	not_sig	0.016091	0.00433182	0.0231661	0.00384664	0.219949	not_sig	0.0013773	0.0013655	0.00088331	0.0017583	0.675528	not_sig	-0.00089513	0.0027664	-0.0073164	0.002415	0.0530504	not_sig
2	162966841	A	C	HDL	-0.0078	0.0017	6.534e-06	-0.0082	0.002	2.786e-05	0.3176	not_sig	0.00472892	0.00299968	0.0036445	0.00275341	0.787927	not_sig	-0.00378154	0.00312023	0.00163785	0.00276866	0.191933	not_sig	0.0021991	0.0009683	0.0045812	0.0012471	0.428282	not_sig	0.0022829	0.0019617	0.0028421	0.0017129	0.776213	not_sig
2	165518799	C	G	HDL	0.0333	0.0026	1.498e-38	0.0557	0.0029	1.034e-81	4.28e-05	sig	0.00837172	0.00446958	0.0189978	0.00412969	0.0777762	not_sig	0.0184389	0.00464785	-0.0845659	0.00415231	6.96853e-62	sig	0.0012894	0.0014583	-0.00098354	0.0018898	0.306945	not_sig	-0.0051249	0.0029544	0.0011801	0.0025957	0.0911743	not_sig
2	174075761	A	G	HDL	0.0082	0.0016	4.397e-07	0.011	0.0019	3.583e-09	0.1862	not_sig	-0.0029806	0.00294883	0.000372515	0.00270273	0.397165	not_sig	-0.00388489	0.00306752	-0.0115987	0.00271788	0.0586945	not_sig	0.00044495	0.00096172	0.00058656	0.0012365	0.979169	not_sig	-0.005929	0.0019483	0.0008934	0.0016983	0.00554554	not_sig
2	188292458	T	C	HDL	-0.0096	0.0018	4.292e-08	-0.0115	0.002	1.506e-08	0.811	not_sig	0.0105225	0.00319818	0.00289889	0.00293582	0.0761135	not_sig	0.0126159	0.00332667	0.0222373	0.00295236	0.0298018	not_sig	-0.0018571	0.0010412	-0.0010958	0.0013412	0.430407	not_sig	-0.0019685	0.0021094	-0.0012495	0.0018422	0.807793	not_sig
2	203497786	A	C	HDL	-0.0175	0.0018	2.188e-21	-0.0182	0.0021	2.41e-18	0.6726	not_sig	5.94173e-05	0.00316244	0.00298658	0.00289223	0.490261	not_sig	0.00226655	0.00328963	-0.0066785	0.00290839	0.0407422	not_sig	0.00056468	0.0010292	0.0014729	0.0013209	0.73045	not_sig	0.00064919	0.0020851	-0.001821	0.0018143	0.33256	not_sig
2	208372913	T	G	HDL	0.0096	0.0021	5.378e-06	0.0163	0.0024	2.07e-11	0.3458	not_sig	-0.00966791	0.00367174	-0.0134416	0.00335892	0.443708	not_sig	-0.00493146	0.0038193	-0.0127638	0.0033776	0.122839	not_sig	-0.00099971	0.0011979	-0.0034279	0.0015373	0.374888	not_sig	0.0039735	0.0024268	0.00083946	0.0021116	0.316218	not_sig
2	211540507	A	C	HDL	0.0115	0.0018	4.603e-11	0.0235	0.0021	3.07e-30	0.002356	not_sig	-0.0103813	0.00313269	-0.0174127	0.00286609	0.0943938	not_sig	0.00378974	0.00325891	0.0177721	0.00288221	0.00124625	not_sig	-0.00046219	0.0010268	0.00098345	0.0013194	0.396503	not_sig	-0.00019242	0.0020802	0.0025827	0.0018122	0.270768	not_sig
2	212274447	A	G	HDL	0.0099	0.0018	3.868e-08	0.006	0.002	0.00327	0.09377	not_sig	-0.0120032	0.0033771	-0.00742526	0.00310029	0.313151	not_sig	-0.00482567	0.00351302	-0.00309134	0.00311769	0.71073	not_sig	0.00060566	0.0010977	-0.0023481	0.0014138	0.121283	not_sig	0.00084428	0.0022237	0.0019266	0.0019419	0.675554	not_sig
2	215377588	A	T	HDL	0.0074	0.0016	4.82e-06	0.01	0.0018	5.299e-08	0.4921	not_sig	-0.00572345	0.00292225	-0.00612772	0.00267698	0.917935	not_sig	-0.00331572	0.00303955	-0.00410023	0.00269175	0.846116	not_sig	0.0008467	0.00095117	0.0015013	0.0012222	0.869385	not_sig	0.0029417	0.001927	-0.00082197	0.0016788	0.120078	not_sig
2	219699999	A	G	HDL	0.0848	0.0047	8.159e-74	0.0753	0.005	2.182e-50	0.2145	not_sig	NA	NA	NA	NA	NA	NA	NA	NA	NA	NA	NA	NA	NA	NA	NA	NA	NA	NA	NA	NA	NA	NA	NA	NA
2	227094758	A	G	logTG	0.0407	0.0017	2.13e-126	0.0262	0.002	3.806e-41	7.589e-07	sig	-0.00551163	0.00304436	0.000298936	0.00278846	0.155139	not_sig	-0.00355617	0.00316664	0.0149308	0.00280391	1.13279e-05	sig	-8.8767e-05	0.00099362	-0.0024042	0.0012763	0.22411	not_sig	0.0017818	0.002013	-0.0036711	0.001753	0.0272742	not_sig
2	228565656	A	G	HDL	-0.0137	0.0018	1.013e-14	-0.0144	0.002	5.161e-13	0.4215	not_sig	NA	NA	NA	NA	NA	NA	NA	NA	NA	NA	NA	NA	0.00071448	0.00098702	-0.001606	0.0012694	0.158826	not_sig	0.0017748	0.0019996	0.0013666	0.0017435	0.894875	not_sig
2	230019348	A	G	HDL	0.0089	0.0017	2.247e-07	0.0104	0.002	1.026e-07	0.7338	not_sig	-0.00135912	0.00304191	-0.00636779	0.00279738	0.220888	not_sig	-0.00229691	0.00316419	-0.000306087	0.00281284	0.636707	not_sig	0.00063808	0.00098793	0.002519	0.0012744	0.388387	not_sig	0.0036095	0.0020014	0.0012697	0.0017505	0.372475	not_sig
2	242395674	A	G	HDL	-0.0126	0.0016	5.226e-15	-0.0169	0.0019	6.809e-20	0.2561	not_sig	0.000205431	0.00295875	0.00982889	0.00271062	0.0154199	not_sig	0.00359026	0.003078	0.00194984	0.00272581	0.688606	not_sig	7.5117e-05	0.00096478	-0.0014615	0.0012399	0.388701	not_sig	-0.00023797	0.0019545	0.0012405	0.001703	0.534253	not_sig
20	569164	T	C	HDL	0.0692	0.0073	1.859e-21	0.0665	0.0079	2.63e-17	0.5998	not_sig	0.00623336	0.0121912	0.0174244	0.0111524	0.493901	not_sig	-0.00685046	0.0126136	-0.0935278	0.0111865	2.41907e-07	sig	0.0012942	0.0038712	0.0053998	0.0049555	0.625642	not_sig	0.010589	0.0077841	-0.0041568	0.0067669	0.12999	not_sig
20	17596155	A	C	HDL	0.0137	0.0022	6.404e-10	0.0224	0.0025	3.844e-19	0.01498	not_sig	-0.00511347	0.0040415	-0.0010899	0.00372297	0.459545	not_sig	0.0108038	0.00418279	0.00714163	0.00373674	0.511944	not_sig	0.0010012	0.0013078	-0.00059177	0.0016867	0.413986	not_sig	1.826e-05	0.0026297	0.0010036	0.0023032	0.756608	not_sig
20	21951847	A	G	HDL	0.0068	0.0016	1.859e-05	0.0109	0.0018	2.628e-09	0.08407	not_sig	-0.000371821	0.00297154	-0.00402044	0.00272867	0.360986	not_sig	-0.00313287	0.00307544	5.33639e-05	0.0027389	0.437098	not_sig	-0.00097512	0.00095806	0.00040207	0.0012311	0.321493	not_sig	0.00036732	0.0019264	0.00019371	0.0016811	0.946842	not_sig
20	30207659	T	G	HDL	0.0152	0.0022	7.573e-12	0.0146	0.0026	1.744e-08	0.3096	not_sig	-0.00966106	0.00402981	-0.00689127	0.00369739	0.608971	not_sig	0.00650795	0.00417068	-0.00426566	0.00371118	0.0525852	not_sig	0.0011325	0.0012986	-0.003076	0.0016675	0.0554476	not_sig	0.0066	0.0026112	0.005664	0.002277	0.847961	not_sig
20	32952125	A	G	HDL	0.0175	0.0017	6.646e-25	0.016	0.0019	8.151e-17	0.4959	not_sig	-0.00957052	0.00297347	-0.00928322	0.00272598	0.942652	not_sig	0.0114777	0.00307745	-0.00242902	0.0027363	0.000693967	not_sig	-0.00017747	0.00096077	0.00077001	0.0012328	0.572175	not_sig	0.0057182	0.0019318	0.0058655	0.0016833	0.852226	not_sig
20	42294613	T	C	HDL	-0.0141	0.0021	1.752e-11	-0.0086	0.0024	0.0003996	0.3969	not_sig	0.000693993	0.00402634	-0.00440914	0.00369555	0.345611	not_sig	0.00147383	0.00416712	0.00491491	0.00370913	0.53556	not_sig	-1.1071e-05	0.0013064	0.00064894	0.0016776	0.787265	not_sig	0.0042576	0.0026269	-0.0024922	0.0022908	0.0393784	not_sig
20	43042364	T	C	HDL	0.134	0.0047	5.17e-176	0.1387	0.0053	1.29e-148	0.8992	not_sig	0.00283521	0.00838457	-0.0066399	0.00778779	0.402968	not_sig	-0.0115827	0.00867879	-0.0240759	0.0078155	0.282632	not_sig	9.4189e-05	0.002716	0.00049894	0.0035304	0.943526	not_sig	0.0033875	0.0054613	-0.0029772	0.0048209	0.350296	not_sig
20	44551855	T	C	HDL	-0.0407	0.002	7.09e-94	-0.071	0.0023	9.03e-213	1.006e-13	sig	-0.00915824	0.00367139	-0.00810467	0.00337492	0.831022	not_sig	0.00285143	0.00379977	0.00393806	0.00338801	0.830243	not_sig	-0.00081858	0.0011873	-0.00084885	0.0015276	0.887344	not_sig	-0.0019508	0.0023873	0.0036076	0.0020859	0.0584553	not_sig
20	45602638	A	G	HDL	-0.0125	0.0019	7.435e-11	-0.0122	0.0022	2.631e-08	0.5848	not_sig	0.00456604	0.00327288	-0.00571715	0.00299822	0.0192808	not_sig	-0.00156572	0.00338692	0.0248042	0.00300945	5.03979e-09	sig	0.00073449	0.0010574	0.00014239	0.0013559	0.650004	not_sig	0.00054251	0.0021262	0.0036186	0.0018515	0.226532	not_sig
20	46340596	T	C	HDL	0.0217	0.0021	4.598e-26	0.0294	0.0023	1.534e-36	0.3418	not_sig	-0.000976986	0.00361576	-0.00120696	0.00332036	0.96226	not_sig	-0.00381249	0.00374131	-0.00191596	0.00333327	0.703827	not_sig	0.00035502	0.0011701	-0.00046167	0.001504	0.661133	not_sig	-0.00059108	0.0023527	-0.00046585	0.0020538	0.973186	not_sig
20	51033910	T	G	HDL	0.0097	0.0017	4.825e-09	0.0091	0.0019	1.35e-06	0.5357	not_sig	-0.00561907	0.00304566	-0.0126063	0.00279199	0.0876159	not_sig	-0.014642	0.00315205	-0.0175602	0.00280256	0.487098	not_sig	-0.00086895	0.00098478	0.00071406	0.0012633	0.29288	not_sig	-0.0025378	0.0019801	-6.9807e-05	0.001725	0.327478	not_sig
20	51588847	T	C	HDL	-0.0152	0.0026	9.324e-09	-0.0149	0.003	4.961e-07	0.3922	not_sig	0.00496611	0.00514522	-0.0020061	0.00470431	0.312432	not_sig	-0.00607694	0.0053255	0.0300667	0.00472237	3.38941e-07	sig	-0.0015605	0.0016476	-0.0011977	0.0021096	0.740965	not_sig	-0.016165	0.0033128	-0.0059179	0.0028806	0.0182052	not_sig
20	55836040	A	G	HDL	-0.0131	0.0019	6.6e-12	-0.0126	0.0022	7.509e-09	0.4102	not_sig	-0.00394952	0.00337028	-0.00406987	0.00308474	0.978774	not_sig	0.00632387	0.00348792	0.00205273	0.00309655	0.357687	not_sig	0.00066203	0.0010924	-0.0017352	0.0014004	0.193118	not_sig	-0.00018235	0.0021966	0.0043002	0.0019123	0.0914937	not_sig
20	62711459	T	C	HDL	-0.0105	0.0017	1.139e-09	-0.0155	0.002	2.744e-14	0.2767	not_sig	-0.00769775	0.00294911	-0.00934385	0.00270792	0.677943	not_sig	0.00341374	0.00305191	0.0283382	0.00271835	9.04591e-10	sig	-0.00017471	0.00095114	0.00035549	0.0012228	0.736223	not_sig	-0.0017395	0.0019125	0.0013111	0.0016698	0.199752	not_sig
21	16340289	T	C	HDL	0.0108	0.0017	5.486e-11	0.0054	0.0019	0.00486	0.01808	not_sig	-0.00127922	0.00297892	0.00129386	0.00272767	0.519933	not_sig	0.00357938	0.00307949	-0.00196331	0.0027386	0.176727	not_sig	-0.00040496	0.00096188	0.00067369	0.0012336	0.490192	not_sig	-0.0018026	0.0019321	0.00089702	0.0016836	0.263332	not_sig
21	30741454	A	G	HDL	-0.0086	0.0017	6.869e-07	-0.015	0.002	1.852e-14	0.0004554	not_sig	0.000865486	0.00300395	0.00315621	0.00276176	0.570702	not_sig	0.00711463	0.00310572	0.00822945	0.00277244	0.787957	not_sig	0.0023985	0.00096748	-0.00011632	0.0012461	0.0530492	not_sig	-9.6836e-05	0.0019434	-0.00054714	0.0017006	0.846465	not_sig
21	42653567	T	C	HDL	-0.0076	0.0017	9.825e-06	-0.0121	0.002	6.962e-10	0.1185	not_sig	0.0122903	0.00308864	0.0119565	0.002832	0.935873	not_sig	0.00122208	0.00319291	0.00516382	0.00284297	0.354406	not_sig	-2.9097e-05	0.0009925	0.001695	0.0012753	0.353571	not_sig	0.0022547	0.0019936	0.0037229	0.0017404	0.511497	not_sig
21	43721337	T	G	HDL	-0.0226	0.0039	7.56e-09	-0.0249	0.0045	3.055e-08	0.7984	not_sig	0.00103644	0.00733023	-0.0152742	0.0067716	0.0987624	not_sig	-0.00725032	0.00757893	-0.00949557	0.00679757	0.824692	not_sig	2.0805e-05	0.002358	0.00081004	0.0030518	0.861144	not_sig	0.0032454	0.0047364	-0.0035119	0.0041649	0.250768	not_sig
21	46271452	T	C	HDL	0.0157	0.0017	2.822e-21	0.0227	0.0019	8.089e-34	0.004255	not_sig	0.000276299	0.00294817	-0.00171339	0.00270638	0.615549	not_sig	-0.00139221	0.00304806	0.00126604	0.00271677	0.513166	not_sig	0.00065188	0.00095014	0.0014946	0.0012218	0.752254	not_sig	-0.0011576	0.0019085	0.0015459	0.0016675	0.251492	not_sig
21	46898174	T	C	HDL	-0.0194	0.002	5.306e-22	-0.0123	0.0023	9.141e-08	0.001885	not_sig	-0.000384108	0.00364242	0.00489747	0.0033494	0.280997	not_sig	0.00573444	0.00376624	-0.00149402	0.003362	0.1504	not_sig	0.00062604	0.0011662	0.0013316	0.0015018	0.841712	not_sig	-6.3426e-05	0.0023425	0.0010656	0.0020496	0.691101	not_sig
22	21958872	T	G	HDL	-0.0352	0.0018	8.935e-81	-0.034	0.0021	4.462e-58	0.1893	not_sig	0.000386209	0.00372979	-0.000245381	0.00342114	0.899696	not_sig	0.00587447	0.00385764	0.00408991	0.00343465	0.728569	not_sig	-4.2346e-05	0.0012026	-0.0020391	0.0015464	0.383119	not_sig	-0.00085363	0.0024186	-0.00047243	0.0021089	0.907781	not_sig
22	30914473	T	G	HDL	0.014	0.002	3.954e-12	0.0213	0.0023	1.69e-20	0.01105	not_sig	-0.00105421	0.00345791	-0.00191315	0.00318406	0.853568	not_sig	0.00349773	0.00357638	0.00233325	0.00319671	0.80736	not_sig	0.0017135	0.0011149	-0.0011488	0.0014391	0.0883952	not_sig	-0.00024887	0.0022421	-0.00066059	0.0019625	0.875715	not_sig
22	31507049	A	G	HDL	0.0153	0.0033	4.797e-06	0.0221	0.0036	1.011e-09	0.2985	not_sig	0.00142499	0.00509656	-0.0100753	0.00466234	0.0926363	not_sig	0.00773643	0.00527155	0.00160675	0.00467997	0.382449	not_sig	0.00071328	0.001648	-0.0020713	0.0021112	0.319868	not_sig	0.0037021	0.0033142	-0.0029345	0.0028792	0.106438	not_sig
22	36042986	T	C	HDL	0.0121	0.0018	8.175e-12	0.0096	0.002	1.123e-06	0.4444	not_sig	NA	NA	NA	NA	NA	NA	NA	NA	NA	NA	NA	NA	-0.0011864	0.00097777	0.0016972	0.0012533	0.065914	not_sig	-0.0020611	0.0019664	-0.00036266	0.0017091	0.50119	not_sig
22	38594668	A	G	HDL	0.0207	0.0016	2.838e-37	0.0153	0.0019	2.147e-16	0.03259	not_sig	0.00909444	0.00299415	0.0078267	0.00275999	0.75318	not_sig	0.00546921	0.00309674	-0.0163453	0.00277064	1.34186e-07	sig	-0.00055705	0.00096494	0.00021266	0.0012465	0.581191	not_sig	-0.00033498	0.0019406	-0.00025809	0.0016999	0.979593	not_sig
22	39133803	T	C	HDL	0.0118	0.0018	3.399e-11	0.0145	0.002	3.408e-13	0.7248	not_sig	0.00155743	0.00322484	-0.00332207	0.00296151	0.26031	not_sig	0.00348354	0.00333549	0.0106872	0.00297259	0.105351	not_sig	-1.1656e-05	0.0010391	-0.00074207	0.0013374	0.711446	not_sig	-0.0016571	0.0020897	0.00045949	0.0018239	0.420592	not_sig
22	44324730	T	C	HDL	0.0142	0.0019	1.835e-14	0.0107	0.0021	4.891e-07	0.5357	not_sig	0.00719367	0.00356252	0.00506441	0.00326868	0.656446	not_sig	-0.0139611	0.0036842	-0.0074251	0.0032813	0.183306	not_sig	0.0013306	0.0011489	-0.00082308	0.0014771	0.209676	not_sig	-0.00051859	0.0023106	0.0033651	0.0020144	0.166788	not_sig
3	12360494	T	C	HDL	0.0473	0.004	6.246e-33	0.0431	0.0043	8.844e-24	0.06116	not_sig	-0.00669239	0.00921251	-0.00724324	0.00836449	0.964336	not_sig	-0.0174928	0.00958363	-0.0317851	0.0084018	0.260021	not_sig	-0.0033817	0.0029914	-0.00029126	0.0038143	0.420746	not_sig	0.0045097	0.0060501	0.013437	0.0052236	0.208241	not_sig
3	15782711	A	C	HDL	0.0124	0.0018	4.105e-12	0.0115	0.0021	2.344e-08	0.3969	not_sig	-0.0082584	0.00311417	-0.0133541	0.0028642	0.223806	not_sig	-0.00031765	0.00323844	-0.0112394	0.00287649	0.0113216	not_sig	0.00015524	0.0010124	-0.00025269	0.0013066	0.804372	not_sig	0.00048878	0.0020476	0.00053999	0.0017894	0.975585	not_sig
3	24302811	A	G	HDL	0.0167	0.0025	1.858e-11	0.0203	0.0028	4.669e-13	0.8203	not_sig	-0.00630272	0.00476215	-0.00482882	0.00437893	0.818001	not_sig	-0.0139483	0.00495221	-0.00454849	0.00439852	0.154038	not_sig	-0.003999	0.0015422	0.00020266	0.0019913	0.0429551	not_sig	-0.001858	0.0031191	0.00023673	0.0027271	0.595631	not_sig
3	36960660	A	C	HDL	-0.0116	0.0017	1.852e-12	-0.015	0.0019	1.225e-15	0.3521	not_sig	0.00866161	0.00299446	0.004714	0.00274544	0.326357	not_sig	0.00030123	0.00311441	-0.00198861	0.00275751	0.580328	not_sig	-0.00022985	0.00096595	-0.0015603	0.0012428	0.498828	not_sig	0.0028252	0.0019536	-0.0008706	0.001702	0.131817	not_sig
3	47045846	T	C	HDL	0.0204	0.0022	4.731e-20	0.0201	0.0025	2.075e-15	0.8196	not_sig	0.0105866	0.00383415	0.00912094	0.00351442	0.775929	not_sig	-0.000276972	0.00398768	-0.00276742	0.00352891	0.638527	not_sig	-2.975e-05	0.0012486	-0.003245	0.001606	0.174016	not_sig	0.00049625	0.0025253	-0.00068011	0.0021994	0.705606	not_sig
3	50038664	A	G	HDL	0.0204	0.0016	8.337e-36	0.024	0.0019	2.392e-37	0.1385	not_sig	-0.0273571	0.00291949	-0.0259538	0.00268228	0.720705	not_sig	7.50829e-05	0.00303636	-0.00453456	0.00269414	0.254041	not_sig	-0.00072821	0.00094954	0.0014574	0.0012243	0.164214	not_sig	-0.0079635	0.0019204	-0.00032092	0.0016767	0.00180139	not_sig
3	52124388	T	C	HDL	0.0398	0.0068	6.174e-09	0.0442	0.0076	5.478e-09	0.8957	not_sig	0.00120075	0.0119668	0.00422738	0.0109026	0.850219	not_sig	-0.00862481	0.0124469	-0.0349335	0.0109534	0.110992	not_sig	0.0045345	0.003865	-0.0044958	0.0049394	0.131886	not_sig	0.0059141	0.007817	0.0066864	0.0067645	0.90951	not_sig
3	52838654	T	C	HDL	-0.0222	0.0024	1.633e-20	-0.0249	0.0028	6.68e-19	0.875	not_sig	-0.0113466	0.00444988	-0.000863227	0.00411379	0.0805846	not_sig	0.0176011	0.00462862	0.0274504	0.0041324	0.110858	not_sig	-0.00022947	0.0014463	-0.0011783	0.0018753	0.755909	not_sig	0.0067779	0.002925	0.0022366	0.0025682	0.235797	not_sig
3	57596105	T	C	HDL	-0.0097	0.002	1.978e-06	-0.0137	0.0024	6.346e-09	0.5051	not_sig	-0.0047193	0.00356815	0.00761182	0.00327306	0.010102	not_sig	-0.00392208	0.00371068	-0.00323521	0.00328696	0.889313	not_sig	-0.0017094	0.0011583	-0.0028102	0.0014908	0.863884	not_sig	-0.000192	0.0023427	-0.001867	0.0020416	0.551434	not_sig
3	62459819	A	C	HDL	0.0158	0.003	1.83e-07	0.0148	0.0034	1.511e-05	0.6964	not_sig	-0.0185711	0.00512009	-0.0284658	0.00470873	0.150789	not_sig	-0.0157357	0.00532529	-0.00532088	0.00472917	0.141891	not_sig	-0.0005811	0.0016212	0.001948	0.0020949	0.365144	not_sig	-0.010029	0.0032788	0.0036375	0.0028689	0.000903083	not_sig
3	66874481	A	C	HDL	-0.0094	0.0017	5.112e-08	-0.0077	0.002	8.492e-05	0.2751	not_sig	-0.00254171	0.00328276	-0.00597261	0.00301565	0.436921	not_sig	0.000405042	0.0034143	0.00791706	0.00302881	0.0983003	not_sig	0.00097165	0.0010622	0.00012531	0.0013688	0.530216	not_sig	-0.0021027	0.0021483	-0.00042156	0.0018746	0.543786	not_sig
3	69803691	A	T	HDL	-0.0082	0.002	3.173e-05	-0.0153	0.0022	6.398e-12	0.02567	not_sig	-0.00601827	0.00351163	-0.00716927	0.00321919	0.807202	not_sig	-0.00206532	0.00365247	0.013584	0.00323333	0.0012717	not_sig	-0.0013407	0.0011374	6.3496e-05	0.0014626	0.357702	not_sig	0.0040752	0.0023005	-0.00019745	0.0020031	0.142861	not_sig
3	70508703	C	G	HDL	0.0094	0.0016	6.353e-09	0.0086	0.0018	2.825e-06	0.5573	not_sig	-0.00921607	0.00296549	-0.00753019	0.00271839	0.672089	not_sig	-0.0075878	0.00308416	-0.00428349	0.00273046	0.420404	not_sig	0.00089876	0.00096307	0.0018388	0.0012391	0.758685	not_sig	0.00077153	0.0019478	0.0028422	0.0016969	0.36965	not_sig
3	71532738	T	C	HDL	-0.0119	0.0017	9.489e-13	-0.0066	0.0019	0.0006151	0.3684	not_sig	0.00473014	0.00292699	0.00479847	0.00268289	0.986132	not_sig	0.00842567	0.00304414	-0.00287861	0.00269446	0.00522342	not_sig	-0.00065069	0.00095136	-0.0014639	0.0012236	0.76488	not_sig	0.0037439	0.0019241	0.0031284	0.0016757	0.853949	not_sig
3	87037543	A	G	HDL	0.0175	0.003	9.348e-09	0.0182	0.0035	2.604e-07	0.6532	not_sig	0.0126891	0.00508376	0.0119255	0.00467958	0.911122	not_sig	0.00615337	0.0052882	-0.0154614	0.00469998	0.00215065	not_sig	0.00017979	0.0016554	0.0059878	0.0021377	0.0669831	not_sig	0.0031505	0.003348	0.002959	0.0029275	0.993437	not_sig
3	114753078	A	C	HDL	-0.018	0.0024	8.118e-14	-0.0181	0.0027	2.467e-11	0.7251	not_sig	0.00260273	0.00492956	0.00225049	0.00452819	0.957611	not_sig	-0.012339	0.00512579	0.0076706	0.00454818	0.00335878	not_sig	-0.0013923	0.0016031	0.002466	0.0020678	0.141774	not_sig	-0.0064634	0.0032423	-0.00056161	0.0028319	0.154645	not_sig
3	119529113	T	G	HDL	0.0242	0.003	3.098e-16	0.0317	0.0035	4.118e-20	0.2453	not_sig	0.00143438	0.00599612	-0.007697	0.00546137	0.255462	not_sig	-0.00824596	0.0062362	0.00730438	0.00548525	0.0600276	not_sig	0.0014229	0.0019331	0.0025779	0.0024713	0.879673	not_sig	-0.0021625	0.0039096	0.00079596	0.0033844	0.544794	not_sig
3	123065778	A	G	HDL	-0.0103	0.002	2.47e-07	-0.016	0.0023	2.925e-12	0.4591	not_sig	0.00972954	0.00339437	0.000403703	0.00311868	0.0410032	not_sig	0.00106991	0.00353046	0.000343139	0.00313223	0.877083	not_sig	0.00038083	0.0011075	0.0010497	0.0014268	0.808387	not_sig	-0.0014859	0.00224	-0.0014084	0.001954	0.999149	not_sig
3	129296847	A	G	HDL	0.0105	0.002	1.075e-07	0.0133	0.0022	2.825e-09	0.4907	not_sig	-0.00956534	0.00367573	-0.00349365	0.0033829	0.219577	not_sig	0.00184786	0.00382269	-0.0141342	0.0033979	0.00169751	not_sig	0.0013142	0.0011896	-0.0020889	0.0015351	0.0780246	not_sig	0.00023227	0.002406	-0.0016884	0.0021023	0.511567	not_sig
3	133478557	T	G	HDL	-0.0111	0.0016	5.819e-12	-0.0066	0.0018	0.0003096	0.4567	not_sig	0.000113104	0.00292886	-0.000441686	0.00269465	0.888027	not_sig	-0.00263846	0.00304617	0.00410175	0.00270645	0.0966292	not_sig	0.0011513	0.00095106	-0.0017458	0.0012279	0.0595956	not_sig	0.0012724	0.0019235	-0.00086978	0.0016816	0.371512	not_sig
3	135932359	T	C	HDL	0.0227	0.002	2.506e-30	0.0269	0.0022	2.894e-33	0.2596	not_sig	-0.0172701	0.0034752	-0.0181616	0.00319881	0.848805	not_sig	-0.00235427	0.00361437	-0.0116006	0.00321294	0.0548039	not_sig	-0.00070204	0.0011294	-0.00059716	0.0014588	0.850261	not_sig	0.0034598	0.0022841	0.0017684	0.0019978	0.582704	not_sig
3	150066540	A	T	HDL	0.0396	0.004	8.978e-23	0.0346	0.0045	1.113e-14	0.2137	not_sig	0.00292185	0.00638294	0.0134674	0.00587364	0.219461	not_sig	-0.00512524	0.00663579	-0.0705289	0.0058994	1.37607e-13	sig	0.0012689	0.0020296	0.0032402	0.0026219	0.708918	not_sig	0.000328	0.0041048	-0.0027562	0.0035906	0.536597	not_sig
3	152016969	T	C	HDL	-0.015	0.0018	2.153e-16	-0.0108	0.002	8.725e-08	0.234	not_sig	0.00433077	0.00317079	0.00571321	0.00291725	0.745877	not_sig	0.00314495	0.00329758	-0.00979072	0.00292959	0.00322364	not_sig	4.1307e-05	0.0010315	-0.0018033	0.0013317	0.339479	not_sig	-0.0018559	0.0020862	0.0012979	0.0018238	0.224974	not_sig
3	153851061	A	G	HDL	-0.008	0.0022	0.0002192	-0.017	0.0025	9.449e-12	0.01078	not_sig	-0.00939512	0.00450595	-0.0145763	0.00414303	0.392578	not_sig	0.00335293	0.00468648	0.0193788	0.00416116	0.0102178	not_sig	0.0032273	0.0014662	0.003229	0.0018911	0.621127	not_sig	0.0016565	0.0029654	0.0023526	0.0025898	0.827856	not_sig
3	156244888	T	C	HDL	-0.0099	0.0023	1.263e-05	-0.01	0.0026	0.0001111	0.2134	not_sig	0.00629224	0.00400373	0.00602156	0.00367079	0.959857	not_sig	0.00208775	0.00416472	0.016684	0.00368656	0.00839224	not_sig	-0.00070285	0.0012893	0.0013442	0.0016573	0.334812	not_sig	-0.0023146	0.0026076	-0.00015843	0.0022697	0.516779	not_sig
3	156797941	T	C	HDL	0.0242	0.0016	3.051e-50	0.0166	0.0019	3.98e-19	0.01365	not_sig	-0.0106566	0.00298651	0.00205317	0.0027462	0.0015554	not_sig	-0.0241424	0.00310567	-0.0344291	0.00275797	0.0128622	not_sig	0.0010124	0.00097058	-0.0012979	0.0012523	0.135105	not_sig	0.00026774	0.001963	0.00157	0.001715	0.579221	not_sig
3	171959684	A	G	HDL	-0.0096	0.0016	4.367e-09	-0.0073	0.0018	8.805e-05	0.5063	not_sig	-0.00377925	0.0029184	0.00176455	0.00268121	0.157677	not_sig	0.00899183	0.00303532	0.00408009	0.00269304	0.224065	not_sig	-0.00098258	0.0009491	-0.00063375	0.0012239	0.669128	not_sig	0.0037387	0.0019195	-0.0002521	0.0016761	0.101093	not_sig
3	185824004	T	C	HDL	0.0285	0.0024	5.351e-32	0.0314	0.0028	1.327e-29	0.9304	not_sig	0.0342502	0.0042509	0.032033	0.00390166	0.697923	not_sig	-0.00388741	0.0044212	7.80669e-05	0.00391906	0.500215	not_sig	-0.0011586	0.0013793	-0.0014635	0.0017772	0.942705	not_sig	0.0040927	0.0027895	0.0043709	0.0024338	0.885855	not_sig
3	195298892	T	C	HDL	-0.0256	0.0055	3.57e-06	-0.0324	0.0062	1.496e-07	0.2834	not_sig	0.00672931	0.00866941	0.0098487	0.0079212	0.788467	not_sig	-0.00962854	0.00901751	0.00249213	0.0079531	0.311291	not_sig	-0.00080009	0.0027743	-0.0018711	0.0035524	0.888688	not_sig	-0.0090311	0.0056109	-0.010891	0.0048649	0.732138	not_sig
3	196198533	T	C	HDL	0.008	0.0018	8.879e-06	0.0103	0.0021	5.188e-07	0.9172	not_sig	-0.0129753	0.00324088	-0.010242	0.00297417	0.530248	not_sig	0.00234004	0.00337025	-0.003567	0.00298679	0.187668	not_sig	-0.00082601	0.0010527	-0.00097686	0.0013559	0.919853	not_sig	-0.0027469	0.002129	-0.001137	0.0018569	0.567021	not_sig
4	965720	A	G	HDL	0.0121	0.0016	9.249e-14	0.015	0.0019	6.819e-16	0.3339	not_sig	-0.002444	0.00294972	-0.00637881	0.00270675	0.320835	not_sig	-0.0140055	0.0030622	-0.0213587	0.0027216	0.0714252	not_sig	0.0003196	0.00095464	-0.00011207	0.0012284	0.752795	not_sig	-0.0019781	0.0019287	0.00028241	0.001681	0.353375	not_sig
4	2260812	T	C	HDL	0.0118	0.0021	3.357e-08	0.013	0.0025	1.463e-07	0.7071	not_sig	-0.00911411	0.00432199	-0.0104119	0.00396305	0.823113	not_sig	0.00365722	0.00448769	-0.00701694	0.00398452	0.0740205	not_sig	-0.00089435	0.0014	0.00083339	0.0017996	0.424818	not_sig	-0.0015077	0.0028285	-0.0010856	0.0024625	0.919169	not_sig
4	3241845	T	C	HDL	0.0202	0.0034	3.572e-09	0.0173	0.0038	4.292e-06	0.1251	not_sig	-0.0284074	0.00566302	-0.0234262	0.00517881	0.512065	not_sig	-0.00260766	0.00587836	-0.00192896	0.00520724	0.930826	not_sig	0.0038179	0.0018142	0.0093978	0.0023309	0.247294	not_sig	-0.00043949	0.0036654	0.00069526	0.0031897	0.801353	not_sig
4	4990298	A	G	HDL	0.0072	0.0018	7.695e-05	0.0163	0.0021	5.322e-15	0.0003197	not_sig	0.0114475	0.00293965	0.00396572	0.00269561	0.0581308	not_sig	-0.00558845	0.00305233	-0.0304958	0.00271044	8.86602e-10	sig	-0.00069694	0.00095664	-0.00048049	0.0012303	0.776466	not_sig	-9.7837e-05	0.0019328	0.0013543	0.0016836	0.535049	not_sig
4	17957688	A	T	HDL	0.0131	0.0022	4.993e-09	0.0158	0.0026	1.242e-09	0.4717	not_sig	-0.00075688	0.00399811	-0.0147303	0.00367433	0.00934369	not_sig	-0.0109749	0.00415107	-0.00471173	0.00369432	0.257605	not_sig	-0.0026735	0.0012989	-0.00026711	0.001674	0.148758	not_sig	0.00056434	0.0026242	0.00034901	0.0022907	0.952971	not_sig
4	26047616	A	G	HDL	-0.019	0.0023	3.876e-16	-0.0236	0.0027	8.433e-19	0.7409	not_sig	0.00189471	0.00389877	0.0133207	0.00359093	0.0294563	not_sig	0.00378643	0.00404741	0.0313884	0.00361009	3.19092e-07	sig	0.00042352	0.0012677	0.001312	0.0016367	0.767421	not_sig	-0.0021957	0.0025613	0.00018174	0.0022397	0.464146	not_sig
4	39698824	A	G	HDL	-0.0067	0.0016	4.387e-05	-0.0126	0.0019	1.116e-11	0.1616	not_sig	0.000965803	0.00292229	0.00145747	0.0026821	0.900365	not_sig	-0.000618132	0.00303371	0.000794042	0.00269668	0.726753	not_sig	-0.0005597	0.00095416	-0.0016219	0.001228	0.647066	not_sig	-0.00027799	0.0019278	0.0010822	0.0016804	0.563031	not_sig
4	45186139	A	G	HDL	0.0118	0.0016	3.772e-13	0.0071	0.0019	0.0001334	0.005707	not_sig	-0.0319093	0.00295147	-0.0274929	0.00271149	0.265709	not_sig	0.00315864	0.00306418	0.00192138	0.00272658	0.761904	not_sig	0.00082975	0.00095918	0.00088047	0.001236	0.867712	not_sig	-0.00047706	0.0019379	0.005556	0.0016913	0.0102689	not_sig
4	69339933	A	G	HDL	0.0166	0.0021	8.741e-16	0.0139	0.0024	8.467e-09	0.5516	not_sig	-0.00567735	0.00345169	-0.00800869	0.00317017	0.615351	not_sig	0.00817402	0.00358441	-0.00535589	0.00318778	0.00461102	not_sig	0.0013221	0.0011219	-0.0016579	0.0014454	0.0945605	not_sig	0.0034132	0.0022667	-0.0021107	0.0019779	0.0506156	not_sig
4	74512280	A	G	HDL	-0.1374	0.0285	1.379e-06	-0.1872	0.0304	7.13e-10	0.2652	not_sig	-0.05851	0.0851652	0.175411	0.0873083	0.052714	not_sig	0.0182269	0.0884368	0.072329	0.0877945	0.662777	not_sig	NA	NA	NA	NA	NA	NA	NA	NA	NA	NA	NA	NA
4	76572191	A	C	HDL	0.0068	0.0017	4.242e-05	0.0134	0.0019	1.25e-12	0.02702	not_sig	-0.00641147	0.00293382	-0.00906711	0.00269292	0.500594	not_sig	0.00500359	0.00304622	-0.00288867	0.00270755	0.0517718	not_sig	6.9046e-05	0.00095254	0.0015524	0.001226	0.41864	not_sig	-0.0029201	0.0019245	0.0036393	0.0016776	0.00578695	not_sig
4	83907105	A	G	HDL	0.0115	0.0018	4.459e-10	0.0107	0.0021	4.069e-07	0.7448	not_sig	-0.00316905	0.00334631	-0.00777457	0.00306655	0.30542	not_sig	-0.00239607	0.00347391	-0.00498393	0.00308351	0.575762	not_sig	0.00065564	0.0010862	-0.00083851	0.0013964	0.386974	not_sig	0.0031919	0.0021946	0.0024373	0.0019109	0.822453	not_sig
4	88050554	A	G	HDL	0.0156	0.0016	2.673e-22	0.0167	0.0018	5.652e-20	0.8698	not_sig	-0.00128011	0.00299609	-0.00802861	0.00274309	0.0933456	not_sig	-0.00466204	0.00311048	-0.00703999	0.00275812	0.565608	not_sig	-0.00038872	0.00097228	0.00088292	0.0012484	0.433167	not_sig	0.00059031	0.0019644	-0.0025836	0.0017083	0.184502	not_sig
4	89730074	T	C	HDL	0.0164	0.0016	4.856e-25	0.0236	0.0018	1.571e-38	0.001538	not_sig	0.0118168	0.0029339	0.00354637	0.00269029	0.0358564	not_sig	-0.00832496	0.00304599	-0.0441693	0.00270507	9.77242e-19	sig	-0.00027692	0.00095215	0.0015695	0.0012244	0.274238	not_sig	-0.0016451	0.0019237	-0.00030754	0.0016755	0.58887	not_sig
4	99788480	T	C	HDL	-0.0072	0.0017	1.484e-05	-0.0106	0.0019	1.929e-08	0.9356	not_sig	0.00543268	0.00312151	0.0043275	0.00285872	0.79199	not_sig	0.00778013	0.00324102	0.00773688	0.00287442	0.991999	not_sig	-0.00098032	0.0010029	-0.0021262	0.0012888	0.699738	not_sig	-0.00168	0.0020263	0.00010762	0.0017637	0.486046	not_sig
4	100465173	A	G	HDL	-0.0295	0.0032	8.044e-20	-0.0285	0.0037	3.087e-14	0.8604	not_sig	-0.00136217	0.00747301	-0.00388002	0.00690964	0.802685	not_sig	0.00834981	0.00776003	0.00470002	0.00694823	0.724879	not_sig	-0.0037584	0.0024257	0.00065808	0.0031443	0.190476	not_sig	0.0041351	0.0049009	0.00051705	0.0043027	0.565666	not_sig
4	103188709	T	C	HDL	0.0892	0.0035	1.16e-144	0.0732	0.0041	2.05e-71	0.0008089	not_sig	-0.0485083	0.00552257	-0.046728	0.00512715	0.811395	not_sig	0.0270112	0.00573435	0.0382485	0.00515512	0.143258	not_sig	0.0027925	0.001796	0.0036811	0.002338	0.930431	not_sig	0.0049585	0.0036285	0.0090149	0.0031992	0.328274	not_sig
4	103766720	A	G	HDL	0.0422	0.005	5.117e-17	0.03	0.0058	2.162e-07	0.2072	not_sig	-0.0230011	0.00799429	-0.00752205	0.00733113	0.149472	not_sig	-0.000482072	0.00829697	0.0047528	0.00737172	0.635681	not_sig	-0.00053479	0.002556	0.0011868	0.0032942	0.686424	not_sig	0.0022888	0.0051642	0.00040103	0.0045078	0.776309	not_sig
4	106081636	T	C	HDL	-0.008	0.0017	2.58e-06	-0.0155	0.0019	7.015e-16	0.01834	not_sig	-0.00304762	0.00302498	0.00396757	0.00276879	0.0840108	not_sig	-0.000913643	0.00314046	0.0214983	0.00278396	8.14709e-08	sig	0.0022208	0.00098354	0.0039572	0.0012633	0.668888	not_sig	0.0047729	0.0019871	0.0039703	0.0017287	0.814343	not_sig
4	110095620	T	C	HDL	-0.1052	0.0122	7.81e-18	-0.1255	0.0135	1.222e-20	0.3404	not_sig	0.00547574	0.0182063	0.0153048	0.0165692	0.686738	not_sig	-0.0063128	0.0188951	-0.0254001	0.0166615	0.446646	not_sig	-0.0032225	0.0058409	-0.0070144	0.0074565	0.825391	not_sig	0.00089543	0.011801	0.0092878	0.010204	0.552329	not_sig
4	110638824	T	C	HDL	0.11	0.0118	8.207e-21	0.1411	0.0134	4.975e-26	0.3542	not_sig	NA	NA	NA	NA	NA	NA	NA	NA	NA	NA	NA	NA	0.0076078	0.0055876	0.010559	0.0071674	0.978783	not_sig	-0.0045171	0.011289	-0.0083367	0.0098079	0.76624	not_sig
4	143319721	T	C	HDL	-0.0096	0.0017	8.379e-09	-0.0094	0.0019	6.973e-07	0.987	not_sig	-0.00240618	0.00300087	-0.000658998	0.00275179	0.664701	not_sig	0.00366023	0.00311556	-0.00260545	0.00276668	0.130943	not_sig	0.0010844	0.00097409	0.0035584	0.001253	0.273318	not_sig	0.002826	0.001968	0.0010325	0.0017146	0.486936	not_sig
4	151199080	A	G	HDL	0.0128	0.0018	4.334e-12	0.0078	0.0021	0.0001573	0.05203	not_sig	-0.00193531	0.00322329	0.00215393	0.00296145	0.34537	not_sig	0.00193414	0.00334653	0.00112454	0.00297779	0.855952	not_sig	-5.3417e-05	0.0010474	0.0013112	0.0013498	0.483063	not_sig	0.0016679	0.0021162	0.0043006	0.001847	0.288016	not_sig
4	154208278	T	C	HDL	0.0185	0.0024	4.213e-14	0.0152	0.0027	2.775e-08	0.7793	not_sig	-0.00260417	0.00417401	0.000805616	0.00381216	0.542354	not_sig	0.0135742	0.00433334	-0.00509545	0.00383345	0.00119048	not_sig	0.0022242	0.0013537	0.0010511	0.0017342	0.406183	not_sig	-2.4756e-05	0.0027349	0.0021994	0.0023731	0.499976	not_sig
4	157682598	T	C	HDL	0.0189	0.0018	7.918e-25	0.016	0.0021	2.968e-14	0.1752	not_sig	0.00325514	0.00351063	-0.0018698	0.00321576	0.276906	not_sig	-0.00933008	0.00364467	-0.0160223	0.00323338	0.167706	not_sig	-0.00059085	0.0011377	0.00016068	0.0014614	0.640299	not_sig	0.00044678	0.0022986	-0.00135	0.0019998	0.522271	not_sig
5	665148	A	G	HDL	0.0101	0.0022	3.98e-06	0.0136	0.0025	6.483e-08	0.7175	not_sig	-0.00586634	0.00365168	-0.00700257	0.00334431	0.816717	not_sig	-0.00144829	0.00378877	-0.00871724	0.003361	0.149428	not_sig	0.0024058	0.0011885	-0.0032635	0.0015259	0.00282432	not_sig	-0.00068305	0.0023974	-0.001048	0.0020894	0.890294	not_sig
5	1284135	T	C	HDL	0.009	0.0018	5.397e-07	0.0093	0.0021	7.845e-06	0.6776	not_sig	0.00260696	0.00313935	0.000890589	0.00288239	0.684174	not_sig	-0.0023318	0.00325712	-0.0100163	0.00289643	0.0765917	not_sig	0.00063172	0.0010144	-0.0012245	0.0013065	0.267283	not_sig	-0.00061555	0.002046	-0.00016994	0.001789	0.866876	not_sig
5	39451982	T	C	HDL	-0.0207	0.004	2.726e-07	-0.0346	0.0044	1.915e-15	0.005763	not_sig	-0.0197637	0.00766729	-0.0197587	0.0069871	0.999612	not_sig	0.000375629	0.00795545	0.00474957	0.0070192	0.678808	not_sig	0.0019661	0.0024926	-0.0016932	0.0031862	0.337925	not_sig	0.0020398	0.0050278	0.0041667	0.0043629	0.712901	not_sig
5	52697383	A	G	HDL	0.0119	0.0016	5.344e-13	0.0077	0.0018	2.917e-05	0.2301	not_sig	4.61328e-05	0.00293551	-0.00224535	0.00268933	0.560994	not_sig	-0.0100289	0.00304555	-0.00440477	0.00270234	0.16532	not_sig	0.0020838	0.00095224	0.0011318	0.0012234	0.306317	not_sig	0.0010994	0.0019208	0.0021101	0.0016752	0.645894	not_sig
5	53276301	A	G	HDL	0.0174	0.0018	2.637e-23	0.007	0.002	0.0004719	7.363e-06	sig	0.016907	0.00316766	0.00272528	0.00291012	0.000868231	not_sig	-0.00689254	0.00328632	0.00467936	0.00292416	0.00823627	not_sig	-0.00037654	0.0010335	0.0004931	0.0013308	0.597697	not_sig	-0.00018617	0.0020847	0.0032531	0.0018223	0.173555	not_sig
5	55808475	T	C	HDL	0.0259	0.0017	4.691e-50	0.0257	0.002	7.259e-38	0.6656	not_sig	0.000535571	0.00335011	-0.00142783	0.00307528	0.662775	not_sig	0.036827	0.00347644	0.0241546	0.00309017	0.00620969	not_sig	-0.0010235	0.0010884	0.0018928	0.0014008	0.102823	not_sig	-0.001469	0.0021953	0.0022553	0.0019182	0.16892	not_sig
5	67714246	A	G	HDL	-0.0105	0.0017	2.859e-10	-0.0166	0.002	4.679e-17	0.1026	not_sig	-0.0071451	0.00305789	-0.00446704	0.00280284	0.514335	not_sig	-0.0112387	0.00317286	0.00857848	0.00281688	2.7144e-06	sig	-0.00014585	0.00098011	0.0011429	0.0012596	0.464986	not_sig	-0.0035777	0.001977	0.0012542	0.0017248	0.0514016	not_sig
5	72919127	C	G	HDL	-0.015	0.0019	1.068e-15	-0.0114	0.0021	9.566e-08	0.2585	not_sig	0.00697974	0.00325599	0.00646674	0.00298976	0.906687	not_sig	0.000560546	0.00337835	-0.00625974	0.00300436	0.129712	not_sig	0.0017425	0.0010577	0.00063022	0.0013615	0.353476	not_sig	2.1102e-05	0.0021336	-0.00059759	0.0018644	0.810737	not_sig
5	75003678	T	C	HDL	0.0166	0.0017	5.676e-23	0.0162	0.0019	3.093e-17	0.7488	not_sig	-0.0257135	0.00299482	-0.0302897	0.00274174	0.25496	not_sig	0.00701416	0.00310726	-0.00651432	0.0027551	0.00106766	not_sig	0.00068345	0.00097443	-0.0010218	0.0012512	0.277389	not_sig	-0.0053761	0.0019655	-0.0011871	0.0017132	0.0986636	not_sig
5	75700310	T	C	HDL	-0.0124	0.0019	3.06e-11	-0.0083	0.0021	5.641e-05	0.4317	not_sig	-0.00470461	0.00308824	0.000129608	0.0028339	0.24404	not_sig	-0.000716136	0.00320458	-0.00059761	0.00284777	0.977846	not_sig	-0.00093299	0.0010014	0.00019208	0.0012883	0.420763	not_sig	0.0012161	0.00202	0.00050747	0.0017641	0.7908	not_sig
5	78543716	T	G	HDL	0.0083	0.0017	4.643e-07	0.0077	0.0019	5.208e-05	0.4432	not_sig	-0.00168386	0.0030105	-0.00848757	0.00276471	0.0927053	not_sig	-0.0018068	0.00312345	-0.000787649	0.00277802	0.806545	not_sig	0.00046964	0.00097769	-0.0012422	0.0012585	0.300322	not_sig	-0.0024204	0.0019721	-0.0035525	0.0017233	0.598973	not_sig
5	82815158	A	G	HDL	0.0307	0.0043	1.429e-12	0.024	0.0049	9.568e-07	0.02098	not_sig	0.0177142	0.00736444	0.00294921	0.00672583	0.134839	not_sig	-0.0347262	0.00764278	-0.0144557	0.00675877	0.0459817	not_sig	0.0014422	0.0023946	-0.003001	0.003064	0.262038	not_sig	-0.0034928	0.0048301	-0.005567	0.0041956	0.699253	not_sig
5	96105926	A	G	HDL	-0.0092	0.0016	1.664e-08	-0.0076	0.0019	4.606e-05	0.5377	not_sig	0.00219183	0.00293936	-0.00215412	0.00269727	0.271187	not_sig	-0.000624532	0.00304957	0.0011428	0.00271037	0.663499	not_sig	-0.0026603	0.00095355	-0.00014469	0.0012267	0.0427584	not_sig	-0.00059933	0.0019234	0.001629	0.0016797	0.344286	not_sig
5	112379659	T	C	HDL	-0.0099	0.0017	2.102e-09	-0.0088	0.0019	2.34e-06	0.5016	not_sig	0.00577987	0.00294491	0.00783461	0.00269835	0.603341	not_sig	-0.00344355	0.0030558	0.0133733	0.00271161	3.55786e-05	sig	-0.0014069	0.00095347	0.0008202	0.001225	0.116206	not_sig	0.001864	0.0019232	0.0010908	0.0016774	0.769845	not_sig
2	227101309	T	C	HDL	-0.0433	0.0017	2.53e-141	-0.03	0.002	1.13e-52	8.859e-07	sig	-0.00562893	0.00304348	0.000384556	0.00278785	0.141119	not_sig	-0.00344378	0.00316574	0.015059	0.0028033	1.10766e-05	sig	-7.7984e-05	0.00099329	-0.0023601	0.001276	0.229875	not_sig	0.0017057	0.0020123	-0.0037397	0.0017526	0.0273347	not_sig
5	127357526	T	C	HDL	-0.012	0.002	1.942e-09	-0.0137	0.0022	5.999e-10	0.8431	not_sig	-0.0133914	0.00339886	-0.00219192	0.00312025	0.0142172	not_sig	0.0191888	0.00352699	0.0165786	0.00313553	0.578526	not_sig	-0.00015024	0.0011027	-0.00040058	0.0014195	0.92859	not_sig	-0.00073828	0.0022243	-0.0033152	0.0019438	0.330968	not_sig
5	129196638	A	T	HDL	0.0089	0.0016	7.591e-08	0.0084	0.0019	8.044e-06	0.4629	not_sig	-0.00153483	0.00307871	-0.00223438	0.00282226	0.865657	not_sig	-0.00541021	0.00319433	-0.00403216	0.00283595	0.745913	not_sig	-0.00046096	0.0009996	-0.00086721	0.0012851	0.911128	not_sig	0.00048566	0.0020163	-0.0033428	0.0017597	0.118371	not_sig
5	131008194	T	C	HDL	0.0156	0.003	2.408e-07	0.0224	0.0035	1.15e-10	0.3539	not_sig	0.0102702	0.00625363	0.0193605	0.00572036	0.278655	not_sig	-0.00859628	0.0064875	-0.0290242	0.00574809	0.0179233	not_sig	0.0015551	0.0020342	-0.00093531	0.002606	0.410843	not_sig	0.0038215	0.0041031	0.00076528	0.0035684	0.562763	not_sig
5	132444128	A	G	HDL	-0.0256	0.0031	9.045e-17	-0.0244	0.0035	1.395e-12	0.8365	not_sig	0.000366053	0.0050414	0.00228183	0.00463276	0.777468	not_sig	0.0288236	0.00523106	0.0334814	0.00465461	0.504046	not_sig	-0.001225	0.0016401	0.0010772	0.0021125	0.362026	not_sig	-0.0031128	0.0033082	0.00099465	0.0028927	0.323277	not_sig
5	134444982	A	C	HDL	0.0112	0.0017	1.286e-11	0.0088	0.0019	3.453e-06	0.03652	not_sig	-0.00471758	0.0029719	-0.00699195	0.00273365	0.569416	not_sig	-0.00230388	0.00308377	-0.000794429	0.00274711	0.713541	not_sig	0.00047619	0.00096506	0.001248	0.0012449	0.754747	not_sig	-0.0036968	0.0019466	-0.0017383	0.0017047	0.451638	not_sig
5	141542219	G	GA	HDL	0.0105	0.0019	1.816e-08	0.0089	0.0022	7.28e-05	0.1079	not_sig	-0.00179005	0.00325611	-0.00285229	0.00298254	0.80802	not_sig	-0.00214705	0.00337873	0.0026533	0.00299724	0.285735	not_sig	NA	NA	NA	NA	NA	NA	NA	NA	NA	NA	NA	NA
5	148844793	T	G	HDL	0.0119	0.0019	8.657e-10	0.0065	0.0022	0.002751	0.08871	not_sig	0.00511198	0.00343126	0.000272898	0.0031472	0.293825	not_sig	0.00100131	0.00356007	0.00080833	0.00316251	0.967531	not_sig	0.00095814	0.0011035	-0.0020544	0.0014185	0.10043	not_sig	-0.0032049	0.0022258	-0.00036902	0.0019424	0.319837	not_sig
5	153444950	A	G	HDL	-0.0112	0.0017	3.149e-11	-0.011	0.002	2.086e-08	0.6163	not_sig	0.0139088	0.00302158	0.0123143	0.0027732	0.69455	not_sig	-0.000960447	0.00313499	-0.00630165	0.00278674	0.200899	not_sig	0.00063838	0.00098071	-4.3051e-05	0.0012625	0.60684	not_sig	-0.00067257	0.0019782	0.00047581	0.0017287	0.641139	not_sig
5	158020425	A	G	HDL	-0.0189	0.0018	4.944e-25	-0.0198	0.0021	5.463e-21	0.911	not_sig	-0.00437924	0.00351878	-0.0105457	0.00322895	0.192173	not_sig	-0.0163302	0.00365099	-0.000179745	0.00324457	0.000896441	not_sig	-0.00084237	0.001132	-0.0011609	0.001456	0.985339	not_sig	-0.0038528	0.0022834	-0.0033398	0.0019937	0.907805	not_sig
5	158622532	A	C	HDL	-0.0105	0.0018	1.124e-08	-0.0117	0.0021	1.391e-08	0.7273	not_sig	-0.00500657	0.00339789	-0.00151508	0.00311868	0.444491	not_sig	0.00249398	0.00352521	0.00212844	0.00313381	0.937955	not_sig	0.00031507	0.0011019	0.0013239	0.0014186	0.67398	not_sig	0.00037995	0.0022226	-0.00041526	0.0019425	0.77269	not_sig
5	170612546	A	G	HDL	0.0123	0.0018	9.758e-12	0.0075	0.002	0.0002169	0.2899	not_sig	-0.0152673	0.00315801	-0.0174225	0.00290911	0.612161	not_sig	0.00644197	0.00327638	-0.00119283	0.00292323	0.0807313	not_sig	-0.00014211	0.0010208	-0.00010755	0.0013182	0.960765	not_sig	-0.0021447	0.002059	-0.0051444	0.0018051	0.21253	not_sig
5	172591337	T	G	HDL	0.0146	0.0026	1.88e-08	0.0115	0.0029	7.796e-05	0.3941	not_sig	0.00412302	0.00433227	0.00598667	0.00395652	0.748334	not_sig	0.00520537	0.00449396	-0.00397498	0.00397595	0.124361	not_sig	-0.00052332	0.0014088	-0.0007912	0.0018034	0.98628	not_sig	-0.0021732	0.0028417	0.00023883	0.0024694	0.501524	not_sig
5	173356752	C	G	HDL	0.0141	0.0018	9.759e-15	0.0068	0.0021	0.001003	0.0009433	not_sig	0.0115204	0.00318829	0.00911819	0.00292209	0.574774	not_sig	-0.0213451	0.00330771	-0.0352442	0.00293595	0.00159673	not_sig	-0.00084341	0.0010344	-0.00016942	0.0013294	0.596761	not_sig	-0.0042518	0.0020865	-0.0063633	0.0018203	0.356268	not_sig
5	176551103	A	C	HDL	-0.0161	0.0022	1.161e-13	-0.0178	0.0024	2.152e-13	0.84	not_sig	-0.0011219	0.00420365	-0.00052334	0.0038549	0.915583	not_sig	0.0161437	0.00436159	0.00451654	0.00387392	0.0452914	not_sig	0.0012671	0.0013659	-0.003441	0.0017558	0.04173	not_sig	-0.0027541	0.0027552	-0.0048626	0.0024043	0.499658	not_sig
5	180349778	T	C	HDL	0.0832	0.0101	1.83e-16	0.0537	0.0115	2.737e-06	0.07989	not_sig	0.0125989	0.0177497	0.0290409	0.0159258	0.486183	not_sig	-0.0648221	0.018414	-0.0403605	0.0160067	0.313937	not_sig	NA	NA	NA	NA	NA	NA	NA	NA	NA	NA	NA	NA
6	16810627	T	G	HDL	-0.0111	0.0018	3.241e-10	-0.0121	0.002	2.139e-09	0.9765	not_sig	0.00298853	0.00321514	0.00422301	0.00295678	0.775293	not_sig	0.00255174	0.00333531	0.00243096	0.00296196	0.978303	not_sig	-0.0010223	0.0010416	-0.00026723	0.0013429	0.545515	not_sig	-0.00037433	0.0021039	-0.00080072	0.0018396	0.86108	not_sig
6	26200677	A	G	HDL	0.0097	0.0017	2.05e-08	0.0099	0.002	7.51e-07	0.8319	not_sig	-0.0130799	0.0032861	-0.0138512	0.00300726	0.861164	not_sig	0.00104288	0.00340932	0.0127484	0.00301216	0.00975603	not_sig	-0.0020209	0.001067	0.0026893	0.0013692	0.00562517	not_sig	-0.002213	0.0021554	-0.0042737	0.0018756	0.403639	not_sig
6	28052823	A	C	HDL	-0.0137	0.0024	1.226e-08	-0.0136	0.0027	6.648e-07	0.3014	not_sig	0.0195662	0.0040692	0.0113909	0.00373581	0.134957	not_sig	-0.0271442	0.00422138	-0.0210455	0.00374152	0.277505	not_sig	-0.003112	0.0013196	-0.0041137	0.0016985	0.897751	not_sig	-0.0070296	0.0026656	-0.0048565	0.0023267	0.571971	not_sig
6	29915061	T	C	HDL	0.0111	0.0018	1.37e-09	0.011	0.0022	4.002e-07	0.2984	not_sig	-0.00674201	0.00303771	-0.00985871	0.00279179	0.44545	not_sig	0.0174621	0.00315123	0.0156532	0.00279637	0.666287	not_sig	0.00091076	0.00098517	0.0020655	0.0012696	0.679781	not_sig	0.0032046	0.00199	0.00024204	0.0017392	0.244187	not_sig
6	30764907	A	G	HDL	0.0147	0.0024	1.002e-09	0.0184	0.0029	1.232e-10	0.6233	not_sig	-0.0136982	0.00377748	-0.011501	0.00347884	0.665624	not_sig	0.0242876	0.00391843	0.0138905	0.00348405	0.0464078	not_sig	0.0027805	0.001226	0.0024323	0.0015828	0.509289	not_sig	0.0081618	0.0024765	0.0060985	0.0021681	0.581044	not_sig
6	31302029	A	G	HDL	-0.0202	0.0017	9.533e-32	-0.017	0.002	3.601e-17	0.006657	not_sig	0.0081632	0.00305825	0.00765396	0.00281619	0.901535	not_sig	-0.010542	0.00317264	0.00153579	0.00282065	0.00426852	not_sig	-0.0012926	0.00098532	-0.0013486	0.0012717	0.791183	not_sig	-0.0028139	0.0019903	-0.0013063	0.0017421	0.570396	not_sig
6	32596370	T	C	HDL	0.035	0.0045	7.526e-15	0.044	0.0049	3.421e-19	0.5152	not_sig	-0.00177444	0.00760853	-0.0017867	0.0069766	0.999043	not_sig	0.00569903	0.00789235	0.000911733	0.00698656	0.648256	not_sig	-0.0018152	0.0024684	-0.0019345	0.0031712	0.888665	not_sig	-0.0013939	0.0049861	-0.0036722	0.004344	0.696432	not_sig
6	34141700	A	C	HDL	0.0414	0.0052	1.268e-15	0.0445	0.0057	8.068e-15	0.4746	not_sig	0.022344	0.00756915	0.025385	0.0069395	0.764852	not_sig	-0.0494475	0.00785382	-0.109954	0.00695056	6.84398e-09	sig	-0.0012388	0.0024557	-0.0010358	0.0031533	0.874862	not_sig	-0.014215	0.0049605	-0.0053136	0.0043194	0.171431	not_sig
6	34658080	A	C	HDL	0.0302	0.0017	4.369e-72	0.0243	0.0019	5.528e-37	0.00331	not_sig	-0.0218525	0.00304841	-0.027578	0.00280351	0.162609	not_sig	0.00451931	0.00316258	0.00677796	0.00280816	0.591686	not_sig	-0.00076502	0.00098703	-0.00068005	0.0012722	0.825956	not_sig	-0.0033363	0.0019938	-0.0042242	0.0017427	0.661484	not_sig
6	35476562	A	T	HDL	0.0192	0.0027	2.887e-12	0.0125	0.0031	5.929e-05	0.588	not_sig	-0.0141866	0.00462853	-0.0139066	0.00426165	0.964146	not_sig	0.00398565	0.00480167	0.00808369	0.00426792	0.521707	not_sig	-0.0019402	0.0014948	0.0012337	0.0019288	0.156926	not_sig	-0.0087694	0.0030194	-0.0019483	0.0026422	0.0806223	not_sig
6	36477260	A	G	HDL	0.0144	0.0019	1.302e-13	0.006	0.0022	0.006472	0.02198	not_sig	-0.00513237	0.003751	-2.23461e-05	0.003429	0.309823	not_sig	0.00246633	0.00389142	0.00861538	0.00343494	0.234092	not_sig	-0.00027438	0.0012164	-0.00079632	0.0015596	0.859596	not_sig	0.0024915	0.0024571	0.0047184	0.0021363	0.42738	not_sig
6	41986427	T	C	HDL	0.0159	0.0019	6.803e-17	0.0191	0.0022	1.361e-18	0.7577	not_sig	-0.0103259	0.00341367	-0.00826834	0.00312433	0.653361	not_sig	0.0118444	0.00354161	0.00867075	0.00312936	0.500007	not_sig	-0.00047761	0.0011069	-0.0016724	0.0014194	0.634363	not_sig	0.00074462	0.0022358	-0.0019194	0.0019444	0.330072	not_sig
6	42940810	T	C	HDL	0.0146	0.0016	5.729e-19	0.0172	0.0019	3.09e-20	0.9864	not_sig	0.00114318	0.00293095	-0.000260093	0.00269107	0.721678	not_sig	0.00277521	0.00304049	0.00408791	0.00269569	0.745575	not_sig	-0.0022043	0.00095047	0.0004351	0.0012233	0.0462339	not_sig	0.004373	0.0019199	0.0035891	0.0016757	0.807785	not_sig
6	43760327	C	G	HDL	-0.033	0.0016	5.9e-92	-0.0299	0.0019	1.241e-56	0.04947	not_sig	-0.0163229	0.00292214	-0.00870648	0.00268355	0.0524958	not_sig	0.0285439	0.00303148	0.0673201	0.00268801	7.05502e-22	sig	0.00082103	0.00094829	-0.00089255	0.0012209	0.249277	not_sig	0.00045912	0.0019155	0.0010977	0.0016725	0.774995	not_sig
6	52627165	A	G	HDL	0.012	0.0018	6.195e-12	0.0154	0.002	9.292e-15	0.4733	not_sig	0.00198769	0.00306266	-0.000244384	0.00280225	0.587063	not_sig	0.00294916	0.00317737	0.00632892	0.00280679	0.423297	not_sig	-0.00078429	0.00099303	0.0020195	0.0012734	0.0936447	not_sig	-0.0019807	0.0020059	0.00046295	0.0017444	0.332605	not_sig
6	86302034	A	G	HDL	-0.009	0.0016	2.316e-08	-0.0089	0.0018	1.283e-06	0.692	not_sig	0.00637999	0.00292992	0.00314769	0.00269301	0.41199	not_sig	-0.00659247	0.00303975	-0.00805648	0.00269742	0.717481	not_sig	-6.0745e-05	0.00095036	-0.0010649	0.0012244	0.585613	not_sig	-0.0015561	0.0019197	0.00080913	0.0016773	0.324312	not_sig
6	107444903	C	G	HDL	-0.0086	0.0018	1.771e-06	-0.0096	0.0021	4.314e-06	0.9176	not_sig	0.00143164	0.00317169	0.00488024	0.00290478	0.417998	not_sig	-0.00119725	0.00329066	0.00737691	0.00290958	0.0499248	not_sig	-0.0013562	0.0010241	0.0012874	0.0013151	0.0954292	not_sig	-0.0022798	0.0020686	-0.0019893	0.0018014	0.943794	not_sig
6	109064220	T	C	HDL	-0.017	0.0029	2.738e-09	-0.02	0.0033	2.219e-09	0.7688	not_sig	NA	NA	NA	NA	NA	NA	NA	NA	NA	NA	NA	NA	NA	NA	NA	NA	NA	NA	NA	NA	NA	NA	NA	NA
6	109639710	C	G	HDL	-0.0157	0.0017	7.1e-20	-0.0172	0.0019	1.334e-18	0.7903	not_sig	0.00814585	0.00321476	0.00909793	0.00294929	0.825539	not_sig	-0.00358762	0.00333542	0.00883818	0.00295435	0.00509366	not_sig	0.00044941	0.0010356	-0.0021795	0.0013322	0.149017	not_sig	-0.0029158	0.002092	-0.0017149	0.0018249	0.67645	not_sig
6	116327493	A	G	HDL	0.0166	0.0017	9.436e-24	0.0153	0.0019	3.599e-16	0.1984	not_sig	-0.00282134	0.00297939	0.000551625	0.00272856	0.399073	not_sig	-0.002038	0.00309084	0.00644011	0.00273322	0.03903	not_sig	-0.00013875	0.00096681	0.00094138	0.0012411	0.531991	not_sig	-0.0029033	0.0019529	-0.00021059	0.0017001	0.279818	not_sig
5	118729327	A	G	HDL	0.0082	0.0018	6.234e-06	0.0266	0.0021	1.738e-37	3.413e-10	sig	0.00852057	0.00332324	0.00980262	0.00303581	0.773583	not_sig	0.00126444	0.00344825	-0.0332514	0.00305075	5.07895e-14	sig	-9.0523e-05	0.0010748	-0.0010249	0.0013768	0.658056	not_sig	0.0012972	0.002168	-0.00022273	0.0018853	0.577983	not_sig
6	131931092	T	C	HDL	-0.0144	0.0021	5.237e-12	-0.0134	0.0024	1.76e-08	0.348	not_sig	0.0158676	0.00393253	0.012903	0.00361	0.574843	not_sig	-0.00122493	0.00407969	-0.00254838	0.0036159	0.807355	not_sig	-0.00067619	0.0012747	-0.0044838	0.0016402	0.143341	not_sig	0.00016288	0.0025749	0.0013718	0.0022469	0.695594	not_sig
6	135428537	A	C	HDL	-0.0147	0.0018	4.041e-17	-0.0074	0.002	0.0001997	4.307e-05	sig	0.00344068	0.00328512	-0.00640186	0.00301079	0.0256826	not_sig	0.00754578	0.00340806	0.00271535	0.00301568	0.286359	not_sig	0.0010042	0.001065	0.0023492	0.001368	0.647414	not_sig	-0.00086047	0.0021513	-0.0025751	0.0018739	0.498449	not_sig
6	137082948	A	G	HDL	-0.0143	0.0016	3.046e-18	-0.0115	0.0018	5.408e-10	0.0425	not_sig	-0.00335539	0.00301319	-0.00548768	0.00275998	0.598141	not_sig	-0.00328463	0.00312598	0.00208347	0.00276461	0.196347	not_sig	0.0026701	0.00097123	-0.0015638	0.0012473	0.00337558	not_sig	-0.0015525	0.0019619	-0.0023224	0.0017086	0.720302	not_sig
6	139261477	A	G	HDL	0.0154	0.0021	7.445e-14	0.0123	0.0023	1.297e-07	0.1503	not_sig	0.000930632	0.0039092	0.00341349	0.00359979	0.636989	not_sig	0.00338729	0.00405514	-0.00100262	0.00360574	0.416467	not_sig	0.0023692	0.0012676	-0.00086706	0.0016357	0.0765154	not_sig	0.0031912	0.0025605	-0.00088273	0.0022407	0.206365	not_sig
6	139835498	T	C	HDL	0.0159	0.0016	4.601e-23	0.0264	0.0018	3.392e-47	0.0001043	not_sig	0.00161242	0.00296267	0.00076806	0.00272489	0.832204	not_sig	-0.00694709	0.00307384	-0.0397329	0.00272952	1.14052e-15	sig	0.0007728	0.00096126	0.00037274	0.0012395	0.68835	not_sig	0.0017121	0.0019417	0.0006216	0.0016979	0.668764	not_sig
6	153462557	A	G	HDL	0.0121	0.0017	7.772e-13	0.0166	0.0019	5e-18	0.01651	not_sig	-0.0124029	0.00295957	-0.00277106	0.00271361	0.0153976	not_sig	-0.0037314	0.00307031	-0.0160004	0.0027181	0.00265402	not_sig	-0.00071013	0.0009602	-0.00051279	0.0012342	0.782943	not_sig	-0.001392	0.0019396	-0.0021264	0.0016907	0.731278	not_sig
6	161008646	A	G	HDL	0.054	0.003	1.201e-73	0.0616	0.0033	6.194e-78	0.2087	not_sig	0.000671245	0.00474259	-9.78119e-05	0.00436854	0.90411	not_sig	0.00130308	0.00492104	-0.0106967	0.00437605	0.0672134	not_sig	0.0008768	0.0015375	0.0022107	0.0019852	0.740743	not_sig	-0.0041152	0.0031056	0.0028174	0.0027195	0.0734648	not_sig
6	161588372	T	C	HDL	0.0261	0.005	1.888e-07	0.0352	0.0054	6.569e-11	0.4409	not_sig	0.013133	0.00828033	-0.00552099	0.00764132	0.0944796	not_sig	-0.00600975	0.00859093	-0.0054175	0.00765556	0.958771	not_sig	0.00079265	0.0025924	0.0022965	0.0033455	0.811673	not_sig	-0.0037499	0.0052367	0.0019215	0.0045827	0.386703	not_sig
6	163033350	A	G	HDL	0.0106	0.0026	5.874e-05	0.0157	0.003	1.624e-07	0.173	not_sig	-0.0275608	0.00445012	-0.017546	0.0040716	0.0935336	not_sig	0.000897479	0.00461629	-0.00432583	0.00407783	0.39435	not_sig	0.00098479	0.0014403	0.0010603	0.0018481	0.899525	not_sig	0.0052935	0.0029093	-0.0048209	0.0025316	0.00501978	not_sig
6	163745049	A	G	HDL	-0.0108	0.0016	3.507e-11	-0.0128	0.0019	1.128e-11	0.9807	not_sig	0.00184054	0.00293829	0.000707134	0.00270047	0.774217	not_sig	0.00400175	0.00304797	0.00667776	0.00270504	0.509541	not_sig	-0.0012389	0.0009559	0.00016672	0.0012317	0.284514	not_sig	-0.00043705	0.0019309	-0.0022554	0.0016872	0.430427	not_sig
7	1051664	T	C	HDL	-0.0151	0.0016	5.972e-21	-0.0196	0.0018	1.053e-26	0.8201	not_sig	-0.00189088	0.00296019	0.00195259	0.00271273	0.333615	not_sig	0.00314375	0.00306957	0.00516506	0.00272312	0.620762	not_sig	0.00089607	0.00095995	-0.00014036	0.0012329	0.43371	not_sig	-0.002829	0.0019383	0.0019701	0.0016885	0.0465465	not_sig
7	2296552	A	G	HDL	0.0911	0.016	1.266e-08	0.0911	0.018	4.32e-07	0.574	not_sig	0.0324194	0.0239157	-0.0103261	0.0216915	0.181158	not_sig	0.038417	0.0247885	-0.0538022	0.0217767	0.00499693	not_sig	-0.0027187	0.0077582	0.0050253	0.0098579	0.541061	not_sig	-0.0096774	0.015665	0.00037375	0.013501	0.611263	not_sig
7	6461310	T	C	HDL	-0.028	0.0019	2.357e-50	-0.0286	0.0021	5.271e-42	0.529	not_sig	-0.0053572	0.00334402	0.00461981	0.00306224	0.0262521	not_sig	-0.00120411	0.00346799	-0.00942044	0.00307389	0.0749448	not_sig	0.0014565	0.0010834	-0.00070407	0.0013903	0.173525	not_sig	0.0046411	0.0021875	-0.0012879	0.0019041	0.030939	not_sig
7	12267552	A	G	HDL	0.0119	0.0016	1.02e-13	0.0104	0.0018	1.28e-08	0.7407	not_sig	-0.00836863	0.00296831	-0.00761466	0.00271529	0.849855	not_sig	-0.00204338	0.00307787	-0.00319182	0.00272581	0.779044	not_sig	0.0014244	0.0009627	0.00010175	0.0012342	0.287885	not_sig	-0.0017789	0.0019439	-0.0037187	0.0016902	0.386778	not_sig
7	15903403	A	T	HDL	0.0074	0.0016	4.284e-06	0.01	0.0019	6.012e-08	0.3094	not_sig	-0.00354414	0.00303721	0.00436574	0.0027895	0.0526995	not_sig	-0.00259697	0.00314973	-0.00724885	0.0028005	0.267602	not_sig	0.00069725	0.00098476	0.00064593	0.0012676	0.851709	not_sig	-6.0822e-05	0.0019884	-0.0034576	0.001736	0.157056	not_sig
7	17287106	A	G	HDL	-0.0084	0.0017	6.854e-07	-0.0159	0.0019	2.063e-16	0.05324	not_sig	0.00760866	0.00304527	0.0119923	0.00278833	0.283564	not_sig	0.00293502	0.00315749	0.00792534	0.00279909	0.234879	not_sig	-0.00070862	0.00098719	-0.002682	0.0012667	0.36874	not_sig	-0.0028514	0.0019933	-0.0032426	0.0017348	0.824171	not_sig
7	17920613	T	C	HDL	0.0247	0.0016	3.788e-52	0.0261	0.0019	4.672e-45	0.6336	not_sig	-0.00255722	0.00299125	0.000697607	0.00274691	0.418223	not_sig	-0.00329926	0.00310184	-0.00715932	0.00275729	0.350202	not_sig	-0.00051158	0.00096952	-0.0028509	0.0012476	0.246135	not_sig	-0.0025835	0.0019577	-0.0035786	0.0017087	0.634382	not_sig
7	26397239	A	C	HDL	-0.0106	0.0017	1.754e-10	-0.0211	0.0019	4.309e-29	9.717e-05	not_sig	0.00797376	0.00293222	-0.00125583	0.00268883	0.019117	not_sig	0.00619641	0.00304069	0.0440808	0.00269918	8.06788e-21	sig	-0.0003188	0.00095455	0.0016448	0.0012267	0.243661	not_sig	0.00070979	0.0019274	0.00054787	0.00168	0.956727	not_sig
7	36192606	T	G	HDL	-0.0169	0.0016	8.241e-25	-0.0142	0.0019	3.202e-14	0.2592	not_sig	0.00387349	0.00298142	0.00200854	0.00274135	0.641866	not_sig	0.00219593	0.0030914	0.00519175	0.00275192	0.467208	not_sig	0.0012887	0.00095951	0.0010065	0.0012362	0.647047	not_sig	-0.0010276	0.0019375	0.0019695	0.001693	0.208512	not_sig
7	50308811	C	G	HDL	-0.015	0.0017	3.961e-18	-0.0209	0.002	1.885e-26	0.2127	not_sig	-0.00168405	0.00314936	-0.0055727	0.00288963	0.358121	not_sig	-0.00388058	0.00326567	0.00358922	0.0029008	0.085856	not_sig	0.00018379	0.0010216	0.001443	0.0013131	0.539904	not_sig	-0.0052201	0.0020627	0.0015917	0.0017983	0.00855009	not_sig
7	72330303	T	C	HDL	-0.0259	0.0062	2.721e-05	-0.0368	0.0066	2.391e-08	0.5986	not_sig	-0.013758	0.00915909	-0.0135532	0.00842111	0.986735	not_sig	0.0100594	0.00949527	0.0256447	0.00845416	0.218211	not_sig	0.0025432	0.0028975	-0.001661	0.0037196	0.333329	not_sig	0.0051152	0.0058507	-0.00042633	0.0050941	0.45419	not_sig
7	73037366	A	G	HDL	-0.0373	0.0021	2.805e-71	-0.0399	0.0024	1.296e-63	0.2777	not_sig	-0.0118029	0.00365191	-0.00705439	0.0033486	0.33304	not_sig	0.0116864	0.00378663	0.0356551	0.0033617	1.98977e-06	sig	0.00025458	0.0011819	-0.001107	0.0015185	0.509649	not_sig	-0.0024575	0.0023864	-0.0021388	0.0020797	0.945958	not_sig
7	74361240	T	C	HDL	0.0261	0.0041	1.487e-10	0.0254	0.0045	1.461e-08	0.9874	not_sig	-0.0107332	0.00641365	-0.0118572	0.00588995	0.896268	not_sig	0.01336	0.00664985	-0.00336369	0.00591118	0.0590359	not_sig	0.002746	0.0020576	0.0027045	0.0026478	0.755771	not_sig	0.0014124	0.0041547	0.0019874	0.0036263	0.897611	not_sig
7	80300449	T	G	HDL	0.0969	0.0105	2.258e-20	0.1954	0.014	4.84e-44	0.05715	not_sig	NA	NA	NA	NA	NA	NA	NA	NA	NA	NA	NA	NA	NA	NA	NA	NA	NA	NA	NA	NA	NA	NA	NA	NA
7	80851648	C	G	HDL	-0.0848	0.0141	1.993e-09	-0.1209	0.0194	4.679e-10	0.2136	not_sig	NA	NA	NA	NA	NA	NA	NA	NA	NA	NA	NA	NA	NA	NA	NA	NA	NA	NA	NA	NA	NA	NA	NA	NA
7	94953895	A	G	HDL	0.0059	0.0016	0.0003315	0.0119	0.0018	1.053e-10	0.001088	not_sig	0.00107554	0.00299854	-0.00365699	0.00274366	0.239554	not_sig	0.00199895	0.00310933	0.000607985	0.00275415	0.736606	not_sig	0.00014497	0.00096107	-0.0016573	0.0012321	0.303315	not_sig	-0.0019923	0.0019406	0.00016878	0.0016874	0.378554	not_sig
7	101886704	A	G	HDL	0.0093	0.0017	7.638e-08	0.0082	0.0019	1.935e-05	0.9163	not_sig	-0.00250631	0.00299687	-0.00614207	0.00275006	0.366603	not_sig	-0.00644212	0.00310755	-0.010988	0.00276068	0.272007	not_sig	0.00031185	0.00096807	0.00277	0.001245	0.202898	not_sig	-0.0048867	0.0019547	-0.0024678	0.001705	0.357249	not_sig
7	106801395	C	G	HDL	0.0115	0.0021	5.798e-08	0.0182	0.0024	3.299e-14	0.313	not_sig	-0.00224034	0.00362959	0.00619453	0.00333375	0.0838565	not_sig	-0.00138406	0.00376374	0.00251761	0.00334659	0.436503	not_sig	0.0020523	0.0011768	-0.0013613	0.0015155	0.0537443	not_sig	-0.004123	0.0023763	0.00038596	0.0020755	0.134146	not_sig
7	116982907	A	G	HDL	0.0113	0.0017	9.964e-12	0.0122	0.0019	8.033e-11	0.6021	not_sig	-0.00686782	0.00307452	-0.0065475	0.00281684	0.938153	not_sig	-0.0128025	0.00318806	-0.0202726	0.00282771	0.0782897	not_sig	-1.8276e-05	0.00099709	0.00045257	0.0012802	0.799029	not_sig	-0.0029004	0.0020133	-0.0043802	0.0017532	0.503535	not_sig
5	118729327	A	G	logTG	-0.0111	0.0018	7.691e-10	-0.0289	0.0021	4.877e-45	3.218e-10	sig	0.00852057	0.00332324	0.00980262	0.00303581	0.773583	not_sig	0.00126444	0.00344825	-0.0332514	0.00305075	5.07895e-14	sig	-9.0523e-05	0.0010748	-0.0010249	0.0013768	0.658056	not_sig	0.0012972	0.002168	-0.00022273	0.0018853	0.577983	not_sig
7	137561861	A	G	HDL	-0.0537	0.0085	3.041e-10	-0.0469	0.0109	1.545e-05	0.5654	not_sig	-0.0213321	0.0617237	0.0628531	0.0590664	0.319572	not_sig	0.0204465	0.064017	0.00828923	0.0592984	0.888709	not_sig	NA	NA	NA	NA	NA	NA	NA	NA	NA	NA	NA	NA
7	139036598	T	G	HDL	-0.0104	0.0019	5.782e-08	-0.0124	0.0022	1.597e-08	0.9874	not_sig	-0.000226516	0.00346852	-0.00408396	0.00318475	0.407996	not_sig	0.0120155	0.00359663	0.00932882	0.00319746	0.574973	not_sig	-0.0028784	0.0011244	-0.0021608	0.0014466	0.360509	not_sig	0.0031281	0.0022704	0.003423	0.0019811	0.869107	not_sig
7	150537635	A	G	HDL	0.0151	0.0017	3.53e-19	0.017	0.0019	1.04e-18	0.3653	not_sig	0.00179012	0.0032197	-0.00275897	0.00295092	0.29277	not_sig	0.00744902	0.00333887	-0.01197	0.00296211	1.24304e-05	sig	0.0016929	0.0010376	-0.00099198	0.0013329	0.0819183	not_sig	-0.00091711	0.0020952	-0.002066	0.0018255	0.636619	not_sig
8	6620392	A	G	HDL	-0.01	0.002	3.036e-07	-0.0138	0.0022	2.618e-10	0.02341	not_sig	0.00335126	0.00341163	0.00196335	0.00312613	0.761925	not_sig	-0.00843797	0.00353687	0.00330611	0.00313988	0.0126275	not_sig	0.00086868	0.0010956	-0.00024669	0.0014082	0.472594	not_sig	-0.0014529	0.0022102	0.00037161	0.0019265	0.511607	not_sig
8	9183596	A	G	HDL	0.0971	0.0028	3.67e-271	0.096	0.0032	4.66e-196	0.5908	not_sig	0.000144002	0.00510205	-0.00154781	0.00466303	0.804733	not_sig	0.00378021	0.00528842	-0.016214	0.00468276	0.00446838	not_sig	-0.001131	0.0016783	0.0040466	0.0021515	0.0735497	not_sig	-0.0085958	0.0033858	0.0010893	0.0029435	0.0234418	not_sig
8	9788582	A	G	HDL	0.0133	0.0019	1.112e-12	0.0137	0.0021	1.647e-10	0.9884	not_sig	0.00394997	0.00356584	0.00593188	0.00326507	0.678844	not_sig	-0.0153069	0.00369674	-0.00669584	0.00327904	0.0800656	not_sig	0.00016331	0.0011534	0.00016899	0.0014822	0.976646	not_sig	0.0014482	0.002327	0.0040172	0.0020278	0.347054	not_sig
8	10643164	T	C	HDL	0.0175	0.0021	4.815e-17	0.0192	0.0024	9.504e-16	0.6893	not_sig	NA	NA	NA	NA	NA	NA	NA	NA	NA	NA	NA	NA	-0.0018322	0.0011937	-0.0026767	0.0015369	0.976521	not_sig	0.0057443	0.0024082	0.0017125	0.0021026	0.198304	not_sig
8	11854888	T	G	HDL	-0.0044	0.0017	0.01033	0.0009	0.002	0.643	0.5527	not_sig	0.0164725	0.00294168	0.0173648	0.00270693	0.821627	not_sig	-0.0240694	0.00304941	-0.0126716	0.00271896	0.00507699	not_sig	0.0005829	0.00094968	0.00087823	0.0012263	0.978775	not_sig	0.0060554	0.0019159	0.0033122	0.0016776	0.292703	not_sig
8	12617942	A	T	HDL	0.0116	0.0019	1.342e-09	0.0093	0.0022	1.929e-05	0.2732	not_sig	NA	NA	NA	NA	NA	NA	NA	NA	NA	NA	NA	NA	-0.00070747	0.0010456	-0.0002779	0.0013411	0.710999	not_sig	0.0017901	0.0021094	0.0045318	0.0018347	0.265784	not_sig
8	17800472	T	C	HDL	0.0092	0.0016	2.139e-08	0.0107	0.0019	1.228e-08	0.8949	not_sig	-0.00291269	0.00302398	0.00225919	0.00277341	0.202975	not_sig	-0.00271132	0.00313487	-0.00975664	0.00278544	0.0915185	not_sig	0.00019176	0.00097725	0.00061591	0.0012575	0.852582	not_sig	-0.0010427	0.0019715	-0.005157	0.0017204	0.080212	not_sig
8	19251679	T	C	HDL	0.0799	0.0112	8.956e-13	0.076	0.012	2.577e-10	0.7096	not_sig	0.014489	0.0186165	-0.0107851	0.0175604	0.318506	not_sig	-0.0139461	0.0193097	0.00300761	0.0176357	0.514939	not_sig	NA	NA	NA	NA	NA	NA	NA	NA	NA	NA	NA	NA
8	19823648	A	T	HDL	0.114	0.0017	4.47e-929	0.1014	0.002	1.36e-554	5.537e-14	sig	-0.00490763	0.00323856	-0.00493154	0.00297276	0.995617	not_sig	-0.0133102	0.00335741	-0.0106937	0.002986	0.558614	not_sig	0.00061585	0.0010485	0.0016947	0.0013504	0.679699	not_sig	-0.0043985	0.0021153	-0.00096184	0.0018475	0.208417	not_sig
8	20485546	A	G	HDL	0.0526	0.0232	0.02362	0.1779	0.0342	1.955e-07	0.2079	not_sig	NA	NA	NA	NA	NA	NA	NA	NA	NA	NA	NA	NA	NA	NA	NA	NA	NA	NA	NA	NA	NA	NA	NA	NA
8	25464670	T	G	HDL	0.0163	0.0021	2.46e-14	0.0098	0.0024	4.901e-05	0.1131	not_sig	NA	NA	NA	NA	NA	NA	NA	NA	NA	NA	NA	NA	-0.0010561	0.0010856	-0.00097286	0.0014004	0.795414	not_sig	-6.5993e-05	0.0021901	0.0013266	0.0019159	0.599926	not_sig
8	34519519	A	G	HDL	-0.0092	0.0018	1.981e-07	-0.0103	0.002	3.647e-07	0.4771	not_sig	0.0122293	0.0033269	0.00905564	0.00305246	0.477722	not_sig	0.00283071	0.00344883	0.00120035	0.00306581	0.722686	not_sig	-0.0014727	0.0010762	0.0014506	0.001385	0.0805952	not_sig	-0.00013952	0.0021711	-0.0011665	0.0018948	0.693428	not_sig
8	36848357	T	C	HDL	-0.0075	0.002	0.0001171	-0.0172	0.0023	2.957e-14	0.004088	not_sig	0.00786094	0.00392038	-0.0077295	0.00359836	0.00308438	not_sig	-0.0177643	0.00406395	-0.00262281	0.00361443	0.00516913	not_sig	-0.00076263	0.00127	0.00077645	0.0016355	0.437136	not_sig	-0.0024197	0.0025621	0.0033952	0.0022375	0.0659434	not_sig
8	38328902	A	G	HDL	0.0087	0.0016	1.17e-07	0.0117	0.0019	4.495e-10	0.3135	not_sig	-0.00963665	0.00298602	-0.0114588	0.0027426	0.64987	not_sig	-0.0011077	0.00309543	-0.0146234	0.00275472	0.00105232	not_sig	0.00083554	0.00096553	0.0020446	0.0012442	0.639437	not_sig	-0.0051831	0.0019479	-0.0054942	0.0017022	0.808275	not_sig
8	60654261	A	G	HDL	0.0107	0.0019	2.901e-08	0.0101	0.0022	5.276e-06	0.6835	not_sig	-0.00778438	0.00330201	-0.0141301	0.00303997	0.153275	not_sig	0.00143821	0.0034231	-0.00112635	0.00305333	0.574413	not_sig	-0.00011206	0.0010678	-0.0016152	0.0013795	0.470895	not_sig	0.0011054	0.0021543	-0.0010368	0.0018872	0.423482	not_sig
8	64799004	T	G	HDL	0.0105	0.0016	1.437e-10	0.0106	0.0019	1.19e-08	0.6729	not_sig	-0.00523743	0.00293514	-0.0186854	0.00268937	0.000644747	not_sig	-0.00148074	0.00304289	-0.00163111	0.00270121	0.97039	not_sig	0.0010042	0.00094964	-5.0641e-05	0.0012209	0.408287	not_sig	0.0039392	0.0019158	0.0043247	0.0016702	0.800931	not_sig
8	71196058	A	C	HDL	0.027	0.0024	1.989e-28	0.0223	0.0027	2.65e-16	0.1347	not_sig	0.00162822	0.00489658	-0.00804	0.0044864	0.141441	not_sig	0.00364944	0.00507577	0.00187681	0.00450537	0.793061	not_sig	-0.00062582	0.0015865	0.0019182	0.0020382	0.347649	not_sig	-0.0048826	0.0032006	0.0014247	0.0027885	0.116652	not_sig
8	72459582	A	G	HDL	-0.0181	0.003	1.848e-09	-0.0243	0.0034	6.375e-13	0.2552	not_sig	-0.00379564	0.00544959	-0.00377247	0.00499105	0.997473	not_sig	0.0284211	0.00564838	0.0549258	0.00501387	0.000423812	not_sig	-0.00050958	0.0017622	0.0038035	0.0022649	0.172964	not_sig	-0.00037836	0.003555	-0.0021439	0.0030986	0.677596	not_sig
8	103876183	A	G	HDL	-0.0134	0.0021	8.349e-11	-0.0127	0.0023	5.705e-08	0.935	not_sig	0.0044203	0.00379414	-0.000100777	0.00347704	0.374904	not_sig	0.0078035	0.00393342	0.0115745	0.00349185	0.471451	not_sig	0.00094309	0.0012286	-0.0035642	0.001579	0.0341827	not_sig	-0.0075156	0.0024785	0.0024795	0.0021603	0.00130973	not_sig
8	106385695	A	C	HDL	0.0102	0.0016	1.731e-10	0.0103	0.0018	1.842e-08	0.6763	not_sig	-0.00756219	0.0029344	-0.00746333	0.00269264	0.979997	not_sig	-0.00487764	0.00304194	-0.00158765	0.0027043	0.416862	not_sig	0.0018465	0.00094938	0.0025028	0.0012219	0.943069	not_sig	-0.00053522	0.0019153	-0.0043847	0.0016717	0.0939009	not_sig
8	116597635	T	C	HDL	0.0273	0.0017	1.532e-60	0.0399	0.0019	7.02e-99	6.489e-05	sig	-0.0127799	0.00295409	-0.00906199	0.00271175	0.349028	not_sig	0.000984377	0.00306232	-0.00577202	0.0027237	0.0977525	not_sig	-0.00080133	0.00095648	0.00069112	0.0012316	0.310071	not_sig	0.0034319	0.0019296	0.0026329	0.0016849	0.788117	not_sig
8	121872464	A	C	HDL	-0.0172	0.0017	4.139e-24	-0.0236	0.0019	3.882e-34	0.04427	not_sig	-0.00130519	0.00314249	-0.00479632	0.00288017	0.408108	not_sig	-0.00237282	0.00325766	-0.00191678	0.00289292	0.916268	not_sig	-0.00072862	0.0010206	-0.00038641	0.0013124	0.735024	not_sig	-0.0025572	0.0020589	-0.0012053	0.0017955	0.622687	not_sig
8	126507308	T	C	HDL	0.043	0.0018	1.57e-130	0.0378	0.002	1.638e-78	0.02302	not_sig	0.0112343	0.00318708	0.00970656	0.00292809	0.721434	not_sig	0.00297115	0.0033041	-0.0235078	0.00294097	1.82631e-09	sig	-0.00018082	0.0010321	0.0013968	0.0013307	0.396075	not_sig	0.0021092	0.0020823	0.0013548	0.0018206	0.796741	not_sig
8	144296480	C	G	HDL	-0.0225	0.002	1.315e-29	-0.0308	0.0023	2.169e-40	0.0992	not_sig	0.00748123	0.00375583	0.00567185	0.00345942	0.720411	not_sig	0.00278545	0.00389316	-0.00117124	0.00347457	0.446299	not_sig	0.0010957	0.0012155	0.00080498	0.0015712	0.742197	not_sig	0.0051749	0.0024522	-0.0014291	0.0021496	0.0325849	not_sig
9	1038666	T	C	HDL	0.0134	0.0018	4.604e-13	0.01	0.0021	1.575e-06	0.3429	not_sig	0.00844048	0.00348758	0.00529446	0.00319679	0.501801	not_sig	0.0053365	0.0036156	3.97622e-05	0.00321303	0.27138	not_sig	-0.00027877	0.0011299	0.00090401	0.0014514	0.541401	not_sig	-0.0013257	0.0022774	0.00023265	0.0019858	0.587534	not_sig
9	5073770	T	G	HDL	0.3976	0.053	6.339e-14	0.2146	0.0974	0.02759	0.03226	not_sig	NA	NA	NA	NA	NA	NA	NA	NA	NA	NA	NA	NA	NA	NA	NA	NA	NA	NA	NA	NA	NA	NA	NA	NA
9	13452771	A	G	HDL	0.0083	0.0017	8.937e-07	0.009	0.0019	3.116e-06	0.6075	not_sig	-0.0019256	0.00309215	0.00309041	0.00283264	0.226982	not_sig	-0.00409951	0.00320506	-0.0101268	0.00284663	0.157876	not_sig	0.00019343	0.00099666	0.0012757	0.0012796	0.594542	not_sig	0.0021396	0.0020088	-0.000949	0.0017507	0.219007	not_sig
9	14068327	A	C	HDL	0.013	0.0022	3.708e-09	0.0126	0.0025	4.737e-07	0.8863	not_sig	0.00247583	0.0037055	-0.00493751	0.00340131	0.136572	not_sig	-0.00295243	0.00384159	-0.00360961	0.00341841	0.897862	not_sig	2.8717e-05	0.001196	0.0011351	0.0015398	0.62791	not_sig	-0.0026225	0.0024106	-0.0065099	0.0021067	0.167837	not_sig
9	15304782	A	C	HDL	-0.0435	0.0024	1.786e-71	-0.0561	0.0028	1.25e-91	0.006241	not_sig	0.00527551	0.00420419	0.00447606	0.00386194	0.887517	not_sig	0.00221681	0.0043579	0.00281528	0.00388074	0.917953	not_sig	0.00034337	0.0013616	0.0013826	0.0017525	0.728108	not_sig	0.00087152	0.0027443	0.002052	0.0023977	0.712076	not_sig
9	16901067	A	C	HDL	-0.0084	0.0016	3.444e-07	-0.0096	0.0019	3.645e-07	0.9201	not_sig	-0.00100984	0.00309809	-0.00171019	0.00283951	0.866327	not_sig	0.00199745	0.0032118	-0.00664248	0.00285374	0.0434019	not_sig	7.6046e-05	0.0010002	-0.0021722	0.0012853	0.226688	not_sig	-0.0011678	0.002016	-0.0016735	0.0017585	0.816722	not_sig
9	19254604	A	G	HDL	-0.0162	0.0032	4.652e-07	-0.0195	0.0035	2.475e-08	0.4966	not_sig	0.00199271	0.00549615	0.00277843	0.00502573	0.915137	not_sig	-0.00355265	0.00569775	0.00143171	0.00505125	0.510871	not_sig	-0.00019693	0.0017781	0.0014748	0.0022811	0.600397	not_sig	-0.0028832	0.0035839	0.0039862	0.0031209	0.120028	not_sig
9	28410683	T	C	HDL	-0.0112	0.0018	1.764e-10	-0.013	0.002	5.398e-11	0.2452	not_sig	0.0248715	0.00312337	0.0236888	0.00287051	0.778247	not_sig	0.00338437	0.00323808	0.000162711	0.00288503	0.455588	not_sig	-0.0011639	0.0010112	-0.00070991	0.0013029	0.619431	not_sig	-0.0011688	0.0020382	-0.00046031	0.0017825	0.792056	not_sig
9	32523737	T	C	HDL	0.0098	0.0017	6.789e-09	0.0103	0.0019	5.131e-08	0.9971	not_sig	-0.00436404	0.00299797	-0.000916783	0.00275621	0.39255	not_sig	0.000982107	0.00310792	0.000219832	0.00277018	0.85409	not_sig	-0.00011481	0.00097001	0.00070397	0.0012498	0.635753	not_sig	0.00076823	0.0019551	-0.00045733	0.0017099	0.61563	not_sig
9	33128429	A	G	HDL	-0.0099	0.0016	4.506e-10	-0.0091	0.0018	5.233e-07	0.395	not_sig	-0.00563996	0.00293292	0.00176707	0.00269256	0.0602322	not_sig	-0.00367455	0.00304049	0.00369855	0.00270617	0.06885	not_sig	-0.00061788	0.00094956	0.0011971	0.0012219	0.246346	not_sig	-0.00039342	0.0019139	0.00028787	0.0016717	0.77488	not_sig
9	34175780	T	C	HDL	-0.0104	0.0017	1.124e-09	-0.0082	0.0019	2.377e-05	0.3193	not_sig	0.00628866	0.00293551	0.00673703	0.00269429	0.909508	not_sig	0.000227251	0.00304322	-0.0036228	0.00270789	0.342466	not_sig	-0.0012307	0.0009515	-0.00015313	0.0012243	0.372808	not_sig	0.0031247	0.0019178	-0.0024815	0.0016751	0.0187193	not_sig
9	88940359	T	C	HDL	-0.065	0.0118	3.877e-08	-0.0637	0.0136	2.977e-06	0.7135	not_sig	-0.0134577	0.0194561	0.0200934	0.017996	0.201009	not_sig	0.010402	0.0201741	0.0754904	0.0180782	0.0158056	not_sig	0.0049783	0.0063117	-0.0037912	0.0081672	0.36205	not_sig	0.0072517	0.012722	0.0035654	0.011174	0.829358	not_sig
9	93944244	T	C	HDL	-0.0059	0.0021	0.004398	-0.0095	0.0024	5.178e-05	0.4838	not_sig	-0.00064168	0.00377776	-0.00415304	0.00346635	0.489095	not_sig	0.0124056	0.00391559	0.0143511	0.00348357	0.709258	not_sig	0.0020487	0.001219	0.0020072	0.0015688	0.691913	not_sig	-0.0038278	0.0024569	-0.0022442	0.0021463	0.639388	not_sig
9	100784050	A	C	HDL	0.0087	0.0019	2.368e-06	0.0087	0.0021	2.715e-05	0.8356	not_sig	-0.0034321	0.00323532	-0.00220523	0.00295755	0.777406	not_sig	-0.00336697	0.00335414	-0.00496839	0.00297244	0.719669	not_sig	0.0036057	0.0010463	0.0012566	0.0013409	0.0489705	not_sig	0.0015147	0.002109	0.00094174	0.0018346	0.845151	not_sig
9	102247368	A	G	HDL	-0.0088	0.0017	2.239e-07	-0.0046	0.0019	0.0181	0.1089	not_sig	0.0046979	0.00303577	-0.000231339	0.00278812	0.227083	not_sig	0.00424569	0.00314733	0.00221175	0.00280215	0.627822	not_sig	0.00016795	0.00098368	-0.0015326	0.0012665	0.33996	not_sig	0.0013737	0.0019827	0.0014453	0.0017327	0.953228	not_sig
9	105805994	T	G	HDL	-0.5098	0.0802	2.07e-10	-0.4455	0.0755	3.677e-09	0.7237	not_sig	-0.10125	0.124816	0.0876246	0.123641	0.27752	not_sig	0.031286	0.129423	-0.0857484	0.124272	0.512361	not_sig	NA	NA	NA	NA	NA	NA	NA	NA	NA	NA	NA	NA
9	107093784	T	G	HDL	0.3366	0.0268	3.243e-36	0.3404	0.0274	1.686e-35	0.7877	not_sig	-0.0185403	0.0511405	-0.0132665	0.0442769	0.937238	not_sig	-0.0314924	0.0530281	0.0472916	0.0445518	0.253245	not_sig	NA	NA	NA	NA	NA	NA	NA	NA	NA	NA	NA	NA
9	107661742	A	C	HDL	-0.0615	0.0018	1.4e-257	-0.0775	0.002	1.21e-315	0.001936	not_sig	0.00217874	0.00332434	0.00845474	0.00305116	0.160066	not_sig	-0.00990535	0.0034464	-0.0176624	0.00306639	0.0912271	not_sig	0.0010822	0.0010757	-0.00092902	0.0013842	0.223547	not_sig	-0.00039908	0.0021682	0.00040515	0.0018937	0.764734	not_sig
9	109062494	A	C	HDL	0.2646	0.0485	4.865e-08	0.3479	0.0467	9.472e-14	0.3101	not_sig	-0.0785115	0.140472	-0.0983432	0.126967	0.915751	not_sig	0.14734	0.145657	0.0409911	0.127615	0.581228	not_sig	NA	NA	NA	NA	NA	NA	NA	NA	NA	NA	NA	NA
9	110112471	C	G	HDL	0.1544	0.0402	0.0001205	0.1756	0.0373	2.564e-06	0.3061	not_sig	-0.00308645	0.0660004	-0.0190793	0.0559992	0.851968	not_sig	0.0165175	0.0682695	-0.0258326	0.0562849	0.63071	not_sig	NA	NA	NA	NA	NA	NA	NA	NA	NA	NA	NA	NA
9	112556911	T	C	HDL	0.0108	0.0021	2.998e-07	0.0133	0.0023	1.404e-08	0.4946	not_sig	-0.00340842	0.00355761	-0.00113315	0.00325648	0.633721	not_sig	0.000140391	0.00368797	-0.0182346	0.00327271	0.000181765	not_sig	0.000539	0.0011414	0.0017746	0.0014643	0.639801	not_sig	-0.00028893	0.0023006	-0.0015637	0.0020034	0.642411	not_sig
9	113830547	T	C	HDL	-0.011	0.0017	1.249e-10	-0.0077	0.0019	4.927e-05	0.2401	not_sig	-0.00481666	0.00312955	-0.00155829	0.00286873	0.438213	not_sig	-0.0044942	0.00324447	-0.0111654	0.00288296	0.12263	not_sig	0.00097601	0.0010103	-1.8038e-05	0.0012977	0.459673	not_sig	0.001033	0.0020363	0.0018029	0.0017754	0.738237	not_sig
9	117148430	T	G	HDL	-0.0101	0.0016	3.363e-10	-0.0127	0.0018	3.125e-12	0.3849	not_sig	0.00156464	0.00296841	0.0046538	0.00272956	0.439081	not_sig	0.00508588	0.00307741	-0.000401762	0.00274331	0.181231	not_sig	0.0011363	0.00095516	-0.0011384	0.0012308	0.126334	not_sig	0.00092788	0.0019252	0.00069859	0.0016839	0.937453	not_sig
9	123480600	A	C	HDL	0.0086	0.0017	4.689e-07	0.0119	0.002	1.161e-09	0.3446	not_sig	0.00285189	0.00318619	-0.00590275	0.00292019	0.0407584	not_sig	-0.0028928	0.00330315	-0.00445464	0.00293506	0.722577	not_sig	0.00057121	0.0010327	0.0014831	0.001327	0.731122	not_sig	-0.0028589	0.0020816	-0.0040432	0.0018155	0.597383	not_sig
9	126539944	A	G	HDL	-0.0091	0.0028	0.00105	-0.0215	0.0033	7.32e-11	0.003882	not_sig	0.00971227	0.00612088	0.0192401	0.00565053	0.247983	not_sig	0.0120137	0.00634528	0.0152998	0.00568017	0.698337	not_sig	0.0014777	0.0019801	0.001744	0.0025635	0.92318	not_sig	0.0025719	0.0039911	-0.0010595	0.0035072	0.469013	not_sig
9	131561110	A	G	HDL	0.0088	0.0019	2.492e-06	0.0108	0.0021	4.917e-07	0.4811	not_sig	7.64797e-05	0.00342766	0.00544724	0.00313015	0.242541	not_sig	-0.00752227	0.00355358	-0.0142852	0.00314642	0.152386	not_sig	-0.00077241	0.0011124	-0.00015633	0.0014239	0.652132	not_sig	0.000105	0.0022421	0.00049289	0.0019481	0.884366	not_sig
9	132214501	C	G	HDL	-0.0077	0.0017	6.475e-06	-0.0109	0.002	2.838e-08	0.321	not_sig	0.0048562	0.00298693	0.00488384	0.00273746	0.994502	not_sig	0.00450309	0.00309637	-0.00142751	0.00275118	0.150398	not_sig	-0.00063581	0.00095814	-0.0024069	0.0012311	0.406148	not_sig	0.00080123	0.0019312	-0.00057712	0.0016843	0.566168	not_sig
9	136141870	T	C	HDL	-0.0069	0.002	0.0006965	-0.0249	0.0023	1.78e-27	2.861e-07	sig	-0.00203677	0.00376957	-0.00860328	0.00346187	0.195005	not_sig	-0.012995	0.00390785	0.00534431	0.00347847	0.00043013	not_sig	-0.00066092	0.0012212	-0.0017523	0.0015723	0.725085	not_sig	0.0047514	0.0024615	-0.0014205	0.0021512	0.0461565	not_sig
9	137268682	T	C	HDL	0.0078	0.0019	3.388e-05	0.011	0.0021	2.958e-07	0.9579	not_sig	-0.00545752	0.00339985	0.00316578	0.00311925	0.0590605	not_sig	0.00678056	0.00352479	-0.00783821	0.00313505	0.00185406	not_sig	0.0013328	0.0010941	-0.0031352	0.0014074	0.0147499	not_sig	-0.003046	0.0022053	0.0010049	0.0019255	0.143535	not_sig
9	139973820	T	C	HDL	-0.0063	0.0017	0.000145	-0.0133	0.0019	6.067e-12	0.004893	not_sig	-0.00208495	0.00301362	-0.00221405	0.00277237	0.974596	not_sig	0.00251378	0.0031244	0.00509692	0.00278623	0.535407	not_sig	NA	NA	NA	NA	NA	NA	NA	NA	NA	NA	NA	NA
1	209849714	T	TA	HDL	0.0163	0.0031	9.806e-08	0.017	0.0035	1.075e-06	0.7651	not_sig	-0.00832111	0.00658563	-0.00595794	0.00602516	0.789151	not_sig	-0.000884433	0.00684613	-0.0285873	0.00604827	0.00231961	not_sig	NA	NA	NA	NA	NA	NA	NA	NA	NA	NA	NA	NA
1	230796872	CAT	C	HDL	-0.0254	0.0047	6.611e-08	-0.0251	0.0056	6.991e-06	0.4967	not_sig	0.0162752	0.00768861	0.0108293	0.00706053	0.598229	not_sig	0.0174875	0.00798972	0.0207154	0.00708813	0.761469	not_sig	NA	NA	NA	NA	NA	NA	NA	NA	NA	NA	NA	NA
12	67689927	T	TA	HDL	-0.0082	0.0017	1.156e-06	-0.0115	0.002	1.296e-08	0.253	not_sig	-0.00463386	0.00298891	0.00532412	0.00274281	0.0131606	not_sig	-0.00415601	0.00309858	0.0082303	0.00274906	0.00266975	not_sig	NA	NA	NA	NA	NA	NA	NA	NA	NA	NA	NA	NA
12	69868820	CAT	C	HDL	-0.011	0.0018	6.742e-10	-0.0116	0.0021	3.9e-08	0.6887	not_sig	0.0016396	0.00311686	0.00265255	0.00286068	0.808905	not_sig	0.000661575	0.00323138	0.00379946	0.00286757	0.465683	not_sig	NA	NA	NA	NA	NA	NA	NA	NA	NA	NA	NA	NA
13	108960380	T	TGCTG	HDL	0.0363	0.0066	4.602e-08	0.0554	0.0084	5.143e-11	0.5425	not_sig	0.000776901	0.0120346	0.00243228	0.0108989	0.91798	not_sig	-0.00983839	0.0124726	-0.00991884	0.0109588	0.996117	not_sig	NA	NA	NA	NA	NA	NA	NA	NA	NA	NA	NA	NA
15	50993673	T	TAAAA	HDL	0.0124	0.0021	7.316e-09	0.0108	0.0025	1.787e-05	0.5164	not_sig	-0.0113271	0.0037036	0.00027985	0.0034115	0.0198982	not_sig	-0.00344587	0.00383495	0.00323696	0.00342808	0.191913	not_sig	NA	NA	NA	NA	NA	NA	NA	NA	NA	NA	NA	NA
16	56393734	CCT	C	HDL	-0.2264	0.0141	9.672e-58	-0.2234	0.0139	9.054e-58	0.5065	not_sig	-0.0272176	0.0196627	0.0187268	0.0179044	0.0809777	not_sig	-0.0210656	0.020423	-0.00876415	0.0180124	0.650023	not_sig	NA	NA	NA	NA	NA	NA	NA	NA	NA	NA	NA	NA
17	41166479	T	TTC	HDL	0.1025	0.0097	5.92e-26	0.0894	0.0107	6.2e-17	0.4751	not_sig	0.016446	0.0133767	0.00315466	0.0122818	0.459745	not_sig	-0.0190591	0.0138408	-0.0314843	0.0123225	0.500658	not_sig	NA	NA	NA	NA	NA	NA	NA	NA	NA	NA	NA	NA
4	55530748	A	ATTATTTAT	HDL	-0.0098	0.0017	1.638e-08	-0.0112	0.0021	7.856e-08	0.2195	not_sig	NA	NA	NA	NA	NA	NA	NA	NA	NA	NA	NA	NA	NA	NA	NA	NA	NA	NA	NA	NA	NA	NA	NA	NA
6	98566506	CT	C	HDL	0.0108	0.0017	1.77e-10	0.0114	0.002	1.485e-08	0.8258	not_sig	-0.015337	0.00292754	-0.0130292	0.00268617	0.557414	not_sig	-0.00745005	0.00303698	-0.0013323	0.00269062	0.129913	not_sig	NA	NA	NA	NA	NA	NA	NA	NA	NA	NA	NA	NA
7	35671204	CATATATAAATATATATAA	C	HDL	-0.0091	0.0018	6.797e-07	-0.0109	0.0022	1.009e-06	0.9257	not_sig	0.00362251	0.0030753	-0.000417043	0.00282335	0.328403	not_sig	-0.000948451	0.00318891	-0.000762966	0.00283417	0.965169	not_sig	NA	NA	NA	NA	NA	NA	NA	NA	NA	NA	NA	NA
7	38265179	CTTGAAAAGACAACCTTTCCCCATTGTACTGAT	C	HDL	0.0163	0.0017	4.83e-22	0.0133	0.002	3.025e-11	0.1895	not_sig	NA	NA	NA	NA	NA	NA	NA	NA	NA	NA	NA	NA	NA	NA	NA	NA	NA	NA	NA	NA	NA	NA	NA	NA
9	106532723	T	TA	HDL	-0.0689	0.0127	6.424e-08	-0.0807	0.0154	1.53e-07	0.1908	not_sig	0.0418126	0.019514	0.00631172	0.0180998	0.1779	not_sig	-0.00963985	0.0202173	-0.00889235	0.0181922	0.977977	not_sig	NA	NA	NA	NA	NA	NA	NA	NA	NA	NA	NA	NA
1	2326009	A	G	LDL	0.0083	0.0017	7.732e-07	0.0134	0.0019	3.145e-12	0.01569	not_sig	-0.000405649	0.00293746	0.00118583	0.00269396	0.686722	not_sig	0.00205593	0.00305362	-0.001063	0.00270416	0.442469	not_sig	-0.0013452	0.00095484	4.8948e-05	0.0012286	0.275366	not_sig	-0.00022837	0.0019338	0.0019	0.0016838	0.36438	not_sig
1	15914648	A	G	LDL	-0.0094	0.0018	1.175e-07	-0.0114	0.002	1.435e-08	0.3377	not_sig	0.00969998	0.00315118	0.011803	0.00288887	0.619273	not_sig	0.00193653	0.00327573	0.00346155	0.00289963	0.726237	not_sig	0.00069997	0.0010246	0.00068179	0.0013178	0.870368	not_sig	0.0011087	0.0020752	0.0013948	0.001806	0.891429	not_sig
1	16510894	T	C	LDL	-0.0132	0.0017	9.442e-15	-0.0149	0.0019	1.523e-14	0.5547	not_sig	-0.000663052	0.00294871	0.0071888	0.00271178	0.0477381	not_sig	0.0029011	0.00306487	-0.00775929	0.00272213	0.00899928	not_sig	-0.00027589	0.00096093	-6.9369e-06	0.0012401	0.831599	not_sig	0.001943	0.0019462	0.0013971	0.0016995	0.848816	not_sig
1	18808526	A	C	LDL	-0.0101	0.0017	2.926e-09	-0.011	0.002	1.971e-08	0.2648	not_sig	-0.0012441	0.00301318	-0.00375766	0.00276495	0.534723	not_sig	-0.00280504	0.00313195	0.00114092	0.00277544	0.343589	not_sig	0.0004106	0.0009872	-0.0028396	0.0012715	0.0661467	not_sig	0.0017009	0.0019994	-0.0028784	0.0017425	0.0626588	not_sig
1	23784965	A	G	LDL	0.0131	0.0022	5.012e-09	0.0184	0.0026	1.089e-12	0.6023	not_sig	-0.00652066	0.00440474	-0.000265661	0.0040326	0.290086	not_sig	0.000751484	0.00457878	-0.00455714	0.00404786	0.382957	not_sig	-0.00069698	0.0014356	-0.00036523	0.0018437	0.8166	not_sig	-0.0025582	0.0029076	-0.0012651	0.0025267	0.739746	not_sig
1	25768937	A	G	LDL	0.0255	0.0016	9.943e-55	0.0269	0.0019	1.171e-46	0.1027	not_sig	-0.00246131	0.00292886	-0.00266971	0.0026854	0.957753	not_sig	0.00257716	0.00304442	-0.00837457	0.00269526	0.00682373	not_sig	0.00017206	0.00095634	0.00053359	0.0012302	0.872999	not_sig	-0.00012638	0.0019369	-0.0051472	0.0016859	0.031481	not_sig
1	26512556	T	C	LDL	-0.0307	0.0057	9.073e-08	-0.0409	0.0064	1.6e-10	0.7209	not_sig	-0.00850243	0.00867117	0.00635518	0.00787863	0.20023	not_sig	-0.00470066	0.00901515	-0.0113835	0.00790709	0.575646	not_sig	-0.0050464	0.0028334	-0.00057706	0.0036065	0.213985	not_sig	-0.0032714	0.0057386	-0.0032495	0.0049426	0.983519	not_sig
1	27021913	C	G	LDL	-0.0584	0.006	3.092e-22	-0.1121	0.0065	7.576e-66	2.785e-07	sig	0.00657268	0.00982459	0.0148856	0.00890627	0.526615	not_sig	-0.00866534	0.0102144	-0.0173837	0.00894055	0.51887	not_sig	-0.0051686	0.0031868	-0.00012839	0.0040583	0.226789	not_sig	-0.0046757	0.0064543	0.0016983	0.0055618	0.428466	not_sig
1	27668610	T	C	LDL	-0.0289	0.0048	1.969e-09	-0.05	0.0053	4.962e-21	0.03153	not_sig	0.00996274	0.00776018	0.00584444	0.00707687	0.692057	not_sig	0.00281565	0.00806493	0.00635744	0.00710501	0.740662	not_sig	-0.0038835	0.0025109	0.001731	0.0032119	0.12429	not_sig	0.00011973	0.0050854	0.0011243	0.0044017	0.868865	not_sig
1	45810865	A	G	LDL	0.0196	0.0033	2.587e-09	0.0243	0.0037	6.196e-11	0.2393	not_sig	0.0071486	0.00533221	-0.00314307	0.00489167	0.150841	not_sig	-0.011127	0.00554287	0.00429806	0.00491018	0.0364148	not_sig	0.00052202	0.0017486	-0.0020278	0.0022499	0.400959	not_sig	-0.003986	0.0035415	-0.00097062	0.0030834	0.510091	not_sig
1	49263479	A	G	LDL	0.1391	0.0259	8.13e-08	0.1408	0.0284	7.02e-07	0.1674	not_sig	NA	NA	NA	NA	NA	NA	NA	NA	NA	NA	NA	NA	NA	NA	NA	NA	NA	NA	NA	NA	NA	NA	NA	NA
1	52262405	A	G	LDL	-0.1506	0.0251	1.908e-09	-0.1935	0.0274	1.791e-12	0.1508	not_sig	NA	NA	NA	NA	NA	NA	NA	NA	NA	NA	NA	NA	NA	NA	NA	NA	NA	NA	NA	NA	NA	NA	NA	NA
1	54246772	T	C	LDL	-0.1676	0.0218	1.429e-14	-0.2252	0.0257	2.117e-18	0.9891	not_sig	NA	NA	NA	NA	NA	NA	NA	NA	NA	NA	NA	NA	NA	NA	NA	NA	NA	NA	NA	NA	NA	NA	NA	NA
1	54824117	A	G	LDL	0.1201	0.0133	2.01e-19	0.1013	0.015	1.268e-11	0.8056	not_sig	-0.0280811	0.0301759	-0.00323328	0.0280864	0.542647	not_sig	-0.0422927	0.0313733	0.0216959	0.0281568	0.127353	not_sig	NA	NA	NA	NA	NA	NA	NA	NA	NA	NA	NA	NA
1	55505647	T	G	LDL	0.4373	0.0069	1.35e-874	0.4477	0.0079	8.81e-700	0.1529	not_sig	-0.0124435	0.0110792	-0.00553933	0.0101646	0.642787	not_sig	-0.00646062	0.0115173	-0.0217324	0.0102038	0.318824	not_sig	-0.0022837	0.0036278	-0.0021769	0.0046638	0.874976	not_sig	0.0032002	0.0073474	0.00704	0.0063915	0.651742	not_sig
1	56840574	A	C	LDL	-0.3915	0.0254	1.47e-53	-0.3327	0.029	1.968e-30	0.6498	not_sig	NA	NA	NA	NA	NA	NA	NA	NA	NA	NA	NA	NA	NA	NA	NA	NA	NA	NA	NA	NA	NA	NA	NA	NA
1	57872099	T	C	LDL	-0.1261	0.0233	5.886e-08	-0.1664	0.0285	5.348e-09	0.04258	not_sig	0.237204	0.106871	-0.00753362	0.0961494	0.0855199	not_sig	0.00325171	0.111112	-0.0401325	0.096519	0.767178	not_sig	NA	NA	NA	NA	NA	NA	NA	NA	NA	NA	NA	NA
1	61865627	T	C	LDL	0.0093	0.0019	1.229e-06	0.0113	0.0022	2.604e-07	0.7393	not_sig	-0.00329492	0.00358474	-0.00458813	0.00328641	0.788245	not_sig	0.00642375	0.00372616	0.00267509	0.00329861	0.449288	not_sig	-0.00025755	0.001168	0.0018759	0.0015028	0.308882	not_sig	-0.002889	0.0023655	0.0022991	0.0020595	0.0773014	not_sig
1	62920008	A	G	LDL	-0.0364	0.0018	6.99e-96	-0.0499	0.002	3.09e-140	0.01078	not_sig	-0.00511366	0.00305051	-0.00816276	0.0028037	0.457286	not_sig	0.00545301	0.003171	-0.00727141	0.00281446	0.00257501	not_sig	0.00041405	0.00099392	-0.0019608	0.001282	0.174329	not_sig	0.00044191	0.002013	0.00029632	0.0017569	0.959533	not_sig
1	63679932	A	C	LDL	-0.3618	0.0872	3.35e-05	-0.3825	0.0789	1.255e-06	0.7886	not_sig	-0.0310148	0.0874573	0.0982268	0.0770414	0.262721	not_sig	0.0428402	0.0909278	0.0795283	0.0773376	0.757551	not_sig	NA	NA	NA	NA	NA	NA	NA	NA	NA	NA	NA	NA
1	66130398	A	G	LDL	0.0074	0.0017	9.919e-06	0.0094	0.0019	1.041e-06	0.3167	not_sig	0.00358309	0.00294405	-0.00169294	0.00270878	0.182839	not_sig	0.00284888	0.00306003	-0.00887996	0.00271886	0.00400273	not_sig	0.0023461	0.00095407	0.00075735	0.0012318	0.151665	not_sig	0.0035628	0.0019323	0.002293	0.0016882	0.640446	not_sig
1	92971951	T	C	LDL	0.023	0.0021	5.578e-27	0.0238	0.0024	7.51e-23	0.6698	not_sig	-0.0161733	0.00360056	-0.0141878	0.00330605	0.681608	not_sig	-0.012529	0.00374331	-0.00154401	0.00331845	0.0274112	not_sig	-0.00093348	0.0011736	0.00147	0.0015115	0.206334	not_sig	-0.00095242	0.002377	-0.0042371	0.0020715	0.245553	not_sig
1	107607037	T	G	LDL	-0.0126	0.0019	1.68e-11	-0.0161	0.0022	3.574e-13	0.03627	not_sig	-0.012327	0.00310884	-0.012713	0.00285661	0.926424	not_sig	-0.00343979	0.0032318	-0.011539	0.00286763	0.0597253	not_sig	NA	NA	NA	NA	NA	NA	NA	NA	NA	NA	NA	NA
1	109310728	A	G	LDL	0.0802	0.0078	7.836e-25	0.0393	0.0087	5.655e-06	0.002612	not_sig	-0.00123715	0.0110018	0.00868051	0.0102342	0.504977	not_sig	0.00323275	0.0114353	-0.0134333	0.010269	0.276084	not_sig	-0.0030813	0.0035862	0.0025142	0.0046815	0.310792	not_sig	-0.00016529	0.0072631	-0.0041022	0.0064158	0.65477	not_sig
1	109817590	T	G	LDL	0.1602	0.002	9.25e-1446	0.1465	0.0023	5.91e-900	4.862e-07	sig	-0.00193183	0.00350018	-0.00235129	0.00321685	0.928985	not_sig	-0.000629209	0.00363853	-0.00859229	0.00322925	0.10016	not_sig	-0.0013215	0.0011424	-0.0010995	0.0014727	0.71659	not_sig	-0.0054728	0.0023136	-0.0044253	0.0020183	0.782168	not_sig
1	110326545	A	G	LDL	0.0748	0.0078	8.389e-22	0.0497	0.0084	3.045e-09	0.1182	not_sig	-0.0155493	0.0136331	0.0134841	0.0122952	0.110189	not_sig	-0.00435304	0.0141726	0.00388073	0.0123364	0.659837	not_sig	NA	NA	NA	NA	NA	NA	NA	NA	NA	NA	NA	NA
1	150958836	A	G	LDL	-0.0175	0.0024	1.199e-13	-0.0228	0.0027	2.341e-17	0.4681	not_sig	0.00666573	0.00396323	-0.000192925	0.00363089	0.197448	not_sig	0.00416154	0.00412013	0.00780688	0.00364397	0.505623	not_sig	0.0010674	0.0012941	-0.0019989	0.0016627	0.149256	not_sig	-0.0033179	0.0026209	-0.0042698	0.0022786	0.723446	not_sig
1	151658543	A	G	LDL	0.0956	0.0178	8.234e-08	0.1319	0.0184	7.817e-13	0.09393	not_sig	-0.0227913	0.026749	-0.0261893	0.0239585	0.923858	not_sig	0.0360085	0.0277993	0.015013	0.0240506	0.566187	not_sig	-0.0069415	0.008395	-0.022881	0.010569	0.407689	not_sig	0.0067076	0.017003	0.0098073	0.014484	0.865712	not_sig
1	155106054	A	G	LDL	-0.0103	0.0017	6.821e-10	-0.0129	0.0019	1.205e-11	0.6277	not_sig	0.00206378	0.00290761	0.0133838	0.0026773	0.00381793	not_sig	-0.0109155	0.00302238	0.00107274	0.0026874	0.00290831	not_sig	0.00052424	0.00094768	-0.0013587	0.0012245	0.239929	not_sig	-0.0027791	0.0019193	-0.0022464	0.0016781	0.865472	not_sig
1	158586966	A	T	LDL	0.0108	0.0018	1.567e-09	0.0104	0.002	3.509e-07	0.224	not_sig	0.00180829	0.00325178	0.00218297	0.00297847	0.931608	not_sig	-0.000327496	0.00338003	-0.00584535	0.00298944	0.219362	not_sig	0.0001049	0.0010591	-0.0020949	0.0013613	0.261238	not_sig	-0.00071359	0.002145	0.0011514	0.0018656	0.4796	not_sig
1	161531340	A	G	LDL	-0.0154	0.0034	7.087e-06	-0.0235	0.004	4.456e-09	0.1518	not_sig	0.0041014	0.00578764	-0.0119048	0.00533319	0.0399534	not_sig	-0.00345607	0.00601603	-0.009984	0.00535366	0.415543	not_sig	0.00032722	0.0018375	0.0020823	0.0023709	0.641588	not_sig	0.00015445	0.0037215	0.001035	0.0032492	0.843405	not_sig
1	177938437	A	G	LDL	0.0123	0.0021	7.16e-09	0.0129	0.0024	7.583e-08	0.5957	not_sig	-0.0131704	0.00392885	-0.0156757	0.00360985	0.635301	not_sig	-0.00280876	0.00408393	0.00398139	0.00362314	0.211581	not_sig	-0.00054311	0.0012768	0.00013928	0.0016455	0.704929	not_sig	-0.0074036	0.0025859	-0.0031079	0.0022551	0.20895	not_sig
1	182165484	A	G	LDL	-0.0125	0.0018	1.156e-12	-0.0148	0.002	1.405e-13	0.65	not_sig	-0.00259765	0.00309659	0.00280149	0.00283692	0.194101	not_sig	0.00109952	0.00321874	0.00455318	0.00284772	0.419574	not_sig	0.0013609	0.0010086	0.0012545	0.0012964	0.719032	not_sig	0.0032707	0.0020426	0.00035506	0.0017767	0.264146	not_sig
1	183065406	A	G	LDL	0.0129	0.0017	8.373e-15	0.0106	0.0019	3.049e-08	0.2017	not_sig	-6.15761e-05	0.00294018	0.000406487	0.0026956	0.905654	not_sig	-0.00073183	0.00305636	-0.000273657	0.00270567	0.910237	not_sig	-0.0019	0.00095817	0.0015682	0.0012324	0.0180415	not_sig	-0.00094158	0.0019406	-0.0041084	0.0016889	0.16986	not_sig
1	197129981	T	C	LDL	-0.0084	0.0022	0.000133	-0.0146	0.0025	5.039e-09	0.2292	not_sig	-0.00493912	0.00396436	-0.00770124	0.00363146	0.603809	not_sig	-0.0042589	0.00412048	-0.0130288	0.00364596	0.109378	not_sig	-0.00053858	0.0012927	3.8281e-05	0.0016619	0.741124	not_sig	0.0024772	0.002618	-0.0031648	0.0022776	0.0806387	not_sig
1	199010721	T	C	LDL	-0.0089	0.0019	2.684e-06	-0.0115	0.0021	5.301e-08	0.3897	not_sig	3.71533e-05	0.00328658	-0.000366097	0.00301643	0.927251	not_sig	-0.00275725	0.00341635	-0.00631341	0.00302775	0.433949	not_sig	-0.0013381	0.0010665	-0.0013294	0.001374	0.774462	not_sig	-0.00065934	0.0021601	0.0029799	0.001883	0.166798	not_sig
1	220970028	A	G	LDL	0.0267	0.0019	7.091e-47	0.0315	0.0021	5.097e-50	0.458	not_sig	-0.00421277	0.00318144	8.40832e-05	0.00292356	0.315152	not_sig	-0.00125332	0.00330724	0.00019818	0.00293456	0.741602	not_sig	-0.00068022	0.0010379	0.00063611	0.0013383	0.412906	not_sig	0.00064687	0.0021021	0.0028929	0.0018341	0.369558	not_sig
1	224545410	T	C	LDL	-0.0115	0.002	9.514e-09	-0.0115	0.0023	5.11e-07	0.7241	not_sig	0.00504648	0.00356588	-0.00386867	0.00326739	0.0626243	not_sig	-0.00390428	0.00370686	-0.00153559	0.00327927	0.63072	not_sig	-0.00025428	0.0011573	0.0025894	0.0014887	0.176476	not_sig	-0.0012861	0.0023438	-0.0019479	0.0020401	0.797307	not_sig
1	234853268	A	C	LDL	0.04	0.0017	2.69e-122	0.0392	0.0019	2.63e-94	0.3275	not_sig	-0.00378768	0.00293178	0.00181404	0.00268902	0.154952	not_sig	-0.00114454	0.00304751	0.00422619	0.00269909	0.185134	not_sig	0.00017527	0.00095279	-0.00094917	0.0012262	0.504953	not_sig	0.0014345	0.0019297	0.00048364	0.0016804	0.705919	not_sig
1	246892695	A	G	LDL	-0.014	0.0027	1.765e-07	-0.0158	0.0031	4.143e-07	0.4249	not_sig	0.00444716	0.0050751	-0.0114574	0.00463671	0.0194453	not_sig	0.00206299	0.00527559	-0.00848305	0.00465361	0.132133	not_sig	-0.00058553	0.0016474	-0.0018295	0.002112	0.748463	not_sig	-0.0020138	0.0033364	-0.00246	0.0028945	0.891702	not_sig
10	17259642	C	G	LDL	0.0124	0.0016	3.987e-14	0.0176	0.0019	7.695e-20	0.02364	not_sig	-0.00130968	0.00296739	0.00925503	0.00272216	0.00805069	not_sig	0.00095698	0.00307658	-0.00310542	0.00273501	0.321582	not_sig	-0.001266	0.00096235	-0.00082929	0.0012374	0.591463	not_sig	-0.0018792	0.0019394	-0.00033237	0.0016928	0.535341	not_sig
10	43918823	A	T	LDL	0.0117	0.002	7.565e-09	0.0093	0.0025	0.0001685	0.215	not_sig	-0.00107835	0.00333907	0.000158552	0.00306789	0.782916	not_sig	0.00136557	0.00346199	-0.00280594	0.00308216	0.366029	not_sig	NA	NA	NA	NA	NA	NA	NA	NA	NA	NA	NA	NA
10	45953767	A	G	LDL	0.0085	0.0017	9.34e-07	0.0125	0.002	4.557e-10	0.08609	not_sig	-0.00177237	0.00315093	-0.00658449	0.00288484	0.255232	not_sig	-0.000430091	0.00326677	0.00513904	0.0028986	0.200263	not_sig	0.00046083	0.0010223	-0.00032047	0.0013123	0.612173	not_sig	0.00014321	0.0020602	0.0014111	0.0017953	0.608202	not_sig
10	52573772	T	C	LDL	-0.0776	0.0098	2.794e-15	-0.0691	0.0112	7.216e-10	0.6182	not_sig	-0.00663358	0.0148365	-0.0220037	0.0134257	0.437831	not_sig	-0.00127848	0.0153779	0.022546	0.0134892	0.242075	not_sig	0.0048714	0.0048092	0.0049706	0.0060988	0.827079	not_sig	-0.0066895	0.009692	0.0012153	0.0083433	0.515437	not_sig
10	54534837	A	T	LDL	0.0107	0.0024	5.797e-06	0.0131	0.0027	9.526e-07	0.3602	not_sig	-0.00651743	0.00418523	0.0121998	0.00384645	0.000881347	not_sig	-0.0018747	0.00433898	0.00112061	0.00386438	0.604606	not_sig	0.0010199	0.0013574	-0.00080402	0.0017483	0.378455	not_sig	-0.0056444	0.0027355	0.0020425	0.0023917	0.0251969	not_sig
10	65128619	A	G	LDL	-0.0166	0.0016	4.727e-24	-0.0131	0.0019	2.481e-12	0.02823	not_sig	0.00986424	0.00292957	0.0124736	0.00269005	0.507547	not_sig	0.00497562	0.00303746	0.0128959	0.00270285	0.0503975	not_sig	-0.0002555	0.00095003	-0.00023647	0.0012227	0.94329	not_sig	0.0041184	0.0019146	0.0034959	0.0016727	0.857442	not_sig
10	71094504	T	C	LDL	-0.0282	0.003	1.385e-21	-0.0243	0.0033	2.789e-13	0.07777	not_sig	-0.00529665	0.00470128	0.00742035	0.00432143	0.0442713	not_sig	-0.00151053	0.00487412	-0.00207147	0.00434145	0.931214	not_sig	0.0025049	0.0015225	-0.0012251	0.0019616	0.0954083	not_sig	0.0033474	0.0030682	0.0040089	0.0026835	0.823079	not_sig
10	74665640	A	C	LDL	0.0267	0.0037	3.391e-13	0.0312	0.0041	1.868e-14	0.9776	not_sig	-0.010565	0.00719846	0.00376985	0.00662457	0.13886	not_sig	0.00624038	0.00746528	0.0182928	0.00665604	0.22614	not_sig	-0.00011071	0.0023313	-0.00098024	0.0030071	0.851856	not_sig	0.0125	0.0046982	0.0089342	0.0041138	0.605248	not_sig
10	89805410	A	C	LDL	0.022	0.0048	3.974e-06	0.0278	0.0054	2.877e-07	0.5814	not_sig	0.00172542	0.00793093	0.00746518	0.00728489	0.590334	not_sig	-0.00569258	0.00822117	0.00334401	0.00731651	0.409525	not_sig	-0.0035003	0.0025577	0.0017068	0.0032929	0.165604	not_sig	0.0075309	0.0051545	-0.0067728	0.0045048	0.0254297	not_sig
10	91002804	T	C	LDL	0.008	0.0017	2.844e-06	0.0089	0.0019	4.755e-06	0.1847	not_sig	-0.00369826	0.00309422	0.000958223	0.0028372	0.262568	not_sig	0.00311957	0.00320762	-0.00148417	0.00285081	0.281247	not_sig	8.9696e-05	0.0010031	0.001635	0.0012893	0.425685	not_sig	-0.00057642	0.0020215	0.0012775	0.0017638	0.454855	not_sig
10	94839642	A	G	LDL	0.014	0.0017	1.928e-17	0.0216	0.0019	8.962e-30	0.006609	not_sig	-0.00731299	0.00294027	-0.00825092	0.00269613	0.812287	not_sig	-0.00629752	0.00304837	0.00320148	0.00270908	0.0193097	not_sig	0.0007834	0.00095446	0.0027381	0.0012267	0.367607	not_sig	0.001339	0.0019235	-0.0026141	0.0016782	0.0944425	not_sig
10	96032866	T	C	LDL	-0.015	0.0018	1.344e-16	-0.0045	0.002	0.0268	0.0006453	not_sig	0.00346774	0.0032076	0.00573606	0.00293931	0.598461	not_sig	0.0022037	0.00332519	0.00193551	0.00295348	0.951703	not_sig	-0.00011805	0.00104	-0.00067817	0.0013355	0.794801	not_sig	-0.0011014	0.0020958	0.00094958	0.001827	0.430351	not_sig
10	102075479	A	G	LDL	-0.0163	0.0022	5.565e-14	-0.0164	0.0025	5.878e-11	0.7494	not_sig	0.00178139	0.00388619	-0.00380628	0.00356279	0.284398	not_sig	0.00633574	0.00402945	0.0143318	0.00357989	0.136212	not_sig	-0.00054817	0.0012626	0.00062704	0.0016212	0.554187	not_sig	0.0038754	0.0025445	0.0032678	0.0022179	0.893066	not_sig
10	113940329	T	C	LDL	-0.0221	0.0018	4.608e-33	-0.0283	0.0021	1.083e-41	0.01514	not_sig	0.00587751	0.00327829	0.00929603	0.00300353	0.437396	not_sig	-0.00165221	0.00339919	-0.00973758	0.00301803	0.0740099	not_sig	-8.3413e-05	0.0010648	-0.0016097	0.0013664	0.457583	not_sig	-0.00039698	0.0021459	0.00052321	0.0018693	0.728181	not_sig
10	118397894	A	G	LDL	0.0167	0.0016	1.291e-24	0.016	0.0019	1.022e-17	0.4099	not_sig	-0.00149361	0.00293002	-0.00282387	0.00268571	0.735327	not_sig	0.00132064	0.00303786	0.00319092	0.00269858	0.643859	not_sig	-0.00066637	0.00095696	0.00023436	0.0012308	0.51207	not_sig	0.0034666	0.0019285	0.0012777	0.0016838	0.38725	not_sig
10	124693587	T	G	LDL	-0.0202	0.0016	9.15e-35	-0.0202	0.0019	3.75e-27	0.5881	not_sig	-0.00388765	0.00295842	0.001986	0.00271938	0.139837	not_sig	0.00125891	0.00306706	0.00369482	0.00273211	0.551401	not_sig	0.0024637	0.00095949	-0.00053948	0.001236	0.0253941	not_sig	-0.0042467	0.0019337	-4.0502e-05	0.0016908	0.0876834	not_sig
11	1081287	A	G	LDL	0.0371	0.0049	5.795e-14	0.0197	0.0055	0.0003644	0.05236	not_sig	0.00539899	0.00833313	-9.22134e-05	0.00767843	0.624505	not_sig	0.00544646	0.00864204	-0.0019844	0.00771626	0.519432	not_sig	0.002948	0.0026893	0.0064195	0.0034729	0.662396	not_sig	0.00072309	0.0054317	0.0031446	0.0047529	0.70833	not_sig
11	4993424	A	T	LDL	0.2371	0.0352	1.53e-11	0.1584	0.0362	1.183e-05	0.685	not_sig	-0.0682474	0.0769215	-0.0100215	0.0699578	0.571653	not_sig	0.0737351	0.0797714	-0.124397	0.0702987	0.0612561	not_sig	NA	NA	NA	NA	NA	NA	NA	NA	NA	NA	NA	NA
11	5701074	A	C	LDL	-0.0306	0.0035	4.258e-18	-0.0576	0.0044	7.231e-40	0.004937	not_sig	NA	NA	NA	NA	NA	NA	NA	NA	NA	NA	NA	NA	0.0013248	0.0018496	-0.0022123	0.0023781	0.240004	not_sig	0.00019883	0.0037356	3.6931e-05	0.0032546	0.973127	not_sig
11	18645668	T	C	LDL	0.018	0.0018	3.21e-23	0.0224	0.0021	2.525e-27	0.753	not_sig	0.00166294	0.00334456	-0.00341427	0.003066	0.258367	not_sig	0.00922038	0.00346756	0.00864531	0.00308065	0.900897	not_sig	-0.00053288	0.001085	0.00060821	0.0013942	0.50398	not_sig	-0.0011701	0.0021914	-0.00087066	0.0019081	0.927488	not_sig
11	47974373	A	C	LDL	-0.0107	0.0018	1.135e-09	-0.009	0.002	8.162e-06	0.4735	not_sig	NA	NA	NA	NA	NA	NA	NA	NA	NA	NA	NA	NA	0.00089712	0.0010033	0.00039406	0.0012908	0.640521	not_sig	-0.0035141	0.0020263	-0.0024495	0.0017665	0.716621	not_sig
11	61588305	A	G	LDL	-0.0368	0.0018	6.52e-98	-0.05	0.002	4.79e-138	0.02103	not_sig	-0.00203168	0.00307048	0.00788664	0.00281719	0.0162125	not_sig	-0.00860246	0.00318362	-0.00438129	0.00283086	0.319632	not_sig	-8.4694e-05	0.00099536	-0.00023355	0.00128	0.952066	not_sig	0.00025924	0.0020103	0.00080198	0.0017518	0.818879	not_sig
11	63615561	T	C	LDL	-0.0103	0.0017	2.967e-09	-0.0131	0.002	4.161e-11	0.2437	not_sig	0.00814394	0.00302275	0.00269131	0.00277258	0.179366	not_sig	0.00395503	0.00313406	-0.00469818	0.00278584	0.0381984	not_sig	2.0093e-05	0.00097982	-0.0033797	0.0012595	0.0651676	not_sig	0.0016107	0.001979	-0.00079089	0.0017238	0.331298	not_sig
11	65570517	T	C	LDL	-0.0148	0.0026	1.133e-08	-0.0144	0.003	1.531e-06	0.6635	not_sig	-0.0165674	0.00498495	-0.0077067	0.00458747	0.186472	not_sig	0.00439156	0.00516806	0.0277498	0.00460955	0.000704342	not_sig	0.0023831	0.0016175	0.0039262	0.0020867	0.862074	not_sig	0.0017115	0.0032669	0.0048479	0.0028558	0.414592	not_sig
11	66302743	T	C	LDL	0.0099	0.0019	2.563e-07	0.0181	0.0022	1.214e-16	0.01515	not_sig	0.00543837	0.0034275	0.00882262	0.0031522	0.462907	not_sig	0.00632448	0.00355372	-6.66413e-05	0.00316699	0.177476	not_sig	-0.00073407	0.0011118	-0.0012718	0.0014328	0.914299	not_sig	0.00152	0.0022456	0.0023111	0.0019609	0.74923	not_sig
11	103870755	C	G	LDL	0.0144	0.0022	3.393e-11	0.0147	0.0024	1.018e-09	0.8468	not_sig	-0.00534329	0.00372973	-0.00515287	0.00341799	0.969673	not_sig	0.000612021	0.0038677	0.001697	0.00343479	0.83314	not_sig	-0.0028505	0.0012086	-4.0759e-05	0.0015524	0.0777116	not_sig	0.00061983	0.002441	-0.00067079	0.0021245	0.668929	not_sig
6	127437617	T	C	HDL	0.0141	0.0016	7.676e-19	0.0245	0.0018	4.957e-42	8.007e-05	sig	0.000265964	0.0029307	-0.000894912	0.00268942	0.768161	not_sig	-0.01934	0.00304053	-0.0555126	0.00269381	3.75403e-19	sig	0.0010956	0.00094994	0.0025452	0.0012219	0.582912	not_sig	0.00028545	0.0019189	0.0022355	0.0016739	0.396698	not_sig
11	117220429	A	C	LDL	-0.1429	0.0244	4.444e-09	-0.1186	0.0305	9.845e-05	0.07118	not_sig	-0.0694524	0.0463305	0.0236531	0.0457303	0.148553	not_sig	0.0407146	0.0480469	0.113616	0.0459532	0.270729	not_sig	NA	NA	NA	NA	NA	NA	NA	NA	NA	NA	NA	NA
11	118449370	A	G	LDL	0.0213	0.0024	3.041e-18	0.0162	0.0027	2.17e-09	0.3541	not_sig	-0.00960917	0.00442625	-0.00678408	0.00407166	0.63517	not_sig	-0.00459256	0.00459012	-0.00300948	0.00409099	0.795939	not_sig	0.0011299	0.0014364	0.00030911	0.0018503	0.631511	not_sig	0.004689	0.0029012	0.0041461	0.0025323	0.930107	not_sig
11	121330087	A	G	LDL	0.0075	0.0017	1.16e-05	0.01	0.0019	2.055e-07	0.5172	not_sig	-0.000345655	0.00299068	0.00222285	0.00274024	0.522441	not_sig	-0.00386892	0.00310113	-0.00162675	0.0027534	0.587096	not_sig	0.0001738	0.00096255	-0.0002137	0.0012359	0.799336	not_sig	-0.00058718	0.0019441	-6.6221e-05	0.0016914	0.834021	not_sig
11	122523596	A	G	LDL	-0.0164	0.0017	1.802e-22	-0.0143	0.0019	6.594e-14	0.1425	not_sig	-0.0097873	0.00301326	-0.0143416	0.00277284	0.261282	not_sig	0.000143505	0.00312446	-0.000101822	0.00278611	0.953062	not_sig	-0.0018646	0.00097698	-0.0019949	0.0012598	0.71995	not_sig	0.0013503	0.0019732	0.0023409	0.0017241	0.657222	not_sig
11	126225876	C	G	LDL	0.062	0.0033	1.488e-79	0.0634	0.0037	2.915e-66	0.6096	not_sig	-0.000156992	0.00566194	0.0103274	0.00520653	0.168591	not_sig	-0.00696393	0.00587196	-0.00207615	0.005231	0.532445	not_sig	-0.0029559	0.0018347	0.00074991	0.0023641	0.152138	not_sig	-0.0042028	0.0037056	-0.0010995	0.0032354	0.518326	not_sig
12	623129	A	G	LDL	0.0156	0.002	3.076e-15	0.024	0.0023	3.161e-26	0.1356	not_sig	0.00660779	0.00332518	-0.000791689	0.00305533	0.0979097	not_sig	0.00159482	0.00344717	-0.00439157	0.00306235	0.192225	not_sig	0.00097341	0.0010803	-0.00010169	0.0013903	0.465335	not_sig	0.0020136	0.0021758	-0.0025959	0.0019014	0.0865124	not_sig
12	4384844	T	G	LDL	-0.0534	0.0074	4.178e-13	-0.0571	0.0079	4.792e-13	0.47	not_sig	0.0734387	0.0125474	0.015202	0.0115482	0.000561793	not_sig	-0.0381514	0.0130034	-0.0454344	0.0115676	0.674255	not_sig	NA	NA	NA	NA	NA	NA	NA	NA	NA	NA	NA	NA
12	9082581	A	G	LDL	-0.0242	0.0026	3.349e-20	-0.0236	0.003	2.054e-15	0.2386	not_sig	-0.000995395	0.00482476	0.0047042	0.00443879	0.379883	not_sig	-0.00874206	0.00500201	-0.00367411	0.00444921	0.447028	not_sig	0.0013695	0.0015677	-0.0031617	0.0020206	0.0841831	not_sig	-0.0044268	0.0031573	-0.00051366	0.0027634	0.333867	not_sig
12	25409070	T	C	LDL	-0.0244	0.0035	2.249e-12	-0.0324	0.0039	2.228e-16	0.4606	not_sig	-0.00173407	0.0056355	0.00145612	0.00519832	0.674278	not_sig	-0.00243554	0.00584301	0.00456073	0.00521037	0.369391	not_sig	-0.0012834	0.0018277	-0.00086097	0.0023609	0.779458	not_sig	-0.003372	0.003681	0.0010354	0.0032288	0.341695	not_sig
12	29491528	A	G	LDL	-0.0079	0.0018	7.576e-06	-0.0107	0.002	1.263e-07	0.4217	not_sig	0.00181425	0.00328844	-0.00204891	0.00301236	0.381595	not_sig	0.00207289	0.00340895	-0.00272468	0.00301952	0.289989	not_sig	-0.00026304	0.0010648	0.0015171	0.0013658	0.345773	not_sig	0.0014423	0.0021444	0.00070052	0.0018679	0.795949	not_sig
12	40580318	T	C	LDL	0.0196	0.0031	3.381e-10	0.0209	0.0034	1.294e-09	0.8237	not_sig	-0.0124623	0.00580329	-0.00731761	0.00532729	0.509488	not_sig	-0.0041164	0.00601586	0.00174806	0.00533993	0.464005	not_sig	-0.0011724	0.0018766	0.0016009	0.002413	0.355485	not_sig	0.0037957	0.0037793	0.0022309	0.0033001	0.76349	not_sig
12	51103633	T	C	LDL	0.0165	0.0018	1.853e-19	0.0176	0.0021	2.989e-17	0.965	not_sig	0.00158612	0.00307422	0.00701552	0.00281769	0.188492	not_sig	-0.00364616	0.00318673	0.00903768	0.00282428	0.00277277	not_sig	0.0020544	0.00099751	-0.0012145	0.0012804	0.0276337	not_sig	8.6096e-05	0.002009	0.0010252	0.0017511	0.697331	not_sig
12	51783420	A	T	LDL	0.0137	0.0017	2.813e-15	0.0118	0.002	3.312e-09	0.08464	not_sig	0.00282728	0.0029802	0.004554	0.00273467	0.666326	not_sig	-1.39592e-05	0.00308963	0.00232306	0.00274113	0.56982	not_sig	0.00084213	0.00096313	0.00079619	0.001238	0.824183	not_sig	0.0042832	0.0019397	0.0023631	0.0016931	0.466897	not_sig
12	53265945	T	C	LDL	-0.0096	0.0017	7.031e-09	-0.0109	0.0019	6.741e-09	0.6792	not_sig	0.00195477	0.00298378	0.000831826	0.00273775	0.779405	not_sig	0.00468134	0.00309336	-0.00088529	0.002744	0.176326	not_sig	-4.4776e-05	0.00096735	-2.7093e-05	0.001243	0.98395	not_sig	0.0011868	0.0019482	0.00085147	0.0017	0.906733	not_sig
12	53793314	A	C	LDL	-0.0107	0.0021	3.051e-07	-0.016	0.0024	1.935e-11	0.6086	not_sig	-0.00923031	0.0038507	-0.0125831	0.00353797	0.51724	not_sig	-0.0068939	0.00399263	0.00595568	0.00354617	0.0156545	not_sig	-0.0012255	0.0012474	0.0030357	0.0016048	0.0422096	not_sig	0.0081652	0.0025121	-0.00035344	0.0021948	0.00757487	not_sig
12	57645789	A	T	LDL	0.0119	0.0021	1.34e-08	0.0191	0.0024	6.214e-16	0.5958	not_sig	-0.0123729	0.00367428	-0.00703532	0.00335584	0.278625	not_sig	0.00388935	0.00380913	0.000336197	0.00336375	0.482504	not_sig	-0.00014046	0.0011872	8.2704e-05	0.0015183	0.899272	not_sig	-0.00181	0.0023909	-0.0027006	0.0020765	0.733452	not_sig
12	72179446	T	C	LDL	-0.048	0.0071	1.086e-11	-0.0587	0.0085	6.307e-12	0.4311	not_sig	-0.0497299	0.0105855	-0.0363888	0.00957353	0.345107	not_sig	0.00658443	0.0109714	0.000973198	0.00959567	0.699001	not_sig	0.0065113	0.003445	0.0095512	0.0043571	0.966079	not_sig	-0.004699	0.0069381	-0.0054683	0.0059588	0.903855	not_sig
12	89921860	A	T	LDL	0.009	0.0018	3.776e-07	0.012	0.002	2.33e-09	0.06922	not_sig	0.00598791	0.00307373	0.00406965	0.00281839	0.642212	not_sig	-0.00121959	0.00318648	0.00177571	0.00282494	0.479883	not_sig	0.0013271	0.00099693	0.00029532	0.0012807	0.396079	not_sig	0.00032534	0.0020078	-0.0013099	0.0017515	0.504427	not_sig
12	92802078	T	C	LDL	0.007	0.0017	3.008e-05	0.0123	0.0019	1.211e-10	0.0205	not_sig	0.00242829	0.00293423	-0.00221349	0.00269376	0.239176	not_sig	0.00723932	0.00304224	0.0018559	0.00270008	0.183743	not_sig	4.1827e-05	0.00095057	0.00086865	0.0012219	0.651832	not_sig	0.0024006	0.0019144	5.0039e-06	0.0016711	0.325323	not_sig
12	100836797	T	C	LDL	-0.0097	0.0017	8.398e-09	-0.0138	0.0019	7.472e-13	0.4388	not_sig	-0.00554449	0.00293829	-0.00286326	0.00270331	0.497588	not_sig	-0.00113662	0.0030462	0.00631025	0.0027097	0.0665612	not_sig	0.00086538	0.00095258	-0.00086067	0.0012277	0.24451	not_sig	-0.0051792	0.0019184	0.0013667	0.001679	0.00675527	not_sig
12	102806305	T	C	LDL	0.0106	0.0018	4.087e-09	0.0111	0.002	5.924e-08	0.9776	not_sig	0.0049185	0.00324706	-0.00130999	0.00297669	0.153243	not_sig	-0.0198347	0.00336624	-0.0029178	0.00298376	0.000158503	not_sig	0.0017648	0.0010501	-0.0021432	0.001349	0.0186721	not_sig	0.0038464	0.0021149	0.0050811	0.0018449	0.576197	not_sig
12	105606068	C	G	LDL	0.0189	0.0031	1.294e-09	0.0204	0.0035	6.25e-09	0.7226	not_sig	0.010413	0.00505862	0.00876242	0.0046792	0.808827	not_sig	-0.00875315	0.00524397	0.0060476	0.00468981	0.0345908	not_sig	0.0039612	0.0016359	-0.0042412	0.0021172	0.00140518	not_sig	-0.00061797	0.0032946	0.00092737	0.0028955	0.704504	not_sig
12	109171697	A	T	LDL	-0.0086	0.0018	1.278e-06	-0.0187	0.002	6.29e-21	0.0004646	not_sig	0.00868055	0.00319594	-0.0022646	0.0029339	0.0108277	not_sig	0.00091329	0.00331316	0.00158278	0.00294077	0.879351	not_sig	-0.00042454	0.0010336	-0.0012852	0.0013291	0.727165	not_sig	0.0019574	0.0020816	0.0027638	0.0018177	0.719107	not_sig
12	110000193	T	C	LDL	-0.0063	0.0016	0.0001199	-0.0094	0.0019	5.128e-07	0.871	not_sig	-0.00948735	0.00292678	-0.0082628	0.00268274	0.755398	not_sig	0.000886086	0.00303438	0.00476988	0.00268897	0.335974	not_sig	0.00010981	0.00095081	0.0012018	0.0012211	0.559833	not_sig	-0.0030252	0.0019149	-0.0014827	0.0016699	0.547636	not_sig
12	112007756	T	C	LDL	-0.027	0.0017	1.885e-54	-0.0198	0.002	4.007e-23	0.001114	not_sig	-0.00694934	0.00292575	-0.00862826	0.00268217	0.669201	not_sig	0.00814001	0.00303324	0.0141712	0.00268852	0.135029	not_sig	-9.2491e-05	0.00095061	-0.00011587	0.0012211	0.992921	not_sig	0.0067471	0.0019144	0.0047867	0.00167	0.48313	not_sig
12	113218868	A	G	LDL	0.0155	0.002	1.506e-14	0.0134	0.0023	4.063e-09	0.4618	not_sig	0.00766416	0.00332607	0.0127637	0.00305152	0.25382	not_sig	-0.00342682	0.00344832	-0.00803932	0.00305881	0.314862	not_sig	0.0009017	0.0010689	0.00043204	0.0013738	0.672361	not_sig	-0.0034597	0.0021528	-0.0038313	0.0018788	0.833922	not_sig
12	121416650	A	C	LDL	0.029	0.0018	6.839e-60	0.0432	0.002	7.77e-102	2.311e-06	sig	0.00278039	0.00317999	-0.00494205	0.00291953	0.0707854	not_sig	0.0031144	0.00329713	-0.0043352	0.00292634	0.0896402	not_sig	-0.00033019	0.0010271	0.00046921	0.0013209	0.62775	not_sig	0.00064355	0.0020686	-0.002795	0.0018065	0.173015	not_sig
12	122380274	A	G	LDL	-0.0122	0.0024	4.021e-07	-0.0122	0.0027	7.676e-06	0.7141	not_sig	-0.00893352	0.00444323	-0.00325323	0.00405863	0.340393	not_sig	0.00649264	0.00460641	-0.00884675	0.00406899	0.0121843	not_sig	0.00083144	0.001442	-4.6126e-05	0.0018446	0.650231	not_sig	-0.0010323	0.0029042	-0.007907	0.0025226	0.0478869	not_sig
12	123856974	A	G	LDL	0.0225	0.0027	2.439e-16	0.0194	0.0033	3.936e-09	0.2155	not_sig	-0.000716287	0.00503748	-0.00165942	0.00464279	0.889407	not_sig	-0.00130723	0.00522263	0.0114666	0.00465426	0.0666465	not_sig	NA	NA	NA	NA	NA	NA	NA	NA	NA	NA	NA	NA
12	124560456	T	G	LDL	-0.0068	0.0017	4.199e-05	-0.0137	0.0019	5.775e-13	0.04156	not_sig	0.00943991	0.00298367	0.00782373	0.00273709	0.686821	not_sig	-0.0138971	0.00309337	-0.0521757	0.00274341	1.41933e-20	sig	-0.0018811	0.00096748	-0.0016739	0.0012429	0.581305	not_sig	0.0006907	0.0019485	-0.0016435	0.0016998	0.328553	not_sig
12	125312425	C	G	LDL	-0.0167	0.0022	1.023e-14	-0.0256	0.0025	9.585e-24	0.2623	not_sig	-0.0050371	0.00418498	0.00705811	0.00383301	0.0313405	not_sig	0.000119928	0.00433892	-0.00697222	0.00384205	0.21902	not_sig	0.0013262	0.0013623	-0.0010506	0.001749	0.252308	not_sig	-0.00060743	0.0027436	-0.00017896	0.0023919	0.904386	not_sig
12	133065832	A	G	LDL	0.0141	0.0025	2.349e-08	0.0181	0.003	8.57e-10	0.3598	not_sig	0.00516722	0.00421918	0.00145466	0.00385499	0.511739	not_sig	-0.00682554	0.00437455	-0.00157103	0.00386418	0.365887	not_sig	-0.001068	0.0013681	-0.0031229	0.0017511	0.534147	not_sig	0.0017969	0.0027554	0.003027	0.0023948	0.691093	not_sig
13	32445660	T	C	LDL	-0.0097	0.0017	2.034e-08	-0.0099	0.002	5.37e-07	0.4606	not_sig	0.00371144	0.00314271	0.00230747	0.00287456	0.739168	not_sig	0.00039311	0.00325618	0.00180611	0.00289128	0.744485	not_sig	-0.00030172	0.0010166	-0.0030125	0.0013033	0.177528	not_sig	-0.0013529	0.0020465	0.00062866	0.0017804	0.438283	not_sig
13	41635301	C	G	LDL	-0.0183	0.0034	5.698e-08	-0.0235	0.0038	8.765e-10	0.3871	not_sig	-0.00426378	0.00558397	-0.00322976	0.0051188	0.89034	not_sig	0.00552307	0.00578569	0.0090097	0.00514983	0.651177	not_sig	-0.0010039	0.0018048	-0.0028173	0.0023198	0.683689	not_sig	-0.0027005	0.0036332	0.0026591	0.003169	0.233864	not_sig
13	50104386	A	G	LDL	-0.0078	0.0016	1.741e-06	-0.0087	0.0019	2.885e-06	0.8948	not_sig	0.00139418	0.00293723	0.00535248	0.00269559	0.315926	not_sig	0.00348514	0.00304344	0.00615295	0.00271116	0.510909	not_sig	-0.0013664	0.00095035	-0.00041777	0.0012222	0.393804	not_sig	-0.00050546	0.0019131	-0.0011476	0.0016696	0.772722	not_sig
13	74748606	A	G	LDL	-0.0111	0.0017	1.604e-10	-0.0077	0.002	8.738e-05	0.08131	not_sig	0.00139047	0.00299864	-0.00497608	0.00274683	0.113805	not_sig	-0.00769276	0.00310683	-0.00107836	0.00276276	0.110052	not_sig	5.9946e-05	0.00095927	-0.00030104	0.0012315	0.830787	not_sig	0.00022669	0.001931	-0.0011436	0.0016823	0.559918	not_sig
13	95226210	C	G	LDL	-0.0118	0.0019	4.823e-10	-0.0157	0.0022	8.682e-13	0.9549	not_sig	-0.0065731	0.00328969	-0.00191899	0.00301452	0.292093	not_sig	-0.00650356	0.00340873	-0.00632903	0.00303218	0.969349	not_sig	0.0015444	0.0010646	0.00052657	0.0013677	0.404446	not_sig	-0.0021014	0.0021432	-0.00038514	0.0018683	0.533672	not_sig
13	111039070	A	G	LDL	0.0158	0.0017	2.083e-20	0.0151	0.0019	7.17e-15	0.39	not_sig	-0.00310561	0.00305146	-0.00251731	0.00279313	0.885784	not_sig	0.0205505	0.00316163	0.0101906	0.00280926	0.0138819	not_sig	0.0003713	0.00098278	-0.0021206	0.0012609	0.152576	not_sig	0.00035227	0.0019784	-0.0016488	0.0017225	0.406137	not_sig
13	114551993	T	C	LDL	0.0192	0.0018	8.883e-28	0.0244	0.002	2.439e-33	0.2353	not_sig	-0.00201132	0.00313276	-0.00470766	0.00287369	0.521759	not_sig	0.00373659	0.00324592	0.00100438	0.00289023	0.527767	not_sig	-0.00060968	0.0010133	0.0004345	0.0013026	0.495392	not_sig	0.0011206	0.0020398	0.00022399	0.0017794	0.73305	not_sig
14	21492229	A	G	LDL	0.0315	0.0072	1.123e-05	0.0426	0.0079	7.343e-08	0.3614	not_sig	0.0063196	0.0151157	-0.0150769	0.0140889	0.29561	not_sig	0.0245582	0.0156505	-0.0209663	0.0141557	0.030248	not_sig	-0.0047756	0.0047088	0.0078246	0.0061895	0.103017	not_sig	0.011133	0.0094813	-0.0029912	0.0084574	0.241009	not_sig
14	24871926	T	C	LDL	-0.0186	0.0017	7.728e-27	-0.0284	0.002	3.702e-45	0.02982	not_sig	-0.00300893	0.00297716	0.000269018	0.00274262	0.413395	not_sig	0.00704608	0.00308451	-0.00365452	0.00275689	0.00937703	not_sig	-0.00026657	0.00095675	-0.00015057	0.0012352	0.899127	not_sig	-0.0017697	0.0019264	-0.0029876	0.0016877	0.575129	not_sig
14	31735087	T	G	LDL	0.0177	0.0038	3.44e-06	0.0231	0.0046	5.154e-07	0.4499	not_sig	-0.0100879	0.010748	-0.00910026	0.00986475	0.945484	not_sig	-0.0255259	0.0111392	0.00628586	0.00991831	0.0321695	not_sig	-0.0013316	0.0034699	0.0047277	0.0044693	0.311893	not_sig	-0.0052429	0.0069867	0.0033351	0.0061069	0.324927	not_sig
14	35186694	T	C	LDL	0.0104	0.0018	1.167e-08	0.0132	0.0021	3.864e-10	0.607	not_sig	0.00643245	0.00333236	-0.000709287	0.00306274	0.110984	not_sig	-0.00324193	0.0034522	0.000423372	0.00307901	0.426113	not_sig	0.00072267	0.0010731	0.0018793	0.0013816	0.674871	not_sig	-0.0027713	0.0021607	-0.0014912	0.0018878	0.662213	not_sig
14	64233980	T	C	LDL	-0.013	0.0022	4.919e-09	-0.0176	0.0026	8.607e-12	0.05418	not_sig	-0.00118983	0.00399671	-0.00223896	0.00368734	0.845494	not_sig	-0.00357753	0.00414092	0.0032111	0.00370653	0.21985	not_sig	-0.0016699	0.0012927	0.0012565	0.001671	0.136946	not_sig	0.00056635	0.0026028	-0.00082061	0.0022832	0.666446	not_sig
14	70857022	T	C	LDL	-0.0282	0.0024	1.47e-31	-0.0214	0.0027	7.868e-15	0.007797	not_sig	-0.00305992	0.00424022	0.00179759	0.00388232	0.393431	not_sig	0.00630242	0.0043925	-0.000507986	0.00390265	0.244351	not_sig	-0.001045	0.0013715	0.00047972	0.0017606	0.446425	not_sig	-0.0030279	0.0027615	-0.00047588	0.0024057	0.471552	not_sig
14	74250126	T	C	LDL	-0.0156	0.0018	1.225e-17	-0.019	0.0021	5.85e-19	0.3123	not_sig	NA	NA	NA	NA	NA	NA	NA	NA	NA	NA	NA	NA	-0.00055863	0.0010752	0.00097946	0.0013856	0.381916	not_sig	-0.0041827	0.0021649	-1.0708e-05	0.0018933	0.130177	not_sig
14	75327443	T	C	LDL	0.0092	0.0017	3.163e-08	0.0106	0.0019	2.968e-08	0.8419	not_sig	-0.00131452	0.0030033	0.00140951	0.00276214	0.500114	not_sig	0.00356205	0.00311179	-0.00578133	0.00277639	0.0244274	not_sig	0.0017203	0.0009702	0.0006485	0.0012507	0.325288	not_sig	-0.0060772	0.0019535	-0.0019509	0.001709	0.10581	not_sig
14	90058243	A	G	LDL	0.0058	0.0017	0.0008917	0.014	0.002	1.489e-12	0.004263	not_sig	-0.00816427	0.0030567	0.00286313	0.00281182	0.00732269	not_sig	-0.00145274	0.00316701	0.00654675	0.00282639	0.0583772	not_sig	0.00092874	0.00098345	-0.0013695	0.001268	0.147179	not_sig	-0.00047903	0.0019802	-0.0052069	0.0017326	0.047252	not_sig
14	94847262	A	T	LDL	-0.0439	0.0045	1.916e-22	-0.0582	0.0052	9.898e-29	0.001737	not_sig	0.00559733	0.00684775	-0.00256153	0.00630938	0.376132	not_sig	0.00576828	0.00709446	0.00794628	0.00634115	0.818166	not_sig	0.0022471	0.0022165	0.0016045	0.0028593	0.702933	not_sig	0.0020076	0.0044629	-0.00043795	0.003907	0.664093	not_sig
14	102622225	T	C	LDL	-0.012	0.002	1.525e-09	-0.0093	0.0023	5.417e-05	0.1655	not_sig	0.00486267	0.00363344	0.00867353	0.00332583	0.434546	not_sig	-0.000550049	0.00376486	-0.00135768	0.00334415	0.872021	not_sig	-0.0011458	0.0011757	-0.0013082	0.0015081	0.883646	not_sig	0.0020826	0.0023672	-0.0012264	0.0020607	0.261962	not_sig
15	49336477	A	T	LDL	0.0116	0.0018	4.644e-11	0.0156	0.002	2.282e-15	0.3169	not_sig	0.0080612	0.00302502	0.00165345	0.0027755	0.114909	not_sig	-0.00499746	0.00313212	0.00464136	0.00278964	0.0209872	not_sig	0.0013106	0.00097799	8.064e-05	0.0012573	0.332836	not_sig	0.0010278	0.0019683	0.0046683	0.0017172	0.120448	not_sig
15	53096084	C	G	LDL	-0.0158	0.0024	2.004e-11	-0.0116	0.0027	1.476e-05	0.5188	not_sig	0.00933229	0.00430994	0.00682626	0.00396633	0.66563	not_sig	0.00308342	0.00446301	0.00158675	0.00398654	0.801654	not_sig	0.0014999	0.0013843	-0.00054033	0.0017845	0.305833	not_sig	0.0025968	0.002786	0.0058279	0.0024373	0.31846	not_sig
15	53739426	A	C	LDL	-0.0782	0.0069	4.71e-30	-0.0495	0.0075	3.522e-11	0.001257	not_sig	0.0037002	0.0129506	-0.00500505	0.0117653	0.615296	not_sig	-0.0160799	0.013411	0.0246644	0.0118266	0.0220963	not_sig	0.0069891	0.0041349	0.0036044	0.005269	0.413521	not_sig	0.009308	0.0083217	0.0027283	0.0071968	0.541555	not_sig
15	57297078	A	T	LDL	0.0246	0.0035	1.614e-12	0.0356	0.0038	1.437e-20	0.07822	not_sig	0.0190297	0.00564469	0.0193285	0.0052069	0.968651	not_sig	0.00441282	0.00584478	0.0103739	0.00523238	0.445318	not_sig	0.00041795	0.0018238	0.00055016	0.002357	0.989518	not_sig	0.0075429	0.0036705	0.003784	0.0032194	0.446938	not_sig
15	58722590	G	GC	LDL	0.0155	0.002	1.805e-14	0.0098	0.0025	6.804e-05	0.0002602	not_sig	-0.00308607	0.00362161	0.000803604	0.00332467	0.424208	not_sig	-0.0104805	0.00374936	-0.00394571	0.00334136	0.191237	not_sig	NA	NA	NA	NA	NA	NA	NA	NA	NA	NA	NA	NA
15	63788267	T	C	LDL	0.0125	0.0019	5.927e-11	0.0157	0.0022	5.47e-13	0.5165	not_sig	-0.00783459	0.00330091	-0.0135478	0.00302671	0.197565	not_sig	0.00551987	0.00341754	0.0121386	0.00304174	0.146206	not_sig	-0.0024188	0.0010546	0.0011126	0.0013543	0.0218684	not_sig	0.0051233	0.0021224	-0.00084472	0.0018498	0.0258446	not_sig
15	67428014	A	C	LDL	-0.0076	0.0019	4.915e-05	-0.0104	0.0022	1.893e-06	0.4992	not_sig	0.0123319	0.00363876	0.00222286	0.00332888	0.0384155	not_sig	0.00130401	0.00376808	-0.00352613	0.0033463	0.335701	not_sig	0.0016491	0.0011801	0.00203	0.0015129	0.88573	not_sig	-0.0037347	0.0023749	-8.9138e-05	0.0020664	0.227477	not_sig
15	75116167	T	C	LDL	-0.0105	0.0017	1.756e-09	-0.0141	0.002	1.591e-12	0.1747	not_sig	-0.0149577	0.0030197	-0.00939189	0.00276028	0.169407	not_sig	-0.00414214	0.00312604	-0.00444829	0.00277417	0.94135	not_sig	-0.0016742	0.00097211	-0.00087728	0.0012454	0.410155	not_sig	0.0028454	0.0019564	0.0038441	0.0017011	0.628529	not_sig
15	102068658	A	G	LDL	0.013	0.0019	2.668e-12	0.0066	0.0022	0.002287	0.06237	not_sig	-0.00267319	0.00338397	-0.00116561	0.00310659	0.74028	not_sig	-0.000706916	0.00350338	-0.00626434	0.00312213	0.234243	not_sig	-7.5851e-05	0.0010926	0.0018773	0.0014051	0.335483	not_sig	0.001226	0.0021988	-0.0040267	0.0019191	0.050686	not_sig
16	11706100	A	G	LDL	-0.024	0.0031	7.477e-15	-0.0348	0.0033	2.382e-25	0.0545	not_sig	0.00121979	0.00569238	-0.0157007	0.0051975	0.0266115	not_sig	-0.0168604	0.00591011	0.00081452	0.00522839	0.0244611	not_sig	0.0021862	0.0018258	-0.0007785	0.002337	0.257387	not_sig	0.0010798	0.0036767	0.0080373	0.0031927	0.113622	not_sig
16	31021880	T	G	LDL	-0.0112	0.0018	5.001e-10	-0.0168	0.0022	3.535e-14	0.1291	not_sig	-0.00715782	0.00309089	-0.0172609	0.00283586	0.0149854	not_sig	0.00217377	0.00320922	0.00127829	0.00285273	0.834081	not_sig	NA	NA	NA	NA	NA	NA	NA	NA	NA	NA	NA	NA
16	55870239	T	G	LDL	0.0224	0.0042	9.531e-08	0.0249	0.0048	2.02e-07	0.5955	not_sig	0.00596403	0.00803398	-0.00812782	0.00732299	0.190418	not_sig	-0.0111021	0.00834169	0.0112496	0.00736829	0.0436843	not_sig	0.00090361	0.0025807	-0.00030845	0.0032904	0.742142	not_sig	0.0026289	0.0051969	0.00047187	0.0044951	0.746064	not_sig
16	56990716	A	C	LDL	0.0157	0.0018	4.356e-19	0.0557	0.002	7.84e-167	1.102e-29	sig	0.0056911	0.00312689	0.0027456	0.00287235	0.483491	not_sig	-0.000398934	0.00324625	0.00882172	0.0028895	0.0330868	not_sig	0.00047263	0.0010164	0.0013703	0.0013082	0.71638	not_sig	-0.0013876	0.0020468	0.0044901	0.0017871	0.0188586	not_sig
16	69527385	A	G	LDL	0.0144	0.004	0.0002973	0.0213	0.0044	1.638e-06	0.5077	not_sig	-0.0138302	0.00639753	0.00175477	0.00587794	0.0699988	not_sig	-0.00738263	0.00664251	-0.0021116	0.00591196	0.551592	not_sig	-0.0012337	0.002035	-0.001739	0.0026195	0.996118	not_sig	-0.012231	0.0040979	-0.0035823	0.0035786	0.104711	not_sig
16	70375296	A	G	LDL	-0.0218	0.0041	9.746e-08	-0.0241	0.0045	1.003e-07	0.656	not_sig	NA	NA	NA	NA	NA	NA	NA	NA	NA	NA	NA	NA	-0.00076211	0.0020155	0.0027494	0.0026074	0.314466	not_sig	0.014705	0.0040586	0.0088329	0.003562	0.296331	not_sig
16	72079657	T	C	LDL	0.0419	0.0021	1.282e-87	0.0468	0.0024	2.849e-86	0.9384	not_sig	0.0021426	0.00371637	0.00577151	0.00341867	0.467915	not_sig	0.00240902	0.00385777	-0.000957221	0.00343877	0.512953	not_sig	0.0015465	0.001203	0.0011486	0.0015504	0.642457	not_sig	0.00020698	0.0024225	0.0028698	0.0021181	0.361434	not_sig
16	73101013	A	G	LDL	-0.0121	0.002	6.043e-10	-0.0082	0.0022	0.0002148	0.1013	not_sig	0.0113697	0.00341877	0.003287	0.00313051	0.07821	not_sig	-0.00159081	0.0035489	0.00647877	0.00314916	0.0875858	not_sig	-0.00027605	0.0010958	-0.0030829	0.0014063	0.192863	not_sig	0.0056789	0.0022067	0.0044085	0.0019212	0.711408	not_sig
16	79363079	A	C	LDL	0.0096	0.0017	2.125e-08	0.0085	0.0019	1.365e-05	0.1769	not_sig	-0.00281592	0.00305702	-8.61178e-05	0.00280772	0.506513	not_sig	0.00217895	0.00317386	-0.00359155	0.00282465	0.172519	not_sig	0.00015676	0.0009861	-0.00020297	0.0012684	0.818773	not_sig	-0.0004371	0.0019858	-0.0010853	0.0017328	0.779972	not_sig
16	83979317	T	C	LDL	-0.0196	0.0018	7.04e-29	-0.0178	0.002	2.583e-18	0.869	not_sig	0.00774976	0.00302267	0.00792804	0.0027777	0.965012	not_sig	-0.00267593	0.00313838	-0.000146361	0.00279454	0.545436	not_sig	-0.00068693	0.00097999	0.00019988	0.0012615	0.52402	not_sig	-0.0012338	0.0019735	-0.0007472	0.0017233	0.858675	not_sig
16	88567333	T	C	LDL	-0.0242	0.0031	4.853e-15	-0.0225	0.0036	2.749e-10	0.7487	not_sig	-0.0113946	0.00552969	-0.00964516	0.00507579	0.813888	not_sig	0.00518834	0.00573991	0.00441814	0.0051064	0.919792	not_sig	-0.0023131	0.0017769	0.0022237	0.0022827	0.0995328	not_sig	0.0050196	0.0035783	-0.0051246	0.0031185	0.0220382	not_sig
17	1958609	T	C	LDL	-0.0108	0.0017	4.62e-10	-0.0079	0.002	5.884e-05	0.4283	not_sig	-0.00458024	0.0030952	-0.0024215	0.00284081	0.603762	not_sig	-0.00153561	0.0032044	0.00188065	0.00284986	0.423621	not_sig	0.00092921	0.00099439	0.0029059	0.0012801	0.399297	not_sig	0.0048612	0.0020017	0.0090663	0.0017492	0.0659533	not_sig
17	4676420	A	G	LDL	-0.0161	0.0018	8.815e-19	-0.0124	0.0021	2.645e-09	0.2304	not_sig	-0.0020054	0.00308926	-0.00164839	0.00282768	0.931385	not_sig	0.00562426	0.00319796	-0.000919178	0.00283686	0.12419	not_sig	0.00064423	0.00099597	-0.00046071	0.0012788	0.462849	not_sig	9.1084e-05	0.0020049	-0.0010258	0.0017474	0.645875	not_sig
17	5270010	A	G	LDL	0.0569	0.0128	8.29e-06	0.0764	0.0143	8.863e-08	0.6905	not_sig	0.0297078	0.0206223	-0.0109161	0.0199379	0.152569	not_sig	-0.00811251	0.0213392	0.00620954	0.0199953	0.622771	not_sig	0.0051708	0.0066502	-0.0040429	0.0090231	0.374971	not_sig	-0.0090508	0.013387	-0.012728	0.01233	0.803271	not_sig
17	7069412	A	G	LDL	0.3029	0.014	1.8e-103	0.3196	0.0149	8.81e-102	0.3072	not_sig	-0.0399816	0.0222036	-0.000893378	0.0207029	0.193418	not_sig	-0.020483	0.0229791	-0.0223182	0.0207667	0.952542	not_sig	NA	NA	NA	NA	NA	NA	NA	NA	NA	NA	NA	NA
17	7571080	A	G	LDL	-0.017	0.0024	2.157e-12	-0.0179	0.0028	8.344e-11	0.9581	not_sig	0.00234878	0.00416055	0.00801457	0.00381886	0.310903	not_sig	-0.0135836	0.00430772	-0.0108029	0.00383205	0.628082	not_sig	-0.0024663	0.0013204	0.00017623	0.0016995	0.138689	not_sig	0.00091681	0.0026579	0.000756	0.0023223	0.971502	not_sig
17	8214427	A	G	LDL	-0.0154	0.0017	9.047e-21	-0.0113	0.0019	2.499e-09	0.01863	not_sig	0.00618867	0.00294231	0.00966631	0.00269535	0.3787	not_sig	-1.37001e-05	0.00304628	-0.0152445	0.00270393	0.000172815	not_sig	0.00011162	0.00095029	-0.00093425	0.0012208	0.541812	not_sig	0.004116	0.0019129	0.0010845	0.0016682	0.221427	not_sig
17	9791780	A	T	LDL	-0.0089	0.0019	2.238e-06	-0.0103	0.0021	1.657e-06	0.5575	not_sig	-0.0129032	0.00312353	-0.00764408	0.00286038	0.209769	not_sig	-0.01194	0.00323365	-0.00337957	0.00286976	0.046729	not_sig	0.00035454	0.001009	-0.0013688	0.0012953	0.324545	not_sig	0.0041029	0.0020311	0.0010958	0.00177	0.253338	not_sig
17	18116455	T	C	LDL	-0.0156	0.0022	2.269e-12	-0.0111	0.0025	1.006e-05	0.3023	not_sig	-0.000223539	0.00379218	0.00466919	0.00348724	0.337431	not_sig	0.00279537	0.00392614	-0.0168898	0.00349825	0.000169921	not_sig	-0.00078904	0.0012232	0.00020798	0.001577	0.564212	not_sig	-0.0019575	0.0024623	0.0017482	0.002155	0.225847	not_sig
17	18679442	A	G	LDL	-0.0095	0.0018	2.155e-07	-0.0089	0.0021	1.814e-05	0.9489	not_sig	0.00521589	0.00327181	0.0058261	0.00300794	0.889703	not_sig	0.00315394	0.00338747	0.00290956	0.00301772	0.956851	not_sig	0.0012494	0.0010575	0.00080355	0.0013635	0.624934	not_sig	0.0026206	0.0021288	-0.00026372	0.0018632	0.285094	not_sig
17	26694861	A	G	LDL	-0.0205	0.0016	2.466e-36	-0.0187	0.0019	3.996e-23	0.2587	not_sig	-0.00417384	0.00293208	-0.00421634	0.00268962	0.991392	not_sig	0.000601063	0.00303562	0.00714469	0.00269824	0.105606	not_sig	0.0005644	0.00095097	0.0019157	0.001223	0.535557	not_sig	-0.0011953	0.0019143	0.00082982	0.0016711	0.395548	not_sig
17	28583498	C	G	LDL	-0.0193	0.004	1.31e-06	-0.0222	0.004	2.515e-08	0.8144	not_sig	-0.0135465	0.00547623	-0.0113306	0.00503451	0.763506	not_sig	-0.0066253	0.00567065	-0.00252229	0.00505111	0.587353	not_sig	-0.0026963	0.0017446	-0.0032563	0.0022439	0.858897	not_sig	-0.010863	0.0035119	0.0020554	0.0030661	0.00354862	not_sig
17	29413614	A	G	LDL	-0.0169	0.0019	9.052e-19	-0.0196	0.0021	4.89e-21	0.2173	not_sig	0.00554735	0.00319518	0.00684842	0.00293052	0.761807	not_sig	-0.00362212	0.00330779	-0.0157945	0.00294	0.00573346	not_sig	-0.0011525	0.0010327	-0.0022851	0.0013281	0.741348	not_sig	-0.0029554	0.0020789	-0.0018797	0.0018148	0.712003	not_sig
17	37070737	A	G	LDL	-0.0106	0.0017	1.053e-09	-0.0102	0.002	2.361e-07	0.6673	not_sig	-0.00090703	0.00311392	-0.000813928	0.00285454	0.98224	not_sig	-0.0065203	0.00322379	0.00217422	0.00286371	0.0428431	not_sig	-0.0014868	0.0010029	0.00017053	0.0012898	0.226425	not_sig	0.0018233	0.0020188	-0.0018911	0.0017624	0.137488	not_sig
17	37970365	T	C	LDL	0.0171	0.0029	3.543e-09	0.0126	0.0034	0.0002173	0.08623	not_sig	0.00961367	0.00550121	0.00579619	0.00504133	0.605333	not_sig	-0.00331524	0.00569466	-0.0122904	0.00505765	0.236569	not_sig	0.0034882	0.0017728	-0.00071509	0.0022795	0.0891735	not_sig	-0.00026523	0.0035687	0.00080658	0.0031149	0.806073	not_sig
17	40546652	A	G	LDL	0.0079	0.0018	8.286e-06	0.0107	0.002	6.611e-08	0.6274	not_sig	NA	NA	NA	NA	NA	NA	NA	NA	NA	NA	NA	NA	-0.0010855	0.00096899	-0.0015537	0.0012453	0.996875	not_sig	0.0010273	0.0019506	0.00017013	0.0017017	0.732421	not_sig
17	41926126	T	C	LDL	0.0419	0.0051	1.817e-16	0.0198	0.0059	0.000757	0.134	not_sig	0.0073565	0.00842642	0.0185777	0.00767241	0.319957	not_sig	-0.00671985	0.00872567	-0.0116038	0.00770013	0.67337	not_sig	-0.0034351	0.0027242	-0.0011531	0.0034809	0.465418	not_sig	0.0052808	0.0054838	-0.004844	0.0047565	0.135605	not_sig
17	45732605	A	G	LDL	0.0221	0.0016	8.186e-42	0.0344	0.0019	7.275e-76	9.378e-06	sig	-0.000675481	0.00293675	-0.00578272	0.00268968	0.195193	not_sig	-0.000287874	0.00304036	0.00714578	0.00269858	0.0662598	not_sig	0.0017609	0.00094873	0.0037532	0.0012183	0.486634	not_sig	-0.0019816	0.0019098	-0.0034942	0.0016648	0.484504	not_sig
17	46657927	A	G	LDL	-0.0129	0.0017	4.166e-14	-0.0169	0.0019	4.335e-18	0.08174	not_sig	-0.00584149	0.00309403	-0.0052547	0.00283634	0.887708	not_sig	-0.00740119	0.00320298	-0.00951895	0.0028457	0.619567	not_sig	-0.0017	0.00099957	0.00043916	0.0012853	0.129198	not_sig	0.0011944	0.0020122	0.0026077	0.0017563	0.544506	not_sig
17	57926911	T	C	LDL	-0.0139	0.0017	8.323e-17	-0.0072	0.0019	0.0001398	0.0069	not_sig	0.00307703	0.00294272	0.00837846	0.00270242	0.180165	not_sig	-0.00845731	0.00304649	0.00253513	0.00271109	0.00678202	not_sig	-0.0024895	0.00095077	-0.0023527	0.001224	0.505793	not_sig	-0.0023887	0.001914	-0.0011402	0.0016726	0.625715	not_sig
17	64210580	A	C	LDL	0.0868	0.0053	6.744e-60	0.0928	0.0063	4.117e-49	0.6393	not_sig	-0.00592641	0.00854226	-0.0047396	0.00786429	0.917771	not_sig	-0.00600315	0.0088435	0.012378	0.0078894	0.119269	not_sig	-0.0071197	0.0027644	0.00087168	0.0035685	0.0349911	not_sig	0.0018396	0.0055649	-0.0031521	0.0048762	0.466974	not_sig
17	65140921	A	C	LDL	0.0144	0.0017	3.601e-18	0.0096	0.0019	5.006e-07	0.08315	not_sig	-0.00532141	0.00294232	0.000155755	0.00269972	0.165928	not_sig	0.00299059	0.00304583	0.00692814	0.00270857	0.331893	not_sig	0.0004775	0.00095093	0.00042506	0.0012236	0.886894	not_sig	-0.0025297	0.0019142	0.005426	0.001672	0.000714493	not_sig
17	65839210	A	G	LDL	0.013	0.002	1.816e-10	0.0178	0.0023	1.851e-14	0.1421	not_sig	0.0168814	0.00370077	0.0192663	0.0033924	0.631355	not_sig	0.00388437	0.00383139	0.0120631	0.00340333	0.108935	not_sig	-0.0032962	0.001196	-0.0030473	0.0015377	0.464889	not_sig	0.0064695	0.0024076	0.0035103	0.0021013	0.365114	not_sig
17	66394054	T	C	LDL	0.0135	0.0021	6.075e-11	0.0124	0.0023	7.577e-08	0.7079	not_sig	0.00977572	0.00348118	-0.00592923	0.00319091	0.000781975	not_sig	-0.00430886	0.00360386	-0.00265944	0.00320104	0.731073	not_sig	-0.00091179	0.0011189	0.0018358	0.0014373	0.137342	not_sig	-0.0013955	0.0022524	-0.0013318	0.0019641	0.99813	not_sig
17	67081278	A	G	LDL	0.1789	0.0065	9.88e-167	0.182	0.0073	2.29e-136	0.9726	not_sig	-0.00841946	0.00984063	-0.00302629	0.00901642	0.683167	not_sig	-0.0316987	0.0101868	-0.0280287	0.00904632	0.786721	not_sig	0.0020228	0.0032436	-0.00020332	0.0041736	0.614235	not_sig	0.0050695	0.0065294	-0.0010416	0.005703	0.457988	not_sig
17	68169005	A	G	LDL	0.0123	0.0025	1.443e-06	0.0168	0.0029	4.515e-09	0.4306	not_sig	-0.00559068	0.0046088	-0.00674197	0.00421681	0.852325	not_sig	0.00720774	0.00477103	0.0165874	0.00423026	0.139542	not_sig	-0.0010517	0.0014831	-0.00016287	0.001904	0.632893	not_sig	-0.0033831	0.0029854	-0.0010812	0.0026017	0.554179	not_sig
17	73767437	A	G	LDL	0.0184	0.0018	9.346e-24	0.0174	0.0021	1.416e-16	0.2604	not_sig	-0.0110162	0.00325656	-0.0079711	0.00298831	0.486502	not_sig	-0.000700597	0.00337158	0.0101254	0.00299762	0.0159413	not_sig	-0.00051985	0.0010517	0.002427	0.0013538	0.110547	not_sig	-0.0043484	0.002117	-0.00057549	0.00185	0.164838	not_sig
17	76387363	T	G	LDL	-0.0193	0.0017	2.118e-31	-0.0169	0.0019	8.583e-19	0.1032	not_sig	0.00264064	0.0029868	0.00601299	0.00274192	0.400845	not_sig	0.00283768	0.00309223	-0.00193851	0.0027507	0.246397	not_sig	-0.00026667	0.00095748	-0.0010185	0.0012323	0.723811	not_sig	0.0016616	0.0019274	0.0014301	0.0016839	0.949324	not_sig
18	9545961	T	C	LDL	-0.0106	0.0021	3.811e-07	-0.0132	0.0024	3.305e-08	0.6367	not_sig	0.00629814	0.00368138	0.00508514	0.00338177	0.806384	not_sig	-0.00056016	0.00381559	-0.00257865	0.00340123	0.691634	not_sig	-0.0014929	0.0011876	-0.00026334	0.0015311	0.406074	not_sig	0.0013645	0.0023904	0.0045209	0.002091	0.264619	not_sig
18	46545976	C	G	LDL	-0.0655	0.0093	1.739e-12	-0.0422	0.0106	7.098e-05	0.01992	not_sig	0.00519086	0.0156848	-0.00188346	0.0143271	0.736599	not_sig	-0.0312171	0.0162565	-0.031909	0.0144142	0.974483	not_sig	NA	NA	NA	NA	NA	NA	NA	NA	NA	NA	NA	NA
18	47109955	A	G	LDL	0.0767	0.0078	1.156e-22	0.0629	0.0089	1.955e-12	0.2491	not_sig	0.00220521	0.0126616	-0.00746314	0.0117462	0.571779	not_sig	0.0120907	0.013121	0.00274916	0.0118132	0.595112	not_sig	-0.00048761	0.0040934	0.0040823	0.0053374	0.538744	not_sig	0.00095172	0.008239	0.0015443	0.0072889	0.94902	not_sig
18	55322502	T	C	LDL	-0.0113	0.0026	1.871e-05	-0.0178	0.003	2.532e-09	0.1675	not_sig	0.0129824	0.0044425	0.00347645	0.00408051	0.111444	not_sig	0.00474024	0.00460453	0.00552336	0.00410477	0.898533	not_sig	0.00096679	0.0014373	-0.00081873	0.0018517	0.418386	not_sig	-0.0030573	0.0028929	-0.00050375	0.0025288	0.492581	not_sig
18	61034420	T	G	LDL	-0.0088	0.002	1.343e-05	-0.0115	0.0023	9.448e-07	0.4293	not_sig	0.00288651	0.00361293	-0.00452337	0.00331927	0.127136	not_sig	-0.00398191	0.00374537	0.00838269	0.00333818	0.0133096	not_sig	0.00027678	0.0011655	0.0021025	0.0015014	0.437612	not_sig	0.0071045	0.0023459	0.0025936	0.0020504	0.142983	not_sig
18	77825981	A	G	LDL	0.0094	0.0018	3.488e-07	0.0088	0.0021	2.982e-05	0.343	not_sig	0.00568855	0.00326877	0.00134388	0.00300061	0.322665	not_sig	-0.00197957	0.00338807	0.00185518	0.00301814	0.395954	not_sig	-0.00088198	0.0010575	0.0013106	0.0013612	0.198378	not_sig	-0.00053975	0.0021285	0.0019942	0.0018589	0.329779	not_sig
19	795816	A	G	LDL	-0.0145	0.0024	1.269e-09	-0.0116	0.0028	3.151e-05	0.5152	not_sig	-0.00587778	0.00424547	0.00148989	0.00389315	0.196389	not_sig	0.0113645	0.00439066	0.0042122	0.0039074	0.221611	not_sig	0.00057043	0.0013771	-0.0014308	0.0017718	0.387958	not_sig	0.00066637	0.0027695	-0.0046865	0.0024189	0.111997	not_sig
19	2789337	T	C	LDL	0.0172	0.0019	2.7e-20	0.0141	0.0021	1.309e-11	0.1881	not_sig	-0.00458496	0.0032582	-0.00511518	0.00299076	0.903619	not_sig	0.000306842	0.00337026	0.000209341	0.00300187	0.982689	not_sig	-0.00021503	0.0010492	-0.0005623	0.0013495	0.89713	not_sig	-0.00018182	0.0021101	6.0161e-06	0.0018423	0.944123	not_sig
19	4478062	A	G	LDL	-0.0135	0.0017	2.093e-15	-0.009	0.002	5.707e-06	0.02351	not_sig	0.00219447	0.0030277	-0.00286115	0.00277757	0.213934	not_sig	-0.00242404	0.00313232	0.0117864	0.00278793	0.000664595	not_sig	-0.00037685	0.00097838	-0.0012583	0.0012588	0.695997	not_sig	-0.0011787	0.0019677	-0.0025596	0.0017185	0.544785	not_sig
19	5840926	A	C	LDL	-0.0186	0.0026	6.778e-13	-0.0152	0.0031	6.248e-07	0.1521	not_sig	0.00111124	0.00570019	0.00268426	0.00519625	0.8368	not_sig	0.00238055	0.00589719	0.00186346	0.00521498	0.947398	not_sig	0.00085262	0.0018305	0.0018607	0.0023393	0.851219	not_sig	0.0031508	0.0036814	0.0049327	0.0031936	0.661819	not_sig
19	8022788	T	C	LDL	0.0253	0.0217	0.2437	0.0189	0.0328	0.5649	0.7693	not_sig	NA	NA	NA	NA	NA	NA	NA	NA	NA	NA	NA	NA	NA	NA	NA	NA	NA	NA	NA	NA	NA	NA	NA	NA
19	9901805	A	G	LDL	0.2247	0.0394	1.203e-08	0.2293	0.048	1.815e-06	0.7242	not_sig	NA	NA	NA	NA	NA	NA	NA	NA	NA	NA	NA	NA	NA	NA	NA	NA	NA	NA	NA	NA	NA	NA	NA	NA
19	11197598	T	G	LDL	0.1976	0.0026	1.26e-1258	0.2364	0.0031	1.58e-1303	1.321e-07	sig	-0.00441262	0.00454195	-0.00615199	0.00417229	0.775751	not_sig	-0.00327622	0.00469853	-0.0051054	0.00418816	0.770365	not_sig	0.00010154	0.0014658	0.0043633	0.0018885	0.127456	not_sig	0.0019276	0.002948	-0.0028894	0.0025782	0.185478	not_sig
19	12784944	T	C	LDL	0.2972	0.0518	9.903e-09	0.3571	0.0452	2.916e-15	0.6706	not_sig	-0.165698	0.144082	-0.256713	0.129648	0.635297	not_sig	-0.462077	0.149084	0.0513242	0.130135	0.00916659	not_sig	NA	NA	NA	NA	NA	NA	NA	NA	NA	NA	NA	NA
19	13295968	T	C	LDL	0.261	0.0476	4.167e-08	0.2646	0.041	1.041e-10	0.701	not_sig	0.0645225	0.0873632	-0.0508297	0.0707625	0.300132	not_sig	-0.015106	0.0900125	-0.0293191	0.0710283	0.900925	not_sig	NA	NA	NA	NA	NA	NA	NA	NA	NA	NA	NA	NA
19	14172728	T	C	LDL	0.0083	0.0018	3.198e-06	0.0132	0.0021	2.62e-10	0.09686	not_sig	-0.00274655	0.00305022	0.00384227	0.002801	0.108045	not_sig	-4.90797e-05	0.00315511	-0.00236944	0.0028114	0.581292	not_sig	0.0013396	0.00097386	0.0031262	0.0012541	0.507773	not_sig	0.0022192	0.0019586	0.00031564	0.0017121	0.449155	not_sig
19	15796507	A	G	LDL	0.0095	0.0016	7.589e-09	0.0108	0.0019	9.217e-09	0.923	not_sig	0.00033147	0.00294034	-0.00267347	0.00269403	0.446605	not_sig	-0.00129298	0.00304163	-0.000776746	0.0027038	0.898616	not_sig	0.0002339	0.00094935	-0.00032151	0.00122	0.714607	not_sig	-0.0018456	0.0019093	0.00082775	0.0016655	0.263124	not_sig
19	16404594	T	C	LDL	-0.1569	0.069	0.023	-0.0827	0.064	0.1959	0.7585	not_sig	-0.113721	0.0685679	0.169173	0.0659417	0.002667	not_sig	0.0694272	0.0709484	-0.0265862	0.0661894	0.320264	not_sig	NA	NA	NA	NA	NA	NA	NA	NA	NA	NA	NA	NA
19	17527370	A	G	LDL	0.0124	0.0021	1.926e-09	0.0137	0.0024	6.232e-09	0.8632	not_sig	0.00185747	0.0039032	0.00148348	0.00357523	0.943107	not_sig	-0.00148149	0.00403832	-0.00525071	0.00358815	0.483422	not_sig	0.0018158	0.0012572	-0.00029849	0.0016148	0.22353	not_sig	0.0010385	0.0025283	-0.0030204	0.0022045	0.189417	not_sig
19	18335715	C	G	LDL	-0.0088	0.0019	6.269e-06	-0.0198	0.0022	2.652e-19	0.01934	not_sig	-0.0155507	0.00330151	-0.013988	0.00303339	0.724799	not_sig	-0.0188682	0.00341568	-0.019582	0.00304426	0.875484	not_sig	-0.00081913	0.0010658	-0.002322	0.0013726	0.565962	not_sig	-0.00086825	0.0021434	0.0018294	0.0018739	0.305778	not_sig
19	19379549	T	C	LDL	0.1326	0.0032	3.56e-384	0.0711	0.0036	1.511e-87	8.007e-45	sig	0.00933707	0.0055732	0.00150226	0.00511445	0.295479	not_sig	-0.0134444	0.00576537	-0.0281186	0.00513412	0.0562376	not_sig	0.00040742	0.0018009	-0.00022644	0.0023155	0.812264	not_sig	0.0006076	0.0036218	-0.00025435	0.0031612	0.849302	not_sig
19	33864260	A	G	LDL	0.0327	0.0051	1.95e-10	0.0213	0.0059	0.0002799	0.2985	not_sig	-0.000983138	0.00890785	0.00360716	0.00817782	0.70141	not_sig	-0.00489235	0.00921154	-0.0064054	0.00820904	0.901973	not_sig	0.0022455	0.0028639	-0.0080371	0.0036869	0.0376563	not_sig	0.00012215	0.0057597	-0.0058865	0.0050335	0.388633	not_sig
19	36038390	A	G	LDL	-0.0063	0.0017	0.0001718	-0.0123	0.0019	2.673e-10	0.3665	not_sig	0.00184046	0.00303856	0.00146553	0.00278844	0.926836	not_sig	-0.00220923	0.00314335	0.00232921	0.00279875	0.278767	not_sig	0.00095173	0.00098388	-0.0025218	0.0012655	0.0367202	not_sig	-0.00047841	0.0019787	-0.0010018	0.0017278	0.818916	not_sig
19	38444695	A	G	LDL	-0.0098	0.0017	1.152e-08	-0.0069	0.002	0.0004383	0.1324	not_sig	-0.00207682	0.00299112	0.00277069	0.00273945	0.227375	not_sig	-0.00608029	0.00309419	0.0045385	0.00274954	0.00997577	not_sig	-0.0010135	0.00096469	0.0029675	0.001239	0.0152993	not_sig	-0.0020013	0.0019401	0.00018647	0.0016916	0.372982	not_sig
19	41353107	T	C	LDL	0.0098	0.0017	1.495e-08	0.0177	0.0021	1.135e-17	0.04406	not_sig	0.00965439	0.00297366	0.00637099	0.00272944	0.41129	not_sig	0.00150954	0.00307651	0.0144566	0.00273957	0.00159534	not_sig	0.002117	0.00095847	-0.00079835	0.0012338	0.0349871	not_sig	-0.0042769	0.0019276	-0.0041829	0.0016844	0.958666	not_sig
19	42649075	T	C	LDL	-0.4067	0.0681	2.363e-09	-0.6033	0.066	6.496e-20	0.1651	not_sig	NA	NA	NA	NA	NA	NA	NA	NA	NA	NA	NA	NA	NA	NA	NA	NA	NA	NA	NA	NA	NA	NA	NA	NA
19	43234281	A	G	LDL	0.4089	0.0671	1.125e-09	0.612	0.0649	4.195e-21	0.1237	not_sig	NA	NA	NA	NA	NA	NA	NA	NA	NA	NA	NA	NA	NA	NA	NA	NA	NA	NA	NA	NA	NA	NA	NA	NA
19	43829420	A	C	LDL	-0.0837	0.024	0.0004973	-0.1481	0.036	3.936e-05	0.5398	not_sig	NA	NA	NA	NA	NA	NA	NA	NA	NA	NA	NA	NA	NA	NA	NA	NA	NA	NA	NA	NA	NA	NA	NA	NA
19	44388711	C	G	LDL	0.0756	0.0086	2.114e-18	0.0774	0.009	1.111e-17	0.3441	not_sig	-0.023394	0.0143625	0.00294528	0.0130629	0.17059	not_sig	-0.0198735	0.0148578	-0.00917291	0.0131047	0.587469	not_sig	-0.0014787	0.0044128	0.004724	0.0056283	0.410235	not_sig	-0.013327	0.0088748	-0.0015274	0.0076838	0.297488	not_sig
19	45412079	T	C	LDL	0.4556	0.0031	2.70e-4732	0.6159	0.0036	6.54e-6361	3.89e-127	sig	-0.0193906	0.00539619	-0.0237051	0.00495388	0.551905	not_sig	-0.00431717	0.00558369	0.0157795	0.00497268	0.00694075	not_sig	0.0042664	0.0017429	0.00073555	0.0022431	0.104315	not_sig	0.0016364	0.0035052	-0.00029926	0.0030623	0.66176	not_sig
19	47220338	T	TCGG	LDL	0.0154	0.003	3.826e-07	0.0167	0.0036	2.716e-06	0.7119	not_sig	0.00349408	0.00474584	-0.000188114	0.00435992	0.563864	not_sig	-0.00700488	0.00490959	-0.0150025	0.00437575	0.221917	not_sig	NA	NA	NA	NA	NA	NA	NA	NA	NA	NA	NA	NA
19	49206462	T	C	LDL	-0.028	0.0017	4.27e-63	-0.0332	0.0019	7.543e-66	0.2469	not_sig	0.000376589	0.00293024	0.00353984	0.00268512	0.421456	not_sig	-0.0064338	0.00303161	-0.0106643	0.00269507	0.294854	not_sig	-0.0013813	0.00094747	-0.00050449	0.0012176	0.412807	not_sig	-0.0009746	0.0019055	0.0027946	0.0016623	0.106018	not_sig
19	50016759	T	C	LDL	0.0157	0.0025	2.274e-10	0.0235	0.0028	1.513e-17	0.1227	not_sig	-0.00641482	0.00426374	0.00292616	0.00391552	0.103136	not_sig	0.0138654	0.00441111	0.0113463	0.00393032	0.668458	not_sig	9.7574e-05	0.0013533	-0.00074735	0.0017419	0.728578	not_sig	-0.0020339	0.0027217	-0.0010916	0.0023781	0.79843	not_sig
19	57046007	T	C	LDL	-0.0119	0.0019	1.519e-10	-0.014	0.0021	2.007e-11	0.8884	not_sig	-0.000828239	0.00329031	-0.000388541	0.00301935	0.920781	not_sig	-0.0111049	0.0034041	-0.0100609	0.00303012	0.818021	not_sig	0.00050807	0.0010615	0.00017299	0.0013655	0.783294	not_sig	-0.00048449	0.0021348	0.0028704	0.0018642	0.196694	not_sig
19	57969606	T	C	LDL	-0.0565	0.0099	1.302e-08	-0.0566	0.0113	5.502e-07	0.8209	not_sig	-0.00392663	0.0164574	0.0124341	0.0151211	0.459661	not_sig	0.0140091	0.0170287	0.0229449	0.0151665	0.693883	not_sig	-0.010551	0.0052147	0.019518	0.0067058	0.000444973	not_sig	-0.0049989	0.010488	0.012817	0.009155	0.165707	not_sig
19	58662235	T	C	LDL	0.0306	0.0024	1.241e-37	0.0298	0.0027	2.176e-27	0.5892	not_sig	-0.00089853	0.00417062	0.00111834	0.00383061	0.719042	not_sig	0.00486547	0.00431427	0.00178991	0.00384432	0.592936	not_sig	0.00065628	0.0013411	-0.0026547	0.0017281	0.156342	not_sig	0.0027664	0.0026972	-0.00070598	0.0023592	0.3068	not_sig
2	3642361	T	C	LDL	-0.0151	0.0021	2.164e-13	-0.0185	0.0024	1.07e-14	0.3685	not_sig	-0.00373138	0.00385451	0.00545475	0.00353031	0.0758746	not_sig	-0.00653867	0.00400993	0.0127279	0.00355001	0.000302261	not_sig	0.00040533	0.0012483	0.0022279	0.0016057	0.483488	not_sig	-0.00027736	0.0025289	-0.0027558	0.0022054	0.414471	not_sig
2	8718961	A	G	LDL	0.0117	0.0019	2.916e-10	0.0086	0.0021	4.117e-05	0.6422	not_sig	-0.00262092	0.00332553	-0.00215625	0.00304764	0.917131	not_sig	0.00231214	0.00345925	0.00053101	0.00306476	0.698687	not_sig	-0.0015515	0.0010837	-0.00087532	0.0013931	0.513671	not_sig	-0.0041247	0.0021955	0.0020275	0.0019134	0.0249101	not_sig
2	16890382	C	G	LDL	-0.0082	0.0023	0.0002819	0.0002	0.0028	0.9281	0.2501	not_sig	0.00368625	0.00417645	0.00947706	0.00383296	0.302162	not_sig	-0.0064149	0.00434525	-0.0146139	0.00385406	0.156232	not_sig	NA	NA	NA	NA	NA	NA	NA	NA	NA	NA	NA	NA
2	17967586	A	G	LDL	-0.0162	0.0025	1.057e-10	-0.02	0.0029	7.608e-12	0.7266	not_sig	0.000756754	0.00475036	0.002321	0.00434818	0.806194	not_sig	5.58131e-05	0.00494151	-0.0047069	0.00437241	0.468451	not_sig	-8.7864e-05	0.00155	-0.0034904	0.0019899	0.249466	not_sig	-0.00038286	0.0031402	0.0029691	0.0027332	0.379103	not_sig
2	19693384	A	G	LDL	0.3435	0.14	0.01414	0.7176	0.1203	2.471e-09	0.1187	not_sig	NA	NA	NA	NA	NA	NA	NA	NA	NA	NA	NA	NA	NA	NA	NA	NA	NA	NA	NA	NA	NA	NA	NA	NA
2	20370641	A	C	LDL	-0.0165	0.0017	1.608e-22	-0.0213	0.002	1.509e-25	0.2069	not_sig	-0.00164856	0.00292511	-0.000554586	0.00268139	0.780659	not_sig	-0.00266202	0.00304283	-0.00930827	0.00269631	0.100595	not_sig	NA	NA	NA	NA	NA	NA	NA	NA	NA	NA	NA	NA
2	21267461	A	G	LDL	-0.0916	0.0018	8.14e-565	-0.1033	0.002	3.56e-557	0.07779	not_sig	0.000835748	0.00308505	0.00457646	0.00282244	0.366203	not_sig	0.00326271	0.0032087	0.00306967	0.00283795	0.963898	not_sig	-0.00071939	0.0010063	-0.0026049	0.0012916	0.404891	not_sig	-0.0003743	0.0020386	0.0040922	0.001774	0.0705651	not_sig
2	21942500	C	G	LDL	-0.6367	0.1169	5.081e-08	-0.7135	0.1041	7.083e-12	0.1497	not_sig	0.030387	0.113629	0.0848841	0.112655	0.730827	not_sig	-0.00422294	0.118224	0.0246027	0.112478	0.859169	not_sig	NA	NA	NA	NA	NA	NA	NA	NA	NA	NA	NA	NA
2	22501253	T	G	LDL	-0.0012	0.0017	0.4776	0	0.0019	0.9819	0.3789	not_sig	0.00785924	0.00292675	0.00671029	0.00269272	0.770437	not_sig	0.00250167	0.00304449	-0.00206652	0.00270798	0.260124	not_sig	-0.0012593	0.00095189	-0.0017864	0.0012285	0.996558	not_sig	0.0025571	0.0019284	0.0072845	0.0016874	0.037361	not_sig
2	23015285	T	C	LDL	0.0096	0.0021	6.677e-06	0.0008	0.0025	0.7538	0.2309	not_sig	-0.00522718	0.00415256	-0.000412179	0.00381329	0.388335	not_sig	0.00236916	0.00432037	0.00475613	0.00383416	0.678102	not_sig	2.8602e-05	0.0013514	-0.0020702	0.0017411	0.408089	not_sig	0.0035261	0.0027378	0.0022876	0.0023915	0.748377	not_sig
2	24400769	A	C	LDL	0.0099	0.002	4.965e-07	0.0105	0.0022	2.341e-06	0.4721	not_sig	-0.0044931	0.00330146	0.00562599	0.00303948	0.0227504	not_sig	0.00553049	0.00343442	0.0103492	0.00305632	0.292452	not_sig	-0.00050576	0.0010762	0.00043102	0.0013898	0.571323	not_sig	-0.0012311	0.0021802	0.0010205	0.0019089	0.406452	not_sig
2	26358156	A	G	LDL	-0.0305	0.0052	3.808e-09	-0.0275	0.0055	6.511e-07	0.3951	not_sig	0.00834676	0.00813909	-0.00786426	0.00747067	0.138316	not_sig	-0.00197415	0.00846438	-0.0149207	0.00751185	0.250538	not_sig	-0.001859	0.002523	-0.0013093	0.0032532	0.778693	not_sig	-0.00602	0.0051113	-0.0039694	0.0044683	0.777247	not_sig
2	26923568	T	C	LDL	0.0088	0.0017	1.939e-07	0.0113	0.002	6.704e-09	0.1849	not_sig	-0.0110106	0.00300182	-0.00411116	0.00274969	0.0869187	not_sig	0.00621152	0.00312274	0.0108089	0.00276509	0.268256	not_sig	0.00012377	0.00097808	0.00081354	0.0012567	0.729759	not_sig	0.00037489	0.0019815	-0.0006226	0.001726	0.682413	not_sig
2	27730940	T	C	LDL	-0.0276	0.0017	1.818e-59	-0.0358	0.0019	6.63e-77	0.005866	not_sig	0.0202071	0.00297399	0.00251718	0.00272775	9.52682e-06	sig	-0.00847591	0.00309343	-0.00361155	0.00274269	0.237283	not_sig	0.0026624	0.00097391	0.0022376	0.0012526	0.397238	not_sig	-0.0010126	0.0019731	-0.0019295	0.0017205	0.684642	not_sig
2	43561161	A	C	LDL	-0.0112	0.0017	2.208e-11	-0.0163	0.0019	8.174e-18	0.1298	not_sig	0.00110172	0.00293522	0.00159617	0.00269341	0.900234	not_sig	-0.00374671	0.00305324	-0.0035967	0.00270852	0.970552	not_sig	0.0004132	0.00095361	-0.0010927	0.0012278	0.350272	not_sig	0.0028735	0.0019319	0.0006774	0.0016864	0.379389	not_sig
2	44074431	T	C	LDL	0.0628	0.0018	4.06e-257	0.0794	0.0021	5.2e-308	0.0004061	not_sig	0.00132969	0.00310317	-0.00148089	0.00284675	0.500232	not_sig	-0.000810488	0.00322806	0.00720492	0.0028624	0.0620355	not_sig	-0.0015571	0.001014	0.00058024	0.0013047	0.143583	not_sig	-0.0012455	0.0020543	-0.0035343	0.0017921	0.343333	not_sig
2	44663302	T	C	LDL	0.095	0.0099	5.945e-22	0.1038	0.01	4.486e-25	0.1413	not_sig	-0.0244923	0.0154335	-0.028933	0.013827	0.828634	not_sig	0.0202151	0.0160596	-0.0131035	0.0139064	0.115189	not_sig	-0.0046751	0.0046838	-0.001528	0.0058849	0.557316	not_sig	-0.0080881	0.0094889	-0.0049028	0.008083	0.80641	not_sig
2	46166321	A	G	LDL	-0.011	0.0017	4.31e-11	-0.0131	0.0019	4.568e-12	0.2183	not_sig	-0.000819085	0.00292267	-0.00146887	0.00267709	0.868477	not_sig	-0.00483558	0.00304021	0.00556128	0.00269199	0.0101222	not_sig	0.00074162	0.00095134	-0.0018615	0.0012221	0.103821	not_sig	0.00068427	0.0019273	0.0012963	0.0016786	0.781116	not_sig
2	62939397	A	G	LDL	0.0184	0.0018	9.735e-25	0.029	0.002	1.439e-46	0.0003603	not_sig	0.00676095	0.00318106	0.0107597	0.00291069	0.348899	not_sig	-0.00653052	0.00330904	0.00128936	0.00292684	0.0754153	not_sig	-0.0020021	0.0010339	0.00026588	0.0013278	0.109687	not_sig	-0.0054365	0.0020947	-0.0038658	0.0018238	0.607711	not_sig
2	64923808	T	C	LDL	-0.0117	0.0018	1.892e-10	-0.0118	0.0021	2.306e-08	0.7105	not_sig	0.00343978	0.00317497	-0.00894657	0.00291246	0.00368679	not_sig	0.00396873	0.00330286	0.00254486	0.00292876	0.745955	not_sig	-0.0013027	0.0010357	0.0019731	0.0013323	0.050072	not_sig	-0.0046833	0.0020983	0.00076198	0.0018299	0.0397863	not_sig
2	70449776	A	G	LDL	0.0096	0.0017	2.096e-08	0.0124	0.0019	2.049e-10	0.3086	not_sig	0.000337881	0.00298439	0.00235125	0.00274058	0.615739	not_sig	-0.00422044	0.00310414	0.000168461	0.00275581	0.288237	not_sig	-0.0013771	0.00097234	0.00022003	0.0012525	0.234608	not_sig	-0.0018685	0.0019699	-0.00031522	0.0017203	0.53983	not_sig
2	85879041	T	G	LDL	0.0104	0.0021	6.02e-07	0.0119	0.0025	1.382e-06	0.8475	not_sig	-0.00283812	0.00324424	0.000379703	0.00297358	0.460189	not_sig	0.00514568	0.00337461	0.00516406	0.00299024	0.996733	not_sig	NA	NA	NA	NA	NA	NA	NA	NA	NA	NA	NA	NA
2	88438050	A	C	LDL	-0.0082	0.0017	7.285e-07	-0.0125	0.0019	3.199e-11	0.3402	not_sig	0.00155531	0.00293957	-0.00362954	0.002701	0.18957	not_sig	0.00493002	0.00305754	0.0010779	0.002716	0.344109	not_sig	0.00022903	0.00095576	-0.00044347	0.0012324	0.669828	not_sig	-0.0014014	0.0019363	-0.00062152	0.0016927	0.761834	not_sig
2	101631888	C	G	LDL	-0.0132	0.0017	7.336e-15	-0.012	0.002	8.484e-10	0.371	not_sig	-0.00704338	0.00302252	-0.00363426	0.00277156	0.401092	not_sig	0.00149155	0.00314409	-0.00325878	0.002787	0.256118	not_sig	8.53e-06	0.00098593	-0.00051386	0.0012682	0.777364	not_sig	-0.0013832	0.0019974	-0.00022286	0.0017419	0.651111	not_sig
2	109090267	C	G	LDL	-0.0169	0.0021	1.661e-16	-0.02	0.0024	3.285e-17	0.8736	not_sig	-0.00163972	0.00369914	-0.00151486	0.00338869	0.979944	not_sig	0.00175842	0.00384791	4.62155e-05	0.00340743	0.737927	not_sig	-0.00015427	0.0012069	0.0011912	0.0015508	0.535326	not_sig	0.0038521	0.0024451	0.0029391	0.0021301	0.807393	not_sig
2	113841030	A	G	LDL	-0.0043	0.0017	0.009367	-0.0162	0.0019	8.443e-17	0.000137	not_sig	0.00222048	0.00296495	7.11926e-05	0.00271601	0.589265	not_sig	0.00290322	0.00308406	-0.0117575	0.00273085	0.000350632	not_sig	0.00096434	0.00096975	0.0017857	0.0012456	0.821834	not_sig	0.0024826	0.0019646	0.0016196	0.0017108	0.755505	not_sig
2	118843158	A	G	LDL	0.0398	0.003	3.612e-40	0.0459	0.0034	1.496e-41	0.2286	not_sig	-0.0147864	0.00487745	-0.0089215	0.00449609	0.371849	not_sig	-0.00136281	0.00507458	0.00474925	0.00452076	0.366365	not_sig	0.0030929	0.0015774	0.0033354	0.0020392	0.719537	not_sig	-0.0029704	0.0031957	0.0030716	0.0028008	0.127655	not_sig
2	121306440	A	G	LDL	0.0199	0.0017	3.175e-31	0.0233	0.002	9.683e-31	0.2807	not_sig	-0.00235929	0.00295686	-0.00294511	0.00271283	0.882772	not_sig	-0.00141396	0.0030757	0.00959955	0.00272774	0.0071272	not_sig	0.0010023	0.00096727	0.00059926	0.0012447	0.649829	not_sig	-0.00053062	0.0019596	-0.00080656	0.0017096	0.898282	not_sig
2	122797791	C	G	LDL	-0.5685	0.1322	1.694e-05	-0.3313	0.1177	0.004888	0.02828	not_sig	NA	NA	NA	NA	NA	NA	NA	NA	NA	NA	NA	NA	NA	NA	NA	NA	NA	NA	NA	NA	NA	NA	NA	NA
2	135014116	A	G	LDL	-0.0124	0.0019	1.144e-10	-0.0102	0.0022	3.375e-06	0.3159	not_sig	0.00334006	0.00350344	0.00169958	0.00321045	0.727321	not_sig	-0.000224269	0.00364436	0.00174098	0.00322818	0.68515	not_sig	0.0017635	0.0011359	-0.0010914	0.0014605	0.0926067	not_sig	-0.00035192	0.0023012	-0.00044696	0.002006	0.967644	not_sig
2	135954797	T	C	LDL	0.0192	0.002	8.878e-21	0.0191	0.0025	2.326e-14	0.7629	not_sig	NA	NA	NA	NA	NA	NA	NA	NA	NA	NA	NA	NA	0.0021926	0.0010689	-0.0013199	0.0013735	0.0275014	not_sig	0.001067	0.0021656	-0.0034541	0.0018865	0.0874518	not_sig
2	158434569	T	C	LDL	0.0314	0.0028	1.523e-28	0.025	0.0033	1.66e-14	0.1397	not_sig	0.00726598	0.00549865	0.00636437	0.00504523	0.902873	not_sig	-0.00129398	0.00571975	-0.0371718	0.00507319	2.43601e-06	sig	0.0031442	0.0017942	-0.0020982	0.0023093	0.0520808	not_sig	0.0056882	0.0036349	-0.0025591	0.0031719	0.0698134	not_sig
6	127439897	C	G	nonHDL	-0.0139	0.0051	0.006357	-0.0602	0.0046	1.088e-38	3.856e-11	sig	0.0183854	0.00590585	0.0208752	0.0054333	0.753994	not_sig	-0.0903691	0.0061276	-0.169021	0.00544146	5.41987e-22	sig	NA	NA	NA	NA	NA	NA	NA	NA	NA	NA	NA	NA
2	169830661	A	G	LDL	0.0203	0.0016	4.535e-35	0.0225	0.0019	1.924e-32	0.9092	not_sig	0.00102135	0.00297672	0.00271939	0.002733	0.671259	not_sig	0.000790854	0.00309637	0.00245803	0.00274811	0.685862	not_sig	0.00054015	0.00097227	-0.00013433	0.0012519	0.622374	not_sig	-0.0004259	0.0019697	0.00032217	0.0017195	0.760109	not_sig
2	216300482	A	T	LDL	-0.0171	0.0019	9.318e-19	-0.0168	0.0022	1.401e-14	0.2402	not_sig	-0.0130345	0.0033179	-0.000239024	0.00305212	0.00414641	not_sig	0.0102253	0.00345162	0.0224608	0.00306888	0.00779419	not_sig	0.0010641	0.0010783	-6.7422e-06	0.0013904	0.454681	not_sig	0.00017242	0.0021845	-0.0023449	0.0019098	0.342206	not_sig
2	219138170	T	G	LDL	-0.0102	0.0018	8.003e-09	-0.0103	0.0022	1.837e-06	0.2521	not_sig	NA	NA	NA	NA	NA	NA	NA	NA	NA	NA	NA	NA	NA	NA	NA	NA	NA	NA	NA	NA	NA	NA	NA	NA
2	219699999	A	G	LDL	-0.0159	0.0047	0.0006317	-0.0314	0.0051	5.211e-10	0.003788	not_sig	NA	NA	NA	NA	NA	NA	NA	NA	NA	NA	NA	NA	NA	NA	NA	NA	NA	NA	NA	NA	NA	NA	NA	NA
2	234679549	T	C	LDL	0.0234	0.0027	2.496e-18	0.0267	0.0031	3.733e-18	0.7026	not_sig	-0.00619325	0.00462822	0.000471189	0.00424458	0.283763	not_sig	-0.00603545	0.004814	0.00759819	0.00426864	0.0333071	not_sig	-0.00023167	0.0015111	-0.00095984	0.0019448	0.82523	not_sig	-0.0048016	0.0030614	-0.0013083	0.0026712	0.379182	not_sig
20	5547384	T	C	LDL	-0.0388	0.0061	2.798e-10	-0.056	0.0064	1.235e-18	0.004795	not_sig	0.00734336	0.00908459	-0.0061081	0.00830825	0.269753	not_sig	0.0011561	0.00940177	0.0137751	0.00833731	0.313143	not_sig	-0.00084119	0.002917	0.0022271	0.0037395	0.533074	not_sig	0.0043303	0.0058654	-0.0042741	0.0051063	0.236058	not_sig
20	12959885	A	G	LDL	0.0122	0.0017	6.2e-13	0.0164	0.0019	1.032e-17	0.3428	not_sig	-0.0012309	0.00300715	-0.00602741	0.00276174	0.23539	not_sig	-0.00504928	0.00311196	0.00102408	0.00277225	0.143281	not_sig	0.0015743	0.00097162	0.002309	0.001249	0.971251	not_sig	-0.00317	0.0019537	1.4393e-05	0.0017056	0.200011	not_sig
20	17844684	T	G	LDL	0.0362	0.0018	2.93e-94	0.0391	0.0021	1.77e-78	0.4329	not_sig	0.00430648	0.00309545	0.00120854	0.00284095	0.456423	not_sig	-0.00307939	0.00320364	-0.00837248	0.00285149	0.215124	not_sig	0.00073461	0.0010044	-0.00089002	0.00129	0.306506	not_sig	0.0022209	0.0020197	0.00040677	0.0017616	0.485197	not_sig
20	25207931	A	G	LDL	0.0073	0.0017	1.679e-05	0.0124	0.0019	9.218e-11	0.4258	not_sig	0.0060238	0.00293318	0.0136498	0.002688	0.0528624	not_sig	0.00780662	0.00303562	-0.000203379	0.00269786	0.0475887	not_sig	0.00020036	0.00094882	-0.00022902	0.0012167	0.773524	not_sig	0.0050978	0.0019078	0.0020668	0.0016614	0.228139	not_sig
20	34160840	A	G	LDL	0.028	0.0023	6.6e-35	0.0308	0.0027	4.947e-31	0.8287	not_sig	-0.00745026	0.00424042	-0.00301955	0.00390702	0.437657	not_sig	0.00874552	0.00438894	0.000683535	0.00392135	0.168871	not_sig	-0.0011264	0.0013704	-0.00064374	0.0017674	0.710457	not_sig	-0.0035575	0.0027556	0.00042612	0.0024135	0.253827	not_sig
20	39179822	C	G	LDL	-0.1302	0.0055	1.92e-122	-0.1358	0.0058	6.4e-122	0.7878	not_sig	0.0195331	0.00880774	0.0330802	0.00794972	0.24881	not_sig	-0.0181885	0.00911854	-0.0727096	0.0079802	6.20659e-06	sig	0.0018773	0.0027967	0.0019399	0.0035388	0.888461	not_sig	0.0010077	0.0056235	0.0019734	0.0048323	0.880265	not_sig
20	39754695	C	G	LDL	0.0262	0.0017	1.091e-56	0.0355	0.0019	7.72e-79	0.01362	not_sig	0.00292236	0.0029429	0.000446128	0.0026927	0.530646	not_sig	0.00931456	0.00304576	0.0153384	0.00270286	0.137327	not_sig	-0.00067673	0.00095144	-0.002544	0.0012186	0.377934	not_sig	0.0055032	0.0019131	-0.0013714	0.001664	0.00424726	not_sig
20	43042364	T	C	LDL	0.0432	0.0047	9.311e-20	0.0698	0.0054	1.255e-38	0.03363	not_sig	0.00283521	0.00838457	-0.0066399	0.00778779	0.402968	not_sig	-0.0115827	0.00867879	-0.0240759	0.0078155	0.282632	not_sig	9.4189e-05	0.002716	0.00049894	0.0035304	0.943526	not_sig	0.0033875	0.0054613	-0.0029772	0.0048209	0.350296	not_sig
20	44552895	A	C	LDL	0.0096	0.0018	1.19e-07	0.0111	0.0021	9.444e-08	0.3804	not_sig	-0.00210638	0.00333267	-0.000248919	0.00306041	0.678403	not_sig	-0.00799522	0.00344887	0.00899545	0.0030721	0.000219973	not_sig	0.0027381	0.0010767	0.00031455	0.0013839	0.0773994	not_sig	-0.0012473	0.002165	0.0030592	0.0018898	0.104716	not_sig
20	47582884	A	G	LDL	-0.009	0.0018	6.566e-07	-0.0153	0.002	4.391e-14	0.129	not_sig	0.0136488	0.00313988	0.00818513	0.00287732	0.195047	not_sig	-0.00177241	0.00324952	-0.00265925	0.00288815	0.837659	not_sig	0.00022508	0.0010153	0.00057407	0.0013022	0.894635	not_sig	-0.0015553	0.0020415	-0.001819	0.0017782	0.889683	not_sig
20	52535400	T	C	LDL	-0.0113	0.0017	9.454e-12	-0.0099	0.0019	2.267e-07	0.3227	not_sig	-0.00202772	0.00298721	0.00277016	0.00274634	0.232372	not_sig	0.00133444	0.00309156	0.00104648	0.00275665	0.944331	not_sig	0.0019659	0.00095905	0.00079449	0.0012337	0.267551	not_sig	0.00098316	0.0019284	0.0015129	0.0016846	0.803775	not_sig
20	61341472	A	G	LDL	0.0142	0.0019	2.849e-14	0.0113	0.0022	1.346e-07	0.2526	not_sig	NA	NA	NA	NA	NA	NA	NA	NA	NA	NA	NA	NA	0.0016259	0.00098764	-0.0012062	0.0012668	0.0583963	not_sig	0.0026876	0.0019859	0.0031346	0.0017298	0.80818	not_sig
20	62712053	T	C	LDL	-0.0128	0.0017	4.951e-14	-0.0131	0.002	7.879e-11	0.9123	not_sig	0.00818269	0.00294521	0.00794563	0.00270575	0.95226	not_sig	-0.001371	0.00304802	-0.0256478	0.00271613	2.33458e-09	sig	0.0001391	0.00095536	-0.0010902	0.0012287	0.474751	not_sig	0.0009424	0.001921	-0.00080556	0.0016778	0.463846	not_sig
21	16586682	A	T	LDL	0.0128	0.0053	0.01603	0.0432	0.0061	1.479e-12	0.1955	not_sig	0.00112386	0.0110101	-0.00188604	0.00999837	0.83803	not_sig	-0.00885791	0.0113825	0.000629447	0.0100359	0.530035	not_sig	0.0055472	0.0035476	-0.003132	0.0045145	0.0976267	not_sig	-0.012252	0.007126	-0.0025673	0.006161	0.290087	not_sig
21	33089703	A	C	LDL	0.0399	0.0042	1.046e-21	0.023	0.0046	5.642e-07	0.008961	not_sig	-0.00975975	0.00712879	-0.00651535	0.00650687	0.734219	not_sig	-0.00503578	0.00737127	-0.0254463	0.00653088	0.0373748	not_sig	0.0057358	0.0022968	-0.0047404	0.0029386	0.00282079	not_sig	-0.00012321	0.0046136	0.0013493	0.0040104	0.792127	not_sig
21	40554355	A	C	LDL	-0.0172	0.0017	1.116e-24	-0.0111	0.0019	4.117e-09	0.02883	not_sig	-0.0121099	0.00297034	-0.00982252	0.0027207	0.566258	not_sig	0.0020655	0.00307074	-0.00307499	0.00273123	0.208985	not_sig	-0.0028391	0.00095723	-0.0017081	0.0012285	0.195275	not_sig	-0.0018755	0.0019228	0.0087337	0.0016765	5.94098e-06	sig
22	18481857	T	C	LDL	-0.012	0.0019	6.91e-10	-0.0124	0.0023	3.405e-08	0.9311	not_sig	0.00295247	0.00341327	0.000362878	0.00313145	0.572296	not_sig	0.00585622	0.0035302	0.00894819	0.00314342	0.511173	not_sig	0.00086843	0.0010934	-0.002063	0.0014066	0.109688	not_sig	0.0026244	0.0021988	0.0017149	0.0019182	0.769658	not_sig
22	19949013	T	C	LDL	-0.0074	0.0017	7.524e-06	-0.0117	0.0019	6.216e-10	0.1643	not_sig	-0.00735874	0.00298361	-0.0138009	0.00273772	0.108073	not_sig	0.00218247	0.00308583	-0.00714382	0.00274824	0.0233941	not_sig	-0.00041447	0.00095374	0.0013636	0.0012265	0.277483	not_sig	-0.0052353	0.001918	0.00094722	0.0016727	0.0106033	not_sig
22	21916272	A	C	LDL	0.014	0.0023	1.963e-09	0.0149	0.0028	9.842e-08	0.6162	not_sig	-0.00198079	0.00389155	-0.00011425	0.00356542	0.720938	not_sig	-0.00424397	0.00402504	-0.0038698	0.00357939	0.944375	not_sig	NA	NA	NA	NA	NA	NA	NA	NA	NA	NA	NA	NA
22	30575749	T	C	LDL	0.0284	0.0036	3.396e-15	0.0212	0.0044	1.78e-06	0.607	not_sig	-0.000416329	0.00986667	-0.01872	0.00895625	0.165323	not_sig	0.00307383	0.0102066	0.000655299	0.00898986	0.858251	not_sig	-0.0021644	0.0031788	0.008718	0.0040418	0.0479539	not_sig	-0.0074651	0.0063929	0.0016893	0.005512	0.253059	not_sig
22	31551160	T	C	LDL	0.0109	0.0019	1.046e-08	0.0091	0.0022	3.206e-05	0.2991	not_sig	0.00352325	0.00338879	0.00827444	0.00310208	0.296225	not_sig	-0.00654623	0.00350497	-0.0129063	0.00311394	0.17303	not_sig	-0.00055641	0.0010939	5.1088e-05	0.0014033	0.68231	not_sig	-0.0040489	0.0022	0.00050749	0.0019137	0.100954	not_sig
22	35685048	A	G	LDL	-0.0121	0.0017	1.469e-12	-0.0146	0.0019	5.463e-14	0.5643	not_sig	-0.00216272	0.00308079	0.00632494	0.00282625	0.0403091	not_sig	-0.0106868	0.0031861	-0.0151464	0.00283702	0.293735	not_sig	0.0002426	0.00099349	-0.0014332	0.0012773	0.34255	not_sig	0.0018297	0.001998	-0.0024197	0.001742	0.0848615	not_sig
22	36545826	T	C	LDL	-0.0159	0.0021	1.003e-13	-0.009	0.0025	0.0003106	0.1519	not_sig	-0.0107713	0.00380836	-0.00464076	0.00350018	0.231255	not_sig	0.00490936	0.00393839	0.0113825	0.00351367	0.218	not_sig	-0.00054075	0.0012275	-0.0022609	0.0015811	0.52014	not_sig	-0.00015848	0.0024686	-0.0031661	0.0021562	0.312131	not_sig
22	37462936	A	G	LDL	-0.0116	0.0017	4.161e-12	-0.0063	0.0019	0.0009888	0.1835	not_sig	-0.00517783	0.00298622	0.00378672	0.0027409	0.0254932	not_sig	0.00300746	0.0030885	-0.00736933	0.00275159	0.0117452	not_sig	0.00032113	0.00095799	-0.00088179	0.001232	0.458688	not_sig	0.0014792	0.0019266	3.2133e-05	0.0016802	0.555198	not_sig
22	41227086	C	G	LDL	-0.0131	0.0018	4.561e-13	-0.015	0.002	1.589e-13	0.7214	not_sig	-0.00982424	0.00311713	-0.00292841	0.00286092	0.0997187	not_sig	0.00231746	0.00322372	-0.00317202	0.00287191	0.201573	not_sig	-0.00077823	0.0010019	-0.00041028	0.0012886	0.711754	not_sig	-0.0019147	0.0020149	0.00045974	0.0017574	0.349173	not_sig
22	42538514	T	TC	LDL	-0.0042	0.0019	0.02524	-0.0026	0.0023	0.2624	0.9519	not_sig	NA	NA	NA	NA	NA	NA	NA	NA	NA	NA	NA	NA	NA	NA	NA	NA	NA	NA	NA	NA	NA	NA	NA	NA
22	44324855	A	G	LDL	0.0157	0.002	7.395e-16	0.0137	0.0022	7.02e-10	0.1459	not_sig	0.00666315	0.00357733	0.0049875	0.00328251	0.72739	not_sig	-0.0149128	0.00369951	-0.00700156	0.0032952	0.108735	not_sig	0.0015127	0.001153	-0.00086949	0.0014827	0.164384	not_sig	-0.00088651	0.0023188	0.0033128	0.002022	0.137893	not_sig
22	45996298	A	G	LDL	-0.0368	0.0057	1.341e-10	-0.0347	0.0066	1.264e-07	0.3681	not_sig	0.0032514	0.00931263	-0.0147938	0.0085349	0.149054	not_sig	0.00636779	0.00963345	-0.00247514	0.00857052	0.490923	not_sig	-0.0027321	0.003009	0.0065242	0.0038632	0.0663191	not_sig	-0.0092536	0.0060513	0.00094433	0.0052685	0.182592	not_sig
22	46730338	C	G	LDL	0.0631	0.0147	1.692e-05	0.1072	0.0163	5.23e-11	0.0755	not_sig	-0.0169459	0.0243328	-0.00323021	0.0219062	0.672208	not_sig	-0.00542869	0.0251949	-0.0206092	0.0219746	0.648334	not_sig	NA	NA	NA	NA	NA	NA	NA	NA	NA	NA	NA	NA
22	50840573	A	G	LDL	-0.0116	0.0017	1.215e-11	-0.0112	0.002	1.017e-08	0.2797	not_sig	0.00354134	0.00308681	-0.000510761	0.00282719	0.328185	not_sig	-0.00322837	0.00319232	-0.00892711	0.00283792	0.180227	not_sig	-5.5699e-06	0.00099372	0.001725	0.0012754	0.354892	not_sig	0.0024459	0.0019984	-0.0010505	0.0017393	0.161796	not_sig
3	12327431	T	G	LDL	-0.0278	0.002	7.82e-44	-0.0222	0.0023	9.757e-23	0.01315	not_sig	0.00541335	0.00336181	0.00535051	0.00309003	0.988909	not_sig	-0.0115192	0.00349635	-0.0235148	0.00310365	0.00996216	not_sig	-0.0016451	0.0010867	0.0004715	0.0014008	0.170151	not_sig	0.0024832	0.0021978	0.0003315	0.0019183	0.445242	not_sig
3	12856856	A	G	LDL	-0.0095	0.0017	3.326e-08	-0.0083	0.002	2.535e-05	0.4659	not_sig	-0.00522701	0.00299983	0.00253225	0.00275475	0.0543172	not_sig	-0.0147271	0.00311976	-0.0141109	0.00276725	0.882016	not_sig	0.00015132	0.00097724	0.00065364	0.0012597	0.812393	not_sig	0.007785	0.0019764	0.00059115	0.0017252	0.00438738	not_sig
3	24520283	A	G	LDL	-0.0161	0.0019	1.452e-17	-0.0127	0.0021	8.486e-10	0.1777	not_sig	NA	NA	NA	NA	NA	NA	NA	NA	NA	NA	NA	NA	-0.00056388	0.001059	0.00093291	0.0013631	0.385025	not_sig	0.0029696	0.0021419	0.00024407	0.0018668	0.319127	not_sig
3	32533010	T	C	LDL	0.031	0.0027	1.085e-29	0.0323	0.0032	1.618e-23	0.6861	not_sig	-0.000120255	0.00512067	0.00623928	0.00469138	0.355002	not_sig	-0.00507132	0.00532505	0.00250863	0.00471256	0.284318	not_sig	0.00040251	0.0016691	0.0034059	0.002146	0.368359	not_sig	0.0052517	0.0033758	0.003468	0.0029389	0.709066	not_sig
3	52558133	T	C	LDL	0.0105	0.0016	1.483e-10	0.0109	0.0019	6.054e-09	0.6907	not_sig	0.00764983	0.00292612	0.00508305	0.00269223	0.514385	not_sig	-0.0127859	0.00304303	-0.0150585	0.00270403	0.574984	not_sig	0.0010903	0.00095168	0.001667	0.0012288	0.949634	not_sig	0.004294	0.0019247	0.0016868	0.0016828	0.304103	not_sig
3	58391293	C	G	LDL	-0.0357	0.0031	2.199e-31	-0.039	0.0035	3.779e-28	0.8957	not_sig	-0.00620722	0.00528484	-0.0109431	0.00487267	0.505761	not_sig	0.00318308	0.00549595	-0.00955929	0.00489466	0.0820265	not_sig	0.00076135	0.0017174	0.0028415	0.0022218	0.588685	not_sig	-0.0016098	0.0034735	-0.0017319	0.0030428	0.961495	not_sig
3	69837571	C	G	LDL	0.0109	0.0017	1.207e-10	0.0142	0.0019	2.793e-13	0.777	not_sig	-0.00106918	0.00307029	-0.00126616	0.00282021	0.961936	not_sig	0.0045055	0.00319279	0.00634259	0.00283267	0.665518	not_sig	0.00012732	0.00099732	0.0006908	0.0012854	0.786806	not_sig	-0.0025638	0.0020171	-0.0046009	0.0017604	0.374128	not_sig
3	100465609	A	G	LDL	-0.0102	0.0018	9.464e-09	-0.0076	0.002	0.0001314	0.9767	not_sig	0.000694568	0.00304217	-0.00118895	0.00279777	0.645301	not_sig	0.00499786	0.00316391	0.00360129	0.00281029	0.740286	not_sig	-0.00092116	0.00098934	-0.00039204	0.0012767	0.622494	not_sig	0.00085876	0.0020009	0.003208	0.0017484	0.322603	not_sig
3	119536429	A	G	LDL	0.0155	0.0019	9.58e-17	0.0107	0.0021	5.496e-07	0.1158	not_sig	-0.00975455	0.00353606	-0.0138347	0.00324172	0.390291	not_sig	0.00921046	0.00367756	0.00777039	0.00325609	0.768395	not_sig	0.00083069	0.0011488	-0.0010029	0.0014777	0.313134	not_sig	-0.0012496	0.0023234	0.0023853	0.0020237	0.202752	not_sig
3	123068744	T	C	LDL	0.0062	0.002	0.001581	0.015	0.0023	4.831e-11	0.0003632	not_sig	-0.00899872	0.00338567	-0.000147194	0.00311413	0.0519478	not_sig	-0.00208998	0.00352136	-0.000650863	0.00312766	0.758915	not_sig	-0.00040719	0.0011003	-0.00064469	0.0014194	0.975226	not_sig	0.001582	0.0022253	0.0016769	0.0019438	0.948315	not_sig
3	124959834	T	C	LDL	-0.0125	0.0018	1.248e-12	-0.0089	0.002	5.952e-06	0.06142	not_sig	-0.00311405	0.00309481	-0.00658044	0.00283899	0.404461	not_sig	0.0105419	0.00321853	0.00892266	0.00285145	0.705258	not_sig	0.0014438	0.001005	0.0011014	0.0012936	0.614408	not_sig	-0.00080779	0.0020325	0.0021054	0.0017716	0.241784	not_sig
3	126060315	T	C	LDL	0.0137	0.0019	1.247e-12	0.0121	0.0022	2.505e-08	0.7174	not_sig	0.00131569	0.00346241	-0.00309257	0.00317984	0.343562	not_sig	0.00252493	0.00360105	0.00880737	0.00319403	0.189878	not_sig	-0.00090889	0.0011205	0.0024373	0.0014438	0.077745	not_sig	0.00035116	0.0022662	0.0063695	0.0019772	0.027458	not_sig
3	127281890	A	G	LDL	-0.0125	0.0025	8.123e-07	-0.013	0.0029	5.377e-06	0.738	not_sig	-0.000779075	0.00472047	0.000163652	0.00433127	0.881844	not_sig	0.00737235	0.00490822	0.00472115	0.00434967	0.684713	not_sig	-0.00062378	0.0015349	0.0051617	0.0019766	0.0367919	not_sig	0.00057753	0.0031043	0.0044501	0.002707	0.298013	not_sig
3	129274936	A	G	LDL	0.0189	0.0025	2.221e-14	0.0176	0.0029	1.206e-09	0.4339	not_sig	-0.00882371	0.00436444	-0.00522903	0.00402438	0.540806	not_sig	0.00683847	0.00453899	0.0146855	0.00404201	0.194705	not_sig	0.00053284	0.0014191	-0.00072613	0.0018362	0.580106	not_sig	0.0015401	0.0028702	0.0019376	0.0025146	0.891269	not_sig
3	132183991	A	G	LDL	0.0422	0.004	6.818e-26	0.0433	0.0046	9.101e-21	0.9418	not_sig	-0.00869061	0.00642799	-0.00209094	0.00588812	0.444451	not_sig	0.00657484	0.0066848	-0.0074159	0.00591268	0.11535	not_sig	-0.0022238	0.0020871	-0.0029592	0.0026815	0.957631	not_sig	-0.0022759	0.0042211	0.00032274	0.0036723	0.625648	not_sig
3	133490334	A	C	LDL	-0.0113	0.0021	1.291e-07	-0.0107	0.0025	2.579e-05	0.5978	not_sig	0.000321179	0.00370445	-0.0033606	0.00341452	0.460427	not_sig	-0.00602993	0.00385263	0.00633262	0.00342917	0.0160627	not_sig	NA	NA	NA	NA	NA	NA	NA	NA	NA	NA	NA	NA
3	136020541	T	C	LDL	0.0112	0.002	1.235e-08	0.0147	0.0022	4.248e-11	0.9068	not_sig	0.0185506	0.00337844	0.0186753	0.00310228	0.978092	not_sig	0.00199322	0.00351373	0.0102063	0.00311607	0.0789998	not_sig	0.0010113	0.0010965	5.198e-05	0.0014132	0.502415	not_sig	-0.0014207	0.0022177	-0.0001682	0.0019353	0.659306	not_sig
3	142159885	A	G	LDL	0.0099	0.0025	6.767e-05	0.016	0.0028	1.023e-08	0.4243	not_sig	-0.00105542	0.00430461	0.00167277	0.00393116	0.63643	not_sig	0.00986096	0.00447614	-0.00401706	0.00394869	0.0195277	not_sig	-0.001494	0.0013998	-0.0030087	0.0017954	0.738631	not_sig	-0.0040179	0.0028311	0.00066189	0.0024587	0.189471	not_sig
3	142660706	A	G	LDL	0.0117	0.0018	3.049e-11	0.014	0.002	4.051e-12	0.609	not_sig	0.00122444	0.00306689	-0.00025216	0.00280896	0.719881	not_sig	0.0028644	0.00318941	0.000438319	0.00282107	0.567132	not_sig	-0.00013993	0.00099622	-0.0011833	0.0012803	0.600518	not_sig	-0.00066763	0.0020148	0.00055087	0.0017533	0.625936	not_sig
3	155546124	T	C	LDL	-0.0744	0.014	1.083e-07	-0.0813	0.0162	5.114e-07	0.6345	not_sig	0.0442721	0.0206468	0.0307521	0.0188191	0.624972	not_sig	0.0300316	0.0214718	0.00511413	0.0188921	0.381527	not_sig	0.002157	0.006744	0.006605	0.0085828	0.780342	not_sig	-0.005766	0.01364	-0.0069073	0.011754	0.930414	not_sig
3	160028014	T	C	LDL	-0.0124	0.0017	1.668e-13	-0.0126	0.0019	3.729e-11	0.7656	not_sig	0.00432836	0.00292212	-0.000434719	0.00268666	0.225519	not_sig	0.00170662	0.00303913	0.00347352	0.00269836	0.662351	not_sig	0.0017768	0.00095024	0.0029102	0.0012257	0.832906	not_sig	0.00049704	0.0019219	0.00096503	0.0016786	0.831927	not_sig
3	170758329	T	G	LDL	0.0108	0.0029	0.0001842	0.0214	0.0034	4.886e-10	0.1236	not_sig	0.0160296	0.0054566	0.0132259	0.00500917	0.702227	not_sig	-0.000209115	0.005675	0.00558256	0.00503215	0.443102	not_sig	3.7872e-05	0.0017705	-0.00035346	0.002282	0.903021	not_sig	0.0029411	0.0035808	-0.0053238	0.0031251	0.060606	not_sig
3	171536255	T	G	LDL	0.0104	0.0022	1.867e-06	0.018	0.0025	1.51e-12	0.1187	not_sig	-0.00266749	0.00394732	-0.000660719	0.00362419	0.705245	not_sig	-0.013619	0.00410484	-0.00780389	0.00363952	0.287023	not_sig	-0.0024988	0.0012837	-0.00020019	0.0016539	0.1657	not_sig	-0.0041103	0.0025963	0.0028343	0.002265	0.0316662	not_sig
3	195942080	T	TG	LDL	-0.0102	0.0018	3.541e-08	-0.0112	0.0023	9.333e-07	0.4745	not_sig	NA	NA	NA	NA	NA	NA	NA	NA	NA	NA	NA	NA	NA	NA	NA	NA	NA	NA	NA	NA	NA	NA	NA	NA
4	3443931	A	G	LDL	-0.0139	0.0017	5.973e-16	-0.0236	0.002	2.64e-33	0.001743	not_sig	-0.00328766	0.00305792	-0.00765447	0.00280207	0.287583	not_sig	-0.00476156	0.00317443	-0.00901325	0.00281733	0.314341	not_sig	0.0012923	0.00098439	0.0056943	0.0012646	0.0379256	not_sig	0.0024639	0.0019888	-0.0012732	0.0017305	0.13209	not_sig
4	7222253	A	G	LDL	-0.0101	0.0017	2.118e-09	-0.014	0.0019	3.689e-13	0.5597	not_sig	-0.00353368	0.00300669	-0.00903178	0.00276227	0.173784	not_sig	-0.0045547	0.00312147	-0.0010374	0.00277691	0.397776	not_sig	-0.0010875	0.00097613	-0.0010007	0.0012573	0.765912	not_sig	-0.00068825	0.0019722	-0.0019736	0.0017205	0.579532	not_sig
4	15028043	C	G	LDL	-0.0092	0.0018	2.1e-07	-0.0095	0.002	2.976e-06	0.9001	not_sig	-0.0104043	0.00307199	-0.00224668	0.00281893	0.048128	not_sig	-0.00184999	0.00318931	0.0109919	0.00283441	0.00250275	not_sig	0.001192	0.00099438	0.0033213	0.0012796	0.387107	not_sig	6.8975e-05	0.002009	0.0017406	0.001751	0.489836	not_sig
4	54453676	T	C	LDL	-0.0123	0.0023	9.498e-08	-0.0129	0.0026	8.531e-07	0.9523	not_sig	-0.00221605	0.00416274	0.00103754	0.00381227	0.560433	not_sig	-0.00430054	0.00432132	-0.00735659	0.00383403	0.595184	not_sig	0.0017201	0.0013522	-0.00014038	0.0017374	0.309608	not_sig	0.00052407	0.002732	-0.00030057	0.0023774	0.808633	not_sig
4	69491284	A	T	LDL	0.0422	0.0023	7.527e-77	0.016	0.0026	9.381e-10	4.247e-15	sig	NA	NA	NA	NA	NA	NA	NA	NA	NA	NA	NA	NA	NA	NA	NA	NA	NA	NA	NA	NA	NA	NA	NA	NA
4	70264840	A	G	LDL	-0.095	0.0146	8.586e-11	-0.0701	0.0158	8.675e-06	0.6245	not_sig	-0.00839605	0.0215391	0.0208372	0.0194077	0.308485	not_sig	-0.0200164	0.0223435	0.00724884	0.0195076	0.355864	not_sig	0.0074572	0.0066655	0.0046575	0.0084059	0.632216	not_sig	0.01121	0.013467	0.0035756	0.011503	0.660786	not_sig
4	72754788	A	C	LDL	0.3193	0.0326	1.269e-22	0.3372	0.0327	6.549e-25	0.04538	not_sig	NA	NA	NA	NA	NA	NA	NA	NA	NA	NA	NA	NA	NA	NA	NA	NA	NA	NA	NA	NA	NA	NA	NA	NA
4	73491622	A	G	LDL	-0.409	0.0298	5.683e-43	-0.3907	0.0315	2.114e-35	0.4236	not_sig	NA	NA	NA	NA	NA	NA	NA	NA	NA	NA	NA	NA	NA	NA	NA	NA	NA	NA	NA	NA	NA	NA	NA	NA
4	74033564	C	G	LDL	-0.4715	0.0302	5.025e-55	-0.4635	0.0311	2.619e-50	0.5576	not_sig	0.0285194	0.0991487	-0.0223765	0.101393	0.716968	not_sig	-0.0977758	0.102958	0.11454	0.101958	0.141081	not_sig	NA	NA	NA	NA	NA	NA	NA	NA	NA	NA	NA	NA
4	74793806	A	G	LDL	-0.3563	0.0275	2.362e-38	-0.3275	0.0293	4.712e-29	0.9441	not_sig	-0.0534524	0.0789439	0.0519323	0.0786394	0.339424	not_sig	0.024012	0.0819765	0.00798002	0.0788024	0.887383	not_sig	NA	NA	NA	NA	NA	NA	NA	NA	NA	NA	NA	NA
4	75416194	T	C	LDL	0.24	0.0262	5.226e-20	0.2286	0.0295	9.157e-15	0.5249	not_sig	0.0610423	0.124577	-0.180507	0.12678	0.169849	not_sig	-0.142007	0.129362	0.136402	0.127486	0.123633	not_sig	NA	NA	NA	NA	NA	NA	NA	NA	NA	NA	NA	NA
4	77420407	A	G	LDL	-0.0091	0.0017	7.97e-08	-0.012	0.0019	6.343e-10	0.5033	not_sig	-0.00128634	0.00305802	-0.00355078	0.00280561	0.581547	not_sig	-0.00361612	0.00317486	-0.0047453	0.00282116	0.78944	not_sig	0.00014163	0.00099183	-0.00075489	0.0012764	0.60929	not_sig	-0.0079235	0.0020038	0.00026833	0.0017466	0.00127586	not_sig
4	88052219	T	C	LDL	0.0093	0.0017	1.999e-08	0.0092	0.0019	1.147e-06	0.8357	not_sig	0.00125247	0.00299632	0.00795512	0.0027433	0.095618	not_sig	0.00463395	0.00311072	0.00703422	0.00275833	0.561996	not_sig	0.00039528	0.00097232	-0.00089677	0.0012484	0.425788	not_sig	-0.000562	0.0019645	0.0025974	0.0017084	0.18636	not_sig
4	99713350	T	C	LDL	0.0632	0.0091	3.351e-12	0.0521	0.0109	1.65e-06	0.07204	not_sig	0.0588891	0.0158226	0.0417575	0.0148206	0.42477	not_sig	0.0146659	0.0164326	0.00685253	0.014896	0.723459	not_sig	NA	NA	NA	NA	NA	NA	NA	NA	NA	NA	NA	NA
4	100488580	C	G	LDL	0.0172	0.0019	3.934e-20	0.0161	0.0022	9.571e-14	0.07025	not_sig	-0.000236528	0.00335252	0.00171026	0.00308546	0.666051	not_sig	0.00189487	0.00348039	0.00336361	0.00310222	0.751686	not_sig	0.0016309	0.0010879	0.0028865	0.0014047	0.784268	not_sig	0.001984	0.002198	0.0027548	0.0019221	0.743295	not_sig
4	103188709	T	C	LDL	0.0279	0.0035	1.122e-15	0.0238	0.0041	6.639e-09	0.2439	not_sig	-0.0485083	0.00552257	-0.046728	0.00512715	0.811395	not_sig	0.0270112	0.00573435	0.0382485	0.00515512	0.143258	not_sig	0.0027925	0.001796	0.0036811	0.002338	0.930431	not_sig	0.0049585	0.0036285	0.0090149	0.0031992	0.328274	not_sig
4	106064683	A	G	LDL	-0.0092	0.002	4.01e-06	-0.0154	0.0022	6.518e-12	0.0826	not_sig	0.00290605	0.00363302	0.00245943	0.0033238	0.927006	not_sig	0.00140274	0.00377161	-0.0272629	0.00334204	1.10646e-08	sig	-0.0019275	0.0011796	-0.0020974	0.0015141	0.770471	not_sig	-0.0084011	0.0023832	-0.0051986	0.0020719	0.333318	not_sig
4	110942277	C	G	LDL	0.0093	0.0018	2.592e-07	0.0113	0.002	1.914e-08	0.8436	not_sig	0.00146154	0.00314044	-0.00449762	0.00288302	0.157981	not_sig	-0.000739756	0.00326027	0.00481756	0.00289901	0.200745	not_sig	0.00032941	0.0010196	0.0025652	0.0013129	0.276193	not_sig	0.0011242	0.00206	0.0039258	0.0017966	0.250657	not_sig
4	120128060	A	C	LDL	-0.0141	0.0026	4.303e-08	-0.0149	0.0029	2.14e-07	0.639	not_sig	-0.0044506	0.00441377	-0.000207443	0.00405031	0.474342	not_sig	0.00533496	0.00458182	0.0285678	0.00407218	0.000140771	not_sig	0.00048111	0.0014329	-0.00057403	0.0018453	0.641505	not_sig	0.0053246	0.0028951	0.0016234	0.0025251	0.326084	not_sig
4	128662796	T	C	LDL	-0.0069	0.0017	4.807e-05	-0.0066	0.0019	0.0007087	0.3722	not_sig	-0.00305526	0.00305362	0.000341483	0.00280258	0.407803	not_sig	0.000266491	0.00316986	-0.0022228	0.00281796	0.555524	not_sig	8.5422e-05	0.00098639	0.00012917	0.0012698	0.9968	not_sig	-0.0018745	0.0019929	0.0022826	0.0017376	0.0913631	not_sig
4	151206057	T	G	LDL	-0.0078	0.0017	4.992e-06	-0.0085	0.0019	1.259e-05	0.7222	not_sig	0.00431817	0.00302738	0.000727313	0.00277692	0.3773	not_sig	-0.00519009	0.00314297	-0.00168581	0.00279214	0.402468	not_sig	0.00011295	0.00098252	-0.00017998	0.0012639	0.854107	not_sig	-0.0016619	0.0019851	-0.0047941	0.0017294	0.179625	not_sig
4	154191226	A	G	LDL	0.014	0.0023	1.58e-09	0.0155	0.0026	4.047e-09	0.1966	not_sig	-0.000830223	0.00393723	0.00214674	0.00359322	0.572686	not_sig	0.0107992	0.0040871	-0.00677864	0.00361341	0.00121079	not_sig	0.0023404	0.0012775	0.00093602	0.001636	0.318781	not_sig	0.0015866	0.0025811	0.0035845	0.0022386	0.504051	not_sig
4	155489608	T	C	LDL	-0.0807	0.0148	5.112e-08	-0.1559	0.0148	8.122e-26	0.0002219	not_sig	0.0254816	0.0208729	-0.00614779	0.0188567	0.256074	not_sig	0.0284796	0.0216694	-0.0227295	0.0189654	0.0740779	not_sig	-0.0060331	0.0065252	0.003752	0.0082977	0.313456	not_sig	-0.0018554	0.013183	0.010289	0.011355	0.446572	not_sig
4	185251995	A	T	LDL	0.0092	0.0017	5.273e-08	0.0071	0.0019	0.0002751	0.3662	not_sig	-0.00125902	0.00301517	0.000374052	0.00276402	0.686756	not_sig	-0.0126811	0.00313015	-0.00495888	0.00277933	0.063894	not_sig	0.0006729	0.00097086	-0.0023275	0.0012485	0.0727964	not_sig	0.00038651	0.0019615	0.00088727	0.0017084	0.8261	not_sig
5	52095024	T	C	LDL	0.0549	0.0045	1.206e-33	0.0502	0.0051	1.171e-22	0.2028	not_sig	-0.00519254	0.00736686	0.00442807	0.00678737	0.332	not_sig	-0.00819363	0.00764509	-0.00711118	0.006821	0.91549	not_sig	-0.00063285	0.002391	-0.0058721	0.0030879	0.271437	not_sig	0.00099412	0.0048229	-0.0024499	0.0042283	0.561029	not_sig
5	55861359	A	G	LDL	-0.0109	0.002	9.517e-08	-0.0208	0.0023	8.191e-19	0.05979	not_sig	-0.00406561	0.00360132	0.00542425	0.00331278	0.0501277	not_sig	-0.00401831	0.00373661	-0.0495862	0.00332909	5.93164e-20	sig	0.00051649	0.0011697	-0.00014024	0.0015084	0.691734	not_sig	0.00054111	0.0023593	0.0035648	0.0020655	0.285141	not_sig
5	72159179	T	C	LDL	-0.0136	0.0018	3.978e-14	-0.0189	0.0021	3.572e-20	0.1338	not_sig	0.0010926	0.00324123	0.000228509	0.0029647	0.842504	not_sig	-0.00742417	0.00336254	-0.00397196	0.00297916	0.44021	not_sig	0.00026078	0.001051	-0.00061257	0.0013479	0.619253	not_sig	-0.00025148	0.0021201	0.0025237	0.0018456	0.280234	not_sig
5	74656539	T	C	LDL	0.0665	0.0017	8.22e-352	0.0763	0.0019	1.59e-356	0.02851	not_sig	-0.0162506	0.0029809	-0.0247799	0.00273385	0.0331757	not_sig	0.00573972	0.00309295	-0.00293697	0.00274736	0.0351503	not_sig	-7.2222e-06	0.00096957	-0.00099495	0.0012468	0.59037	not_sig	-0.0026276	0.0019557	-0.0019431	0.0017073	0.815114	not_sig
5	122833667	T	C	LDL	-0.0162	0.0017	1.091e-22	-0.0169	0.0019	3.725e-19	0.7658	not_sig	0.00302404	0.00293837	0.00260893	0.00269132	0.916197	not_sig	0.000236439	0.00304885	-0.0038796	0.00270441	0.310385	not_sig	-0.00041958	0.00095441	-3.5557e-05	0.0012258	0.754724	not_sig	0.00421	0.0019251	-0.00078627	0.0016785	0.0395683	not_sig
5	131807624	A	G	LDL	0.0146	0.002	9.776e-14	0.0219	0.0023	9.312e-22	0.1983	not_sig	-0.0104056	0.00377334	-0.00689433	0.00344978	0.48788	not_sig	0.0103703	0.00391492	0.00551191	0.00346705	0.350745	not_sig	-0.001795	0.0012224	0.0016593	0.0015669	0.0670963	not_sig	0.0030886	0.0024656	-0.0035076	0.0021455	0.0303703	not_sig
5	139527721	A	G	LDL	0.0098	0.0021	4.071e-06	0.0132	0.0024	4.715e-08	0.8338	not_sig	-0.000659284	0.00390663	0.00892528	0.00358299	0.0678088	not_sig	-0.00458434	0.00405373	-0.000100899	0.00359988	0.40618	not_sig	0.00017285	0.0012638	-0.00075714	0.001625	0.67386	not_sig	-0.0016775	0.0025491	0.00064594	0.0022251	0.467199	not_sig
5	141888881	T	C	LDL	-0.0154	0.0027	1.346e-08	-0.0238	0.0031	2.224e-14	0.08875	not_sig	0.00579514	0.00472713	0.00393254	0.00436122	0.769895	not_sig	0.00451571	0.00490414	0.00219522	0.00438233	0.723052	not_sig	0.001639	0.0015337	0.0022851	0.0019844	0.986243	not_sig	0.0002652	0.0030937	0.0027668	0.0027173	0.502267	not_sig
5	156391628	T	C	LDL	0.0327	0.0017	2.674e-83	0.042	0.002	1.33e-102	0.06612	not_sig	-0.00670851	0.00303367	0.000353195	0.0027788	0.0829599	not_sig	0.00083878	0.00314785	-0.0052576	0.00279214	0.145601	not_sig	-7.3244e-05	0.00098563	-0.00048075	0.0012657	0.839492	not_sig	0.0019145	0.0019881	-0.0014027	0.0017332	0.179685	not_sig
5	176522036	T	C	LDL	0.0101	0.0018	2.907e-08	0.0094	0.0021	1.089e-05	0.9133	not_sig	-0.00545729	0.00322735	-0.00904766	0.00295663	0.407364	not_sig	0.0205373	0.00334848	0.00906609	0.00297095	0.0100571	not_sig	-0.00087864	0.0010466	0.000205	0.0013442	0.460385	not_sig	0.0019889	0.002111	0.0015061	0.0018406	0.880597	not_sig
6	11842824	A	G	LDL	0.0169	0.003	2.482e-08	0.0275	0.0036	1.944e-14	0.5734	not_sig	0.000298343	0.00561371	-0.00354408	0.00515405	0.610567	not_sig	0.00204685	0.00582128	0.00979421	0.00516216	0.317242	not_sig	0.00014474	0.001819	0.0016622	0.0023428	0.671588	not_sig	-0.0035555	0.0036743	0.00088545	0.0032093	0.337122	not_sig
6	16126934	A	G	LDL	0.0263	0.0017	3.507e-52	0.035	0.002	9.816e-69	0.2723	not_sig	0.00127621	0.00318633	0.00393244	0.00292249	0.534909	not_sig	-0.00057312	0.00330567	0.00532809	0.00292696	0.179452	not_sig	-0.00085486	0.001032	-0.00094375	0.0013276	0.888024	not_sig	0.0024427	0.0020847	-0.00030874	0.0018186	0.296502	not_sig
6	18757805	T	C	LDL	-0.0083	0.0018	6.171e-06	-0.0109	0.0022	6.457e-07	0.9651	not_sig	-0.00107125	0.00307108	-0.00394588	0.00281638	0.485929	not_sig	-0.00424045	0.00318623	-0.00275926	0.00282097	0.726643	not_sig	NA	NA	NA	NA	NA	NA	NA	NA	NA	NA	NA	NA
6	20413721	A	G	LDL	0.0102	0.0017	5.401e-09	0.0087	0.002	1.045e-05	0.2064	not_sig	0.00268424	0.00311054	0.00141524	0.00285789	0.761555	not_sig	-0.000201095	0.00322726	-0.00263964	0.00286281	0.570203	not_sig	0.00055233	0.0010084	-0.00052896	0.0012991	0.489498	not_sig	-0.00050237	0.0020369	0.0016142	0.0017796	0.395636	not_sig
6	21384613	A	G	LDL	0.01	0.0017	1.803e-09	0.0074	0.0019	0.0001049	0.3493	not_sig	-6.49766e-05	0.00299804	0.00111356	0.00275902	0.77016	not_sig	-0.00501036	0.00311017	-0.00166595	0.00276357	0.419448	not_sig	-0.0016421	0.0009744	0.0011824	0.0012568	0.0557143	not_sig	0.0046104	0.0019683	0.0017387	0.0017216	0.267355	not_sig
6	22343592	A	G	LDL	0.0219	0.0036	9.919e-10	0.0188	0.0041	5.154e-06	0.6367	not_sig	-0.00338376	0.00575804	0.00665425	0.00530424	0.195291	not_sig	0.00103726	0.00597393	-0.00466683	0.00531236	0.473579	not_sig	-0.0014168	0.0018651	-0.0032281	0.0024068	0.731443	not_sig	0.00044823	0.0037674	-0.0062413	0.003297	0.143472	not_sig
6	25314597	A	G	LDL	-0.0285	0.0036	4.232e-15	-0.0265	0.004	3.569e-11	0.7847	not_sig	-0.00823831	0.00569804	-0.0182083	0.00520496	0.191942	not_sig	0.00509629	0.00590996	0.00207071	0.00521394	0.699798	not_sig	-0.0004856	0.0018335	0.00028631	0.0023435	0.776761	not_sig	0.0034289	0.0037036	-0.0015577	0.0032102	0.280448	not_sig
6	25918225	T	C	LDL	-0.0643	0.0036	1.836e-71	-0.0509	0.004	9.653e-37	0.001276	not_sig	-0.01562	0.00549203	-0.0116893	0.00502964	0.593951	not_sig	0.0114705	0.00569683	0.00434227	0.00503765	0.34646	not_sig	0.0014392	0.0017828	0.00032372	0.0022886	0.607405	not_sig	0.0016138	0.0036013	-0.0050509	0.003135	0.129787	not_sig
6	27067657	A	T	LDL	-0.0393	0.0034	1.013e-30	-0.0279	0.0039	6.037e-13	0.04816	not_sig	-0.00876482	0.00532994	-0.00462656	0.0048831	0.563104	not_sig	0.0083621	0.00552771	-0.00282059	0.00489145	0.128082	not_sig	0.002877	0.0017226	0.00026124	0.0022149	0.23763	not_sig	0.006814	0.0034796	0.0045968	0.003034	0.655438	not_sig
6	29935250	A	G	LDL	-0.0149	0.0017	6.867e-19	-0.0152	0.002	1.319e-14	0.5107	not_sig	-0.00176162	0.00291989	-0.00268764	0.00267947	0.81342	not_sig	0.00875408	0.00302917	0.00283812	0.00268381	0.142039	not_sig	0.0016484	0.00094726	0.0022676	0.0012186	0.963891	not_sig	0.0077822	0.0019134	0.0016859	0.0016693	0.0135647	not_sig
6	31885930	T	C	LDL	-0.0159	0.0018	7.907e-19	-0.0193	0.0021	1.73e-20	0.3731	not_sig	-0.0120922	0.00298882	-0.00488941	0.00274654	0.0730838	not_sig	-0.0269978	0.00310067	-0.0220402	0.00275105	0.229646	not_sig	-0.00019446	0.0009686	0.00021565	0.0012479	0.787625	not_sig	-0.0026214	0.0019565	-0.002724	0.0017094	0.921101	not_sig
6	32657201	A	T	LDL	-0.0408	0.0026	5.152e-57	-0.0489	0.003	3.545e-60	0.2312	not_sig	0.014179	0.00451158	0.0086051	0.00411579	0.356584	not_sig	-0.017179	0.00467943	-0.0145979	0.00412292	0.67764	not_sig	0.002705	0.0014629	-0.0017201	0.0018717	0.0429524	not_sig	0.0023521	0.002955	0.0034296	0.002564	0.737035	not_sig
6	34616322	C	G	LDL	0.0218	0.0027	3.727e-16	0.0279	0.003	5.657e-20	0.1497	not_sig	-0.0270076	0.00456747	-0.0277702	0.00420559	0.901267	not_sig	0.0189825	0.00473802	0.013814	0.00421211	0.412861	not_sig	-0.0021433	0.0014925	-0.00089102	0.001926	0.443186	not_sig	-0.0066114	0.0030148	-0.0063294	0.0026383	0.989063	not_sig
6	37037818	T	TA	LDL	-0.0117	0.0017	9.085e-12	-0.0142	0.0021	1.065e-11	0.2355	not_sig	-0.0028758	0.00293071	-0.00396584	0.00268897	0.781923	not_sig	0.00188663	0.00304049	-0.00168201	0.00269356	0.37755	not_sig	NA	NA	NA	NA	NA	NA	NA	NA	NA	NA	NA	NA
6	39238772	T	C	LDL	-0.0092	0.0018	5.374e-07	-0.0107	0.0021	3.531e-07	0.864	not_sig	0.010692	0.0031182	0.0060365	0.00286515	0.266811	not_sig	-0.00188786	0.00323504	-0.00720698	0.00286988	0.216678	not_sig	-0.00050455	0.0010106	-0.0014312	0.0013018	0.708899	not_sig	0.0053371	0.0020413	0.0006707	0.0017833	0.0746334	not_sig
6	42940673	A	G	LDL	-0.0143	0.0017	2.502e-17	-0.0129	0.0019	1.747e-11	0.15	not_sig	0.00309629	0.00296006	0.00404674	0.0027216	0.811304	not_sig	0.00310247	0.00307081	0.00228864	0.00272622	0.842214	not_sig	-0.0018448	0.00096356	-0.0012558	0.0012417	0.450663	not_sig	0.004428	0.0019464	0.0029689	0.001701	0.599151	not_sig
6	43756169	T	C	LDL	0.009	0.0028	0.001544	0.0207	0.0032	8.489e-11	0.112	not_sig	NA	NA	NA	NA	NA	NA	NA	NA	NA	NA	NA	NA	NA	NA	NA	NA	NA	NA	NA	NA	NA	NA	NA	NA
6	52458678	C	G	LDL	0.0124	0.0017	6.525e-13	0.0163	0.002	6.539e-17	0.1371	not_sig	0.00738591	0.00305444	-0.000440367	0.00280885	0.0567812	not_sig	-0.00101409	0.00316847	0.00344399	0.00281348	0.290629	not_sig	-0.00013739	0.00098805	0.00066548	0.0012736	0.644426	not_sig	0.0015931	0.0019958	0.00040414	0.0017447	0.645816	not_sig
6	53509035	C	G	LDL	-0.0144	0.0019	2.999e-14	-0.0136	0.0021	2.197e-10	0.1906	not_sig	0.00269662	0.00331906	0.00728206	0.0030416	0.303581	not_sig	0.00152982	0.0034435	0.00161086	0.00304675	0.985876	not_sig	0.0019464	0.0010771	-0.0019483	0.0013835	0.0200923	not_sig	0.0025562	0.0021758	-0.0035192	0.0018952	0.0235493	not_sig
6	100602753	A	G	LDL	0.0168	0.002	2.078e-17	0.0231	0.0023	8.032e-24	0.1365	not_sig	-0.0180777	0.00342515	-0.0141153	0.0031377	0.388905	not_sig	0.00823399	0.00355319	0.023655	0.00314271	0.00109369	not_sig	0.00034279	0.001109	0.0016756	0.0014244	0.570214	not_sig	-0.0011237	0.0022402	0.00070093	0.0019512	0.513161	not_sig
6	101432314	A	G	LDL	0.0115	0.0017	4.713e-12	0.013	0.0019	5.687e-12	0.5458	not_sig	-0.0101026	0.00293391	-0.00580035	0.00268984	0.274947	not_sig	-0.00202107	0.00304416	0.00632508	0.00269418	0.0391934	not_sig	-0.00061041	0.00094945	0.001047	0.0012198	0.284412	not_sig	-0.0041417	0.0019178	-0.0063613	0.0016709	0.294384	not_sig
6	106378009	T	G	LDL	0.0087	0.0017	1.975e-07	0.0141	0.0019	8.789e-14	0.5375	not_sig	-0.00380427	0.00293864	0.00110558	0.00270095	0.214054	not_sig	-0.00115279	0.0030487	0.00108817	0.00270515	0.580782	not_sig	0.00094061	0.00095196	0.00089753	0.0012263	0.805499	not_sig	0.00015865	0.0019229	-9.147e-05	0.0016798	0.917017	not_sig
6	109323519	T	G	LDL	0.0149	0.0026	6.682e-09	0.0112	0.0029	0.0001256	0.07158	not_sig	0.00241416	0.00448749	0.00189799	0.00411428	0.931756	not_sig	0.00249621	0.00465537	-0.0057387	0.00412072	0.183389	not_sig	0.00066277	0.0014577	0.0021698	0.0018736	0.655796	not_sig	-0.0021036	0.0029446	-0.0025903	0.0025666	0.867684	not_sig
6	116394819	A	T	LDL	0.0201	0.0017	8.478e-33	0.0136	0.0019	2.224e-12	0.003046	not_sig	-0.00255153	0.00295643	-0.00160015	0.00271419	0.810769	not_sig	-0.000305951	0.00306695	0.00129058	0.00271871	0.695605	not_sig	0.0011267	0.00095796	0.0008423	0.0012329	0.673035	not_sig	-0.0017198	0.0019351	0.00069572	0.0016889	0.319118	not_sig
6	126873423	T	G	LDL	0.0129	0.0023	1.617e-08	0.0152	0.0025	1.133e-09	0.7869	not_sig	NA	NA	NA	NA	NA	NA	NA	NA	NA	NA	NA	NA	-0.0033859	0.0012533	-6.1815e-05	0.0016059	0.0436692	not_sig	0.00062953	0.0025317	-0.0012696	0.0021999	0.540684	not_sig
6	130367863	T	TA	LDL	0.0099	0.0018	4.696e-08	0.0095	0.0022	1.433e-05	0.297	not_sig	-0.00752548	0.00311275	-0.0112497	0.00285236	0.372947	not_sig	0.0188925	0.00322875	0.0168494	0.00285689	0.634079	not_sig	NA	NA	NA	NA	NA	NA	NA	NA	NA	NA	NA	NA
6	135418916	A	G	LDL	-0.0286	0.0019	1.352e-53	-0.0191	0.0021	1.439e-19	0.001556	not_sig	0.00557477	0.00333305	-0.00678095	0.00305277	0.00575963	not_sig	0.00798289	0.00345791	0.00346804	0.00305771	0.325894	not_sig	0.0012467	0.0010801	0.0028086	0.0013868	0.612164	not_sig	-0.0011128	0.0021819	-0.0025737	0.0018997	0.564597	not_sig
6	139331253	A	G	LDL	0.0176	0.0022	3.212e-15	0.023	0.0025	1.089e-19	0.04936	not_sig	-0.00183088	0.0038739	-0.00360895	0.00356892	0.733131	not_sig	0.00298677	0.00401943	0.00169326	0.00357453	0.809138	not_sig	-0.0011757	0.0012391	0.001241	0.0016004	0.21315	not_sig	-0.0033258	0.002503	-0.00020684	0.0021923	0.329751	not_sig
6	127440047	T	C	logTG	0.0296	0.0041	3.882e-13	0.085	0.0045	2.902e-80	8.382e-16	sig	-0.0129196	0.0068291	-0.026021	0.00627124	0.153507	not_sig	0.102931	0.00708685	0.213527	0.00628122	8.91034e-32	sig	-0.003184	0.0022003	5.1784e-05	0.0028338	0.269372	not_sig	-0.0014481	0.0044446	-0.0061199	0.0038819	0.377083	not_sig
6	151015562	A	G	LDL	-0.0157	0.0029	7.828e-08	-0.013	0.0033	8.016e-05	0.6822	not_sig	0.00441949	0.00498328	-0.00363174	0.00461232	0.231056	not_sig	-0.0123703	0.00516946	0.0050266	0.00461961	0.011721	not_sig	0.0013997	0.0016128	0.00047276	0.0020928	0.61849	not_sig	-0.0041061	0.0032578	0.0029164	0.0028667	0.0844546	not_sig
6	151898506	T	C	LDL	-0.0194	0.0023	3.307e-17	-0.0135	0.0026	1.827e-07	0.02885	not_sig	-0.00527592	0.00448256	-0.00189036	0.00410567	0.573736	not_sig	-0.00115544	0.00465053	0.00722779	0.00411248	0.174992	not_sig	3.5591e-05	0.0014503	0.0004101	0.0018612	0.895405	not_sig	-0.00041945	0.0029296	-0.00021117	0.0025495	0.95776	not_sig
6	153043035	A	G	LDL	-0.0105	0.0022	2.732e-06	-0.0117	0.0025	3.619e-06	0.564	not_sig	0.00286245	0.00377189	0.00551105	0.00345359	0.600903	not_sig	-0.0017741	0.00391309	0.00937341	0.00345934	0.0320535	not_sig	0.00029487	0.001224	0.00020232	0.0015717	0.924812	not_sig	-0.0011005	0.0024724	-0.0062009	0.0021529	0.084022	not_sig
6	160492613	T	C	LDL	0.0654	0.0051	1.013e-37	0.0759	0.0058	1.17e-38	0.09468	not_sig	0.0134836	0.0116873	-0.00638975	0.0106618	0.204494	not_sig	-0.00117577	0.0121248	0.00441941	0.0106795	0.727977	not_sig	-0.0028443	0.0037806	-0.0046464	0.0048322	0.933444	not_sig	0.012213	0.0076367	0.0032975	0.0066193	0.366713	not_sig
6	161010118	A	G	LDL	0.0995	0.0035	2.06e-179	0.1358	0.004	1.76e-257	6.675e-08	sig	-0.00342925	0.00539834	-0.00287533	0.00494958	0.939108	not_sig	0.00483483	0.0055989	0.0107449	0.00495799	0.42734	not_sig	-0.0033618	0.001752	-0.0032543	0.0022508	0.642144	not_sig	-0.0024322	0.003539	0.00035415	0.0030832	0.532875	not_sig
6	161659369	C	G	LDL	0.0858	0.0078	1.784e-28	0.0896	0.009	3.692e-23	0.7533	not_sig	0.00292325	0.0165719	0.00249454	0.0151463	0.984612	not_sig	0.0341098	0.0171986	-0.0154072	0.0151743	0.0301238	not_sig	NA	NA	NA	NA	NA	NA	NA	NA	NA	NA	NA	NA
7	1067906	T	C	LDL	-0.0209	0.002	1.388e-25	-0.0217	0.0023	2.23e-21	0.9108	not_sig	-0.00149919	0.00356382	0.00021567	0.0032804	0.720646	not_sig	-0.000341853	0.00369481	-0.00398932	0.00329305	0.459169	not_sig	0.0012854	0.0011534	0.00036968	0.0014886	0.502463	not_sig	-0.0051694	0.0023289	0.0013357	0.0020387	0.0266426	not_sig
7	2296552	A	G	LDL	0.0959	0.0158	1.406e-09	0.13	0.018	4.636e-13	0.1516	not_sig	0.0324194	0.0239157	-0.0103261	0.0216915	0.181158	not_sig	0.038417	0.0247885	-0.0538022	0.0217767	0.00499693	not_sig	-0.0027187	0.0077582	0.0050253	0.0098579	0.541061	not_sig	-0.0096774	0.015665	0.00037375	0.013501	0.611263	not_sig
7	8471545	T	C	LDL	-0.1597	0.0463	0.0005675	-0.1015	0.0729	0.1642	0.81	not_sig	NA	NA	NA	NA	NA	NA	NA	NA	NA	NA	NA	NA	NA	NA	NA	NA	NA	NA	NA	NA	NA	NA	NA	NA
7	21605973	A	G	LDL	0.0334	0.0021	8.372e-58	0.0432	0.0023	8.461e-77	0.06857	not_sig	0.00149002	0.0035436	-0.00198907	0.00324861	0.464793	not_sig	-0.00119598	0.0036746	-0.00036373	0.00326075	0.864889	not_sig	-0.0028189	0.0011488	-0.0012872	0.0014752	0.207698	not_sig	-0.00018966	0.0023197	-0.0036742	0.0020203	0.212053	not_sig
7	25991826	T	C	LDL	0.0327	0.0023	4.508e-46	0.0385	0.0026	2.251e-48	0.5952	not_sig	-0.00248256	0.0039915	-0.00593256	0.00366766	0.520322	not_sig	-0.00572273	0.0041385	-0.0147173	0.00368189	0.102901	not_sig	-0.001568	0.0012961	0.002187	0.0016686	0.0707518	not_sig	-0.0064823	0.0026171	0.0031935	0.0022852	0.00311038	not_sig
7	28215361	C	G	LDL	-0.0188	0.0027	3.251e-12	-0.0138	0.003	5.135e-06	0.01855	not_sig	-0.00259548	0.00541835	0.00953867	0.00497265	0.0956088	not_sig	0.000953777	0.0056187	-0.0127906	0.0049924	0.0662549	not_sig	0.0011924	0.001753	0.0033575	0.002254	0.615986	not_sig	0.0047491	0.0035397	0.0014474	0.003087	0.473655	not_sig
7	36171953	T	C	LDL	-0.0157	0.0021	3.343e-14	-0.0185	0.0024	3.997e-15	0.3152	not_sig	-0.00342656	0.00377428	-0.00657324	0.00346694	0.535147	not_sig	0.00488316	0.00391366	-0.00555917	0.00348023	0.0452138	not_sig	0.00021679	0.0012218	-0.0007798	0.001572	0.636799	not_sig	-0.00066179	0.002467	-0.0023452	0.0021529	0.564624	not_sig
7	41746922	C	G	LDL	0.011	0.002	2.52e-08	0.0115	0.0022	2.762e-07	0.6868	not_sig	-0.000692431	0.00343742	0.00376483	0.00315448	0.334557	not_sig	0.00619989	0.00356441	-0.00121336	0.00316655	0.118355	not_sig	-0.00069291	0.0011101	0.00030387	0.0014277	0.537613	not_sig	-0.0042642	0.0022415	0.0024516	0.0019552	0.0163286	not_sig
7	44581986	T	C	LDL	0.0354	0.002	8.019e-68	0.0444	0.0024	9.008e-78	0.03232	not_sig	-0.00387802	0.00378443	0.00536349	0.00346137	0.0687515	not_sig	0.00275064	0.00392348	-0.0025423	0.00347467	0.310399	not_sig	-0.00078994	0.0012268	0.00080121	0.0015733	0.404596	not_sig	-0.00061272	0.0024772	0.00017503	0.0021546	0.800016	not_sig
7	73020301	T	C	LDL	-0.0198	0.0049	6.036e-05	-0.0446	0.0054	7.875e-17	0.06738	not_sig	0.0103374	0.00719077	0.0190838	0.00656577	0.364272	not_sig	-0.0155534	0.00745647	-0.030143	0.00659072	0.140884	not_sig	-0.0021303	0.0023338	0.004026	0.0029889	0.108136	not_sig	-0.0029339	0.0047125	0.0032094	0.0040934	0.291237	not_sig
7	75614777	A	G	LDL	-0.0105	0.0021	5.843e-07	-0.0159	0.0024	2.291e-11	0.5131	not_sig	-0.00907993	0.00377798	-0.00359691	0.00346399	0.279932	not_sig	0.000731146	0.00391775	0.00339383	0.0034773	0.609667	not_sig	-0.00070528	0.0012246	-0.0004426	0.0015744	0.807713	not_sig	-0.001054	0.0024727	0.0062622	0.0021561	0.0150015	not_sig
7	87076587	A	C	LDL	0.0127	0.002	3.13e-10	0.0165	0.0024	2.134e-12	0.1254	not_sig	0.00266095	0.00381015	0.00152605	0.00349703	0.824586	not_sig	0.00248439	0.00395123	0.00512118	0.00351029	0.616305	not_sig	-0.0015905	0.0012366	0.0003512	0.001591	0.262042	not_sig	-0.0012815	0.0024969	-0.0051822	0.0021789	0.18868	not_sig
7	97977268	A	G	LDL	0.0166	0.0022	9.776e-14	0.0213	0.0024	9.684e-19	0.2459	not_sig	-0.00493947	0.00376121	-0.00377358	0.00346577	0.817898	not_sig	0.00956902	0.00390027	0.001413	0.00347903	0.117017	not_sig	0.0021201	0.0012191	-0.00034657	0.0015736	0.143873	not_sig	-0.0050257	0.0024615	-0.0016283	0.0021551	0.290941	not_sig
7	100280896	A	C	LDL	-0.0287	0.003	8.993e-22	-0.0286	0.0033	9.511e-18	0.2633	not_sig	-0.00140211	0.00487288	-0.00110929	0.00445738	0.964279	not_sig	-0.000581679	0.00505175	0.00717617	0.00447435	0.248227	not_sig	-0.0016947	0.0015716	-0.0015242	0.0020158	0.763713	not_sig	-0.0035163	0.0031733	-0.001245	0.0027607	0.584258	not_sig
7	104638501	A	C	LDL	-0.0126	0.0023	5.846e-08	-0.0122	0.0027	6.029e-06	0.8363	not_sig	0.00260394	0.00455672	0.00232035	0.00418008	0.963053	not_sig	-0.00631641	0.00472509	-0.0081936	0.00419632	0.765428	not_sig	-0.00098398	0.0014773	0.0014522	0.0018999	0.305837	not_sig	0.0045436	0.0029829	0.0018221	0.002602	0.488913	not_sig
7	107056795	A	G	LDL	0.0112	0.0018	4.225e-10	0.0156	0.002	1.47e-14	0.148	not_sig	-0.00415015	0.00317932	-0.00116162	0.00291202	0.483839	not_sig	-0.00212548	0.00329673	-0.0100323	0.00292324	0.0714773	not_sig	-0.00023676	0.0010295	-0.0010948	0.0013214	0.696298	not_sig	0.004263	0.0020787	0.0014532	0.0018097	0.300781	not_sig
7	127015083	A	G	LDL	-0.0282	0.0059	1.558e-06	-0.0365	0.0067	4.748e-08	0.9061	not_sig	-0.0366501	0.0110516	-0.0272015	0.0102703	0.52701	not_sig	-0.00931493	0.0114584	-0.0230092	0.0103118	0.372238	not_sig	0.001925	0.0034252	-6.4197e-06	0.0044612	0.672317	not_sig	0.0094466	0.0069161	0.010365	0.0061097	0.868339	not_sig
7	130442141	C	G	LDL	0.0051	0.0018	0.004616	0.0165	0.002	3.708e-16	0.0001495	not_sig	-0.00886864	0.00317876	-0.00942184	0.00290554	0.896768	not_sig	-0.00550316	0.0032961	0.035575	0.00291665	6.95456e-21	sig	-0.00018108	0.0010269	-0.0019905	0.0013153	0.370336	not_sig	-0.00079708	0.0020734	-0.00011547	0.0018014	0.797449	not_sig
7	137561861	A	G	LDL	-0.0768	0.0089	5.221e-18	-0.0748	0.0116	1.146e-10	0.175	not_sig	-0.0213321	0.0617237	0.0628531	0.0590664	0.319572	not_sig	0.0204465	0.064017	0.00828923	0.0592984	0.888709	not_sig	NA	NA	NA	NA	NA	NA	NA	NA	NA	NA	NA	NA
7	155026807	T	C	LDL	0.0167	0.0028	1.882e-09	0.0219	0.0032	7.441e-12	0.9597	not_sig	0.00473461	0.00555674	-0.0062967	0.00514982	0.14137	not_sig	-0.00298343	0.00576244	-0.010563	0.00516878	0.325371	not_sig	-0.00047978	0.0018034	0.00090187	0.0023428	0.642753	not_sig	0.0044081	0.0036415	-0.0061129	0.0032085	0.0197511	not_sig
8	6600349	T	C	LDL	0.0082	0.0018	5.053e-06	0.0153	0.002	3.745e-14	0.3832	not_sig	-0.00202118	0.0031344	-0.00156427	0.00287295	0.913566	not_sig	0.00581732	0.00324936	-0.000447339	0.00288577	0.147644	not_sig	-0.00064502	0.001011	0.00081828	0.0012999	0.362364	not_sig	0.0032912	0.0020396	-0.00025997	0.0017783	0.169222	not_sig
8	8569030	T	C	LDL	-0.0101	0.0019	6.554e-08	-0.0121	0.0021	1.544e-08	0.368	not_sig	-0.0120881	0.00338997	-0.011106	0.00311411	0.829381	not_sig	0.00656037	0.0035146	0.00369682	0.00312745	0.540964	not_sig	-0.0014162	0.0010969	-0.0016231	0.0014137	0.848926	not_sig	-0.0047639	0.0022129	-0.00069241	0.0019341	0.151998	not_sig
8	9183596	A	G	LDL	0.0598	0.0028	3.39e-104	0.0595	0.0032	1.327e-75	0.04294	not_sig	0.000144002	0.00510205	-0.00154781	0.00466303	0.804733	not_sig	0.00378021	0.00528842	-0.016214	0.00468276	0.00446838	not_sig	-0.001131	0.0016783	0.0040466	0.0021515	0.0735497	not_sig	-0.0085958	0.0033858	0.0010893	0.0029435	0.0234418	not_sig
8	9723964	A	T	LDL	0.0148	0.002	5.709e-14	0.008	0.0023	0.0004422	0.006432	not_sig	0.00443815	0.00360571	0.0115307	0.00330914	0.143251	not_sig	-0.0197741	0.00373767	-0.00651395	0.00332347	0.00774696	not_sig	-0.0006237	0.0011657	0.00086219	0.0015018	0.426362	not_sig	0.0023472	0.0023517	0.005216	0.0020546	0.29339	not_sig
8	10643233	T	G	LDL	0.011	0.0017	6.647e-11	0.0082	0.0019	2.35e-05	0.9856	not_sig	0.0199533	0.0029723	0.0184803	0.00272829	0.712306	not_sig	-0.0203281	0.00308141	-0.0114344	0.00274033	0.0302903	not_sig	-8.7913e-05	0.00096105	0.00028072	0.0012379	0.822959	not_sig	0.0084927	0.0019388	0.0031715	0.0016935	0.036716	not_sig
8	18273300	C	G	LDL	0.0153	0.0019	6.164e-16	0.0245	0.0022	1.85e-29	0.01498	not_sig	0.00211955	0.00350116	-0.00244717	0.00321616	0.331929	not_sig	0.00361999	0.00362951	-0.00344588	0.00323075	0.144135	not_sig	-0.00053779	0.0011465	-0.00079427	0.0014782	0.98966	not_sig	0.0021219	0.002313	0.00078713	0.0020224	0.660545	not_sig
8	21918089	A	C	LDL	-0.0212	0.0022	9.605e-23	-0.0195	0.0025	6.575e-15	0.831	not_sig	-0.00732795	0.00387044	-0.00696043	0.0035576	0.943706	not_sig	-0.0078441	0.00401235	-0.000559222	0.00357317	0.173236	not_sig	-0.00088381	0.0012489	0.0015472	0.0016103	0.234186	not_sig	-0.003794	0.0025195	-0.00061629	0.002203	0.326815	not_sig
8	23358480	T	TG	LDL	-0.0078	0.0017	4.06e-06	-0.0068	0.002	0.0008976	0.8717	not_sig	-0.00665171	0.00296898	0.00253062	0.00272244	0.0213117	not_sig	0.00398561	0.00307749	-0.00163507	0.00273422	0.170258	not_sig	NA	NA	NA	NA	NA	NA	NA	NA	NA	NA	NA	NA
8	29024943	A	G	LDL	0.0828	0.0077	1.076e-26	0.0676	0.0099	7.394e-12	0.1759	not_sig	0.00425681	0.0111024	-0.00643851	0.0102918	0.475481	not_sig	-0.00892793	0.0115092	-0.00502163	0.0103371	0.799785	not_sig	0.0010277	0.003598	4.6603e-05	0.0046831	0.835462	not_sig	-0.0052249	0.0072587	-0.0082616	0.0064068	0.708199	not_sig
8	55437524	A	G	LDL	0.0227	0.002	1.799e-29	0.0262	0.0023	1.398e-30	0.796	not_sig	-0.00118022	0.00360163	0.0029646	0.00330126	0.391508	not_sig	-0.000777074	0.0037335	0.000533644	0.00331558	0.792043	not_sig	0.00032746	0.001167	-0.00011157	0.0015	0.792835	not_sig	0.0082719	0.0023542	0.0013282	0.0020522	0.0216441	not_sig
8	59392324	A	G	LDL	0.032	0.0018	4.725e-72	0.0392	0.002	1.448e-83	0.2041	not_sig	-0.00225709	0.00309966	0.0076464	0.00285445	0.017601	not_sig	0.000349189	0.0032133	0.00975909	0.00286713	0.0281846	not_sig	-0.00017292	0.0010018	-0.00014619	0.0012941	0.957816	not_sig	-0.00074207	0.0020211	-0.0016676	0.0017705	0.693847	not_sig
8	61409871	T	G	LDL	-0.0134	0.0017	1.355e-15	-0.0085	0.0019	9.921e-06	0.01058	not_sig	0.00508934	0.00304284	0.00233764	0.00278349	0.500337	not_sig	0.00050796	0.00315454	-0.00184718	0.00279566	0.574656	not_sig	2.1459e-05	0.00098481	-0.0015776	0.0012639	0.386313	not_sig	-0.0021094	0.0019868	-0.00020711	0.0017291	0.453652	not_sig
8	74888494	T	C	LDL	0.0126	0.0018	2.142e-12	0.0174	0.002	1.28e-17	0.3412	not_sig	-0.00102373	0.00314715	0.000233809	0.00289118	0.766301	not_sig	-0.00337594	0.00326264	0.000899541	0.00290385	0.32551	not_sig	-0.001435	0.0010164	0.00051699	0.0013102	0.182089	not_sig	0.0038073	0.0020505	0.0017469	0.0017924	0.450844	not_sig
8	81357702	T	C	LDL	-0.0095	0.0019	3.62e-07	-0.0104	0.0021	1.025e-06	0.4186	not_sig	0.0111058	0.00321844	0.00901266	0.00295266	0.628349	not_sig	-0.0105724	0.00333639	-0.00162643	0.00296556	0.0441216	not_sig	5.8389e-05	0.0010408	-0.00046864	0.0013391	0.778737	not_sig	-0.0032218	0.0020998	-0.0032081	0.001832	0.953445	not_sig
8	116657911	T	G	LDL	-0.0227	0.0018	3.602e-36	-0.0237	0.0021	1.304e-30	0.3544	not_sig	-0.0170046	0.00327118	-0.0187861	0.00300329	0.685328	not_sig	0.00491457	0.00339135	0.00929447	0.00301638	0.33241	not_sig	0.00099052	0.001056	0.0040482	0.0013596	0.185873	not_sig	-0.00089198	0.0021303	-0.0010298	0.0018601	0.943447	not_sig
8	126500031	C	G	LDL	-0.0594	0.0017	3.5e-270	-0.0615	0.0019	7.93e-222	0.1672	not_sig	0.0120855	0.0030382	0.0101786	0.00278521	0.640282	not_sig	-0.00267239	0.00314945	-0.0277858	0.00279731	2.12241e-09	sig	0.00088787	0.00097128	0.0029611	0.001249	0.354645	not_sig	0.0023146	0.0019595	-0.00039458	0.0017087	0.273198	not_sig
8	145051484	T	C	LDL	-0.0229	0.0018	8.813e-39	-0.0234	0.002	1.736e-30	0.3867	not_sig	-0.00422326	0.00307615	0.00226818	0.00281118	0.115625	not_sig	0.00764788	0.00318886	0.00839758	0.00282366	0.859673	not_sig	9.5904e-05	0.00098926	0.00026564	0.0012682	0.944818	not_sig	0.00017594	0.0019957	0.0007479	0.001735	0.809316	not_sig
9	2640759	A	G	LDL	-0.0358	0.003	4.212e-32	-0.036	0.0035	7.275e-25	0.8166	not_sig	-0.00259693	0.00594477	-0.00093351	0.0054456	0.834914	not_sig	-0.0103142	0.00616208	-0.00670051	0.00547165	0.659612	not_sig	-0.00045154	0.0019064	0.00023095	0.0024497	0.807882	not_sig	-0.0072958	0.0038426	0.0022953	0.0033516	0.0468533	not_sig
9	16900695	A	G	LDL	-0.0148	0.0017	5.525e-18	-0.0136	0.002	3.875e-12	0.1536	not_sig	0.00088132	0.00302477	0.00192395	0.00277371	0.797482	not_sig	-0.000985418	0.0031358	0.00631441	0.00278754	0.0805457	not_sig	-0.00045878	0.00097793	0.001449	0.001257	0.254337	not_sig	0.0021444	0.0019711	0.0013699	0.0017197	0.779431	not_sig
9	19323815	A	G	LDL	-0.0278	0.0031	9.356e-20	-0.0381	0.0035	2.17e-27	0.02887	not_sig	0.00101527	0.00547522	0.00288049	0.00500848	0.799582	not_sig	-0.00317284	0.00567612	0.00164599	0.00503382	0.523491	not_sig	-5.3524e-05	0.0017738	0.0011984	0.0022754	0.702971	not_sig	-0.0023577	0.0035752	0.0043414	0.003113	0.12722	not_sig
9	22103341	T	G	LDL	-0.0148	0.0017	9.471e-19	-0.0075	0.0019	8.665e-05	0.2117	not_sig	-0.00594638	0.00292691	-0.00471374	0.00268972	0.754123	not_sig	0.00572603	0.0030344	0.00383942	0.00270317	0.641005	not_sig	0.00059462	0.00094785	-0.00069691	0.0012207	0.388197	not_sig	-0.0013423	0.0019105	-0.0027859	0.0016701	0.513007	not_sig
9	78212428	A	G	LDL	0.0154	0.0018	1.599e-17	0.0151	0.0021	4.908e-13	0.1933	not_sig	0.00246542	0.00319221	0.0012883	0.00292593	0.783649	not_sig	-0.00626128	0.00330971	-0.00105224	0.00294069	0.237309	not_sig	-0.00069578	0.0010337	-0.001287	0.0013278	0.879422	not_sig	-0.0024668	0.0020835	0.00030502	0.0018166	0.292601	not_sig
9	78729213	T	C	LDL	-0.0116	0.0017	7.064e-12	-0.0144	0.0019	4.056e-14	0.511	not_sig	0.00569119	0.00303663	-0.00115333	0.00279125	0.093713	not_sig	0.0038889	0.00314794	0.000191603	0.00280518	0.378457	not_sig	-0.0023787	0.00097847	-0.00053167	0.001261	0.122023	not_sig	7.0165e-05	0.0019722	0.0015242	0.0017253	0.541147	not_sig
9	91434086	A	G	LDL	0.021	0.0036	7.526e-09	0.0202	0.0041	7.23e-07	0.6659	not_sig	0.00136698	0.00612471	-0.00474978	0.0056448	0.458233	not_sig	0.00328742	0.00634884	-0.00162356	0.00567223	0.56233	not_sig	-0.0016607	0.0019732	-0.0022542	0.0025474	0.976074	not_sig	-0.0045143	0.0039771	-0.0024983	0.0034851	0.710105	not_sig
9	107664301	T	C	LDL	0.0227	0.0018	2.133e-35	0.0269	0.0021	7.551e-37	0.9707	not_sig	-0.00331747	0.00335722	-0.0081018	0.00308137	0.288939	not_sig	0.0117131	0.00348045	0.0189539	0.0030968	0.118499	not_sig	-0.0010681	0.0010895	0.00081564	0.0014018	0.25559	not_sig	0.0013551	0.0021961	7.9776e-05	0.0019179	0.649183	not_sig
9	117133524	A	G	LDL	0.019	0.0034	1.963e-08	0.0191	0.0036	1.564e-07	0.9779	not_sig	-0.00786808	0.00547197	0.00563089	0.00499694	0.0657733	not_sig	0.00552269	0.00567398	0.00374884	0.00502107	0.814089	not_sig	-0.00069687	0.0017209	0.00030455	0.0022071	0.689096	not_sig	-0.00070559	0.0034686	-0.0010617	0.0030196	0.925474	not_sig
9	131468740	A	G	LDL	0.0274	0.0025	1.988e-28	0.0298	0.0029	8.685e-25	0.6432	not_sig	-0.00284465	0.0041728	0.00406147	0.00380876	0.216952	not_sig	-0.00717209	0.00432624	-0.00709543	0.00382852	0.989366	not_sig	-0.00064948	0.0013495	-0.001355	0.0017279	0.865728	not_sig	-0.001082	0.0027201	0.0045521	0.0023639	0.0889098	not_sig
9	136149399	A	G	LDL	-0.0737	0.0021	8.2e-273	-0.0761	0.0024	2.47e-225	0.6705	not_sig	-0.00183121	0.00376679	-0.00845341	0.00345991	0.190952	not_sig	-0.0133856	0.00390496	0.00568778	0.00347651	0.000248086	not_sig	-0.00065893	0.0012303	-0.0020582	0.0015871	0.630098	not_sig	0.0040849	0.0024798	-0.0017226	0.0021713	0.0618669	not_sig
9	139371405	C	G	LDL	0.0165	0.0019	9.153e-18	0.0135	0.0022	8.398e-10	0.03199	not_sig	0.00688855	0.00327299	0.00166098	0.00300137	0.234439	not_sig	-0.00509363	0.00339307	0.0119871	0.00301655	0.000157586	not_sig	0.001002	0.0010603	-0.00020401	0.0013632	0.414664	not_sig	0.0045276	0.0021372	0.0027754	0.0018651	0.554798	not_sig
10	115798268	T	TAA	LDL	0.0134	0.0028	1.42e-06	0.0198	0.0033	2.703e-09	0.9157	not_sig	-0.00986627	0.00439963	-0.00047323	0.0040287	0.111748	not_sig	-0.00743599	0.0045617	-0.0135892	0.0040478	0.310872	not_sig	NA	NA	NA	NA	NA	NA	NA	NA	NA	NA	NA	NA
12	50127304	A	ATAATAT	LDL	0.0265	0.006	1.113e-05	0.0285	0.0071	5.568e-05	0.9389	not_sig	0.00815428	0.0128398	0.0112064	0.0118008	0.859684	not_sig	0.0031204	0.0133263	-0.0215195	0.0118309	0.164895	not_sig	NA	NA	NA	NA	NA	NA	NA	NA	NA	NA	NA	NA
13	32976656	G	GC	LDL	0.0245	0.0017	1.485e-44	0.0242	0.0021	6.712e-31	0.1037	not_sig	NA	NA	NA	NA	NA	NA	NA	NA	NA	NA	NA	NA	NA	NA	NA	NA	NA	NA	NA	NA	NA	NA	NA	NA
16	14395073	T	TG	LDL	0.0099	0.0019	1.1e-07	0.0102	0.0023	7.786e-06	0.9455	not_sig	NA	NA	NA	NA	NA	NA	NA	NA	NA	NA	NA	NA	NA	NA	NA	NA	NA	NA	NA	NA	NA	NA	NA	NA
2	203460202	T	TGGCTCACGCCTGTA	LDL	0.0216	0.002	2.316e-27	0.0232	0.0024	4.524e-22	0.6284	not_sig	0.00243912	0.00326102	-0.000536184	0.00298855	0.496883	not_sig	-0.00043742	0.00339226	0.00521507	0.00300524	0.210298	not_sig	NA	NA	NA	NA	NA	NA	NA	NA	NA	NA	NA	NA
3	122285218	CT	C	LDL	0.0128	0.0019	8.099e-12	0.0273	0.0022	4.953e-34	1.018e-05	sig	0.000291695	0.00319365	-0.00488638	0.00293014	0.227541	not_sig	0.000800226	0.00332136	0.00387034	0.0029431	0.487133	not_sig	NA	NA	NA	NA	NA	NA	NA	NA	NA	NA	NA	NA
1	2147162	T	C	logTG	0.011	0.0019	8.744e-09	0.0073	0.0022	0.001139	0.05547	not_sig	0.0108583	0.00349199	0.00880152	0.00321622	0.661678	not_sig	-0.00170459	0.00362927	0.00855423	0.00322852	0.0338971	not_sig	-0.00075888	0.0011267	0.00051626	0.001456	0.453339	not_sig	-3.7457e-05	0.0022819	-0.0005218	0.0019954	0.860125	not_sig
1	16508059	A	G	logTG	-0.0076	0.0017	6.097e-06	-0.0095	0.0019	7.086e-07	0.9569	not_sig	0.00167801	0.00299691	0.00766284	0.00276006	0.137884	not_sig	0.00295241	0.00311501	-0.00798544	0.0027706	0.00840691	not_sig	-0.0012074	0.00097712	-0.00050785	0.0012627	0.511686	not_sig	0.0014359	0.001979	0.00073293	0.0017304	0.792057	not_sig
1	26232356	A	C	logTG	-0.0075	0.0017	9.719e-06	-0.0108	0.0019	1.06e-08	0.3097	not_sig	-0.0040725	0.00296903	-0.00270152	0.00271821	0.730842	not_sig	-0.00965808	0.00308576	-0.0129061	0.00272851	0.428354	not_sig	7.5634e-05	0.00096758	-0.00014358	0.0012428	0.890433	not_sig	-0.0031619	0.0019596	-0.00053365	0.0017032	0.296006	not_sig
1	27021913	C	G	logTG	-0.0519	0.006	2.97e-18	-0.0862	0.0065	1.016e-40	0.002522	not_sig	0.00657268	0.00982459	0.0148856	0.00890627	0.526615	not_sig	-0.00866534	0.0102144	-0.0173837	0.00894055	0.51887	not_sig	-0.0051686	0.0031868	-0.00012839	0.0040583	0.226789	not_sig	-0.0046757	0.0064543	0.0016983	0.0055618	0.428466	not_sig
1	27688814	T	C	logTG	-0.0161	0.0049	0.0009137	-0.032	0.0053	1.786e-09	0.1304	not_sig	0.010555	0.00780019	0.0081572	0.007104	0.818437	not_sig	0.00443936	0.00810671	0.00385433	0.00713238	0.956601	not_sig	-0.0026711	0.002532	0.0013794	0.0032366	0.276454	not_sig	-7.0763e-05	0.0051282	0.002115	0.0044356	0.723603	not_sig
1	36021738	T	C	logTG	0.015	0.0031	1.132e-06	0.0176	0.0037	2.401e-06	0.6525	not_sig	-0.0171052	0.00933775	-0.000572219	0.00858587	0.188024	not_sig	0.0119191	0.00970289	0.0272567	0.00861349	0.23509	not_sig	-0.0018499	0.0030421	0.0063541	0.0039237	0.11776	not_sig	-0.0046473	0.0061612	0.00076505	0.0053773	0.486577	not_sig
1	39312160	A	G	logTG	-0.0074	0.0021	0.0005305	-0.0162	0.0024	2.756e-11	0.0005113	not_sig	0.000109011	0.00402105	0.00616904	0.00370353	0.262851	not_sig	0.00598708	0.00417996	-0.0186149	0.00371738	9.98646e-06	sig	0.00075598	0.0013109	0.0020815	0.0016933	0.685243	not_sig	0.0017708	0.0026549	-0.0031184	0.0023205	0.13476	not_sig
1	40035928	T	G	logTG	-0.0203	0.0022	3.75e-20	-0.0239	0.0024	3.878e-23	0.3696	not_sig	-0.0190739	0.00367544	-0.0155882	0.00336325	0.479759	not_sig	-0.002176	0.00382083	-0.0132634	0.00337609	0.0289515	not_sig	-0.0020527	0.0011969	0.0014037	0.0015371	0.0551234	not_sig	0.00010356	0.0024241	-0.0043353	0.0021066	0.129311	not_sig
1	51209148	T	C	logTG	-0.0253	0.0028	1.929e-19	-0.0236	0.0032	1.104e-13	0.8611	not_sig	0.00863561	0.00517563	0.00073867	0.00473144	0.255347	not_sig	-0.0160794	0.00537871	-0.0173044	0.0047498	0.863856	not_sig	-0.00035469	0.0016827	0.0018862	0.0021592	0.450816	not_sig	-0.0098963	0.003408	-0.0039268	0.0029591	0.182782	not_sig
1	54890956	T	G	logTG	0.0094	0.0017	2.175e-08	0.0147	0.0019	7.182e-15	0.1656	not_sig	-0.00440137	0.0029496	0.00421443	0.002706	0.0297	not_sig	0.00385956	0.00306583	0.00531395	0.00271633	0.721364	not_sig	3.4516e-05	0.00095888	-0.001895	0.0012344	0.282743	not_sig	-0.0020268	0.001942	0.0011546	0.0016917	0.18894	not_sig
1	61684630	A	G	logTG	0.0253	0.0031	1.222e-16	0.0174	0.0035	5.859e-07	0.01191	not_sig	0.00429688	0.00551269	-0.0125407	0.0050595	0.0230339	not_sig	-0.00951868	0.00573023	-0.0174417	0.0050781	0.298633	not_sig	0.00052037	0.0017958	-0.0012589	0.0023119	0.555119	not_sig	-0.0080265	0.003637	-0.0053345	0.0031684	0.602116	not_sig
1	62920008	A	G	logTG	-0.0787	0.0017	1.66e-450	-0.0685	0.0019	1.22e-271	0.0001637	not_sig	-0.00511366	0.00305051	-0.00816276	0.0028037	0.457286	not_sig	0.00545301	0.003171	-0.00727141	0.00281446	0.00257501	not_sig	0.00041405	0.00099392	-0.0019608	0.001282	0.174329	not_sig	0.00044191	0.002013	0.00029632	0.0017569	0.959533	not_sig
1	63433116	A	G	logTG	0.399	0.0396	7.805e-24	0.3104	0.037	4.977e-17	0.1114	not_sig	-0.00394035	0.048986	-0.0293632	0.0453824	0.700577	not_sig	-0.0443053	0.0509299	-0.0144887	0.0456638	0.661518	not_sig	NA	NA	NA	NA	NA	NA	NA	NA	NA	NA	NA	NA
1	64576995	T	C	logTG	0.1266	0.0302	2.801e-05	0.0719	0.0286	0.01193	0.3071	not_sig	-0.0364721	0.0402893	0.00113578	0.037707	0.491209	not_sig	0.0029814	0.041735	-0.0070126	0.037852	0.858597	not_sig	0.018899	0.012789	-0.0081169	0.016835	0.1507	not_sig	-0.0081326	0.025903	-0.0025874	0.023072	0.870815	not_sig
1	71397835	A	G	logTG	-0.0078	0.0017	3.145e-06	-0.0108	0.0019	1.089e-08	0.2611	not_sig	-0.00560793	0.00292923	-0.00657942	0.00268562	0.804973	not_sig	-0.00235173	0.00304474	-0.00431069	0.00269588	0.628506	not_sig	0.00043527	0.00095389	-0.001109	0.0012271	0.336716	not_sig	-0.0040216	0.0019319	3.5152e-05	0.0016817	0.0982226	not_sig
1	72835410	T	C	logTG	-0.0135	0.0022	6.402e-10	-0.0128	0.0024	1.746e-07	0.6863	not_sig	-0.0384684	0.00366165	-0.0254825	0.0033579	0.00828891	not_sig	0.00488089	0.00380631	-0.00316089	0.00337033	0.112115	not_sig	-0.00023647	0.001192	0.0017449	0.0015331	0.354628	not_sig	-0.0030943	0.0024142	-0.0050827	0.002101	0.461758	not_sig
1	91533297	A	G	logTG	-0.0137	0.002	1.679e-11	-0.0111	0.0023	1.493e-06	0.5082	not_sig	0.00181282	0.00366453	0.0077035	0.00335729	0.231237	not_sig	-0.00693334	0.00380953	0.00203934	0.00336992	0.0764073	not_sig	0.00063395	0.0011973	0.001268	0.0015396	0.871701	not_sig	0.00073755	0.0024249	0.0016087	0.0021099	0.756234	not_sig
1	93850283	A	C	logTG	-0.0121	0.0017	4.216e-13	-0.0105	0.0019	3.226e-08	0.5398	not_sig	-0.00162299	0.00297552	-0.00361403	0.00272772	0.61834	not_sig	-0.000668159	0.00309319	0.000587121	0.00273787	0.760198	not_sig	9.6285e-05	0.00096943	0.0010769	0.0012474	0.607488	not_sig	-0.00075708	0.0019634	-0.003896	0.0017095	0.179999	not_sig
1	98395881	T	G	logTG	0.0096	0.0022	9.996e-06	0.0188	0.0025	2.301e-14	0.02402	not_sig	0.0120667	0.00392068	0.021924	0.00360566	0.0615961	not_sig	0.00780414	0.00407534	0.0174048	0.00361943	0.0768639	not_sig	-0.0011059	0.001276	-0.0050083	0.0016463	0.154498	not_sig	0.0038059	0.0025844	0.0051483	0.0022562	0.623367	not_sig
1	109817192	A	G	logTG	-0.0107	0.0019	4.008e-08	-0.0137	0.0022	8.544e-10	0.3169	not_sig	0.00185139	0.00349697	0.00193915	0.00321419	0.98511	not_sig	0.000595613	0.00363518	0.00885965	0.00322658	0.0876892	not_sig	0.0014016	0.0011476	0.00052358	0.001479	0.496619	not_sig	0.0059099	0.0023242	0.0047391	0.0020269	0.755511	not_sig
1	149899389	A	G	logTG	0.0279	0.0033	1.609e-17	0.0221	0.0037	1.945e-09	0.2313	not_sig	0.00526586	0.00540744	0.00498625	0.00494884	0.969266	not_sig	0.0143523	0.00561882	0.00154537	0.00496724	0.0863077	not_sig	0.0023713	0.0017603	-0.00098029	0.0022614	0.189165	not_sig	0.0060518	0.0035652	0.0059515	0.0030992	0.962233	not_sig
1	154251626	A	G	logTG	-0.0123	0.0019	3.737e-11	-0.0166	0.0021	1.405e-15	0.4517	not_sig	0.00534244	0.00319327	-0.00237047	0.00293993	0.0726822	not_sig	-0.00531645	0.00331924	0.00201086	0.00295091	0.0975011	not_sig	0.0015829	0.0010393	0.0020362	0.0013424	0.911243	not_sig	-0.010884	0.0021047	-0.0034392	0.0018397	0.00670745	not_sig
1	155033334	A	G	logTG	-0.0125	0.0025	4.474e-07	-0.015	0.0028	1.191e-07	0.5156	not_sig	0.00926463	0.00426059	0.00384845	0.00391623	0.34449	not_sig	-0.000618755	0.00442802	-0.0162435	0.00393127	0.00804052	not_sig	0.0021649	0.0013875	0.000846	0.00179	0.393177	not_sig	0.00043182	0.0028102	-0.0015153	0.0024531	0.570665	not_sig
1	172361977	T	G	logTG	-0.0102	0.0017	9.383e-10	-0.0163	0.0019	8.536e-18	0.02156	not_sig	0.00254976	0.00294449	0.000643813	0.00269915	0.629843	not_sig	-0.0174351	0.0030607	-0.0372534	0.00270937	1.11728e-06	sig	-0.0014646	0.00095913	-0.0014339	0.0012336	0.718318	not_sig	-0.00054936	0.0019425	-0.0021299	0.0016906	0.492646	not_sig
1	184865132	A	T	logTG	0.0527	0.0073	5.734e-13	0.0496	0.008	4.938e-10	0.6296	not_sig	-0.015438	0.0122064	-0.0230856	0.01121	0.64115	not_sig	0.0147241	0.0126816	0.039641	0.0112485	0.139841	not_sig	-0.006209	0.0038233	-0.0073517	0.004882	0.835359	not_sig	-0.0031231	0.0077435	-0.001963	0.0066906	0.914212	not_sig
1	202184600	T	C	logTG	0.0085	0.0017	3.516e-07	0.0099	0.0019	1.681e-07	0.7974	not_sig	0.00061692	0.00297786	0.00547177	0.0027298	0.224803	not_sig	0.000976116	0.00309544	0.00530517	0.00274004	0.292885	not_sig	-0.0011746	0.00096882	0.00019252	0.0012464	0.307396	not_sig	0.0018682	0.0019622	0.00036133	0.0017081	0.550659	not_sig
1	203517292	A	G	logTG	-0.0117	0.0018	4.771e-11	-0.0164	0.0021	1.973e-15	0.003506	not_sig	0.0125479	0.00295598	0.00458801	0.00270822	0.044915	not_sig	0.00067773	0.00307263	-0.0202391	0.00271852	3.04063e-07	sig	0.0004372	0.00095805	0.00025328	0.0012315	0.837942	not_sig	-0.0011927	0.0019403	0.0017856	0.0016877	0.212443	not_sig
1	205070573	A	G	logTG	-0.0109	0.0017	1.246e-10	-0.0134	0.0019	5.051e-12	0.3406	not_sig	-0.00127778	0.00298154	-0.000901889	0.00273733	0.925266	not_sig	-0.00874062	0.00309958	-0.0191068	0.00274783	0.0119502	not_sig	0.001284	0.00097142	0.0028337	0.0012515	0.583992	not_sig	-0.004274	0.0019674	-0.00070679	0.0017151	0.158177	not_sig
1	219734960	A	C	logTG	-0.019	0.0018	1.197e-26	-0.0183	0.002	7.197e-20	0.9818	not_sig	0.00755784	0.00312606	0.00871947	0.00286923	0.782153	not_sig	-0.00670582	0.0032492	-0.0594979	0.00288018	2.67584e-34	sig	0.00024496	0.0010197	0.0020811	0.001314	0.368374	not_sig	0.003096	0.0020652	0.0017887	0.0018008	0.644198	not_sig
1	220970028	A	G	logTG	-0.0135	0.0018	1.671e-13	-0.0181	0.0021	4.053e-18	0.2823	not_sig	-0.00421277	0.00318144	8.40832e-05	0.00292356	0.315152	not_sig	-0.00125332	0.00330724	0.00019818	0.00293456	0.741602	not_sig	-0.00068022	0.0010379	0.00063611	0.0013383	0.412906	not_sig	0.00064687	0.0021021	0.0028929	0.0018341	0.369558	not_sig
1	228056868	T	C	logTG	-0.0084	0.0018	4.623e-06	-0.0077	0.0021	0.0003333	0.1108	not_sig	NA	NA	NA	NA	NA	NA	NA	NA	NA	NA	NA	NA	NA	NA	NA	NA	NA	NA	NA	NA	NA	NA	NA	NA
1	230294715	A	C	logTG	0.0418	0.0017	1.17e-137	0.0434	0.0019	1.68e-114	0.8855	not_sig	0.00502906	0.00298133	0.00969032	0.00273888	0.24485	not_sig	0.000515992	0.00309879	-0.00245516	0.00274925	0.471285	not_sig	0.00050755	0.00097224	0.0032415	0.0012533	0.170226	not_sig	-0.00033533	0.0019691	0.00040432	0.0017176	0.761194	not_sig
1	230823363	A	G	logTG	0.0203	0.004	3.544e-07	0.028	0.0045	5.981e-10	0.2438	not_sig	0.0188884	0.00689276	0.0140376	0.00632311	0.600411	not_sig	0.00824419	0.00716417	0.0100401	0.00634685	0.850512	not_sig	0.0015834	0.0021835	-0.00015306	0.0028114	0.558916	not_sig	0.0012473	0.0044223	-0.0024088	0.0038529	0.500873	not_sig
1	234848712	A	G	logTG	-0.0076	0.0017	9.844e-06	-0.01	0.0019	1.349e-07	0.1154	not_sig	0.00349063	0.00292203	-0.00164782	0.00268109	0.190616	not_sig	0.00107788	0.00303733	-0.00438867	0.00269113	0.176043	not_sig	-0.00017103	0.00095438	0.00094881	0.0012287	0.508008	not_sig	-0.0014088	0.0019329	-0.00040823	0.0016838	0.690251	not_sig
10	5267191	A	G	logTG	-0.0223	0.0023	7.649e-22	-0.0214	0.0026	1.708e-16	0.4849	not_sig	0.00907348	0.00404894	0.00474251	0.0037149	0.425976	not_sig	-1.91343e-06	0.00419851	-0.00723881	0.00373265	0.195705	not_sig	0.0020203	0.0013121	-0.00069871	0.0016871	0.148429	not_sig	0.0014934	0.0026442	2.8359e-05	0.002308	0.663482	not_sig
10	33633866	A	G	logTG	-0.0213	0.0026	3.476e-16	-0.0138	0.003	3.353e-06	0.38	not_sig	0.00057605	0.00504204	-0.00788684	0.0046453	0.212456	not_sig	0.0110568	0.00522724	-0.00213066	0.00466704	0.0587296	not_sig	-0.0020106	0.0016331	-0.0012681	0.0021086	0.605006	not_sig	0.005611	0.0032911	0.0029664	0.0028846	0.553103	not_sig
10	52573772	T	C	logTG	-0.088	0.0097	1.619e-19	-0.1029	0.0111	1.507e-20	0.9838	not_sig	-0.00663358	0.0148365	-0.0220037	0.0134257	0.437831	not_sig	-0.00127848	0.0153779	0.022546	0.0134892	0.242075	not_sig	0.0048714	0.0048092	0.0049706	0.0060988	0.827079	not_sig	-0.0066895	0.009692	0.0012153	0.0083433	0.515437	not_sig
10	61469090	T	C	logTG	-0.0144	0.002	4.531e-13	-0.017	0.0023	1.627e-13	0.6332	not_sig	0.000315987	0.00348046	-0.00376874	0.00318931	0.382134	not_sig	0.005695	0.00360848	-0.00380837	0.00320441	0.0479365	not_sig	-0.00072454	0.0011277	-0.0028202	0.0014483	0.40043	not_sig	0.00050361	0.0022727	-0.0016241	0.0019814	0.443631	not_sig
10	63837016	T	C	logTG	0.0085	0.0017	2.622e-07	0.0138	0.0019	1.959e-13	0.009685	not_sig	-0.00210411	0.00297283	-0.000144866	0.00272766	0.623784	not_sig	0.000144309	0.00308202	0.0202978	0.00274051	9.19251e-07	sig	-0.00071304	0.00096319	-0.0029564	0.0012385	0.285559	not_sig	-0.0028715	0.0019411	-0.0040214	0.0016943	0.581087	not_sig
10	65191645	T	G	logTG	0.0291	0.0016	9.446e-71	0.032	0.0018	5.354e-67	0.6125	not_sig	0.0115962	0.0029252	0.0146093	0.0026875	0.443589	not_sig	0.00543307	0.00303298	0.0133074	0.00270038	0.0514612	not_sig	-0.0005632	0.00094855	-0.0004699	0.0012215	0.85269	not_sig	0.0027805	0.0019116	0.003985	0.0016711	0.560854	not_sig
10	74710484	C	G	logTG	-0.0252	0.0025	4.343e-23	-0.0229	0.003	4.241e-14	0.4576	not_sig	-0.00234218	0.0051786	-0.00280307	0.00473359	0.947098	not_sig	0.0131854	0.00537038	0.0119094	0.0047561	0.858207	not_sig	-0.00078456	0.0016762	-0.0012281	0.002147	0.972123	not_sig	0.004011	0.0033779	0.0036876	0.0029371	0.976113	not_sig
10	77257376	T	C	logTG	-0.0097	0.0023	2.662e-05	-0.0182	0.0027	1.261e-11	0.09798	not_sig	-0.00560037	0.00440663	0.00821983	0.00405537	0.0197575	not_sig	0.00428868	0.00456929	-0.00414982	0.00407476	0.166231	not_sig	-0.001415	0.0014297	0.00040975	0.0018435	0.369063	not_sig	-0.0009408	0.0028813	0.0030664	0.002522	0.255916	not_sig
10	81094251	A	C	logTG	0.0098	0.0019	1.173e-07	0.0114	0.0021	1.135e-07	0.5346	not_sig	-0.0017426	0.00346472	-0.00407944	0.0031709	0.61528	not_sig	0.0036753	0.00359235	0.00252579	0.00318601	0.809976	not_sig	-0.00089434	0.0011234	0.0015925	0.0014407	0.175666	not_sig	0.00022761	0.0022639	6.565e-05	0.0019709	0.95606	not_sig
10	94215014	CTTGA	C	logTG	-0.0259	0.0031	2.558e-17	-0.0244	0.0035	5.866e-12	0.7404	not_sig	0.00888386	0.0047952	0.00621777	0.00441221	0.679417	not_sig	-0.00432116	0.00497056	-0.0104487	0.00443456	0.355515	not_sig	NA	NA	NA	NA	NA	NA	NA	NA	NA	NA	NA	NA
10	94839724	T	G	logTG	0.0283	0.0016	6.679e-67	0.0326	0.0019	2.771e-67	0.2189	not_sig	-0.00737678	0.00294118	-0.00852941	0.00269723	0.770491	not_sig	-0.00635704	0.0030493	0.00310572	0.00271019	0.0198192	not_sig	0.0008517	0.00095382	0.002543	0.0012258	0.459874	not_sig	0.0015152	0.0019222	-0.0026223	0.001677	0.0802593	not_sig
10	95342772	A	T	logTG	0.0106	0.0026	3.117e-05	0.0245	0.0029	4.36e-17	0.002427	not_sig	-0.000210971	0.00465361	-0.00475333	0.00428311	0.468193	not_sig	0.00394893	0.00482431	0.0327741	0.00430368	7.52154e-06	sig	1.8244e-05	0.0014966	0.001421	0.0019304	0.621734	not_sig	0.0017307	0.003016	0.0024467	0.0026408	0.825849	not_sig
10	96015793	C	G	logTG	-0.0125	0.0016	1.177e-14	-0.0095	0.0018	2.198e-07	0.05804	not_sig	0.0023664	0.00295356	0.00377519	0.00271064	0.722627	not_sig	-0.00816886	0.00306226	0.00165992	0.00272368	0.0160025	not_sig	-0.0001979	0.00095775	0.00077257	0.0012321	0.559555	not_sig	-0.0016962	0.0019301	0.0018077	0.0016855	0.142722	not_sig
10	101912194	T	C	logTG	-0.0098	0.0017	7.51e-09	-0.0118	0.0019	8.565e-10	0.7775	not_sig	0.00479373	0.00291833	-9.12513e-05	0.00268616	0.213506	not_sig	0.00860483	0.00302561	0.000649659	0.00269886	0.04875	not_sig	-0.00054694	0.00094648	0.0013022	0.0012208	0.244394	not_sig	0.0013655	0.0019074	0.0035269	0.0016701	0.333903	not_sig
10	104142294	A	G	logTG	0.0273	0.0035	1.275e-14	0.026	0.004	8.424e-11	0.3829	not_sig	0.00586673	0.00583131	0.00157719	0.00537202	0.584749	not_sig	0.00532947	0.00604508	-0.0083016	0.00539725	0.0911304	not_sig	0.00076027	0.0018886	-0.0010228	0.002436	0.55502	not_sig	-0.0029517	0.0038062	-0.0050499	0.0033326	0.625684	not_sig
10	113934384	C	G	logTG	-0.0155	0.0018	2.009e-17	-0.0204	0.0021	3.577e-23	0.2099	not_sig	-0.00564455	0.00327823	-0.00905607	0.00300258	0.438265	not_sig	0.00185947	0.00339912	0.00977836	0.00301707	0.0801129	not_sig	2.624e-05	0.0010636	0.0015469	0.0013647	0.45144	not_sig	-3.468e-05	0.0021434	-0.00036575	0.001867	0.897645	not_sig
10	115805056	C	G	logTG	0.0112	0.0018	1.248e-09	0.0111	0.0021	9.57e-08	0.9017	not_sig	0.000171796	0.0033616	0.00318099	0.00308024	0.505009	not_sig	-0.00805471	0.00348519	-0.00559916	0.00309515	0.596712	not_sig	7.2129e-05	0.0010837	0.00071697	0.0013927	0.763797	not_sig	0.0033757	0.002184	-0.00070606	0.0019053	0.138074	not_sig
10	120493295	A	G	logTG	-0.0108	0.0018	9.855e-10	-0.0091	0.002	4.708e-06	0.3347	not_sig	-0.00291309	0.00305484	0.00196627	0.00280545	0.234732	not_sig	-0.00607371	0.00316698	-0.00547499	0.00281897	0.88721	not_sig	0.00081432	0.0009906	-0.00071189	0.0012747	0.31663	not_sig	-0.0021471	0.0019963	-7.8859e-05	0.0017439	0.416501	not_sig
10	122929493	T	C	logTG	0.0296	0.0035	1.361e-17	0.0292	0.004	5.039e-13	0.6561	not_sig	-0.0039768	0.0100168	-0.00707747	0.00916834	0.817599	not_sig	0.00472126	0.0103883	0.0307982	0.00921098	0.0592249	not_sig	0.0018099	0.0032436	0.0045394	0.0041639	0.748464	not_sig	0.0027908	0.0065369	-0.0026607	0.0056963	0.50094	not_sig
10	134459388	A	G	logTG	0.0123	0.002	7.428e-10	0.0126	0.0023	2.59e-08	0.8079	not_sig	0.00995977	0.00352921	0.00773435	0.00323135	0.638534	not_sig	-0.00541447	0.00365883	-0.00385518	0.00324663	0.748835	not_sig	-0.00046286	0.0011445	-0.0026363	0.0014684	0.359422	not_sig	0.0068825	0.0023064	0.0015929	0.0020089	0.0757477	not_sig
11	380315	T	C	logTG	-0.0184	0.0049	0.0001488	-0.0334	0.0055	9.482e-10	0.08634	not_sig	0.0125486	0.00773627	-0.01054	0.00714249	0.0267696	not_sig	0.00687333	0.00801693	-0.0130241	0.00717554	0.0632377	not_sig	-4.966e-05	0.0025147	-0.0043669	0.0032536	0.366494	not_sig	0.0013866	0.005079	-0.0045653	0.0044527	0.338728	not_sig
11	10665235	T	C	logTG	0.0146	0.0019	2.156e-14	0.0132	0.0021	7.625e-10	0.8625	not_sig	0.0015492	0.00323146	-0.00267941	0.00295781	0.329574	not_sig	0.00344108	0.0033504	0.00503161	0.00297189	0.721307	not_sig	0.0024771	0.0010525	-0.0017524	0.0013497	0.00774115	not_sig	0.0026791	0.0021258	0.00011491	0.0018471	0.343166	not_sig
11	13361524	T	C	logTG	-0.0131	0.0017	3.578e-14	-0.0223	0.002	1.015e-29	0.007094	not_sig	-0.0132158	0.0031593	-0.013068	0.00289788	0.972221	not_sig	-0.00777276	0.00327568	-0.00900233	0.00291189	0.778112	not_sig	5.5731e-05	0.0010254	0.00082048	0.0013184	0.701643	not_sig	0.0022362	0.002071	0.0014821	0.0018043	0.797396	not_sig
11	13970901	T	G	logTG	0.0228	0.0052	9.998e-06	0.0272	0.0055	8.584e-07	0.2703	not_sig	NA	NA	NA	NA	NA	NA	NA	NA	NA	NA	NA	NA	NA	NA	NA	NA	NA	NA	NA	NA	NA	NA	NA	NA
11	14865399	T	C	logTG	0.2214	0.0321	4.97e-12	0.4184	0.0385	1.664e-27	0.001213	not_sig	-0.101071	0.055921	-0.162522	0.0500411	0.408179	not_sig	0.0863191	0.0579928	0.352553	0.050356	0.000498336	not_sig	-0.020434	0.014935	-0.022648	0.018918	0.81733	not_sig	0.023932	0.030164	-0.053781	0.025891	0.034411	not_sig
11	26197972	A	T	logTG	0.0195	0.0035	3.856e-08	0.0229	0.004	1.194e-08	0.3033	not_sig	0.0016514	0.0059815	0.00188823	0.00552953	0.976572	not_sig	0.0136334	0.00620139	0.0325133	0.0055563	0.0227576	not_sig	0.0019151	0.0019248	-0.0045179	0.0024936	0.0467158	not_sig	0.0011295	0.0038876	0.005098	0.0034127	0.39268	not_sig
11	27675712	T	C	logTG	0.0172	0.0017	1.762e-23	0.0128	0.002	5.465e-11	0.1084	not_sig	0.0308248	0.00313252	0.0264002	0.00286967	0.29281	not_sig	-0.00255059	0.00324805	0.00141571	0.00288329	0.359009	not_sig	-0.0013756	0.0010142	0.00012341	0.0013024	0.275959	not_sig	0.0097129	0.0020482	0.0066248	0.0017824	0.292688	not_sig
11	30402714	A	G	logTG	0.0186	0.0032	4.559e-09	0.0142	0.0035	5.01e-05	0.357	not_sig	0.0253229	0.00506621	0.0119471	0.00466853	0.0498705	not_sig	-0.00522971	0.00525296	0.00973948	0.0046905	0.0327619	not_sig	0.00026489	0.0016144	-0.0011441	0.0020841	0.618007	not_sig	0.0039464	0.0032606	0.0058595	0.0028522	0.59237	not_sig
11	47272579	A	G	logTG	-0.0244	0.0017	7.382e-46	-0.0198	0.002	7.466e-24	0.3212	not_sig	-0.00967067	0.00318235	-0.0074217	0.00291765	0.598789	not_sig	0.0106173	0.00329958	0.0025231	0.00293195	0.0654983	not_sig	-7.3108e-05	0.001032	0.0011373	0.0013264	0.523618	not_sig	0.002339	0.0020844	0.0029167	0.0018153	0.782308	not_sig
11	56119093	T	C	logTG	-0.0231	0.0038	1.363e-09	-0.0177	0.0043	3.185e-05	0.4215	not_sig	-0.0210658	0.00637644	-0.00160926	0.00581736	0.0227974	not_sig	0.00475124	0.0066098	0.00977229	0.0058451	0.567618	not_sig	-0.00068842	0.0020228	-0.0018814	0.002581	0.812806	not_sig	0.0029677	0.0040855	-0.0035704	0.0035322	0.193628	not_sig
11	57119156	T	C	logTG	0.0128	0.0025	5.017e-07	0.0143	0.0028	4.579e-07	0.6528	not_sig	0.0033487	0.00421596	0.00382661	0.00389009	0.932938	not_sig	0.00136082	0.00437086	0.0032564	0.00390886	0.745409	not_sig	-0.00069851	0.0013645	0.00050717	0.0017637	0.560394	not_sig	0.0051935	0.0027559	-0.0019055	0.0024137	0.0403098	not_sig
11	61588305	A	G	logTG	0.0533	0.0017	4.31e-208	0.0507	0.002	2.44e-146	0.3183	not_sig	-0.00203168	0.00307048	0.00788664	0.00281719	0.0162125	not_sig	-0.00860246	0.00318362	-0.00438129	0.00283086	0.319632	not_sig	-8.4694e-05	0.00099536	-0.00023355	0.00128	0.952066	not_sig	0.00025924	0.0020103	0.00080198	0.0017518	0.818879	not_sig
11	62378221	A	G	logTG	0.0072	0.0018	3.657e-05	0.016	0.002	8.115e-16	0.0002594	not_sig	-0.00466622	0.00302284	-0.0060074	0.00277678	0.741376	not_sig	0.00447727	0.00313453	0.0300318	0.00278983	9.55047e-10	sig	0.0012398	0.00098226	0.00017216	0.0012643	0.389835	not_sig	-0.0039627	0.0019839	0.0017674	0.0017303	0.0209774	not_sig
11	64004723	C	G	logTG	-0.0513	0.0041	5.564e-36	-0.0585	0.0046	2.455e-36	0.3647	not_sig	0.0209292	0.0072765	-0.0011869	0.00660761	0.0230443	not_sig	-0.0201251	0.00754828	-0.0896717	0.00663955	3.68979e-12	sig	0.00089858	0.0023133	-0.0030375	0.0029457	0.320391	not_sig	-0.013907	0.0046721	-0.0027635	0.0040313	0.0628851	not_sig
11	65473798	A	C	logTG	-0.0146	0.0017	9.165e-17	-0.0151	0.002	3.528e-14	0.3706	not_sig	0.00322233	0.00323429	-0.00628494	0.00296923	0.0287308	not_sig	-0.0111692	0.00335332	-0.0159132	0.00298367	0.288427	not_sig	-0.0011365	0.0010474	-0.0004506	0.0013476	0.554356	not_sig	-0.0031336	0.0021155	-0.0039656	0.0018442	0.698534	not_sig
11	68613864	T	C	logTG	0.0132	0.0017	1.623e-15	0.0137	0.0019	3.329e-13	0.8935	not_sig	0.0136885	0.00294342	0.00997761	0.00269668	0.347765	not_sig	-0.00320637	0.00305181	-0.00262419	0.00271009	0.886077	not_sig	0.0011847	0.00095378	0.00019243	0.0012251	0.405694	not_sig	-0.0027728	0.0019264	0.0010313	0.0016766	0.11487	not_sig
11	69305417	A	G	logTG	0.0081	0.0017	9.339e-07	0.0103	0.0019	4.963e-08	0.3414	not_sig	-0.0138349	0.00292878	-0.0142404	0.00269801	0.918078	not_sig	0.00453362	0.00303674	0.00786785	0.002711	0.41069	not_sig	0.00066935	0.0009488	0.0013714	0.0012248	0.815777	not_sig	0.0011254	0.0019163	-0.0010975	0.0016762	0.349891	not_sig
11	78072383	T	C	logTG	-0.0151	0.002	7.893e-14	-0.0101	0.0023	1.529e-05	0.02672	not_sig	-0.0163604	0.00398485	-0.00915637	0.00365093	0.178182	not_sig	0.00205303	0.00413185	0.00575043	0.00366818	0.501493	not_sig	-0.00016248	0.0012923	6.628e-05	0.0016596	0.902736	not_sig	0.0038056	0.00261	0.0036231	0.0022713	0.997822	not_sig
11	111623694	A	AAAAC	logTG	-0.0055	0.0018	0.002907	-0.0175	0.0022	6.546e-16	0.0007421	not_sig	0.00274579	0.00314466	0.000149266	0.00288363	0.538765	not_sig	-0.0085477	0.00326078	-0.0198963	0.0028976	0.00897354	not_sig	NA	NA	NA	NA	NA	NA	NA	NA	NA	NA	NA	NA
11	113579598	T	C	logTG	-0.0064	0.0029	0.0311	-0.0036	0.0034	0.2962	0.8971	not_sig	0.00915434	0.00672695	0.00735234	0.00620589	0.842364	not_sig	0.0108124	0.00697481	-0.00508058	0.00623385	0.0879246	not_sig	0.0035488	0.0021806	-0.0002305	0.0028192	0.199862	not_sig	-0.00025037	0.0044043	-0.0030961	0.0038582	0.591771	not_sig
11	114850006	T	C	logTG	-0.003	0.0017	0.07542	-0.0034	0.0019	0.08346	0.8208	not_sig	0.00444946	0.00307518	0.00232363	0.002818	0.606705	not_sig	-0.00392543	0.00318838	-0.00498675	0.00283163	0.802598	not_sig	-0.00062295	0.00099592	0.0016056	0.0012798	0.184406	not_sig	-0.00060181	0.0020115	-0.00044524	0.0017514	0.95849	not_sig
11	116139965	T	C	logTG	-0.0457	0.0072	2.833e-10	-0.0321	0.0079	4.75e-05	0.5566	not_sig	0.000321257	0.0105661	0.00838073	0.00974074	0.571084	not_sig	0.0176387	0.0109575	0.0166235	0.0097823	0.944656	not_sig	0.0034855	0.003435	-0.0084523	0.0044344	0.0387404	not_sig	0.0029775	0.0069377	-0.0056259	0.0060687	0.313657	not_sig
6	139831981	T	C	LDL	-0.0028	0.0017	0.0915	-0.0152	0.0019	1.3e-15	2.069e-05	sig	0.001128	0.00301562	0.00255694	0.00277508	0.724701	not_sig	-0.00675665	0.00312856	-0.0403182	0.00277972	7.96321e-16	sig	0.00063062	0.00097823	0.00053178	0.0012622	0.842745	not_sig	0.0015902	0.001976	0.0016144	0.001729	0.965275	not_sig
11	117220429	A	C	logTG	-0.9241	0.0241	3.15e-321	-0.8625	0.03	3.02e-181	0.002664	not_sig	-0.0694524	0.0463305	0.0236531	0.0457303	0.148553	not_sig	0.0407146	0.0480469	0.113616	0.0459532	0.270729	not_sig	NA	NA	NA	NA	NA	NA	NA	NA	NA	NA	NA	NA
11	117849058	C	G	logTG	-0.5629	0.0691	3.598e-16	-0.4251	0.0681	4.311e-10	0.9572	not_sig	0.118419	0.113392	-0.0747256	0.102671	0.202193	not_sig	-0.00695677	0.117593	-0.0823719	0.103171	0.62824	not_sig	NA	NA	NA	NA	NA	NA	NA	NA	NA	NA	NA	NA
11	119834755	T	G	logTG	0.2123	0.0427	6.471e-07	0.1471	0.0393	0.0001834	0.6305	not_sig	-0.0466205	0.0658073	-0.0266967	0.0581557	0.818762	not_sig	-0.0740721	0.0682454	0.00914581	0.0584392	0.352226	not_sig	NA	NA	NA	NA	NA	NA	NA	NA	NA	NA	NA	NA
11	120559994	A	C	logTG	0.3264	0.0507	1.226e-10	0.0869	0.0472	0.06576	0.003229	not_sig	0.0245086	0.08494	0.0227871	0.0753513	0.987782	not_sig	0.0329882	0.088087	-0.097424	0.0754772	0.258824	not_sig	NA	NA	NA	NA	NA	NA	NA	NA	NA	NA	NA	NA
12	508859	T	G	logTG	0.0074	0.0019	0.0001207	0.0109	0.0021	3.035e-07	0.4736	not_sig	-0.00204482	0.00332266	0.00373782	0.0030499	0.195316	not_sig	-0.00252778	0.00344495	0.0119099	0.00305669	0.00164009	not_sig	0.00094295	0.0010775	0.00063265	0.0013854	0.726578	not_sig	0.0013368	0.0021701	-0.00030721	0.0018947	0.547605	not_sig
12	4384844	T	G	logTG	-0.1132	0.0073	1.699e-54	-0.0857	0.0078	5.63e-28	0.000173	not_sig	0.0734387	0.0125474	0.015202	0.0115482	0.000561793	not_sig	-0.0381514	0.0130034	-0.0454344	0.0115676	0.674255	not_sig	NA	NA	NA	NA	NA	NA	NA	NA	NA	NA	NA	NA
12	6739497	T	C	logTG	-0.0104	0.002	1.247e-07	-0.0111	0.0022	4.426e-07	0.3652	not_sig	0.00231412	0.00333629	-0.00733011	0.0030691	0.031647	not_sig	0.000851131	0.00345893	0.00150069	0.00307658	0.88792	not_sig	0.0016075	0.0010693	0.00036523	0.0013778	0.3404	not_sig	-0.0041809	0.0021535	0.0024125	0.0018843	0.0142573	not_sig
12	20470199	A	G	logTG	-0.0157	0.0021	6.634e-14	-0.0231	0.0024	1.177e-22	0.1093	not_sig	0.00776306	0.00370528	0.00805808	0.00340436	0.952776	not_sig	0.000780399	0.00384113	-0.0182699	0.00341188	0.000195811	not_sig	0.0013271	0.0011971	0.0018629	0.0015407	0.990163	not_sig	0.001815	0.0024109	0.0047012	0.002107	0.306987	not_sig
12	21343833	A	C	logTG	0.0302	0.0023	5.297e-41	0.0219	0.0025	8.927e-18	0.05743	not_sig	0.00472978	0.00408813	-0.00260662	0.00376277	0.182309	not_sig	0.00642778	0.0042385	0.0124547	0.00377134	0.285974	not_sig	-0.0018302	0.0013232	-0.0015379	0.0017061	0.668677	not_sig	0.004112	0.0026649	-0.0041351	0.0023333	0.0126385	not_sig
12	22747967	T	G	logTG	-0.015	0.0021	1.859e-12	-0.0159	0.0023	4.325e-12	0.8747	not_sig	-0.00261262	0.00350719	-0.00556946	0.00322376	0.530698	not_sig	0.00450889	0.00363616	0.000326543	0.00323155	0.38784	not_sig	-0.0010689	0.0011211	-0.00030462	0.0014445	0.564964	not_sig	-0.0021598	0.0022578	-0.00034778	0.0019755	0.532744	not_sig
12	25409070	T	C	logTG	-0.0165	0.0034	1.494e-06	-0.0241	0.0039	5.789e-10	0.266	not_sig	-0.00173407	0.0056355	0.00145612	0.00519832	0.674278	not_sig	-0.00243554	0.00584301	0.00456073	0.00521037	0.369391	not_sig	-0.0012834	0.0018277	-0.00086097	0.0023609	0.779458	not_sig	-0.003372	0.003681	0.0010354	0.0032288	0.341695	not_sig
12	26472562	A	G	logTG	-0.0132	0.0018	4.763e-13	-0.0171	0.0021	1.011e-16	0.002485	not_sig	0.00134253	0.00341204	0.00583581	0.00313144	0.327099	not_sig	-0.0126051	0.0035378	-0.0497885	0.00313864	2.85928e-15	sig	0.0021163	0.0011049	0.0031163	0.0014201	0.96129	not_sig	0.0054217	0.0022253	0.0041024	0.0019421	0.696932	not_sig
12	29508642	A	G	logTG	-0.0116	0.0017	2.211e-11	-0.0135	0.002	1.367e-11	0.5214	not_sig	0.00219742	0.00325961	-0.00257211	0.00298636	0.275832	not_sig	0.00235458	0.00337916	-0.00231312	0.0029934	0.299021	not_sig	-0.00048971	0.0010554	0.0016512	0.001354	0.237636	not_sig	0.001726	0.0021255	0.00094493	0.0018518	0.786675	not_sig
12	46224063	A	G	logTG	0.0171	0.0022	2.253e-15	0.0136	0.0024	7.968e-09	0.5079	not_sig	0.000496177	0.00359851	0.00349847	0.00330375	0.534756	not_sig	0.00145294	0.00373067	-0.00193368	0.00331131	0.495293	not_sig	0.00089196	0.0011703	0.0015652	0.0015044	0.893909	not_sig	-0.0050024	0.002357	-0.0031305	0.0020574	0.569278	not_sig
12	48143315	A	G	logTG	0.0452	0.0083	5.534e-08	0.0401	0.0094	2.042e-05	0.03109	not_sig	0.0295192	0.0139936	0.0422235	0.0129806	0.501397	not_sig	-0.0526029	0.0145077	-0.104989	0.0130141	0.00693829	not_sig	0.0067585	0.0045556	0.01127	0.005913	0.849205	not_sig	0.021492	0.0091747	-0.010334	0.0080866	0.00575352	not_sig
12	49399132	C	G	logTG	-0.0288	0.0048	2.453e-09	-0.0285	0.0055	1.79e-07	0.838	not_sig	-0.0435538	0.00787894	-0.0257595	0.00725119	0.0932469	not_sig	0.0197826	0.00816954	0.0299773	0.00726599	0.348982	not_sig	0.0022159	0.0025586	-0.0046326	0.0032971	0.106914	not_sig	-0.012572	0.0051528	0.0088643	0.0045091	0.000843816	not_sig
12	53796754	A	G	logTG	-0.0117	0.0018	7.553e-11	-0.0061	0.0021	0.004294	0.1344	not_sig	0.000575414	0.0029546	-0.00509851	0.0027142	0.153166	not_sig	-0.0133444	0.00306335	-0.00148254	0.00272056	0.00363725	not_sig	NA	NA	NA	NA	NA	NA	NA	NA	NA	NA	NA	NA
12	56941146	A	C	logTG	0.0109	0.0017	3.128e-10	0.0107	0.002	5.836e-08	0.329	not_sig	-0.0111333	0.00308301	-0.00366984	0.00283406	0.0718367	not_sig	0.00591583	0.00319647	0.013879	0.00284026	0.0614148	not_sig	5.7291e-05	0.0009995	0.0010596	0.0012867	0.604192	not_sig	0.0054866	0.0020129	0.0019651	0.0017597	0.182277	not_sig
12	57823585	A	C	logTG	-0.0261	0.0019	3.208e-41	-0.022	0.0022	8.837e-24	0.01576	not_sig	0.00737363	0.00341725	0.00462167	0.00312704	0.548451	not_sig	-0.000741777	0.0035427	0.00186334	0.00313443	0.580151	not_sig	0.00059518	0.0011084	-0.0012861	0.0014203	0.306711	not_sig	0.0034017	0.0022323	0.001145	0.0019424	0.438645	not_sig
12	62838230	T	C	logTG	0.0124	0.0023	1.207e-07	0.0139	0.0026	1.123e-07	0.9685	not_sig	-0.00731419	0.00393508	-0.00329645	0.00362552	0.448187	not_sig	0.00408491	0.0040796	0.0141541	0.00363365	0.0641363	not_sig	-0.00092114	0.001269	0.0011665	0.0016366	0.30111	not_sig	-0.0042621	0.0025558	-0.0010554	0.0022382	0.333185	not_sig
12	63503447	T	C	logTG	0.0086	0.0018	9.611e-07	0.0115	0.0019	3.682e-09	0.1532	not_sig	-0.00136632	0.0031324	0.00675382	0.00288198	0.0539936	not_sig	-0.000329231	0.00324759	0.00248868	0.00288857	0.514916	not_sig	-0.00099676	0.0010061	0.000469	0.0012962	0.320019	not_sig	-0.0031725	0.0020262	0.0021501	0.0017727	0.0351238	not_sig
12	66206798	T	C	logTG	0.0123	0.0022	2.772e-08	0.0124	0.0026	1.723e-06	0.4315	not_sig	0.00377265	0.0043302	0.00237595	0.0039798	0.810431	not_sig	-0.0010456	0.00449014	-0.000664199	0.00398874	0.949142	not_sig	-0.0017794	0.0014007	0.00082415	0.0018019	0.203727	not_sig	0.0022273	0.0028209	0.0036695	0.0024642	0.648528	not_sig
12	69722880	T	C	logTG	-0.0088	0.0017	9.121e-08	-0.0104	0.0019	2.575e-08	0.5202	not_sig	-0.00948928	0.00294637	-0.010303	0.00269835	0.837011	not_sig	-0.00163625	0.00305424	-0.00496617	0.00270435	0.412291	not_sig	0.0011675	0.00095404	-0.00051193	0.0012239	0.226335	not_sig	-0.006829	0.0019213	-0.001346	0.0016738	0.026676	not_sig
12	107199142	A	G	logTG	-0.0119	0.0019	1.447e-10	-0.0216	0.0021	2.62e-24	0.009863	not_sig	0.00311016	0.00337333	0.0007507	0.00310411	0.603154	not_sig	-0.00609009	0.00349744	-0.0154686	0.0031112	0.0441803	not_sig	-0.00067191	0.001094	-0.00077682	0.0014102	0.930398	not_sig	0.0021007	0.0022033	0.00017817	0.0019286	0.495423	not_sig
12	109100503	T	C	logTG	-0.0068	0.0017	9.097e-05	-0.0117	0.002	2.161e-09	0.1041	not_sig	0.0075257	0.00305627	-0.00346638	0.00280463	0.00743855	not_sig	0.00201355	0.00316865	0.0019872	0.00281138	0.995015	not_sig	0.00049338	0.00099017	-0.0024598	0.0012727	0.0903793	not_sig	0.0034574	0.0019941	0.0050553	0.0017406	0.462166	not_sig
12	109709680	T	G	logTG	0.0155	0.002	1.535e-14	0.02	0.0023	3.913e-18	0.09125	not_sig	0.00434036	0.00376287	0.00358742	0.00345965	0.881726	not_sig	0.00174782	0.00390138	0.00107161	0.00346766	0.896471	not_sig	0.0010215	0.00122	-0.00067997	0.0015711	0.353858	not_sig	-0.0006829	0.0024571	0.0016472	0.0021486	0.439693	not_sig
12	111702646	A	G	logTG	-0.0107	0.0018	2.654e-09	-0.0125	0.0021	1.426e-09	0.5601	not_sig	0.00966313	0.00339411	0.00163223	0.00311155	0.0781267	not_sig	-0.00322568	0.00351889	-0.0116762	0.00311888	0.0710592	not_sig	0.00037373	0.0010994	0.00032416	0.0014119	0.919957	not_sig	-0.0042379	0.0022141	0.00076133	0.0019309	0.073457	not_sig
6	139835329	A	T	nonHDL	-0.0107	0.0022	7.431e-07	-0.0229	0.002	3.779e-30	0.0001213	sig	0.00126325	0.00301435	0.00272228	0.00277537	0.719098	not_sig	-0.00639599	0.00312725	-0.040442	0.00278	3.01849e-16	sig	0.00082416	0.00097794	0.00066807	0.0012624	0.784195	not_sig	0.0019104	0.0019754	0.0015701	0.0017293	0.918555	not_sig
12	123895906	C	G	logTG	-0.0058	0.0018	0.001661	-0.0143	0.0021	9.69e-12	0.0002966	not_sig	-0.00201401	0.00328763	0.00250595	0.00301464	0.30607	not_sig	-0.0105356	0.00340848	-0.0300817	0.00302157	1.63176e-05	sig	0.0016785	0.0010648	0.0036326	0.0013673	0.536408	not_sig	0.00053119	0.0021444	-0.00051217	0.0018699	0.694623	not_sig
6	139835498	T	C	logTG	-0.0212	0.0016	8.026e-39	-0.0329	0.0019	1.081e-70	5.93e-06	sig	0.00161242	0.00296267	0.00076806	0.00272489	0.832204	not_sig	-0.00694709	0.00307384	-0.0397329	0.00272952	1.14052e-15	sig	0.0007728	0.00096126	0.00037274	0.0012395	0.68835	not_sig	0.0017121	0.0019417	0.0006216	0.0016979	0.668764	not_sig
12	125312425	C	G	logTG	-0.0198	0.0021	1.045e-20	-0.018	0.0025	6.688e-13	0.4874	not_sig	-0.0050371	0.00418498	0.00705811	0.00383301	0.0313405	not_sig	0.000119928	0.00433892	-0.00697222	0.00384205	0.21902	not_sig	0.0013262	0.0013623	-0.0010506	0.001749	0.252308	not_sig	-0.00060743	0.0027436	-0.00017896	0.0023919	0.904386	not_sig
13	23908034	A	G	logTG	-0.0093	0.0016	1.223e-08	-0.0143	0.0019	1.457e-14	0.05523	not_sig	-0.00139414	0.00293829	0.00301789	0.0026987	0.263988	not_sig	-0.00462931	0.00304437	-0.0127031	0.00271424	0.0467817	not_sig	0.00073617	0.00095203	0.0015143	0.0012254	0.795606	not_sig	0.0038554	0.0019165	0.0018713	0.0016739	0.439498	not_sig
13	29145323	A	C	logTG	-0.0075	0.0017	1.522e-05	-0.0122	0.002	5.587e-10	0.1611	not_sig	0.00363513	0.00308045	2.55524e-05	0.00282561	0.383102	not_sig	-0.00444012	0.00319168	-0.0141665	0.00284219	0.0222605	not_sig	-0.00012575	0.00099702	4.2356e-05	0.0012817	0.906241	not_sig	-0.0037184	0.002007	-0.00046201	0.0017509	0.205433	not_sig
13	45970147	A	G	logTG	0.0721	0.0129	2.007e-08	0.0756	0.0155	1.09e-06	0.7332	not_sig	0.00101217	0.0184568	0.0119689	0.0168239	0.657669	not_sig	0.0351239	0.0191165	0.0474439	0.0169123	0.627807	not_sig	0.0002232	0.0060051	-0.0014229	0.0076737	0.877535	not_sig	-0.0020464	0.012089	0.0011484	0.010483	0.831854	not_sig
13	50655989	T	G	logTG	0.0469	0.0063	1.022e-13	0.054	0.0069	7.48e-15	0.8971	not_sig	-0.0220227	0.0112598	1.36337e-05	0.0102458	0.143728	not_sig	0.0401072	0.0116688	0.051929	0.0103054	0.445633	not_sig	-0.0013317	0.0035452	-0.00058237	0.0045335	0.843758	not_sig	-0.020113	0.0071365	-0.00087072	0.006193	0.0339974	not_sig
13	51172963	A	G	logTG	0.0137	0.0027	3.104e-07	0.0206	0.003	8.074e-12	0.1619	not_sig	-0.00689167	0.00504662	0.00751295	0.00461198	0.0333232	not_sig	0.0313579	0.00522911	0.0430428	0.00463886	0.0931534	not_sig	-0.0024505	0.0016331	-0.002241	0.0020924	0.6844	not_sig	0.0031345	0.0032876	0.0011535	0.0028583	0.645571	not_sig
13	95258944	T	C	logTG	-0.0197	0.0017	2.846e-30	-0.0148	0.002	4.088e-14	0.1674	not_sig	0.0037398	0.00315086	-0.000870285	0.0028919	0.276257	not_sig	0.00842527	0.0032648	0.0057544	0.00290872	0.539534	not_sig	-8.918e-05	0.0010211	0.00018626	0.0013134	0.870815	not_sig	6.4538e-05	0.0020555	0.0020299	0.0017941	0.427952	not_sig
13	111038379	T	C	logTG	-0.0108	0.0019	3.333e-08	-0.0106	0.0023	2.689e-06	0.6616	not_sig	NA	NA	NA	NA	NA	NA	NA	NA	NA	NA	NA	NA	-0.00042968	0.0010891	0.0027379	0.0013981	0.102745	not_sig	0.0011677	0.0021924	-0.00095902	0.00191	0.434555	not_sig
13	114551993	T	C	logTG	0.0256	0.0017	2.502e-49	0.0251	0.002	4.115e-36	0.04997	not_sig	-0.00201132	0.00313276	-0.00470766	0.00287369	0.521759	not_sig	0.00373659	0.00324592	0.00100438	0.00289023	0.527767	not_sig	-0.00060968	0.0010133	0.0004345	0.0013026	0.495392	not_sig	0.0011206	0.0020398	0.00022399	0.0017794	0.73305	not_sig
14	23685442	A	G	logTG	0.0097	0.0022	7.477e-06	0.0134	0.0025	6.913e-08	0.2163	not_sig	-0.00177617	0.00375134	-0.00432386	0.0034453	0.613402	not_sig	-0.000364202	0.00388602	0.00782042	0.00346328	0.114268	not_sig	0.00092836	0.0012112	0.0012273	0.001558	0.966717	not_sig	0.0034315	0.0024387	0.0030385	0.0021288	0.940296	not_sig
14	24560159	A	G	logTG	-0.0289	0.0075	0.0001086	-0.0443	0.0085	1.627e-07	0.4172	not_sig	-0.0131951	0.011933	-0.0183719	0.0109169	0.746468	not_sig	-0.00132441	0.0123584	-0.0178758	0.0109725	0.314452	not_sig	-0.0048448	0.0038434	0.0021314	0.0049313	0.21235	not_sig	-0.0083249	0.0077387	0.0024958	0.0067381	0.265347	not_sig
14	38848824	A	T	logTG	0.0084	0.0018	4.456e-06	0.0058	0.0021	0.005039	0.4335	not_sig	NA	NA	NA	NA	NA	NA	NA	NA	NA	NA	NA	NA	0.00014846	0.0010906	-0.001116	0.0014092	0.519702	not_sig	-0.001503	0.0021959	-0.0025638	0.0019255	0.66909	not_sig
14	50655357	C	G	logTG	0.0553	0.0099	2.381e-08	0.053	0.011	1.599e-06	0.9217	not_sig	0.0544097	0.0141269	0.0491356	0.012829	0.780125	not_sig	-0.00752261	0.0146331	0.00462473	0.0129001	0.531677	not_sig	-0.0022836	0.0045948	-0.003782	0.005831	0.9511	not_sig	-0.012082	0.0092516	-0.025804	0.0079673	0.197171	not_sig
14	52470889	A	G	logTG	0.01	0.0024	2.965e-05	0.0115	0.0027	2.155e-05	0.4826	not_sig	-0.00638457	0.00425219	-0.00277935	0.00390862	0.528378	not_sig	0.0113862	0.00440532	0.0126919	0.00392873	0.824173	not_sig	0.0014031	0.001377	-0.00015902	0.0017756	0.406719	not_sig	-0.0045095	0.0027727	0.00057213	0.0024261	0.147696	not_sig
14	60749118	C	G	logTG	-0.0093	0.0017	5.431e-08	-0.008	0.002	4.49e-05	0.2665	not_sig	0.00513857	0.00306466	-0.00131905	0.00281184	0.116826	not_sig	-0.000778453	0.0031754	0.00232238	0.00282621	0.463764	not_sig	-0.0015119	0.00099159	0.0021803	0.0012748	0.0204949	not_sig	0.0014153	0.0019966	0.0034371	0.0017419	0.385516	not_sig
14	64239629	T	G	logTG	0.0171	0.0021	6.866e-16	0.02	0.0025	1.74e-15	0.9095	not_sig	-3.52161e-05	0.00401111	0.00261464	0.00370229	0.623899	not_sig	0.00370055	0.00415585	-0.00345854	0.00372153	0.197405	not_sig	0.0015573	0.0012939	-0.0017414	0.0016727	0.10557	not_sig	-0.00060892	0.0026052	0.00081151	0.0022856	0.659546	not_sig
14	69285264	A	G	logTG	-0.0085	0.0016	2.572e-07	-0.0082	0.0019	1.006e-05	0.7239	not_sig	-0.00934029	0.00295814	7.00877e-05	0.00271792	0.0179772	not_sig	-0.00131866	0.00306477	0.0108758	0.00273219	0.00285286	not_sig	0.00025646	0.00095259	0.00099281	0.0012265	0.727147	not_sig	-0.0026207	0.001918	-0.00048683	0.0016759	0.387788	not_sig
14	89804856	A	G	logTG	0.0078	0.002	0.0001008	0.0147	0.0023	1.791e-10	0.03625	not_sig	-0.00541865	0.00370079	0.0093027	0.00341049	0.00313074	not_sig	-0.00933206	0.00383415	-0.0127532	0.00342858	0.504087	not_sig	-0.00060922	0.0012191	-0.00030665	0.0015759	0.80763	not_sig	-0.0012946	0.0024547	0.00043427	0.0021534	0.575652	not_sig
14	100765823	T	C	logTG	-0.0185	0.0034	4.62e-08	-0.0197	0.0039	3.8e-07	0.6165	not_sig	-0.0121379	0.00548106	-0.00558297	0.00503348	0.373627	not_sig	-0.0198517	0.00567967	-0.00110729	0.00506053	0.0133253	not_sig	0.0015701	0.0017795	0.002355	0.0022911	0.971968	not_sig	-0.0032671	0.003583	-0.010468	0.0031305	0.0890241	not_sig
14	104293533	T	C	logTG	0.0106	0.0017	9.459e-10	0.0126	0.002	1.553e-10	0.2645	not_sig	0.00257307	0.00310843	0.0167417	0.00284722	0.000686288	not_sig	0.00475581	0.00322054	0.00295677	0.002862	0.674923	not_sig	-0.0027131	0.0010048	0.00018001	0.0012898	0.0327004	not_sig	0.0067695	0.0020231	0.006111	0.0017623	0.896209	not_sig
15	31637666	T	C	logTG	0.0091	0.0023	9.179e-05	0.0142	0.0026	2.861e-08	0.5392	not_sig	-0.000272169	0.00391623	0.00528189	0.0035908	0.291047	not_sig	-0.00446682	0.00405476	0.00877599	0.00360874	0.0142676	not_sig	-0.0018612	0.0012642	0.0014652	0.0016231	0.0841056	not_sig	0.0022858	0.0025442	0.0024368	0.0022169	0.931044	not_sig
15	39447529	A	G	logTG	-0.0152	0.0021	4.873e-13	-0.0119	0.0024	6.043e-07	0.4087	not_sig	0.010188	0.00423548	0.00365319	0.0038747	0.250217	not_sig	0.00481203	0.00438512	-0.0209893	0.00389326	9.89958e-06	sig	-0.00086961	0.001342	0.00066617	0.0017188	0.450958	not_sig	0.0033306	0.0027009	-0.00012794	0.0023477	0.312256	not_sig
15	40400195	T	C	logTG	0.0113	0.0018	2.997e-10	0.0113	0.0021	1.044e-07	0.8658	not_sig	-0.00409095	0.00319074	-0.00662467	0.00293281	0.554846	not_sig	0.00404827	0.00330338	0.0119526	0.00294752	0.072928	not_sig	0.00096817	0.0010412	-0.0014332	0.0013404	0.1524	not_sig	0.0027421	0.0020954	-0.0010099	0.0018308	0.153578	not_sig
15	41057507	T	C	logTG	0.0215	0.0033	9.598e-11	0.0204	0.0035	5.821e-09	0.8388	not_sig	-0.00216996	0.00512181	0.00295067	0.00468576	0.456236	not_sig	0.00117411	0.00530188	0.00942286	0.00470917	0.242662	not_sig	-0.00065979	0.0016317	-0.0019753	0.0020921	0.736308	not_sig	0.00034707	0.0032838	0.0086754	0.0028575	0.0351645	not_sig
15	41880619	A	G	logTG	-0.0085	0.0018	1.942e-06	-0.0153	0.002	9.429e-14	0.121	not_sig	-0.00555925	0.00315658	-0.00170564	0.00289525	0.363492	not_sig	-0.00319989	0.00326819	-0.0137099	0.00291	0.0158498	not_sig	0.00051193	0.0010155	0.003561	0.0013052	0.139317	not_sig	-0.0034299	0.0020438	-0.0021149	0.0017827	0.643411	not_sig
15	44027885	T	C	logTG	0.1095	0.0054	8.02e-92	0.163	0.0061	1.75e-157	1.147e-05	sig	-0.0348779	0.00935842	-0.0196695	0.0085271	0.225014	not_sig	-0.00182498	0.00968764	0.0279752	0.00857187	0.0206725	not_sig	0.00023272	0.003015	0.0030957	0.0038547	0.626114	not_sig	0.00043693	0.0060679	0.0071599	0.005265	0.356271	not_sig
15	45001900	A	G	logTG	0.0143	0.0028	2.971e-07	0.0217	0.0032	5.971e-12	0.5213	not_sig	NA	NA	NA	NA	NA	NA	NA	NA	NA	NA	NA	NA	-0.002451	0.0014643	0.00031636	0.0018699	0.166711	not_sig	0.0037437	0.0029471	-6.6319e-06	0.002554	0.315521	not_sig
15	57297078	A	T	logTG	0.0317	0.0034	2.885e-20	0.0264	0.0038	2.906e-12	0.5276	not_sig	0.0190297	0.00564469	0.0193285	0.0052069	0.968651	not_sig	0.00441282	0.00584478	0.0103739	0.00523238	0.445318	not_sig	0.00041795	0.0018238	0.00055016	0.002357	0.989518	not_sig	0.0075429	0.0036705	0.003784	0.0032194	0.446938	not_sig
15	58723426	A	G	logTG	0.0344	0.0019	7.196e-76	0.0602	0.0022	1.69e-169	8.164e-10	sig	-0.00345135	0.00354825	-0.000126832	0.00325794	0.485746	not_sig	-0.0103863	0.00367341	-0.00414959	0.00327435	0.203023	not_sig	0.0005068	0.0011458	0.0015603	0.0014741	0.698241	not_sig	0.0026027	0.002306	0.00020167	0.0020134	0.415203	not_sig
15	59277019	T	C	logTG	0.1436	0.025	9.512e-09	0.2174	0.0256	1.768e-17	0.01219	not_sig	-0.138111	0.0765724	0.0364866	0.0684211	0.0859202	not_sig	-0.0411746	0.0792951	-0.0187966	0.0687679	0.830437	not_sig	NA	NA	NA	NA	NA	NA	NA	NA	NA	NA	NA	NA
15	61952501	A	G	logTG	-0.0097	0.0016	1.896e-09	-0.0095	0.0018	2.386e-07	0.6937	not_sig	0.00178183	0.00297389	-0.00244929	0.00273155	0.289891	not_sig	0.00207529	0.00307881	-0.011497	0.00274515	0.000950278	not_sig	0.00079853	0.00096138	-0.001707	0.0012371	0.116898	not_sig	0.0027432	0.0019348	-0.00079376	0.0016897	0.146006	not_sig
15	63793238	T	G	logTG	0.0232	0.0018	8.563e-39	0.0236	0.002	2.751e-31	0.8276	not_sig	-0.00878119	0.00308808	-0.0138068	0.00283833	0.226187	not_sig	0.00283485	0.00319722	0.0127315	0.00285235	0.020341	not_sig	-0.0020782	0.00099752	0.0020186	0.0012843	0.00818134	not_sig	0.0029894	0.0020076	-0.0012702	0.0017542	0.090375	not_sig
15	66872114	T	C	logTG	-0.0143	0.0017	1.274e-17	-0.0128	0.0019	1.787e-11	0.6544	not_sig	0.0119721	0.00305974	0.00889552	0.00281276	0.454648	not_sig	0.00301391	0.00316759	-0.00529854	0.00282673	0.049229	not_sig	-0.00095268	0.0009898	-0.00069006	0.0012749	0.721048	not_sig	-0.0011698	0.001992	-0.0033097	0.0017413	0.36128	not_sig
15	70189590	A	C	logTG	-0.0305	0.006	2.957e-07	-0.0178	0.0065	0.006287	0.3234	not_sig	0.0131745	0.050703	-0.0901765	0.0471166	0.131502	not_sig	-0.111752	0.0526575	-0.134762	0.0473554	0.744161	not_sig	NA	NA	NA	NA	NA	NA	NA	NA	NA	NA	NA	NA
15	72543084	A	G	logTG	0.0127	0.002	8.552e-11	0.0121	0.0022	2.334e-08	0.3194	not_sig	0.0114328	0.00345711	0.0104502	0.003163	0.832257	not_sig	0.00437009	0.00357941	-0.00216968	0.00317882	0.170023	not_sig	-0.00064267	0.0011177	0.0025013	0.0014325	0.104625	not_sig	0.0022521	0.0022493	0.0040842	0.0019567	0.473457	not_sig
15	73091283	T	G	logTG	-0.0118	0.0017	6.414e-12	-0.0092	0.002	2.692e-06	0.1406	not_sig	-0.0200565	0.00313072	-0.0149773	0.00286525	0.226725	not_sig	-0.00282062	0.00324147	0.00283918	0.00287953	0.189811	not_sig	7.4376e-05	0.0010108	0.00029619	0.001296	0.920438	not_sig	-0.0022891	0.0020343	-0.0015489	0.0017701	0.798915	not_sig
15	90214777	A	G	logTG	-0.1882	0.0348	6.21e-08	-0.2303	0.0455	4.166e-07	0.2771	not_sig	0.0996832	0.0581184	0.0811547	0.0563725	0.817199	not_sig	-0.175813	0.0600714	-0.250471	0.0566582	0.36381	not_sig	0.0091681	0.013197	0.013874	0.01762	0.974427	not_sig	0.026332	0.02656	0.0062217	0.024067	0.564995	not_sig
15	102068658	A	G	logTG	-0.016	0.0018	3.204e-18	-0.0152	0.0021	8.366e-13	0.2088	not_sig	-0.00267319	0.00338397	-0.00116561	0.00310659	0.74028	not_sig	-0.000706916	0.00350338	-0.00626434	0.00312213	0.234243	not_sig	-7.5851e-05	0.0010926	0.0018773	0.0014051	0.335483	not_sig	0.001226	0.0021988	-0.0040267	0.0019191	0.050686	not_sig
16	962154	T	C	logTG	-0.0129	0.0017	2.881e-14	-0.0127	0.0019	5.171e-11	0.4954	not_sig	0.00232062	0.00301625	0.000211962	0.0027752	0.603314	not_sig	-0.00185558	0.00313174	0.0108476	0.00279186	0.00235657	not_sig	0.00047361	0.00097702	0.00087862	0.0012594	0.912032	not_sig	0.0031768	0.0019675	0.00075908	0.0017205	0.342528	not_sig
16	4677604	A	C	logTG	-0.0179	0.0027	7.497e-11	-0.0149	0.003	9.762e-07	0.1867	not_sig	NA	NA	NA	NA	NA	NA	NA	NA	NA	NA	NA	NA	0.00065911	0.0014141	0.0016923	0.0018283	0.778206	not_sig	-0.00075116	0.0028477	-0.0012247	0.0024977	0.882129	not_sig
16	11839326	T	G	logTG	-0.0083	0.0017	7.374e-07	-0.0101	0.0019	9.445e-08	0.5879	not_sig	0.00356143	0.00303267	0.00102669	0.00278414	0.534016	not_sig	0.00446089	0.00314895	-0.00710348	0.00280072	0.00584732	not_sig	0.00033175	0.00097072	-0.0011494	0.001248	0.37573	not_sig	0.00054834	0.0019548	-4.501e-05	0.001705	0.810601	not_sig
16	15150505	A	C	logTG	0.0273	0.0019	2.356e-47	0.0257	0.0021	1.794e-33	0.1882	not_sig	0.000348547	0.00321777	0.0010891	0.00293999	0.863742	not_sig	0.00143127	0.00334099	0.00710139	0.00295752	0.201824	not_sig	0.0011775	0.0010425	0.003723	0.0013347	0.297412	not_sig	0.00080549	0.0020993	0.0032909	0.0018234	0.318248	not_sig
16	31110981	A	G	logTG	-0.0125	0.0017	1.024e-13	-0.0168	0.0019	3.02e-18	0.06135	not_sig	-0.0118461	0.00303614	-0.0271235	0.00278577	0.000180457	not_sig	0.00758845	0.0031521	0.000888629	0.00280213	0.110584	not_sig	0.0012651	0.00098469	0.0019449	0.0012655	0.938851	not_sig	-0.0037086	0.0019829	-0.0066246	0.0017289	0.195136	not_sig
16	49886366	T	C	logTG	-0.011	0.0023	1.738e-06	-0.0098	0.0027	0.0003095	0.7046	not_sig	0.00597104	0.00440403	0.00366662	0.00401892	0.696247	not_sig	-0.0210123	0.00457227	-0.0155663	0.0040429	0.370127	not_sig	0.0011484	0.0014305	-0.00095066	0.001828	0.336455	not_sig	0.0010074	0.0028807	0.0027901	0.0024973	0.597248	not_sig
16	53811788	A	G	logTG	0.0154	0.0017	9.613e-20	0.0159	0.0019	1.649e-16	0.2228	not_sig	0.0814739	0.00298823	0.0679426	0.00275108	0.000765769	not_sig	-0.00390099	0.00310232	0.00030957	0.00276757	0.309028	not_sig	-0.0017656	0.00096864	-0.0005366	0.0012494	0.279519	not_sig	0.0030312	0.0019506	0.00423	0.0017069	0.566911	not_sig
16	56990716	A	C	logTG	0.0316	0.0017	1.078e-73	0.0359	0.002	1.582e-72	0.8157	not_sig	0.0056911	0.00312689	0.0027456	0.00287235	0.483491	not_sig	-0.000398934	0.00324625	0.00882172	0.0028895	0.0330868	not_sig	0.00047263	0.0010164	0.0013703	0.0013082	0.71638	not_sig	-0.0013876	0.0020468	0.0044901	0.0017871	0.0188586	not_sig
16	67928042	A	G	logTG	0.0137	0.0024	7.372e-09	0.0191	0.0028	7.018e-12	0.1489	not_sig	0.00109376	0.00456888	-0.00211486	0.0042036	0.601663	not_sig	0.00607742	0.00474395	-0.00849718	0.00422855	0.0212484	not_sig	0.0010049	0.001483	0.00337	0.0019119	0.488944	not_sig	0.0019197	0.0029864	-0.0025162	0.002612	0.229524	not_sig
16	69686912	A	G	logTG	0.0165	0.0017	1.855e-21	0.015	0.0019	1.067e-14	0.9511	not_sig	0.024401	0.00298475	0.0208361	0.00274539	0.374595	not_sig	0.00646662	0.00309909	0.00934024	0.00276177	0.486861	not_sig	-0.0015106	0.0009657	-0.0024187	0.0012439	0.883787	not_sig	0.0025731	0.0019447	0.0072725	0.0016993	0.0399681	not_sig
16	72108093	A	G	logTG	-0.0183	0.002	3.26e-19	-0.0297	0.0023	1.514e-37	0.001349	not_sig	-0.0143847	0.00373409	-0.0126939	0.0034246	0.736069	not_sig	0.00546488	0.00387668	-0.00331529	0.00344501	0.089045	not_sig	0.0010075	0.001214	-0.00027125	0.0015594	0.455957	not_sig	-0.0028755	0.0024447	-0.0060621	0.0021304	0.259078	not_sig
16	79739978	C	G	logTG	-0.0133	0.0017	3.377e-14	-0.0086	0.002	1.397e-05	0.04496	not_sig	-0.00205608	0.00314971	0.00258811	0.00290058	0.273282	not_sig	-0.0137744	0.00327008	-0.00773975	0.00291818	0.166676	not_sig	-0.00018972	0.0010193	0.00042521	0.001315	0.717987	not_sig	0.001635	0.0020526	-0.0027049	0.0017965	0.0863851	not_sig
7	130429186	A	T	HDL	-0.0189	0.0016	7.677e-31	-0.043	0.0019	3.23e-119	3.819e-17	sig	-0.00706235	0.00295172	-0.00973676	0.00270151	0.499616	not_sig	-0.00777555	0.00306093	0.0348147	0.0027121	1.31513e-25	sig	0.00072557	0.00095334	-0.00065079	0.0012228	0.348421	not_sig	-0.0011534	0.001925	0.00073699	0.0016746	0.430057	not_sig
16	85150163	A	G	logTG	0.0184	0.003	9.458e-10	0.0208	0.0034	1.074e-09	0.7393	not_sig	NA	NA	NA	NA	NA	NA	NA	NA	NA	NA	NA	NA	NA	NA	NA	NA	NA	NA	NA	NA	NA	NA	NA	NA
16	86434553	T	C	logTG	0.011	0.0019	1.079e-08	0.0137	0.0022	3.826e-10	0.183	not_sig	-0.00771038	0.00352146	-0.000981219	0.00323327	0.155105	not_sig	0.00143147	0.00365645	0.00487582	0.00325255	0.479607	not_sig	-0.0010977	0.0011327	-0.00010753	0.0014571	0.49561	not_sig	-0.00024893	0.0022811	0.00041177	0.0019906	0.814038	not_sig
16	88006065	T	C	logTG	0.0112	0.0018	2.418e-10	0.0092	0.002	2.563e-06	0.803	not_sig	0.00898453	0.00292903	0.00565337	0.00268466	0.397092	not_sig	0.00489759	0.0030411	0.005147	0.00270066	0.950887	not_sig	-0.00036979	0.00094992	0.001799	0.0012195	0.19402	not_sig	0.00019695	0.0019129	0.0010947	0.0016661	0.694244	not_sig
17	481604	T	C	logTG	-0.0093	0.0022	1.71e-05	-0.0147	0.0025	3.502e-09	0.1026	not_sig	0.000881413	0.00381684	0.00344139	0.00350168	0.617643	not_sig	0.0110617	0.00395146	-0.00761404	0.00351287	0.000388377	not_sig	-0.00087413	0.0012331	-0.0025849	0.0015868	0.564881	not_sig	-0.00032778	0.0024823	0.0044809	0.0021682	0.110181	not_sig
17	1618363	T	C	logTG	0.0176	0.0021	9.344e-18	0.0204	0.0024	7.624e-18	0.7358	not_sig	-0.00609218	0.00375842	-0.00655273	0.00345285	0.927377	not_sig	0.0023494	0.00389089	0.00716483	0.00346372	0.353159	not_sig	0.0003389	0.0012168	-0.0016979	0.0015677	0.342548	not_sig	0.0020116	0.0024494	0.0029523	0.0021422	0.725069	not_sig
17	4692640	T	G	logTG	0.1312	0.0117	4.584e-29	0.1615	0.013	1.503e-35	0.01933	not_sig	0.0483481	0.0214633	-0.0181633	0.0204802	0.0235401	not_sig	0.00208506	0.0222137	-0.0336214	0.0205434	0.235883	not_sig	0.0069347	0.0068439	0.0014593	0.0091082	0.520844	not_sig	-0.0040583	0.013777	-0.020954	0.012446	0.311966	not_sig
17	7106378	A	G	logTG	0.0989	0.0158	3.57e-10	0.1321	0.0169	6.09e-15	0.03941	not_sig	-0.0249093	0.0250393	-0.00609299	0.0230082	0.576229	not_sig	-0.0225607	0.025901	-0.0278674	0.023071	0.877872	not_sig	NA	NA	NA	NA	NA	NA	NA	NA	NA	NA	NA	NA
17	17456746	A	G	logTG	-0.0223	0.0031	1.27e-12	-0.0344	0.0037	1.489e-20	0.02713	not_sig	0.0194846	0.00618369	-0.00581531	0.00563564	0.00225563	not_sig	-0.0090354	0.00640118	-0.0376618	0.00565429	0.000761322	not_sig	-0.0015972	0.0019928	0.00079763	0.0025487	0.412556	not_sig	0.0055588	0.0040115	-0.0073884	0.0034826	0.00878964	not_sig
17	26694861	A	G	logTG	0.0095	0.0016	3.542e-09	0.0136	0.0019	2.182e-13	0.0915	not_sig	-0.00417384	0.00293208	-0.00421634	0.00268962	0.991392	not_sig	0.000601063	0.00303562	0.00714469	0.00269824	0.105606	not_sig	0.0005644	0.00095097	0.0019157	0.001223	0.535557	not_sig	-0.0011953	0.0019143	0.00082982	0.0016711	0.395548	not_sig
17	27889643	T	C	logTG	-0.0229	0.0066	0.0004768	-0.0604	0.0078	9.781e-15	0.0003612	not_sig	0.0312015	0.0110018	0.0312833	0.0101694	0.9956	not_sig	-0.00722456	0.0113886	-0.0794195	0.0102059	2.11834e-06	sig	-0.0040816	0.0036064	0.0047377	0.0046842	0.122577	not_sig	-0.0088548	0.0072597	-0.0031589	0.0064008	0.551201	not_sig
17	34841617	T	G	logTG	-0.0077	0.0016	1.915e-06	-0.0102	0.0019	4.463e-08	0.2123	not_sig	-0.0159416	0.00294102	-0.0148619	0.00269635	0.784605	not_sig	-0.00307831	0.00304486	-0.0107791	0.00270504	0.0575527	not_sig	-0.00033054	0.00094991	0.00035268	0.0012212	0.645783	not_sig	-0.0051557	0.0019122	0.00049771	0.0016687	0.0195324	not_sig
17	40731597	A	T	logTG	-0.012	0.0018	1.832e-11	-0.0161	0.002	2.177e-15	0.7424	not_sig	-0.0163074	0.00324776	-0.00684638	0.00297609	0.0300583	not_sig	-0.00988556	0.00336177	-0.0153662	0.00298591	0.220843	not_sig	0.00081177	0.0010497	0.0025889	0.0013489	0.469375	not_sig	0.0010373	0.0021132	-2.18e-06	0.0018432	0.698861	not_sig
17	41387617	A	G	logTG	0.0141	0.0019	1.363e-13	0.0121	0.0022	4.833e-08	0.6426	not_sig	0.00282307	0.00299627	-0.000106112	0.00275715	0.467461	not_sig	0.00705584	0.00310216	0.00582288	0.00276584	0.765725	not_sig	NA	NA	NA	NA	NA	NA	NA	NA	NA	NA	NA	NA
17	41926126	T	C	logTG	-0.1551	0.005	1.12e-207	-0.1405	0.0058	1.51e-129	0.07458	not_sig	0.0073565	0.00842642	0.0185777	0.00767241	0.319957	not_sig	-0.00671985	0.00872567	-0.0116038	0.00770013	0.67337	not_sig	-0.0034351	0.0027242	-0.0011531	0.0034809	0.465418	not_sig	0.0052808	0.0054838	-0.004844	0.0047565	0.135605	not_sig
17	42626279	A	G	logTG	-0.0832	0.0133	4.08e-10	-0.0664	0.0136	1.1e-06	0.9328	not_sig	0.00588024	0.0239268	0.0250268	0.0217832	0.550063	not_sig	0.0294487	0.0247525	-0.00435007	0.0218383	0.303743	not_sig	-0.0042129	0.0074135	-0.010614	0.0094787	0.740965	not_sig	-0.011817	0.014923	-0.033714	0.012952	0.211087	not_sig
17	45697549	C	G	logTG	0.0087	0.0016	8.774e-08	0.0102	0.0019	4.138e-08	0.09949	not_sig	-0.00020758	0.00293182	0.00579769	0.00268479	0.12706	not_sig	-0.000397607	0.00303517	-0.00768297	0.00269364	0.071357	not_sig	-0.001688	0.00094775	-0.0036228	0.0012171	0.495539	not_sig	0.0015035	0.0019079	0.0039157	0.0016631	0.280206	not_sig
17	46197755	A	G	logTG	0.0158	0.0018	6.149e-18	0.0153	0.0021	5.501e-13	0.4517	not_sig	-0.00628782	0.00343352	-0.0101722	0.00314681	0.399562	not_sig	0.00794746	0.00355421	0.00450134	0.00315683	0.466535	not_sig	0.00029856	0.0011098	-0.00045059	0.0014266	0.67563	not_sig	0.0011675	0.0022341	0.00097697	0.0019494	0.961019	not_sig
17	47450775	A	G	logTG	-0.0156	0.0017	4.318e-21	-0.0136	0.0019	3.654e-13	0.9787	not_sig	-0.0125855	0.00296962	-0.00373235	0.00271696	0.0263068	not_sig	0.000550193	0.00307453	-0.0110557	0.00272593	0.00455387	not_sig	0.00015628	0.00095617	6.8865e-05	0.001227	0.931996	not_sig	-0.0042574	0.0019248	-0.0054812	0.0016766	0.536081	not_sig
17	48624523	A	C	logTG	-0.009	0.0017	1.562e-07	-0.0079	0.002	6.32e-05	0.3527	not_sig	-0.00126899	0.00303889	-0.00445454	0.0027888	0.435335	not_sig	0.00307617	0.00314594	0.00220365	0.00279772	0.835101	not_sig	0.0018209	0.00098082	0.0015363	0.0012624	0.567646	not_sig	0.00021903	0.0019744	0.001818	0.001725	0.499918	not_sig
17	49338257	T	C	logTG	0.0116	0.0027	1.845e-05	0.0168	0.003	1.842e-08	0.2988	not_sig	-0.00124789	0.00461042	-0.000686936	0.0042233	0.927794	not_sig	0.00731009	0.00477321	0.0172228	0.00423696	0.118765	not_sig	0.00047362	0.0015023	-0.0014969	0.0019314	0.443495	not_sig	-0.0017817	0.0030242	0.00035446	0.0026392	0.575345	not_sig
17	55210713	A	G	logTG	-0.0097	0.0017	1.422e-08	-0.0115	0.0019	3.372e-09	0.3058	not_sig	0.0057688	0.00311273	0.000383596	0.00285033	0.197483	not_sig	-0.000521101	0.00322229	0.000784595	0.00285978	0.760821	not_sig	0.0022161	0.001001	0.00069726	0.0012852	0.192379	not_sig	0.0030108	0.002015	0.0020934	0.0017562	0.752807	not_sig
17	57925649	A	G	logTG	0.017	0.002	9.195e-18	0.0135	0.0022	1.258e-09	0.04511	not_sig	0.00602362	0.00357244	0.00127265	0.00329583	0.323501	not_sig	-0.00985423	0.00369839	0.00771564	0.00330654	0.000374747	not_sig	-0.0032076	0.0011538	-0.00065463	0.0014929	0.0728606	not_sig	-0.0081793	0.0023226	-0.0011107	0.00204	0.0179872	not_sig
17	64210580	A	C	logTG	-0.0756	0.0053	1.459e-46	-0.0403	0.0062	8.632e-11	0.0003098	not_sig	-0.00592641	0.00854226	-0.0047396	0.00786429	0.917771	not_sig	-0.00600315	0.0088435	0.012378	0.0078894	0.119269	not_sig	-0.0071197	0.0027644	0.00087168	0.0035685	0.0349911	not_sig	0.0018396	0.0055649	-0.0031521	0.0048762	0.466974	not_sig
17	65272255	A	G	logTG	-0.0071	0.0018	7.672e-05	-0.0113	0.002	2.475e-08	0.04217	not_sig	0.00269828	0.00315968	-0.004937	0.00290434	0.0723414	not_sig	-0.00734187	0.00327081	-0.0101729	0.00291416	0.516271	not_sig	-0.0012097	0.0010252	-0.00093728	0.0013215	0.684704	not_sig	-0.0019815	0.0020637	-0.0049319	0.0018057	0.221759	not_sig
17	65980289	A	G	logTG	0.0214	0.0019	4.6e-29	0.0253	0.0022	2.746e-30	0.3426	not_sig	0.0153322	0.0036453	0.0175672	0.00334051	0.647981	not_sig	0.00383985	0.00377394	0.0104363	0.00335124	0.18927	not_sig	-0.0028603	0.0011765	-0.0024804	0.0015119	0.472329	not_sig	0.0070297	0.0023683	0.0030397	0.0020659	0.203576	not_sig
17	67081278	A	G	logTG	-0.0412	0.0065	1.678e-10	-0.0539	0.0072	7.826e-14	0.263	not_sig	-0.00841946	0.00984063	-0.00302629	0.00901642	0.683167	not_sig	-0.0316987	0.0101868	-0.0280287	0.00904632	0.786721	not_sig	0.0020228	0.0032436	-0.00020332	0.0041736	0.614235	not_sig	0.0050695	0.0065294	-0.0010416	0.005703	0.457988	not_sig
17	68431026	T	C	logTG	0.0094	0.0016	5.925e-09	0.0137	0.0018	9.659e-14	0.1121	not_sig	-0.00289623	0.00294271	-0.0091333	0.00269549	0.11442	not_sig	0.00309099	0.00304639	0.0403198	0.00270397	4.31079e-20	sig	-0.00092097	0.00094941	-0.0001577	0.0012192	0.518987	not_sig	-0.0015315	0.0019112	-0.0013417	0.0016659	0.960981	not_sig
17	70295760	A	G	logTG	-0.0092	0.0016	1.355e-08	-0.0071	0.0018	9.658e-05	0.2028	not_sig	-0.00351193	0.00295851	-0.00652808	0.00271354	0.447931	not_sig	0.0144439	0.00306296	0.0131361	0.00272219	0.748548	not_sig	0.0018169	0.00095434	0.00077166	0.0012272	0.312905	not_sig	0.00055918	0.0019211	0.00061042	0.0016769	0.972739	not_sig
17	73272060	A	T	logTG	-0.0131	0.0019	4.67e-12	-0.0076	0.0023	0.0009419	0.1209	not_sig	NA	NA	NA	NA	NA	NA	NA	NA	NA	NA	NA	NA	NA	NA	NA	NA	NA	NA	NA	NA	NA	NA	NA	NA
17	74268619	T	C	logTG	0.0111	0.0018	3.081e-10	0.0134	0.002	2.368e-11	0.1639	not_sig	0.000558136	0.00316122	0.00474014	0.00289555	0.324459	not_sig	0.0132801	0.00327308	0.0127143	0.00290491	0.896678	not_sig	-0.0010264	0.0010199	-0.00033043	0.0013099	0.556138	not_sig	-0.00099442	0.0020531	0.00084897	0.0017899	0.469433	not_sig
17	76395750	T	C	logTG	0.0201	0.0016	6.258e-35	0.0169	0.0019	9.668e-20	0.5235	not_sig	0.0066327	0.00299932	0.00482306	0.00275259	0.653436	not_sig	0.00457805	0.00310522	0.00154162	0.00276144	0.46299	not_sig	-0.00088476	0.00096942	-0.00054278	0.0012471	0.694776	not_sig	0.0026452	0.0019515	0.0016395	0.0017041	0.711281	not_sig
17	80052073	A	G	logTG	-0.0084	0.0017	5.78e-07	-0.012	0.0019	5.51e-10	0.5292	not_sig	-0.00763338	0.00295342	-0.0128678	0.00271083	0.187228	not_sig	-0.00287208	0.00305756	-0.0103443	0.00271947	0.0666345	not_sig	-0.001306	0.00095387	0.001759	0.0012278	0.0443747	not_sig	-0.0029307	0.0019202	-0.0032025	0.0016777	0.856753	not_sig
18	293519	A	G	logTG	0.0162	0.0027	1.884e-09	0.0192	0.0032	2.258e-09	0.7968	not_sig	-0.000305976	0.00528091	0.00396641	0.00486114	0.547694	not_sig	0.011293	0.00547387	-0.00481789	0.00488988	0.0274775	not_sig	-0.00091871	0.0017259	0.0019032	0.0022288	0.324811	not_sig	-0.0012975	0.0034738	-0.0048655	0.0030438	0.38751	not_sig
18	2846812	A	T	logTG	-0.0088	0.0019	2.336e-06	-0.0136	0.0022	3.267e-10	0.02903	not_sig	NA	NA	NA	NA	NA	NA	NA	NA	NA	NA	NA	NA	-0.0017873	0.0010041	-0.0016435	0.0012909	0.633586	not_sig	0.0015855	0.002021	-0.00040739	0.0017629	0.433162	not_sig
18	13725674	A	C	logTG	0.0121	0.0017	2.022e-12	0.0093	0.002	3.062e-06	0.03908	not_sig	-0.00158218	0.00309296	0.00161476	0.00283497	0.441522	not_sig	0.00203622	0.0032059	0.00130009	0.00285146	0.863179	not_sig	-0.00010538	0.0010002	-0.00029985	0.0012859	0.936757	not_sig	-3.1942e-05	0.0020132	0.0013224	0.0017561	0.578	not_sig
18	19905141	T	C	logTG	0.0126	0.0017	5.49e-14	0.0098	0.0019	1.553e-07	0.414	not_sig	-0.00397487	0.00294503	-0.001071	0.00270347	0.463144	not_sig	-0.00492316	0.00305263	-0.00334622	0.00271909	0.698424	not_sig	0.00071576	0.00095158	0.0012011	0.0012253	0.919591	not_sig	-0.0032866	0.0019153	-0.0014199	0.0016732	0.462292	not_sig
18	21143739	T	G	logTG	-0.0132	0.0016	6.921e-16	-0.018	0.0019	1.119e-21	0.06389	not_sig	-0.0236928	0.0029347	-0.0165437	0.00268901	0.0696549	not_sig	-0.0039662	0.00304182	-0.0037505	0.00270461	0.957551	not_sig	0.00067878	0.0009489	0.0055995	0.0012196	0.00964695	not_sig	0.0017267	0.0019099	0.00099891	0.0016655	0.781058	not_sig
18	29772887	T	C	logTG	0.1935	0.0315	7.883e-10	0.1816	0.0366	6.716e-07	0.1033	not_sig	NA	NA	NA	NA	NA	NA	NA	NA	NA	NA	NA	NA	NA	NA	NA	NA	NA	NA	NA	NA	NA	NA	NA	NA
18	42599167	A	G	logTG	-0.0113	0.0017	3.293e-11	-0.0049	0.0019	0.01198	0.01608	not_sig	0.0148668	0.0031955	0.0117818	0.0029357	0.472701	not_sig	-0.00609451	0.00331214	-0.0146116	0.0029527	0.0538613	not_sig	-0.0010987	0.0010338	-0.00048358	0.0013321	0.579483	not_sig	0.0013944	0.0020808	0.0014391	0.0018191	0.96363	not_sig
18	56089858	T	G	logTG	-0.0516	0.0093	3.057e-08	-0.0623	0.0104	1.951e-09	0.8575	not_sig	0.0312785	0.0144916	0.015772	0.0134792	0.428719	not_sig	0.00500783	0.0150187	-0.0373335	0.0135554	0.0355442	not_sig	-0.0078197	0.0045357	0.0079677	0.0059159	0.0264976	not_sig	-0.0013726	0.0091293	-0.0065127	0.008079	0.638851	not_sig
18	57861961	A	G	logTG	-0.0128	0.0018	1.347e-12	-0.0161	0.0021	4.937e-15	0.7368	not_sig	-0.0483917	0.00332534	-0.0500384	0.00304524	0.712224	not_sig	0.0136202	0.00344634	-0.0065075	0.0030625	1.16014e-05	sig	-0.00039311	0.0010739	0.0015497	0.0013797	0.297524	not_sig	-0.0050153	0.0021615	-0.00071654	0.0018841	0.120997	not_sig
18	60845884	T	C	logTG	-0.0134	0.0017	3.839e-15	-0.0159	0.002	7.419e-16	0.2691	not_sig	0.0153859	0.00302211	0.0116195	0.00277315	0.353669	not_sig	-0.00140293	0.00313258	-0.0306554	0.00278917	2.46891e-12	sig	0.0020864	0.00098033	0.0014875	0.0012616	0.422165	not_sig	0.0022235	0.0019732	-0.0021535	0.0017229	0.0736351	not_sig
19	808742	T	G	logTG	-0.0136	0.0024	7.655e-09	-0.0135	0.0027	6.826e-07	0.8239	not_sig	-0.00612017	0.00423778	0.00100187	0.00388807	0.211002	not_sig	0.0120483	0.00438268	0.00427516	0.0039023	0.183364	not_sig	0.00025076	0.001368	-0.0015959	0.0017609	0.449383	not_sig	0.00042376	0.0027513	-0.0047043	0.0024041	0.124654	not_sig
19	4147445	A	C	logTG	0.015	0.0019	1.884e-15	0.0178	0.0022	1.272e-16	0.1579	not_sig	-0.00726698	0.00338257	-0.00575126	0.00309918	0.738598	not_sig	-0.000116753	0.00349945	-0.0101608	0.00311062	0.0311879	not_sig	-0.0011317	0.0010926	-0.00032547	0.0014036	0.532242	not_sig	-0.0012484	0.0021975	-0.0012222	0.0019162	0.98903	not_sig
19	4966041	T	C	logTG	0.0151	0.0018	1.951e-17	0.0145	0.0021	1.731e-12	0.8472	not_sig	0.00836575	0.00308798	0.00851932	0.00283073	0.970463	not_sig	-0.000752439	0.00319478	0.000426885	0.00284112	0.781734	not_sig	0.00024259	0.00099711	0.0012037	0.0012816	0.648218	not_sig	0.0020689	0.0020053	0.0035746	0.0017497	0.506395	not_sig
19	7222655	T	C	logTG	-0.0191	0.0016	3.471e-31	-0.0197	0.0019	3.677e-26	0.5908	not_sig	0.00229049	0.0029629	0.00301654	0.00272214	0.855375	not_sig	0.00250412	0.00306494	-0.0165151	0.00273237	3.28026e-06	sig	0.0010354	0.00095675	0.0024439	0.0012327	0.591802	not_sig	0.0041694	0.0019242	0.0035818	0.001683	0.870877	not_sig
19	7909765	A	G	logTG	-0.0119	0.002	9.707e-10	-0.0153	0.0021	8.536e-13	0.7934	not_sig	-0.00544194	0.00330614	-0.00497901	0.00302868	0.916943	not_sig	0.00727792	0.00342011	-0.00511222	0.00303968	0.00653256	not_sig	-0.00097596	0.0010652	-0.00033182	0.0013688	0.59822	not_sig	-0.0014177	0.0021424	-0.00061031	0.0018687	0.776021	not_sig
19	8429323	A	G	logTG	0.2488	0.0062	1.78e-349	0.2359	0.0071	1.66e-242	0.06101	not_sig	-0.00947941	0.010523	-0.00972896	0.00979155	0.986009	not_sig	0.0141555	0.0108888	0.0561374	0.00982885	0.00404477	not_sig	-0.00066771	0.0034021	0.00124	0.0044353	0.734382	not_sig	-0.0028769	0.006842	-0.0038745	0.0060552	0.890803	not_sig
19	8945880	A	G	logTG	-0.0817	0.0142	9.065e-09	-0.1061	0.0153	3.477e-12	0.2163	not_sig	0.00934845	0.0244236	0.00636146	0.0225765	0.927722	not_sig	0.00166027	0.0252715	-0.0561534	0.0226612	0.0871283	not_sig	-0.0044374	0.0073952	-0.0094077	0.0095349	0.825171	not_sig	-0.0029289	0.014873	-0.0096941	0.013017	0.700832	not_sig
19	10332988	T	C	logTG	0.0062	0.0017	0.0002497	0.0119	0.0019	9.001e-10	0.2168	not_sig	NA	NA	NA	NA	NA	NA	NA	NA	NA	NA	NA	NA	-0.00021176	0.00097982	-0.0010731	0.0012611	0.676579	not_sig	-0.00099927	0.0019706	-0.0030138	0.0017217	0.386035	not_sig
19	11350874	T	C	logTG	0.3717	0.0399	1.246e-20	0.4204	0.0513	2.397e-16	0.3184	not_sig	0.0348978	0.0666671	0.0784256	0.0614618	0.627771	not_sig	0.0477172	0.0688107	-0.0895792	0.0616926	0.135651	not_sig	NA	NA	NA	NA	NA	NA	NA	NA	NA	NA	NA	NA
19	18735666	T	C	logTG	-0.0139	0.0017	1.197e-16	-0.0105	0.0019	2.562e-08	0.2391	not_sig	-0.0102896	0.00299097	-0.00916892	0.00274134	0.780247	not_sig	-0.0101418	0.00309426	-0.00312381	0.00275136	0.0886787	not_sig	0.0010671	0.00095842	2.4363e-05	0.0012316	0.4079	not_sig	-0.0018587	0.0019275	0.00053989	0.0016815	0.322107	not_sig
19	19379549	T	C	logTG	0.1194	0.0031	2.45e-318	0.0964	0.0035	9.18e-164	3.508e-10	sig	0.00933707	0.0055732	0.00150226	0.00511445	0.295479	not_sig	-0.0134444	0.00576537	-0.0281186	0.00513412	0.0562376	not_sig	0.00040742	0.0018009	-0.00022644	0.0023155	0.812264	not_sig	0.0006076	0.0036218	-0.00025435	0.0031612	0.849302	not_sig
19	33894846	T	C	logTG	0.0161	0.0017	8.012e-21	0.0131	0.002	2.542e-11	0.4556	not_sig	-0.00153042	0.00311707	-0.00929706	0.00285719	0.0635638	not_sig	-0.0171176	0.00322448	-0.00588213	0.00286784	0.00891932	not_sig	-0.0003173	0.0010055	0.00087048	0.0012928	0.485659	not_sig	-0.0026994	0.0020222	-0.0042603	0.001765	0.487452	not_sig
19	35551428	A	C	logTG	-0.0248	0.0023	6.484e-27	-0.0237	0.0026	7.757e-20	0.5718	not_sig	-0.00215802	0.00386542	-0.00495945	0.00354676	0.589627	not_sig	0.00625124	0.00399893	-0.00585853	0.00355951	0.0230895	not_sig	-0.00053751	0.0012477	-0.0007221	0.0016054	0.985191	not_sig	0.00031361	0.0025093	-0.00060434	0.0021917	0.766086	not_sig
19	41754430	A	G	logTG	0.0976	0.0122	1.133e-15	0.0708	0.013	5.071e-08	0.1648	not_sig	-0.00296714	0.0195827	-0.0166412	0.0174016	0.598059	not_sig	-0.017434	0.0202582	0.0141959	0.0174699	0.234991	not_sig	NA	NA	NA	NA	NA	NA	NA	NA	NA	NA	NA	NA
19	44356388	A	T	logTG	0.3408	0.0631	6.701e-08	0.1956	0.0627	0.001812	0.09193	not_sig	0.0711043	0.0570055	-0.000591318	0.0554515	0.362495	not_sig	0.00417916	0.0589845	0.0165311	0.0556597	0.878413	not_sig	NA	NA	NA	NA	NA	NA	NA	NA	NA	NA	NA	NA
19	44890969	C	G	logTG	-0.236	0.0239	4.791e-23	-0.1738	0.0258	1.719e-11	0.3321	not_sig	0.00181646	0.0419658	-0.0593676	0.0389331	0.280331	not_sig	0.00774713	0.0434227	0.0256681	0.0390133	0.75781	not_sig	0.010372	0.013006	0.016163	0.016876	0.955145	not_sig	0.0050131	0.026156	-0.024753	0.023039	0.35232	not_sig
19	45416178	T	G	logTG	-0.1001	0.0019	3.21e-582	-0.0773	0.0022	3.84e-260	7.274e-23	sig	0.00883183	0.00346432	0.00964058	0.00318495	0.86219	not_sig	0.0152738	0.00358402	0.0268595	0.00319687	0.015392	not_sig	0.0015553	0.0011168	0.0016468	0.0014396	0.787313	not_sig	0.0029597	0.0022461	0.0017451	0.0019654	0.694786	not_sig
19	46887199	A	G	logTG	-0.0121	0.0018	3.036e-11	-0.0137	0.0021	6.204e-11	0.8914	not_sig	0.00209482	0.00316674	0.00497011	0.00290853	0.4994	not_sig	0.00258405	0.00327576	-0.00882791	0.00291917	0.00899183	not_sig	0.00074751	0.0010224	-0.0015967	0.0013169	0.167923	not_sig	0.0010672	0.0020561	0.00025924	0.0017978	0.76156	not_sig
19	47573527	A	G	logTG	0.0106	0.0018	2.514e-09	0.0132	0.0021	1.381e-10	0.9198	not_sig	0.0279771	0.0032471	0.0198414	0.00298284	0.0623614	not_sig	-0.00393452	0.0033588	-0.000913203	0.00299408	0.500035	not_sig	-0.0021324	0.0010485	-0.0019675	0.0013504	0.588618	not_sig	0.0056576	0.0021086	0.0042105	0.0018436	0.648273	not_sig
19	48383542	A	C	logTG	0.0174	0.0023	8.56e-14	0.0167	0.0027	4.262e-10	0.5533	not_sig	0.00508951	0.00395574	0.00349376	0.00362502	0.763873	not_sig	0.00748854	0.00409168	0.00133435	0.00363796	0.258899	not_sig	0.00030237	0.0012772	0.00016005	0.0016409	0.9105	not_sig	0.003287	0.0025687	-0.0014559	0.0022402	0.140044	not_sig
19	49259529	A	G	logTG	-0.0214	0.0018	2.494e-33	-0.019	0.002	9.101e-21	0.1197	not_sig	NA	NA	NA	NA	NA	NA	NA	NA	NA	NA	NA	NA	-0.0014595	0.00098041	-0.00077545	0.0012586	0.4805	not_sig	-0.00043128	0.0019718	0.0019772	0.0017182	0.316029	not_sig
19	50044741	C	G	logTG	0.0165	0.0023	6.323e-13	0.0234	0.0026	3.851e-19	0.04445	not_sig	-0.00742608	0.00406238	-0.000440467	0.00372654	0.200573	not_sig	0.00298038	0.0042025	0.00699162	0.0037404	0.473909	not_sig	-0.0010734	0.0013047	-0.0037747	0.0016803	0.361979	not_sig	0.0036644	0.002624	0.0019742	0.002294	0.634962	not_sig
19	54796719	C	G	logTG	-0.0142	0.0019	2.695e-13	-0.0091	0.0022	4.12e-05	0.4453	not_sig	0.00360467	0.00345477	0.00561306	0.00316252	0.664932	not_sig	0.00509325	0.00357395	0.00226703	0.00317393	0.552587	not_sig	-0.0010373	0.001115	-0.00088874	0.0014312	0.779255	not_sig	0.0027983	0.0022425	-0.00079178	0.0019539	0.202587	not_sig
19	56099951	A	G	logTG	-0.0188	0.0023	1.014e-16	-0.0251	0.0026	1.711e-22	0.6199	not_sig	-0.0113364	0.00391457	-0.00637004	0.003603	0.345752	not_sig	0.00619554	0.00405031	-0.00634526	0.00361597	0.0203451	not_sig	0.0005804	0.0012606	0.00086364	0.0016264	0.987697	not_sig	-0.002753	0.0025353	-0.003736	0.0022204	0.714748	not_sig
19	57488423	T	C	logTG	-0.0057	0.0016	0.0004875	-0.0142	0.0019	2.205e-14	0.002006	not_sig	0.00155526	0.00297174	0.000488075	0.00273516	0.789557	not_sig	0.0022321	0.00307416	-0.0114095	0.00274529	0.000885934	not_sig	0.0002922	0.00096114	0.0020247	0.0012405	0.375864	not_sig	0.0048756	0.001933	-0.00024166	0.0016936	0.0372748	not_sig
2	256116	T	G	logTG	0.0095	0.0017	1.794e-08	0.0119	0.0019	4.994e-10	0.6075	not_sig	0.0100069	0.0030196	0.0116417	0.00277503	0.687216	not_sig	-0.0138804	0.00314104	-0.00205672	0.0027905	0.00470534	not_sig	-0.0012366	0.00098453	0.0022231	0.0012694	0.0321252	not_sig	0.0032343	0.0019946	0.0035657	0.0017435	0.837745	not_sig
2	3640142	T	C	logTG	-0.0154	0.0021	8.939e-14	-0.0166	0.0024	2.337e-12	0.8484	not_sig	0.00355227	0.00384808	-0.00544586	0.0035244	0.0815572	not_sig	0.00650788	0.0040032	-0.0126975	0.00354408	0.00030866	not_sig	-0.00042272	0.0012474	-0.0022126	0.0016044	0.493843	not_sig	0.00027716	0.0025272	0.002709	0.0022037	0.42292	not_sig
2	20371772	A	G	logTG	0.0169	0.0016	1.049e-25	0.0195	0.0018	1.983e-26	0.415	not_sig	0.000552881	0.00292495	0.00018865	0.00268245	0.926144	not_sig	0.00268382	0.00304274	0.0091741	0.00269737	0.108892	not_sig	0.00013727	0.000953	0.00063249	0.0012259	0.808026	not_sig	-0.0047364	0.0019307	-0.00017715	0.0016838	0.0638433	not_sig
2	21231524	A	G	logTG	0.0608	0.0019	3.69e-218	0.0731	0.0022	1.15e-241	0.005484	not_sig	-0.00441274	0.00360245	-0.010213	0.00330196	0.230582	not_sig	-0.00927017	0.00374732	0.00372645	0.00332056	0.00912802	not_sig	-0.00079069	0.0011775	0.0023123	0.0015135	0.121552	not_sig	-0.0031028	0.0023855	-0.0026005	0.0020788	0.904238	not_sig
2	21778585	A	G	logTG	-0.0627	0.0104	1.507e-09	-0.0349	0.0108	0.001251	0.3872	not_sig	-0.0267908	0.0150121	-0.0132263	0.0138066	0.501741	not_sig	-0.00517497	0.015621	0.0191624	0.0138815	0.242106	not_sig	NA	NA	NA	NA	NA	NA	NA	NA	NA	NA	NA	NA
2	25592918	T	C	logTG	-0.0072	0.0018	5.494e-05	-0.0093	0.002	3.948e-06	0.3323	not_sig	NA	NA	NA	NA	NA	NA	NA	NA	NA	NA	NA	NA	-0.00011071	0.0010219	0.00077768	0.0013139	0.627519	not_sig	0.00077477	0.0020703	0.0055336	0.0018047	0.0549573	not_sig
2	26924018	C	G	logTG	-0.036	0.0046	9.963e-15	-0.0412	0.0051	1.181e-15	0.1533	not_sig	-0.00337221	0.00734793	-0.00737137	0.00670081	0.684604	not_sig	-0.00513612	0.00764136	-0.0174164	0.00673603	0.225948	not_sig	0.0019178	0.0023961	-0.0011623	0.003066	0.387889	not_sig	-0.0066807	0.0048543	-0.00073526	0.0042112	0.337473	not_sig
2	27730940	T	C	logTG	-0.1094	0.0017	1.55e-929	-0.1143	0.0019	4.74e-789	0.8369	not_sig	0.0202071	0.00297399	0.00251718	0.00272775	9.52682e-06	sig	-0.00847591	0.00309343	-0.00361155	0.00274269	0.237283	not_sig	0.0026624	0.00097391	0.0022376	0.0012526	0.397238	not_sig	-0.0010126	0.0019731	-0.0019295	0.0017205	0.684642	not_sig
2	43490619	A	T	logTG	0.0136	0.0023	2.043e-09	0.0139	0.0025	2.578e-08	0.9324	not_sig	0.00133403	0.00401893	0.00664431	0.00367723	0.324805	not_sig	-0.00179603	0.00418048	0.00643071	0.00369766	0.138732	not_sig	0.00067041	0.0013011	-0.00023291	0.0016693	0.628035	not_sig	0.0014403	0.002636	-0.0012407	0.0022928	0.41199	not_sig
2	44074431	T	C	logTG	0.0097	0.0018	7.804e-08	0.0117	0.0021	1.905e-08	0.4364	not_sig	0.00132969	0.00310317	-0.00148089	0.00284675	0.500232	not_sig	-0.000810488	0.00322806	0.00720492	0.0028624	0.0620355	not_sig	-0.0015571	0.001014	0.00058024	0.0013047	0.143583	not_sig	-0.0012455	0.0020543	-0.0035343	0.0017921	0.343333	not_sig
7	130429186	A	T	logTG	0.0137	0.0017	1.273e-16	0.0383	0.0019	4.62e-93	4.208e-19	sig	-0.00706235	0.00295172	-0.00973676	0.00270151	0.499616	not_sig	-0.00777555	0.00306093	0.0348147	0.0027121	1.31513e-25	sig	0.00072557	0.00095334	-0.00065079	0.0012228	0.348421	not_sig	-0.0011534	0.001925	0.00073699	0.0016746	0.430057	not_sig
2	58950363	T	G	logTG	-0.0099	0.0018	3.938e-08	-0.0108	0.002	1.219e-07	0.9738	not_sig	-0.0181076	0.00324556	-0.022451	0.0029779	0.319254	not_sig	-0.00116152	0.00337569	-0.00187491	0.00299458	0.873835	not_sig	0.0024299	0.001053	-0.00094592	0.0013552	0.0265564	not_sig	0.0010888	0.0021334	-0.0012966	0.0018613	0.365772	not_sig
2	61735446	T	C	logTG	0.0091	0.0016	2.311e-08	0.0116	0.0018	3.975e-10	0.2547	not_sig	0.00347899	0.00293732	-0.00139117	0.00269152	0.216934	not_sig	-0.00402295	0.00305551	0.00590139	0.00270653	0.0146035	not_sig	2.9772e-05	0.00095742	0.001214	0.0012306	0.516499	not_sig	0.0016238	0.0019396	0.0075139	0.0016902	0.0107673	not_sig
2	65296280	T	C	logTG	-0.0208	0.0016	1.293e-36	-0.0182	0.0019	7.496e-22	0.257	not_sig	-0.00221975	0.00301667	-0.00375647	0.00277574	0.704959	not_sig	0.00714675	0.00313787	-0.0130752	0.00279093	1.32067e-06	sig	0.0009735	0.0009841	0.00033308	0.0012704	0.570948	not_sig	0.00054764	0.0019937	0.00098868	0.0017449	0.845959	not_sig
2	66665146	T	C	logTG	-0.0107	0.0017	2.055e-10	-0.0092	0.0019	2.211e-06	0.884	not_sig	0.00112184	0.00310498	-0.00397884	0.00285442	0.221888	not_sig	-0.00947322	0.00322986	-0.00937053	0.0028701	0.980955	not_sig	0.0023752	0.0010161	0.0018803	0.0013103	0.433375	not_sig	0.0013442	0.0020585	0.00090989	0.0017997	0.882833	not_sig
2	72329685	T	C	logTG	-0.0088	0.0017	2.904e-07	-0.0068	0.0019	0.0004606	0.5988	not_sig	0.00580356	0.00308958	0.00274015	0.00282823	0.460078	not_sig	-0.00884631	0.00321357	-0.00484338	0.00284425	0.348822	not_sig	-0.00070327	0.0010053	0.0010032	0.0012909	0.290096	not_sig	0.0015044	0.0020367	-0.0010608	0.001773	0.311072	not_sig
2	111927379	A	G	logTG	-0.0108	0.0016	4.282e-11	-0.0156	0.0019	3.868e-17	0.06576	not_sig	0.00225173	0.0029203	0.00843516	0.002675	0.114782	not_sig	-0.00173183	0.00303767	-0.00721599	0.00268976	0.174585	not_sig	0.0018859	0.00095218	0.00036666	0.0012235	0.196341	not_sig	-0.0011439	0.001929	-0.003354	0.0016805	0.330164	not_sig
2	112763640	C	G	logTG	-0.0107	0.0017	1.16e-10	-0.0063	0.0019	0.001004	0.1442	not_sig	-0.00585199	0.00300705	0.00274897	0.00276008	0.0333059	not_sig	-0.00642949	0.00312794	0.00326455	0.00277523	0.0198865	not_sig	0.00054403	0.00098019	-0.0035677	0.0012622	0.0189268	not_sig	-0.0040545	0.0019857	-0.0013227	0.0017337	0.29203	not_sig
2	113867288	T	C	logTG	-0.0087	0.0017	1.679e-07	-0.01	0.0019	1.691e-07	0.02938	not_sig	0.00088664	0.00294657	-0.000902308	0.00269939	0.651146	not_sig	0.00307524	0.00306485	-0.0102593	0.00271418	0.00106965	not_sig	0.00041533	0.00095954	0.0016009	0.0012327	0.577044	not_sig	0.0015341	0.0019439	0.00079817	0.0016931	0.778849	not_sig
2	119749146	C	G	logTG	0.0432	0.0073	2.756e-09	0.0488	0.0083	4.479e-09	0.8562	not_sig	0.011912	0.0120348	0.00339333	0.0111242	0.599567	not_sig	0.0175148	0.0125176	0.00742574	0.0111898	0.546141	not_sig	0.0014529	0.003924	0.00055913	0.0050873	0.83887	not_sig	-0.00097933	0.0079497	-0.0031711	0.0069876	0.81609	not_sig
2	121309231	C	G	logTG	0.0171	0.0019	1.236e-19	0.0144	0.0021	1.608e-11	0.3328	not_sig	0.000784821	0.00334213	-0.00498303	0.00306393	0.198824	not_sig	-0.00593349	0.00347656	0.0207459	0.00308062	7.97753e-09	sig	0.0024034	0.0010945	0.0017113	0.0014074	0.406799	not_sig	3.3837e-05	0.0022174	-0.0017161	0.0019331	0.513808	not_sig
2	146347459	A	G	logTG	-0.0114	0.0017	9.151e-12	-0.01	0.0019	1.206e-07	0.9527	not_sig	-0.00631917	0.00298652	0.002326	0.00273815	0.0311517	not_sig	0.00086731	0.00310664	-0.0064812	0.00275323	0.0753917	not_sig	-0.00049866	0.00096988	0.0015895	0.0012475	0.208821	not_sig	0.008704	0.0019648	0.005035	0.0017134	0.173187	not_sig
2	158508271	T	C	logTG	0.014	0.0024	2.807e-09	0.0109	0.0028	7.244e-05	0.5971	not_sig	-0.00867026	0.00421263	-0.00159261	0.00387511	0.211685	not_sig	0.0172179	0.00438163	0.0231406	0.00389654	0.310326	not_sig	0.0013736	0.0013732	0.00058548	0.0017717	0.59707	not_sig	-0.0014186	0.0027821	-0.0073287	0.0024335	0.0754432	not_sig
2	161118687	T	C	logTG	0.008	0.0018	1.203e-05	0.014	0.002	8.234e-12	0.04298	not_sig	0.0109831	0.00323634	0.0128589	0.00297432	0.666436	not_sig	0.010278	0.00336621	0.00886059	0.00299107	0.751887	not_sig	0.0001843	0.0010516	-0.0011654	0.0013554	0.472129	not_sig	0.0038224	0.0021304	0.0013979	0.0018617	0.38599	not_sig
2	165528876	T	C	logTG	0.0281	0.0017	7.933e-63	0.0398	0.0019	3.51e-95	0.0002173	not_sig	-0.00269434	0.00297832	-0.0151914	0.00273173	0.00178798	not_sig	-0.00819592	0.00309782	0.0661968	0.00274698	8.31764e-73	sig	-0.0013118	0.00097174	-0.00059266	0.0012505	0.486461	not_sig	0.00079281	0.0019686	0.00021037	0.0017176	0.819502	not_sig
2	169700838	A	C	logTG	0.0111	0.0017	1.006e-10	0.0076	0.0019	7.766e-05	0.05445	not_sig	-0.000604361	0.00305738	0.00241213	0.00279239	0.461836	not_sig	0.00278703	0.00318044	-0.000313326	0.00280787	0.46295	not_sig	-0.00093991	0.00099556	-0.0032821	0.0012757	0.300152	not_sig	-0.0037499	0.0020169	0.0019087	0.0017522	0.0244728	not_sig
2	171635168	A	G	logTG	0.0074	0.0017	1.218e-05	0.0112	0.0019	5.227e-09	0.2544	not_sig	0.00505153	0.00304061	0.014108	0.0027865	0.0265583	not_sig	0.00860072	0.00316321	0.00701275	0.00280208	0.70585	not_sig	-0.0010393	0.00098739	0.00084368	0.0012692	0.212028	not_sig	0.0027576	0.0020003	0.0029959	0.0017433	0.876027	not_sig
2	180707310	T	C	logTG	-0.0092	0.0018	2.643e-07	-0.0095	0.002	2.874e-06	0.8638	not_sig	-0.00795395	0.00315653	-0.00649525	0.00289275	0.730757	not_sig	0.00153912	0.00328344	-0.00223938	0.0029088	0.386941	not_sig	0.00022066	0.0010275	0.00042859	0.0013215	0.953022	not_sig	0.001272	0.0020817	-0.0013282	0.0018152	0.313024	not_sig
2	202185132	A	G	logTG	0.01	0.0016	9.493e-10	0.0092	0.0019	6.449e-07	0.3372	not_sig	-0.000928021	0.0029191	-0.00220492	0.00267576	0.744653	not_sig	-0.00286679	0.00303644	-0.00143291	0.00269056	0.722594	not_sig	-0.0011513	0.00095047	-0.0027225	0.0012225	0.546202	not_sig	0.0012632	0.0019256	-0.00077322	0.0016792	0.396211	not_sig
2	203431804	A	G	logTG	0.0187	0.0025	9.847e-14	0.0192	0.0029	2.209e-11	0.6036	not_sig	0.0181808	0.0044562	0.00557993	0.00407923	0.0351405	not_sig	-0.00211839	0.00463497	0.00257833	0.00410184	0.445949	not_sig	-0.00075282	0.0014577	-0.0012928	0.0018726	0.936143	not_sig	-0.0049298	0.0029531	-0.00054493	0.002572	0.24575	not_sig
2	219142773	T	C	logTG	0.0096	0.0016	5.753e-09	0.0091	0.0019	1.175e-06	0.4055	not_sig	-0.00176757	0.0029643	0.00814645	0.00271694	0.0127631	not_sig	0.0106596	0.00308345	0.00820853	0.00273229	0.550128	not_sig	0.00038779	0.0009674	-0.00010512	0.0012438	0.718591	not_sig	0.0028469	0.0019598	0.00089818	0.0017084	0.445419	not_sig
2	219699999	A	G	logTG	-0.0738	0.0046	9.045e-58	-0.0763	0.005	3.401e-53	0.6903	not_sig	NA	NA	NA	NA	NA	NA	NA	NA	NA	NA	NA	NA	NA	NA	NA	NA	NA	NA	NA	NA	NA	NA	NA	NA
7	130432538	A	T	nonHDL	-0.0063	0.0021	0.002812	-0.0234	0.002	3.243e-32	2.026e-08	sig	0.00779421	0.0029277	0.00981901	0.00268021	0.606379	not_sig	0.00854146	0.003036	-0.0351185	0.00269075	3.09626e-27	sig	-0.00077379	0.00095019	0.00064324	0.0012187	0.329592	not_sig	0.0012645	0.0019186	-0.00083311	0.0016691	0.379493	not_sig
2	227605895	T	C	logTG	0.0143	0.0034	2.948e-05	0.0233	0.0039	2.52e-09	0.3981	not_sig	-0.0101641	0.00701427	-0.0154514	0.00645648	0.575354	not_sig	0.00333422	0.00729364	0.0179248	0.00649114	0.133369	not_sig	-0.0030194	0.0022867	-0.00027583	0.0029493	0.351352	not_sig	0.0020709	0.0046325	0.00040055	0.0040509	0.779763	not_sig
2	234512095	T	C	logTG	-0.0172	0.0037	3.967e-06	-0.0163	0.004	4.925e-05	0.9523	not_sig	0.00635791	0.0057112	-0.00180666	0.00522079	0.286537	not_sig	0.00301558	0.00594143	-0.00451667	0.00525009	0.339987	not_sig	9.6563e-05	0.0018633	0.00033564	0.0023885	0.955005	not_sig	0.0048061	0.0037749	0.0027647	0.0032807	0.69251	not_sig
20	569164	T	C	logTG	-0.0458	0.0072	1.981e-10	-0.047	0.0078	1.345e-09	0.9796	not_sig	0.00623336	0.0121912	0.0174244	0.0111524	0.493901	not_sig	-0.00685046	0.0126136	-0.0935278	0.0111865	2.41907e-07	sig	0.0012942	0.0038712	0.0053998	0.0049555	0.625642	not_sig	0.010589	0.0077841	-0.0041568	0.0067669	0.12999	not_sig
20	25534854	T	C	logTG	0.0193	0.0056	0.0006289	0.0341	0.006	1.287e-08	0.008409	not_sig	0.033	0.00828751	0.0441806	0.00763285	0.31619	not_sig	0.0182051	0.0085764	0.00908586	0.00766059	0.425735	not_sig	0.0056964	0.0026805	0.00087333	0.0034594	0.152764	not_sig	0.018531	0.0053897	0.017201	0.0047238	0.951174	not_sig
20	30202961	T	C	logTG	-0.0132	0.0022	1.096e-09	-0.0125	0.0026	9.545e-07	0.6069	not_sig	-0.00924526	0.00402476	-0.00663891	0.00369233	0.629815	not_sig	0.00660462	0.00416545	-0.0040956	0.00370608	0.0539015	not_sig	0.0011353	0.0012986	-0.0031662	0.0016674	0.050716	not_sig	0.006567	0.0026112	0.0057054	0.0022769	0.866067	not_sig
20	32308275	T	C	logTG	-0.0173	0.0025	2.565e-12	-0.0125	0.0028	6.385e-06	0.004947	not_sig	0.00310056	0.00404689	0.00254806	0.00371726	0.919109	not_sig	-0.00454447	0.0041881	-0.00499362	0.00373174	0.9359	not_sig	-0.00077079	0.0013121	-0.0015657	0.0016871	0.850188	not_sig	0.0019218	0.0026383	0.0047464	0.0023038	0.359546	not_sig
20	34131396	T	C	logTG	0.0175	0.0022	6.408e-15	0.0174	0.0026	2.604e-11	0.9323	not_sig	-0.0077824	0.00423582	-0.00295766	0.00390056	0.397374	not_sig	0.00880007	0.00438417	0.0011003	0.00391484	0.188244	not_sig	-0.0010134	0.00137	-0.00057384	0.0017661	0.736705	not_sig	-0.0035268	0.0027548	9.3678e-05	0.0024117	0.301523	not_sig
20	38620281	T	C	logTG	0.0099	0.0019	1.855e-07	0.0074	0.0021	0.0005532	0.5081	not_sig	0.00255273	0.00345023	-0.00140418	0.0031751	0.394002	not_sig	-0.00307491	0.00357075	-0.00598668	0.00318732	0.541177	not_sig	-0.0017818	0.0011153	-0.00050312	0.0014358	0.333606	not_sig	0.0021999	0.0022425	0.0012753	0.0019606	0.763976	not_sig
20	39179822	C	G	logTG	-0.0628	0.0055	1.224e-30	-0.0596	0.0057	1.688e-25	0.5996	not_sig	0.0195331	0.00880774	0.0330802	0.00794972	0.24881	not_sig	-0.0181885	0.00911854	-0.0727096	0.0079802	6.20659e-06	sig	0.0018773	0.0027967	0.0019399	0.0035388	0.888461	not_sig	0.0010077	0.0056235	0.0019734	0.0048323	0.880265	not_sig
20	39856080	A	C	logTG	0.0121	0.0017	4.004e-12	0.018	0.002	2.103e-19	0.04607	not_sig	-0.0030431	0.00318446	-0.000226719	0.00291681	0.510065	not_sig	0.010068	0.00329578	0.0203156	0.0029278	0.0195533	not_sig	-0.00079432	0.0010294	-0.0022798	0.0013199	0.553889	not_sig	0.0051782	0.0020699	-0.0020121	0.0018024	0.00553422	not_sig
20	42315091	A	G	logTG	-0.0142	0.0025	2.021e-08	-0.0135	0.0029	2.412e-06	0.4468	not_sig	0.00581895	0.00454222	0.00405459	0.00417345	0.772653	not_sig	0.000909828	0.00469994	-0.00923011	0.00418894	0.105726	not_sig	0.0013528	0.0014681	-0.00070709	0.0018871	0.341435	not_sig	-0.0012785	0.002952	0.003863	0.0025769	0.154587	not_sig
20	43034079	A	G	logTG	0.0104	0.0024	1.411e-05	0.0125	0.0027	2.828e-06	0.8559	not_sig	-0.00599135	0.00425669	-0.00118648	0.003893	0.400163	not_sig	-0.00354198	0.00440536	0.00386142	0.00390707	0.206643	not_sig	-0.00093098	0.0013728	-0.00018177	0.0017579	0.657924	not_sig	-0.0031105	0.0027603	0.0016795	0.0024004	0.163987	not_sig
20	44551855	T	C	logTG	0.0459	0.002	4.18e-117	0.0518	0.0023	3.83e-113	0.6555	not_sig	-0.00915824	0.00367139	-0.00810467	0.00337492	0.831022	not_sig	0.00285143	0.00379977	0.00393806	0.00338801	0.830243	not_sig	-0.00081858	0.0011873	-0.00084885	0.0015276	0.887344	not_sig	-0.0019508	0.0023873	0.0036076	0.0020859	0.0584553	not_sig
20	45594711	A	G	logTG	0.0166	0.0019	7.648e-19	0.0204	0.0021	1.449e-21	0.1992	not_sig	0.00331282	0.00327123	-0.00645438	0.00299333	0.0260879	not_sig	-0.00116942	0.0033851	0.0250509	0.00300458	5.93475e-09	sig	0.00075977	0.0010556	0.00010182	0.0013529	0.621908	not_sig	0.00075373	0.0021226	0.0033641	0.0018473	0.301134	not_sig
20	51033910	T	G	logTG	-0.0089	0.0017	1.071e-07	-0.0124	0.0019	8.797e-11	0.02516	not_sig	-0.00561907	0.00304566	-0.0126063	0.00279199	0.0876159	not_sig	-0.014642	0.00315205	-0.0175602	0.00280256	0.487098	not_sig	-0.00086895	0.00098478	0.00071406	0.0012633	0.29288	not_sig	-0.0025378	0.0019801	-6.9807e-05	0.001725	0.327478	not_sig
20	56118666	T	C	logTG	0.0127	0.0016	3.389e-15	0.0143	0.0019	1.068e-14	0.626	not_sig	0.00703359	0.00298861	0.000756215	0.00274656	0.118268	not_sig	0.00814148	0.00309316	0.00969928	0.00275712	0.705717	not_sig	-0.0026667	0.00096637	-0.00050212	0.0012431	0.0705705	not_sig	0.0025212	0.0019432	-0.0030683	0.0016975	0.0200184	not_sig
20	62711459	T	C	logTG	0.0153	0.0017	2.928e-19	0.0168	0.002	1.009e-16	0.4366	not_sig	-0.00769775	0.00294911	-0.00934385	0.00270792	0.677943	not_sig	0.00341374	0.00305191	0.0283382	0.00271835	9.04591e-10	sig	-0.00017471	0.00095114	0.00035549	0.0012228	0.736223	not_sig	-0.0017395	0.0019125	0.0013111	0.0016698	0.199752	not_sig
21	40716136	A	C	logTG	-0.0128	0.0016	4.064e-15	-0.01	0.0018	5.41e-08	0.3471	not_sig	-0.00889971	0.00296076	-0.00877777	0.00271604	0.975545	not_sig	0.000555303	0.00306065	-0.00207607	0.00272636	0.519049	not_sig	-0.0022546	0.00095303	-0.00040338	0.0012247	0.118133	not_sig	-0.00072345	0.0019144	0.0068556	0.0016713	0.00111104	not_sig
21	42622479	A	G	logTG	0.0106	0.0022	9.316e-07	0.0121	0.0024	3.91e-07	0.8611	not_sig	0.00952062	0.00358769	0.00972192	0.00329786	0.966719	not_sig	0.00181307	0.00370898	0.00437712	0.00331052	0.604441	not_sig	-0.002536	0.0011525	-0.00083155	0.0014834	0.200985	not_sig	0.0022959	0.002315	0.0027294	0.0020244	0.844576	not_sig
21	46875775	A	G	logTG	0.2576	0.0205	4.071e-36	0.2786	0.0305	6.252e-20	0.8325	not_sig	NA	NA	NA	NA	NA	NA	NA	NA	NA	NA	NA	NA	NA	NA	NA	NA	NA	NA	NA	NA	NA	NA	NA	NA
21	47401057	T	C	logTG	-0.1718	0.0284	1.495e-09	-0.1599	0.0393	4.692e-05	0.7042	not_sig	NA	NA	NA	NA	NA	NA	NA	NA	NA	NA	NA	NA	NA	NA	NA	NA	NA	NA	NA	NA	NA	NA	NA	NA
22	17625915	A	G	logTG	-0.0224	0.0038	4.181e-09	-0.0236	0.0044	6.303e-08	0.3245	not_sig	0.00992686	0.00639559	0.00287067	0.00583569	0.410399	not_sig	-0.01205	0.00661512	-0.0149707	0.00585998	0.739925	not_sig	0.0017248	0.0020674	-0.0051554	0.0026437	0.0503859	not_sig	-0.0046332	0.0041578	0.00069402	0.0036053	0.30907	not_sig
22	21939675	T	G	logTG	0.0104	0.0019	3.855e-08	0.0084	0.0022	0.0001265	0.1841	not_sig	-0.000373178	0.00373045	0.000240777	0.00342215	0.902505	not_sig	-0.00587712	0.00385834	-0.00408606	0.00343566	0.727681	not_sig	4.752e-05	0.0012048	0.0020497	0.0015489	0.383167	not_sig	0.00083752	0.002423	0.00019936	0.0021122	0.838554	not_sig
22	24265659	T	C	logTG	0.0097	0.0017	7.134e-09	0.012	0.0019	2.165e-10	0.3475	not_sig	-0.000207421	0.0029561	-0.00544529	0.00271772	0.187666	not_sig	-0.00054062	0.0030572	0.00604608	0.0027281	0.106394	not_sig	0.0006057	0.00095178	0.00010918	0.0012259	0.674866	not_sig	-0.00029546	0.0019141	0.0024115	0.0016718	0.244517	not_sig
22	29130012	T	C	logTG	0.0106	0.0018	1.448e-09	0.0132	0.002	4.066e-11	0.3825	not_sig	0.00581401	0.00319836	0.00182793	0.00294431	0.354372	not_sig	0.0102632	0.00330755	0.000602729	0.00295552	0.0287035	not_sig	0.00034306	0.0010337	0.001313	0.0013333	0.672975	not_sig	0.0061771	0.0020788	0.002958	0.0018182	0.247221	not_sig
22	29963508	T	C	logTG	0.0123	0.0016	7.596e-14	0.0113	0.0019	9.672e-10	0.8708	not_sig	-0.00382779	0.00293674	-0.00312966	0.00269479	0.859574	not_sig	0.00877954	0.00303734	0.00268945	0.00270482	0.13258	not_sig	-0.0017324	0.00094703	-0.0015161	0.0012178	0.59411	not_sig	0.0018712	0.0019046	-0.0019711	0.0016607	0.103168	not_sig
22	36042986	T	C	logTG	-0.0138	0.0018	4.62e-15	-0.0119	0.002	1.105e-09	0.7892	not_sig	NA	NA	NA	NA	NA	NA	NA	NA	NA	NA	NA	NA	-0.0011864	0.00097777	0.0016972	0.0012533	0.065914	not_sig	-0.0020611	0.0019664	-0.00036266	0.0017091	0.50119	not_sig
22	38599978	A	G	logTG	-0.0232	0.0016	3.792e-45	-0.0184	0.0019	7.268e-23	0.2188	not_sig	0.00714575	0.00297481	0.00891154	0.00274247	0.65935	not_sig	0.00507587	0.0030767	-0.0157984	0.002753	3.80654e-07	sig	-0.00051242	0.00095913	-0.00063581	0.001239	0.958545	not_sig	-0.00096569	0.0019289	-0.00011603	0.0016897	0.731434	not_sig
22	39139913	T	C	logTG	-0.0149	0.0017	5.796e-18	-0.0174	0.0019	3.959e-19	0.9591	not_sig	0.00124094	0.00308078	-0.00131245	0.00282831	0.537446	not_sig	0.00317892	0.00318657	0.0100552	0.00283892	0.105591	not_sig	0.00028887	0.00099334	0.00036962	0.001278	0.982149	not_sig	-0.00067545	0.0019977	0.0015929	0.0017428	0.354457	not_sig
22	44324730	T	C	logTG	0.0178	0.0019	8.119e-21	0.0088	0.0022	5.142e-05	0.07474	not_sig	0.00719367	0.00356252	0.00506441	0.00326868	0.656446	not_sig	-0.0139611	0.0036842	-0.0074251	0.0032813	0.183306	not_sig	0.0013306	0.0011489	-0.00082308	0.0014771	0.209676	not_sig	-0.00051859	0.0023106	0.0033651	0.0020144	0.166788	not_sig
22	46687681	C	G	logTG	-0.0245	0.003	3.024e-16	-0.0261	0.0034	1.786e-14	0.7992	not_sig	-0.0151764	0.00509124	-0.0162983	0.00465344	0.869504	not_sig	0.00506452	0.00526548	0.00630541	0.00467125	0.859454	not_sig	0.0029767	0.0016396	0.00018679	0.0021005	0.189236	not_sig	0.0033793	0.0032974	-0.0038138	0.0028646	0.0772785	not_sig
22	50165082	A	G	logTG	0.0291	0.0053	4.194e-08	0.0351	0.006	5.752e-09	0.2889	not_sig	-0.0319635	0.00916251	-0.0183542	0.00839914	0.268766	not_sig	0.0316342	0.00947784	0.0209025	0.00843017	0.395447	not_sig	-0.0021707	0.0028626	0.0023034	0.0036748	0.317349	not_sig	0.0040907	0.0057569	0.0081062	0.0050115	0.543464	not_sig
22	50746706	T	C	logTG	0.0147	0.0032	4.364e-06	0.022	0.0036	9.954e-10	0.3301	not_sig	-0.0250631	0.00541762	-0.0123226	0.00496415	0.0798949	not_sig	-0.00438103	0.0056033	-0.00434241	0.00498308	0.995873	not_sig	0.00049291	0.0017293	-0.0028707	0.0022198	0.273067	not_sig	0.0036281	0.0034777	0.0033626	0.0030272	0.98416	not_sig
3	4762734	A	T	logTG	0.0107	0.0017	1.096e-10	0.0124	0.0019	6.131e-11	0.914	not_sig	0.000761195	0.00295052	0.00426375	0.00271335	0.377467	not_sig	0.00071355	0.00306846	0.000284509	0.00272523	0.916372	not_sig	-0.00067056	0.00095378	0.00019514	0.0012309	0.523245	not_sig	0.0030485	0.001929	-0.0015608	0.0016857	0.0560002	not_sig
3	9498143	A	G	logTG	-0.015	0.0029	1.606e-07	-0.0159	0.0033	1.138e-06	0.435	not_sig	-0.0221329	0.00481298	-0.0191707	0.0044169	0.646943	not_sig	-0.00675995	0.00500546	-0.00486372	0.00443737	0.775852	not_sig	0.00033542	0.0015648	-0.0012083	0.0020161	0.56822	not_sig	-0.0055231	0.0031648	-0.0056659	0.002761	0.912486	not_sig
3	12383714	A	G	logTG	0.0239	0.0024	2.515e-23	0.0284	0.0028	1.002e-24	0.2655	not_sig	-0.0123198	0.00445256	-0.015848	0.00410865	0.556395	not_sig	-0.00848745	0.00463017	-0.00533567	0.004127	0.609776	not_sig	0.0029404	0.0014461	0.0029293	0.0018736	0.645322	not_sig	0.0020934	0.0029247	0.00071945	0.0025659	0.72016	not_sig
3	15667215	A	C	logTG	-0.0083	0.0017	1.129e-06	-0.0072	0.0019	0.0002159	0.5742	not_sig	-0.00677551	0.00305102	-0.0119871	0.00280353	0.203934	not_sig	-0.00177968	0.00317278	-0.0109038	0.00281533	0.0307333	not_sig	-0.00026726	0.00099142	-0.00051125	0.0012784	0.944454	not_sig	0.00021381	0.0020051	-0.00075335	0.0017507	0.693031	not_sig
3	23368583	A	G	logTG	-0.0115	0.0016	2.952e-12	-0.0064	0.0019	0.0006412	0.2155	not_sig	-0.00348829	0.00292986	0.0024523	0.00269246	0.131568	not_sig	-0.00486639	0.00304678	-0.00174387	0.00270416	0.44137	not_sig	-0.00041763	0.00095179	-6.0674e-06	0.0012277	0.743267	not_sig	0.0005538	0.001925	0.00066346	0.0016814	0.952882	not_sig
3	24520283	A	G	logTG	-0.0148	0.0019	1.392e-15	-0.0175	0.002	1.048e-17	0.9579	not_sig	NA	NA	NA	NA	NA	NA	NA	NA	NA	NA	NA	NA	-0.00056388	0.001059	0.00093291	0.0013631	0.385025	not_sig	0.0029696	0.0021419	0.00024407	0.0018668	0.319127	not_sig
3	37025661	T	C	logTG	-0.011	0.0017	3.845e-11	-0.0108	0.0019	1.538e-08	0.9558	not_sig	-0.00573789	0.00293606	-0.00407332	0.00269332	0.673036	not_sig	-0.00600894	0.00305377	0.000841305	0.00270529	0.0916985	not_sig	0.0016837	0.00095291	0.0016	0.0012264	0.656921	not_sig	-0.0017535	0.0019273	-0.00050506	0.0016796	0.618001	not_sig
3	49145304	A	G	logTG	0.0132	0.002	2.522e-11	0.0164	0.0023	1.272e-12	0.5699	not_sig	-0.000772091	0.0035078	-0.00781221	0.00321667	0.135155	not_sig	0.0163841	0.00364807	0.0243016	0.00323087	0.102699	not_sig	-0.00047105	0.0011447	-0.0019864	0.0014723	0.542535	not_sig	-0.0056692	0.002315	-0.0082552	0.0020162	0.304244	not_sig
3	52346240	T	G	logTG	-0.0171	0.0022	2.294e-15	-0.0232	0.0025	1.156e-20	0.3827	not_sig	-0.00335821	0.00378397	-0.0053899	0.00347447	0.68955	not_sig	-0.0145923	0.00393529	-0.0256068	0.00348953	0.0354296	not_sig	0.0017129	0.0012297	0.0022825	0.0015842	0.945776	not_sig	-0.003452	0.002487	-0.0037973	0.0021695	0.862925	not_sig
3	57533658	T	C	logTG	0.0114	0.0021	7.79e-08	0.0133	0.0025	7.838e-08	0.6544	not_sig	-0.00359811	0.00382745	0.00649655	0.00351036	0.0496154	not_sig	4.27297e-05	0.00398019	-0.00269343	0.00352498	0.605223	not_sig	-0.0023929	0.0012437	-0.0044176	0.0016008	0.667504	not_sig	0.00087865	0.0025154	-0.0025424	0.0021923	0.266176	not_sig
3	66868609	T	C	logTG	-0.0095	0.0018	9.091e-08	-0.0113	0.002	1.38e-08	0.7082	not_sig	0.00310955	0.00326764	0.00429837	0.00300166	0.78668	not_sig	-0.00127351	0.00339846	-0.00787522	0.00301484	0.144407	not_sig	-0.00061863	0.0010576	-0.00079989	0.001363	0.967455	not_sig	0.0025582	0.002139	0.00058985	0.0018666	0.476455	not_sig
3	69870595	A	G	logTG	0.0072	0.0017	3.044e-05	0.0121	0.002	6.086e-10	0.04117	not_sig	-0.00549432	0.0029399	-0.00522037	0.00270482	0.944779	not_sig	0.000230557	0.0030576	0.0149471	0.00271639	0.000301391	not_sig	-0.00044361	0.00095602	0.00079293	0.001234	0.430279	not_sig	-5.0849e-05	0.0019335	-0.0040461	0.00169	0.0872132	not_sig
3	87037543	A	G	logTG	-0.0134	0.003	8.301e-06	-0.0229	0.0035	4.773e-11	0.1899	not_sig	0.0126891	0.00508376	0.0119255	0.00467958	0.911122	not_sig	0.00615337	0.0052882	-0.0154614	0.00469998	0.00215065	not_sig	0.00017979	0.0016554	0.0059878	0.0021377	0.0669831	not_sig	0.0031505	0.003348	0.002959	0.0029275	0.993437	not_sig
3	135956305	A	C	logTG	0.0213	0.0022	4.253e-22	0.0285	0.0023	1.398e-36	0.06422	not_sig	0.0177764	0.00344095	0.0177671	0.00316443	0.998397	not_sig	0.00250203	0.00357876	0.0110814	0.00317846	0.0718073	not_sig	0.00092577	0.0011202	0.00094219	0.0014456	0.858723	not_sig	-0.0027717	0.0022656	-0.0014906	0.0019798	0.67671	not_sig
3	142078759	T	C	logTG	0.0143	0.0025	8.198e-09	0.0141	0.0028	5.009e-07	0.7722	not_sig	-0.000721013	0.00433812	0.00111254	0.00396011	0.752539	not_sig	0.0103227	0.00451094	-0.00429382	0.00397773	0.014645	not_sig	-0.0010168	0.0014115	-0.0025619	0.0018093	0.675477	not_sig	-0.0049759	0.0028547	0.0010012	0.0024778	0.0959659	not_sig
3	142660706	A	G	logTG	0.0106	0.0017	8.907e-10	0.0154	0.002	7.196e-15	0.003885	not_sig	0.00122444	0.00306689	-0.00025216	0.00280896	0.719881	not_sig	0.0028644	0.00318941	0.000438319	0.00282107	0.567132	not_sig	-0.00013993	0.00099622	-0.0011833	0.0012803	0.600518	not_sig	-0.00066763	0.0020148	0.00055087	0.0017533	0.625936	not_sig
3	150066540	A	T	logTG	-0.0325	0.004	4.188e-16	-0.0404	0.0044	6.011e-20	0.5925	not_sig	0.00292185	0.00638294	0.0134674	0.00587364	0.219461	not_sig	-0.00512524	0.00663579	-0.0705289	0.0058994	1.37607e-13	sig	0.0012689	0.0020296	0.0032402	0.0026219	0.708918	not_sig	0.000328	0.0041048	-0.0027562	0.0035906	0.536597	not_sig
3	155535351	C	G	logTG	-0.0106	0.0018	3.758e-09	-0.0135	0.0021	9.215e-11	0.2836	not_sig	-0.00120406	0.00326796	0.00842185	0.00300393	0.028497	not_sig	-0.00141501	0.00339811	-0.00309415	0.00301742	0.710545	not_sig	0.00050019	0.0010628	-0.0018721	0.001371	0.198001	not_sig	-0.0041056	0.0021495	-0.0018197	0.0018776	0.423393	not_sig
3	156797941	T	C	logTG	-0.0219	0.0017	3.215e-40	-0.0132	0.0019	2.898e-12	0.2788	not_sig	-0.0106566	0.00298651	0.00205317	0.0027462	0.0015554	not_sig	-0.0241424	0.00310567	-0.0344291	0.00275797	0.0128622	not_sig	0.0010124	0.00097058	-0.0012979	0.0012523	0.135105	not_sig	0.00026774	0.001963	0.00157	0.001715	0.579221	not_sig
3	170732300	A	G	logTG	-0.0198	0.0023	5.651e-18	-0.0262	0.0027	3.463e-22	0.05852	not_sig	-0.0180779	0.00441771	-0.0121193	0.00404953	0.315248	not_sig	0.00240856	0.00459468	-0.00323141	0.004068	0.355954	not_sig	-0.00081804	0.0014377	-0.00094196	0.001851	0.934357	not_sig	-0.0049343	0.0029077	0.0044187	0.0025349	0.00950748	not_sig
3	172294500	A	G	logTG	-0.067	0.0054	6.469e-35	-0.0515	0.006	5.182e-18	0.1282	not_sig	0.0120806	0.00926868	0.0125063	0.00861709	0.972896	not_sig	0.00444586	0.00963945	-0.0109406	0.00865698	0.232938	not_sig	0.00077579	0.0028445	0.0032298	0.0037023	0.693775	not_sig	0.0010496	0.0057531	-0.0018235	0.0050702	0.686221	not_sig
4	951947	T	C	logTG	0.0163	0.0022	4.922e-14	0.0196	0.0025	1.786e-15	0.4487	not_sig	0.00100603	0.00386493	-0.00179464	0.00354501	0.589619	not_sig	0.0100648	0.00401196	0.0313386	0.0035643	6.84442e-05	sig	-0.0015519	0.0012502	-0.00098562	0.0016085	0.603467	not_sig	0.0037902	0.0025258	-0.0034481	0.0022011	0.0208196	not_sig
4	2888622	A	G	logTG	-0.01	0.0017	2.284e-09	-0.0138	0.0019	5.148e-13	0.1787	not_sig	-0.0078318	0.00302103	-0.00575175	0.00277251	0.608387	not_sig	-0.00282538	0.00313657	-0.00461468	0.00278759	0.668444	not_sig	-0.000427	0.00097647	0.002405	0.0012565	0.101999	not_sig	0.0021969	0.0019728	-0.0030447	0.0017195	0.0312241	not_sig
4	3443931	A	G	logTG	-0.026	0.0017	4.45e-53	-0.0303	0.0019	1.184e-55	0.2961	not_sig	-0.00328766	0.00305792	-0.00765447	0.00280207	0.287583	not_sig	-0.00476156	0.00317443	-0.00901325	0.00281733	0.314341	not_sig	0.0012923	0.00098439	0.0056943	0.0012646	0.0379256	not_sig	0.0024639	0.0019888	-0.0012732	0.0017305	0.13209	not_sig
4	4990298	A	G	logTG	-0.0106	0.0018	3.783e-09	-0.0197	0.0021	7.709e-22	0.0003643	not_sig	0.0114475	0.00293965	0.00396572	0.00269561	0.0581308	not_sig	-0.00558845	0.00305233	-0.0304958	0.00271044	8.86602e-10	sig	-0.00069694	0.00095664	-0.00048049	0.0012303	0.776466	not_sig	-9.7837e-05	0.0019328	0.0013543	0.0016836	0.535049	not_sig
4	17884986	T	C	logTG	0.0213	0.0024	2.438e-19	0.0239	0.0027	6.053e-19	0.3014	not_sig	0.00668943	0.00424116	0.0136168	0.00390076	0.224637	not_sig	0.0103296	0.00440375	0.00437987	0.00392195	0.310872	not_sig	0.003037	0.001379	-0.00029252	0.0017793	0.0762464	not_sig	0.00044179	0.0027861	0.00048838	0.0024348	0.983708	not_sig
4	26047616	A	G	logTG	0.0186	0.0023	8.654e-16	0.0255	0.0026	3.013e-22	0.1965	not_sig	0.00189471	0.00389877	0.0133207	0.00359093	0.0294563	not_sig	0.00378643	0.00404741	0.0313884	0.00361009	3.19092e-07	sig	0.00042352	0.0012677	0.001312	0.0016367	0.767421	not_sig	-0.0021957	0.0025613	0.00018174	0.0022397	0.464146	not_sig
4	39698824	A	G	logTG	0.0051	0.0016	0.001759	0.0116	0.0018	2.801e-10	0.1168	not_sig	0.000965803	0.00292229	0.00145747	0.0026821	0.900365	not_sig	-0.000618132	0.00303371	0.000794042	0.00269668	0.726753	not_sig	-0.0005597	0.00095416	-0.0016219	0.001228	0.647066	not_sig	-0.00027799	0.0019278	0.0010822	0.0016804	0.563031	not_sig
4	69588052	T	C	logTG	-0.0187	0.0018	3.346e-26	-0.0103	0.002	4.033e-07	0.0004091	not_sig	0.00230682	0.0032361	-0.00369641	0.00296609	0.167187	not_sig	-0.00806757	0.00335964	0.00178427	0.00298231	0.0276162	not_sig	0.0008743	0.0010504	0.0017555	0.0013501	0.796917	not_sig	-0.0039644	0.0021222	0.0034771	0.0018474	0.00468321	not_sig
4	74512280	A	G	logTG	-0.133	0.0285	3.024e-06	-0.1824	0.0302	1.564e-09	0.372	not_sig	-0.05851	0.0851652	0.175411	0.0873083	0.052714	not_sig	0.0182269	0.0884368	0.072329	0.0877945	0.662777	not_sig	NA	NA	NA	NA	NA	NA	NA	NA	NA	NA	NA	NA
4	77421345	T	C	logTG	-0.0119	0.0016	3.037e-13	-0.0084	0.0019	6.448e-06	0.1804	not_sig	0.00151609	0.0029425	0.00418845	0.00269915	0.499043	not_sig	0.0020176	0.0030549	0.00428398	0.00271401	0.57748	not_sig	0.00011924	0.00095495	0.001478	0.0012287	0.467905	not_sig	0.0063222	0.0019293	0.00067509	0.0016814	0.0221351	not_sig
4	87294293	A	C	logTG	-0.0145	0.0017	1.14e-16	-0.0161	0.002	1.964e-16	0.9993	not_sig	-0.00346354	0.00304103	-0.00171776	0.00278935	0.669151	not_sig	-0.00109304	0.00315708	-0.00158168	0.00280463	0.907477	not_sig	0.00082402	0.00098543	0.0011607	0.0012673	0.994291	not_sig	0.0020096	0.001991	-0.0010408	0.0017341	0.219698	not_sig
4	88053085	T	C	logTG	-0.0288	0.0017	6.733e-68	-0.0262	0.0019	1.045e-44	0.3854	not_sig	-0.00124797	0.00299665	-0.00807878	0.00274393	0.0894956	not_sig	-0.00458538	0.00311107	-0.0069367	0.00275896	0.570061	not_sig	-0.00029362	0.00097244	0.00095421	0.0012487	0.454091	not_sig	0.00053162	0.0019647	-0.0025161	0.0017087	0.202393	not_sig
4	89724963	C	G	logTG	0.0103	0.0016	1.545e-10	0.0151	0.0018	2.447e-16	0.04098	not_sig	-0.011561	0.00293407	-0.00379515	0.00269001	0.0487753	not_sig	0.00811786	0.00304616	0.0437491	0.00270481	1.56032e-18	sig	0.00024072	0.00095212	-0.001509	0.0012242	0.302514	not_sig	0.0017686	0.0019237	0.00019076	0.0016752	0.521304	not_sig
4	100045616	T	C	logTG	-0.0173	0.0018	1.328e-21	-0.009	0.0021	1.763e-05	0.00438	not_sig	-0.00160894	0.0031769	0.000508658	0.00291927	0.620074	not_sig	-0.00833623	0.00329833	-0.00675282	0.00293535	0.718699	not_sig	0.0012537	0.0010335	0.00010627	0.0013316	0.389335	not_sig	0.0053156	0.0020881	0.00024783	0.0018222	0.0570207	not_sig
4	103188709	T	C	logTG	-0.0365	0.0034	3.496e-26	-0.0373	0.004	2.932e-20	0.995	not_sig	-0.0485083	0.00552257	-0.046728	0.00512715	0.811395	not_sig	0.0270112	0.00573435	0.0382485	0.00515512	0.143258	not_sig	0.0027925	0.001796	0.0036811	0.002338	0.930431	not_sig	0.0049585	0.0036285	0.0090149	0.0031992	0.328274	not_sig
4	103861380	A	G	logTG	-0.0082	0.0016	4.909e-07	-0.0138	0.0019	1.278e-13	0.00437	not_sig	-0.00846466	0.00292107	-0.00606371	0.00268415	0.540994	not_sig	-8.01206e-05	0.0030327	0.000558222	0.00269901	0.874512	not_sig	0.0018456	0.00094816	0.0017184	0.0012219	0.610873	not_sig	-0.001907	0.0019157	0.0010296	0.001672	0.21966	not_sig
4	110095620	T	C	logTG	0.112	0.0121	1.5e-20	0.127	0.0132	7.355e-22	0.3755	not_sig	0.00547574	0.0182063	0.0153048	0.0165692	0.686738	not_sig	-0.0063128	0.0188951	-0.0254001	0.0166615	0.446646	not_sig	-0.0032225	0.0058409	-0.0070144	0.0074565	0.825391	not_sig	0.00089543	0.011801	0.0092878	0.010204	0.552329	not_sig
4	110638824	T	C	logTG	-0.1281	0.0116	1.588e-28	-0.1389	0.0131	2.54e-26	0.5084	not_sig	NA	NA	NA	NA	NA	NA	NA	NA	NA	NA	NA	NA	0.0076078	0.0055876	0.010559	0.0071674	0.978783	not_sig	-0.0045171	0.011289	-0.0083367	0.0098079	0.76624	not_sig
[truncated: 1,001 more rows]
