# Supplementary material for: Implicating genes, pleiotropy, and sexual dimorphism at blood lipid loci through multi-ancestry meta-analysis
Source: Genome Biol. 2022 Dec 27;23:268. doi: 10.1186/s13059-022-02837-1 (PMC9793579; doi:10.1186/s13059-022-02837-1)
Supplement: Supplementary file 30 — Additional file 30: Table S20. Colocalization results for the sex-specific loci. [file 13059_2022_2837_MOESM30_ESM.xlsx]

## Sheet: Sheet1
Table S20. Colocalization results for the loci showing sex-specific effects
trait	Chr	Position	Ref	Alt	rsID	StdErr	men_Effect	women_Effect	Tissue	GeneName	Colocgene	Coloc PP4	eqtlpos	eQTLmalebeta	eQTLmalep	eQTLVar	eQTLfemalebeta	eQTLfemalep	Male_Phewas	Female_Phewas
LDL	1	27021913	C	G	rs114165349	0.0045	-0.0584	-0.1121	Adipose_Subcutaneous	PIGV	ENSG00000060642	0.813286	27021913	-0.734668	3.85e-06	chr1_26695422_G_C_b38	-0.642936	0.00875579	Disorders of lipoid metabolism,Hyperlipidemia,Alanine_aminotransferase,Alkaline_phosphatase,ApoB,HDL_cholesterol,IGF1,LDL_cor,Lymphocyte_percentage,SHBG,Testosterone,Total_bilirubin,Triglycerides,Urate	Hypercholesterolemia,Alanine_aminotransferase,ApoA,ApoB,Creatinine,HDL_cholesterol,IGF1,LDL_cor,Platelet_count,Platelet_crit,SHBG,Total_bilirubin,Triglycerides,Urate
nonHDL	1	27021913	C	G	rs114165349	0.0052	-0.0717	-0.1201	Adipose_Subcutaneous	PIGV	ENSG00000060642	0.819206	27021913	-0.734668	3.85e-06	chr1_26695422_G_C_b38	-0.642936	0.00875579	Disorders of lipoid metabolism,Hyperlipidemia,Alanine_aminotransferase,Alkaline_phosphatase,ApoB,HDL_cholesterol,IGF1,LDL_cor,Lymphocyte_percentage,SHBG,Testosterone,Total_bilirubin,Triglycerides,Urate	Hypercholesterolemia,Alanine_aminotransferase,ApoA,ApoB,Creatinine,HDL_cholesterol,IGF1,LDL_cor,Platelet_count,Platelet_crit,SHBG,Total_bilirubin,Triglycerides,Urate
LDL	1	27021913	C	G	rs114165349	0.0045	-0.0584	-0.1121	Adipose_Subcutaneous	RP5-968P14.2	ENSG00000260063	0.820097	27021913	-0.374485	0.0407041	chr1_26695422_G_C_b38	-0.468049	0.110433	Disorders of lipoid metabolism,Hyperlipidemia,Alanine_aminotransferase,Alkaline_phosphatase,ApoB,HDL_cholesterol,IGF1,LDL_cor,Lymphocyte_percentage,SHBG,Testosterone,Total_bilirubin,Triglycerides,Urate	Hypercholesterolemia,Alanine_aminotransferase,ApoA,ApoB,Creatinine,HDL_cholesterol,IGF1,LDL_cor,Platelet_count,Platelet_crit,SHBG,Total_bilirubin,Triglycerides,Urate
nonHDL	1	27021913	C	G	rs114165349	0.0052	-0.0717	-0.1201	Adipose_Subcutaneous	RP5-968P14.2	ENSG00000260063	0.821918	27021913	-0.374485	0.0407041	chr1_26695422_G_C_b38	-0.468049	0.110433	Disorders of lipoid metabolism,Hyperlipidemia,Alanine_aminotransferase,Alkaline_phosphatase,ApoB,HDL_cholesterol,IGF1,LDL_cor,Lymphocyte_percentage,SHBG,Testosterone,Total_bilirubin,Triglycerides,Urate	Hypercholesterolemia,Alanine_aminotransferase,ApoA,ApoB,Creatinine,HDL_cholesterol,IGF1,LDL_cor,Platelet_count,Platelet_crit,SHBG,Total_bilirubin,Triglycerides,Urate
HDL	1	155000000	A	T	rs9616	0.0014	0.0044	0.016	Liver	ADAR	ENSG00000160710	0.856757	155000000	-0.239059	0.0640645	chr1_154583257_A_T_b38	-0.124623	0.611634	NA	NA
HDL	1	155000000	A	T	rs9616	0.0014	0.0044	0.016	Adipose_Subcutaneous	AQP10	ENSG00000143595	0.876457	155000000	0.0757593	0.591768	chr1_154583257_A_T_b38	-0.235633	0.048697	NA	NA
HDL	1	235000000	T	C	rs553427	0.0013	-0.0197	-0.011	Liver	RP4-781K5.7	ENSG00000282097	0.889091	235000000	-0.452986	0.0146528	chr1_234717013_C_T_b38	-0.721111	0.000160222	NA	NA
HDL	2	48962291	T	G	rs17326656	0.0015	0.005	0.0265	Adipose_Subcutaneous	LHCGR	ENSG00000138039	0.847259	48962291	-0.369715	5.16e-06	chr2_48735152_G_T_b38	-0.287193	0.0139756		ApoA,HDL_cholesterol,Triglycerides
LDL	4	69491284	A	T	rs4860987	0.0018	0.0422	0.016	Liver	RP11-1267H10.2	ENSG00000249472	0.82538	69491284	0.679386	0.0080557	chr4_68625566_A_T_b38	0.382716	0.104424	Disorders of lipoid metabolism,Hyperlipidemia,Hypercholesterolemia,Alkaline_phosphatase,ApoA,ApoB,IGF1,LDL_cor,SHBG,TC_cor,Testosterone,Triglycerides,Urate	Alkaline_phosphatase,IGF1
LDL	4	69491284	A	T	rs4860987	0.0018	0.0422	0.016	Liver	RP11-1267H10.1	ENSG00000251101	0.830243	69491284	0.375478	0.0904991	chr4_68625566_A_T_b38	0.257809	0.239861	Disorders of lipoid metabolism,Hyperlipidemia,Hypercholesterolemia,Alkaline_phosphatase,ApoA,ApoB,IGF1,LDL_cor,SHBG,TC_cor,Testosterone,Triglycerides,Urate	Alkaline_phosphatase,IGF1
nonHDL	4	69491284	A	T	rs4860987	0.0021	0.0523	0.0147	Liver	RP11-1267H10.2	ENSG00000249472	0.834344	69491284	0.679386	0.0080557	chr4_68625566_A_T_b38	0.382716	0.104424	Disorders of lipoid metabolism,Hyperlipidemia,Hypercholesterolemia,Alkaline_phosphatase,ApoA,ApoB,IGF1,LDL_cor,SHBG,TC_cor,Testosterone,Triglycerides,Urate	Alkaline_phosphatase,IGF1
nonHDL	4	69491284	A	T	rs4860987	0.0021	0.0523	0.0147	Liver	RP11-1267H10.1	ENSG00000251101	0.836599	69491284	0.375478	0.0904991	chr4_68625566_A_T_b38	0.257809	0.239861	Disorders of lipoid metabolism,Hyperlipidemia,Hypercholesterolemia,Alkaline_phosphatase,ApoA,ApoB,IGF1,LDL_cor,SHBG,TC_cor,Testosterone,Triglycerides,Urate	Alkaline_phosphatase,IGF1
nonHDL	4	69491284	A	T	rs4860987	0.0021	0.0523	0.0147	Liver	UGT2B17	ENSG00000197888	0.858201	69491284	0.996921	7.17e-05	chr4_68625566_A_T_b38	0.249881	0.19911	Disorders of lipoid metabolism,Hyperlipidemia,Hypercholesterolemia,Alkaline_phosphatase,ApoA,ApoB,IGF1,LDL_cor,SHBG,TC_cor,Testosterone,Triglycerides,Urate	Alkaline_phosphatase,IGF1
LDL	4	69491284	A	T	rs4860987	0.0018	0.0422	0.016	Liver	UGT2B17	ENSG00000197888	0.902212	69491284	0.996921	7.17e-05	chr4_68625566_A_T_b38	0.249881	0.19911	Disorders of lipoid metabolism,Hyperlipidemia,Hypercholesterolemia,Alkaline_phosphatase,ApoA,ApoB,IGF1,LDL_cor,SHBG,TC_cor,Testosterone,Triglycerides,Urate	Alkaline_phosphatase,IGF1
logTG	5	119000000	A	G	rs1045242	0.0014	-0.0111	-0.0289	Adipose_Visceral_Omentum	DMXL1	ENSG00000172869	0.888086	119000000	0.188849	0.000554098	chr5_119393632_A_G_b38	0.110568	0.0573521	NA	NA
HDL	5	119000000	A	G	rs1045242	0.0014	0.0082	0.0266	Adipose_Visceral_Omentum	DMXL1	ENSG00000172869	0.91036	119000000	0.188849	0.000554098	chr5_119393632_A_G_b38	0.110568	0.0573521	NA	NA
HDL	7	130000000	A	T	rs13234269	0.0013	-0.0189	-0.043	Adipose_Subcutaneous	KLF14	ENSG00000266265	0.818469	130000000	0.227286	0.000788096	chr7_130744427_T_A_b38	0.245893	6.83e-05	NA	NA
logTG	7	130000000	A	T	rs13234269	0.0013	0.0137	0.0383	Adipose_Subcutaneous	KLF14	ENSG00000266265	0.826195	130000000	0.227286	0.000788096	chr7_130744427_T_A_b38	0.245893	6.83e-05	NA	NA
nonHDL	7	130000000	A	T	rs13241165	0.0015	-0.0063	-0.0234	Adipose_Subcutaneous	KLF14	ENSG00000266265	0.841139	130000000	0.212594	0.00123822	chr7_130747779_A_T_b38	0.241621	9.27e-05	NA	NA
TC	10	114000000	C	G	rs2803619	0.0013	0.0211	0.0345	Adipose_Subcutaneous	GPAM	ENSG00000119927	0.807137	114000000	-0.0694754	0.0826045	chr10_112174626_G_C_b38	0.0245705	0.565815	NA	NA
TC	11	61588305	A	G	rs174564	0.0013	-0.0307	-0.0535	Adipose_Visceral_Omentum	TMEM258	ENSG00000134825	0.816082	61588305	0.111693	0.0728422	chr11_61820833_A_G_b38	0.0554179	0.267923	Benign neoplasm of colon,Alanine_aminotransferase,Alkaline_phosphatase,ApoA,ApoB,Eosinophill_count,Eosinophill_percentage,HDL_cholesterol,Haematocrit_percentage,Haemoglobin_concentration,IGF1,LDL_cor,Mean_corpuscular_volume,Mean_platelet_thrombocyte_volume,Mean_reticulocyte_volume,Mean_sphered_cell_volume,Monocyte_percentage,Platelet_count,Platelet_crit,Platelet_distribution_width,Pulse_rate,Red_…	Benign neoplasm of colon,Hypothyroidism,Hypothyroidism NOS,Cholelithiasis and cholecystitis,Cholelithiasis,Alkaline_phosphatase,ApoA,ApoB,Eosinophill_count,HDL_cholesterol,Haematocrit_percentage,Haemoglobin_concentration,LDL_cor,Mean_corpuscular_volume,Mean_platelet_thrombocyte_volume,Mean_sphered_cell_volume,Monocyte_percentage,Neutrophill_count,Platelet_count,Platelet_crit,Pulse_rate,Red_blood_…
TC	11	61588305	A	G	rs174564	0.0013	-0.0307	-0.0535	Liver	GANAB	ENSG00000089597	0.833916	61588305	0.129683	0.165332	chr11_61820833_A_G_b38	0.122758	0.199831	Benign neoplasm of colon,Alanine_aminotransferase,Alkaline_phosphatase,ApoA,ApoB,Eosinophill_count,Eosinophill_percentage,HDL_cholesterol,Haematocrit_percentage,Haemoglobin_concentration,IGF1,LDL_cor,Mean_corpuscular_volume,Mean_platelet_thrombocyte_volume,Mean_reticulocyte_volume,Mean_sphered_cell_volume,Monocyte_percentage,Platelet_count,Platelet_crit,Platelet_distribution_width,Pulse_rate,Red_…	Benign neoplasm of colon,Hypothyroidism,Hypothyroidism NOS,Cholelithiasis and cholecystitis,Cholelithiasis,Alkaline_phosphatase,ApoA,ApoB,Eosinophill_count,HDL_cholesterol,Haematocrit_percentage,Haemoglobin_concentration,LDL_cor,Mean_corpuscular_volume,Mean_platelet_thrombocyte_volume,Mean_sphered_cell_volume,Monocyte_percentage,Neutrophill_count,Platelet_count,Platelet_crit,Pulse_rate,Red_blood_…
TC	11	61588305	A	G	rs174564	0.0013	-0.0307	-0.0535	Adipose_Subcutaneous	FADS1	ENSG00000149485	0.860492	61588305	-0.115789	0.207164	chr11_61820833_A_G_b38	-0.110687	0.180748	Benign neoplasm of colon,Alanine_aminotransferase,Alkaline_phosphatase,ApoA,ApoB,Eosinophill_count,Eosinophill_percentage,HDL_cholesterol,Haematocrit_percentage,Haemoglobin_concentration,IGF1,LDL_cor,Mean_corpuscular_volume,Mean_platelet_thrombocyte_volume,Mean_reticulocyte_volume,Mean_sphered_cell_volume,Monocyte_percentage,Platelet_count,Platelet_crit,Platelet_distribution_width,Pulse_rate,Red_…	Benign neoplasm of colon,Hypothyroidism,Hypothyroidism NOS,Cholelithiasis and cholecystitis,Cholelithiasis,Alkaline_phosphatase,ApoA,ApoB,Eosinophill_count,HDL_cholesterol,Haematocrit_percentage,Haemoglobin_concentration,LDL_cor,Mean_corpuscular_volume,Mean_platelet_thrombocyte_volume,Mean_sphered_cell_volume,Monocyte_percentage,Neutrophill_count,Platelet_count,Platelet_crit,Pulse_rate,Red_blood_…
TC	11	61588305	A	G	rs174564	0.0013	-0.0307	-0.0535	Liver	FADS3	ENSG00000221968	0.888797	61588305	-0.334977	0.108126	chr11_61820833_A_G_b38	-0.596591	0.0037373	Benign neoplasm of colon,Alanine_aminotransferase,Alkaline_phosphatase,ApoA,ApoB,Eosinophill_count,Eosinophill_percentage,HDL_cholesterol,Haematocrit_percentage,Haemoglobin_concentration,IGF1,LDL_cor,Mean_corpuscular_volume,Mean_platelet_thrombocyte_volume,Mean_reticulocyte_volume,Mean_sphered_cell_volume,Monocyte_percentage,Platelet_count,Platelet_crit,Platelet_distribution_width,Pulse_rate,Red_…	Benign neoplasm of colon,Hypothyroidism,Hypothyroidism NOS,Cholelithiasis and cholecystitis,Cholelithiasis,Alkaline_phosphatase,ApoA,ApoB,Eosinophill_count,HDL_cholesterol,Haematocrit_percentage,Haemoglobin_concentration,LDL_cor,Mean_corpuscular_volume,Mean_platelet_thrombocyte_volume,Mean_sphered_cell_volume,Monocyte_percentage,Neutrophill_count,Platelet_count,Platelet_crit,Pulse_rate,Red_blood_…
TC	11	61588305	A	G	rs174564	0.0013	-0.0307	-0.0535	Liver	FADS1	ENSG00000149485	0.927243	61588305	-0.589964	0.00980246	chr11_61820833_A_G_b38	-0.367222	0.086466	Benign neoplasm of colon,Alanine_aminotransferase,Alkaline_phosphatase,ApoA,ApoB,Eosinophill_count,Eosinophill_percentage,HDL_cholesterol,Haematocrit_percentage,Haemoglobin_concentration,IGF1,LDL_cor,Mean_corpuscular_volume,Mean_platelet_thrombocyte_volume,Mean_reticulocyte_volume,Mean_sphered_cell_volume,Monocyte_percentage,Platelet_count,Platelet_crit,Platelet_distribution_width,Pulse_rate,Red_…	Benign neoplasm of colon,Hypothyroidism,Hypothyroidism NOS,Cholelithiasis and cholecystitis,Cholelithiasis,Alkaline_phosphatase,ApoA,ApoB,Eosinophill_count,HDL_cholesterol,Haematocrit_percentage,Haemoglobin_concentration,LDL_cor,Mean_corpuscular_volume,Mean_platelet_thrombocyte_volume,Mean_sphered_cell_volume,Monocyte_percentage,Neutrophill_count,Platelet_count,Platelet_crit,Pulse_rate,Red_blood_…
TC	11	61588305	A	G	rs174564	0.0013	-0.0307	-0.0535	Adipose_Visceral_Omentum	FADS1	ENSG00000149485	0.932344	61588305	-0.307062	0.00259184	chr11_61820833_A_G_b38	-0.285889	0.0010918	Benign neoplasm of colon,Alanine_aminotransferase,Alkaline_phosphatase,ApoA,ApoB,Eosinophill_count,Eosinophill_percentage,HDL_cholesterol,Haematocrit_percentage,Haemoglobin_concentration,IGF1,LDL_cor,Mean_corpuscular_volume,Mean_platelet_thrombocyte_volume,Mean_reticulocyte_volume,Mean_sphered_cell_volume,Monocyte_percentage,Platelet_count,Platelet_crit,Platelet_distribution_width,Pulse_rate,Red_…	Benign neoplasm of colon,Hypothyroidism,Hypothyroidism NOS,Cholelithiasis and cholecystitis,Cholelithiasis,Alkaline_phosphatase,ApoA,ApoB,Eosinophill_count,HDL_cholesterol,Haematocrit_percentage,Haemoglobin_concentration,LDL_cor,Mean_corpuscular_volume,Mean_platelet_thrombocyte_volume,Mean_sphered_cell_volume,Monocyte_percentage,Neutrophill_count,Platelet_count,Platelet_crit,Pulse_rate,Red_blood_…
logTG	12	123000000	T	G	rs488635	0.0015	-0.0079	-0.025	Adipose_Subcutaneous	HCAR3	ENSG00000255398	0.973069	123000000	0.277553	0.00245227	chr12_122718711_T_G_b38	0.161854	0.0147419	NA	NA
logTG	15	58723426	A	G	rs1077835	0.0014	0.0344	0.0602	Liver	LIPC	ENSG00000166035	0.920761	58723426	-0.41154	0.0322418	chr15_58431227_A_G_b38	-0.27785	0.0402024	Disorders of lipoid metabolism,Alkaline_phosphatase,ApoA,ApoB,HDL_cholesterol,Haematocrit_percentage,Haemoglobin_concentration,LDL_cor,TC_cor,Triglycerides,VitaminD	Alkaline_phosphatase,ApoA,ApoB,HDL_cholesterol,Haematocrit_percentage,Haemoglobin_concentration,LDL_cor,Red_blood_cell_erythrocyte_count,TC_cor,Triglycerides,VitaminD
nonHDL	15	58723426	A	G	rs1077835	0.0017	0.0296	0.02	Liver	LIPC	ENSG00000166035	0.954214	58723426	-0.41154	0.0322418	chr15_58431227_A_G_b38	-0.27785	0.0402024	Disorders of lipoid metabolism,Alkaline_phosphatase,ApoA,ApoB,HDL_cholesterol,Haematocrit_percentage,Haemoglobin_concentration,LDL_cor,TC_cor,Triglycerides,VitaminD	Alkaline_phosphatase,ApoA,ApoB,HDL_cholesterol,Haematocrit_percentage,Haemoglobin_concentration,LDL_cor,Red_blood_cell_erythrocyte_count,TC_cor,Triglycerides,VitaminD
LDL	16	56990716	A	C	rs247617	0.0014	0.0157	0.0557	Adipose_Subcutaneous	CETP	ENSG00000087237	0.929218	56990716	-0.391584	0.000173827	chr16_56956804_C_A_b38	-0.24018	0.0217957
nonHDL	16	56991363	T	C	rs183130	0.0016	0.0319	0.0583	Adipose_Subcutaneous	CETP	ENSG00000087237	0.910448	56991363	-0.391584	0.000173827	chr16_56957451_C_T_b38	-0.24018	0.0217957	ApoA,ApoB,HDL_cholesterol,LDL_cor,TC_cor,Triglycerides,VitaminD	ApoA,ApoB,HDL_cholesterol,LDL_cor,TC_cor,Triglycerides
TC	16	56991363	T	C	rs183130	0.0013	-0.0487	-0.0385	Adipose_Subcutaneous	CETP	ENSG00000087237	0.931152	56991363	-0.391584	0.000173827	chr16_56957451_C_T_b38	-0.24018	0.0217957	ApoA,ApoB,HDL_cholesterol,LDL_cor,TC_cor,Triglycerides,VitaminD	ApoA,ApoB,HDL_cholesterol,LDL_cor,TC_cor,Triglycerides
TC	19	45412079	T	C	rs7412	0.0023	0.2727	0.4525	Adipose_Subcutaneous	APOC1P1	ENSG00000214855	0.824278	45412079	0.0423672	0.812504	chr19_44908822_C_T_b38	0.0715079	0.663261	Disorders of lipoid metabolism,Hyperlipidemia,Hypercholesterolemia,Delirium dementia and amnestic and other cognitive disorders,Dementias,Alzheimers disease,Hypertension,Essential hypertension,Ischemic Heart Disease,Myocardial infarction,Angina pectoris,Coronary atherosclerosis,Other chronic ischemic heart disease, unspecified,ApoA,ApoB,CRP,Direct_bilirubin,HDL_cholesterol,High_light_scatter_reti…	Disorders of lipoid metabolism,Hyperlipidemia,Hypercholesterolemia,Overweight, obesity and other hyperalimentation,Obesity,Delirium dementia and amnestic and other cognitive disorders,Dementias,Alzheimers disease,Senile dementia,ApoA,ApoB,Body_fat_percentage,CRP,Direct_bilirubin,HDL_cholesterol,High_light_scatter_reticulocyte_count,High_light_scatter_reticulocyte_percentage,Immature_reticulocyte_…
TC	19	45412079	T	C	rs7412	0.0023	0.2727	0.4525	Adipose_Visceral_Omentum	APOC1P1	ENSG00000214855	0.825755	45412079	-0.305807	0.173636	chr19_44908822_C_T_b38	0.197716	0.453678	Disorders of lipoid metabolism,Hyperlipidemia,Hypercholesterolemia,Delirium dementia and amnestic and other cognitive disorders,Dementias,Alzheimers disease,Hypertension,Essential hypertension,Ischemic Heart Disease,Myocardial infarction,Angina pectoris,Coronary atherosclerosis,Other chronic ischemic heart disease, unspecified,ApoA,ApoB,CRP,Direct_bilirubin,HDL_cholesterol,High_light_scatter_reti…	Disorders of lipoid metabolism,Hyperlipidemia,Hypercholesterolemia,Overweight, obesity and other hyperalimentation,Obesity,Delirium dementia and amnestic and other cognitive disorders,Dementias,Alzheimers disease,Senile dementia,ApoA,ApoB,Body_fat_percentage,CRP,Direct_bilirubin,HDL_cholesterol,High_light_scatter_reticulocyte_count,High_light_scatter_reticulocyte_percentage,Immature_reticulocyte_…
TC	19	45412079	T	C	rs7412	0.0023	0.2727	0.4525	Liver	APOC1P1	ENSG00000214855	0.82576	45412079	-0.158495	0.645998	chr19_44908822_C_T_b38	-0.0131374	0.953172	Disorders of lipoid metabolism,Hyperlipidemia,Hypercholesterolemia,Delirium dementia and amnestic and other cognitive disorders,Dementias,Alzheimers disease,Hypertension,Essential hypertension,Ischemic Heart Disease,Myocardial infarction,Angina pectoris,Coronary atherosclerosis,Other chronic ischemic heart disease, unspecified,ApoA,ApoB,CRP,Direct_bilirubin,HDL_cholesterol,High_light_scatter_reti…	Disorders of lipoid metabolism,Hyperlipidemia,Hypercholesterolemia,Overweight, obesity and other hyperalimentation,Obesity,Delirium dementia and amnestic and other cognitive disorders,Dementias,Alzheimers disease,Senile dementia,ApoA,ApoB,Body_fat_percentage,CRP,Direct_bilirubin,HDL_cholesterol,High_light_scatter_reticulocyte_count,High_light_scatter_reticulocyte_percentage,Immature_reticulocyte_…
