# Supplementary material for: Implicating genes, pleiotropy, and sexual dimorphism at blood lipid loci through multi-ancestry meta-analysis
Source: Genome Biol. 2022 Dec 27;23:268. doi: 10.1186/s13059-022-02837-1 (PMC9793579; doi:10.1186/s13059-022-02837-1)
Supplement: Supplementary file 32 — Additional file 32: Table S21. Significant X chromosome results in the sex-combined and sex-stratified analysis and replication. [file 13059_2022_2837_MOESM32_ESM.xlsx]

## Sheet: Sheet1
Table S21. Significant X chromosome results in the sex-combined or sex-stratified analysis with evidence for replication
SNP ID	Position (hg19)	Associated trait	EA	NEA	EAF	N	Ancestry and GC corrected P-value MR-MEGA	Annotation (closest gene)	Effect size METAL	SE METAL	P-value METAL	Conditional effect size	Effect size ratio	novel/ known	N Males	Ancestry and GC corrected P-value for Males MR-MEGA	Beta Males METAL	SE Males METAL	P-value Males METAL	N Females	Ancestry and GC corrected P-value for Females MR-MEGA	Beta Females METAL	SE Females METAL	P-value Females METAL	P-value for the sex difference	Replication N	Replication P-value	Replication P-value for the sex difference	*Associated traits in Ukbb PheWAS (P-value<5.2e-5, corrected for 954 phenotypes & 39 markers)	**Associated traits in Ukbb PheWAS for males (P-value<5.2e-5, corrected for 954 phenotypes & 39 markers)	**Associated traits in Ukbb PheWAS for females (P-value<5.2e-5, corrected for 954 phenotypes & 39 markers)	Significant (p-value < 1e-5) and colocalized (Posterior probability P4 > 0.8) eQTL association in lipid related tissues
rs35143646	2856155	LDL	T	C	0.6352	1038070	1.83e-16	missense (ARSL)	0.0115	0.0014	8.64e-16	0.0105	1.09524	novel	613830	3.12e-09	0.0096	0.0017	1.069e-08	428179	6.19e-08	0.0173	0.0027	2.472e-10	0.1791	212111	0.7604	na	LDL, ApoB, SHBG	NA	NA
rs35143646	2856155	TC	T	C	0.6449	1100310	1.47e-14	missense (ARSL)	0.0091	0.0014	1.9e-11	0.00915	0.994536	novel	632755	1.01e-07	0.0079	0.0017	2.055e-06	505797	1.12e-08	0.0175	0.0026	1.021e-11	0.08484	213445	0.6102	na	LDL, ApoB, SHBG	NA	NA
rs35143646	2856155	nonHDL	T	C	0.6822	712983	2.08e-11	missense (ARSL)	0.0112	0.0017	7.65e-11	0.011	1.01818	novel	290898	5.82e-07	0.012	0.0023	1.892e-07	413120	5.32e-05	0.0143	0.0028	3.356e-07	0.5294	116651	0.2788	na	LDL, ApoB, SHBG	NA	NA
rs5934507	8917206	HDL	G	A	0.274	1158000	9.99e-10	intergenic (FAM9B)	-0.0076	0.0012	1.07e-10	-0.00862	0.881671	novel	695263	2.83e-14	-0.0096	0.0012	7.565e-15	505147	0.277	-0.0007	0.0024	0.7827	0.000583	133238	1.969e-06	0.1331	Testosterone, Haemoglobin_concentration, Haematocrit_percentage, Red_blood_cell_erythrocyte_count, Creatinine, Trunk_fat_free_mass, Lymphocyte_percentage, Trunk_predicted_mass, Whole_body_fat_free_mass, Whole_body_water_mass, Body_fat_percentage, Neutrophill_percentage, Trunk_fat_percentage, Total_bilirubin, IGF1, Whole_body_Impedance, Direct_bilirubin, Phosphate, BMR	Testosterone, Haematocrit_percentage, Haemoglobin_concentration, Red_blood_cell_erythrocyte_count, Whole_body_Impedance, Lymphocyte_percentage, Trunk_fat_percentage, Body_fat_percentage, Trunk_fat_free_mass, IGF1, Trunk_predicted_mass, Creatinine, Neutrophill_percentage, Phosphate, Whole_body_water_mass, Whole_body_fat_free_mass, SHBG, Trunk_fat_mass, Neutrophill_count, Pulse_rate, Hypertension, …	NA
rs191084933	14133208	HDL	G	A	0.0055	1052630	5.2e-09	intergenic (GEMIN8)	0.0694	0.0101	5.89e-12	0.102	0.680392	novel	613450	1.45e-06	0.0672	0.0116	7.199e-09	435478	0.0282	0.0561	0.018	0.001824	0.3272	153032	0.01238	na	NA	NA	NA
rs139120857	14893175	HDL	A	G	0.0553	1088700	1.16e-77	intronic (MOSPD2)	0.0501	0.0027	2.75e-79	0.0501	1	known	635306	6.12e-67	0.0543	0.003	1.901e-71	454471	6.97e-18	0.0446	0.0049	1.573e-19	0.109	107565	1.61e-09	na	HDL_cholesterol, ApoA, Lymphocyte_percentage, Neutrophill_percentage	HDL_cholesterol, ApoA	HDL_cholesterol
rs62580240	15293022	logTG	G	A	0.4523	1160340	3.65e-09	intergenic (ASB9)	-0.0071	0.0011	1.83e-10	-0.00787	0.90216	known	671410	2.69e-06	-0.0062	0.0013	1.307e-06	493189	0.000173	-0.108	0.022	7.847e-07	0.03768	126037	0.01536	na	Triglycerides	NA	NA
rs7888119	16813128	HDL	T	C	0.546	1158000	1.47e-20	intronic (TXLNG)	0.0114	0.0012	1.07e-22	0.0118	0.966102	novel	684104	2.35e-14	0.0112	0.0013	3.206e-17	505147	1.12e-05	0.0127	0.0023	2.959e-08	0.2212	209399	0.04264	na	Hyperplasia of prostate, Alkaline_phosphatase, HDL_cholesterol	Hyperplasia of prostate, Alkaline_phosphatase, HDL_cholesterol	NA
rs2230488	20204461	LDL	T	G	0.1772	1135110	6.9e-18	synonymous (RPS6KA3)	-0.0143	0.0015	2.33e-20	-0.015	0.953333	novel	656042	6.29e-13	-0.0141	0.0017	3.318e-16	480953	6.17e-06	-0.0164	0.003	7.538e-08	0.9297	242808	0.00904	na	Alkaline_phosphatase, LDL, Gamma_glutamyltransferase, Total_protein, Calcium, ApoB, Albumin	Alkaline_phosphatase, Total_protein, LDL_cor, Calcium, Albumin, Gamma_glutamyltransferase, SHBG, ApoB	Alkaline_phosphatase
rs2230488	20204461	TC	T	G	0.1745	1237380	4.68e-12	synonymous (RPS6KA3)	-0.0114	0.0014	3.07e-15	-0.0129	0.883721	novel	746335	9.87e-09	-0.0104	0.0015	9.05e-12	561539	0.000316	-0.0139	0.0029	1.137e-06	0.8906	226633	0.00277	na	Alkaline_phosphatase, LDL, Gamma_glutamyltransferase, Total_protein, Calcium, ApoB, Albumin	Alkaline_phosphatase, Total_protein, LDL_cor, Calcium, Albumin, Gamma_glutamyltransferase, SHBG, ApoB	Alkaline_phosphatase	Adipose_Subcutaneous - EIF1AX, Adipose_Visceral_Omentum - EIF1AX
rs6527977	20322238	nonHDL	A	C	0.1602	789200	3.06e-10	intergenic (RPS6KA3)	-0.0147	0.002	2.05e-13	-0.0145	1.01379	novel	361313	1.05e-06	-0.014	0.0023	9.202e-10	429731	4.08e-05	-0.018	0.0034	9.608e-08	0.7	129721	0.9596	na	Alkaline_phosphatase, LDL, Gamma_glutamyltransferase, ApoB, Total_protein, Calcium, Albumin	Alkaline_phosphatase, Total_protein, LDL_cor, Calcium, SHBG, Albumin, Gamma_glutamyltransferase, ApoB	Alkaline_phosphatase
rs12012576	21813178	logTG	G	A	0.3103	1160340	4.88e-08	intergenic (SMPX)	-0.0072	0.0012	2.21e-09	-0.00797	0.903388	novel	671903	4.31e-08	-0.0087	0.0014	1.348e-10	493189	0.322	-0.0045	0.0023	0.05538	0.4558	178030	0.1125	na	NA	NA	NA
rs150712362	37933437	logTG	C	T	0.0756	1130880	1.62e-08	intronic (SYTL5,TM4SF2)	0.0136	0.0023	2.21e-09	0.0145	0.937931	known	655055	2.94e-05	0.0128	0.0026	8.311e-07	477258	0.00973	0.0157	0.0042	0.0001954	0.2413	124803	0.8161	na	Trunk_predicted_mass, Trunk_fat_free_mass, Whole_body_water_mass, Triglycerides, BMR, Whole_body_fat_free_mass	Trunk_fat_free_mass, Trunk_predicted_mass	NA
rs6609434	46636767	HDL	C	A	0.4959	767051	4.25e-08	intergenic (SLC9A7)	0.006	0.0014	1.84e-05	0.00711	0.843882	novel	474924	4.36e-07	0.0065	0.0017	8.205e-05	309684	0.00592	0.0091	0.0029	0.001427	0.9035	210808	0.6127	na	Neutrophill_count, White_blood_cell_leukocyte_count	Neutrophill_count, White_blood_cell_leukocyte_count	NA	Liver - SLC9A7
rs113957181	49848600	HDL	A	C	0.0566	452268	1.39e-09	intronic (CLCN5)	-0.0297	0.0047	3.9e-10	-0.0285	1.04211	novel	314904	1.79e-07	-0.0267	0.005	9.586e-08	104561	0.0129	-0.0582	0.0152	0.001215	0.1896	47828	0.9205	na	Lymphocyte_count, White_blood_cell_leukocyte_count	Lymphocyte_count, White_blood_cell_leukocyte_count	NA
rs782397956	53993589	HDL	T	C	0.205	621342	2.65e-15	intronic (PHF8)	-0.0009	0.0021	0.6572	-0.00229	0.393013	novel	454562	1.65e-11	-0.0005	0.0021	0.826	213078	8.44e-05	-0.007	0.0051	0.1735	0.2585	174175	0.1207	na	NA	NA	NA
rs72305711;rs72038003	55981911	HDL	T	TTA	0.1111	534967	2.22e-22	intronic (RP13-188A5.1)	-0.0167	0.0033	2.8e-07	-0.0185	0.902703	novel	385707	7.42e-07	-0.0171	0.0035	8.013e-07	152043	0.505	-0.004	0.0092	0.6604	0.03202	35403	0.6541	na	Testosterone	Testosterone	NA
rs5914559	56139739	logTG	G	T	0.6697	738155	4.44e-16	intergenic (KLF8)	-0.0131	0.0016	5.11e-16	-0.015	0.873333	novel	472951	2.23e-15	-0.0147	0.0018	1.338e-15	278047	0.0232	-0.0122	0.0034	0.0003381	0.3224	154753	0.5057	na	Mean_platelet_thrombocyte_volume, Platelet_crit, Testosterone, High_light_scatter_reticulocyte_count, Mean_corpuscular_haemoglobin, Mean_corpuscular_volume, Haemoglobin_concentration, Platelet_distribution_width, Haematocrit_percentage, Reticulocyte_count, SBP	Mean_platelet_thrombocyte_volume, Platelet_crit, Testosterone, Haemoglobin_concentration, Haematocrit_percentage, Mean_corpuscular_volume, High_light_scatter_reticulocyte_count, Platelet_distribution_width, Mean_corpuscular_haemoglobin, Reticulocyte_count	Mean_platelet_thrombocyte_volume, Platelet_crit
rs5964416	64368487	HDL	A	C	0.0924	614283	2.68e-11	intergenic (ZC4H2)	-0.0316	0.0047	2.14e-11	-0.0272	1.16176	novel	423782	1.56e-11	-0.0353	0.005	2.793e-12	191125	0.56	-0.0001	0.0151	0.9943	0.1478	39714	0.2228	na	NA	NA	NA
rs5965342	66204144	HDL	T	C	0.2037	745721	1.2e-29	intergenic (EDA2R)	-0.0212	0.002	8.66e-26	-0.0218	0.972477	novel	469354	5.13e-30	-0.0234	0.0023	2.589e-25	263803	0.012	-0.0128	0.0043	0.00289	0.0205	192072	0.02336	na	Testosterone, Triglycerides, Urate, Trunk_fat_mass, Alanine_aminotransferase, Body_fat_percentage, HDL_cholesterol, Trunk_fat_percentage, Whole_body_fat_mass, Albumin	Testosterone, Body_fat_percentage, Trunk_fat_percentage, Whole_body_fat_mass, Trunk_fat_mass, Mean_reticulocyte_volume, Mean_sphered_cell_volume, Triglycerides, Urate, BMI, Albumin, HDL_cholesterol, Alanine_aminotransferase	NA
rs505520	66258914	logTG	C	A	0.2191	750415	2.91e-30	intergenic (EDA2R)	0.0217	0.0019	2.86e-31	0.0236	0.919492	novel	478501	7.94e-32	0.0247	0.0021	7.305e-33	268671	0.0897	0.0112	0.0042	0.006927	0.00437	213497	3.005e-08	0.1144	Testosterone, Urate, Triglycerides, Trunk_fat_mass, Alanine_aminotransferase, Body_fat_percentage, Trunk_fat_percentage, HDL_cholesterol, Whole_body_fat_mass, Albumin	Testosterone, Body_fat_percentage, Trunk_fat_percentage, Whole_body_fat_mass, Trunk_fat_mass, Urate, Mean_reticulocyte_volume, Mean_sphered_cell_volume, BMI, Triglycerides, Albumin, Alanine_aminotransferase	NA
rs11795784	67438378	HDL	G	C	0.692	541615	2.17e-09	intronic (OPHN1)	0.0053	0.0018	0.004272	0.00432	1.22685	known	389726	5.26e-08	0.0062	0.002	0.002581	210182	0.593	0.0013	0.0042	0.7627	0.1432	108795	0.03976	na	NA	NA	NA
rs771540123	67967645	nonHDL	A	G	0.0027	15311	1.61e-09	intergenic (STARD8)	-0.0202	0.115	0.8605	-0.0923	0.218852	novel	NA	NA	NA	NA	NA	NA	NA	-0.01828	0.4825	0.7049	NA	77570	0.6045	na	NA	NA	NA
rs5937000	70047788	HDL	C	T	0.4515	796971	9.55e-09	intronic (TEX11)	0.0075	0.0013	1.36e-08	0.00851	0.881316	novel	521554	2.46e-06	0.0072	0.0014	2.787e-07	311457	0.00258	0.0119	0.0028	2.801e-05	0.02603	210808	0.5615	na	High_light_scatter_reticulocyte_count, Mean_platelet_thrombocyte_volume, Benign neoplasm of uterus, Uterine leiomyoma, Reticulocyte_count, Platelet_distribution_width, Reticulocyte_percentage	Reticulocyte_count, High_light_scatter_reticulocyte_count	Benign neoplasm of uterus, Uterine leiomyoma
rs5938008	74496225	HDL	C	T	0.9167	1072550	1.24e-08	intronic (UPRT)	0.0174	0.003	4.26e-09	0.0141	1.23404	novel	625704	1.38e-07	0.0177	0.0033	8.302e-08	493815	0.219	0.0151	0.0062	0.01506	0.7235	210808	0.2486	na	NA	NA	NA
rs1802288	99890204	LDL	T	C	0.1665	714113	1.42e-16	missense (TSPAN6)	0.0159	0.0019	2.08e-17	0.0183	0.868852	novel	462806	1.71e-14	0.0166	0.0021	6.707e-16	252411	0.00848	0.0156	0.0041	0.0001327	0.9642	207824	0.00869	na	Creatinine, Urate, Cystatin_C, LDL, Trunk_fat_free_mass, Trunk_predicted_mass, Whole_body_fat_free_mass, Whole_body_water_mass, Urea, BMR, Calcium	Trunk_predicted_mass, Trunk_fat_free_mass, LDL_cor, Whole_body_fat_free_mass, Whole_body_water_mass, Creatinine, Cystatin_C, BMR, Calcium	Urate, Creatinine
rs1802288	99890204	TC	T	C	0.1684	753479	2.49e-10	missense (TSPAN6)	0.0128	0.0018	2.61e-12	0.015	0.853333	novel	482634	3.83e-10	0.0134	0.002	3.353e-11	274326	0.0199	0.0137	0.004	0.0005519	0.8646	209149	0.0135	na	Creatinine, Urate, Cystatin_C, LDL, Trunk_fat_free_mass, Trunk_predicted_mass, Whole_body_fat_free_mass, Whole_body_water_mass, Urea, BMR, Calcium	Trunk_predicted_mass, Trunk_fat_free_mass, LDL_cor, Whole_body_fat_free_mass, Whole_body_water_mass, Creatinine, Cystatin_C, BMR, Calcium	Urate, Creatinine
rs5942972	109816550	logTG	T	C	0.3804	1153320	1.34e-94	intergenic (TDGF1P3)	-0.0241	0.0012	1.19e-91	-0.0241	1	known	667266	1.73e-90	-0.0269	0.0013	1.71e-89	487535	1.87e-12	-0.0178	0.0023	7.414e-15	0.03645	124803	3.698e-25	na	Testosterone, SHBG, LDL, Triglycerides, ApoB, Albumin, Hyperlipidemia, Disorders of lipoid metabolism, Hypercholesterolemia, Mean_sphered_cell_volume, BMR, Whole_body_fat_free_mass, Whole_body_water_mass, Calcium, BMI, Mean_reticulocyte_volume, Trunk_predicted_mass, Trunk_fat_free_mass, Whole_body_fat_mass, Platelet_count, Trunk_fat_mass, Platelet_crit, Whole_body_Impedance, Red_blood_cell_erythr…	SHBG, Testosterone, LDL_cor, ApoB, Triglycerides, Albumin, Hyperlipidemia, Disorders of lipoid metabolism, Hypercholesterolemia, Mean_sphered_cell_volume, BMI, Whole_body_fat_mass, Platelet_count, Calcium, Trunk_fat_mass, BMR, Platelet_crit, Mean_reticulocyte_volume, Monocyte_percentage, Whole_body_fat_free_mass, Whole_body_water_mass, Body_fat_percentage, Coronary atherosclerosis, Neutrophill_pe…	SHBG, LDL_cor, ApoB, Albumin, Hyperlipidemia, Disorders of lipoid metabolism, Calcium, Triglycerides, Red_blood_cell_erythrocyte_count	Adipose_Visceral_Omentum - CHRDL1
rs7063103	109849421	nonHDL	T	C	0.3705	779946	1.22e-85	intergenic (CHRDL1)	-0.0304	0.0015	1.68e-86	-0.0304	1	known	358926	2.59e-06	-0.0331	0.0019	3.334e-70	422742	1.36e-21	-0.0263	0.0026	7.704e-25	0.146	27850	1.038e-06	na	Testosterone, SHBG, LDL, ApoB, Triglycerides, Albumin, Hyperlipidemia, Disorders of lipoid metabolism, Hypercholesterolemia, Mean_sphered_cell_volume, BMR, BMI, Whole_body_fat_free_mass, Calcium, Whole_body_water_mass, Mean_reticulocyte_volume, Platelet_count, Whole_body_fat_mass, Trunk_predicted_mass, Trunk_fat_free_mass, Trunk_fat_mass, Platelet_crit, Whole_body_Impedance, Red_blood_cell_erythr…	SHBG, Testosterone, LDL_cor, ApoB, Triglycerides, Albumin, Hyperlipidemia, Disorders of lipoid metabolism, Hypercholesterolemia, BMI, Platelet_count, Mean_sphered_cell_volume, Whole_body_fat_mass, Calcium, Trunk_fat_mass, Platelet_crit, Body_fat_percentage, Monocyte_percentage, BMR, Mean_reticulocyte_volume, Neutrophill_percentage, Coronary atherosclerosis, Whole_body_fat_free_mass, TC_cor, Whole…	SHBG, LDL_cor, ApoB, Albumin, Mean_sphered_cell_volume, Testosterone, Hyperlipidemia, Red_blood_cell_erythrocyte_count, Disorders of lipoid metabolism, Mean_reticulocyte_volume, Triglycerides
rs7055206	109870607	LDL	G	C	0.4079	1092760	4.01e-140	intergenic (CHRDL1)	-0.0301	0.0012	5.41e-139	-0.0301	1	known	639568	1.15e-120	-0.0318	0.0013	1.05e-124	458365	3.33e-28	-0.0275	0.0023	7.264e-32	0.9135	124791	2.352e-26	na	Testosterone, SHBG, LDL, ApoB, Triglycerides, Albumin, Hyperlipidemia, Disorders of lipoid metabolism, Hypercholesterolemia, Mean_sphered_cell_volume, BMR, BMI, Calcium, Whole_body_fat_free_mass, Whole_body_water_mass, Mean_reticulocyte_volume, Platelet_count, Whole_body_fat_mass, Trunk_predicted_mass, Trunk_fat_free_mass, Trunk_fat_mass, Platelet_crit, Whole_body_Impedance, Red_blood_cell_erythr…	SHBG, Testosterone, LDL_cor, ApoB, Triglycerides, Albumin, Hyperlipidemia, Disorders of lipoid metabolism, Hypercholesterolemia, BMI, Platelet_count, Mean_sphered_cell_volume, Whole_body_fat_mass, Calcium, Trunk_fat_mass, Platelet_crit, Body_fat_percentage, Monocyte_percentage, BMR, Mean_reticulocyte_volume, Neutrophill_percentage, TC_cor, Coronary atherosclerosis, Whole_body_fat_free_mass, Whole…	SHBG, LDL_cor, ApoB, Albumin, Mean_sphered_cell_volume, Testosterone, Red_blood_cell_erythrocyte_count, Mean_reticulocyte_volume, Hyperlipidemia, Triglycerides, Disorders of lipoid metabolism
rs5985519	109876267	TC	C	A	0.3772	1226160	1.64e-184	intergenic (CHRDL1)	-0.0332	0.0011	4.08e-184	-0.0332	1	known	742618	1.01e-173	-0.0363	0.0013	7.19e-178	554049	7.86e-25	-0.0253	0.0023	6.133e-29	0.09586	124631	5.418e-41	na	Testosterone, SHBG, LDL, ApoB, Triglycerides, Albumin, Hyperlipidemia, Disorders of lipoid metabolism, Hypercholesterolemia, Mean_sphered_cell_volume, BMR, BMI, Whole_body_fat_free_mass, Calcium, Whole_body_water_mass, Mean_reticulocyte_volume, Platelet_count, Whole_body_fat_mass, Trunk_predicted_mass, Trunk_fat_free_mass, Trunk_fat_mass, Platelet_crit, Whole_body_Impedance, Red_blood_cell_erythr…	SHBG, Testosterone, LDL_cor, ApoB, Triglycerides, Albumin, Hyperlipidemia, Disorders of lipoid metabolism, Hypercholesterolemia, BMI, Platelet_count, Mean_sphered_cell_volume, Whole_body_fat_mass, Calcium, Trunk_fat_mass, Platelet_crit, Body_fat_percentage, Monocyte_percentage, BMR, Mean_reticulocyte_volume, Neutrophill_percentage, Whole_body_fat_free_mass, Coronary atherosclerosis, TC_cor, Whole…	SHBG, LDL_cor, ApoB, Albumin, Mean_sphered_cell_volume, Testosterone, Hyperlipidemia, Red_blood_cell_erythrocyte_count, Disorders of lipoid metabolism, Triglycerides, Mean_reticulocyte_volume
rs139144471	117829694	HDL	G	T	0.0876	1098540	1.16e-08	intergenic (DOCK11)	-0.0121	0.0022	2.88e-08	-0.0119	1.01681	novel	636764	8.64e-05	-0.0108	0.0025	1.932e-05	458004	0.000302	-0.0147	0.0039	0.0002053	0.1111	206497	0.2402	na	BMR, Whole_body_fat_free_mass, Whole_body_water_mass, Trunk_fat_mass, Whole_body_fat_mass, BMI, Trunk_fat_free_mass, Trunk_predicted_mass	BMI, BMR, Whole_body_fat_mass, Whole_body_fat_free_mass, Trunk_fat_mass, Whole_body_water_mass	NA
rs6648533	122804678	HDL	C	T	0.299	1106090	2.24e-12	intronic (THOC2)	-0.01	0.0013	1.42e-14	-0.011	0.909091	novel	640576	5.07e-09	-0.01	0.0015	1.868e-11	502155	4.39e-06	-0.0125	0.0024	1.358e-07	0.4516	210808	0.8996	na	ApoA, HDL_cholesterol, IGF1, Eosinophill_count, Albumin, TC	ApoA, HDL_cholesterol, TC_cor, Albumin, Eosinophill_count	ApoA
rs5929738	135265287	HDL	C	A	0.4679	970330	3.21e-10	intronic (FHL1)	0.0071	0.0011	2.71e-10	0.00897	0.791527	novel	572550	1.85e-06	0.0072	0.0013	9.131e-08	400575	0.000551	0.007	0.0024	0.00326	0.4197	210808	0.9732	na	Triglycerides, HDL_cholesterol, ApoA, SBP	SBP	NA
rs5975692	135266089	logTG	G	A	0.465	1138740	7.87e-12	intronic (FHL1)	-0.0084	0.0011	4.4e-14	-0.00869	0.966628	novel	661727	2.94e-09	-0.0085	0.0013	1.096e-11	481225	0.00935	-0.0075	0.0022	0.0006205	0.9215	255475	0.6531	na	Triglycerides, HDL_cholesterol, ApoA	NA	NA
rs62603531	135905969	HDL	A	G	0.465	1150420	4.13e-13	intergenic (ARHGEF6)	0.0092	0.0011	6.68e-16	0.00991	0.928355	known	676474	2.75e-11	0.0098	0.0013	3.51e-14	488193	0.0206	0.0077	0.0022	0.0006082	0.644	108795	0.3656	na	Red_blood_cell_erythrocyte_count, BMI, HDL_cholesterol, ApoA, Body_fat_percentage, Whole_body_fat_mass	HDL_cholesterol, ApoA, Red_blood_cell_erythrocyte_count	BMI, Body_fat_percentage, Whole_body_fat_mass
rs2269371	153207025	TC (males only)	C	T	0.0251459	1215230	0.000115	missense (RENBP)	-0.011	0.0037	0.003224	NA	NA	novel	731759	4.59e-08	-0.0074	0.0036	0.03729	547955	0.254	-0.0187	0.0094	0.04622	0.001067	125867	0.0323	0.5778	NA	NA	NA
rs2070826	153582198	HDL	C	T	0.1427	1141020	6.65e-26	intronic (FLNA)	0.017	0.0017	1.08e-24	0.0185	0.918919	novel	687790	5.24e-24	0.0169	0.0017	9.82e-23	497030	0.000661	0.0147	0.0033	9.65e-06	0.08671	210808	0.003695	na	HDL_cholesterol, ApoA, Triglycerides, Mean_sphered_cell_volume	HDL_cholesterol, ApoA, Triglycerides	NA	Adipose_Visceral_Omentum - DNASE1L1, Adipose_Visceral_Omentum - AC245140.2
rs11593	153627145	logTG	C	A	0.1586	1143360	5.76e-21	intronic (RPL10)	-0.0166	0.0017	8.09e-23	-0.0178	0.932584	novel	664473	1.38e-15	-0.0162	0.0019	7.718e-18	483528	0.00019	-0.0163	0.0033	1.08e-06	0.8695	255475	0.003441	na	HDL_cholesterol, ApoA, Triglycerides, Mean_sphered_cell_volume, HbA1c	HDL_cholesterol, ApoA, Triglycerides	NA	Adipose_Subcutaneous - RPL10, Adipose_Subcutaneous - AC245140.2, Adipose_Subcutaneous - DNASE1L1, Adipose_Visceral_Omentum - DNASE1L1, Adipose_Visceral_Omentum - AC245140.2
rs7886627	153679609	nonHDL	G	A	0.1214	771706	9.26e-09	intergenic (FAM50A)	-0.0147	0.0022	4.86e-11	-0.0141	1.04255	novel	356164	0.00239	-0.0113	0.0025	7.653e-06	420340	6.3e-05	-0.0186	0.0038	9.566e-07	0.06819	131076	0.6311	na	HDL_cholesterol, ApoA, Triglycerides, ApoB, LDL	HDL_cholesterol, ApoA, Triglycerides	NA	Adipose_Subcutaneous - DNASE1L1, Adipose_Subcutaneous - LAGE3, Adipose_Visceral_Omentum - TAZ, Adipose_Visceral_Omentum - DNASE1L1, Adipose_Visceral_Omentum - AC245140.2, Adipose_Visceral_Omentum - FAM50A
rs1050828	153764217	LDL	T	C	0.0113	744968	2.54e-15	missense (G6PD)	-0.0514	0.0061	5.66e-17	-0.0608	0.845395	novel	467571	3.77e-15	-0.0574	0.0065	1.019e-18	249002	0.205	-0.0098	0.0214	0.6455	0.6533	107593	3.06e-05	na	NA	NA	Testosterone, Mean_corpuscular_haemoglobin_concentration
rs762517	153764734	TC	A	G	0.0142	798600	5.26e-16	intronic (G6PD)	-0.048	0.0057	2.33e-17	-0.0553	0.867993	novel	472655	1.46e-14	-0.0512	0.006	7.616e-18	302239	0.247	-0.0187	0.0094	0.04622	0.7594	107584	0.003014	na	NA	NA	Testosterone
rs151113194	154562897	HDL	T	C	0.0671	1056570	7.17e-11	intronic (CLIC2)	0.0177	0.0027	2.73e-11	0.0322	0.549689	known	620521	8.65e-08	0.0179	0.003	3.373e-09	439286	0.0571	0.0137	0.0048	0.004268	0.9663	107565	0.001539	na	HDL_cholesterol, ApoA	NA	NA
* Order of the traits in the lists is based on the association P-value, smallest P-value first, and coloring of the associated traits: blue = same direction of effect as the lipid, red = opposite direction of effect than the lipid
** Order of the traits in the lists is based on the association P-value, smallest P-value first, and coloring of the associated traits: blue = same direction of effect as the lipid, red = opposite direction of effect than the lipid. Bolded phenotypes significantly associated for the sex-specific PheWAS only
