# Supplementary material for: Implicating genes, pleiotropy, and sexual dimorphism at blood lipid loci through multi-ancestry meta-analysis
Source: Genome Biol. 2022 Dec 27;23:268. doi: 10.1186/s13059-022-02837-1 (PMC9793579; doi:10.1186/s13059-022-02837-1)
Supplement: Supplementary file 33 — Additional file 33: Table S22. Mouse genes with lipid phenotypes (silver set). [file 13059_2022_2837_MOESM33_ESM.xlsx]

## Sheet: Sheet1
Table S22. Mouse genes with lipid phenotypes (silver set)
GeneName	Mouse_Phenotype
ABCA1	decreased circulating HDL cholesterol level;abnormal lipid homeostasis;decreased circulating cholesterol level;decreased circulating HDL cholesterol level;increased circulating triglyceride level;decreased circulating HDL cholesterol level;abnormal lipid homeostasis;increased intestinal cholesterol absorption;decreased circulating HDL cholesterol level;decreased circulating cholesterol level;abno…
ABCA12	abnormal lipid homeostasis;decreased cholesterol efflux;decreased cholesterol efflux;abnormal lipid homeostasis;abnormal lipid homeostasis;increased cholesterol level
ABCA2	abnormal lipid level
ABCA3	abnormal lipid homeostasis
ABCA7	decreased circulating cholesterol level;decreased circulating HDL cholesterol level
ABCA8	decreased circulating LDL cholesterol level;decreased circulating triglyceride level;decreased circulating HDL cholesterol level;decreased circulating cholesterol level
ABCB11	decreased circulating triglyceride level;increased cholesterol level;increased cholesterol level;abnormal phospholipid level;abnormal phospholipid level;decreased circulating triglyceride level
ABCB4	decreased intestinal cholesterol absorption;abnormal lipid homeostasis;decreased circulating cholesterol level
ABCB6	abnormal circulating cholesterol level
ABCC2	increased circulating cholesterol level;abnormal circulating cholesterol level
ABCC4	decreased prostaglandin level
ABCG1	increased cholesterol level;lipidosis;decreased cholesterol efflux;abnormal lipid level;abnormal phospholipid level;increased triglyceride level
ABCG4	abnormal lipid level
ABCG8	decreased circulating cholesterol level;increased circulating phytosterol level;abnormal cholesterol homeostasis;decreased cholesterol level;increased circulating triglyceride level;increased circulating cholesterol level;abnormal circulating cholesterol level;decreased circulating cholesterol level;increased circulating triglyceride level
ABHD13	decreased circulating cholesterol level;abnormal circulating cholesterol level
ABHD16A	decreased circulating free fatty acid level;decreased circulating cholesterol level;decreased circulating free fatty acid level;decreased circulating cholesterol level;decreased circulating cholesterol level;abnormal circulating cholesterol level;abnormal phospholipid level;abnormal circulating cholesterol level;abnormal phospholipid level;decreased circulating cholesterol level;abnormal circulat…
ABHD8	abnormal circulating cholesterol level
ACACB	decreased liver triglyceride level;decreased circulating free fatty acid level;increased fatty acid oxidation;increased circulating triglyceride level;abnormal lipid homeostasis;abnormal lipid homeostasis;increased fatty acid oxidation;increased fatty acid beta-oxidation;decreased fatty acid level
ACADL	increased unsaturated fatty acid level;abnormal lipid homeostasis;increased fatty acid level;lipidosis;increased circulating free fatty acid level
ACADS	increased circulating HDL cholesterol level;increased circulating HDL cholesterol level;decreased circulating HDL cholesterol level;abnormal fatty acid oxidation
ACADVL	abnormal lipid homeostasis
ACAN	increased circulating cholesterol level;increased circulating HDL cholesterol level
ACER1	abnormal sphingomyelin level;abnormal ceramide level;decreased circulating HDL cholesterol level;decreased circulating cholesterol level;decreased sphingosine level;abnormal lipid level
ACER2	abnormal sphingolipid level
ACER3	abnormal ceramide level;abnormal ceramide level;abnormal sphingomyelin level;increased sphingosine level;abnormal sphingomyelin level;increased sphingosine level;abnormal sphingolipid level;abnormal sphingolipid level
ACMSD	abnormal circulating lipase level
ACOT11	increased fatty acid oxidation;decreased circulating HDL cholesterol level;decreased circulating cholesterol level;increased fatty acid level;increased circulating triglyceride level
ACOX1	hyperlipidemia
ACSL5	decreased circulating HDL cholesterol level;decreased circulating cholesterol level;abnormal circulating cholesterol level;decreased circulating triglyceride level
ACSL6	increased lipogenesis;decreased lipogenesis;abnormal lipogenesis
ACSS1	abnormal circulating free fatty acids level
ACTB	decreased circulating HDL cholesterol level;decreased circulating LDL cholesterol level;decreased circulating free fatty acid level;decreased circulating cholesterol level
ADAL	abnormal circulating cholesterol level;abnormal circulating HDL cholesterol level
ADIPOR1	increased circulating cholesterol level;abnormal circulating HDL cholesterol level;increased liver triglyceride level;abnormal circulating cholesterol level;abnormal circulating triglyceride level;abnormal lipid homeostasis
AEBP1	decreased circulating triglyceride level;decreased circulating cholesterol level
AGO3	abnormal circulating glycerol level
AGPAT2	increased liver triglyceride level;abnormal fatty acid level;increased circulating triglyceride level;abnormal phospholipid level;increased circulating cholesterol level;abnormal lipid homeostasis;decreased circulating free fatty acid level
AGPAT4	abnormal phospholipid level
AGRP	decreased liver triglyceride level;decreased cholesterol level;decreased circulating VLDL triglyceride level
AHRR	abnormal circulating HDL cholesterol level;decreased circulating HDL cholesterol level
AKT1	decreased liver triglyceride level;increased fatty acid oxidation
ALDH2	decreased circulating cholesterol level;decreased circulating LDL cholesterol level;decreased circulating glycerol level
ALG8	abnormal circulating cholesterol level;abnormal circulating HDL cholesterol level
ALOX12B	abnormal lipid level
ALOX5	increased circulating VLDL cholesterol level;increased prostaglandin level;increased prostaglandin level;increased circulating VLDL cholesterol level
ALOX5AP	abnormal prostaglandin level;increased prostaglandin level
ALOXE3	abnormal lipid level
AMPD2	abnormal circulating HDL cholesterol level;increased circulating cholesterol level;increased circulating LDL cholesterol level;abnormal circulating cholesterol level;increased circulating triglyceride level
ANGPTL3	decreased circulating free fatty acid level;abnormal circulating triglyceride level;decreased circulating LDL cholesterol level;decreased circulating cholesterol level;decreased circulating HDL cholesterol level;decreased circulating triglyceride level;decreased circulating cholesterol level;abnormal circulating cholesterol level;decreased circulating triglyceride level;decreased circulating trig…
ANGPTL4	decreased circulating triglyceride level;decreased circulating cholesterol level;decreased triglyceride level;abnormal circulating triglyceride level;decreased circulating triglyceride level;decreased triglyceride level;decreased circulating triglyceride level;abnormal lipid homeostasis;decreased circulating HDL cholesterol level;enhanced lipolysis;decreased circulating triglyceride level;enhance…
ANGPTL6	abnormal lipid homeostasis;increased circulating free fatty acid level;increased circulating cholesterol level
ANKRD12	decreased circulating cholesterol level
ANO6	abnormal cholesterol homeostasis
ANP32B	decreased circulating cholesterol level;decreased circulating HDL cholesterol level
ANXA11	abnormal circulating triglyceride level
AP1M2	increased circulating cholesterol level
AP2A2	increased circulating cholesterol level;increased circulating LDL cholesterol level;abnormal circulating free fatty acids level;abnormal circulating cholesterol level;abnormal circulating HDL cholesterol level;abnormal circulating LDL cholesterol level;increased circulating HDL cholesterol level
AP4E1	decreased circulating triglyceride level
APC	hyperlipidemia;increased prostaglandin level;increased circulating free fatty acid level;increased circulating free fatty acid level;increased circulating triglyceride level;increased circulating cholesterol level;hyperlipidemia;increased circulating triglyceride level
APMAP	abnormal circulating cholesterol level
APOA1	decreased circulating phospholipid level;decreased cholesterol efflux;decreased circulating HDL cholesterol level;decreased circulating cholesterol level;decreased circulating HDL cholesterol level;decreased circulating HDL cholesterol level;decreased circulating cholesterol level;increased circulating triglyceride level;decreased circulating cholesterol level;decreased circulating VLDL cholester…
APOA2	decreased circulating free fatty acid level;decreased circulating HDL cholesterol level;abnormal cholesterol homeostasis;increased circulating cholesterol level;decreased circulating cholesterol level
APOA4	decreased circulating HDL cholesterol level;decreased circulating triglyceride level;decreased circulating VLDL triglyceride level;abnormal cholesterol homeostasis;decreased circulating cholesterol level;abnormal lipid homeostasis
APOA5	increased circulating VLDL cholesterol level;increased circulating triglyceride level;increased circulating VLDL cholesterol level
APOB	decreased circulating VLDL cholesterol level;increased circulating triglyceride level;decreased circulating VLDL cholesterol level;abnormal circulating cholesterol level;decreased circulating cholesterol level;decreased circulating cholesterol level;decreased circulating cholesterol level;decreased circulating cholesterol level;decreased circulating triglyceride level;decreased circulating LDL ch…
APOBEC1	abnormal triglyceride level;abnormal lipid homeostasis;decreased circulating HDL cholesterol level;increased cholesterol level;decreased cholesterol level;decreased circulating HDL cholesterol level;increased circulating LDL cholesterol level;abnormal lipid homeostasis
APOC1	abnormal lipid level;increased circulating triglyceride level;abnormal circulating cholesterol level;increased circulating cholesterol level;increased liver triglyceride level;increased cholesterol level
APOC2	increased circulating VLDL triglyceride level;increased circulating VLDL triglyceride level;increased circulating triglyceride level;decreased circulating HDL cholesterol level;increased circulating HDL cholesterol level;increased circulating triglyceride level;decreased circulating HDL cholesterol level;increased circulating VLDL triglyceride level;abnormal circulating cholesterol level;abnormal…
APOC3	decreased circulating triglyceride level;decreased circulating triglyceride level;decreased circulating LDL cholesterol level;decreased circulating HDL cholesterol level;abnormal lipid homeostasis;decreased circulating triglyceride level;decreased circulating VLDL cholesterol level;decreased circulating cholesterol level;decreased circulating triglyceride level;decreased circulating cholesterol l…
APOC4	abnormal circulating HDL cholesterol level;abnormal circulating triglyceride level;decreased circulating HDL cholesterol level
APOD	abnormal lipid homeostasis
APOE	xanthoma;xanthoma;decreased circulating HDL cholesterol level;increased circulating cholesterol level;increased circulating LDL cholesterol level;increased circulating cholesterol level;increased circulating HDL cholesterol level;increased circulating cholesterol level;decreased brain cholesterol level;xanthoma;increased circulating cholesterol level;increased circulating cholesterol level;increa…
APOF	decreased cholesterol efflux;increased liver cholesterol level;decreased circulating triglyceride level;abnormal cholesterol homeostasis;decreased circulating triglyceride level;abnormal cholesterol homeostasis;increased circulating HDL cholesterol level
AQP3	decreased circulating triglyceride level;abnormal circulating cholesterol level;abnormal circulating HDL cholesterol level
AQP7	decreased urine glycerol level;increased glycerol level;increased glycerol level;decreased circulating glycerol level
AQP9	increased circulating glycerol level;increased circulating triglyceride level
ARHGAP23	abnormal circulating cholesterol level;abnormal circulating cholesterol level
ARHGDIA	increased circulating cholesterol level
ARHGEF38	increased circulating cholesterol level
ARID3A	increased circulating HDL cholesterol level;increased circulating triglyceride level
ARIH2	decreased circulating triglyceride level
ARNTL	increased circulating triglyceride level;increased circulating VLDL cholesterol level;abnormal lipid homeostasis;decreased circulating VLDL triglyceride level;increased circulating HDL cholesterol level;abnormal lipid level;increased liver triglyceride level;increased triglyceride level;decreased circulating HDL cholesterol level;increased circulating free fatty acid level;increased circulating L…
ARRB2	increased circulating HDL cholesterol level;abnormal circulating cholesterol level
ARRDC3	decreased circulating triglyceride level;abnormal lipid homeostasis
ARSA	abnormal lipid homeostasis
ARV1	increased unsaturated fatty acid level;decreased circulating cholesterol level;increased circulating HDL cholesterol level;decreased liver triglyceride level;decreased liver cholesterol level;increased fatty acid oxidation;decreased unsaturated fatty acid level;decreased circulating cholesterol level;increased circulating cholesterol level;increased saturated fatty acid level;decreased liver free…
ARVCF	decreased circulating HDL cholesterol level;decreased circulating cholesterol level;increased circulating triglyceride level
ASAH1	increased ceramide level;abnormal sphingomyelin level;increased sphingosine level;abnormal lipid homeostasis;abnormal ceramide level;abnormal ceramide level
ASAH2B	abnormal lipid level
ASIP	abnormal lipid homeostasis
ASPA	abnormal sphingolipid level
ASPM	abnormal circulating HDL cholesterol level;abnormal circulating cholesterol level;increased circulating HDL cholesterol level;increased circulating cholesterol level
ASXL1	decreased circulating free fatty acid level
ATAD2B	decreased circulating cholesterol level
ATAD3A	decreased circulating cholesterol level
ATG4B	abnormal circulating cholesterol level;abnormal lipid homeostasis
ATN1	abnormal circulating triglyceride level;abnormal circulating triglyceride level
ATP11A	decreased circulating cholesterol level;decreased circulating LDL cholesterol level;abnormal circulating LDL cholesterol level;decreased circulating HDL cholesterol level
ATP6V0D1	decreased circulating HDL cholesterol level;abnormal circulating HDL cholesterol level;decreased circulating cholesterol level;abnormal circulating cholesterol level
ATP8B2	abnormal circulating glycerol level
ATXN10	abnormal circulating free fatty acids level
ATXN2	abnormal lipid level;increased circulating cholesterol level
B2M	abnormal circulating triglyceride level
BAG3	decreased circulating triglyceride level;decreased circulating cholesterol level
BAHD1	decreased circulating cholesterol level;decreased circulating HDL cholesterol level
BATF3	decreased circulating triglyceride level
BAZ1B	decreased circulating cholesterol level;decreased circulating HDL cholesterol level;decreased circulating HDL cholesterol level;decreased circulating cholesterol level
BBS4	increased circulating HDL cholesterol level;increased circulating VLDL cholesterol level;increased circulating cholesterol level;increased circulating LDL cholesterol level;abnormal circulating lipid level
BCAT2	decreased circulating free fatty acid level;abnormal lipid homeostasis
BCO2	increased liver triglyceride level;increased liver triglyceride level
BEGAIN	abnormal circulating LDL cholesterol level;abnormal circulating cholesterol level
BGLAP	increased circulating triglyceride level;increased circulating triglyceride level
BHLHE40	abnormal circulating glycerol level;decreased circulating HDL cholesterol level;decreased circulating glycerol level;decreased circulating cholesterol level
BHMT	decreased circulating cholesterol level;increased triglyceride level;decreased circulating phospholipid level;abnormal phospholipid level;decreased circulating HDL cholesterol level;abnormal lipid level;abnormal circulating lipid level
BLOC1S2	decreased circulating free fatty acid level
BNIP2	decreased circulating triglyceride level;decreased circulating glycerol level
BPNT1	decreased cholesterol level;abnormal circulating apolipoprotein E level;abnormal circulating apolipoprotein level
BRD2	increased circulating cholesterol level;abnormal circulating HDL cholesterol level;increased circulating cholesterol level;abnormal circulating HDL cholesterol level;increased circulating triglyceride level;increased circulating cholesterol level;increased circulating cholesterol level;abnormal circulating HDL cholesterol level;increased circulating triglyceride level;increased circulating trigly…
BRD7	decreased circulating LDL cholesterol level
BSCL2	increased circulating cholesterol level;decreased circulating free fatty acid level;abnormal circulating triglyceride level;abnormal cholesterol homeostasis;abnormal phospholipid level;decreased circulating glycerol level;decreased circulating free fatty acid level;decreased circulating triglyceride level;decreased circulating triglyceride level;increased liver triglyceride level;increased circul…
C12orf4	increased circulating HDL cholesterol level;increased circulating cholesterol level;abnormal circulating cholesterol level;abnormal circulating HDL cholesterol level;abnormal circulating LDL cholesterol level
C1orf43	decreased circulating HDL cholesterol level;decreased circulating cholesterol level;decreased circulating triglyceride level
C1QTNF5	decreased liver triglyceride level
C2CD5	increased liver triglyceride level;increased lipogenesis;impaired lipolysis;decreased circulating free fatty acid level;decreased fatty acid oxidation
C3	decreased circulating triglyceride level;increased triglyceride level;increased triglyceride level;increased circulating free fatty acid level;increased circulating free fatty acid level;abnormal intestinal lipid absorption;abnormal lipid homeostasis;decreased circulating free fatty acid level
C5AR1	decreased circulating free fatty acid level
C9orf50	abnormal circulating HDL cholesterol level
CACFD1	increased circulating cholesterol level;increased circulating cholesterol level;increased circulating triglyceride level;increased circulating triglyceride level
CAND2	decreased circulating cholesterol level
CAV1	impaired lipolysis;increased circulating VLDL triglyceride level;increased triglyceride level;abnormal free fatty acids level;abnormal cellular cholesterol metabolism;increased circulating triglyceride level;increased circulating glycerol level;decreased fatty acid level;abnormal lipid level;impaired lipolysis;abnormal triglyceride level;decreased liver triglyceride level;abnormal circulating fre…
CBL	decreased circulating triglyceride level;abnormal lipid homeostasis;decreased circulating free fatty acid level;decreased liver triglyceride level;decreased circulating free fatty acid level
CBX6	decreased circulating HDL cholesterol level;abnormal circulating cholesterol level;decreased circulating cholesterol level;abnormal circulating HDL cholesterol level
CCDC18	abnormal circulating free fatty acids level;increased circulating triglyceride level
CCKAR	increased intestinal cholesterol absorption;abnormal cholesterol homeostasis
CCL20	abnormal circulating cholesterol level
CCL23	increased circulating cholesterol level;increased circulating HDL cholesterol level
CD160	decreased circulating triglyceride level
CD300LG	abnormal circulating cholesterol level;decreased circulating cholesterol level;abnormal circulating HDL cholesterol level
CD36	abnormal lipid homeostasis;abnormal lipid level;increased circulating HDL cholesterol level;abnormal circulating lipid level;increased circulating triglyceride level;abnormal cholesterol homeostasis;increased circulating cholesterol level;decreased triglyceride level;abnormal fatty acid level;increased liver triglyceride level;abnormal triglyceride level;abnormal intestinal lipid absorption;abnor…
CDK12	decreased circulating HDL cholesterol level
CDKAL1	increased liver triglyceride level;decreased liver triglyceride level;increased triglyceride level;decreased triglyceride level
CDKN1A	increased circulating cholesterol level
CDKN1B	increased circulating cholesterol level
CEACAM1	decreased circulating triglyceride level;increased triglyceride level;decreased fatty acid oxidation
CEACAM16	abnormal circulating free fatty acids level;decreased circulating free fatty acid level
CEACAM3	increased triglyceride level;decreased circulating triglyceride level;increased triglyceride level;decreased fatty acid oxidation;decreased fatty acid oxidation;decreased circulating triglyceride level
CEACAM4	decreased circulating triglyceride level;decreased circulating triglyceride level;increased circulating LDL cholesterol level;increased circulating HDL cholesterol level;increased circulating HDL cholesterol level;abnormal circulating triglyceride level;abnormal circulating triglyceride level;increased circulating LDL cholesterol level
CEACAM5	decreased circulating triglyceride level;increased triglyceride level;increased triglyceride level;decreased circulating triglyceride level;decreased fatty acid oxidation;decreased fatty acid oxidation
CEACAM6	decreased circulating triglyceride level;increased triglyceride level;increased triglyceride level;decreased fatty acid oxidation;decreased circulating triglyceride level;decreased fatty acid oxidation
CEACAM7	decreased circulating triglyceride level;increased triglyceride level;decreased fatty acid oxidation;decreased circulating triglyceride level;increased triglyceride level;decreased fatty acid oxidation
CEACAM8	decreased fatty acid oxidation;increased triglyceride level;decreased circulating triglyceride level
CEBPA	abnormal lipid homeostasis;increased circulating LDL cholesterol level;increased circulating triglyceride level;abnormal lipid homeostasis;increased circulating cholesterol level;increased circulating HDL cholesterol level;increased circulating triglyceride level;increased liver triglyceride level
CEL	abnormal intestinal lipid absorption;abnormal intestinal lipid absorption;abnormal intestinal lipid absorption
CELSR1	decreased circulating cholesterol level;increased circulating HDL cholesterol level;increased circulating cholesterol level
CENPO	abnormal circulating free fatty acids level;decreased circulating free fatty acid level
CEP55	abnormal cholesterol homeostasis
CERK	abnormal ceramide level
CERS1	abnormal lipid level;abnormal lipid homeostasis;abnormal lipid homeostasis;abnormal lipid level
CERS4	abnormal sphingomyelin level;abnormal ceramide level
CERS6	increased fatty acid oxidation;enhanced lipolysis;abnormal lipid homeostasis;abnormal ceramide level
CES1	abnormal apolipoprotein level;abnormal circulating apolipoprotein E level;decreased saturated fatty acid level;abnormal apolipoprotein level;increased circulating cholesterol level;increased liver triglyceride level;abnormal circulating apolipoprotein level;decreased saturated fatty acid level;decreased liver triglyceride level;decreased circulating VLDL triglyceride level;increased circulating p…
CFB	decreased circulating triglyceride level;decreased circulating triglyceride level;decreased circulating triglyceride level;decreased circulating triglyceride level;decreased circulating triglyceride level;decreased circulating triglyceride level;decreased circulating triglyceride level;decreased circulating triglyceride level
CFTR	abnormal phospholipid level
CGREF1	abnormal cholesterol homeostasis
CHD8	decreased circulating cholesterol level
CHKA	increased liver triglyceride level
CHKB	abnormal lipid level
CHMP7	abnormal cholesterol homeostasis
CIDEB	decreased circulating triglyceride level;decreased circulating free fatty acid level
CIDEC	enhanced lipolysis;enhanced lipolysis;decreased circulating free fatty acid level;increased circulating cholesterol level;decreased circulating triglyceride level
CISD2	decreased circulating triglyceride level
CLCNKA	increased urine prostaglandin level;increased urine prostaglandin level
CLCNKB	increased urine prostaglandin level;increased urine prostaglandin level
CLEC4C	decreased circulating triglyceride level
CLIC3	abnormal circulating triglyceride level
CLPS	increased circulating cholesterol level;increased circulating cholesterol level;decreased circulating triglyceride level;decreased circulating HDL cholesterol level
CNOT3	decreased circulating triglyceride level;decreased circulating triglyceride level;decreased circulating triglyceride level;decreased circulating triglyceride level;decreased circulating triglyceride level;decreased circulating triglyceride level;decreased circulating triglyceride level;decreased circulating triglyceride level;decreased circulating triglyceride level
CNPY2	decreased circulating triglyceride level
COL11A2	decreased circulating triglyceride level;decreased circulating triglyceride level
COL18A1	abnormal circulating triglyceride level;increased circulating triglyceride level;abnormal circulating cholesterol level;impaired lipolysis;abnormal circulating free fatty acids level;increased circulating VLDL triglyceride level
COPG1	decreased circulating cholesterol level;decreased circulating HDL cholesterol level;decreased circulating LDL cholesterol level
COQ4	abnormal circulating free fatty acids level
CPEB4	decreased circulating triglyceride level
CPT1A	increased circulating free fatty acid level
CPT1C	hyperlipidemia;increased circulating triglyceride level;increased glycerol level;abnormal lipid level
CRB2	decreased circulating glycerol level
CREBBP	decreased circulating free fatty acid level;decreased triglyceride level
CRISPLD2	decreased circulating triglyceride level
CRTC1	increased circulating triglyceride level
CSF2	abnormal lipid level;increased circulating free fatty acid level;increased circulating triglyceride level
CTAGE1	decreased circulating HDL cholesterol level;decreased circulating cholesterol level;decreased circulating VLDL triglyceride level;decreased circulating triglyceride level
CTAGE9	decreased circulating cholesterol level;decreased circulating VLDL triglyceride level;decreased circulating HDL cholesterol level;decreased circulating triglyceride level
CTF1	decreased circulating free fatty acid level;increased circulating cholesterol level;enhanced lipolysis
CTH	increased circulating triglyceride level
CUL7	increased circulating HDL cholesterol level
CXCL14	decreased liver triglyceride level;decreased circulating cholesterol level
CXCL9	increased circulating HDL cholesterol level;increased circulating cholesterol level
CXCR2	abnormal circulating LDL cholesterol level
CYB561	abnormal circulating triglyceride level
CYB5D1	abnormal circulating triglyceride level;decreased circulating free fatty acid level;abnormal circulating free fatty acids level
CYBA	decreased circulating triglyceride level;abnormal circulating triglyceride level
CYP11A1	abnormal lipid level
CYP17A1	increased circulating cholesterol level;abnormal circulating HDL cholesterol level;abnormal circulating cholesterol level
CYP27A1	increased liver triglyceride level;abnormal circulating cholesterol level;increased sterol level;increased fatty acid level;increased circulating VLDL cholesterol level;increased cholesterol level;decreased intestinal cholesterol absorption;increased circulating triglyceride level;increased circulating cholesterol level;increased circulating VLDL triglyceride level;decreased cholesterol level
CYP27B1	decreased circulating HDL cholesterol level;decreased circulating cholesterol level
CYP46A1	abnormal cholesterol homeostasis
CYP4F2	abnormal fatty acid oxidation
CYP4F3	abnormal fatty acid oxidation
CYP7A1	increased circulating cholesterol level;increased circulating HDL cholesterol level;abnormal lipid homeostasis;decreased intestinal cholesterol absorption;abnormal circulating HDL cholesterol level;abnormal circulating cholesterol level
CYTH3	decreased lipogenesis;decreased liver triglyceride level;decreased circulating triglyceride level
DAGLA	abnormal lipid level
DAGLB	abnormal lipid level
DBI	abnormal cholesterol homeostasis;increased liver triglyceride level;increased liver cholesterol level;increased circulating cholesterol level;increased liver cholesterol level;increased liver triglyceride level
DBN1	decreased circulating HDL cholesterol level;decreased circulating free fatty acid level;decreased circulating glycerol level;decreased circulating LDL cholesterol level;decreased circulating cholesterol level
DCAF11	abnormal circulating cholesterol level;decreased circulating cholesterol level;abnormal circulating LDL cholesterol level;decreased circulating LDL cholesterol level;abnormal circulating HDL cholesterol level
DCUN1D3	abnormal circulating cholesterol level;decreased circulating free fatty acid level;abnormal circulating free fatty acids level;decreased circulating cholesterol level
DDHD2	abnormal lipid level;increased triglyceride level
DDIT3	increased cholesterol level
DEGS1	abnormal ceramide level;abnormal ceramide level
DGAT1	decreased liver cholesterol level;decreased liver triglyceride level;decreased circulating triglyceride level;decreased liver triglyceride level;decreased circulating triglyceride level;decreased liver cholesterol level
DGAT2	abnormal lipid level;abnormal phospholipid level;decreased circulating triglyceride level;decreased circulating free fatty acid level;decreased fatty acid level;decreased triglyceride level;decreased liver triglyceride level;decreased unsaturated fatty acid level
DGKI	increased circulating glycerol level
DHCR24	decreased circulating cholesterol level;abnormal circulating cholesterol level
DHRS2	decreased circulating HDL cholesterol level;decreased circulating cholesterol level
DHRS7C	abnormal circulating LDL cholesterol level
DIO1	decreased circulating cholesterol level
DIXDC1	abnormal circulating free fatty acids level;abnormal circulating free fatty acids level
DLG4	abnormal circulating HDL cholesterol level
DLK1	hyperlipidemia;increased circulating cholesterol level
DNAJC5G	abnormal circulating cholesterol level;abnormal circulating HDL cholesterol level
DNAJC7	increased circulating cholesterol level;increased circulating cholesterol level
DNAJC9	increased circulating free fatty acid level
DNASE1L2	decreased circulating LDL cholesterol level;decreased circulating HDL cholesterol level;decreased circulating cholesterol level;abnormal circulating HDL cholesterol level;decreased circulating free fatty acid level
DPP9	decreased circulating triglyceride level
DRG2	decreased circulating triglyceride level
DUOX2	decreased circulating triglyceride level
DUSP1	decreased circulating triglyceride level;decreased circulating cholesterol level;increased prostaglandin level;decreased circulating free fatty acid level
DUSP18	abnormal cholesterol homeostasis
DUSP3	increased circulating glycerol level
DUSP7	decreased circulating cholesterol level;decreased circulating HDL cholesterol level
DYM	abnormal circulating triglyceride level;decreased circulating HDL cholesterol level;abnormal circulating cholesterol level;decreased circulating cholesterol level;decreased circulating triglyceride level
ECI1	increased triglyceride level;abnormal lipid level;increased unsaturated fatty acid level
EFR3B	decreased circulating cholesterol level
EFTUD2	abnormal circulating cholesterol level;abnormal cholesterol homeostasis;increased circulating HDL cholesterol level;increased circulating cholesterol level;abnormal circulating HDL cholesterol level
ELK4	decreased circulating HDL cholesterol level;decreased circulating glycerol level;decreased circulating triglyceride level;decreased circulating LDL cholesterol level;decreased circulating cholesterol level
ELMOD2	increased circulating HDL cholesterol level;increased circulating cholesterol level
EMC8	decreased circulating triglyceride level
EMID1	decreased circulating free fatty acid level
EML1	decreased circulating cholesterol level;decreased circulating LDL cholesterol level
ENAM	decreased circulating cholesterol level;decreased circulating triglyceride level;decreased circulating cholesterol level
ENHO	increased liver triglyceride level;increased circulating triglyceride level;abnormal lipid metabolism;abnormal lipid metabolism;increased liver triglyceride level
ENTPD5	decreased cholesterol level;decreased triglyceride level
EPGN	decreased circulating triglyceride level
EPX	increased circulating triglyceride level
ERCC1	increased liver triglyceride level
ERF	decreased circulating triglyceride level
ESR1	increased circulating HDL cholesterol level;increased circulating cholesterol level
ESR2	abnormal circulating HDL cholesterol level;decreased circulating triglyceride level
ESRRA	increased triglyceride level;abnormal lipid homeostasis
ETV3	increased circulating LDL cholesterol level
EWSR1	abnormal circulating cholesterol level
EXOC3L2	abnormal circulating glycerol level
FA2H	abnormal lipid level;abnormal galactolipid level;decreased cholesterol level
FABP1	decreased liver triglyceride level;abnormal lipid level;abnormal lipid homeostasis
FABP2	abnormal circulating lipid level;increased circulating glycerol level;decreased circulating cholesterol level
FABP4	increased fatty acid level;impaired lipolysis;decreased circulating triglyceride level
FADS1	decreased prostaglandin level;abnormal circulating lipid level;increased prostaglandin level;decreased prostaglandin level;abnormal lipid level;increased prostaglandin level
FADS2	decreased prostaglandin level;increased liver triglyceride level;decreased unsaturated fatty acid level
FADS3	decreased liver free fatty acids level;increased circulating glycerol level;increased liver free fatty acids level;decreased fatty acid level;increased fatty acid level;abnormal circulating triglyceride level
FAM110B	increased circulating free fatty acid level
FAM117B	decreased circulating HDL cholesterol level
FAM13A	increased circulating free fatty acid level;enhanced lipolysis
FAM83G	decreased circulating glycerol level;decreased circulating triglyceride level
FAR1	abnormal circulating cholesterol level;abnormal circulating HDL cholesterol level
FAR2	abnormal circulating cholesterol level;decreased circulating HDL cholesterol level;decreased circulating cholesterol level;abnormal circulating HDL cholesterol level;abnormal lipid level
FBF1	decreased circulating HDL cholesterol level;decreased circulating cholesterol level;decreased circulating triglyceride level
FBXL22	increased circulating HDL cholesterol level
FBXW10	decreased circulating cholesterol level
FCER1G	abnormal circulating cholesterol level
FFAR1	abnormal triglyceride level;abnormal triglyceride level;decreased circulating triglyceride level;increased liver triglyceride level
FFAR2	abnormal circulating free fatty acids level
FFAR3	decreased triglyceride level
FFAR4	increased circulating cholesterol level;increased circulating HDL cholesterol level;increased liver triglyceride level;increased circulating LDL cholesterol level;abnormal lipid level
FGF21	decreased fatty acid level;decreased circulating free fatty acid level;enhanced lipolysis;impaired lipolysis;increased liver triglyceride level;impaired lipolysis;abnormal lipid level;abnormal circulating free fatty acids level;increased circulating cholesterol level;increased circulating free fatty acid level;increased circulating triglyceride level;abnormal lipid homeostasis
FGF23	increased circulating cholesterol level;decreased circulating triglyceride level
FGL1	decreased circulating cholesterol level;decreased circulating free fatty acid level;increased liver triglyceride level;decreased circulating HDL cholesterol level
FNDC7	increased circulating cholesterol level;increased circulating HDL cholesterol level
FOXA3	abnormal lipid homeostasis;decreased circulating cholesterol level
FOXO1	decreased circulating VLDL triglyceride level;decreased circulating cholesterol level;abnormal lipid homeostasis;decreased liver triglyceride level;decreased circulating triglyceride level;decreased circulating free fatty acid level;decreased liver cholesterol level
FRRS1L	decreased circulating HDL cholesterol level
FUCA1	increased brain cholesterol level
G0S2	decreased liver triglyceride level;increased circulating glycerol level;enhanced lipolysis;decreased liver triglyceride level;increased circulating free fatty acid level;enhanced lipolysis
G6PC2	decreased circulating triglyceride level;decreased circulating triglyceride level
GALNT2	increased triglyceride level;decreased circulating HDL cholesterol level;decreased triglyceride lipase activity
GALR3	increased triglyceride level;increased cholesterol level
GBA	decreased circulating cholesterol level;decreased circulating cholesterol level
GCGR	increased circulating LDL cholesterol level;decreased triglyceride level
GCK	increased circulating free fatty acid level;increased circulating triglyceride level;abnormal circulating cholesterol level
GCKR	increased circulating HDL cholesterol level;abnormal circulating HDL cholesterol level
GDF1	abnormal lipid level;abnormal lipid homeostasis;abnormal lipid level;abnormal lipid homeostasis
GEMIN4	increased circulating cholesterol level;increased circulating HDL cholesterol level
GFER	abnormal lipid oxidation
GIMAP6	abnormal circulating cholesterol level;abnormal circulating HDL cholesterol level
GK5	abnormal lipid level;increased triglyceride level;increased cholesterol level;abnormal ceramide level
GNA11	increased circulating triglyceride level;decreased circulating triglyceride level;increased liver triglyceride level
GNAO1	increased circulating triglyceride level
GNMT	increased circulating cholesterol level
GOLGA7	decreased circulating triglyceride level
GPAM	decreased liver triglyceride level;decreased circulating triglyceride level;decreased liver triglyceride level;decreased circulating VLDL triglyceride level;decreased circulating cholesterol level;abnormal lipid homeostasis;decreased circulating cholesterol level;decreased circulating HDL cholesterol level;decreased circulating triglyceride level;abnormal fatty acid level
GPBAR1	increased circulating cholesterol level;abnormal cholesterol homeostasis
GPIHBP1	increased circulating VLDL cholesterol level;increased circulating cholesterol level;increased circulating triglyceride level;decreased circulating HDL cholesterol level
GPR108	abnormal circulating triglyceride level
GPR146	decreased circulating triglyceride level;abnormal circulating triglyceride level;decreased circulating cholesterol level
GPR182	decreased circulating triglyceride level
GPR42	decreased triglyceride level
GPX1	abnormal lipid level
GRIN2D	decreased circulating triglyceride level
GRIN3B	decreased circulating triglyceride level
GYS2	increased liver triglyceride level;increased liver triglyceride level
HADHA	increased circulating free fatty acid level
HADHB	abnormal lipid homeostasis
HBS1L	increased circulating cholesterol level;increased circulating HDL cholesterol level;abnormal circulating LDL cholesterol level;increased circulating HDL cholesterol level;increased circulating free fatty acid level;increased circulating free fatty acid level;increased circulating cholesterol level;abnormal circulating cholesterol level
HCAR1	impaired lipolysis
HCAR2	abnormal lipid homeostasis
HCAR3	abnormal lipid homeostasis
HELLS	decreased circulating cholesterol level;decreased circulating triglyceride level;decreased circulating LDL cholesterol level
HFE	decreased brain cholesterol level
HKDC1	increased liver triglyceride level
HMX3	decreased circulating triglyceride level;decreased circulating free fatty acid level
HNF1A	increased cholesterol level;increased circulating cholesterol level;increased circulating cholesterol level
HNF4A	abnormal lipid homeostasis;decreased circulating triglyceride level;decreased circulating free fatty acid level;increased circulating cholesterol level;decreased circulating cholesterol level
HP	decreased cholesterol efflux
HPN	decreased circulating cholesterol level;decreased circulating triglyceride level;decreased circulating cholesterol level;decreased circulating cholesterol level;decreased circulating triglyceride level;decreased circulating HDL cholesterol level;decreased circulating triglyceride level;decreased circulating HDL cholesterol level;decreased circulating HDL cholesterol level;decreased circulating HD…
HPR	decreased cholesterol efflux
HPS6	abnormal cholesterol homeostasis
HSD11B1	abnormal lipid homeostasis;decreased circulating triglyceride level;decreased circulating LDL cholesterol level;increased circulating HDL cholesterol level;increased circulating cholesterol level;abnormal circulating cholesterol level;increased circulating HDL cholesterol level
HSD17B4	abnormal lipid homeostasis;abnormal lipid level;increased fatty acid level
HSD3B7	decreased intestinal cholesterol absorption;decreased circulating triglyceride level;increased fatty acid level;increased liver triglyceride level;abnormal cholesterol homeostasis
HSPB3	abnormal circulating free fatty acids level
IFT122	decreased circulating triglyceride level
IFT140	abnormal circulating LDL cholesterol level
IFT80	decreased circulating free fatty acid level;abnormal circulating free fatty acids level
IGF2BP2	decreased circulating cholesterol level;decreased circulating free fatty acid level;abnormal liver triglyceride level;decreased circulating triglyceride level
IGFALS	decreased circulating triglyceride level
IL12A	increased circulating cholesterol level;increased circulating HDL cholesterol level
IL13	increased circulating HDL cholesterol level;abnormal circulating HDL cholesterol level
IL1RN	decreased circulating cholesterol level;decreased circulating cholesterol level
IL6R	abnormal circulating free fatty acids level
INPP5K	decreased circulating free fatty acid level;decreased circulating triglyceride level;decreased cholesterol level
INSIG1	decreased circulating triglyceride level
INSR	increased circulating triglyceride level;increased circulating free fatty acid level
INTS9	abnormal circulating LDL cholesterol level
IRF7	increased circulating triglyceride level
IRF8	abnormal circulating free fatty acids level
IRS1	abnormal lipid level;impaired lipolysis;decreased circulating HDL cholesterol level;increased circulating triglyceride level;increased circulating free fatty acid level
IRS2	increased circulating HDL cholesterol level;increased circulating free fatty acid level;increased circulating cholesterol level;abnormal lipid homeostasis;increased circulating triglyceride level
ITCH	decreased circulating cholesterol level
ITGA2	abnormal circulating triglyceride level
JUND	increased circulating cholesterol level;decreased liver triglyceride level
KDM5B	decreased circulating cholesterol level;abnormal circulating cholesterol level
KIAA1549	decreased circulating triglyceride level
KIF13B	increased circulating cholesterol level;increased circulating LDL cholesterol level;increased circulating cholesterol level;increased circulating LDL cholesterol level;increased circulating HDL cholesterol level;increased circulating HDL cholesterol level
KISS1R	decreased circulating cholesterol level;decreased circulating triglyceride level
KIT	decreased circulating HDL cholesterol level;decreased circulating LDL cholesterol level;decreased circulating cholesterol level
KLB	abnormal circulating cholesterol level;decreased circulating triglyceride level;decreased circulating cholesterol level
KLF12	decreased circulating cholesterol level
KLF15	increased circulating triglyceride level;increased glycerol level
KLHL8	abnormal cholesterol homeostasis
KMT2B	increased circulating triglyceride level;increased liver triglyceride level;increased circulating triglyceride level;increased circulating cholesterol level;increased liver free fatty acids level;increased circulating cholesterol level;increased liver free fatty acids level;increased liver triglyceride level
KPNA1	decreased circulating cholesterol level
KPNA2	decreased circulating triglyceride level;decreased circulating triglyceride level
KRT35	increased circulating LDL cholesterol level;abnormal circulating LDL cholesterol level
LAMB2	increased circulating triglyceride level;increased circulating cholesterol level
LCAT	decreased circulating cholesterol level;increased circulating triglyceride level;abnormal circulating phospholipid level;abnormal lipid level;decreased circulating HDL cholesterol level;abnormal lipid homeostasis;abnormal lipid level;abnormal cholesterol homeostasis;decreased circulating HDL cholesterol level;decreased circulating VLDL cholesterol level;increased circulating triglyceride level;de…
LCLAT1	increased fatty acid oxidation;abnormal lipid homeostasis;abnormal lipid homeostasis;decreased circulating cholesterol level
LCN2	increased circulating cholesterol level;increased circulating LDL cholesterol level;increased liver triglyceride level
LDHB	abnormal circulating HDL cholesterol level
LDLR	increased circulating LDL cholesterol level;increased circulating LDL cholesterol level;increased circulating cholesterol level;increased circulating HDL cholesterol level;decreased circulating triglyceride level;increased circulating VLDL cholesterol level;increased circulating HDL cholesterol level;increased circulating LDL cholesterol level;increased circulating LDL cholesterol level;increased…
LEPR	increased liver triglyceride level;increased circulating cholesterol level;increased circulating cholesterol level;abnormal circulating HDL cholesterol level;increased circulating free fatty acid level;increased circulating cholesterol level;decreased circulating triglyceride level;increased circulating triglyceride level;decreased prostaglandin level;abnormal circulating cholesterol level;increa…
LGI3	decreased circulating cholesterol level
LIF	decreased circulating triglyceride level
LIMA1	decreased intestinal cholesterol absorption;decreased intestinal cholesterol absorption;decreased circulating cholesterol level
LIPA	decreased circulating HDL cholesterol level;increased circulating LDL cholesterol level;increased liver triglyceride level;abnormal lipid level;increased liver cholesterol level;increased circulating free fatty acid level
LIPC	abnormal circulating phospholipid level;increased circulating cholesterol level;increased circulating cholesterol level;increased circulating cholesterol level;abnormal circulating cholesterol level;increased circulating HDL cholesterol level;abnormal circulating cholesterol level;increased circulating HDL cholesterol level;increased circulating triglyceride level;abnormal circulating phospholipi…
LIPE	increased circulating free fatty acid level;decreased liver triglyceride level;abnormal lipolysis;increased triglyceride level;decreased circulating free fatty acid level;abnormal fatty acid level;decreased triglyceride level;increased triglyceride level;increased circulating cholesterol level;decreased circulating triglyceride level;abnormal cholesterol homeostasis;decreased liver triglyceride l…
LIPG	increased circulating cholesterol level;increased circulating triglyceride level;increased circulating phospholipid level;increased circulating phospholipid level;increased circulating HDL cholesterol level;abnormal circulating HDL cholesterol level;increased circulating HDL cholesterol level;increased circulating phospholipid level;increased circulating triglyceride level;increased circulating c…
LMF1	increased circulating triglyceride level;decreased lipoprotein lipase activity;increased circulating cholesterol level;increased circulating triglyceride level;hyperchylomicronemia;decreased triglyceride lipase activity;decreased triglyceride lipase activity;decreased lipoprotein lipase activity;decreased lipoprotein lipase activity;hyperlipidemia;increased circulating cholesterol level
LNPEP	decreased circulating cholesterol level
LPAR3	decreased prostaglandin level
LPCAT1	abnormal phospholipid level;abnormal phospholipid level
LPCAT3	abnormal lipid metabolism;decreased circulating triglyceride level;decreased circulating triglyceride level;abnormal lipid metabolism
LPIN2	decreased circulating triglyceride level;increased liver triglyceride level;decreased circulating free fatty acid level
LPL	increased circulating HDL cholesterol level;increased circulating phospholipid level;increased circulating cholesterol level;increased circulating triglyceride level;increased circulating triglyceride level;increased circulating VLDL cholesterol level;increased circulating cholesterol level;hyperlipidemia;abnormal lipid homeostasis;increased circulating triglyceride level;increased cholesterol le…
LRBA	increased circulating cholesterol level;increased circulating HDL cholesterol level
LRP1	decreased circulating triglyceride level
LRP5	increased circulating VLDL cholesterol level;increased cholesterol level;increased cholesterol level
LRRC3	abnormal circulating HDL cholesterol level;abnormal circulating cholesterol level
LRRC56	abnormal cholesterol homeostasis
LRRK1	increased circulating cholesterol level;abnormal circulating HDL cholesterol level;increased circulating HDL cholesterol level
LRRK2	abnormal lipid level
LYPD3	increased circulating triglyceride level
MAP3K1	increased circulating HDL cholesterol level;increased circulating cholesterol level
MAPK10	increased circulating free fatty acid level
MAPK8IP1	decreased liver triglyceride level
MARK2	decreased circulating cholesterol level;decreased circulating triglyceride level
MARK4	decreased circulating triglyceride level;decreased circulating triglyceride level;decreased circulating cholesterol level
MATN4	increased circulating HDL cholesterol level
MBD1	abnormal circulating LDL cholesterol level;increased circulating cholesterol level;abnormal circulating HDL cholesterol level;increased circulating LDL cholesterol level;abnormal circulating cholesterol level
MBTPS1	decreased circulating cholesterol level;increased circulating LDL cholesterol level;decreased circulating HDL cholesterol level
MC4R	increased liver triglyceride level;increased circulating cholesterol level;increased liver triglyceride level;increased circulating free fatty acid level
MCL1	decreased circulating cholesterol level
MCU	abnormal circulating cholesterol level
MED11	abnormal circulating triglyceride level
METTL16	increased circulating HDL cholesterol level;increased circulating cholesterol level
MFSD2A	decreased unsaturated fatty acid level;increased fatty acid oxidation;decreased circulating triglyceride level;abnormal lipid homeostasis;increased unsaturated fatty acid level;decreased triglyceride level
MFSD2B	abnormal ceramide level;increased sphingosine level;decreased sphingosine level
MGLL	decreased fatty acid level;abnormal lipid homeostasis;decreased liver triglyceride level;decreased circulating triglyceride level;decreased circulating glycerol level;impaired lipolysis;abnormal lipolysis
MIA2	decreased circulating VLDL triglyceride level;decreased circulating cholesterol level;decreased circulating HDL cholesterol level;decreased circulating triglyceride level
MIR33A	abnormal cholesterol homeostasis;increased circulating cholesterol level;increased circulating HDL cholesterol level
MLXIP	increased fatty acid oxidation
MLXIPL	decreased fatty acid level;decreased circulating cholesterol level;decreased circulating free fatty acid level;decreased liver triglyceride level;decreased circulating free fatty acid level;decreased circulating cholesterol level;decreased circulating cholesterol level;abnormal lipid homeostasis;decreased circulating cholesterol level;decreased fatty acid level;decreased circulating triglyceride …
MMP11	decreased circulating triglyceride level;increased circulating triglyceride level
MMP9	increased prostaglandin level
MOGAT2	decreased circulating LDL cholesterol level;decreased circulating triglyceride level;decreased circulating cholesterol level;abnormal intestinal lipid absorption;decreased circulating triglyceride level;decreased circulating VLDL cholesterol level;decreased susceptibility to hyperlipidemia
MPV17	increased circulating cholesterol level
MPZL3	decreased circulating cholesterol level;decreased circulating triglyceride level;decreased liver triglyceride level;decreased circulating phospholipid level;decreased circulating free fatty acid level
MRO	decreased circulating HDL cholesterol level
MSTO1	increased circulating triglyceride level
MTOR	decreased circulating cholesterol level;decreased circulating LDL cholesterol level
MTTP	decreased circulating VLDL cholesterol level;increased liver triglyceride level;decreased circulating cholesterol level;abnormal lipid homeostasis;abnormal lipid level;abnormal lipid homeostasis;increased liver cholesterol level;decreased circulating LDL cholesterol level;abnormal circulating lipid level;abnormal circulating cholesterol level
MUC1	decreased intestinal cholesterol absorption;abnormal intestinal lipid absorption
MUC2	increased circulating triglyceride level
MYL3	decreased circulating cholesterol level;decreased circulating HDL cholesterol level
NAAA	decreased circulating glycerol level
NAB2	decreased circulating HDL cholesterol level;decreased circulating cholesterol level
NBEAL1	decreased circulating triglyceride level
NCOA1	decreased circulating cholesterol level
NCOA3	decreased circulating free fatty acid level;decreased circulating triglyceride level;decreased circulating HDL cholesterol level;decreased circulating cholesterol level;increased liver triglyceride level
NCOA5	increased liver triglyceride level
NCOA6	increased circulating cholesterol level;abnormal lipid homeostasis;abnormal triglyceride level
NEGR1	abnormal circulating triglyceride level;decreased liver triglyceride level
NES	decreased circulating cholesterol level
NEU4	increased cholesterol level;abnormal lipid level;increased unsaturated fatty acid level
NEURL4	decreased circulating cholesterol level;abnormal circulating cholesterol level
NFASC	increased circulating triglyceride level
NFATC4	decreased circulating triglyceride level
NFIL3	decreased circulating HDL cholesterol level;abnormal circulating triglyceride level
NIPAL4	increased sphingosine level;decreased sphingosine level;decreased ceramide level;increased ceramide level
NISCH	abnormal circulating HDL cholesterol level;abnormal circulating cholesterol level;abnormal circulating triglyceride level
NKG7	increased circulating cholesterol level
NODAL	increased circulating cholesterol level;increased circulating HDL cholesterol level
NOS3	hyperlipidemia;increased circulating LDL cholesterol level;increased circulating cholesterol level;increased circulating triglyceride level;increased circulating triglyceride level;decreased prostaglandin level;increased circulating triglyceride level;increased circulating free fatty acid level;increased circulating free fatty acid level
NOTUM	abnormal cholesterol homeostasis
NPC1	abnormal sphingolipid level;abnormal lipid level;abnormal cellular cholesterol metabolism;increased brain cholesterol level;increased ceramide level;abnormal phospholipid level;increased liver cholesterol level;increased liver cholesterol level;increased liver cholesterol level;abnormal lipid level;abnormal lipid homeostasis;abnormal lipid level;abnormal lipid level;sphingomyelinosis;increased br…
NPC1L1	decreased intestinal cholesterol absorption;abnormal cholesterol level;decreased susceptibility to hyperlipidemia;decreased circulating cholesterol level;decreased intestinal cholesterol absorption;abnormal triglyceride level;decreased circulating HDL cholesterol level;abnormal lipid homeostasis;abnormal intestinal lipid absorption;decreased intestinal cholesterol absorption;abnormal circulating …
NPC2	abnormal phospholipid level;increased liver cholesterol level;lipidosis;abnormal lipid level;increased cholesterol level;abnormal lipid homeostasis
NPHP3	increased circulating cholesterol level;abnormal cholesterol homeostasis;abnormal phospholipid level;abnormal circulating phospholipid level
NPL	increased circulating cholesterol level
NPTN	abnormal circulating cholesterol level
NQO1	increased triglyceride level;increased circulating triglyceride level
NR0B2	decreased circulating LDL cholesterol level;abnormal lipid homeostasis;increased liver triglyceride level;increased intestinal cholesterol absorption;decreased circulating VLDL cholesterol level;decreased circulating HDL cholesterol level;decreased circulating cholesterol level;decreased circulating cholesterol level
NR1D1	increased circulating LDL cholesterol level;decreased liver triglyceride level;increased circulating HDL cholesterol level;decreased liver cholesterol level
NR1H3	increased circulating LDL cholesterol level;increased liver cholesterol level;abnormal cholesterol homeostasis;increased circulating cholesterol level;increased circulating LDL cholesterol level;abnormal lipid homeostasis;decreased circulating triglyceride level;increased liver cholesterol level;abnormal cellular cholesterol metabolism;abnormal circulating triglyceride level
NR1H4	increased circulating triglyceride level;increased liver triglyceride level;increased circulating phospholipid level;increased circulating triglyceride level;increased circulating cholesterol level;decreased circulating free fatty acid level;increased circulating triglyceride level;increased circulating triglyceride level;increased circulating HDL cholesterol level;increased liver cholesterol lev…
NR1I3	abnormal lipid oxidation
NR5A2	decreased circulating cholesterol level
NRXN2	decreased circulating cholesterol level
NSF	decreased circulating HDL cholesterol level
NTF4	increased circulating HDL cholesterol level;abnormal circulating triglyceride level;abnormal circulating cholesterol level;abnormal circulating HDL cholesterol level;decreased circulating triglyceride level
NUAK2	decreased circulating free fatty acid level;increased circulating triglyceride level
NUBPL	increased circulating triglyceride level
NUCKS1	decreased circulating cholesterol level;decreased circulating HDL cholesterol level
NUTF2	abnormal circulating lipase level;decreased circulating lipase level
NXN	abnormal circulating triglyceride level;increased circulating HDL cholesterol level
NXNL1	abnormal lipid homeostasis
NXPH4	decreased circulating triglyceride level
OAS1	decreased circulating cholesterol level;increased circulating triglyceride level;decreased circulating HDL cholesterol level;decreased circulating LDL cholesterol level
OPA3	increased liver triglyceride level;abnormal phospholipid level
OPTN	decreased circulating HDL cholesterol level;decreased circulating cholesterol level;decreased circulating LDL cholesterol level
OR52H1	decreased circulating cholesterol level
OSBPL11	decreased circulating triglyceride level
OSM	abnormal circulating triglyceride level;abnormal circulating free fatty acids level
OTUD7B	decreased circulating cholesterol level
P2RX7	decreased circulating glycerol level
PABPC4	abnormal circulating free fatty acids level;decreased circulating HDL cholesterol level;abnormal circulating cholesterol level;decreased circulating cholesterol level;decreased circulating free fatty acid level;abnormal circulating HDL cholesterol level
PAK1	increased circulating triglyceride level
PANK1	decreased circulating triglyceride level;abnormal triglyceride level;increased liver triglyceride level;decreased fatty acid oxidation;decreased liver triglyceride level
PAOX	abnormal circulating lipase level
PARVB	decreased circulating cholesterol level
PCGF2	decreased circulating cholesterol level;decreased circulating triglyceride level
PCK1	decreased liver triglyceride level;increased circulating triglyceride level;decreased circulating triglyceride level;abnormal circulating lipid level
PCSK2	abnormal circulating cholesterol level
PCSK5	decreased circulating cholesterol level;decreased circulating HDL cholesterol level;abnormal circulating triglyceride level
PCSK9	decreased circulating cholesterol level;abnormal circulating HDL cholesterol level;decreased circulating cholesterol level;decreased circulating HDL cholesterol level;decreased circulating LDL cholesterol level;decreased circulating LDL cholesterol level;abnormal circulating triglyceride level;abnormal circulating cholesterol level;decreased circulating cholesterol level;decreased circulating HDL…
PCYT2	abnormal lipid homeostasis
PDE6B	decreased circulating triglyceride level
PDIA4	abnormal circulating free fatty acids level
PDK4	abnormal glycerol level;increased circulating free fatty acid level
PDPR	abnormal cholesterol homeostasis;increased circulating triglyceride level
PDZK1	abnormal circulating HDL cholesterol level;abnormal circulating cholesterol level;increased circulating cholesterol level;increased circulating HDL cholesterol level;increased circulating cholesterol level;increased circulating LDL cholesterol level
PEMT	abnormal circulating cholesterol level;decreased circulating HDL cholesterol level;abnormal lipid level;decreased circulating cholesterol level
PEX10	increased fatty acid level
PEX26	decreased circulating triglyceride level
PEX7	lipidosis;decreased saturated fatty acid level;increased fatty acid level;increased fatty acid level;abnormal lipid level;decreased fatty acid level
PHF11	increased circulating triglyceride level
PHRF1	increased circulating triglyceride level
PHYH	abnormal circulating lipid level;decreased circulating triglyceride level;decreased circulating free fatty acid level;lipidosis;decreased circulating cholesterol level
PIK3C2A	increased circulating cholesterol level
PIK3R1	decreased triglyceride level;abnormal lipid homeostasis
PITPNA	abnormal intestinal lipid absorption;abnormal intestinal lipid absorption;decreased circulating triglyceride level;decreased circulating triglyceride level
PITPNM1	decreased circulating cholesterol level;decreased circulating triglyceride level
PITX3	decreased circulating triglyceride level;decreased circulating cholesterol level;decreased circulating triglyceride level
PLA2G10	abnormal prostaglandin level
PLA2G15	abnormal circulating cholesterol level
PLA2G1B	abnormal intestinal lipid absorption
PLA2G2D	abnormal lipid homeostasis;decreased unsaturated fatty acid level
PLA2G3	abnormal phospholipid level
PLA2G6	increased cholesterol level;abnormal apolipoprotein level
PLCG2	decreased circulating triglyceride level;decreased circulating free fatty acid level;decreased circulating cholesterol level
PLD2	abnormal lipid level
PLIN2	decreased circulating triglyceride level;decreased liver triglyceride level;decreased circulating free fatty acid level;decreased liver triglyceride level
PLIN3	abnormal lipid homeostasis;enhanced lipolysis;increased fatty acid oxidation
PLIN4	decreased triglyceride level
PLIN5	decreased liver free fatty acids level;decreased triglyceride level;increased liver triglyceride level;increased fatty acid oxidation;abnormal sphingomyelin level;decreased liver triglyceride level;increased liver free fatty acids level;decreased fatty acid level;abnormal ceramide level;decreased triglyceride level;increased circulating free fatty acid level;enhanced lipolysis;abnormal lipid leve…
PLSCR1	abnormal circulating free fatty acids level
PLTP	decreased circulating HDL cholesterol level;increased circulating VLDL cholesterol level;abnormal phospholipid level;increased circulating LDL cholesterol level;abnormal circulating cholesterol level
PLXNB2	decreased circulating triglyceride level
PM20D1	abnormal lipid metabolism
PMCH	decreased triglyceride level
PMP2	abnormal lipid homeostasis
PNLIP	decreased circulating cholesterol level;decreased intestinal cholesterol absorption;abnormal intestinal lipid absorption;abnormal intestinal lipid absorption;decreased intestinal cholesterol absorption
PNLIPRP2	abnormal intestinal lipid absorption;abnormal intestinal lipid absorption
PNPLA1	increased cholesterol level;decreased fatty acid level;abnormal ceramide level;increased triglyceride level;abnormal free fatty acids level;abnormal sphingomyelin level;abnormal free fatty acids level;abnormal ceramide level;abnormal ceramide level
PNPLA3	increased liver triglyceride level;increased liver triglyceride level;increased liver triglyceride level;increased fatty acid level
PNPLA5	decreased circulating cholesterol level
POLR2F	abnormal circulating free fatty acids level;abnormal circulating glycerol level
PON1	increased circulating LDL cholesterol level;increased circulating VLDL cholesterol level
PON2	decreased circulating LDL cholesterol level;abnormal cholesterol homeostasis;decreased circulating VLDL cholesterol level;decreased circulating cholesterol level
PON3	decreased circulating free fatty acid level;abnormal lipid level;increased liver cholesterol level;decreased liver triglyceride level;decreased fatty acid oxidation;decreased circulating triglyceride level;increased circulating cholesterol level;increased circulating triglyceride level;decreased circulating HDL cholesterol level;increased circulating LDL cholesterol level
POR	decreased circulating cholesterol level;decreased circulating cholesterol level;decreased circulating cholesterol level;decreased circulating cholesterol level
PPARA	increased circulating cholesterol level;increased circulating free fatty acid level;increased circulating free fatty acid level;decreased fatty acid oxidation;increased circulating cholesterol level;abnormal circulating HDL cholesterol level;increased triglyceride level;increased circulating triglyceride level
PPARD	decreased liver cholesterol level;decreased circulating cholesterol level;decreased liver triglyceride level;increased fatty acid level;abnormal lipid level;increased circulating triglyceride level;increased circulating VLDL cholesterol level;decreased circulating HDL cholesterol level
PPARG	decreased circulating free fatty acid level;hyperlipidemia;increased liver triglyceride level;increased circulating free fatty acid level;increased circulating triglyceride level;abnormal lipid homeostasis;increased circulating triglyceride level;decreased circulating triglyceride level;abnormal triglyceride level;increased circulating free fatty acid level;increased circulating triglyceride leve…
PPARGC1B	increased circulating triglyceride level;increased liver triglyceride level;increased circulating free fatty acid level;increased liver triglyceride level;decreased circulating triglyceride level;decreased triglyceride level;decreased circulating free fatty acid level;decreased circulating cholesterol level;decreased circulating triglyceride level
PPIL3	increased circulating cholesterol level;increased circulating HDL cholesterol level;increased circulating free fatty acid level
PPM1L	decreased circulating free fatty acid level
PPP1CC	abnormal circulating free fatty acids level
PPP1R35	decreased circulating cholesterol level;decreased circulating HDL cholesterol level
PPP1R3C	increased triglyceride level;increased circulating triglyceride level
PRDX3	decreased fatty acid oxidation;decreased circulating triglyceride level;increased circulating cholesterol level;abnormal lipid metabolism
PRF1	increased circulating triglyceride level
PRKAA2	increased circulating free fatty acid level
PRKAR2B	decreased circulating cholesterol level;decreased triglyceride level;decreased triglyceride level;decreased circulating LDL cholesterol level;decreased liver triglyceride level;decreased circulating VLDL cholesterol level;decreased circulating LDL cholesterol level;decreased liver triglyceride level;decreased circulating cholesterol level;decreased circulating VLDL cholesterol level
PRKCD	decreased liver triglyceride level;decreased liver triglyceride level
PRKG1	decreased triglyceride level
PRLHR	increased circulating HDL cholesterol level;increased circulating LDL cholesterol level;increased cholesterol level
PRSS3	abnormal cholesterol homeostasis
PTGDR2	decreased prostaglandin level
PTGES	abnormal prostaglandin level;decreased prostaglandin level
PTGES3	decreased prostaglandin level
PTGIR	decreased prostaglandin level
PTGIS	increased prostaglandin level;decreased prostaglandin level
PTPN11	decreased liver triglyceride level;abnormal lipid level;enhanced lipolysis;decreased triglyceride level;increased glycerol level
PTPN23	abnormal circulating HDL cholesterol level;abnormal circulating cholesterol level;increased circulating cholesterol level;increased circulating HDL cholesterol level
PUS10	decreased circulating free fatty acid level
PZP	increased circulating lipase level
RAB3IP	decreased circulating triglyceride level
RAB5C	decreased circulating LDL cholesterol level;decreased circulating LDL cholesterol level
RAPGEF3	decreased circulating HDL cholesterol level;decreased circulating cholesterol level;increased circulating triglyceride level
RARRES2	decreased circulating free fatty acid level
RASA3	hyperlipidemia
RASAL2	decreased circulating HDL cholesterol level
RBPJ	abnormal circulating cholesterol level;abnormal circulating HDL cholesterol level;decreased circulating triglyceride level
RCN3	abnormal phospholipid level
RFC1	increased circulating HDL cholesterol level;abnormal circulating free fatty acids level;increased circulating cholesterol level;decreased circulating triglyceride level;abnormal circulating triglyceride level
RGS16	increased fatty acid oxidation
RHBDL1	decreased circulating HDL cholesterol level;decreased circulating cholesterol level
RNF10	decreased circulating triglyceride level;abnormal circulating cholesterol level;decreased circulating cholesterol level;decreased circulating HDL cholesterol level;abnormal circulating HDL cholesterol level;abnormal circulating triglyceride level;abnormal circulating triglyceride level
RORA	abnormal lipid homeostasis;decreased circulating HDL cholesterol level;decreased circulating cholesterol level
RRAS	abnormal circulating cholesterol level;decreased circulating HDL cholesterol level;decreased circulating cholesterol level
RSBN1	increased circulating triglyceride level;increased circulating cholesterol level
RSC1A1	increased circulating cholesterol level
RXFP2	increased circulating lipase level
RXRB	decreased cholesterol efflux;decreased cholesterol efflux
SAA1	increased circulating phospholipid level;abnormal cholesterol homeostasis;increased circulating phospholipid level;increased circulating cholesterol level;increased circulating cholesterol level;abnormal cholesterol homeostasis
SAG	decreased circulating HDL cholesterol level;decreased circulating cholesterol level
SAR1B	decreased circulating cholesterol level;decreased circulating HDL cholesterol level;decreased circulating LDL cholesterol level;decreased circulating free fatty acid level
SC5D	abnormal cholesterol homeostasis;decreased cholesterol level;decreased brain cholesterol level
SCARB1	increased circulating cholesterol level;abnormal lipid homeostasis;increased circulating HDL cholesterol level;abnormal circulating cholesterol level;increased circulating cholesterol level;increased circulating HDL cholesterol level;increased circulating HDL cholesterol level;abnormal lipid level;increased circulating cholesterol level;abnormal circulating HDL cholesterol level;increased circula…
SCD	decreased unsaturated fatty acid level;decreased liver triglyceride level;increased saturated fatty acid level;abnormal cholesterol homeostasis;decreased circulating triglyceride level;abnormal lipid level;decreased fatty acid level;decreased circulating triglyceride level;decreased liver triglyceride level
SCIMP	increased circulating cholesterol level
SCUBE3	decreased circulating cholesterol level;decreased circulating glycerol level;decreased circulating free fatty acid level;decreased circulating triglyceride level
SDHA	abnormal circulating free fatty acids level
SEC14L2	decreased circulating VLDL cholesterol level;decreased circulating cholesterol level
SEC16B	decreased circulating LDL cholesterol level;decreased circulating HDL cholesterol level;decreased circulating cholesterol level
SEC24A	decreased circulating LDL cholesterol level;decreased circulating cholesterol level
SERINC3	abnormal circulating glycerol level
SERPINA12	increased liver triglyceride level;increased circulating cholesterol level;increased liver triglyceride level;increased circulating LDL cholesterol level
SERPINA3	decreased circulating triglyceride level
SERPINA5	decreased circulating cholesterol level
SERPINE1	decreased liver triglyceride level;decreased triglyceride level;decreased circulating cholesterol level
SERTAD2	enhanced lipolysis;decreased circulating cholesterol level;abnormal lipid homeostasis;decreased liver triglyceride level;decreased circulating cholesterol level
SERTAD3	increased circulating HDL cholesterol level
SESN2	increased liver triglyceride level
SETBP1	decreased circulating cholesterol level;abnormal circulating cholesterol level;decreased circulating HDL cholesterol level
SETD1A	decreased circulating LDL cholesterol level;decreased circulating cholesterol level;decreased circulating HDL cholesterol level
SFTPA1	abnormal phospholipid level;abnormal phospholipid level
SFTPA2	abnormal phospholipid level;abnormal phospholipid level
SFTPB	abnormal lipid homeostasis
SGMS1	abnormal ceramide level;decreased unsaturated fatty acid level;abnormal sphingomyelin level;abnormal lipid level;abnormal sphingomyelin level;abnormal sphingolipid level;abnormal ceramide level
SH3TC2	increased circulating free fatty acid level
SIDT2	increased liver free fatty acids level;increased circulating triglyceride level;increased liver triglyceride level
SIK2	enhanced lipolysis;increased circulating triglyceride level;decreased fatty acid oxidation
SIK3	decreased circulating HDL cholesterol level;decreased circulating VLDL triglyceride level;increased circulating triglyceride level;decreased circulating triglyceride level;decreased circulating cholesterol level;increased liver cholesterol level;abnormal cholesterol level;decreased circulating triglyceride level;abnormal circulating free fatty acids level;decreased liver cholesterol level;abnorma…
SIRT3	increased circulating triglyceride level;increased circulating LDL cholesterol level;increased liver triglyceride level;increased circulating cholesterol level;increased liver cholesterol level;increased circulating VLDL cholesterol level;abnormal lipid homeostasis
SIRT6	increased circulating cholesterol level
SIRT7	increased liver triglyceride level;abnormal lipid homeostasis;decreased circulating triglyceride level;decreased circulating VLDL triglyceride level
SLC13A5	decreased liver triglyceride level;abnormal glycerol level
SLC20A1	abnormal fatty acid level
SLC22A8	abnormal circulating HDL cholesterol level
SLC27A1	abnormal fatty acid level;abnormal triglyceride level;abnormal lipid level
SLC27A5	decreased circulating cholesterol level;decreased saturated fatty acid level;abnormal lipid level;abnormal lipid homeostasis;decreased liver cholesterol level;decreased circulating triglyceride level;abnormal lipid level;decreased liver triglyceride level;decreased unsaturated fatty acid level;decreased fatty acid level;decreased circulating free fatty acid level
SLC2A2	increased fatty acid level;abnormal lipid homeostasis
SLC2A4	decreased circulating free fatty acid level
SLC37A4	increased circulating triglyceride level;hyperlipidemia;abnormal lipid homeostasis;increased circulating cholesterol level;hyperlipidemia;increased circulating cholesterol level;increased circulating triglyceride level;abnormal lipid homeostasis
SLC38A2	decreased circulating cholesterol level;decreased circulating HDL cholesterol level;decreased circulating triglyceride level;decreased circulating free fatty acid level
SLC3A1	increased circulating cholesterol level;increased circulating LDL cholesterol level;increased circulating cholesterol level;increased circulating LDL cholesterol level
SLC51A	abnormal cholesterol level;decreased circulating triglyceride level;decreased circulating cholesterol level
SLC52A3	abnormal lipid homeostasis;decreased fatty acid beta-oxidation;hyperlipidemia
SLC5A7	decreased circulating HDL cholesterol level;increased circulating triglyceride level
SLC9A3	abnormal cholesterol homeostasis
SLCO1B1	increased circulating cholesterol level
SLCO1B3	increased circulating cholesterol level
SLCO2A1	abnormal prostaglandin level
SLURP1	decreased circulating cholesterol level;decreased circulating triglyceride level
SMC6	decreased circulating HDL cholesterol level
SMOC1	decreased circulating HDL cholesterol level;abnormal circulating HDL cholesterol level
SMPD1	abnormal ceramide level;abnormal lipid homeostasis;abnormal lipid homeostasis;increased circulating HDL cholesterol level
SMPD3	abnormal lipid level
SNF8	decreased circulating free fatty acid level
SOAT2	decreased circulating LDL cholesterol level;increased circulating triglyceride level;increased circulating HDL cholesterol level;abnormal cholesterol homeostasis;decreased circulating cholesterol level;decreased intestinal cholesterol absorption;decreased circulating VLDL cholesterol level
SOD2	abnormal lipid homeostasis
SOX17	decreased liver triglyceride level;abnormal lipid metabolism;decreased circulating HDL cholesterol level
SRA1	decreased liver triglyceride level;decreased liver free fatty acids level
SRCAP	abnormal circulating triglyceride level
SREBF1	decreased circulating cholesterol level;increased liver cholesterol level;decreased circulating triglyceride level;decreased liver triglyceride level;increased liver cholesterol level;increased liver cholesterol level;decreased circulating triglyceride level;decreased circulating cholesterol level;abnormal triglyceride level;decreased circulating cholesterol level;decreased circulating triglyceri…
SREBF2	decreased brain cholesterol level;decreased cholesterol level;decreased liver cholesterol level
SSTR1	increased circulating cholesterol level;increased circulating HDL cholesterol level
SSTR5	decreased circulating cholesterol level
ST3GAL5	abnormal glycosphingolipid level;abnormal lipid homeostasis
STAG3	abnormal circulating HDL cholesterol level
STARD3	increased liver cholesterol level
STAT6	decreased fatty acid level
STK11	abnormal lipid homeostasis
STK16	increased circulating HDL cholesterol level
STRADB	abnormal cholesterol homeostasis
SULT2B1	abnormal cholesterol level
SYNDIG1L	abnormal cholesterol homeostasis
TAPBPL	increased circulating LDL cholesterol level
TBC1D10A	decreased circulating LDL cholesterol level
TBC1D22A	abnormal circulating free fatty acids level;decreased circulating triglyceride level
TCF19	decreased circulating cholesterol level;decreased circulating cholesterol level;decreased circulating cholesterol level;decreased circulating cholesterol level;decreased circulating cholesterol level;decreased circulating cholesterol level;decreased circulating cholesterol level
TERF2IP	increased cholesterol level
TEX261	abnormal circulating cholesterol level;decreased circulating cholesterol level;decreased circulating glycerol level;decreased circulating glycerol level;abnormal circulating cholesterol level;decreased circulating triglyceride level;decreased circulating triglyceride level;decreased circulating HDL cholesterol level;abnormal circulating LDL cholesterol level;abnormal circulating LDL cholesterol l…
TFAP4	abnormal circulating triglyceride level;abnormal circulating cholesterol level
TGFB1I1	increased circulating cholesterol level;increased circulating glycerol level
THEM5	decreased fatty acid level;increased circulating free fatty acid level
THRA	impaired lipolysis
THRB	decreased circulating glycerol level;decreased circulating free fatty acid level
THRSP	abnormal lipid homeostasis;decreased triglyceride level
TIAL1	decreased circulating cholesterol level;decreased circulating triglyceride level;decreased circulating HDL cholesterol level;decreased circulating glycerol level
TLR2	increased circulating free fatty acid level;abnormal circulating lipid level;abnormal circulating LDL cholesterol level;decreased circulating VLDL cholesterol level;abnormal circulating cholesterol level
TM6SF2	decreased circulating LDL cholesterol level;decreased circulating HDL cholesterol level;decreased circulating LDL cholesterol level;decreased circulating VLDL triglyceride level;decreased intestinal cholesterol absorption;increased liver triglyceride level;increased liver triglyceride level;abnormal cholesterol homeostasis;increased circulating triglyceride level;decreased circulating cholesterol…
TM9SF4	increased circulating cholesterol level;increased circulating HDL cholesterol level;abnormal circulating cholesterol level
TMC6	decreased circulating HDL cholesterol level
TMEM100	decreased circulating HDL cholesterol level
TMEM132B	abnormal cholesterol homeostasis
TMEM145	increased circulating triglyceride level
TMEM167A	decreased circulating triglyceride level
TMEM175	abnormal cholesterol homeostasis
TMEM203	decreased circulating HDL cholesterol level;decreased circulating cholesterol level
TMEM237	abnormal circulating triglyceride level;increased circulating triglyceride level
TMEM51	increased circulating HDL cholesterol level
TMPRSS6	decreased circulating triglyceride level
TNF	abnormal lipid homeostasis;decreased liver free fatty acids level;abnormal lipid homeostasis;decreased circulating triglyceride level;decreased circulating triglyceride level;decreased liver free fatty acids level;abnormal lipid homeostasis;decreased liver free fatty acids level;decreased circulating triglyceride level;abnormal lipid homeostasis;decreased liver free fatty acids level;decreased ci…
TNFAIP1	increased circulating triglyceride level;increased circulating triglyceride level
TNIK	decreased circulating cholesterol level;decreased circulating HDL cholesterol level
TNK2	decreased circulating cholesterol level
TNKS	abnormal circulating cholesterol level;abnormal circulating HDL cholesterol level;decreased circulating triglyceride level;abnormal circulating triglyceride level
TPCN2	increased circulating triglyceride level
TPPP	abnormal cholesterol homeostasis
TRA2B	increased circulating triglyceride level;increased circulating VLDL triglyceride level
TRH	abnormal circulating HDL cholesterol level;abnormal circulating cholesterol level;increased circulating cholesterol level
TRIM13	increased circulating triglyceride level
TRIM39	abnormal circulating cholesterol level;abnormal circulating cholesterol level;abnormal circulating HDL cholesterol level;abnormal circulating cholesterol level;decreased circulating cholesterol level;abnormal circulating cholesterol level;abnormal circulating HDL cholesterol level;decreased circulating cholesterol level;abnormal circulating cholesterol level;abnormal circulating cholesterol level…
TRMT10A	increased circulating free fatty acid level;decreased circulating HDL cholesterol level;decreased circulating cholesterol level;increased circulating glycerol level;decreased circulating LDL cholesterol level
TRPC1	decreased circulating triglyceride level
TRUB2	abnormal circulating cholesterol level;increased circulating cholesterol level
TSHR	increased circulating cholesterol level
TTC28	decreased circulating triglyceride level;decreased circulating cholesterol level;decreased circulating HDL cholesterol level
TTLL4	decreased circulating LDL cholesterol level
TUBG1	abnormal cholesterol homeostasis
TUFT1	decreased circulating triglyceride level;decreased circulating HDL cholesterol level
TXNIP	increased circulating triglyceride level;abnormal lipid homeostasis;abnormal lipid homeostasis;increased circulating free fatty acid level;abnormal circulating triglyceride level;increased circulating triglyceride level;increased circulating triglyceride level;increased fatty acid level;increased circulating triglyceride level;abnormal circulating phospholipid level;increased circulating choleste…
TYK2	increased cholesterol level;increased circulating free fatty acid level
UBASH3A	decreased circulating triglyceride level
UBE3B	decreased circulating LDL cholesterol level;decreased circulating cholesterol level
UBR1	decreased circulating triglyceride level
UCP1	decreased circulating free fatty acid level;abnormal lipid homeostasis;decreased circulating triglyceride level
UMOD	decreased circulating triglyceride level;decreased circulating cholesterol level;decreased circulating cholesterol level;decreased circulating triglyceride level;abnormal circulating lipid level;decreased circulating cholesterol level;decreased circulating triglyceride level;decreased circulating triglyceride level;abnormal circulating lipid level
UNC5CL	increased circulating cholesterol level
USH1C	decreased circulating triglyceride level
USHBP1	decreased circulating triglyceride level;decreased circulating glycerol level
USP19	decreased circulating cholesterol level;abnormal circulating free fatty acids level;decreased circulating HDL cholesterol level
USP3	decreased circulating LDL cholesterol level
USP47	decreased circulating triglyceride level;increased circulating cholesterol level;increased circulating HDL cholesterol level
VAMP8	abnormal circulating lipase level
VGF	abnormal circulating triglyceride level
VLDLR	increased circulating cholesterol level;increased circulating triglyceride level
VMP1	decreased circulating cholesterol level;abnormal lipid level
VPS13C	abnormal circulating lipase level;increased circulating lipase level
VPS51	decreased circulating HDL cholesterol level;abnormal circulating HDL cholesterol level
WDTC1	abnormal circulating LDL cholesterol level;abnormal circulating HDL cholesterol level
WNT1	increased circulating cholesterol level
WRAP53	abnormal circulating triglyceride level;decreased circulating HDL cholesterol level;decreased circulating cholesterol level;decreased circulating LDL cholesterol level;decreased circulating triglyceride level
WWOX	decreased circulating triglyceride level;decreased circulating cholesterol level
XBP1	increased circulating free fatty acid level
XPA	increased prostaglandin level
YDJC	abnormal circulating HDL cholesterol level
YWHAB	abnormal circulating cholesterol level;decreased circulating cholesterol level;decreased circulating triglyceride level;abnormal circulating HDL cholesterol level
ZC3H11A	decreased circulating triglyceride level
ZC3H11B	decreased circulating triglyceride level
ZDHHC11	decreased circulating free fatty acid level
ZDHHC11B	decreased circulating free fatty acid level
ZDHHC4	increased circulating free fatty acid level;abnormal lipid homeostasis;increased circulating triglyceride level
ZFP91	increased circulating triglyceride level
ZFYVE28	decreased circulating LDL cholesterol level
ZNF32	abnormal circulating free fatty acids level
ZNF664	abnormal circulating cholesterol level;abnormal circulating LDL cholesterol level
ZNF781	abnormal circulating cholesterol level;decreased circulating LDL cholesterol level;decreased circulating HDL cholesterol level;decreased circulating cholesterol level;abnormal circulating LDL cholesterol level
